# Supplementary material
Source: publisher figshare collection journal article supplement (https://karger.figshare.com/articles/dataset/_/5104510)
Supplement: Supplementary file 1 [file 1]

|                                                                                                                                                                                                                                                                                                                                                                                                                         |
|-------------------------------------------------------------------------------------------------------------------------------------------------------------------------------------------------------------------------------------------------------------------------------------------------------------------------------------------------------------------------------------------------------------------------|
| Gene Description                                                                                                                                                                                                                                                                                                                                                                                                        |
| CD3 antigen, gamma polypeptide                                                                                                                                                                                                                                                                                                                                                                                          |
| inter-alpha trypsin inhibitor, heavy chain 3                                                                                                                                                                                                                                                                                                                                                                            |
| ryanodine receptor 1, skeletal muscle                                                                                                                                                                                                                                                                                                                                                                                   |
| integrator complex subunit 7                                                                                                                                                                                                                                                                                                                                                                                            |
| Tnf receptor associated factor 4                                                                                                                                                                                                                                                                                                                                                                                        |
| cadherin 11                                                                                                                                                                                                                                                                                                                                                                                                             |
| interferon regulatory factor 2 binding protein 1                                                                                                                                                                                                                                                                                                                                                                        |
| SRY-box containing gene 2                                                                                                                                                                                                                                                                                                                                                                                               |
| Kruppel-like factor 3 (basic)                                                                                                                                                                                                                                                                                                                                                                                           |
| Kruppel-like factor 3 (basic)                                                                                                                                                                                                                                                                                                                                                                                           |
| lysosomal-associated protein transmembrane 5                                                                                                                                                                                                                                                                                                                                                                            |
| interferon-induced protein 35                                                                                                                                                                                                                                                                                                                                                                                           |
| tousled-like kinase 2 (Arabidopsis)                                                                                                                                                                                                                                                                                                                                                                                     |
| Yamaguchi sarcoma viral (v-yes) oncogene homolog 1                                                                                                                                                                                                                                                                                                                                                                      |
| matrix metallopeptidase 11                                                                                                                                                                                                                                                                                                                                                                                              |
| myosin binding protein H                                                                                                                                                                                                                                                                                                                                                                                                |
| metal response element binding transcription factor 1                                                                                                                                                                                                                                                                                                                                                                   |
| chondroitin sulfate proteoglycan 2                                                                                                                                                                                                                                                                                                                                                                                      |
| solute carrier family 4 (anion exchanger), member 2                                                                                                                                                                                                                                                                                                                                                                     |
| cholinergic receptor, nicotinic, alpha polypeptide 1 (muscle)                                                                                                                                                                                                                                                                                                                                                           |
| cytokine inducible SH2-containing protein                                                                                                                                                                                                                                                                                                                                                                               |
| myeloblastosis oncogene-like 2                                                                                                                                                                                                                                                                                                                                                                                          |
| shroom                                                                                                                                                                                                                                                                                                                                                                                                                  |
| branched chain aminotransferase 1, cytosolic                                                                                                                                                                                                                                                                                                                                                                            |
| peroxisomal biogenesis factor 14                                                                                                                                                                                                                                                                                                                                                                                        |
| peroxisomal biogenesis factor 14                                                                                                                                                                                                                                                                                                                                                                                        |
| peroxisomal biogenesis factor 14                                                                                                                                                                                                                                                                                                                                                                                        |
| uridine phosphorylase 1                                                                                                                                                                                                                                                                                                                                                                                                 |
| trans-acting transcription factor 1                                                                                                                                                                                                                                                                                                                                                                                     |
| mutS homolog 2 (E. coli)                                                                                                                                                                                                                                                                                                                                                                                                |
| serine (or cysteine) peptidase inhibitor, clade B, member 5                                                                                                                                                                                                                                                                                                                                                             |
| natriuretic peptide receptor 1                                                                                                                                                                                                                                                                                                                                                                                          |
| DEAD (Asp-Glu-Ala-Asp) box polypeptide 18                                                                                                                                                                                                                                                                                                                                                                               |
| transmembrane protein 4                                                                                                                                                                                                                                                                                                                                                                                                 |
| mitochondrial ribosomal protein L17                                                                                                                                                                                                                                                                                                                                                                                     |
| DNA segment, Chr 11, ERATO Doi 333, expressed                                                                                                                                                                                                                                                                                                                                                                           |
| hydroxyacyl glutathione hydrolase                                                                                                                                                                                                                                                                                                                                                                                       |
| RIKEN cDNA 2310020A21 gene                                                                                                                                                                                                                                                                                                                                                                                              |
| claudin 11                                                                                                                                                                                                                                                                                                                                                                                                              |
| methylenetetrahydrofolate dehydrogenase (NAD+ dependent), methenyltetrahydrofolate cyclohydrolase                                                                                                                                                                                                                                                                                                                       |
| synaptosomal-associated protein 25                                                                                                                                                                                                                                                                                                                                                                                      |
| RAS-related protein-1a /// similar to Ras-related protein Rap-1A (Ras-related protein Krev-1) /// similar to Ras-related protein Rap-1A (Ras-related protein Krev-1) /// similar to Ras-related protein Rap-1A precursor (Ras-related protein Krev-1) /// similar to Ras-related protein Rap-1A precursor (Ras-related protein Krev-1) /// similar to Ras-related protein Rap-1A precursor (Ras-related protein Krev-1) |
| high mobility group AT-hook 1                                                                                                                                                                                                                                                                                                                                                                                           |
| inhibitor of DNA binding 1                                                                                                                                                                                                                                                                                                                                                                                              |
| stomatin                                                                                                                                                                                                                                                                                                                                                                                                                |
| stomatin                                                                                                                                                                                                                                                                                                                                                                                                                |
| DNA segment, Chr 2, Wayne State University 81, expressed                                                                                                                                                                                                                                                                                                                                                                |
| F-box and WD-40 domain protein 2                                                                                                                                                                                                                                                                                                                                                                                        |
| non-SMC element 1 homolog (S. cerevisiae)                                                                                                                                                                                                                                                                                                                                                                               |
| RIKEN cDNA 2810453I06 gene                                                                                                                                                                                                                                                                                                                                                                                              |
| cytochrome b-245, alpha polypeptide                                                                                                                                                                                                                                                                                                                                                                                     |
| kallikrein 1 /// kallikrein 1-related peptidase b5                                                                                                                                                                                                                                                                                                                                                                      |

|                                                                                                                                                                                                                                                                                                        |
|--------------------------------------------------------------------------------------------------------------------------------------------------------------------------------------------------------------------------------------------------------------------------------------------------------|
| kallikrein 1                                                                                                                                                                                                                                                                                           |
| similar to DNA replication licensing factor MCM3 (DNA polymerase alpha holoenzyme-associated protein P1) (P1-MCM3)                                                                                                                                                                                     |
| gap junction membrane channel protein alpha 1                                                                                                                                                                                                                                                          |
| gap junction membrane channel protein alpha 1                                                                                                                                                                                                                                                          |
| phosphoribosylglycinamide formyltransferase                                                                                                                                                                                                                                                            |
| aldo-keto reductase family 1, member B3 (aldose reductase) /// similar to Aldose reductase (AR) (Aldehyde reductase) /// |
| aldehyde dehydrogenase family 1, subfamily A1                                                                                                                                                                                                                                                          |
| cytochrome P450, family 2, subfamily f, polypeptide 2                                                                                                                                                                                                                                                  |
| major urinary protein 1 /// major urinary protein 2 /// similar to alpha-2u globulin PGCL3                                                                                                                                                                                                             |
| WD repeat domain 39                                                                                                                                                                                                                                                                                    |
| RIKEN cDNA 2510005D08 gene                                                                                                                                                                                                                                                                             |
| transmembrane emp24 protein transport domain containing 9                                                                                                                                                                                                                                              |
| apolipoprotein A-IV                                                                                                                                                                                                                                                                                    |
| NADH dehydrogenase (ubiquinone) 1 beta subcomplex, 9                                                                                                                                                                                                                                                   |
| parotid secretory protein                                                                                                                                                                                                                                                                              |
| stress-induced phosphoprotein 1                                                                                                                                                                                                                                                                        |
| transcription factor 1                                                                                                                                                                                                                                                                                 |
| villin 2                                                                                                                                                                                                                                                                                               |
| gamma-glutamyltransferase 1                                                                                                                                                                                                                                                                            |
| low density lipoprotein receptor-related protein associated protein 1                                                                                                                                                                                                                                  |
| protein phosphatase 1, catalytic subunit, beta isoform                                                                                                                                                                                                                                                 |
| peptidylprolyl isomerase C                                                                                                                                                                                                                                                                             |
| solute carrier family 35, member B1                                                                                                                                                                                                                                                                    |
| PCTAIRE-motif protein kinase 1                                                                                                                                                                                                                                                                         |
| suppressor of Ty 5 homolog (S. cerevisiae)                                                                                                                                                                                                                                                             |
| scavenger receptor class B, member 1                                                                                                                                                                                                                                                                   |
| sphingomyelin phosphodiesterase 1, acid lysosomal                                                                                                                                                                                                                                                      |
| serine (or cysteine) peptidase inhibitor, clade B, member 1a                                                                                                                                                                                                                                           |
| small nuclear ribonucleoprotein polypeptide A                                                                                                                                                                                                                                                          |
| RIKEN cDNA 2210010C04 gene                                                                                                                                                                                                                                                                             |
| RIKEN cDNA 2210010C04 gene                                                                                                                                                                                                                                                                             |
| trefoil factor 3, intestinal                                                                                                                                                                                                                                                                           |
| keratin complex 1, acidic, gene 13                                                                                                                                                                                                                                                                     |
| chemokine (C-X-C motif) ligand 12                                                                                                                                                                                                                                                                      |
| kinesin-associated protein 3                                                                                                                                                                                                                                                                           |
| RIKEN cDNA 2610028H07 gene                                                                                                                                                                                                                                                                             |
| RIKEN cDNA 2810417H13 gene                                                                                                                                                                                                                                                                             |
| diablo homolog (Drosophila)                                                                                                                                                                                                                                                                            |
| nidogen 1                                                                                                                                                                                                                                                                                              |
| guanine nucleotide binding protein, beta 5                                                                                                                                                                                                                                                             |
| integrin beta 1 (fibronectin receptor beta)                                                                                                                                                                                                                                                            |
| integrin beta 1 (fibronectin receptor beta)                                                                                                                                                                                                                                                            |
| proliferation-associated 2G4                                                                                                                                                                                                                                                                           |
| chromatin accessibility complex 1                                                                                                                                                                                                                                                                      |
| cellular retinoic acid binding protein II                                                                                                                                                                                                                                                              |
| cell division cycle 2 homolog A (S. pombe)                                                                                                                                                                                                                                                             |
| Jun oncogene                                                                                                                                                                                                                                                                                           |
| secretogranin V                                                                                                                                                                                                                                                                                        |
| Fyn proto-oncogene                                                                                                                                                                                                                                                                                     |
| endoglin                                                                                                                                                                                                                                                                                               |
| lysosomal membrane glycoprotein 2                                                                                                                                                                                                                                                                      |
| RNA binding motif protein 14                                                                                                                                                                                                                                                                           |
| proprotein convertase subtilisin/kexin type 1 inhibitor                                                                                                                                                                                                                                                |

|                                                                                                                                                               |
|---------------------------------------------------------------------------------------------------------------------------------------------------------------|
| Finkel-Biskis-Reilly murine sarcoma virus (FBR-MuSV) ubiquitously expressed (fox derived)                                                                     |
| DiGeorge syndrome critical region gene 2                                                                                                                      |
| zyxin                                                                                                                                                         |
| nucleolin                                                                                                                                                     |
| aconitase 1                                                                                                                                                   |
| CCCTC-binding factor                                                                                                                                          |
| minichromosome maintenance deficient 6 (MIS5 homolog, S. pombe) (S. cerevisiae)                                                                               |
| insulin II                                                                                                                                                    |
| serine incorporator 3                                                                                                                                         |
| neural cell adhesion molecule 1                                                                                                                               |
| neural cell adhesion molecule 1                                                                                                                               |
| TAP binding protein                                                                                                                                           |
| discoidin domain receptor family, member 1                                                                                                                    |
| minichromosome maintenance deficient 5, cell division cycle 46 (S. cerevisiae)                                                                                |
| ribosomal protein L41                                                                                                                                         |
| proteasome (prosome, macropain) 26S subunit, ATPase 3                                                                                                         |
| jumonji, AT rich interactive domain 1D (Rbp2 like)                                                                                                            |
| inhibin beta-A                                                                                                                                                |
| cyclin-dependent kinase inhibitor 1B (P27)                                                                                                                    |
| ST3 beta-galactoside alpha-2,3-sialyltransferase 2                                                                                                            |
| histone 1, H1t                                                                                                                                                |
| Germ cell-less homolog 1 (Drosophila)                                                                                                                         |
| 5-hydroxytryptamine (serotonin) receptor 7                                                                                                                    |
| SRY-box containing gene 10                                                                                                                                    |
| zinc finger protein of the cerebellum 4                                                                                                                       |
| procollagen, type IV, alpha 3                                                                                                                                 |
| macrophage stimulating 1 (hepatocyte growth factor-like)                                                                                                      |
| immunoglobulin (CD79A) binding protein 1b                                                                                                                     |
| ephrin A3                                                                                                                                                     |
| RIKEN cDNA 6230416J20 gene                                                                                                                                    |
| Casitas B-lineage lymphoma                                                                                                                                    |
| SH2 domain protein 2A                                                                                                                                         |
| CD59b antigen                                                                                                                                                 |
| DNA fragmentation factor, beta subunit                                                                                                                        |
| hypothetical protein LOC207685                                                                                                                                |
| testis expressed gene 2                                                                                                                                       |
| WD repeat domain 26                                                                                                                                           |
| persephin                                                                                                                                                     |
| similar to Ig kappa chain V-V region K2 precursor /// similar to Ig kappa chain V-V region K2 precursor /// similar to Ig kappa chain V-V region L7 precursor |
| cytochrome b-245, beta polypeptide                                                                                                                            |
| estrogen related receptor, beta                                                                                                                               |
| v-maf musculoaponeurotic fibrosarcoma oncogene family, protein F (avian)                                                                                      |
| histocompatibility 2, M region locus 10.1                                                                                                                     |
| histocompatibility 2, M region locus 10.1                                                                                                                     |
| histocompatibility 2, M region locus 10.1                                                                                                                     |
| RIKEN cDNA 2700007P21 gene                                                                                                                                    |
| nuclear factor I/X                                                                                                                                            |
| procollagen, type VIII, alpha 1                                                                                                                               |
| met proto-oncogene                                                                                                                                            |
| eosinophil-associated, ribonuclease A family, member 1                                                                                                        |
| integrin alpha 8                                                                                                                                              |
| integrin alpha 8                                                                                                                                              |
| ATPase, aminophospholipid transporter (APLT), class I, type 8A, member 1                                                                                      |

|                                                                                                                                                                                                                                                                                                                                                                                                                                                                                                                                                                                                                                                                                                                                                                                                                                                                                                                                                                                                                                                                                                                                                                                                                                                |
|------------------------------------------------------------------------------------------------------------------------------------------------------------------------------------------------------------------------------------------------------------------------------------------------------------------------------------------------------------------------------------------------------------------------------------------------------------------------------------------------------------------------------------------------------------------------------------------------------------------------------------------------------------------------------------------------------------------------------------------------------------------------------------------------------------------------------------------------------------------------------------------------------------------------------------------------------------------------------------------------------------------------------------------------------------------------------------------------------------------------------------------------------------------------------------------------------------------------------------------------|
| protein phosphatase, EF hand calcium-binding domain 2                                                                                                                                                                                                                                                                                                                                                                                                                                                                                                                                                                                                                                                                                                                                                                                                                                                                                                                                                                                                                                                                                                                                                                                          |
| DnaJ (Hsp40) related, subfamily B, member 13                                                                                                                                                                                                                                                                                                                                                                                                                                                                                                                                                                                                                                                                                                                                                                                                                                                                                                                                                                                                                                                                                                                                                                                                   |
| interleukin 10                                                                                                                                                                                                                                                                                                                                                                                                                                                                                                                                                                                                                                                                                                                                                                                                                                                                                                                                                                                                                                                                                                                                                                                                                                 |
| karyopherin (importin) alpha 4                                                                                                                                                                                                                                                                                                                                                                                                                                                                                                                                                                                                                                                                                                                                                                                                                                                                                                                                                                                                                                                                                                                                                                                                                 |
| RIKEN cDNA 2210418O10 gene                                                                                                                                                                                                                                                                                                                                                                                                                                                                                                                                                                                                                                                                                                                                                                                                                                                                                                                                                                                                                                                                                                                                                                                                                     |
| ---                                                                                                                                                                                                                                                                                                                                                                                                                                                                                                                                                                                                                                                                                                                                                                                                                                                                                                                                                                                                                                                                                                                                                                                                                                            |
| S-adenosylmethionine decarboxylase 1 /// S-adenosylmethionine decarboxylase 2                                                                                                                                                                                                                                                                                                                                                                                                                                                                                                                                                                                                                                                                                                                                                                                                                                                                                                                                                                                                                                                                                                                                                                  |
| S-adenosylmethionine decarboxylase 1 /// S-adenosylmethionine decarboxylase 2                                                                                                                                                                                                                                                                                                                                                                                                                                                                                                                                                                                                                                                                                                                                                                                                                                                                                                                                                                                                                                                                                                                                                                  |
| glycoprotein 49 A                                                                                                                                                                                                                                                                                                                                                                                                                                                                                                                                                                                                                                                                                                                                                                                                                                                                                                                                                                                                                                                                                                                                                                                                                              |
| killer cell lectin-like receptor subfamily A, member 10 /// killer cell lectin-like receptor, subfamily A, member 8 /// killer cell lectin-like receptor subfamily A, member 21 /// similar to killer cell lectin-like receptor subfamily A, member 21 /// killer cell lectin-like receptor subfamily A member 29 /// similar to killer cell lectin-like receptor subfamily A, member 21 /// similar to Killer cell lectin-like receptor 8 (T-cell surface glycoprotein Ly-49H) (Ly49-H antigen) (Lymphocyte antigen 49H)                                                                                                                                                                                                                                                                                                                                                                                                                                                                                                                                                                                                                                                                                                                      |
| lymphotoxin A                                                                                                                                                                                                                                                                                                                                                                                                                                                                                                                                                                                                                                                                                                                                                                                                                                                                                                                                                                                                                                                                                                                                                                                                                                  |
| paired-Ig-like receptor A1 /// paired-Ig-like receptor A11 /// paired-Ig-like receptor A2 /// paired-Ig-like receptor A3 /// paired-Ig-like receptor A4 /// paired-Ig-like receptor A6 /// leukocyte immunoglobulin-like receptor, subfamily B (with TM and ITIM domains), member 3 /// hypothetical LOC619608 /// similar to paired-Ig-like receptor A6 isoform a /// similar to paired-Ig-like receptor A11 /// similar to paired-Ig-like receptor A11 /// similar to paired-Ig-like receptor A6 isoform a /// similar to paired-Ig-like receptor A1                                                                                                                                                                                                                                                                                                                                                                                                                                                                                                                                                                                                                                                                                         |
| serine (or cysteine) peptidase inhibitor, clade A, member 1a /// serine (or cysteine) preptidase inhibitor, clade A, member 1b /// serine (or cysteine) peptidase inhibitor, clade A, member 1c                                                                                                                                                                                                                                                                                                                                                                                                                                                                                                                                                                                                                                                                                                                                                                                                                                                                                                                                                                                                                                                |
| peroxiredoxin 2 /// similar to Peroxiredoxin-2 (Thioredoxin peroxidase 1) (Thioredoxin-dependent peroxide reductase 1) (Thiol-specific antioxidant protein) (TSA)                                                                                                                                                                                                                                                                                                                                                                                                                                                                                                                                                                                                                                                                                                                                                                                                                                                                                                                                                                                                                                                                              |
| peroxiredoxin 2                                                                                                                                                                                                                                                                                                                                                                                                                                                                                                                                                                                                                                                                                                                                                                                                                                                                                                                                                                                                                                                                                                                                                                                                                                |
| peroxiredoxin 6 /// peroxiredoxin 6, related sequence 1                                                                                                                                                                                                                                                                                                                                                                                                                                                                                                                                                                                                                                                                                                                                                                                                                                                                                                                                                                                                                                                                                                                                                                                        |
| serum amyloid A 2                                                                                                                                                                                                                                                                                                                                                                                                                                                                                                                                                                                                                                                                                                                                                                                                                                                                                                                                                                                                                                                                                                                                                                                                                              |
| epidermal growth factor binding protein type B                                                                                                                                                                                                                                                                                                                                                                                                                                                                                                                                                                                                                                                                                                                                                                                                                                                                                                                                                                                                                                                                                                                                                                                                 |
| ATPase, Cu++ transporting, beta polypeptide                                                                                                                                                                                                                                                                                                                                                                                                                                                                                                                                                                                                                                                                                                                                                                                                                                                                                                                                                                                                                                                                                                                                                                                                    |
| bone gamma-carboxyglutamate protein, related sequence 1 /// bone gamma carboxyglutamate protein 1 /// bone gamma-carboxyglutamate protein 2                                                                                                                                                                                                                                                                                                                                                                                                                                                                                                                                                                                                                                                                                                                                                                                                                                                                                                                                                                                                                                                                                                    |
| calcium channel, voltage-dependent, R type, alpha 1E subunit                                                                                                                                                                                                                                                                                                                                                                                                                                                                                                                                                                                                                                                                                                                                                                                                                                                                                                                                                                                                                                                                                                                                                                                   |
| calcium channel, voltage-dependent, R type, alpha 1E subunit                                                                                                                                                                                                                                                                                                                                                                                                                                                                                                                                                                                                                                                                                                                                                                                                                                                                                                                                                                                                                                                                                                                                                                                   |
| solute carrier family 10 (sodium/bile acid cotransporter family), member 1                                                                                                                                                                                                                                                                                                                                                                                                                                                                                                                                                                                                                                                                                                                                                                                                                                                                                                                                                                                                                                                                                                                                                                     |
| solute carrier family 10 (sodium/bile acid cotransporter family), member 1                                                                                                                                                                                                                                                                                                                                                                                                                                                                                                                                                                                                                                                                                                                                                                                                                                                                                                                                                                                                                                                                                                                                                                     |
| solute carrier family 10 (sodium/bile acid cotransporter family), member 1                                                                                                                                                                                                                                                                                                                                                                                                                                                                                                                                                                                                                                                                                                                                                                                                                                                                                                                                                                                                                                                                                                                                                                     |
| tubulin, alpha 1                                                                                                                                                                                                                                                                                                                                                                                                                                                                                                                                                                                                                                                                                                                                                                                                                                                                                                                                                                                                                                                                                                                                                                                                                               |
| tubulin, alpha 1                                                                                                                                                                                                                                                                                                                                                                                                                                                                                                                                                                                                                                                                                                                                                                                                                                                                                                                                                                                                                                                                                                                                                                                                                               |
| ---                                                                                                                                                                                                                                                                                                                                                                                                                                                                                                                                                                                                                                                                                                                                                                                                                                                                                                                                                                                                                                                                                                                                                                                                                                            |
| vesicle-associated membrane protein 8                                                                                                                                                                                                                                                                                                                                                                                                                                                                                                                                                                                                                                                                                                                                                                                                                                                                                                                                                                                                                                                                                                                                                                                                          |
| fibroblast growth factor 9                                                                                                                                                                                                                                                                                                                                                                                                                                                                                                                                                                                                                                                                                                                                                                                                                                                                                                                                                                                                                                                                                                                                                                                                                     |
| expressed sequence D17892                                                                                                                                                                                                                                                                                                                                                                                                                                                                                                                                                                                                                                                                                                                                                                                                                                                                                                                                                                                                                                                                                                                                                                                                                      |
| hypothetical protein LOC665081                                                                                                                                                                                                                                                                                                                                                                                                                                                                                                                                                                                                                                                                                                                                                                                                                                                                                                                                                                                                                                                                                                                                                                                                                 |
| ---                                                                                                                                                                                                                                                                                                                                                                                                                                                                                                                                                                                                                                                                                                                                                                                                                                                                                                                                                                                                                                                                                                                                                                                                                                            |
| ---                                                                                                                                                                                                                                                                                                                                                                                                                                                                                                                                                                                                                                                                                                                                                                                                                                                                                                                                                                                                                                                                                                                                                                                                                                            |
| defensin related cryptdin 2 /// defensin related cryptdin 3 /// defensin related cryptdin 17 /// defensin-related cryptdin 23 /// defensin related cryptdin 26                                                                                                                                                                                                                                                                                                                                                                                                                                                                                                                                                                                                                                                                                                                                                                                                                                                                                                                                                                                                                                                                                 |
| heat shock protein 4                                                                                                                                                                                                                                                                                                                                                                                                                                                                                                                                                                                                                                                                                                                                                                                                                                                                                                                                                                                                                                                                                                                                                                                                                           |
| heat shock protein 4                                                                                                                                                                                                                                                                                                                                                                                                                                                                                                                                                                                                                                                                                                                                                                                                                                                                                                                                                                                                                                                                                                                                                                                                                           |
| T-box 15                                                                                                                                                                                                                                                                                                                                                                                                                                                                                                                                                                                                                                                                                                                                                                                                                                                                                                                                                                                                                                                                                                                                                                                                                                       |
| T-box 15                                                                                                                                                                                                                                                                                                                                                                                                                                                                                                                                                                                                                                                                                                                                                                                                                                                                                                                                                                                                                                                                                                                                                                                                                                       |
| G protein-coupled receptor associated sorting protein 1                                                                                                                                                                                                                                                                                                                                                                                                                                                                                                                                                                                                                                                                                                                                                                                                                                                                                                                                                                                                                                                                                                                                                                                        |
| G protein-coupled receptor associated sorting protein 1                                                                                                                                                                                                                                                                                                                                                                                                                                                                                                                                                                                                                                                                                                                                                                                                                                                                                                                                                                                                                                                                                                                                                                                        |
| t-complex protein 10a /// t-complex protein 10b /// t-complex protein 10c                                                                                                                                                                                                                                                                                                                                                                                                                                                                                                                                                                                                                                                                                                                                                                                                                                                                                                                                                                                                                                                                                                                                                                      |
| t-complex protein 10b                                                                                                                                                                                                                                                                                                                                                                                                                                                                                                                                                                                                                                                                                                                                                                                                                                                                                                                                                                                                                                                                                                                                                                                                                          |
| immunoglobulin heavy chain 4 (serum IgG1) /// immunoglobulin heavy chain 6 (heavy chain of IgM) /// immunoglobulin heavy chain (J558 family) /// similar to immunoglobulin heavy chain variable region /// immunoglobulin heavy chain 1a (serum IgG2a) /// similar to monoclonal antibody heavy chain /// similar to Ig heavy chain V region VH558 A1/A4 precursor /// similar to Ig heavy chain V region 108A precursor /// similar to Ig heavy chain V region 93G7 precursor /// similar to Ig heavy chain V region VH558 A1/A4 precursor /// similar to Ig heavy chain V region VH558 A1/A4 precursor /// similar to Ig heavy chain V region 93G7 precursor /// similar to Ig heavy chain V region VH558 A1/A4 precursor /// similar to Ig heavy chain V region VH558 A1/A4 precursor /// similar to Ig heavy chain V region 36-65 /// similar to Ig heavy chain V region VH558 A1/A4 precursor /// similar to Ig heavy chain V-I region V35 precursor /// similar to Ig heavy chain V-I region V35 precursor /// similar to Ig heavy chain V region 93G7 precursor /// similar to Ig heavy chain V region 93G7 precursor /// similar to Ig heavy chain V region 102 precursor /// similar to Ig heavy chain V region VH558 A1/A4 precursor |
| Immunoglobulin heavy chain 1a (serum IgG2a)                                                                                                                                                                                                                                                                                                                                                                                                                                                                                                                                                                                                                                                                                                                                                                                                                                                                                                                                                                                                                                                                                                                                                                                                    |
| immunoglobulin heavy chain 4 (serum IgG1) /// immunoglobulin heavy chain 6 (heavy chain of IgM) /// immunoglobulin heavy chain (J558 family) /// immunoglobulin heavy chain 1a (serum IgG2a) /// similar to Ig heavy chain V region VH558 A1/A4 precursor /// similar to monoclonal antibody heavy chain /// similar to Ig heavy chain V region VH558 A1/A4 precursor /// similar to Ig heavy chain V region B1-8/186-2 precursor /// similar to Ig heavy chain V region VH558 A1/A4 precursor /// similar to Ig heavy chain V region VH558 A1/A4 precursor /// similar to Ig heavy chain V region VH558 A1/A4 precursor /// similar to Ig heavy chain V region 102 precursor /// similar to Ig heavy chain V region VH558 A1/A4                                                                                                                                                                                                                                                                                                                                                                                                                                                                                                               |

|                                                                                                                                                                                                                                                                                                                                                                                                                                                                                                                                                                                                                                                                                                                                                                                                                                                                                              |
|----------------------------------------------------------------------------------------------------------------------------------------------------------------------------------------------------------------------------------------------------------------------------------------------------------------------------------------------------------------------------------------------------------------------------------------------------------------------------------------------------------------------------------------------------------------------------------------------------------------------------------------------------------------------------------------------------------------------------------------------------------------------------------------------------------------------------------------------------------------------------------------------|
| precursor                                                                                                                                                                                                                                                                                                                                                                                                                                                                                                                                                                                                                                                                                                                                                                                                                                                                                    |
| synaptotagmin IX                                                                                                                                                                                                                                                                                                                                                                                                                                                                                                                                                                                                                                                                                                                                                                                                                                                                             |
| synaptotagmin VI                                                                                                                                                                                                                                                                                                                                                                                                                                                                                                                                                                                                                                                                                                                                                                                                                                                                             |
| synaptotagmin VII                                                                                                                                                                                                                                                                                                                                                                                                                                                                                                                                                                                                                                                                                                                                                                                                                                                                            |
| caspase 9                                                                                                                                                                                                                                                                                                                                                                                                                                                                                                                                                                                                                                                                                                                                                                                                                                                                                    |
| caspase 9                                                                                                                                                                                                                                                                                                                                                                                                                                                                                                                                                                                                                                                                                                                                                                                                                                                                                    |
| caspase 9                                                                                                                                                                                                                                                                                                                                                                                                                                                                                                                                                                                                                                                                                                                                                                                                                                                                                    |
| ST6 (alpha-N-acetyl-neuraminy-2,3-beta-galactosyl-1,3)-N-acetylglactosaminide alpha-2,6-sialyltransferase 6                                                                                                                                                                                                                                                                                                                                                                                                                                                                                                                                                                                                                                                                                                                                                                                  |
| solute carrier family 12, member 5                                                                                                                                                                                                                                                                                                                                                                                                                                                                                                                                                                                                                                                                                                                                                                                                                                                           |
| heterogeneous nuclear ribonucleoprotein A1 /// heterogeneous nuclear ribonucleoprotein A1 pseudogene /// similar to Heterogeneous nuclear ribonucleoprotein A1 (Helix-destabilizing protein) (Single-strand binding protein) (hnRNP core protein A1) (HDP-1) (Topoisomerase-inhibitor suppressed)                                                                                                                                                                                                                                                                                                                                                                                                                                                                                                                                                                                            |
| gamma-aminobutyric acid (GABA-A) receptor, subunit gamma 1                                                                                                                                                                                                                                                                                                                                                                                                                                                                                                                                                                                                                                                                                                                                                                                                                                   |
| solute carrier family 39 (zinc transporter), member 1                                                                                                                                                                                                                                                                                                                                                                                                                                                                                                                                                                                                                                                                                                                                                                                                                                        |
| doublesex and mab-3 related transcription factor 1                                                                                                                                                                                                                                                                                                                                                                                                                                                                                                                                                                                                                                                                                                                                                                                                                                           |
| immunoglobulin heavy chain 4 (serum IgG1) /// immunoglobulin heavy chain (J558 family) /// similar to Ig heavy chain V region B1-8/186-2 precursor /// similar to Ig heavy chain V region 3 precursor /// similar to monoclonal antibody heavy chain /// similar to immunoglobulin mu-chain /// similar to Ig heavy chain V region 102 precursor /// similar to Ig heavy chain V region 3 precursor /// similar to Ig heavy chain V region VH558 B4 precursor /// similar to Ig heavy chain V region 3 precursor /// similar to Ig heavy chain V region 102 precursor /// similar to Ig heavy chain V region 23 precursor /// similar to Ig heavy chain V region 3 precursor /// similar to Ig heavy chain V region 3 precursor /// similar to Ig heavy chain V region 145 precursor /// similar to Ig heavy chain V region 102 precursor /// similar to Ig heavy chain V region 3 precursor |
| Anti-human CD20 antibody 1F5 gamma heavy chain variable region /// Immunoglobulin heavy chain (J558 family) /// Immunoglobulin heavy chain (J558 family)                                                                                                                                                                                                                                                                                                                                                                                                                                                                                                                                                                                                                                                                                                                                     |
| similar to Ig heavy chain V-I region V35 precursor /// similar to Ig heavy chain V-I region V35 precursor /// similar to Ig heavy chain V-I region V35 precursor /// similar to Ig heavy chain V-I region V35 precursor /// similar to Ig heavy chain V region 108A precursor                                                                                                                                                                                                                                                                                                                                                                                                                                                                                                                                                                                                                |
| ---                                                                                                                                                                                                                                                                                                                                                                                                                                                                                                                                                                                                                                                                                                                                                                                                                                                                                          |
| ---                                                                                                                                                                                                                                                                                                                                                                                                                                                                                                                                                                                                                                                                                                                                                                                                                                                                                          |
| H3 histone, family 3A                                                                                                                                                                                                                                                                                                                                                                                                                                                                                                                                                                                                                                                                                                                                                                                                                                                                        |
| actin, alpha 1, skeletal muscle                                                                                                                                                                                                                                                                                                                                                                                                                                                                                                                                                                                                                                                                                                                                                                                                                                                              |
| ST6 (alpha-N-acetyl-neuraminy-2,3-beta-galactosyl-1,3)-N-acetylglactosaminide alpha-2,6-sialyltransferase 1                                                                                                                                                                                                                                                                                                                                                                                                                                                                                                                                                                                                                                                                                                                                                                                  |
| zinc finger protein 179                                                                                                                                                                                                                                                                                                                                                                                                                                                                                                                                                                                                                                                                                                                                                                                                                                                                      |
| heat shock transcription factor 4                                                                                                                                                                                                                                                                                                                                                                                                                                                                                                                                                                                                                                                                                                                                                                                                                                                            |
| glycine receptor, alpha 1 subunit                                                                                                                                                                                                                                                                                                                                                                                                                                                                                                                                                                                                                                                                                                                                                                                                                                                            |
| guanine nucleotide binding protein, alpha z subunit                                                                                                                                                                                                                                                                                                                                                                                                                                                                                                                                                                                                                                                                                                                                                                                                                                          |
| killer cell lectin-like receptor subfamily A, member 12 /// killer cell lectin-like receptor subfamily A, member 13 /// killer cell lectin-like receptor, subfamily A, member 4 /// killer cell lectin-like receptor subfamily A, member 23 /// killer cell lectin-like receptor, subfamily A, member 18 /// similar to Killer cell lectin-like receptor 4 (T-cell surface glycoprotein Ly-49D) (Ly49-D antigen) (Lymphocyte antigen 49D) /// killer cell lectin-like receptor subfamily A member 33 /// similar to killer cell lectin-like receptor subfamily A, member 13                                                                                                                                                                                                                                                                                                                  |
| guanine nucleotide binding protein, alpha o                                                                                                                                                                                                                                                                                                                                                                                                                                                                                                                                                                                                                                                                                                                                                                                                                                                  |
| collagen-like tail subunit (single strand of homotrimer) of asymmetric acetylcholinesterase                                                                                                                                                                                                                                                                                                                                                                                                                                                                                                                                                                                                                                                                                                                                                                                                  |
| beaded filament structural protein in lens-CP94                                                                                                                                                                                                                                                                                                                                                                                                                                                                                                                                                                                                                                                                                                                                                                                                                                              |
| mitogen activated protein kinase 8                                                                                                                                                                                                                                                                                                                                                                                                                                                                                                                                                                                                                                                                                                                                                                                                                                                           |
| apelin                                                                                                                                                                                                                                                                                                                                                                                                                                                                                                                                                                                                                                                                                                                                                                                                                                                                                       |
| vasoactive intestinal polypeptide                                                                                                                                                                                                                                                                                                                                                                                                                                                                                                                                                                                                                                                                                                                                                                                                                                                            |
| podocalyxin-like                                                                                                                                                                                                                                                                                                                                                                                                                                                                                                                                                                                                                                                                                                                                                                                                                                                                             |
| GLI-Kruppel family member GLI2                                                                                                                                                                                                                                                                                                                                                                                                                                                                                                                                                                                                                                                                                                                                                                                                                                                               |
| thymidylate synthase, pseudogene                                                                                                                                                                                                                                                                                                                                                                                                                                                                                                                                                                                                                                                                                                                                                                                                                                                             |
| TYRO protein tyrosine kinase binding protein                                                                                                                                                                                                                                                                                                                                                                                                                                                                                                                                                                                                                                                                                                                                                                                                                                                 |
| kinesin family member 3A                                                                                                                                                                                                                                                                                                                                                                                                                                                                                                                                                                                                                                                                                                                                                                                                                                                                     |
| RIKEN cDNA 4921531G14 gene                                                                                                                                                                                                                                                                                                                                                                                                                                                                                                                                                                                                                                                                                                                                                                                                                                                                   |
| Son cell proliferation protein                                                                                                                                                                                                                                                                                                                                                                                                                                                                                                                                                                                                                                                                                                                                                                                                                                                               |
| zona pellucida 3 receptor                                                                                                                                                                                                                                                                                                                                                                                                                                                                                                                                                                                                                                                                                                                                                                                                                                                                    |
| myosin, light polypeptide 7, regulatory                                                                                                                                                                                                                                                                                                                                                                                                                                                                                                                                                                                                                                                                                                                                                                                                                                                      |
| intraflagellar transport 88 homolog (Chlamydomonas)                                                                                                                                                                                                                                                                                                                                                                                                                                                                                                                                                                                                                                                                                                                                                                                                                                          |
| chromobox homolog 3 (Drosophila HP1 gamma) /// similar to chromobox homolog 3                                                                                                                                                                                                                                                                                                                                                                                                                                                                                                                                                                                                                                                                    |
| protein tyrosine phosphatase, non-receptor type 5                                                                                                                                                                                                                                                                                                                                                                                                                                                                                                                                                                                                                                                                                                                                                                                                                                            |
| galanin                                                                                                                                                                                                                                                                                                                                                                                                                                                                                                                                                                                                                                                                                                                                                                                                                                                                                      |
| polymerase (DNA directed), epsilon 3 (p17 subunit)                                                                                                                                                                                                                                                                                                                                                                                                                                                                                                                                                                                                                                                                                                                                                                                                                                           |
| cadherin 3                                                                                                                                                                                                                                                                                                                                                                                                                                                                                                                                                                                                                                                                                                                                                                                                                                                                                   |

|                                                                                       |
|---------------------------------------------------------------------------------------|
| RIKEN cDNA C330027G06 gene                                                            |
| ---                                                                                   |
| AE binding protein 1                                                                  |
| YLP motif containing 1                                                                |
| myeloperoxidase                                                                       |
| myeloperoxidase                                                                       |
| maternal embryonic leucine zipper kinase                                              |
| solute carrier family 7 (cationic amino acid transporter, y+ system), member 6        |
| guanine nucleotide binding protein (G protein), gamma 2 subunit                       |
| filaggrin /// similar to Filaggrin /// similar to Filaggrin                           |
| keratin complex 2, basic, gene 4                                                      |
| signal transducer and activator of transcription 5A                                   |
| signal transducer and activator of transcription 5A                                   |
| excision repair cross-complementing rodent repair deficiency, complementation group 1 |
| spleen tyrosine kinase                                                                |
| spleen tyrosine kinase                                                                |
| protein tyrosine phosphatase, receptor type, O                                        |
| laminin, gamma 2                                                                      |
| protoporphyrinogen oxidase                                                            |
| leptin receptor                                                                       |
| leptin receptor                                                                       |
| MyoD family inhibitor                                                                 |
| MyoD family inhibitor                                                                 |
| MyoD family inhibitor                                                                 |
| endothelial differentiation, lysophosphatidic acid G-protein-coupled receptor, 2      |
| orosomucoid 1                                                                         |
| orosomucoid 1 /// orosomucoid 2                                                       |
| G protein-coupled receptor 19                                                         |
| ankyrin 1, erythroid                                                                  |
| ankyrin 1, erythroid                                                                  |
| ankyrin 1, erythroid                                                                  |
| transforming growth factor beta regulated gene 4                                      |
| branched chain aminotransferase 2, mitochondrial                                      |
| cyclin-dependent kinase 5                                                             |
| small proline-rich protein 1B                                                         |
| small proline-rich protein 1B                                                         |
| hyaluronoglucosaminidase 2                                                            |
| activin A receptor, type II-like 1                                                    |
| activin A receptor, type II-like 1                                                    |
| activin A receptor, type II-like 1                                                    |
| heat shock factor 1                                                                   |
| Kruppel-like factor 1 (erythroid)                                                     |
| calcium/calmodulin-dependent protein kinase II, beta                                  |
| protein tyrosine phosphatase, receptor type, U                                        |
| synaptosomal-associated protein 91                                                    |
| golgi apparatus protein 1                                                             |
| N-ethylmaleimide sensitive fusion protein attachment protein beta                     |
| RAD50 homolog (S. cerevisiae)                                                         |
| SH2 domain binding protein 1 (tetratricopeptide repeat containing)                    |
| polymerase (RNA) II (DNA directed) polypeptide J                                      |
| ADP-ribosylation factor 6                                                             |
| casein gamma                                                                          |
| RIKEN cDNA 3110043O21 gene                                                            |

|                                                                       |
|-----------------------------------------------------------------------|
| gene model 1673, (NCBI)                                               |
| gene model 1673, (NCBI)                                               |
| lymphoblastomic leukemia                                              |
| lymphoblastomic leukemia                                              |
| nuclear transcription factor-Y alpha                                  |
| mitogen activated protein kinase 10                                   |
| RIKEN cDNA 1110036O03 gene                                            |
| enabled homolog (Drosophila)                                          |
| arrestin, beta 1                                                      |
| ST8 alpha-N-acetyl-neuraminide alpha-2,8-sialyltransferase 2          |
| tripartite motif protein 25                                           |
| integrin binding sialoprotein                                         |
| transmembrane protein 45a                                             |
| DNA methyltransferase 3A                                              |
| procollagen, type XI, alpha 1                                         |
| zinc finger protein 598                                               |
| interferon (alpha and beta) receptor 1                                |
| matrix metallopeptidase 13                                            |
| enhancer of zeste homolog 1 (Drosophila)                              |
| glucosidase, beta, acid                                               |
| phosphodiesterase 7A                                                  |
| solute carrier family 16 (monocarboxylic acid transporters), member 2 |
| adaptor protein complex AP-2, alpha 2 subunit                         |
| hydroxysteroid 11-beta dehydrogenase 2                                |
| fibroblast growth factor 1                                            |
| dishevelled 2, dsh homolog (Drosophila)                               |
| peptidylglycine alpha-amidating monooxygenase                         |
| syntaxin 3                                                            |
| syntaxin 3                                                            |
| syntaxin 3                                                            |
| Fas (TNFRSF6)-associated via death domain                             |
| ATPase, H+/K+ exchanging, beta polypeptide                            |
| phosphodiesterase 1C                                                  |
| Ras-like without CAAX 2                                               |
| nephroblastoma overexpressed gene                                     |
| manic fringe homolog (Drosophila)                                     |
| ring finger protein (C3HC4 type) 19                                   |
| synuclein, beta                                                       |
| histocompatibility (minor) HA-1                                       |
| ubiquitin carboxyl-terminal esterase L5                               |
| development and differentiation enhancing                             |
| guanine nucleotide binding protein, alpha 13                          |
| furin (paired basic amino acid cleaving enzyme)                       |
| choline kinase alpha                                                  |
| ADP-ribosylation factor 2                                             |
| oviductal glycoprotein 1                                              |
| WW domain binding protein 5                                           |
| WW domain binding protein 5                                           |
| HpaII tiny fragments locus 9c                                         |
| a disintegrin and metallopeptidase domain 3 (cyritestin)              |
| coiled-coil domain containing 56                                      |
| ubiquitin-conjugating enzyme E2H                                      |
| ubiquitin-conjugating enzyme E2H                                      |

|                                                                                                                                                                                                                                                                                           |
|-------------------------------------------------------------------------------------------------------------------------------------------------------------------------------------------------------------------------------------------------------------------------------------------|
| ral guanine nucleotide dissociation stimulator                                                                                                                                                                                                                                            |
| cAMP responsive element modulator                                                                                                                                                                                                                                                         |
| translin-associated factor X                                                                                                                                                                                                                                                              |
| RIKEN cDNA E130105L11 gene                                                                                                                                                                                                                                                                |
| myelin-associated oligodendrocytic basic protein                                                                                                                                                                                                                                          |
| RIKEN cDNA 2310016M24 gene                                                                                                                                                                                                                                                                |
| superoxide dismutase 1, soluble                                                                                                                                                                                                                                                           |
| acyl-CoA thioesterase 7                                                                                                                                                                                                                                                                   |
| leukotriene A4 hydrolase                                                                                                                                                                                                                                                                  |
| meprin 1 alpha                                                                                                                                                                                                                                                                            |
| bromodomain containing 7 /// similar to bromodomain containing 7                                                                                                                                                                                                                          |
| bromodomain containing 7 /// similar to bromodomain containing 7                                                                                                                                                                                                                          |
| RNA binding motif protein 4                                                                                                                                                                                                                                                               |
| RIKEN cDNA 4921506I22 gene                                                                                                                                                                                                                                                                |
| phosphoprotein enriched in astrocytes 15                                                                                                                                                                                                                                                  |
| hemoglobin X, alpha-like embryonic chain in Hba complex                                                                                                                                                                                                                                   |
| cytochrome c oxidase, subunit VIc                                                                                                                                                                                                                                                         |
| Cytochrome c oxidase, subunit VIc                                                                                                                                                                                                                                                         |
| interferon gamma receptor 1                                                                                                                                                                                                                                                               |
| tripartite motif protein 27                                                                                                                                                                                                                                                               |
| PDZ and LIM domain 1 (elfin)                                                                                                                                                                                                                                                              |
| Down syndrome critical region homolog 1 (human)                                                                                                                                                                                                                                           |
| Eukaryotic translation initiation factor 4B                                                                                                                                                                                                                                               |
| eukaryotic translation initiation factor 4B                                                                                                                                                                                                                                               |
| eukaryotic translation initiation factor 4B                                                                                                                                                                                                                                               |
| DEAH (Asp-Glu-Ala-His) box polypeptide 16                                                                                                                                                                                                                                                 |
| platelet-activating factor acetylhydrolase, isoform 1b, beta1 subunit                                                                                                                                                                                                                     |
| IQ motif containing GTPase activating protein 1                                                                                                                                                                                                                                           |
| RIKEN cDNA 2400006H24 gene                                                                                                                                                                                                                                                                |
| D-dopachrome tautomerase                                                                                                                                                                                                                                                                  |
| glucosamine-6-phosphate deaminase 1 /// similar to Glucosamine-6-phosphate isomerase (Glucosamine-6-phosphate deaminase) (GNPDA) (GlcN6P deaminase) (Oscillin) /// similar to Glucosamine-6-phosphate isomerase (Glucosamine-6-phosphate deaminase) (GNPDA) (GlcN6P deaminase) (Oscillin) |
| insulin-like growth factor binding protein 5                                                                                                                                                                                                                                              |
| fatty acid binding protein 4, adipocyte                                                                                                                                                                                                                                                   |
| ATP-binding cassette, sub-family E (OABP), member 1                                                                                                                                                                                                                                       |
| annexin A2                                                                                                                                                                                                                                                                                |
| RIKEN cDNA 6330412F12 gene                                                                                                                                                                                                                                                                |
| lysosomal-associated protein transmembrane 4B                                                                                                                                                                                                                                             |
| transmembrane 9 superfamily member 2                                                                                                                                                                                                                                                      |
| glucose phosphate isomerase 1 /// similar to Glucose-6-phosphate isomerase (GPI) (Phosphoglucose isomerase) (PGI) (Phosphohexose isomerase) (PHI) (Neuroleukin) (NLK)                                                                                                                     |
| glucose phosphate isomerase 1                                                                                                                                                                                                                                                             |
| N-acetyltransferase ARD1 homolog (S. cerevisiae)                                                                                                                                                                                                                                          |
| platelet-activating factor acetylhydrolase, isoform 1b, alpha1 subunit                                                                                                                                                                                                                    |
| small nuclear ribonucleoprotein D1                                                                                                                                                                                                                                                        |
| inosine 5'-phosphate dehydrogenase 2                                                                                                                                                                                                                                                      |
| clathrin, light polypeptide (Lca)                                                                                                                                                                                                                                                         |
| Clathrin, light polypeptide (Lca)                                                                                                                                                                                                                                                         |
| cystatin B                                                                                                                                                                                                                                                                                |
| sorting nexin 17                                                                                                                                                                                                                                                                          |
| immunoglobulin heavy chain (J558 family) /// similar to immunoglobulin heavy chain variable region /// similar to immunoglobulin mu-chain /// similar to anti-poly(dC) monoclonal antibody heavy chain                                                                                    |
| annexin A4                                                                                                                                                                                                                                                                                |
| suppressor of Ty 4 homolog 1 (S. cerevisiae) /// suppressor of Ty 4 homolog 2 (S. cerevisiae)                                                                                                                                                                                             |
| RIKEN cDNA 5730403B10 gene                                                                                                                                                                                                                                                                |
| RIKEN cDNA 5730403B10 gene                                                                                                                                                                                                                                                                |



|                                                                                                                                                                                                                                                                                                                                                                                                                                                                                                                                                                                                                                                                                                                                                   |
|---------------------------------------------------------------------------------------------------------------------------------------------------------------------------------------------------------------------------------------------------------------------------------------------------------------------------------------------------------------------------------------------------------------------------------------------------------------------------------------------------------------------------------------------------------------------------------------------------------------------------------------------------------------------------------------------------------------------------------------------------|
| proteasome (prosome, macropain) 28 subunit, beta                                                                                                                                                                                                                                                                                                                                                                                                                                                                                                                                                                                                                                                                                                  |
| Inner membrane protein, mitochondrial                                                                                                                                                                                                                                                                                                                                                                                                                                                                                                                                                                                                                                                                                                             |
| growth hormone inducible transmembrane protein                                                                                                                                                                                                                                                                                                                                                                                                                                                                                                                                                                                                                                                                                                    |
| troponin T2, cardiac                                                                                                                                                                                                                                                                                                                                                                                                                                                                                                                                                                                                                                                                                                                              |
| phosphatidylinositol glycan, class Q                                                                                                                                                                                                                                                                                                                                                                                                                                                                                                                                                                                                                                                                                                              |
| protein tyrosine phosphatase 4a2                                                                                                                                                                                                                                                                                                                                                                                                                                                                                                                                                                                                                                                                                                                  |
| selenium binding protein 1                                                                                                                                                                                                                                                                                                                                                                                                                                                                                                                                                                                                                                                                                                                        |
| glycogenin                                                                                                                                                                                                                                                                                                                                                                                                                                                                                                                                                                                                                                                                                                                                        |
| activating transcription factor 4                                                                                                                                                                                                                                                                                                                                                                                                                                                                                                                                                                                                                                                                                                                 |
| CD24a antigen                                                                                                                                                                                                                                                                                                                                                                                                                                                                                                                                                                                                                                                                                                                                     |
| integrin beta 5                                                                                                                                                                                                                                                                                                                                                                                                                                                                                                                                                                                                                                                                                                                                   |
| ribosomal protein S15                                                                                                                                                                                                                                                                                                                                                                                                                                                                                                                                                                                                                                                                                                                             |
| dynein cytoplasmic 1 intermediate chain 2                                                                                                                                                                                                                                                                                                                                                                                                                                                                                                                                                                                                                                                                                                         |
| tropomyosin 2, beta                                                                                                                                                                                                                                                                                                                                                                                                                                                                                                                                                                                                                                                                                                                               |
| prion protein                                                                                                                                                                                                                                                                                                                                                                                                                                                                                                                                                                                                                                                                                                                                     |
| phospholipase D family, member 3                                                                                                                                                                                                                                                                                                                                                                                                                                                                                                                                                                                                                                                                                                                  |
| serine palmitoyltransferase, long chain base subunit 1                                                                                                                                                                                                                                                                                                                                                                                                                                                                                                                                                                                                                                                                                            |
| complement factor B                                                                                                                                                                                                                                                                                                                                                                                                                                                                                                                                                                                                                                                                                                                               |
| calpain, small subunit 1                                                                                                                                                                                                                                                                                                                                                                                                                                                                                                                                                                                                                                                                                                                          |
| lysozyme                                                                                                                                                                                                                                                                                                                                                                                                                                                                                                                                                                                                                                                                                                                                          |
| ribonucleotide reductase M1                                                                                                                                                                                                                                                                                                                                                                                                                                                                                                                                                                                                                                                                                                                       |
| FK506 binding protein 8                                                                                                                                                                                                                                                                                                                                                                                                                                                                                                                                                                                                                                                                                                                           |
| myoglobin                                                                                                                                                                                                                                                                                                                                                                                                                                                                                                                                                                                                                                                                                                                                         |
| ---                                                                                                                                                                                                                                                                                                                                                                                                                                                                                                                                                                                                                                                                                                                                               |
| centromere autoantigen A                                                                                                                                                                                                                                                                                                                                                                                                                                                                                                                                                                                                                                                                                                                          |
| solute carrier family 25 (mitochondrial carrier, adenine nucleotide translocator), member 5 /// similar to ADP/ATP translocase 2 (Adenine nucleotide translocator 2) (ANT 2) (ADP,ATP carrier protein 2) (Solute carrier family 25 member 5) /// similar to ADP/ATP translocase 2 (Adenine nucleotide translocator 2) (ANT 2) (ADP,ATP carrier protein 2) (Solute carrier family 25 member 5) /// similar to ADP/ATP translocase 2 (Adenine nucleotide translocator 2) (ANT 2) (ADP,ATP carrier protein 2) (Solute carrier family 25 member 5) /// similar to ADP/ATP translocase 2 (Adenine nucleotide translocator 2) (ANT 2) (ADP,ATP carrier protein 2) (Solute carrier family 25 member 5) /// similar to solute carrier family 25, member 5 |
| solute carrier family 25 (mitochondrial carrier, adenine nucleotide translocator), member 5 /// similar to ADP/ATP translocase 2 (Adenine nucleotide translocator 2) (ANT 2) (ADP,ATP carrier protein 2) (Solute carrier family 25 member 5) /// similar to ADP/ATP translocase 2 (Adenine nucleotide translocator 2) (ANT 2) (ADP,ATP carrier protein 2) (Solute carrier family 25 member 5) /// similar to ADP/ATP translocase 2 (Adenine nucleotide translocator 2) (ANT 2) (ADP,ATP carrier protein 2) (Solute carrier family 25 member 5) /// similar to solute carrier family 25, member 5 /// similar to solute carrier family 25, member 5                                                                                                |
| solute carrier family 25 (mitochondrial carrier, adenine nucleotide translocator), member 5 /// similar to ADP/ATP translocase 2 (Adenine nucleotide translocator 2) (ANT 2) (ADP,ATP carrier protein 2) (Solute carrier family 25 member 5) /// similar to ADP/ATP translocase 2 (Adenine nucleotide translocator 2) (ANT 2) (ADP,ATP carrier protein 2) (Solute carrier family 25 member 5) /// similar to ADP/ATP translocase 2 (Adenine nucleotide translocator 2) (ANT 2) (ADP,ATP carrier protein 2) (Solute carrier family 25 member 5) /// similar to solute carrier family 25, member 5 /// similar to solute carrier family 25, member 5                                                                                                |
| 4-hydroxyphenylpyruvic acid dioxygenase                                                                                                                                                                                                                                                                                                                                                                                                                                                                                                                                                                                                                                                                                                           |
| ribonuclease/angiogenin inhibitor 1                                                                                                                                                                                                                                                                                                                                                                                                                                                                                                                                                                                                                                                                                                               |
| peroxiredoxin 6                                                                                                                                                                                                                                                                                                                                                                                                                                                                                                                                                                                                                                                                                                                                   |
| chloride channel calcium activated 3                                                                                                                                                                                                                                                                                                                                                                                                                                                                                                                                                                                                                                                                                                              |
| outer dense fiber of sperm tails 2                                                                                                                                                                                                                                                                                                                                                                                                                                                                                                                                                                                                                                                                                                                |
| NADH dehydrogenase (ubiquinone) 1, subcomplex unknown, 1                                                                                                                                                                                                                                                                                                                                                                                                                                                                                                                                                                                                                                                                                          |
| glutathione S-transferase, mu 5                                                                                                                                                                                                                                                                                                                                                                                                                                                                                                                                                                                                                                                                                                                   |
| glutathione S-transferase, mu 5                                                                                                                                                                                                                                                                                                                                                                                                                                                                                                                                                                                                                                                                                                                   |
| Glutathione S-transferase, mu 5                                                                                                                                                                                                                                                                                                                                                                                                                                                                                                                                                                                                                                                                                                                   |
| protein kinase, AMP-activated, gamma 1 non-catalytic subunit                                                                                                                                                                                                                                                                                                                                                                                                                                                                                                                                                                                                                                                                                      |
| MOCO sulphurase C-terminal domain containing 2                                                                                                                                                                                                                                                                                                                                                                                                                                                                                                                                                                                                                                                                                                    |
| retinol dehydrogenase 7                                                                                                                                                                                                                                                                                                                                                                                                                                                                                                                                                                                                                                                                                                                           |
| SAR1 gene homolog A (S. cerevisiae)                                                                                                                                                                                                                                                                                                                                                                                                                                                                                                                                                                                                                                                                                                               |
| eukaryotic translation initiation factor 4E binding protein 1                                                                                                                                                                                                                                                                                                                                                                                                                                                                                                                                                                                                                                                                                     |
| ---                                                                                                                                                                                                                                                                                                                                                                                                                                                                                                                                                                                                                                                                                                                                               |
| similar to sodium channel 25                                                                                                                                                                                                                                                                                                                                                                                                                                                                                                                                                                                                                                                                                                                      |
| interferon alpha family, gene 11                                                                                                                                                                                                                                                                                                                                                                                                                                                                                                                                                                                                                                                                                                                  |
| myosin Va                                                                                                                                                                                                                                                                                                                                                                                                                                                                                                                                                                                                                                                                                                                                         |
| killer cell lectin-like receptor, subfamily A, member 5                                                                                                                                                                                                                                                                                                                                                                                                                                                                                                                                                                                                                                                                                           |

[illegible]

|                                                                                                                                      |
|--------------------------------------------------------------------------------------------------------------------------------------|
| chain V region 145 precursor /// similar to Ig heavy chain V region 102 precursor /// similar to Ig heavy chain V region 3 precursor |
| ---                                                                                                                                  |
| small proline-rich protein 2E                                                                                                        |
| zinc finger protein 28                                                                                                               |
| NAD(P)H dehydrogenase, quinone 1                                                                                                     |
| glutamate receptor, ionotropic, NMDA2A (epsilon 1)                                                                                   |
| ribosomal protein L28                                                                                                                |
| multiple PDZ domain protein                                                                                                          |
| ribosomal protein L26                                                                                                                |
| CD180 antigen                                                                                                                        |
| proline-rich protein 15                                                                                                              |
| ribosomal protein S8                                                                                                                 |
| proteasome (prosome, macropain) subunit, alpha type 2                                                                                |
| ribosomal protein L3                                                                                                                 |
| keratin associated protein 6-3                                                                                                       |
| BarH-like homeobox 2                                                                                                                 |
| one cut domain, family member 1                                                                                                      |
| serine protease inhibitor 15                                                                                                         |
| serine protease inhibitor 16                                                                                                         |
| glycoprotein 5 (platelet)                                                                                                            |
| formyl peptide receptor-like 1                                                                                                       |
| expressed sequence AA409749                                                                                                          |
| RIKEN cDNA D030070L09 gene                                                                                                           |
| RIKEN cDNA 6820424L24 gene                                                                                                           |
| expressed sequence AA408156                                                                                                          |
| Transcribed locus                                                                                                                    |
| expressed sequence AA408954                                                                                                          |
| DNA segment, Chr 10, Wayne State University 159, expressed                                                                           |
| zinc finger and BTB domain containing 37                                                                                             |
| expressed sequence AA414903                                                                                                          |
| a disintegrin and metallopeptidase domain 10                                                                                         |
| retinal pigment epithelium derived rhodopsin homolog                                                                                 |
| ATP synthase, H+ transporting, mitochondrial F1 complex, alpha subunit, isoform 1                                                    |
| ecotropic viral integration site 1                                                                                                   |
| elastase 2, neutrophil                                                                                                               |
| thymidylate synthase, pseudogene                                                                                                     |
| calcium channel, voltage-dependent, beta 2 subunit                                                                                   |
| ribosomal protein S28                                                                                                                |
| mannose receptor, C type 2                                                                                                           |
| desmocollin 1                                                                                                                        |
| striatin, calmodulin binding protein                                                                                                 |
| sema domain, transmembrane domain (TM), and cytoplasmic domain, (semaphorin) 6A                                                      |
| DNA segment, Chr 2, ERATO Doi 127, expressed                                                                                         |
| interleukin 2 receptor, beta chain                                                                                                   |
| fibronectin type III domain containing 7                                                                                             |
| endothelin 3                                                                                                                         |
| Glucosamine-phosphate N-acetyltransferase 1                                                                                          |
| ---                                                                                                                                  |
| ---                                                                                                                                  |
| B-cell linker                                                                                                                        |
| B-cell linker                                                                                                                        |
| interleukin 12a                                                                                                                      |
| DNA segment, Chr 12, Wayne State University 118, expressed                                                                           |

|                                                                                                                                                                       |
|-----------------------------------------------------------------------------------------------------------------------------------------------------------------------|
| ---                                                                                                                                                                   |
| RIKEN cDNA 6030490I01 gene                                                                                                                                            |
| CD38 antigen                                                                                                                                                          |
| interleukin 12b                                                                                                                                                       |
| ribosomal protein S4, X-linked                                                                                                                                        |
| myosin, light polypeptide 4                                                                                                                                           |
| ---                                                                                                                                                                   |
| fasciculation and elongation protein zeta 1 (zygin I)                                                                                                                 |
| RIKEN cDNA 1810058I24 gene                                                                                                                                            |
| striatin, calmodulin binding protein 3                                                                                                                                |
| actinin alpha 3                                                                                                                                                       |
| RIKEN cDNA 9830147J24 gene                                                                                                                                            |
| defensin beta 1                                                                                                                                                       |
| ADP-ribosylation factor 4-like                                                                                                                                        |
| aldo-keto reductase family 1, member B8                                                                                                                               |
| NIMA (never in mitosis gene a)-related expressed kinase 2                                                                                                             |
| mitochondrial ribosomal protein L45                                                                                                                                   |
| SMC6 structural maintenance of chromosomes 6-like 1 (yeast)                                                                                                           |
| sortilin-related receptor, LDLR class A repeats-containing                                                                                                            |
| sterile alpha motif domain containing 4B                                                                                                                              |
| chromatin assembly factor 1, subunit B (p60)                                                                                                                          |
| sperm mitochondria-associated cysteine-rich protein                                                                                                                   |
| NADH dehydrogenase (ubiquinone) 1 alpha subcomplex, assembly factor 1                                                                                                 |
| serine palmitoyltransferase, long chain base subunit 2                                                                                                                |
| origin recognition complex, subunit 5-like (S. cerevisiae)                                                                                                            |
| large subunit GTPase 1 homolog (S. cerevisiae)                                                                                                                        |
| calcium channel, voltage-dependent, gamma subunit 1                                                                                                                   |
| TAP binding protein                                                                                                                                                   |
| TAP binding protein                                                                                                                                                   |
| zinc finger and BTB domain containing 22                                                                                                                              |
| host cell factor C1                                                                                                                                                   |
| host cell factor C1                                                                                                                                                   |
| RIKEN cDNA 2610019F03 gene                                                                                                                                            |
| poly (ADP-ribose) polymerase family, member 2                                                                                                                         |
| DNA segment, Chr 14, ERATO Doi 209, expressed                                                                                                                         |
| hect domain and RLD 4                                                                                                                                                 |
| integrin beta 7                                                                                                                                                       |
| potassium voltage-gated channel, Isk-related family, member 1-like                                                                                                    |
| protein tyrosine phosphatase, receptor type, A                                                                                                                        |
| protease, serine, 8 (prostasin)                                                                                                                                       |
| surfeit gene 2                                                                                                                                                        |
| GPI anchor attachment protein 1                                                                                                                                       |
| DPH5 homolog (S. cerevisiae)                                                                                                                                          |
| cDNA sequence BC026682                                                                                                                                                |
| PREDICTED: Mus musculus similar to Rap guanine nucleotide exchange factor 2 (PDZ domain containing guanine nucleotide exchange factor 1) (PDZ-GEF1) (LOC620996), mRNA |
| myosin, heavy polypeptide 9, non-muscle                                                                                                                               |
| solute carrier family 22 (organic cation transporter), member 1                                                                                                       |
| WD repeat domain 55                                                                                                                                                   |
| ---                                                                                                                                                                   |
| troponin I, cardiac                                                                                                                                                   |
| myosin X                                                                                                                                                              |
| GATA binding protein 3                                                                                                                                                |
| RIKEN cDNA 2700089E24 gene                                                                                                                                            |

|                                                                              |
|------------------------------------------------------------------------------|
| ---                                                                          |
| phospholipid transfer protein                                                |
| fibulin 2                                                                    |
| myotubularin related protein 9                                               |
| arylsulfatase A                                                              |
| calpain 1                                                                    |
| syntaxin 1A (brain)                                                          |
| MAX-like protein X                                                           |
| growth hormone releasing hormone                                             |
| zinc finger protein 282                                                      |
| protein inhibitor of activated STAT 2                                        |
| solute carrier family 1 (glutamate/neutral amino acid transporter), member 4 |
| expressed sequence AW112010                                                  |
| heat shock protein 1B                                                        |
| CDNA clone IMAGE:1265020                                                     |
| progressive ankylosis                                                        |
| cDNA sequence BC004044                                                       |
| polycystic kidney disease 2                                                  |
| stromal interaction molecule 1                                               |
| timeless homolog (Drosophila)                                                |
| HIV-1 Rev binding protein                                                    |
| ubiquitin-conjugating enzyme E2T (putative)                                  |
| klotho                                                                       |
| single-stranded DNA binding protein 1                                        |
| spermatogenesis associated 13                                                |
| S100 calcium binding protein A13                                             |
| S100 calcium binding protein A13                                             |
| potassium voltage-gated channel, subfamily H (eag-related), member 2         |
| Ngfi-A binding protein 2                                                     |
| paroxysmal nonkinesigenic dyskinesia                                         |
| vesicle transport through interaction with t-SNAREs 1B homolog               |
| cytochrome c oxidase, subunit VIIIc                                          |
| serine (or cysteine) peptidase inhibitor, clade D, member 1                  |
| solute carrier family 27 (fatty acid transporter), member 2                  |
| cleavage stimulation factor, 3' pre-RNA, subunit 3                           |
| thymoma viral proto-oncogene 1                                               |
| TEA domain family member 3                                                   |
| chemokine (C-C motif) ligand 27                                              |
| chemokine (C-C motif) ligand 27                                              |
| single stranded DNA binding protein 4                                        |
| Single stranded DNA binding protein 4                                        |
| protein tyrosine phosphatase, non-receptor type 9                            |
| pyruvate dehydrogenase kinase, isoenzyme 1                                   |
| FSHD region gene 1                                                           |
| ring finger protein 138                                                      |
| Rho-associated coiled-coil forming kinase 1                                  |
| interferon-induced protein with tetratricopeptide repeats 1                  |
| potassium channel tetramerisation domain containing 9                        |
| prolyl endopeptidase                                                         |
| activating transcription factor 1                                            |
| seven in absentia 1A                                                         |
| four and a half LIM domains 2                                                |
| RIKEN cDNA 1500019G21 gene                                                   |

|                                                                                                                                                                                                            |
|------------------------------------------------------------------------------------------------------------------------------------------------------------------------------------------------------------|
| BCL2-like 11 (apoptosis facilitator)                                                                                                                                                                       |
| integrin beta 1 binding protein 1                                                                                                                                                                          |
| integrin beta 1 binding protein 1                                                                                                                                                                          |
| integrin beta 1 binding protein 1                                                                                                                                                                          |
| polyhomeotic-like 1 (Drosophila)                                                                                                                                                                           |
| apoptosis-associated tyrosine kinase                                                                                                                                                                       |
| CDKN1A interacting zinc finger protein 1                                                                                                                                                                   |
| 1-acylglycerol-3-phosphate O-acyltransferase 6 (lysophosphatidic acid acyltransferase, zeta)                                                                                                               |
| desmin                                                                                                                                                                                                     |
| histocompatibility 2, class II antigen A, beta 1                                                                                                                                                           |
| ornithine decarboxylase antizyme 2                                                                                                                                                                         |
| G protein-coupled receptor 177                                                                                                                                                                             |
| antizyme inhibitor 1                                                                                                                                                                                       |
| splicing factor, arginine/serine-rich 3 (SRp20)                                                                                                                                                            |
| splicing factor, arginine/serine-rich 3 (SRp20)                                                                                                                                                            |
| acetyl-Coenzyme A acetyltransferase 2                                                                                                                                                                      |
| MAP kinase-interacting serine/threonine kinase 2                                                                                                                                                           |
| transcription elongation regulator 1 (CA150)                                                                                                                                                               |
| keratin complex 2, basic, gene 8                                                                                                                                                                           |
| MYB binding protein (P160) 1a                                                                                                                                                                              |
| chaperonin subunit 4 (delta)                                                                                                                                                                               |
| ornithine decarboxylase antizyme                                                                                                                                                                           |
| interferon (alpha and beta) receptor 2                                                                                                                                                                     |
| interferon (alpha and beta) receptor 2                                                                                                                                                                     |
| ADP-ribosylation factor 1                                                                                                                                                                                  |
| cyclin-dependent kinase 4                                                                                                                                                                                  |
| cathepsin C                                                                                                                                                                                                |
| cathepsin C                                                                                                                                                                                                |
| splicing factor, arginine/serine-rich 1 (ASF/SF2)                                                                                                                                                          |
| RIKEN cDNA 0610010E21 gene                                                                                                                                                                                 |
| small proline-rich protein 2A                                                                                                                                                                              |
| small proline-rich protein 2A                                                                                                                                                                              |
| pituitary tumor-transforming 1                                                                                                                                                                             |
| pituitary tumor-transforming 1                                                                                                                                                                             |
| actin, alpha, cardiac                                                                                                                                                                                      |
| actin, alpha, cardiac                                                                                                                                                                                      |
| ras homolog gene family, member B                                                                                                                                                                          |
| surfeit gene 1                                                                                                                                                                                             |
| nuclear distribution gene C homolog (Aspergillus)                                                                                                                                                          |
| growth factor receptor bound protein 2                                                                                                                                                                     |
| apoptosis inhibitor 5                                                                                                                                                                                      |
| translocase of outer mitochondrial membrane 20 homolog (yeast) /// similar to translocase of outer mitochondrial membrane 20 homolog /// similar to translocase of outer mitochondrial membrane 20 homolog |
| abl-interactor 1                                                                                                                                                                                           |
| procollagen, type IV, alpha 2                                                                                                                                                                              |
| calpain 2                                                                                                                                                                                                  |
| keratin complex 1, acidic, gene 14                                                                                                                                                                         |
| peptidase D                                                                                                                                                                                                |
| trypsin 4 /// RIKEN cDNA 1810049H19 gene                                                                                                                                                                   |
| aminolevulinate, delta-, dehydratase                                                                                                                                                                       |
| hydroxyacyl-Coenzyme A dehydrogenase type II                                                                                                                                                               |
| vimentin                                                                                                                                                                                                   |
| CD99 antigen                                                                                                                                                                                               |
| protein tyrosine phosphatase, receptor type, C                                                                                                                                                             |

|                                                                                                                                                                                                                                                                                                                                                                                                                                                                                       |
|---------------------------------------------------------------------------------------------------------------------------------------------------------------------------------------------------------------------------------------------------------------------------------------------------------------------------------------------------------------------------------------------------------------------------------------------------------------------------------------|
| small nucleolar RNA, H/ACA box 65 /// ribosomal protein L12 /// similar to 60S ribosomal protein L12 |
| riboflavin kinase                                                                                                                                                                                                                                                                                                                                                                                                                                                                     |
| S100 calcium binding protein A3                                                                                                                                                                                                                                                                                                                                                                                                                                                       |
| S100 calcium binding protein A3                                                                                                                                                                                                                                                                                                                                                                                                                                                       |
| PRP6 pre-mRNA splicing factor 6 homolog (yeast)                                                                                                                                                                                                                                                                                                                                                                                                                                       |
| CD74 antigen (invariant polypeptide of major histocompatibility complex, class II antigen-associated)                                                                                                                                                                                                                                                                                                                                                                                 |
| protective protein for beta-galactosidase                                                                                                                                                                                                                                                                                                                                                                                                                                             |
| radixin                                                                                                                                                                                                                                                                                                                                                                                                                                                                               |
| RIKEN cDNA A430005L14 gene                                                                                                                                                                                                                                                                                                                                                                                                                                                            |
| amylase 1, salivary                                                                                                                                                                                                                                                                                                                                                                                                                                                                   |
| necdin                                                                                                                                                                                                                                                                                                                                                                                                                                                                                |
| protein disulfide isomerase associated 3                                                                                                                                                                                                                                                                                                                                                                                                                                              |
| signal sequence receptor, beta                                                                                                                                                                                                                                                                                                                                                                                                                                                        |
| heme oxygenase (decycling) 2                                                                                                                                                                                                                                                                                                                                                                                                                                                          |
| troponin C, cardiac/slow skeletal                                                                                                                                                                                                                                                                                                                                                                                                                                                     |
| pleiotropic regulator 1, PRL1 homolog (Arabidopsis)                                                                                                                                                                                                                                                                                                                                                                                                                                   |
| proliferating cell nuclear antigen                                                                                                                                                                                                                                                                                                                                                                                                                                                    |
| mitochondrial ribosomal protein L24                                                                                                                                                                                                                                                                                                                                                                                                                                                   |
| makorin, ring finger protein, 1                                                                                                                                                                                                                                                                                                                                                                                                                                                       |
| makorin, ring finger protein, 1                                                                                                                                                                                                                                                                                                                                                                                                                                                       |
| makorin, ring finger protein, 1                                                                                                                                                                                                                                                                                                                                                                                                                                                       |
| myosin, heavy polypeptide 6, cardiac muscle, alpha                                                                                                                                                                                                                                                                                                                                                                                                                                    |
| eukaryotic translation initiation factor 4E binding protein 2                                                                                                                                                                                                                                                                                                                                                                                                                         |
| low density lipoprotein receptor-related protein 1                                                                                                                                                                                                                                                                                                                                                                                                                                    |
| dolichyl-di-phosphooligosaccharide-protein glycotransferase                                                                                                                                                                                                                                                                                                                                                                                                                           |
| anterior gradient 2 (Xenopus laevis)                                                                                                                                                                                                                                                                                                                                                                                                                                                  |
| anterior gradient 2 (Xenopus laevis)                                                                                                                                                                                                                                                                                                                                                                                                                                                  |
| solute carrier family 4 (anion exchanger), member 1                                                                                                                                                                                                                                                                                                                                                                                                                                   |
| basigin                                                                                                                                                                                                                                                                                                                                                                                                                                                                               |
| nuclear RNA export factor 1 homolog (S. cerevisiae)                                                                                                                                                                                                                                                                                                                                                                                                                                   |
| Procollagen, type V, alpha 1                                                                                                                                                                                                                                                                                                                                                                                                                                                          |
| C-terminal binding protein 1                                                                                                                                                                                                                                                                                                                                                                                                                                                          |
| similar to NADP-dependent malic enzyme (NADP-ME) (Malic enzyme 1)                                                                                                                                                                                                                                                                                                                                                                                                                     |
| LSM2 homolog, U6 small nuclear RNA associated (S. cerevisiae)                                                                                                                                                                                                                                                                                                                                                                                                                         |
| dolichyl-phosphate mannosyltransferase polypeptide 3                                                                                                                                                                                                                                                                                                                                                                                                                                  |
| mitochondrial ribosomal protein S24                                                                                                                                                                                                                                                                                                                                                                                                                                                   |
| cellular nucleic acid binding protein 1                                                                                                                                                                                                                                                                                                                                                                                                                                               |
| cellular nucleic acid binding protein 1                                                                                                                                                                                                                                                                                                                                                                                                                                               |
| cellular nucleic acid binding protein 1                                                                                                                                                                                                                                                                                                                                                                                                                                               |
| PDZ and LIM domain 3                                                                                                                                                                                                                                                                                                                                                                                                                                                                  |
| fibrillin 1                                                                                                                                                                                                                                                                                                                                                                                                                                                                           |
| SMT3 suppressor of mif two 3 homolog 1 (yeast)                                                                                                                                                                                                                                                                                                                                                                                                                                        |
| procollagen, type IV, alpha 1                                                                                                                                                                                                                                                                                                                                                                                                                                                         |
| HIG1 domain family, member 1A                                                                                                                                                                                                                                                                                                                                                                                                                                                         |
| microfibrillar-associated protein 2                                                                                                                                                                                                                                                                                                                                                                                                                                                   |
| HCLS1 associated X-1                                                                                                                                                                                                                                                                                                                                                                                                                                                                  |
| mitochondrial ribosomal protein L21                                                                                                                                                                                                                                                                                                                                                                                                                                                   |
| neuron specific gene family member 1                                                                                                                                                                                                                                                                                                                                                                                                                                                  |
| protein phosphatase 2 (formerly 2A), catalytic subunit, beta isoform                                                                                                                                                                                                                                                                                                                                                                                                                  |
| immunoglobulin (CD79A) binding protein 1                                                                                                                                                                                                                                                                                                                                                                                                                                              |
| cytochrome P450, family 4, subfamily a, polypeptide 14                                                                                                                                                                                                                                                                                                                                                                                                                                |

|                                                                                                                               |
|-------------------------------------------------------------------------------------------------------------------------------|
| Down syndrome critical region gene 3                                                                                          |
| barrier to autointegration factor 1                                                                                           |
| RIKEN cDNA E430034L04 gene                                                                                                    |
| calumenin                                                                                                                     |
| nuclear autoantigenic sperm protein (histone-binding)                                                                         |
| dystroglycan 1                                                                                                                |
| procollagen, type VI, alpha 3 /// similar to alpha 3 type VI collagen isoform 1 precursor                                     |
| ras homolog gene family, member A                                                                                             |
| ras homolog gene family, member A /// similar to aplysia ras-related homolog A2 /// similar to aplysia ras-related homolog A2 |
| ras homolog gene family, member A                                                                                             |
| signal recognition particle receptor, B subunit                                                                               |
| lactotransferrin                                                                                                              |
| Phosphatidylinositol-4-phosphate 5-kinase, type II, alpha                                                                     |
| expressed sequence AA511261                                                                                                   |
| DNA segment, Chr 12, ERATO Doi 551, expressed                                                                                 |
| ---                                                                                                                           |
| Calpain 2                                                                                                                     |
| Transcribed locus                                                                                                             |
| Eph receptor A6                                                                                                               |
| integral membrane protein 2B                                                                                                  |
| Transcribed locus                                                                                                             |
| Hypoxia up-regulated 1                                                                                                        |
| PREDICTED: Mus musculus hypothetical protein LOC628408 (LOC628408), mRNA                                                      |
| C. elegans ceh-10 homeo domain containing homolog                                                                             |
| calcium channel, voltage-dependent, L type, alpha 1S subunit                                                                  |
| ribosomal protein L5                                                                                                          |
| procollagen, type I, alpha 2                                                                                                  |
| cholinergic receptor, nicotinic, alpha polypeptide 7                                                                          |
| sodium channel, voltage-gated, type VII, alpha                                                                                |
| lipocalin 3                                                                                                                   |
| granule cell antiserum positive 8                                                                                             |
| calcitonin receptor                                                                                                           |
| tumor necrosis factor (ligand) superfamily, member 8                                                                          |
| ribosomal protein S3                                                                                                          |
| gamma-aminobutyric acid (GABA-A) receptor, subunit beta 2                                                                     |
| mucin 10, submandibular gland salivary mucin                                                                                  |
| 5-hydroxytryptamine (serotonin) receptor 1A                                                                                   |
| ---                                                                                                                           |
| frizzled homolog 6 (Drosophila)                                                                                               |
| frizzled homolog 7 (Drosophila)                                                                                               |
| interleukin 18 receptor 1                                                                                                     |
| centrosomal protein 250                                                                                                       |
| genomic screened homeo box 1                                                                                                  |
| germinal center expressed transcript 2                                                                                        |
| protein kinase C, iota                                                                                                        |
| src homology 2 domain-containing transforming protein C3                                                                      |
| ets variant gene 2                                                                                                            |
| recoverin                                                                                                                     |
| 5-hydroxytryptamine (serotonin) receptor 5A                                                                                   |
| oncofetal antigen                                                                                                             |
| expressed sequence AA517023                                                                                                   |
| heat shock factor 2                                                                                                           |
| neoplastic progression 2                                                                                                      |



|                                                                                        |
|----------------------------------------------------------------------------------------|
| Immunoglobulin heavy chain 1a (serum IgG2a)                                            |
| zinc finger protein 2                                                                  |
| microphthalmia-associated transcription factor                                         |
| chemokine (C-X-C motif) ligand 2                                                       |
| melanocortin 1 receptor                                                                |
| myogenic factor 5                                                                      |
| recombination activating gene 2                                                        |
| tumor necrosis factor (ligand) superfamily, member 4                                   |
| ---                                                                                    |
| zinc finger and SCAN domain containing 2                                               |
| ---                                                                                    |
| dynamin 3, opposite strand                                                             |
| retinal degeneration, slow (retinitis pigmentosa 7)                                    |
| 5-hydroxytryptamine (serotonin) receptor 1F                                            |
| dishevelled 3, dsh homolog (Drosophila)                                                |
| zinc finger protein 92                                                                 |
| phosphatidylcholine transfer protein                                                   |
| oncomodulin                                                                            |
| mitogen activated protein kinase kinase kinase 2                                       |
| lipocalin 4                                                                            |
| activin A receptor, type 1B                                                            |
| sema domain, immunoglobulin domain (Ig), short basic domain, secreted, (semaphorin) 3C |
| ---                                                                                    |
| ataxia telangiectasia mutated homolog (human)                                          |
| cyclic nucleotide gated channel alpha 2                                                |
| GLI-Kruppel family member GLI3                                                         |
| synaptotagmin II                                                                       |
| hydroxysteroid (17-beta) dehydrogenase 3                                               |
| forkhead box L1                                                                        |
| per-pentamer repeat gene                                                               |
| serine (or cysteine) peptidase inhibitor, clade A, member 5                            |
| potassium inwardly-rectifying channel, subfamily J, member 3                           |
| harakiri, BCL2 interacting protein (contains only BH3 domain)                          |
| melatonin receptor 1A                                                                  |
| double C2, beta                                                                        |
| LIM homeobox protein 5                                                                 |
| zinc finger protein interacting with K protein 1                                       |
| stimulated by retinoic acid gene 8                                                     |
| myosin light chain 2, precursor lymphocyte-specific                                    |
| proprotein convertase subtilisin/kexin type 6                                          |
| glutamine repeat protein 1                                                             |
| complexin 1                                                                            |
| chemokine-like receptor 1                                                              |
| cytochrome P450, family 19, subfamily a, polypeptide 1                                 |
| ---                                                                                    |
| ---                                                                                    |
| serine/arginine repetitive matrix 2                                                    |
| ---                                                                                    |
| Transcribed locus                                                                      |
| expressed sequence T25656                                                              |
| peptidylprolyl isomerase A                                                             |
| solute carrier family 7 (cationic amino acid transporter, y+ system), member 1         |
| Fc receptor, IgE, high affinity I, alpha polypeptide                                   |

|                                                                                                                                                                                                                                                                                                                           |
|---------------------------------------------------------------------------------------------------------------------------------------------------------------------------------------------------------------------------------------------------------------------------------------------------------------------------|
| zinc finger protein 651                                                                                                                                                                                                                                                                                                   |
| DNA segment, Chr 7, Brigham & Women's Genetics 0826 expressed                                                                                                                                                                                                                                                             |
| ribosomal protein S7                                                                                                                                                                                                                                                                                                      |
| acidic ribosomal phosphoprotein P0                                                                                                                                                                                                                                                                                        |
| similar to glyceraldehyde-3-phosphate dehydrogenase /// similar to glyceraldehyde-3-phosphate dehydrogenase /// cDNA sequence AK190093 /// glyceraldehyde-3-phosphate dehydrogenase /// glyceraldehyde-3-phosphate dehydrogenase pseudogene                                                                               |
| gamma-aminobutyric acid (GABA-A) receptor, subunit alpha 2                                                                                                                                                                                                                                                                |
| Transcribed locus                                                                                                                                                                                                                                                                                                         |
| ---                                                                                                                                                                                                                                                                                                                       |
| DNA segment, Chr 7, ERATO Doi 1, expressed                                                                                                                                                                                                                                                                                |
| Transcribed locus                                                                                                                                                                                                                                                                                                         |
| expressed sequence C76628                                                                                                                                                                                                                                                                                                 |
| RAB3A interacting protein (rabin3)-like 1                                                                                                                                                                                                                                                                                 |
| RIKEN cDNA 1810054D07 gene                                                                                                                                                                                                                                                                                                |
| ---                                                                                                                                                                                                                                                                                                                       |
| DNA segment, Chr 8, ERATO Doi 107, expressed                                                                                                                                                                                                                                                                              |
| DNA segment, Chr 5, ERATO Doi 102, expressed                                                                                                                                                                                                                                                                              |
| SH3 domain containing ring finger 1                                                                                                                                                                                                                                                                                       |
| Transcribed locus                                                                                                                                                                                                                                                                                                         |
| budding uninhibited by benzimidazoles 3 homolog (S. cerevisiae)                                                                                                                                                                                                                                                           |
| expressed sequence C78228                                                                                                                                                                                                                                                                                                 |
| eukaryotic translation initiation factor 4E nuclear import factor 1                                                                                                                                                                                                                                                       |
| 5'-3' exoribonuclease 1                                                                                                                                                                                                                                                                                                   |
| expressed sequence C78532                                                                                                                                                                                                                                                                                                 |
| ---                                                                                                                                                                                                                                                                                                                       |
| expressed sequence C78704                                                                                                                                                                                                                                                                                                 |
| Expressed sequence AI450241                                                                                                                                                                                                                                                                                               |
| RAN, member RAS oncogene family /// similar to RAN, member RAS oncogene family /// similar to RAN, member RAS oncogene family                                                                                                                                                                                             |
| ubiquitin B                                                                                                                                                                                                                                                                                                               |
| similar to Ig heavy chain V region 441 precursor /// similar to Ig heavy chain V region 441 precursor /// similar to Ig heavy chain V region 441 precursor /// similar to Ig heavy chain V region 441 precursor /// similar to Ig heavy chain V region 441 precursor /// similar to Ig heavy chain V region 441 precursor |
| DNA segment, Chr 17, human D6S56E 3                                                                                                                                                                                                                                                                                       |
| artemin                                                                                                                                                                                                                                                                                                                   |
| gene model 1066, (NCBI)                                                                                                                                                                                                                                                                                                   |
| olfactory receptor 2                                                                                                                                                                                                                                                                                                      |
| olfactory receptor 49                                                                                                                                                                                                                                                                                                     |
| G protein-coupled receptor 44                                                                                                                                                                                                                                                                                             |
| gap junction membrane channel protein alpha 8                                                                                                                                                                                                                                                                             |
| cytochrome P450, family 2, subfamily d, polypeptide 10 /// similar to Cytochrome P450 2D11 (CYP11D11) (P450-16-alpha) (CC) (Testosterone 16-alpha hydroxylase)                                                                                                                                                            |
| Friend virus susceptibility 4                                                                                                                                                                                                                                                                                             |
| kallikrein 1-related peptidase b22                                                                                                                                                                                                                                                                                        |
| gonadotropin releasing hormone 1                                                                                                                                                                                                                                                                                          |
| similar to Spermidine synthase (Putrescine aminopropyltransferase) (SPDSY)                                                                                                                                                                                                                                                |
| ---                                                                                                                                                                                                                                                                                                                       |
| glucose-6-phosphate dehydrogenase 2                                                                                                                                                                                                                                                                                       |
| glucose-6-phosphate dehydrogenase 2 /// glucose-6-phosphate dehydrogenase X-linked                                                                                                                                                                                                                                        |
| chloride channel, nucleotide-sensitive, 1A /// hypothetical LOC241715                                                                                                                                                                                                                                                     |
| similar to odorant binding protein 1a /// similar to odorant binding protein 1a /// similar to odorant binding protein 1a                                                                                                                                                                                                 |
| protein tyrosine phosphatase, receptor type, C                                                                                                                                                                                                                                                                            |
| protein tyrosine phosphatase, receptor type, C                                                                                                                                                                                                                                                                            |
| histocompatibility 2, M region locus 1                                                                                                                                                                                                                                                                                    |
| histocompatibility 2, M region locus 2                                                                                                                                                                                                                                                                                    |
| similar to Uridine-cytidine kinase 1 (UCK 1) (Uridine monophosphokinase 1) (Cytidine monophosphokinase 1)                                                                                                                                                                                                                 |
| potassium voltage-gated channel, Shal-related family, member 1                                                                                                                                                                                                                                                            |

[illegible]

|                                                                                                                                                                               |
|-------------------------------------------------------------------------------------------------------------------------------------------------------------------------------|
| receptor (Go-VN5) /// similar to putative pheromone receptor (Go-VN5) /// similar to putative pheromone receptor (Go-VN5) /// similar to putative pheromone receptor (Go-VN5) |
| similar to putative pheromone receptor (Go-VN5) /// similar to putative pheromone receptor (Go-VN5)                                                                           |
| solute carrier family 18 (vesicular monoamine), member 3                                                                                                                      |
| achaete-scute complex homolog-like 2 (Drosophila)                                                                                                                             |
| thymidine kinase 2, mitochondrial                                                                                                                                             |
| adaptor protein complex AP-2, alpha 1 subunit                                                                                                                                 |
| phospholipase C, beta 3                                                                                                                                                       |
| laminin, beta 2                                                                                                                                                               |
| mitogen activated protein kinase 9                                                                                                                                            |
| adenosine A2a receptor                                                                                                                                                        |
| adenosine A2a receptor                                                                                                                                                        |
| nuclear VCP-like                                                                                                                                                              |
| dynactin 1                                                                                                                                                                    |
| reproductive homeobox 5                                                                                                                                                       |
| zinc finger protein 213                                                                                                                                                       |
| karyopherin (importin) alpha 1                                                                                                                                                |
| cleavage and polyadenylation specific factor 4                                                                                                                                |
| thyroid hormone receptor interactor 13                                                                                                                                        |
| keratin associated protein 6-1                                                                                                                                                |
| keratin associated protein 6-1                                                                                                                                                |
| keratin associated protein 6-1                                                                                                                                                |
| ---                                                                                                                                                                           |
| nudix (nucleoside diphosphate linked moiety X)-type motif 14                                                                                                                  |
| rabaptin, RAB GTPase binding effector protein 1                                                                                                                               |
| pre B-cell leukemia transcription factor 2                                                                                                                                    |
| troponin T1, skeletal, slow                                                                                                                                                   |
| degenerative spermatocyte homolog 2 (Drosophila), lipid desaturase                                                                                                            |
| methyl-CpG binding domain protein 3                                                                                                                                           |
| RIKEN cDNA 1810030J14 gene /// similar to Serum amyloid P-component precursor (SAP)                                                                                           |
| aminoacylase 1 /// similar to aminoacylase 1                                                                                                                                  |
| phosphoglycerate kinase 2                                                                                                                                                     |
| scavenger receptor class B, member 2                                                                                                                                          |
| mucin 3, intestinal /// similar to mucin 17 /// similar to mucin 17                                                                                                           |
| CHMP family, member 7                                                                                                                                                         |
| annexin A3                                                                                                                                                                    |
| sarcoglycan, gamma (dystrophin-associated glycoprotein)                                                                                                                       |
| Purine rich element binding protein B                                                                                                                                         |
| transcription factor 2                                                                                                                                                        |
| solute carrier family 2, (facilitated glucose transporter), member 8                                                                                                          |
| syntaxin binding protein 2                                                                                                                                                    |
| perlecan (heparan sulfate proteoglycan 2)                                                                                                                                     |
| blocked early in transport 1 homolog (S. cerevisiae)                                                                                                                          |
| thyroid hormone receptor associated protein 4                                                                                                                                 |
| chemokine (C-C motif) ligand 25                                                                                                                                               |
| RIKEN cDNA 2310061I09 gene                                                                                                                                                    |
| SWI/SNF related, matrix associated, actin dependent regulator of chromatin, subfamily d, member 1                                                                             |
| sulfotransferase family, cytosolic, 2B, member 1                                                                                                                              |
| frataxin                                                                                                                                                                      |
| guanidinoacetate methyltransferase                                                                                                                                            |
| ligatin                                                                                                                                                                       |
| claudin 4                                                                                                                                                                     |
| SH3-domain GRB2-like 3                                                                                                                                                        |
| E3 ubiquitin protein ligase, HECT domain containing, 1                                                                                                                        |

|                                                                              |
|------------------------------------------------------------------------------|
| lamin B2                                                                     |
| HLA-B associated transcript 4                                                |
| HLA-B associated transcript 4                                                |
| DMRT-like family B with proline-rich C-terminal, 1                           |
| tubulin, beta 4                                                              |
| solute carrier family 32 (GABA vesicular transporter), member 1              |
| ring finger protein 5                                                        |
| formin binding protein 4                                                     |
| DEAD (Asp-Glu-Ala-Asp) box polypeptide 46                                    |
| N-myc (and STAT) interactor                                                  |
| glutathione synthetase                                                       |
| ceramide kinase                                                              |
| angiotensin I converting enzyme (peptidyl-dipeptidase A) 1                   |
| DNA-damage inducible transcript 3                                            |
| similar to Transcription factor SOX-4                                        |
| retinol dehydrogenase 5                                                      |
| tumor protein p53 inducible protein 13                                       |
| major histocompatibility complex, class I-related                            |
| A kinase (PRKA) anchor protein 2                                             |
| chemokine (C-X-C motif) ligand 9                                             |
| STE20-like kinase (yeast)                                                    |
| ADP-ribosylation factor-like 6                                               |
| RIKEN cDNA 2900006F19 gene                                                   |
| inositol 1,4,5-triphosphate receptor 2                                       |
| inositol 1,4,5-triphosphate receptor 2                                       |
| pleckstrin homology domain containing, family H (with MyTH4 domain) member 1 |
| THUMP domain containing 3                                                    |
| DNA methyltransferase (cytosine-5) 1                                         |
| tumor protein D52-like 1                                                     |
| adenomatosis polyposis coli                                                  |
| HGF-regulated tyrosine kinase substrate                                      |
| tripartite motif-containing 41                                               |
| colony stimulating factor 1 (macrophage)                                     |
| paternally expressed 3                                                       |
| melanoma inhibitory activity 1                                               |
| uridine monophosphate synthetase                                             |
| zinc finger protein 106                                                      |
| Janus kinase 2                                                               |
| wee 1 homolog (S. pombe)                                                     |
| chromodomain helicase DNA binding protein 1                                  |
| praja1, RING-H2 motif containing                                             |
| praja1, RING-H2 motif containing                                             |
| apolipoprotein C-IV                                                          |
| tissue inhibitor of metalloproteinase 1                                      |
| signal transducer and activator of transcription 1                           |
| phosphatidylinositol glycan, class F                                         |
| S100 protein, beta polypeptide, neural                                       |
| complement factor properdin                                                  |
| neural precursor cell expressed, developmentally down-regulated gene 9       |
| WD repeat domain 78                                                          |
| pyruvate kinase liver and red blood cell                                     |
| pyruvate kinase liver and red blood cell                                     |
| nicotinamide N-methyltransferase                                             |

|                                                                                                                                                                                                                                                                                                                                                                                                                                                                                                                                                               |
|---------------------------------------------------------------------------------------------------------------------------------------------------------------------------------------------------------------------------------------------------------------------------------------------------------------------------------------------------------------------------------------------------------------------------------------------------------------------------------------------------------------------------------------------------------------|
| mannose binding lectin (A)                                                                                                                                                                                                                                                                                                                                                                                                                                                                                                                                    |
| B lymphoma Mo-MLV insertion region 1                                                                                                                                                                                                                                                                                                                                                                                                                                                                                                                          |
| poly(A) binding protein, nuclear 1                                                                                                                                                                                                                                                                                                                                                                                                                                                                                                                            |
| dynein, axonemal, light chain 4                                                                                                                                                                                                                                                                                                                                                                                                                                                                                                                               |
| ring finger protein 34                                                                                                                                                                                                                                                                                                                                                                                                                                                                                                                                        |
| protein phosphatase 1, catalytic subunit, gamma isoform                                                                                                                                                                                                                                                                                                                                                                                                                                                                                                       |
| cyclin D-type binding-protein 1                                                                                                                                                                                                                                                                                                                                                                                                                                                                                                                               |
| neighbor of Brca1 gene 1                                                                                                                                                                                                                                                                                                                                                                                                                                                                                                                                      |
| DEAD (Asp-Glu-Ala-Asp) box polypeptide 48                                                                                                                                                                                                                                                                                                                                                                                                                                                                                                                     |
| proteasome (prosome, macropain) subunit, beta type 10                                                                                                                                                                                                                                                                                                                                                                                                                                                                                                         |
| lymphocyte antigen 6 complex, locus E                                                                                                                                                                                                                                                                                                                                                                                                                                                                                                                         |
| lymphocyte antigen 6 complex, locus E                                                                                                                                                                                                                                                                                                                                                                                                                                                                                                                         |
| S-adenosylmethionine decarboxylase 1                                                                                                                                                                                                                                                                                                                                                                                                                                                                                                                          |
| HESB like domain containing 2                                                                                                                                                                                                                                                                                                                                                                                                                                                                                                                                 |
| protein (peptidyl-prolyl cis/trans isomerase) NIMA-interacting 1                                                                                                                                                                                                                                                                                                                                                                                                                                                                                              |
| Alpha fetoprotein                                                                                                                                                                                                                                                                                                                                                                                                                                                                                                                                             |
| alpha fetoprotein                                                                                                                                                                                                                                                                                                                                                                                                                                                                                                                                             |
| CD 81 antigen                                                                                                                                                                                                                                                                                                                                                                                                                                                                                                                                                 |
| inositol (myo)-1(or 4)-monophosphatase 1                                                                                                                                                                                                                                                                                                                                                                                                                                                                                                                      |
| integrin linked kinase                                                                                                                                                                                                                                                                                                                                                                                                                                                                                                                                        |
| Erythrocyte protein band 4.1-like 2                                                                                                                                                                                                                                                                                                                                                                                                                                                                                                                           |
| imprinted and ancient                                                                                                                                                                                                                                                                                                                                                                                                                                                                                                                                         |
| TG interacting factor                                                                                                                                                                                                                                                                                                                                                                                                                                                                                                                                         |
| dihydropyrimidinase-like 3                                                                                                                                                                                                                                                                                                                                                                                                                                                                                                                                    |
| TBC1 domain family, member 20                                                                                                                                                                                                                                                                                                                                                                                                                                                                                                                                 |
| small nuclear ribonucleoprotein polypeptide A'                                                                                                                                                                                                                                                                                                                                                                                                                                                                                                                |
| sodium channel modifier 1                                                                                                                                                                                                                                                                                                                                                                                                                                                                                                                                     |
| KH domain containing, RNA binding, signal transduction associated 1                                                                                                                                                                                                                                                                                                                                                                                                                                                                                           |
| von Hippel-Lindau binding protein 1                                                                                                                                                                                                                                                                                                                                                                                                                                                                                                                           |
| proteasome (prosome, macropain) 28 subunit, alpha                                                                                                                                                                                                                                                                                                                                                                                                                                                                                                             |
| signal sequence receptor, delta                                                                                                                                                                                                                                                                                                                                                                                                                                                                                                                               |
| prefoldin 5                                                                                                                                                                                                                                                                                                                                                                                                                                                                                                                                                   |
| trafficking protein particle complex 3                                                                                                                                                                                                                                                                                                                                                                                                                                                                                                                        |
| acyl-Coenzyme A oxidase 1, palmitoyl                                                                                                                                                                                                                                                                                                                                                                                                                                                                                                                          |
| CD59a antigen                                                                                                                                                                                                                                                                                                                                                                                                                                                                                                                                                 |
| testis expressed gene 261                                                                                                                                                                                                                                                                                                                                                                                                                                                                                                                                     |
| intraflagellar transport 20 homolog (Chlamydomonas)                                                                                                                                                                                                                                                                                                                                                                                                                                                                                                           |
| signal recognition particle 14                                                                                                                                                                                                                                                                                                                                                                                                                                                                                                                                |
| spermatogenesis associated 6                                                                                                                                                                                                                                                                                                                                                                                                                                                                                                                                  |
| baculoviral IAP repeat-containing 5                                                                                                                                                                                                                                                                                                                                                                                                                                                                                                                           |
| transmembrane 4 superfamily member 1                                                                                                                                                                                                                                                                                                                                                                                                                                                                                                                          |
| heterogeneous nuclear ribonucleoprotein A3 /// similar to heterogeneous nuclear ribonucleoprotein A3 /// hypothetical protein LOC630677 /// similar to heterogeneous nuclear ribonucleoprotein A3 /// similar to heterogeneous nuclear ribonucleoprotein A3 /// similar to heterogeneous nuclear ribonucleoprotein A3 |
| heterogeneous nuclear ribonucleoprotein A3                                                                                                                                                                                                                                                                                                                                                                                                                                                                                                                    |
| NADH dehydrogenase (ubiquinone) 1 beta subcomplex, 10                                                                                                                                                                                                                                                                                                                                                                                                                                                                                                         |
| homeo box, msh-like 1                                                                                                                                                                                                                                                                                                                                                                                                                                                                                                                                         |
| transcription elongation factor A (SII) 1                                                                                                                                                                                                                                                                                                                                                                                                                                                                                                                     |
| transcription elongation factor A (SII) 1                                                                                                                                                                                                                                                                                                                                                                                                                                                                                                                     |
| transcription elongation factor A (SII) 1                                                                                                                                                                                                                                                                                                                                                                                                                                                                                                                     |
| elongation factor Tu GTP binding domain containing 2                                                                                                                                                                                                                                                                                                                                                                                                                                                                                                          |
| aldolase 2, B isoform                                                                                                                                                                                                                                                                                                                                                                                                                                                                                                                                         |
| aldolase 2, B isoform                                                                                                                                                                                                                                                                                                                                                                                                                                                                                                                                         |
| transition protein 2                                                                                                                                                                                                                                                                                                                                                                                                                                                                                                                                          |

|                                                                                                                                                                                                                                                                                                                                                                                                                               |
|-------------------------------------------------------------------------------------------------------------------------------------------------------------------------------------------------------------------------------------------------------------------------------------------------------------------------------------------------------------------------------------------------------------------------------|
| nuclear receptor co-repressor 1                                                                                                                                                                                                                                                                                                                                                                                               |
| esterase 1                                                                                                                                                                                                                                                                                                                                                                                                                    |
| carboxylesterase 3                                                                                                                                                                                                                                                                                                                                                                                                            |
| carboxylesterase 3                                                                                                                                                                                                                                                                                                                                                                                                            |
| thymine DNA glycosylase /// similar to thymine DNA glycosylase isoform 2 /// similar to G/T mismatch-specific thymine DNA glycosylase (C-JUN leucine zipper interactive protein JZA-3) /// similar to thymine DNA glycosylase isoform 2 /// similar to G/T mismatch-specific thymine DNA glycosylase (C-JUN leucine zipper interactive protein JZA-3)                                                                         |
| ---                                                                                                                                                                                                                                                                                                                                                                                                                           |
| DEAD/H (Asp-Glu-Ala-Asp/His) box polypeptide 3, X-linked                                                                                                                                                                                                                                                                                                                                                                      |
| tubulin, alpha 6                                                                                                                                                                                                                                                                                                                                                                                                              |
| ---                                                                                                                                                                                                                                                                                                                                                                                                                           |
| synaptojanin 2 binding protein                                                                                                                                                                                                                                                                                                                                                                                                |
| testis derived transcript                                                                                                                                                                                                                                                                                                                                                                                                     |
| testis derived transcript                                                                                                                                                                                                                                                                                                                                                                                                     |
| solute carrier family 34 (sodium phosphate), member 1                                                                                                                                                                                                                                                                                                                                                                         |
| fibrinogen, alpha polypeptide                                                                                                                                                                                                                                                                                                                                                                                                 |
| nuclear factor of kappa light chain gene enhancer in B-cells inhibitor, alpha                                                                                                                                                                                                                                                                                                                                                 |
| RAS-related C3 botulinum substrate 1                                                                                                                                                                                                                                                                                                                                                                                          |
| branched chain ketoacid dehydrogenase kinase                                                                                                                                                                                                                                                                                                                                                                                  |
| proteasome (prosome, macropain) subunit, beta type 5                                                                                                                                                                                                                                                                                                                                                                          |
| embigin                                                                                                                                                                                                                                                                                                                                                                                                                       |
| metallothionein 2                                                                                                                                                                                                                                                                                                                                                                                                             |
| heat shock protein 14                                                                                                                                                                                                                                                                                                                                                                                                         |
| CCR4-NOT transcription complex, subunit 7                                                                                                                                                                                                                                                                                                                                                                                     |
| serine (or cysteine) peptidase inhibitor, clade A, member 1a /// serine (or cysteine) preptidase inhibitor, clade A, member 1b /// serine (or cysteine) peptidase inhibitor, clade A, member 1c /// serine (or cysteine) peptidase inhibitor, clade A, member 1d                                                                                                                                                              |
| major urinary protein 1 /// major urinary protein 2                                                                                                                                                                                                                                                                                                                                                                           |
| Proline synthetase co-transcribed                                                                                                                                                                                                                                                                                                                                                                                             |
| proline synthetase co-transcribed                                                                                                                                                                                                                                                                                                                                                                                             |
| keratin complex 2, basic, gene 6g                                                                                                                                                                                                                                                                                                                                                                                             |
| insulin-like growth factor binding protein 4                                                                                                                                                                                                                                                                                                                                                                                  |
| insulin-like growth factor binding protein 4                                                                                                                                                                                                                                                                                                                                                                                  |
| serine (or cysteine) peptidase inhibitor, clade A, member 1a                                                                                                                                                                                                                                                                                                                                                                  |
| ribosomal protein L27a /// similar to 60S ribosomal protein L27a (L29) /// similar to ribosomal protein L27a /// similar to 60S ribosomal protein L27a /// hypothetical protein LOC675878 |
| serine (or cysteine) peptidase inhibitor, clade A, member 1e                                                                                                                                                                                                                                                                                                                                                                  |
| serine (or cysteine) preptidase inhibitor, clade A, member 1b                                                                                                                                                                                                                                                                                                                                                                 |
| serine (or cysteine) peptidase inhibitor, clade A, member 1a /// serine (or cysteine) preptidase inhibitor, clade A, member 1b /// serine (or cysteine) peptidase inhibitor, clade A, member 1c /// serine (or cysteine) peptidase inhibitor, clade A, member 1d                                                                                                                                                              |
| ribosomal protein S6 /// similar to 40S ribosomal protein S6                                                                          |
| actin, beta, cytoplasmic                                                                                                                                                                                                                                                                                                                                                                                                      |
| signal recognition particle 9                                                                                                                                                                                                                                                                                                                                                                                                 |
| cytochrome c oxidase subunit VIIb                                                                                                                                                                                                                                                                                                                                                                                             |
| ubiquitin protein ligase E3A                                                                                                                                                                                                                                                                                                                                                                                                  |
| guanine nucleotide binding protein-like 2 (nucleolar)                                                                                                                                                                                                                                                                                                                                                                         |
| B-cell translocation gene 2, anti-proliferative                                                                                                                                                                                                                                                                                                                                                                               |
| Ras suppressor protein 1                                                                                                                                                                                                                                                                                                                                                                                                      |
| progesterone receptor membrane component 1                                                                                                                                                                                                                                                                                                                                                                                    |
| epoxide hydrolase 1, microsomal                                                                                                                                                                                                                                                                                                                                                                                               |
| solute carrier family 16 (monocarboxylic acid transporters), member 1                                                                                                                                                                                                                                                                                                                                                         |
| high mobility group nucleosomal binding domain 2                                                                                                                                                                                                                                                                                                                                                                              |
| lysosomal membrane glycoprotein 2                                                                                                                                                                                                                                                                                                                                                                                             |
| X-prolyl aminopeptidase (aminopeptidase P) 1, soluble                                                                                                                                                                                                                                                                                                                                                                         |
| cysteine rich protein 2                                                                                                                                                                                                                                                                                                                                                                                                       |

|                                                                                                                                                                                                                                                                                                                                                                                                                               |
|-------------------------------------------------------------------------------------------------------------------------------------------------------------------------------------------------------------------------------------------------------------------------------------------------------------------------------------------------------------------------------------------------------------------------------|
| RAN binding protein 9                                                                                                                                                                                                                                                                                                                                                                                                         |
| ---                                                                                                                                                                                                                                                                                                                                                                                                                           |
| DNA segment, Chr 12, ERATO Doi 216, expressed                                                                                                                                                                                                                                                                                                                                                                                 |
| Transcribed locus                                                                                                                                                                                                                                                                                                                                                                                                             |
| RIKEN cDNA C030018P15 gene                                                                                                                                                                                                                                                                                                                                                                                                    |
| expressed sequence C79015                                                                                                                                                                                                                                                                                                                                                                                                     |
| DNA segment, Chr X, ERATO Doi 223, expressed                                                                                                                                                                                                                                                                                                                                                                                  |
| UDP-N-acetyl-alpha-D-galactosamine:polypeptide N-acetylgalactosaminyltransferase 4                                                                                                                                                                                                                                                                                                                                            |
| UDP-N-acetyl-alpha-D-galactosamine:polypeptide N-acetylgalactosaminyltransferase 4                                                                                                                                                                                                                                                                                                                                            |
| expressed sequence C79296                                                                                                                                                                                                                                                                                                                                                                                                     |
| DNA segment, Chr 3, ERATO Doi 246, expressed                                                                                                                                                                                                                                                                                                                                                                                  |
| DNA segment, Chr 1, ERATO Doi 259, expressed                                                                                                                                                                                                                                                                                                                                                                                  |
| expressed sequence C80068                                                                                                                                                                                                                                                                                                                                                                                                     |
| expressed sequence C80360                                                                                                                                                                                                                                                                                                                                                                                                     |
| solute carrier family 5 (sodium/glucose cotransporter), member 11                                                                                                                                                                                                                                                                                                                                                             |
| 3-oxoacyl-ACP synthase, mitochondrial                                                                                                                                                                                                                                                                                                                                                                                         |
| DNA segment, Chr 11, ERATO Doi 326, expressed                                                                                                                                                                                                                                                                                                                                                                                 |
| large tumor suppressor                                                                                                                                                                                                                                                                                                                                                                                                        |
| PREDICTED: Mus musculus similar to developmentally regulated repeat element-containing transcript 1 (LOC622619), mRNA                                                                                                                                                                                                                                                                                                         |
| ---                                                                                                                                                                                                                                                                                                                                                                                                                           |
| Pericentrin (kendrin)                                                                                                                                                                                                                                                                                                                                                                                                         |
| gene model 1067, (NCBI)                                                                                                                                                                                                                                                                                                                                                                                                       |
| P53-variant (p53)                                                                                                                                                                                                                                                                                                                                                                                                             |
| P53-variant (p53)                                                                                                                                                                                                                                                                                                                                                                                                             |
| interferon alpha family, gene 6                                                                                                                                                                                                                                                                                                                                                                                               |
| glycoprotein 1b, alpha polypeptide                                                                                                                                                                                                                                                                                                                                                                                            |
| androgen-binding protein eta                                                                                                                                                                                                                                                                                                                                                                                                  |
| aristaless 4                                                                                                                                                                                                                                                                                                                                                                                                                  |
| solute carrier family 16 (monocarboxylic acid transporters), member 8                                                                                                                                                                                                                                                                                                                                                         |
| K+ voltage-gated channel, subfamily S, 1                                                                                                                                                                                                                                                                                                                                                                                      |
| K+ voltage-gated channel, subfamily S, 2                                                                                                                                                                                                                                                                                                                                                                                      |
| a disintegrin and metallopeptidase domain 7                                                                                                                                                                                                                                                                                                                                                                                   |
| phospholipase D1                                                                                                                                                                                                                                                                                                                                                                                                              |
| phospholipase D1                                                                                                                                                                                                                                                                                                                                                                                                              |
| syntaxin 1B2 /// syntaxin 1B1                                                                                                                                                                                                                                                                                                                                                                                                 |
| vomeronasal 2, receptor, 1 /// vomeronasal 2, receptor, 12 /// vomeronasal 2, receptor, 2 /// vomeronasal 2, receptor, 8 /// vomeronasal 2, receptor, 9                                                                                                                                                                                                                                                                       |
| SRY-box containing gene 11                                                                                                                                                                                                                                                                                                                                                                                                    |
| tumor necrosis factor receptor superfamily, member 11a                                                                                                                                                                                                                                                                                                                                                                        |
| immunoglobulin kappa chain variable 17-127 /// similar to Ig kappa chain V region EV15 precursor /// similar to Ig kappa chain V region EV15 precursor /// similar to Ig kappa chain V region EV15 precursor /// similar to Ig kappa chain V region EV15 precursor /// immunoglobulin kappa chain variable 17-121 /// similar to Ig kappa chain V region EV15 precursor /// similar to Ig kappa chain V region EV15 precursor |
| nucleophosmin 1                                                                                                                                                                                                                                                                                                                                                                                                               |
| major urinary protein 5                                                                                                                                                                                                                                                                                                                                                                                                       |
| salivary protein 2                                                                                                                                                                                                                                                                                                                                                                                                            |
| CEA-related cell adhesion molecule 10                                                                                                                                                                                                                                                                                                                                                                                         |
| cytochrome P450, family 3, subfamily a, polypeptide 11 /// cytochrome P450, family 3, subfamily a, polypeptide 16                                                                                                                                                                                                                                                                                                             |
| cytochrome P450, family 3, subfamily a, polypeptide 16                                                                                                                                                                                                                                                                                                                                                                        |
| gene model 1418, (NCBI) /// gene model 1419, (NCBI) /// gene model 1499, (NCBI) /// immunoglobulin kappa chain variable 4-61 /// immunoglobulin kappa chain variable 4-59 /// similar to Ig kappa chain V-IV region S107B precursor /// similar to Ig kappa chain V-IV region S107B precursor /// similar to Ig kappa chain V-IV region S107B precursor                                                                       |
| ---                                                                                                                                                                                                                                                                                                                                                                                                                           |
| ---                                                                                                                                                                                                                                                                                                                                                                                                                           |
| syntaxin 1B1                                                                                                                                                                                                                                                                                                                                                                                                                  |
| vomeronasal 2, receptor, 1 /// vomeronasal 2, receptor, 12 /// vomeronasal 2, receptor, 2 /// vomeronasal 2, receptor, 8 /// vomeronasal 2, receptor, 9                                                                                                                                                                                                                                                                       |
| vomeronasal 2, receptor, 10 /// vomeronasal 2, receptor, 11                                                                                                                                                                                                                                                                                                                                                                   |
| phosphatidylinositol glycan, class Q                                                                                                                                                                                                                                                                                                                                                                                          |



|                                                                                                                                                                                                                                                                                                                                                                                                      |
|------------------------------------------------------------------------------------------------------------------------------------------------------------------------------------------------------------------------------------------------------------------------------------------------------------------------------------------------------------------------------------------------------|
| Adenosine kinase                                                                                                                                                                                                                                                                                                                                                                                     |
| forkhead box D4                                                                                                                                                                                                                                                                                                                                                                                      |
| phosphatidylinositol-4-phosphate 5-kinase, type 1 alpha                                                                                                                                                                                                                                                                                                                                              |
| protocadherin alpha 4 /// protocadherin alpha 6 /// protocadherin alpha 7 /// protocadherin alpha 5 /// protocadherin alpha 11 /// protocadherin alpha 10 /// protocadherin alpha 1 /// protocadherin alpha 9 /// protocadherin alpha 3 /// protocadherin alpha 12 /// protocadherin alpha 2 /// protocadherin alpha 8 /// protocadherin alpha subfamily C, 1 /// protocadherin alpha subfamily C, 2 |
| ciliary neurotrophic factor receptor                                                                                                                                                                                                                                                                                                                                                                 |
| histocompatibility 2, D region locus 4                                                                                                                                                                                                                                                                                                                                                               |
| histocompatibility 2, D region locus 4                                                                                                                                                                                                                                                                                                                                                               |
| histone 1, H2bb                                                                                                                                                                                                                                                                                                                                                                                      |
| zinc finger protein 94                                                                                                                                                                                                                                                                                                                                                                               |
| immunoglobulin heavy chain (V7183 family) /// immunoglobulin kappa chain variable 1 (V1) /// immunoglobulin kappa chain variable 1-117 /// Ig kappa chain /// immunoglobulin kappa chain variable 1-110                                                                                                                                                                                              |
| bone morphogenetic protein 8b                                                                                                                                                                                                                                                                                                                                                                        |
| histocompatibility 2, Q region locus 8                                                                                                                                                                                                                                                                                                                                                               |
| hydroxysteroid dehydrogenase-2, delta<5>-3-beta                                                                                                                                                                                                                                                                                                                                                      |
| 5-methyltetrahydrofolate-homocysteine methyltransferase                                                                                                                                                                                                                                                                                                                                              |
| Transcribed locus                                                                                                                                                                                                                                                                                                                                                                                    |
| Suppressor of zeste 12 homolog (Drosophila)                                                                                                                                                                                                                                                                                                                                                          |
| Hedgehog acyltransferase                                                                                                                                                                                                                                                                                                                                                                             |
| ribosomal protein S3a                                                                                                                                                                                                                                                                                                                                                                                |
| nuclear receptor subfamily 5, group A, member 1                                                                                                                                                                                                                                                                                                                                                      |
| nuclear receptor subfamily 5, group A, member 1                                                                                                                                                                                                                                                                                                                                                      |
| CWF19-like 1, cell cycle control (S. pombe)                                                                                                                                                                                                                                                                                                                                                          |
| expressed sequence AA589418                                                                                                                                                                                                                                                                                                                                                                          |
| ---                                                                                                                                                                                                                                                                                                                                                                                                  |
| Serine/threonine kinase 4                                                                                                                                                                                                                                                                                                                                                                            |
| Transcribed locus                                                                                                                                                                                                                                                                                                                                                                                    |
| CDNA sequence BC021785                                                                                                                                                                                                                                                                                                                                                                               |
| expressed sequence AA675035                                                                                                                                                                                                                                                                                                                                                                          |
| Serine/threonine kinase 36 (fused homolog, Drosophila)                                                                                                                                                                                                                                                                                                                                               |
| ---                                                                                                                                                                                                                                                                                                                                                                                                  |
| glutathione peroxidase 3                                                                                                                                                                                                                                                                                                                                                                             |
| RIKEN cDNA 1110035H17 gene                                                                                                                                                                                                                                                                                                                                                                           |
| ---                                                                                                                                                                                                                                                                                                                                                                                                  |
| opsin 1 (cone pigments), medium-wave-sensitive (color blindness, deutan)                                                                                                                                                                                                                                                                                                                             |
| ribosomal protein L27a /// similar to 60S ribosomal protein L27a (L29) /// similar to ribosomal protein L27a /// similar to 60S ribosomal protein L27a (L29)                                           |
| histocompatibility 2, blastocyst                                                                                                                                                                                                                                                                                                                                                                     |
| major urinary protein 4                                                                                                                                                                                                                                                                                                                                                                              |
| GIPC PDZ domain containing family, member 1                                                                                                                                                                                                                                                                                                                                                          |
| simple repeat sequence-containing transcript                                                                                                                                                                                                                                                                                                                                                         |
| ---                                                                                                                                                                                                                                                                                                                                                                                                  |
| Zinc finger protein 59                                                                                                                                                                                                                                                                                                                                                                               |
| ---                                                                                                                                                                                                                                                                                                                                                                                                  |
| DNA segment, Chr 4, ERATO Doi 58, expressed                                                                                                                                                                                                                                                                                                                                                          |
| expressed sequence AA416453                                                                                                                                                                                                                                                                                                                                                                          |
| ---                                                                                                                                                                                                                                                                                                                                                                                                  |
| expressed sequence C77405                                                                                                                                                                                                                                                                                                                                                                            |
| expressed sequence C77405                                                                                                                                                                                                                                                                                                                                                                            |
| translocase of inner mitochondrial membrane 8 homolog a2 (yeast)                                                                                                                                                                                                                                                                                                                                     |
| MYST histone acetyltransferase 2                                                                                                                                                                                                                                                                                                                                                                     |
| Eukaryotic translation initiation factor 3, subunit 6                                                                                                                                                                                                                                                                                                                                                |
| ---                                                                                                                                                                                                                                                                                                                                                                                                  |
| ---                                                                                                                                                                                                                                                                                                                                                                                                  |
| keratin complex 2, basic, gene 17                                                                                                                                                                                                                                                                                                                                                                    |

|                                                                                                                                                                                                                                                                                                                                                                                                                                                                                                                                                                                                                                                                                                                                                                                                                                                                                                                                                                                                       |
|-------------------------------------------------------------------------------------------------------------------------------------------------------------------------------------------------------------------------------------------------------------------------------------------------------------------------------------------------------------------------------------------------------------------------------------------------------------------------------------------------------------------------------------------------------------------------------------------------------------------------------------------------------------------------------------------------------------------------------------------------------------------------------------------------------------------------------------------------------------------------------------------------------------------------------------------------------------------------------------------------------|
| per-hexamer repeat gene 2                                                                                                                                                                                                                                                                                                                                                                                                                                                                                                                                                                                                                                                                                                                                                                                                                                                                                                                                                                             |
| per-hexamer repeat gene 4                                                                                                                                                                                                                                                                                                                                                                                                                                                                                                                                                                                                                                                                                                                                                                                                                                                                                                                                                                             |
| cadherin 8                                                                                                                                                                                                                                                                                                                                                                                                                                                                                                                                                                                                                                                                                                                                                                                                                                                                                                                                                                                            |
| retinoschisis 1 homolog (human)                                                                                                                                                                                                                                                                                                                                                                                                                                                                                                                                                                                                                                                                                                                                                                                                                                                                                                                                                                       |
| ---                                                                                                                                                                                                                                                                                                                                                                                                                                                                                                                                                                                                                                                                                                                                                                                                                                                                                                                                                                                                   |
| hepatocyte nuclear factor 4, gamma                                                                                                                                                                                                                                                                                                                                                                                                                                                                                                                                                                                                                                                                                                                                                                                                                                                                                                                                                                    |
| per-hexamer repeat gene 1                                                                                                                                                                                                                                                                                                                                                                                                                                                                                                                                                                                                                                                                                                                                                                                                                                                                                                                                                                             |
| cyclic nucleotide gated channel alpha 3                                                                                                                                                                                                                                                                                                                                                                                                                                                                                                                                                                                                                                                                                                                                                                                                                                                                                                                                                               |
| aldehyde dehydrogenase family 1, subfamily A2                                                                                                                                                                                                                                                                                                                                                                                                                                                                                                                                                                                                                                                                                                                                                                                                                                                                                                                                                         |
| myosin IF                                                                                                                                                                                                                                                                                                                                                                                                                                                                                                                                                                                                                                                                                                                                                                                                                                                                                                                                                                                             |
| aryl-hydrocarbon receptor repressor                                                                                                                                                                                                                                                                                                                                                                                                                                                                                                                                                                                                                                                                                                                                                                                                                                                                                                                                                                   |
| glutamate receptor, ionotropic, AMPA4 (alpha 4)                                                                                                                                                                                                                                                                                                                                                                                                                                                                                                                                                                                                                                                                                                                                                                                                                                                                                                                                                       |
| myelodysplasia syndrome 1 homolog (human)                                                                                                                                                                                                                                                                                                                                                                                                                                                                                                                                                                                                                                                                                                                                                                                                                                                                                                                                                             |
| purinergic receptor P2X, ligand-gated ion channel, 7                                                                                                                                                                                                                                                                                                                                                                                                                                                                                                                                                                                                                                                                                                                                                                                                                                                                                                                                                  |
| solute carrier family 7 (cationic amino acid transporter, y+ system), member 11                                                                                                                                                                                                                                                                                                                                                                                                                                                                                                                                                                                                                                                                                                                                                                                                                                                                                                                       |
| odd Oz/ten-m homolog 1 (Drosophila)                                                                                                                                                                                                                                                                                                                                                                                                                                                                                                                                                                                                                                                                                                                                                                                                                                                                                                                                                                   |
| eosinophil-associated, ribonuclease A family, member 4                                                                                                                                                                                                                                                                                                                                                                                                                                                                                                                                                                                                                                                                                                                                                                                                                                                                                                                                                |
| eosinophil-associated, ribonuclease A family, member 5                                                                                                                                                                                                                                                                                                                                                                                                                                                                                                                                                                                                                                                                                                                                                                                                                                                                                                                                                |
| somatostatin receptor 4                                                                                                                                                                                                                                                                                                                                                                                                                                                                                                                                                                                                                                                                                                                                                                                                                                                                                                                                                                               |
| gene model 1419, (NCBI) /// gene model 1502, (NCBI) /// immunoglobulin kappa chain variable 4-61                                                                                                                                                                                                                                                                                                                                                                                                                                                                                                                                                                                                                                                                                                                                                                                                                                                                                                      |
| phenylethanolamine-N-methyltransferase                                                                                                                                                                                                                                                                                                                                                                                                                                                                                                                                                                                                                                                                                                                                                                                                                                                                                                                                                                |
| immunoglobulin kappa chain variable 8 (V8)                                                                                                                                                                                                                                                                                                                                                                                                                                                                                                                                                                                                                                                                                                                                                                                                                                                                                                                                                            |
| a disintegrin and metallopeptidase domain 28                                                                                                                                                                                                                                                                                                                                                                                                                                                                                                                                                                                                                                                                                                                                                                                                                                                                                                                                                          |
| hairy and enhancer of split 2 (Drosophila)                                                                                                                                                                                                                                                                                                                                                                                                                                                                                                                                                                                                                                                                                                                                                                                                                                                                                                                                                            |
| UDP-Gal:betaGlcNAc beta 1,3-galactosyltransferase, polypeptide 1                                                                                                                                                                                                                                                                                                                                                                                                                                                                                                                                                                                                                                                                                                                                                                                                                                                                                                                                      |
| neuromedin B receptor                                                                                                                                                                                                                                                                                                                                                                                                                                                                                                                                                                                                                                                                                                                                                                                                                                                                                                                                                                                 |
| nuclear factor of kappa light polypeptide gene enhancer in B-cells inhibitor, epsilon                                                                                                                                                                                                                                                                                                                                                                                                                                                                                                                                                                                                                                                                                                                                                                                                                                                                                                                 |
| complement component 5a receptor 1                                                                                                                                                                                                                                                                                                                                                                                                                                                                                                                                                                                                                                                                                                                                                                                                                                                                                                                                                                    |
| gap junction membrane channel protein alpha 9                                                                                                                                                                                                                                                                                                                                                                                                                                                                                                                                                                                                                                                                                                                                                                                                                                                                                                                                                         |
| cadherin 6                                                                                                                                                                                                                                                                                                                                                                                                                                                                                                                                                                                                                                                                                                                                                                                                                                                                                                                                                                                            |
| ---                                                                                                                                                                                                                                                                                                                                                                                                                                                                                                                                                                                                                                                                                                                                                                                                                                                                                                                                                                                                   |
| per-hexamer repeat gene 5                                                                                                                                                                                                                                                                                                                                                                                                                                                                                                                                                                                                                                                                                                                                                                                                                                                                                                                                                                             |
| chemokine (C-C motif) receptor 1-like 1                                                                                                                                                                                                                                                                                                                                                                                                                                                                                                                                                                                                                                                                                                                                                                                                                                                                                                                                                               |
| glutamate receptor, ionotropic, delta 2                                                                                                                                                                                                                                                                                                                                                                                                                                                                                                                                                                                                                                                                                                                                                                                                                                                                                                                                                               |
| angiogenin, ribonuclease A family, member 2                                                                                                                                                                                                                                                                                                                                                                                                                                                                                                                                                                                                                                                                                                                                                                                                                                                                                                                                                           |
| pancreatic polypeptide receptor 1                                                                                                                                                                                                                                                                                                                                                                                                                                                                                                                                                                                                                                                                                                                                                                                                                                                                                                                                                                     |
| follicle stimulating hormone beta                                                                                                                                                                                                                                                                                                                                                                                                                                                                                                                                                                                                                                                                                                                                                                                                                                                                                                                                                                     |
| luteinizing hormone beta                                                                                                                                                                                                                                                                                                                                                                                                                                                                                                                                                                                                                                                                                                                                                                                                                                                                                                                                                                              |
| cell matrix adhesion regulator                                                                                                                                                                                                                                                                                                                                                                                                                                                                                                                                                                                                                                                                                                                                                                                                                                                                                                                                                                        |
| adrenergic receptor, alpha 1a                                                                                                                                                                                                                                                                                                                                                                                                                                                                                                                                                                                                                                                                                                                                                                                                                                                                                                                                                                         |
| proteasome (prosome, macropain) subunit, beta type 5                                                                                                                                                                                                                                                                                                                                                                                                                                                                                                                                                                                                                                                                                                                                                                                                                                                                                                                                                  |
| tissue-type vomeronasal neurons putative pheromone receptor V2R2                                                                                                                                                                                                                                                                                                                                                                                                                                                                                                                                                                                                                                                                                                                                                                                                                                                                                                                                      |
| immunoglobulin heavy chain 1a (serum IgG2a)                                                                                                                                                                                                                                                                                                                                                                                                                                                                                                                                                                                                                                                                                                                                                                                                                                                                                                                                                           |
| Immunoglobulin heavy chain (J558 family) /// Immunoglobulin heavy chain 1a (serum IgG2a)                                                                                                                                                                                                                                                                                                                                                                                                                                                                                                                                                                                                                                                                                                                                                                                                                                                                                                              |
| immunoglobulin heavy chain 6 (heavy chain of IgM)                                                                                                                                                                                                                                                                                                                                                                                                                                                                                                                                                                                                                                                                                                                                                                                                                                                                                                                                                     |
| Immunoglobulin heavy chain (J558 family)                                                                                                                                                                                                                                                                                                                                                                                                                                                                                                                                                                                                                                                                                                                                                                                                                                                                                                                                                              |
| Immunoglobulin heavy chain (J558 family)                                                                                                                                                                                                                                                                                                                                                                                                                                                                                                                                                                                                                                                                                                                                                                                                                                                                                                                                                              |
| bradykinin receptor, beta 1                                                                                                                                                                                                                                                                                                                                                                                                                                                                                                                                                                                                                                                                                                                                                                                                                                                                                                                                                                           |
| Immunoglobulin heavy chain complex                                                                                                                                                                                                                                                                                                                                                                                                                                                                                                                                                                                                                                                                                                                                                                                                                                                                                                                                                                    |
| gene model 189, (NCBI) /// gene model 1419, (NCBI) /// immunoglobulin kappa chain variable 4-61 /// immunoglobulin kappa chain variable 4-56 /// immunoglobulin kappa chain variable 13-78-1 /// immunoglobulin kappa chain variable 4-73 /// immunoglobulin kappa chain variable 4-69 /// immunoglobulin kappa chain variable 4-63 /// similar to Ig kappa chain V-IV region S107B precursor /// similar to Ig kappa chain V-IV region S107B precursor /// similar to Ig kappa chain V-IV region S107B precursor /// similar to Ig kappa chain V-IV region S107B precursor /// similar to Ig kappa chain V-VI region NQ2-17.4.1 /// immunoglobulin kappa chain variable 4-77 /// immunoglobulin kappa chain variable 4-59 /// hypothetical protein LOC670901 /// similar to Ig kappa chain V-IV region S107B precursor /// similar to Ig kappa chain V-IV region S107B precursor /// similar to Ig kappa chain V-IV region S107B precursor /// similar to Ig kappa chain V-IV region S107B precursor |

|                                                                                                                                                                                                                                        |
|----------------------------------------------------------------------------------------------------------------------------------------------------------------------------------------------------------------------------------------|
| Immunoglobulin heavy chain 1a (serum IgG2a)                                                                                                                                                                                            |
| lysozyme /// P lysozyme structural                                                                                                                                                                                                     |
| small proline-rich protein 2G                                                                                                                                                                                                          |
| small proline-rich protein 2J                                                                                                                                                                                                          |
| small proline-rich protein 2K                                                                                                                                                                                                          |
| nuclear factor, erythroid derived 2,-like 1                                                                                                                                                                                            |
| gremlin 1                                                                                                                                                                                                                              |
| ---                                                                                                                                                                                                                                    |
| fucosyltransferase 2                                                                                                                                                                                                                   |
| small proline-rich protein 2D /// small proline-rich protein 2E /// small proline-rich protein 2F /// small proline-rich protein 2H /// small proline-rich protein 2I /// small proline-rich protein 2J                                |
| small proline-rich protein 3                                                                                                                                                                                                           |
| G-protein-coupled receptor 50                                                                                                                                                                                                          |
| 5-hydroxytryptamine (serotonin) receptor 1D                                                                                                                                                                                            |
| anti-Mullerian hormone                                                                                                                                                                                                                 |
| ---                                                                                                                                                                                                                                    |
| protocadherin alpha 10                                                                                                                                                                                                                 |
| protocadherin alpha 12                                                                                                                                                                                                                 |
| protocadherin alpha 12 /// similar to protocadherin alpha 12                                                                                                                                                                           |
| protocadherin alpha 11                                                                                                                                                                                                                 |
| protocadherin alpha 9                                                                                                                                                                                                                  |
| procollagen, type IV, alpha 4                                                                                                                                                                                                          |
| LIM homeobox transcription factor 1 beta                                                                                                                                                                                               |
| v-erb-b2 erythroblastic leukemia viral oncogene homolog 3 (avian)                                                                                                                                                                      |
| v-erb-a erythroblastic leukemia viral oncogene homolog 4 (avian)                                                                                                                                                                       |
| gap junction membrane channel protein alpha 5                                                                                                                                                                                          |
| dopamine receptor 3                                                                                                                                                                                                                    |
| ---                                                                                                                                                                                                                                    |
| similar to H3 histone, family 3B /// similar to Histone H3.3A CG5825-PB, isoform B |
| ---                                                                                                                                                                                                                                    |
| ---                                                                                                                                                                                                                                    |
| ---                                                                                                                                                                                                                                    |
| potassium voltage-gated channel, shaker-related subfamily, member 4                                                                                                                                                                    |
| CCR4 carbon catabolite repression 4-like (S. cerevisiae)                                                                                                                                                                               |
| interferon alpha family, gene 1                                                                                                                                                                                                        |
| interferon alpha family, gene 4                                                                                                                                                                                                        |
| interferon alpha family, gene 4                                                                                                                                                                                                        |
| interferon alpha family, gene 5                                                                                                                                                                                                        |
| ---                                                                                                                                                                                                                                    |
| Fc receptor, IgG, high affinity I                                                                                                                                                                                                      |
| defensin-related cryptdin 23                                                                                                                                                                                                           |
| defensin related cryptdin, related sequence 12                                                                                                                                                                                         |
| protocadherin 7                                                                                                                                                                                                                        |
| sine oculis-related homeobox 6 homolog (Drosophila)                                                                                                                                                                                    |
| ---                                                                                                                                                                                                                                    |
| ---                                                                                                                                                                                                                                    |
| formyl peptide receptor, related sequence 2                                                                                                                                                                                            |
| formyl peptide receptor, related sequence 3                                                                                                                                                                                            |
| formyl peptide receptor, related sequence 4                                                                                                                                                                                            |
| similar to Mucin-5AC (Mucin 5 subtype AC, tracheobronchial) (Tracheobronchial mucin) (TBM) (Major airway glycoprotein)                                                                                                                 |
| ---                                                                                                                                                                                                                                    |
| nuclear factor, interleukin 3, regulated                                                                                                                                                                                               |
| galanin receptor 3                                                                                                                                                                                                                     |
| melanoma antigen, family A, 4                                                                                                                                                                                                          |

[illegible]

|                                                                                                                                                                                            |
|--------------------------------------------------------------------------------------------------------------------------------------------------------------------------------------------|
| hemoglobin, beta adult major chain /// hemoglobin, beta adult minor chain                                                                                                                  |
| immunoglobulin heavy chain 4 (serum IgG1)                                                                                                                                                  |
| immunoglobulin heavy chain 4 (serum IgG1)                                                                                                                                                  |
| glutathione S-transferase, alpha 2 (Yc2) /// similar to Glutathione S-transferase Ya chain (GST class-alpha) (Ya1)                                                                         |
| Janus kinase 3                                                                                                                                                                             |
| prolactin-like protein E                                                                                                                                                                   |
| protein phosphatase 2, regulatory subunit B (B56), delta isoform                                                                                                                           |
| histocompatibility 2, T region locus 10 /// histocompatibility 2, T region locus 22 /// histocompatibility 2, T region locus 9                                                             |
| solute carrier family 31, member 1                                                                                                                                                         |
| similar to B-cell differentiation antigen CD72 (Lyb-2) (Antigen Ly-32)                                                                                                                     |
| complement receptor related protein                                                                                                                                                        |
| procollagen, type XVIII, alpha 1                                                                                                                                                           |
| procollagen, type XVIII, alpha 1                                                                                                                                                           |
| procollagen, type XVIII, alpha 1                                                                                                                                                           |
| X-linked lymphocyte-regulated 3A /// X-linked lymphocyte-regulated 3B /// hypothetical protein LOC574437 /// similar to X-LINKED LYMPHOCYTE-REGULATED PROTEIN 3A (XLR RELATED PROTEIN A12) |
| X-linked lymphocyte-regulated 4A                                                                                                                                                           |
| growth arrest specific 5                                                                                                                                                                   |
| histocompatibility 2, D region locus 1                                                                                                                                                     |
| angiotensinogen (serpin peptidase inhibitor, clade A, member 8)                                                                                                                            |
| RAR-related orphan receptor alpha                                                                                                                                                          |
| RAR-related orphan receptor alpha                                                                                                                                                          |
| DnaJ (Hsp40) homolog, subfamily C, member 2                                                                                                                                                |
| hydroxysteroid (17-beta) dehydrogenase 2                                                                                                                                                   |
| fused toes                                                                                                                                                                                 |
| fused toes                                                                                                                                                                                 |
| fused toes                                                                                                                                                                                 |
| CD1d2 antigen                                                                                                                                                                              |
| CD1d1 antigen /// CD1d2 antigen                                                                                                                                                            |
| histocompatibility 2, Q region locus 10                                                                                                                                                    |
| coagulation factor II                                                                                                                                                                      |
| cyclin-dependent kinase inhibitor 2B (p15, inhibits CDK4)                                                                                                                                  |
| mannose-P-dolichol utilization defect 1                                                                                                                                                    |
| recombining binding protein suppressor of hairless (Drosophila)                                                                                                                            |
| SET and MYND domain containing 1                                                                                                                                                           |
| SET and MYND domain containing 1                                                                                                                                                           |
| itchy                                                                                                                                                                                      |
| SMC4 structural maintenance of chromosomes 4-like 1 (yeast) /// similar to SMC4 structural maintenance of chromosomes 4-like 1                                                             |
| CEA-related cell adhesion molecule 2                                                                                                                                                       |
| CEA-related cell adhesion molecule 1 /// CEA-related cell adhesion molecule 2                                                                                                              |
| major urinary protein 3                                                                                                                                                                    |
| major urinary protein 3                                                                                                                                                                    |
| RIKEN cDNA 1100001G20 gene                                                                                                                                                                 |
| chloride channel 5                                                                                                                                                                         |
| angel homolog 2 (Drosophila)                                                                                                                                                               |
| lethal giant larvae homolog 2 (Drosophila)                                                                                                                                                 |
| interleukin 2 receptor, alpha chain                                                                                                                                                        |
| transforming growth factor, beta 1                                                                                                                                                         |
| zinc finger protein X-linked                                                                                                                                                               |
| polymerase (DNA directed), epsilon 2 (p59 subunit)                                                                                                                                         |
| RAB4A, member RAS oncogene family                                                                                                                                                          |
| KDEL (Lys-Asp-Glu-Leu) endoplasmic reticulum protein retention receptor 2                                                                                                                  |
| phospholipase A2, group VII (platelet-activating factor acetylhydrolase, plasma)                                                                                                           |
| RAD51-like 3 (S. cerevisiae)                                                                                                                                                               |

|                                                                                                                                                                                                                                                                                 |
|---------------------------------------------------------------------------------------------------------------------------------------------------------------------------------------------------------------------------------------------------------------------------------|
| proviral integration site 2                                                                                                                                                                                                                                                     |
| protein kinase, cAMP dependent regulatory, type I beta                                                                                                                                                                                                                          |
| serine (or cysteine) peptidase inhibitor, clade F, member 2                                                                                                                                                                                                                     |
| dynein light chain LC8-type 2                                                                                                                                                                                                                                                   |
| nuclear factor I/X                                                                                                                                                                                                                                                              |
| phosphatidylserine synthase 1                                                                                                                                                                                                                                                   |
| protein tyrosine phosphatase, receptor type, E                                                                                                                                                                                                                                  |
| RAB10, member RAS oncogene family                                                                                                                                                                                                                                               |
| fasciculation and elongation protein zeta 2 (zygin II)                                                                                                                                                                                                                          |
| CDC like kinase 4                                                                                                                                                                                                                                                               |
| CDC like kinase 4                                                                                                                                                                                                                                                               |
| poly A binding protein, cytoplasmic 2                                                                                                                                                                                                                                           |
| ring finger protein 141                                                                                                                                                                                                                                                         |
| sphingomyelin phosphodiesterase 2, neutral                                                                                                                                                                                                                                      |
| splicing factor, arginine/serine-rich 14                                                                                                                                                                                                                                        |
| transcription elongation factor B (SIII), polypeptide 3                                                                                                                                                                                                                         |
| lysophospholipase 1                                                                                                                                                                                                                                                             |
| lysophospholipase 1                                                                                                                                                                                                                                                             |
| lysophospholipase 1                                                                                                                                                                                                                                                             |
| A kinase (PRKA) anchor protein 8-like                                                                                                                                                                                                                                           |
| laminin B1 subunit 1                                                                                                                                                                                                                                                            |
| phosphomannomutase 2                                                                                                                                                                                                                                                            |
| GIPC PDZ domain containing family, member 2                                                                                                                                                                                                                                     |
| SET domain containing 4                                                                                                                                                                                                                                                         |
| endothelial differentiation sphingolipid G-protein-coupled receptor 1                                                                                                                                                                                                           |
| H2A histone family, member Z                                                                                                                                                                                                                                                    |
| heat shock 70kD protein 5 (glucose-regulated protein)                                                                                                                                                                                                                           |
| cytoskeleton-associated protein 4                                                                                                                                                                                                                                               |
| poly (ADP-ribose) polymerase family, member 1                                                                                                                                                                                                                                   |
| similar to Transcription factor Dp-1 (E2F dimerization partner 1) (DRTF1-polypeptide 1) /// similar to Transcription factor Dp-1 (E2F dimerization partner 1) (DRTF1-polypeptide 1) /// similar to Transcription factor Dp-1 (E2F dimerization partner 1) (DRTF1-polypeptide 1) |
| similar to Transcription factor Dp-1 (E2F dimerization partner 1) (DRTF1-polypeptide 1) /// similar to Transcription factor Dp-1 (E2F dimerization partner 1) (DRTF1-polypeptide 1) /// similar to Transcription factor Dp-1 (E2F dimerization partner 1) (DRTF1-polypeptide 1) |
| DNA segment, Chr 10, Wayne State University 52, expressed                                                                                                                                                                                                                       |
| budding uninhibited by benzimidazoles 3 homolog (S. cerevisiae)                                                                                                                                                                                                                 |
| DEAD (Asp-Glu-Ala-Asp) box polypeptide 17                                                                                                                                                                                                                                       |
| cathepsin L                                                                                                                                                                                                                                                                     |
| transketolase                                                                                                                                                                                                                                                                   |
| ring finger protein 13                                                                                                                                                                                                                                                          |
| ring finger protein 13                                                                                                                                                                                                                                                          |
| stromal cell derived factor 2                                                                                                                                                                                                                                                   |
| outer dense fiber of sperm tails 1                                                                                                                                                                                                                                              |
| neuroblastoma, suppression of tumorigenicity 1                                                                                                                                                                                                                                  |
| leucine-rich repeats and immunoglobulin-like domains 1                                                                                                                                                                                                                          |
| RIKEN cDNA 2500002L14 gene                                                                                                                                                                                                                                                      |
| napsin A aspartic peptidase                                                                                                                                                                                                                                                     |
| Cbp/p300-interacting transactivator, with Glu/Asp-rich carboxy-terminal domain, 2 /// similar to Cbp/p300-interacting transactivator, with Glu/Asp-rich carboxy-terminal domain, 2                                                                                              |
| delta-like 1 homolog (Drosophila)                                                                                                                                                                                                                                               |
| COP9 (constitutive photomorphogenic) homolog, subunit 4 (Arabidopsis thaliana)                                                                                                                                                                                                  |
| nudix (nucleotide diphosphate linked moiety X)-type motif 3                                                                                                                                                                                                                     |
| phosphatase, orphan 2                                                                                                                                                                                                                                                           |
| growth arrest and DNA-damage-inducible 45 gamma                                                                                                                                                                                                                                 |
| SUB1 homolog (S. cerevisia                                                                                                                                                                                                                                                      |
| nuclear receptor subfamily 1, group H, member 2                                                                                                                                                                                                                                 |

|                                                        |
|--------------------------------------------------------|
| vasodilator-stimulated phosphoprotein                  |
| ATX1 (antioxidant protein 1) homolog 1 (yeast)         |
| plasminogen                                            |
| ubiquinol-cytochrome c reductase core protein 1        |
| lactate dehydrogenase B                                |
| flavin containing monooxygenase 1                      |
| proteasome (prosome, macropain) subunit, beta type 6   |
| tenascin C                                             |
| sequestosome 1                                         |
| protein tyrosine phosphatase, non-receptor type 2      |
| autophagy-related 12 (yeast)                           |
| RIKEN cDNA 4833420G17 gene                             |
| ubiquinol cytochrome c reductase core protein 2        |
| ribonucleotide reductase M2                            |
| ubiquilin 2                                            |
| golgi-specific brefeldin A-resistance factor 1         |
| acetyl-Coenzyme A acyltransferase 1B                   |
| holocytochrome c synthetase                            |
| cytoplasmic FMR1 interacting protein 2                 |
| ATP-binding cassette, sub-family F (GCN20), member 2   |
| RIKEN cDNA 2610507L03 gene                             |
| src family associated phosphoprotein 2                 |
| retinol dehydrogenase 16                               |
| homer homolog 3 (Drosophila)                           |
| DEAD (Asp-Glu-Ala-Asp) box polypeptide 49              |
| cell death-inducing DFFA-like effector c               |
| PRP4 pre-mRNA processing factor 4 homolog B (yeast)    |
| CCR4-NOT transcription complex, subunit 3              |
| mitochondrial ribosomal protein L13                    |
| potassium channel, subfamily K, member 3               |
| interleukin 4 receptor, alpha                          |
| methylmalonyl CoA epimerase                            |
| nuclear receptor coactivator 3                         |
| chemokine (C-X-C motif) ligand 13                      |
| choline kinase beta                                    |
| choline kinase beta                                    |
| Ras association (RalGDS/AF-6) domain family 5          |
| interleukin 16                                         |
| RIKEN cDNA 4833408C14 gene                             |
| ribonuclease H1                                        |
| twisted gastrulation homolog 1 (Drosophila)            |
| testis specific protein kinase 1                       |
| thiopurine methyltransferase                           |
| THAP domain containing 7                               |
| microtubule-associated protein, RP/EB family, member 2 |
| ligand of numb-protein X 1                             |
| general transcription factor II H, polypeptide 4       |
| G protein-coupled receptor kinase 6                    |
| myomesin 2                                             |
| RIKEN cDNA 1810037C20 gene                             |
| tuftelin 1                                             |
| WNT1 inducible signaling pathway protein 1             |
| FUS interacting protein (serine-arginine rich) 1       |

|                                                                                                                                                                                                                                                                                                                                                                                              |
|----------------------------------------------------------------------------------------------------------------------------------------------------------------------------------------------------------------------------------------------------------------------------------------------------------------------------------------------------------------------------------------------|
| N-myristoyltransferase 1                                                                                                                                                                                                                                                                                                                                                                     |
| ankyrin repeat domain 1 (cardiac muscle)                                                                                                                                                                                                                                                                                                                                                     |
| pyruvate dehydrogenase kinase, isoenzyme 4                                                                                                                                                                                                                                                                                                                                                   |
| nuclear factor of activated T-cells, cytoplasmic, calcineurin-dependent 3                                                                                                                                                                                                                                                                                                                    |
| abhydrolase domain containing 5                                                                                                                                                                                                                                                                                                                                                              |
| phospholipid scramblase 2                                                                                                                                                                                                                                                                                                                                                                    |
| ankyrin repeat and FYVE domain containing 1                                                                                                                                                                                                                                                                                                                                                  |
| RIKEN cDNA 2610002J02 gene                                                                                                                                                                                                                                                                                                                                                                   |
| RIKEN cDNA 2610002J02 gene                                                                                                                                                                                                                                                                                                                                                                   |
| mitochondrial ribosomal protein L9                                                                                                                                                                                                                                                                                                                                                           |
| nicolin 1                                                                                                                                                                                                                                                                                                                                                                                    |
| golgi autoantigen, golgin subfamily a, 4                                                                                                                                                                                                                                                                                                                                                     |
| myeloid leukemia factor 1                                                                                                                                                                                                                                                                                                                                                                    |
| SWI/SNF related, matrix associated, actin dependent regulator of chromatin, subfamily c, member 1                                                                                                                                                                                                                                                                                            |
| 3-phosphoinositide dependent protein kinase-1                                                                                                                                                                                                                                                                                                                                                |
| caspase 1                                                                                                                                                                                                                                                                                                                                                                                    |
| ficolin A                                                                                                                                                                                                                                                                                                                                                                                    |
| metal response element binding transcription factor 2                                                                                                                                                                                                                                                                                                                                        |
| procollagen, type IX, alpha 3                                                                                                                                                                                                                                                                                                                                                                |
| RIKEN cDNA 1500034J01 gene                                                                                                                                                                                                                                                                                                                                                                   |
| RIKEN cDNA 1500034J01 gene                                                                                                                                                                                                                                                                                                                                                                   |
| parkin                                                                                                                                                                                                                                                                                                                                                                                       |
| orthopedia homolog (Drosophila)                                                                                                                                                                                                                                                                                                                                                              |
| mast cell protease, pseudogene 1                                                                                                                                                                                                                                                                                                                                                             |
| gene model 1419, (NCBI) /// immunoglobulin kappa chain variable 4-77 /// similar to Ig kappa chain V-IV region S107B precursor /// similar to Ig kappa chain V-IV region S107B precursor /// similar to Ig kappa chain V-IV region S107B precursor                                                                                                                                           |
| Cytochrome P450, family 51                                                                                                                                                                                                                                                                                                                                                                   |
| parathyroid hormone                                                                                                                                                                                                                                                                                                                                                                          |
| activator of yeast meiotic promoters 1                                                                                                                                                                                                                                                                                                                                                       |
| ---                                                                                                                                                                                                                                                                                                                                                                                          |
| roundabout homolog 3 (Drosophila)                                                                                                                                                                                                                                                                                                                                                            |
| GNAS (guanine nucleotide binding protein, alpha stimulating) complex locus                                                                                                                                                                                                                                                                                                                   |
| Ras-like without CAAX 2                                                                                                                                                                                                                                                                                                                                                                      |
| cytochrome P450, family 2, subfamily c, polypeptide 38                                                                                                                                                                                                                                                                                                                                       |
| insulinoma-associated 1                                                                                                                                                                                                                                                                                                                                                                      |
| DNA segment, Chr 15, ERATO Doi 50, expressed                                                                                                                                                                                                                                                                                                                                                 |
| homeo box A3                                                                                                                                                                                                                                                                                                                                                                                 |
| Kruppel-like factor 12                                                                                                                                                                                                                                                                                                                                                                       |
| matrilin 3                                                                                                                                                                                                                                                                                                                                                                                   |
| SET and MYND domain containing 5                                                                                                                                                                                                                                                                                                                                                             |
| ---                                                                                                                                                                                                                                                                                                                                                                                          |
| oviductal glycoprotein 1                                                                                                                                                                                                                                                                                                                                                                     |
| splicing factor, arginine/serine-rich 4 (SRp75)                                                                                                                                                                                                                                                                                                                                              |
| ---                                                                                                                                                                                                                                                                                                                                                                                          |
| sparc/osteonectin, cwcv and kazal-like domains proteoglycan 2                                                                                                                                                                                                                                                                                                                                |
| major urinary protein 1 /// major urinary protein 2 /// major urinary protein 3 /// major urinary protein 4 /// major urinary protein 5 /// similar to alpha-2u-globulin V precursor - mouse /// similar to Major urinary protein 4 precursor (MUP 4) /// similar to Major urinary protein 4 precursor (MUP 4) /// similar to major urinary protein 4 /// similar to alpha-2u globulin PGCL3 |
| NADH dehydrogenase (ubiquinone) 1 alpha subcomplex, 3                                                                                                                                                                                                                                                                                                                                        |
| ---                                                                                                                                                                                                                                                                                                                                                                                          |
| potassium channel tetramerisation domain containing 17                                                                                                                                                                                                                                                                                                                                       |
| ---                                                                                                                                                                                                                                                                                                                                                                                          |
| ---                                                                                                                                                                                                                                                                                                                                                                                          |
| Transcribed locus, weakly similar to XP_576435.1 PREDICTED: similar to ORF4 [Rattus norvegicus]                                                                                                                                                                                                                                                                                              |
| thioredoxin-like 2                                                                                                                                                                                                                                                                                                                                                                           |



|                                                                                                                                                                                                                                                                  |
|------------------------------------------------------------------------------------------------------------------------------------------------------------------------------------------------------------------------------------------------------------------|
| membrane-spanning 4-domains, subfamily A, member 6C                                                                                                                                                                                                              |
| prostaglandin D2 synthase (brain)                                                                                                                                                                                                                                |
| expressed sequence C76472                                                                                                                                                                                                                                        |
| ---                                                                                                                                                                                                                                                              |
| myosin, heavy polypeptide 9, non-muscle                                                                                                                                                                                                                          |
| ribosomal protein L13                                                                                                                                                                                                                                            |
| Transcribed locus                                                                                                                                                                                                                                                |
| ---                                                                                                                                                                                                                                                              |
| ---                                                                                                                                                                                                                                                              |
| tissue specific transplantation antigen P35B                                                                                                                                                                                                                     |
| angiopoietin-like 4                                                                                                                                                                                                                                              |
| nucleolar and spindle associated protein 1                                                                                                                                                                                                                       |
| synaptotagmin III                                                                                                                                                                                                                                                |
| RAB, member of RAS oncogene family-like 4                                                                                                                                                                                                                        |
| ankyrin repeat domain 17                                                                                                                                                                                                                                         |
| ---                                                                                                                                                                                                                                                              |
| similar to Hippocalcin-like protein 1 (Visinin-like protein 3) (VILIP-3) (Neural visinin-like protein 3) (NVL-3) (NVP-3)                                                                                                                                         |
| keratin complex 1, acidic, gene 19                                                                                                                                                                                                                               |
| ---                                                                                                                                                                                                                                                              |
| Lysosomal acid lipase 1                                                                                                                                                                                                                                          |
| cytochrome c oxidase subunit IV isoform 1                                                                                                                                                                                                                        |
| ---                                                                                                                                                                                                                                                              |
| ribosomal protein S12 /// similar to ribosomal protein S12 /// similar to ribosomal protein S12 /// similar to 40S ribosomal protein S12 /// similar to ribosomal protein S12 /// similar to ribosomal protein S12                                               |
| Ligatin                                                                                                                                                                                                                                                          |
| mitochondrial ribosomal protein S25                                                                                                                                                                                                                              |
| ribosomal protein S17 /// similar to ribosomal protein S17 /// similar to 40S ribosomal protein S17                                                                                                                                                              |
| In vitro fertilized eggs cDNA, RIKEN full-length enriched library, clone:7420405G17 product:unclassifiable, full insert sequence                                                                                                                                 |
| ring finger protein 20                                                                                                                                                                                                                                           |
| alkaline phosphatase 5                                                                                                                                                                                                                                           |
| zinc finger protein 568                                                                                                                                                                                                                                          |
| ATP synthase, H+ transporting, mitochondrial F0 complex, subunit c (subunit 9), isoform 2 /// similar to ATP synthase, H+ transporting, mitochondrial F0 complex, subunit c (subunit 9), isoform 2                                                               |
| expressed sequence C78893                                                                                                                                                                                                                                        |
| expressed sequence C79246                                                                                                                                                                                                                                        |
| ---                                                                                                                                                                                                                                                              |
| DNA segment, Chr 13, ERATO Doi 37, expressed                                                                                                                                                                                                                     |
| DNA segment, Chr 13, ERATO Doi 205, expressed                                                                                                                                                                                                                    |
| expressed sequence C77137                                                                                                                                                                                                                                        |
| RIKEN cDNA 4933434E20 gene                                                                                                                                                                                                                                       |
| similar to odorant binding protein 1a /// similar to odorant binding protein 1a /// similar to odorant binding protein 1a                                                                                                                                        |
| Enolase 3, beta muscle                                                                                                                                                                                                                                           |
| splicing factor proline/glutamine rich (polypyrimidine tract binding protein associated)                                                                                                                                                                         |
| estrogen related receptor, alpha                                                                                                                                                                                                                                 |
| insulin receptor                                                                                                                                                                                                                                                 |
| alkaline phosphatase 3, intestine, not Mn requiring                                                                                                                                                                                                              |
| interferon alpha family, gene 1 /// interferon alpha family, gene 5 /// interferon alpha family, gene 9                                                                                                                                                          |
| interferon alpha family, gene 1 /// interferon alpha family, gene 2 /// interferon alpha family, gene 5 /// interferon alpha family, gene 7 /// interferon alpha family, gene 9 /// interferon alpha family, gene B /// interferon alpha 6T /// alpha-interferon |
| /// interferon alpha family, gene 12 /// interferon alpha 8/6 precursor; IFNa8/6 /// interferon alpha 14                                                                                                                                                         |
| alpha-interferon                                                                                                                                                                                                                                                 |
| adrenergic receptor, beta 1                                                                                                                                                                                                                                      |
| similar to Ig heavy chain V region M167 precursor                                                                                                                                                                                                                |
| ---                                                                                                                                                                                                                                                              |
| immunoglobulin kappa chain variable 8 (V8)                                                                                                                                                                                                                       |
| similar to Ig kappa chain V-V region MOPC 173                                                                                                                                                                                                                    |
| immunoglobulin kappa chain variable 28 (V28) /// immunoglobulin kappa chain variable 8 (V8) /// immunoglobulin kappa chain /// immunoglobulin kappa chain variable 21 (V21)                                                                                      |

|                                                                                                                                                                                                                                                                                                                                                                                                                                                                                                                                                                                                                                                                                                                                                                                                                                                                                                                                                                                                                                                                                                                                                                                                                                                                 |
|-----------------------------------------------------------------------------------------------------------------------------------------------------------------------------------------------------------------------------------------------------------------------------------------------------------------------------------------------------------------------------------------------------------------------------------------------------------------------------------------------------------------------------------------------------------------------------------------------------------------------------------------------------------------------------------------------------------------------------------------------------------------------------------------------------------------------------------------------------------------------------------------------------------------------------------------------------------------------------------------------------------------------------------------------------------------------------------------------------------------------------------------------------------------------------------------------------------------------------------------------------------------|
| immunoglobulin kappa chain variable 10-95                                                                                                                                                                                                                                                                                                                                                                                                                                                                                                                                                                                                                                                                                                                                                                                                                                                                                                                                                                                                                                                                                                                                                                                                                       |
| ---                                                                                                                                                                                                                                                                                                                                                                                                                                                                                                                                                                                                                                                                                                                                                                                                                                                                                                                                                                                                                                                                                                                                                                                                                                                             |
| immunoglobulin heavy chain 4 (serum IgG1) /// immunoglobulin heavy chain 6 (heavy chain of IgM) /// immunoglobulin heavy chain (V7183 family) /// immunoglobulin heavy chain (J558 family) /// similar to immunoglobulin heavy chain variable region /// immunoglobulin heavy chain 1a (serum IgG2a) /// Immunoglobulin heavy chain (gamma polypeptide) /// Ig heavy chain V region /// similar to Ig heavy chain V region 5-84 precursor /// similar to immunoglobulin mu-chain /// similar to Ig heavy chain V region 5-84 precursor /// similar to Ig heavy chain V region RF precursor /// similar to Ig heavy chain V region 345 precursor /// similar to Ig heavy chain V region 5-84 precursor /// similar to Ig heavy chain V region 345 precursor /// similar to Ig heavy chain V region 5-84 precursor /// similar to Ig heavy chain V region 345 precursor /// similar to Ig heavy chain V region 5-76 precursor /// similar to Ig heavy chain V region 7-39 precursor /// similar to Ig heavy chain V region 5-84 precursor /// similar to Ig heavy chain V region 5-76 precursor /// similar to Ig heavy chain V region 5-76 precursor /// similar to Ig heavy chain V region 7-39 precursor /// similar to Ig heavy chain V region 5-84 precursor |
| ---                                                                                                                                                                                                                                                                                                                                                                                                                                                                                                                                                                                                                                                                                                                                                                                                                                                                                                                                                                                                                                                                                                                                                                                                                                                             |
| histocompatibility 2, D region locus 1 /// histocompatibility 2, D region /// histocompatibility 2, T region locus 22 /// MHC (A.CA/J(H-2K-f) class I antigen /// similar to H-2 class I histocompatibility antigen, L-D alpha chain precursor /// similar to MHC class I antigen precursor /// similar to H-2 class I histocompatibility antigen, D-K alpha chain precursor (H-2D(K)) /// similar to H-2 class I histocompatibility antigen, D-K alpha chain precursor (H-2D(K)) /// similar to H-2 class I histocompatibility antigen, L-D alpha chain precursor                                                                                                                                                                                                                                                                                                                                                                                                                                                                                                                                                                                                                                                                                              |
| ---                                                                                                                                                                                                                                                                                                                                                                                                                                                                                                                                                                                                                                                                                                                                                                                                                                                                                                                                                                                                                                                                                                                                                                                                                                                             |
| small nuclear ribonucleoprotein N /// similar to small nuclear ribonucleoparticle-associated protein                                                                                                                                                                                                                                                                                                                                                                                                                                                                                                                                                                                                                                                                                                                                                                                                                                                                                                                                                                                                                                                                                                                                                            |
| gap junction membrane channel protein alpha 10                                                                                                                                                                                                                                                                                                                                                                                                                                                                                                                                                                                                                                                                                                                                                                                                                                                                                                                                                                                                                                                                                                                                                                                                                  |
| vomeronasal 1 receptor, B5                                                                                                                                                                                                                                                                                                                                                                                                                                                                                                                                                                                                                                                                                                                                                                                                                                                                                                                                                                                                                                                                                                                                                                                                                                      |
| vomeronasal 1 receptor, B6 /// vomeronasal 1 receptor, B5                                                                                                                                                                                                                                                                                                                                                                                                                                                                                                                                                                                                                                                                                                                                                                                                                                                                                                                                                                                                                                                                                                                                                                                                       |
| vomeronasal 1 receptor, B6                                                                                                                                                                                                                                                                                                                                                                                                                                                                                                                                                                                                                                                                                                                                                                                                                                                                                                                                                                                                                                                                                                                                                                                                                                      |
| olfactory receptor 92                                                                                                                                                                                                                                                                                                                                                                                                                                                                                                                                                                                                                                                                                                                                                                                                                                                                                                                                                                                                                                                                                                                                                                                                                                           |
| olfactory receptor 93                                                                                                                                                                                                                                                                                                                                                                                                                                                                                                                                                                                                                                                                                                                                                                                                                                                                                                                                                                                                                                                                                                                                                                                                                                           |
| olfactory receptor 94                                                                                                                                                                                                                                                                                                                                                                                                                                                                                                                                                                                                                                                                                                                                                                                                                                                                                                                                                                                                                                                                                                                                                                                                                                           |
| nuclear receptor subfamily 1, group I, member 3                                                                                                                                                                                                                                                                                                                                                                                                                                                                                                                                                                                                                                                                                                                                                                                                                                                                                                                                                                                                                                                                                                                                                                                                                 |
| acyl-CoA synthetase medium-chain family member 3                                                                                                                                                                                                                                                                                                                                                                                                                                                                                                                                                                                                                                                                                                                                                                                                                                                                                                                                                                                                                                                                                                                                                                                                                |
| exonuclease domain containing 1                                                                                                                                                                                                                                                                                                                                                                                                                                                                                                                                                                                                                                                                                                                                                                                                                                                                                                                                                                                                                                                                                                                                                                                                                                 |
| RIKEN cDNA 2810432D09 gene                                                                                                                                                                                                                                                                                                                                                                                                                                                                                                                                                                                                                                                                                                                                                                                                                                                                                                                                                                                                                                                                                                                                                                                                                                      |
| mitogen-activated protein kinase kinase kinase kinase 4                                                                                                                                                                                                                                                                                                                                                                                                                                                                                                                                                                                                                                                                                                                                                                                                                                                                                                                                                                                                                                                                                                                                                                                                         |
| guanine nucleotide binding protein, alpha 11                                                                                                                                                                                                                                                                                                                                                                                                                                                                                                                                                                                                                                                                                                                                                                                                                                                                                                                                                                                                                                                                                                                                                                                                                    |
| nucleobindin 2                                                                                                                                                                                                                                                                                                                                                                                                                                                                                                                                                                                                                                                                                                                                                                                                                                                                                                                                                                                                                                                                                                                                                                                                                                                  |
| potassium intermediate/small conductance calcium-activated channel, subfamily N, member 4                                                                                                                                                                                                                                                                                                                                                                                                                                                                                                                                                                                                                                                                                                                                                                                                                                                                                                                                                                                                                                                                                                                                                                       |
| threonyl-tRNA synthetase-like 1                                                                                                                                                                                                                                                                                                                                                                                                                                                                                                                                                                                                                                                                                                                                                                                                                                                                                                                                                                                                                                                                                                                                                                                                                                 |
| aquaporin 8                                                                                                                                                                                                                                                                                                                                                                                                                                                                                                                                                                                                                                                                                                                                                                                                                                                                                                                                                                                                                                                                                                                                                                                                                                                     |
| presenilin 1                                                                                                                                                                                                                                                                                                                                                                                                                                                                                                                                                                                                                                                                                                                                                                                                                                                                                                                                                                                                                                                                                                                                                                                                                                                    |
| Mpv17 transgene, kidney disease mutant                                                                                                                                                                                                                                                                                                                                                                                                                                                                                                                                                                                                                                                                                                                                                                                                                                                                                                                                                                                                                                                                                                                                                                                                                          |
| placental protein 11 related                                                                                                                                                                                                                                                                                                                                                                                                                                                                                                                                                                                                                                                                                                                                                                                                                                                                                                                                                                                                                                                                                                                                                                                                                                    |
| v-maf musculoaponeurotic fibrosarcoma oncogene family, protein B (avian)                                                                                                                                                                                                                                                                                                                                                                                                                                                                                                                                                                                                                                                                                                                                                                                                                                                                                                                                                                                                                                                                                                                                                                                        |
| N-acetylglucosamine-1-phosphate transferase, alpha and beta subunits                                                                                                                                                                                                                                                                                                                                                                                                                                                                                                                                                                                                                                                                                                                                                                                                                                                                                                                                                                                                                                                                                                                                                                                            |
| FK506 binding protein-like                                                                                                                                                                                                                                                                                                                                                                                                                                                                                                                                                                                                                                                                                                                                                                                                                                                                                                                                                                                                                                                                                                                                                                                                                                      |
| nuclear receptor binding protein 2                                                                                                                                                                                                                                                                                                                                                                                                                                                                                                                                                                                                                                                                                                                                                                                                                                                                                                                                                                                                                                                                                                                                                                                                                              |
| ST3 beta-galactoside alpha-2,3-sialyltransferase 6                                                                                                                                                                                                                                                                                                                                                                                                                                                                                                                                                                                                                                                                                                                                                                                                                                                                                                                                                                                                                                                                                                                                                                                                              |
| nuclear factor of activated T-cells, cytoplasmic, calcineurin-dependent 1                                                                                                                                                                                                                                                                                                                                                                                                                                                                                                                                                                                                                                                                                                                                                                                                                                                                                                                                                                                                                                                                                                                                                                                       |
| dystrobrevin, beta                                                                                                                                                                                                                                                                                                                                                                                                                                                                                                                                                                                                                                                                                                                                                                                                                                                                                                                                                                                                                                                                                                                                                                                                                                              |
| SEC24 related gene family, member B (S. cerevisiae)                                                                                                                                                                                                                                                                                                                                                                                                                                                                                                                                                                                                                                                                                                                                                                                                                                                                                                                                                                                                                                                                                                                                                                                                             |
| reproductive homeobox 6                                                                                                                                                                                                                                                                                                                                                                                                                                                                                                                                                                                                                                                                                                                                                                                                                                                                                                                                                                                                                                                                                                                                                                                                                                         |
| cardiomyopathy associated 1                                                                                                                                                                                                                                                                                                                                                                                                                                                                                                                                                                                                                                                                                                                                                                                                                                                                                                                                                                                                                                                                                                                                                                                                                                     |
| periaxin                                                                                                                                                                                                                                                                                                                                                                                                                                                                                                                                                                                                                                                                                                                                                                                                                                                                                                                                                                                                                                                                                                                                                                                                                                                        |
| intraflagellar transport 81 homolog (Chlamydomonas)                                                                                                                                                                                                                                                                                                                                                                                                                                                                                                                                                                                                                                                                                                                                                                                                                                                                                                                                                                                                                                                                                                                                                                                                             |
| arachidonate 12-lipoxygenase, 12R type                                                                                                                                                                                                                                                                                                                                                                                                                                                                                                                                                                                                                                                                                                                                                                                                                                                                                                                                                                                                                                                                                                                                                                                                                          |
| G protein-coupled receptor kinase 5                                                                                                                                                                                                                                                                                                                                                                                                                                                                                                                                                                                                                                                                                                                                                                                                                                                                                                                                                                                                                                                                                                                                                                                                                             |
| interleukin 6                                                                                                                                                                                                                                                                                                                                                                                                                                                                                                                                                                                                                                                                                                                                                                                                                                                                                                                                                                                                                                                                                                                                                                                                                                                   |
| regulatory factor X, 2 (influences HLA class II expression)                                                                                                                                                                                                                                                                                                                                                                                                                                                                                                                                                                                                                                                                                                                                                                                                                                                                                                                                                                                                                                                                                                                                                                                                     |
| undifferentiated embryonic cell transcription factor 1                                                                                                                                                                                                                                                                                                                                                                                                                                                                                                                                                                                                                                                                                                                                                                                                                                                                                                                                                                                                                                                                                                                                                                                                          |
| synaptogyrin 1                                                                                                                                                                                                                                                                                                                                                                                                                                                                                                                                                                                                                                                                                                                                                                                                                                                                                                                                                                                                                                                                                                                                                                                                                                                  |
| ubiquitously transcribed tetratricopeptide repeat gene, X chromosome                                                                                                                                                                                                                                                                                                                                                                                                                                                                                                                                                                                                                                                                                                                                                                                                                                                                                                                                                                                                                                                                                                                                                                                            |
| periplakin                                                                                                                                                                                                                                                                                                                                                                                                                                                                                                                                                                                                                                                                                                                                                                                                                                                                                                                                                                                                                                                                                                                                                                                                                                                      |
| hypothetical protein D930020L01                                                                                                                                                                                                                                                                                                                                                                                                                                                                                                                                                                                                                                                                                                                                                                                                                                                                                                                                                                                                                                                                                                                                                                                                                                 |

|                                                                                  |
|----------------------------------------------------------------------------------|
| RAB GTPase activating protein 1-like                                             |
| carboxypeptidase X 2 (M14 family)                                                |
| carboxypeptidase X 2 (M14 family)                                                |
| linker for activation of T cells                                                 |
| N-myristoyltransferase 2                                                         |
| hyaluronoglucosaminidase 1 /// N-acetyltransferase 6                             |
| cAMP responsive element binding protein 3-like 1                                 |
| similar to solute carrier family 39 (zinc transporter), member 9                 |
| RIKEN cDNA 4833442J19 gene                                                       |
| ---                                                                              |
| v-myc myelocytomatosis viral oncogene homolog 1, lung carcinoma derived (avian)  |
| CD28 antigen                                                                     |
| achaete-scute complex homolog-like 1 (Drosophila)                                |
| B-cell leukemia/lymphoma 3                                                       |
| peroxisome proliferative activated receptor, gamma, coactivator 1 alpha          |
| transcription factor 7-like 2, T-cell specific, HMG-box                          |
| period homolog 3 (Drosophila)                                                    |
| ets homologous factor                                                            |
| testicular serine protease 1                                                     |
| ubiquitin protein ligase E3 component n-recognin 1                               |
| calcium/calmodulin-dependent serine protein kinase (MAGUK family)                |
| advillin                                                                         |
| interleukin 27 receptor, alpha                                                   |
| transient receptor potential cation channel, subfamily M, member 1               |
| prefoldin 2                                                                      |
| cDNA sequence AF067063                                                           |
| similar to 2-cell-stage, variable group, member 3                                |
| oncostatin M receptor                                                            |
| T-box 15                                                                         |
| Pbx/knotted 1 homeobox                                                           |
| stimulated by retinoic acid gene 6                                               |
| 3-monooxygenase/tryptophan 5-monooxygenase activation protein, gamma polypeptide |
| growth factor independent 1B                                                     |
| procollagen, type XIII, alpha 1                                                  |
| procollagen, type XIII, alpha 1                                                  |
| zinc finger protein 143                                                          |
| schlafen 1                                                                       |
| myogenic factor 6                                                                |
| inhibin alpha                                                                    |
| UDP-Gal:betaGalNAc beta 1,3-galactosyltransferase, polypeptide 4                 |
| REX1, RNA exonuclease 1 homolog (S. cerevisiae)                                  |
| arachidonate lipoxygenase, epidermal                                             |
| DNA segment, Chr 11, Brigham & Women's Genetics 0280e expressed                  |
| CD160 antigen                                                                    |
| ATPase, H+ transporting, lysosomal V0 subunit A2                                 |
| histocompatibility 2, O region alpha locus                                       |
| zinc finger protein 185                                                          |
| zinc finger protein 26                                                           |
| peptidylprolyl isomerase E (cyclophilin E)                                       |
| ubiquitin-activating enzyme E1-like                                              |
| protocadherin 7                                                                  |
| tumor necrosis factor receptor superfamily, member 7                             |
| tumor necrosis factor receptor superfamily, member 7                             |

|                                                                             |
|-----------------------------------------------------------------------------|
| T-cell lymphoma invasion and metastasis 1                                   |
| mannan-binding lectin serine peptidase 1                                    |
| O-6-methylguanine-DNA methyltransferase                                     |
| v-raf murine sarcoma 3611 viral oncogene homolog                            |
| CD247 antigen                                                               |
| CD247 antigen                                                               |
| complement receptor 2                                                       |
| arachidonate 12-lipoxygenase                                                |
| coagulation factor IX                                                       |
| growth arrest and DNA-damage-inducible 45 alpha                             |
| zinc finger protein, subfamily 1A, 1 (Ikaros)                               |
| zinc finger protein, subfamily 1A, 1 (Ikaros)                               |
| potassium voltage-gated channel, shaker-related subfamily, member 5         |
| proprotein convertase subtilisin/kexin type 2                               |
| zinc finger protein 535                                                     |
| nerve growth factor, beta                                                   |
| protein kinase C, alpha                                                     |
| receptor-associated protein of the synapse                                  |
| capping protein (actin filament) muscle Z-line, alpha 3                     |
| branched chain ketoacid dehydrogenase E1, beta polypeptide                  |
| zinc finger protein 61                                                      |
| zinc finger protein 61                                                      |
| G protein-coupled receptor 37-like 1                                        |
| heparan sulfate 2-O-sulfotransferase 1                                      |
| doublecortin                                                                |
| tubby-like protein 3                                                        |
| zinc finger protein 326                                                     |
| chemokine (C-C motif) ligand 22                                             |
| glycoprotein 9 (platelet)                                                   |
| RIKEN cDNA 1500034J01 gene                                                  |
| GTP cyclohydrolase 1                                                        |
| solute carrier family 2 (facilitated glucose transporter), member 4         |
| cirrhosis, autosomal recessive 1A (human)                                   |
| calpain 5                                                                   |
| vesicle-associated membrane protein 4                                       |
| ST8 alpha-N-acetyl-neuraminide alpha-2,8-sialyltransferase 4                |
| sorting nexin 12                                                            |
| sorting nexin 12                                                            |
| adenylate cyclase 6                                                         |
| UDP-glucose dehydrogenase                                                   |
| huntingtin-associated protein 1                                             |
| DnaJ (Hsp40) homolog, subfamily C, member 4                                 |
| neutrophil cytosolic factor 2                                               |
| amine oxidase, copper containing 3                                          |
| caspase 8                                                                   |
| cell death-inducing DNA fragmentation factor, alpha subunit-like effector B |
| allograft inflammatory factor 1                                             |
| suppression of tumorigenicity 5                                             |
| Unc-51 like kinase 1 (C. elegans)                                           |
| epsin 2                                                                     |
| docking protein 2                                                           |
| potassium channel, subfamily K, member 1                                    |
| transmembrane protein 131                                                   |

|                                                                                                   |
|---------------------------------------------------------------------------------------------------|
| Fc receptor, IgG, low affinity IIb                                                                |
| phosphodiesterase 9A                                                                              |
| myc induced nuclear antigen                                                                       |
| galactosidase, alpha                                                                              |
| N-ethylmaleimide sensitive fusion protein                                                         |
| CD320 antigen                                                                                     |
| transcription elongation factor A (SII), 3                                                        |
| left right determination factor 1                                                                 |
| excision repair cross-complementing rodent repair deficiency, complementation group 3             |
| similar to hypothetical protein MGC37588                                                          |
| ADP-ribosylhydrolase like 2                                                                       |
| ADP-ribosylhydrolase like 2                                                                       |
| carboxypeptidase A3, mast cell                                                                    |
| UDP-N-acetyl-alpha-D-galactosamine:polypeptide N-acetylgalactosaminyltransferase 10               |
| integrin beta 2                                                                                   |
| transcription factor 19                                                                           |
| WD repeat domain 23                                                                               |
| expressed sequence AU020772                                                                       |
| 5,10-methylenetetrahydrofolate reductase                                                          |
| Jun-B oncogene                                                                                    |
| Jun-B oncogene                                                                                    |
| Jun proto-oncogene related gene d1                                                                |
| resistin                                                                                          |
| RIKEN cDNA 2610208E05 gene                                                                        |
| dehydrogenase/reductase (SDR family) member 8                                                     |
| nuclear receptor subfamily 4, group A, member 1                                                   |
| immunoglobulin joining chain                                                                      |
| glutamyl aminopeptidase                                                                           |
| Down syndrome critical region gene 1-like 2                                                       |
| SET and MYND domain containing 5                                                                  |
| Purkinje cell protein 2 (L7)                                                                      |
| sarcospan                                                                                         |
| Ras association (RalGDS/AF-6) domain family 1                                                     |
| homeo box D4                                                                                      |
| acyl-CoA synthetase long-chain family member 4                                                    |
| aryl hydrocarbon receptor nuclear translocator-like                                               |
| RIKEN cDNA 5730593F17 gene                                                                        |
| SWI/SNF related, matrix associated, actin dependent regulator of chromatin, subfamily a, member 2 |
| WD repeat domain 43                                                                               |
| similar to ribosomal protein L24-like                                                             |
| growth associated protein 43                                                                      |
| crystallin, alpha A                                                                               |
| peripheral myelin protein                                                                         |
| intraflagellar transport 172 homolog (Chlamydomonas)                                              |
| core-binding factor, runt domain, alpha subunit 2, translocated to, 3 homolog (human)             |
| retinoid X receptor beta                                                                          |
| RNA binding protein gene with multiple splicing                                                   |
| expressed sequence AU014645                                                                       |
| interferon regulatory factor 1                                                                    |
| glioblastoma amplified sequence                                                                   |
| cell division cycle 45 homolog (S. cerevisiae)-like                                               |
| laminin, gamma 1                                                                                  |
| myelin-associated glycoprotein                                                                    |

|                                                                          |
|--------------------------------------------------------------------------|
| chymase 1, mast cell                                                     |
| chymase 1, mast cell                                                     |
| chymase 1, mast cell                                                     |
| LSM8 homolog, U6 small nuclear RNA associated (S. cerevisiae)            |
| heparan sulfate (glucosamine) 3-O-sulfotransferase 1                     |
| zinc finger protein 239                                                  |
| nucleoporin 107                                                          |
| LIM domain only 1                                                        |
| DnaJ (Hsp40) homolog, subfamily C, member 3                              |
| DnaJ (Hsp40) homolog, subfamily C, member 3                              |
| cytochrome P450, family 17, subfamily a, polypeptide 1                   |
| testis expressed gene 19                                                 |
| retinoic acid receptor, gamma                                            |
| RIKEN cDNA 2400010G15 gene                                               |
| UDP-glucuronate decarboxylase 1                                          |
| chemokine (C-C motif) ligand 3                                           |
| transducin-like enhancer of split 1, homolog of Drosophila E(spl)        |
| calsequestrin 1                                                          |
| forty-two-three domain containing 1                                      |
| solute carrier family 22 (organic anion/cation transporter), member 12   |
| myeloid differentiation primary response gene 88                         |
| microtubule-associated protein tau                                       |
| Exportin 7                                                               |
| Transcribed locus                                                        |
| F-box and WD-40 domain protein 4                                         |
| gap junction membrane channel protein alpha 3                            |
| Immunoglobulin kappa chain complex                                       |
| olfactory receptor 16                                                    |
| ---                                                                      |
| adrenergic receptor, alpha 2a                                            |
| similar to histone H2A                                                   |
| histone 2, H2be                                                          |
| bone morphogenetic protein 2                                             |
| contactin 4                                                              |
| ATP synthase, H+ transporting, mitochondrial F1F0 complex, subunit e     |
| ---                                                                      |
| deleted in colorectal carcinoma                                          |
| homeo box D13                                                            |
| NOBOX oogenesis homeobox                                                 |
| atonal homolog 1 (Drosophila)                                            |
| ---                                                                      |
| gap junction membrane channel protein beta 6                             |
| RAS protein-specific guanine nucleotide-releasing factor 2               |
| neurexophilin 1                                                          |
| fibroblast growth factor 11                                              |
| orosomuroid 3                                                            |
| histamine receptor H 1                                                   |
| potassium voltage-gated channel, shaker-related subfamily, beta member 3 |
| paired box gene 5                                                        |
| homeo box A6                                                             |
| homeo box A6                                                             |
| myc-like oncogene, s-myc protein                                         |
| adenomatosis polyposis coli 2                                            |

|                                                                                                                                                                                                                                                                                                                |
|----------------------------------------------------------------------------------------------------------------------------------------------------------------------------------------------------------------------------------------------------------------------------------------------------------------|
| olfactory receptor 138                                                                                                                                                                                                                                                                                         |
| dual-specificity tyrosine-(Y)-phosphorylation regulated kinase 1b                                                                                                                                                                                                                                              |
| gene model 1419, (NCBI) /// gene model 1502, (NCBI) /// immunoglobulin kappa chain variable 4-61 /// immunoglobulin kappa chain variable 4-69 /// similar to Ig kappa chain V-IV region S107B precursor /// immunoglobulin kappa chain variable 4-59 /// similar to Ig kappa chain V-IV region S107B precursor |
| receptor tyrosine kinase-like orphan receptor 1                                                                                                                                                                                                                                                                |
| tumor protein, translationally-controlled 1                                                                                                                                                                                                                                                                    |
| neural retina leucine zipper gene                                                                                                                                                                                                                                                                              |
| TGF-beta1-induced anti-apoptotic factor 2                                                                                                                                                                                                                                                                      |
| prospero-related homeobox 1                                                                                                                                                                                                                                                                                    |
| FYVE, RhoGEF and PH domain containing 3                                                                                                                                                                                                                                                                        |
| DnaJ (Hsp40) homolog, subfamily B, member 5                                                                                                                                                                                                                                                                    |
| cell adhesion molecule-related/down-regulated by oncogenes                                                                                                                                                                                                                                                     |
| chloride channel 1                                                                                                                                                                                                                                                                                             |
| sema domain, immunoglobulin domain (Ig), short basic domain, secreted, (semaphorin) 3 F                                                                                                                                                                                                                        |
| stanniocalcin 2                                                                                                                                                                                                                                                                                                |
| zinc finger protein 54                                                                                                                                                                                                                                                                                         |
| zinc finger protein 54                                                                                                                                                                                                                                                                                         |
| insulin-like growth factor 2 mRNA binding protein 1                                                                                                                                                                                                                                                            |
| fragile histidine triad gene                                                                                                                                                                                                                                                                                   |
| tumor necrosis factor                                                                                                                                                                                                                                                                                          |
| lymphotoxin A                                                                                                                                                                                                                                                                                                  |
| Bloom syndrome homolog (human)                                                                                                                                                                                                                                                                                 |
| asp (abnormal spindle)-like, microcephaly associated (Drosophila)                                                                                                                                                                                                                                              |
| GRB2-related adaptor protein 2                                                                                                                                                                                                                                                                                 |
| vesicle transport through interaction with t-SNAREs homolog 1A (yeast)                                                                                                                                                                                                                                         |
| kinesin light chain 2                                                                                                                                                                                                                                                                                          |
| transforming growth factor, beta receptor III                                                                                                                                                                                                                                                                  |
| cystatin F (leukocystatin)                                                                                                                                                                                                                                                                                     |
| carbohydrate sulfotransferase 2                                                                                                                                                                                                                                                                                |
| ICRFP703B1614Q5.5 gene                                                                                                                                                                                                                                                                                         |
| SFFV proviral integration 1                                                                                                                                                                                                                                                                                    |
| solute carrier family 11 (proton-coupled divalent metal ion transporters), member 2                                                                                                                                                                                                                            |
| homeo box A2                                                                                                                                                                                                                                                                                                   |
| MyoD family inhibitor domain containing                                                                                                                                                                                                                                                                        |
| early endosome antigen 1                                                                                                                                                                                                                                                                                       |
| ubiquitin specific peptidase 34                                                                                                                                                                                                                                                                                |
| ubiquitin specific peptidase 34                                                                                                                                                                                                                                                                                |
| surfactant associated protein D                                                                                                                                                                                                                                                                                |
| retinoic acid early transcript 1, alpha /// retinoic acid early transcript beta /// retinoic acid early transcript gamma /// retinoic acid early transcript delta /// retinoic acid early transcript 1E                                                                                                        |
| regulator of G-protein signaling 11                                                                                                                                                                                                                                                                            |
| glucokinase                                                                                                                                                                                                                                                                                                    |
| POU domain, class 3, transcription factor 1                                                                                                                                                                                                                                                                    |
| ryanodine receptor 2, cardiac                                                                                                                                                                                                                                                                                  |
| GATA binding protein 1                                                                                                                                                                                                                                                                                         |
| integrin alpha 4                                                                                                                                                                                                                                                                                               |
| integrin alpha 4                                                                                                                                                                                                                                                                                               |
| H2.0-like homeo box 1 (Drosophila)                                                                                                                                                                                                                                                                             |
| interleukin 1 receptor, type II                                                                                                                                                                                                                                                                                |
| ceroid lipofuscinosis, neuronal 3, juvenile (Batten, Spielmeyer-Vogt disease)                                                                                                                                                                                                                                  |
| homeo box C4                                                                                                                                                                                                                                                                                                   |
| early growth response 2                                                                                                                                                                                                                                                                                        |
| asialoglycoprotein receptor 2                                                                                                                                                                                                                                                                                  |
| plasminogen activator, urokinase receptor                                                                                                                                                                                                                                                                      |
| cyclin-dependent kinase 5, regulatory subunit (p35) 1                                                                                                                                                                                                                                                          |

|                                                                                                                                                     |
|-----------------------------------------------------------------------------------------------------------------------------------------------------|
| thyrotropin releasing hormone                                                                                                                       |
| tyrosinase                                                                                                                                          |
| wingless-related MMTV integration site 3A                                                                                                           |
| peroxisome proliferator activated receptor alpha                                                                                                    |
| sialic acid binding Ig-like lectin 1, sialoadhesin                                                                                                  |
| vacuolar protein sorting 54 (yeast)                                                                                                                 |
| cAMP responsive element binding protein 1                                                                                                           |
| cAMP responsive element binding protein 1                                                                                                           |
| cAMP responsive element binding protein 1                                                                                                           |
| cannabinoid receptor 2 (macrophage)                                                                                                                 |
| zona pellucida glycoprotein 3                                                                                                                       |
| von Hippel-Lindau syndrome homolog                                                                                                                  |
| Rho GDP dissociation inhibitor (GDI) gamma                                                                                                          |
| tripartite motif protein 21                                                                                                                         |
| mucosal vascular addressin cell adhesion molecule 1                                                                                                 |
| mucosal vascular addressin cell adhesion molecule 1                                                                                                 |
| tumor necrosis factor receptor superfamily, member 4                                                                                                |
| Eph receptor A8                                                                                                                                     |
| solute carrier family 30 (zinc transporter), member 3                                                                                               |
| submaxillary gland androgen regulated protein 2                                                                                                     |
| submaxillary gland androgen regulated protein 2                                                                                                     |
| suppressor of variegation 4-20 homolog 2 (Drosophila)                                                                                               |
| suppressor of variegation 3-9 homolog 2 (Drosophila)                                                                                                |
| granzyme D                                                                                                                                          |
| TAP binding protein                                                                                                                                 |
| cytochrome P450, family 2, subfamily b, polypeptide 19                                                                                              |
| zinc finger protein 385                                                                                                                             |
| histocompatibility 2, T region locus 18 /// similar to histocompatibility 2, T region locus 3 /// similar to histocompatibility 2, T region locus 3 |
| kallikrein 1-related petidase b26                                                                                                                   |
| pregnancy specific glycoprotein 16                                                                                                                  |
| T-cell receptor gamma, constant region                                                                                                              |
| phosphatidylinositol transfer protein, beta                                                                                                         |
| phosphatidylinositol transfer protein, beta                                                                                                         |
| endothelial PAS domain protein 1                                                                                                                    |
| myxovirus (influenza virus) resistance 2                                                                                                            |
| T-box brain gene 1                                                                                                                                  |
| cytochrome P450, family 2, subfamily b, polypeptide 10                                                                                              |
| CUE domain containing 1                                                                                                                             |
| aquaporin 4                                                                                                                                         |
| aquaporin 4                                                                                                                                         |
| interleukin 2                                                                                                                                       |
| serine (or cysteine) peptidase inhibitor, clade A, member 3C                                                                                        |
| serine (or cysteine) peptidase inhibitor, clade A, member 3C                                                                                        |
| butyrophilin, subfamily 1, member A1                                                                                                                |
| histone cell cycle regulation defective homolog A (S. cerevisiae)                                                                                   |
| amyloid beta (A4) precursor protein-binding, family B, member 1 interacting protein                                                                 |
| regulator of G-protein signaling 14                                                                                                                 |
| serum amyloid A 3                                                                                                                                   |
| GATA binding protein 4                                                                                                                              |
| heat shock protein 1-like                                                                                                                           |
| nuclear receptor subfamily 2, group F, member 1                                                                                                     |
| eyes absent 3 homolog (Drosophila)                                                                                                                  |
| 2'-5' oligoadenylate synthetase 1G                                                                                                                  |



|                                                                                                                                                                                                                                                                    |
|--------------------------------------------------------------------------------------------------------------------------------------------------------------------------------------------------------------------------------------------------------------------|
| chemokine (C-C motif) receptor 5                                                                                                                                                                                                                                   |
| chemokine (C-C motif) receptor 5                                                                                                                                                                                                                                   |
| endothelial-specific receptor tyrosine kinase                                                                                                                                                                                                                      |
| expressed sequence AI324046                                                                                                                                                                                                                                        |
| expressed sequence AI324046                                                                                                                                                                                                                                        |
| expressed sequence AI324046                                                                                                                                                                                                                                        |
| rabaptin, RAB GTPase binding effector protein 1                                                                                                                                                                                                                    |
| potassium voltage-gated channel, shaker-related subfamily, beta member 1                                                                                                                                                                                           |
| tachykinin 1                                                                                                                                                                                                                                                       |
| brain derived neurotrophic factor                                                                                                                                                                                                                                  |
| granzyme E                                                                                                                                                                                                                                                         |
| hydroxysteroid dehydrogenase-6, delta<5>-3-beta                                                                                                                                                                                                                    |
| histocompatibility 2, M region locus 3                                                                                                                                                                                                                             |
| histocompatibility 2, M region locus 3                                                                                                                                                                                                                             |
| talin 1                                                                                                                                                                                                                                                            |
| granzyme C                                                                                                                                                                                                                                                         |
| baculoviral IAP repeat-containing 2                                                                                                                                                                                                                                |
| testis expressed gene 9                                                                                                                                                                                                                                            |
| chemokine (C-C motif) ligand 2                                                                                                                                                                                                                                     |
| endothelin 1                                                                                                                                                                                                                                                       |
| endothelin 1                                                                                                                                                                                                                                                       |
| submaxillary gland androgen regulated protein 1 /// submaxillary gland androgen regulated protein 3                                                                                                                                                                |
| makorin, ring finger protein, 3                                                                                                                                                                                                                                    |
| adenosine deaminase, RNA-specific                                                                                                                                                                                                                                  |
| microtubule-associated protein tau                                                                                                                                                                                                                                 |
| microtubule-associated protein tau                                                                                                                                                                                                                                 |
| T-cell receptor gamma chain /// T cell receptor gamma chain /// similar to T-cell receptor gamma chain C region C7.5 /// similar to T-cell receptor gamma chain C region C7.5 /// region containing T-cell receptor gamma chain; T-cell receptor gamma, variable 4 |
| T-cell receptor gamma chain /// region containing T-cell receptor gamma chain; T-cell receptor gamma, variable 4                                                                                                                                                   |
| cDNA sequence BC089491                                                                                                                                                                                                                                             |
| t-complex-associated testis expressed 1                                                                                                                                                                                                                            |
| ---                                                                                                                                                                                                                                                                |
| cytochrome c oxidase, subunit VIIa 1                                                                                                                                                                                                                               |
| amyloid beta (A4) precursor protein-binding, family A, member 3                                                                                                                                                                                                    |
| transforming growth factor, beta 3                                                                                                                                                                                                                                 |
| cytoplasmic FMR1 interacting protein 1                                                                                                                                                                                                                             |
| multiple endocrine neoplasia 1                                                                                                                                                                                                                                     |
| baculoviral IAP repeat-containing 6                                                                                                                                                                                                                                |
| intelectin a                                                                                                                                                                                                                                                       |
| RNA binding motif protein 6                                                                                                                                                                                                                                        |
| phosphatidylinositol 3-kinase, regulatory subunit, polypeptide 2 (p85 beta)                                                                                                                                                                                        |
| GrpE-like 2, mitochondrial                                                                                                                                                                                                                                         |
| Rhesus blood group-associated A glycoprotein                                                                                                                                                                                                                       |
| plasma membrane associated protein, S3-12                                                                                                                                                                                                                          |
| tumor rejection antigen P1A                                                                                                                                                                                                                                        |
| COP9 (constitutive photomorphogenic) homolog, subunit 7b (Arabidopsis thaliana)                                                                                                                                                                                    |
| c-myc binding protein                                                                                                                                                                                                                                              |
| guanine nucleotide binding protein (G protein), gamma 12                                                                                                                                                                                                           |
| sterol-C5-desaturase (fungal ERG3, delta-5-desaturase) homolog (S. cerevisae)                                                                                                                                                                                      |
| sterol-C5-desaturase (fungal ERG3, delta-5-desaturase) homolog (S. cerevisae)                                                                                                                                                                                      |
| glycophorin A                                                                                                                                                                                                                                                      |
| SET domain, bifurcated 1                                                                                                                                                                                                                                           |
| v-abl Abelson murine leukemia oncogene 1                                                                                                                                                                                                                           |
| carbonic anhydrase 8                                                                                                                                                                                                                                               |

|                                                                                                                                                                                                                                                                                                                                                                                                                                                                                                                                                                                                                                                                                                                                       |
|---------------------------------------------------------------------------------------------------------------------------------------------------------------------------------------------------------------------------------------------------------------------------------------------------------------------------------------------------------------------------------------------------------------------------------------------------------------------------------------------------------------------------------------------------------------------------------------------------------------------------------------------------------------------------------------------------------------------------------------|
| epidermal growth factor                                                                                                                                                                                                                                                                                                                                                                                                                                                                                                                                                                                                                                                                                                               |
| ubiquitin specific peptidase 38                                                                                                                                                                                                                                                                                                                                                                                                                                                                                                                                                                                                                                                                                                       |
| ---                                                                                                                                                                                                                                                                                                                                                                                                                                                                                                                                                                                                                                                                                                                                   |
| CD79A antigen (immunoglobulin-associated alpha)                                                                                                                                                                                                                                                                                                                                                                                                                                                                                                                                                                                                                                                                                       |
| growth arrest and DNA-damage-inducible 45 beta                                                                                                                                                                                                                                                                                                                                                                                                                                                                                                                                                                                                                                                                                        |
| sulfiredoxin 1 homolog (S. cerevisiae)                                                                                                                                                                                                                                                                                                                                                                                                                                                                                                                                                                                                                                                                                                |
| cyclin L2                                                                                                                                                                                                                                                                                                                                                                                                                                                                                                                                                                                                                                                                                                                             |
| RIO kinase 1 (yeast)                                                                                                                                                                                                                                                                                                                                                                                                                                                                                                                                                                                                                                                                                                                  |
| RIKEN cDNA 2310009E04 gene                                                                                                                                                                                                                                                                                                                                                                                                                                                                                                                                                                                                                                                                                                            |
| RIKEN cDNA 4632413K17 gene                                                                                                                                                                                                                                                                                                                                                                                                                                                                                                                                                                                                                                                                                                            |
| matrilin 1, cartilage matrix protein 1                                                                                                                                                                                                                                                                                                                                                                                                                                                                                                                                                                                                                                                                                                |
| chloride channel 3                                                                                                                                                                                                                                                                                                                                                                                                                                                                                                                                                                                                                                                                                                                    |
| G protein-coupled receptor 56                                                                                                                                                                                                                                                                                                                                                                                                                                                                                                                                                                                                                                                                                                         |
| paired-like homeodomain transcription factor 2                                                                                                                                                                                                                                                                                                                                                                                                                                                                                                                                                                                                                                                                                        |
| GATA binding protein 2                                                                                                                                                                                                                                                                                                                                                                                                                                                                                                                                                                                                                                                                                                                |
| jumping translocation breakpoint                                                                                                                                                                                                                                                                                                                                                                                                                                                                                                                                                                                                                                                                                                      |
| proteosome (prosome, macropain) subunit, beta type 8 (large multifunctional peptidase 7)                                                                                                                                                                                                                                                                                                                                                                                                                                                                                                                                                                                                                                              |
| uracil DNA glycosylase                                                                                                                                                                                                                                                                                                                                                                                                                                                                                                                                                                                                                                                                                                                |
| keratin associated protein 8-1                                                                                                                                                                                                                                                                                                                                                                                                                                                                                                                                                                                                                                                                                                        |
| chemokine (C-X-C motif) receptor 4                                                                                                                                                                                                                                                                                                                                                                                                                                                                                                                                                                                                                                                                                                    |
| mesoderm posterior 1                                                                                                                                                                                                                                                                                                                                                                                                                                                                                                                                                                                                                                                                                                                  |
| nucleoplasmin 3 /// nucleoplasmin 3, pseudogene 1 /// similar to Nucleoplasmin-3                                                                                                                                                                                                                                                                                                                                                                                                                                                                                                                                                                                                                                                      |
| dehydrogenase/reductase (SDR family) member 3                                                                                                                                                                                                                                                                                                                                                                                                                                                                                                                                                                                                                                                                                         |
| adrenomedullin                                                                                                                                                                                                                                                                                                                                                                                                                                                                                                                                                                                                                                                                                                                        |
| complement component 4 binding protein                                                                                                                                                                                                                                                                                                                                                                                                                                                                                                                                                                                                                                                                                                |
| forkhead box C2                                                                                                                                                                                                                                                                                                                                                                                                                                                                                                                                                                                                                                                                                                                       |
| bone gamma-carboxyglutamate protein, related sequence 1                                                                                                                                                                                                                                                                                                                                                                                                                                                                                                                                                                                                                                                                               |
| interleukin 18                                                                                                                                                                                                                                                                                                                                                                                                                                                                                                                                                                                                                                                                                                                        |
| ligase III, DNA, ATP-dependent                                                                                                                                                                                                                                                                                                                                                                                                                                                                                                                                                                                                                                                                                                        |
| CEA-related cell adhesion molecule 1 /// CEA-related cell adhesion molecule 2                                                                                                                                                                                                                                                                                                                                                                                                                                                                                                                                                                                                                                                         |
| CEA-related cell adhesion molecule 1                                                                                                                                                                                                                                                                                                                                                                                                                                                                                                                                                                                                                                                                                                  |
| CEA-related cell adhesion molecule 1                                                                                                                                                                                                                                                                                                                                                                                                                                                                                                                                                                                                                                                                                                  |
| prune homolog (Drosophila)                                                                                                                                                                                                                                                                                                                                                                                                                                                                                                                                                                                                                                                                                                            |
| sodium channel, voltage-gated, type I, beta                                                                                                                                                                                                                                                                                                                                                                                                                                                                                                                                                                                                                                                                                           |
| lymphocyte protein tyrosine kinase                                                                                                                                                                                                                                                                                                                                                                                                                                                                                                                                                                                                                                                                                                    |
| exostoses (multiple) 1                                                                                                                                                                                                                                                                                                                                                                                                                                                                                                                                                                                                                                                                                                                |
| ubiquitin-activating enzyme E1-domain containing 1                                                                                                                                                                                                                                                                                                                                                                                                                                                                                                                                                                                                                                                                                    |
| ubiquitin-activating enzyme E1-domain containing 1                                                                                                                                                                                                                                                                                                                                                                                                                                                                                                                                                                                                                                                                                    |
| defensin related sequence cryptdin peptide (paneth cells)                                                                                                                                                                                                                                                                                                                                                                                                                                                                                                                                                                                                                                                                             |
| annexin A11                                                                                                                                                                                                                                                                                                                                                                                                                                                                                                                                                                                                                                                                                                                           |
| serine (or cysteine) peptidase inhibitor, clade A, member 3M                                                                                                                                                                                                                                                                                                                                                                                                                                                                                                                                                                                                                                                                          |
| U2 small nuclear ribonucleoprotein auxiliary factor (U2AF) 1, related sequence 1                                                                                                                                                                                                                                                                                                                                                                                                                                                                                                                                                                                                                                                      |
| Xlr-related, meiosis regulated /// Xmr protein /// similar to Xlr-related, meiosis regulated /// similar to XMR /// similar to Xlr-related, meiosis regulated |
| nucleosome assembly protein 1-like 2                                                                                                                                                                                                                                                                                                                                                                                                                                                                                                                                                                                                                                                                                                  |
| cytochrome P450, family 2, subfamily b, polypeptide 13                                                                                                                                                                                                                                                                                                                                                                                                                                                                                                                                                                                                                                                                                |
| RAN, member RAS oncogene family /// RAS-like, family 2, locus 9 /// similar to RAN, member RAS oncogene family /// similar to RAN, member RAS oncogene family                                                                                                                                                                                                                                                                                                                                                                                                                                                                                                                                                                         |
| granzyme F                                                                                                                                                                                                                                                                                                                                                                                                                                                                                                                                                                                                                                                                                                                            |
| Immunoglobulin heavy chain (gamma polypeptide)                                                                                                                                                                                                                                                                                                                                                                                                                                                                                                                                                                                                                                                                                        |
| Immunoglobulin heavy chain (gamma polypeptide)                                                                                                                                                                                                                                                                                                                                                                                                                                                                                                                                                                                                                                                                                        |
| Immunoglobulin heavy chain (gamma polypeptide)                                                                                                                                                                                                                                                                                                                                                                                                                                                                                                                                                                                                                                                                                        |
| aldo-keto reductase family 1, member B7                                                                                                                                                                                                                                                                                                                                                                                                                                                                                                                                                                                                                                                                                               |
| NIMA (never in mitosis gene a)-related expressed kinase 7                                                                                                                                                                                                                                                                                                                                                                                                                                                                                                                                                                                                                                                                             |

|                                                                                                                                                                                |
|--------------------------------------------------------------------------------------------------------------------------------------------------------------------------------|
| mitogen activated protein kinase kinase 6                                                                                                                                      |
| mitogen activated protein kinase kinase 6                                                                                                                                      |
| CD86 antigen                                                                                                                                                                   |
| CD86 antigen                                                                                                                                                                   |
| MAP kinase-activated protein kinase 5 /// a disintegrin and metallopeptidase domain 1a                                                                                         |
| chromobox homolog 2 (Drosophila Pc class)                                                                                                                                      |
| similar to crooked neck protein /// similar to crooked neck protein /// similar to crooked neck protein /// hypothetical protein LOC670749 /// similar to crooked neck protein |
| adaptor protein complex AP-2, alpha 2 subunit                                                                                                                                  |
| putative phosphatase                                                                                                                                                           |
| selectin, lymphocyte                                                                                                                                                           |
| phospholipid scramblase 1                                                                                                                                                      |
| protein tyrosine phosphatase, non-receptor type 12                                                                                                                             |
| similar to ubiquitin A-52 residue ribosomal protein fusion product 1                                                                                                           |
| immunoglobulin heavy chain 1a (serum IgG2a)                                                                                                                                    |
| immunoglobulin heavy chain 1a (serum IgG2a)                                                                                                                                    |
| PDZ and LIM domain 7                                                                                                                                                           |
| testis-specific serine kinase 2                                                                                                                                                |
| cytochrome P450, family 2, subfamily a, polypeptide 4 /// cytochrome P450, family 2, subfamily a, polypeptide 5 /// hypothetical gene supported by X89864; NM_007812           |
| RIKEN cDNA 2610524H06 gene                                                                                                                                                     |
| potassium inwardly-rectifying channel, subfamily J, member 8                                                                                                                   |
| tyrosine kinase, non-receptor, 2                                                                                                                                               |
| protein tyrosine phosphatase, non-receptor type 6                                                                                                                              |
| cadherin 2                                                                                                                                                                     |
| chondroitin sulfate proteoglycan 6                                                                                                                                             |
| ATPase, Cu++ transporting, alpha polypeptide                                                                                                                                   |
| SRY-box containing gene 10                                                                                                                                                     |
| A kinase (PRKA) anchor protein 4                                                                                                                                               |
| protein kinase inhibitor beta, cAMP dependent, testis specific                                                                                                                 |
| receptor accessory protein 1                                                                                                                                                   |
| serine (or cysteine) peptidase inhibitor, clade A, member 3G                                                                                                                   |
| solute carrier family 22 (organic cation transporter), member 18                                                                                                               |
| ---                                                                                                                                                                            |
| zinc finger with KRAB and SCAN domains 1                                                                                                                                       |
| homeo box A7                                                                                                                                                                   |
| MAD homolog 5 (Drosophila)                                                                                                                                                     |
| ---                                                                                                                                                                            |
| TEA domain family member 4                                                                                                                                                     |
| TEA domain family member 4                                                                                                                                                     |
| ephrin A2                                                                                                                                                                      |
| G protein-coupled receptor 178                                                                                                                                                 |
| Eph receptor B6                                                                                                                                                                |
| zinc finger protein 51                                                                                                                                                         |
| transporter 2, ATP-binding cassette, sub-family B (MDR/TAP)                                                                                                                    |
| protein tyrosine phosphatase, non-receptor type 11                                                                                                                             |
| ribosomal protein S6 kinase polypeptide 1                                                                                                                                      |
| granzyme G                                                                                                                                                                     |
| granzyme B                                                                                                                                                                     |
| RAD52 homolog (S. cerevisiae)                                                                                                                                                  |
| Fc receptor, IgG, high affinity I                                                                                                                                              |
| RIKEN cDNA E130103I17 gene                                                                                                                                                     |
| RIKEN cDNA E130103I17 gene                                                                                                                                                     |
| zinc finger protein 46                                                                                                                                                         |
| RNA polymerase II associated protein 1                                                                                                                                         |

|                                                                                                                                                                                                                            |
|----------------------------------------------------------------------------------------------------------------------------------------------------------------------------------------------------------------------------|
| inositol polyphosphate-5-phosphatase D                                                                                                                                                                                     |
| synaptobrevin like 1                                                                                                                                                                                                       |
| glypican 4                                                                                                                                                                                                                 |
| tumor necrosis factor receptor superfamily, member 11b (osteoprotegerin)                                                                                                                                                   |
| LIM-domain containing, protein kinase                                                                                                                                                                                      |
| LIM-domain containing, protein kinase                                                                                                                                                                                      |
| syntrophin, acidic 1                                                                                                                                                                                                       |
| Werner syndrome homolog (human)                                                                                                                                                                                            |
| potassium voltage-gated channel, shaker-related subfamily, beta member 2                                                                                                                                                   |
| POU domain, class 2, transcription factor 1                                                                                                                                                                                |
| POU domain, class 2, transcription factor 1                                                                                                                                                                                |
| Nipped-B homolog (Drosophila)                                                                                                                                                                                              |
| docking protein 1                                                                                                                                                                                                          |
| hepatocyte growth factor                                                                                                                                                                                                   |
| ST6 (alpha-N-acetyl-neuraminy1-2,3-beta-galactosyl-1,3)-N-acetylglactosaminide alpha-2,6-sialyltransferase 3                                                                                                               |
| sine oculis-related homeobox 3 homolog (Drosophila) /// RIKEN cDNA E130112M24 gene                                                                                                                                         |
| sine oculis-related homeobox 3 homolog (Drosophila)                                                                                                                                                                        |
| LIM homeobox protein 3                                                                                                                                                                                                     |
| histocompatibility 2, class II antigen E alpha                                                                                                                                                                             |
| caspase 4, apoptosis-related cysteine peptidase                                                                                                                                                                            |
| T-cell specific GTPase                                                                                                                                                                                                     |
| pleckstrin homology-like domain, family B, member 2                                                                                                                                                                        |
| erythrocyte protein band 4.2                                                                                                                                                                                               |
| ATP-binding cassette, sub-family B (MDR/TAP), member 1A                                                                                                                                                                    |
| breast cancer 2                                                                                                                                                                                                            |
| tankyrase, TRF1-interacting ankyrin-related ADP-ribose polymerase 2                                                                                                                                                        |
| B-cell leukemia/lymphoma 2 related protein A1a /// B-cell leukemia/lymphoma 2 related protein A1b /// B-cell leukemia/lymphoma 2 related protein A1d                                                                       |
| B-cell leukemia/lymphoma 2 related protein A1a /// B-cell leukemia/lymphoma 2 related protein A1b /// B-cell leukemia/lymphoma 2 related protein A1c /// B-cell leukemia/lymphoma 2 related protein A1d                    |
| coagulation factor II (thrombin) receptor-like 1                                                                                                                                                                           |
| tenascin XB                                                                                                                                                                                                                |
| class II transactivator                                                                                                                                                                                                    |
| mucin 1, transmembrane                                                                                                                                                                                                     |
| v-maf musculoaponeurotic fibrosarcoma oncogene family, protein K (avian)                                                                                                                                                   |
| RIKEN cDNA 9130422G05 gene                                                                                                                                                                                                 |
| Fas (TNF receptor superfamily member)                                                                                                                                                                                      |
| phosphatidylinositol transfer protein, cytoplasmic 1                                                                                                                                                                       |
| prepronociceptin                                                                                                                                                                                                           |
| deltex 1 homolog (Drosophila)                                                                                                                                                                                              |
| dual specificity phosphatase 9                                                                                                                                                                                             |
| glial cell line derived neurotrophic factor family receptor alpha 3                                                                                                                                                        |
| Huntington disease gene homolog                                                                                                                                                                                            |
| Huntington disease gene homolog                                                                                                                                                                                            |
| FMS-like tyrosine kinase 3 ligand                                                                                                                                                                                          |
| silver                                                                                                                                                                                                                     |
| whey acidic protein                                                                                                                                                                                                        |
| nuclear receptor subfamily 5, group A, member 2                                                                                                                                                                            |
| plexin A3                                                                                                                                                                                                                  |
| cell division cycle 25 homolog C (S. cerevisiae)                                                                                                                                                                           |
| cell division cycle 25 homolog C (S. cerevisiae)                                                                                                                                                                           |
| similar to Beta-1,4-galactosyltransferase 6 (Beta-1,4-GalTase 6) (Beta4Gal-T6) (b4Gal-T6) (UDP-galactose:beta-N-acetylglucosamine beta-1,4-galactosyltransferase 6) (UDP-Gal:beta-GlcNAc beta-1,4-galactosyltransferase 6) |
| similar to transcription elongation factor B polypeptide 3 binding protein 1 isoform 1 /// similar to transcription elongation factor B polypeptide 3 binding protein 1 isoform 1                                          |
| leukocyte cell-derived chemotaxin 2                                                                                                                                                                                        |
| CD22 antigen                                                                                                                                                                                                               |

|                                                                                                                                                                                                                                                           |
|-----------------------------------------------------------------------------------------------------------------------------------------------------------------------------------------------------------------------------------------------------------|
| lymphotoxin B                                                                                                                                                                                                                                             |
| UDP-glucose ceramide glucosyltransferase-like 1                                                                                                                                                                                                           |
| spectrin domain with coiled-coils 1                                                                                                                                                                                                                       |
| autophagy-related 7 (yeast)                                                                                                                                                                                                                               |
| Ras-GTPase-activating protein SH3-domain binding protein                                                                                                                                                                                                  |
| ---                                                                                                                                                                                                                                                       |
| solute carrier family 22 (organic cation transporter), member 2                                                                                                                                                                                           |
| similar to Glycosyl-phosphatidylinositol-anchored molecule-like protein precursor                                                                                                                                                                         |
| hematopoietic cell transcript 1                                                                                                                                                                                                                           |
| hematopoietic cell transcript 1                                                                                                                                                                                                                           |
| CASP2 and RIPK1 domain containing adaptor with death domain                                                                                                                                                                                               |
| CASP2 and RIPK1 domain containing adaptor with death domain                                                                                                                                                                                               |
| mesothelin                                                                                                                                                                                                                                                |
| SRY-box containing gene 5                                                                                                                                                                                                                                 |
| nuclear factor, interleukin 3, regulated                                                                                                                                                                                                                  |
| homeo box, msh-like 2                                                                                                                                                                                                                                     |
| lymphocyte cytosolic protein 2                                                                                                                                                                                                                            |
| early B-cell factor 2                                                                                                                                                                                                                                     |
| transducin-like enhancer of split 4, homolog of Drosophila E(spl)                                                                                                                                                                                         |
| recombination activating gene 1 activating protein 1                                                                                                                                                                                                      |
| histidine-rich glycoprotein                                                                                                                                                                                                                               |
| septin 1                                                                                                                                                                                                                                                  |
| E2F transcription factor 1                                                                                                                                                                                                                                |
| zinc finger protein 639                                                                                                                                                                                                                                   |
| expressed sequence AI481105                                                                                                                                                                                                                               |
| CCR4-NOT transcription complex, subunit 6-like                                                                                                                                                                                                            |
| ganglioside-induced differentiation-associated-protein 1                                                                                                                                                                                                  |
| gamma-glutamyltransferase-like activity 1                                                                                                                                                                                                                 |
| RIKEN cDNA 0610025P10 gene                                                                                                                                                                                                                                |
| proteasome (prosome, macropain) 26S subunit, ATPase 3, interacting protein                                                                                                                                                                                |
| CD3 antigen, epsilon polypeptide                                                                                                                                                                                                                          |
| disabled homolog 1 (Drosophila)                                                                                                                                                                                                                           |
| murinoglobulin 2                                                                                                                                                                                                                                          |
| macrophage receptor with collagenous structure                                                                                                                                                                                                            |
| CD8 antigen, alpha chain /// similar to T-cell surface glycoprotein CD8 alpha chain precursor (T-cell surface glycoprotein Lyt-2) /// similar to T-cell surface glycoprotein CD8 alpha chain precursor (T-cell surface glycoprotein Lyt-2) (CD8a antigen) |
| breast cancer 1                                                                                                                                                                                                                                           |
| nonagouti                                                                                                                                                                                                                                                 |
| RIKEN cDNA A430104N18 gene                                                                                                                                                                                                                                |
| Src homology 2 domain containing F                                                                                                                                                                                                                        |
| N-myristoyltransferase 1                                                                                                                                                                                                                                  |
| GA repeat binding protein, alpha                                                                                                                                                                                                                          |
| RIKEN cDNA B230308N11 gene                                                                                                                                                                                                                                |
| MAD homolog 1 (Drosophila)                                                                                                                                                                                                                                |
| MAD homolog 1 (Drosophila)                                                                                                                                                                                                                                |
| serine/arginine-rich protein specific kinase 1                                                                                                                                                                                                            |
| myogenic differentiation 1                                                                                                                                                                                                                                |
| RIKEN cDNA 2010109K11 gene                                                                                                                                                                                                                                |
| inositol polyphosphate phosphatase-like 1                                                                                                                                                                                                                 |
| metallothionein 4                                                                                                                                                                                                                                         |
| procollagen, type III, alpha 1                                                                                                                                                                                                                            |
| H2-K region expressed gene 6                                                                                                                                                                                                                              |
| H2-K region expressed gene 6                                                                                                                                                                                                                              |
| glycoprotein galactosyltransferase alpha 1, 3                                                                                                                                                                                                             |

|                                                                                                                                                                                                                                                                                        |
|----------------------------------------------------------------------------------------------------------------------------------------------------------------------------------------------------------------------------------------------------------------------------------------|
| signal transducer and activator of transcription 4                                                                                                                                                                                                                                     |
| granzyme A                                                                                                                                                                                                                                                                             |
| elongation factor RNA polymerase II                                                                                                                                                                                                                                                    |
| cytochrome P450, family 1, subfamily a, polypeptide 2                                                                                                                                                                                                                                  |
| vascular endothelial growth factor B                                                                                                                                                                                                                                                   |
| UDP-Gal:betaGlcNAc beta 1,4- galactosyltransferase, polypeptide 1                                                                                                                                                                                                                      |
| CD44 antigen                                                                                                                                                                                                                                                                           |
| CD44 antigen                                                                                                                                                                                                                                                                           |
| CD44 antigen                                                                                                                                                                                                                                                                           |
| activating transcription factor 5                                                                                                                                                                                                                                                      |
| ephrin A1                                                                                                                                                                                                                                                                              |
| histone cell cycle regulation defective homolog A (S. cerevisiae)                                                                                                                                                                                                                      |
| RIKEN cDNA 2610005L07 gene                                                                                                                                                                                                                                                             |
| transcriptional regulator, SIN3A (yeast)                                                                                                                                                                                                                                               |
| chemokine (C-C motif) ligand 21b /// chemokine (C-C motif) ligand 21a /// chemokine (C-C motif) ligand 21c (leucine)                                                                                                                                                                   |
| upstream transcription factor 2                                                                                                                                                                                                                                                        |
| B-cell leukemia/lymphoma 6                                                                                                                                                                                                                                                             |
| CD68 antigen                                                                                                                                                                                                                                                                           |
| similar to transmembrane 7 superfamily member 1                                                                                                                                                                                                                                        |
| vesicle docking protein                                                                                                                                                                                                                                                                |
| mitogen activated protein kinase kinase kinase 1 /// similar to Mitogen-activated protein kinase kinase kinase 1 (MAPK/ERK kinase kinase 1) (MEK kinase 1) (MEKK 1) /// similar to Mitogen-activated protein kinase kinase kinase 1 (MAPK/ERK kinase kinase 1) (MEK kinase 1) (MEKK 1) |
| mitogen activated protein kinase kinase kinase 1 /// similar to Mitogen-activated protein kinase kinase kinase 1 (MAPK/ERK kinase kinase 1) (MEK kinase 1) (MEKK 1) /// similar to Mitogen-activated protein kinase kinase kinase 1 (MAPK/ERK kinase kinase 1) (MEK kinase 1) (MEKK 1) |
| mitogen activated protein kinase kinase kinase 1 /// similar to Mitogen-activated protein kinase kinase kinase 1 (MAPK/ERK kinase kinase 1) (MEK kinase 1) (MEKK 1) /// similar to Mitogen-activated protein kinase kinase kinase 1 (MAPK/ERK kinase kinase 1) (MEK kinase 1) (MEKK 1) |
| lecithin cholesterol acyltransferase                                                                                                                                                                                                                                                   |
| a disintegrin and metallopeptidase domain 8                                                                                                                                                                                                                                            |
| Moloney leukemia virus 10                                                                                                                                                                                                                                                              |
| crystallin, gamma D /// crystallin, gamma F                                                                                                                                                                                                                                            |
| RIKEN cDNA 1810030O07 gene                                                                                                                                                                                                                                                             |
| IL2-inducible T-cell kinase                                                                                                                                                                                                                                                            |
| programmed cell death 4 /// similar to programmed cell death 4                                                                                                                                                                                                                         |
| dynamin 1                                                                                                                                                                                                                                                                              |
| dynamin 1                                                                                                                                                                                                                                                                              |
| protein-tyrosine sulfotransferase 1                                                                                                                                                                                                                                                    |
| complement component 4B (Chido blood group) /// complement component 4A (Rodgers blood group) /// similar to sex-limited protein /// similar to Complement C4 precursor                                                                                                                |
| cyclin E1                                                                                                                                                                                                                                                                              |
| transporter 1, ATP-binding cassette, sub-family B (MDR/TAP)                                                                                                                                                                                                                            |
| X-ray repair complementing defective repair in Chinese hamster cells 6                                                                                                                                                                                                                 |
| cardiotrophin 1                                                                                                                                                                                                                                                                        |
| guanylate cyclase activator 1a (retina)                                                                                                                                                                                                                                                |
| integrin alpha 5 (fibronectin receptor alpha)                                                                                                                                                                                                                                          |
| CD83 antigen                                                                                                                                                                                                                                                                           |
| ephrin A4                                                                                                                                                                                                                                                                              |
| mature T-cell proliferation 1                                                                                                                                                                                                                                                          |
| mature T-cell proliferation 1                                                                                                                                                                                                                                                          |
| mature T-cell proliferation 1                                                                                                                                                                                                                                                          |
| carbonic anhydrase 4                                                                                                                                                                                                                                                                   |
| peroxisomal membrane protein 3                                                                                                                                                                                                                                                         |
| v-myc myelocytomatosis viral related oncogene, neuroblastoma derived (avian)                                                                                                                                                                                                           |
| ---                                                                                                                                                                                                                                                                                    |
| transcription factor 21                                                                                                                                                                                                                                                                |
| extracellular proteinase inhibitor                                                                                                                                                                                                                                                     |

|                                                                                                                                                                                                                                                                              |
|------------------------------------------------------------------------------------------------------------------------------------------------------------------------------------------------------------------------------------------------------------------------------|
| nuclear receptor subfamily 2, group F, member 2                                                                                                                                                                                                                              |
| myogenin                                                                                                                                                                                                                                                                     |
| polymerase (RNA) II (DNA directed) polypeptide A                                                                                                                                                                                                                             |
| polymerase (RNA) II (DNA directed) polypeptide A                                                                                                                                                                                                                             |
| UTP18, small subunit (SSU) processome component, homolog (yeast)                                                                                                                                                                                                             |
| polymerase (DNA directed), delta 1, catalytic subunit                                                                                                                                                                                                                        |
| t-complex protein 10a                                                                                                                                                                                                                                                        |
| FXVD domain-containing ion transport regulator 3                                                                                                                                                                                                                             |
| leucine-rich repeat LGI family, member 4                                                                                                                                                                                                                                     |
| glutamic acid decarboxylase 1                                                                                                                                                                                                                                                |
| RAB33B, member of RAS oncogene family                                                                                                                                                                                                                                        |
| zinc finger protein 62                                                                                                                                                                                                                                                       |
| checkpoint kinase 1 homolog (S. pombe)                                                                                                                                                                                                                                       |
| solute carrier family 20, member 1                                                                                                                                                                                                                                           |
| thymidylate kinase family LPS-inducible member                                                                                                                                                                                                                               |
| v-rat simian leukemia viral oncogene homolog A (ras related)                                                                                                                                                                                                                 |
| aldo-keto reductase family 1, member E1                                                                                                                                                                                                                                      |
| lin-9 homolog (C. elegans)                                                                                                                                                                                                                                                   |
| signal-regulatory protein alpha                                                                                                                                                                                                                                              |
| topoisomerase (DNA) II beta binding protein                                                                                                                                                                                                                                  |
| hydroxysteroid dehydrogenase-1, delta<5>-3-beta                                                                                                                                                                                                                              |
| TAF9 RNA polymerase II, TATA box binding protein (TBP)-associated factor /// similar to TAF9 RNA polymerase II, TATA box binding protein (TBP)-associated factor isoform 1 /// similar to TAF9 RNA polymerase II, TATA box binding protein (TBP)-associated factor isoform 1 |
| TAF9 RNA polymerase II, TATA box binding protein (TBP)-associated factor /// similar to TAF9 RNA polymerase II, TATA box binding protein (TBP)-associated factor isoform 1 /// similar to TAF9 RNA polymerase II, TATA box binding protein (TBP)-associated factor isoform 1 |
| POU domain, class 5, transcription factor 1                                                                                                                                                                                                                                  |
| chromatin modifying protein 5                                                                                                                                                                                                                                                |
| transmembrane protein 150                                                                                                                                                                                                                                                    |
| AT rich interactive domain 2 (Arid-rfx like)                                                                                                                                                                                                                                 |
| SAM domain and HD domain, 1                                                                                                                                                                                                                                                  |
| bromodomain adjacent to zinc finger domain, 1B                                                                                                                                                                                                                               |
| RIKEN cDNA E230022H04 gene                                                                                                                                                                                                                                                   |
| lipase, hormone sensitive                                                                                                                                                                                                                                                    |
| cysteine and glycine-rich protein 3                                                                                                                                                                                                                                          |
| heme binding protein 1                                                                                                                                                                                                                                                       |
| homeo box A5                                                                                                                                                                                                                                                                 |
| sulfotransferase family 1A, phenol-preferring, member 1                                                                                                                                                                                                                      |
| cell adhesion molecule with homology to L1CAM                                                                                                                                                                                                                                |
| CD48 antigen                                                                                                                                                                                                                                                                 |
| RIKEN cDNA 2410003P15 gene                                                                                                                                                                                                                                                   |
| avian reticuloendotheliosis viral (v-rel) oncogene related B                                                                                                                                                                                                                 |
| tripartite motif protein 37                                                                                                                                                                                                                                                  |
| small EDRK-rich factor 1                                                                                                                                                                                                                                                     |
| growth factor receptor bound protein 7                                                                                                                                                                                                                                       |
| zinc finger protein 259                                                                                                                                                                                                                                                      |
| RIKEN cDNA 0610038F07 gene                                                                                                                                                                                                                                                   |
| brain-specific angiogenesis inhibitor 1-associated protein 2                                                                                                                                                                                                                 |
| CXXC finger 1 (PHD domain)                                                                                                                                                                                                                                                   |
| WW domain containing transcription regulator 1                                                                                                                                                                                                                               |
| TAR (HIV) RNA binding protein 2                                                                                                                                                                                                                                              |
| expressed sequence C78948                                                                                                                                                                                                                                                    |
| RIKEN cDNA 6330512M04 gene                                                                                                                                                                                                                                                   |
| chemokine (C motif) ligand 1                                                                                                                                                                                                                                                 |
| RIKEN cDNA 6330500D04 gene                                                                                                                                                                                                                                                   |

|                                                                                               |
|-----------------------------------------------------------------------------------------------|
| Ttk protein kinase                                                                            |
| guanylate nucleotide binding protein 4                                                        |
| E2F transcription factor 8                                                                    |
| E2F transcription factor 8                                                                    |
| T-cell, immune regulator 1, ATPase, H+ transporting, lysosomal V0 protein A3                  |
| component of oligomeric golgi complex 5                                                       |
| polymerase (DNA directed), alpha 1                                                            |
| potassium voltage gated channel, Shaw-related subfamily, member 1                             |
| latent transforming growth factor beta binding protein 1                                      |
| colony stimulating factor 2 receptor, beta 2, low-affinity (granulocyte-macrophage)           |
| WD repeat and FYVE domain containing 2                                                        |
| cell division cycle associated 7 like                                                         |
| cadherin 15 /// similar to Muscle-cadherin precursor (M-cadherin) (Cadherin-15) (Cadherin-14) |
| heat shock protein 2                                                                          |
| heat shock protein 2                                                                          |
| inhibitor of kappaB kinase gamma                                                              |
| CASP8 and FADD-like apoptosis regulator                                                       |
| solute carrier family 10 (sodium/bile acid cotransporter family), member 3                    |
| acid phosphatase, prostate                                                                    |
| necdin-like 2                                                                                 |
| serum amyloid A-like 1                                                                        |
| epidermal growth factor receptor pathway substrate 8                                          |
| protein kinase C, epsilon                                                                     |
| RAB33A, member of RAS oncogene family                                                         |
| deoxyribonuclease 1-like 1                                                                    |
| mannose receptor, C type 1                                                                    |
| UDP glucuronosyltransferase 2 family, polypeptide B34                                         |
| myotubularin related protein 7                                                                |
| nuclear receptor coactivator 1                                                                |
| ras homolog gene family, member H                                                             |
| BPY2 interacting protein 1                                                                    |
| homeodomain interacting protein kinase 3                                                      |
| neurofilament, heavy polypeptide                                                              |
| neuropeptide Y                                                                                |
| ring finger protein 1                                                                         |
| Max dimerization protein 3                                                                    |
| wingless-related MMTV integration site 4                                                      |
| caudal type homeo box 2                                                                       |
| eosinophil-associated, ribonuclease A family, member 2                                        |
| adenylate cyclase 2                                                                           |
| adaptor protein complex AP-1, gamma 1 subunit                                                 |
| epithelial membrane protein 2                                                                 |
| C-type lectin domain family 11, member a                                                      |
| cystatin 8 (cystatin-related epididymal spermatogenic)                                        |
| membrane protein, palmitoylated 3 (MAGUK p55 subfamily member 3)                              |
| FK506 binding protein 1b                                                                      |
| chordin                                                                                       |
| deafness, autosomal dominant 5 homolog (human)                                                |
| cytidine and dCMP deaminase domain containing 1                                               |
| G protein-coupled receptor 37                                                                 |
| lin-7 homolog B (C. elegans)                                                                  |
| TRAF type zinc finger domain containing 1                                                     |
| Tnf receptor-associated factor 5 /// similar to TNF receptor-associated factor 5              |



|                                                                                                                                          |
|------------------------------------------------------------------------------------------------------------------------------------------|
| membrane-spanning 4-domains, subfamily A, member 4D                                                                                      |
| transmembrane protein 56                                                                                                                 |
| lymphocyte antigen 75                                                                                                                    |
| growth factor independent 1                                                                                                              |
| RIKEN cDNA 1110060D06 gene /// dedicator of cytokinesis 5                                                                                |
| G1 to S phase transition 2                                                                                                               |
| homeodomain interacting protein kinase 1                                                                                                 |
| enhancer of polycomb homolog 1 (Drosophila)                                                                                              |
| myotubularin related protein 1                                                                                                           |
| erythrocyte protein band 4.1-like 1                                                                                                      |
| leukotriene B4 receptor 1                                                                                                                |
| Adult male olfactory brain cDNA, RIKEN full-length enriched library, clone:6430562O12 product:hypothetical protein, full insert sequence |
| Adult male olfactory brain cDNA, RIKEN full-length enriched library, clone:6430562O12 product:hypothetical protein, full insert sequence |
| zinc finger protein 125                                                                                                                  |
| G two S phase expressed protein 1                                                                                                        |
| low density lipoprotein receptor-related protein 6                                                                                       |
| calpain 3                                                                                                                                |
| ATP-binding cassette, sub-family C (CFTR/MRP), member 8                                                                                  |
| ATP-binding cassette, sub-family C (CFTR/MRP), member 8                                                                                  |
| ATPase, H+ transporting, lysosomal V0 subunit A1                                                                                         |
| like-glycosyltransferase                                                                                                                 |
| mediator of RNA polymerase II transcription, subunit 12 homolog (yeast)                                                                  |
| peptidyl arginine deiminase, type IV                                                                                                     |
| SH2 domain protein 1A                                                                                                                    |
| CD2-associated protein                                                                                                                   |
| RAS, guanyl releasing protein 2                                                                                                          |
| E74-like factor 5                                                                                                                        |
| cytochrome P450, family 8, subfamily b, polypeptide 1                                                                                    |
| methyl-CpG binding domain protein 4                                                                                                      |
| signal transducing adaptor molecule (SH3 domain and ITAM motif) 2                                                                        |
| nuclear receptor interacting protein 1                                                                                                   |
| corin                                                                                                                                    |
| melanoma antigen, family A, 2                                                                                                            |
| stanniocalcin 1                                                                                                                          |
| golgi SNAP receptor complex member 1                                                                                                     |
| regulator of G-protein signaling 5                                                                                                       |
| RIKEN cDNA 9130229H14 gene                                                                                                               |
| cystatin 9                                                                                                                               |
| 6-phosphofructo-2-kinase/fructose-2,6-biphosphatase 1                                                                                    |
| SPEG complex locus                                                                                                                       |
| phospholipase D family, member 4                                                                                                         |
| ATP-binding cassette, sub-family B (MDR/TAP), member 7                                                                                   |
| SRY-box containing gene 3                                                                                                                |
| SRY-box containing gene 3                                                                                                                |
| Chromodomain helicase DNA binding protein 7                                                                                              |
| integrin beta 4                                                                                                                          |
| serine (or cysteine) peptidase inhibitor, clade B, member 6c                                                                             |
| expressed sequence C79407                                                                                                                |
| FK506 binding protein 12-rapamycin associated protein 1                                                                                  |
| jumonji, AT rich interactive domain 1B (Rbp2 like)                                                                                       |
| oxysterol binding protein-like 5                                                                                                         |
| RIKEN cDNA 2610101J03 gene                                                                                                               |
| RIKEN cDNA 2610101J03 gene                                                                                                               |

|                                                                                                                                            |
|--------------------------------------------------------------------------------------------------------------------------------------------|
| poly (ADP-ribose) polymerase family, member 8                                                                                              |
| trinucleotide repeat containing 6a                                                                                                         |
| calmodulin regulated spectrin-associated protein 1                                                                                         |
| coagulation factor C homolog (Limulus polyphemus)                                                                                          |
| GA repeat binding protein, beta 1                                                                                                          |
| proteosome (prosome, macropain) 26S subunit, non-ATPase, 10                                                                                |
| MOB1, Mps One Binder kinase activator-like 1A (yeast)                                                                                      |
| ribose 5-phosphate isomerase A                                                                                                             |
| leucine rich repeat containing 35                                                                                                          |
| paired related homeobox 2                                                                                                                  |
| TRAF family member-associated Nf-kappa B activator                                                                                         |
| spermatid perinuclear RNA binding protein                                                                                                  |
| spermatid perinuclear RNA binding protein                                                                                                  |
| RIKEN cDNA C030006K11 gene                                                                                                                 |
| G protein-coupled receptor 125                                                                                                             |
| glucose-6-phosphatase, catalytic                                                                                                           |
| calcitonin gene-related peptide-receptor component protein                                                                                 |
| lectin, galactose binding, soluble 9                                                                                                       |
| bisphosphate 3'-nucleotidase 1                                                                                                             |
| poly (ADP-ribose) polymerase family, member 6                                                                                              |
| Rh blood group, D antigen                                                                                                                  |
| cytidine 5'-triphosphate synthase                                                                                                          |
| embryonic ectoderm development                                                                                                             |
| RIKEN cDNA 5430432M24 gene                                                                                                                 |
| DnaJ (Hsp40) homolog, subfamily C, member 1                                                                                                |
| spectrin alpha 2 /// similar to Spectrin alpha chain, brain (Spectrin, non-erythroid alpha chain) (Alpha-II spectrin) (Fodrin alpha chain) |
| CDC-like kinase 2                                                                                                                          |
| Crm, cramped-like (Drosophila)                                                                                                             |
| oxysterol binding protein                                                                                                                  |
| Yamaguchi sarcoma viral (v-yes-1) oncogene homolog /// similar to Yamaguchi sarcoma viral (v-yes-1) oncogene homolog                       |
| proteasome (prosome, macropain) 26S subunit, non-ATPase, 7                                                                                 |
| dolichyl-phosphate (UDP-N-acetylglucosamine) acetylglucosaminephosphotransferase 1 (GlcNAc-1-P transferase)                                |
| cytochrome P450, family 4, subfamily b, polypeptide 1                                                                                      |
| mitochondrial ribosomal protein S31                                                                                                        |
| RIKEN cDNA 2010001M06 gene                                                                                                                 |
| dedicator of cytokinesis 7                                                                                                                 |
| solute carrier family 2 (facilitated glucose transporter), member 2                                                                        |
| methyltransferase like 8                                                                                                                   |
| testis-specific serine kinase 1                                                                                                            |
| RIKEN cDNA 6230416A05 gene                                                                                                                 |
| prostaglandin E receptor 4 (subtype EP4)                                                                                                   |
| taube nuss                                                                                                                                 |
| RIKEN cDNA 5730494M16 gene                                                                                                                 |
| Rho GTPase activating protein 9                                                                                                            |
| Rho GTPase activating protein 9                                                                                                            |
| beta-1,4-N-acetyl-galactosaminyl transferase 1                                                                                             |
| RIKEN cDNA 9430029L20 gene                                                                                                                 |
| lin-7 homolog C (C. elegans)                                                                                                               |
| solute carrier family 39 (zinc transporter), member 7                                                                                      |
| RIKEN cDNA 0610007P22 gene                                                                                                                 |
| zinc finger, CCHC domain containing 3                                                                                                      |
| zinc finger, CCHC domain containing 3                                                                                                      |
| phosphatidylinositol membrane-associated 1                                                                                                 |

|                                                                                  |
|----------------------------------------------------------------------------------|
| low density lipoprotein receptor-related protein 2                               |
| prolactin-like protein A                                                         |
| F-box only protein 3                                                             |
| SEC31-like 1 (S. cerevisiae)                                                     |
| Regulator of G-protein signalling 10                                             |
| teratocarcinoma expressed, serine rich                                           |
| acyl-CoA thioesterase 8                                                          |
| PHD finger protein 1                                                             |
| Myb protein P42POP                                                               |
| aminoadipate-semialdehyde synthase                                               |
| cysteine conjugate-beta lyase 2                                                  |
| adenylate cyclase 7                                                              |
| paraspeckle protein 1                                                            |
| FXYD domain-containing ion transport regulator 5                                 |
| sarcoglycan, alpha (dystrophin-associated glycoprotein)                          |
| HIV-1 Rev binding protein                                                        |
| paxillin                                                                         |
| sex comb on midleg homolog 1                                                     |
| taurine upregulated gene 1                                                       |
| acyl-Coenzyme A dehydrogenase, short chain                                       |
| transmembrane 7 superfamily member 3                                             |
| RIKEN cDNA 2310007H09 gene                                                       |
| arginine glutamic acid dipeptide (RE) repeats                                    |
| RIKEN cDNA 2610019A05 gene                                                       |
| XPA binding protein 1                                                            |
| RIKEN cDNA 1300017J02 gene                                                       |
| protein kinase D2                                                                |
| BAI1-associated protein 2-like 1                                                 |
| guanine nucleotide binding protein, alpha 11                                     |
| RIKEN cDNA 3732412D22 gene                                                       |
| PWP1 homolog (S. cerevisiae)                                                     |
| superkiller viralicidic activity 2-like (S. cerevisiae )                         |
| Werner helicase interacting protein 1                                            |
| mitogen-activated protein kinase 6                                               |
| replication factor C (activator 1) 4                                             |
| emerin                                                                           |
| ferric-chelate reductase 1 /// similar to stromal cell derived factor receptor 2 |
| CD1d1 antigen                                                                    |
| cytochrome b-561                                                                 |
| RIKEN cDNA 6330442E10 gene                                                       |
| F-box and leucine-rich repeat protein 3                                          |
| polymerase (DNA-directed), delta 3, accessory subunit                            |
| acireductone dioxygenase 1                                                       |
| drebrin 1                                                                        |
| interferon-stimulated protein                                                    |
| pleckstrin homology, Sec7 and coiled-coil domains 3                              |
| pleckstrin homology, Sec7 and coiled-coil domains 3                              |
| RIKEN cDNA 9430080K19 gene                                                       |
| GTP binding protein 1                                                            |
| zinc finger protein 57                                                           |
| deiodinase, iodothyronine, type II                                               |
| pleckstrin and Sec7 domain containing                                            |
| GA repeat binding protein, alpha                                                 |

|                                                                                                             |
|-------------------------------------------------------------------------------------------------------------|
| casein kinase II, alpha 1 polypeptide                                                                       |
| dehydrogenase/reductase (SDR family) member 7B                                                              |
| absent in melanoma 1                                                                                        |
| DNA2 DNA replication helicase 2-like (yeast)                                                                |
| homeo box B6                                                                                                |
| interferon induced with helicase C domain 1                                                                 |
| DNA segment, Chr 15, Wayne State University 169, expressed                                                  |
| S100 calcium binding protein A8 (calgranulin A)                                                             |
| LSM14 homolog B (SCD6, <i>S. cerevisiae</i> )                                                               |
| breast carcinoma amplified sequence 3                                                                       |
| PTK2 protein tyrosine kinase 2 beta                                                                         |
| proline dehydrogenase (oxidase) 2                                                                           |
| Spi-C transcription factor (Spi-1/PU.1 related)                                                             |
| exocyst complex component 8                                                                                 |
| endothelin converting enzyme 1                                                                              |
| REV3-like, catalytic subunit of DNA polymerase zeta RAD54 like ( <i>S. cerevisiae</i> )                     |
| hemolytic complement                                                                                        |
| solute carrier family 39 (metal ion transporter), member 6                                                  |
| DNA-damage-inducible transcript 4                                                                           |
| dedicator of cyto-kinesis 2                                                                                 |
| preferentially expressed antigen in melanoma like 4 /// preferentially expressed antigen in melanoma like 5 |
| serum amyloid A 2                                                                                           |
| cysteine and histidine rich 1                                                                               |
| cysteine and histidine rich 1                                                                               |
| meiosis-specific nuclear structural protein 1                                                               |
| elongation of very long chain fatty acids (FEN1/Elo2, SUR4/Elo3, yeast)-like 3                              |
| preferentially expressed antigen in melanoma like 6                                                         |
| TBC1 domain family, member 15                                                                               |
| cDNA sequence BC053393                                                                                      |
| p21 (CDKN1A)-activated kinase 4                                                                             |
| arginine-tRNA-protein transferase 1                                                                         |
| DNA segment, Chr 5, ERATO Doi 40, expressed                                                                 |
| caudal type homeo box 1                                                                                     |
| RIKEN cDNA 2210018M03 gene                                                                                  |
| sterile alpha motif domain containing 10                                                                    |
| CD4 antigen                                                                                                 |
| expressed sequence AU016916                                                                                 |
| excision repair cross-complementing rodent repair deficiency, complementation group 5                       |
| popeye domain containing 3                                                                                  |
| cDNA sequence BC030046                                                                                      |
| interleukin 1 beta                                                                                          |
| lymphocyte antigen 6 complex, locus H                                                                       |
| selectin, platelet (p-selectin) ligand                                                                      |
| UBX domain containing 5                                                                                     |
| wingless-related MMTV integration site 11                                                                   |
| neuron navigator 1                                                                                          |
| carboxypeptidase X 1 (M14 family)                                                                           |
| neuromedin B                                                                                                |
| tetraspanin 8                                                                                               |
| Ethanolamine kinase 1                                                                                       |
| AT rich interactive domain 3A (Bright like)                                                                 |
| cDNA sequence BC025546                                                                                      |
| glucagon receptor                                                                                           |

|                                                                                          |
|------------------------------------------------------------------------------------------|
| Von Willebrand factor homolog                                                            |
| Activin receptor IIA                                                                     |
| purine rich element binding protein A                                                    |
| Nik related kinase                                                                       |
| phospholipase C, gamma 2                                                                 |
| single-stranded DNA binding protein 2                                                    |
| desmocollin 2                                                                            |
| EGF-like module containing, mucin-like, hormone receptor-like sequence 1                 |
| polycomb group ring finger 5                                                             |
| tumor necrosis factor receptor superfamily, member 9                                     |
| solute carrier family 6 (neurotransmitter transporter, betaine/GABA), member 12          |
| Rho GTPase activating protein 8                                                          |
| benzodiazapine receptor, peripheral-like 1                                               |
| wingless-related MMTV integration site 5B                                                |
| tumor necrosis factor receptor superfamily, member 21                                    |
| calcium activated nucleotidase 1                                                         |
| cadherin EGF LAG seven-pass G-type receptor 1                                            |
| RIKEN cDNA A530040E14 gene                                                               |
| cytotoxic T lymphocyte-associated protein 2 beta                                         |
| carboxylesterase 1                                                                       |
| vascular endothelial growth factor A                                                     |
| membrane protein, palmitoylated 7 (MAGUK p55 subfamily member 7)                         |
| sarcoglycan, delta (dystrophin-associated glycoprotein)                                  |
| leukocyte receptor cluster (LRC) member 8                                                |
| congenital dyserythropoietic anemia, type I (human)                                      |
| heterogeneous nuclear ribonucleoprotein L-like                                           |
| peptidyl arginine deiminase, type II /// similar to peptidyl arginine deiminase, type II |
| solute carrier family 35, member E4                                                      |
| tumor necrosis factor, alpha-induced protein 8-like 1                                    |
| Fanconi anemia, complementation group G                                                  |
| ERO1-like beta (S. cerevisiae)                                                           |
| eomesodermin homolog (Xenopus laevis)                                                    |
| hemoglobin Z, beta-like embryonic chain                                                  |
| hemoglobin, beta adult minor chain                                                       |
| hemoglobin Y, beta-like embryonic chain                                                  |
| transmembrane protein with EGF-like and two follistatin-like domains 2                   |
| eukaryotic translation initiation factor 2 alpha kinase 3                                |
| T-box 3                                                                                  |
| cytoplasmic tyrosine kinase, Dscr28C related (Drosophila)                                |
| ---                                                                                      |
| t-complex-associated testis expressed 2                                                  |
| tankyrase 1 binding protein 1                                                            |
| seizure related 6 homolog like                                                           |
| pseudouridine synthase 1                                                                 |
| RIKEN cDNA 2610019E17 gene                                                               |
| fos-like antigen 2 /// similar to fos-like antigen 2                                     |
| solute carrier family 41, member 1                                                       |
| tachykinin 2                                                                             |
| nestin                                                                                   |
| endothelin receptor type B                                                               |
| pleckstrin homology domain containing, family A member 5                                 |
| rabaptin, RAB GTPase binding effector protein 1                                          |
| minichromosome maintenance deficient 10 (S. cerevisiae)                                  |

|                                                                                                                                                                                                                                                                                   |
|-----------------------------------------------------------------------------------------------------------------------------------------------------------------------------------------------------------------------------------------------------------------------------------|
| a disintegrin and metallopeptidase domain 19 (meltrin beta)                                                                                                                                                                                                                       |
| chromatin modifying protein 4B                                                                                                                                                                                                                                                    |
| ---                                                                                                                                                                                                                                                                               |
| vacuolar protein sorting 37C (yeast)                                                                                                                                                                                                                                              |
| keratin complex 1, acidic, gene 1                                                                                                                                                                                                                                                 |
| protein kinase, cAMP dependent, catalytic, alpha                                                                                                                                                                                                                                  |
| LysM, putative peptidoglycan-binding, domain containing 2                                                                                                                                                                                                                         |
| RIKEN cDNA 1300007C21 gene /// similar to Retrovirus-related POL polyprotein (Endonuclease) /// hypothetical protein LOC666026 /// hypothetical protein LOC668280 /// similar to RIKEN cDNA 1300007C21 gene /// hypothetical protein LOC669505 /// hypothetical protein LOC672861 |
| IBR domain containing 3                                                                                                                                                                                                                                                           |
| UV radiation resistance associated gene                                                                                                                                                                                                                                           |
| RIKEN cDNA 1810009A15 gene                                                                                                                                                                                                                                                        |
| furry homolog-like (Drosophila)                                                                                                                                                                                                                                                   |
| sushi-repeat-containing protein                                                                                                                                                                                                                                                   |
| SH3-domain GRB2-like B1 (endophilin)                                                                                                                                                                                                                                              |
| C1q and tumor necrosis factor related protein 3                                                                                                                                                                                                                                   |
| leukocyte specific transcript 1                                                                                                                                                                                                                                                   |
| phosphatidylinositol-4-phosphate 5-kinase, type 1 alpha                                                                                                                                                                                                                           |
| actin-binding LIM protein 1                                                                                                                                                                                                                                                       |
| ---                                                                                                                                                                                                                                                                               |
| 6-phosphofructo-2-kinase/fructose-2,6-biphosphatase 3                                                                                                                                                                                                                             |
| target of myb1 homolog (chicken) /// similar to TOM1                                                                                                                                                                                                                              |
| RAS-related C3 botulinum substrate 2                                                                                                                                                                                                                                              |
| cDNA sequence BC013529                                                                                                                                                                                                                                                            |
| acyl-CoA thioesterase 1                                                                                                                                                                                                                                                           |
| ubiquitin-conjugating enzyme E2W (putative)                                                                                                                                                                                                                                       |
| RIKEN cDNA 5830471E12 gene                                                                                                                                                                                                                                                        |
| spastin                                                                                                                                                                                                                                                                           |
| a disintegrin and metallopeptidase domain 15 (metargidin)                                                                                                                                                                                                                         |
| keratin complex 1, acidic, gene 16                                                                                                                                                                                                                                                |
| gamma-glutamyl carboxylase                                                                                                                                                                                                                                                        |
| TAF6 RNA polymerase II, TATA box binding protein (TBP)-associated factor                                                                                                                                                                                                          |
| mitogen activated protein kinase kinase 5                                                                                                                                                                                                                                         |
| natriuretic peptide precursor type A                                                                                                                                                                                                                                              |
| F-box and leucine-rich repeat protein 15                                                                                                                                                                                                                                          |
| zinc finger protein 524                                                                                                                                                                                                                                                           |
| diacylglycerol kinase, alpha                                                                                                                                                                                                                                                      |
| dopachrome tautomerase                                                                                                                                                                                                                                                            |
| DEAH (Asp-Glu-Ala-His) box polypeptide 9                                                                                                                                                                                                                                          |
| transformed mouse 3T3 cell double minute 1                                                                                                                                                                                                                                        |
| erythrocyte protein band 4.9                                                                                                                                                                                                                                                      |
| peptidyl-tRNA hydrolase 1 homolog (S. cerevisiae)                                                                                                                                                                                                                                 |
| D-amino acid oxidase 1                                                                                                                                                                                                                                                            |
| elongation factor Tu GTP binding domain containing 1                                                                                                                                                                                                                              |
| regulator of G-protein signaling 19                                                                                                                                                                                                                                               |
| regulator of G-protein signaling 19                                                                                                                                                                                                                                               |
| regulator of G-protein signaling 19                                                                                                                                                                                                                                               |
| glutathione peroxidase 7                                                                                                                                                                                                                                                          |
| phenylalanine-tRNA synthetase 2 (mitochondrial)                                                                                                                                                                                                                                   |
| crystallin, gamma A                                                                                                                                                                                                                                                               |
| phosphodiesterase 4B, cAMP specific                                                                                                                                                                                                                                               |
| CD47 antigen (Rh-related antigen, integrin-associated signal transducer)                                                                                                                                                                                                          |
| aquaporin 2                                                                                                                                                                                                                                                                       |
| aldolase 1, A isoform, pseudogene 1                                                                                                                                                                                                                                               |

|                                                                                 |
|---------------------------------------------------------------------------------|
| nuclear factor of kappa light polypeptide gene enhancer in B-cells 2, p49/p100  |
| expressed sequence AI447904 /// cDNA sequence BC094916                          |
| procollagen, type XI, alpha 2                                                   |
| CD55 antigen                                                                    |
| creatine kinase, mitochondrial 2                                                |
| cytochrome b5 type B                                                            |
| survival motor neuron 1                                                         |
| malonyl-CoA decarboxylase                                                       |
| fibrillin 2                                                                     |
| RIKEN cDNA 2900073H19 gene                                                      |
| AFG3(ATPase family gene 3)-like 1 (yeast)                                       |
| ---                                                                             |
| lymphoid enhancer binding factor 1                                              |
| leucyl-tRNA synthetase                                                          |
| zinc finger protein 688                                                         |
| high-mobility group box 4                                                       |
| interferon dependent positive acting transcription factor 3 gamma               |
| TDP-glucose 4,6-dehydratase                                                     |
| paroxysmal nonkinesiogetic dyskinesia                                           |
| N-acetyl galactosaminidase, alpha                                               |
| formin binding protein 1                                                        |
| interferon-induced protein with tetratricopeptide repeats 2                     |
| cDNA sequence BC030183                                                          |
| Ras-GTPase-activating protein SH3-domain binding protein                        |
| zinc finger, DHHC domain containing 16                                          |
| dipeptidase 1 (renal)                                                           |
| DnaJ (Hsp40) homolog, subfamily B, member 8                                     |
| carnitine acetyltransferase                                                     |
| galactosidase, beta 1                                                           |
| tumor-associated calcium signal transducer 2                                    |
| hydroxyacid oxidase (glycolate oxidase) 3                                       |
| vacuolar protein sorting 53 (yeast)                                             |
| general transcription factor IIF, polypeptide 2                                 |
| muscle and microspikes RAS                                                      |
| nucleosome binding protein 1                                                    |
| histone deacetylase 3                                                           |
| LanC (bacterial lantibiotic synthetase component C)-like 1                      |
| metal response element binding transcription factor 2                           |
| metal response element binding transcription factor 2                           |
| peroxisomal biogenesis factor 11a                                               |
| neutrophil cytosolic factor 4                                                   |
| protein O-linked mannose beta1,2-N-acetylglucosaminyltransferase                |
| RIKEN cDNA 2810452K22 gene                                                      |
| ELOVL family member 6, elongation of long chain fatty acids (yeast)             |
| homeo box B5                                                                    |
| ATPase type 13A3                                                                |
| suppressor of Ty 6 homolog (S. cerevisiae)                                      |
| RIKEN cDNA E330034G19 gene                                                      |
| cytochrome P450, family 2, subfamily a, polypeptide 12                          |
| HIV-1 tat interactive protein 2, homolog (human)                                |
| PHD finger protein 23                                                           |
| complement component 2 (within H-2S)                                            |
| eukaryotic translation initiation factor 2, subunit 3, structural gene Y-linked |

|                                                                                                                                                                                                       |
|-------------------------------------------------------------------------------------------------------------------------------------------------------------------------------------------------------|
| roundabout homolog 1 (Drosophila)                                                                                                                                                                     |
| C1q and tumor necrosis factor related protein 1                                                                                                                                                       |
| sno, strawberry notch homolog 1 (Drosophila)                                                                                                                                                          |
| CDC23 (cell division cycle 23, yeast, homolog)                                                                                                                                                        |
| signal recognition particle receptor ('docking protein')                                                                                                                                              |
| ATPase, H+ transporting, lysosomal V0 subunit A2                                                                                                                                                      |
| expressed sequence C80913                                                                                                                                                                             |
| dihydroorotate dehydrogenase                                                                                                                                                                          |
| tektin 2                                                                                                                                                                                              |
| Transcribed locus                                                                                                                                                                                     |
| muco1ipin 2                                                                                                                                                                                           |
| ankyrin repeat domain 43                                                                                                                                                                              |
| ATP-binding cassette, sub-family C (CFTR/MRP), member 3                                                                                                                                               |
| linker for activation of T cells family, member 2                                                                                                                                                     |
| tripartite motif protein 13                                                                                                                                                                           |
| ephrin B3                                                                                                                                                                                             |
| toll-interleukin 1 receptor (TIR) domain-containing adaptor protein                                                                                                                                   |
| nucleoporin 188                                                                                                                                                                                       |
| RIKEN cDNA C330007P06 gene                                                                                                                                                                            |
| RIKEN cDNA C330007P06 gene                                                                                                                                                                            |
| expressed sequence AW061234                                                                                                                                                                           |
| frequently rearranged in advanced T-cell lymphomas 2                                                                                                                                                  |
| Frequently rearranged in advanced T-cell lymphomas 2                                                                                                                                                  |
| coiled-coil domain containing 52                                                                                                                                                                      |
| similar to integral membrane transport protein UST1R                                                                                                                                                  |
| RIKEN cDNA C730048C13 gene /// similar to integral membrane transport protein UST1R /// similar to integral membrane transport protein UST1R /// similar to integral membrane transport protein UST1R |
| DDHD domain containing 2                                                                                                                                                                              |
| sideroflexin 2 /// similar to Sideroflexin-2                                                                                                                                                          |
| complement component 3a receptor 1                                                                                                                                                                    |
| eukaryotic translation initiation factor 1A                                                                                                                                                           |
| procollagen, type I, alpha 1                                                                                                                                                                          |
| hypothetical protein LOC383216                                                                                                                                                                        |
| caspase 9                                                                                                                                                                                             |
| R3H domain 1 (binds single-stranded nucleic acids)                                                                                                                                                    |
| ubiquitin specific peptidase 9, X chromosome                                                                                                                                                          |
| RIKEN cDNA 0610009A07 gene                                                                                                                                                                            |
| scinderin                                                                                                                                                                                             |
| centrosomal protein 350                                                                                                                                                                               |
| WW domain containing E3 ubiquitin protein ligase 2                                                                                                                                                    |
| polycomb group ring finger 2                                                                                                                                                                          |
| mutS homolog 5 (E. coli)                                                                                                                                                                              |
| RE1-silencing transcription factor                                                                                                                                                                    |
| Nephronectin                                                                                                                                                                                          |
| interleukin 13 receptor, alpha 1                                                                                                                                                                      |
| Yip1 domain family, member 5                                                                                                                                                                          |
| HIV-1 Rev binding protein                                                                                                                                                                             |
| Transcribed locus                                                                                                                                                                                     |
| laminin, alpha 1                                                                                                                                                                                      |
| collagen, type XXII, alpha 1                                                                                                                                                                          |
| tuberous sclerosis 1                                                                                                                                                                                  |
| phosphatidylinositol (4,5) bisphosphate 5-phosphatase, A                                                                                                                                              |
| RIKEN cDNA 2900006A08 gene                                                                                                                                                                            |
| Abelson helper integration site                                                                                                                                                                       |



|                                                                                                                                                                          |
|--------------------------------------------------------------------------------------------------------------------------------------------------------------------------|
| wingless-related MMTV integration site 6                                                                                                                                 |
| SAM and SH3 domain containing 1                                                                                                                                          |
| glutamine fructose-6-phosphate transaminase 2                                                                                                                            |
| cDNA sequence BC037034                                                                                                                                                   |
| glucuronyl C5-epimerase                                                                                                                                                  |
| homeo box D10                                                                                                                                                            |
| unc-5 homolog C (C. elegans)                                                                                                                                             |
| RIKEN cDNA 3732412D22 gene                                                                                                                                               |
| SH3 domain binding glutamic acid-rich protein like 2                                                                                                                     |
| sorting nexin 13                                                                                                                                                         |
| suppressor of zeste 12 homolog (Drosophila)                                                                                                                              |
| RIKEN cDNA 4933407C03 gene                                                                                                                                               |
| expressed sequence AA409316                                                                                                                                              |
| striatin, calmodulin binding protein                                                                                                                                     |
| zinc finger, ZZ domain containing 3                                                                                                                                      |
| ubiquitin-conjugating enzyme E2D 3 (UBC4/5 homolog, yeast)                                                                                                               |
| SH3 domain protein D19                                                                                                                                                   |
| cDNA sequence BC023829                                                                                                                                                   |
| MBD2-interacting zinc finger                                                                                                                                             |
| bone marrow stromal cell antigen 1                                                                                                                                       |
| RIKEN cDNA 0610039J04 gene                                                                                                                                               |
| transcription factor CP2-like 1                                                                                                                                          |
| general transcription factor IIF, polypeptide 1                                                                                                                          |
| ash1 (absent, small, or homeotic)-like (Drosophila)                                                                                                                      |
| GLI-Kruppel family member HKR3                                                                                                                                           |
| sema domain, seven thrombospondin repeats (type 1 and type 1-like), transmembrane domain (TM) and short cytoplasmic domain, (semaphorin) 5A                              |
| ribonucleotide reductase M2 B (TP53 inducible)                                                                                                                           |
| coiled-coil domain containing 86                                                                                                                                         |
| interleukin 1 receptor accessory protein                                                                                                                                 |
| RIKEN cDNA 2310014L17 gene                                                                                                                                               |
| RIKEN cDNA 1110061N23 gene                                                                                                                                               |
| RIKEN cDNA F830021D11 gene /// similar to UHRF1-binding protein 1 (Ubiquitin-like containing PHD and RING finger domains 1-binding protein 1) (ICBP90-binding protein 1) |
| ankyrin repeat and KH domain containing 1                                                                                                                                |
| expressed sequence AI593864                                                                                                                                              |
| expressed sequence C76336                                                                                                                                                |
| MKL (megakaryoblastic leukemia)/myocardin-like 1                                                                                                                         |
| RIKEN cDNA 1700021F05 gene                                                                                                                                               |
| syntaxin 4A (placental)                                                                                                                                                  |
| chloride channel Ka                                                                                                                                                      |
| xenotropic and polytropic retrovirus receptor 1                                                                                                                          |
| gem (nuclear organelle) associated protein 5                                                                                                                             |
| DNA segment, Chr 5, ERATO Doi 135, expressed                                                                                                                             |
| potassium voltage-gated channel, shaker-related subfamily, member 1                                                                                                      |
| bromodomain containing 4                                                                                                                                                 |
| asparagine-linked glycosylation 3 homolog (yeast, alpha-1,3-mannosyltransferase)                                                                                         |
| NMDA receptor-regulated gene 1                                                                                                                                           |
| RAB35, member RAS oncogene family                                                                                                                                        |
| major vault protein                                                                                                                                                      |
| T-cell immunoglobulin and mucin domain containing 2                                                                                                                      |
| T-cell immunoglobulin and mucin domain containing 2                                                                                                                      |
| apoptotic peptidase activating factor 1                                                                                                                                  |
| cell division cycle 7 (S. cerevisiae)                                                                                                                                    |
| myotubularin related protein 9                                                                                                                                           |

|                                                                                                                                             |
|---------------------------------------------------------------------------------------------------------------------------------------------|
| ATP-binding cassette, sub-family C (CFTR/MRP), member 5                                                                                     |
| regulatory factor X-associated ankyrin-containing protein                                                                                   |
| peptidyl arginine deiminase, type III                                                                                                       |
| reversion-inducing-cysteine-rich protein with kazal motifs                                                                                  |
| nibrin                                                                                                                                      |
| low density lipoprotein receptor-related protein 5 /// similar to Low-density lipoprotein receptor-related protein 5 precursor (LRP7) (Lr3) |
| widely-interspaced zinc finger motifs                                                                                                       |
| golgi autoantigen, golgin subfamily a, 5                                                                                                    |
| dynein cytoplasmic 1 intermediate chain 1                                                                                                   |
| transformation related protein 63                                                                                                           |
| inversin                                                                                                                                    |
| chloride channel calcium activated 1                                                                                                        |
| Sh3 domain YSC-like 1                                                                                                                       |
| peroxisomal biogenesis factor 11b                                                                                                           |
| peroxisomal biogenesis factor 11b                                                                                                           |
| F11 receptor                                                                                                                                |
| cartilage associated protein                                                                                                                |
| solute carrier family 7 (cationic amino acid transporter, y+ system), member 7                                                              |
| src homology 2 domain-containing transforming protein D                                                                                     |
| cell division cycle 6 homolog (S. cerevisiae)                                                                                               |
| splicing factor, arginine/serine-rich 16 (suppressor-of-white-apricot homolog, Drosophila)                                                  |
| topoisomerase (DNA) III beta                                                                                                                |
| Wolfram syndrome 1 homolog (human)                                                                                                          |
| ribosomal protein S6 kinase, polypeptide 2                                                                                                  |
| zinc finger and BTB domain containing 7a                                                                                                    |
| vacuolar protein sorting 52 (yeast) /// similar to vacuolar protein sorting 52                                                              |
| hect (homologous to the E6-AP (UBE3A) carboxyl terminus) domain and RCC1 (CHC1)-like domain (RLD) 2                                         |
| snail homolog 1 (Drosophila)                                                                                                                |
| muskelin 1, intracellular mediator containing kelch motifs                                                                                  |
| tuftelin interacting protein 11                                                                                                             |
| homeodomain interacting protein kinase 2                                                                                                    |
| hippocalcin-like 1                                                                                                                          |
| WW domain binding protein 4                                                                                                                 |
| caspase 14                                                                                                                                  |
| synaptophysin-like 2                                                                                                                        |
| sphingosine kinase 1                                                                                                                        |
| RAD17 homolog (S. pombe)                                                                                                                    |
| zinc finger protein 64                                                                                                                      |
| DEAD (Asp-Glu-Ala-Asp) box polypeptide 3, Y-linked                                                                                          |
| guanine nucleotide binding protein, alpha o                                                                                                 |
| guanine nucleotide binding protein, alpha o                                                                                                 |
| solute carrier family 31, member 1                                                                                                          |
| lectin, galactose binding, soluble 7                                                                                                        |
| similar to spermiogenesis specific transcript on the Y 2                                                                                    |
| v-crk sarcoma virus CT10 oncogene homolog (avian)-like                                                                                      |
| v-crk sarcoma virus CT10 oncogene homolog (avian)-like                                                                                      |
| lysyl oxidase-like 1                                                                                                                        |
| RIKEN cDNA 2900001O04 gene                                                                                                                  |
| glutamate-rich WD repeat containing 1                                                                                                       |
| ADP-ribosylation factor-like 2                                                                                                              |
| plectin 1                                                                                                                                   |
| Era (G-protein)-like 1 (E. coli)                                                                                                            |
| Era (G-protein)-like 1 (E. coli)                                                                                                            |

|                                                                                                                                                                                                                                                                                                                                                                                                                                                                                                                                                             |
|-------------------------------------------------------------------------------------------------------------------------------------------------------------------------------------------------------------------------------------------------------------------------------------------------------------------------------------------------------------------------------------------------------------------------------------------------------------------------------------------------------------------------------------------------------------|
| DNA segment, Chr 7, Wayne State University 128, expressed                                                                                                                                                                                                                                                                                                                                                                                                                                                                                                   |
| DNA segment, Chr 7, Wayne State University 128, expressed                                                                                                                                                                                                                                                                                                                                                                                                                                                                                                   |
| DNA segment, Chr 7, Wayne State University 128, expressed                                                                                                                                                                                                                                                                                                                                                                                                                                                                                                   |
| RIKEN cDNA 5630401J11 gene                                                                                                                                                                                                                                                                                                                                                                                                                                                                                                                                  |
| RIKEN cDNA E330014E10 gene /// similar to PRAME family member 8 /// expressed sequence AU018829 /// similar to PRAME family member 8 |
| phosphatidylinositol 3-kinase catalytic delta polypeptide                                                                                                                                                                                                                                                                                                                                                                                                                                                                                                   |
| RIKEN cDNA 2210409E12 gene                                                                                                                                                                                                                                                                                                                                                                                                                                                                                                                                  |
| nuclear fragile X mental retardation protein interacting protein 1                                                                                                                                                                                                                                                                                                                                                                                                                                                                                          |
| thrombospondin 3                                                                                                                                                                                                                                                                                                                                                                                                                                                                                                                                            |
| Sec23 interacting protein                                                                                                                                                                                                                                                                                                                                                                                                                                                                                                                                   |
| ---                                                                                                                                                                                                                                                                                                                                                                                                                                                                                                                                                         |
| RIKEN cDNA 2310015N07 gene                                                                                                                                                                                                                                                                                                                                                                                                                                                                                                                                  |
| RIKEN cDNA 2310015N07 gene                                                                                                                                                                                                                                                                                                                                                                                                                                                                                                                                  |
| neugrin, neurite outgrowth associated                                                                                                                                                                                                                                                                                                                                                                                                                                                                                                                       |
| charged amino acid rich leucine zipper 1                                                                                                                                                                                                                                                                                                                                                                                                                                                                                                                    |
| solute carrier family 35, member C2                                                                                                                                                                                                                                                                                                                                                                                                                                                                                                                         |
| adaptor-related protein complex 3, beta 1 subunit                                                                                                                                                                                                                                                                                                                                                                                                                                                                                                           |
| FAD-dependent oxidoreductase domain containing 1                                                                                                                                                                                                                                                                                                                                                                                                                                                                                                            |
| pyrophosphatase (inorganic) 2                                                                                                                                                                                                                                                                                                                                                                                                                                                                                                                               |
| carboxypeptidase N, polypeptide 1                                                                                                                                                                                                                                                                                                                                                                                                                                                                                                                           |
| ATP binding domain 1 family, member C                                                                                                                                                                                                                                                                                                                                                                                                                                                                                                                       |
| PRP31 pre-mRNA processing factor 31 homolog (yeast)                                                                                                                                                                                                                                                                                                                                                                                                                                                                                                         |
| receptor accessory protein 5                                                                                                                                                                                                                                                                                                                                                                                                                                                                                                                                |
| S100 calcium binding protein A9 (calgranulin B)                                                                                                                                                                                                                                                                                                                                                                                                                                                                                                             |
| RNA binding protein gene with multiple splicing                                                                                                                                                                                                                                                                                                                                                                                                                                                                                                             |
| transducin (beta)-like 1X-linked receptor 1                                                                                                                                                                                                                                                                                                                                                                                                                                                                                                                 |
| unc-45 homolog A (C. elegans)                                                                                                                                                                                                                                                                                                                                                                                                                                                                                                                               |
| elongation factor RNA polymerase II 2                                                                                                                                                                                                                                                                                                                                                                                                                                                                                                                       |
| elongation factor RNA polymerase II 2                                                                                                                                                                                                                                                                                                                                                                                                                                                                                                                       |
| F-box protein 38                                                                                                                                                                                                                                                                                                                                                                                                                                                                                                                                            |
| Sh3kbp1 binding protein 1                                                                                                                                                                                                                                                                                                                                                                                                                                                                                                                                   |
| expressed sequence AW549877                                                                                                                                                                                                                                                                                                                                                                                                                                                                                                                                 |
| insulin-like growth factor binding protein 1                                                                                                                                                                                                                                                                                                                                                                                                                                                                                                                |
| insulin-like growth factor binding protein 1                                                                                                                                                                                                                                                                                                                                                                                                                                                                                                                |
| ATPase, class VI, type 11A                                                                                                                                                                                                                                                                                                                                                                                                                                                                                                                                  |
| centaurin, gamma 3                                                                                                                                                                                                                                                                                                                                                                                                                                                                                                                                          |
| TBC1 domain family, member 23                                                                                                                                                                                                                                                                                                                                                                                                                                                                                                                               |
| DnaJ (Hsp40) homolog, subfamily C, member 11                                                                                                                                                                                                                                                                                                                                                                                                                                                                                                                |
| insulin-like growth factor binding protein 6                                                                                                                                                                                                                                                                                                                                                                                                                                                                                                                |
| carbonic anyhydrase 12                                                                                                                                                                                                                                                                                                                                                                                                                                                                                                                                      |
| neural precursor cell expressed, developmentally down-regulated gene 4-like                                                                                                                                                                                                                                                                                                                                                                                                                                                                                 |
| neural precursor cell expressed, developmentally down-regulated gene 4-like                                                                                                                                                                                                                                                                                                                                                                                                                                                                                 |
| serologically defined colon cancer antigen 3                                                                                                                                                                                                                                                                                                                                                                                                                                                                                                                |
| copper chaperone for superoxide dismutase                                                                                                                                                                                                                                                                                                                                                                                                                                                                                                                   |
| TAF10 RNA polymerase II, TATA box binding protein (TBP)-associated factor                                                                                                                                                                                                                                                                                                                                                                                                                                                                                   |
| sulfatase modifying factor 1                                                                                                                                                                                                                                                                                                                                                                                                                                                                                                                                |
| protein phosphatase 2 (formerly 2A), regulatory subunit A (PR 65), beta isoform                                                                                                                                                                                                                                                                                                                                                                                                                                                                             |
| Sec61, alpha subunit 2 (S. cerevisiae)                                                                                                                                                                                                                                                                                                                                                                                                                                                                                                                      |
| phosphate cytidyltransferase 2, ethanolamine                                                                                                                                                                                                                                                                                                                                                                                                                                                                                                                |
| RIKEN cDNA 8430420C20 gene                                                                                                                                                                                                                                                                                                                                                                                                                                                                                                                                  |
| solute carrier family 15 (H+/peptide transporter), member 2                                                                                                                                                                                                                                                                                                                                                                                                                                                                                                 |
| cytochrome b5 reductase 1                                                                                                                                                                                                                                                                                                                                                                                                                                                                                                                                   |

|                                                                                                           |
|-----------------------------------------------------------------------------------------------------------|
| cytochrome b5 reductase 1                                                                                 |
| G protein-coupled receptor 137B                                                                           |
| 1-acylglycerol-3-phosphate O-acyltransferase 5 (lysophosphatidic acid acyltransferase, epsilon)           |
| myeloid/lymphoid or mixed lineage-leukemia translocation to 3 homolog (Drosophila)                        |
| eukaryotic translation initiation factor 4, gamma 1                                                       |
| zinc finger protein 568                                                                                   |
| shugoshin-like 1 (S. pombe)                                                                               |
| cDNA sequence BC004022                                                                                    |
| G protein-coupled receptor 162                                                                            |
| WD repeats and SOF domain containing 1                                                                    |
| sialic acid acetylerase                                                                                   |
| solute carrier family 6 (neurotransmitter transporter, GABA), member 13                                   |
| ATPase, Ca++ transporting, ubiquitous                                                                     |
| 3-hydroxyisobutyryl-Coenzyme A hydrolase                                                                  |
| similar to spectrin alpha 1                                                                               |
| guanylate cyclase 2c                                                                                      |
| protein tyrosine phosphatase, receptor type, f polypeptide (PTPRF), interacting protein (liprin), alpha 4 |
| RAD51-like 1 (S. cerevisiae)                                                                              |
| cripto, FRL-1, cryptic family 1                                                                           |
| proline-serine-threonine phosphatase-interacting protein 1                                                |
| protein phosphatase 6, catalytic subunit                                                                  |
| T-cell leukemia, homeobox 3                                                                               |
| Indian hedgehog                                                                                           |
| aquarius                                                                                                  |
| Homeo box B9                                                                                              |
| SEC22 vesicle trafficking protein homolog B (S. cerevisiae)                                               |
| regenerating islet-derived 3 alpha                                                                        |
| crystallin, lamda 1                                                                                       |
| 5-azacytidine induced gene 1                                                                              |
| transferrin receptor                                                                                      |
| transferrin receptor                                                                                      |
| PHD finger protein 13                                                                                     |
| Rap2 interacting protein                                                                                  |
| deoxynucleotidyltransferase, terminal                                                                     |
| deoxynucleotidyltransferase, terminal                                                                     |
| interferon inducible GTPase 1                                                                             |
| estrogen related receptor, alpha                                                                          |
| ectonucleoside triphosphate diphosphohydrolase 6                                                          |
| Midline 2                                                                                                 |
| midline 2                                                                                                 |
| myeloid/lymphoid or mixed-lineage leukemia 5                                                              |
| AT rich interactive domain 3B (Bright like)                                                               |
| purinergic receptor P2X, ligand-gated ion channel, 1                                                      |
| potassium inwardly-rectifying channel, subfamily J, member 1                                              |
| potassium inwardly-rectifying channel, subfamily J, member 1                                              |
| transmembrane protease, serine 2                                                                          |
| gremlin 2 homolog, cysteine knot superfamily (Xenopus laevis)                                             |
| Transcribed locus                                                                                         |
| coagulation factor X                                                                                      |
| zinc finger CCCH type containing 11A                                                                      |
| Eph receptor A2                                                                                           |
| U2 small nuclear ribonucleoprotein auxiliary factor (U2AF) 1, related sequence 2                          |
| alcohol dehydrogenase 4 (class II), pi polypeptide                                                        |

|                                                                                                                               |
|-------------------------------------------------------------------------------------------------------------------------------|
| alcohol dehydrogenase 4 (class II), pi polypeptide                                                                            |
| polycystic kidney and hepatic disease 1                                                                                       |
| mitogen activated protein kinase kinase kinase kinase 2                                                                       |
| inhibin beta-C                                                                                                                |
| myelin oligodendrocyte glycoprotein                                                                                           |
| RIKEN cDNA 1810013C15 gene                                                                                                    |
| PR domain containing 5                                                                                                        |
| FBJ osteosarcoma oncogene B                                                                                                   |
| alkaline phosphatase 5                                                                                                        |
| Nur77 downstream gene 1 /// similar to chromosome 6 open reading frame 148 /// similar to chromosome 6 open reading frame 148 |
| splA/ryanodine receptor domain and SOCS box containing 2                                                                      |
| eukaryotic translation initiation factor 2C, 2                                                                                |
| fibroblast growth factor binding protein 1                                                                                    |
| erythropoietin receptor                                                                                                       |
| kinesin family member 16B                                                                                                     |
| RIKEN cDNA 4932416N17 gene                                                                                                    |
| RIKEN cDNA 2210023G05 gene                                                                                                    |
| replication factor C (activator 1) 5                                                                                          |
| zinc finger protein 275                                                                                                       |
| phosphorylase kinase alpha 2                                                                                                  |
| golgi phosphoprotein 4                                                                                                        |
| UDP-Gal:betaGlcNAc beta 1,4- galactosyltransferase, polypeptide 2                                                             |
| epidermal growth factor receptor pathway substrate 15                                                                         |
| solute carrier family 25 (mitochondrial carrier ornithine transporter), member 15                                             |
| SAM pointed domain containing ets transcription factor                                                                        |
| zinc finger protein 99                                                                                                        |
| aldehyde oxidase 1                                                                                                            |
| gonadotropin releasing hormone receptor                                                                                       |
| gonadotropin releasing hormone receptor                                                                                       |
| hemochromatosis                                                                                                               |
| methionyl aminopeptidase 1                                                                                                    |
| gap junction membrane channel protein beta 5                                                                                  |
| acyl-CoA synthetase long-chain family member 4                                                                                |
| lactase                                                                                                                       |
| ---                                                                                                                           |
| RAP2B, member of RAS oncogene family                                                                                          |
| homeo box A11                                                                                                                 |
| M-phase phosphoprotein 10 (U3 small nucleolar ribonucleoprotein)                                                              |
| Cd300D antigen /// CD300A antigen                                                                                             |
| cytochrome P450, family 3, subfamily a, polypeptide 25 /// similar to cytochrome P450, family 3, subfamily a, polypeptide 25  |
| thimet oligopeptidase 1                                                                                                       |
| calmegin                                                                                                                      |
| patched homolog 1                                                                                                             |
| patched homolog 1                                                                                                             |
| microtubule associated serine/threonine kinase 3                                                                              |
| meningioma expressed antigen 6 (coiled-coil proline-rich)                                                                     |
| expressed sequence AI464131                                                                                                   |
| RIKEN cDNA 9130404D08 gene                                                                                                    |
| dipeptidylpeptidase 7                                                                                                         |
| RWD domain containing 4A                                                                                                      |
| RIKEN cDNA 4933434E20 gene                                                                                                    |
| expressed sequence AU021838                                                                                                   |
| RIKEN cDNA 2600009E05 gene                                                                                                    |

|                                                                                |
|--------------------------------------------------------------------------------|
| zinc finger, UBR1 type 1                                                       |
| solute carrier family 35, member B2                                            |
| RIKEN cDNA B230118G17 gene                                                     |
| TSPY-like 4                                                                    |
| ariadne ubiquitin-conjugating enzyme E2 binding protein homolog 1 (Drosophila) |
| mitogen activated protein kinase 8                                             |
| cysteinyl-tRNA synthetase                                                      |
| ring finger protein (C3H2C3 type) 6                                            |
| zinc finger RNA binding protein                                                |
| TIP41, TOR signalling pathway regulator-like (S. cerevisiae)                   |
| triple functional domain (PTPRF interacting)                                   |
| DNA segment, Chr 16, Brigham & Women's Genetics 1543 expressed                 |
| DNA segment, Chr 16, Brigham & Women's Genetics 1543 expressed                 |
| GrpE-like 1, mitochondrial                                                     |
| RIKEN cDNA 1110018J12 gene                                                     |
| chromodomain helicase DNA binding protein 8                                    |
| zinc finger CCHC-type and RNA binding motif 1                                  |
| target of myb1-like 1 (chicken)                                                |
| solute carrier family 9 (sodium/hydrogen exchanger), isoform 3 regulator 2     |
| ER degradation enhancer, mannosidase alpha-like 1                              |
| expressed sequence AW548124                                                    |
| tubulin, gamma complex associated protein 3                                    |
| Striatin, calmodulin binding protein 4                                         |
| spermatogenesis associated, serine-rich 2                                      |
| p300/CBP-associated factor                                                     |
| transportin 2 (importin 3, karyopherin beta 2b)                                |
| serum amyloid P-component                                                      |
| CUG triplet repeat, RNA binding protein 1                                      |
| mitogen activated protein kinase kinase kinase 3                               |
| RIKEN cDNA 1190017O12 gene                                                     |
| RIKEN cDNA 1110049G11 gene                                                     |
| RIKEN cDNA 1110049G11 gene                                                     |
| dual-specificity tyrosine-(Y)-phosphorylation regulated kinase 1a              |
| PDGFA associated protein 1                                                     |
| RAB12, member RAS oncogene family                                              |
| cadherin 5                                                                     |
| RIKEN cDNA 2900042B11 gene                                                     |
| dimethylglycine dehydrogenase precursor                                        |
| DNA segment, Chr 10, ERATO Doi 641, expressed                                  |
| BCL2/adenovirus E1B interacting protein 1, NIP1                                |
| RIKEN cDNA 2810026P18 gene                                                     |
| CDC23 (cell division cycle 23, yeast, homolog)                                 |
| tetraspanin 9                                                                  |
| ubiquitin specific peptidase 48 /// hypothetical protein LOC674195             |
| lymphocyte specific 1                                                          |
| PDZ and LIM domain 4                                                           |
| expressed sequence AU040320                                                    |
| origin recognition complex, subunit 4-like (S. cerevisiae)                     |
| budding uninhibited by benzimidazoles 1 homolog (S. cerevisiae)                |
| peroxisomal membrane protein 2                                                 |
| peptidoglycan recognition protein 1                                            |
| polymerase I and transcript release factor                                     |
| solute carrier family 9 (sodium/hydrogen exchanger), member 8                  |

|                                                                                                |
|------------------------------------------------------------------------------------------------|
| HtrA serine peptidase 2                                                                        |
| ATPase family, AAA domain containing 3A                                                        |
| Crx opposite strand transcript 1                                                               |
| exportin 6                                                                                     |
| sno, strawberry notch homolog 1 (Drosophila)                                                   |
| Rab6 interacting protein 1                                                                     |
| F-box only protein 21                                                                          |
| GATA zinc finger domain containing 2A                                                          |
| RAB21, member RAS oncogene family                                                              |
| ER degradation enhancer, mannosidase alpha-like 3                                              |
| proteasome (prosome, macropain) activator subunit 4                                            |
| DNA segment, Chr 5, ERATO Doi 593, expressed                                                   |
| RIKEN cDNA 2310040A13 gene                                                                     |
| RIKEN cDNA 2810037C14 gene                                                                     |
| RIKEN cDNA 2610024E20 gene                                                                     |
| RIKEN cDNA 5330431N19 gene                                                                     |
| junction plakoglobin                                                                           |
| RIKEN cDNA D330001F17 gene                                                                     |
| FCH domain only 1                                                                              |
| biliverdin reductase A                                                                         |
| ring finger protein 12                                                                         |
| cleavage stimulation factor, 3' pre-RNA subunit 2, tau                                         |
| DNA Segment, Chr 15, Mouse Genome Informatics 27                                               |
| cytochrome P450, family 4, subfamily f, polypeptide 13                                         |
| G protein-coupled receptor 175                                                                 |
| COX4 neighbor                                                                                  |
| ganglioside-induced differentiation-associated-protein 2                                       |
| ADP-ribosylation factor-like 3                                                                 |
| discs, large homolog-associated protein 4 (Drosophila)                                         |
| ATP-binding cassette, sub-family A (ABC1), member 2                                            |
| platelet-activating factor acetylhydrolase 2                                                   |
| procollagen-proline, 2-oxoglutarate 4-dioxygenase (proline 4-hydroxylase), alpha 1 polypeptide |
| nodal modulator 1                                                                              |
| DNA segment, Chr 15, Wayne State University 75, expressed                                      |
| integrator complex subunit 8                                                                   |
| coatomer protein complex, subunit zeta 2                                                       |
| GTP binding protein 2                                                                          |
| Treacher Collins Franceschetti syndrome 1, homolog                                             |
| Ras interacting protein 1                                                                      |
| N-acetylneuraminic acid synthase (sialic acid synthase)                                        |
| hexose-6-phosphate dehydrogenase (glucose 1-dehydrogenase)                                     |
| nuclear factor of kappa light chain gene enhancer in B-cells inhibitor, alpha                  |
| leucine-rich repeats and calponin homology (CH) domain containing 4                            |
| leucine-rich repeats and calponin homology (CH) domain containing 4                            |
| serine/threonine kinase 40                                                                     |
| isovaleryl coenzyme A dehydrogenase                                                            |
| transformation related protein 53                                                              |
| activating transcription factor 3                                                              |
| activating transcription factor 3                                                              |
| expressed sequence C78212                                                                      |
| SNW domain containing 1                                                                        |
| CEA-related cell adhesion molecule 9                                                           |
| acid phosphatase 1, soluble                                                                    |

|                                                                                |
|--------------------------------------------------------------------------------|
| cleavage and polyadenylation specific factor 2                                 |
| importin 8                                                                     |
| trypsin domain containing 1                                                    |
| vanin 1                                                                        |
| renal tumor antigen                                                            |
| ARP2 actin-related protein 2 homolog (yeast)                                   |
| zinc finger protein of the cerebellum 1                                        |
| mitogen activated protein kinase 8 interacting protein 1                       |
| crystallin, gamma D                                                            |
| folate receptor 2 (fetal)                                                      |
| membrane-spanning 4-domains, subfamily A, member 1                             |
| ectonucleotide pyrophosphatase/phosphodiesterase 1                             |
| discs, large homolog 4 (Drosophila)                                            |
| hypothetical protein LOC637741                                                 |
| radical S-adenosyl methionine domain containing 2                              |
| expressed sequence AI788669                                                    |
| RAS-related C3 botulinum substrate 3                                           |
| vanin 3                                                                        |
| hepatocyte growth factor activator                                             |
| ---                                                                            |
| natriuretic peptide precursor type B                                           |
| protease, serine, 32                                                           |
| male-specific lethal 2-like 1 (Drosophila)                                     |
| methyl-CpG binding domain protein 6                                            |
| Notch gene homolog 2 (Drosophila)                                              |
| Tnf receptor-associated factor 6                                               |
| Tnf receptor-associated factor 6                                               |
| zinc finger, X-linked, duplicated A                                            |
| translocated promoter region                                                   |
| RIKEN cDNA 2810485I05 gene                                                     |
| hephaestin                                                                     |
| RIKEN cDNA 5730408K05 gene                                                     |
| zinc finger, MYM-type 4                                                        |
| RNA binding motif protein 9                                                    |
| CUB domain containing protein 1                                                |
| tigger transposable element derived 5                                          |
| solute carrier family 5 (sodium-dependent vitamin transporter), member 6       |
| placental specific protein 1                                                   |
| transmembrane protein 1                                                        |
| aggrecan 1                                                                     |
| RIKEN cDNA 5730557B15 gene                                                     |
| RIKEN cDNA 6330505N24 gene                                                     |
| phosphatidylinositol 4-kinase, catalytic, alpha polypeptide                    |
| cysteine and histidine rich 1                                                  |
| integrin alpha 3                                                               |
| integrin alpha 3                                                               |
| leucine-rich PPR-motif containing                                              |
| ---                                                                            |
| solute carrier family 7 (cationic amino acid transporter, y+ system), member 8 |
| activating transcription factor 6                                              |
| soc-2 (suppressor of clear) homolog (C. elegans)                               |
| glycerophosphodiester phosphodiesterase domain containing 3                    |
| polybromo 1                                                                    |



|                                                                                                                                                                       |
|-----------------------------------------------------------------------------------------------------------------------------------------------------------------------|
| RIKEN cDNA 2610205E22 gene                                                                                                                                            |
| similar to Mothers against decapentaplegic homolog 6 (SMAD 6) (Mothers against DPP homolog 6) (Smad6) (Mad homolog 7)                                                 |
| solute carrier family 7 (cationic amino acid transporter, y+ system), member 5                                                                                        |
| geranylgeranyl diphosphate synthase 1                                                                                                                                 |
| sorting nexin 5                                                                                                                                                       |
| G protein-coupled receptor 97                                                                                                                                         |
| PREDICTED: Mus musculus similar to Rap guanine nucleotide exchange factor 2 (PDZ domain containing guanine nucleotide exchange factor 1) (PDZ-GEF1) (LOC620996), mRNA |
| RIKEN cDNA 2610200G18 gene                                                                                                                                            |
| DNA cross-link repair 1A, PSO2 homolog (S. cerevisiae)                                                                                                                |
| heterogeneous nuclear ribonucleoprotein H3 /// similar to heterogeneous nuclear ribonucleoprotein H3 isoform a                                                        |
| gap junction membrane channel protein beta 3                                                                                                                          |
| TEA domain family member 1                                                                                                                                            |
| mitochondrial ribosomal protein S25                                                                                                                                   |
| unc-84 homolog B (C. elegans)                                                                                                                                         |
| pterin 4 alpha carbinolamine dehydratase/dimerization cofactor of hepatocyte nuclear factor 1 alpha (TCF1) 2                                                          |
| ADP-ribosyltransferase 5                                                                                                                                              |
| tetraspanin 32                                                                                                                                                        |
| cut-like 1 (Drosophila)                                                                                                                                               |
| myocyte enhancer factor 2D                                                                                                                                            |
| RIKEN cDNA 6530401N04 gene                                                                                                                                            |
| RIKEN cDNA 6530401N04 gene                                                                                                                                            |
| MAP/microtubule affinity-regulating kinase 2                                                                                                                          |
| restin (Reed-Steinberg cell-expressed intermediate filament-associated protein)                                                                                       |
| additional sex combs like 1 (Drosophila)                                                                                                                              |
| zinc finger, FYVE domain containing 19                                                                                                                                |
| signal sequence receptor, gamma                                                                                                                                       |
| signal sequence receptor, gamma                                                                                                                                       |
| leucine rich repeat containing 8A                                                                                                                                     |
| expressed sequence AU020206                                                                                                                                           |
| myeloid/lymphoid or mixed lineage-leukemia translocation to 1 homolog (Drosophila)                                                                                    |
| Ral GEF with PH domain and SH3 binding motif 2                                                                                                                        |
| formin homology 2 domain containing 3                                                                                                                                 |
| pleckstrin homology, Sec7 and coiled-coil domains, binding protein                                                                                                    |
| pleckstrin homology, Sec7 and coiled-coil domains, binding protein                                                                                                    |
| acylphosphatase 2, muscle type                                                                                                                                        |
| chromobox homolog 5 (Drosophila HP1a)                                                                                                                                 |
| expressed sequence AW112037                                                                                                                                           |
| additional sex combs like 1 (Drosophila)                                                                                                                              |
| parathyroid hormone-like peptide                                                                                                                                      |
| zinc finger, MYM-type 6                                                                                                                                               |
| LPS-responsive beige-like anchor                                                                                                                                      |
| kinase insert domain protein receptor                                                                                                                                 |
| gene model 98, (NCBI)                                                                                                                                                 |
| solute carrier family 23 (nucleobase transporters), member 2                                                                                                          |
| interleukin 6 receptor, alpha                                                                                                                                         |
| synaptotagmin V                                                                                                                                                       |
| adrenergic receptor kinase, beta 1                                                                                                                                    |
| adrenomedullin receptor                                                                                                                                               |
| mitogen activated protein kinase kinase kinase 4                                                                                                                      |
| bile acid-Coenzyme A: amino acid N-acyltransferase                                                                                                                    |
| copine III                                                                                                                                                            |
| transformation related protein 53                                                                                                                                     |
| GLI pathogenesis-related 2                                                                                                                                            |

|                                                                                                                                                         |
|---------------------------------------------------------------------------------------------------------------------------------------------------------|
| asparagine-linked glycosylation 2 homolog (yeast, alpha-1,3-mannosyltransferase)                                                                        |
| polymerase (RNA) II (DNA directed) polypeptide F                                                                                                        |
| synuclein, gamma                                                                                                                                        |
| expressed sequence AW112037                                                                                                                             |
| TBC1 domain family, member 15                                                                                                                           |
| RIKEN cDNA 5031439G07 gene                                                                                                                              |
| 3-hydroxy-3-methylglutaryl-Coenzyme A reductase                                                                                                         |
| solute carrier family 38, member 4                                                                                                                      |
| SUMO/sentrin specific peptidase 3                                                                                                                       |
| cullin 4A                                                                                                                                               |
| ATP-binding cassette, sub-family B (MDR/TAP), member 8                                                                                                  |
| caspase 8 associated protein 2                                                                                                                          |
| caspase 8 associated protein 2                                                                                                                          |
| eyes absent 2 homolog (Drosophila)                                                                                                                      |
| kelch-like 21 (Drosophila)                                                                                                                              |
| inhibitor of Bruton agammaglobulinemia tyrosine kinase                                                                                                  |
| heterogeneous nuclear ribonucleoprotein U-like 2                                                                                                        |
| importin 11                                                                                                                                             |
| ---                                                                                                                                                     |
| zinc finger, DHHC domain containing 14                                                                                                                  |
| IQ motif containing GTPase activating protein 1                                                                                                         |
| RIKEN cDNA 2410018G20 gene                                                                                                                              |
| COMM domain containing 9                                                                                                                                |
| polymerase (RNA) III (DNA directed) polypeptide K                                                                                                       |
| polymerase (RNA) III (DNA directed) polypeptide K                                                                                                       |
| arginyl-tRNA synthetase-like                                                                                                                            |
| dipeptidylpeptidase 3                                                                                                                                   |
| integrin alpha X                                                                                                                                        |
| glucose 6 phosphatase, catalytic, 3                                                                                                                     |
| UBX domain containing 2                                                                                                                                 |
| abhydrolase domain containing 14A                                                                                                                       |
| phosphoglucomutase 2                                                                                                                                    |
| RIKEN cDNA 1110032A03 gene                                                                                                                              |
| Rho GTPase activating protein 1                                                                                                                         |
| guanine nucleotide binding protein, alpha 13                                                                                                            |
| chromosome segregation 1-like (S. cerevisiae)                                                                                                           |
| peroxisome biogenesis factor 5                                                                                                                          |
| pyridoxal (pyridoxine, vitamin B6) kinase                                                                                                               |
| cytoskeleton associated protein 2                                                                                                                       |
| ketoheokinase                                                                                                                                           |
| TAR DNA binding protein                                                                                                                                 |
| melanocortin 2 receptor accessory protein                                                                                                               |
| ADP-dependent glucokinase                                                                                                                               |
| expressed sequence AI265322                                                                                                                             |
| aquaporin 9                                                                                                                                             |
| AT rich interactive domain 1A (Swi1 like) /// similar to AT rich interactive domain 1A isoform a /// similar to AT rich interactive domain 1A isoform a |
| AT rich interactive domain 1A (Swi1 like) /// similar to AT rich interactive domain 1A isoform a /// similar to AT rich interactive domain 1A isoform a |
| AT rich interactive domain 1A (Swi1 like) /// similar to AT rich interactive domain 1A isoform a /// similar to AT rich interactive domain 1A isoform a |
| pentatricopeptide repeat domain 2                                                                                                                       |
| DNA segment, Chr 17, human D6S56E 5                                                                                                                     |
| RIKEN cDNA 2310004I24 gene                                                                                                                              |
| kinesin family member C3                                                                                                                                |
| ribokinase                                                                                                                                              |

|                                                                          |
|--------------------------------------------------------------------------|
| plakophilin 2                                                            |
| plakophilin 2                                                            |
| pygopus 2                                                                |
| methyl-CpG binding domain protein 1                                      |
| RIKEN cDNA 2310014H01 gene                                               |
| phospholipase A2, group XIIA                                             |
| phospholipase A2, group XIIA                                             |
| kallikrein B, plasma 1                                                   |
| exocyst complex component 7                                              |
| acyl-Coenzyme A binding domain containing 6                              |
| brain and reproductive organ-expressed protein                           |
| Smad nuclear interacting protein 1                                       |
| src homology 2 domain-containing transforming protein C1                 |
| GDP-mannose pyrophosphorylase B                                          |
| bromodomain containing 4                                                 |
| RIKEN cDNA 2500002G23 gene                                               |
| colony stimulating factor 1 receptor                                     |
| fusion, derived from t(12;16) malignant liposarcoma (human)              |
| TAF9 RNA polymerase II, TATA box binding protein (TBP)-associated factor |
| DNA segment, Chr 10, ERATO Doi 610, expressed                            |
| supervillin                                                              |
| zinc finger protein 637                                                  |
| ubiquitin-conjugating enzyme E2O                                         |
| corneodesmosin                                                           |
| MAP kinase-activated protein kinase 5                                    |
| secretory carrier membrane protein 2                                     |
| cDNA sequence BC039093                                                   |
| ---                                                                      |
| microtubule-associated protein, RP/EB family, member 3                   |
| keratin complex 2, basic, gene 6a                                        |
| keratin complex 2, basic, gene 6a                                        |
| diacylglycerol O-acyltransferase 1                                       |
| abhydrolase domain containing 8                                          |
| androgen-induced proliferation inhibitor                                 |
| serine (or cysteine) peptidase inhibitor, clade A, member 3N             |
| sparc/osteonectin, cwcv and kazal-like domains proteoglycan 2            |
| histone deacetylase 5                                                    |
| paraoxonase 2                                                            |
| solute carrier family 35 (CMP-sialic acid transporter), member 1         |
| nuclear receptor subfamily 1, group H, member 3                          |
| mast cell protease 4                                                     |
| collapsin response mediator protein 1                                    |
| Integrin alpha V                                                         |
| integrin alpha V                                                         |
| solute carrier family 23 (nucleobase transporters), member 1             |
| chemokine (C-C motif) ligand 9                                           |
| RIKEN cDNA 1700017B05 gene /// hypothetical protein LOC640563            |
| acidic (leucine-rich) nuclear phosphoprotein 32 family, member A         |
| chloride channel 7                                                       |
| chloride channel 7                                                       |
| RIKEN cDNA 2810453I06 gene                                               |
| ATP-binding cassette, sub-family B (MDR/TAP), member 10                  |
| inositol 1,4,5-trisphosphate 3-kinase B                                  |

|                                                                                                                                                    |
|----------------------------------------------------------------------------------------------------------------------------------------------------|
| zinc and ring finger 2                                                                                                                             |
| tetraspanin 33                                                                                                                                     |
| cleavage stimulation factor, 3' pre-RNA subunit 2                                                                                                  |
| YKT6 homolog (S. Cerevisiae)                                                                                                                       |
| RIKEN cDNA 6430526N21 gene                                                                                                                         |
| general transcription factor IIIC, polypeptide 4                                                                                                   |
| ---                                                                                                                                                |
| N-acetyltransferase 12                                                                                                                             |
| Adult male pituitary gland cDNA, RIKEN full-length enriched library, clone:5330439J20 product:unclassifiable, full insert sequence                 |
| prostaglandin E synthase                                                                                                                           |
| activated leukocyte cell adhesion molecule                                                                                                         |
| SRY-box containing gene 18                                                                                                                         |
| glutamate receptor, ionotropic, kainate 5 (gamma 2)                                                                                                |
| midnolin                                                                                                                                           |
| RIKEN cDNA D930048N14 gene                                                                                                                         |
| guanine nucleotide binding protein, alpha inhibiting 1                                                                                             |
| solute carrier family 35 (UDP-glucuronic acid/UDP-N-acetylgalactosamine dual transporter), member D1                                               |
| Guanine nucleotide binding protein, alpha o                                                                                                        |
| Adult male corpora quadrigemina cDNA, RIKEN full-length enriched library, clone:B230341P20 product:inferred: forkhead box P1, full insert sequence |
| FMS-like tyrosine kinase 4                                                                                                                         |
| FMS-like tyrosine kinase 4                                                                                                                         |
| zinc and ring finger 2                                                                                                                             |
| fibronectin type III domain containing 3a                                                                                                          |
| nitric oxide synthase 2, inducible, macrophage                                                                                                     |
| flavin containing monooxygenase 3                                                                                                                  |
| protein tyrosine phosphatase, receptor type, N /// similar to Receptor-type tyrosine-protein phosphatase-like N precursor (R-PTP-N) (PTP IA-2)     |
| denticleless homolog (Drosophila)                                                                                                                  |
| complement component 9                                                                                                                             |
| InaD-like (Drosophila)                                                                                                                             |
| SET binding factor 2                                                                                                                               |
| megakaryocyte-associated tyrosine kinase                                                                                                           |
| histocompatibility 2, O region beta locus                                                                                                          |
| CD96 antigen                                                                                                                                       |
| protein kinase C, theta                                                                                                                            |
| Rho family GTPase 2                                                                                                                                |
| ATPase type 13A2 /// similar to ATPase type 13A2                                                                                                   |
| expressed sequence AA407659                                                                                                                        |
| immunoglobulin superfamily, member 10                                                                                                              |
| interleukin 1 family, member 5 (delta)                                                                                                             |
| zinc finger protein 30                                                                                                                             |
| zinc finger protein 30                                                                                                                             |
| N-acetyltransferase 6                                                                                                                              |
| Y box protein 2                                                                                                                                    |
| tripartite motif protein 3                                                                                                                         |
| RAB14, member RAS oncogene family                                                                                                                  |
| chemokine (C-C motif) receptor 7                                                                                                                   |
| RIKEN cDNA 9430098E02 gene                                                                                                                         |
| RIKEN cDNA 4631408O11 gene                                                                                                                         |
| RIKEN cDNA 4933428G09 gene                                                                                                                         |
| RIKEN cDNA 4933428G09 gene                                                                                                                         |
| microsomal triglyceride transfer protein                                                                                                           |
| glycine receptor, beta subunit                                                                                                                     |
| (ORF 1) and reverse transcriptase (ORF 2) genes                                                                                                    |

|                                                                                     |
|-------------------------------------------------------------------------------------|
| solute carrier family 11 (proton-coupled divalent metal ion transporters), member 2 |
| follistatin-like 3                                                                  |
| SAP30-like                                                                          |
| postmeiotic segregation increased 2 (S. cerevisiae)                                 |
| calcium/calmodulin-dependent protein kinase IV                                      |
| RIKEN cDNA 5730589K01 gene                                                          |
| Vacuolar protein sorting 13C (yeast)                                                |
| transcription factor 3                                                              |
| calcium channel, voltage-dependent, T type, alpha 1G subunit                        |
| phosphatidylinositol 3-kinase, catalytic, alpha polypeptide                         |
| hypermethylated in cancer 1                                                         |
| UTP20, small subunit (SSU) processome component, homolog (yeast)                    |
| KDEL (Lys-Asp-Glu-Leu) endoplasmic reticulum protein retention receptor 3           |
| DNA segment, Chr 4, Wayne State University 114, expressed                           |
| carboxypeptidase D                                                                  |
| inner centromere protein                                                            |
| podoplanin                                                                          |
| UTP14, U3 small nucleolar ribonucleoprotein, homolog A (yeast)                      |
| similar to Histone deacetylase 6 (HD6) (Histone deacetylase mHDA2)                  |
| ATP binding domain 1 family, member B                                               |
| opioid receptor-like 1                                                              |
| expressed sequence AA408278                                                         |
| retinoblastoma-like 1 (p107)                                                        |
| Transcribed locus                                                                   |
| purinergic receptor P2Y, G-protein coupled 2                                        |
| desmoglein 2                                                                        |
| eukaryotic elongation factor-2 kinase                                               |
| epimorphin                                                                          |
| procollagen, type IX, alpha 1                                                       |
| sulfotransferase family 2A, dehydroepiandrosterone (DHEA)-preferring, member 2      |
| RIKEN cDNA 4930527D15 gene                                                          |
| alpha-2-macroglobulin                                                               |
| H2A histone family, member J                                                        |
| RIKEN cDNA 5730407K14 gene                                                          |
| syntrophin, basic 2                                                                 |
| putative homeodomain transcription factor 2                                         |
| early B-cell factor 3                                                               |
| neuropilin 2                                                                        |
| RIKEN cDNA C820004L04 gene                                                          |
| kallikrein 1-related peptidase b5                                                   |
| kallikrein 1-related peptidase b8                                                   |
| kallikrein 1-related peptidase b8                                                   |
| homer homolog 1 (Drosophila)                                                        |
| homer homolog 1 (Drosophila)                                                        |
| iduronidase, alpha-L-                                                               |
| vesicle-associated membrane protein, associated protein B and C                     |
| coiled-coil domain containing 94                                                    |
| protein kinase N2                                                                   |
| sodium channel, voltage-gated, type VIII, alpha                                     |
| sodium channel, voltage-gated, type VIII, alpha                                     |
| nuclear receptor subfamily 1, group I, member 3                                     |
| nuclear receptor subfamily 1, group I, member 3                                     |
| NCK associated protein 1 like                                                       |

|                                                            |
|------------------------------------------------------------|
| cholesterol 25-hydroxylase                                 |
| calcium channel, voltage-dependent, alpha2/delta subunit 1 |
| uroplakin 3B                                               |
| RIKEN cDNA 2410004N09 gene                                 |
| epsin 1                                                    |
| RIKEN cDNA 5730508B09 gene                                 |
| claudin 5                                                  |
| crystallin, beta A1                                        |
| inter-alpha trypsin inhibitor, heavy chain 2               |
| intersectin 1 (SH3 domain protein 1A)                      |
| leucine rich repeat containing 8 family, member C          |
| glycolipid transfer protein                                |
| protein phosphatase 1M                                     |
| transcription factor EB                                    |
| RAD51 homolog (S. cerevisiae)                              |
| zinc finger, HIT domain containing 2                       |
| calcium modulating ligand                                  |
| protein kinase C, delta                                    |
| translocase of outer mitochondrial membrane 34             |
| proviral integration site 1                                |
| phosphoglucomutase 1                                       |
| YME1-like 1 (S. cerevisiae)                                |
| MAD homolog 2 (Drosophila)                                 |
| RIKEN cDNA 0610042C05 gene                                 |
| prostaglandin I2 (prostacyclin) synthase                   |
| sulfotransferase family 1B, member 1                       |
| proteinase 3                                               |
| RIKEN cDNA 4930517K11 gene                                 |
| casein kinase II, alpha 1 polypeptide                      |
| casein kinase II, alpha 1 polypeptide                      |
| dihydrofolate reductase                                    |
| pleckstrin homology-like domain, family A, member 2        |
| aquarius                                                   |
| cytochrome P450, family 2, subfamily s, polypeptide 1      |
| cullin 7                                                   |
| nuclear receptor subfamily 2, group F, member 6            |
| myozenin 1                                                 |
| RIKEN cDNA 4933426K21 gene                                 |
| phosphatidylinositol transfer protein, beta                |
| REST corepressor 1                                         |
| cDNA sequence BC003940                                     |
| solute carrier family 25, member 28                        |
| general transcription factor IIIC, polypeptide 5           |
| RIKEN cDNA 5730403M16 gene                                 |
| secretogranin III                                          |
| adaptor-related protein complex AP-4, sigma 1              |
| argininosuccinate lyase                                    |
| mitochondrial ribosomal protein L46                        |
| myeloid/lymphoid or mixed-lineage leukemia 1               |
| myeloid/lymphoid or mixed-lineage leukemia 1               |
| chemokine (C-X-C motif) ligand 4                           |
| zinc finger, CCHC domain containing 6                      |
| bolA-like 2 (E. coli)                                      |

|                                                                                                                                                                |
|----------------------------------------------------------------------------------------------------------------------------------------------------------------|
| RIKEN cDNA 5730453I16 gene                                                                                                                                     |
| Sloan-Kettering viral oncogene homolog                                                                                                                         |
| mutL homolog 1 (E. coli)                                                                                                                                       |
| actinin, alpha 1                                                                                                                                               |
| actinin, alpha 1                                                                                                                                               |
| phospholipase C, delta 1                                                                                                                                       |
| zinc finger, DHHC domain containing 6 /// similar to Probable palmitoyltransferase ZDHHC6 (Zinc finger DHHC domain-containing protein 6) (DHHC-6) (H4 homolog) |
| zinc finger, DHHC domain containing 6                                                                                                                          |
| zinc finger, DHHC domain containing 6                                                                                                                          |
| crumbs homolog 3 (Drosophila)                                                                                                                                  |
| crumbs homolog 3 (Drosophila)                                                                                                                                  |
| splicing factor, arginine/serine-rich 1 (ASF/SF2)                                                                                                              |
| laminin, alpha 4                                                                                                                                               |
| hepcidin antimicrobial peptide 1                                                                                                                               |
| expressed sequence C80913                                                                                                                                      |
| myocyte enhancer factor 2C                                                                                                                                     |
| myocyte enhancer factor 2C                                                                                                                                     |
| myocyte enhancer factor 2C                                                                                                                                     |
| coiled-coil domain containing 101                                                                                                                              |
| S100 calcium binding protein A14                                                                                                                               |
| stromal antigen 2                                                                                                                                              |
| guanylate nucleotide binding protein 2                                                                                                                         |
| dual specificity phosphatase 1                                                                                                                                 |
| FIP1 like 1 (S. cerevisiae)                                                                                                                                    |
| thrombomodulin                                                                                                                                                 |
| Wiskott-Aldrich syndrome protein interacting protein                                                                                                           |
| glutathione S-transferase, theta 2                                                                                                                             |
| zinc finger protein 96                                                                                                                                         |
| adiponectin receptor 2                                                                                                                                         |
| CD52 antigen                                                                                                                                                   |
| reticulon 2 (Z-band associated protein)                                                                                                                        |
| TM2 domain containing 1                                                                                                                                        |
| heterogeneous nuclear ribonucleoprotein U-like 2                                                                                                               |
| peroxisome proliferative activated receptor, gamma, coactivator-related 1                                                                                      |
| WD repeat domain 26                                                                                                                                            |
| WD repeat domain 26                                                                                                                                            |
| glypican 1                                                                                                                                                     |
| galactose-1-phosphate uridyl transferase                                                                                                                       |
| galactose-1-phosphate uridyl transferase                                                                                                                       |
| RIKEN cDNA 0610005C13 gene                                                                                                                                     |
| retinoblastoma binding protein 9                                                                                                                               |
| sphingosine kinase 2                                                                                                                                           |
| transmembrane protein 68                                                                                                                                       |
| membrane-associated ring finger (C3HC4) 6                                                                                                                      |
| transcription elongation factor A (SII), 2                                                                                                                     |
| transducin-like enhancer of split 3, homolog of Drosophila E(spl)                                                                                              |
| expressed sequence AU024582                                                                                                                                    |
| DnaJ (Hsp40) homolog, subfamily B, member 6                                                                                                                    |
| CKLF-like MARVEL transmembrane domain containing 8                                                                                                             |
| CDP-diacylglycerol synthase (phosphatidate cytidylyltransferase) 2                                                                                             |
| mannosidase 2, alpha 1                                                                                                                                         |
| ankyrin repeat and SOCS box-containing protein 3                                                                                                               |
| cDNA sequence BC021611                                                                                                                                         |

|                                                                                    |
|------------------------------------------------------------------------------------|
| cDNA sequence BC021611                                                             |
| cDNA sequence BC021611                                                             |
| disabled homolog 2 (Drosophila)                                                    |
| LIM and senescent cell antigen-like domains 1                                      |
| gap junction membrane channel protein alpha 7                                      |
| glutathione S-transferase, mu 6                                                    |
| glutathione S-transferase, mu 6                                                    |
| ADP-ribosyltransferase 1                                                           |
| Josephin domain containing 3                                                       |
| Josephin domain containing 3                                                       |
| similar to gonadotropin inducible ovarian transcription factor 1                   |
| C-type lectin domain family 4, member f                                            |
| WW, C2 and coiled-coil domain containing 1                                         |
| kinesin family member 4                                                            |
| Kruppel-like factor 7 (ubiquitous)                                                 |
| growth differentiation factor 15                                                   |
| prostaglandin-endoperoxide synthase 2                                              |
| phosphofurin acidic cluster sorting protein 1                                      |
| acetylcholinesterase                                                               |
| sorting nexin 14                                                                   |
| potassium channel, subfamily K, member 2                                           |
| RAB8B, member RAS oncogene family /// similar to RAB8B, member RAS oncogene family |
| actin-like 6B                                                                      |
| T-box 2                                                                            |
| leukemia inhibitory factor receptor                                                |
| leukemia inhibitory factor receptor                                                |
| leukemia inhibitory factor receptor                                                |
| suppression inducing transmembrane adaptor 1                                       |
| RIKEN cDNA A630051L19 gene                                                         |
| tumor necrosis factor receptor superfamily, member 18                              |
| phosphatidylinositol-4-phosphate 5-kinase, type 1 beta                             |
| checkpoint suppressor 1                                                            |
| checkpoint suppressor 1                                                            |
| zinc finger protein 653                                                            |
| leucine rich repeat containing 23                                                  |
| interferon regulatory factor 7                                                     |
| RIKEN cDNA 1700065A05 gene                                                         |
| AMP deaminase 3                                                                    |
| frizzled-related protein                                                           |
| Eph receptor A4                                                                    |
| proprotein convertase subtilisin/kexin type 4                                      |
| proprotein convertase subtilisin/kexin type 4                                      |
| mannosidase, alpha, class 1B, member 1                                             |
| growth arrest specific 7                                                           |
| TXK tyrosine kinase                                                                |
| receptor (calcitonin) activity modifying protein 1                                 |
| diaphanous homolog 1 (Drosophila)                                                  |
| tubulin, alpha 8                                                                   |
| ankyrin repeat domain 17                                                           |
| glutamate receptor, ionotropic, NMDA1 (zeta 1)                                     |
| glutamate receptor, ionotropic, NMDA1 (zeta 1)                                     |
| glutamate receptor, ionotropic, NMDA1 (zeta 1)                                     |
| endothelial differentiation, G-protein-coupled receptor 6                          |



|                                                                                                                                                                                                                                          |
|------------------------------------------------------------------------------------------------------------------------------------------------------------------------------------------------------------------------------------------|
| mitogen activated protein kinase kinase kinase kinase 1 /// similar to Mitogen-activated protein kinase kinase kinase kinase 1 (MAPK/ERK kinase kinase kinase 1) (MEK kinase kinase 1) (MEKKK 1) (Hematopoietic progenitor kinase) (HPK) |
| E4F transcription factor 1                                                                                                                                                                                                               |
| polymerase (DNA directed), mu                                                                                                                                                                                                            |
| selectin, platelet                                                                                                                                                                                                                       |
| RIKEN cDNA 2600001M11 gene                                                                                                                                                                                                               |
| cDNA sequence BC021442                                                                                                                                                                                                                   |
| RIKEN cDNA 2310040C09 gene                                                                                                                                                                                                               |
| cathepsin E                                                                                                                                                                                                                              |
| ras homolog gene family, member J                                                                                                                                                                                                        |
| GATA binding protein 6                                                                                                                                                                                                                   |
| phosphoinositide-3-kinase, class 3                                                                                                                                                                                                       |
| serine hydroxymethyl transferase 1 (soluble)                                                                                                                                                                                             |
| basic helix-loop-helix domain containing, class B2                                                                                                                                                                                       |
| WD repeat domain 46                                                                                                                                                                                                                      |
| Chloride channel 4-2                                                                                                                                                                                                                     |
| peroxisome biogenesis factor 7                                                                                                                                                                                                           |
| transmembrane 4 superfamily member 5                                                                                                                                                                                                     |
| Transducin (beta)-like 1 X-linked                                                                                                                                                                                                        |
| SEC23A (S. cerevisiae)                                                                                                                                                                                                                   |
| BCL2-antagonist/killer 1                                                                                                                                                                                                                 |
| vacuolar protein sorting 4a (yeast)                                                                                                                                                                                                      |
| myelocytomatosis oncogene                                                                                                                                                                                                                |
| PRP38 pre-mRNA processing factor 38 (yeast) domain containing A                                                                                                                                                                          |
| dedicator of cytokinesis 9 /// similar to Dedicator of cytokinesis protein 9 (Cdc42 guanine nucleotide exchange factor zizimin 1)                                                                                                        |
| ubiquitin-associated protein 2                                                                                                                                                                                                           |
| retinol binding protein 1, cellular                                                                                                                                                                                                      |
| zinc finger protein 644                                                                                                                                                                                                                  |
| solute carrier family 12, member 7                                                                                                                                                                                                       |
| ubinnuclein 1                                                                                                                                                                                                                            |
| limb region 1 like                                                                                                                                                                                                                       |
| Alveolar soft part sarcoma chromosome region, candidate 1 (human)                                                                                                                                                                        |
| ras homolog gene family, member Q                                                                                                                                                                                                        |
| RIKEN cDNA 1700013L23 gene                                                                                                                                                                                                               |
| expressed sequence AW495713                                                                                                                                                                                                              |
| protein S (alpha)                                                                                                                                                                                                                        |
| gap junction membrane channel protein alpha 4                                                                                                                                                                                            |
| midasin homolog (yeast)                                                                                                                                                                                                                  |
| zinc finger protein 467                                                                                                                                                                                                                  |
| centrin 2                                                                                                                                                                                                                                |
| potassium channel tetramerisation domain containing 12                                                                                                                                                                                   |
| RIKEN cDNA 2610528A11 gene                                                                                                                                                                                                               |
| DnaJ (Hsp40) homolog, subfamily C, member 2                                                                                                                                                                                              |
| T-cell leukemia translocation altered gene                                                                                                                                                                                               |
| transcriptional adaptor 1 (HF11 homolog, yeast) like                                                                                                                                                                                     |
| zinc finger, DHHC domain containing 9                                                                                                                                                                                                    |
| microsomal glutathione S-transferase 2                                                                                                                                                                                                   |
| cadherin 13                                                                                                                                                                                                                              |
| transmembrane protein 55A                                                                                                                                                                                                                |
| ADP-ribosylation factor-like 6 interacting protein 2                                                                                                                                                                                     |
| FK506 binding protein 7                                                                                                                                                                                                                  |
| solute carrier family 1 (neuronal/epithelial high affinity glutamate transporter, system Xag), member 1                                                                                                                                  |
| solute carrier family 1 (neuronal/epithelial high affinity glutamate transporter, system Xag), member 1                                                                                                                                  |
| ring finger protein 20                                                                                                                                                                                                                   |

|                                                                                                                                                                                                                                                                                                                                                                                                                                                                                                                                                                                                                                                                                                         |
|---------------------------------------------------------------------------------------------------------------------------------------------------------------------------------------------------------------------------------------------------------------------------------------------------------------------------------------------------------------------------------------------------------------------------------------------------------------------------------------------------------------------------------------------------------------------------------------------------------------------------------------------------------------------------------------------------------|
| interferon gamma inducible protein 47                                                                                                                                                                                                                                                                                                                                                                                                                                                                                                                                                                                                                                                                   |
| peripherin 1 /// similar to peripherin 1                                                                                                                                                                                                                                                                                                                                                                                                                                                                                                                                                                                                                                                                |
| APAF1 interacting protein                                                                                                                                                                                                                                                                                                                                                                                                                                                                                                                                                                                                                                                                               |
| splicing factor, arginine/serine-rich 4 (SRp75)                                                                                                                                                                                                                                                                                                                                                                                                                                                                                                                                                                                                                                                         |
| TNFAIP3 interacting protein 1                                                                                                                                                                                                                                                                                                                                                                                                                                                                                                                                                                                                                                                                           |
| RIKEN cDNA 2310047M15 gene                                                                                                                                                                                                                                                                                                                                                                                                                                                                                                                                                                                                                                                                              |
| ZW10 homolog (Drosophila), centromere/kinetochore protein                                                                                                                                                                                                                                                                                                                                                                                                                                                                                                                                                                                                                                               |
| RNA pseudouridylate synthase domain containing 4                                                                                                                                                                                                                                                                                                                                                                                                                                                                                                                                                                                                                                                        |
| RIKEN cDNA 1200011118 gene                                                                                                                                                                                                                                                                                                                                                                                                                                                                                                                                                                                                                                                                              |
| interferon-related developmental regulator 2                                                                                                                                                                                                                                                                                                                                                                                                                                                                                                                                                                                                                                                            |
| anthrax toxin receptor 2                                                                                                                                                                                                                                                                                                                                                                                                                                                                                                                                                                                                                                                                                |
| cofactor required for Sp1 transcriptional activation, subunit 8                                                                                                                                                                                                                                                                                                                                                                                                                                                                                                                                                                                                                                         |
| agrin                                                                                                                                                                                                                                                                                                                                                                                                                                                                                                                                                                                                                                                                                                   |
| nucleolar protein family A, member 1 (H/ACA small nucleolar RNPs)                                                                                                                                                                                                                                                                                                                                                                                                                                                                                                                                                                                                                                       |
| mitochondrial ribosomal protein S18A                                                                                                                                                                                                                                                                                                                                                                                                                                                                                                                                                                                                                                                                    |
| zinc finger, HIT type 3                                                                                                                                                                                                                                                                                                                                                                                                                                                                                                                                                                                                                                                                                 |
| transmembrane emp24 domain containing 1                                                                                                                                                                                                                                                                                                                                                                                                                                                                                                                                                                                                                                                                 |
| Ferredoxin 1                                                                                                                                                                                                                                                                                                                                                                                                                                                                                                                                                                                                                                                                                            |
| Glutathione S-transferase, alpha 1 (Ya)                                                                                                                                                                                                                                                                                                                                                                                                                                                                                                                                                                                                                                                                 |
| syntaxin 7                                                                                                                                                                                                                                                                                                                                                                                                                                                                                                                                                                                                                                                                                              |
| cysteine and glycine-rich protein 1                                                                                                                                                                                                                                                                                                                                                                                                                                                                                                                                                                                                                                                                     |
| LIM domains containing 1                                                                                                                                                                                                                                                                                                                                                                                                                                                                                                                                                                                                                                                                                |
| RIKEN cDNA 2310057D15 gene                                                                                                                                                                                                                                                                                                                                                                                                                                                                                                                                                                                                                                                                              |
| sin3 associated polypeptide                                                                                                                                                                                                                                                                                                                                                                                                                                                                                                                                                                                                                                                                             |
| geminin                                                                                                                                                                                                                                                                                                                                                                                                                                                                                                                                                                                                                                                                                                 |
| pancreatic lipase-related protein 2                                                                                                                                                                                                                                                                                                                                                                                                                                                                                                                                                                                                                                                                     |
| ribonuclease P/MRP 30 subunit (human)                                                                                                                                                                                                                                                                                                                                                                                                                                                                                                                                                                                                                                                                   |
| replication factor C (activator 1) 3                                                                                                                                                                                                                                                                                                                                                                                                                                                                                                                                                                                                                                                                    |
| signal recognition particle 54                                                                                                                                                                                                                                                                                                                                                                                                                                                                                                                                                                                                                                                                          |
| dopa decarboxylase                                                                                                                                                                                                                                                                                                                                                                                                                                                                                                                                                                                                                                                                                      |
| nitrilase 1                                                                                                                                                                                                                                                                                                                                                                                                                                                                                                                                                                                                                                                                                             |
| metaxin 2                                                                                                                                                                                                                                                                                                                                                                                                                                                                                                                                                                                                                                                                                               |
| retinoic acid induced 12                                                                                                                                                                                                                                                                                                                                                                                                                                                                                                                                                                                                                                                                                |
| protein phosphatase 1, regulatory (inhibitor) subunit 14B                                                                                                                                                                                                                                                                                                                                                                                                                                                                                                                                                                                                                                               |
| WW domain containing adaptor with coiled-coil                                                                                                                                                                                                                                                                                                                                                                                                                                                                                                                                                                                                                                                           |
| Dimethylarginine dimethylaminohydrolase 1                                                                                                                                                                                                                                                                                                                                                                                                                                                                                                                                                                                                                                                               |
| ribosomal protein L36a                                                                                                                                                                                                                                                                                                                                                                                                                                                                                                                                                                                                                                                                                  |
| ADP-ribosylation factor 4                                                                                                                                                                                                                                                                                                                                                                                                                                                                                                                                                                                                                                                                               |
| similar to Lipoprotein lipase precursor (LPL)                                                                                                                                                                                                                                                                                                                                                                                                                                                                                                                                                                                                                                                           |
| similar to Ornithine decarboxylase (ODC) /// similar to Ornithine decarboxylase (ODC)                                                                                                                                                                                                                                                                                                                                                                                                                                                                                                                                                                                                                   |
| thiosulfate sulfurtransferase, mitochondrial                                                                                                                                                                                                                                                                                                                                                                                                                                                                                                                                                                                                                                                            |
| integrin alpha 7                                                                                                                                                                                                                                                                                                                                                                                                                                                                                                                                                                                                                                                                                        |
| prolactin regulatory element binding                                                                                                                                                                                                                                                                                                                                                                                                                                                                                                                                                                                                                                                                    |
| flavin containing monooxygenase 5                                                                                                                                                                                                                                                                                                                                                                                                                                                                                                                                                                                                                                                                       |
| lysosomal membrane glycoprotein 1                                                                                                                                                                                                                                                                                                                                                                                                                                                                                                                                                                                                                                                                       |
| aldolase 1, A isoform                                                                                                                                                                                                                                                                                                                                                                                                                                                                                                                                                                                                                                                                                   |
| phosphoglycerate mutase 1 /// similar to Phosphoglycerate mutase 1 (Phosphoglycerate mutase isozyme B) (PGAM-B) (BPG-dependent PGAM 1) /// similar to Phosphoglycerate mutase 1 (Phosphoglycerate mutase isozyme B) (PGAM-B) (BPG-dependent PGAM 1) /// similar to Phosphoglycerate mutase 1 (Phosphoglycerate mutase isozyme B) (PGAM-B) (BPG-dependent PGAM 1) /// similar to Phosphoglycerate mutase 1 (Phosphoglycerate mutase isozyme B) (PGAM-B) (BPG-dependent PGAM 1) /// similar to Phosphoglycerate mutase 1 (Phosphoglycerate mutase isozyme B) (PGAM-B) (BPG-dependent PGAM 1) /// similar to Phosphoglycerate mutase 1 (Phosphoglycerate mutase isozyme B) (PGAM-B) (BPG-dependent PGAM 1) |
| interferon-related developmental regulator 1                                                                                                                                                                                                                                                                                                                                                                                                                                                                                                                                                                                                                                                            |
| thymocyte nuclear protein 1                                                                                                                                                                                                                                                                                                                                                                                                                                                                                                                                                                                                                                                                             |
| actin related protein 2/3 complex, subunit 4                                                                                                                                                                                                                                                                                                                                                                                                                                                                                                                                                                                                                                                            |
| lysyl oxidase                                                                                                                                                                                                                                                                                                                                                                                                                                                                                                                                                                                                                                                                                           |

|                                                                                        |
|----------------------------------------------------------------------------------------|
| speckle-type POZ protein                                                               |
| neuroendocrine secretory protein antisense                                             |
| Fas-associated factor 1                                                                |
| lectin, galactose binding, soluble 4                                                   |
| EF hand domain containing 2                                                            |
| heme oxygenase (decycling) 1                                                           |
| chaperonin subunit 8 (theta)                                                           |
| membrane-associated ring finger (C3HC4) 7                                              |
| hydroxy-delta-5-steroid dehydrogenase, 3 beta- and steroid delta-isomerase 7           |
| phosphatidylinositol glycan, class K                                                   |
| capping protein (actin filament), gelsolin-like                                        |
| hypoxanthine guanine phosphoribosyl transferase 1                                      |
| nuclear protein 1                                                                      |
| SRY-box containing gene 4 /// similar to Transcription factor SOX-4                    |
| WW domain containing E3 ubiquitin protein ligase 2                                     |
| eukaryotic translation initiation factor 1A, Y-linked                                  |
| chromatin modifying protein 2B                                                         |
| BRCA1 associated protein                                                               |
| guanosine diphosphate (GDP) dissociation inhibitor 2                                   |
| thioredoxin-like 1                                                                     |
| tissue inhibitor of metalloproteinase 2                                                |
| thyrotroph embryonic factor                                                            |
| matrix metalloproteinase 14 (membrane-inserted)                                        |
| cysteine-rich with EGF-like domains 2                                                  |
| phospholipase A2, group IB, pancreas                                                   |
| galactokinase 2                                                                        |
| asparaginase like 1                                                                    |
| phosphohistidine phosphatase 1                                                         |
| ATPase, H+ transporting, lysosomal V1 subunit C1                                       |
| DNA segment, Chr 11, ERATO Doi 497, expressed                                          |
| mitogen-activated protein kinase kinase 1 interacting protein 1                        |
| cyclin G1                                                                              |
| propionyl Coenzyme A carboxylase, beta polypeptide                                     |
| eukaryotic translation elongation factor 1 delta (guanine nucleotide exchange protein) |
| WD repeat domain 26                                                                    |
| angiomotin like 2                                                                      |
| colipase, pancreatic                                                                   |
| latent transforming growth factor beta binding protein 3                               |
| adiponectin receptor 1                                                                 |
| nitrilase family, member 2                                                             |
| translocation protein 1                                                                |
| UDP-GlcNAc:betaGal beta-1,3-N-acetylglucosaminyltransferase 2                          |
| Max interacting protein 1                                                              |
| heat shock protein 8                                                                   |
| tubulin-specific chaperone e                                                           |
| splicing factor, arginine/serine-rich 1 (ASF/SF2)                                      |
| tumor suppressor candidate 2                                                           |
| synaptonemal complex protein 3                                                         |
| DnaJ (Hsp40) homolog, subfamily C, member 10                                           |
| RIKEN cDNA 1810010M01 gene                                                             |
| polymerase (RNA) II (DNA directed) polypeptide C                                       |
| H1 histone family, member O, oocyte-specific                                           |
| Protein arginine N-methyltransferase 5                                                 |

|                                                                                                                                                             |
|-------------------------------------------------------------------------------------------------------------------------------------------------------------|
| RAB10, member RAS oncogene family                                                                                                                           |
| calponin 3, acidic                                                                                                                                          |
| ERGIC and golgi 2                                                                                                                                           |
| protease (prosome, macropain) 26S subunit, ATPase 1                                                                                                         |
| DnaJ (Hsp40) homolog, subfamily C, member 7                                                                                                                 |
| processing of precursor 4, ribonuclease P/MRP family, (S. cerevisiae)                                                                                       |
| expressed sequence C86187                                                                                                                                   |
| RIKEN cDNA 0910001A06 gene                                                                                                                                  |
| makorin, ring finger protein, 2                                                                                                                             |
| glypican 3                                                                                                                                                  |
| cyclin B1, related sequence 1 /// cyclin B1                                                                                                                 |
| death effector domain-containing                                                                                                                            |
| gene trap ROSA b-geo 22                                                                                                                                     |
| transgelin 2                                                                                                                                                |
| RIKEN cDNA 2210010A19 gene                                                                                                                                  |
| ubiquitin-conjugating enzyme E2 variant 1 /// similar to ubiquitin-conjugating enzyme E2 variant 1 /// similar to ubiquitin-conjugating enzyme E2 variant 1 |
| ubiquitin-conjugating enzyme E2M (UBC12 homolog, yeast)                                                                                                     |
| RIKEN cDNA 2810409H07 gene                                                                                                                                  |
| nucleoporin 62                                                                                                                                              |
| F-box only protein 3                                                                                                                                        |
| phospholipase A2, activating protein                                                                                                                        |
| stathmin-like 3                                                                                                                                             |
| acyl-CoA thioesterase 9                                                                                                                                     |
| GTL2, imprinted maternally expressed untranslated mRNA                                                                                                      |
| GTL2, imprinted maternally expressed untranslated mRNA                                                                                                      |
| XPA binding protein 2                                                                                                                                       |
| creatine kinase, muscle                                                                                                                                     |
| histone cell cycle regulation defective interacting protein 5                                                                                               |
| smu-1 suppressor of mec-8 and unc-52 homolog (C. elegans)                                                                                                   |
| ---                                                                                                                                                         |
| transmembrane protein 30A                                                                                                                                   |
| calnexin                                                                                                                                                    |
| synaptophysin                                                                                                                                               |
| splicing factor, arginine/serine-rich 6                                                                                                                     |
| transmembrane emp24 protein transport domain containing 7                                                                                                   |
| RIKEN cDNA 1200007D18 gene                                                                                                                                  |
| transgelin 3                                                                                                                                                |
| RIKEN cDNA C030004A17 gene                                                                                                                                  |
| platelet-activating factor acetylhydrolase, isoform 1b, alpha2 subunit                                                                                      |
| nudix (nucleoside diphosphate linked moiety X)-type motif 4                                                                                                 |
| nudix (nucleoside diphosphate linked moiety X)-type motif 4                                                                                                 |
| synaptotagmin IV                                                                                                                                            |
| N-acetyltransferase 11                                                                                                                                      |
| RNA binding motif protein, X chromosome retrogene                                                                                                           |
| ORM1-like 2 (S. cerevisiae)                                                                                                                                 |
| glutaryl-Coenzyme A dehydrogenase                                                                                                                           |
| RIKEN cDNA 1200013P24 gene                                                                                                                                  |
| stromal membrane-associated protein 1                                                                                                                       |
| pyrroline-5-carboxylate reductase-like                                                                                                                      |
| Kelch-like 9 (Drosophila)                                                                                                                                   |
| heterogeneous nuclear ribonucleoprotein C /// similar to heterogeneous nuclear ribonucleoprotein C /// similar to heterogeneous nuclear ribonucleoprotein C |
| RIKEN cDNA 3230401D17 gene                                                                                                                                  |
| solute carrier family 33 (acetyl-CoA transporter), member 1                                                                                                 |

|                                                                                                               |
|---------------------------------------------------------------------------------------------------------------|
| ATPase, H+ transporting, lysosomal accessory protein 2                                                        |
| DnaJ (Hsp40) homolog, subfamily C, member 9                                                                   |
| proline-rich polypeptide 6                                                                                    |
| ring finger protein 11                                                                                        |
| regulator of chromosome condensation 2                                                                        |
| ATP citrate lyase                                                                                             |
| splicing factor 3b, subunit 3                                                                                 |
| ring finger protein 44                                                                                        |
| RIKEN cDNA 4930539H15 gene                                                                                    |
| Yip1 domain family, member 3                                                                                  |
| tetratricopeptide repeat domain 4                                                                             |
| regenerating islet-derived 1                                                                                  |
| LanC (bacterial lantibiotic synthetase component C)-like 2                                                    |
| amino-terminal enhancer of split                                                                              |
| oocyte specific homeobox 1 /// similar to oocyte specific homeobox 2                                          |
| RIKEN cDNA 2310001A20 gene                                                                                    |
| RIKEN cDNA 2310056P07 gene                                                                                    |
| meiosis expressed gene 1                                                                                      |
| zinc finger protein 110                                                                                       |
| lectin, galactose-binding, soluble 2                                                                          |
| Leucine zipper-EF-hand containing transmembrane protein 1                                                     |
| RIKEN cDNA 2610511O17 gene                                                                                    |
| Solute carrier family 35, member A4                                                                           |
| general transcription factor IIB                                                                              |
| G elongation factor, mitochondrial 1                                                                          |
| bystin-like                                                                                                   |
| claudin domain containing 1                                                                                   |
| oxysterol binding protein-like 9                                                                              |
| cytochrome c oxidase, subunit XVII assembly protein homolog (yeast)                                           |
| phenylalanine-tRNA synthetase-like, alpha subunit                                                             |
| ST6 (alpha-N-acetyl-neuraminy1-2,3-beta-galactosyl-1,3)-N-acetylgalactosaminide alpha-2,6-sialyltransferase 4 |
| adenylate kinase 3                                                                                            |
| ubiquitin specific peptdiase 1                                                                                |
| transmembrane protein 147                                                                                     |
| RIKEN cDNA 9630044O09 gene                                                                                    |
| NADH dehydrogenase (ubiquinone) 1 alpha subcomplex, 6 (B14)                                                   |
| cytokine induced apoptosis inhibitor 1                                                                        |
| proteasome (prosome, macropain) 26S subunit, non-ATPase, 6                                                    |
| RIKEN cDNA 1110003E01 gene                                                                                    |
| a disintegrin and metallopeptidase domain 17                                                                  |
| folliculin                                                                                                    |
| myosin, heavy polypeptide 8, skeletal muscle, perinatal                                                       |
| feminization 1 homolog a (C. elegans)                                                                         |
| RIKEN cDNA 1110034O07 gene                                                                                    |
| tumor necrosis factor, alpha-induced protein 8                                                                |
| ubiquitin-conjugating enzyme E2 variant 2                                                                     |
| far upstream element (FUSE) binding protein 1                                                                 |
| tumor protein D52                                                                                             |
| ---                                                                                                           |
| RIKEN cDNA 2610312B22 gene                                                                                    |
| clathrin, heavy polypeptide (Hc)                                                                              |
| interferon induced transmembrane protein 3                                                                    |
| interferon induced transmembrane protein 1                                                                    |

|                                                                                                                                                     |
|-----------------------------------------------------------------------------------------------------------------------------------------------------|
| AHNAK nucleoprotein (desmoyokin)                                                                                                                    |
| translocase of outer mitochondrial membrane 7 homolog (yeast)                                                                                       |
| FK506 binding protein 1a                                                                                                                            |
| mitochondria-associated protein involved in granulocyte-macrophage colony-stimulating factor signal transduction                                    |
| tripartite motif-containing 61                                                                                                                      |
| THO complex 7 homolog (Drosophila)                                                                                                                  |
| large tumor suppressor 2                                                                                                                            |
| mitochondrial carrier homolog 2 (C. elegans)                                                                                                        |
| Nedd4 family interacting protein 2                                                                                                                  |
| Purkinje cell protein 4-like 1                                                                                                                      |
| eukaryotic translation initiation factor 5                                                                                                          |
| brix domain containing 2                                                                                                                            |
| transmembrane protein 93                                                                                                                            |
| phosducin-like 3                                                                                                                                    |
| growth factor, erv1 (S. cerevisiae)-like (augmenter of liver regeneration)                                                                          |
| lectin, mannose-binding, 1                                                                                                                          |
| RIKEN cDNA 0610007C21 gene                                                                                                                          |
| chromobox homolog 3 (Drosophila HP1 gamma) /// similar to chromobox homolog 3 /// similar to chromobox homolog 3 /// similar to chromobox homolog 3 |
| zinc finger protein 36, C3H type-like 2                                                                                                             |
| keratin complex 1, acidic, gene 4                                                                                                                   |
| selenoprotein X 1                                                                                                                                   |
| CD97 antigen                                                                                                                                        |
| syntaxin 12                                                                                                                                         |
| RIKEN cDNA 2810428I15 gene                                                                                                                          |
| deoxynucleotidyltransferase, terminal, interacting protein 2                                                                                        |
| caveolin, caveolae protein 1                                                                                                                        |
| LSM14 homolog A (SCD6, S. cerevisiae)                                                                                                               |
| RIKEN cDNA 4931406I20 gene                                                                                                                          |
| ribosomal L1 domain containing 1                                                                                                                    |
| NADH dehydrogenase (ubiquinone) 1 alpha subcomplex 10                                                                                               |
| DEAH (Asp-Glu-Ala-His) box polypeptide 40                                                                                                           |
| DEK oncogene (DNA binding)                                                                                                                          |
| microtubule-associated protein 1 light chain 3 beta                                                                                                 |
| microtubule-associated protein 1 light chain 3 beta                                                                                                 |
| dihydrolipoamide S-succinyltransferase (E2 component of 2-oxo-glutarate complex)                                                                    |
| insulin degrading enzyme                                                                                                                            |
| Sec61 alpha 1 subunit (S. cerevisiae)                                                                                                               |
| endothelial cell growth factor 1 (platelet-derived)                                                                                                 |
| WD repeat domain 61                                                                                                                                 |
| small nuclear RNA activating complex, polypeptide 2                                                                                                 |
| solute carrier family 25 (mitochondrial carrier oxoglutarate carrier), member 11                                                                    |
| WD repeat and SOCS box-containing 2                                                                                                                 |
| coiled-coil domain containing 58                                                                                                                    |
| coiled-coil domain containing 80                                                                                                                    |
| RWD domain containing 1                                                                                                                             |
| trefoil factor 1                                                                                                                                    |
| RIO kinase 3 (yeast)                                                                                                                                |
| RIKEN cDNA 1200003C05 gene                                                                                                                          |
| acyl-Coenzyme A dehydrogenase family, member 9                                                                                                      |
| Proteasome (prosome, macropain) 26S subunit, non-ATPase, 11                                                                                         |
| proteasome (prosome, macropain) 26S subunit, non-ATPase, 11                                                                                         |
| thyroid hormone responsive SPOT14 homolog (Rattus)                                                                                                  |
| phosphatidylinositol 4-kinase type 2 alpha                                                                                                          |

|                                                                               |
|-------------------------------------------------------------------------------|
| moesin                                                                        |
| mitogen-activated protein kinase kinase kinase 7 interacting protein 2        |
| DNA segment, Chr 19, Brigham & Women's Genetics 1357 expressed                |
| plexin B2                                                                     |
| CKLF-like MARVEL transmembrane domain containing 6                            |
| RIKEN cDNA A730098D12 gene                                                    |
| pyrophosphatase (inorganic) 1                                                 |
| RIKEN cDNA 2310005N03 gene /// expressed sequence AI503316                    |
| Heterogeneous nuclear ribonucleoprotein U                                     |
| RAB34, member of RAS oncogene family                                          |
| STIP1 homology and U-Box containing protein 1                                 |
| SPARC-like 1 (mast9, hevin)                                                   |
| sorbin and SH3 domain containing 1                                            |
| zinc finger, A20 domain containing 2                                          |
| transmembrane and coiled-coil domains 1                                       |
| steroid receptor RNA activator 1                                              |
| replication protein A3                                                        |
| carnitine deficiency-associated gene expressed in ventricle 3                 |
| carnitine deficiency-associated gene expressed in ventricle 3                 |
| dynactin 6                                                                    |
| protease, serine, 15                                                          |
| RIKEN cDNA 1110049F12 gene                                                    |
| cysteine and histidine-rich domain (CHORD)-containing, zinc-binding protein 1 |
| Vzinc finger and BTB domain containing 7B                                     |
| Platelet derived growth factor receptor, alpha polypeptide                    |
| RIKEN cDNA 1110008F13 gene                                                    |
| transmembrane protein 134                                                     |
| glutamate-cysteine ligase , modifier subunit                                  |
| isoprenylcysteine carboxyl methyltransferase                                  |
| myo-inositol 1-phosphate synthase A1                                          |
| ankyrin repeat domain 13a                                                     |
| pyrroline-5-carboxylate reductase family, member 2                            |
| DNA segment, Chr 8, ERATO Doi 738, expressed                                  |
| JTV1 gene                                                                     |
| NADH dehydrogenase (ubiquinone) 1 beta subcomplex, 2                          |
| signal recognition particle 19                                                |
| Niemann Pick type C2                                                          |
| mitochondrial ribosomal protein L34                                           |
| DALR anticodon binding domain containing 3                                    |
| DNA segment, Chr 15, ERATO Doi 785, expressed                                 |
| RAN binding protein 3                                                         |
| CNDP dipeptidase 2 (metallopeptidase M20 family)                              |
| glutathione transferase zeta 1 (maleylacetoacetate isomerase)                 |
| arginyl aminopeptidase (aminopeptidase B)                                     |
| poly(rC) binding protein 4                                                    |
| MAP kinase-activated protein kinase 2                                         |
| LIM domain binding 3                                                          |
| MYC-associated zinc finger protein (purine-binding transcription factor)      |
| cytidylate kinase                                                             |
| deleted in azoospermia-like                                                   |
| CD34 antigen                                                                  |
| RIKEN cDNA 1190002H23 gene                                                    |
| selenoprotein                                                                 |

|                                                                              |
|------------------------------------------------------------------------------|
| trafficking protein particle complex 4                                       |
| methionine adenosyltransferase II, alpha                                     |
| vacuolar protein sorting 72 (yeast)                                          |
| splicing factor, arginine/serine-rich 10 (transformer 2 homolog, Drosophila) |
| eukaryotic translation initiation factor 2, subunit 2 (beta)                 |
| cDNA sequence BC031181                                                       |
| PDZ and LIM domain 7                                                         |
| splicing factor, arginine/serine-rich 7                                      |
| 24-dehydrocholesterol reductase                                              |
| developmental pluripotency associated 5                                      |
| ADP-ribosylation factor-like 6 interacting protein 1                         |
| serine/threonine kinase 11                                                   |
| serum deprivation response                                                   |
| polypyrimidine tract binding protein 2                                       |
| carbonic anhydrase 3                                                         |
| tumor protein p53 inducible nuclear protein 2                                |
| TAR DNA binding protein                                                      |
| transmembrane protein 109                                                    |
| erythrocyte protein band 4.1                                                 |
| beclin 1 (coiled-coil, myosin-like BCL2-interacting protein)                 |
| mitochondrial ribosomal protein L50                                          |
| RIKEN cDNA 1110014J01 gene                                                   |
| cytochrome c oxidase subunit VIIa polypeptide 2-like                         |
| HLA-B-associated transcript 1A                                               |
| glycine cleavage system protein H (aminomethyl carrier)                      |
| RIKEN cDNA C130052I12 gene                                                   |
| CD302 antigen                                                                |
| sterol-C4-methyl oxidase-like                                                |
| ribosomal protein S27-like                                                   |
| stromal cell derived factor 4                                                |
| fatty acid desaturase 1                                                      |
| RIKEN cDNA B430110G05 gene                                                   |
| ethanolamine kinase 1                                                        |
| tetratricopeptide repeat domain 15                                           |
| NudC domain containing 2                                                     |
| longevity assurance homolog 2 (S. cerevisiae)                                |
| IK cytokine                                                                  |
| nucleolar protein 7                                                          |
| H2A histone family, member Y                                                 |
| RIKEN cDNA 2810422B04 gene                                                   |
| CCR4-NOT transcription complex, subunit 7                                    |
| transcription elongation factor B (SIII), polypeptide 2                      |
| selenoprotein K                                                              |
| histone H1-like protein in spermatids 1                                      |
| deoxyhypusine synthase                                                       |
| cathepsin K                                                                  |
| ARP1 actin-related protein 1 homolog A (yeast)                               |
| G-protein signalling modulator 1 (AGS3-like, C. elegans)                     |
| phosphatidylinositol transfer protein, alpha                                 |
| vacuolar protein sorting 16 (yeast)                                          |
| ---                                                                          |
| programmed cell death 2                                                      |
| neuron specific gene family member 2                                         |



|                                                                                                                                                                                                      |
|------------------------------------------------------------------------------------------------------------------------------------------------------------------------------------------------------|
| RIKEN cDNA 1810073N04 gene                                                                                                                                                                           |
| claudin 1                                                                                                                                                                                            |
| FK506 binding protein 3                                                                                                                                                                              |
| kinesin family member 5B                                                                                                                                                                             |
| chloride channel CLIC-like 1                                                                                                                                                                         |
| Phosphoglycerate dehydrogenase like 1                                                                                                                                                                |
| tubulin, alpha 3                                                                                                                                                                                     |
| chymotrypsinogen B1                                                                                                                                                                                  |
| RuvB-like protein 2                                                                                                                                                                                  |
| mitochondrial ribosomal protein S2                                                                                                                                                                   |
| farnesyl diphosphate synthetase /// similar to farnesyl diphosphate synthetase                                                                                                                       |
| MTERF domain containing 1                                                                                                                                                                            |
| RNA polymerase 1-1                                                                                                                                                                                   |
| KRR1, small subunit (SSU) processome component, homolog (yeast)                                                                                                                                      |
| succinate-Coenzyme A ligase, GDP-forming, beta subunit                                                                                                                                               |
| NTF2-related export protein 1                                                                                                                                                                        |
| catenin (cadherin associated protein), beta 1                                                                                                                                                        |
| mitochondrial ribosomal protein L12                                                                                                                                                                  |
| U2 small nuclear RNA auxiliary factor 1-like 4                                                                                                                                                       |
| RIKEN cDNA 3110002H16 gene                                                                                                                                                                           |
| TMEM9 domain family, member B                                                                                                                                                                        |
| Cd99 antigen-like 2                                                                                                                                                                                  |
| sulfatase 2                                                                                                                                                                                          |
| thioredoxin reductase 2                                                                                                                                                                              |
| cytochrome c oxidase, subunit Va                                                                                                                                                                     |
| polymerase (DNA directed), gamma                                                                                                                                                                     |
| MAD homolog 4 (Drosophila)                                                                                                                                                                           |
| CEA-related cell adhesion molecule 11                                                                                                                                                                |
| chaperonin subunit 2 (beta)                                                                                                                                                                          |
| chorionic somatomammotropin hormone 2                                                                                                                                                                |
| phosphatidylinositol glycan, class X                                                                                                                                                                 |
| zinc finger, BED domain containing 3                                                                                                                                                                 |
| cDNA sequence U46068                                                                                                                                                                                 |
| hippocampus abundant gene transcript 1                                                                                                                                                               |
| programmed cell death 2-like                                                                                                                                                                         |
| down-regulator of transcription 1                                                                                                                                                                    |
| ---                                                                                                                                                                                                  |
| eukaryotic translation termination factor 1                                                                                                                                                          |
| deoxyribonuclease I                                                                                                                                                                                  |
| receptor-like tyrosine kinase                                                                                                                                                                        |
| ubiquitin-conjugating enzyme E2Z (putative)                                                                                                                                                          |
| ZW10 interactor                                                                                                                                                                                      |
| peptidyl prolyl isomerase H /// similar to peptidyl prolyl isomerase H /// similar to peptidylprolyl isomerase H /// similar to peptidylprolyl isomerase H /// similar to peptidylprolyl isomerase H |
| Morf4 family associated protein 1                                                                                                                                                                    |
| melanoma cell adhesion molecule                                                                                                                                                                      |
| chaperonin subunit 6a (zeta)                                                                                                                                                                         |
| homeo box D8                                                                                                                                                                                         |
| tubulin, beta 6                                                                                                                                                                                      |
| tubulin, beta 3                                                                                                                                                                                      |
| myeloid differentiation primary response gene 116                                                                                                                                                    |
| N-myc downstream regulated-like                                                                                                                                                                      |
| Transcribed locus                                                                                                                                                                                    |
| RAE1 RNA export 1 homolog (S. pombe)                                                                                                                                                                 |

|                                                                                                                    |
|--------------------------------------------------------------------------------------------------------------------|
| ornithine decarboxylase antizyme 3                                                                                 |
| myotrophin                                                                                                         |
| thrombospondin 1 /// similar to thrombospondin 1                                                                   |
| mitochondrial ribosomal protein S5                                                                                 |
| stem-loop binding protein                                                                                          |
| transmembrane protein with EGF-like and two follistatin-like domains 1                                             |
| expressed in non-metastatic cells 4, protein                                                                       |
| ribonuclease P 14 subunit (human)                                                                                  |
| Yip1 domain family, member 4                                                                                       |
| ribosomal protein L18 /// similar to 60S ribosomal protein L18                                                     |
| NADH dehydrogenase (ubiquinone) 1 alpha subcomplex, 4                                                              |
| Ribosomal protein L32                                                                                              |
| catalase                                                                                                           |
| protein tyrosine phosphatase, receptor type, S                                                                     |
| phosphoenolpyruvate carboxykinase 1, cytosolic                                                                     |
| acetyl-Coenzyme A acyltransferase 1A                                                                               |
| transcription factor 4                                                                                             |
| reticulon 4                                                                                                        |
| tyrosine 3-monooxygenase/tryptophan 5-monooxygenase activation protein, epsilon polypeptide                        |
| coiled coil domain containing 28B                                                                                  |
| myosin, light polypeptide 4                                                                                        |
| mutS homolog 3 (E. coli)                                                                                           |
| tumor necrosis factor, alpha-induced protein 2                                                                     |
| differentially expressed in FDCP 8                                                                                 |
| ---                                                                                                                |
| DEAD (Asp-Glu-Ala-Asp) box polypeptide 18                                                                          |
| Cd63 antigen                                                                                                       |
| endonuclease G                                                                                                     |
| aryl-hydrocarbon receptor                                                                                          |
| similar to DNA replication licensing factor MCM3 (DNA polymerase alpha holoenzyme-associated protein P1) (P1-MCM3) |
| RIKEN cDNA 1810059G22 gene                                                                                         |
| LIM domain binding 1                                                                                               |
| heat shock protein 90kDa beta (Grp94), member 1                                                                    |
| ATPase, Na+/K+ transporting, beta 1 polypeptide                                                                    |
| kinesin family member 20A                                                                                          |
| cellular repressor of E1A-stimulated genes 1                                                                       |
| fibrillarin                                                                                                        |
| CEA-related cell adhesion molecule 12                                                                              |
| RIKEN cDNA 4922502D21 gene                                                                                         |
| ropporin 1-like                                                                                                    |
| RIKEN cDNA 0610013E23 gene                                                                                         |
| prostate stem cell antigen                                                                                         |
| chitinase, acidic                                                                                                  |
| keratin complex 1, acidic, gene 13                                                                                 |
| chemokine (C-X-C motif) ligand 12                                                                                  |
| cDNA sequence BC017643                                                                                             |
| RIKEN cDNA 2210016F16 gene                                                                                         |
| retinitis pigmentosa 9 homolog (human)                                                                             |
| poly(A)-specific ribonuclease (deadenylation nuclease)                                                             |
| glucosidase, alpha, acid                                                                                           |
| lamin B1                                                                                                           |
| RER1 retention in endoplasmic reticulum 1 homolog (S. cerevisiae)                                                  |
| tissue inhibitor of metalloproteinase 3                                                                            |

|                                                                                                                                                                                                                                                                                                        |
|--------------------------------------------------------------------------------------------------------------------------------------------------------------------------------------------------------------------------------------------------------------------------------------------------------|
| yes-associated protein 1                                                                                                                                                                                                                                                                               |
| LTV1 homolog (S. cerevisiae)                                                                                                                                                                                                                                                                           |
| DNA segment, human D4S114                                                                                                                                                                                                                                                                              |
| macrophage activation 2 /// macrophage activation 2 like /// similar to macrophage activation 2 /// similar to macrophage activation 2 like /// similar to macrophage activation 2 /// similar to guanylate binding protein family, member 6 /// similar to guanylate binding protein family, member 6 |
| RAB3A, member RAS oncogene family                                                                                                                                                                                                                                                                      |
| prolactin-like protein K                                                                                                                                                                                                                                                                               |
| cAMP responsive element modulator                                                                                                                                                                                                                                                                      |
| insulin-like growth factor binding protein 7 /// similar to O-acyltransferase (membrane bound) domain containing 2                                                                                                                                                                                     |
| protamine 2                                                                                                                                                                                                                                                                                            |
| voltage-dependent anion channel 2                                                                                                                                                                                                                                                                      |
| growth hormone inducible transmembrane protein                                                                                                                                                                                                                                                         |
| EMG1 nucleolar protein homolog (S. cerevisiae)                                                                                                                                                                                                                                                         |
| tropomyosin 1, alpha                                                                                                                                                                                                                                                                                   |
| transition protein 1                                                                                                                                                                                                                                                                                   |
| protease (prosome, macropain) 26S subunit, ATPase 5                                                                                                                                                                                                                                                    |
| nuclear factor, erythroid derived 2,-like 1                                                                                                                                                                                                                                                            |
| Harvey rat sarcoma virus oncogene 1                                                                                                                                                                                                                                                                    |
| sulfotransferase family 1D, member 1                                                                                                                                                                                                                                                                   |
| cyclin-dependent kinase 4 /// similar to Cell division protein kinase 4 (Cyclin-dependent kinase 4) (PSK-J3) (CRK3)                                                                                                                                                                                    |
| splicing factor, arginine/serine-rich 1 (ASF/SF2)                                                                                                                                                                                                                                                      |
| Bcl2-associated athanogene 1                                                                                                                                                                                                                                                                           |
| Eukaryotic translation initiation factor 3, subunit 5 (epsilon)                                                                                                                                                                                                                                        |
| cleavage and polyadenylation specific factor 2                                                                                                                                                                                                                                                         |
| sorting nexin 3                                                                                                                                                                                                                                                                                        |
| fatty acid binding protein 5, epidermal                                                                                                                                                                                                                                                                |
| cyclin D3                                                                                                                                                                                                                                                                                              |
| aldolase 3, C isoform                                                                                                                                                                                                                                                                                  |
| thioredoxin interacting protein                                                                                                                                                                                                                                                                        |
| Thioredoxin interacting protein                                                                                                                                                                                                                                                                        |
| TPA regulated locus                                                                                                                                                                                                                                                                                    |
| mago-nashi homolog, proliferation-associated (Drosophila)                                                                                                                                                                                                                                              |
| voltage-dependent anion channel 3                                                                                                                                                                                                                                                                      |
| adaptor protein complex AP-1, sigma 1                                                                                                                                                                                                                                                                  |
| lymphocyte antigen 6 complex, locus D                                                                                                                                                                                                                                                                  |
| eukaryotic translation initiation factor 3, subunit 6                                                                                                                                                                                                                                                  |
| small nuclear ribonucleoprotein B                                                                                                                                                                                                                                                                      |
| RIKEN cDNA 1810020G14 gene                                                                                                                                                                                                                                                                             |
| tumor-suppressing subchromosomal transferable fragment 4                                                                                                                                                                                                                                               |
| thymoma viral proto-oncogene 2                                                                                                                                                                                                                                                                         |
| proteasome (prosome, macropain) subunit, beta type 5                                                                                                                                                                                                                                                   |
| Hemoglobin, beta adult major chain                                                                                                                                                                                                                                                                     |
| midkine                                                                                                                                                                                                                                                                                                |
| chaperonin subunit 7 (eta)                                                                                                                                                                                                                                                                             |
| small EDRK-rich factor 2                                                                                                                                                                                                                                                                               |
| lipocalin 2                                                                                                                                                                                                                                                                                            |
| creatine kinase, mitochondrial 1, ubiquitous                                                                                                                                                                                                                                                           |
| protease, serine, 8 (prostasin)                                                                                                                                                                                                                                                                        |
| growth differentiation factor 9                                                                                                                                                                                                                                                                        |
| enolase 1, alpha non-neuron /// similar to enolase 1, alpha non-neuron /// similar to T21B10.2b                                                                                                                                                                                                        |
| RIKEN cDNA 2310008M10 gene                                                                                                                                                                                                                                                                             |
| actinin alpha 2                                                                                                                                                                                                                                                                                        |
| isocitrate dehydrogenase 1 (NADP+), soluble                                                                                                                                                                                                                                                            |
| DEAH (Asp-Glu-Ala-His) box polypeptide 15                                                                                                                                                                                                                                                              |

|                                                                                                                                                                                                                                                                                                                                                                                                      |
|------------------------------------------------------------------------------------------------------------------------------------------------------------------------------------------------------------------------------------------------------------------------------------------------------------------------------------------------------------------------------------------------------|
| holocytochrome c synthetase                                                                                                                                                                                                                                                                                                                                                                          |
| expressed sequence 2 embryonic lethal                                                                                                                                                                                                                                                                                                                                                                |
| CGG triplet repeat binding protein 1                                                                                                                                                                                                                                                                                                                                                                 |
| CTD (carboxy-terminal domain, RNA polymerase II, polypeptide A) phosphatase, subunit 1                                                                                                                                                                                                                                                                                                               |
| ATPase, class II, type 9A                                                                                                                                                                                                                                                                                                                                                                            |
| 3-phosphoinositide dependent protein kinase-1                                                                                                                                                                                                                                                                                                                                                        |
| mannosidase 1, alpha                                                                                                                                                                                                                                                                                                                                                                                 |
| mannosidase 1, alpha                                                                                                                                                                                                                                                                                                                                                                                 |
| autophagy-related 16-like 1 (yeast)                                                                                                                                                                                                                                                                                                                                                                  |
| myosin binding protein C, cardiac                                                                                                                                                                                                                                                                                                                                                                    |
| extra cellular link domain-containing 1                                                                                                                                                                                                                                                                                                                                                              |
| Ras suppressor protein 1                                                                                                                                                                                                                                                                                                                                                                             |
| brix domain containing 1                                                                                                                                                                                                                                                                                                                                                                             |
| trichohyalin                                                                                                                                                                                                                                                                                                                                                                                         |
| tumor suppressing subtransferable candidate 1                                                                                                                                                                                                                                                                                                                                                        |
| zinc finger protein 131                                                                                                                                                                                                                                                                                                                                                                              |
| peptidyl-prolyl isomerase G (cyclophilin G)                                                                                                                                                                                                                                                                                                                                                          |
| catechol-O-methyltransferase domain containing 1                                                                                                                                                                                                                                                                                                                                                     |
| Suppression of tumorigenicity 7                                                                                                                                                                                                                                                                                                                                                                      |
| transmembrane channel-like gene family 6                                                                                                                                                                                                                                                                                                                                                             |
| sorting nexin 9                                                                                                                                                                                                                                                                                                                                                                                      |
| procollagen, type XVII, alpha 1                                                                                                                                                                                                                                                                                                                                                                      |
| DNA segment, Chr 15, ERATO Doi 682, expressed                                                                                                                                                                                                                                                                                                                                                        |
| mediator of RNA polymerase II transcription, subunit 11 homolog (S. cerevisiae)                                                                                                                                                                                                                                                                                                                      |
| DNA segment, Chr 1, ERATO Doi 622, expressed                                                                                                                                                                                                                                                                                                                                                         |
| RIKEN cDNA A230106M15 gene                                                                                                                                                                                                                                                                                                                                                                           |
| testis specific gene A2                                                                                                                                                                                                                                                                                                                                                                              |
| RIKEN cDNA 1700009P03 gene                                                                                                                                                                                                                                                                                                                                                                           |
| lunatic fringe gene homolog (Drosophila)                                                                                                                                                                                                                                                                                                                                                             |
| phosphodiesterase 6D, cGMP-specific, rod, delta                                                                                                                                                                                                                                                                                                                                                      |
| peroxisome proliferator activated receptor binding protein                                                                                                                                                                                                                                                                                                                                           |
| forkhead box C1                                                                                                                                                                                                                                                                                                                                                                                      |
| ubiquitin specific peptidase 38                                                                                                                                                                                                                                                                                                                                                                      |
| a disintegrin-like and metallopeptidase (repolysin type) with thrombospondin type 1 motif, 1                                                                                                                                                                                                                                                                                                         |
| par-3 (partitioning defective 3) homolog (C. elegans)                                                                                                                                                                                                                                                                                                                                                |
| RAB20, member RAS oncogene family                                                                                                                                                                                                                                                                                                                                                                    |
| ATPase, Cu++ transporting, alpha polypeptide                                                                                                                                                                                                                                                                                                                                                         |
| protocadherin alpha 4 /// protocadherin alpha 6 /// protocadherin alpha 7 /// protocadherin alpha 5 /// protocadherin alpha 11 /// protocadherin alpha 10 /// protocadherin alpha 1 /// protocadherin alpha 9 /// protocadherin alpha 3 /// protocadherin alpha 12 /// protocadherin alpha 2 /// protocadherin alpha 8 /// protocadherin alpha subfamily C, 1 /// protocadherin alpha subfamily C, 2 |
| cytochrome P450, family 4, subfamily v, polypeptide 3                                                                                                                                                                                                                                                                                                                                                |
| ATP-binding cassette, sub-family G (WHITE), member 1                                                                                                                                                                                                                                                                                                                                                 |
| tubulointerstitial nephritis antigen-like                                                                                                                                                                                                                                                                                                                                                            |
| phosphatase and tensin homolog                                                                                                                                                                                                                                                                                                                                                                       |
| protein inhibitor of activated STAT 3                                                                                                                                                                                                                                                                                                                                                                |
| Wolf-Hirschhorn syndrome candidate 2 (human)                                                                                                                                                                                                                                                                                                                                                         |
| Kruppel-like factor 13                                                                                                                                                                                                                                                                                                                                                                               |
| lectin, galactose binding, soluble 8                                                                                                                                                                                                                                                                                                                                                                 |
| BSD domain containing 1                                                                                                                                                                                                                                                                                                                                                                              |
| gene trap ROSA 26, Philippe Soriano                                                                                                                                                                                                                                                                                                                                                                  |
| mitochondrial ribosomal protein S22                                                                                                                                                                                                                                                                                                                                                                  |
| cDNA sequence BC011209                                                                                                                                                                                                                                                                                                                                                                               |
| cyclin-dependent kinase-like 2 (CDC2-related kinase)                                                                                                                                                                                                                                                                                                                                                 |
| karyopherin (importin) alpha 6                                                                                                                                                                                                                                                                                                                                                                       |
| methyltransferase like 8                                                                                                                                                                                                                                                                                                                                                                             |

|                                                                                                    |
|----------------------------------------------------------------------------------------------------|
| myelin basic protein expression factor 2, repressor                                                |
| DEAD (Asp-Glu-Ala-Asp) box polypeptide 52                                                          |
| glycine C-acetyltransferase (2-amino-3-ketobutyrate-coenzyme A ligase)                             |
| regulator of G-protein signalling 10                                                               |
| spermine synthase                                                                                  |
| sarcoglycan, alpha (dystrophin-associated glycoprotein)                                            |
| protein kinase C, nu                                                                               |
| THO complex 4                                                                                      |
| Park2 co-regulated                                                                                 |
| syntaxin 18                                                                                        |
| expressed sequence AI413582                                                                        |
| molybdenum cofactor synthesis 2                                                                    |
| cyclin-dependent kinase inhibitor 2C (p18, inhibits CDK4)                                          |
| hepsin                                                                                             |
| UDP-N-acetyl-alpha-D-galactosamine:polypeptide N-acetylgalactosaminyltransferase 11                |
| 6-phosphofructo-2-kinase/fructose-2,6-biphosphatase 3                                              |
| transmembrane protein 5                                                                            |
| histone deacetylase 2                                                                              |
| gametogenetin binding protein 1                                                                    |
| baculoviral IAP repeat-containing 3                                                                |
| glutathione reductase 1 /// similar to Glutathione reductase, mitochondrial precursor (GR) (GRase) |
| carbonic anhydrase 6                                                                               |
| fidgetin-like 1                                                                                    |
| glycoprotein Ib, beta polypeptide                                                                  |
| polymerase (RNA) III (DNA directed) polypeptide D                                                  |
| tumor-associated calcium signal transducer 2                                                       |
| cytidine 5'-triphosphate synthase 2                                                                |
| translocase of outer mitochondrial membrane 40 homolog (yeast)                                     |
| RIKEN cDNA 2310073E15 gene                                                                         |
| carboxypeptidase D                                                                                 |
| feminization 1 homolog b (C. elegans)                                                              |
| interleukin enhancer binding factor 3                                                              |
| cyclin-dependent kinase 7 (homolog of Xenopus MO15 cdk-activating kinase)                          |
| HD domain containing 2                                                                             |
| zinc finger protein 503                                                                            |
| RIKEN cDNA 5730472N09 gene                                                                         |
| GATA binding protein 6                                                                             |
| DEAD (Asp-Glu-Ala-Asp) box polypeptide 41                                                          |
| RIKEN cDNA 1200004M23 gene                                                                         |
| matrix metallopeptidase 24                                                                         |
| ARP6 actin-related protein 6 homolog (yeast)                                                       |
| Ena-vasodilator stimulated phosphoprotein                                                          |
| opioid growth factor receptor                                                                      |
| HIV TAT specific factor 1                                                                          |
| tumor necrosis factor receptor superfamily, member 19                                              |
| ceroid-lipofuscinosis, neuronal 8                                                                  |
| expressed sequence AI462438                                                                        |
| cDNA sequence BC020002                                                                             |
| transferrin receptor 2                                                                             |
| SWI/SNF related, matrix associated, actin dependent regulator of chromatin, subfamily d, member 2  |
| RIKEN cDNA 1810012N18 gene                                                                         |
| GATA zinc finger domain containing 2A                                                              |
| tetraspanin 12                                                                                     |

|                                                                                 |
|---------------------------------------------------------------------------------|
| Kinesin family member 1C                                                        |
| cytoplasmic polyadenylation element binding protein 1                           |
| poly (A) polymerase alpha                                                       |
| RIKEN cDNA C330011F01 gene /// RIKEN cDNA 6430706D22 gene                       |
| solute carrier family 25, member 36                                             |
| RIKEN cDNA 8430410A17 gene                                                      |
| kelch-like 7 (Drosophila)                                                       |
| SAFB-like, transcription modulator                                              |
| DBF4 homolog (S. cerevisiae)                                                    |
| golgi phosphoprotein 3                                                          |
| TNFRSF1A-associated via death domain                                            |
| casein kinase II, alpha 1 polypeptide                                           |
| RIKEN cDNA 4930511A21 gene /// similar to phosphatase subunit gene g4-1         |
| Fc receptor, IgE, high affinity I, gamma polypeptide                            |
| phosphatidylinositol-4-phosphate 5-kinase, type II, gamma                       |
| interferon gamma receptor 2                                                     |
| homer homolog 2 (Drosophila)                                                    |
| cytotoxic granule-associated RNA binding protein 1                              |
| expressed sequence C77080                                                       |
| protein kinase C, delta                                                         |
| cell division cycle associated 5                                                |
| sema domain, transmembrane domain (TM), and cytoplasmic domain, (semaphorin) 6C |
| axin 1                                                                          |
| RNA binding motif protein 35A                                                   |
| polymerase (DNA-directed), delta interacting protein 3                          |
| RIKEN cDNA 1110067D22 gene                                                      |
| Cbp/p300-interacting transactivator with Glu/Asp-rich carboxy-terminal domain 1 |
| RIKEN cDNA 3110004L20 gene                                                      |
| DNA segment, Chr 10, Wayne State University 102, expressed                      |
| schwannomin interacting protein 1                                               |
| RIKEN cDNA 1110001A16 gene                                                      |
| ubiquitin specific peptidase 33                                                 |
| 2,4-dienoyl CoA reductase 1, mitochondrial                                      |
| RIKEN cDNA E130012A19 gene                                                      |
| zinc finger, AN1-type domain 2A                                                 |
| growth factor receptor bound protein 2-associated protein 1                     |
| expressed sequence AW146242                                                     |
| RIKEN cDNA 2410018C17 gene                                                      |
| RIKEN cDNA 1110059E24 gene                                                      |
| calpain 7                                                                       |
| peptidyl-tRNA hydrolase 2                                                       |
| Nucleolar protein family A, member 1 (H/ACA small nucleolar RNPs)               |
| E74-like factor 1                                                               |
| RNA methyltransferase like 1                                                    |
| RIKEN cDNA 1500001M20 gene                                                      |
| Trf (TATA binding protein-related factor)-proximal protein homolog (Drosophila) |
| RIKEN cDNA 4930432O21 gene                                                      |
| quaking                                                                         |
| RIKEN cDNA 2410002F23 gene                                                      |
| OTU domain containing 4                                                         |
| fatty acid binding protein 9, testis                                            |
| DnaJ (Hsp40) homolog, subfamily C, member 17                                    |
| RAB25, member RAS oncogene family                                               |

|                                                                                                                                                                    |
|--------------------------------------------------------------------------------------------------------------------------------------------------------------------|
| aminopeptidase-like 1                                                                                                                                              |
| aldo-keto reductase family 1, member C21                                                                                                                           |
| adaptor-related protein complex 3, sigma 1 subunit                                                                                                                 |
| RIKEN cDNA D230025D16 gene                                                                                                                                         |
| RIKEN cDNA 4932432N11 gene                                                                                                                                         |
| lanosterol synthase                                                                                                                                                |
| polymerase (RNA) mitochondrial (DNA directed)                                                                                                                      |
| WNK lysine deficient protein kinase 1                                                                                                                              |
| gene model 561, (NCBI)                                                                                                                                             |
| RecQ protein-like                                                                                                                                                  |
| procollagen-lysine, 2-oxoglutarate 5-dioxygenase 3                                                                                                                 |
| ---                                                                                                                                                                |
| chymotrypsin-like                                                                                                                                                  |
| GCN5 general control of amino acid synthesis-like 2 (yeast)                                                                                                        |
| Rho-associated coiled-coil forming kinase 1                                                                                                                        |
| regulator of G-protein signaling 3 /// similar to Regulator of G-protein signaling 3 (RGS3) (C2PA) /// similar to Regulator of G-protein signaling 3 (RGS3) (C2PA) |
| ankyrin repeat and SOCS box-containing protein 6                                                                                                                   |
| RIKEN cDNA 1500011H22 gene                                                                                                                                         |
| phosphoribosyl pyrophosphate synthetase-associated protein 2                                                                                                       |
| Crn, crooked neck-like 1 (Drosophila)                                                                                                                              |
| leucine rich repeat containing 57                                                                                                                                  |
| myosin, heavy polypeptide 3, skeletal muscle, embryonic                                                                                                            |
| muscle glycogen phosphorylase                                                                                                                                      |
| kinesin family member 2C /// similar to Kinesin-like protein KIF2C (Mitotic centromere-associated kinesin) (MCAK)                                                  |
| v-ral simian leukemia viral oncogene homolog B (ras related)                                                                                                       |
| ring finger protein 38                                                                                                                                             |
| SEH1-like (S. cerevisiae                                                                                                                                           |
| replication factor C (activator 1) 2                                                                                                                               |
| protein tyrosine phosphatase, receptor type, K                                                                                                                     |
| phosphodiesterase 4D interacting protein (myomegalin)                                                                                                              |
| active BCR-related gene                                                                                                                                            |
| mitogen activated protein kinase 13                                                                                                                                |
| F-box and WD-40 domain protein 11                                                                                                                                  |
| prostaglandin E synthase 2                                                                                                                                         |
| CD2 antigen (cytoplasmic tail) binding protein 2                                                                                                                   |
| sterol O-acyltransferase 1                                                                                                                                         |
| RIKEN cDNA D030056L22 gene                                                                                                                                         |
| Der1-like domain family, member 2                                                                                                                                  |
| mevalonate (diphospho) decarboxylase                                                                                                                               |
| protein tyrosine phosphatase, receptor-type, F interacting protein, binding protein 2                                                                              |
| DNA segment, Chr 11, ERATO Doi 730, expressed                                                                                                                      |
| DNA segment, Chr 4, Wayne State University 132, expressed                                                                                                          |
| ectonucleoside triphosphate diphosphohydrolase 1                                                                                                                   |
| tubby like protein 4                                                                                                                                               |
| WD repeat domain 42A                                                                                                                                               |
| tetratricopeptide repeat domain 7B                                                                                                                                 |
| similar to U2AF homology motif (UHM) kinase 1                                                                                                                      |
| SAPS domain family, member 3                                                                                                                                       |
| transcription factor 3                                                                                                                                             |
| unc-93 homolog B1 (C. elegans)                                                                                                                                     |
| cDNA sequence BC021395                                                                                                                                             |
| DNA segment, Chr 14, ERATO Doi 436, expressed                                                                                                                      |
| RIKEN cDNA 2610039C10 gene                                                                                                                                         |

|                                                                                                                      |
|----------------------------------------------------------------------------------------------------------------------|
| Rho GTPase activating protein 21                                                                                     |
| ARP1 actin-related protein 1 homolog B (yeast)                                                                       |
| RIKEN cDNA 1500010J02 gene                                                                                           |
| pescadillo homolog 1, containing BRCT domain (zebrafish)                                                             |
| ER degradation enhancer, mannosidase alpha-like 2                                                                    |
| beta-transducin repeat containing protein                                                                            |
| RIKEN cDNA 3300001P08 gene                                                                                           |
| SNAP-associated protein                                                                                              |
| POU domain, class 6, transcription factor 1                                                                          |
| SET and MYND domain containing 2                                                                                     |
| secretory carrier membrane protein 1                                                                                 |
| T-cell lymphoma invasion and metastasis 2                                                                            |
| chromobox homolog 1 (Drosophila HP1 beta)                                                                            |
| mitochondrial trans-2-enoyl-CoA reductase                                                                            |
| similar to NADH-ubiquinone oxidoreductase MWFE subunit (Complex I-MWFE) (CI-MWFE) /// hypothetical protein LOC673100 |
| zinc finger, RAN-binding domain containing 1                                                                         |
| PQ loop repeat containing 1                                                                                          |
| peter pan homolog (Drosophila)                                                                                       |
| UBX domain containing 6                                                                                              |
| eukaryotic translation initiation factor 2B, subunit 5 epsilon                                                       |
| mannose-P-dolichol utilization defect 1                                                                              |
| serine/threonine kinase 39, STE20/SPS1 homolog (yeast)                                                               |
| 1-acylglycerol-3-phosphate O-acyltransferase 3                                                                       |
| protein kinase, AMP-activated, beta 1 non-catalytic subunit                                                          |
| toll interacting protein                                                                                             |
| RIKEN cDNA 2510022D24 gene                                                                                           |
| expressed sequence AU022870                                                                                          |
| golgi associated, gamma adaptin ear containing, ARF binding protein 2                                                |
| cytochrome c oxidase subunit VIb polypeptide 2                                                                       |
| THAP domain containing 4                                                                                             |
| cDNA sequence BC032204                                                                                               |
| four jointed box 1 (Drosophila)                                                                                      |
| transmembrane protein 40                                                                                             |
| leucine rich repeat (in FLII) interacting protein 2                                                                  |
| N-myc downstream regulated gene 4                                                                                    |
| immunoglobulin superfamily, member 8                                                                                 |
| protein phosphatase 6, catalytic subunit                                                                             |
| Rap1 GTPase-activating protein                                                                                       |
| neural precursor cell expressed, developmentally down-regulated gene 1                                               |
| ras responsive element binding protein 1                                                                             |
| checkpoint with forkhead and ring finger domains                                                                     |
| neutral sphingomyelinase (N-SMase) activation associated factor                                                      |
| Ras and Rab interactor 2                                                                                             |
| inhibin beta-B                                                                                                       |
| pleckstrin homology-like domain, family A, member 1                                                                  |
| cornichon homolog 2 (Drosophila)                                                                                     |
| ATP binding domain 1 family, member B                                                                                |
| low density lipoprotein receptor                                                                                     |
| methyl-CpG binding domain protein 2                                                                                  |
| SERTA domain containing 1                                                                                            |
| RIKEN cDNA 1110007C09 gene                                                                                           |
| sema domain, immunoglobulin domain (Ig), transmembrane domain (TM) and short cytoplasmic domain, (semaphorin) 4D     |
| PDZ and LIM domain 7                                                                                                 |



|                                                                                                                                    |
|------------------------------------------------------------------------------------------------------------------------------------|
| origin recognition complex, subunit 2-like (S. cerevisiae)                                                                         |
| solute carrier family 2 (facilitated glucose transporter), member 5                                                                |
| Rho guanine nucleotide exchange factor (GEF) 3                                                                                     |
| D site albumin promoter binding protein                                                                                            |
| antigenic determinant of rec-A protein                                                                                             |
| spindlin                                                                                                                           |
| 6-pyruvoyl-tetrahydropterin synthase                                                                                               |
| coiled-coil domain containing 99                                                                                                   |
| NIMA (never in mitosis gene a)-related expressed kinase 6 /// similar to NIMA (never in mitosis gene a)-related expressed kinase 6 |
| tRNA nucleotidyl transferase, CCA-adding, 1                                                                                        |
| zinc fingers and homeoboxes protein 1                                                                                              |
| discs, large homolog 1 (Drosophila)                                                                                                |
| folylpolyglutamyl synthetase                                                                                                       |
| cytochrome c oxidase, subunit VIIIb                                                                                                |
| keratin complex 1, acidic, gene 15                                                                                                 |
| phosphatidylserine synthase 2                                                                                                      |
| mitogen activated protein kinase kinase kinase 7                                                                                   |
| transmembrane protein 12                                                                                                           |
| ubiquitin-like 4                                                                                                                   |
| ephrin B2                                                                                                                          |
| RIKEN cDNA 2310061C15 gene                                                                                                         |
| nuclear factor I/B                                                                                                                 |
| growth differentiation factor 10                                                                                                   |
| phosphodiesterase 1A, calmodulin-dependent                                                                                         |
| protein tyrosine phosphatase 4a3                                                                                                   |
| tubby-like protein 2                                                                                                               |
| rhotekin                                                                                                                           |
| very low density lipoprotein receptor                                                                                              |
| DNA fragmentation factor, alpha subunit                                                                                            |
| platelet derived growth factor receptor, beta polypeptide                                                                          |
| RAB3B, member RAS oncogene family                                                                                                  |
| sirtuin 3 (silent mating type information regulation 2, homolog) 3 (S. cerevisiae)                                                 |
| adenylate cyclase 3                                                                                                                |
| kinesin family member 1B                                                                                                           |
| RIKEN cDNA 2310008H09 gene                                                                                                         |
| ghrelin                                                                                                                            |
| RuvB-like protein 1                                                                                                                |
| Proteasome (prosome, macropain) subunit, beta type 1                                                                               |
| B-cell receptor-associated protein 29                                                                                              |
| osteoglycin                                                                                                                        |
| block of proliferation 1                                                                                                           |
| telomeric repeat binding factor 1                                                                                                  |
| mitogen-activated protein kinase 8 interacting protein 3                                                                           |
| mitogen activated protein kinase kinase kinase 12                                                                                  |
| 8-oxoguanine DNA-glycosylase 1                                                                                                     |
| similar to CG3835-PA, isoform A                                                                                                    |
| chloride intracellular channel 3                                                                                                   |
| nuclear casein kinase and cyclin-dependent kinase substrate 1                                                                      |
| Fatty acid binding protein 6, ileal (gastrotropin)                                                                                 |
| hairy and enhancer of split 1 (Drosophila)                                                                                         |
| RalBP1 associated Eps domain containing protein                                                                                    |
| RIKEN cDNA 8430437G11 gene                                                                                                         |
| lamin B receptor                                                                                                                   |

|                                                                                          |
|------------------------------------------------------------------------------------------|
| surfactant associated protein B                                                          |
| discs, large homolog 3 (Drosophila)                                                      |
| guanine nucleotide binding protein (G protein), gamma transducing activity polypeptide 2 |
| CCAAT/enhancer binding protein (C/EBP), delta                                            |
| Fanconi anemia, complementation group C                                                  |
| reticulocalbin 1                                                                         |
| acyltransferase like 2                                                                   |
| activator of basal transcription                                                         |
| Purkinje cell protein 4                                                                  |
| G kinase anchoring protein 1 /// similar to G kinase anchoring protein 1                 |
| FBJ osteosarcoma oncogene                                                                |
| factor 8-associated gene A                                                               |
| amyloid beta (A4) precursor protein-binding, family B, member 2                          |
| RIKEN cDNA B230317C12 gene                                                               |
| RIKEN cDNA A030009H04 gene                                                               |
| Widely-interspaced zinc finger motifs /// X-linked myotubular myopathy gene 1            |
| solute carrier family 38, member 5                                                       |
| RIKEN cDNA 2510042P03 gene                                                               |
| small proline-rich protein 1A                                                            |
| growth hormone releasing hormone                                                         |
| Son of sevenless homolog 1 (Drosophila)                                                  |
| protein inhibitor of activated STAT 2                                                    |
| nebulin-related anchoring protein                                                        |
| WAP four-disulfide core domain 12                                                        |
| UDP-Gal:betaGlcNAc beta 1,4-galactosyltransferase, polypeptide 3                         |
| RIKEN cDNA 2310005P05 gene                                                               |
| melanoma antigen, family H, 1                                                            |
| S100 calcium binding protein G                                                           |
| fibroblast growth factor receptor 3                                                      |
| Bcl2-like 2                                                                              |
| acyl-CoA synthetase short-chain family member 1                                          |
| 2-oxoglutarate and iron-dependent oxygenase domain containing 2                          |
| amiloride binding protein 1 (amine oxidase, copper-containing)                           |
| DNA segment, Chr 14, ERATO Doi 231, expressed                                            |
| neuroblastoma ras oncogene                                                               |
| Transcribed locus                                                                        |
| angiotensin I converting enzyme (peptidyl-dipeptidase A) 1                               |
| TCF3 (E2A) fusion partner                                                                |
| methyltransferase-like 3                                                                 |
| SAC1 (suppressor of actin mutations 1, homolog)-like (S. cerevisiae)                     |
| dynamin 1-like                                                                           |
| non-catalytic region of tyrosine kinase adaptor protein 1                                |
| interferon gamma induced GTPase                                                          |
| Gag                                                                                      |
| DDHD domain containing 1                                                                 |
| translocating chain-associating membrane protein 1                                       |
| crystallin, mu                                                                           |
| microtubule associated serine/threonine kinase 2                                         |
| twist homolog 2 (Drosophila)                                                             |
| splicing factor, arginine/serine-rich 14                                                 |
| phosphodiesterase 8A                                                                     |
| chromobox homolog 6                                                                      |
| stromal antigen 3                                                                        |

|                                                                                                                                       |
|---------------------------------------------------------------------------------------------------------------------------------------|
| plakophilin 3                                                                                                                         |
| expressed sequence C80008                                                                                                             |
| ubiquitin specific peptidase 12                                                                                                       |
| centaurin, delta 3                                                                                                                    |
| protein phosphatase 3, catalytic subunit, gamma isoform                                                                               |
| poly (ADP-ribose) glycohydrolase                                                                                                      |
| glyceraldehyde-3-phosphate dehydrogenase, spermatogenic                                                                               |
| serine (or cysteine) peptidase inhibitor, clade A (alpha-1 antiproteinase, antitrypsin), member 12                                    |
| leucine rich repeat containing 6 (testis)                                                                                             |
| calcium channel, voltage-dependent, T type, alpha 1H subunit                                                                          |
| synapsin II                                                                                                                           |
| RIKEN cDNA 2010309E21 gene                                                                                                            |
| GUF1 GTPase homolog (S. cerevisiae)                                                                                                   |
| Dicer1, Dcr-1 homolog (Drosophila)                                                                                                    |
| RIKEN cDNA 9430016H08 gene                                                                                                            |
| regulator of chromosome condensation (RCC1) and BTB (POZ) domain containing protein 1                                                 |
| ATPase, H+ transporting, lysosomal V0 subunit A2                                                                                      |
| signal-induced proliferation-associated 1 like 2                                                                                      |
| Bcl2-associated athanogene 2                                                                                                          |
| RIKEN cDNA 9630050M13 gene                                                                                                            |
| DNA segment, Chr 16, Brigham & Women's Genetics 1494 expressed                                                                        |
| RAS p21 protein activator 4                                                                                                           |
| zinc finger protein 187                                                                                                               |
| sideroflexin 2                                                                                                                        |
| alanine and arginine rich domain containing protein                                                                                   |
| forkhead box K1                                                                                                                       |
| outer dense fiber of sperm tails 2                                                                                                    |
| Kazal-type serine peptidase inhibitor domain 1                                                                                        |
| serine (or cysteine) peptidase inhibitor, clade B, member 9e                                                                          |
| RIKEN cDNA C330027C09 gene                                                                                                            |
| expressed sequence AA408556                                                                                                           |
| Transcribed locus                                                                                                                     |
| diaphanous homolog 1 (Drosophila) /// similar to Protein diaphanous homolog 1 (Diaphanous-related formin-1) (DRF1) (mDIA1) (p140mDIA) |
| Rho guanine nucleotide exchange factor (GEF) 5                                                                                        |
| organic solute transporter alpha                                                                                                      |
| C-terminal binding protein 2 /// zinc finger, RAN-binding domain containing 1                                                         |
| RIKEN cDNA 2700097O09 gene                                                                                                            |
| ataxin 10                                                                                                                             |
| RIKEN cDNA 4921526G09 gene                                                                                                            |
| RIKEN cDNA 1810044D09 gene                                                                                                            |
| outer dense fiber of sperm tails 2-like                                                                                               |
| RIKEN cDNA 4930579C15 gene                                                                                                            |
| angiotensin I converting enzyme (peptidyl-dipeptidase A) 2                                                                            |
| RIKEN cDNA 1110001A07 gene                                                                                                            |
| far upstream element (FUSE) binding protein 1                                                                                         |
| natriuretic peptide receptor 3                                                                                                        |
| RWD domain containing 4A                                                                                                              |
| NFKB inhibitor interacting Ras-like protein 1                                                                                         |
| coiled-coil domain containing 93                                                                                                      |
| IQ motif containing GTPase activating protein 2                                                                                       |
| S100P binding protein                                                                                                                 |
| replication initiator 1                                                                                                               |
| forkhead box D1                                                                                                                       |

|                                                                                              |
|----------------------------------------------------------------------------------------------|
| RIKEN cDNA E130303B06 gene                                                                   |
| transmembrane protein 38B                                                                    |
| RIKEN cDNA 2810422O20 gene                                                                   |
| nucleolar and spindle associated protein 1                                                   |
| expressed sequence AA407270                                                                  |
| RNA binding motif protein 15                                                                 |
| kinesin family member 3B                                                                     |
| RIKEN cDNA 1700097N02 gene                                                                   |
| RIKEN cDNA 5730420B22 gene                                                                   |
| solute carrier organic anion transporter family, member 3a1                                  |
| ---                                                                                          |
| expressed sequence AI428936                                                                  |
| microrchidia 4                                                                               |
| cyclin-dependent kinase inhibitor 1B (P27)                                                   |
| BTB (POZ) domain containing 4                                                                |
| CD79B antigen                                                                                |
| splA/ryanodine receptor domain and SOCS box containing 1                                     |
| ---                                                                                          |
| RIKEN cDNA 4933402J24 gene                                                                   |
| UDP-N-acetyl-alpha-D-galactosamine:polypeptide N-acetylgalactosaminyltransferase 4           |
| kinetochore associated 2 /// RIKEN cDNA 2700099C18 gene                                      |
| RIKEN cDNA 2310010J17 gene                                                                   |
| RIKEN cDNA 2210018M03 gene                                                                   |
| membrane associated DNA binding protein                                                      |
| p21 (CDKN1A)-activated kinase 3                                                              |
| ---                                                                                          |
| interleukin 15 receptor, alpha chain                                                         |
| pleckstrin homology domain containing, family A member 7                                     |
| SRY-box containing gene 18                                                                   |
| synaptotagmin-like 4                                                                         |
| pleckstrin homology domain containing, family A (phosphoinositide binding specific) member 1 |
| bone morphogenetic protein 6                                                                 |
| RIKEN cDNA 6330416G13 gene                                                                   |
| scleraxis                                                                                    |
| zinc finger and BTB domain containing 25                                                     |
| neuromedin U                                                                                 |
| poly (A) polymerase beta (testis specific)                                                   |
| phospholipase A2, group X                                                                    |
| kinesin family member 9                                                                      |
| solute carrier family 6 (neurotransmitter transporter), member 15                            |
| interleukin 15                                                                               |
| phosphoribosyl pyrophosphate synthetase 2                                                    |
| a disintegrin and metallopeptidase domain 22                                                 |
| frizzled homolog 1 (Drosophila)                                                              |
| DEAD (Asp-Glu-Ala-Asp) box polypeptide 25                                                    |
| carbonyl reductase 3                                                                         |
| thioredoxin reductase 3                                                                      |
| RIKEN cDNA D030051N19 gene                                                                   |
| leucine rich repeat protein 1, neuronal                                                      |
| cytokine receptor-like factor 1                                                              |
| ATP synthase, H+ transporting, mitochondrial F1 complex, delta subunit                       |
| proteoglycan 2, bone marrow                                                                  |
| forkhead box G1                                                                              |

|                                                                                                   |
|---------------------------------------------------------------------------------------------------|
| RIKEN cDNA E430014L09 gene                                                                        |
| hairy and enhancer of split 5 (Drosophila)                                                        |
| keratin complex 1, acidic, gene 5                                                                 |
| similar to Y-linked testis-specific protein                                                       |
| sparc/osteonectin, cwcv and kazal-like domains proteoglycan 1                                     |
| RIKEN cDNA 6330409N04 gene                                                                        |
| gene model 1103, (NCBI)                                                                           |
| RIKEN cDNA 2900086B20 gene                                                                        |
| expressed sequence R74862                                                                         |
| solute carrier family 6 (neurotransmitter transporter, GABA), member 1                            |
| DEAD (Asp-Glu-Ala-Asp) box polypeptide 51                                                         |
| SH3 domain containing ring finger 1                                                               |
| RUN and FYVE domain containing 3                                                                  |
| expressed sequence R74740                                                                         |
| PHD finger protein 7                                                                              |
| dipeptidase 3                                                                                     |
| asparagine-linked glycosylation 5 homolog (yeast, dolichyl-phosphate beta-glucosyltransferase)    |
| tribbles homolog 3 (Drosophila)                                                                   |
| fragile X mental retardation 1 neighbor                                                           |
| neurogenin 1                                                                                      |
| sprouty-related, EVH1 domain containing 2                                                         |
| glutaminyI-tRNA synthase (glutamine-hydrolyzing)-like 1                                           |
| Nanog homeobox                                                                                    |
| RIKEN cDNA C630002B14 gene                                                                        |
| phosphate cytidyltransferase 1, choline, alpha isoform                                            |
| DNA segment, Chr 9, ERATO Doi 280, expressed                                                      |
| cDNA sequence BC023882                                                                            |
| SWI/SNF related, matrix associated, actin dependent regulator of chromatin, subfamily d, member 2 |
| Keratin associated protein 5-5                                                                    |
| N-acetylated alpha-linked acidic dipeptidase 2                                                    |
| GTF2I repeat domain containing 2                                                                  |
| cytoplasmic polyadenylation element binding protein 2                                             |
| RIKEN cDNA 1500005I02 gene                                                                        |
| TAO kinase 3                                                                                      |
| zinc finger protein 612                                                                           |
| alpha 1,4-galactosyltransferase                                                                   |
| lin-7 homolog C (C. elegans)                                                                      |
| ---                                                                                               |
| A kinase (PRKA) anchor protein 8                                                                  |
| A kinase (PRKA) anchor protein 8                                                                  |
| ---                                                                                               |
| ---                                                                                               |
| uridine monophosphate synthetase                                                                  |
| intraflagellar transport 81 homolog (Chlamydomonas)                                               |
| Glycerophosphodiester phosphodiesterase domain containing 5                                       |
| ---                                                                                               |
| zinc finger protein 532                                                                           |
| RIKEN cDNA 1600014E20 gene                                                                        |
| F-box and leucine-rich repeat protein 12                                                          |
| src homology 2 domain-containing transforming protein E                                           |
| RIKEN cDNA 1110062M06 gene                                                                        |
| BTB (POZ) domain containing 3                                                                     |
| RIKEN cDNA 2810002I04 gene                                                                        |

|                                                                                                                                                                                                                                                                                                                                                                                                                                                                                                                             |
|-----------------------------------------------------------------------------------------------------------------------------------------------------------------------------------------------------------------------------------------------------------------------------------------------------------------------------------------------------------------------------------------------------------------------------------------------------------------------------------------------------------------------------|
| ectonucleoside triphosphate diphosphohydrolase 7                                                                                                                                                                                                                                                                                                                                                                                                                                                                            |
| septin 10                                                                                                                                                                                                                                                                                                                                                                                                                                                                                                                   |
| expressed sequence AA408650                                                                                                                                                                                                                                                                                                                                                                                                                                                                                                 |
| expressed sequence AA415014                                                                                                                                                                                                                                                                                                                                                                                                                                                                                                 |
| monoacylglycerol O-acyltransferase 2                                                                                                                                                                                                                                                                                                                                                                                                                                                                                        |
| phospholipase A2, group IVF                                                                                                                                                                                                                                                                                                                                                                                                                                                                                                 |
| RIKEN cDNA 1810013L24 gene                                                                                                                                                                                                                                                                                                                                                                                                                                                                                                  |
| transketolase-like 1                                                                                                                                                                                                                                                                                                                                                                                                                                                                                                        |
| desert hedgehog                                                                                                                                                                                                                                                                                                                                                                                                                                                                                                             |
| poly (ADP-ribose) polymerase family, member 16                                                                                                                                                                                                                                                                                                                                                                                                                                                                              |
| estrogen receptor 1 (alpha)                                                                                                                                                                                                                                                                                                                                                                                                                                                                                                 |
| RIKEN cDNA 6330509M23 gene                                                                                                                                                                                                                                                                                                                                                                                                                                                                                                  |
| serine (or cysteine) peptidase inhibitor, clade B, member 9f /// serine (or cysteine) peptidase inhibitor, clade B, member 9e /// serine (or cysteine) peptidase inhibitor, clade B, member 9g /// similar to serine (or cysteine) proteinase inhibitor, clade B, member 9f                                                                                                                                                                                                                                                 |
| p300/CBP-associated factor                                                                                                                                                                                                                                                                                                                                                                                                                                                                                                  |
| dickkopf homolog 2 (Xenopus laevis)                                                                                                                                                                                                                                                                                                                                                                                                                                                                                         |
| bone morphogenetic protein 2                                                                                                                                                                                                                                                                                                                                                                                                                                                                                                |
| Eph receptor A5                                                                                                                                                                                                                                                                                                                                                                                                                                                                                                             |
| Tu translation elongation factor, mitochondrial /// similar to Tu translation elongation factor, mitochondrial                                                                                                                                                                                                                                                                                                                                                                                                              |
| S100 calcium binding protein A13                                                                                                                                                                                                                                                                                                                                                                                                                                                                                            |
| NADH dehydrogenase (ubiquinone) 1, alpha/beta subcomplex, 1                                                                                                                                                                                                                                                                                                                                                                                                                                                                 |
| NIMA (never in mitosis gene a)-related expressed kinase 1                                                                                                                                                                                                                                                                                                                                                                                                                                                                   |
| Patatin-like phospholipase domain containing 1                                                                                                                                                                                                                                                                                                                                                                                                                                                                              |
| ---                                                                                                                                                                                                                                                                                                                                                                                                                                                                                                                         |
| gene model 288, (NCBI)                                                                                                                                                                                                                                                                                                                                                                                                                                                                                                      |
| ribosomal protein L24 /// similar to ribosomal protein L24 /// similar to ribosomal protein L24                                                                                                                                                                                                                                                                                                                                                                                                                             |
| RIKEN cDNA 6030426L16 gene /// similar to RIKEN cDNA 6030426L16 /// similar to gonadotropin inducible ovarian transcription factor 1 /// similar to Hippocalcin-like protein 1 (Visinin-like protein 3) (VILIP-3) (Neural visinin-like protein 3) (NVL-3) (NVP-3) /// similar to Hippocalcin-like protein 1 (Visinin-like protein 3) (VILIP-3) (Neural visinin-like protein 3) (NVL-3) (NVP-3) /// similar to Hippocalcin-like protein 1 (Visinin-like protein 3) (VILIP-3) (Neural visinin-like protein 3) (NVL-3) (NVP-3) |
| Bcl2-associated athanogene 2                                                                                                                                                                                                                                                                                                                                                                                                                                                                                                |
| kelch domain containing 4 /// hypothetical gene supported by NM_145605                                                                                                                                                                                                                                                                                                                                                                                                                                                      |
| ---                                                                                                                                                                                                                                                                                                                                                                                                                                                                                                                         |
| sciellin                                                                                                                                                                                                                                                                                                                                                                                                                                                                                                                    |
| Calmodulin 2                                                                                                                                                                                                                                                                                                                                                                                                                                                                                                                |
| ---                                                                                                                                                                                                                                                                                                                                                                                                                                                                                                                         |
| SAC3 domain containing 1                                                                                                                                                                                                                                                                                                                                                                                                                                                                                                    |
| RIKEN cDNA 2610001J05 gene                                                                                                                                                                                                                                                                                                                                                                                                                                                                                                  |
| ubiquitin-conjugating enzyme E2C                                                                                                                                                                                                                                                                                                                                                                                                                                                                                            |
| cytidine monophospho-N-acetylneuraminic acid synthetase                                                                                                                                                                                                                                                                                                                                                                                                                                                                     |
| development and differentiation enhancing                                                                                                                                                                                                                                                                                                                                                                                                                                                                                   |
| heat shock protein 1 (chaperonin) /// chaperonin                                                                                                                                                                                                                                                                                                                                                                                                                                                                            |
| Transcribed locus                                                                                                                                                                                                                                                                                                                                                                                                                                                                                                           |
| RIKEN cDNA 4632417K18 gene                                                                                                                                                                                                                                                                                                                                                                                                                                                                                                  |
| ---                                                                                                                                                                                                                                                                                                                                                                                                                                                                                                                         |
| growth differentiation factor 3                                                                                                                                                                                                                                                                                                                                                                                                                                                                                             |
| ATP synthase, H+ transporting, mitochondrial F1 complex, delta subunit                                                                                                                                                                                                                                                                                                                                                                                                                                                      |
| ---                                                                                                                                                                                                                                                                                                                                                                                                                                                                                                                         |
| ---                                                                                                                                                                                                                                                                                                                                                                                                                                                                                                                         |
| inhibitor of growth family, member 4                                                                                                                                                                                                                                                                                                                                                                                                                                                                                        |
| solute carrier family 23 (nucleobase transporters), member 3                                                                                                                                                                                                                                                                                                                                                                                                                                                                |
| thymidine kinase 1 /// similar to Thymidine kinase, cytosolic /// similar to Thymidine kinase, cytosolic                                                                                                                                                                                                                                                                                                                                                                                                                    |
| erythrocyte protein band 4.2                                                                                                                                                                                                                                                                                                                                                                                                                                                                                                |
| expressed sequence AL033326                                                                                                                                                                                                                                                                                                                                                                                                                                                                                                 |
| ---                                                                                                                                                                                                                                                                                                                                                                                                                                                                                                                         |

|                                                                                                                               |
|-------------------------------------------------------------------------------------------------------------------------------|
| ---                                                                                                                           |
| glutamyl aminopeptidase                                                                                                       |
| ---                                                                                                                           |
| transforming growth factor, beta induced                                                                                      |
| epiregulin                                                                                                                    |
| POU domain, class 5, transcription factor 1                                                                                   |
| myeloblastosis oncogene-like 2                                                                                                |
| expressed in non-metastatic cells 1, protein                                                                                  |
| RNA binding motif protein 35b                                                                                                 |
| amyloid beta (A4) precursor protein-binding, family B, member 2                                                               |
| preproenkephalin 1                                                                                                            |
| lipin 2                                                                                                                       |
| ---                                                                                                                           |
| uridine-cytidine kinase 1                                                                                                     |
| ---                                                                                                                           |
| RIKEN cDNA 1810030O07 gene                                                                                                    |
| DNA methyltransferase 3A                                                                                                      |
| dual specificity phosphatase 8                                                                                                |
| barren homolog (Drosophila)                                                                                                   |
| interferon activated gene 202B                                                                                                |
| keratin complex 2, basic, gene 19                                                                                             |
| keratin complex 2, basic, gene 19                                                                                             |
| stomatin                                                                                                                      |
| ---                                                                                                                           |
| centaurin, delta 3                                                                                                            |
| ---                                                                                                                           |
| interferon activated gene 204 /// similar to Interferon-activatable protein 204 (Ifi-204) (Interferon-inducible protein p204) |
| dual specificity phosphatase 16                                                                                               |
| SET translocation                                                                                                             |
| dystroglycan 1                                                                                                                |
| tyrosine kinase receptor 1                                                                                                    |
| Kruppel-like factor 4 (gut)                                                                                                   |
| thymidylate kinase family LPS-inducible member                                                                                |
| RIKEN cDNA 5730589K01 gene                                                                                                    |
| laminin, beta 3                                                                                                               |
| ---                                                                                                                           |
| RIKEN cDNA 1110057K04 gene                                                                                                    |
| G-rich RNA sequence binding factor 1                                                                                          |
| Interleukin 4 receptor, alpha                                                                                                 |
| ---                                                                                                                           |
| tumor necrosis factor receptor superfamily, member 1a                                                                         |
| SNW domain containing 1                                                                                                       |
| a disintegrin and metallopeptidase domain 3 (cyritestin)                                                                      |
| DNA segment, Chr 10, Wayne State University 52, expressed                                                                     |
| ---                                                                                                                           |
| UBX domain containing 5                                                                                                       |
| ---                                                                                                                           |
| solute carrier family 9 (sodium/hydrogen exchanger), member 1                                                                 |
| platelet derived growth factor receptor, alpha polypeptide                                                                    |
| tetratricopeptide repeat, ankyrin repeat and coiled-coil containing 1                                                         |
| RAB GTPase activating protein 1-like                                                                                          |
| Cytochrome c oxidase, subunit VIIIb                                                                                           |
| pleckstrin homology domain containing, family H (with MyTH4 domain) member 1                                                  |

|                                                                        |
|------------------------------------------------------------------------|
| ---                                                                    |
| Calumenin                                                              |
| RAB3A interacting protein                                              |
| cyclic nucleotide gated channel alpha 2                                |
| SRY-box containing gene 6                                              |
| angiotensin II receptor, type 2                                        |
| ---                                                                    |
| cDNA sequence BC037034                                                 |
| cholinergic receptor, nicotinic, gamma polypeptide                     |
| transition protein 1                                                   |
| ---                                                                    |
| platelet-activating factor acetylhydrolase, isoform 1b, alpha1 subunit |
| ---                                                                    |
| ubinuclein 1                                                           |
| asparagine synthetase                                                  |
| transmembrane protein 50B                                              |
| filamin, beta                                                          |
| angiotensin I converting enzyme (peptidyl-dipeptidase A) 1             |
| cryptochrome 1 (photolyase-like)                                       |
| RIKEN cDNA 1700073E17 gene                                             |
| ---                                                                    |
| Enabled homolog (Drosophila)                                           |
| Protamine 2                                                            |
| solute carrier family 30 (zinc transporter), member 4                  |
| reelin                                                                 |
| GPI-anchored membrane protein 1                                        |
| proviral integration site 2                                            |
| septin 4                                                               |
| HLA-B associated transcript 4                                          |
| RIKEN cDNA 2610209M04 gene                                             |
| sno, strawberry notch homolog 1 (Drosophila)                           |
| chaperonin subunit 3 (gamma)                                           |
| Cell adhesion molecule with homology to L1CAM                          |
| ---                                                                    |
| Nucleolar complex associated 4 homolog (S. cerevisiae)                 |
| ubiquitin specific peptidase 39                                        |
| abhydrolase domain containing 8                                        |
| proline-serine-threonine phosphatase-interacting protein 1             |
| kelch-like 21 (Drosophila)                                             |
| Arginase type II                                                       |
| DiGeorge syndrome critical region gene 2                               |
| ---                                                                    |
| adaptor protein complex AP-1, beta 1 subunit                           |
| importin 4                                                             |
| ---                                                                    |
| tripartite motif protein 25                                            |
| procollagen-lysine, 2-oxoglutarate 5-dioxygenase 3                     |
| catenin (cadherin associated protein), alpha 1                         |
| voltage-dependent anion channel 2                                      |
| origin recognition complex, subunit 5-like (S. cerevisiae)             |
| sorting nexin 17                                                       |
| ---                                                                    |
| serine (or cysteine) peptidase inhibitor, clade A, member 5            |



|                                                                                   |
|-----------------------------------------------------------------------------------|
| ral guanine nucleotide dissociation stimulator,-like 1                            |
| hydroxysteroid dehydrogenase-1, delta<5>-3-beta                                   |
| outer dense fiber of sperm tails 2                                                |
| caspase 2                                                                         |
| ---                                                                               |
| lymphocyte protein tyrosine kinase                                                |
| coiled-coil domain containing 52                                                  |
| UDP-GlcNAc:betaGal beta-1,3-N-acetylglucosaminyltransferase 2                     |
| ---                                                                               |
| renin 1 structural /// renin 2 tandem duplication of Ren1                         |
| WNK lysine deficient protein kinase 1                                             |
| protoporphyrinogen oxidase                                                        |
| ---                                                                               |
| DEAD/H (Asp-Glu-Ala-Asp/His) box polypeptide 3, X-linked                          |
| ---                                                                               |
| kinesin family member 3A                                                          |
| SRY-box containing gene 3                                                         |
| torsin family 3, member A                                                         |
| ornithine aminotransferase                                                        |
| ---                                                                               |
| pelota homolog (Drosophila)                                                       |
| ---                                                                               |
| Keratin complex 2, basic, gene 6g                                                 |
| ---                                                                               |
| Thioredoxin reductase 3                                                           |
| STT3, subunit of the oligosaccharyltransferase complex, homolog A (S. cerevisiae) |
| arylsulfatase A                                                                   |
| MYB binding protein (P160) 1a                                                     |
| lectin, mannose-binding, 1                                                        |
| ---                                                                               |
| bromodomain containing 7 /// similar to bromodomain containing 7                  |
| disabled homolog 1 (Drosophila)                                                   |
| polo-like kinase 1 (Drosophila)                                                   |
| proteasome (prosome, macropain) 28 subunit, alpha                                 |
| clusterin                                                                         |
| mitogen-activated protein kinase kinase kinase kinase 4                           |
| ---                                                                               |
| pre-B lymphocyte gene 1                                                           |
| ---                                                                               |
| ---                                                                               |
| ---                                                                               |
| lectin, galactose binding, soluble 9                                              |
| regenerating islet-derived 2                                                      |
| ---                                                                               |
| guanine nucleotide binding protein, related sequence 1                            |
| ubiquitin specific peptidase 4 (proto-oncogene)                                   |
| RIKEN cDNA 1810054D07 gene                                                        |
| calpain 10                                                                        |
| yes-associated protein 1                                                          |
| regulator of G-protein signaling 11                                               |
| ---                                                                               |
| Small nuclear ribonucleoprotein E                                                 |
| ---                                                                               |

|                                                                                                                                                                                                                                                       |
|-------------------------------------------------------------------------------------------------------------------------------------------------------------------------------------------------------------------------------------------------------|
| hexokinase 2                                                                                                                                                                                                                                          |
| zinc finger, UBR1 type 1                                                                                                                                                                                                                              |
| transmembrane 4 superfamily member 1                                                                                                                                                                                                                  |
| ---                                                                                                                                                                                                                                                   |
| ---                                                                                                                                                                                                                                                   |
| catenin (cadherin associated protein), alpha 2                                                                                                                                                                                                        |
| coatomer protein complex, subunit zeta 1                                                                                                                                                                                                              |
| tropomyosin 2, beta                                                                                                                                                                                                                                   |
| apolipoprotein E                                                                                                                                                                                                                                      |
| ATPase family, AAA domain containing 3A                                                                                                                                                                                                               |
| carbamoyl-phosphate synthetase 2, aspartate transcarbamylase, and dihydroorotase                                                                                                                                                                      |
| ATP synthase, H+ transporting, mitochondrial F0 complex, subunit c (subunit 9), isoform 1 /// similar to ATP synthase lipid-binding protein, mitochondrial precursor (ATP synthase proteolipid P1) (ATPase protein 9) (ATPase subunit C)              |
| uridine phosphorylase 1                                                                                                                                                                                                                               |
| serine (or cysteine) peptidase inhibitor, clade A, member 6                                                                                                                                                                                           |
| ribosomal protein L10A /// similar to ribosomal protein L10a                                                                        |
| uroporphyrinogen decarboxylase                                                                                                                                                                                                                        |
| capping protein (actin filament) muscle Z-line, beta                                                                                                                                                                                                  |
| adenine phosphoribosyl transferase                                                                                                                                                                                                                    |
| ---                                                                                                                                                                                                                                                   |
| cell division cycle associated 5                                                                                                                                                                                                                      |
| DNA segment, Chr 1, ERATO Doi 161, expressed                                                                                                                                                                                                          |
| zinc finger protein 277                                                                                                                                                                                                                               |
| small nuclear ribonucleoprotein B                                                                                                                                                                                                                     |
| N-deacetylase/N-sulfotransferase (heparan glucosaminyl) 2                                                                                                                                                                                             |
| tryptophanyl-tRNA synthetase                                                                                                                                                                                                                          |
| ubiquinol-cytochrome c reductase (6.4kD) subunit                                                                                                                                                                                                      |
| seryl-aminoacyl-tRNA synthetase 2                                                                                                                                                                                                                     |
| paired-like homeodomain transcription factor 2                                                                                                                                                                                                        |
| GA repeat binding protein, beta 1                                                                                                                                                                                                                     |
| eukaryotic translation initiation factor 4B                                                                                                                                                                                                           |
| ---                                                                                                                                                                                                                                                   |
| eukaryotic translation termination factor 1                                                                                                                                                                                                           |
| Cytochrome P450, family 7, subfamily b, polypeptide 1                                                                                                                                                                                                 |
| kallikrein 8                                                                                                                                                                                                                                          |
| RNA polymerase 1-1                                                                                                                                                                                                                                    |
| PDZ and LIM domain 1 (elfin) /// similar to PDZ and LIM domain protein 1 (Elfin) (LIM domain protein CLP-36) (C-terminal LIM domain protein 1)                                                                                                        |
| Dolichol-phosphate (beta-D) mannosyltransferase 2                                                                                                                                                                                                     |
| ectonucleotide pyrophosphatase/phosphodiesterase 2                                                                                                                                                                                                    |
| ---                                                                                                                                                                                                                                                   |
| ---                                                                                                                                                                                                                                                   |
| RIKEN cDNA 1110007M04 gene                                                                                                                                                                                                                            |
| RIKEN cDNA 6330403K07 gene                                                                                                                                                                                                                            |
| hypothetical protein 6030458H05                                                                                                                                                                                                                       |
| ---                                                                                                                                                                                                                                                   |
| glutathione S-transferase, mu 2 /// similar to Glutathione S-transferase Mu 2 (GST class-mu 2) (Glutathione S-transferase pmGT2) (GST 5-5) /// similar to Glutathione S-transferase Mu 2 (GST class-mu 2) (Glutathione S-transferase pmGT2) (GST 5-5) |
| dipeptidase 3                                                                                                                                                                                                                                         |
| apolipoprotein A-I binding protein                                                                                                                                                                                                                    |
| ornithine decarboxylase antizyme                                                                                                                                                                                                                      |
| troponin T1, skeletal, slow                                                                                                                                                                                                                           |
| ---                                                                                                                                                                                                                                                   |
| ---                                                                                                                                                                                                                                                   |
| Fas-associated factor 1                                                                                                                                                                                                                               |
| ---                                                                                                                                                                                                                                                   |

|                                                                                                   |
|---------------------------------------------------------------------------------------------------|
| cadherin 15 /// similar to Muscle-cadherin precursor (M-cadherin) (Cadherin-15) (Cadherin-14)     |
| Hermansky-Pudlak syndrome 1 homolog (human)                                                       |
| cytochrome P450, family 1, subfamily b, polypeptide 1                                             |
| ---                                                                                               |
| syndecan 1                                                                                        |
| protein tyrosine phosphatase, receptor type, K                                                    |
| heterogeneous nuclear ribonucleoprotein D-like                                                    |
| fibromodulin                                                                                      |
| oxidoreductase NAD-binding domain containing 1                                                    |
| ---                                                                                               |
| ---                                                                                               |
| EGF-like module containing, mucin-like, hormone receptor-like sequence 1                          |
| runt related transcription factor 2                                                               |
| RNA polymerase 1-4                                                                                |
| RAB31, member RAS oncogene family                                                                 |
| nuclear receptor coactivator 4                                                                    |
| transforming growth factor, beta 3                                                                |
| TEA domain family member 1                                                                        |
| Transcribed locus                                                                                 |
| tryptophan hydroxylase 1                                                                          |
| DEAD (Asp-Glu-Ala-Asp) box polypeptide 1                                                          |
| SAFB-like, transcription modulator                                                                |
| testis nuclear RNA binding protein                                                                |
| asparagine synthetase domain containing 1                                                         |
| POU domain, class 6, transcription factor 1                                                       |
| aldehyde dehydrogenase 18 family, member A1                                                       |
| leucine rich repeat containing 23                                                                 |
| ---                                                                                               |
| histone 1, H2bp                                                                                   |
| ---                                                                                               |
| ubiquitin-conjugating enzyme E2O                                                                  |
| dihydroorotate dehydrogenase                                                                      |
| dynein, axonemal, heavy chain 8                                                                   |
| glycosylphosphatidylinositol specific phospholipase D1                                            |
| ribophorin I                                                                                      |
| aldehyde dehydrogenase family 3, subfamily A2                                                     |
| leucine rich repeat containing 35                                                                 |
| acrosomal vesicle protein 1                                                                       |
| betaine-homocysteine methyltransferase /// similar to Betaine--homocysteine S-methyltransferase   |
| RIKEN cDNA 2610019F03 gene                                                                        |
| Transcribed locus                                                                                 |
| inositol polyphosphate-1-phosphatase                                                              |
| ---                                                                                               |
| deoxynucleotidyltransferase, terminal                                                             |
| ---                                                                                               |
| ---                                                                                               |
| Cell division cycle 25 homolog A (S. cerevisiae)                                                  |
| methionyl aminopeptidase 1                                                                        |
| SWI/SNF related, matrix associated, actin dependent regulator of chromatin, subfamily d, member 2 |
| poliovirus receptor-related 3                                                                     |
| TROVE domain family, member 2                                                                     |
| v-myc myelocytomatosis viral related oncogene, neuroblastoma derived (avian)                      |
| nuclear receptor subfamily 5, group A, member 1                                                   |

|                                                                                                             |
|-------------------------------------------------------------------------------------------------------------|
| ribosomal protein S6 kinase polypeptide 1                                                                   |
| Dolichyl-phosphate (UDP-N-acetylglucosamine) acetylglucosaminophosphotransferase 1 (GlcNAc-1-P transferase) |
| glutamate-rich WD repeat containing 1                                                                       |
| uncoupling protein 1 (mitochondrial, proton carrier)                                                        |
| ---                                                                                                         |
| RIKEN cDNA 1110049F12 gene                                                                                  |
| DNA segment, Chr 4, Wayne State University 132, expressed                                                   |
| DNA segment, Chr 3, Wayne State University 161, expressed                                                   |
| E2F transcription factor 1                                                                                  |
| ---                                                                                                         |
| expressed sequence AA408420                                                                                 |
| prolactin regulatory element binding                                                                        |
| expressed sequence C80913                                                                                   |
| squamous cell carcinoma antigen recognized by T-cells 3                                                     |
| phosphatidylinositol glycan, class A                                                                        |
| coronin, actin binding protein, 2B                                                                          |
| RIKEN cDNA 1810013D10 gene                                                                                  |
| adenosine deaminase, RNA-specific, B1                                                                       |
| RIKEN cDNA 6530401N04 gene /// hypothetical protein LOC638977                                               |
| ---                                                                                                         |
| adaptor-related protein complex AP-1, mu subunit 1                                                          |
| suppressor of variegation 4-20 homolog 2 (Drosophila)                                                       |
| ---                                                                                                         |
| peripheral myelin protein                                                                                   |
| Adipose differentiation related protein                                                                     |
| integrator complex subunit 5                                                                                |
| ankyrin repeat domain 13c                                                                                   |
| HtrA serine peptidase 2                                                                                     |
| ---                                                                                                         |
| ---                                                                                                         |
| CWF19-like 1, cell cycle control (S. pombe)                                                                 |
| presenilin 1                                                                                                |
| chloride channel 5                                                                                          |
| ---                                                                                                         |
| G-rich RNA sequence binding factor 1                                                                        |
| RIKEN cDNA 2610312B22 gene /// similar to brain zinc finger protein                                         |
| RAE1 RNA export 1 homolog (S. pombe)                                                                        |
| ---                                                                                                         |
| cell division cycle 2-like 1                                                                                |
| coagulation factor VII                                                                                      |
| prolyl endopeptidase                                                                                        |
| epidermal growth factor                                                                                     |
| ---                                                                                                         |
| RIKEN cDNA 2610005L07 gene                                                                                  |
| neuron specific gene family member 1                                                                        |
| serine/threonine kinase 24 (STE20 homolog, yeast)                                                           |
| ---                                                                                                         |
| ankyrin repeat and SOCS box-containing protein 3                                                            |
| ATPase, Na <sup>+</sup> /K <sup>+</sup> transporting, beta 1 polypeptide                                    |
| Heart and neural crest derivatives expressed transcript 1                                                   |
| acyl-Coenzyme A dehydrogenase, short chain                                                                  |
| Metal response element binding transcription factor 2                                                       |
| REST corepressor 1                                                                                          |

|                                                                                                                                                                                                           |
|-----------------------------------------------------------------------------------------------------------------------------------------------------------------------------------------------------------|
| lectin, mannose-binding 2                                                                                                                                                                                 |
| guanine nucleotide binding protein (G protein), gamma 11                                                                                                                                                  |
| dipeptidase 3                                                                                                                                                                                             |
| cytochrome c oxidase, subunit VIIIc                                                                                                                                                                       |
| prosaposin                                                                                                                                                                                                |
| ---                                                                                                                                                                                                       |
| methylenetetrahydrofolate dehydrogenase (NAD+ dependent), methenyltetrahydrofolate cyclohydrolase                                                                                                         |
| cardiotrophin 1                                                                                                                                                                                           |
| ---                                                                                                                                                                                                       |
| BCL2/adenovirus E1B interacting protein 1, NIP1                                                                                                                                                           |
| similar to peripherin 1                                                                                                                                                                                   |
| ---                                                                                                                                                                                                       |
| Tripartite motif protein 47                                                                                                                                                                               |
| ---                                                                                                                                                                                                       |
| immunoglobulin heavy chain (J558 family) /// similar to immunoglobulin heavy chain variable region /// similar to immunoglobulin mu-chain /// similar to anti-poly(dC) monoclonal antibody heavy chain    |
| ---                                                                                                                                                                                                       |
| mitochondrial ribosomal protein L36                                                                                                                                                                       |
| transmembrane protein 109                                                                                                                                                                                 |
| cytochrome c oxidase, subunit Va                                                                                                                                                                          |
| F-box only protein 3                                                                                                                                                                                      |
| mannoside acetylglucosaminyltransferase 1                                                                                                                                                                 |
| ---                                                                                                                                                                                                       |
| ATP synthase, H+ transporting, mitochondrial F1 complex, delta subunit                                                                                                                                    |
| creatine kinase, mitochondrial 1, ubiquitous                                                                                                                                                              |
| keratin complex 1, acidic, gene 17                                                                                                                                                                        |
| integrin alpha 7                                                                                                                                                                                          |
| ribosomal protein L23                                                                                                                                                                                     |
| ---                                                                                                                                                                                                       |
| Bcl-associated death promoter                                                                                                                                                                             |
| ---                                                                                                                                                                                                       |
| SET and MYND domain containing 5                                                                                                                                                                          |
| ---                                                                                                                                                                                                       |
| DNA segment, Chr 10, ERATO Doi 214, expressed                                                                                                                                                             |
| Transcribed locus                                                                                                                                                                                         |
| copper chaperone for superoxide dismutase                                                                                                                                                                 |
| NADH dehydrogenase (ubiquinone) 1 alpha subcomplex, assembly factor 1                                                                                                                                     |
| SUB1 homolog (S. cerevisia /// similar to Activated RNA polymerase II transcriptional coactivator p15 precursor (SUB1 homolog) (Positive cofactor 4) (PC4) (p14) (Single-stranded DNA-binding protein p9) |
| matrix metallopeptidase 2                                                                                                                                                                                 |
| ---                                                                                                                                                                                                       |
| hypothetical protein LOC677168                                                                                                                                                                            |
| DiGeorge syndrome critical region gene 6                                                                                                                                                                  |
| chromatin modifying protein 1B                                                                                                                                                                            |
| ---                                                                                                                                                                                                       |
| tissue inhibitor of metalloproteinase 2                                                                                                                                                                   |
| vesicle-associated membrane protein, associated protein A                                                                                                                                                 |
| ---                                                                                                                                                                                                       |
| angiopoietin-like 4                                                                                                                                                                                       |
| ---                                                                                                                                                                                                       |
| RIKEN cDNA 2610029G23 gene                                                                                                                                                                                |
| protein phosphatase 1, regulatory (inhibitor) subunit 12C                                                                                                                                                 |
| cystatin C                                                                                                                                                                                                |
| calmodulin 2                                                                                                                                                                                              |
| glucose phosphate isomerase 1 /// hypothetical protein LOC669429 /// similar to Glucose-6-phosphate isomerase (GPI) (Phosphoglucose isomerase) (PGI) (Phosphohexose isomerase) (PHI) (Neuroleukin) (NLK)  |

|                                                                                                                                                                                                |
|------------------------------------------------------------------------------------------------------------------------------------------------------------------------------------------------|
| rod outer segment membrane protein 1                                                                                                                                                           |
| ---                                                                                                                                                                                            |
| cyclin I                                                                                                                                                                                       |
| polymerase (DNA directed), delta 1, catalytic subunit                                                                                                                                          |
| claudin 11                                                                                                                                                                                     |
| sema domain, immunoglobulin domain (Ig), transmembrane domain (TM) and short cytoplasmic domain, (semaphorin) 4A                                                                               |
| Early growth response 2                                                                                                                                                                        |
| RIKEN cDNA 2610304G08 gene                                                                                                                                                                     |
| ---                                                                                                                                                                                            |
| RIKEN cDNA 1110038D17 gene                                                                                                                                                                     |
| ---                                                                                                                                                                                            |
| dual specificity phosphatase 6                                                                                                                                                                 |
| tripeptidyl peptidase II                                                                                                                                                                       |
| tyrosinase-related protein 1                                                                                                                                                                   |
| trichohyalin                                                                                                                                                                                   |
| transmembrane protein 77                                                                                                                                                                       |
| trichohyalin                                                                                                                                                                                   |
| transmembrane protein 129                                                                                                                                                                      |
| ---                                                                                                                                                                                            |
| colony stimulating factor 2 receptor, beta 2, low-affinity (granulocyte-macrophage)                                                                                                            |
| myosin, heavy polypeptide 4, skeletal muscle                                                                                                                                                   |
| ---                                                                                                                                                                                            |
| ---                                                                                                                                                                                            |
| receptor-like tyrosine kinase                                                                                                                                                                  |
| C1q and tumor necrosis factor related protein 1                                                                                                                                                |
| valosin containing protein /// similar to Transitional endoplasmic reticulum ATPase (TER ATPase) (15S Mg(2+)-ATPase p97 subunit) (Valosin-containing protein) (VCP)                            |
| RIO kinase 3 (yeast)                                                                                                                                                                           |
| xeroderma pigmentosum, complementation group A                                                                                                                                                 |
| RIKEN cDNA A030009H04 gene                                                                                                                                                                     |
| Coenzyme A synthase                                                                                                                                                                            |
| solute carrier family 2, (facilitated glucose transporter), member 8                                                                                                                           |
| ubiquitin specific peptidase 52                                                                                                                                                                |
| menage a trois 1                                                                                                                                                                               |
| ---                                                                                                                                                                                            |
| ---                                                                                                                                                                                            |
| X-ray repair complementing defective repair in Chinese hamster cells 1                                                                                                                         |
| Surfeit gene 5                                                                                                                                                                                 |
| RIKEN cDNA 2210018M03 gene                                                                                                                                                                     |
| ---                                                                                                                                                                                            |
| cDNA sequence X99384                                                                                                                                                                           |
| ---                                                                                                                                                                                            |
| asialoglycoprotein receptor 1                                                                                                                                                                  |
| transducer of ErbB-2.1                                                                                                                                                                         |
| mitogen activated protein kinase kinase kinase 4                                                                                                                                               |
| creatine kinase, muscle                                                                                                                                                                        |
| RIKEN cDNA 4921531G14 gene                                                                                                                                                                     |
| complement component 1, r subcomponent /// similar to Complement C1r-B subcomponent precursor (Complement component 1, r-B subcomponent) /// similar to complement component 1, r subcomponent |
| ---                                                                                                                                                                                            |
| solute carrier family 4, sodium bicarbonate cotransporter, member 7                                                                                                                            |
| ATPase, Ca++-sequestering                                                                                                                                                                      |
| mitogen activated protein kinase 10                                                                                                                                                            |
| TRAF type zinc finger domain containing 1                                                                                                                                                      |
| coiled-coil domain containing 96                                                                                                                                                               |

|                                                                                          |
|------------------------------------------------------------------------------------------|
| ---                                                                                      |
| Splicing factor proline/glutamine rich (polypyrimidine tract binding protein associated) |
| RIKEN cDNA 6330412F12 gene                                                               |
| MBD2-interacting zinc finger                                                             |
| WW domain binding protein 11                                                             |
| mitogen activated protein kinase 1                                                       |
| E74-like factor 1                                                                        |
| glycoprotein 5 (platelet)                                                                |
| centromere protein E                                                                     |
| heat-responsive protein 12                                                               |
| desert hedgehog                                                                          |
| N-acetyltransferase ARD1 homolog (S. cerevisiae)                                         |
| proliferin /// proliferin 2 /// mitogen regulated protein, proliferin 3                  |
| galanin                                                                                  |
| Tubulin, alpha 4                                                                         |
| adaptor protein complex AP-1, gamma 1 subunit                                            |
| galactose mutarotase                                                                     |
| ---                                                                                      |
| A kinase (PRKA) anchor protein 8                                                         |
| mitochondrial ribosomal protein L49                                                      |
| glial cell line derived neurotrophic factor                                              |
| block of proliferation 1                                                                 |
| ---                                                                                      |
| DNA methyltransferase (cytosine-5) 1                                                     |
| G protein beta subunit-like                                                              |
| erythrocyte protein band 4.1-like 4a                                                     |
| Kinesin-associated protein 3                                                             |
| Zinc finger protein 37                                                                   |
| tigger transposable element derived 5                                                    |
| gap junction membrane channel protein beta 6                                             |
| hyaluronoglucosaminidase 2                                                               |
| regulator of G-protein signaling 16                                                      |
| N-myc downstream regulated gene 2                                                        |
| EMI domain containing 1                                                                  |
| tubulin, beta 3 /// similar to tubulin, beta 3 /// similar to tubulin, beta 3            |
| CHMP family, member 7                                                                    |
| tubulin, beta 2a                                                                         |
| ---                                                                                      |
| reprimin, TP53 dependent G2 arrest mediator candidate                                    |
| ---                                                                                      |
| ---                                                                                      |
| mitogen activated protein kinase 8 interacting protein 1                                 |
| CWF19-like 1, cell cycle control (S. pombe)                                              |
| CGG triplet repeat binding protein 1                                                     |
| ---                                                                                      |
| acyl-Coenzyme A dehydrogenase, very long chain                                           |
| ---                                                                                      |
| low-density lipoprotein receptor-related protein 10                                      |
| plasminogen                                                                              |
| Protein kinase D2                                                                        |
| fibulin 1                                                                                |
| alpha fetoprotein                                                                        |
| ---                                                                                      |

|                                                                                                                                                                                                                                                                                                                                                                                                                                                                                               |
|-----------------------------------------------------------------------------------------------------------------------------------------------------------------------------------------------------------------------------------------------------------------------------------------------------------------------------------------------------------------------------------------------------------------------------------------------------------------------------------------------|
| Cleavage stimulation factor, 3' pre-RNA, subunit 1                                                                                                                                                                                                                                                                                                                                                                                                                                            |
| PHD finger protein 7                                                                                                                                                                                                                                                                                                                                                                                                                                                                          |
| ---                                                                                                                                                                                                                                                                                                                                                                                                                                                                                           |
| delta-like 1 (Drosophila)                                                                                                                                                                                                                                                                                                                                                                                                                                                                     |
| RIKEN cDNA 1110008H02 gene                                                                                                                                                                                                                                                                                                                                                                                                                                                                    |
| polo-like kinase 3 (Drosophila)                                                                                                                                                                                                                                                                                                                                                                                                                                                               |
| epidermal growth factor binding protein type B /// kallikrein 1 /// kallikrein 1-related petidase b26 /// kallikrein 1-related peptidase b5                                                                                                                                                                                                                                                                                                                                                   |
| protein interacting with C kinase 1                                                                                                                                                                                                                                                                                                                                                                                                                                                           |
| gastrin                                                                                                                                                                                                                                                                                                                                                                                                                                                                                       |
| expressed sequence AW491445                                                                                                                                                                                                                                                                                                                                                                                                                                                                   |
| ---                                                                                                                                                                                                                                                                                                                                                                                                                                                                                           |
| regenerating islet-derived 3 alpha                                                                                                                                                                                                                                                                                                                                                                                                                                                            |
| ---                                                                                                                                                                                                                                                                                                                                                                                                                                                                                           |
| guanidinoacetate methyltransferase                                                                                                                                                                                                                                                                                                                                                                                                                                                            |
| activating transcription factor 3                                                                                                                                                                                                                                                                                                                                                                                                                                                             |
| kelch domain containing 2                                                                                                                                                                                                                                                                                                                                                                                                                                                                     |
| keratin complex 2, basic, gene 4                                                                                                                                                                                                                                                                                                                                                                                                                                                              |
| complement receptor related protein                                                                                                                                                                                                                                                                                                                                                                                                                                                           |
| ---                                                                                                                                                                                                                                                                                                                                                                                                                                                                                           |
| secretory leukocyte peptidase inhibitor                                                                                                                                                                                                                                                                                                                                                                                                                                                       |
| ---                                                                                                                                                                                                                                                                                                                                                                                                                                                                                           |
| isocitrate dehydrogenase 3 (NAD+) alpha                                                                                                                                                                                                                                                                                                                                                                                                                                                       |
| Nanog homeobox                                                                                                                                                                                                                                                                                                                                                                                                                                                                                |
| PREDICTED: Mus musculus similar to 40S ribosomal protein S4, X isoform, transcript variant 1 (LOC225134), mRNA                                                                                                                                                                                                                                                                                                                                                                                |
| defender against cell death 1                                                                                                                                                                                                                                                                                                                                                                                                                                                                 |
| protein C                                                                                                                                                                                                                                                                                                                                                                                                                                                                                     |
| ribosomal protein 10 /// similar to ribosomal protein L10 /// similar to 60S ribosomal protein L10 (QM protein) (Tumor suppressor QM) (Laminin receptor homolog) /// similar to 60S ribosomal protein L10 (QM protein) (Tumor suppressor QM) (Laminin receptor homolog) /// similar to 60S ribosomal protein L10 (QM protein) (Tumor suppressor QM) (Laminin receptor homolog) |
| mitogen activated protein kinase kinase kinase 11                                                                                                                                                                                                                                                                                                                                                                                                                                             |
| acid phosphatase 1, soluble /// similar to acid phosphatase 1, soluble                                                                                                                                                                                                                                                                                                                                                                                                                        |
| ---                                                                                                                                                                                                                                                                                                                                                                                                                                                                                           |
| Inositol 1,4,5-triphosphate receptor 1                                                                                                                                                                                                                                                                                                                                                                                                                                                        |
| SAP30 binding protein /// similar to transcriptional regulator protein                                                                                                                                                                                                                                                                                                                                                                                                                        |
| DnaJ (Hsp40) homolog, subfamily C, member 19 /// similar to translocase of the inner mitochondrial membrane 14 isoform 1                                                                                                                                                                                                                                                                                                                                                                      |
| mitochondrial ribosomal protein L50                                                                                                                                                                                                                                                                                                                                                                                                                                                           |
| MAP/microtubule affinity-regulating kinase 1                                                                                                                                                                                                                                                                                                                                                                                                                                                  |
| growth arrest and DNA-damage-inducible 45 beta                                                                                                                                                                                                                                                                                                                                                                                                                                                |
| transmembrane protein 59                                                                                                                                                                                                                                                                                                                                                                                                                                                                      |
| P450 (cytochrome) oxidoreductase                                                                                                                                                                                                                                                                                                                                                                                                                                                              |
| nascent polypeptide-associated complex alpha polypeptide /// similar to nascent polypeptide-associated complex alpha polypeptide /// similar to nascent polypeptide-associated complex alpha polypeptide /// similar to nascent polypeptide-associated complex alpha polypeptide                                                                                                                                                                                                              |
| homeo box A11, opposite strand transcript                                                                                                                                                                                                                                                                                                                                                                                                                                                     |
| ---                                                                                                                                                                                                                                                                                                                                                                                                                                                                                           |
| mitogen activated protein kinase kinase kinase 7                                                                                                                                                                                                                                                                                                                                                                                                                                              |
| ---                                                                                                                                                                                                                                                                                                                                                                                                                                                                                           |
| ---                                                                                                                                                                                                                                                                                                                                                                                                                                                                                           |
| ---                                                                                                                                                                                                                                                                                                                                                                                                                                                                                           |
| shugoshin-like 1 (S. pombe)                                                                                                                                                                                                                                                                                                                                                                                                                                                                   |
| ---                                                                                                                                                                                                                                                                                                                                                                                                                                                                                           |
| inositol polyphosphate-5-phosphatase D                                                                                                                                                                                                                                                                                                                                                                                                                                                        |
| ---                                                                                                                                                                                                                                                                                                                                                                                                                                                                                           |
| nuclear receptor subfamily 1, group H, member 2                                                                                                                                                                                                                                                                                                                                                                                                                                               |
| seryl-aminoacyl-tRNA synthetase 2                                                                                                                                                                                                                                                                                                                                                                                                                                                             |
| GPI anchor attachment protein 1                                                                                                                                                                                                                                                                                                                                                                                                                                                               |



|                                                                             |
|-----------------------------------------------------------------------------|
| GTP binding protein 1                                                       |
| lipocalin 2                                                                 |
| Nuclear fragile X mental retardation protein interacting protein 1          |
| X-ray repair complementing defective repair in Chinese hamster cells 5      |
| solute carrier family 29 (nucleoside transporters), member 1                |
| ---                                                                         |
| interleukin 1 receptor, type II                                             |
| granzyme G                                                                  |
| HIV TAT specific factor 1                                                   |
| ---                                                                         |
| DNA segment, Chr 1, ERATO Doi 161, expressed                                |
| prostaglandin-endoperoxide synthase 1                                       |
| solute carrier family 6 (neurotransmitter transporter, serotonin), member 4 |
| expressed sequence C77080                                                   |
| DNA segment, Chr 14, ERATO Doi 436, expressed                               |
| arginine/proline rich coiled-coil 1                                         |
| interferon regulatory factor 6                                              |
| neutral sphingomyelinase (N-SMase) activation associated factor             |
| ---                                                                         |
| laminin, alpha 5 /// similar to Laminin alpha-5 chain precursor             |
| annexin A1                                                                  |
| CD36 antigen                                                                |
| ---                                                                         |
| laminin, gamma 1                                                            |
| ---                                                                         |
| multiple PDZ domain protein                                                 |
| Fanconi anemia, complementation group C                                     |
| RIKEN cDNA 1810073N04 gene                                                  |
| C. elegans ceh-10 homeo domain containing homolog                           |
| BCL2/adenovirus E1B interacting protein 1, NIP2                             |
| prostaglandin F receptor                                                    |
| monoamine oxidase A                                                         |
| DNA segment, Chr 4, ERATO Doi 196, expressed                                |
| FBJ osteosarcoma oncogene                                                   |
| zinc finger protein 26                                                      |
| Braf transforming gene                                                      |
| RIKEN cDNA 1500034J01 gene                                                  |
| proacrosin binding protein                                                  |
| cytochrome P450, family 17, subfamily a, polypeptide 1                      |
| glutathione S-transferase, mu 5                                             |
| WD repeat and FYVE domain containing 2                                      |
| trans-golgi network protein /// trans-golgi network protein 2               |
| ubiquitin-conjugating enzyme E2 variant 2                                   |
| dynamin 2                                                                   |
| RAD52 homolog (S. cerevisiae)                                               |
| phosphodiesterase 4D interacting protein (myomegalin)                       |
| Josephin domain containing 1                                                |
| integrin, alpha E, epithelial-associated                                    |
| ribonucleotide reductase M1                                                 |
| ---                                                                         |
| sulfide quinone reductase-like (yeast)                                      |
| Calmegin                                                                    |
| RIKEN cDNA 5730469M10 gene                                                  |

|                                                                                        |
|----------------------------------------------------------------------------------------|
| ---                                                                                    |
| UTP18, small subunit (SSU) processome component, homolog (yeast)                       |
| ilvB (bacterial acetolactate synthase)-like                                            |
| polymerase (DNA directed), alpha 2                                                     |
| recombination activating gene 1                                                        |
| zinc finger protein 503                                                                |
| ---                                                                                    |
| eukaryotic translation initiation factor 3, subunit 9 (eta)                            |
| MAP/microtubule affinity-regulating kinase 3                                           |
| heat shock protein 4                                                                   |
| brix domain containing 2                                                               |
| Myosin Vb                                                                              |
| ---                                                                                    |
| taurine upregulated gene 1                                                             |
| neural cell adhesion molecule 1                                                        |
| R3H domain and coiled-coil containing 1                                                |
| chemokine (C-X3-C motif) ligand 1                                                      |
| glycerol-3-phosphate dehydrogenase 1 (soluble)                                         |
| galactosidase, beta 1                                                                  |
| endoplasmic reticulum protein 29                                                       |
| RNA methyltransferase like 1                                                           |
| RAN binding protein 5                                                                  |
| RNA binding motif protein 9                                                            |
| lecithin cholesterol acyltransferase                                                   |
| retinoblastoma binding protein 6                                                       |
| heat shock protein 90kDa alpha (cytosolic), class B member 1                           |
| ---                                                                                    |
| phosphatidylinositol-4-phosphate 5-kinase, type II, gamma                              |
| src homology three (SH3) and cysteine rich domain                                      |
| regulator of G-protein signalling 10                                                   |
| DALR anticodon binding domain containing 3                                             |
| mitochondrial ribosomal protein S18A                                                   |
| mitogen activated protein kinase kinase kinase 8                                       |
| biphenyl hydrolase-like (serine hydrolase, breast epithelial mucin-associated antigen) |
| DNA segment, Chr 1, ERATO Doi 161, expressed                                           |
| G protein-coupled receptor 162                                                         |
| GTF2I repeat domain containing 2                                                       |
| CDP-diacylglycerol synthase (phosphatidate cytidyltransferase) 2                       |
| lysophospholipase 1                                                                    |
| ---                                                                                    |
| matrilin 2                                                                             |
| excision repair cross-complementing rodent repair deficiency, complementation group 5  |
| ral guanine nucleotide dissociation stimulator                                         |
| crystallin, lamda 1                                                                    |
| crystallin, gamma B                                                                    |
| microtubule-associated protein 4                                                       |
| Zinc finger, DHHC domain containing 14                                                 |
| Aldehyde dehydrogenase family 7, member A1                                             |
| ---                                                                                    |
| bin3, bicoid-interacting 3, homolog (Drosophila)                                       |
| ---                                                                                    |
| chromatin licensing and DNA replication factor 1                                       |
| endothelial differentiation sphingolipid G-protein-coupled receptor 1                  |

|                                                                                                                                                                             |
|-----------------------------------------------------------------------------------------------------------------------------------------------------------------------------|
| ---                                                                                                                                                                         |
| RAB3A, member RAS oncogene family                                                                                                                                           |
| TBC1 domain family, member 10a                                                                                                                                              |
| nuclear receptor subfamily 2, group F, member 2                                                                                                                             |
| laminin, alpha 4                                                                                                                                                            |
| DNA segment, Chr 16, Brigham & Women's Genetics 1494 expressed                                                                                                              |
| PRP39 pre-mRNA processing factor 39 homolog (yeast)                                                                                                                         |
| potassium voltage-gated channel, subfamily Q, member 1                                                                                                                      |
| exportin, tRNA (nuclear export receptor for tRNAs)                                                                                                                          |
| general transcription factor IIIC, polypeptide 4                                                                                                                            |
| potassium inwardly-rectifying channel, subfamily J, member 9                                                                                                                |
| DEAD (Asp-Glu-Ala-Asp) box polypeptide 50                                                                                                                                   |
| sema domain, immunoglobulin domain (Ig), short basic domain, secreted, (semaphorin) 3B                                                                                      |
| Early growth response 1                                                                                                                                                     |
| ---                                                                                                                                                                         |
| biphenyl hydrolase-like (serine hydrolase, breast epithelial mucin-associated antigen)                                                                                      |
| NOL1/NOP2/Sun domain family 2                                                                                                                                               |
| ATPase, H+ transporting, lysosomal accessory protein 1                                                                                                                      |
| TBC1 domain family, member 22a                                                                                                                                              |
| Ena-vasodilator stimulated phosphoprotein                                                                                                                                   |
| ring finger protein 4                                                                                                                                                       |
| ---                                                                                                                                                                         |
| protein tyrosine phosphatase, receptor type, A                                                                                                                              |
| ---                                                                                                                                                                         |
| ---                                                                                                                                                                         |
| Ring finger protein (C3HC4 type) 19                                                                                                                                         |
| major urinary protein 1 /// major urinary protein 2 /// major urinary protein 3 /// similar to alpha-2u-globulin V precursor - mouse /// similar to alpha-2u globulin PGCL3 |
| glycolipid transfer protein                                                                                                                                                 |
| splA/ryanodine receptor domain and SOCS box containing 1                                                                                                                    |
| carbonic anhydrase 4                                                                                                                                                        |
| lysosomal-associated protein transmembrane 5                                                                                                                                |
| GATA binding protein 2                                                                                                                                                      |
| ectonucleoside triphosphate diphosphohydrolase 2                                                                                                                            |
| seminal vesicle protein 2                                                                                                                                                   |
| CD151 antigen                                                                                                                                                               |
| indoleamine-pyrrole 2,3 dioxygenase                                                                                                                                         |
| CEA-related cell adhesion molecule 10                                                                                                                                       |
| glutamate-ammonia ligase (glutamine synthetase)                                                                                                                             |
| hemopexin                                                                                                                                                                   |
| ---                                                                                                                                                                         |
| nestin                                                                                                                                                                      |
| molybdenum cofactor sulfurase                                                                                                                                               |
| cytochrome P450, family 1, subfamily a, polypeptide 1                                                                                                                       |
| colony stimulating factor 1 receptor                                                                                                                                        |
| ---                                                                                                                                                                         |
| granzyme C                                                                                                                                                                  |
| S100 calcium binding protein G                                                                                                                                              |
| zinc fingers and homeoboxes protein 1                                                                                                                                       |
| RIKEN cDNA 1700013L23 gene                                                                                                                                                  |
| actin related protein 2/3 complex, subunit 5-like                                                                                                                           |
| RAS-like, family 2, locus 9 /// similar to RAN, member RAS oncogene family                                                                                                  |
| kallikrein 1-related peptidase b3                                                                                                                                           |
| RIKEN cDNA 2310073E15 gene                                                                                                                                                  |

|                                                                                                                                                                                                                                                                                                                                                                                                                                                                                                                                                                                                                                                                                                                                                                                                                                                                                                                                                                                                                                                                                                                                                                                                                                                                                                                                                                                                                                |
|--------------------------------------------------------------------------------------------------------------------------------------------------------------------------------------------------------------------------------------------------------------------------------------------------------------------------------------------------------------------------------------------------------------------------------------------------------------------------------------------------------------------------------------------------------------------------------------------------------------------------------------------------------------------------------------------------------------------------------------------------------------------------------------------------------------------------------------------------------------------------------------------------------------------------------------------------------------------------------------------------------------------------------------------------------------------------------------------------------------------------------------------------------------------------------------------------------------------------------------------------------------------------------------------------------------------------------------------------------------------------------------------------------------------------------|
| Ets variant gene 4 (E1A enhancer binding protein, E1AF)                                                                                                                                                                                                                                                                                                                                                                                                                                                                                                                                                                                                                                                                                                                                                                                                                                                                                                                                                                                                                                                                                                                                                                                                                                                                                                                                                                        |
| ---                                                                                                                                                                                                                                                                                                                                                                                                                                                                                                                                                                                                                                                                                                                                                                                                                                                                                                                                                                                                                                                                                                                                                                                                                                                                                                                                                                                                                            |
| ---                                                                                                                                                                                                                                                                                                                                                                                                                                                                                                                                                                                                                                                                                                                                                                                                                                                                                                                                                                                                                                                                                                                                                                                                                                                                                                                                                                                                                            |
| T-cell lymphoma invasion and metastasis 1                                                                                                                                                                                                                                                                                                                                                                                                                                                                                                                                                                                                                                                                                                                                                                                                                                                                                                                                                                                                                                                                                                                                                                                                                                                                                                                                                                                      |
| myelin-associated glycoprotein                                                                                                                                                                                                                                                                                                                                                                                                                                                                                                                                                                                                                                                                                                                                                                                                                                                                                                                                                                                                                                                                                                                                                                                                                                                                                                                                                                                                 |
| RIKEN cDNA 2210016L21 gene                                                                                                                                                                                                                                                                                                                                                                                                                                                                                                                                                                                                                                                                                                                                                                                                                                                                                                                                                                                                                                                                                                                                                                                                                                                                                                                                                                                                     |
| protein tyrosine phosphatase, non-receptor type 22 (lymphoid)                                                                                                                                                                                                                                                                                                                                                                                                                                                                                                                                                                                                                                                                                                                                                                                                                                                                                                                                                                                                                                                                                                                                                                                                                                                                                                                                                                  |
| insulin II                                                                                                                                                                                                                                                                                                                                                                                                                                                                                                                                                                                                                                                                                                                                                                                                                                                                                                                                                                                                                                                                                                                                                                                                                                                                                                                                                                                                                     |
| ---                                                                                                                                                                                                                                                                                                                                                                                                                                                                                                                                                                                                                                                                                                                                                                                                                                                                                                                                                                                                                                                                                                                                                                                                                                                                                                                                                                                                                            |
| biphenyl hydrolase-like (serine hydrolase, breast epithelial mucin-associated antigen)                                                                                                                                                                                                                                                                                                                                                                                                                                                                                                                                                                                                                                                                                                                                                                                                                                                                                                                                                                                                                                                                                                                                                                                                                                                                                                                                         |
| RNA polymerase 1-3                                                                                                                                                                                                                                                                                                                                                                                                                                                                                                                                                                                                                                                                                                                                                                                                                                                                                                                                                                                                                                                                                                                                                                                                                                                                                                                                                                                                             |
| protein kinase C, theta                                                                                                                                                                                                                                                                                                                                                                                                                                                                                                                                                                                                                                                                                                                                                                                                                                                                                                                                                                                                                                                                                                                                                                                                                                                                                                                                                                                                        |
| GATA zinc finger domain containing 2A                                                                                                                                                                                                                                                                                                                                                                                                                                                                                                                                                                                                                                                                                                                                                                                                                                                                                                                                                                                                                                                                                                                                                                                                                                                                                                                                                                                          |
| ---                                                                                                                                                                                                                                                                                                                                                                                                                                                                                                                                                                                                                                                                                                                                                                                                                                                                                                                                                                                                                                                                                                                                                                                                                                                                                                                                                                                                                            |
| kinesin family member 20A                                                                                                                                                                                                                                                                                                                                                                                                                                                                                                                                                                                                                                                                                                                                                                                                                                                                                                                                                                                                                                                                                                                                                                                                                                                                                                                                                                                                      |
| expressed sequence AI428936                                                                                                                                                                                                                                                                                                                                                                                                                                                                                                                                                                                                                                                                                                                                                                                                                                                                                                                                                                                                                                                                                                                                                                                                                                                                                                                                                                                                    |
| retinoblastoma 1                                                                                                                                                                                                                                                                                                                                                                                                                                                                                                                                                                                                                                                                                                                                                                                                                                                                                                                                                                                                                                                                                                                                                                                                                                                                                                                                                                                                               |
| synuclein, gamma                                                                                                                                                                                                                                                                                                                                                                                                                                                                                                                                                                                                                                                                                                                                                                                                                                                                                                                                                                                                                                                                                                                                                                                                                                                                                                                                                                                                               |
| LSM domain containing 1                                                                                                                                                                                                                                                                                                                                                                                                                                                                                                                                                                                                                                                                                                                                                                                                                                                                                                                                                                                                                                                                                                                                                                                                                                                                                                                                                                                                        |
| CD82 antigen                                                                                                                                                                                                                                                                                                                                                                                                                                                                                                                                                                                                                                                                                                                                                                                                                                                                                                                                                                                                                                                                                                                                                                                                                                                                                                                                                                                                                   |
| S100 calcium binding protein A13                                                                                                                                                                                                                                                                                                                                                                                                                                                                                                                                                                                                                                                                                                                                                                                                                                                                                                                                                                                                                                                                                                                                                                                                                                                                                                                                                                                               |
| CD3 antigen, delta polypeptide                                                                                                                                                                                                                                                                                                                                                                                                                                                                                                                                                                                                                                                                                                                                                                                                                                                                                                                                                                                                                                                                                                                                                                                                                                                                                                                                                                                                 |
| phosphatidylserine synthase 1                                                                                                                                                                                                                                                                                                                                                                                                                                                                                                                                                                                                                                                                                                                                                                                                                                                                                                                                                                                                                                                                                                                                                                                                                                                                                                                                                                                                  |
| microsomal glutathione S-transferase 2                                                                                                                                                                                                                                                                                                                                                                                                                                                                                                                                                                                                                                                                                                                                                                                                                                                                                                                                                                                                                                                                                                                                                                                                                                                                                                                                                                                         |
| Eph receptor A4                                                                                                                                                                                                                                                                                                                                                                                                                                                                                                                                                                                                                                                                                                                                                                                                                                                                                                                                                                                                                                                                                                                                                                                                                                                                                                                                                                                                                |
| Moloney sarcoma oncogene                                                                                                                                                                                                                                                                                                                                                                                                                                                                                                                                                                                                                                                                                                                                                                                                                                                                                                                                                                                                                                                                                                                                                                                                                                                                                                                                                                                                       |
| DnaJ (Hsp40) homolog, subfamily C, member 3                                                                                                                                                                                                                                                                                                                                                                                                                                                                                                                                                                                                                                                                                                                                                                                                                                                                                                                                                                                                                                                                                                                                                                                                                                                                                                                                                                                    |
| heat shock protein 90kDa alpha (cytosolic), class A member 1 /// similar to heat shock protein 1, alpha                                                                                                                                                                                                                                                                                                                                                                                                                                                                                                                                                                                                                                                                                                                                                                                                                                                                                                                                                                                                                                                                                                                                                                                                                                                                                                                        |
| ubiquitin specific peptidase 15                                                                                                                                                                                                                                                                                                                                                                                                                                                                                                                                                                                                                                                                                                                                                                                                                                                                                                                                                                                                                                                                                                                                                                                                                                                                                                                                                                                                |
| rhodopsin                                                                                                                                                                                                                                                                                                                                                                                                                                                                                                                                                                                                                                                                                                                                                                                                                                                                                                                                                                                                                                                                                                                                                                                                                                                                                                                                                                                                                      |
| ---                                                                                                                                                                                                                                                                                                                                                                                                                                                                                                                                                                                                                                                                                                                                                                                                                                                                                                                                                                                                                                                                                                                                                                                                                                                                                                                                                                                                                            |
| glucosamine (N-acetyl)-6-sulfatase                                                                                                                                                                                                                                                                                                                                                                                                                                                                                                                                                                                                                                                                                                                                                                                                                                                                                                                                                                                                                                                                                                                                                                                                                                                                                                                                                                                             |
| ---                                                                                                                                                                                                                                                                                                                                                                                                                                                                                                                                                                                                                                                                                                                                                                                                                                                                                                                                                                                                                                                                                                                                                                                                                                                                                                                                                                                                                            |
| fragile X mental retardation syndrome 1 homolog                                                                                                                                                                                                                                                                                                                                                                                                                                                                                                                                                                                                                                                                                                                                                                                                                                                                                                                                                                                                                                                                                                                                                                                                                                                                                                                                                                                |
| creatine kinase, mitochondrial 2                                                                                                                                                                                                                                                                                                                                                                                                                                                                                                                                                                                                                                                                                                                                                                                                                                                                                                                                                                                                                                                                                                                                                                                                                                                                                                                                                                                               |
| Catalase                                                                                                                                                                                                                                                                                                                                                                                                                                                                                                                                                                                                                                                                                                                                                                                                                                                                                                                                                                                                                                                                                                                                                                                                                                                                                                                                                                                                                       |
| receptor accessory protein 1                                                                                                                                                                                                                                                                                                                                                                                                                                                                                                                                                                                                                                                                                                                                                                                                                                                                                                                                                                                                                                                                                                                                                                                                                                                                                                                                                                                                   |
| CTD (carboxy-terminal domain, RNA polymerase II, polypeptide A) small phosphatase 2                                                                                                                                                                                                                                                                                                                                                                                                                                                                                                                                                                                                                                                                                                                                                                                                                                                                                                                                                                                                                                                                                                                                                                                                                                                                                                                                            |
| ---                                                                                                                                                                                                                                                                                                                                                                                                                                                                                                                                                                                                                                                                                                                                                                                                                                                                                                                                                                                                                                                                                                                                                                                                                                                                                                                                                                                                                            |
| zinc finger protein 259                                                                                                                                                                                                                                                                                                                                                                                                                                                                                                                                                                                                                                                                                                                                                                                                                                                                                                                                                                                                                                                                                                                                                                                                                                                                                                                                                                                                        |
| Retinol dehydrogenase 13 (all-trans and 9-cis)                                                                                                                                                                                                                                                                                                                                                                                                                                                                                                                                                                                                                                                                                                                                                                                                                                                                                                                                                                                                                                                                                                                                                                                                                                                                                                                                                                                 |
| baculoviral IAP repeat-containing 2                                                                                                                                                                                                                                                                                                                                                                                                                                                                                                                                                                                                                                                                                                                                                                                                                                                                                                                                                                                                                                                                                                                                                                                                                                                                                                                                                                                            |
| fragile X mental retardation gene 1, autosomal homolog                                                                                                                                                                                                                                                                                                                                                                                                                                                                                                                                                                                                                                                                                                                                                                                                                                                                                                                                                                                                                                                                                                                                                                                                                                                                                                                                                                         |
| GRAM domain containing 3                                                                                                                                                                                                                                                                                                                                                                                                                                                                                                                                                                                                                                                                                                                                                                                                                                                                                                                                                                                                                                                                                                                                                                                                                                                                                                                                                                                                       |
| RIKEN cDNA 2410018L13 gene /// RIKEN cDNA 3110053B16 gene /// similar to Hippocalcin-like protein 1 (Visinin-like protein 3) (VILIP-3) (Neural visinin-like protein 3) (NVL-3) (NVP-3) /// similar to Hippocalcin-like protein 1 (Visinin-like protein 3) (VILIP-3) (Neural visinin-like protein 3) (NVL-3) (NVP-3) /// similar to Hippocalcin-like protein 1 (Visinin-like protein 3) (VILIP-3) (Neural visinin-like protein 3) (NVL-3) (NVP-3) /// similar to Hippocalcin-like protein 1 (Visinin-like protein 3) (VILIP-3) (Neural visinin-like protein 3) (NVL-3) (NVP-3) /// similar to Hippocalcin-like protein 1 (Visinin-like protein 3) (VILIP-3) (Neural visinin-like protein 3) (NVL-3) (NVP-3) /// similar to Hippocalcin-like protein 1 (Visinin-like protein 3) (VILIP-3) (Neural visinin-like protein 3) (NVL-3) (NVP-3) /// similar to development- and differentiation-enhancing factor 2 /// similar to Hippocalcin-like protein 1 (Visinin-like protein 3) (VILIP-3) (Neural visinin-like protein 3) (NVL-3) (NVP-3) /// similar to Hippocalcin-like protein 1 (Visinin-like protein 3) (VILIP-3) (Neural visinin-like protein 3) (NVL-3) (NVP-3) /// similar to Hippocalcin-like protein 1 (Visinin-like protein 3) (VILIP-3) (Neural visinin-like protein 3) (NVL-3) (NVP-3) /// similar to Hippocalcin-like protein 1 (Visinin-like protein 3) (VILIP-3) (Neural visinin-like protein 3) (NVL-3) (NVP-3) |
| tetratricopeptide repeat domain 1                                                                                                                                                                                                                                                                                                                                                                                                                                                                                                                                                                                                                                                                                                                                                                                                                                                                                                                                                                                                                                                                                                                                                                                                                                                                                                                                                                                              |
| COMM domain containing 9                                                                                                                                                                                                                                                                                                                                                                                                                                                                                                                                                                                                                                                                                                                                                                                                                                                                                                                                                                                                                                                                                                                                                                                                                                                                                                                                                                                                       |
| Aldolase 1, A isoform                                                                                                                                                                                                                                                                                                                                                                                                                                                                                                                                                                                                                                                                                                                                                                                                                                                                                                                                                                                                                                                                                                                                                                                                                                                                                                                                                                                                          |
| pancreatitis-associated protein                                                                                                                                                                                                                                                                                                                                                                                                                                                                                                                                                                                                                                                                                                                                                                                                                                                                                                                                                                                                                                                                                                                                                                                                                                                                                                                                                                                                |

|                                                                                                                                              |
|----------------------------------------------------------------------------------------------------------------------------------------------|
| ---                                                                                                                                          |
| desmoplakin                                                                                                                                  |
| phosphatidylethanolamine N-methyltransferase                                                                                                 |
| splicing factor 1                                                                                                                            |
| WD repeat domain 81                                                                                                                          |
| defender against cell death 1                                                                                                                |
| phosphoribosyl pyrophosphate synthetase 1 /// expressed sequence AU021838                                                                    |
| metaxin 1                                                                                                                                    |
| linker for activation of T cells family, member 2                                                                                            |
| adrenergic receptor, beta 3                                                                                                                  |
| bone morphogenetic protein 2                                                                                                                 |
| guanine nucleotide binding protein, alpha o                                                                                                  |
| nuclear factor of kappa light polypeptide gene enhancer in B-cells inhibitor, zeta                                                           |
| cystic fibrosis transmembrane conductance regulator homolog                                                                                  |
| ---                                                                                                                                          |
| RIKEN cDNA 2410022L05 gene                                                                                                                   |
| tenascin XB                                                                                                                                  |
| ubiquitin-fold modifier 1                                                                                                                    |
| ---                                                                                                                                          |
| mitochondrial ribosomal protein L2                                                                                                           |
| eukaryotic translation initiation factor 4E member 2                                                                                         |
| numb gene homolog (Drosophila)                                                                                                               |
| Ferritin heavy chain 1                                                                                                                       |
| lymphocyte specific 1                                                                                                                        |
| Transcribed locus, strongly similar to XP_215069.3 PREDICTED: similar to Tu translation elongation factor, mitochondrial [Rattus norvegicus] |
| serine (or cysteine) peptidase inhibitor, clade F, member 2                                                                                  |
| phenylethanolamine-N-methyltransferase                                                                                                       |
| aldo-keto reductase family 1, member B7                                                                                                      |
| ---                                                                                                                                          |
| SWI/SNF-related, matrix-associated actin-dependent regulator of chromatin, subfamily a, containing DEAD/H box 1`                             |
| protease (prosome, macropain) 26S subunit, ATPase 5                                                                                          |
| ---                                                                                                                                          |
| Proteasome (prosome, macropain) subunit, beta type 1                                                                                         |
| apolipoprotein A-II                                                                                                                          |
| Smg-5 homolog, nonsense mediated mRNA decay factor (C. elegans)                                                                              |
| prolyl 4-hydroxylase, beta polypeptide                                                                                                       |
| zinc finger protein 622                                                                                                                      |
| RIKEN cDNA 3110079O15 gene                                                                                                                   |
| ---                                                                                                                                          |
| ---                                                                                                                                          |
| antigen identified by monoclonal antibody Ki 67 /// similar to Antigen KI-67                                                                 |
| ---                                                                                                                                          |
| DEAD (Asp-Glu-Ala-Asp) box polypeptide 24                                                                                                    |
| Stathmin-like 3                                                                                                                              |
| SH3-binding domain glutamic acid-rich protein                                                                                                |
| ---                                                                                                                                          |
| RIKEN cDNA 4931406I20 gene                                                                                                                   |
| proteasome (prosome, macropain) 28 subunit, beta /// protease (prosome, macropain) 28 subunit beta B, pseudogene                             |
| SEC23B (S. cerevisiae)                                                                                                                       |
| ring finger protein 103                                                                                                                      |
| ---                                                                                                                                          |
| CWF19-like 1, cell cycle control (S. pombe)                                                                                                  |
| heparan sulfate (glucosamine) 3-O-sulfotransferase 3A1                                                                                       |

|                                                                                                                                                                                  |
|----------------------------------------------------------------------------------------------------------------------------------------------------------------------------------|
| Transcribed locus                                                                                                                                                                |
| lactate dehydrogenase B /// similar to L-lactate dehydrogenase B chain (LDH-B) (LDH heart subunit) (LDH-H)                                                                       |
| sorbin and SH3 domain containing 1                                                                                                                                               |
| arachidonate lipoxygenase, epidermal                                                                                                                                             |
| ---                                                                                                                                                                              |
| RIKEN cDNA 1500035H01 gene                                                                                                                                                       |
| splicing factor, arginine/serine-rich 14                                                                                                                                         |
| mitochondrial carrier triple repeat 1                                                                                                                                            |
| Ring finger protein 20                                                                                                                                                           |
| glycerophosphodiester phosphodiesterase domain containing 5                                                                                                                      |
| ---                                                                                                                                                                              |
| ---                                                                                                                                                                              |
| aldehyde dehydrogenase family 1, subfamily A1                                                                                                                                    |
| ---                                                                                                                                                                              |
| Eukaryotic translation elongation factor 1 gamma                                                                                                                                 |
| leucine rich repeat protein 1, neuronal                                                                                                                                          |
| dynein light chain LC8-type 2                                                                                                                                                    |
| Ribosomal protein L19                                                                                                                                                            |
| microfibrillar-associated protein 4                                                                                                                                              |
| RIKEN cDNA C330007P06 gene                                                                                                                                                       |
| protein kinase C, zeta                                                                                                                                                           |
| SWI/SNF related, matrix associated, actin dependent regulator of chromatin, subfamily d, member 2                                                                                |
| ectonucleoside triphosphate diphosphohydrolase 6                                                                                                                                 |
| ---                                                                                                                                                                              |
| chemokine (C-C motif) receptor 5                                                                                                                                                 |
| capping protein (actin filament), gelsolin-like                                                                                                                                  |
| 3-hydroxy-3-methylglutaryl-Coenzyme A lyase                                                                                                                                      |
| Bruton agammaglobulinemia tyrosine kinase                                                                                                                                        |
| solute carrier family 4 (anion exchanger), member 1                                                                                                                              |
| CDNA sequence BC053401                                                                                                                                                           |
| RIKEN cDNA 2810417H13 gene                                                                                                                                                       |
| phosphogluconate dehydrogenase                                                                                                                                                   |
| HIG1 domain family, member 1A                                                                                                                                                    |
| scinderin                                                                                                                                                                        |
| carnitine palmitoyltransferase 2                                                                                                                                                 |
| transmembrane protein 41B                                                                                                                                                        |
| Bcl2-associated athanogene 3                                                                                                                                                     |
| filaggrin /// similar to Filaggrin /// similar to Filaggrin                                                                                                                      |
| PTK2 protein tyrosine kinase 2                                                                                                                                                   |
| ribonuclease/angiogenin inhibitor 1                                                                                                                                              |
| procollagen, type III, alpha 1                                                                                                                                                   |
| kinectin 1                                                                                                                                                                       |
| glutathione peroxidase 5                                                                                                                                                         |
| prodynorphin                                                                                                                                                                     |
| low density lipoprotein receptor-related protein associated protein 1                                                                                                            |
| carnitine acetyltransferase                                                                                                                                                      |
| Diaphanous homolog 1 (Drosophila)                                                                                                                                                |
| ---                                                                                                                                                                              |
| protein phosphatase 1M                                                                                                                                                           |
| RIKEN cDNA 6330403K07 gene                                                                                                                                                       |
| protein inhibitor of activated STAT 3                                                                                                                                            |
| glutamate oxaloacetate transaminase 2, mitochondrial /// similar to Aspartate aminotransferase, mitochondrial precursor (Transaminase A) (Glutamate oxaloacetate transaminase 2) |
| ---                                                                                                                                                                              |

|                                                                                                                                        |
|----------------------------------------------------------------------------------------------------------------------------------------|
| ---                                                                                                                                    |
| N-myc downstream regulated gene 4                                                                                                      |
| ---                                                                                                                                    |
| ClpB caseinolytic peptidase B homolog (E. coli)                                                                                        |
| casein kinase 1, delta                                                                                                                 |
| ---                                                                                                                                    |
| ribosomal L1 domain containing 1                                                                                                       |
| Ligase I, DNA, ATP-dependent                                                                                                           |
| CDK5 regulatory subunit associated protein 3                                                                                           |
| inner membrane protein, mitochondrial                                                                                                  |
| Signal-induced proliferation associated gene 1                                                                                         |
| ---                                                                                                                                    |
| mutS homolog 2 (E. coli)                                                                                                               |
| activating transcription factor 2                                                                                                      |
| ras homolog gene family, member U                                                                                                      |
| CWF19-like 1, cell cycle control (S. pombe)                                                                                            |
| Mitochondrial ribosomal protein L48                                                                                                    |
| Tax1 (human T-cell leukemia virus type I) binding protein 3 /// similar to Tax1 (human T-cell leukemia virus type I) binding protein 3 |
| creatine kinase, mitochondrial 2                                                                                                       |
| forkhead box C2                                                                                                                        |
| Keratin associated protein 5-5                                                                                                         |
| crystallin, gamma E /// crystallin, gamma F                                                                                            |
| crystallin, beta B2                                                                                                                    |
| ---                                                                                                                                    |
| Bcl2-like 10                                                                                                                           |
| ---                                                                                                                                    |
| thrombomodulin                                                                                                                         |
| formin 1                                                                                                                               |
| ---                                                                                                                                    |
| U2 small nuclear ribonucleoprotein B /// similar to U2 small nuclear ribonucleoprotein B                                               |
| ---                                                                                                                                    |
| DNA segment, Chr 4, Wayne State University 114, expressed                                                                              |
| cDNA sequence BC038311                                                                                                                 |
| selenium binding protein 1 /// selenium binding protein 2                                                                              |
| galactose mutarotase                                                                                                                   |
| pyruvate kinase, muscle /// similar to Pyruvate kinase isozyme M2                                                                      |
| DNA segment, Chr 2, Wayne State University 81, expressed                                                                               |
| Anthrax toxin receptor 2                                                                                                               |
| Vav2 oncogene                                                                                                                          |
| DNA segment, Chr 4, Wayne State University 114, expressed                                                                              |
| neuropeptide Y receptor Y2                                                                                                             |
| galactose mutarotase                                                                                                                   |
| secretory carrier membrane protein 2                                                                                                   |
| ---                                                                                                                                    |
| mucin 13, epithelial transmembrane                                                                                                     |
| ---                                                                                                                                    |
| phospholipase D family, member 4                                                                                                       |
| cytochrome P450, family 4, subfamily b, polypeptide 1 /// similar to Cytochrome P450 4B1 (CYP1VB1)                                     |
| ---                                                                                                                                    |
| 5'-nucleotidase, cytosolic III-like                                                                                                    |
| ---                                                                                                                                    |
| ADP-ribosylation factor guanine nucleotide-exchange factor 1(brefeldin A-inhibited)                                                    |
| glycerophosphodiester phosphodiesterase domain containing 5                                                                            |

|                                                                                                                                                        |
|--------------------------------------------------------------------------------------------------------------------------------------------------------|
| F-box only protein 6b                                                                                                                                  |
| Seminal vesicle secretion 6                                                                                                                            |
| copper chaperone for superoxide dismutase                                                                                                              |
| protein tyrosine phosphatase, non-receptor type 5                                                                                                      |
| Small nuclear RNA activating complex, polypeptide 3                                                                                                    |
| small EDRK-rich factor 2                                                                                                                               |
| ---                                                                                                                                                    |
| Metadherin                                                                                                                                             |
| ---                                                                                                                                                    |
| ubiquitin specific peptidase 14                                                                                                                        |
| ligase III, DNA, ATP-dependent                                                                                                                         |
| protein phosphatase 2A, regulatory subunit B (PR 53)                                                                                                   |
| A disintegrin and metallopeptidase domain 2                                                                                                            |
| MAP kinase-activated protein kinase 5 /// a disintegrin and metallopeptidase domain 1a                                                                 |
| ---                                                                                                                                                    |
| dual specificity phosphatase 9                                                                                                                         |
| expressed sequence AA536749                                                                                                                            |
| RNA binding motif protein 14                                                                                                                           |
| embigin                                                                                                                                                |
| Hairy and enhancer of split 5 (Drosophila)                                                                                                             |
| Cytochrome P450, family 24, subfamily a, polypeptide 1                                                                                                 |
| uridine monophosphate synthetase                                                                                                                       |
| ---                                                                                                                                                    |
| Tuberous sclerosis 1                                                                                                                                   |
| ---                                                                                                                                                    |
| macrophage expressed gene 1 /// similar to macrophage expressed gene 1                                                                                 |
| glutamate receptor, ionotropic, AMPA2 (alpha 2)                                                                                                        |
| stearoyl-Coenzyme A desaturase 2                                                                                                                       |
| sorbitol dehydrogenase                                                                                                                                 |
| membrane bound C2 domain containing protein                                                                                                            |
| potassium channel tetramerisation domain containing 17                                                                                                 |
| ---                                                                                                                                                    |
| ---                                                                                                                                                    |
| N-terminal Asn amidase                                                                                                                                 |
| ---                                                                                                                                                    |
| RIKEN cDNA 2900086B20 gene                                                                                                                             |
| tripartite motif protein 30                                                                                                                            |
| potassium voltage-gated channel, shaker-related subfamily, beta member 1                                                                               |
| cofilin 2, muscle                                                                                                                                      |
| talin 1                                                                                                                                                |
| DNA segment, Chr 1, ERATO Doi 161, expressed                                                                                                           |
| Splicing factor 3b, subunit 2                                                                                                                          |
| inositol hexaphosphate kinase 1                                                                                                                        |
| Tyrosyl-tRNA synthetase                                                                                                                                |
| ---                                                                                                                                                    |
| growth arrest specific 7                                                                                                                               |
| ---                                                                                                                                                    |
| cadherin 3                                                                                                                                             |
| CDC91 cell division cycle 91-like 1 (S. cerevisiae)                                                                                                    |
| CD2 antigen (cytoplasmic tail) binding protein 2                                                                                                       |
| T-cell leukemia translocation altered gene                                                                                                             |
| myosin light chain, phosphorylatable, fast skeletal muscle /// similar to Myosin regulatory light chain 2, skeletal muscle isoform (G2) (DTNB) (MLC-2) |
| minichromosome maintenance deficient 5, cell division cycle 46 (S. cerevisiae)                                                                         |



|                                                                                                                  |
|------------------------------------------------------------------------------------------------------------------|
| procollagen, type IX, alpha 3                                                                                    |
| TAP binding protein                                                                                              |
| Zinc finger protein 93                                                                                           |
| keratin complex 1, acidic, gene 3                                                                                |
| ---                                                                                                              |
| salivary protein 1                                                                                               |
| SH3 domain containing ring finger 1                                                                              |
| vacuolar protein sorting 45 (yeast)                                                                              |
| cDNA sequence BC021395                                                                                           |
| calpain 2                                                                                                        |
| synaptobrevin like 1                                                                                             |
| Trf (TATA binding protein-related factor)-proximal protein homolog (Drosophila)                                  |
| FtsJ homolog 3 (E. coli)                                                                                         |
| Der1-like domain family, member 2                                                                                |
| placental specific protein 1                                                                                     |
| BTB (POZ) domain containing 14A                                                                                  |
| RIKEN cDNA 1500003O03 gene /// similar to calcium binding protein P22                                            |
| ---                                                                                                              |
| keratin complex 1, acidic, gene 10                                                                               |
| ferredoxin reductase                                                                                             |
| solute carrier family 19 (sodium/hydrogen exchanger), member 1                                                   |
| RUN and SH3 domain containing 1                                                                                  |
| ubiquitin C                                                                                                      |
| Hypothetical protein C130006E23                                                                                  |
| proliferation-associated 2G4                                                                                     |
| ---                                                                                                              |
| protein tyrosine phosphatase, receptor-type, F interacting protein, binding protein 2                            |
| sulfotransferase family 1A, phenol-preferring, member 1                                                          |
| ---                                                                                                              |
| ---                                                                                                              |
| sema domain, immunoglobulin domain (Ig), transmembrane domain (TM) and short cytoplasmic domain, (semaphorin) 4B |
| RIKEN cDNA 2010111101 gene                                                                                       |
| solute carrier family 38, member 2                                                                               |
| Thromboxane A synthase 1, platelet                                                                               |
| TXK tyrosine kinase                                                                                              |
| chromobox homolog 6                                                                                              |
| RIKEN cDNA 2310044H10 gene                                                                                       |
| DEAH (Asp-Glu-Ala-His) box polypeptide 30                                                                        |
| RAB2, member RAS oncogene family                                                                                 |
| proline-rich Gla (G-carboxyglutamic acid) polypeptide 2                                                          |
| protein-kinase, interferon-inducible double stranded RNA dependent inhibitor, repressor of (P58 repressor)       |
| electron transferring flavoprotein, beta polypeptide                                                             |
| phosphatidylglycerophosphate synthase 1                                                                          |
| RIKEN cDNA 4932416N17 gene                                                                                       |
| syntrophin, acidic 1                                                                                             |
| ---                                                                                                              |
| ---                                                                                                              |
| mannosidase 2, alpha B1                                                                                          |
| ---                                                                                                              |
| corticotropin releasing hormone receptor 2                                                                       |
| exosome component 5                                                                                              |
| SAM and SH3 domain containing 1                                                                                  |
| mutS homolog 3 (E. coli)                                                                                         |

|                                                                                                                                                                                                                                                                                                                                                                                                                                                                                                                                                                                                                                                                                                                                                                                                                                                                                                                                                                                                                                                                                                                                                                                                                                                                                                                                                                                                                                                                                                                                                                                                                                                                                                                                                                                                                                                                                                                                                                                                                                                                                       |
|---------------------------------------------------------------------------------------------------------------------------------------------------------------------------------------------------------------------------------------------------------------------------------------------------------------------------------------------------------------------------------------------------------------------------------------------------------------------------------------------------------------------------------------------------------------------------------------------------------------------------------------------------------------------------------------------------------------------------------------------------------------------------------------------------------------------------------------------------------------------------------------------------------------------------------------------------------------------------------------------------------------------------------------------------------------------------------------------------------------------------------------------------------------------------------------------------------------------------------------------------------------------------------------------------------------------------------------------------------------------------------------------------------------------------------------------------------------------------------------------------------------------------------------------------------------------------------------------------------------------------------------------------------------------------------------------------------------------------------------------------------------------------------------------------------------------------------------------------------------------------------------------------------------------------------------------------------------------------------------------------------------------------------------------------------------------------------------|
| sushi-repeat-containing protein                                                                                                                                                                                                                                                                                                                                                                                                                                                                                                                                                                                                                                                                                                                                                                                                                                                                                                                                                                                                                                                                                                                                                                                                                                                                                                                                                                                                                                                                                                                                                                                                                                                                                                                                                                                                                                                                                                                                                                                                                                                       |
| serine/threonine kinase 16                                                                                                                                                                                                                                                                                                                                                                                                                                                                                                                                                                                                                                                                                                                                                                                                                                                                                                                                                                                                                                                                                                                                                                                                                                                                                                                                                                                                                                                                                                                                                                                                                                                                                                                                                                                                                                                                                                                                                                                                                                                            |
| acyl-Coenzyme A oxidase 1, palmitoyl                                                                                                                                                                                                                                                                                                                                                                                                                                                                                                                                                                                                                                                                                                                                                                                                                                                                                                                                                                                                                                                                                                                                                                                                                                                                                                                                                                                                                                                                                                                                                                                                                                                                                                                                                                                                                                                                                                                                                                                                                                                  |
| transcription factor 2                                                                                                                                                                                                                                                                                                                                                                                                                                                                                                                                                                                                                                                                                                                                                                                                                                                                                                                                                                                                                                                                                                                                                                                                                                                                                                                                                                                                                                                                                                                                                                                                                                                                                                                                                                                                                                                                                                                                                                                                                                                                |
| insulin degrading enzyme                                                                                                                                                                                                                                                                                                                                                                                                                                                                                                                                                                                                                                                                                                                                                                                                                                                                                                                                                                                                                                                                                                                                                                                                                                                                                                                                                                                                                                                                                                                                                                                                                                                                                                                                                                                                                                                                                                                                                                                                                                                              |
| ---                                                                                                                                                                                                                                                                                                                                                                                                                                                                                                                                                                                                                                                                                                                                                                                                                                                                                                                                                                                                                                                                                                                                                                                                                                                                                                                                                                                                                                                                                                                                                                                                                                                                                                                                                                                                                                                                                                                                                                                                                                                                                   |
| RIKEN cDNA 2900006F19 gene                                                                                                                                                                                                                                                                                                                                                                                                                                                                                                                                                                                                                                                                                                                                                                                                                                                                                                                                                                                                                                                                                                                                                                                                                                                                                                                                                                                                                                                                                                                                                                                                                                                                                                                                                                                                                                                                                                                                                                                                                                                            |
| secretin                                                                                                                                                                                                                                                                                                                                                                                                                                                                                                                                                                                                                                                                                                                                                                                                                                                                                                                                                                                                                                                                                                                                                                                                                                                                                                                                                                                                                                                                                                                                                                                                                                                                                                                                                                                                                                                                                                                                                                                                                                                                              |
| actinin alpha 3                                                                                                                                                                                                                                                                                                                                                                                                                                                                                                                                                                                                                                                                                                                                                                                                                                                                                                                                                                                                                                                                                                                                                                                                                                                                                                                                                                                                                                                                                                                                                                                                                                                                                                                                                                                                                                                                                                                                                                                                                                                                       |
| RIKEN cDNA 2900092E17 gene                                                                                                                                                                                                                                                                                                                                                                                                                                                                                                                                                                                                                                                                                                                                                                                                                                                                                                                                                                                                                                                                                                                                                                                                                                                                                                                                                                                                                                                                                                                                                                                                                                                                                                                                                                                                                                                                                                                                                                                                                                                            |
| vesicular membrane protein p24                                                                                                                                                                                                                                                                                                                                                                                                                                                                                                                                                                                                                                                                                                                                                                                                                                                                                                                                                                                                                                                                                                                                                                                                                                                                                                                                                                                                                                                                                                                                                                                                                                                                                                                                                                                                                                                                                                                                                                                                                                                        |
| phosphodiesterase 6B, cGMP, rod receptor, beta polypeptide                                                                                                                                                                                                                                                                                                                                                                                                                                                                                                                                                                                                                                                                                                                                                                                                                                                                                                                                                                                                                                                                                                                                                                                                                                                                                                                                                                                                                                                                                                                                                                                                                                                                                                                                                                                                                                                                                                                                                                                                                            |
| 3-phosphoglycerate dehydrogenase /// similar to 3-phosphoglycerate dehydrogenase                                                                                                                                                                                                                                                                                                                                                                                                                                                                                                                                                                                                                                                                                                                                                                                                                                                                                                                                                                                                                                                                                                                                                                                                                                                                                                      |
| Histone 1, H2bp                                                                                                                                                                                                                                                                                                                                                                                                                                                                                                                                                                                                                                                                                                                                                                                                                                                                                                                                                                                                                                                                                                                                                                                                                                                                                                                                                                                                                                                                                                                                                                                                                                                                                                                                                                                                                                                                                                                                                                                                                                                                       |
| fibrillin 1                                                                                                                                                                                                                                                                                                                                                                                                                                                                                                                                                                                                                                                                                                                                                                                                                                                                                                                                                                                                                                                                                                                                                                                                                                                                                                                                                                                                                                                                                                                                                                                                                                                                                                                                                                                                                                                                                                                                                                                                                                                                           |
| fibroblast growth factor receptor 2                                                                                                                                                                                                                                                                                                                                                                                                                                                                                                                                                                                                                                                                                                                                                                                                                                                                                                                                                                                                                                                                                                                                                                                                                                                                                                                                                                                                                                                                                                                                                                                                                                                                                                                                                                                                                                                                                                                                                                                                                                                   |
| neural precursor cell expressed, developmentally down-regulted gene 4                                                                                                                                                                                                                                                                                                                                                                                                                                                                                                                                                                                                                                                                                                                                                                                                                                                                                                                                                                                                                                                                                                                                                                                                                                                                                                                                                                                                                                                                                                                                                                                                                                                                                                                                                                                                                                                                                                                                                                                                                 |
| ---                                                                                                                                                                                                                                                                                                                                                                                                                                                                                                                                                                                                                                                                                                                                                                                                                                                                                                                                                                                                                                                                                                                                                                                                                                                                                                                                                                                                                                                                                                                                                                                                                                                                                                                                                                                                                                                                                                                                                                                                                                                                                   |
| cytochrome P450, family 2, subfamily d, polypeptide 9                                                                                                                                                                                                                                                                                                                                                                                                                                                                                                                                                                                                                                                                                                                                                                                                                                                                                                                                                                                                                                                                                                                                                                                                                                                                                                                                                                                                                                                                                                                                                                                                                                                                                                                                                                                                                                                                                                                                                                                                                                 |
| defender against cell death 1                                                                                                                                                                                                                                                                                                                                                                                                                                                                                                                                                                                                                                                                                                                                                                                                                                                                                                                                                                                                                                                                                                                                                                                                                                                                                                                                                                                                                                                                                                                                                                                                                                                                                                                                                                                                                                                                                                                                                                                                                                                         |
| similar to glyceraldehyde-3-phosphate dehydrogenase /// similar to glyceraldehyde-3-phosphate dehydrogenase (phosphorylating)-like /// similar to Glyceraldehyde-3-phosphate dehydrogenase (GAPDH) (38 kDa BFA-dependent ADP-ribosylation substrate) (BARS-38) /// similar to glyceraldehyde-3-phosphate dehydrogenase /// cDNA sequence AK190093 /// similar to glyceraldehyde-3-phosphate dehydrogenase /// similar to Glyceraldehyde-3-phosphate dehydrogenase (GAPDH) (38 kDa BFA-dependent ADP-ribosylation substrate) (BARS-38) /// glyceraldehyde-3-phosphate dehydrogenase /// similar to Glyceraldehyde-3-phosphate dehydrogenase (GAPDH) /// hypothetical protein LOC671520 /// similar to Glyceraldehyde-3-phosphate dehydrogenase (GAPDH) |
| ribosomal protein L3 /// similar to 60S ribosomal protein L3 (J1 protein) /// similar to 60S ribosomal protein L3 (L4) /// similar to 60S ribosomal protein L3 (J1 protein) /// similar to 60S ribosomal protein L3 (L4) /// similar to ribosomal protein L3 isoform b /// similar to 60S ribosomal protein L3 (J1 protein) /// similar to 60S ribosomal protein L3 (J1 protein) /// similar to 60S ribosomal protein L3 (J1 protein) /// similar to 60S ribosomal protein L3 (J1 protein) /// similar to ribosomal protein L3 isoform b                                                                                                                                                                                                                                                                                                                                                                                                                                                                                                                                                                                                                                                                                                                                                                                                                                                                                                                                                                                                                                                                                                                                                                                                                                                                                                                                                                                                                                                                                                                                              |
| ---                                                                                                                                                                                                                                                                                                                                                                                                                                                                                                                                                                                                                                                                                                                                                                                                                                                                                                                                                                                                                                                                                                                                                                                                                                                                                                                                                                                                                                                                                                                                                                                                                                                                                                                                                                                                                                                                                                                                                                                                                                                                                   |
| Bleomycin hydrolase                                                                                                                                                                                                                                                                                                                                                                                                                                                                                                                                                                                                                                                                                                                                                                                                                                                                                                                                                                                                                                                                                                                                                                                                                                                                                                                                                                                                                                                                                                                                                                                                                                                                                                                                                                                                                                                                                                                                                                                                                                                                   |
| ---                                                                                                                                                                                                                                                                                                                                                                                                                                                                                                                                                                                                                                                                                                                                                                                                                                                                                                                                                                                                                                                                                                                                                                                                                                                                                                                                                                                                                                                                                                                                                                                                                                                                                                                                                                                                                                                                                                                                                                                                                                                                                   |
| Fc receptor, IgE, high affinity I, gamma polypeptide                                                                                                                                                                                                                                                                                                                                                                                                                                                                                                                                                                                                                                                                                                                                                                                                                                                                                                                                                                                                                                                                                                                                                                                                                                                                                                                                                                                                                                                                                                                                                                                                                                                                                                                                                                                                                                                                                                                                                                                                                                  |
| potassium voltage-gated channel, shaker-related subfamily, beta member 2                                                                                                                                                                                                                                                                                                                                                                                                                                                                                                                                                                                                                                                                                                                                                                                                                                                                                                                                                                                                                                                                                                                                                                                                                                                                                                                                                                                                                                                                                                                                                                                                                                                                                                                                                                                                                                                                                                                                                                                                              |
| RIKEN cDNA C630002B14 gene                                                                                                                                                                                                                                                                                                                                                                                                                                                                                                                                                                                                                                                                                                                                                                                                                                                                                                                                                                                                                                                                                                                                                                                                                                                                                                                                                                                                                                                                                                                                                                                                                                                                                                                                                                                                                                                                                                                                                                                                                                                            |
| galactose mutarotase                                                                                                                                                                                                                                                                                                                                                                                                                                                                                                                                                                                                                                                                                                                                                                                                                                                                                                                                                                                                                                                                                                                                                                                                                                                                                                                                                                                                                                                                                                                                                                                                                                                                                                                                                                                                                                                                                                                                                                                                                                                                  |
| polymerase (DNA-directed), delta interacting protein 3                                                                                                                                                                                                                                                                                                                                                                                                                                                                                                                                                                                                                                                                                                                                                                                                                                                                                                                                                                                                                                                                                                                                                                                                                                                                                                                                                                                                                                                                                                                                                                                                                                                                                                                                                                                                                                                                                                                                                                                                                                |
| Meprin 1 beta                                                                                                                                                                                                                                                                                                                                                                                                                                                                                                                                                                                                                                                                                                                                                                                                                                                                                                                                                                                                                                                                                                                                                                                                                                                                                                                                                                                                                                                                                                                                                                                                                                                                                                                                                                                                                                                                                                                                                                                                                                                                         |
| regenerating islet-derived 3 gamma                                                                                                                                                                                                                                                                                                                                                                                                                                                                                                                                                                                                                                                                                                                                                                                                                                                                                                                                                                                                                                                                                                                                                                                                                                                                                                                                                                                                                                                                                                                                                                                                                                                                                                                                                                                                                                                                                                                                                                                                                                                    |
| procollagen-proline, 2-oxoglutarate 4-dioxygenase (proline 4-hydroxylase), alpha II polypeptide                                                                                                                                                                                                                                                                                                                                                                                                                                                                                                                                                                                                                                                                                                                                                                                                                                                                                                                                                                                                                                                                                                                                                                                                                                                                                                                                                                                                                                                                                                                                                                                                                                                                                                                                                                                                                                                                                                                                                                                       |
| ---                                                                                                                                                                                                                                                                                                                                                                                                                                                                                                                                                                                                                                                                                                                                                                                                                                                                                                                                                                                                                                                                                                                                                                                                                                                                                                                                                                                                                                                                                                                                                                                                                                                                                                                                                                                                                                                                                                                                                                                                                                                                                   |
| limb region 1 like                                                                                                                                                                                                                                                                                                                                                                                                                                                                                                                                                                                                                                                                                                                                                                                                                                                                                                                                                                                                                                                                                                                                                                                                                                                                                                                                                                                                                                                                                                                                                                                                                                                                                                                                                                                                                                                                                                                                                                                                                                                                    |
| keratin complex 1, acidic, gene 18 /// hypothetical LOC382807                                                                                                                                                                                                                                                                                                                                                                                                                                                                                                                                                                                                                                                                                                                                                                                                                                                                                                                                                                                                                                                                                                                                                                                                                                                                                                                                                                                                                                                                                                                                                                                                                                                                                                                                                                                                                                                                                                                                                                                                                         |
| chromogranin A                                                                                                                                                                                                                                                                                                                                                                                                                                                                                                                                                                                                                                                                                                                                                                                                                                                                                                                                                                                                                                                                                                                                                                                                                                                                                                                                                                                                                                                                                                                                                                                                                                                                                                                                                                                                                                                                                                                                                                                                                                                                        |
| integrin beta 7                                                                                                                                                                                                                                                                                                                                                                                                                                                                                                                                                                                                                                                                                                                                                                                                                                                                                                                                                                                                                                                                                                                                                                                                                                                                                                                                                                                                                                                                                                                                                                                                                                                                                                                                                                                                                                                                                                                                                                                                                                                                       |

|                                                                                                                                                                                                                                                                                                                                                                                                                                                                                                                                                              |
|--------------------------------------------------------------------------------------------------------------------------------------------------------------------------------------------------------------------------------------------------------------------------------------------------------------------------------------------------------------------------------------------------------------------------------------------------------------------------------------------------------------------------------------------------------------|
| plakophilin 2                                                                                                                                                                                                                                                                                                                                                                                                                                                                                                                                                |
| ---                                                                                                                                                                                                                                                                                                                                                                                                                                                                                                                                                          |
| CUB and zona pellucida-like domains 1                                                                                                                                                                                                                                                                                                                                                                                                                                                                                                                        |
| IMP4, U3 small nucleolar ribonucleoprotein, homolog (yeast)                                                                                                                                                                                                                                                                                                                                                                                                                                                                                                  |
| ---                                                                                                                                                                                                                                                                                                                                                                                                                                                                                                                                                          |
| mast cell protease 8                                                                                                                                                                                                                                                                                                                                                                                                                                                                                                                                         |
| anterior gradient 2 (Xenopus laevis)                                                                                                                                                                                                                                                                                                                                                                                                                                                                                                                         |
| ---                                                                                                                                                                                                                                                                                                                                                                                                                                                                                                                                                          |
| interferon regulatory factor 7                                                                                                                                                                                                                                                                                                                                                                                                                                                                                                                               |
| RIKEN cDNA D030051N19 gene                                                                                                                                                                                                                                                                                                                                                                                                                                                                                                                                   |
| Notch gene homolog 1 (Drosophila)                                                                                                                                                                                                                                                                                                                                                                                                                                                                                                                            |
| protease, serine, 32                                                                                                                                                                                                                                                                                                                                                                                                                                                                                                                                         |
| suppressor of cytokine signaling 3                                                                                                                                                                                                                                                                                                                                                                                                                                                                                                                           |
| Chloride channel 7                                                                                                                                                                                                                                                                                                                                                                                                                                                                                                                                           |
| pre-B lymphocyte gene 3                                                                                                                                                                                                                                                                                                                                                                                                                                                                                                                                      |
| protein tyrosine phosphatase, receptor type, R                                                                                                                                                                                                                                                                                                                                                                                                                                                                                                               |
| ---                                                                                                                                                                                                                                                                                                                                                                                                                                                                                                                                                          |
| cDNA sequence BC052328                                                                                                                                                                                                                                                                                                                                                                                                                                                                                                                                       |
| ---                                                                                                                                                                                                                                                                                                                                                                                                                                                                                                                                                          |
| transmembrane BAX inhibitor motif containing 1                                                                                                                                                                                                                                                                                                                                                                                                                                                                                                               |
| keratin complex 1, acidic, gene 2                                                                                                                                                                                                                                                                                                                                                                                                                                                                                                                            |
| syndecan 2                                                                                                                                                                                                                                                                                                                                                                                                                                                                                                                                                   |
| lymphocyte antigen 6 complex, locus D                                                                                                                                                                                                                                                                                                                                                                                                                                                                                                                        |
| farnesyl diphosphate synthetase /// similar to farnesyl diphosphate synthetase /// similar to farnesyl diphosphate synthetase                                                                                                                                                                                                                                                                                                                                                                                                                                |
| integrin beta 5                                                                                                                                                                                                                                                                                                                                                                                                                                                                                                                                              |
| Transcribed locus                                                                                                                                                                                                                                                                                                                                                                                                                                                                                                                                            |
| DnaJ (Hsp40) related, subfamily B, member 13                                                                                                                                                                                                                                                                                                                                                                                                                                                                                                                 |
| bleomycin hydrolase                                                                                                                                                                                                                                                                                                                                                                                                                                                                                                                                          |
| eukaryotic translation initiation factor 4E /// hypothetical LOC630527                                                                                                                                                                                                                                                                                                                                                                                                                                                                                       |
| ATPase, Ca++ transporting, cardiac muscle, fast twitch 1                                                                                                                                                                                                                                                                                                                                                                                                                                                                                                     |
| amyloid beta (A4) precursor-like protein 2                                                                                                                                                                                                                                                                                                                                                                                                                                                                                                                   |
| ---                                                                                                                                                                                                                                                                                                                                                                                                                                                                                                                                                          |
| transmembrane 9 superfamily member 3                                                                                                                                                                                                                                                                                                                                                                                                                                                                                                                         |
| Uracil DNA glycosylase                                                                                                                                                                                                                                                                                                                                                                                                                                                                                                                                       |
| START domain containing 3                                                                                                                                                                                                                                                                                                                                                                                                                                                                                                                                    |
| Transcribed locus, strongly similar to XP_537399.1 PREDICTED: similar to 40S ribosomal protein S4, X isoform [Canis familiaris]                                                                                                                                                                                                                                                                                                                                                                                                                              |
| retinoblastoma binding protein 9 /// similar to Retinoblastoma-binding protein 9 (RBBP-9) (B5T overexpressed gene protein) (Bog protein)                                                                                                                                                                                                                                                                                                                                                                                                                     |
| mesoderm development candiate 2                                                                                                                                                                                                                                                                                                                                                                                                                                                                                                                              |
| RAD51 homolog (S. cerevisiae)                                                                                                                                                                                                                                                                                                                                                                                                                                                                                                                                |
| solute carrier family 38, member 2                                                                                                                                                                                                                                                                                                                                                                                                                                                                                                                           |
| chemokine (C-X-C motif) ligand 12                                                                                                                                                                                                                                                                                                                                                                                                                                                                                                                            |
| PRP19/PSO4 pre-mRNA processing factor 19 homolog (S. cerevisiae)                                                                                                                                                                                                                                                                                                                                                                                                                                                                                             |
| nasal embryonic LHRH factor                                                                                                                                                                                                                                                                                                                                                                                                                                                                                                                                  |
| Secretogranin III                                                                                                                                                                                                                                                                                                                                                                                                                                                                                                                                            |
| Sh3kbp1 binding protein 1                                                                                                                                                                                                                                                                                                                                                                                                                                                                                                                                    |
| RIKEN cDNA 4933407C03 gene                                                                                                                                                                                                                                                                                                                                                                                                                                                                                                                                   |
| ---                                                                                                                                                                                                                                                                                                                                                                                                                                                                                                                                                          |
| G protein-coupled receptor 178                                                                                                                                                                                                                                                                                                                                                                                                                                                                                                                               |
| ---                                                                                                                                                                                                                                                                                                                                                                                                                                                                                                                                                          |
| rhotekin                                                                                                                                                                                                                                                                                                                                                                                                                                                                                                                                                     |
| ribosomal protein S4, X-linked /// similar to 40S ribosomal protein S4, X isoform /// similar to 40S ribosomal protein S4, X isoform /// similar to 40S ribosomal protein S4, X isoform /// similar to 40S ribosomal protein S4, X isoform /// similar to 40S ribosomal protein S4, X isoform /// similar to 40S ribosomal protein S4, X isoform /// similar to 40S ribosomal protein S4, X isoform /// similar to 40S ribosomal protein S4, X isoform /// similar to 40S ribosomal protein S4, X isoform /// similar to 40S ribosomal protein S4, X isoform |
| myosin VI                                                                                                                                                                                                                                                                                                                                                                                                                                                                                                                                                    |

|                                                                                                                                             |
|---------------------------------------------------------------------------------------------------------------------------------------------|
| glutathione synthetase                                                                                                                      |
| Transcription elongation factor A (SII), 2                                                                                                  |
| biphenyl hydrolase-like (serine hydrolase, breast epithelial mucin-associated antigen)                                                      |
| RIKEN cDNA 2610200G18 gene                                                                                                                  |
| Zinc finger, CCHC domain containing 6                                                                                                       |
| centaurin, gamma 2                                                                                                                          |
| pleckstrin homology domain containing, family A (phosphoinositide binding specific) member 1                                                |
| fibroblast growth factor receptor 3                                                                                                         |
| cytochrome b5 reductase 1                                                                                                                   |
| sodium channel, voltage-gated, type I, alpha                                                                                                |
| CWF19-like 1, cell cycle control (S. pombe)                                                                                                 |
| ---                                                                                                                                         |
| ---                                                                                                                                         |
| flavin containing monooxygenase 5                                                                                                           |
| RIKEN cDNA 6330407G11 gene                                                                                                                  |
| Zona pellucida glycoprotein 2                                                                                                               |
| glycogenin                                                                                                                                  |
| laminin B1 subunit 1                                                                                                                        |
| budding uninhibited by benzimidazoles 1 homolog (S. cerevisiae)                                                                             |
| Kruppel-like factor 17                                                                                                                      |
| ---                                                                                                                                         |
| phosducin                                                                                                                                   |
| crystallin, gamma D                                                                                                                         |
| SET and MYND domain containing 2                                                                                                            |
| Bcl2-associated athanogene 2                                                                                                                |
| cathepsin B                                                                                                                                 |
| syntaxin binding protein 2                                                                                                                  |
| Replication initiator 1                                                                                                                     |
| lipolysis stimulated lipoprotein receptor                                                                                                   |
| UPF3 regulator of nonsense transcripts homolog B (yeast)                                                                                    |
| complement component 1, q subcomponent, beta polypeptide                                                                                    |
| polymerase (DNA directed), gamma 2, accessory subunit                                                                                       |
| transporter 1, ATP-binding cassette, sub-family B (MDR/TAP)                                                                                 |
| Chaperonin subunit 6a (zeta)                                                                                                                |
| NADH dehydrogenase (ubiquinone) 1 beta subcomplex, 10                                                                                       |
| farnesyl diphosphate synthetase /// similar to farnesyl diphosphate synthetase /// similar to farnesyl diphosphate synthetase               |
| TYRO3 protein tyrosine kinase 3                                                                                                             |
| eukaryotic translation initiation factor 3, subunit 6 interacting protein                                                                   |
| solute carrier family 39 (zinc transporter), member 4                                                                                       |
| solute carrier family 44, member 4                                                                                                          |
| Fc fragment of IgG binding protein                                                                                                          |
| chloride channel calcium activated 3                                                                                                        |
| pyruvate carboxylase                                                                                                                        |
| fibrinogen-like protein 2                                                                                                                   |
| ---                                                                                                                                         |
| RIKEN cDNA 8430437G11 gene                                                                                                                  |
| ---                                                                                                                                         |
| ---                                                                                                                                         |
| monoamine oxidase A                                                                                                                         |
| ---                                                                                                                                         |
| bone gamma-carboxyglutamate protein, related sequence 1 /// bone gamma carboxyglutamate protein 1 /// bone gamma-carboxyglutamate protein 2 |
| caveolin 3                                                                                                                                  |
| tight junction protein 1                                                                                                                    |

|                                                                                                                                                                                                                                                                                                                      |
|----------------------------------------------------------------------------------------------------------------------------------------------------------------------------------------------------------------------------------------------------------------------------------------------------------------------|
| phosphatidylethanolamine binding protein 1                                                                                                                                                                                                                                                                           |
| Purkinje cell protein 4                                                                                                                                                                                                                                                                                              |
| RIKEN cDNA 2310016M24 gene                                                                                                                                                                                                                                                                                           |
| folate receptor 1 (adult)                                                                                                                                                                                                                                                                                            |
| prolactin-like protein F                                                                                                                                                                                                                                                                                             |
| PHD finger protein 7                                                                                                                                                                                                                                                                                                 |
| kallikrein 1-related peptidase b9 /// kallikrein 1-related peptidase b1                                                                                                                                                                                                                                              |
| UBX domain containing 5                                                                                                                                                                                                                                                                                              |
| polymerase (DNA directed), kappa                                                                                                                                                                                                                                                                                     |
| crystallin, alpha B                                                                                                                                                                                                                                                                                                  |
| lysozyme /// P lysozyme structural                                                                                                                                                                                                                                                                                   |
| RIKEN cDNA G630024C07 gene                                                                                                                                                                                                                                                                                           |
| ---                                                                                                                                                                                                                                                                                                                  |
| regenerating islet-derived 1                                                                                                                                                                                                                                                                                         |
| ---                                                                                                                                                                                                                                                                                                                  |
| CCR4-NOT transcription complex, subunit 7                                                                                                                                                                                                                                                                            |
| claudin 3                                                                                                                                                                                                                                                                                                            |
| diacylglycerol O-acyltransferase 1                                                                                                                                                                                                                                                                                   |
| ---                                                                                                                                                                                                                                                                                                                  |
| ---                                                                                                                                                                                                                                                                                                                  |
| ---                                                                                                                                                                                                                                                                                                                  |
| ---                                                                                                                                                                                                                                                                                                                  |
| BarH-like homeobox 1                                                                                                                                                                                                                                                                                                 |
| Keratin complex 1, acidic, gene 13                                                                                                                                                                                                                                                                                   |
| NADH dehydrogenase (ubiquinone) 1 beta subcomplex, 7                                                                                                                                                                                                                                                                 |
| ---                                                                                                                                                                                                                                                                                                                  |
| troponin C2, fast                                                                                                                                                                                                                                                                                                    |
| ---                                                                                                                                                                                                                                                                                                                  |
| NADH dehydrogenase (ubiquinone) flavoprotein 2                                                                                                                                                                                                                                                                       |
| keratin complex 2, basic, gene 16                                                                                                                                                                                                                                                                                    |
| secretory leukocyte peptidase inhibitor                                                                                                                                                                                                                                                                              |
| ---                                                                                                                                                                                                                                                                                                                  |
| aldehyde dehydrogenase family 3, subfamily A1                                                                                                                                                                                                                                                                        |
| microtubule-associated protein, RP/EB family, member 3                                                                                                                                                                                                                                                               |
| secretory leukocyte peptidase inhibitor                                                                                                                                                                                                                                                                              |
| Lethal giant larvae homolog 1 (Drosophila)                                                                                                                                                                                                                                                                           |
| ribosomal protein S29 /// similar to 40S ribosomal protein S29 |
| Acid phosphatase 6, lysophosphatidic                                                                                                                                                                                                                                                                                 |
| Asparagine-linked glycosylation 3 homolog (yeast, alpha-1,3-mannosyltransferase)                                                                                                                                                                                                                                     |
| ---                                                                                                                                                                                                                                                                                                                  |
| cell division cycle 34 homolog (S. cerevisiae)                                                                                                                                                                                                                                                                       |
| S100 calcium binding protein A10 (calpactin)                                                                                                                                                                                                                                                                         |
| aldo-keto reductase family 1, member B3 (aldose reductase)                                                                                                                                                                                                                                                           |
| Fatty acid binding protein 1, liver                                                                                                                                                                                                                                                                                  |
| ATP synthase, H+ transporting, mitochondrial F1 complex, delta subunit                                                                                                                                                                                                                                               |
| ---                                                                                                                                                                                                                                                                                                                  |
| RIKEN cDNA 1110059E24 gene                                                                                                                                                                                                                                                                                           |
| histocompatibility 2, class II, locus DMA                                                                                                                                                                                                                                                                            |
| biglycan                                                                                                                                                                                                                                                                                                             |
| carboxypeptidase A3, mast cell                                                                                                                                                                                                                                                                                       |
| ---                                                                                                                                                                                                                                                                                                                  |
| RIKEN cDNA D330001F17 gene                                                                                                                                                                                                                                                                                           |
| copper chaperone for superoxide dismutase                                                                                                                                                                                                                                                                            |

|                                                                                                                                                                         |
|-------------------------------------------------------------------------------------------------------------------------------------------------------------------------|
| reprimo, TP53 dependent G2 arrest mediator candidate                                                                                                                    |
| ---                                                                                                                                                                     |
| insulin-like growth factor binding protein-like 1                                                                                                                       |
| ---                                                                                                                                                                     |
| RIKEN cDNA 1810042K04 gene                                                                                                                                              |
| Epstein-Barr virus induced gene 3                                                                                                                                       |
| solute carrier family 25 (mitochondrial carrier, citrate transporter), member 1                                                                                         |
| G kinase anchoring protein 1                                                                                                                                            |
| RIKEN cDNA 1110061O04 gene                                                                                                                                              |
| serine dehydratase-like                                                                                                                                                 |
| tenascin C                                                                                                                                                              |
| ---                                                                                                                                                                     |
| glutamase 1                                                                                                                                                             |
| ---                                                                                                                                                                     |
| complement component 2 (within H-2S)                                                                                                                                    |
| SEH1-like (S. cerevisiae)                                                                                                                                               |
| ---                                                                                                                                                                     |
| matrix metallopeptidase 9                                                                                                                                               |
| ---                                                                                                                                                                     |
| Eph receptor B6                                                                                                                                                         |
| avian reticuloendotheliosis viral (v-rel) oncogene related B                                                                                                            |
| SH3-domain binding protein 2                                                                                                                                            |
| myosin, heavy polypeptide 8, skeletal muscle, perinatal                                                                                                                 |
| keratin complex 2, basic, gene 19                                                                                                                                       |
| ---                                                                                                                                                                     |
| single stranded DNA binding protein 4                                                                                                                                   |
| RIKEN cDNA 8430437G11 gene                                                                                                                                              |
| ---                                                                                                                                                                     |
| hypothetical protein LOC637741                                                                                                                                          |
| Sphingosine kinase 2                                                                                                                                                    |
| copper chaperone for superoxide dismutase                                                                                                                               |
| ---                                                                                                                                                                     |
| CCR4 carbon catabolite repression 4-like (S. cerevisiae)                                                                                                                |
| solute carrier family 2 (facilitated glucose transporter), member 4                                                                                                     |
| ---                                                                                                                                                                     |
| mitofusin 1                                                                                                                                                             |
| a disintegrin and metallopeptidase domain 5                                                                                                                             |
| DNA segment, Chr 14, ERATO Doi 209, expressed                                                                                                                           |
| complement component 4B (Chido blood group) /// complement component 4A (Rodgers blood group) /// similar to sex-limited protein /// similar to Complement C4 precursor |
| leukotriene C4 synthase                                                                                                                                                 |
| intraflagellar transport 88 homolog (Chlamydomonas)                                                                                                                     |
| ---                                                                                                                                                                     |
| Janus kinase 3                                                                                                                                                          |
| ---                                                                                                                                                                     |
| ---                                                                                                                                                                     |
| polypyrimidine tract binding protein 1                                                                                                                                  |
| ---                                                                                                                                                                     |
| ataxin 2                                                                                                                                                                |
| MMS19 (MET18 S. cerevisiae)-like                                                                                                                                        |
| myo-inositol 1-phosphate synthase A1                                                                                                                                    |
| homeo box A4                                                                                                                                                            |
| ---                                                                                                                                                                     |
| ---                                                                                                                                                                     |

|                                                                                                                                                                      |
|----------------------------------------------------------------------------------------------------------------------------------------------------------------------|
| RIKEN cDNA 2810449G22 gene                                                                                                                                           |
| serine/threonine kinase 38                                                                                                                                           |
| TRAF-interacting protein                                                                                                                                             |
| interleukin 12 receptor, beta 1                                                                                                                                      |
| zinc finger, matrin-like                                                                                                                                             |
| CD8 antigen, beta chain 1                                                                                                                                            |
| myeloblastosis oncogene                                                                                                                                              |
| ---                                                                                                                                                                  |
| nuclear receptor subfamily 0, group B, member 1                                                                                                                      |
| FK506 binding protein 10                                                                                                                                             |
| calcium activated nucleotidase 1                                                                                                                                     |
| cell division cycle associated 4                                                                                                                                     |
| RIKEN cDNA 1500001M20 gene                                                                                                                                           |
| ATPase family, AAA domain containing 3A                                                                                                                              |
| ---                                                                                                                                                                  |
| selenoprotein K                                                                                                                                                      |
| cytotoxic T lymphocyte-associated protein 2 alpha                                                                                                                    |
| ---                                                                                                                                                                  |
| neighbor of Brca1 gene 1                                                                                                                                             |
| DEAD (Asp-Glu-Ala-Asp) box polypeptide 17                                                                                                                            |
| interferon regulatory factor 3                                                                                                                                       |
| secretory carrier membrane protein 1                                                                                                                                 |
| EF hand domain containing 2                                                                                                                                          |
| S100 calcium binding protein A14                                                                                                                                     |
| serine (or cysteine) peptidase inhibitor, clade F, member 1                                                                                                          |
| ---                                                                                                                                                                  |
| ---                                                                                                                                                                  |
| monoacylglycerol O-acyltransferase 2                                                                                                                                 |
| nucleolar protein 5A /// hypothetical gene supported by AK037405; NM_024193 /// similar to Nucleolar protein Nop56 (Nucleolar protein 5A) /// hypothetical LOC639387 |
| ---                                                                                                                                                                  |
| fasciculation and elongation protein zeta 1 (zygin I)                                                                                                                |
| mitochondrial ribosomal protein L46                                                                                                                                  |
| ---                                                                                                                                                                  |
| DNA segment, Chr 15, Wayne State University 75, expressed                                                                                                            |
| POU domain, class 2, associating factor 1                                                                                                                            |
| ---                                                                                                                                                                  |
| glucosidase, alpha, acid                                                                                                                                             |
| ---                                                                                                                                                                  |
| t-complex protein 1                                                                                                                                                  |
| Terf1 (TRF1)-interacting nuclear factor 2                                                                                                                            |
| ---                                                                                                                                                                  |
| checkpoint with forkhead and ring finger domains                                                                                                                     |
| Major vault protein                                                                                                                                                  |
| heat shock protein 8                                                                                                                                                 |
| Adrenomedullin receptor                                                                                                                                              |
| insulin-like growth factor binding protein, acid labile subunit                                                                                                      |
| F-box only protein 3                                                                                                                                                 |
| Purkinje cell protein 2 (L7)                                                                                                                                         |
| ---                                                                                                                                                                  |
| ---                                                                                                                                                                  |
| RIKEN cDNA 1110039B18 gene                                                                                                                                           |
| kallikrein 1-related peptidase b21 /// kallikrein 1-related peptidase b24                                                                                            |
| hemoglobin alpha, adult chain 1                                                                                                                                      |

|                                                                                                                                                                                                                                                                                                                                                                                                                                                        |
|--------------------------------------------------------------------------------------------------------------------------------------------------------------------------------------------------------------------------------------------------------------------------------------------------------------------------------------------------------------------------------------------------------------------------------------------------------|
| serine hydroxymethyl transferase 2 (mitochondrial)                                                                                                                                                                                                                                                                                                                                                                                                     |
| procollagen, type VI, alpha 1                                                                                                                                                                                                                                                                                                                                                                                                                          |
| immunoglobulin (CD79A) binding protein 1                                                                                                                                                                                                                                                                                                                                                                                                               |
| ---                                                                                                                                                                                                                                                                                                                                                                                                                                                    |
| phosphoenolpyruvate carboxykinase 2 (mitochondrial)                                                                                                                                                                                                                                                                                                                                                                                                    |
| tumor protein D52                                                                                                                                                                                                                                                                                                                                                                                                                                      |
| Pancreatic polypeptide                                                                                                                                                                                                                                                                                                                                                                                                                                 |
| kelch domain containing 4                                                                                                                                                                                                                                                                                                                                                                                                                              |
| anaphase promoting complex subunit 13                                                                                                                                                                                                                                                                                                                                                                                                                  |
| RIKEN cDNA 2700078K21 gene                                                                                                                                                                                                                                                                                                                                                                                                                             |
| ras homolog gene family, member C                                                                                                                                                                                                                                                                                                                                                                                                                      |
| cytochrome c-1                                                                                                                                                                                                                                                                                                                                                                                                                                         |
| ---                                                                                                                                                                                                                                                                                                                                                                                                                                                    |
| RIKEN cDNA 1110019N10 gene                                                                                                                                                                                                                                                                                                                                                                                                                             |
| gastrin                                                                                                                                                                                                                                                                                                                                                                                                                                                |
| NADH dehydrogenase (ubiquinone) 1 beta subcomplex, 2                                                                                                                                                                                                                                                                                                                                                                                                   |
| ---                                                                                                                                                                                                                                                                                                                                                                                                                                                    |
| peptidoglycan recognition protein 1                                                                                                                                                                                                                                                                                                                                                                                                                    |
| ---                                                                                                                                                                                                                                                                                                                                                                                                                                                    |
| signal recognition particle 14                                                                                                                                                                                                                                                                                                                                                                                                                         |
| isocitrate dehydrogenase 3 (NAD+), gamma                                                                                                                                                                                                                                                                                                                                                                                                               |
| ---                                                                                                                                                                                                                                                                                                                                                                                                                                                    |
| left right determination factor 1                                                                                                                                                                                                                                                                                                                                                                                                                      |
| arrestin, beta 1                                                                                                                                                                                                                                                                                                                                                                                                                                       |
| ---                                                                                                                                                                                                                                                                                                                                                                                                                                                    |
| Procollagen, type XVIII, alpha 1                                                                                                                                                                                                                                                                                                                                                                                                                       |
| transmembrane emp24 domain containing 1                                                                                                                                                                                                                                                                                                                                                                                                                |
| zinc finger protein 91                                                                                                                                                                                                                                                                                                                                                                                                                                 |
| Down syndrome critical region gene 3                                                                                                                                                                                                                                                                                                                                                                                                                   |
| C1q and tumor necrosis factor related protein 1                                                                                                                                                                                                                                                                                                                                                                                                        |
| hexosaminidase A                                                                                                                                                                                                                                                                                                                                                                                                                                       |
| DEAD (Asp-Glu-Ala-Asp) box polypeptide 47                                                                                                                                                                                                                                                                                                                                                                                                              |
| Programmed cell death 6                                                                                                                                                                                                                                                                                                                                                                                                                                |
| proline-rich polypeptide 6                                                                                                                                                                                                                                                                                                                                                                                                                             |
| zinc finger proliferation 1                                                                                                                                                                                                                                                                                                                                                                                                                            |
| ---                                                                                                                                                                                                                                                                                                                                                                                                                                                    |
| PDZ and LIM domain 4                                                                                                                                                                                                                                                                                                                                                                                                                                   |
| Blocked early in transport 1 homolog (S. cerevisiae)                                                                                                                                                                                                                                                                                                                                                                                                   |
| ---                                                                                                                                                                                                                                                                                                                                                                                                                                                    |
| ubiquitin-activating enzyme E1, Chr X                                                                                                                                                                                                                                                                                                                                                                                                                  |
| ribosomal protein S4, X-linked /// similar to 40S ribosomal protein S4, X isoform /// similar to 40S ribosomal protein S4, X isoform /// similar to 40S ribosomal protein S4, X isoform /// similar to 40S ribosomal protein S4, X isoform /// similar to 40S ribosomal protein S4, X isoform /// similar to 40S ribosomal protein S4, X isoform /// similar to 40S ribosomal protein S4, X isoform /// similar to 40S ribosomal protein S4, X isoform |
| ubiquitin-conjugating enzyme E2D 2                                                                                                                                                                                                                                                                                                                                                                                                                     |
| ---                                                                                                                                                                                                                                                                                                                                                                                                                                                    |
| ---                                                                                                                                                                                                                                                                                                                                                                                                                                                    |
| glycoprotein hormones, alpha subunit                                                                                                                                                                                                                                                                                                                                                                                                                   |
| phosphatidylinositol-4-phosphate 5-kinase, type II, alpha                                                                                                                                                                                                                                                                                                                                                                                              |
| C-src tyrosine kinase                                                                                                                                                                                                                                                                                                                                                                                                                                  |
| H1 histone family, member X                                                                                                                                                                                                                                                                                                                                                                                                                            |
| advanced glycosylation end product-specific receptor                                                                                                                                                                                                                                                                                                                                                                                                   |
| RUN and FYVE domain containing 1                                                                                                                                                                                                                                                                                                                                                                                                                       |
| dystrobrevin alpha                                                                                                                                                                                                                                                                                                                                                                                                                                     |
| dystrobrevin alpha                                                                                                                                                                                                                                                                                                                                                                                                                                     |



|                                                                                                                                               |
|-----------------------------------------------------------------------------------------------------------------------------------------------|
| ADP-ribosylation factor-like 4C                                                                                                               |
| aristaless related homeobox gene (Drosophila)                                                                                                 |
| feline sarcoma oncogene                                                                                                                       |
| ubiquitin-fold modifier 1                                                                                                                     |
| nuclear receptor subfamily 2, group C, member 1                                                                                               |
| methyltransferase like 5                                                                                                                      |
| proprotein convertase subtilisin/kexin type 5                                                                                                 |
| proprotein convertase subtilisin/kexin type 5                                                                                                 |
| proprotein convertase subtilisin/kexin type 5                                                                                                 |
| CCAAT/enhancer binding protein (C/EBP), gamma                                                                                                 |
| splicing factor 3a, subunit 2                                                                                                                 |
| splicing factor 3a, subunit 2                                                                                                                 |
| decay accelerating factor 2                                                                                                                   |
| signal transducer and activator of transcription 5B                                                                                           |
| adenylate cyclase activating polypeptide 1                                                                                                    |
| zinc finger and BTB domain containing 16                                                                                                      |
| zinc finger and BTB domain containing 16                                                                                                      |
| CD6 antigen                                                                                                                                   |
| CD6 antigen                                                                                                                                   |
| insulin receptor substrate 2                                                                                                                  |
| RIKEN cDNA A430107D22 gene                                                                                                                    |
| elastin                                                                                                                                       |
| C1q domain containing 1                                                                                                                       |
| Unc-51 like kinase 1 (C. elegans)                                                                                                             |
| angiopoietin 2                                                                                                                                |
| expressed sequence AF013969 /// similar to CG5514-PB, isoform B /// region containing expressed sequence AF013969; RIKEN cDNA A230054D04 gene |
| RAS related protein 2a                                                                                                                        |
| steroidogenic acute regulatory protein                                                                                                        |
| cathepsin W                                                                                                                                   |
| keratin associated protein 12-1                                                                                                               |
| MAD homolog 7 (Drosophila)                                                                                                                    |
| glycoprotein 49 A /// leukocyte immunoglobulin-like receptor, subfamily B, member 4                                                           |
| myosin, heavy polypeptide 2, skeletal muscle, adult                                                                                           |
| midline 1 /// similar to Midline-1 (Tripartite motif protein 18) (Midin) /// similar to midline 1                                             |
| bridging integrator 1                                                                                                                         |
| histocompatibility 2, Q region locus 1                                                                                                        |
| complement component 1, q subcomponent, C chain                                                                                               |
| C-type lectin domain family 3, member b                                                                                                       |
| RNA polymerase 1-2 /// similar to DNA-directed RNA polymerase I 135 kDa polypeptide (RNA polymerase I subunit 2) (RPA135)                     |
| DEAD (Asp-Glu-Ala-Asp) box polypeptide 50                                                                                                     |
| catenin (cadherin associated protein), alpha 2                                                                                                |
| catenin (cadherin associated protein), alpha 2                                                                                                |
| zinc finger protein 312                                                                                                                       |
| neurolysin (metallopeptidase M3 family)                                                                                                       |
| erythrocyte protein band 4.1-like 4a                                                                                                          |
| suppressor of cytokine signaling 3                                                                                                            |
| RIKEN cDNA 1810007M14 gene                                                                                                                    |
| retinoid X receptor alpha                                                                                                                     |
| retinoid X receptor alpha                                                                                                                     |
| retinoid X receptor gamma                                                                                                                     |
| protein phosphatase 1, regulatory (inhibitor) subunit 12C                                                                                     |
| ELAV (embryonic lethal, abnormal vision, Drosophila)-like 3 (Hu antigen C)                                                                    |
| keratin associated protein 5-5 /// hypothetical protein LOC665305 /// hypothetical protein LOC672423                                          |

|                                                                                       |
|---------------------------------------------------------------------------------------|
| nuclear factor I/C                                                                    |
| serum amyloid A 4                                                                     |
| RIKEN cDNA B930007L02 gene                                                            |
| exonuclease 1                                                                         |
| DEAD (Asp-Glu-Ala-Asp) box polypeptide 50                                             |
| keratin associated protein 14                                                         |
| Rho GTPase activating protein 5                                                       |
| nuclear receptor subfamily 4, group A, member 2                                       |
| nuclear receptor subfamily 4, group A, member 2                                       |
| papillary renal cell carcinoma (translocation-associated)                             |
| expressed sequence AI607873                                                           |
| cholecystokinin A receptor                                                            |
| keratin associated protein 6-2                                                        |
| myosin Vb                                                                             |
| homeo box B4                                                                          |
| cathepsin B                                                                           |
| circadian locomoter output cycles kaput                                               |
| developmental pluripotency associated 4                                               |
| transducin (beta)-like 3                                                              |
| ---                                                                                   |
| coenzyme Q4 homolog (yeast)                                                           |
| wild-type p53-induced gene 1                                                          |
| leprecan-like 2                                                                       |
| SRY-box containing gene 3                                                             |
| TROVE domain family, member 2                                                         |
| interleukin 11                                                                        |
| coagulation factor II (thrombin) receptor                                             |
| RIKEN cDNA 2700007P21 gene                                                            |
| paternally expressed 10                                                               |
| trophinin                                                                             |
| paired box gene 6                                                                     |
| RNA binding motif protein 16                                                          |
| protein tyrosine phosphatase, non-receptor type 18                                    |
| prolactin-like protein J                                                              |
| transcription factor AP-2, gamma                                                      |
| mitogen-activated protein kinase kinase kinase 6                                      |
| myosin IE                                                                             |
| excision repair cross-complementing rodent repair deficiency, complementation group 2 |
| golgi transport 1 homolog B (S. cerevisiae)                                           |
| actinin, alpha 1                                                                      |
| RIKEN cDNA 2510002D24 gene                                                            |
| RIKEN cDNA 2610304G08 gene                                                            |
| interleukin 4                                                                         |
| interleukin 4                                                                         |
| Interleukin 4                                                                         |
| interleukin 4                                                                         |
| suppressor of cytokine signaling 5                                                    |
| adaptor protein complex AP-1, gamma 1 subunit                                         |
| protein tyrosine phosphatase, receptor type, B                                        |
| seven in absentia 1B                                                                  |
| complement factor H-related 1                                                         |
| solute carrier family 2 (facilitated glucose transporter), member 3                   |
| RIKEN cDNA C130076O07 gene                                                            |

|                                                                                                                                                                                                                                  |
|----------------------------------------------------------------------------------------------------------------------------------------------------------------------------------------------------------------------------------|
| ADP-ribosylation factor-like 5A                                                                                                                                                                                                  |
| sema domain, immunoglobulin domain (Ig), short basic domain, secreted, (semaphorin) 3E                                                                                                                                           |
| phosphatidylinositol glycan, class N                                                                                                                                                                                             |
| jumonji, AT rich interactive domain 1A (Rbp2 like)                                                                                                                                                                               |
| max binding protein                                                                                                                                                                                                              |
| inhibitor of kappaB kinase epsilon                                                                                                                                                                                               |
| Son of sevenless homolog 2 (Drosophila)                                                                                                                                                                                          |
| protein tyrosine phosphatase, receptor type, R                                                                                                                                                                                   |
| phosphatidylinositol glycan, class A                                                                                                                                                                                             |
| POU domain, class 2, transcription factor 2                                                                                                                                                                                      |
| ovary testis transcribed /// similar to ovary testis transcribed |
| Ng23 protein                                                                                                                                                                                                                     |
| protein tyrosine phosphatase, receptor type, M                                                                                                                                                                                   |
| protein tyrosine phosphatase, receptor type, M                                                                                                                                                                                   |
| polo-like kinase 2 (Drosophila)                                                                                                                                                                                                  |
| phosphatidylinositol 3-kinase, C2 domain containing, alpha polypeptide                                                                                                                                                           |
| phosphatidylinositol 3-kinase, C2 domain containing, alpha polypeptide                                                                                                                                                           |
| Procollagen, type XII, alpha 1                                                                                                                                                                                                   |
| procollagen, type XII, alpha 1                                                                                                                                                                                                   |
| schlafen 4                                                                                                                                                                                                                       |
| immunoglobulin lambda chain, variable 1 /// RIKEN cDNA 2010309G21 gene /// hypothetical protein LOC207685 /// similar to Ig lambda-3 chain C region - mouse                                                                      |
| ELAV (embryonic lethal, abnormal vision, Drosophila)-like 2 (Hu antigen B)                                                                                                                                                       |
| RIKEN cDNA 2010301N04 gene                                                                                                                                                                                                       |
| Similar to Poly(A) binding protein, cytoplasmic 4, isoform 1                                                                                                                                                                     |
| ---                                                                                                                                                                                                                              |
| ---                                                                                                                                                                                                                              |
| cathelicidin antimicrobial peptide                                                                                                                                                                                               |
| mitogen-activated protein kinase 12                                                                                                                                                                                              |
| Kruppel-like factor 17                                                                                                                                                                                                           |
| PTK7 protein tyrosine kinase 7                                                                                                                                                                                                   |
| RIKEN cDNA A630038E17 gene                                                                                                                                                                                                       |
| RAB17, member RAS oncogene family                                                                                                                                                                                                |
| ---                                                                                                                                                                                                                              |
| membrane metallo endopeptidase                                                                                                                                                                                                   |
| distal-less homeobox 2                                                                                                                                                                                                           |
| Sirtuin 1 ((silent mating type information regulation 2, homolog) 1 (S. cerevisiae)                                                                                                                                              |
| SAP30 binding protein                                                                                                                                                                                                            |
| latent transforming growth factor beta binding protein 2                                                                                                                                                                         |
| polymerase (RNA) mitochondrial (DNA directed)                                                                                                                                                                                    |
| polymerase (RNA) mitochondrial (DNA directed)                                                                                                                                                                                    |
| RIKEN cDNA 2310001H12 gene /// similar to zinc finger protein 709 /// similar to zinc finger protein 665                                                                                                                         |
| TATA box binding protein (Tbp)-associated factor, RNA polymerase I, A                                                                                                                                                            |
| adrenergic receptor, alpha 1b                                                                                                                                                                                                    |
| UDP-Gal:betaGlcNAc beta 1,3-galactosyltransferase, polypeptide 2                                                                                                                                                                 |
| SRY-box containing gene 1                                                                                                                                                                                                        |
| SWI/SNF related, matrix associated, actin dependent regulator of chromatin, subfamily a, member 3                                                                                                                                |
| SWI/SNF related, matrix associated, actin dependent regulator of chromatin, subfamily a, member 3                                                                                                                                |
| SWI/SNF related, matrix associated, actin dependent regulator of chromatin, subfamily a, member 3                                                                                                                                |
| neurofilament 3, medium                                                                                                                                                                                                          |
| potassium voltage gated channel, Shaw-related subfamily, member 3                                                                                                                                                                |
| thyroid hormone receptor alpha                                                                                                                                                                                                   |
| insulin-like growth factor binding protein-like 1                                                                                                                                                                                |
| microtubule-associated protein, RP/EB family, member 1                                                                                                                                                                           |

|                                                                                                               |
|---------------------------------------------------------------------------------------------------------------|
| dynamin 2                                                                                                     |
| endothelial differentiation, sphingolipid G-protein-coupled receptor, 3                                       |
| kallikrein 6                                                                                                  |
| avian musculoaponeurotic fibrosarcoma (v-maf) AS42 oncogene homolog                                           |
| zinc finger protein, multitype 2                                                                              |
| protein tyrosine phosphatase, non-receptor type 22 (lymphoid)                                                 |
| a disintegrin and metallopeptidase domain 23                                                                  |
| NEL-like 2 (chicken)                                                                                          |
| B lymphoid kinase                                                                                             |
| signal transducing adaptor molecule (SH3 domain and ITAM motif) 1                                             |
| ELAV (embryonic lethal, abnormal vision, Drosophila)-like 4 (Hu antigen D)                                    |
| dual specificity phosphatase 8                                                                                |
| cadherin EGF LAG seven-pass G-type receptor 2                                                                 |
| cadherin EGF LAG seven-pass G-type receptor 2                                                                 |
| c-fos induced growth factor                                                                                   |
| laminin, alpha 2                                                                                              |
| Scl/Tal1 interrupting locus                                                                                   |
| receptor (calcitonin) activity modifying protein 3                                                            |
| transforming growth factor alpha                                                                              |
| ADP-ribosylation factor-like 10                                                                               |
| histidine rich calcium binding protein                                                                        |
| bone morphogenetic protein 6                                                                                  |
| adenosine A1 receptor                                                                                         |
| activating signal cointegrator 1 complex subunit 1                                                            |
| Ras-like without CAAX 1                                                                                       |
| gene model 1060, (NCBI)                                                                                       |
| protein tyrosine phosphatase, receptor type Z, polypeptide 1                                                  |
| protein tyrosine phosphatase, receptor type Z, polypeptide 1                                                  |
| protein tyrosine phosphatase, receptor type Z, polypeptide 1                                                  |
| bromodomain adjacent to zinc finger domain, 1B                                                                |
| myosin VI                                                                                                     |
| dual-specificity tyrosine-(Y)-phosphorylation regulated kinase 1a                                             |
| xeroderma pigmentosum, complementation group A                                                                |
| Chloride channel 2                                                                                            |
| Hermansky-Pudlak syndrome 4 homolog (human)                                                                   |
| thromboxane A synthase 1, platelet                                                                            |
| cDNA sequence BC038311                                                                                        |
| odd Oz/ten-m homolog 2 (Drosophila)                                                                           |
| phosphatidylinositol 3-kinase catalytic delta polypeptide                                                     |
| cytochrome b-561                                                                                              |
| Transcribed locus                                                                                             |
| potassium voltage-gated channel, shaker-related subfamily, member 3                                           |
| cAMP responsive element binding protein-like 1                                                                |
| cAMP responsive element binding protein-like 1                                                                |
| Insulin induced gene 1                                                                                        |
| centaurin, gamma 2                                                                                            |
| vacuolar protein sorting 37B (yeast)                                                                          |
| runt related transcription factor 1                                                                           |
| N-deacetylase/N-sulfotransferase (heparan glucosaminyl) 2                                                     |
| leukotriene C4 synthase                                                                                       |
| similar to putative retrovirus-related gag protein                                                            |
| ST6 (alpha-N-acetyl-neuraminy1-2,3-beta-galactosyl-1,3)-N-acetylgalactosaminide alpha-2,6-sialyltransferase 5 |
| wingless-related MMTV integration site 7B                                                                     |

|                                                                                  |
|----------------------------------------------------------------------------------|
| karyopherin (importin) alpha 6                                                   |
| CD7 antigen                                                                      |
| myomesin 1                                                                       |
| RIKEN cDNA C130065N10 gene                                                       |
| similar to Zinc finger protein OZF (Zinc finger protein 260) (Zfp-260)           |
| RAD23a homolog (S. cerevisiae)                                                   |
| HS1 binding protein 3                                                            |
| sperm associated antigen 5                                                       |
| forkhead box K2                                                                  |
| a disintegrin and metallopeptidase domain 12 (meltrin alpha)                     |
| tumor necrosis factor (ligand) superfamily, member 9                             |
| frequenin homolog (Drosophila)                                                   |
| RAS protein activator like 1 (GAP1 like)                                         |
| ATP-binding cassette, sub-family B (MDR/TAP), member 9                           |
| chaperonin subunit 6b (zeta)                                                     |
| neurotrophin 3                                                                   |
| WD repeat, SAM and U-box domain containing 1                                     |
| chromogranin A                                                                   |
| par-6 (partitioning defective 6,) homolog alpha (C. elegans)                     |
| zinc finger protein 692                                                          |
| chromodomain helicase DNA binding protein 1-like                                 |
| tetraspanin 5                                                                    |
| transforming growth factor, beta receptor I                                      |
| arsA (bacterial) arsenite transporter, ATP-binding, homolog 1                    |
| melanocortin 2 receptor                                                          |
| coiled-coil-helix-coiled-coil-helix domain containing 5                          |
| zinc finger protein 574                                                          |
| kinesin family member 5C                                                         |
| TRAF-interacting protein                                                         |
| retinaldehyde binding protein 1                                                  |
| serine/threonine kinase 23                                                       |
| transmembrane 7 superfamily member 2                                             |
| otoconin 90                                                                      |
| interferon regulatory factor 6                                                   |
| fibroblast activation protein                                                    |
| RIKEN cDNA 1500005P14 gene                                                       |
| zinc finger protein 1                                                            |
| zinc finger protein 1                                                            |
| calcium channel, voltage-dependent, P/Q type, alpha 1A subunit                   |
| glial cell line derived neurotrophic factor family receptor alpha 2              |
| glial cell line derived neurotrophic factor family receptor alpha 2              |
| solute carrier family 12, member 4                                               |
| Ankyrin repeat domain 11                                                         |
| phosphatidylinositol 3-kinase, catalytic, alpha polypeptide                      |
| eyes absent 4 homolog (Drosophila)                                               |
| solute carrier family 6 (neurotransmitter transporter), member 20                |
| testis specific protein, Ddc8                                                    |
| TATA box binding protein (Tbp)-associated factor, RNA polymerase I, C            |
| RIKEN cDNA E130201N16 gene                                                       |
| origin recognition complex, subunit 1-like (S.cereviaiae)                        |
| chemokine (C-C motif) ligand 8                                                   |
| sema domain, immunoglobulin domain (Ig), TM domain, and short cytoplasmic domain |
| matrix metallopeptidase 17                                                       |

|                                                                                                                                                                                                                                                                                                                                                                                                                                                                                                |
|------------------------------------------------------------------------------------------------------------------------------------------------------------------------------------------------------------------------------------------------------------------------------------------------------------------------------------------------------------------------------------------------------------------------------------------------------------------------------------------------|
| septin 6                                                                                                                                                                                                                                                                                                                                                                                                                                                                                       |
| MAP kinase-interacting serine/threonine kinase 1                                                                                                                                                                                                                                                                                                                                                                                                                                               |
| phospholipase C, beta 1                                                                                                                                                                                                                                                                                                                                                                                                                                                                        |
| phospholipase C, beta 1                                                                                                                                                                                                                                                                                                                                                                                                                                                                        |
| phospholipase C, beta 1                                                                                                                                                                                                                                                                                                                                                                                                                                                                        |
| ankyrin repeat domain 49                                                                                                                                                                                                                                                                                                                                                                                                                                                                       |
| secreted frizzled-related sequence protein 4                                                                                                                                                                                                                                                                                                                                                                                                                                                   |
| colony stimulating factor 2 receptor, alpha, low-affinity (granulocyte-macrophage) /// immunoglobulin heavy chain (J558 family) /// cDNA sequence AB069917 /// similar to Ig heavy chain V region 102 precursor /// similar to Ig heavy chain V region B1-8/186-2 precursor /// similar to Ig heavy chain V region 23 precursor /// similar to Ig heavy chain V region 102 precursor /// similar to Ig heavy chain V region 145 precursor /// similar to Ig heavy chain V region 102 precursor |
| schlafen 2                                                                                                                                                                                                                                                                                                                                                                                                                                                                                     |
| schlafen 2                                                                                                                                                                                                                                                                                                                                                                                                                                                                                     |
| MAP kinase-interacting serine/threonine kinase 2                                                                                                                                                                                                                                                                                                                                                                                                                                               |
| phospholipase D1                                                                                                                                                                                                                                                                                                                                                                                                                                                                               |
| phospholipase D1                                                                                                                                                                                                                                                                                                                                                                                                                                                                               |
| growth differentiation factor 3                                                                                                                                                                                                                                                                                                                                                                                                                                                                |
| spindlin                                                                                                                                                                                                                                                                                                                                                                                                                                                                                       |
| stromal antigen 1                                                                                                                                                                                                                                                                                                                                                                                                                                                                              |
| zinc finger protein 53                                                                                                                                                                                                                                                                                                                                                                                                                                                                         |
| CHK2 checkpoint homolog (S. pombe)                                                                                                                                                                                                                                                                                                                                                                                                                                                             |
| formin-like 1                                                                                                                                                                                                                                                                                                                                                                                                                                                                                  |
| formin-like 1                                                                                                                                                                                                                                                                                                                                                                                                                                                                                  |
| human immunodeficiency virus type I enhancer binding protein 2                                                                                                                                                                                                                                                                                                                                                                                                                                 |
| bone morphogenetic protein 15                                                                                                                                                                                                                                                                                                                                                                                                                                                                  |
| solute carrier family 22 (organic cation transporter), member 21                                                                                                                                                                                                                                                                                                                                                                                                                               |
| SRY-box containing gene 7                                                                                                                                                                                                                                                                                                                                                                                                                                                                      |
| caspase 12                                                                                                                                                                                                                                                                                                                                                                                                                                                                                     |
| GTPase, IMAP family member 1                                                                                                                                                                                                                                                                                                                                                                                                                                                                   |
| kinesin family member 9                                                                                                                                                                                                                                                                                                                                                                                                                                                                        |
| adenylate kinase 3                                                                                                                                                                                                                                                                                                                                                                                                                                                                             |
| recombining binding protein suppressor of hairless-like (Drosophila)                                                                                                                                                                                                                                                                                                                                                                                                                           |
| annexin A10                                                                                                                                                                                                                                                                                                                                                                                                                                                                                    |
| CCR4-NOT transcription complex, subunit 4                                                                                                                                                                                                                                                                                                                                                                                                                                                      |
| vesicle-associated membrane protein 5                                                                                                                                                                                                                                                                                                                                                                                                                                                          |
| solute carrier family 22 (organic cation transporter), member 4                                                                                                                                                                                                                                                                                                                                                                                                                                |
| unc-13 homolog B (C. elegans)                                                                                                                                                                                                                                                                                                                                                                                                                                                                  |
| Unc4.1 homeobox (C. elegans)                                                                                                                                                                                                                                                                                                                                                                                                                                                                   |
| odd Oz/ten-m homolog 3 (Drosophila)                                                                                                                                                                                                                                                                                                                                                                                                                                                            |
| pleiomorphic adenoma gene-like 1                                                                                                                                                                                                                                                                                                                                                                                                                                                               |
| pleiomorphic adenoma gene-like 1                                                                                                                                                                                                                                                                                                                                                                                                                                                               |
| Hus1 homolog (S. pombe)                                                                                                                                                                                                                                                                                                                                                                                                                                                                        |
| Hus1 homolog (S. pombe)                                                                                                                                                                                                                                                                                                                                                                                                                                                                        |
| Hus1 homolog (S. pombe)                                                                                                                                                                                                                                                                                                                                                                                                                                                                        |
| hyaluronan and proteoglycan link protein 1                                                                                                                                                                                                                                                                                                                                                                                                                                                     |
| utrophin                                                                                                                                                                                                                                                                                                                                                                                                                                                                                       |
| utrophin                                                                                                                                                                                                                                                                                                                                                                                                                                                                                       |
| coagulation factor XII (Hageman factor)                                                                                                                                                                                                                                                                                                                                                                                                                                                        |
| jagged 2                                                                                                                                                                                                                                                                                                                                                                                                                                                                                       |
| arylalkylamine N-acetyltransferase                                                                                                                                                                                                                                                                                                                                                                                                                                                             |
| arylalkylamine N-acetyltransferase                                                                                                                                                                                                                                                                                                                                                                                                                                                             |
| stromal antigen 2                                                                                                                                                                                                                                                                                                                                                                                                                                                                              |
| BarH-like homeobox 1                                                                                                                                                                                                                                                                                                                                                                                                                                                                           |
| ISL1 transcription factor, LIM/homeodomain                                                                                                                                                                                                                                                                                                                                                                                                                                                     |
| N-deacetylase/N-sulfotransferase (heparan glucosaminy) 1                                                                                                                                                                                                                                                                                                                                                                                                                                       |
| RNA binding motif, single stranded interacting protein 2                                                                                                                                                                                                                                                                                                                                                                                                                                       |

|                                                                                                                                                                                                    |
|----------------------------------------------------------------------------------------------------------------------------------------------------------------------------------------------------|
| neogenin                                                                                                                                                                                           |
| phosphorylase kinase alpha 1                                                                                                                                                                       |
| expressed sequence C80425                                                                                                                                                                          |
| AT motif binding factor 1                                                                                                                                                                          |
| potassium inwardly-rectifying channel, subfamily J, member 4                                                                                                                                       |
| potassium inwardly-rectifying channel, subfamily J, member 6                                                                                                                                       |
| potassium inwardly-rectifying channel, subfamily J, member 6                                                                                                                                       |
| BTB (POZ) domain containing 14A                                                                                                                                                                    |
| BTB (POZ) domain containing 14A                                                                                                                                                                    |
| adenylate cyclase 9                                                                                                                                                                                |
| brain-specific angiogenesis inhibitor 1                                                                                                                                                            |
| aryl hydrocarbon receptor nuclear translocator                                                                                                                                                     |
| translocation protein 1                                                                                                                                                                            |
| arginine vasopressin receptor 1A                                                                                                                                                                   |
| calcitonin/calcitonin-related polypeptide, alpha                                                                                                                                                   |
| GTP binding protein (gene overexpressed in skeletal muscle)                                                                                                                                        |
| early B-cell factor 1                                                                                                                                                                              |
| adrenergic receptor, beta 3                                                                                                                                                                        |
| adrenergic receptor, beta 3                                                                                                                                                                        |
| adrenergic receptor, beta 3                                                                                                                                                                        |
| S100 calcium binding protein A10 (calpactin)                                                                                                                                                       |
| spermidine synthase                                                                                                                                                                                |
| myosin, light polypeptide 1                                                                                                                                                                        |
| DNA segment, Chr 4, Wayne State University 53, expressed                                                                                                                                           |
| mitogen activated protein kinase kinase 2                                                                                                                                                          |
| proteasome (prosome, macropain) subunit, alpha type 3                                                                                                                                              |
| prostaglandin D2 synthase (brain)                                                                                                                                                                  |
| prostaglandin D2 synthase (brain)                                                                                                                                                                  |
| huntingtin interacting protein 2                                                                                                                                                                   |
| huntingtin interacting protein 2                                                                                                                                                                   |
| protein kinase inhibitor, gamma                                                                                                                                                                    |
| keratin complex 1, acidic, gene 19                                                                                                                                                                 |
| ligase I, DNA, ATP-dependent                                                                                                                                                                       |
| esterase D/formylglutathione hydrolase                                                                                                                                                             |
| C-terminal binding protein 2                                                                                                                                                                       |
| tetraspanin 6                                                                                                                                                                                      |
| aldo-keto reductase family 1, member C6                                                                                                                                                            |
| hydroxysteroid (17-beta) dehydrogenase 1                                                                                                                                                           |
| vascular cell adhesion molecule 1                                                                                                                                                                  |
| vascular cell adhesion molecule 1                                                                                                                                                                  |
| vascular cell adhesion molecule 1                                                                                                                                                                  |
| ectonucleoside triphosphate diphosphohydrolase 5                                                                                                                                                   |
| nuclear factor, erythroid derived 2, like 2                                                                                                                                                        |
| leucine rich repeat (in FLII) interacting protein 1                                                                                                                                                |
| leucine rich repeat (in FLII) interacting protein 1                                                                                                                                                |
| RIKEN cDNA 1110005A23 gene                                                                                                                                                                         |
| death-associated kinase 3                                                                                                                                                                          |
| procollagen, type V, alpha 2                                                                                                                                                                       |
| transcription factor B2, mitochondrial /// gene model 1818, (NCBI)                                                                                                                                 |
| nucleolar protein 5                                                                                                                                                                                |
| ATP synthase, H+ transporting, mitochondrial F0 complex, subunit c (subunit 9), isoform 2 /// similar to ATP synthase, H+ transporting, mitochondrial F0 complex, subunit c (subunit 9), isoform 2 |
| heat shock protein 4                                                                                                                                                                               |
| tumor necrosis factor, alpha-induced protein 1 (endothelial)                                                                                                                                       |

|                                                                                  |
|----------------------------------------------------------------------------------|
| protein phosphatase 2 (formerly 2A), regulatory subunit A (PR 65), alpha isoform |
| succinate dehydrogenase complex, subunit D, integral membrane protein            |
| aryl-hydrocarbon receptor-interacting protein                                    |
| ribosomal protein L37                                                            |
| small inducible cytokine subfamily E, member 1                                   |
| Sjogren syndrome antigen B                                                       |
| histidyl-tRNA synthetase                                                         |
| acyl-Coenzyme A dehydrogenase, medium chain                                      |
| solute carrier family 1 (neutral amino acid transporter), member 5               |
| serine (or cysteine) peptidase inhibitor, clade A, member 3K                     |
| NFKB inhibitor interacting Ras-like protein 2                                    |
| mitogen activated protein kinase kinase 1                                        |
| glutamate dehydrogenase 1                                                        |
| ferredoxin 1                                                                     |
| phosphoserine phosphatase                                                        |
| 3-hydroxy-3-methylglutaryl-Coenzyme A synthase 2                                 |
| glycerol-3-phosphate dehydrogenase 1 (soluble)                                   |
| periostin, osteoblast specific factor                                            |
| adaptor protein complex AP-1, gamma 2 subunit                                    |
| ferrochelataase                                                                  |
| calcyclin binding protein                                                        |
| ATPase, H+ transporting, lysosomal V1 subunit B2                                 |
| ATPase, H+ transporting, lysosomal V1 subunit B2                                 |
| phosphoglycerate mutase 2                                                        |
| cytochrome P450, family 4, subfamily a, polypeptide 10                           |
| pancreatic lipase related protein 1                                              |
| titin-cap                                                                        |
| ATPase, H+ transporting, lysosomal V0 subunit D1                                 |
| uromodulin                                                                       |
| urate oxidase                                                                    |
| mesoderm specific transcript                                                     |
| cysteine and glycine-rich protein 1                                              |
| RD RNA-binding protein                                                           |
| GPI-anchored membrane protein 1                                                  |
| solute carrier family 27 (fatty acid transporter), member 5                      |
| inhibitor of DNA binding 3                                                       |
| NADH dehydrogenase (ubiquinone) 1 beta subcomplex, 6                             |
| ubiquitin-activating enzyme E1, Chr X                                            |
| ubiquitin-activating enzyme E1, Chr Y 1                                          |
| small EDRK-rich factor 2                                                         |
| WW domain binding protein 1                                                      |
| poly(rC) binding protein 2                                                       |
| RIKEN cDNA 2210013K02 gene                                                       |
| cold shock domain containing E1, RNA binding                                     |
| loricrin                                                                         |
| expressed in non-metastatic cells 2, protein                                     |
| neural proliferation, differentiation and control gene 1                         |
| similar to ribosomal protein L36                                                 |
| hepatoma-derived growth factor                                                   |
| hepatoma-derived growth factor                                                   |
| calmodulin 3                                                                     |
| calmodulin 3                                                                     |
| cathepsin Z                                                                      |



|                                                                                                            |
|------------------------------------------------------------------------------------------------------------|
| dipeptidylpeptidase 4                                                                                      |
| tubulin, alpha 4                                                                                           |
| SEC61, gamma subunit                                                                                       |
| phosphofructokinase, liver, B-type                                                                         |
| protein phosphatase 2 (formerly 2A), catalytic subunit, alpha isoform                                      |
| aurora kinase A                                                                                            |
| vacuolar protein sorting 35                                                                                |
| carbonic anhydrase 2                                                                                       |
| neurofibromatosis 2                                                                                        |
| myeloblastosis oncogene                                                                                    |
| proteasome (prosome, macropain) 26S subunit, non-ATPase, 2                                                 |
| mitochondrial ribosomal protein L23                                                                        |
| retinoblastoma binding protein 4                                                                           |
| syntaxin binding protein 3A                                                                                |
| DNA segment, human DXS9928E                                                                                |
| mannosidase, alpha, class 1A, member 2                                                                     |
| Notch gene homolog 4 (Drosophila)                                                                          |
| RIKEN cDNA D530037H12 gene                                                                                 |
| polymerase (RNA) III (DNA directed) polypeptide A                                                          |
| glucosaminyl (N-acetyl) transferase 1, core 2 /// similar to glucosaminyl (N-acetyl) transferase 1, core 2 |
| zinc finger and BTB domain containing 12                                                                   |
| forkhead box Q1                                                                                            |
| Rap guanine nucleotide exchange factor (GEF) 4                                                             |
| ubiquitin-conjugating enzyme E2E 1, UBC4/5 homolog (yeast)                                                 |
| protein tyrosine phosphatase, receptor type, V                                                             |
| protein tyrosine phosphatase, receptor type, V                                                             |
| protein tyrosine phosphatase, receptor type, V                                                             |
| RIKEN cDNA 2500002G23 gene                                                                                 |
| X-linked lymphocyte-regulated complex /// RIKEN cDNA 3830403N18 gene                                       |
| SH3-domain binding protein 1                                                                               |
| androgen receptor                                                                                          |
| Bruton agammaglobulinemia tyrosine kinase                                                                  |
| myosin, light polypeptide 6B                                                                               |
| ral guanine nucleotide dissociation stimulator,-like 1                                                     |
| GNAS (guanine nucleotide binding protein, alpha stimulating) complex locus                                 |
| SH3-domain GRB2-like 2                                                                                     |
| forkhead box N1                                                                                            |
| runt related transcription factor 2                                                                        |
| runt related transcription factor 2                                                                        |
| DEAD (Asp-Glu-Ala-Asp) box polypeptide 25                                                                  |
| melanoma antigen, family L, 2                                                                              |
| synaptotagmin VIII                                                                                         |
| CD3 antigen, delta polypeptide                                                                             |
| protease, serine, 15                                                                                       |
| thromboxane A2 receptor                                                                                    |
| solute carrier family 27 (fatty acid transporter), member 3                                                |
| SWI/SNF related, matrix associated, actin dependent regulator of chromatin, subfamily a, member 4          |
| acid phosphatase 2, lysosomal                                                                              |
| interleukin 18 binding protein                                                                             |
| gastric intrinsic factor                                                                                   |
| protein phosphatase 2 (formerly 2A), regulatory subunit B (PR 52), beta isoform                            |
| synaptonemal complex protein 1                                                                             |
| ninein                                                                                                     |

|                                                                                          |
|------------------------------------------------------------------------------------------|
| chitinase 3-like 3                                                                       |
| frequently rearranged in advanced T-cell lymphomas                                       |
| nuclear receptor subfamily 6, group A, member 1                                          |
| forkhead box A1                                                                          |
| c-mer proto-oncogene tyrosine kinase                                                     |
| solute carrier family 7 (cationic amino acid transporter, y+ system), member 9           |
| brevican                                                                                 |
| bone morphogenetic protein 1                                                             |
| astrotactin 1                                                                            |
| polybromo 1                                                                              |
| excision repair cross-complementing rodent repair deficiency, complementation group 4    |
| T-box 2                                                                                  |
| plasmacytoma variant translocation 1                                                     |
| plasmacytoma variant translocation 1                                                     |
| DEAD (Asp-Glu-Ala-Asp) box polypeptide 19b                                               |
| Rho-guanine nucleotide exchange factor                                                   |
| mast cell protease 6                                                                     |
| RIKEN cDNA 1810009J06 gene                                                               |
| hepatic nuclear factor 4, alpha                                                          |
| intercellular adhesion molecule 5, telencephalin                                         |
| ubiquitin D                                                                              |
| neurogenic differentiation 1                                                             |
| interferon, alpha-inducible protein 27                                                   |
| sine oculis-related homeobox 1 homolog (Drosophila)                                      |
| heterogeneous nuclear ribonucleoprotein A1                                               |
| growth arrest specific 8                                                                 |
| SRY-box containing gene 6                                                                |
| amyloid beta (A4) precursor protein-binding, family A, member 2                          |
| proteoglycan 2, bone marrow                                                              |
| heparin-binding EGF-like growth factor                                                   |
| pentraxin related gene                                                                   |
| a disintegrin and metallopeptidase domain 2                                              |
| a disintegrin and metallopeptidase domain 4                                              |
| G protein-coupled receptor 83                                                            |
| phospholipase A2, group IIA (platelets, synovial fluid)                                  |
| solute carrier family 7 (cationic amino acid transporter, y+ system), member 2           |
| interferon regulatory factor 4                                                           |
| glial cell line derived neurotrophic factor                                              |
| involucrin                                                                               |
| Immunoglobulin heavy chain 1a (serum IgG2a)                                              |
| Immunoglobulin heavy chain 1a (serum IgG2a)                                              |
| small chemokine (C-C motif) ligand 11                                                    |
| sperm adhesion molecule 1                                                                |
| adenomatosis polyposis coli 2                                                            |
| homeo box A9                                                                             |
| N-acetyltransferase 2 (arylamine N-acetyltransferase)                                    |
| NK2 transcription factor related, locus 2 (Drosophila)                                   |
| gamma-aminobutyric acid (GABA-A) receptor, subunit beta 1 /// RIKEN cDNA B230208N19 gene |
| wingless related MMTV integration site 10b                                               |
| wingless related MMTV integration site 10b                                               |
| wingless related MMTV integration site 10b                                               |
| myeloid ecotropic viral integration site-related gene 2                                  |
| ferredoxin reductase                                                                     |

|                                                                                                                                                                                                                                                                                                                                                                                                                                                                                                                                                                                                              |
|--------------------------------------------------------------------------------------------------------------------------------------------------------------------------------------------------------------------------------------------------------------------------------------------------------------------------------------------------------------------------------------------------------------------------------------------------------------------------------------------------------------------------------------------------------------------------------------------------------------|
| secretin                                                                                                                                                                                                                                                                                                                                                                                                                                                                                                                                                                                                     |
| secretin                                                                                                                                                                                                                                                                                                                                                                                                                                                                                                                                                                                                     |
| seizure related gene 6                                                                                                                                                                                                                                                                                                                                                                                                                                                                                                                                                                                       |
| dual specificity phosphatase 2                                                                                                                                                                                                                                                                                                                                                                                                                                                                                                                                                                               |
| laminin, beta 3                                                                                                                                                                                                                                                                                                                                                                                                                                                                                                                                                                                              |
| Wiskott-Aldrich syndrome homolog (human)                                                                                                                                                                                                                                                                                                                                                                                                                                                                                                                                                                     |
| ---                                                                                                                                                                                                                                                                                                                                                                                                                                                                                                                                                                                                          |
| C-type lectin domain family 4, member a2                                                                                                                                                                                                                                                                                                                                                                                                                                                                                                                                                                     |
| ATP-binding cassette, sub-family B (MDR/TAP), member 7                                                                                                                                                                                                                                                                                                                                                                                                                                                                                                                                                       |
| kinase suppressor of ras 1                                                                                                                                                                                                                                                                                                                                                                                                                                                                                                                                                                                   |
| kinase suppressor of ras 1                                                                                                                                                                                                                                                                                                                                                                                                                                                                                                                                                                                   |
| heart and neural crest derivatives expressed transcript 1                                                                                                                                                                                                                                                                                                                                                                                                                                                                                                                                                    |
| bone morphogenetic protein receptor, type 1A                                                                                                                                                                                                                                                                                                                                                                                                                                                                                                                                                                 |
| aminolevulinic acid synthase 2, erythroid                                                                                                                                                                                                                                                                                                                                                                                                                                                                                                                                                                    |
| proteasome (prosome, macropain) 26S subunit, non-ATPase, 3                                                                                                                                                                                                                                                                                                                                                                                                                                                                                                                                                   |
| S100 calcium binding protein A6 (calcyclin)                                                                                                                                                                                                                                                                                                                                                                                                                                                                                                                                                                  |
| zinc finger protein 207                                                                                                                                                                                                                                                                                                                                                                                                                                                                                                                                                                                      |
| neuropilin 1                                                                                                                                                                                                                                                                                                                                                                                                                                                                                                                                                                                                 |
| similar to poly(A) binding protein, cytoplasmic 4 isoform 1 /// poly A binding protein, cytoplasmic 4 /// similar to Poly(A) binding protein, cytoplasmic 4, isoform 1 /// similar to Poly(A) binding protein, cytoplasmic 4, isoform 1 /// similar to poly(A) binding protein, cytoplasmic 4 isoform 1 /// similar to poly(A) binding protein, cytoplasmic 4 isoform 1 /// similar to poly(A) binding protein, cytoplasmic 4 isoform 2 /// similar to poly(A) binding protein, cytoplasmic 4 isoform 1                                                                                                      |
| poly A binding protein, cytoplasmic 4                                                                                                                                                                                                                                                                                                                                                                                                                                                                                                                                                                        |
| cysteine rich protein 61                                                                                                                                                                                                                                                                                                                                                                                                                                                                                                                                                                                     |
| ---                                                                                                                                                                                                                                                                                                                                                                                                                                                                                                                                                                                                          |
| superantigen 3                                                                                                                                                                                                                                                                                                                                                                                                                                                                                                                                                                                               |
| hypothetical protein LOC625794                                                                                                                                                                                                                                                                                                                                                                                                                                                                                                                                                                               |
| thymopoietin                                                                                                                                                                                                                                                                                                                                                                                                                                                                                                                                                                                                 |
| thymopoietin                                                                                                                                                                                                                                                                                                                                                                                                                                                                                                                                                                                                 |
| growth hormone                                                                                                                                                                                                                                                                                                                                                                                                                                                                                                                                                                                               |
| glucosidase beta 2                                                                                                                                                                                                                                                                                                                                                                                                                                                                                                                                                                                           |
| EF hand domain containing 1                                                                                                                                                                                                                                                                                                                                                                                                                                                                                                                                                                                  |
| ankyrin repeat domain 10                                                                                                                                                                                                                                                                                                                                                                                                                                                                                                                                                                                     |
| centrin 3                                                                                                                                                                                                                                                                                                                                                                                                                                                                                                                                                                                                    |
| centrin 3                                                                                                                                                                                                                                                                                                                                                                                                                                                                                                                                                                                                    |
| karyopherin (importin) alpha 2 /// similar to Importin alpha-2 subunit (Karyopherin alpha-2 subunit) (SRP1-alpha) (RAG cohort protein 1) (Pendulin) (Pore targeting complex 58 kDa subunit) (PTAC58) (Importin alpha P1) /// similar to Importin alpha-2 subunit (Karyopherin alpha-2 subunit) (SRP1-alpha) (RAG cohort protein 1) (Pendulin) (Pore targeting complex 58 kDa subunit) (PTAC58) (Importin alpha P1) /// similar to Importin alpha-2 subunit (Karyopherin alpha-2 subunit) (SRP1-alpha) (RAG cohort protein 1) (Pendulin) (Pore targeting complex 58 kDa subunit) (PTAC58) (Importin alpha P1) |
| uncoupling protein 2 (mitochondrial, proton carrier)                                                                                                                                                                                                                                                                                                                                                                                                                                                                                                                                                         |
| tumor necrosis factor receptor superfamily, member 1a                                                                                                                                                                                                                                                                                                                                                                                                                                                                                                                                                        |
| expressed in non-metastatic cells 1, protein                                                                                                                                                                                                                                                                                                                                                                                                                                                                                                                                                                 |
| microtubule-associated protein 4                                                                                                                                                                                                                                                                                                                                                                                                                                                                                                                                                                             |
| alkaline phosphatase 2, liver                                                                                                                                                                                                                                                                                                                                                                                                                                                                                                                                                                                |
| cullin 3                                                                                                                                                                                                                                                                                                                                                                                                                                                                                                                                                                                                     |
| ATP synthase, H+ transporting, mitochondrial F1 complex, gamma polypeptide 1                                                                                                                                                                                                                                                                                                                                                                                                                                                                                                                                 |
| ATP synthase, H+ transporting, mitochondrial F1 complex, gamma polypeptide 1                                                                                                                                                                                                                                                                                                                                                                                                                                                                                                                                 |
| ATP synthase, H+ transporting, mitochondrial F1 complex, gamma polypeptide 1 /// DNA Segment, Chr 13, Mouse Genome Informatics 7                                                                                                                                                                                                                                                                                                                                                                                                                                                                             |
| ---                                                                                                                                                                                                                                                                                                                                                                                                                                                                                                                                                                                                          |
| proteolipid protein (myelin) 1                                                                                                                                                                                                                                                                                                                                                                                                                                                                                                                                                                               |
| prolactin                                                                                                                                                                                                                                                                                                                                                                                                                                                                                                                                                                                                    |
| polymerase (RNA) II (DNA directed) polypeptide H                                                                                                                                                                                                                                                                                                                                                                                                                                                                                                                                                             |
| ADP-ribosylation factor-like 4A                                                                                                                                                                                                                                                                                                                                                                                                                                                                                                                                                                              |
| p53 and DNA damage regulated 1                                                                                                                                                                                                                                                                                                                                                                                                                                                                                                                                                                               |
| thioredoxin 1                                                                                                                                                                                                                                                                                                                                                                                                                                                                                                                                                                                                |
| FK506 binding protein 4                                                                                                                                                                                                                                                                                                                                                                                                                                                                                                                                                                                      |
| FK506 binding protein 4                                                                                                                                                                                                                                                                                                                                                                                                                                                                                                                                                                                      |

|                                                                                                                                                                                                                                                                                                                                                                               |
|-------------------------------------------------------------------------------------------------------------------------------------------------------------------------------------------------------------------------------------------------------------------------------------------------------------------------------------------------------------------------------|
| pyruvate dehydrogenase kinase, isoenzyme 3                                                                                                                                                                                                                                                                                                                                    |
| retinol binding protein 2, cellular                                                                                                                                                                                                                                                                                                                                           |
| defensin related cryptdin 3 /// defensin related cryptdin 4 /// defensin related cryptdin 6 /// defensin related cryptdin 17 /// defensin related cryptdin 20 /// defensin-related cryptdin 23 /// defensin-related cryptdin 24 /// defensin related cryptdin 26<br>/// similar to Defensin-related sequence cryptdin peptide precursor (Cryptdin-related protein 1C) (CRS1C) |
| cytochrome P450, family 2, subfamily j, polypeptide 6                                                                                                                                                                                                                                                                                                                         |
| cytochrome P450, family 2, subfamily j, polypeptide 5                                                                                                                                                                                                                                                                                                                         |
| eukaryotic translation initiation factor 4A1                                                                                                                                                                                                                                                                                                                                  |
| IMP3, U3 small nucleolar ribonucleoprotein, homolog (yeast)                                                                                                                                                                                                                                                                                                                   |
| ubiquitin-activating enzyme E1C                                                                                                                                                                                                                                                                                                                                               |
| ubiquitin specific peptidase 2                                                                                                                                                                                                                                                                                                                                                |
| ubiquitin specific peptidase 2                                                                                                                                                                                                                                                                                                                                                |
| expressed in non-metastatic cells 6, protein                                                                                                                                                                                                                                                                                                                                  |
| cysteine-rich secretory protein 2                                                                                                                                                                                                                                                                                                                                             |
| mitochondrial ribosomal protein S33                                                                                                                                                                                                                                                                                                                                           |
| nuclear receptor-binding SET-domain protein 1                                                                                                                                                                                                                                                                                                                                 |
| dolichol-phosphate (beta-D) mannosyltransferase 1                                                                                                                                                                                                                                                                                                                             |
| heat shock protein 1 (chaperonin 10)                                                                                                                                                                                                                                                                                                                                          |
| zinc finger protein 36                                                                                                                                                                                                                                                                                                                                                        |
| sideroflexin 1                                                                                                                                                                                                                                                                                                                                                                |
| suppressor of cytokine signaling 1                                                                                                                                                                                                                                                                                                                                            |
| histidine ammonia lyase /// similar to Histidine ammonia-lyase (Histidase)                                                                                                                                                                                                                                                                                                    |
| ribosomal protein L13a                                                                                                                                                                                                                                                                                                                                                        |
| camello-like 1                                                                                                                                                                                                                                                                                                                                                                |
| elastin                                                                                                                                                                                                                                                                                                                                                                       |
| murinoglobulin, pseudogene 1 /// murinoglobulin 1 /// murinoglobulin 2 /// similar to murinoglobulin 1 /// similar to murinoglobulin 1 /// similar to murinoglobulin 1                                                                                                                                                                                                        |
| fascin homolog 1, actin bundling protein (Strongylocentrotus) purpuratus)                                                                                                                                                                                                                                                                                                     |
| U2 small nuclear ribonucleoprotein B                                                                                                                                                                                                                                                                                                                                          |
| nucleoporin 54                                                                                                                                                                                                                                                                                                                                                                |
| chromogranin B                                                                                                                                                                                                                                                                                                                                                                |
| ---                                                                                                                                                                                                                                                                                                                                                                           |
| Eukaryotic translation initiation factor 4, gamma 1                                                                                                                                                                                                                                                                                                                           |
| ---                                                                                                                                                                                                                                                                                                                                                                           |
| mannose-6-phosphate receptor, cation dependent                                                                                                                                                                                                                                                                                                                                |
| mannose-6-phosphate receptor, cation dependent /// mannose-6-phosphate receptor, pseudogene                                                                                                                                                                                                                                                                                   |
| ornithine aminotransferase                                                                                                                                                                                                                                                                                                                                                    |
| chemokine (C-C motif) ligand 6                                                                                                                                                                                                                                                                                                                                                |
| ribosome binding protein 1                                                                                                                                                                                                                                                                                                                                                    |
| ceruloplasmin                                                                                                                                                                                                                                                                                                                                                                 |
| fibronectin 1                                                                                                                                                                                                                                                                                                                                                                 |
| heat shock protein 1                                                                                                                                                                                                                                                                                                                                                          |
| RAB11a, member RAS oncogene family                                                                                                                                                                                                                                                                                                                                            |
| eukaryotic translation initiation factor 1                                                                                                                                                                                                                                                                                                                                    |
| ribosomal protein L22                                                                                                                                                                                                                                                                                                                                                         |
| ribosomal protein L22                                                                                                                                                                                                                                                                                                                                                         |
| secretory leukocyte peptidase inhibitor                                                                                                                                                                                                                                                                                                                                       |
| cytochrome c oxidase, subunit VIIIa                                                                                                                                                                                                                                                                                                                                           |
| keratin complex 1, acidic, gene 17                                                                                                                                                                                                                                                                                                                                            |
| keratin complex 1, acidic, gene 17                                                                                                                                                                                                                                                                                                                                            |
| WW domain binding protein 2                                                                                                                                                                                                                                                                                                                                                   |
| methionine adenosyltransferase I, alpha                                                                                                                                                                                                                                                                                                                                       |
| deoxyribonuclease I                                                                                                                                                                                                                                                                                                                                                           |
| histocompatibility 2, class II antigen A, alpha                                                                                                                                                                                                                                                                                                                               |
| polyhomeotic-like 2 (Drosophila)                                                                                                                                                                                                                                                                                                                                              |
| protein-tyrosine sulfotransferase 2                                                                                                                                                                                                                                                                                                                                           |

|                                                                                                                                                        |
|--------------------------------------------------------------------------------------------------------------------------------------------------------|
| hydroxysteroid dehydrogenase-4, delta<5>-3-beta                                                                                                        |
| Sel1 (suppressor of lin-12) 1 homolog (C. elegans)                                                                                                     |
| Sel1 (suppressor of lin-12) 1 homolog (C. elegans)                                                                                                     |
| NECAP endocytosis associated 1                                                                                                                         |
| protease, serine, 2                                                                                                                                    |
| COP9 (constitutive photomorphogenic) homolog, subunit 7a (Arabidopsis thaliana)                                                                        |
| COP9 (constitutive photomorphogenic) homolog, subunit 7a (Arabidopsis thaliana)                                                                        |
| NADH dehydrogenase (ubiquinone) Fe-S protein 4                                                                                                         |
| transforming growth factor, beta induced                                                                                                               |
| COMM domain containing 3                                                                                                                               |
| protein phosphatase 1G (formerly 2C), magnesium-dependent, gamma isoform                                                                               |
| milk fat globule-EGF factor 8 protein                                                                                                                  |
| myosin light chain, phosphorylatable, fast skeletal muscle /// similar to Myosin regulatory light chain 2, skeletal muscle isoform (G2) (DTNB) (MLC-2) |
| RAB1, member RAS oncogene family                                                                                                                       |
| RAB1, member RAS oncogene family                                                                                                                       |
| glycogen synthase kinase 3 alpha                                                                                                                       |
| troponin T3, skeletal, fast                                                                                                                            |
| dimethylarginine dimethylaminohydrolase 2                                                                                                              |
| phosphoserine/threonine/tyrosine interaction protein                                                                                                   |
| forkhead box D3                                                                                                                                        |
| kinesin family member 1A                                                                                                                               |
| homeo box C9                                                                                                                                           |
| vesicular membrane protein p24                                                                                                                         |
| nuclear factor I/A                                                                                                                                     |
| nuclear factor I/A                                                                                                                                     |
| single-minded homolog 1 (Drosophila)                                                                                                                   |
| single-minded homolog 2 (Drosophila)                                                                                                                   |
| acrosomal vesicle protein 1                                                                                                                            |
| cytochrome P450, family 7, subfamily b, polypeptide 1                                                                                                  |
| glutamic acid decarboxylase 2                                                                                                                          |
| ---                                                                                                                                                    |
| retinoic acid receptor, alpha                                                                                                                          |
| myeloblastosis oncogene-like 1                                                                                                                         |
| transcription factor AP-2 beta                                                                                                                         |
| PR domain containing 1, with ZNF domain                                                                                                                |
| Eph receptor A7                                                                                                                                        |
| Eph receptor A7                                                                                                                                        |
| occludin                                                                                                                                               |
| human immunodeficiency virus type I enhancer binding protein 1                                                                                         |
| placental growth factor                                                                                                                                |
| aryl hydrocarbon receptor nuclear translocator 2                                                                                                       |
| cyclin A1                                                                                                                                              |
| homeo box, msh-like 3                                                                                                                                  |
| ATP-binding cassette, sub-family D (ALD), member 2                                                                                                     |
| ---                                                                                                                                                    |
| homeo box B8                                                                                                                                           |
| synaptotagmin III                                                                                                                                      |
| matrix metallopeptidase 7                                                                                                                              |
| coagulation factor VII                                                                                                                                 |
| 5-hydroxytryptamine (serotonin) receptor 3A                                                                                                            |
| paired-like homeodomain transcription factor 1                                                                                                         |
| procollagen, type X, alpha 1                                                                                                                           |
| transcription factor AP-2, alpha                                                                                                                       |

|                                                                            |
|----------------------------------------------------------------------------|
| transcription factor AP-2, alpha                                           |
| cathepsin G                                                                |
| CCAAT/enhancer binding protein (C/EBP), beta                               |
| myeloproliferative leukemia virus oncogene                                 |
| ets variant gene 1                                                         |
| cytochrome c, testis                                                       |
| distal-less homeobox 5                                                     |
| delta-like 1 (Drosophila)                                                  |
| cerebellin 1 precursor protein                                             |
| POU domain, class 2, transcription factor 3                                |
| zinc finger protein 90                                                     |
| runt-related transcription factor 1; translocated to, 1 (cyclin D-related) |
| contactin 1                                                                |
| fibroblast growth factor receptor 4                                        |
| gamma-aminobutyric acid (GABA-A) receptor, subunit alpha 1                 |
| gamma-aminobutyric acid (GABA-A) receptor, subunit alpha 6                 |
| gamma-aminobutyric acid (GABA-A) receptor, subunit alpha 6                 |
| RIKEN cDNA 1110054M08 gene                                                 |
| tripartite motif protein 21                                                |
| glutamate receptor, ionotropic, AMPA1 (alpha 1)                            |
| glutamate receptor, ionotropic, AMPA1 (alpha 1)                            |
| glutamate receptor, ionotropic, AMPA2 (alpha 2)                            |
| glutamate receptor, ionotropic, AMPA2 (alpha 2)                            |
| glutamate receptor, ionotropic, AMPA2 (alpha 2)                            |
| colony stimulating factor 2 (granulocyte-macrophage)                       |
| protein kinase C and casein kinase substrate in neurons 1                  |
| solute carrier family 29 (nucleoside transporters), member 2               |
| RIKEN cDNA E230017H14 gene                                                 |
| N-ethylmaleimide sensitive fusion protein attachment protein beta          |
| formin 1                                                                   |
| interleukin 3 receptor, alpha chain                                        |
| Notch gene homolog 3 (Drosophila)                                          |
| ---                                                                        |
| forkhead box O3a                                                           |
| fyn-related kinase                                                         |
| leukemia inhibitory factor                                                 |
| LIM homeobox protein 1                                                     |
| CD40 antigen                                                               |
| WD repeat domain 81                                                        |
| cholinergic receptor, nicotinic, epsilon polypeptide                       |
| cholinergic receptor, nicotinic, epsilon polypeptide                       |
| cholinergic receptor, nicotinic, epsilon polypeptide                       |
| ADP-ribosylation factor 5                                                  |
| discoidin domain receptor family, member 2                                 |
| homeo box A10                                                              |
| ---                                                                        |
| pre-B lymphocyte gene 1                                                    |
| zinc finger protein 37                                                     |
| SH3-domain binding protein 2                                               |
| Norrie disease homolog                                                     |
| H6 homeo box 3                                                             |
| serine (or cysteine) peptidase inhibitor, clade B, member 2                |
| ets variant gene 4 (E1A enhancer binding protein, E1AF)                    |

|                                                                                                                                                                                                             |
|-------------------------------------------------------------------------------------------------------------------------------------------------------------------------------------------------------------|
| ---                                                                                                                                                                                                         |
| secretogranin II                                                                                                                                                                                            |
| bone morphogenetic protein 8a                                                                                                                                                                               |
| protein tyrosine phosphatase, receptor type, J /// similar to protein tyrosine phosphatase, receptor type, J /// similar to protein tyrosine phosphatase, receptor type, J                                  |
| protein tyrosine phosphatase, receptor type, J                                                                                                                                                              |
| protein tyrosine phosphatase, receptor type, J                                                                                                                                                              |
| protein tyrosine phosphatase, receptor type, J /// expressed sequence AW125753                                                                                                                              |
| solute carrier family 4 (anion exchanger), member 3                                                                                                                                                         |
| Ca<2+>dependent activator protein for secretion                                                                                                                                                             |
| Ca<2+>dependent activator protein for secretion                                                                                                                                                             |
| zinc finger protein 93                                                                                                                                                                                      |
| trans-acting transcription factor 4                                                                                                                                                                         |
| trans-acting transcription factor 4                                                                                                                                                                         |
| trans-acting transcription factor 4                                                                                                                                                                         |
| lactalbumin, alpha                                                                                                                                                                                          |
| visinin-like 1                                                                                                                                                                                              |
| SRY-box containing gene 17                                                                                                                                                                                  |
| SRY-box containing gene 17                                                                                                                                                                                  |
| Vav2 oncogene                                                                                                                                                                                               |
| sine oculis-related homeobox 4 homolog (Drosophila)                                                                                                                                                         |
| sine oculis-related homeobox 4 homolog (Drosophila)                                                                                                                                                         |
| sine oculis-related homeobox 4 homolog (Drosophila)                                                                                                                                                         |
| teratocarcinoma-derived growth factor                                                                                                                                                                       |
| cDNA sequence BC018242                                                                                                                                                                                      |
| synaptotagmin I                                                                                                                                                                                             |
| nuclear factor I/C                                                                                                                                                                                          |
| neuropeptide Y receptor Y1                                                                                                                                                                                  |
| LSM4 homolog, U6 small nuclear RNA associated (S. cerevisiae)                                                                                                                                               |
| glutathione S-transferase, mu 2                                                                                                                                                                             |
| polyglutamine binding protein 1                                                                                                                                                                             |
| gamma-aminobutyric acid (GABA(A)) receptor-associated protein-like 1                                                                                                                                        |
| translin                                                                                                                                                                                                    |
| inhibitor of DNA binding 2                                                                                                                                                                                  |
| ATP synthase, H+ transporting, mitochondrial F0 complex, subunit g                                                                                                                                          |
| glutathione S-transferase, alpha 3                                                                                                                                                                          |
| tyrosine 3-monooxygenase/tryptophan 5-monooxygenase activation protein, theta polypeptide /// similar to 14-3-3 protein theta (14-3-3 protein tau) /// similar to 14-3-3 protein theta (14-3-3 protein tau) |
| ---                                                                                                                                                                                                         |
| interferon induced transmembrane protein 2 /// similar to interferon induced transmembrane protein 2                                                                                                        |
| H2A histone family, member X                                                                                                                                                                                |
| brain expressed gene 1                                                                                                                                                                                      |
| brain expressed gene 4                                                                                                                                                                                      |
| histone 1, H3f                                                                                                                                                                                              |
| histone 1, H3g /// histone 1, H3f /// histone1, H3c /// histone1, H3d /// histone 1, H3b /// histone 1, H3e /// histone 1, H3h /// histone 1, H3i /// histone 1, H3a                                        |
| histone 1, H3g                                                                                                                                                                                              |
| Nedd4 family interacting protein 1                                                                                                                                                                          |
| microsomal glutathione S-transferase 1                                                                                                                                                                      |
| Ribosomal protein S13                                                                                                                                                                                       |
| H19 fetal liver mRNA                                                                                                                                                                                        |
| isocitrate dehydrogenase 3 (NAD+), gamma                                                                                                                                                                    |
| ribosomal protein S27a                                                                                                                                                                                      |
| ubiquitin-conjugating enzyme E2E 3, UBC4/5 homolog (yeast)                                                                                                                                                  |
| annexin A1                                                                                                                                                                                                  |
| annexin A1                                                                                                                                                                                                  |

|                                                                                                                                                                                                                                                                                             |
|---------------------------------------------------------------------------------------------------------------------------------------------------------------------------------------------------------------------------------------------------------------------------------------------|
| plasma glutamate carboxypeptidase                                                                                                                                                                                                                                                           |
| FXYP domain-containing ion transport regulator 1                                                                                                                                                                                                                                            |
| minichromosome maintenance deficient 4 homolog (S. cerevisiae)                                                                                                                                                                                                                              |
| benzodiazepine receptor, peripheral                                                                                                                                                                                                                                                         |
| neuroplastin                                                                                                                                                                                                                                                                                |
| ATP-binding cassette, sub-family D (ALD), member 3                                                                                                                                                                                                                                          |
| nucleoporin 50                                                                                                                                                                                                                                                                              |
| nucleoporin 50                                                                                                                                                                                                                                                                              |
| caseinolytic peptidase, ATP-dependent, proteolytic subunit homolog (E. coli)                                                                                                                                                                                                                |
| myosin, light polypeptide 2, regulatory, cardiac, slow                                                                                                                                                                                                                                      |
| epoxide hydrolase 2, cytoplasmic                                                                                                                                                                                                                                                            |
| calsequestrin 2                                                                                                                                                                                                                                                                             |
| ankyrin repeat domain 46                                                                                                                                                                                                                                                                    |
| ankyrin repeat domain 46                                                                                                                                                                                                                                                                    |
| ankyrin repeat domain 46                                                                                                                                                                                                                                                                    |
| basic transcription factor 3                                                                                                                                                                                                                                                                |
| eukaryotic translation initiation factor 1A                                                                                                                                                                                                                                                 |
| RIKEN cDNA 2610204K14 gene                                                                                                                                                                                                                                                                  |
| integrin alpha 7                                                                                                                                                                                                                                                                            |
| mitochondrial ribosomal protein L39                                                                                                                                                                                                                                                         |
| amyloid beta (A4) precursor protein                                                                                                                                                                                                                                                         |
| BCL2/adenovirus E1B interacting protein 1, NIP2                                                                                                                                                                                                                                             |
| interleukin 11 receptor, alpha chain 1                                                                                                                                                                                                                                                      |
| granulin                                                                                                                                                                                                                                                                                    |
| histone 2, H3c1 /// histone 2, H2aa1 /// histone 2, H2aa2 /// similar to H2A histone family, member O /// similar to H2A histone family, member O /// similar to H2A histone family, member O                                                                                               |
| histone 2, H3c1                                                                                                                                                                                                                                                                             |
| ubiquitin-conjugating enzyme E2D 2                                                                                                                                                                                                                                                          |
| RAN binding protein 5                                                                                                                                                                                                                                                                       |
| tripartite motif protein 28                                                                                                                                                                                                                                                                 |
| cyclic nucleotide phosphodiesterase 1                                                                                                                                                                                                                                                       |
| nuclear factor of activated T-cells, cytoplasmic, calcineurin-dependent 2                                                                                                                                                                                                                   |
| nuclear factor of activated T-cells, cytoplasmic, calcineurin-dependent 2                                                                                                                                                                                                                   |
| nuclear factor of activated T-cells, cytoplasmic, calcineurin-dependent 2                                                                                                                                                                                                                   |
| casein kinase 1, alpha 1                                                                                                                                                                                                                                                                    |
| lymphocyte antigen 6 complex, locus C                                                                                                                                                                                                                                                       |
| lymphocyte antigen 6 complex, locus A                                                                                                                                                                                                                                                       |
| Bernardinelli-Seip congenital lipodystrophy 2 homolog (human)                                                                                                                                                                                                                               |
| retinoblastoma binding protein 7                                                                                                                                                                                                                                                            |
| zinc finger, A20 domain containing 3                                                                                                                                                                                                                                                        |
| annexin A5                                                                                                                                                                                                                                                                                  |
| solute carrier family 25 (mitochondrial carrier, adenine nucleotide translocator), member 4                                                                                                                                                                                                 |
| proteosome (prosome, macropain) subunit, beta type 9 (large multifunctional peptidase 2)                                                                                                                                                                                                    |
| immunoglobulin kappa chain variable 28 (V28) /// immunoglobulin kappa chain variable 8 (V8)-16                                                                                                                                                                                              |
| ubiquitin specific peptidase 25                                                                                                                                                                                                                                                             |
| beta-2 microglobulin                                                                                                                                                                                                                                                                        |
| eukaryotic translation initiation factor 4A2                                                                                                                                                                                                                                                |
| fibroblast growth factor receptor 2                                                                                                                                                                                                                                                         |
| fibroblast growth factor receptor 2                                                                                                                                                                                                                                                         |
| histocompatibility 2, class II, locus DMA                                                                                                                                                                                                                                                   |
| myeloid cell leukemia sequence 1                                                                                                                                                                                                                                                            |
| cerebellar degeneration-related 2                                                                                                                                                                                                                                                           |
| high mobility group box 1 /// similar to High mobility group protein 1 (HMG-1) (High mobility group protein B1) (Amphoterin) (Heparin-binding protein p30) /// similar to High mobility group protein 1 (HMG-1) (High mobility group protein B1) (Amphoterin) (Heparin-binding protein p30) |
| fibrinogen, gamma polypeptide                                                                                                                                                                                                                                                               |



|                                                                                                                                                                                                                                                                                                                                                                                                                                                               |
|---------------------------------------------------------------------------------------------------------------------------------------------------------------------------------------------------------------------------------------------------------------------------------------------------------------------------------------------------------------------------------------------------------------------------------------------------------------|
| arginase 1, liver                                                                                                                                                                                                                                                                                                                                                                                                                                             |
| ribosomal protein L35                                                                                                                                                                                                                                                                                                                                                                                                                                         |
| polo-like kinase 1 (Drosophila)                                                                                                                                                                                                                                                                                                                                                                                                                               |
| actin, alpha 2, smooth muscle, aorta                                                                                                                                                                                                                                                                                                                                                                                                                          |
| neural precursor cell expressed, developmentally down-regulted gene 4                                                                                                                                                                                                                                                                                                                                                                                         |
| actin, gamma 2, smooth muscle, enteric                                                                                                                                                                                                                                                                                                                                                                                                                        |
| lactate dehydrogenase C                                                                                                                                                                                                                                                                                                                                                                                                                                       |
| B-cell translocation gene 1, anti-proliferative                                                                                                                                                                                                                                                                                                                                                                                                               |
| T-cell receptor beta, joining region /// T-cell receptor beta, variable 13 /// similar to T-cell receptor beta-1 chain C region /// similar to T-cell receptor beta-2 chain C region /// similar to T-cell receptor beta-1 chain C region /// similar to T-cell receptor beta-1 chain C region /// similar to T-cell receptor beta-1 chain C region /// similar to T-cell receptor beta-2 chain C region /// similar to T-cell receptor beta-1 chain C region |
| T-cell receptor beta, joining region /// similar to T-cell receptor beta-1 chain C region /// similar to T-cell receptor beta-1 chain C region /// similar to T-cell receptor beta-1 chain C region /// similar to T-cell receptor beta-1 chain C region                                                                                                                                                                                                      |
| T-cell receptor beta, joining region /// similar to T-cell receptor beta-1 chain C region /// similar to T-cell receptor beta-1 chain C region /// similar to T-cell receptor beta-1 chain C region /// similar to T-cell receptor beta-1 chain C region                                                                                                                                                                                                      |
| prolyl 4-hydroxylase, beta polypeptide                                                                                                                                                                                                                                                                                                                                                                                                                        |
| serine (or cysteine) peptidase inhibitor, clade A, member 1a /// serine (or cysteine) preptidase inhibitor, clade A, member 1b /// serine (or cysteine) peptidase inhibitor, clade A, member 1c /// serine (or cysteine) peptidase inhibitor, clade A, member 1d                                                                                                                                                                                              |
| karyopherin (importin) beta 1                                                                                                                                                                                                                                                                                                                                                                                                                                 |
| minichromosome maintenance deficient 2 mitotin (S. cerevisiae)                                                                                                                                                                                                                                                                                                                                                                                                |
| ATP synthase, H+ transporting, mitochondrial F0 complex, subunit f, isoform 2                                                                                                                                                                                                                                                                                                                                                                                 |
| protein kinase, cAMP dependent, catalytic, beta                                                                                                                                                                                                                                                                                                                                                                                                               |
| heterogeneous nuclear ribonucleoprotein A2/B1                                                                                                                                                                                                                                                                                                                                                                                                                 |
| heterogeneous nuclear ribonucleoprotein A2/B1                                                                                                                                                                                                                                                                                                                                                                                                                 |
| cytochrome c oxidase, subunit Vb                                                                                                                                                                                                                                                                                                                                                                                                                              |
| histocompatibility 2, K1, K region                                                                                                                                                                                                                                                                                                                                                                                                                            |
| ribosomal protein S24                                                                                                                                                                                                                                                                                                                                                                                                                                         |
| cysteine-rich secretory protein 1                                                                                                                                                                                                                                                                                                                                                                                                                             |
| phosphatidylethanolamine binding protein 1                                                                                                                                                                                                                                                                                                                                                                                                                    |
| creatine kinase, brain                                                                                                                                                                                                                                                                                                                                                                                                                                        |
| similar to 3-phosphoglycerate dehydrogenase                                                                                                                                                                                                                                                                                                                                                                                                                   |
| neuropeptide Y receptor Y1                                                                                                                                                                                                                                                                                                                                                                                                                                    |
| cut-like 2 (Drosophila)                                                                                                                                                                                                                                                                                                                                                                                                                                       |
| RIKEN cDNA 2600005C20 gene                                                                                                                                                                                                                                                                                                                                                                                                                                    |
| galactosylceramidase                                                                                                                                                                                                                                                                                                                                                                                                                                          |
| glutamate receptor, ionotropic, kainate 1                                                                                                                                                                                                                                                                                                                                                                                                                     |
| solute carrier family 7 (cationic amino acid transporter, y+ system), member 3                                                                                                                                                                                                                                                                                                                                                                                |
| neuronal pentraxin 1                                                                                                                                                                                                                                                                                                                                                                                                                                          |
| dermatan sulphate proteoglycan 3                                                                                                                                                                                                                                                                                                                                                                                                                              |
| neurotensin receptor 2                                                                                                                                                                                                                                                                                                                                                                                                                                        |
| RIKEN cDNA 2410012H22 gene                                                                                                                                                                                                                                                                                                                                                                                                                                    |
| serine dehydratase-like                                                                                                                                                                                                                                                                                                                                                                                                                                       |
| testis specific X-linked gene                                                                                                                                                                                                                                                                                                                                                                                                                                 |
| nuclear receptor subfamily 0, group B, member 1                                                                                                                                                                                                                                                                                                                                                                                                               |
| BTB and CNC homology 1                                                                                                                                                                                                                                                                                                                                                                                                                                        |
| RIKEN cDNA 1190005I06 gene                                                                                                                                                                                                                                                                                                                                                                                                                                    |
| expressed sequence AI317237                                                                                                                                                                                                                                                                                                                                                                                                                                   |
| GATA zinc finger domain containing 2A                                                                                                                                                                                                                                                                                                                                                                                                                         |
| claudin 8                                                                                                                                                                                                                                                                                                                                                                                                                                                     |
| bruno-like 4, RNA binding protein (Drosophila)                                                                                                                                                                                                                                                                                                                                                                                                                |
| tetratricopeptide repeat domain 17                                                                                                                                                                                                                                                                                                                                                                                                                            |
| copine VI                                                                                                                                                                                                                                                                                                                                                                                                                                                     |
| adenosine deaminase, RNA-specific, B1                                                                                                                                                                                                                                                                                                                                                                                                                         |
| RIKEN cDNA A930004K21 gene                                                                                                                                                                                                                                                                                                                                                                                                                                    |
| RIKEN cDNA 9130206N08 gene                                                                                                                                                                                                                                                                                                                                                                                                                                    |
| synaptotagmin II                                                                                                                                                                                                                                                                                                                                                                                                                                              |
| open reading frame 9                                                                                                                                                                                                                                                                                                                                                                                                                                          |

|                                                                            |
|----------------------------------------------------------------------------|
| gamma-aminobutyric acid (GABA-A) receptor, subunit gamma 2                 |
| ring finger protein 2                                                      |
| LysM, putative peptidoglycan-binding, domain containing 1                  |
| PREDICTED: Mus musculus hypothetical protein LOC626765 (LOC626765), mRNA   |
| oxidized low density lipoprotein (lectin-like) receptor 1                  |
| expressed sequence AV344025                                                |
| ---                                                                        |
| solute carrier family 39 (zinc transporter), member 3                      |
| CD276 antigen                                                              |
| RIKEN cDNA A130022J15 gene                                                 |
| Transcribed locus                                                          |
| neuronal guanine nucleotide exchange factor                                |
| transmembrane protein 62                                                   |
| expressed sequence AI506816                                                |
| UPF2 regulator of nonsense transcripts homolog (yeast)                     |
| NK6 transcription factor related, locus 2 (Drosophila)                     |
| CDC91 cell division cycle 91-like 1 (S. cerevisiae)                        |
| transducin (beta)-like 2                                                   |
| expressed sequence AU021092                                                |
| CXXC finger 6                                                              |
| tripartite motif protein 47                                                |
| dickkopf homolog 3 (Xenopus laevis)                                        |
| cDNA sequence BC053401                                                     |
| vesicle-associated membrane protein 4                                      |
| adrenergic receptor, beta 2                                                |
| lymphocyte antigen 9                                                       |
| malignant fibrous histiocytooma amplified sequence 1                       |
| Vacuolar protein sorting 37A (yeast)                                       |
| lymphocyte antigen 6 complex, locus G6C                                    |
| colony stimulating factor 3 receptor (granulocyte)                         |
| ---                                                                        |
| DNA segment, Chr 1, Pasteur Institute 1                                    |
| DNA segment, Chr 1, Pasteur Institute 1                                    |
| 5' nucleotidase, ecto                                                      |
| forkhead box N2                                                            |
| forkhead box N2                                                            |
| adenosine deaminase                                                        |
| adenosine deaminase                                                        |
| preproacrosin                                                              |
| protease, serine, 3 /// protease, serine, 1 (trypsin 1) /// trypsinogen 12 |
| NIMA (never in mitosis gene a)-related expressed kinase 4                  |
| NIMA (never in mitosis gene a)-related expressed kinase 4                  |
| DnaJ (Hsp40) homolog, subfamily C, member 5                                |
| protein tyrosine phosphatase-like A domain containing 1                    |
| Similar to immunoglobulin light chain variable region                      |
| calcium/calmodulin-dependent protein kinase II, delta                      |
| tumor necrosis factor, alpha-induced protein 1 (endothelial)               |
| fibroblast growth factor 2                                                 |
| F-box protein 45                                                           |
| SWA-70 protein                                                             |
| acid phosphatase 1, soluble                                                |
| procollagen, type IV, alpha 5                                              |
| homeo box D8                                                               |

|                                                                                                                                                                                                             |
|-------------------------------------------------------------------------------------------------------------------------------------------------------------------------------------------------------------|
| retinoblastoma binding protein 9 /// similar to Retinoblastoma-binding protein 9 (RBBP-9) (B5T overexpressed gene protein) (Bog protein)                                                                    |
| similar to T-cell receptor alpha chain V region CTL-F3 precursor                                                                                                                                            |
| T-cell receptor alpha, variable 8                                                                                                                                                                           |
| cytochrome P450, family 21, subfamily a, polypeptide 1 /// similar to Cytochrome P450 XXI (Steroid 21-hydroxylase) (21-OHase) (P450-C21) (P-450c21)                                                         |
| immunoglobulin heavy chain 1a (serum IgG2a) /// anti-lipoteichoic acid heavy chain variable region /// similar to Ig heavy chain V-III region VH26 precursor                                                |
| similar to Ig kappa chain V-IV region precursor /// similar to Ig kappa chain V-IV region precursor /// similar to Ig kappa chain V-IV region precursor /// similar to Ig kappa chain V-IV region precursor |
| helicase, lymphoid specific                                                                                                                                                                                 |
| neurogenin 1                                                                                                                                                                                                |
| hypermethylated in cancer 1                                                                                                                                                                                 |
| transmembrane protein 141                                                                                                                                                                                   |
| musculin                                                                                                                                                                                                    |
| expressed sequence BB128963                                                                                                                                                                                 |
| thymidylate synthase /// thymidylate synthase, pseudogene                                                                                                                                                   |
| thymidylate synthase, pseudogene                                                                                                                                                                            |
| dehydrogenase/reductase (SDR family) X chromosome                                                                                                                                                           |
| UPF3 regulator of nonsense transcripts homolog B (yeast)                                                                                                                                                    |
| UPF3 regulator of nonsense transcripts homolog B (yeast)                                                                                                                                                    |
| protamine 3                                                                                                                                                                                                 |
| bone morphogenetic protein 7                                                                                                                                                                                |
| RIKEN cDNA 5730502D15 gene                                                                                                                                                                                  |
| preferentially expressed antigen in melanoma like 7                                                                                                                                                         |
| NMDA receptor-regulated gene 1                                                                                                                                                                              |
| thymocyte nuclear protein 1                                                                                                                                                                                 |
| high mobility group box 2 /// high mobility group box 2 /// high mobility group box 2                                                                                                                       |
| 4-nitrophenylphosphatase domain and non-neuronal SNAP25-like protein homolog 1 (C. elegans)                                                                                                                 |
| B-cell receptor-associated protein 31                                                                                                                                                                       |
| mitogen activated protein kinase 1                                                                                                                                                                          |
| mitogen activated protein kinase 1                                                                                                                                                                          |
| ralA binding protein 1                                                                                                                                                                                      |
| golgi autoantigen, golgin subfamily a, 7 /// similar to golgi autoantigen, golgin subfamily a, 7                                                                                                            |
| DEAD (Asp-Glu-Ala-Asp) box polypeptide 1                                                                                                                                                                    |
| hydroxymethylbilane synthase                                                                                                                                                                                |
| troponin C2, fast                                                                                                                                                                                           |
| legumain                                                                                                                                                                                                    |
| sterol regulatory element binding factor 1                                                                                                                                                                  |
| tropomyosin 3, gamma                                                                                                                                                                                        |
| tropomyosin 3, gamma                                                                                                                                                                                        |
| RNA-binding region (RNP1, RRM) containing 2                                                                                                                                                                 |
| glyoxalase 1                                                                                                                                                                                                |
| glyoxalase 1                                                                                                                                                                                                |
| glycyl-tRNA synthetase                                                                                                                                                                                      |
| GNAS (guanine nucleotide binding protein, alpha stimulating) complex locus                                                                                                                                  |
| serine/threonine kinase 16                                                                                                                                                                                  |
| synuclein, alpha                                                                                                                                                                                            |
| CDC-like kinase 1                                                                                                                                                                                           |
| SH3-domain GRB2-like 1                                                                                                                                                                                      |
| hematological and neurological expressed sequence 1                                                                                                                                                         |
| heat shock protein 1 (chaperonin)                                                                                                                                                                           |
| sterol carrier protein 2, liver                                                                                                                                                                             |
| crystallin, alpha B                                                                                                                                                                                         |
| reticulocalbin 2                                                                                                                                                                                            |
| adenine phosphoribosyl transferase                                                                                                                                                                          |
| adenine phosphoribosyl transferase                                                                                                                                                                          |

|                                                                                                                               |
|-------------------------------------------------------------------------------------------------------------------------------|
| cold inducible RNA binding protein                                                                                            |
| dual specificity phosphatase 6                                                                                                |
| Bcl2-interacting killer                                                                                                       |
| actin related protein 2/3 complex, subunit 2                                                                                  |
| purine-nucleoside phosphorylase /// similar to purine-nucleoside phosphorylase /// similar to purine-nucleoside phosphorylase |
| calmodulin 2                                                                                                                  |
| connective tissue growth factor                                                                                               |
| chaperonin subunit 5 (epsilon)                                                                                                |
| T-cell lymphoma breakpoint 1                                                                                                  |
| 3'-phosphoadenosine 5'-phosphosulfate synthase 1                                                                              |
| mutS homolog 6 (E. coli) /// similar to mutS homolog 6                                                                        |
| transforming growth factor, beta 2                                                                                            |
| RIKEN cDNA 1300007B12 gene                                                                                                    |
| trefoil factor 2 (spasmolytic protein 1)                                                                                      |
| ubiquitin fusion degradation 1 like                                                                                           |
| ---                                                                                                                           |
| vesicle-associated membrane protein 8                                                                                         |
| microtubule-associated protein, RP/EB family, member 1                                                                        |
| pyruvate carboxylase                                                                                                          |
| DEAD/H (Asp-Glu-Ala-Asp/His) box polypeptide 3, X-linked                                                                      |
| proteasome (prosome, macropain) 26S subunit, ATPase, 6                                                                        |
| CDC-like kinase 3                                                                                                             |
| ubiquitin-conjugating enzyme E2G 1 (UBC7 homolog, C. elegans)                                                                 |
| mitogen activated protein kinase kinase 3                                                                                     |
| mitogen activated protein kinase kinase 3                                                                                     |
| mitogen activated protein kinase kinase 3                                                                                     |
| oxysterol binding protein-like 1A                                                                                             |
| oxysterol binding protein-like 1A                                                                                             |
| ninjurin 1                                                                                                                    |
| RAS p21 protein activator 3                                                                                                   |
| carnitine palmitoyltransferase 1a, liver                                                                                      |
| interferon activated gene 203                                                                                                 |
| PTEN induced putative kinase 1                                                                                                |
| proteolipid protein 2                                                                                                         |
| zinc finger protein 36, C3H type-like 1                                                                                       |
| polymerase (RNA) II (DNA directed) polypeptide E                                                                              |
| tetraspanin 7                                                                                                                 |
| Tax1 (human T-cell leukemia virus type I) binding protein 3                                                                   |
| histidine decarboxylase                                                                                                       |
| aquaporin 1                                                                                                                   |
| CD36 antigen                                                                                                                  |
| tubulin cofactor a                                                                                                            |
| acyl-Coenzyme A dehydrogenase, very long chain                                                                                |
| transmembrane emp24-like trafficking protein 10 (yeast)                                                                       |
| vacuolar protein sorting 4b (yeast)                                                                                           |
| transformed mouse 3T3 cell double minute 4                                                                                    |
| transformed mouse 3T3 cell double minute 4                                                                                    |
| coatomer protein complex, subunit beta 2 (beta prime)                                                                         |
| coatomer protein complex, subunit beta 2 (beta prime)                                                                         |
| Mki67 (FHA domain) interacting nucleolar phosphoprotein                                                                       |
| phosphoglycerate kinase 1                                                                                                     |
| RAB24, member RAS oncogene family                                                                                             |
| translocase of inner mitochondrial membrane 22 homolog (yeast)                                                                |

|                                                                                      |
|--------------------------------------------------------------------------------------|
| procollagen C-endopeptidase enhancer protein                                         |
| zinc finger protein 422                                                              |
| hydroxyprostaglandin dehydrogenase 15 (NAD)                                          |
| transglutaminase 2, C polypeptide                                                    |
| lumican                                                                              |
| apolipoprotein C-I                                                                   |
| glutamate oxaloacetate transaminase 2, mitochondrial                                 |
| minichromosome maintenance deficient 7 (S. cerevisiae)                               |
| eukaryotic translation initiation factor 1A, Y-linked                                |
| NADH dehydrogenase (ubiquinone) 1, subcomplex unknown, 2                             |
| phosphomannomutase 1                                                                 |
| adaptor protein complex AP-2, mu1                                                    |
| catenin (cadherin associated protein), alpha 1                                       |
| SGT1, suppressor of G2 allele of SKP1 (S. cerevisiae)                                |
| SGT1, suppressor of G2 allele of SKP1 (S. cerevisiae)                                |
| telomerase associated protein 1                                                      |
| osteomodulin                                                                         |
| ---                                                                                  |
| basonuclin 1                                                                         |
| acidic (leucine-rich) nuclear phosphoprotein 32 family, member A                     |
| alpha-N-acetylglucosaminidase (Sanfilippo disease IIIB)                              |
| junctophilin 3                                                                       |
| R-spondin 2 homolog (Xenopus laevis)                                                 |
| BMP2 inducible kinase                                                                |
| homeo box C8                                                                         |
| dihydropyrimidinase-like 4                                                           |
| killer cell lectin-like receptor subfamily B member 1C                               |
| arginine vasopressin                                                                 |
| phosphodiesterase 1B, Ca2+-calmodulin dependent                                      |
| procollagen, type VII, alpha 1                                                       |
| syntrophin, basic 1                                                                  |
| nth (endonuclease III)-like 1 (E.coli)                                               |
| acyl-malonyl condensing enzyme 1                                                     |
| keratocan                                                                            |
| Spi-B transcription factor (Spi-1/PU.1 related)                                      |
| prominin 1                                                                           |
| prominin 1                                                                           |
| crystallin, gamma S                                                                  |
| uncoupling protein 3 (mitochondrial, proton carrier)                                 |
| ectodysplasin-A                                                                      |
| ectodysplasin-A /// similar to Ectodysplasin-A (EDA protein homolog) (Tabby protein) |
| ectodysplasin-A /// similar to Ectodysplasin-A (EDA protein homolog) (Tabby protein) |
| solute carrier family 4 (anion exchanger), member 1, adaptor protein                 |
| chemokine (C-C motif) receptor 2                                                     |
| U2 small nuclear ribonucleoprotein auxiliary factor (U2AF) 1, related sequence 2     |
| retinoic acid induced 2                                                              |
| baculoviral IAP repeat-containing 4                                                  |
| baculoviral IAP repeat-containing 4                                                  |
| baculoviral IAP repeat-containing 4                                                  |
| ATPase, Ca++ transporting, ubiquitous                                                |
| ATPase, Ca++ transporting, ubiquitous                                                |
| E2F transcription factor 3                                                           |
| v-maf musculoaponeurotic fibrosarcoma oncogene family, protein G (avian)             |

|                                                                                   |
|-----------------------------------------------------------------------------------|
| ATP-binding cassette, sub-family C (CFTR/MRP), member 6                           |
| Transcribed locus                                                                 |
| ---                                                                               |
| WNK lysine deficient protein kinase 2                                             |
| sema domain, immunoglobulin domain (Ig), and GPI membrane anchor, (semaphorin) 7A |
| Duffy blood group, chemokine receptor                                             |
| telomeric repeat binding factor 2                                                 |
| ATP-binding cassette, sub-family B (MDR/TAP), member 1B                           |
| tumor necrosis factor (ligand) superfamily, member 11                             |
| myocyte enhancer factor 2B                                                        |
| myocyte enhancer factor 2B                                                        |
| RIKEN cDNA 1110061O04 gene                                                        |
| PFTAIRE protein kinase 1                                                          |
| PFTAIRE protein kinase 1                                                          |
| leucine zipper, down-regulated in cancer 1-like                                   |
| pam, highwire, rpm 1                                                              |
| interferon regulatory factor 5                                                    |
| RIKEN cDNA D530031C13 gene                                                        |
| myosin ID                                                                         |
| RIKEN cDNA 2610300B10 gene                                                        |
| zona pellucida glycoprotein 2                                                     |
| chemokine orphan receptor 1                                                       |
| dystrophia myotonica-protein kinase                                               |
| zinc finger protein (C2H2 type) 276                                               |
| asialoglycoprotein receptor 1                                                     |
| sulfotransferase family 5A, member 1                                              |
| cytochrome P450, family 24, subfamily a, polypeptide 1                            |
| RIKEN cDNA 4632419I22 gene                                                        |
| RIKEN cDNA 4632419I22 gene                                                        |
| ---                                                                               |
| SEC22 vesicle trafficking protein homolog B (S. cerevisiae)                       |
| RIKEN cDNA 2700099C18 gene                                                        |
| zinc finger protein 316                                                           |
| fibronectin type III domain containing 1                                          |
| basic leucine zipper transcription factor, ATF-like                               |
| CD5 antigen-like                                                                  |
| zinc finger protein 60                                                            |
| ---                                                                               |
| RIKEN cDNA E330036I19 gene                                                        |
| ret finger protein-like 4                                                         |
| centromere protein E                                                              |
| LIM domain only 7                                                                 |
| cerberus 1 homolog (Xenopus laevis)                                               |
| rod outer segment membrane protein 1                                              |
| CD93 antigen                                                                      |
| bone morphogenetic protein 4                                                      |
| bone morphogenetic protein 4                                                      |
| crystallin, gamma B                                                               |
| RIKEN cDNA C330003B14 gene                                                        |
| frizzled homolog 4 (Drosophila)                                                   |
| activin A receptor, type 1                                                        |
| baculoviral IAP repeat-containing 1a                                              |
| RIKEN cDNA 1810054D07 gene                                                        |

|                                                                               |
|-------------------------------------------------------------------------------|
| ubiquitin specific peptidase 19                                               |
| A kinase (PRKA) anchor protein (yotiao) 9                                     |
| RIKEN cDNA 9130211I03 gene                                                    |
| exocyst complex component 4                                                   |
| cache domain containing 1                                                     |
| AF4/FMR2 family, member 1                                                     |
| Eph receptor B3                                                               |
| DNA methyltransferase 2                                                       |
| Solute carrier family 4, sodium bicarbonate cotransporter, member 7           |
| Procollagen, type V, alpha 1                                                  |
| sperm flagellar 1                                                             |
| protein kinase, DNA activated, catalytic polypeptide                          |
| RIKEN cDNA 4930461P20 gene                                                    |
| RIKEN cDNA A930031D07 gene                                                    |
| HtrA serine peptidase 3                                                       |
| myosin, heavy polypeptide 14 /// similar to nonmuscle myosin heavy chain      |
| myosin, light polypeptide kinase                                              |
| hemopoietic cell kinase                                                       |
| GRAM domain containing 3                                                      |
| protein tyrosine phosphatase, receptor type, D                                |
| solute carrier family 27 (fatty acid transporter), member 1                   |
| TSR1, 20S rRNA accumulation, homolog (yeast)                                  |
| glutamate oxaloacetate transaminase 1, soluble                                |
| MAF1 homolog (S. cerevisiae)                                                  |
| ubiquitin-conjugating enzyme E2D 3 (UBC4/5 homolog, yeast)                    |
| pleckstrin homology, Sec7 and coiled-coil domains 2                           |
| DEAD (Asp-Glu-Ala-Asp) box polypeptide 5                                      |
| peroxiredoxin 4                                                               |
| ELOVL family member 5, elongation of long chain fatty acids (yeast)           |
| complement component 3                                                        |
| amyloid beta (A4) precursor-like protein 2                                    |
| capping protein (actin filament) muscle Z-line, alpha 1                       |
| aminolevulinic acid synthase 1                                                |
| succinate-Coenzyme A ligase, ADP-forming, beta subunit                        |
| succinate-Coenzyme A ligase, ADP-forming, beta subunit                        |
| secreted frizzled-related protein 2                                           |
| methionine aminopeptidase 2                                                   |
| solute carrier family 25 (mitochondrial carrier, phosphate carrier), member 3 |
| tissue inhibitor of metalloproteinase 2                                       |
| ubiquitin-conjugating enzyme E2B, RAD6 homology (S. cerevisiae)               |
| integral membrane protein 2A                                                  |
| adenosine kinase                                                              |
| ribosomal protein L35a                                                        |
| myosin, light polypeptide 3                                                   |
| cadherin 16                                                                   |
| dynein light chain Tctex-type 1                                               |
| procollagen, type VI, alpha 2                                                 |
| ribonucleic acid binding protein S1                                           |
| neural precursor cell expressed, developmentally down-regulated gene 8        |
| serine/arginine repetitive matrix 1                                           |
| serine/arginine repetitive matrix 1                                           |
| RAD9 homolog (S. pombe)                                                       |
| calreticulin                                                                  |

|                                                                                                                                                                                                                                                                                                                                                                                                                                                  |
|--------------------------------------------------------------------------------------------------------------------------------------------------------------------------------------------------------------------------------------------------------------------------------------------------------------------------------------------------------------------------------------------------------------------------------------------------|
| Ubiquitin-conjugating enzyme E2, J2 homolog (yeast)                                                                                                                                                                                                                                                                                                                                                                                              |
| ubiquitin-conjugating enzyme E2, J2 homolog (yeast) /// ubiquitin-conjugating enzyme E2, J2 homolog pseudogene                                                                                                                                                                                                                                                                                                                                   |
| stimulated by retinoic acid 13                                                                                                                                                                                                                                                                                                                                                                                                                   |
| Kruppel-like factor 9                                                                                                                                                                                                                                                                                                                                                                                                                            |
| Kruppel-like factor 9                                                                                                                                                                                                                                                                                                                                                                                                                            |
| integrin alpha FG-GAP repeat containing 1                                                                                                                                                                                                                                                                                                                                                                                                        |
| ---                                                                                                                                                                                                                                                                                                                                                                                                                                              |
| NADH dehydrogenase (ubiquinone) 1 alpha subcomplex, 8                                                                                                                                                                                                                                                                                                                                                                                            |
| troponin I, skeletal, fast 2                                                                                                                                                                                                                                                                                                                                                                                                                     |
| Ssu72 RNA polymerase II CTD phosphatase homolog (yeast)                                                                                                                                                                                                                                                                                                                                                                                          |
| decorin                                                                                                                                                                                                                                                                                                                                                                                                                                          |
| ataxin 2                                                                                                                                                                                                                                                                                                                                                                                                                                         |
| Bcl2-associated X protein                                                                                                                                                                                                                                                                                                                                                                                                                        |
| Traf and Tnf receptor associated protein                                                                                                                                                                                                                                                                                                                                                                                                         |
| anaphase promoting complex subunit 13                                                                                                                                                                                                                                                                                                                                                                                                            |
| ADP-ribosylarginine hydrolase                                                                                                                                                                                                                                                                                                                                                                                                                    |
| transgelin                                                                                                                                                                                                                                                                                                                                                                                                                                       |
| phosphotriesterase related                                                                                                                                                                                                                                                                                                                                                                                                                       |
| glutathione S-transferase, mu 1                                                                                                                                                                                                                                                                                                                                                                                                                  |
| core binding factor beta                                                                                                                                                                                                                                                                                                                                                                                                                         |
| core binding factor beta                                                                                                                                                                                                                                                                                                                                                                                                                         |
| Sec61 beta subunit                                                                                                                                                                                                                                                                                                                                                                                                                               |
| cysteine and glycine-rich protein 2                                                                                                                                                                                                                                                                                                                                                                                                              |
| polymerase (RNA) II (DNA directed) polypeptide L                                                                                                                                                                                                                                                                                                                                                                                                 |
| keratin complex 2, basic, gene 10                                                                                                                                                                                                                                                                                                                                                                                                                |
| keratin complex 2, basic, gene 10                                                                                                                                                                                                                                                                                                                                                                                                                |
| selenophosphate synthetase 2                                                                                                                                                                                                                                                                                                                                                                                                                     |
| solute carrier family 35 (UDP-galactose transporter), member 2                                                                                                                                                                                                                                                                                                                                                                                   |
| apurinic/apyrimidinic endonuclease 1                                                                                                                                                                                                                                                                                                                                                                                                             |
| acylphosphatase 1, erythrocyte (common) type                                                                                                                                                                                                                                                                                                                                                                                                     |
| coiled-coil-helix-coiled-coil-helix domain containing 6                                                                                                                                                                                                                                                                                                                                                                                          |
| NADH dehydrogenase (ubiquinone) 1 beta subcomplex 3                                                                                                                                                                                                                                                                                                                                                                                              |
| nidogen 2                                                                                                                                                                                                                                                                                                                                                                                                                                        |
| tyrosyl-tRNA synthetase                                                                                                                                                                                                                                                                                                                                                                                                                          |
| kinesin 2                                                                                                                                                                                                                                                                                                                                                                                                                                        |
| galactose-4-epimerase, UDP                                                                                                                                                                                                                                                                                                                                                                                                                       |
| profilin 2                                                                                                                                                                                                                                                                                                                                                                                                                                       |
| hypothetical protein LOC544988 /// hypothetical protein LOC545007 /// RIKEN cDNA 2610042L04 gene /// hypothetical protein LOC554327 /// similar to Spetex-2F protein /// similar to Spetex-2H protein /// similar to Spetex-2H protein /// similar to Spetex-2F protein /// similar to Spetex-2H protein /// similar to Spetex-2H protein /// similar to Spetex-2H protein /// hypothetical protein LOC666772 /// hypothetical protein LOC671957 |
| hypothetical protein LOC544988 /// RIKEN cDNA B930046C15 gene /// hypothetical protein LOC545007 /// RIKEN cDNA 2610042L04 gene /// hypothetical protein LOC554327 /// similar to Spetex-2F protein /// similar to Spetex-2H protein /// similar to Spetex-2H protein /// hypothetical protein LOC666740 /// hypothetical protein LOC666772                                                                                                      |
| solute carrier family 12, member 3                                                                                                                                                                                                                                                                                                                                                                                                               |
| spectrin beta 2                                                                                                                                                                                                                                                                                                                                                                                                                                  |
| NADH dehydrogenase (ubiquinone) Fe-S protein 1                                                                                                                                                                                                                                                                                                                                                                                                   |
| metallothionein 1                                                                                                                                                                                                                                                                                                                                                                                                                                |
| serine (or cysteine) peptidase inhibitor, clade F, member 1                                                                                                                                                                                                                                                                                                                                                                                      |
| gamma-glutamyl hydrolase /// similar to Gamma-glutamyl hydrolase precursor (Gamma-Glu-x carboxypeptidase) (Conjugase) (GH) (Folypolyglutamate hydrolase) (FGPH)                                                                                                                                                                                                                                                                                  |
| Ribosomal protein L15                                                                                                                                                                                                                                                                                                                                                                                                                            |
| jagunal homolog 1 (Drosophila)                                                                                                                                                                                                                                                                                                                                                                                                                   |
| pumilio 2 (Drosophila)                                                                                                                                                                                                                                                                                                                                                                                                                           |
| NADH dehydrogenase (ubiquinone) 1 beta subcomplex 8                                                                                                                                                                                                                                                                                                                                                                                              |
| demethyl-Q 7                                                                                                                                                                                                                                                                                                                                                                                                                                     |
| immunoglobulin heavy chain 6 (heavy chain of IgM)                                                                                                                                                                                                                                                                                                                                                                                                |
| immunoglobulin heavy chain 6 (heavy chain of IgM)                                                                                                                                                                                                                                                                                                                                                                                                |



|                                                                            |
|----------------------------------------------------------------------------|
| cytochrome P450, family 2, subfamily c, polypeptide 29                     |
| synaptogyrin 2                                                             |
| annexin A7                                                                 |
| gene trap locus 3                                                          |
| ectonucleoside triphosphate diphosphohydrolase 4                           |
| N-deacetylase/N-sulfotransferase (heparan glucosaminyI) 1                  |
| penta-EF hand domain containing 1                                          |
| apolipoprotein D                                                           |
| epithelial membrane protein 3                                              |
| epithelial membrane protein 3                                              |
| tripeptidyl peptidase I                                                    |
| ATP synthase, H+ transporting, mitochondrial F1 complex, epsilon subunit   |
| sorting nexin 5                                                            |
| sorting nexin 5                                                            |
| RIKEN cDNA 2500003M10 gene                                                 |
| leptin receptor overlapping transcript                                     |
| kelch-like ECH-associated protein 1                                        |
| ribosomal protein S6 kinase, polypeptide 4                                 |
| mitochondrial ribosomal protein L40                                        |
| immunoglobulin superfamily, member 4A                                      |
| immunoglobulin superfamily, member 4A                                      |
| immunoglobulin superfamily, member 4A                                      |
| Epstein-Barr virus induced gene 3                                          |
| spastic paraplegia 20, spartin (Troyer syndrome) homolog (human)           |
| T-box 6                                                                    |
| matrix metallopeptidase 15                                                 |
| MAD homolog 3 (Drosophila)                                                 |
| Ras-related GTP binding D                                                  |
| pre B-cell leukemia transcription factor 3                                 |
| pre B-cell leukemia transcription factor 3                                 |
| chemokine (C-C motif) receptor-like 2                                      |
| spectrin beta 3                                                            |
| period homolog 1 (Drosophila)                                              |
| RNA polymerase 1-4                                                         |
| TGFB-induced factor 2                                                      |
| mast cell protease 6                                                       |
| dystrophin, muscular dystrophy                                             |
| solute carrier family 10 (sodium/bile acid cotransporter family), member 6 |
| alanine-glyoxylate aminotransferase                                        |
| ATP-binding cassette, sub-family G (WHITE), member 2                       |
| ankyrin repeat domain 28                                                   |
| prolactin-like protein B                                                   |
| folate hydrolase                                                           |
| CUG triplet repeat, RNA binding protein 1                                  |
| rho/rac guanine nucleotide exchange factor (GEF) 2                         |
| rho/rac guanine nucleotide exchange factor (GEF) 2                         |
| secretion regulating guanine nucleotide exchange factor                    |
| F-box and WD-40 domain protein 11                                          |
| kinesin family member 3C                                                   |
| rotatin                                                                    |
| CD5 antigen                                                                |
| immunoglobulin lambda chain, variable 1                                    |
| immunoglobulin lambda chain, variable 1                                    |

|                                                                                   |
|-----------------------------------------------------------------------------------|
| testis expressed gene 21                                                          |
| growth differentiation factor 1 /// longevity assurance homolog 1 (S. cerevisiae) |
| LIM homeobox protein 9                                                            |
| LIM homeobox protein 9                                                            |
| regulator of G protein signaling 7                                                |
| protein tyrosine kinase 9                                                         |
| Gem-interacting protein                                                           |
| protein kinase C, gamma                                                           |
| proline rich protein MP4                                                          |
| proline rich protein HaeIII subfamily 1                                           |
| proline rich protein HaeIII subfamily 1                                           |
| vesicle-associated membrane protein 1                                             |
| vesicle-associated membrane protein 1                                             |
| fibroblast growth factor 12                                                       |
| upstream transcription factor 1                                                   |
| upstream transcription factor 1                                                   |
| Spi-B transcription factor (Spi-1/PU.1 related)                                   |
| protein tyrosine phosphatase, non-receptor type 20                                |
| calcium/calmodulin-dependent protein kinase II alpha                              |
| calcium/calmodulin-dependent protein kinase II alpha                              |
| zeta-chain (TCR) associated protein kinase                                        |
| zeta-chain (TCR) associated protein kinase                                        |
| zeta-chain (TCR) associated protein kinase                                        |
| ATPase, Na+/K+ transporting, beta 2 polypeptide                                   |
| ---                                                                               |
| LIM domain only 2                                                                 |
| F-box and WD-40 domain protein 7, archipelago homolog (Drosophila)                |
| OG9 homeobox gene                                                                 |
| SRY-box containing gene 11                                                        |
| Ets2 repressor factor                                                             |
| Ets2 repressor factor                                                             |
| eukaryotic translation initiation factor 2-alpha kinase 2                         |
| neurturin                                                                         |
| FYVE, RhoGEF and PH domain containing 1                                           |
| male germ cell-associated kinase                                                  |
| RAD51 associated protein 1                                                        |
| killer cell lectin-like receptor, subfamily D, member 1                           |
| killer cell lectin-like receptor subfamily K, member 1                            |
| killer cell lectin-like receptor subfamily K, member 1                            |
| serine/threonine kinase 10                                                        |
| frizzled homolog 2 (Drosophila)                                                   |
| LIM domain binding 2                                                              |
| recombination activating gene 1                                                   |
| RIKEN cDNA 1810013L24 gene                                                        |
| citron                                                                            |
| citron                                                                            |
| cytidine monophospho-N-acetylneuraminic acid hydroxylase                          |
| EMI domain containing 1                                                           |
| growth factor receptor bound protein 10                                           |
| growth factor receptor bound protein 10                                           |
| ameloblastin                                                                      |
| homeobox containing 1                                                             |
| period homolog 2 (Drosophila)                                                     |

|                                                                                                                                                                                                                                                                              |
|------------------------------------------------------------------------------------------------------------------------------------------------------------------------------------------------------------------------------------------------------------------------------|
| alcohol dehydrogenase 7 (class IV), mu or sigma polypeptide                                                                                                                                                                                                                  |
| nuclear receptor subfamily 1, group I, member 2                                                                                                                                                                                                                              |
| chromobox homolog 4 (Drosophila Pc class)                                                                                                                                                                                                                                    |
| SRY-box containing gene 13                                                                                                                                                                                                                                                   |
| polymerase (DNA directed), gamma 2, accessory subunit                                                                                                                                                                                                                        |
| ADP-ribosylation factor 3                                                                                                                                                                                                                                                    |
| SWI/SNF related, matrix associated, actin dependent regulator of chromatin, subfamily a, member 5 /// RIKEN cDNA 9230115A19 gene /// similar to SWI/SNF related, matrix associated, actin dependent regulator of chromatin, subfamily a, member 5                            |
| protein tyrosine phosphatase, non-receptor type 23                                                                                                                                                                                                                           |
| claudin 6                                                                                                                                                                                                                                                                    |
| forkhead box F1a                                                                                                                                                                                                                                                             |
| cholinergic receptor, nicotinic, beta polypeptide 1 (muscle)                                                                                                                                                                                                                 |
| inhibitor of kappaB kinase beta                                                                                                                                                                                                                                              |
| RIKEN cDNA G630024C07 gene                                                                                                                                                                                                                                                   |
| protein inhibitor of activated STAT 3                                                                                                                                                                                                                                        |
| transmembrane protease, serine 8 (intestinal)                                                                                                                                                                                                                                |
| keratin associated protein 5-1                                                                                                                                                                                                                                               |
| SEC23A (S. cerevisiae)                                                                                                                                                                                                                                                       |
| cyclin T1                                                                                                                                                                                                                                                                    |
| src homology 2 domain-containing transforming protein C1                                                                                                                                                                                                                     |
| similar to H-2 class I histocompatibility antigen, D-K alpha chain precursor (H-2D(K)) /// similar to H-2 class I histocompatibility antigen, D-K alpha chain precursor (H-2D(K)) /// similar to H-2 class I histocompatibility antigen, D-B alpha chain precursor (H-2D(B)) |
| myelin protein zero                                                                                                                                                                                                                                                          |
| tripartite motif protein 46                                                                                                                                                                                                                                                  |
| chemokine (C-C motif) ligand 12                                                                                                                                                                                                                                              |
| RAB23, member RAS oncogene family                                                                                                                                                                                                                                            |
| chemokine (C-C motif) receptor-like 1                                                                                                                                                                                                                                        |
| 1-acylglycerol-3-phosphate O-acyltransferase 1 (lysophosphatidic acid acyltransferase, alpha)                                                                                                                                                                                |
| CAP, adenylate cyclase-associated protein 1 (yeast)                                                                                                                                                                                                                          |
| endosulfine alpha                                                                                                                                                                                                                                                            |
| receptor tyrosine kinase-like orphan receptor 2                                                                                                                                                                                                                              |
| receptor tyrosine kinase-like orphan receptor 2                                                                                                                                                                                                                              |
| coxsackievirus and adenovirus receptor                                                                                                                                                                                                                                       |
| G1 to S phase transition 1                                                                                                                                                                                                                                                   |
| TSC22 domain family, member 1                                                                                                                                                                                                                                                |
| ---                                                                                                                                                                                                                                                                          |
| ribosomal protein S15a                                                                                                                                                                                                                                                       |
| FK506 binding protein 9                                                                                                                                                                                                                                                      |
| GIPC PDZ domain containing family, member 1                                                                                                                                                                                                                                  |
| GIPC PDZ domain containing family, member 1                                                                                                                                                                                                                                  |
| proteasome (prosome, macropain) 26S subunit, ATPase 3                                                                                                                                                                                                                        |
| proteasome (prosome, macropain) 26S subunit, ATPase 3                                                                                                                                                                                                                        |
| transcobalamin 2                                                                                                                                                                                                                                                             |
| eukaryotic translation initiation factor 2 alpha kinase 1                                                                                                                                                                                                                    |
| solute carrier family 2 (facilitated glucose transporter), member 1                                                                                                                                                                                                          |
| Y box protein 1                                                                                                                                                                                                                                                              |
| NMD3 homolog (S. cerevisiae)                                                                                                                                                                                                                                                 |
| RIKEN cDNA 5730449L18 gene                                                                                                                                                                                                                                                   |
| heat shock factor binding protein 1                                                                                                                                                                                                                                          |
| calmodulin 4                                                                                                                                                                                                                                                                 |
| protein tyrosine phosphatase-like A domain containing 1                                                                                                                                                                                                                      |
| glutamate receptor, ionotropic, N-methyl D-aspartate-like 1A                                                                                                                                                                                                                 |
| monoamine oxidase A                                                                                                                                                                                                                                                          |
| gelsolin                                                                                                                                                                                                                                                                     |

|                                                                                                                                        |
|----------------------------------------------------------------------------------------------------------------------------------------|
| ubiquitin specific peptidase 19                                                                                                        |
| isoleucine-tRNA synthetase                                                                                                             |
| LPS-induced TN factor                                                                                                                  |
| enoyl coenzyme A hydratase 1, peroxisomal                                                                                              |
| resistin like beta                                                                                                                     |
| signal recognition particle receptor ('docking protein')                                                                               |
| inner centromere protein                                                                                                               |
| RIKEN cDNA 1200020A08 gene                                                                                                             |
| heterogeneous nuclear ribonucleoprotein U                                                                                              |
| protein phosphatase 2A, regulatory subunit B (PR 53)                                                                                   |
| NADH dehydrogenase (ubiquinone) 1 alpha subcomplex, 13                                                                                 |
| demilune cell and parotid protein                                                                                                      |
| regucalcin                                                                                                                             |
| RIKEN cDNA 2700059D21 gene                                                                                                             |
| RIKEN cDNA 2700059D21 gene                                                                                                             |
| NECAP endocytosis associated 2                                                                                                         |
| cytochrome P450, family 3, subfamily a, polypeptide 11                                                                                 |
| gap junction membrane channel protein beta 1                                                                                           |
| zinc finger protein 265                                                                                                                |
| zinc finger protein 265                                                                                                                |
| RIKEN cDNA 2610524G07 gene                                                                                                             |
| DNA segment, Chr 12, ERATO Doi 647, expressed                                                                                          |
| RIKEN cDNA 1500001L15 gene                                                                                                             |
| golgi phosphoprotein 3-like                                                                                                            |
| component of Sp100-rs                                                                                                                  |
| RIKEN cNDA C130026I21 gene /// similar to SP140 nuclear body protein (predicted) /// similar to SP140 nuclear body protein (predicted) |
| thioesterase superfamily member 2                                                                                                      |
| myo-inositol oxygenase                                                                                                                 |
| ring finger protein 4                                                                                                                  |
| elastase 1, pancreatic                                                                                                                 |
| craniofacial development protein 1                                                                                                     |
| folate receptor 1 (adult)                                                                                                              |
| mitochondrial ribosomal protein L18 /// similar to mitochondrial ribosomal protein L18                                                 |
| mitochondrial ribosomal protein L18                                                                                                    |
| cytochrome c oxidase subunit IV isoform 1                                                                                              |
| transcriptional regulator, SIN3B (yeast)                                                                                               |
| transcriptional regulator, SIN3B (yeast)                                                                                               |
| LIM and SH3 protein 1                                                                                                                  |
| amyloid beta precursor protein binding protein 1                                                                                       |
| inosine triphosphatase (nucleoside triphosphate pyrophosphatase)                                                                       |
| ATPase, Na+/K+ transporting, alpha 1 polypeptide                                                                                       |
| ATPase, Na+/K+ transporting, alpha 1 polypeptide                                                                                       |
| ATPase, Na+/K+ transporting, alpha 1 polypeptide                                                                                       |
| expressed sequence AI316787                                                                                                            |
| keratin complex-1, acidic, gene C29                                                                                                    |
| RIKEN cDNA 4631426H08 gene                                                                                                             |
| Metadherin                                                                                                                             |
| proteaseome (prosome, macropain) 28 subunit, 3                                                                                         |
| solute carrier family 2 (facilitated glucose transporter), member 3                                                                    |
| Sjogren's syndrome nuclear autoantigen 1                                                                                               |
| SH3-binding domain glutamic acid-rich protein like                                                                                     |
| RIKEN cDNA 2310016E02 gene                                                                                                             |
| carbonyl reductase 2                                                                                                                   |

[illegible]

|                                                                                                                                                                                                                                                                                                                                                                                                                                                                                                                                                                                                                                                           |
|-----------------------------------------------------------------------------------------------------------------------------------------------------------------------------------------------------------------------------------------------------------------------------------------------------------------------------------------------------------------------------------------------------------------------------------------------------------------------------------------------------------------------------------------------------------------------------------------------------------------------------------------------------------|
| enabled homolog (Drosophila)                                                                                                                                                                                                                                                                                                                                                                                                                                                                                                                                                                                                                              |
| histocompatibility 2, T region locus 10 /// histocompatibility 2, T region locus 22 /// histocompatibility 2, T region locus 9                                                                                                                                                                                                                                                                                                                                                                                                                                                                                                                            |
| matrix Gla protein                                                                                                                                                                                                                                                                                                                                                                                                                                                                                                                                                                                                                                        |
| ATP-binding cassette, sub-family D (ALD), member 4                                                                                                                                                                                                                                                                                                                                                                                                                                                                                                                                                                                                        |
| NAD(P) dependent steroid dehydrogenase-like                                                                                                                                                                                                                                                                                                                                                                                                                                                                                                                                                                                                               |
| B-cell leukemia/lymphoma 2 related protein A1a /// B-cell leukemia/lymphoma 2 related protein A1c /// B-cell leukemia/lymphoma 2 related protein A1d                                                                                                                                                                                                                                                                                                                                                                                                                                                                                                      |
| Braf transforming gene                                                                                                                                                                                                                                                                                                                                                                                                                                                                                                                                                                                                                                    |
| interleukin 1 receptor antagonist                                                                                                                                                                                                                                                                                                                                                                                                                                                                                                                                                                                                                         |
| glial cell line derived neurotrophic factor family receptor alpha 1                                                                                                                                                                                                                                                                                                                                                                                                                                                                                                                                                                                       |
| homeo box A11, opposite strand transcript                                                                                                                                                                                                                                                                                                                                                                                                                                                                                                                                                                                                                 |
| interleukin 11 receptor, alpha chain 1 /// interleukin 11 receptor, alpha chain 2 /// similar to interleukin 11 receptor, alpha chain 2                                                                                                                                                                                                                                                                                                                                                                                                                                                                                                                   |
| heat shock protein 1A                                                                                                                                                                                                                                                                                                                                                                                                                                                                                                                                                                                                                                     |
| RIKEN cDNA 2210419D22 gene                                                                                                                                                                                                                                                                                                                                                                                                                                                                                                                                                                                                                                |
| myeloid/lymphoid or mixed lineage-leukemia translocation to 10 homolog (Drosophila)                                                                                                                                                                                                                                                                                                                                                                                                                                                                                                                                                                       |
| defensin related cryptdin 17                                                                                                                                                                                                                                                                                                                                                                                                                                                                                                                                                                                                                              |
| eomesodermin homolog (Xenopus laevis)                                                                                                                                                                                                                                                                                                                                                                                                                                                                                                                                                                                                                     |
| trans-golgi network protein /// trans-golgi network protein 2                                                                                                                                                                                                                                                                                                                                                                                                                                                                                                                                                                                             |
| trans-golgi network protein /// trans-golgi network protein 2                                                                                                                                                                                                                                                                                                                                                                                                                                                                                                                                                                                             |
| proliferin /// proliferin 2 /// mitogen regulated protein, proliferin 3 /// mitogen regulated protein, proliferin 4 /// similar to Proliferin 3 precursor (Mitogen-regulated protein 3) /// similar to mitogen regulated protein, proliferin 4 /// similar to mitogen regulated protein, proliferin 4 /// similar to mitogen regulated protein, proliferin 4                                                                                                                                                                                                                                                                                              |
| endomucin                                                                                                                                                                                                                                                                                                                                                                                                                                                                                                                                                                                                                                                 |
| endomucin                                                                                                                                                                                                                                                                                                                                                                                                                                                                                                                                                                                                                                                 |
| toll interacting protein                                                                                                                                                                                                                                                                                                                                                                                                                                                                                                                                                                                                                                  |
| multiple PDZ domain protein                                                                                                                                                                                                                                                                                                                                                                                                                                                                                                                                                                                                                               |
| homeo box B1                                                                                                                                                                                                                                                                                                                                                                                                                                                                                                                                                                                                                                              |
| histone 1, H2ba                                                                                                                                                                                                                                                                                                                                                                                                                                                                                                                                                                                                                                           |
| kinesin family member C2                                                                                                                                                                                                                                                                                                                                                                                                                                                                                                                                                                                                                                  |
| kinesin family member C2                                                                                                                                                                                                                                                                                                                                                                                                                                                                                                                                                                                                                                  |
| CUG triplet repeat, RNA binding protein 2                                                                                                                                                                                                                                                                                                                                                                                                                                                                                                                                                                                                                 |
| killer cell lectin-like receptor, subfamily A, member 3                                                                                                                                                                                                                                                                                                                                                                                                                                                                                                                                                                                                   |
| killer cell lectin-like receptor, subfamily A, member 3                                                                                                                                                                                                                                                                                                                                                                                                                                                                                                                                                                                                   |
| inositol 1,4,5-triphosphate receptor 1                                                                                                                                                                                                                                                                                                                                                                                                                                                                                                                                                                                                                    |
| protein tyrosine phosphatase, receptor type, D                                                                                                                                                                                                                                                                                                                                                                                                                                                                                                                                                                                                            |
| testicular haploid expressed gene                                                                                                                                                                                                                                                                                                                                                                                                                                                                                                                                                                                                                         |
| sarcoglycan, beta (dystrophin-associated glycoprotein)                                                                                                                                                                                                                                                                                                                                                                                                                                                                                                                                                                                                    |
| ribosomal protein S6 kinase, polypeptide 1                                                                                                                                                                                                                                                                                                                                                                                                                                                                                                                                                                                                                |
| HLA-B associated transcript 2                                                                                                                                                                                                                                                                                                                                                                                                                                                                                                                                                                                                                             |
| Hermansky-Pudlak syndrome 1 homolog (human)                                                                                                                                                                                                                                                                                                                                                                                                                                                                                                                                                                                                               |
| growth factor receptor bound protein 2-associated protein 1                                                                                                                                                                                                                                                                                                                                                                                                                                                                                                                                                                                               |
| activin receptor IIB                                                                                                                                                                                                                                                                                                                                                                                                                                                                                                                                                                                                                                      |
| immunoglobulin heavy chain (V3609N non-productive) /// immunoglobulin kappa chain variable 1 (V1) /// similar to Ig H-chain (VDJ-region) precursor /// similar to Ig heavy chain V region 102 precursor /// similar to Ig heavy chain V region B1-8/186-2 precursor /// similar to Ig heavy chain V region 102 precursor /// similar to Ig heavy chain V region 186-1 precursor /// similar to Ig heavy chain V region MOPC 47A /// similar to Ig heavy chain V region 186-1 precursor /// similar to Ig heavy chain V region 186-1 precursor /// similar to Ig heavy chain V region 102 precursor /// similar to Ig heavy chain V region 186-1 precursor |
| CD80 antigen                                                                                                                                                                                                                                                                                                                                                                                                                                                                                                                                                                                                                                              |
| CD80 antigen                                                                                                                                                                                                                                                                                                                                                                                                                                                                                                                                                                                                                                              |
| CCR4 carbon catabolite repression 4-like (S. cerevisiae) /// SH3-domain GRB2-like (endophilin) interacting protein 1 /// pol polypeptide /// Gag /// gag protein                                                                                                                                                                                                                                                                                                                                                                                                                                                                                          |
| CCR4 carbon catabolite repression 4-like (S. cerevisiae) /// SH3-domain GRB2-like (endophilin) interacting protein 1 /// pol polypeptide /// Gag /// gag protein                                                                                                                                                                                                                                                                                                                                                                                                                                                                                          |
| CCR4 carbon catabolite repression 4-like (S. cerevisiae) /// SH3-domain GRB2-like (endophilin) interacting protein 1 /// pol polypeptide /// gag protein                                                                                                                                                                                                                                                                                                                                                                                                                                                                                                  |
| pregnancy upregulated non-ubiquitously expressed CaM kinase                                                                                                                                                                                                                                                                                                                                                                                                                                                                                                                                                                                               |
| nuclear receptor coactivator 6 interacting protein                                                                                                                                                                                                                                                                                                                                                                                                                                                                                                                                                                                                        |
| HLA-B-associated transcript 3                                                                                                                                                                                                                                                                                                                                                                                                                                                                                                                                                                                                                             |
| early B-cell factor 3                                                                                                                                                                                                                                                                                                                                                                                                                                                                                                                                                                                                                                     |
| interleukin 1 receptor, type I                                                                                                                                                                                                                                                                                                                                                                                                                                                                                                                                                                                                                            |
| POU domain, class 2, associating factor 1                                                                                                                                                                                                                                                                                                                                                                                                                                                                                                                                                                                                                 |

|                                                                                                                                                                                                                                                                                                                                                                                                                                                                                                                                                                                                                                                                                                                                                                                  |
|----------------------------------------------------------------------------------------------------------------------------------------------------------------------------------------------------------------------------------------------------------------------------------------------------------------------------------------------------------------------------------------------------------------------------------------------------------------------------------------------------------------------------------------------------------------------------------------------------------------------------------------------------------------------------------------------------------------------------------------------------------------------------------|
| SET and MYND domain containing 5                                                                                                                                                                                                                                                                                                                                                                                                                                                                                                                                                                                                                                                                                                                                                 |
| tumor necrosis factor (ligand) superfamily, member 12                                                                                                                                                                                                                                                                                                                                                                                                                                                                                                                                                                                                                                                                                                                            |
| TAF9 RNA polymerase II, TATA box binding protein (TBP)-associated factor                                                                                                                                                                                                                                                                                                                                                                                                                                                                                                                                                                                                                                                                                                         |
| Nik related kinase                                                                                                                                                                                                                                                                                                                                                                                                                                                                                                                                                                                                                                                                                                                                                               |
| ---                                                                                                                                                                                                                                                                                                                                                                                                                                                                                                                                                                                                                                                                                                                                                                              |
| HLA-B-associated transcript 3                                                                                                                                                                                                                                                                                                                                                                                                                                                                                                                                                                                                                                                                                                                                                    |
| HLA-B-associated transcript 3                                                                                                                                                                                                                                                                                                                                                                                                                                                                                                                                                                                                                                                                                                                                                    |
| ataxin 7-like 3                                                                                                                                                                                                                                                                                                                                                                                                                                                                                                                                                                                                                                                                                                                                                                  |
| tubulin, alpha 7                                                                                                                                                                                                                                                                                                                                                                                                                                                                                                                                                                                                                                                                                                                                                                 |
| GATA binding protein 6                                                                                                                                                                                                                                                                                                                                                                                                                                                                                                                                                                                                                                                                                                                                                           |
| prolactin receptor                                                                                                                                                                                                                                                                                                                                                                                                                                                                                                                                                                                                                                                                                                                                                               |
| immunoglobulin heavy chain complex /// immunoglobulin heavy chain 1a (serum IgG2a) /// expressed sequence AI324046 /// similar to immunoglobulin mu-chain /// similar to Ig heavy chain V-I region V35 precursor /// similar to Ig heavy chain V-I region V35 precursor /// similar to Ig heavy chain V region AC38 205.12 /// similar to Ig heavy chain V-I region HG3 precursor /// similar to Ig heavy chain V region 108A precursor /// similar to Ig heavy chain V-I region V35 precursor /// similar to Ig heavy chain V-I region V35 precursor /// similar to Ig heavy chain V-I region V35 precursor /// similar to Ig heavy chain V-I region V35 precursor /// similar to Ig heavy chain V-I region V35 precursor /// similar to Ig heavy chain V region 108A precursor |
| hypothetical protein LOC625794                                                                                                                                                                                                                                                                                                                                                                                                                                                                                                                                                                                                                                                                                                                                                   |
| proliferin /// proliferin 2 /// mitogen regulated protein, proliferin 3 /// mitogen regulated protein, proliferin 4                                                                                                                                                                                                                                                                                                                                                                                                                                                                                                                                                                                                                                                              |
| LIM and SH3 protein 1                                                                                                                                                                                                                                                                                                                                                                                                                                                                                                                                                                                                                                                                                                                                                            |
| perforin 1 (pore forming protein)                                                                                                                                                                                                                                                                                                                                                                                                                                                                                                                                                                                                                                                                                                                                                |
| ---                                                                                                                                                                                                                                                                                                                                                                                                                                                                                                                                                                                                                                                                                                                                                                              |
| protein phosphatase 1, regulatory (inhibitor) subunit 3C                                                                                                                                                                                                                                                                                                                                                                                                                                                                                                                                                                                                                                                                                                                         |
| claudin 2                                                                                                                                                                                                                                                                                                                                                                                                                                                                                                                                                                                                                                                                                                                                                                        |
| nemo like kinase                                                                                                                                                                                                                                                                                                                                                                                                                                                                                                                                                                                                                                                                                                                                                                 |
| protein tyrosine phosphatase, receptor type, G /// similar to protein tyrosine phosphatase, receptor type, G                                                                                                                                                                                                                                                                                                                                                                                                                                                                                                                                                                                                                                                                     |
| growth arrest specific 8                                                                                                                                                                                                                                                                                                                                                                                                                                                                                                                                                                                                                                                                                                                                                         |
| solute carrier family 30 (zinc transporter), member 1                                                                                                                                                                                                                                                                                                                                                                                                                                                                                                                                                                                                                                                                                                                            |
| linker of T-cell receptor pathways                                                                                                                                                                                                                                                                                                                                                                                                                                                                                                                                                                                                                                                                                                                                               |
| paraoxonase 3                                                                                                                                                                                                                                                                                                                                                                                                                                                                                                                                                                                                                                                                                                                                                                    |
| brachyury                                                                                                                                                                                                                                                                                                                                                                                                                                                                                                                                                                                                                                                                                                                                                                        |
| inositol polyphosphate-1-phosphatase                                                                                                                                                                                                                                                                                                                                                                                                                                                                                                                                                                                                                                                                                                                                             |
| zinc finger protein 36, C3H type-like 2                                                                                                                                                                                                                                                                                                                                                                                                                                                                                                                                                                                                                                                                                                                                          |
| zinc finger protein 36, C3H type-like 2                                                                                                                                                                                                                                                                                                                                                                                                                                                                                                                                                                                                                                                                                                                                          |
| estrogen receptor 1 (alpha)                                                                                                                                                                                                                                                                                                                                                                                                                                                                                                                                                                                                                                                                                                                                                      |
| estrogen receptor 1 (alpha)                                                                                                                                                                                                                                                                                                                                                                                                                                                                                                                                                                                                                                                                                                                                                      |
| estrogen receptor 1 (alpha)                                                                                                                                                                                                                                                                                                                                                                                                                                                                                                                                                                                                                                                                                                                                                      |
| non-catalytic region of tyrosine kinase adaptor protein 2                                                                                                                                                                                                                                                                                                                                                                                                                                                                                                                                                                                                                                                                                                                        |
| guanine nucleotide binding protein, beta 4                                                                                                                                                                                                                                                                                                                                                                                                                                                                                                                                                                                                                                                                                                                                       |
| forkhead box A2                                                                                                                                                                                                                                                                                                                                                                                                                                                                                                                                                                                                                                                                                                                                                                  |
| golgi autoantigen, golgin subfamily a, 3                                                                                                                                                                                                                                                                                                                                                                                                                                                                                                                                                                                                                                                                                                                                         |
| RIKEN cDNA 2810417H13 gene                                                                                                                                                                                                                                                                                                                                                                                                                                                                                                                                                                                                                                                                                                                                                       |
| protease, serine, 12 neurotrypsin (motopsin)                                                                                                                                                                                                                                                                                                                                                                                                                                                                                                                                                                                                                                                                                                                                     |
| guanylate cyclase 1, soluble, beta 3                                                                                                                                                                                                                                                                                                                                                                                                                                                                                                                                                                                                                                                                                                                                             |
| zona pellucida binding protein                                                                                                                                                                                                                                                                                                                                                                                                                                                                                                                                                                                                                                                                                                                                                   |
| interferon-induced protein with tetratricopeptide repeats 3                                                                                                                                                                                                                                                                                                                                                                                                                                                                                                                                                                                                                                                                                                                      |
| pre-B lymphocyte gene 3                                                                                                                                                                                                                                                                                                                                                                                                                                                                                                                                                                                                                                                                                                                                                          |
| ring finger protein 14                                                                                                                                                                                                                                                                                                                                                                                                                                                                                                                                                                                                                                                                                                                                                           |
| RIKEN cDNA 2010107H07 gene                                                                                                                                                                                                                                                                                                                                                                                                                                                                                                                                                                                                                                                                                                                                                       |
| integrin, alpha E, epithelial-associated                                                                                                                                                                                                                                                                                                                                                                                                                                                                                                                                                                                                                                                                                                                                         |
| ---                                                                                                                                                                                                                                                                                                                                                                                                                                                                                                                                                                                                                                                                                                                                                                              |
| transmembrane protein 71                                                                                                                                                                                                                                                                                                                                                                                                                                                                                                                                                                                                                                                                                                                                                         |
| DEAD (Asp-Glu-Ala-Asp) box polypeptide 6                                                                                                                                                                                                                                                                                                                                                                                                                                                                                                                                                                                                                                                                                                                                         |
| DEAD (Asp-Glu-Ala-Asp) box polypeptide 6                                                                                                                                                                                                                                                                                                                                                                                                                                                                                                                                                                                                                                                                                                                                         |
| ubiquitination factor E4B, UFD2 homolog (S. cerevisiae)                                                                                                                                                                                                                                                                                                                                                                                                                                                                                                                                                                                                                                                                                                                          |
| anaphase promoting complex subunit 11 homolog (yeast)                                                                                                                                                                                                                                                                                                                                                                                                                                                                                                                                                                                                                                                                                                                            |

|                                                                                                                                                                                                                                                                                            |
|--------------------------------------------------------------------------------------------------------------------------------------------------------------------------------------------------------------------------------------------------------------------------------------------|
| programmed cell death 5                                                                                                                                                                                                                                                                    |
| RIKEN cDNA 3930401K13 gene                                                                                                                                                                                                                                                                 |
| importin 7                                                                                                                                                                                                                                                                                 |
| proteasome (prosome, macropain) 26S subunit, non-ATPase, 12                                                                                                                                                                                                                                |
| NADH dehydrogenase (ubiquinone) Fe-S protein 2                                                                                                                                                                                                                                             |
| eukaryotic translation initiation factor 3, subunit 9 (eta)                                                                                                                                                                                                                                |
| ERBB receptor feedback inhibitor 1                                                                                                                                                                                                                                                         |
| ERBB receptor feedback inhibitor 1                                                                                                                                                                                                                                                         |
| calcium binding protein 39                                                                                                                                                                                                                                                                 |
| UDP-GalNAc:betaGlcNAc beta 1,3-galactosaminyltransferase, polypeptide 2                                                                                                                                                                                                                    |
| RNA binding motif protein 13                                                                                                                                                                                                                                                               |
| plasminogen activator, tissue                                                                                                                                                                                                                                                              |
| Der1-like domain family, member 1                                                                                                                                                                                                                                                          |
| Der1-like domain family, member 1                                                                                                                                                                                                                                                          |
| ATPase inhibitory factor 1                                                                                                                                                                                                                                                                 |
| TCDD-inducible poly(ADP-ribose) polymerase                                                                                                                                                                                                                                                 |
| RIKEN cDNA 2410003A14 gene                                                                                                                                                                                                                                                                 |
| ribosomal protein L22 like 1                                                                                                                                                                                                                                                               |
| proteasome (prosome, macropain) subunit, alpha type 7                                                                                                                                                                                                                                      |
| heterogeneous nuclear ribonucleoprotein H1                                                                                                                                                                                                                                                 |
| malate dehydrogenase 2, NAD (mitochondrial)                                                                                                                                                                                                                                                |
| RIKEN cDNA 5430437P03 gene                                                                                                                                                                                                                                                                 |
| lectin, mannose-binding 2                                                                                                                                                                                                                                                                  |
| choline phosphotransferase 1                                                                                                                                                                                                                                                               |
| cytochrome P450, family 2, subfamily e, polypeptide 1                                                                                                                                                                                                                                      |
| interferon alpha responsive gene                                                                                                                                                                                                                                                           |
| small nuclear ribonucleoprotein polypeptide G /// similar to small nuclear ribonucleoprotein polypeptide G /// similar to small nuclear ribonucleoprotein polypeptide G                                                                                                                    |
| CD8 antigen, beta chain 1                                                                                                                                                                                                                                                                  |
| ELAV (embryonic lethal, abnormal vision, Drosophila)-like 1 (Hu antigen R)                                                                                                                                                                                                                 |
| cullin 1                                                                                                                                                                                                                                                                                   |
| WNK lysine deficient protein kinase 1                                                                                                                                                                                                                                                      |
| calponin 2                                                                                                                                                                                                                                                                                 |
| peptidase (mitochondrial processing) beta                                                                                                                                                                                                                                                  |
| 5-azacytidine induced gene 2                                                                                                                                                                                                                                                               |
| mortality factor 4 like 1 /// similar to mortality factor 4 like 1 isoform b /// RIKEN cDNA A730098P11 gene /// similar to mortality factor 4 like 1 /// similar to mortality factor 4 like 1 (predicted)                                                                                  |
| transcription elongation factor B (SIII), polypeptide 1                                                                                                                                                                                                                                    |
| transcription elongation factor B (SIII), polypeptide 1                                                                                                                                                                                                                                    |
| transcription elongation factor B (SIII), polypeptide 1                                                                                                                                                                                                                                    |
| RIKEN cDNA 3100004P22 gene                                                                                                                                                                                                                                                                 |
| translocase of inner mitochondrial membrane 10 homolog (yeast)                                                                                                                                                                                                                             |
| RIKEN cDNA 2510048O06 gene                                                                                                                                                                                                                                                                 |
| TH1-like homolog (Drosophila)                                                                                                                                                                                                                                                              |
| tubulin, beta 2c                                                                                                                                                                                                                                                                           |
| splicing factor, arginine/serine-rich 2 (SC-35)                                                                                                                                                                                                                                            |
| ubiquitin-like 3                                                                                                                                                                                                                                                                           |
| ---                                                                                                                                                                                                                                                                                        |
| protein tyrosine kinase 9-like (A6-related protein)                                                                                                                                                                                                                                        |
| tripartite motif protein 11                                                                                                                                                                                                                                                                |
| glioma tumor suppressor candidate region gene 2                                                                                                                                                                                                                                            |
| chromatin licensing and DNA replication factor 1                                                                                                                                                                                                                                           |
| proteasome (prosome, macropain) subunit, beta type 3                                                                                                                                                                                                                                       |
| pro-opiomelanocortin-alpha                                                                                                                                                                                                                                                                 |
| 8 cells embryo 8 cells cDNA, RIKEN full-length enriched library, clone:E860019P17 product:unclassifiable, full insert sequence /// CDNA clone IMAGE:30033444 /// 2 cells egg cDNA, RIKEN full-length enriched library, clone:B020014N01 product:hypothetical protein, full insert sequence |



|                                                                                                                                |
|--------------------------------------------------------------------------------------------------------------------------------|
| 8 cells embryo 8 cells cDNA, RIKEN full-length enriched library, clone:E860019P17 product:unclassifiable, full insert sequence |
| COMM domain containing 2                                                                                                       |
| RAB2, member RAS oncogene family                                                                                               |
| apolipoprotein A-I binding protein                                                                                             |
| REX2, RNA exonuclease 2 homolog (S. cerevisiae)                                                                                |
| ---                                                                                                                            |
| CDC42 effector protein (Rho GTPase binding) 4                                                                                  |
| elastase 2A                                                                                                                    |
| RIKEN cDNA 2700060E02 gene                                                                                                     |
| Transcribed locus                                                                                                              |
| enhancer of rudimentary homolog (Drosophila)                                                                                   |
| heterogeneous nuclear ribonucleoprotein K                                                                                      |
| guanine nucleotide binding protein (G protein), gamma 5 subunit                                                                |
| ATPase, H+ transporting, lysosomal accessory protein 1                                                                         |
| suppressor of zeste 12 homolog (Drosophila)                                                                                    |
| alpha 1 microglobulin/bikunin                                                                                                  |
| c-src tyrosine kinase                                                                                                          |
| RIKEN cDNA 0610031J06 gene                                                                                                     |
| cell division cycle 34 homolog (S. cerevisiae)                                                                                 |
| betaine-homocysteine methyltransferase                                                                                         |
| EGF-like repeats and discoidin I-like domains 3                                                                                |
| dolichol-phosphate (beta-D) mannosyltransferase 2                                                                              |
| cleavage and polyadenylation specific factor 3-like                                                                            |
| cortactin                                                                                                                      |
| cortactin                                                                                                                      |
| stearoyl-Coenzyme A desaturase 1                                                                                               |
| stearoyl-Coenzyme A desaturase 1                                                                                               |
| stearoyl-Coenzyme A desaturase 1                                                                                               |
| nuclear receptor binding protein                                                                                               |
| potassium channel tetramerisation domain containing 10                                                                         |
| cysteine-rich protein 1 (intestinal)                                                                                           |
| NADH dehydrogenase (ubiquinone) flavoprotein 2                                                                                 |
| sema domain, immunoglobulin domain (Ig), transmembrane domain (TM) and short cytoplasmic domain, (semaphorin) 4A               |
| zinc finger protein 91                                                                                                         |
| v-crk sarcoma virus CT10 oncogene homolog (avian)                                                                              |
| ring finger protein 14                                                                                                         |
| decapping enzyme, scavenger                                                                                                    |
| ribosomal protein S19                                                                                                          |
| RIKEN cDNA 2610204L23 gene /// hypothetical protein LOC666452 /// hypothetical protein LOC677557                               |
| golgi SNAP receptor complex member 2                                                                                           |
| golgi SNAP receptor complex member 2                                                                                           |
| golgi SNAP receptor complex member 2                                                                                           |
| polymerase (RNA) II (DNA directed) polypeptide G                                                                               |
| Fc receptor, IgG, low affinity III                                                                                             |
| fatty acid binding protein 1, liver                                                                                            |
| ribophorin II                                                                                                                  |
| ribophorin II                                                                                                                  |
| RIKEN cDNA 1110020P15 gene                                                                                                     |
| septin 4                                                                                                                       |
| succinate dehydrogenase complex, subunit A, flavoprotein (Fp)                                                                  |
| RNA binding motif protein 17                                                                                                   |
| cell division cycle 26                                                                                                         |
| proteoglycan 1, secretory granule                                                                                              |

|                                                                        |
|------------------------------------------------------------------------|
| interleukin 3                                                          |
| protein kinase C, mu                                                   |
| polypyrimidine tract binding protein 2                                 |
| Polycystic kidney disease 1 like 3                                     |
| T lymphoma oncogene                                                    |
| ---                                                                    |
| GLI-Kruppel family member GLI1                                         |
| hypocretin                                                             |
| neuronal pentraxin 2                                                   |
| transient receptor potential cation channel, subfamily C, member 4     |
| zinc finger protein 98                                                 |
| H6 homeo box 1                                                         |
| testis specific protein-Y encoded, pseudogene                          |
| telomerase reverse transcriptase                                       |
| cell division cycle 42 homolog (S. cerevisiae)                         |
| Transcribed locus                                                      |
| deoxyribonuclease 1-like 3                                             |
| phosphatidylinositol 3-kinase, C2 domain containing, gamma polypeptide |
| zinc finger protein 281                                                |
| cDNA sequence D10627                                                   |
| cDNA sequence D10627                                                   |
| tumor necrosis factor (ligand) superfamily, member 10                  |
| RIKEN cDNA 4933415E08 gene                                             |
| histone 1, H1a                                                         |
| neuropeptide Y receptor Y5                                             |
| bombesin-like receptor 3                                               |
| putative neuronal cell adhesion molecule                               |
| putative neuronal cell adhesion molecule                               |
| phosphatidylinositol-4-phosphate 5-kinase, type 1 gamma                |
| small proline-rich protein 2F                                          |
| small proline-rich protein 2H                                          |
| myocilin                                                               |
| neurogenic differentiation 4                                           |
| topoisomerase (DNA) III alpha                                          |
| epithelial V-like antigen 1                                            |
| wingless related MMTV integration site 2b                              |
| diaphanous homolog 2 (Drosophila)                                      |
| BRCA1 associated RING domain 1                                         |
| Transcribed locus                                                      |
| P140 gene                                                              |
| exportin 1, CRM1 homolog (yeast)                                       |
| glutathione peroxidase 1                                               |
| myocyte enhancer factor 2A                                             |
| wingless-related MMTV integration site 1                               |
| transcription factor CP2                                               |
| RIKEN cDNA 5830431A10 gene                                             |
| interleukin 8 receptor, beta                                           |
| fucosyltransferase 7                                                   |
| phosducin                                                              |
| macrophage scavenger receptor 1                                        |
| Fc receptor, IgE, low affinity II, alpha polypeptide                   |
| colony stimulating factor 3 (granulocyte)                              |
| glial fibrillary acidic protein                                        |

|                                                                        |
|------------------------------------------------------------------------|
| glial fibrillary acidic protein                                        |
| interferon beta 1, fibroblast                                          |
| chemokine (C-C motif) ligand 4                                         |
| serine (or cysteine) peptidase inhibitor, clade E, member 1            |
| pancreatic polypeptide                                                 |
| human immunodeficiency virus type I enhancer binding protein 3         |
| retinal S-antigen                                                      |
| prolactin induced protein                                              |
| salivary protein 1                                                     |
| salivary protein 1 /// salivary protein 2                              |
| thyroglobulin                                                          |
| regulator of G-protein signaling 4                                     |
| natriuretic peptide precursor type C                                   |
| platelet-activating factor receptor                                    |
| platelet-activating factor receptor                                    |
| platelet-activating factor receptor                                    |
| ephrin B3                                                              |
| protein kinase C, epsilon                                              |
| DEAD (Asp-Glu-Ala-Asp) box polypeptide 4                               |
| ATPase, H+/K+ exchanging, gastric, alpha polypeptide                   |
| ST8 alpha-N-acetyl-neuraminide alpha-2,8-sialyltransferase 1           |
| ---                                                                    |
| chemokine (C-C motif) ligand 1                                         |
| nitric oxide synthase 3, endothelial cell                              |
| interleukin 13                                                         |
| protocadherin 12                                                       |
| carbohydrate (chondroitin 6/keratan) sulfotransferase 3                |
| integrin beta 2-like                                                   |
| X-ray repair complementing defective repair in Chinese hamster cells 2 |
| chemokine (C-X-C motif) receptor 3                                     |
| catenin (cadherin associated protein), alpha-like 1                    |
| brachyury 2                                                            |
| LIM homeobox protein 6                                                 |
| hydroxysteroid (17-beta) dehydrogenase 7                               |
| CD46 antigen, complement regulatory protein                            |
| dachshund 1 (Drosophila)                                               |
| dachshund 1 (Drosophila)                                               |
| scrapie responsive gene 1                                              |
| calcium channel, voltage-dependent, gamma subunit 2                    |
| keratin associated protein 13                                          |
| G protein-coupled receptor 33                                          |
| potassium channel, subfamily K, member 4                               |
| Tnf receptor-associated factor 1                                       |
| goosecoid                                                              |
| hyperpolarization-activated, cyclic nucleotide-gated K+ 3              |
| B-cell CLL/lymphoma 6, member B                                        |
| tumor necrosis factor receptor superfamily, member 17                  |
| coagulation factor II (thrombin) receptor-like 3                       |
| ganglioside-induced differentiation-associated-protein 10              |
| potassium voltage-gated channel, shaker-related subfamily, member 7    |
| hyperpolarization-activated, cyclic nucleotide-gated K+ 2              |
| hyperpolarization-activated, cyclic nucleotide-gated K+ 2              |
| inhibitor of kappaB kinase gamma                                       |

|                                                                                                                                                                                                                                                                                                                                                                                                                                                                                                                                                                                                                                                                                                                                                                                                        |
|--------------------------------------------------------------------------------------------------------------------------------------------------------------------------------------------------------------------------------------------------------------------------------------------------------------------------------------------------------------------------------------------------------------------------------------------------------------------------------------------------------------------------------------------------------------------------------------------------------------------------------------------------------------------------------------------------------------------------------------------------------------------------------------------------------|
| UDP-glucose ceramide glucosyltransferase                                                                                                                                                                                                                                                                                                                                                                                                                                                                                                                                                                                                                                                                                                                                                               |
| peroxisome proliferator activator receptor delta                                                                                                                                                                                                                                                                                                                                                                                                                                                                                                                                                                                                                                                                                                                                                       |
| kidney androgen regulated protein                                                                                                                                                                                                                                                                                                                                                                                                                                                                                                                                                                                                                                                                                                                                                                      |
| gastrulation brain homeobox 2                                                                                                                                                                                                                                                                                                                                                                                                                                                                                                                                                                                                                                                                                                                                                                          |
| sodium channel, voltage-gated, type I, alpha                                                                                                                                                                                                                                                                                                                                                                                                                                                                                                                                                                                                                                                                                                                                                           |
| T-cell receptor beta, variable 8.2                                                                                                                                                                                                                                                                                                                                                                                                                                                                                                                                                                                                                                                                                                                                                                     |
| RIKEN cDNA A630025C20 gene                                                                                                                                                                                                                                                                                                                                                                                                                                                                                                                                                                                                                                                                                                                                                                             |
| eosinophil peroxidase                                                                                                                                                                                                                                                                                                                                                                                                                                                                                                                                                                                                                                                                                                                                                                                  |
| gene rich cluster, C10 gene                                                                                                                                                                                                                                                                                                                                                                                                                                                                                                                                                                                                                                                                                                                                                                            |
| protein disulfide isomerase associated 6                                                                                                                                                                                                                                                                                                                                                                                                                                                                                                                                                                                                                                                                                                                                                               |
| protein disulfide isomerase associated 6                                                                                                                                                                                                                                                                                                                                                                                                                                                                                                                                                                                                                                                                                                                                                               |
| protein disulfide isomerase associated 6                                                                                                                                                                                                                                                                                                                                                                                                                                                                                                                                                                                                                                                                                                                                                               |
| translocase of inner mitochondrial membrane 13 homolog (yeast)                                                                                                                                                                                                                                                                                                                                                                                                                                                                                                                                                                                                                                                                                                                                         |
| RIKEN cDNA 6720460F02 gene                                                                                                                                                                                                                                                                                                                                                                                                                                                                                                                                                                                                                                                                                                                                                                             |
| TSC22 domain family 3                                                                                                                                                                                                                                                                                                                                                                                                                                                                                                                                                                                                                                                                                                                                                                                  |
| fatty acid binding protein 3, muscle and heart                                                                                                                                                                                                                                                                                                                                                                                                                                                                                                                                                                                                                                                                                                                                                         |
| Zinc finger protein 313                                                                                                                                                                                                                                                                                                                                                                                                                                                                                                                                                                                                                                                                                                                                                                                |
| succinate dehydrogenase complex, subunit C, integral membrane protein                                                                                                                                                                                                                                                                                                                                                                                                                                                                                                                                                                                                                                                                                                                                  |
| cell division cycle associated 3                                                                                                                                                                                                                                                                                                                                                                                                                                                                                                                                                                                                                                                                                                                                                                       |
| t-complex protein 1                                                                                                                                                                                                                                                                                                                                                                                                                                                                                                                                                                                                                                                                                                                                                                                    |
| proteasome (prosome, macropain) subunit, beta type 2                                                                                                                                                                                                                                                                                                                                                                                                                                                                                                                                                                                                                                                                                                                                                   |
| SH3 domain binding glutamic acid-rich protein-like 3                                                                                                                                                                                                                                                                                                                                                                                                                                                                                                                                                                                                                                                                                                                                                   |
| insulin-like growth factor binding protein 4                                                                                                                                                                                                                                                                                                                                                                                                                                                                                                                                                                                                                                                                                                                                                           |
| neuroepithelial cell transforming gene 1                                                                                                                                                                                                                                                                                                                                                                                                                                                                                                                                                                                                                                                                                                                                                               |
| interferon activated gene 203 /// interferon activated gene 204 /// similar to interferon activated gene 205 /// interferon activated gene 205 /// myeloid cell nuclear differentiation antigen /// similar to Interferon-activatable protein 205 (IFI-205) (D3 protein) /// similar to Interferon-activatable protein 204 (Ifi-204) (Interferon-inducible protein p204)                                                                                                                                                                                                                                                                                                                                                                                                                               |
| autophagy-related 5 (yeast)                                                                                                                                                                                                                                                                                                                                                                                                                                                                                                                                                                                                                                                                                                                                                                            |
| testis expressed gene 264                                                                                                                                                                                                                                                                                                                                                                                                                                                                                                                                                                                                                                                                                                                                                                              |
| keratin associated protein 9-1                                                                                                                                                                                                                                                                                                                                                                                                                                                                                                                                                                                                                                                                                                                                                                         |
| exportin 1, CRM1 homolog (yeast)                                                                                                                                                                                                                                                                                                                                                                                                                                                                                                                                                                                                                                                                                                                                                                       |
| TSC22 domain family 4                                                                                                                                                                                                                                                                                                                                                                                                                                                                                                                                                                                                                                                                                                                                                                                  |
| cyclin D1                                                                                                                                                                                                                                                                                                                                                                                                                                                                                                                                                                                                                                                                                                                                                                                              |
| cyclin D1                                                                                                                                                                                                                                                                                                                                                                                                                                                                                                                                                                                                                                                                                                                                                                                              |
| RIKEN cDNA 1110038F14 gene                                                                                                                                                                                                                                                                                                                                                                                                                                                                                                                                                                                                                                                                                                                                                                             |
| thyroid hormone receptor interactor 12                                                                                                                                                                                                                                                                                                                                                                                                                                                                                                                                                                                                                                                                                                                                                                 |
| nischarin                                                                                                                                                                                                                                                                                                                                                                                                                                                                                                                                                                                                                                                                                                                                                                                              |
| ribophorin I                                                                                                                                                                                                                                                                                                                                                                                                                                                                                                                                                                                                                                                                                                                                                                                           |
| protease, serine, 23                                                                                                                                                                                                                                                                                                                                                                                                                                                                                                                                                                                                                                                                                                                                                                                   |
| ---                                                                                                                                                                                                                                                                                                                                                                                                                                                                                                                                                                                                                                                                                                                                                                                                    |
| ribosomal protein L29 /// similar to 60S ribosomal protein L29 /// hypothetical LOC628276 /// similar to 60S ribosomal protein L29 /// hypothetical protein LOC669999 /// similar to 60S ribosomal protein L29 /// similar to 60S ribosomal protein L29 /// similar to 60S ribosomal protein L29 /// hypothetical protein LOC675182 /// similar to 60S ribosomal protein L29 |
| Coenzyme A synthase                                                                                                                                                                                                                                                                                                                                                                                                                                                                                                                                                                                                                                                                                                                                                                                    |
| thioredoxin-like 5                                                                                                                                                                                                                                                                                                                                                                                                                                                                                                                                                                                                                                                                                                                                                                                     |
| cytoskeleton associated protein 5                                                                                                                                                                                                                                                                                                                                                                                                                                                                                                                                                                                                                                                                                                                                                                      |
| inositol hexaphosphate kinase 1                                                                                                                                                                                                                                                                                                                                                                                                                                                                                                                                                                                                                                                                                                                                                                        |
| ---                                                                                                                                                                                                                                                                                                                                                                                                                                                                                                                                                                                                                                                                                                                                                                                                    |
| E26 avian leukemia oncogene 2, 3' domain                                                                                                                                                                                                                                                                                                                                                                                                                                                                                                                                                                                                                                                                                                                                                               |
| desmoplakin                                                                                                                                                                                                                                                                                                                                                                                                                                                                                                                                                                                                                                                                                                                                                                                            |
| adaptor-related protein complex AP-1, mu subunit 1                                                                                                                                                                                                                                                                                                                                                                                                                                                                                                                                                                                                                                                                                                                                                     |
| presenilin enhancer 2 homolog (C. elegans)                                                                                                                                                                                                                                                                                                                                                                                                                                                                                                                                                                                                                                                                                                                                                             |
| eukaryotic translation initiation factor 3, subunit 10 (theta)                                                                                                                                                                                                                                                                                                                                                                                                                                                                                                                                                                                                                                                                                                                                         |
| eukaryotic translation initiation factor 2, subunit 3, structural gene X-linked                                                                                                                                                                                                                                                                                                                                                                                                                                                                                                                                                                                                                                                                                                                        |

|                                                                                                                                                                                              |
|----------------------------------------------------------------------------------------------------------------------------------------------------------------------------------------------|
| eukaryotic translation initiation factor 2, subunit 1 alpha                                                                                                                                  |
| chloride intracellular channel 4 (mitochondrial)                                                                                                                                             |
| chloride intracellular channel 4 (mitochondrial)                                                                                                                                             |
| chloride intracellular channel 4 (mitochondrial)                                                                                                                                             |
| Ras-related GTP binding A                                                                                                                                                                    |
| Rho, GDP dissociation inhibitor (GDI) beta                                                                                                                                                   |
| prostaglandin E synthase 3 (cytosolic)                                                                                                                                                       |
| La ribonucleoprotein domain family, member 1 /// similar to la related protein isoform 1                                                                                                     |
| thyroid hormone receptor associated protein 3                                                                                                                                                |
| thyroid hormone receptor associated protein 3                                                                                                                                                |
| proteasome (prosome, macropain) subunit, beta type 7                                                                                                                                         |
| v-raf-leukemia viral oncogene 1                                                                                                                                                              |
| host cell factor C1 regulator 1 (XPO1-dependent)                                                                                                                                             |
| ubiquitin-like 5                                                                                                                                                                             |
| ubiquitin-like 5                                                                                                                                                                             |
| Rab acceptor 1 (prenylated)                                                                                                                                                                  |
| keratin complex 1, acidic, gene 18                                                                                                                                                           |
| cyclin D binding myb-like transcription factor 1                                                                                                                                             |
| cyclin D binding myb-like transcription factor 1                                                                                                                                             |
| Yip1 domain family, member 5                                                                                                                                                                 |
| ubiquitin-conjugating enzyme E2S                                                                                                                                                             |
| uroporphyrinogen decarboxylase                                                                                                                                                               |
| hydroxysteroid (17-beta) dehydrogenase 12                                                                                                                                                    |
| metaxin 1                                                                                                                                                                                    |
| lymphocyte cytosolic protein 1                                                                                                                                                               |
| ATP synthase, H+ transporting, mitochondrial F1 complex, delta subunit                                                                                                                       |
| CCR4-NOT transcription complex, subunit 2                                                                                                                                                    |
| N-acylsphingosine amidohydrolase 1                                                                                                                                                           |
| ---                                                                                                                                                                                          |
| cytochrome b5 reductase 3                                                                                                                                                                    |
| histocompatibility 2, class II antigen E beta                                                                                                                                                |
| RIKEN cDNA 9130011J15 gene                                                                                                                                                                   |
| histone 1, H1c                                                                                                                                                                               |
| melanoma antigen, family D, 2                                                                                                                                                                |
| AKT1 substrate 1 (proline-rich)                                                                                                                                                              |
| secretoglobin, family 1A, member 1 (uteroglobin)                                                                                                                                             |
| ---                                                                                                                                                                                          |
| cyclin B2                                                                                                                                                                                    |
| similar to General transcription factor II-I (GTFII-I) (TFII-I) (Bruton tyrosine kinase-associated protein 135) (BTK-associated protein 135) (BAP-135)                                       |
| general transcription factor II I /// similar to General transcription factor II-I (GTFII-I) (TFII-I) (Bruton tyrosine kinase-associated protein 135) (BTK-associated protein 135) (BAP-135) |
| FK506 binding protein 5                                                                                                                                                                      |
| tissue specific transplantation antigen P35B                                                                                                                                                 |
| dynactin 2                                                                                                                                                                                   |
| dynactin 2                                                                                                                                                                                   |
| ATPase, H+ transporting, lysosomal V0 subunit E                                                                                                                                              |
| proteasome (prosome, macropain) 26S subunit, non-ATPase, 4                                                                                                                                   |
| heterogeneous nuclear ribonucleoprotein D                                                                                                                                                    |
| annexin A6                                                                                                                                                                                   |
| procollagen, type I, alpha 1                                                                                                                                                                 |
| fibulin 1                                                                                                                                                                                    |
| fibulin 1                                                                                                                                                                                    |
| fibulin 1                                                                                                                                                                                    |
| RIKEN cDNA 2210010A19 gene                                                                                                                                                                   |

|                                                                                                                                                                                                                                    |
|------------------------------------------------------------------------------------------------------------------------------------------------------------------------------------------------------------------------------------|
| U1 small nuclear ribonucleoprotein 1C                                                                                                                                                                                              |
| keratin complex 2, basic, gene 6b                                                                                                                                                                                                  |
| keratin complex 2, basic, gene 5                                                                                                                                                                                                   |
| apolipoprotein H                                                                                                                                                                                                                   |
| RAB18, member RAS oncogene family                                                                                                                                                                                                  |
| keratin complex 1, acidic, gene 10                                                                                                                                                                                                 |
| squalene epoxidase                                                                                                                                                                                                                 |
| nuclear transport factor 2 /// similar to Nuclear transport factor 2 (NTF-2) |
| 3-hydroxy-3-methylglutaryl-Coenzyme A lyase                                                                                                                                                                                        |
| 3-hydroxy-3-methylglutaryl-Coenzyme A synthase 1                                                                                                                                                                                   |
| mitochondrial ribosomal protein S18A                                                                                                                                                                                               |
| mitochondrial ribosomal protein S18A                                                                                                                                                                                               |
| N-acetylneuraminate pyruvate lyase                                                                                                                                                                                                 |
| signal transducer and activator of transcription 6                                                                                                                                                                                 |
| E26 avian leukemia oncogene 1, 5' domain                                                                                                                                                                                           |
| internexin neuronal intermediate filament protein, alpha                                                                                                                                                                           |
| internexin neuronal intermediate filament protein, alpha                                                                                                                                                                           |
| OTU domain, ubiquitin aldehyde binding 1                                                                                                                                                                                           |
| growth arrest specific 2                                                                                                                                                                                                           |
| growth arrest specific 2                                                                                                                                                                                                           |
| DNA segment, Chr 11, ERATO Doi 18, expressed                                                                                                                                                                                       |
| exportin, tRNA (nuclear export receptor for tRNAs)                                                                                                                                                                                 |
| jumonji, AT rich interactive domain 2                                                                                                                                                                                              |
| DnaJ (Hsp40) homolog, subfamily C, member 3                                                                                                                                                                                        |
| RIKEN cDNA 2410004B18 gene                                                                                                                                                                                                         |
| interleukin 6 signal transducer                                                                                                                                                                                                    |
| Wilms' tumour 1-associating protein                                                                                                                                                                                                |
| protein-L-isoaspartate (D-aspartate) O-methyltransferase 1                                                                                                                                                                         |
| protein-L-isoaspartate (D-aspartate) O-methyltransferase 1                                                                                                                                                                         |
| expressed sequence AU024076                                                                                                                                                                                                        |
| NAD(P)H dehydrogenase, quinone 1                                                                                                                                                                                                   |
| NAD(P)H dehydrogenase, quinone 1                                                                                                                                                                                                   |
| mbt domain containing 1                                                                                                                                                                                                            |
| eukaryotic translation initiation factor 4E binding protein 2                                                                                                                                                                      |
| ATP-binding cassette, sub-family A (ABC1), member 1                                                                                                                                                                                |
| ---                                                                                                                                                                                                                                |
| transformation related protein 53 binding protein 1                                                                                                                                                                                |
| solute carrier family 5 (sodium/glucose cotransporter), member 1                                                                                                                                                                   |
| serine peptidase inhibitor, Kazal type 4                                                                                                                                                                                           |
| pleckstrin homology domain containing, family A (phosphoinositide binding specific) member 1                                                                                                                                       |
| RIKEN cDNA 2700029M09 gene                                                                                                                                                                                                         |
| DEAD (Asp-Glu-Ala-Asp) box polypeptide 21                                                                                                                                                                                          |
| neuroblastoma ras oncogene                                                                                                                                                                                                         |
| BMS1-like, ribosome assembly protein (yeast)                                                                                                                                                                                       |
| golgi apparatus protein 1                                                                                                                                                                                                          |
| histidine triad nucleotide binding protein 2                                                                                                                                                                                       |
| RIKEN cDNA 2310079N02 gene                                                                                                                                                                                                         |
| uridine-cytidine kinase 2                                                                                                                                                                                                          |
| suppressor of var1, 3-like 1 (S. cerevisiae)                                                                                                                                                                                       |
| glucosamine-phosphate N-acetyltransferase 1                                                                                                                                                                                        |
| oncoprotein induced transcript 1                                                                                                                                                                                                   |
| phospholipase D2                                                                                                                                                                                                                   |
| nudix (nucleoside diphosphate linked moiety X)-type motif 1                                                                                                                                                                        |

|                                                                                                                                                                   |
|-------------------------------------------------------------------------------------------------------------------------------------------------------------------|
| dolichyl pyrophosphate phosphatase 1                                                                                                                              |
| WD repeat domain 13                                                                                                                                               |
| hexokinase 2                                                                                                                                                      |
| meiotic recombination 11 homolog A (S. cerevisiae)                                                                                                                |
| guanine nucleotide binding protein (G protein), gamma 11                                                                                                          |
| regulator of G-protein signaling 16                                                                                                                               |
| kinesin family member 1B                                                                                                                                          |
| insulin degrading enzyme                                                                                                                                          |
| uridine-cytidine kinase 1                                                                                                                                         |
| RIKEN cDNA 1110057K04 gene                                                                                                                                        |
| tissue factor pathway inhibitor 2                                                                                                                                 |
| immediate early response 3                                                                                                                                        |
| cornichon homolog 4 (Drosophila)                                                                                                                                  |
| Son cell proliferation protein                                                                                                                                    |
| spermatogenesis associated 5                                                                                                                                      |
| adaptor-related protein complex 3, sigma 2 subunit                                                                                                                |
| similar to LSM5 homolog, U6 small nuclear RNA associated /// hypothetical protein LOC665903 /// hypothetical protein LOC669241 /// hypothetical protein LOC675489 |
| A kinase (PRKA) anchor protein 8                                                                                                                                  |
| gap junction membrane channel protein beta 6                                                                                                                      |
| angiogenin, ribonuclease A family, member 1                                                                                                                       |
| elongation of very long chain fatty acids (FEN1/Elo2, SUR4/Elo3, yeast)-like 2                                                                                    |
| Harvey rat sarcoma oncogene, subgroup R                                                                                                                           |
| Far upstream element (FUSE) binding protein 1                                                                                                                     |
| inhibitor of growth family, member 1                                                                                                                              |
| ubiquitin specific peptidase 52                                                                                                                                   |
| inositol polyphosphate-5-phosphatase B                                                                                                                            |
| inositol polyphosphate-5-phosphatase B                                                                                                                            |
| RIKEN cDNA 1110051M20 gene                                                                                                                                        |
| hemogen                                                                                                                                                           |
| hemogen                                                                                                                                                           |
| TBC1 domain family, member 14                                                                                                                                     |
| vacuolar protein sorting 45 (yeast)                                                                                                                               |
| solute carrier family 6 (neurotransmitter transporter, taurine), member 6                                                                                         |
| putative homeodomain transcription factor 1                                                                                                                       |
| beta-1,3-glucuronyltransferase 3 (glucuronosyltransferase I)                                                                                                      |
| Ngfi-A binding protein 1                                                                                                                                          |
| coiled-coil domain containing 12                                                                                                                                  |
| coiled-coil domain containing 12                                                                                                                                  |
| cyclin-dependent kinase 2                                                                                                                                         |
| cyclin-dependent kinase 2                                                                                                                                         |
| scaffold attachment factor B                                                                                                                                      |
| ornithine transcarbamylase                                                                                                                                        |
| BTB and CNC homology 1                                                                                                                                            |
| RNA guanylyltransferase and 5'-phosphatase                                                                                                                        |
| RIKEN cDNA 2010008E23 gene                                                                                                                                        |
| ELOVL family member 6, elongation of long chain fatty acids (yeast)                                                                                               |
| solute carrier family 19 (sodium/hydrogen exchanger), member 1                                                                                                    |
| cryptochrome 1 (photolyase-like)                                                                                                                                  |
| cryptochrome 1 (photolyase-like)                                                                                                                                  |
| DnaJ (Hsp40) homolog, subfamily C, member 13                                                                                                                      |
| cDNA sequence BC004728                                                                                                                                            |
| ankyrin repeat domain 13c                                                                                                                                         |
| lymphocyte antigen 86                                                                                                                                             |

|                                                                                                                                                                                                                                                                                                                                                                                                                                                                                                                                                                                                                                                                                                                                                                                                                                                                                          |
|------------------------------------------------------------------------------------------------------------------------------------------------------------------------------------------------------------------------------------------------------------------------------------------------------------------------------------------------------------------------------------------------------------------------------------------------------------------------------------------------------------------------------------------------------------------------------------------------------------------------------------------------------------------------------------------------------------------------------------------------------------------------------------------------------------------------------------------------------------------------------------------|
| THUMP domain containing 1                                                                                                                                                                                                                                                                                                                                                                                                                                                                                                                                                                                                                                                                                                                                                                                                                                                                |
| coatomer protein complex, subunit gamma                                                                                                                                                                                                                                                                                                                                                                                                                                                                                                                                                                                                                                                                                                                                                                                                                                                  |
| ilvB (bacterial acetolactate synthase)-like                                                                                                                                                                                                                                                                                                                                                                                                                                                                                                                                                                                                                                                                                                                                                                                                                                              |
| eukaryotic translation elongation factor 1 alpha 2                                                                                                                                                                                                                                                                                                                                                                                                                                                                                                                                                                                                                                                                                                                                                                                                                                       |
| zinc finger, SWIM domain containing 1                                                                                                                                                                                                                                                                                                                                                                                                                                                                                                                                                                                                                                                                                                                                                                                                                                                    |
| beta galactoside alpha 2,6 sialyltransferase 1                                                                                                                                                                                                                                                                                                                                                                                                                                                                                                                                                                                                                                                                                                                                                                                                                                           |
| beta galactoside alpha 2,6 sialyltransferase 1                                                                                                                                                                                                                                                                                                                                                                                                                                                                                                                                                                                                                                                                                                                                                                                                                                           |
| solute carrier family 38, member 2                                                                                                                                                                                                                                                                                                                                                                                                                                                                                                                                                                                                                                                                                                                                                                                                                                                       |
| zinc finger protein 95                                                                                                                                                                                                                                                                                                                                                                                                                                                                                                                                                                                                                                                                                                                                                                                                                                                                   |
| DNA segment, Chr 10, ERATO Doi 438, expressed                                                                                                                                                                                                                                                                                                                                                                                                                                                                                                                                                                                                                                                                                                                                                                                                                                            |
| phosphofructokinase, muscle                                                                                                                                                                                                                                                                                                                                                                                                                                                                                                                                                                                                                                                                                                                                                                                                                                                              |
| oxysterol binding protein-like 11                                                                                                                                                                                                                                                                                                                                                                                                                                                                                                                                                                                                                                                                                                                                                                                                                                                        |
| expressed sequence AI132487                                                                                                                                                                                                                                                                                                                                                                                                                                                                                                                                                                                                                                                                                                                                                                                                                                                              |
| G-protein signalling modulator 3 (AGS3-like, C. elegans)                                                                                                                                                                                                                                                                                                                                                                                                                                                                                                                                                                                                                                                                                                                                                                                                                                 |
| G-protein signalling modulator 3 (AGS3-like, C. elegans)                                                                                                                                                                                                                                                                                                                                                                                                                                                                                                                                                                                                                                                                                                                                                                                                                                 |
| plastin 3 (T-isoform)                                                                                                                                                                                                                                                                                                                                                                                                                                                                                                                                                                                                                                                                                                                                                                                                                                                                    |
| RIKEN cDNA 4732484G22 gene                                                                                                                                                                                                                                                                                                                                                                                                                                                                                                                                                                                                                                                                                                                                                                                                                                                               |
| B-cell leukemia/lymphoma 10                                                                                                                                                                                                                                                                                                                                                                                                                                                                                                                                                                                                                                                                                                                                                                                                                                                              |
| protocadherin gamma subfamily B, 1 /// protocadherin gamma subfamily B, 2 /// protocadherin gamma subfamily B, 4 /// protocadherin gamma subfamily B, 5 /// protocadherin gamma subfamily B, 6 /// protocadherin gamma subfamily B, 7 /// protocadherin gamma subfamily B, 8 /// protocadherin gamma subfamily C, 3 /// protocadherin gamma subfamily C, 4 /// protocadherin gamma subfamily C, 5 /// protocadherin gamma subfamily A, 1 /// protocadherin gamma subfamily A, 2 /// protocadherin gamma subfamily A, 3 /// protocadherin gamma subfamily A, 4 /// protocadherin gamma subfamily A, 5 /// protocadherin gamma subfamily A, 6 /// protocadherin gamma subfamily A, 7 /// protocadherin gamma subfamily A, 8 /// protocadherin gamma subfamily A, 9 /// protocadherin gamma subfamily A, 10 /// protocadherin gamma subfamily A, 11 /// protocadherin gamma subfamily A, 12 |
| NOL1/NOP2/Sun domain family 2                                                                                                                                                                                                                                                                                                                                                                                                                                                                                                                                                                                                                                                                                                                                                                                                                                                            |
| NOL1/NOP2/Sun domain family 2                                                                                                                                                                                                                                                                                                                                                                                                                                                                                                                                                                                                                                                                                                                                                                                                                                                            |
| NOL1/NOP2/Sun domain family 2                                                                                                                                                                                                                                                                                                                                                                                                                                                                                                                                                                                                                                                                                                                                                                                                                                                            |
| RIKEN cDNA 1810046J19 gene                                                                                                                                                                                                                                                                                                                                                                                                                                                                                                                                                                                                                                                                                                                                                                                                                                                               |
| DAZ associated protein 2                                                                                                                                                                                                                                                                                                                                                                                                                                                                                                                                                                                                                                                                                                                                                                                                                                                                 |
| LSM3 homolog, U6 small nuclear RNA associated (S. cerevisiae)                                                                                                                                                                                                                                                                                                                                                                                                                                                                                                                                                                                                                                                                                                                                                                                                                            |
| SET translocation                                                                                                                                                                                                                                                                                                                                                                                                                                                                                                                                                                                                                                                                                                                                                                                                                                                                        |
| expressed sequence AL033326                                                                                                                                                                                                                                                                                                                                                                                                                                                                                                                                                                                                                                                                                                                                                                                                                                                              |
| caspase 6                                                                                                                                                                                                                                                                                                                                                                                                                                                                                                                                                                                                                                                                                                                                                                                                                                                                                |
| expressed sequence AI462493                                                                                                                                                                                                                                                                                                                                                                                                                                                                                                                                                                                                                                                                                                                                                                                                                                                              |
| serine/threonine kinase 38                                                                                                                                                                                                                                                                                                                                                                                                                                                                                                                                                                                                                                                                                                                                                                                                                                                               |
| pre-B-cell colony-enhancing factor 1                                                                                                                                                                                                                                                                                                                                                                                                                                                                                                                                                                                                                                                                                                                                                                                                                                                     |
| eukaryotic translation initiation factor 2B, subunit 1 (alpha)                                                                                                                                                                                                                                                                                                                                                                                                                                                                                                                                                                                                                                                                                                                                                                                                                           |
| chloride channel 3                                                                                                                                                                                                                                                                                                                                                                                                                                                                                                                                                                                                                                                                                                                                                                                                                                                                       |
| chloride channel 3                                                                                                                                                                                                                                                                                                                                                                                                                                                                                                                                                                                                                                                                                                                                                                                                                                                                       |
| chloride channel 3                                                                                                                                                                                                                                                                                                                                                                                                                                                                                                                                                                                                                                                                                                                                                                                                                                                                       |
| CCAAT/enhancer binding protein zeta                                                                                                                                                                                                                                                                                                                                                                                                                                                                                                                                                                                                                                                                                                                                                                                                                                                      |
| CCAAT/enhancer binding protein zeta                                                                                                                                                                                                                                                                                                                                                                                                                                                                                                                                                                                                                                                                                                                                                                                                                                                      |
| methionine adenosyltransferase II, beta                                                                                                                                                                                                                                                                                                                                                                                                                                                                                                                                                                                                                                                                                                                                                                                                                                                  |
| methionine adenosyltransferase II, beta                                                                                                                                                                                                                                                                                                                                                                                                                                                                                                                                                                                                                                                                                                                                                                                                                                                  |
| solute carrier family 30 (zinc transporter), member 5                                                                                                                                                                                                                                                                                                                                                                                                                                                                                                                                                                                                                                                                                                                                                                                                                                    |
| solute carrier family 30 (zinc transporter), member 5                                                                                                                                                                                                                                                                                                                                                                                                                                                                                                                                                                                                                                                                                                                                                                                                                                    |
| signal peptidase complex subunit 1 homolog (S. cerevisiae)                                                                                                                                                                                                                                                                                                                                                                                                                                                                                                                                                                                                                                                                                                                                                                                                                               |
| pituitary tumor-transforming 1 interacting protein                                                                                                                                                                                                                                                                                                                                                                                                                                                                                                                                                                                                                                                                                                                                                                                                                                       |
| Josephin domain containing 3                                                                                                                                                                                                                                                                                                                                                                                                                                                                                                                                                                                                                                                                                                                                                                                                                                                             |
| ---                                                                                                                                                                                                                                                                                                                                                                                                                                                                                                                                                                                                                                                                                                                                                                                                                                                                                      |
| RAB5A, member RAS oncogene family                                                                                                                                                                                                                                                                                                                                                                                                                                                                                                                                                                                                                                                                                                                                                                                                                                                        |
| DNA segment, Chr 1, ERATO Doi 161, expressed                                                                                                                                                                                                                                                                                                                                                                                                                                                                                                                                                                                                                                                                                                                                                                                                                                             |
| DNA segment, Chr 1, ERATO Doi 161, expressed                                                                                                                                                                                                                                                                                                                                                                                                                                                                                                                                                                                                                                                                                                                                                                                                                                             |
| UDP-glucose pyrophosphorylase 2                                                                                                                                                                                                                                                                                                                                                                                                                                                                                                                                                                                                                                                                                                                                                                                                                                                          |
| casein kinase II, alpha 2, polypeptide                                                                                                                                                                                                                                                                                                                                                                                                                                                                                                                                                                                                                                                                                                                                                                                                                                                   |
| casein kinase II, alpha 2, polypeptide                                                                                                                                                                                                                                                                                                                                                                                                                                                                                                                                                                                                                                                                                                                                                                                                                                                   |



|                                                                                                                                                                                                                                                                      |
|----------------------------------------------------------------------------------------------------------------------------------------------------------------------------------------------------------------------------------------------------------------------|
| Hbs1-like (S. cerevisiae)                                                                                                                                                                                                                                            |
| peroxisomal delta3, delta2-enoyl-Coenzyme A isomerase                                                                                                                                                                                                                |
| leucine rich repeat containing 59                                                                                                                                                                                                                                    |
| RIKEN cDNA 1110059P08 gene                                                                                                                                                                                                                                           |
| protein tyrosine phosphatase 4a1 /// protein tyrosine phosphatase 4a1-like /// protein tyrosine phosphatase 4a1 pseudogene /// protein tyrosine phosphatase 4a1-like /// similar to protein tyrosine phosphatase 4a1 /// similar to protein tyrosine phosphatase 4a1 |
| CCR4-NOT transcription complex, subunit 8                                                                                                                                                                                                                            |
| peroxisomal biogenesis factor 13                                                                                                                                                                                                                                     |
| destrin                                                                                                                                                                                                                                                              |
| claudin 3                                                                                                                                                                                                                                                            |
| phenylalanine-tRNA synthetase-like, beta subunit                                                                                                                                                                                                                     |
| RIKEN cDNA 1810008A14 gene                                                                                                                                                                                                                                           |
| meningioma expressed antigen 5 (hyaluronidase)                                                                                                                                                                                                                       |
| sphingosine-1-phosphate phosphatase 1                                                                                                                                                                                                                                |
| DNA segment, Chr 13, Wayne State University 50, expressed                                                                                                                                                                                                            |
| RAB8A, member RAS oncogene family                                                                                                                                                                                                                                    |
| RIKEN cDNA 4930570C03 gene                                                                                                                                                                                                                                           |
| pellino 1                                                                                                                                                                                                                                                            |
| nudix (nucleoside diphosphate linked moiety X)-type motif 21                                                                                                                                                                                                         |
| acyl-CoA synthetase long-chain family member 1                                                                                                                                                                                                                       |
| transmembrane protein 126A                                                                                                                                                                                                                                           |
| nuclear cap binding protein subunit 2                                                                                                                                                                                                                                |
| WD repeat domain 77                                                                                                                                                                                                                                                  |
| similar to signal sequence receptor, alpha                                                                                                                                                                                                                           |
| archain 1                                                                                                                                                                                                                                                            |
| Archain 1                                                                                                                                                                                                                                                            |
| archain 1                                                                                                                                                                                                                                                            |
| sulfide quinone reductase-like (yeast)                                                                                                                                                                                                                               |
| preproenkephalin 1                                                                                                                                                                                                                                                   |
| preproenkephalin 1                                                                                                                                                                                                                                                   |
| aurora kinase A interacting protein 1                                                                                                                                                                                                                                |
| RIKEN cDNA 2610003J06 gene                                                                                                                                                                                                                                           |
| cyclin-dependent kinase inhibitor 2D (p19, inhibits CDK4)                                                                                                                                                                                                            |
| dynactin 3                                                                                                                                                                                                                                                           |
| death associated protein 3                                                                                                                                                                                                                                           |
| DNA segment, Chr 10, ERATO Doi 214, expressed                                                                                                                                                                                                                        |
| expressed sequence AI413782                                                                                                                                                                                                                                          |
| nucleotide binding protein 1                                                                                                                                                                                                                                         |
| eukaryotic translation initiation factor 2B, subunit 2 beta                                                                                                                                                                                                          |
| coenzyme Q9 homolog (yeast)                                                                                                                                                                                                                                          |
| VATPase, H+ transporting, lysosomal V1 subunit E1                                                                                                                                                                                                                    |
| isocitrate dehydrogenase 3 (NAD+) alpha                                                                                                                                                                                                                              |
| adducin 1 (alpha)                                                                                                                                                                                                                                                    |
| RIKEN cDNA 2900073G15 gene /// myosin light chain, regulatory B                                                                                                                                                                                                      |
| myosin light chain, regulatory B                                                                                                                                                                                                                                     |
| cytochrome P450, family 2, subfamily d, polypeptide 9 /// RIKEN cDNA 9030605E09 gene                                                                                                                                                                                 |
| cytochrome P450, family 2, subfamily d, polypeptide 26                                                                                                                                                                                                               |
| NADH dehydrogenase (ubiquinone) 1 beta subcomplex 4                                                                                                                                                                                                                  |
| mbt domain containing 1                                                                                                                                                                                                                                              |
| RIKEN cDNA 1810042K04 gene                                                                                                                                                                                                                                           |
| reticulon 1                                                                                                                                                                                                                                                          |
| major facilitator superfamily domain containing 1                                                                                                                                                                                                                    |
| major facilitator superfamily domain containing 1                                                                                                                                                                                                                    |
| sorting nexin 1                                                                                                                                                                                                                                                      |

|                                                                                                                  |
|------------------------------------------------------------------------------------------------------------------|
| autophagy-related 4B (yeast)                                                                                     |
| poly(rC) binding protein 1                                                                                       |
| trafficking protein particle complex 5                                                                           |
| ring finger protein 167                                                                                          |
| sorting nexin 10                                                                                                 |
| general transcription factor III A                                                                               |
| general transcription factor III A                                                                               |
| general transcription factor III A                                                                               |
| LIM domain and actin binding 1                                                                                   |
| glyceronephosphate O-acyltransferase                                                                             |
| afamin                                                                                                           |
| sulfotransferase family 4A, member 1                                                                             |
| inositol 1,4,5-triphosphate receptor 2                                                                           |
| G protein-coupled receptor 132                                                                                   |
| regulator of G-protein signaling 6                                                                               |
| vomeronasal 1 receptor, A1                                                                                       |
| forkhead box B2                                                                                                  |
| glutamate receptor, ionotropic, delta 1                                                                          |
| forkhead box D2                                                                                                  |
| glutamate receptor, metabotropic 8                                                                               |
| enamelin                                                                                                         |
| serine/threonine kinase 22 substrate 1                                                                           |
| otogelin                                                                                                         |
| contactin associated protein 1                                                                                   |
| folliculogenesis specific basic helix-loop-helix                                                                 |
| androgen binding protein alpha                                                                                   |
| zinc finger protein, subfamily 1A, 2 (Helios)                                                                    |
| purinergic receptor P2X-like 1, orphan receptor                                                                  |
| probasin                                                                                                         |
| glucagon                                                                                                         |
| tachykinin receptor 2                                                                                            |
| tachykinin receptor 1                                                                                            |
| homeo box A13                                                                                                    |
| sema domain, immunoglobulin domain (Ig), transmembrane domain (TM) and short cytoplasmic domain, (semaphorin) 4B |
| histone 2, H2bb                                                                                                  |
| seminal vesicle protein, secretion 2                                                                             |
| cadherin 9                                                                                                       |
| cadherin 10                                                                                                      |
| guanosine diphosphate (GDP) dissociation inhibitor 2                                                             |
| poliovirus receptor                                                                                              |
| butyrylcholinesterase                                                                                            |
| gamma-aminobutyric acid (GABA-A) receptor, subunit alpha 3                                                       |
| DNA segme, Chr 8, Wayne State University 26, expressed                                                           |
| RIKEN cDNA 4833441D16 gene                                                                                       |
| solute carrier organic anion transporter family, member 5A1                                                      |
| insulin receptor substrate 3                                                                                     |
| phospholipase A2, group V                                                                                        |
| expressed sequence AA408396                                                                                      |
| DNA segment, Chr 3, Wayne State University 167, expressed                                                        |
| DNA segment, Chr 1, Wayne State University 158, expressed                                                        |
| expressed sequence AA516738                                                                                      |
| Density-regulated protein                                                                                        |
| ---                                                                                                              |

|                                                                                                                                                                                                                                                                                              |
|----------------------------------------------------------------------------------------------------------------------------------------------------------------------------------------------------------------------------------------------------------------------------------------------|
| expressed sequence C76533                                                                                                                                                                                                                                                                    |
| forkhead box B1                                                                                                                                                                                                                                                                              |
| MAX dimerization protein 1                                                                                                                                                                                                                                                                   |
| expressed sequence C79248                                                                                                                                                                                                                                                                    |
| expressed sequence C79490                                                                                                                                                                                                                                                                    |
| ---                                                                                                                                                                                                                                                                                          |
| glutathione peroxidase 5                                                                                                                                                                                                                                                                     |
| Opioid growth factor receptor-like 1                                                                                                                                                                                                                                                         |
| proprotein convertase subtilisin/kexin type 1                                                                                                                                                                                                                                                |
| expressed sequence C81521                                                                                                                                                                                                                                                                    |
| chemokine (C-C motif) receptor 4                                                                                                                                                                                                                                                             |
| Gardner-Rasheed feline sarcoma viral (Fgr) oncogene homolog                                                                                                                                                                                                                                  |
| Friend leukemia integration 1                                                                                                                                                                                                                                                                |
| IAP promoted placental gene                                                                                                                                                                                                                                                                  |
| glycoprotein hormones, alpha subunit                                                                                                                                                                                                                                                         |
| phosphodiesterase 6B, cGMP, rod receptor, beta polypeptide                                                                                                                                                                                                                                   |
| transforming growth factor, beta receptor II                                                                                                                                                                                                                                                 |
| keratin complex 2, basic, gene 17                                                                                                                                                                                                                                                            |
| WNT1 inducible signaling pathway protein 2                                                                                                                                                                                                                                                   |
| eyes absent 1 homolog (Drosophila)                                                                                                                                                                                                                                                           |
| eyes absent 1 homolog (Drosophila)                                                                                                                                                                                                                                                           |
| amelogenin X chromosome                                                                                                                                                                                                                                                                      |
| protein tyrosine phosphatase, receptor type, N polypeptide 2                                                                                                                                                                                                                                 |
| glial cells missing homolog 2 (Drosophila)                                                                                                                                                                                                                                                   |
| glial cells missing homolog 2 (Drosophila)                                                                                                                                                                                                                                                   |
| glial cells missing homolog 1 (Drosophila)                                                                                                                                                                                                                                                   |
| vascular endothelial growth factor C                                                                                                                                                                                                                                                         |
| myosin VIIa                                                                                                                                                                                                                                                                                  |
| kallikrein 1-related peptidase b3                                                                                                                                                                                                                                                            |
| cytochrome P450, family 1, subfamily a, polypeptide 1                                                                                                                                                                                                                                        |
| kallikrein 1-related peptidase b9 /// kallikrein 1 /// kallikrein 1-related peptidase b1 /// kallikrein 1-related pepidase b4 /// RIKEN cDNA 1700127D06 gene /// similar to Glandular kallikrein K3 precursor (Tissue kallikrein-3) (mGK-3) (7S nerve growth factor gamma chain) (Gamma-NGF) |
| interferon alpha family, gene 2                                                                                                                                                                                                                                                              |
| histone 1, H1e                                                                                                                                                                                                                                                                               |
| potassium voltage-gated channel, shaker-related, subfamily, member 6                                                                                                                                                                                                                         |
| E26 avian leukemia oncogene 1, 5' domain                                                                                                                                                                                                                                                     |
| dentin sialophosphoprotein /// similar to Dentin sialophosphoprotein precursor (Dentin matrix protein 3) (DMP-3)                                                                                                                                                                             |
| vomeronasal 2, receptor, 10 /// vomeronasal 2, receptor, 11                                                                                                                                                                                                                                  |
| N-acetyltransferase 1 (arylamine N-acetyltransferase)                                                                                                                                                                                                                                        |
| matrix metallopeptidase 10                                                                                                                                                                                                                                                                   |
| immunoglobulin kappa chain variable 4-91                                                                                                                                                                                                                                                     |
| T-cell receptor beta, variable 13 /// similar to T-cell receptor beta chain V region E1 precursor                                                                                                                                                                                            |
| 2-cell-stage, variable group, member 1                                                                                                                                                                                                                                                       |
| mast cell protease 1                                                                                                                                                                                                                                                                         |
| mast cell protease 1                                                                                                                                                                                                                                                                         |
| cysteine-rich secretory protein 3                                                                                                                                                                                                                                                            |
| src homology three (SH3) and cysteine rich domain                                                                                                                                                                                                                                            |
| repetin                                                                                                                                                                                                                                                                                      |
| ATP-binding cassette, sub-family B (MDR/TAP), member 4                                                                                                                                                                                                                                       |
| orosomucoid 2                                                                                                                                                                                                                                                                                |
| mast cell protease 9 /// chymase 2, mast cell                                                                                                                                                                                                                                                |
| lysosomal trafficking regulator                                                                                                                                                                                                                                                              |
| adenylate cyclase 8                                                                                                                                                                                                                                                                          |
| defensin related cryptdin, related sequence 10 /// defensin related cryptdin, related sequence 2                                                                                                                                                                                             |

|                                                                                                                                                                                                                                                                                                                                                                                                                                                                                       |
|---------------------------------------------------------------------------------------------------------------------------------------------------------------------------------------------------------------------------------------------------------------------------------------------------------------------------------------------------------------------------------------------------------------------------------------------------------------------------------------|
| transient receptor potential cation channel, subfamily C, member 1                                                                                                                                                                                                                                                                                                                                                                                                                    |
| transient receptor potential cation channel, subfamily C, member 1                                                                                                                                                                                                                                                                                                                                                                                                                    |
| testicular serine protease 2                                                                                                                                                                                                                                                                                                                                                                                                                                                          |
| complement factor H-related protein                                                                                                                                                                                                                                                                                                                                                                                                                                                   |
| killer cell lectin-like receptor subfamily B member 1B                                                                                                                                                                                                                                                                                                                                                                                                                                |
| eukaryotic translation initiation factor 1A /// similar to Eukaryotic translation initiation factor 1A (eIF-1A) (eIF-4C) /// similar to Eukaryotic translation initiation factor 1A (eIF-1A) (eIF-4C) /// similar to X-linked eukaryotic translation initiation factor 1A /// similar to X-linked eukaryotic translation initiation factor 1A /// similar to X-linked eukaryotic translation initiation factor 1A /// similar to X-linked eukaryotic translation initiation factor 1A |
| histocompatibility 2, T region locus 24                                                                                                                                                                                                                                                                                                                                                                                                                                               |
| colony stimulating factor 2 receptor, beta 1, low-affinity (granulocyte-macrophage)                                                                                                                                                                                                                                                                                                                                                                                                   |
| colony stimulating factor 2 receptor, beta 1, low-affinity (granulocyte-macrophage) /// colony stimulating factor 2 receptor, beta 2, low-affinity (granulocyte-macrophage)                                                                                                                                                                                                                                                                                                           |
| cDNA sequence AF067061                                                                                                                                                                                                                                                                                                                                                                                                                                                                |
| deleted in azoospermia-like                                                                                                                                                                                                                                                                                                                                                                                                                                                           |
| SKI-like                                                                                                                                                                                                                                                                                                                                                                                                                                                                              |
| guanine nucleotide binding protein, alpha 15                                                                                                                                                                                                                                                                                                                                                                                                                                          |
| LIM homeobox protein 8                                                                                                                                                                                                                                                                                                                                                                                                                                                                |
| interleukin 1 alpha                                                                                                                                                                                                                                                                                                                                                                                                                                                                   |
| histone 2, H3c1 /// histone 2, H3c2 /// histone1, H3d /// histone 1, H3b /// histone 1, H3e /// histone 2, H3b                                                                                                                                                                                                                                                                                                                                                                        |
| cystic fibrosis transmembrane conductance regulator homolog                                                                                                                                                                                                                                                                                                                                                                                                                           |
| cystic fibrosis transmembrane conductance regulator homolog                                                                                                                                                                                                                                                                                                                                                                                                                           |
| RIKEN cDNA 2810402A17 gene                                                                                                                                                                                                                                                                                                                                                                                                                                                            |
| ---                                                                                                                                                                                                                                                                                                                                                                                                                                                                                   |
| chemokine (C-C motif) ligand 7                                                                                                                                                                                                                                                                                                                                                                                                                                                        |
| coagulation factor II (thrombin) receptor-like 2                                                                                                                                                                                                                                                                                                                                                                                                                                      |
| muscle, skeletal, receptor tyrosine kinase                                                                                                                                                                                                                                                                                                                                                                                                                                            |
| integrin alpha L                                                                                                                                                                                                                                                                                                                                                                                                                                                                      |
| retinol dehydrogenase 13 (all-trans and 9-cis)                                                                                                                                                                                                                                                                                                                                                                                                                                        |
| eukaryotic translation elongation factor 1 alpha 1                                                                                                                                                                                                                                                                                                                                                                                                                                    |
| ribosomal protein S11 /// similar to ribosomal protein S11                                                                                                                                                                                                                                   |
| RAD21 homolog (S. pombe)                                                                                                                                                                                                                                                                                                                                                                                                                                                              |
| matrix metalloproteinase 8                                                                                                                                                                                                                                                                                                                                                                                                                                                            |
| OTU domain containing 5                                                                                                                                                                                                                                                                                                                                                                                                                                                               |
| Ras association (RalGDS/AF-6) domain family 2                                                                                                                                                                                                                                                                                                                                                                                                                                         |
| killer cell lectin-like receptor subfamily B member 1A                                                                                                                                                                                                                                                                                                                                                                                                                                |
| kallikrein 1-related peptidase b4                                                                                                                                                                                                                                                                                                                                                                                                                                                     |
| interferon activated gene 202B                                                                                                                                                                                                                                                                                                                                                                                                                                                        |
| oxytocin                                                                                                                                                                                                                                                                                                                                                                                                                                                                              |
| killer cell lectin-like receptor, subfamily A, member 4                                                                                                                                                                                                                                                                                                                                                                                                                               |
| albumin 1                                                                                                                                                                                                                                                                                                                                                                                                                                                                             |
| aldehyde dehydrogenase family 1, subfamily A7                                                                                                                                                                                                                                                                                                                                                                                                                                         |
| killer cell lectin-like receptor, subfamily A, member 3 /// killer cell lectin-like receptor subfamily A, member 9                                                                                                                                                                                                                                                                                                                                                                    |
| zinc finger and BTB domain containing 20                                                                                                                                                                                                                                                                                                                                                                                                                                              |
| hemoglobin alpha, adult chain 1                                                                                                                                                                                                                                                                                                                                                                                                                                                       |
| expressed sequence C78142                                                                                                                                                                                                                                                                                                                                                                                                                                                             |
| ---                                                                                                                                                                                                                                                                                                                                                                                                                                                                                   |
| IQ motif containing GTPase activating protein 3                                                                                                                                                                                                                                                                                                                                                                                                                                       |
| DNA segment, Chr 7, ERATO Doi 128, expressed                                                                                                                                                                                                                                                                                                                                                                                                                                          |
| expressed sequence C81272                                                                                                                                                                                                                                                                                                                                                                                                                                                             |
| AU RNA binding protein/enoyl-coenzyme A hydratase                                                                                                                                                                                                                                                                                                                                                                                                                                     |
| tubulin, beta 5                                                                                                                                                                                                                                                                                                                                                                                                                                                                       |
| tubulin, beta 5                                                                                                                                                                                                                                                                                                                                                                                                                                                                       |
| amylase-1,6-glucosidase, 4-alpha-glucanotransferase                                                                                                                                                                                                                                                                                                                                                                                                                                   |
| leukocyte tyrosine kinase                                                                                                                                                                                                                                                                                                                                                                                                                                                             |
| macrophage scavenger receptor 1                                                                                                                                                                                                                                                                                                                                                                                                                                                       |
| selenophosphate synthetase 1                                                                                                                                                                                                                                                                                                                                                                                                                                                          |

|                                                                                                                                                                                                                                                                                                                                                                                              |
|----------------------------------------------------------------------------------------------------------------------------------------------------------------------------------------------------------------------------------------------------------------------------------------------------------------------------------------------------------------------------------------------|
| ferritin heavy chain 1                                                                                                                                                                                                                                                                                                                                                                       |
| hydroxysteroid dehydrogenase-5, delta<5>-3-beta                                                                                                                                                                                                                                                                                                                                              |
| ---                                                                                                                                                                                                                                                                                                                                                                                          |
| solute carrier family 26 (sulfate transporter), member 1                                                                                                                                                                                                                                                                                                                                     |
| ATP-binding cassette, sub-family B (MDR/TAP), member 1B                                                                                                                                                                                                                                                                                                                                      |
| coagulation factor VIII                                                                                                                                                                                                                                                                                                                                                                      |
| Myeloid/lymphoid or mixed lineage-leukemia translocation to 10 homolog (Drosophila)                                                                                                                                                                                                                                                                                                          |
| progesterone receptor membrane component 2                                                                                                                                                                                                                                                                                                                                                   |
| cDNA sequence BC060632                                                                                                                                                                                                                                                                                                                                                                       |
| pre B-cell leukemia transcription factor 1                                                                                                                                                                                                                                                                                                                                                   |
| pre B-cell leukemia transcription factor 1 /// region containing RIKEN cDNA 2310056B04 gene; pre B-cell leukemia transcription factor 1                                                                                                                                                                                                                                                      |
| histone 3, H2a /// histone 1, H2ac /// histone 1, H2ad /// histone 1, H2ae /// histone 1, H2ag /// histone 1, H2ah /// histone 1, H2ak /// histone 1, H2an /// histone 1, H2ao /// histone 1, H2ab /// histone 1, H2ai /// similar to histone 2a                                                                                                                                             |
| pyruvate dehydrogenase (lipoamide) beta                                                                                                                                                                                                                                                                                                                                                      |
| solute carrier family 25 (mitochondrial carrier, citrate transporter), member 1                                                                                                                                                                                                                                                                                                              |
| tumor susceptibility gene 101                                                                                                                                                                                                                                                                                                                                                                |
| Ewing sarcoma breakpoint region 1                                                                                                                                                                                                                                                                                                                                                            |
| general transcription factor II H, polypeptide 1 /// necdin                                                                                                                                                                                                                                                                                                                                  |
| general transcription factor II H, polypeptide 1                                                                                                                                                                                                                                                                                                                                             |
| growth arrest specific 1                                                                                                                                                                                                                                                                                                                                                                     |
| guanine nucleotide binding protein, alpha inhibiting 3                                                                                                                                                                                                                                                                                                                                       |
| 2,3-bisphosphoglycerate mutase                                                                                                                                                                                                                                                                                                                                                               |
| serine (or cysteine) peptidase inhibitor, clade H, member 1                                                                                                                                                                                                                                                                                                                                  |
| O-linked N-acetylglucosamine (GlcNAc) transferase (UDP-N-acetylglucosamine:polypeptide-N-acetylglucosaminyl transferase)                                                                                                                                                                                                                                                                     |
| cyclin I                                                                                                                                                                                                                                                                                                                                                                                     |
| cyclin I                                                                                                                                                                                                                                                                                                                                                                                     |
| X-box binding protein 1                                                                                                                                                                                                                                                                                                                                                                      |
| SET domain containing 3 /// hypothetical protein LOC622830 /// similar to CG32732-PA /// similar to CG32732-PA                                                                                                                                                                                                                                                                               |
| ribosomal protein L23a                                                                                                                                                                                                                                                                                                                                                                       |
| phospholipase A2, activating protein                                                                                                                                                                                                                                                                                                                                                         |
| integrin beta 4 binding protein                                                                                                                                                                                                                                                                                                                                                              |
| FXYP domain-containing ion transport regulator 2                                                                                                                                                                                                                                                                                                                                             |
| opioid receptor, sigma 1                                                                                                                                                                                                                                                                                                                                                                     |
| transmembrane protein 70                                                                                                                                                                                                                                                                                                                                                                     |
| cDNA sequence BC005537                                                                                                                                                                                                                                                                                                                                                                       |
| cathepsin B                                                                                                                                                                                                                                                                                                                                                                                  |
| heterogeneous nuclear ribonucleoprotein H2                                                                                                                                                                                                                                                                                                                                                   |
| folistatin-like 1                                                                                                                                                                                                                                                                                                                                                                            |
| cathepsin H                                                                                                                                                                                                                                                                                                                                                                                  |
| tubulin, beta 2a                                                                                                                                                                                                                                                                                                                                                                             |
| expressed sequence C79445                                                                                                                                                                                                                                                                                                                                                                    |
| eukaryotic translation initiation factor 3, subunit 8                                                                                                                                                                                                                                                                                                                                        |
| proliferin /// proliferin 2 /// similar to Proliferin 3 precursor (Mitogen-regulated protein 3) /// similar to mitogen regulated protein, proliferin 4 /// similar to mitogen regulated protein, proliferin 4 /// similar to mitogen regulated protein, proliferin 4                                                                                                                         |
| nucleobindin 1                                                                                                                                                                                                                                                                                                                                                                               |
| hexosaminidase A                                                                                                                                                                                                                                                                                                                                                                             |
| proteasome (prosome, macropain) subunit, alpha type 5                                                                                                                                                                                                                                                                                                                                        |
| bleomycin hydrolase                                                                                                                                                                                                                                                                                                                                                                          |
| polymerase (DNA-directed), delta 4                                                                                                                                                                                                                                                                                                                                                           |
| ribosomal protein L39                                                                                                                                                                                                                                                                                                                                                                        |
| zinc finger CCCH type containing 11A                                                                                                                                                                                                                                                                                                                                                         |
| macrophage migration inhibitory factor /// similar to Macrophage migration inhibitory factor (MIF) (Phenylpyruvate tautomerase) (Glycosylation-inhibiting factor) (GIF) (Delayed early response protein 6) (DER6) /// similar to Macrophage migration inhibitory factor (MIF) (Phenylpyruvate tautomerase) (Glycosylation-inhibiting factor) (GIF) (Delayed early response protein 6) (DER6) |
| Macrophage migration inhibitory factor                                                                                                                                                                                                                                                                                                                                                       |
| acyl-CoA thioesterase 9                                                                                                                                                                                                                                                                                                                                                                      |
| glutamate-ammonia ligase (glutamine synthetase)                                                                                                                                                                                                                                                                                                                                              |

|                                                                                                                                                                                                          |
|----------------------------------------------------------------------------------------------------------------------------------------------------------------------------------------------------------|
| guanine nucleotide binding protein, beta 1                                                                                                                                                               |
| guanine nucleotide binding protein, beta 1                                                                                                                                                               |
| prohibitin                                                                                                                                                                                               |
| WAS protein family, member 2                                                                                                                                                                             |
| N-methylpurine-DNA glycosylase                                                                                                                                                                           |
| translocase of inner mitochondrial membrane 17a                                                                                                                                                          |
| RIKEN cDNA 4930453N24 gene                                                                                                                                                                               |
| dynein light chain roadblock-type 1                                                                                                                                                                      |
| dynein light chain roadblock-type 1                                                                                                                                                                      |
| ubiquitin-like domain containing CTD phosphatase 1                                                                                                                                                       |
| mitochondrial ribosomal protein S16                                                                                                                                                                      |
| glutaminyI-tRNA synthetase                                                                                                                                                                               |
| AE binding protein 2                                                                                                                                                                                     |
| SAR1 gene homolog B (S. cerevisiae)                                                                                                                                                                      |
| SAR1 gene homolog B (S. cerevisiae)                                                                                                                                                                      |
| sphingomyelin phosphodiesterase, acid-like 3A                                                                                                                                                            |
| amyloid beta (A4) precursor-like protein 1                                                                                                                                                               |
| mitochondrial ribosomal protein L20                                                                                                                                                                      |
| golgi reassembly stacking protein 2                                                                                                                                                                      |
| BTB (POZ) domain containing 1 /// similar to BTB (POZ) domain containing 1 (predicted) /// similar to BTB (POZ) domain containing 1 (predicted) /// similar to BTB (POZ) domain containing 1 (predicted) |
| BTB (POZ) domain containing 1                                                                                                                                                                            |
| cyclin-dependent kinase inhibitor 1A (P21)                                                                                                                                                               |
| transmembrane protein 30A                                                                                                                                                                                |
| unc-84 homolog A (C. elegans)                                                                                                                                                                            |
| calnexin                                                                                                                                                                                                 |
| vesicle-associated membrane protein, associated protein A                                                                                                                                                |
| male enhanced antigen 1                                                                                                                                                                                  |
| male enhanced antigen 1                                                                                                                                                                                  |
| male enhanced antigen 1                                                                                                                                                                                  |
| RIKEN cDNA 2610301B20 gene                                                                                                                                                                               |
| YTH domain family 2                                                                                                                                                                                      |
| heterogeneous nuclear ribonucleoprotein A/B                                                                                                                                                              |
| glutathione peroxidase 4                                                                                                                                                                                 |
| RNA binding motif protein 18                                                                                                                                                                             |
| expressed sequence AA536749                                                                                                                                                                              |
| surfactant associated protein C                                                                                                                                                                          |
| superoxide dismutase 3, extracellular                                                                                                                                                                    |
| transmembrane emp24 protein transport domain containing 7                                                                                                                                                |
| alcohol dehydrogenase 1 (class I)                                                                                                                                                                        |
| RIKEN cDNA 1110001J03 gene                                                                                                                                                                               |
| RIKEN cDNA 1110001J03 gene                                                                                                                                                                               |
| mitochondrial ribosomal protein S17                                                                                                                                                                      |
| nuclear distribution gene E homolog 1 (A nidulans)                                                                                                                                                       |
| mitochondrial ribosomal protein S21                                                                                                                                                                      |
| RIKEN cDNA E430034L04 gene                                                                                                                                                                               |
| RIKEN cDNA 2210415F13 gene                                                                                                                                                                               |
| peptidylprolyl isomerase B                                                                                                                                                                               |
| cytochrome P450, family 51                                                                                                                                                                               |
| F-box only protein 8                                                                                                                                                                                     |
| alanyl-tRNA synthetase                                                                                                                                                                                   |
| pyridoxine 5'-phosphate oxidase                                                                                                                                                                          |
| Pyridoxine 5'-phosphate oxidase                                                                                                                                                                          |
| OTU domain containing 4                                                                                                                                                                                  |

|                                                                 |
|-----------------------------------------------------------------|
| OTU domain containing 4                                         |
| proline-rich Gla (G-carboxyglutamic acid) polypeptide 2         |
| DnaJ (Hsp40) homolog, subfamily C, member 19                    |
| fatty acid binding protein 9, testis                            |
| tumor necrosis factor receptor superfamily, member 1b           |
| protein tyrosine phosphatase, non-receptor type 1               |
| thrombospondin 2                                                |
| ubiquitin-fold modifier 1                                       |
| platelet derived growth factor, alpha                           |
| cDNA sequence BC008155                                          |
| angiotensin II receptor, type 2                                 |
| Transducin (beta)-like 1 X-linked                               |
| meprin 1 beta                                                   |
| zinc finger protein 277                                         |
| CD53 antigen                                                    |
| methylcrotonoyl-Coenzyme A carboxylase 1 (alpha)                |
| eukaryotic translation initiation factor 2 alpha kinase 4       |
| cleavage stimulation factor, 3' pre-RNA, subunit 1              |
| protein kinase, cAMP dependent regulatory, type I beta          |
| COMM domain containing 5                                        |
| mitogen activated protein kinase kinase kinase 3                |
| mitogen activated protein kinase kinase kinase 3                |
| thyroid hormone receptor interactor 6                           |
| LAS1-like (S. cerevisiae)                                       |
| RIKEN cDNA C330012H03 gene                                      |
| Rac GTPase-activating protein 1                                 |
| anaphase promoting complex subunit 4                            |
| ankyrin repeat domain 40                                        |
| DiGeorge syndrome critical region gene 6                        |
| prolyl endopeptidase-like                                       |
| RIKEN cDNA 1110013L07 gene                                      |
| Caseinolytic peptidase X (E.coli)                               |
| Caseinolytic peptidase X (E.coli)                               |
| vinculin                                                        |
| vinculin                                                        |
| glucose-6-phosphate dehydrogenase X-linked                      |
| DNA segment, Chr 19, Wayne State University 12, expressed       |
| nuclear transcription factor-Y gamma                            |
| nuclear transcription factor-Y gamma                            |
| protein phosphatase 4, regulatory subunit 2                     |
| cyclin-dependent kinase inhibitor 3                             |
| RNA binding motif, single stranded interacting protein 1        |
| jumonji domain containing 1B                                    |
| iron responsive element binding protein 2                       |
| nuclear mitotic apparatus protein 1                             |
| inositol 1,4,5-triphosphate receptor 1                          |
| RIKEN cDNA 2310037I24 gene                                      |
| cDNA sequence BC018507                                          |
| dual specificity phosphatase 11 (RNA/RNP complex 1-interacting) |
| expressed in non-metastatic cells 3                             |
| expressed in non-metastatic cells 3                             |
| RIKEN cDNA 1810073G14 gene                                      |
| synaptotagmin binding, cytoplasmic RNA interacting protein      |

|                                                                                                                                                                                                                                                                                                                                                                                                                                                                                                       |
|-------------------------------------------------------------------------------------------------------------------------------------------------------------------------------------------------------------------------------------------------------------------------------------------------------------------------------------------------------------------------------------------------------------------------------------------------------------------------------------------------------|
| guanine nucleotide binding protein (G protein), gamma 3 subunit                                                                                                                                                                                                                                                                                                                                                                                                                                       |
| phosphatidylethanolamine N-methyltransferase                                                                                                                                                                                                                                                                                                                                                                                                                                                          |
| phosphatase and tensin homolog                                                                                                                                                                                                                                                                                                                                                                                                                                                                        |
| phosphatase and tensin homolog                                                                                                                                                                                                                                                                                                                                                                                                                                                                        |
| transmembrane protein 115                                                                                                                                                                                                                                                                                                                                                                                                                                                                             |
| synaptopodin                                                                                                                                                                                                                                                                                                                                                                                                                                                                                          |
| coatomer protein complex, subunit beta 1                                                                                                                                                                                                                                                                                                                                                                                                                                                              |
| cDNA sequence BC026782                                                                                                                                                                                                                                                                                                                                                                                                                                                                                |
| cDNA sequence BC026782                                                                                                                                                                                                                                                                                                                                                                                                                                                                                |
| RIKEN cDNA A030007L17 gene                                                                                                                                                                                                                                                                                                                                                                                                                                                                            |
| endomucin                                                                                                                                                                                                                                                                                                                                                                                                                                                                                             |
| v-ral simian leukemia viral oncogene homolog A (ras related)                                                                                                                                                                                                                                                                                                                                                                                                                                          |
| cubilin (intrinsic factor-cobalamin receptor)                                                                                                                                                                                                                                                                                                                                                                                                                                                         |
| cubilin (intrinsic factor-cobalamin receptor)                                                                                                                                                                                                                                                                                                                                                                                                                                                         |
| A kinase (PRKA) anchor protein 8                                                                                                                                                                                                                                                                                                                                                                                                                                                                      |
| DNA segment, Chr 17, Wayne State University 92, expressed                                                                                                                                                                                                                                                                                                                                                                                                                                             |
| polymerase (RNA) II (DNA directed) polypeptide K                                                                                                                                                                                                                                                                                                                                                                                                                                                      |
| Luc7 homolog (S. cerevisiae)-like                                                                                                                                                                                                                                                                                                                                                                                                                                                                     |
| translocated promoter region                                                                                                                                                                                                                                                                                                                                                                                                                                                                          |
| procollagen-lysine, 2-oxoglutarate 5-dioxygenase 3                                                                                                                                                                                                                                                                                                                                                                                                                                                    |
| Tnf receptor-associated factor 3                                                                                                                                                                                                                                                                                                                                                                                                                                                                      |
| RIKEN cDNA 1810063B07 gene                                                                                                                                                                                                                                                                                                                                                                                                                                                                            |
| solute carrier family 22 (organic cation transporter), member 17                                                                                                                                                                                                                                                                                                                                                                                                                                      |
| F-box only protein 6b                                                                                                                                                                                                                                                                                                                                                                                                                                                                                 |
| aldo-keto reductase family 1, member C12                                                                                                                                                                                                                                                                                                                                                                                                                                                              |
| neuropilin 1                                                                                                                                                                                                                                                                                                                                                                                                                                                                                          |
| expressed sequence AU021838                                                                                                                                                                                                                                                                                                                                                                                                                                                                           |
| glutathione S-transferase, theta 1                                                                                                                                                                                                                                                                                                                                                                                                                                                                    |
| CD47 antigen (Rh-related antigen, integrin-associated signal transducer)                                                                                                                                                                                                                                                                                                                                                                                                                              |
| RIKEN cDNA 9430010O03 gene                                                                                                                                                                                                                                                                                                                                                                                                                                                                            |
| A kinase (PRKA) anchor protein (gravin) 12                                                                                                                                                                                                                                                                                                                                                                                                                                                            |
| SID1 transmembrane family, member 2                                                                                                                                                                                                                                                                                                                                                                                                                                                                   |
| ubiquitin specific peptidase 18                                                                                                                                                                                                                                                                                                                                                                                                                                                                       |
| DNA segment, Chr 16, human D22S680E, expressed                                                                                                                                                                                                                                                                                                                                                                                                                                                        |
| retinol saturase (all trans retinol 13,14 reductase)                                                                                                                                                                                                                                                                                                                                                                                                                                                  |
| ubiquitin specific peptidase 21                                                                                                                                                                                                                                                                                                                                                                                                                                                                       |
| RIKEN cDNA 3100002L24 gene /// RIKEN cDNA 9230108I15 gene /// hypothetical LOC329575 /// similar to gonadotropin inducible ovarian transcription factor 1 /// similar to zinc finger protein 709 /// similar to gonadotropin inducible ovarian transcription factor 1 /// similar to zinc finger protein 97 /// similar to gonadotropin inducible ovarian transcription factor 1 |
| ATPase type 13A1                                                                                                                                                                                                                                                                                                                                                                                                                                                                                      |
| prolactin receptor                                                                                                                                                                                                                                                                                                                                                                                                                                                                                    |
| RIKEN cDNA 1110059H15 gene                                                                                                                                                                                                                                                                                                                                                                                                                                                                            |
| protein regulator of cytokinesis 1                                                                                                                                                                                                                                                                                                                                                                                                                                                                    |
| jumonji domain containing 1A                                                                                                                                                                                                                                                                                                                                                                                                                                                                          |
| importin 4                                                                                                                                                                                                                                                                                                                                                                                                                                                                                            |
| importin 4                                                                                                                                                                                                                                                                                                                                                                                                                                                                                            |
| calbindin 2                                                                                                                                                                                                                                                                                                                                                                                                                                                                                           |
| cyclin-dependent kinase 9 (CDC2-related kinase)                                                                                                                                                                                                                                                                                                                                                                                                                                                       |
| programmed cell death 6 interacting protein                                                                                                                                                                                                                                                                                                                                                                                                                                                           |
| Josephin domain containing 2                                                                                                                                                                                                                                                                                                                                                                                                                                                                          |
| Yip1 domain family, member 1                                                                                                                                                                                                                                                                                                                                                                                                                                                                          |
| cytochrome P450, family 2, subfamily c, polypeptide 70                                                                                                                                                                                                                                                                                                                                                                                                                                                |
| mediator of RNA polymerase II transcription, subunit 28 homolog (yeast)                                                                                                                                                                                                                                                                                                                                                                                                                               |
| RIKEN cDNA 0610012D09 gene                                                                                                                                                                                                                                                                                                                                                                                                                                                                            |



|                                                                                                |
|------------------------------------------------------------------------------------------------|
| eukaryotic translation initiation factor 2B, subunit 4 delta                                   |
| sarcolipin                                                                                     |
| small nuclear ribonucleoprotein D2                                                             |
| cysteine and histidine-rich domain (CHORD)-containing, zinc-binding protein 1                  |
| C1q domain containing 2                                                                        |
| succinate dehydrogenase complex, subunit B, iron sulfur (Ip)                                   |
| threonyl-tRNA synthetase                                                                       |
| dynein light chain Tctex-type 3                                                                |
| homocysteine-inducible, endoplasmic reticulum stress-inducible, ubiquitin-like domain member 1 |
| brain protein 44                                                                               |
| proline-rich nuclear receptor coactivator 2                                                    |
| solute carrier family 16 (monocarboxylic acid transporters), member 7                          |
| breast carcinoma amplified sequence 2                                                          |
| calpastatin                                                                                    |
| cell division cycle associated 7                                                               |
| acetyl-Coenzyme A acyltransferase 2 (mitochondrial 3-oxoacyl-Coenzyme A thiolase)              |
| nitrogen fixation gene 1 (S. cerevisiae)                                                       |
| transaldolase 1                                                                                |
| mitochondrial ribosomal protein L2                                                             |
| DnaJ (Hsp40) homolog, subfamily A, member 2                                                    |
| structure specific recognition protein 1                                                       |
| asparaginyl-tRNA synthetase                                                                    |
| potassium channel modulatory factor 1                                                          |
| cytochrome c-1                                                                                 |
| peroxisome biogenesis factor 19                                                                |
| peroxisome biogenesis factor 19                                                                |
| nucleoporin 35                                                                                 |
| RIKEN cDNA 1500032L24 gene                                                                     |
| RAB geranylgeranyl transferase, b subunit                                                      |
| RIKEN cDNA 1200015F23 gene                                                                     |
| platelet derived growth factor receptor, alpha polypeptide                                     |
| exosome component 8                                                                            |
| insulin-like growth factor binding protein 3                                                   |
| insulin-like growth factor binding protein 3                                                   |
| glyoxylate reductase/hydroxypyruvate reductase                                                 |
| Glyoxylate reductase/hydroxypyruvate reductase                                                 |
| RIKEN cDNA 2310036O22 gene                                                                     |
| transmembrane protein 134                                                                      |
| SEC13-like 1 (S. cerevisiae)                                                                   |
| protein phosphatase 3, catalytic subunit, alpha isoform                                        |
| cell division cycle and apoptosis regulator 1                                                  |
| cell division cycle and apoptosis regulator 1                                                  |
| flotillin 1                                                                                    |
| quaking                                                                                        |
| ARP10 actin-related protein 10 homolog (S. cerevisiae)                                         |
| ring finger protein 26                                                                         |
| anaphase-promoting complex subunit 5                                                           |
| serine incorporator 1                                                                          |
| scotin gene                                                                                    |
| RIKEN cDNA 2310065K24 gene                                                                     |
| syndecan 2                                                                                     |
| HIG1 domain family, member 2A                                                                  |
| RIKEN cDNA 2700055K07 gene                                                                     |

|                                                                                     |
|-------------------------------------------------------------------------------------|
| nucleolar protein 5A                                                                |
| peptidylprolyl isomerase (cyclophilin)-like 2                                       |
| peptidylprolyl isomerase (cyclophilin)-like 2                                       |
| peptidylprolyl isomerase (cyclophilin)-like 2                                       |
| cutA divalent cation tolerance homolog (E. coli)                                    |
| cutA divalent cation tolerance homolog (E. coli)                                    |
| insulin-like growth factor 2 receptor                                               |
| kinesin family member 22                                                            |
| RIKEN cDNA 1110038D17 gene                                                          |
| tetraspanin 13                                                                      |
| polymerase (DNA-directed), epsilon 4 (p12 subunit)                                  |
| polymerase (DNA-directed), epsilon 4 (p12 subunit)                                  |
| RIKEN cDNA 4930566A11 gene                                                          |
| ring-box 1                                                                          |
| ring-box 1                                                                          |
| anaphase promoting complex subunit 2                                                |
| nuclear receptor co-repressor 2                                                     |
| NADH dehydrogenase (ubiquinone) 1 beta subcomplex, 2                                |
| NADH dehydrogenase (ubiquinone) 1 beta subcomplex, 2                                |
| asparagine synthetase                                                               |
| Mid1 interacting protein 1 (gastrulation specific G12-like (zebrafish))             |
| Mid1 interacting protein 1 (gastrulation specific G12-like (zebrafish))             |
| ADP-ribosylation factor-like 6 interacting protein 4                                |
| transmembrane protein 97                                                            |
| WD repeat domain, phosphoinositide interacting 2                                    |
| WD repeat domain, phosphoinositide interacting 2                                    |
| RIKEN cDNA 5230400G24 gene                                                          |
| capping protein (actin filament) muscle Z-line, beta                                |
| capping protein (actin filament) muscle Z-line, beta                                |
| actin related protein 2/3 complex, subunit 1A                                       |
| transmembrane protein 66                                                            |
| 6-phosphogluconolactonase                                                           |
| adenylate kinase 2                                                                  |
| coatomer protein complex, subunit zeta 1                                            |
| pleckstrin homology domain containing, family O member 1                            |
| pleckstrin homology domain containing, family O member 1                            |
| pleckstrin homology domain containing, family O member 1                            |
| CDC42 small effector 2                                                              |
| SCAN domain-containing 1                                                            |
| zinc and ring finger 1                                                              |
| zinc and ring finger 1                                                              |
| zinc and ring finger 1                                                              |
| H2-K region expressed gene 2                                                        |
| mitochondrial ribosomal protein S18B                                                |
| CTD (carboxy-terminal domain, RNA polymerase II, polypeptide A) small phosphatase 2 |
| DNA segment, Chr 14, Abbott 1 expressed                                             |
| sema domain, transmembrane domain (TM), and cytoplasmic domain, (semaphorin) 6D     |
| expressed sequence AA414993                                                         |
| ---                                                                                 |
| Transcribed locus                                                                   |
| Transcribed locus                                                                   |
| ubiquitin C                                                                         |
| angiogenin, ribonuclease A family, member 3                                         |

|                                                                                |
|--------------------------------------------------------------------------------|
| heterogeneous nuclear ribonucleoprotein L                                      |
| zinc finger protein 40                                                         |
| ---                                                                            |
| expressed sequence BB001228                                                    |
| expressed sequence AA517841                                                    |
| expressed sequence AA517858                                                    |
| interleukin 9 receptor                                                         |
| ---                                                                            |
| heat shock protein 90kDa alpha (cytosolic), class A member 1                   |
| ATP-binding cassette, sub-family C (CFTR/MRP), member 2                        |
| ---                                                                            |
| ---                                                                            |
| clusterin                                                                      |
| LUC7-like 2 (S. cerevisiae)                                                    |
| RIKEN cDNA A430106J12 gene                                                     |
| RIKEN cDNA A430106J12 gene                                                     |
| corticotropin releasing hormone receptor 1                                     |
| TAF15 RNA polymerase II, TATA box binding protein (TBP)-associated factor      |
| integrin alpha 4                                                               |
| Calreticulin 4                                                                 |
| Centaurin, gamma 1                                                             |
| FMS-like tyrosine kinase 3                                                     |
| FMS-like tyrosine kinase 3                                                     |
| homeo box A1                                                                   |
| Eph receptor A3                                                                |
| dynein, axonemal, heavy chain 8 /// similar to dynein, axonemal, heavy chain 8 |
| proteoglycan 3                                                                 |
| S100 calcium binding protein A5                                                |
| FK506 binding protein 12-rapamycin associated protein 1                        |
| interferon induced transmembrane protein 6                                     |
| signaling molecule ATTP                                                        |
| RIKEN cDNA A630098A13 gene                                                     |
| urotensin 2 receptor                                                           |
| Scavenger receptor cysteine rich domain containing, group B (4 domains)        |
| adenylate cyclase 4                                                            |
| Dynein, axonemal, heavy chain 8                                                |
| betacellulin, epidermal growth factor family member                            |
| HLA-B associated transcript 2                                                  |
| homeo box C5                                                                   |
| coagulation factor II (thrombin) receptor                                      |
| tubulin tyrosine ligase                                                        |
| zinc finger protein 14                                                         |
| fibroblast growth factor 18                                                    |
| bassoon                                                                        |
| zinc finger protein 105                                                        |
| neurotensin receptor 1                                                         |
| killer cell lectin-like receptor subfamily G, member 1                         |
| 5 hydroxytryptamine (serotonin) receptor 4                                     |
| 5 hydroxytryptamine (serotonin) receptor 4                                     |
| 5 hydroxytryptamine (serotonin) receptor 4                                     |
| ATPase, Ca++ transporting, plasma membrane 2                                   |
| pleckstrin homology, Sec7 and coiled-coil domains 1                            |
| testis-specific protein, Y-encoded-like 1                                      |

|                                                                      |
|----------------------------------------------------------------------|
| SH3 and PX domains 2A                                                |
| fucosyltransferase 9                                                 |
| endoplasmic reticulum (ER) to nucleus signalling 2                   |
| glucose-6-phosphatase, catalytic, 2                                  |
| retinal G protein coupled receptor                                   |
| 5-hydroxytryptamine (serotonin) receptor 2B                          |
| interleukin 18 receptor accessory protein                            |
| neurotrophic tyrosine kinase, receptor, type 3                       |
| chemokine (C-X3-C) receptor 1                                        |
| hypoxia inducible factor 3, alpha subunit                            |
| ubiquitously transcribed tetratricopeptide repeat gene, Y chromosome |
| matrix metallopeptidase 12                                           |
| matrix metallopeptidase 12                                           |
| metallothionein 3                                                    |
| transforming growth factor beta regulated gene 4                     |
| vomeronasal 1 receptor, A2                                           |
| peptidyl arginine deiminase, type I                                  |
| interleukin 13 receptor, alpha 2                                     |
| trophoblast glycoprotein                                             |
| reduced expression 2                                                 |
| myelin transcription factor 1                                        |
| chemokine (C-X-C motif) ligand 1                                     |
| chemokine (C-X-C motif) ligand 1                                     |
| transthyretin                                                        |
| nuclear receptor coactivator 6                                       |
| DNA segment, Chr 8, ERATO Doi 28, expressed                          |
| Crx opposite strand transcript 1                                     |
| DNA segment, Chr 6, ERATO Doi 439, expressed                         |
| angiotensin II, type I receptor-associated protein                   |
| apolipoprotein E                                                     |
| nuclear VCP-like                                                     |
| phosphatidylinositol-4-phosphate 5-kinase, type II, alpha            |
| heat shock protein 90kDa alpha (cytosolic), class B member 1         |
| zinc finger, CCHC domain containing 6                                |
| granzyme M (lymphocyte met-ase 1)                                    |
| guanine nucleotide binding protein, alpha 14                         |
| ---                                                                  |
| plexin A2                                                            |
| ---                                                                  |
| cadherin 4                                                           |
| cadherin 4                                                           |
| Protein serine kinase H1                                             |
| CD2 antigen                                                          |
| cartilage intermediate layer protein 2                               |
| cartilage intermediate layer protein 2                               |
| chloride channel 1                                                   |
| fibroblast growth factor 11                                          |
| expressed sequence AI842396                                          |
| mab-21-like 2 (C. elegans)                                           |
| CD244 natural killer cell receptor 2B4                               |
| potassium channel, subfamily K, member 7                             |
| expressed sequence AI646383                                          |
| transmembrane 7 superfamily member 2                                 |

|                                                                                                                  |
|------------------------------------------------------------------------------------------------------------------|
| CDNA, clone:Y1G0143G21, strand:unspecified                                                                       |
| lysocardiolipin acyltransferase                                                                                  |
| Sema domain, immunoglobulin domain (Ig), transmembrane domain (TM) and short cytoplasmic domain, (semaphorin) 4B |
| histone 1, H1d                                                                                                   |
| cyclic nucleotide gated channel alpha 1                                                                          |
| neuronal PAS domain protein 2                                                                                    |
| ventral anterior homeobox containing gene 1                                                                      |
| glucosaminyl (N-acetyl) transferase 2, I-branching enzyme                                                        |
| BTB (POZ) domain containing 3                                                                                    |
| YTH domain family 3                                                                                              |
| ---                                                                                                              |
| RIKEN cDNA D430019H16 gene                                                                                       |
| Ankyrin repeat domain 44                                                                                         |
| PREDICTED: Mus musculus similar to dachsous 2 isoform 2 (LOC627094), mRNA                                        |
| helicase (DNA) B                                                                                                 |
| cDNA sequence BC038286                                                                                           |
| platelet-activating factor acetylhydrolase, isoform 1b, alpha2 subunit                                           |
| mesoderm development candiate 2                                                                                  |
| RIKEN cDNA 1810037I17 gene                                                                                       |
| phenylalanine hydroxylase                                                                                        |
| RIKEN cDNA 2310003F16 gene                                                                                       |
| RIKEN cDNA 1110019J04 gene                                                                                       |
| procollagen, type II, alpha 1                                                                                    |
| RIKEN cDNA 1110004F10 gene                                                                                       |
| programmed cell death 6                                                                                          |
| OCIA domain containing 1                                                                                         |
| complement component 1, r subcomponent                                                                           |
| complement component 1, r subcomponent                                                                           |
| ubiquitin specific peptidase 15                                                                                  |
| mannoside acetylglucosaminyltransferase 2                                                                        |
| RAS-like, family 11, member B                                                                                    |
| H1 histone family, member 0                                                                                      |
| phosphogluconate dehydrogenase                                                                                   |
| protein disulfide isomerase associated 4                                                                         |
| SMT3 suppressor of mif two 3 homolog 3 (yeast)                                                                   |
| acyl-Coenzyme A dehydrogenase, long-chain                                                                        |
| enoyl Coenzyme A hydratase, short chain, 1, mitochondrial                                                        |
| replication protein A1                                                                                           |
| IMP4, U3 small nucleolar ribonucleoprotein, homolog (yeast)                                                      |
| spastic paraplegia 21 homolog (human)                                                                            |
| translocase of outer mitochondrial membrane 70 homolog A (yeast)                                                 |
| translocase of outer mitochondrial membrane 70 homolog A (yeast)                                                 |
| DEAD (Asp-Glu-Ala-Asp) box polypeptide 54                                                                        |
| actin related protein 2/3 complex, subunit 3                                                                     |
| ADP-ribosylation factor-like 8B                                                                                  |
| somatostatin                                                                                                     |
| ring finger and WD repeat domain 2                                                                               |
| ras homolog gene family, member T1                                                                               |
| arylacetamide deacetylase (esterase)                                                                             |
| RIKEN cDNA 2810432L12 gene                                                                                       |
| translocase of inner mitochondrial membrane 23 homolog (yeast)                                                   |
| cDNA sequence BC010787                                                                                           |
| transmembrane protein 49                                                                                         |

|                                                                                                 |
|-------------------------------------------------------------------------------------------------|
| RIKEN cDNA 4833439L19 gene                                                                      |
| RIKEN cDNA 6330577E15 gene                                                                      |
| RIKEN cDNA 1810034K20 gene                                                                      |
| proteasome (prosome, macropain) 26S subunit, ATPase 2                                           |
| MIF4G domain containing                                                                         |
| Growth factor receptor bound protein 10                                                         |
| RIKEN cDNA 2810405J04 gene                                                                      |
| S100 calcium binding protein A1                                                                 |
| S100 calcium binding protein A1                                                                 |
| S100 calcium binding protein A1                                                                 |
| aspartyl aminopeptidase                                                                         |
| split hand/foot malformation (ectrodactyly) type 1                                              |
| inositol monophosphatase domain containing 1                                                    |
| inositol monophosphatase domain containing 1                                                    |
| COP9 (constitutive photomorphogenic) homolog, subunit 5 (Arabidopsis thaliana)                  |
| basic leucine zipper and W2 domains 2                                                           |
| transmembrane protein 37                                                                        |
| transmembrane protein 37                                                                        |
| coactosin-like 1 (Dictyostelium)                                                                |
| short coiled-coil protein                                                                       |
| EGL nine homolog 1 (C. elegans)                                                                 |
| biotinidase                                                                                     |
| PAK1 interacting protein 1                                                                      |
| cyclin-dependent kinase inhibitor 1C (P57)                                                      |
| ubiquinol-cytochrome c reductase binding protein                                                |
| BUD31 homolog (yeast)                                                                           |
| coagulation factor II (thrombin) receptor                                                       |
| transmembrane protein 59                                                                        |
| differentially expressed in B16F10 1                                                            |
| nuclear DNA binding protein                                                                     |
| vacuolar protein sorting 25 (yeast)                                                             |
| ubiquitin specific peptidase 7                                                                  |
| ubiquitin specific peptidase 7                                                                  |
| proteasome (prosome, macropain) 26S subunit, non-ATPase, 1                                      |
| L-3-hydroxyacyl-Coenzyme A dehydrogenase, short chain                                           |
| phosphatidylserine receptor                                                                     |
| cDNA sequence BC010304                                                                          |
| flightless I homolog (Drosophila)                                                               |
| KDEL (Lys-Asp-Glu-Leu) endoplasmic reticulum protein retention receptor 1                       |
| Parkinson disease (autosomal recessive, early onset) 7                                          |
| procollagen, type VI, alpha 1                                                                   |
| phosphoribosyl pyrophosphate synthetase-associated protein 1                                    |
| timeless interacting protein                                                                    |
| mitochondrial ribosomal protein S15                                                             |
| RIKEN cDNA 2410001C21 gene                                                                      |
| sirtuin 2 (silent mating type information regulation 2, homolog) 2 (S. cerevisiae)              |
| myeloid/lymphoid or mixed-lineage leukemia (trithorax homolog, Drosophila); translocated to, 11 |
| torsin family 1, member B                                                                       |
| myosin IC                                                                                       |
| phosphoribosyl pyrophosphate synthetase 1                                                       |
| NCK-associated protein 1                                                                        |
| syncollin                                                                                       |
| integrin alpha 6                                                                                |

|                                                                                |
|--------------------------------------------------------------------------------|
| protein-L-isoaspartate (D-aspartate) O-methyltransferase 1                     |
| signal transducer and activator of transcription interacting protein 1         |
| regulator of chromosome condensation 2                                         |
| RAB9, member RAS oncogene family                                               |
| cDNA sequence BC004004                                                         |
| RIKEN cDNA 1810015C04 gene                                                     |
| transmembrane BAX inhibitor motif containing 1                                 |
| zinc finger protein 68                                                         |
| zinc finger protein 68                                                         |
| RIKEN cDNA 2900062L11 gene                                                     |
| nuclear receptor coactivator 6                                                 |
| exportin 7                                                                     |
| chromatin assembly factor 1, subunit A (p150)                                  |
| expressed sequence AI507495                                                    |
| drebrin-like                                                                   |
| RIKEN cDNA 6330549H03 gene                                                     |
| angiomotin                                                                     |
| DNA segment, Chr 13, ERATO Doi 608, expressed                                  |
| zinc finger protein 106                                                        |
| transcription elongation factor B (SIII), polypeptide 3                        |
| Unc-51 like kinase 2 (C. elegans)                                              |
| actin related protein 2/3 complex, subunit 5-like                              |
| RAB3A interacting protein                                                      |
| DEAD (Asp-Glu-Ala-Asp) box polypeptide 27                                      |
| DNA segment, Chr 6, Wayne State University 176, expressed                      |
| tropomyosin 4                                                                  |
| tropomyosin 4                                                                  |
| RUN and SH3 domain containing 1                                                |
| insulin-like growth factor 1                                                   |
| insulin-like growth factor 1                                                   |
| ras homolog gene family, member D                                              |
| DNA primase, p58 subunit                                                       |
| retinitis pigmentosa GTPase regulator                                          |
| R3H domain and coiled-coil containing 1                                        |
| deiodinase, iodothyronine, type I                                              |
| phosphoribosyl pyrophosphate amidotransferase                                  |
| phosphoribosyl pyrophosphate amidotransferase                                  |
| unc-119 homolog (C. elegans)                                                   |
| mitochondrial ribosomal protein L45                                            |
| bone morphogenetic protein 1                                                   |
| RIKEN cDNA 6330403K07 gene                                                     |
| synaptonemal complex central element protein 2                                 |
| nuclear domain 10 protein 52                                                   |
| ariadne ubiquitin-conjugating enzyme E2 binding protein homolog 1 (Drosophila) |
| cDNA sequence BC018601                                                         |
| MAD2L1 binding protein                                                         |
| glycosylphosphatidylinositol specific phospholipase D1                         |
| splicing factor, arginine/serine-rich 2, interacting protein                   |
| RIKEN cDNA 1500011J06 gene                                                     |
| guanylate cyclase activator 2b (retina)                                        |
| solute carrier family 30 (zinc transporter), member 4                          |
| bromodomain adjacent to zinc finger domain, 2A                                 |
| CGG triplet repeat binding protein 1                                           |

|                                                                                                |
|------------------------------------------------------------------------------------------------|
| CGG triplet repeat binding protein 1                                                           |
| expressed sequence AI314180                                                                    |
| ---                                                                                            |
| developmental pluripotency associated 2                                                        |
| protein C                                                                                      |
| purinergic receptor P2X, ligand-gated ion channel 4                                            |
| coenzyme Q10 homolog A (yeast)                                                                 |
| alpha-methylacyl-CoA racemase                                                                  |
| asparagine-linked glycosylation 5 homolog (yeast, dolichyl-phosphate beta-glucosyltransferase) |
| exostoses (multiple)-like 3                                                                    |
| RIKEN cDNA 1110019N10 gene                                                                     |
| golgi phosphoprotein 2                                                                         |
| mitofusin 1                                                                                    |
| tetratricopeptide repeat, ankyrin repeat and coiled-coil containing 1                          |
| forkhead box K2                                                                                |
| prostaglandin-endoperoxide synthase 1                                                          |
| ST3 beta-galactoside alpha-2,3-sialyltransferase 4                                             |
| ariadne homolog 2 (Drosophila)                                                                 |
| ubiquilin 1                                                                                    |
| transient receptor potential cation channel, subfamily C, member 4 associated protein          |
| glycine decarboxylase                                                                          |
| RIKEN cDNA C330006A16 gene                                                                     |
| synaptotagmin binding, cytoplasmic RNA interacting protein                                     |
| START domain containing 3                                                                      |
| cathepsin B                                                                                    |
| ---                                                                                            |
| cell division cycle 5-like (S. pombe)                                                          |
| lipoprotein lipase                                                                             |
| replication factor C (activator 1) 5                                                           |
| transmembrane protein 30A                                                                      |
| chromobox homolog 5 (Drosophila HP1a)                                                          |
| cofactor required for Sp1 transcriptional activation, subunit 3                                |
| retinoblastoma-like 2 /// similar to retinoblastoma-like 2                                     |
| RAB11 family interacting protein 5 (class I)                                                   |
| RIKEN cDNA 1700040I03 gene                                                                     |
| dehydrogenase/reductase (SDR family) member 7                                                  |
| RIKEN cDNA 9030623C06 gene                                                                     |
| kelch domain containing 2                                                                      |
| solute carrier family 6 (neurotransmitter transporter, creatine), member 8                     |
| xeroderma pigmentosum, complementation group C                                                 |
| WW domain containing transcription regulator 1                                                 |
| diaphanous homolog 3 (Drosophila)                                                              |
| trafficking protein particle complex 1                                                         |
| seryl-aminoacyl-tRNA synthetase 2                                                              |
| protein phosphatase 4, catalytic subunit                                                       |
| mevalonate kinase /// similar to mevalonate kinase                                             |
| mevalonate kinase                                                                              |
| RIKEN cDNA 0610010K14 gene                                                                     |
| RIKEN cDNA 0610010K14 gene                                                                     |
| RIKEN cDNA 0610010K14 gene                                                                     |
| filamin, beta                                                                                  |
| cholinergic receptor, nicotinic, gamma polypeptide                                             |
| placenta specific 9                                                                            |



|                                                                                                                                                                                                                                                                                                                                                                                                                                                |
|------------------------------------------------------------------------------------------------------------------------------------------------------------------------------------------------------------------------------------------------------------------------------------------------------------------------------------------------------------------------------------------------------------------------------------------------|
| elongation of very long chain fatty acids (FEN1/Elo2, SUR4/Elo3, yeast)-like 1                                                                                                                                                                                                                                                                                                                                                                 |
| WD repeat domain 6                                                                                                                                                                                                                                                                                                                                                                                                                             |
| PREDICTED: Mus musculus similar to nitrogen fixation cluster-like (LOC433217), mRNA                                                                                                                                                                                                                                                                                                                                                            |
| carnitine palmitoyltransferase 2                                                                                                                                                                                                                                                                                                                                                                                                               |
| MOB1, Mps One Binder kinase activator-like 1B (yeast)                                                                                                                                                                                                                                                                                                                                                                                          |
| ---                                                                                                                                                                                                                                                                                                                                                                                                                                            |
| PHD finger protein 5A                                                                                                                                                                                                                                                                                                                                                                                                                          |
| NHP2 non-histone chromosome protein 2-like 1 (S. cerevisiae) /// similar to Nhp2 non-histone chromosome protein 2-like 1 /// similar to NHP2-like protein 1 (High mobility group-like nuclear protein 2 homolog 1) ([U4/U6.U5] tri-snRNP 15.5 kDa protein) (Sperm specific antigen 1) (Fertilization antigen 1) (FA-1) /// similar to Nhp2 non-histone chromosome protein 2-like 1 /// similar to Nhp2 non-histone chromosome protein 2-like 1 |
| melanocyte proliferating gene 1                                                                                                                                                                                                                                                                                                                                                                                                                |
| NADH dehydrogenase (ubiquinone) 1 alpha subcomplex, 7 (B14.5a)                                                                                                                                                                                                                                                                                                                                                                                 |
| mitochondrial ribosomal protein L37                                                                                                                                                                                                                                                                                                                                                                                                            |
| chloride intracellular channel 1                                                                                                                                                                                                                                                                                                                                                                                                               |
| RIKEN cDNA 5830411E10 gene                                                                                                                                                                                                                                                                                                                                                                                                                     |
| DNA segment, Chr 13, Wayne State University 177, expressed                                                                                                                                                                                                                                                                                                                                                                                     |
| DNA segment, Chr 13, Wayne State University 177, expressed                                                                                                                                                                                                                                                                                                                                                                                     |
| COMM domain containing 1                                                                                                                                                                                                                                                                                                                                                                                                                       |
| actin-like 6A                                                                                                                                                                                                                                                                                                                                                                                                                                  |
| ethylmalonic encephalopathy 1                                                                                                                                                                                                                                                                                                                                                                                                                  |
| CD9 antigen                                                                                                                                                                                                                                                                                                                                                                                                                                    |
| EST X83328                                                                                                                                                                                                                                                                                                                                                                                                                                     |
| matrix metalloproteinase 2                                                                                                                                                                                                                                                                                                                                                                                                                     |
| ---                                                                                                                                                                                                                                                                                                                                                                                                                                            |
| SEC14-like 1 (S. cerevisiae)                                                                                                                                                                                                                                                                                                                                                                                                                   |
| COP9 (constitutive photomorphogenic) homolog, subunit 8 (Arabidopsis thaliana)                                                                                                                                                                                                                                                                                                                                                                 |
| Stathmin-like 2                                                                                                                                                                                                                                                                                                                                                                                                                                |
| stathmin-like 2                                                                                                                                                                                                                                                                                                                                                                                                                                |
| stathmin-like 2                                                                                                                                                                                                                                                                                                                                                                                                                                |
| hairy/enhancer-of-split related with YRPW motif 1                                                                                                                                                                                                                                                                                                                                                                                              |
| proteasome (prosome, macropain) 26S subunit, ATPase, 4                                                                                                                                                                                                                                                                                                                                                                                         |
| brain abundant, membrane attached signal protein 1                                                                                                                                                                                                                                                                                                                                                                                             |
| brain abundant, membrane attached signal protein 1                                                                                                                                                                                                                                                                                                                                                                                             |
| mitogen-activated protein kinase kinase kinase kinase 3 /// similar to mitogen-activated protein kinase kinase kinase kinase 3                                                                                                                                                                                                                                                                                                                 |
| isocitrate dehydrogenase 3 (NAD+) beta                                                                                                                                                                                                                                                                                                                                                                                                         |
| WD repeat domain 57 (U5 snRNP specific)                                                                                                                                                                                                                                                                                                                                                                                                        |
| CDK2-associated protein 2                                                                                                                                                                                                                                                                                                                                                                                                                      |
| protein phosphatase 1, regulatory (inhibitor) subunit 2                                                                                                                                                                                                                                                                                                                                                                                        |
| ---                                                                                                                                                                                                                                                                                                                                                                                                                                            |
| damage specific DNA binding protein 1                                                                                                                                                                                                                                                                                                                                                                                                          |
| damage specific DNA binding protein 1                                                                                                                                                                                                                                                                                                                                                                                                          |
| damage specific DNA binding protein 1                                                                                                                                                                                                                                                                                                                                                                                                          |
| WD repeat domain 74                                                                                                                                                                                                                                                                                                                                                                                                                            |
| RAB14, member RAS oncogene family                                                                                                                                                                                                                                                                                                                                                                                                              |
| degenerative spermatocyte homolog 1 (Drosophila)                                                                                                                                                                                                                                                                                                                                                                                               |
| mitochondrial carrier homolog 1 (C. elegans)                                                                                                                                                                                                                                                                                                                                                                                                   |
| sorting and assembly machinery component 50 homolog (S. cerevisiae)                                                                                                                                                                                                                                                                                                                                                                            |
| signal recognition particle 68                                                                                                                                                                                                                                                                                                                                                                                                                 |
| isocitrate dehydrogenase 2 (NADP+), mitochondrial                                                                                                                                                                                                                                                                                                                                                                                              |
| topoisomerase (DNA) I                                                                                                                                                                                                                                                                                                                                                                                                                          |
| solute carrier family 25 (mitochondrial carnitine/acylcarnitine translocase), member 20                                                                                                                                                                                                                                                                                                                                                        |
| thioredoxin-like 2 /// similar to thioredoxin-like 2                                                                                                                                                                                                                                                                                                                                                                                           |
| RIKEN cDNA 2610009E16 gene /// eukaryotic translation initiation factor 5A /// similar to eukaryotic translation initiation factor 5A /// similar to eukaryotic translation initiation factor 5A                                                                                                                                                                                                                                               |
| NADH dehydrogenase (ubiquinone) 1 beta subcomplex, 7                                                                                                                                                                                                                                                                                                                                                                                           |
| DnaJ (Hsp40) homolog, subfamily C, member 8 /// similar to DnaJ (Hsp40) homolog, subfamily C, member 8 (predicted)                                                                                                                                                                                                                                                                                                                             |

|                                                                                                                    |
|--------------------------------------------------------------------------------------------------------------------|
| DnaJ (Hsp40) homolog, subfamily C, member 8 /// similar to DnaJ (Hsp40) homolog, subfamily C, member 8 (predicted) |
| CXXC finger 5                                                                                                      |
| STT3, subunit of the oligosaccharyltransferase complex, homolog B (S. cerevisiae)                                  |
| ubiquitin-like 1 (sentrin) activating enzyme E1A                                                                   |
| adaptor protein complex AP-1, beta 1 subunit                                                                       |
| actin, beta, cytoplasmic                                                                                           |
| lectin, galactose binding, soluble 3                                                                               |
| RIKEN cDNA 2900010M23 gene                                                                                         |
| DNA segment, Chr 3, University of California at Los Angeles 1                                                      |
| vitamin K epoxide reductase complex, subunit 1                                                                     |
| origin recognition complex, subunit 6-like (S. cerevisiae)                                                         |
| cleft lip and palate associated transmembrane protein 1                                                            |
| RIKEN cDNA 0610009D07 gene                                                                                         |
| eukaryotic translation initiation factor 3, subunit 12                                                             |
| 3-monooxygenase/tryptophan 5-monooxygenase activation protein, gamma polypeptide                                   |
| elongation protein 3 homolog (S. cerevisiae)                                                                       |
| upregulated during skeletal muscle growth 5                                                                        |
| BRCA2 and CDKN1A interacting protein                                                                               |
| MAP kinase-activated protein kinase 2                                                                              |
| glutaredoxin                                                                                                       |
| RIKEN cDNA 2610009E16 gene                                                                                         |
| aspartoacylase (aminoacylase) 3                                                                                    |
| myeloid leukemia factor 2                                                                                          |
| apolipoprotein A-V                                                                                                 |
| apolipoprotein A-V                                                                                                 |
| apolipoprotein A-V                                                                                                 |
| mitochondrial ribosomal protein S34                                                                                |
| sestrin 1                                                                                                          |
| splicing factor 3b, subunit 5                                                                                      |
| solute carrier family 29 (nucleoside transporters), member 1                                                       |
| mitochondrial ribosomal protein L3                                                                                 |
| nucleolar and coiled-body phosphoprotein 1                                                                         |
| mitochondrial ribosomal protein L4                                                                                 |
| RIKEN cDNA 1200015A19 gene                                                                                         |
| aldehyde dehydrogenase 18 family, member A1                                                                        |
| LIM domain containing 2                                                                                            |
| RIKEN cDNA 2300003P22 gene                                                                                         |
| proteasome (prosome, macropain) 26S subunit, non-ATPase, 13                                                        |
| polyadenylate-binding protein-interacting protein 2                                                                |
| ATPase, H+ transporting, lysosomal V1 subunit A                                                                    |
| ATPase, H+ transporting, lysosomal V1 subunit A                                                                    |
| ---                                                                                                                |
| S100 calcium binding protein A16                                                                                   |
| arginine-rich, mutated in early stage tumors                                                                       |
| zinc finger, C3HC type 1                                                                                           |
| Shwachman-Bodian-Diamond syndrome homolog (human)                                                                  |
| barren homolog (Drosophila)                                                                                        |
| membrane-bound transcription factor peptidase, site 1                                                              |
| cold shock domain protein A                                                                                        |
| FtsJ homolog 3 (E. coli)                                                                                           |
| stearoyl-Coenzyme A desaturase 2                                                                                   |
| RIKEN cDNA 2900092E17 gene                                                                                         |
| elongation factor 1 homolog (ELF1, S. cerevisiae)                                                                  |

|                                                                                                                                                                                                                                                                                                                                                                                                                                                                                                                                                                                                                                                                                                                                                                                                 |
|-------------------------------------------------------------------------------------------------------------------------------------------------------------------------------------------------------------------------------------------------------------------------------------------------------------------------------------------------------------------------------------------------------------------------------------------------------------------------------------------------------------------------------------------------------------------------------------------------------------------------------------------------------------------------------------------------------------------------------------------------------------------------------------------------|
| similar to alcohol dehydrogenase 5 (class III), chi polypeptide                                                                                                                                                                                                                                                                                                                                                                                                                                                                                                                                                                                                                                                                                                                                 |
| defensin related cryptdin 2 /// defensin related cryptdin 3 /// defensin related cryptdin 17 /// defensin-related cryptdin 23                                                                                                                                                                                                                                                                                                                                                                                                                                                                                                                                                                                                                                                                   |
| formyl peptide receptor-like 1                                                                                                                                                                                                                                                                                                                                                                                                                                                                                                                                                                                                                                                                                                                                                                  |
| frizzled homolog 4 (Drosophila)                                                                                                                                                                                                                                                                                                                                                                                                                                                                                                                                                                                                                                                                                                                                                                 |
| frizzled homolog 4 (Drosophila)                                                                                                                                                                                                                                                                                                                                                                                                                                                                                                                                                                                                                                                                                                                                                                 |
| histocompatibility 2, D region locus 1 /// histocompatibility 2, D region /// histocompatibility 2, Q region locus 1 /// histocompatibility 2, Q region locus 7 /// histocompatibility 2, Q region locus 8 /// histocompatibility 2, Q region locus 6 /// similar to H-2 class I histocompatibility antigen, L-D alpha chain precursor /// similar to H-2 class I histocompatibility antigen, Q7 alpha chain precursor (QA-2 antigen) /// MHC c6/g2 (Qa-2) protein /// region containing histocompatibility 2, Q region locus 9; histocompatibility 2, Q region locus 7 /// similar to H-2 class I histocompatibility antigen, L-D alpha chain precursor /// similar to H-2 class I histocompatibility antigen, L-D alpha chain precursor /// similar to histocompatibility 2, Q region locus 5 |
| kallikrein 1-related peptidase b1                                                                                                                                                                                                                                                                                                                                                                                                                                                                                                                                                                                                                                                                                                                                                               |
| melanoma antigen, family B, 1 /// melanoma antigen, family B, 2 /// melanoma antigen, family B, 3                                                                                                                                                                                                                                                                                                                                                                                                                                                                                                                                                                                                                                                                                               |
| melanoma antigen, family B, 3                                                                                                                                                                                                                                                                                                                                                                                                                                                                                                                                                                                                                                                                                                                                                                   |
| melanoma antigen, family B, 1 /// melanoma antigen, family B, 2 /// melanoma antigen, family B, 3                                                                                                                                                                                                                                                                                                                                                                                                                                                                                                                                                                                                                                                                                               |
| paired-Ig-like receptor A1                                                                                                                                                                                                                                                                                                                                                                                                                                                                                                                                                                                                                                                                                                                                                                      |
| RAB7, member RAS oncogene family                                                                                                                                                                                                                                                                                                                                                                                                                                                                                                                                                                                                                                                                                                                                                                |
| regenerating islet-derived 2                                                                                                                                                                                                                                                                                                                                                                                                                                                                                                                                                                                                                                                                                                                                                                    |
| sterol carrier protein 2, liver                                                                                                                                                                                                                                                                                                                                                                                                                                                                                                                                                                                                                                                                                                                                                                 |
| splicing factor, arginine/serine-rich 2 (SC-35)                                                                                                                                                                                                                                                                                                                                                                                                                                                                                                                                                                                                                                                                                                                                                 |
| zinc finger protein 106                                                                                                                                                                                                                                                                                                                                                                                                                                                                                                                                                                                                                                                                                                                                                                         |
| small proline-rich protein 2D                                                                                                                                                                                                                                                                                                                                                                                                                                                                                                                                                                                                                                                                                                                                                                   |
| small proline-rich protein 2I                                                                                                                                                                                                                                                                                                                                                                                                                                                                                                                                                                                                                                                                                                                                                                   |
| suppressor of Ty 4 homolog 2 (S. cerevisiae)                                                                                                                                                                                                                                                                                                                                                                                                                                                                                                                                                                                                                                                                                                                                                    |
| suppressor of Ty 4 homolog 1 (S. cerevisiae) /// suppressor of Ty 4 homolog 2 (S. cerevisiae)                                                                                                                                                                                                                                                                                                                                                                                                                                                                                                                                                                                                                                                                                                   |
| vomeronasal 2, receptor, 1                                                                                                                                                                                                                                                                                                                                                                                                                                                                                                                                                                                                                                                                                                                                                                      |
| vomeronasal 2, receptor, 1 /// vomeronasal 2, receptor, 12 /// vomeronasal 2, receptor, 2 /// vomeronasal 2, receptor, 8 /// vomeronasal 2, receptor, 9                                                                                                                                                                                                                                                                                                                                                                                                                                                                                                                                                                                                                                         |
| vomeronasal 2, receptor, 4 /// vomeronasal 2, receptor, 5 /// similar to vomeronasal 2, receptor, 4                                                                                                                                                                                                                                                                                                                                                                                                                                                                                                                                                                                                                                                                                             |
| zinc finger protein, autosomal /// zinc finger protein X-linked                                                                                                                                                                                                                                                                                                                                                                                                                                                                                                                                                                                                                                                                                                                                 |
| zinc finger protein 260 /// similar to Zinc finger protein OZF (Zinc finger protein 260) (Zfp-260)                                                                                                                                                                                                                                                                                                                                                                                                                                                                                                                                                                                                                                                                                              |
| signal-regulatory protein alpha                                                                                                                                                                                                                                                                                                                                                                                                                                                                                                                                                                                                                                                                                                                                                                 |
| signal-regulatory protein alpha                                                                                                                                                                                                                                                                                                                                                                                                                                                                                                                                                                                                                                                                                                                                                                 |
| cell division cycle 2-like 1                                                                                                                                                                                                                                                                                                                                                                                                                                                                                                                                                                                                                                                                                                                                                                    |
| chymase 2, mast cell                                                                                                                                                                                                                                                                                                                                                                                                                                                                                                                                                                                                                                                                                                                                                                            |
| colony stimulating factor 3 receptor (granulocyte) /// similar to colony stimulating factor 3 receptor                                                                                                                                                                                                                                                                                                                                                                                                                                                                                                                                                                                                                                                                                          |
| colony stimulating factor 3 receptor (granulocyte) /// similar to colony stimulating factor 3 receptor                                                                                                                                                                                                                                                                                                                                                                                                                                                                                                                                                                                                                                                                                          |
| hypothetical protein LOC667653 /// hypothetical protein LOC672953                                                                                                                                                                                                                                                                                                                                                                                                                                                                                                                                                                                                                                                                                                                               |
| Transcribed locus                                                                                                                                                                                                                                                                                                                                                                                                                                                                                                                                                                                                                                                                                                                                                                               |
| ---                                                                                                                                                                                                                                                                                                                                                                                                                                                                                                                                                                                                                                                                                                                                                                                             |
| expressed sequence C76332                                                                                                                                                                                                                                                                                                                                                                                                                                                                                                                                                                                                                                                                                                                                                                       |
| mirror-image polydactyly gene 1 homolog (human)                                                                                                                                                                                                                                                                                                                                                                                                                                                                                                                                                                                                                                                                                                                                                 |
| Zinc finger, matrin-like                                                                                                                                                                                                                                                                                                                                                                                                                                                                                                                                                                                                                                                                                                                                                                        |
| RIKEN cDNA E230006M18 gene                                                                                                                                                                                                                                                                                                                                                                                                                                                                                                                                                                                                                                                                                                                                                                      |
| Transcribed locus                                                                                                                                                                                                                                                                                                                                                                                                                                                                                                                                                                                                                                                                                                                                                                               |
| DNA segment, Chr 15, ERATO Doi 55, expressed                                                                                                                                                                                                                                                                                                                                                                                                                                                                                                                                                                                                                                                                                                                                                    |
| DNA segment, Chr 2, ERATO Doi 63, expressed                                                                                                                                                                                                                                                                                                                                                                                                                                                                                                                                                                                                                                                                                                                                                     |
| ---                                                                                                                                                                                                                                                                                                                                                                                                                                                                                                                                                                                                                                                                                                                                                                                             |
| expressed sequence C77815                                                                                                                                                                                                                                                                                                                                                                                                                                                                                                                                                                                                                                                                                                                                                                       |
| ---                                                                                                                                                                                                                                                                                                                                                                                                                                                                                                                                                                                                                                                                                                                                                                                             |
| DNA segment, Chr 6, ERATO Doi 160, expressed                                                                                                                                                                                                                                                                                                                                                                                                                                                                                                                                                                                                                                                                                                                                                    |
| DNA segment, Chr 1, ERATO Doi 164, expressed                                                                                                                                                                                                                                                                                                                                                                                                                                                                                                                                                                                                                                                                                                                                                    |
| DNA segment, Chr 7, ERATO Doi 183, expressed                                                                                                                                                                                                                                                                                                                                                                                                                                                                                                                                                                                                                                                                                                                                                    |
| expressed sequence C78651                                                                                                                                                                                                                                                                                                                                                                                                                                                                                                                                                                                                                                                                                                                                                                       |
| D4, zinc and double PHD fingers, family 3                                                                                                                                                                                                                                                                                                                                                                                                                                                                                                                                                                                                                                                                                                                                                       |
| RIKEN cDNA 2610020H08 gene                                                                                                                                                                                                                                                                                                                                                                                                                                                                                                                                                                                                                                                                                                                                                                      |
| hypothetical LOC493582                                                                                                                                                                                                                                                                                                                                                                                                                                                                                                                                                                                                                                                                                                                                                                          |

|                                                                              |
|------------------------------------------------------------------------------|
| ASF1 anti-silencing function 1 homolog A (S. cerevisiae)                     |
| Limb region 1                                                                |
| helicase (DNA) B                                                             |
| Transcribed locus                                                            |
| PHD finger protein 17                                                        |
| toll-like receptor 7                                                         |
| RIKEN cDNA 1200009F10 gene                                                   |
| CREB binding protein                                                         |
| sterol O-acyltransferase 1                                                   |
| AF4/FMR2 family, member 4                                                    |
| ADP-ribosylation factor 3                                                    |
| Paired box gene 5                                                            |
| brain expressed gene 6                                                       |
| Transcribed locus                                                            |
| B lymphoid kinase                                                            |
| Fanconi anemia, complementation group M                                      |
| Rab9 effector protein with kelch motifs                                      |
| ---                                                                          |
| ATPase, Ca++-sequestering                                                    |
| cadherin 4                                                                   |
| Transcribed locus                                                            |
| expressed sequence AI465270                                                  |
| zinc finger protein 398                                                      |
| RIKEN cDNA 6430543G08 gene                                                   |
| expressed sequence AI118078                                                  |
| RIKEN cDNA 4833445I07 gene                                                   |
| Transcribed locus                                                            |
| killer cell lectin-like receptor, subfamily A, member 1                      |
| Transcribed locus                                                            |
| RNA binding motif and ELMO domain 1                                          |
| heterogeneous nuclear ribonucleoprotein A/B                                  |
| ring finger protein 2                                                        |
| RIKEN cDNA B230333C21 gene                                                   |
| death inducer-obliterator 1                                                  |
| G patch domain containing 2                                                  |
| mediator of RNA polymerase II transcription, subunit 12 homolog (yeast)-like |
| expressed sequence AA407107                                                  |
| ---                                                                          |
| cDNA sequence BC016495                                                       |
| myoneurin                                                                    |
| RIKEN cDNA 1700012B15 gene                                                   |
| expressed sequence AA517631                                                  |
| ---                                                                          |
| RIKEN cDNA 2610201A13 gene                                                   |
| nescient helix loop helix 1                                                  |
| Transcribed locus                                                            |
| Cofactor required for Sp1 transcriptional activation, subunit 2              |
| zona pellucida glycoprotein 1                                                |
| Zinc finger, CCHC domain containing 6                                        |
| DNA segment, Chr 7, ERATO Doi 187, expressed                                 |
| solute carrier family 26 (sulfate transporter), member 2                     |
| Transcribed locus                                                            |
| RIKEN cDNA 0610040J01 gene                                                   |

|                                                                    |
|--------------------------------------------------------------------|
| HECT, UBA and WWE domain containing 1                              |
| cDNA sequence BC052328                                             |
| cDNA sequence BC052328                                             |
| expressed sequence AA675344                                        |
| ---                                                                |
| DEAH (Asp-Glu-Ala-His) box polypeptide 36                          |
| PR domain containing 5                                             |
| Centaurin, delta 1                                                 |
| ---                                                                |
| Grainyhead-like 2 (Drosophila)                                     |
| DNA segment, Chr X, ERATO Doi 11, expressed                        |
| ---                                                                |
| C-type lectin domain family 4, member d                            |
| WNK lysine deficient protein kinase 2                              |
| DNA segment, Chr 12, ERATO Doi 123, expressed                      |
| DNA segment, Chr 7, ERATO Doi 143, expressed                       |
| Protein phosphatase 2, regulatory subunit B (B56), epsilon isoform |
| expressed sequence C77068                                          |
| SET domain, bifurcated 1                                           |
| expressed sequence C76977                                          |
| ---                                                                |
| DNA segment, Chr 4, ERATO Doi 117, expressed                       |
| neurobeachin-like 2                                                |
| SH2 domain binding protein 1 (tetratricopeptide repeat containing) |
| expressed sequence C77370                                          |
| ubiquitin associated protein 2-like                                |
| expressed sequence C77545                                          |
| expressed sequence C77609                                          |
| expressed sequence C77681                                          |
| expressed sequence C77691                                          |
| expressed sequence C77874                                          |
| expressed sequence C78282                                          |
| expressed sequence C78444                                          |
| expressed sequence C78878                                          |
| guanylate nucleotide binding protein 1                             |
| RIKEN cDNA A930012N16 gene                                         |
| fibroblast growth factor 10                                        |
| DNA segment, Chr 2, ERATO Doi 239, expressed                       |
| ATPase type 13A3                                                   |
| ---                                                                |
| sorting nexin family member 27                                     |
| expressed sequence C79329                                          |
| RIKEN cDNA C920021L13 gene                                         |
| ---                                                                |
| expressed sequence C79468                                          |
| bromodomain and WD repeat domain containing 3                      |
| SCO-spondin                                                        |
| ---                                                                |
| Transcribed locus                                                  |
| expressed sequence C79777                                          |
| ---                                                                |
| ---                                                                |
| expressed sequence C79741                                          |

|                                                                                                                                                                                                            |
|------------------------------------------------------------------------------------------------------------------------------------------------------------------------------------------------------------|
| expressed sequence C80012                                                                                                                                                                                  |
| Fibroblast growth factor receptor 2                                                                                                                                                                        |
| expressed sequence C80256                                                                                                                                                                                  |
| ---                                                                                                                                                                                                        |
| ---                                                                                                                                                                                                        |
| ---                                                                                                                                                                                                        |
| ATPase, H+ transporting, lysosomal V0 subunit A1                                                                                                                                                           |
| NudC domain containing 3                                                                                                                                                                                   |
| vacuolar protein sorting 24 (yeast)                                                                                                                                                                        |
| metastasis-associated gene family, member 2                                                                                                                                                                |
| sorcin                                                                                                                                                                                                     |
| signal sequence receptor, gamma                                                                                                                                                                            |
| defender against cell death 1                                                                                                                                                                              |
| pancreatitis-associated protein                                                                                                                                                                            |
| karyopherin (importin) alpha 3                                                                                                                                                                             |
| matrin 3                                                                                                                                                                                                   |
| matrin 3                                                                                                                                                                                                   |
| matrin 3                                                                                                                                                                                                   |
| DNA segment, Chr 4, ERATO Doi 196, expressed                                                                                                                                                               |
| RIKEN cDNA 2700094K13 gene                                                                                                                                                                                 |
| RIKEN cDNA 0610006I08 gene                                                                                                                                                                                 |
| zinc finger, DHHC domain containing 5                                                                                                                                                                      |
| synaptophysin-like protein                                                                                                                                                                                 |
| complement component 1, q subcomponent, beta polypeptide                                                                                                                                                   |
| HESB like domain containing 1                                                                                                                                                                              |
| Vac14 homolog (S. cerevisiae)                                                                                                                                                                              |
| S-adenosylhomocysteine hydrolase                                                                                                                                                                           |
| S-adenosylhomocysteine hydrolase                                                                                                                                                                           |
| S-adenosylhomocysteine hydrolase                                                                                                                                                                           |
| splicing factor 3a, subunit 1                                                                                                                                                                              |
| brain protein 44-like                                                                                                                                                                                      |
| splicing factor 3a, subunit 3                                                                                                                                                                              |
| casein alpha                                                                                                                                                                                               |
| F-box and leucine-rich repeat protein 5                                                                                                                                                                    |
| ATP synthase, H+ transporting, mitochondrial F0 complex, subunit c (subunit 9), isoform 1                                                                                                                  |
| syndecan 1                                                                                                                                                                                                 |
| branched chain ketoacid dehydrogenase E1, alpha polypeptide                                                                                                                                                |
| Fission 1 (mitochondrial outer membrane) homolog (yeast)                                                                                                                                                   |
| brain protein I3                                                                                                                                                                                           |
| ribonuclease, RNase A family 4                                                                                                                                                                             |
| similar to Putative RNA-binding protein 3 (RNA-binding motif protein 3)                                                                                                                                    |
| superoxide dismutase 2, mitochondrial                                                                                                                                                                      |
| phosphatidic acid phosphatase 2a                                                                                                                                                                           |
| Bcl2-like 10                                                                                                                                                                                               |
| RIKEN cDNA 2010321M09 gene                                                                                                                                                                                 |
| histone deacetylase 1                                                                                                                                                                                      |
| retinol binding protein 4, plasma                                                                                                                                                                          |
| heat-responsive protein 12                                                                                                                                                                                 |
| biglycan                                                                                                                                                                                                   |
| SWI/SNF related, matrix associated, actin dependent regulator of chromatin, subfamily b, member 1                                                                                                          |
| guanylate cyclase activator 2a (guanylin)                                                                                                                                                                  |
| acid phosphatase 1, soluble /// similar to acid phosphatase 1, soluble /// similar to acid phosphatase 1 isoform b /// similar to acid phosphatase 1 isoform b /// similar to acid phosphatase 1 isoform b |
| acid phosphatase 1, soluble /// similar to acid phosphatase 1, soluble /// similar to acid phosphatase 1, soluble /// similar to acid phosphatase 1, soluble                                               |

|                                                                                                                                                              |
|--------------------------------------------------------------------------------------------------------------------------------------------------------------|
| acid phosphatase 1, soluble /// similar to acid phosphatase 1, soluble /// similar to acid phosphatase 1, soluble /// similar to acid phosphatase 1, soluble |
| cholecystokinin                                                                                                                                              |
| ras homolog gene family, member C                                                                                                                            |
| aldehyde dehydrogenase 2, mitochondrial                                                                                                                      |
| aldehyde dehydrogenase 2, mitochondrial                                                                                                                      |
| mitochondrial ribosomal protein L48                                                                                                                          |
| serine (or cysteine) peptidase inhibitor, clade B, member 6a                                                                                                 |
| ubiquitin specific peptidase 14                                                                                                                              |
| X-ray repair complementing defective repair in Chinese hamster cells 5                                                                                       |
| regenerating islet-derived 3 gamma                                                                                                                           |
| latexin                                                                                                                                                      |
| pyruvate kinase, muscle                                                                                                                                      |
| IMP1 inner mitochondrial membrane peptidase-like (S. cerevisiae)                                                                                             |
| aldo-keto reductase family 7, member A5 (aflatoxin aldehyde reductase)                                                                                       |
| profilin 1 /// similar to profilin 1 /// similar to profilin 1                                                                                               |
| ribosomal protein S25                                                                                                                                        |
| lactate dehydrogenase A                                                                                                                                      |
| D4, zinc and double PHD fingers family 2                                                                                                                     |
| apolipoprotein F                                                                                                                                             |
| WD repeat domain 1                                                                                                                                           |
| syntaxin 5A                                                                                                                                                  |
| solute carrier family 17 (sodium phosphate), member 1                                                                                                        |
| solute carrier family 17 (sodium phosphate), member 1                                                                                                        |
| RIKEN cDNA 0610010K06 gene                                                                                                                                   |
| thymidine kinase 1                                                                                                                                           |
| mitochondrial ribosomal protein L30                                                                                                                          |
| heterogeneous nuclear ribonucleoprotein D-like                                                                                                               |
| heterogeneous nuclear ribonucleoprotein D-like                                                                                                               |
| glutathione S-transferase, alpha 4                                                                                                                           |
| RIKEN cDNA 1110031B06 gene                                                                                                                                   |
| mannoside acetylglucosaminyltransferase 1                                                                                                                    |
| N-myc downstream regulated gene 2                                                                                                                            |
| RIKEN cDNA 4931406C07 gene                                                                                                                                   |
| RIKEN cDNA 4931406C07 gene                                                                                                                                   |
| RIKEN cDNA 4931406C07 gene                                                                                                                                   |
| haptoglobin                                                                                                                                                  |
| RIKEN cDNA 0610007P14 gene                                                                                                                                   |
| apolipoprotein A-I                                                                                                                                           |
| hydroxysteroid dehydrogenase like 2                                                                                                                          |
| hydroxysteroid dehydrogenase like 2                                                                                                                          |
| chromatin modifying protein 6                                                                                                                                |
| mitochondrial ribosomal protein L36                                                                                                                          |
| casein kinase II, beta subunit                                                                                                                               |
| serine protease inhibitor, Kunitz type 2                                                                                                                     |
| RAD23b homolog (S. cerevisiae)                                                                                                                               |
| RAD23b homolog (S. cerevisiae)                                                                                                                               |
| RIKEN cDNA 3732413I11 gene                                                                                                                                   |
| ribonuclease H2, large subunit                                                                                                                               |
| Kruppel-like factor 2 (lung)                                                                                                                                 |
| carbonyl reductase 1                                                                                                                                         |
| electron transferring flavoprotein, alpha polypeptide                                                                                                        |
| DNA segment, Chr 18, Wayne State University 98, expressed                                                                                                    |
| protein phosphatase 1, regulatory (inhibitor) subunit 1A                                                                                                     |

|                                                                                                                                                              |
|--------------------------------------------------------------------------------------------------------------------------------------------------------------|
| receptor accessory protein 5                                                                                                                                 |
| Histocompatibility 13                                                                                                                                        |
| histocompatibility 13                                                                                                                                        |
| Angiopoietin-like 4                                                                                                                                          |
| angiopoietin-like 4                                                                                                                                          |
| DnaJ (Hsp40) homolog, subfamily B, member 6                                                                                                                  |
| integrator complex subunit 5                                                                                                                                 |
| RIKEN cDNA 2310016A09 gene                                                                                                                                   |
| lipopolysaccharide binding protein                                                                                                                           |
| trafficking protein, kinesin binding 1                                                                                                                       |
| Fas death domain-associated protein                                                                                                                          |
| sphingosine phosphate lyase 1                                                                                                                                |
| sphingosine phosphate lyase 1                                                                                                                                |
| PCTAIRE-motif protein kinase 3                                                                                                                               |
| STE20-like kinase (yeast)                                                                                                                                    |
| TBC1 domain family, member 10a                                                                                                                               |
| adenomatosis polyposis coli down-regulated 1                                                                                                                 |
| receptor accessory protein 6                                                                                                                                 |
| RIKEN cDNA 3110003A17 gene                                                                                                                                   |
| exosome component 10                                                                                                                                         |
| methionine-tRNA synthetase                                                                                                                                   |
| glucosidase 1                                                                                                                                                |
| pericentriolar material 1                                                                                                                                    |
| erythrocyte protein band 4.1-like 4b                                                                                                                         |
| inhibitor of DNA binding 4                                                                                                                                   |
| phosphatidylinositol glycan, class T                                                                                                                         |
| B-cell translocation gene 3 /// similar to BTG3 protein (Tob5 protein) (Abundant in neuroepithelium area protein) /// B-cell translocation gene 3 pseudogene |
| v-maf musculoaponeurotic fibrosarcoma oncogene family, protein G (avian)                                                                                     |
| SUMO/sentrin specific peptidase 6                                                                                                                            |
| molybdenum cofactor sulfurase                                                                                                                                |
| NMDA receptor-regulated gene 1                                                                                                                               |
| neutrophilic granule protein                                                                                                                                 |
| renin binding protein                                                                                                                                        |
| CDK5 regulatory subunit associated protein 3                                                                                                                 |
| RIKEN cDNA 1110008H02 gene                                                                                                                                   |
| zinc finger protein 91                                                                                                                                       |
| cDNA sequence BC017133                                                                                                                                       |
| solute carrier family 6 (neurotransmitter transporter, glycine), member 9                                                                                    |
| F-box protein 15                                                                                                                                             |
| similar to U2AF homology motif (UHM) kinase 1                                                                                                                |
| testis expressed gene 261                                                                                                                                    |
| Bcl2-associated athanogene 3                                                                                                                                 |
| kinesin family member 23                                                                                                                                     |
| CDNA clone IMAGE:30031514                                                                                                                                    |
| deformed epidermal autoregulatory factor 1 (Drosophila)                                                                                                      |
| GTPase, IMAP family member 4                                                                                                                                 |
| nuclear pore membrane protein 121                                                                                                                            |
| ariadne homolog 2 (Drosophila)                                                                                                                               |
| MMS19 (MET18 S. cerevisiae)-like                                                                                                                             |
| MYST histone acetyltransferase 2                                                                                                                             |
| ---                                                                                                                                                          |
| forkhead box P1                                                                                                                                              |
| arginyl aminopeptidase (aminopeptidase B)-like 1                                                                                                             |



|                                                                                        |
|----------------------------------------------------------------------------------------|
| adaptor-related protein complex 3, delta 1 subunit                                     |
| low-density lipoprotein receptor-related protein 10                                    |
| plakophilin 4                                                                          |
| adenosine deaminase, RNA-specific                                                      |
| zinc finger, CCHC domain containing 10                                                 |
| ADP-ribosylation factor guanine nucleotide-exchange factor 1(brefeldin A-inhibited)    |
| trans-acting transcription factor 3                                                    |
| dystrophia myotonica-containing WD repeat motif                                        |
| embryonal Fyn-associated substrate                                                     |
| RIKEN cDNA 5730589K01 gene                                                             |
| RIKEN cDNA 5730589K01 gene                                                             |
| protein kinase C, zeta                                                                 |
| X-linked myotubular myopathy gene 1                                                    |
| cell division cycle associated 4                                                       |
| G protein-coupled receptor 172B                                                        |
| solute carrier family 1 (glial high affinity glutamate transporter), member 2          |
| calmodulin-like 4                                                                      |
| SH3-binding domain glutamic acid-rich protein                                          |
| SH3-binding domain glutamic acid-rich protein                                          |
| pleckstrin homology-like domain, family B, member 1                                    |
| RNA binding motif, single stranded interacting protein 1                               |
| glucocorticoid receptor DNA binding factor 1                                           |
| RIKEN cDNA 2310004I03 gene                                                             |
| RIKEN cDNA 2310061I04 gene                                                             |
| ---                                                                                    |
| ---                                                                                    |
| ORM1-like 1 (S. cerevisiae)                                                            |
| polymerase (DNA directed), beta                                                        |
| farnesyltransferase, CAAX box, beta                                                    |
| stromal membrane-associated protein 1-like                                             |
| ligase III, DNA, ATP-dependent                                                         |
| Traf3 interacting protein 2                                                            |
| cDNA sequence BC003993                                                                 |
| decapping enzyme                                                                       |
| beta-transducin repeat containing protein                                              |
| 5'-nucleotidase, cytosolic III-like                                                    |
| serine (or cysteine) peptidase inhibitor, clade A, member 6                            |
| cytochrome P450, family 11, subfamily a, polypeptide 1                                 |
| C-reactive protein, pentraxin-related                                                  |
| centrobin, centrosomal BRCA2 interacting protein                                       |
| biphenyl hydrolase-like (serine hydrolase, breast epithelial mucin-associated antigen) |
| cullin 2                                                                               |
| cleavage and polyadenylation specificity factor 3                                      |
| CDC16 cell division cycle 16 homolog (S. cerevisiae)                                   |
| cDNA sequence BC054059                                                                 |
| ---                                                                                    |
| vaccinia related kinase 3                                                              |
| transmembrane protein 106C                                                             |
| DNA segment, Chr 10, Brigham & Women's Genetics 1364 expressed                         |
| DNA segment, Chr 10, Brigham & Women's Genetics 1364 expressed                         |
| aldehyde dehydrogenase 9, subfamily A1                                                 |
| ubiquitin carboxy-terminal hydrolase L1                                                |
| DEAD (Asp-Glu-Ala-Asp) box polypeptide 56                                              |

|                                                                                                                                                                                                                                          |
|------------------------------------------------------------------------------------------------------------------------------------------------------------------------------------------------------------------------------------------|
| selenoprotein                                                                                                                                                                                                                            |
| programmed cell death 6 interacting protein                                                                                                                                                                                              |
| DnaJ (Hsp40) homolog, subfamily B, member 1                                                                                                                                                                                              |
| BCL2/adenovirus E1B interacting protein 3-like                                                                                                                                                                                           |
| peroxiredoxin 3                                                                                                                                                                                                                          |
| heterochromatin protein 1, binding protein 3                                                                                                                                                                                             |
| microsomal glutathione S-transferase 3                                                                                                                                                                                                   |
| aminopeptidase puromycin sensitive                                                                                                                                                                                                       |
| expressed sequence AL033314                                                                                                                                                                                                              |
| RIKEN cDNA 2310028O11 gene                                                                                                                                                                                                               |
| RAB5C, member RAS oncogene family                                                                                                                                                                                                        |
| radial spokehead-like 2                                                                                                                                                                                                                  |
| Wdr45 like                                                                                                                                                                                                                               |
| heterogeneous nuclear ribonucleoprotein M                                                                                                                                                                                                |
| NADH dehydrogenase (ubiquinone) flavoprotein 1                                                                                                                                                                                           |
| succinate-CoA ligase, GDP-forming, alpha subunit                                                                                                                                                                                         |
| isopentenyl-diphosphate delta isomerase                                                                                                                                                                                                  |
| DNA segment, Chr 11, Brigham & Women's Genetics 0434 expressed                                                                                                                                                                           |
| transmembrane protein 123                                                                                                                                                                                                                |
| protein tyrosine phosphatase, receptor type, F                                                                                                                                                                                           |
| neurogranin                                                                                                                                                                                                                              |
| transmembrane 9 superfamily member 3                                                                                                                                                                                                     |
| transmembrane 9 superfamily member 3                                                                                                                                                                                                     |
| Actin related protein 2/3 complex, subunit 5                                                                                                                                                                                             |
| proline rich 13                                                                                                                                                                                                                          |
| NADH dehydrogenase (ubiquinone) 1 alpha subcomplex, 2                                                                                                                                                                                    |
| ATPase, H+ transporting, lysosomal V1 subunit G1                                                                                                                                                                                         |
| integral membrane protein 2C                                                                                                                                                                                                             |
| casein kinase 1, gamma 2                                                                                                                                                                                                                 |
| myeloid-associated differentiation marker                                                                                                                                                                                                |
| ubiquitin-associated protein 1                                                                                                                                                                                                           |
| deoxyuridine triphosphatase                                                                                                                                                                                                              |
| RIKEN cDNA 1190002C06 gene                                                                                                                                                                                                               |
| stomatin (Epb7.2)-like 2                                                                                                                                                                                                                 |
| ribosomal protein L21                                                                                                                                                                                                                    |
| NADH dehydrogenase (ubiquinone) Fe-S protein 6 /// similar to NADH dehydrogenase (ubiquinone) Fe-S protein 6 /// similar to NADH dehydrogenase (ubiquinone) Fe-S protein 6 /// similar to NADH dehydrogenase (ubiquinone) Fe-S protein 6 |
| NADH dehydrogenase (ubiquinone) Fe-S protein 6 /// similar to NADH dehydrogenase (ubiquinone) Fe-S protein 6                                                                                                                             |
| RIKEN cDNA 2410015N17 gene                                                                                                                                                                                                               |
| RIKEN cDNA 2410015N17 gene                                                                                                                                                                                                               |
| phosphoserine aminotransferase 1                                                                                                                                                                                                         |
| mitochondrial ribosomal protein L15                                                                                                                                                                                                      |
| EBNA1 binding protein 2                                                                                                                                                                                                                  |
| dynein light chain LC8-type 1                                                                                                                                                                                                            |
| Transcribed locus, strongly similar to XP_580165.1 PREDICTED: hypothetical protein XP_580165 [Rattus norvegicus]                                                                                                                         |
| ribosomal protein S27                                                                                                                                                                                                                    |
| ribosomal protein S27                                                                                                                                                                                                                    |
| Splicing factor, arginine/serine-rich 7                                                                                                                                                                                                  |
| BUD31 homolog (yeast)                                                                                                                                                                                                                    |
| polymerase (RNA) II (DNA directed) polypeptide I                                                                                                                                                                                         |
| RIKEN cDNA 1100001I22 gene                                                                                                                                                                                                               |
| RIKEN cDNA 1100001I22 gene                                                                                                                                                                                                               |
| RIKEN cDNA 1100001I22 gene                                                                                                                                                                                                               |
| myelin basic protein                                                                                                                                                                                                                     |

|                                                                                                                                                                                                                                                                                                                                                                                                                                                       |
|-------------------------------------------------------------------------------------------------------------------------------------------------------------------------------------------------------------------------------------------------------------------------------------------------------------------------------------------------------------------------------------------------------------------------------------------------------|
| myelin basic protein                                                                                                                                                                                                                                                                                                                                                                                                                                  |
| RAS protein-specific guanine nucleotide-releasing factor 1                                                                                                                                                                                                                                                                                                                                                                                            |
| SMT3 suppressor of mif two 3 homolog 2 (yeast) /// similar to SMT3 suppressor of mif two 3 homolog 2 /// similar to small ubiquitin-like modifier 2 isoform b precursor /// similar to SMT3 suppressor of mif two 3 homolog 2 /// similar to SMT3 suppressor of mif two 3 homolog 2 /// similar to SMT3 suppressor of mif two 3 homolog 2 /// similar to SMT3 suppressor of mif two 3 homolog 2 /// similar to SMT3 suppressor of mif two 3 homolog 2 |
| DNA segment, Chr 17, Wayne State University 104, expressed                                                                                                                                                                                                                                                                                                                                                                                            |
| cell division cycle 20 homolog (S. cerevisiae)                                                                                                                                                                                                                                                                                                                                                                                                        |
| RIKEN cDNA 2310044H10 gene                                                                                                                                                                                                                                                                                                                                                                                                                            |
| NADH dehydrogenase (ubiquinone) 1 alpha subcomplex, 9                                                                                                                                                                                                                                                                                                                                                                                                 |
| endothelial differentiation-related factor 1                                                                                                                                                                                                                                                                                                                                                                                                          |
| lysyl-tRNA synthetase /// similar to lysyl-tRNA synthetase                                                                                                                                                                                                                                                                                                                                                                                            |
| RIKEN cDNA 2510039O18 gene                                                                                                                                                                                                                                                                                                                                                                                                                            |
| tyrosine aminotransferase                                                                                                                                                                                                                                                                                                                                                                                                                             |
| zinc finger protein 306                                                                                                                                                                                                                                                                                                                                                                                                                               |
| RIKEN cDNA 2410104I19 gene                                                                                                                                                                                                                                                                                                                                                                                                                            |
| sorting nexin 2                                                                                                                                                                                                                                                                                                                                                                                                                                       |
| sorting nexin 2                                                                                                                                                                                                                                                                                                                                                                                                                                       |
| sorting nexin 2                                                                                                                                                                                                                                                                                                                                                                                                                                       |
| RIKEN cDNA C730004C24 gene                                                                                                                                                                                                                                                                                                                                                                                                                            |
| mitochondrial ribosomal protein L38                                                                                                                                                                                                                                                                                                                                                                                                                   |
| glycine amidinotransferase (L-arginine:glycine amidinotransferase)                                                                                                                                                                                                                                                                                                                                                                                    |
| glycoprotein Ib, beta polypeptide /// septin 5                                                                                                                                                                                                                                                                                                                                                                                                        |
| EGL nine homolog 2 (C. elegans)                                                                                                                                                                                                                                                                                                                                                                                                                       |
| Transcribed locus                                                                                                                                                                                                                                                                                                                                                                                                                                     |
| transmembrane protein 50B                                                                                                                                                                                                                                                                                                                                                                                                                             |
| SYF2 homolog, RNA splicing factor (S. cerevisiae)                                                                                                                                                                                                                                                                                                                                                                                                     |
| HSPC171 protein                                                                                                                                                                                                                                                                                                                                                                                                                                       |
| actinin alpha 4                                                                                                                                                                                                                                                                                                                                                                                                                                       |
| enolase 3, beta muscle                                                                                                                                                                                                                                                                                                                                                                                                                                |
| ERGIC and golgi 3                                                                                                                                                                                                                                                                                                                                                                                                                                     |
| cysteine dioxygenase 1, cytosolic                                                                                                                                                                                                                                                                                                                                                                                                                     |
| reticulocalbin 3, EF-hand calcium binding domain                                                                                                                                                                                                                                                                                                                                                                                                      |
| patatin-like phospholipase domain containing 2                                                                                                                                                                                                                                                                                                                                                                                                        |
| basic transcription factor 3-like 4                                                                                                                                                                                                                                                                                                                                                                                                                   |
| RIKEN cDNA 2400001E08 gene                                                                                                                                                                                                                                                                                                                                                                                                                            |
| transmembrane protein 14C                                                                                                                                                                                                                                                                                                                                                                                                                             |
| muscleblind-like 1 (Drosophila)                                                                                                                                                                                                                                                                                                                                                                                                                       |
| DNA segment, Chr 10, ERATO Doi 322, expressed /// similar to mitochondrial ribosomal protein L42 /// similar to mitochondrial ribosomal protein L42 /// hypothetical protein LOC670566 /// hypothetical protein LOC675006                                                                                                                                                                                                                             |
| Actin related protein 2/3 complex, subunit 1B                                                                                                                                                                                                                                                                                                                                                                                                         |
| actin related protein 2/3 complex, subunit 1B /// similar to Actin-related protein 2/3 complex subunit 1B (ARP2/3 complex 41 kDa subunit) (p41-ARC) /// similar to Actin-related protein 2/3 complex subunit 1B (ARP2/3 complex 41 kDa subunit) (p41-ARC)                                                                                                                                                                                             |
| ribosomal protein S23                                                                                                                                                                                                                                                                                                                                                                                                                                 |
| high density lipoprotein (HDL) binding protein                                                                                                                                                                                                                                                                                                                                                                                                        |
| Rho GDP dissociation inhibitor (GDI) alpha                                                                                                                                                                                                                                                                                                                                                                                                            |
| solute carrier organic anion transporter family, member 6c1                                                                                                                                                                                                                                                                                                                                                                                           |
| Ubiquitin protein ligase E3 component n-recognin 2                                                                                                                                                                                                                                                                                                                                                                                                    |
| Ubiquitin-conjugating enzyme E2H                                                                                                                                                                                                                                                                                                                                                                                                                      |
| expressed sequence C80171                                                                                                                                                                                                                                                                                                                                                                                                                             |
| DNA segment, Chr 9, ERATO Doi 306, expressed                                                                                                                                                                                                                                                                                                                                                                                                          |
| RIKEN cDNA 1700016D02 gene /// hypothetical protein LOC666415 /// hypothetical protein LOC666699 /// hypothetical protein LOC676410                                                                                                                                                                                                                                                                                                                   |
| expressed sequence C80678                                                                                                                                                                                                                                                                                                                                                                                                                             |
| expressed sequence C80719                                                                                                                                                                                                                                                                                                                                                                                                                             |
| Ubiquitin specific peptidase 53                                                                                                                                                                                                                                                                                                                                                                                                                       |
| Transcribed locus, moderately similar to XP_574723.1 PREDICTED: similar to LRRGT00097 [Rattus norvegicus]                                                                                                                                                                                                                                                                                                                                             |

|                                                                                                                                                                                                                                                              |
|--------------------------------------------------------------------------------------------------------------------------------------------------------------------------------------------------------------------------------------------------------------|
| DNA segment, Chr 4, ERATO Doi 335, expressed                                                                                                                                                                                                                 |
| Transcribed locus                                                                                                                                                                                                                                            |
| DNA segment, Chr 2, ERATO Doi 357, expressed                                                                                                                                                                                                                 |
| ---                                                                                                                                                                                                                                                          |
| ---                                                                                                                                                                                                                                                          |
| A kinase (PRKA) anchor protein 7                                                                                                                                                                                                                             |
| non-selective cation channel 1                                                                                                                                                                                                                               |
| histone 1, H3g /// histone 1, H3f /// histone1, H3d /// histone 1, H3e /// histone 1, H3h /// histone 1, H3i                                                                                                                                                 |
| homeo box B8                                                                                                                                                                                                                                                 |
| ---                                                                                                                                                                                                                                                          |
| interferon alpha family, gene 1 /// interferon alpha family, gene 11 /// interferon alpha family, gene 5 /// interferon alpha family, gene 6 /// interferon alpha family, gene 7 /// interferon alpha family, gene 9 /// interferon alpha family, gene B /// |
| interferon alpha 8/6 precursor; IFNa8/6                                                                                                                                                                                                                      |
| inositol 1,4,5-triphosphate receptor 2                                                                                                                                                                                                                       |
| sulfotransferase family, cytosolic, 1C, member 1                                                                                                                                                                                                             |
| NK2 transcription factor related, locus 9 (Drosophila)                                                                                                                                                                                                       |
| aristaless 3                                                                                                                                                                                                                                                 |
| ---                                                                                                                                                                                                                                                          |
| thymosin, beta 4, X chromosome                                                                                                                                                                                                                               |
| DNA segment, Chr 1, ERATO Doi 83, expressed                                                                                                                                                                                                                  |
| ubiquitin specific peptidase 29                                                                                                                                                                                                                              |
| transcription termination factor 1                                                                                                                                                                                                                           |
| plexin B2                                                                                                                                                                                                                                                    |
| zinc finger protein 161                                                                                                                                                                                                                                      |
| expressed sequence C80638                                                                                                                                                                                                                                    |
| ---                                                                                                                                                                                                                                                          |
| expressed sequence C80113                                                                                                                                                                                                                                    |
| expressed sequence C80060                                                                                                                                                                                                                                    |
| Transcribed locus                                                                                                                                                                                                                                            |
| Syntrophin, basic 1                                                                                                                                                                                                                                          |
| expressed sequence C81072                                                                                                                                                                                                                                    |
| ---                                                                                                                                                                                                                                                          |
| STT3, subunit of the oligosaccharyltransferase complex, homolog A (S. cerevisiae)                                                                                                                                                                            |
| rhomboid, veinlet-like 3 (Drosophila)                                                                                                                                                                                                                        |
| zinc finger, FYVE domain containing 16                                                                                                                                                                                                                       |
| gene model 1683, (NCBI)                                                                                                                                                                                                                                      |
| NIMA (never in mitosis gene a)-related expressed kinase 9                                                                                                                                                                                                    |
| kelch-like 24 (Drosophila)                                                                                                                                                                                                                                   |
| myelin transcription factor 1-like                                                                                                                                                                                                                           |
| myelin transcription factor 1-like                                                                                                                                                                                                                           |
| myelin transcription factor 1-like                                                                                                                                                                                                                           |
| disrupted meiotic cDNA 1 homolog                                                                                                                                                                                                                             |
| expressed sequence AI594671                                                                                                                                                                                                                                  |
| GATA binding protein 5                                                                                                                                                                                                                                       |
| expressed sequence AI194738                                                                                                                                                                                                                                  |
| phosphate regulating gene with homologies to endopeptidases on the X chromosome (hypophosphatemia, vitamin D resistant rickets)                                                                                                                              |
| keratin complex 2, basic, gene 16                                                                                                                                                                                                                            |
| paired box gene 8                                                                                                                                                                                                                                            |
| metastasis associated gene 2                                                                                                                                                                                                                                 |
| anaplastic lymphoma kinase                                                                                                                                                                                                                                   |
| even skipped homeotic gene 2 homolog                                                                                                                                                                                                                         |
| nuclear receptor coactivator 2                                                                                                                                                                                                                               |
| membrane-spanning 4-domains, subfamily A, member 2                                                                                                                                                                                                           |
| angiopoietin 1                                                                                                                                                                                                                                               |
| vav 1 oncogene                                                                                                                                                                                                                                               |

|                                                                                                                                  |
|----------------------------------------------------------------------------------------------------------------------------------|
| formin-like 3                                                                                                                    |
| expressed sequence AI451896                                                                                                      |
| estrogen receptor 2 (beta)                                                                                                       |
| interleukin 4 induced 1                                                                                                          |
| SLIT-ROBO Rho GTPase activating protein 2                                                                                        |
| hyaluronic acid binding protein 2                                                                                                |
| WW, C2 and coiled-coil domain containing 1                                                                                       |
| pyridoxal (pyridoxine, vitamin B6) kinase                                                                                        |
| DNA segment, Chr 9, ERATO Doi 720, expressed                                                                                     |
| Moloney sarcoma oncogene                                                                                                         |
| calmodulin 1                                                                                                                     |
| engrailed 1                                                                                                                      |
| cerebellar degeneration-related protein 2-like                                                                                   |
| interleukin 10 receptor, alpha                                                                                                   |
| RIKEN cDNA D030029J20 gene                                                                                                       |
| ---                                                                                                                              |
| ADP-ribosylation factor-like 4A                                                                                                  |
| AP1 gamma subunit binding protein 1                                                                                              |
| Transcribed locus                                                                                                                |
| transducin (beta)-like 3                                                                                                         |
| DEAD (Asp-Glu-Ala-Asp) box polypeptide 50                                                                                        |
| ---                                                                                                                              |
| very low density lipoprotein receptor                                                                                            |
| zinc finger protein 499                                                                                                          |
| ---                                                                                                                              |
| secreted Ly6/Plaur domain containing 1                                                                                           |
| centaurin, beta 1                                                                                                                |
| Serpine1 mRNA binding protein 1                                                                                                  |
| ---                                                                                                                              |
| expressed sequence AA408420                                                                                                      |
| surfeit gene 4                                                                                                                   |
| 0 day neonate thymus cDNA, RIKEN full-length enriched library, clone:A430079C03 product:unclassifiable, full insert sequence     |
| expressed sequence AA672641                                                                                                      |
| PCI domain containing 2                                                                                                          |
| PCI domain containing 2                                                                                                          |
| Tropomodulin 1                                                                                                                   |
| beta-1,4-N-acetyl-galactosaminyl transferase 2                                                                                   |
| cholinergic receptor, nicotinic, delta polypeptide                                                                               |
| C1GALT1-specific chaperone 1                                                                                                     |
| C-type lectin domain family 4, member e                                                                                          |
| WD repeat domain 75                                                                                                              |
| G-protein coupled receptor 65                                                                                                    |
| TAF15 RNA polymerase II, TATA box binding protein (TBP)-associated factor                                                        |
| ---                                                                                                                              |
| kalirin, RhoGEF kinase                                                                                                           |
| patched homolog 2                                                                                                                |
| mutY homolog (E. coli)                                                                                                           |
| Expressed sequence AA536717                                                                                                      |
| myosin VI                                                                                                                        |
| nuclear factor of activated T-cells, cytoplasmic, calcineurin-dependent 2 interacting protein                                    |
| solute carrier family 11 (proton-coupled divalent metal ion transporters), member 1                                              |
| ubiquitin specific peptidase 24                                                                                                  |
| heat shock protein 8 /// similar to heat shock protein 8 /// similar to heat shock protein 8 /// similar to heat shock protein 8 |

|                                                                                            |
|--------------------------------------------------------------------------------------------|
| Nuclear VCP-like                                                                           |
| transglutaminase 3, E polypeptide                                                          |
| rhodopsin                                                                                  |
| contactin 3                                                                                |
| fidgetin-like 1                                                                            |
| Vcell division cycle 73, Paf1/RNA polymerase II complex component, homolog (S. cerevisiae) |
| protein kinase C, zeta                                                                     |
| 5-azacytidine induced gene 2                                                               |
| actin, gamma, cytoplasmic 1                                                                |
| interleukin 9                                                                              |
| ribosomal protein L8                                                                       |
| Phosphoglycerate dehydrogenase like 1                                                      |
| ubiquitin associated protein 2-like                                                        |
| ubiquitin associated protein 2-like                                                        |
| spindle assembly 6 homolog (C. elegans)                                                    |
| pre B-cell leukemia transcription factor 3                                                 |
| neural cell adhesion molecule 2                                                            |
| neural cell adhesion molecule 2                                                            |
| kinesin family member 5A /// kinesin family member 5C                                      |
| 2-cell-stage, variable group, member 3                                                     |
| arginine vasopressin receptor 2                                                            |
| crystallin, gamma C                                                                        |
| ADP-ribosylation factor 3                                                                  |
| prostaglandin E receptor 3 (subtype EP3)                                                   |
| prostaglandin E receptor 3 (subtype EP3)                                                   |
| zinc finger, A20 domain containing 1                                                       |
| reelin                                                                                     |
| phosphatidylinositol 3-kinase, regulatory subunit, polypeptide 1 (p85 alpha)               |
| ELK1, member of ETS oncogene family                                                        |
| ---                                                                                        |
| paired box gene 1                                                                          |
| N-myc downstream regulated gene 1 /// N-myc downstream regulated-like                      |
| plasmacytoma expressed transcript 2                                                        |
| cyclin J                                                                                   |
| RIKEN cDNA C330016K18 gene                                                                 |
| Rho GTPase activating protein 29                                                           |
| quiescin Q6                                                                                |
| quiescin Q6                                                                                |
| quiescin Q6                                                                                |
| dihydrouridine synthase 1-like (S. cerevisiae)                                             |
| RIKEN cDNA 0610011I04 gene                                                                 |
| RIKEN cDNA 1500003O03 gene                                                                 |
| RIKEN cDNA 1500003O03 gene                                                                 |
| phytanoyl-CoA hydroxylase                                                                  |
| splicing factor, arginine/serine-rich 11                                                   |
| ATPase, H+ transporting, lysosomal V1 subunit H                                            |
| NADH dehydrogenase (ubiquinone) 1 alpha subcomplex 11                                      |
| RIKEN cDNA 5730536A07 gene                                                                 |
| RIKEN cDNA 4933426M11 gene                                                                 |
| yippee-like 3 (Drosophila)                                                                 |
| ATPase family, AAA domain containing 1                                                     |
| Dr1 associated protein 1 (negative cofactor 2 alpha)                                       |
| ribonuclease P 21 subunit (human)                                                          |

|                                                                                                                                                                                                                                                                                               |
|-----------------------------------------------------------------------------------------------------------------------------------------------------------------------------------------------------------------------------------------------------------------------------------------------|
| ATP-binding cassette, sub-family F (GCN20), member 3                                                                                                                                                                                                                                          |
| germ cell-specific gene 1                                                                                                                                                                                                                                                                     |
| NOP17                                                                                                                                                                                                                                                                                         |
| UDP-glucose ceramide glucosyltransferase                                                                                                                                                                                                                                                      |
| Eukaryotic translation elongation factor 1 beta 2                                                                                                                                                                                                                                             |
| WD repeat and HMG-box DNA binding protein 1                                                                                                                                                                                                                                                   |
| Tu translation elongation factor, mitochondrial /// similar to Tu translation elongation factor, mitochondrial                                                                                                                                                                                |
| phenylalkylamine Ca2+ antagonist (emopamil) binding protein                                                                                                                                                                                                                                   |
| glutamyl-prolyl-tRNA synthetase /// similar to Bifunctional aminoacyl-tRNA synthetase                                                                                                                                                                                                         |
| nudix (nucleoside diphosphate linked moiety X)-type motif 19                                                                                                                                                                                                                                  |
| serine peptidase inhibitor, Kazal type 3                                                                                                                                                                                                                                                      |
| mortality factor 4 like 2 /// similar to Mortality factor 4-like protein 2 (MORF-related gene X protein) (Transcription factor-like protein MRGX) (Sid 393) /// similar to Mortality factor 4-like protein 2 (MORF-related gene X protein) (Transcription factor-like protein MRGX) (Sid 393) |
| mortality factor 4 like 2                                                                                                                                                                                                                                                                     |
| RIKEN cDNA 5730469M10 gene                                                                                                                                                                                                                                                                    |
| ---                                                                                                                                                                                                                                                                                           |
| dynactin 5                                                                                                                                                                                                                                                                                    |
| TBC1 domain family, member 1                                                                                                                                                                                                                                                                  |
| Adaptor-related protein complex 2, sigma 1 subunit                                                                                                                                                                                                                                            |
| Adaptor-related protein complex 2, sigma 1 subunit                                                                                                                                                                                                                                            |
| RIKEN cDNA 3110001A13 gene                                                                                                                                                                                                                                                                    |
| presenilin associated, rhomboid-like                                                                                                                                                                                                                                                          |
| WAP four-disulfide core domain 2                                                                                                                                                                                                                                                              |
| bystin-like                                                                                                                                                                                                                                                                                   |
| ubiquitin specific peptidase 39                                                                                                                                                                                                                                                               |
| DCN1, defective in cullin neddylation 1, domain containing 5 (S. cerevisiae)                                                                                                                                                                                                                  |
| coronin, actin binding protein 1A                                                                                                                                                                                                                                                             |
| thioredoxin domain containing 14                                                                                                                                                                                                                                                              |
| AU RNA binding protein/enoyl-coenzyme A hydratase                                                                                                                                                                                                                                             |
| SWI/SNF related, matrix associated, actin dependent regulator of chromatin, subfamily e, member 1                                                                                                                                                                                             |
| mitochondrial ribosomal protein L28                                                                                                                                                                                                                                                           |
| ribonuclease T2                                                                                                                                                                                                                                                                               |
| WD repeat domain 48                                                                                                                                                                                                                                                                           |
| WD repeat domain 48                                                                                                                                                                                                                                                                           |
| WD repeat domain 48                                                                                                                                                                                                                                                                           |
| spermidine/spermine N1-acetyl transferase 1                                                                                                                                                                                                                                                   |
| RIKEN cDNA 2900010J23 gene                                                                                                                                                                                                                                                                    |
| nardilysin, N-arginine dibasic convertase, NRD convertase 1                                                                                                                                                                                                                                   |
| phosphatidic acid phosphatase type 2B                                                                                                                                                                                                                                                         |
| surfeit gene 6                                                                                                                                                                                                                                                                                |
| HECT, UBA and WWE domain containing 1                                                                                                                                                                                                                                                         |
| vacuolar protein sorting 26 homolog A (yeast)                                                                                                                                                                                                                                                 |
| N-terminal Asn amidase                                                                                                                                                                                                                                                                        |
| vacuolar protein sorting 41 (yeast)                                                                                                                                                                                                                                                           |
| translocase of inner mitochondrial membrane 17b                                                                                                                                                                                                                                               |
| RIKEN cDNA 2400003C14 gene                                                                                                                                                                                                                                                                    |
| glutathione S-transferase kappa 1                                                                                                                                                                                                                                                             |
| homeobox only domain                                                                                                                                                                                                                                                                          |
| transportin 3                                                                                                                                                                                                                                                                                 |
| unc-50 homolog (C. elegans)                                                                                                                                                                                                                                                                   |
| coiled-coil-helix-coiled-coil-helix domain containing 7                                                                                                                                                                                                                                       |
| SET domain containing (lysine methyltransferase) 8                                                                                                                                                                                                                                            |
| dehydrogenase/reductase (SDR family) member 4                                                                                                                                                                                                                                                 |
| DnaJ (Hsp40) homolog, subfamily B, member 9                                                                                                                                                                                                                                                   |

|                                                                                                              |
|--------------------------------------------------------------------------------------------------------------|
| DnaJ (Hsp40) homolog, subfamily B, member 9                                                                  |
| ST6 (alpha-N-acetyl-neuraminy1-2,3-beta-galactosyl-1,3)-N-acetylglactosaminide alpha-2,6-sialyltransferase 4 |
| G-rich RNA sequence binding factor 1                                                                         |
| RIKEN cDNA 1110002E23 gene /// gene model 939, (NCBI)                                                        |
| RIKEN cDNA 2010100O12 gene                                                                                   |
| RIKEN cDNA 2010100O12 gene /// similar to CG6878-PA                                                          |
| transmembrane protein 77                                                                                     |
| TAF11 RNA polymerase II, TATA box binding protein (TBP)-associated factor                                    |
| FGFR1 oncogene partner 2                                                                                     |
| arginyl-tRNA synthetase                                                                                      |
| T-cell leukemia/lymphoma 1B, 1                                                                               |
| ubiquitin-conjugating enzyme E2A, RAD6 homolog (S. cerevisiae)                                               |
| protein arginine N-methyltransferase 1                                                                       |
| proteasome (prosome, macropain) 26S subunit, non-ATPase, 5                                                   |
| high mobility group nucleosomal binding domain 1                                                             |
| RAS related protein 1b                                                                                       |
| ubiquitin-like 1 (sentrin) activating enzyme E1B                                                             |
| melanoma antigen, family D, 1                                                                                |
| stratifin                                                                                                    |
| zinc finger proliferation 1                                                                                  |
| transmembrane emp24 domain containing 3                                                                      |
| RIKEN cDNA 1110008P14 gene                                                                                   |
| H2A histone family, member V                                                                                 |
| zinc ribbon domain containing, 1                                                                             |
| SPARC related modular calcium binding 1                                                                      |
| 3'-phosphoadenosine 5'-phosphosulfate synthase 2                                                             |
| RIKEN cDNA 1110003E01 gene                                                                                   |
| DEAD (Asp-Glu-Ala-Asp) box polypeptide 47                                                                    |
| mammary tumor virus receptor 2                                                                               |
| parvalbumin                                                                                                  |
| parvalbumin                                                                                                  |
| phosphorylase kinase beta                                                                                    |
| synovial sarcoma, X breakpoint 2 interacting protein                                                         |
| synovial sarcoma, X breakpoint 2 interacting protein                                                         |
| capicua homolog (Drosophila)                                                                                 |
| cyclin-dependent kinase 8                                                                                    |
| WD repeat domain 45                                                                                          |
| eukaryotic translation initiation factor 4E binding protein 2                                                |
| tripeptidyl peptidase II                                                                                     |
| RIKEN cDNA 1110001P04 gene                                                                                   |
| WD repeat domain 40A                                                                                         |
| RAP1, GTP-GDP dissociation stimulator 1                                                                      |
| synaptojanin 2 binding protein                                                                               |
| START domain containing 10                                                                                   |
| LIM domain containing preferred translocation partner in lipoma                                              |
| TBC1 domain family, member 22a                                                                               |
| a disintegrin and metallopeptidase domain 9 (meltrin gamma)                                                  |
| Ubiquitin-fold modifier 1                                                                                    |
| PHD finger protein 12                                                                                        |
| dermatopontin                                                                                                |
| RIKEN cDNA 1810035L17 gene                                                                                   |
| acid phosphatase 6, lysophosphatidic                                                                         |
| dihydrolipoamide S-acetyltransferase (E2 component of pyruvate dehydrogenase complex)                        |



|                                                                                                    |
|----------------------------------------------------------------------------------------------------|
| dihydrolipoamide S-acetyltransferase (E2 component of pyruvate dehydrogenase complex)              |
| ras homolog gene family, member U                                                                  |
| transmembrane protein 30B                                                                          |
| transmembrane protein 30B                                                                          |
| integrin-linked kinase-associated serine/threonine phosphatase 2C                                  |
| ADP-ribosylation factor-like 5A                                                                    |
| intercellular adhesion molecule                                                                    |
| B-cell CLL/lymphoma 7C                                                                             |
| Transcribed locus                                                                                  |
| Eukaryotic translation termination factor 1                                                        |
| RIKEN cDNA 1110007M04 gene                                                                         |
| DNA segment, Chr 10, Johns Hopkins University 81 expressed                                         |
| SEC14-like 2 (S. cerevisiae)                                                                       |
| SEC14-like 2 (S. cerevisiae)                                                                       |
| translocase of inner mitochondrial membrane 9 homolog (yeast)                                      |
| solute carrier family 44, member 4                                                                 |
| transportin 1                                                                                      |
| sarcosine dehydrogenase                                                                            |
| interferon inducible GTPase 1                                                                      |
| paternally expressed 3                                                                             |
| TYRO3 protein tyrosine kinase 3                                                                    |
| membrane bound C2 domain containing protein                                                        |
| F-box and WD-40 domain protein 4                                                                   |
| deoxyribonuclease 1-like 2                                                                         |
| v-erb-b2 erythroblastic leukemia viral oncogene homolog 3 (avian)                                  |
| DNA primase, p49 subunit                                                                           |
| thioredoxin domain containing 4 (endoplasmic reticulum)                                            |
| pleckstrin homology domain containing, family C (with FERM domain) member 1                        |
| chromobox homolog 1 (Drosophila HP1 beta)                                                          |
| splicing factor 3b, subunit 1                                                                      |
| RRS1 ribosome biogenesis regulator homolog (S. cerevisiae)                                         |
| RIKEN cDNA 2410022L05 gene                                                                         |
| RIKEN cDNA 2410022L05 gene                                                                         |
| RRN3 RNA polymerase I transcription factor homolog (yeast)                                         |
| keratin complex 2, basic, gene 19                                                                  |
| mucin and cadherin like                                                                            |
| anillin, actin binding protein (scraps homolog, Drosophila)                                        |
| ankyrin repeat domain 47                                                                           |
| ankyrin repeat domain 47                                                                           |
| serine (or cysteine) peptidase inhibitor, clade A (alpha-1 antiproteinase, antitrypsin), member 10 |
| galactose mutarotase                                                                               |
| galactose mutarotase                                                                               |
| RIKEN cDNA 1500005K14 gene                                                                         |
| apolipoprotein B                                                                                   |
| DNA methyltransferase 1-associated protein 1                                                       |
| zinc finger protein 622                                                                            |
| fatty acid amide hydrolase                                                                         |
| UDP glucuronosyltransferase 2 family, polypeptide B5                                               |
| F-box and WD-40 domain protein 5                                                                   |
| F-box and WD-40 domain protein 5                                                                   |
| F-box and WD-40 domain protein 5                                                                   |
| adenylate kinase 1                                                                                 |
| programmed cell death protein 7                                                                    |

|                                                                                                                                                                         |
|-------------------------------------------------------------------------------------------------------------------------------------------------------------------------|
| glucan (1,4-alpha-), branching enzyme 1                                                                                                                                 |
| nucleolar protein 1                                                                                                                                                     |
| lipin 2                                                                                                                                                                 |
| interleukin 2 receptor, gamma chain                                                                                                                                     |
| ---                                                                                                                                                                     |
| LIM domain only 2                                                                                                                                                       |
| RAB31, member RAS oncogene family                                                                                                                                       |
| smoothened homolog (Drosophila)                                                                                                                                         |
| OTU domain containing 5                                                                                                                                                 |
| OTU domain containing 5                                                                                                                                                 |
| Ankyrin repeat and sterile alpha motif domain containing 3                                                                                                              |
| deltex 2 homolog (Drosophila)                                                                                                                                           |
| RIKEN cDNA 2310035K24 gene                                                                                                                                              |
| eukaryotic translation initiation factor 2B, subunit 5 epsilon                                                                                                          |
| SRY-box containing gene 15                                                                                                                                              |
| tensin like C1 domain-containing phosphatase                                                                                                                            |
| Microfibrillar-associated protein 4                                                                                                                                     |
| carbamoyl-phosphate synthetase 2, aspartate transcarbamylase, and dihydroorotase                                                                                        |
| glycine N-methyltransferase                                                                                                                                             |
| DNA segment, Chr 19, Wayne State University 162, expressed                                                                                                              |
| protein disulfide isomerase associated 5                                                                                                                                |
| solute carrier family 39 (zinc transporter), member 1                                                                                                                   |
| nuclear casein kinase and cyclin-dependent kinase substrate 1                                                                                                           |
| splicing factor, arginine/serine rich 9                                                                                                                                 |
| matrilin 4                                                                                                                                                              |
| zinc finger protein 161                                                                                                                                                 |
| open reading frame 61                                                                                                                                                   |
| RCE1 homolog, prenyl protein peptidase (S. cerevisiae)                                                                                                                  |
| RIKEN cDNA 1110014N23 gene                                                                                                                                              |
| gamma-aminobutyric acid (GABA-A) receptor-associated protein-like 2                                                                                                     |
| proviral integration site 3                                                                                                                                             |
| eukaryotic translation initiation factor 4E member 2                                                                                                                    |
| solute carrier family 30 (zinc transporter), member 9                                                                                                                   |
| serine (or cysteine) peptidase inhibitor, clade C (antithrombin), member 1                                                                                              |
| vacuolar protein sorting 28 (yeast)                                                                                                                                     |
| peptidase (mitochondrial processing) alpha                                                                                                                              |
| translocase of inner mitochondrial membrane 8 homolog a1 (yeast)                                                                                                        |
| eukaryotic translation initiation factor 4 gamma, 3                                                                                                                     |
| protein kinase, cAMP dependent regulatory, type I, alpha                                                                                                                |
| coatamer protein complex subunit alpha                                                                                                                                  |
| signal peptidase complex subunit 2 homolog (S. cerevisiae)                                                                                                              |
| complement component 1, q subcomponent binding protein                                                                                                                  |
| complement component 1, q subcomponent binding protein                                                                                                                  |
| programmed cell death 8                                                                                                                                                 |
| ring finger protein 10                                                                                                                                                  |
| mitochondrial ribosomal protein L50                                                                                                                                     |
| RIKEN cDNA 1110002B05 gene                                                                                                                                              |
| mitochondrial ribosomal protein S26                                                                                                                                     |
| 0 day neonate cerebellum cDNA, RIKEN full-length enriched library, clone:C230070N19 product:myristoylated alanine rich protein kinase C substrate, full insert sequence |
| arginine vasopressin-induced 1                                                                                                                                          |
| alpha-2-glycoprotein 1, zinc                                                                                                                                            |
| fibrinogen, B beta polypeptide                                                                                                                                          |
| gamma-aminobutyric acid receptor associated protein                                                                                                                     |

|                                                                                                                                                                                                                                                                                          |
|------------------------------------------------------------------------------------------------------------------------------------------------------------------------------------------------------------------------------------------------------------------------------------------|
| aconitase 2, mitochondrial                                                                                                                                                                                                                                                               |
| RIKEN cDNA 2310042G06 gene                                                                                                                                                                                                                                                               |
| small glutamine-rich tetratricopeptide repeat (TPR)-containing, alpha                                                                                                                                                                                                                    |
| Tax1 (human T-cell leukemia virus type I) binding protein 1                                                                                                                                                                                                                              |
| Tax1 (human T-cell leukemia virus type I) binding protein 1                                                                                                                                                                                                                              |
| Tax1 (human T-cell leukemia virus type I) binding protein 1                                                                                                                                                                                                                              |
| lysosomal-associated protein transmembrane 4A                                                                                                                                                                                                                                            |
| cytochrome b5 type B                                                                                                                                                                                                                                                                     |
| oxoglutarate dehydrogenase (lipoamide)                                                                                                                                                                                                                                                   |
| COMM domain containing 6                                                                                                                                                                                                                                                                 |
| dendritic cell protein GA17                                                                                                                                                                                                                                                              |
| eukaryotic translation initiation factor 3, subunit 4 (delta)                                                                                                                                                                                                                            |
| calcium regulated heat stable protein 1                                                                                                                                                                                                                                                  |
| 5'-nucleotidase domain containing 2                                                                                                                                                                                                                                                      |
| stabilin 1                                                                                                                                                                                                                                                                               |
| NADH dehydrogenase (ubiquinone) 1 beta subcomplex, 11                                                                                                                                                                                                                                    |
| aldo-keto reductase family 1, member A4 (aldehyde reductase)                                                                                                                                                                                                                             |
| RIKEN cDNA 1300002A08 gene                                                                                                                                                                                                                                                               |
| acidic nuclear phosphoprotein 32 family, member B /// similar to acidic nuclear phosphoprotein 32 family, member B                                                                                                                                                                       |
| proteasome (prosome, macropain) subunit, alpha type 1                                                                                                                                                                                                                                    |
| transmembrane emp24 protein transport domain containing 4                                                                                                                                                                                                                                |
| paraoxonase 1                                                                                                                                                                                                                                                                            |
| ARP2 actin-related protein 2 homolog (yeast)                                                                                                                                                                                                                                             |
| ATP synthase, H+ transporting, mitochondrial F0 complex, subunit b, isoform 1 /// similar to ATP synthase B chain, mitochondrial precursor /// similar to ATP synthase B chain, mitochondrial precursor /// similar to ATP synthase B chain, mitochondrial precursor                     |
| NADH dehydrogenase (ubiquinone) Fe-S protein 3                                                                                                                                                                                                                                           |
| Nur77 downstream gene 2                                                                                                                                                                                                                                                                  |
| coiled-coil domain containing 53                                                                                                                                                                                                                                                         |
| mitochondrial ribosomal protein S7                                                                                                                                                                                                                                                       |
| membrane interacting protein of RGS16                                                                                                                                                                                                                                                    |
| coiled-coil-helix-coiled-coil-helix domain containing 2 /// similar to coiled-coil-helix-coiled-coil-helix domain containing 2 /// similar to coiled-coil-helix-coiled-coil-helix domain containing 2 /// similar to coiled-coil-helix-coiled-coil-helix domain containing 2             |
| calcium homeostasis endoplasmic reticulum protein                                                                                                                                                                                                                                        |
| RIKEN cDNA 1110014F24 gene                                                                                                                                                                                                                                                               |
| NADH dehydrogenase (ubiquinone) 1, alpha/beta subcomplex, 1                                                                                                                                                                                                                              |
| acyl-CoA synthetase medium-chain family member 2                                                                                                                                                                                                                                         |
| guanine nucleotide binding protein, beta 2                                                                                                                                                                                                                                               |
| cytotoxic T lymphocyte-associated protein 2 alpha /// cytotoxic T lymphocyte-associated protein 2 beta                                                                                                                                                                                   |
| hydroxyacyl-Coenzyme A dehydrogenase/3-ketoacyl-Coenzyme A thiolase/enoyl-Coenzyme A hydratase (trifunctional protein), beta subunit /// similar to hydroxyacyl-Coenzyme A dehydrogenase/3-ketoacyl-Coenzyme A thiolase/enoyl-Coenzyme A hydratase (trifunctional protein), beta subunit |
| NADH dehydrogenase (ubiquinone) 1 alpha subcomplex, 3                                                                                                                                                                                                                                    |
| mitochondrial ribosomal protein L33                                                                                                                                                                                                                                                      |
| RIKEN cDNA 2410166I05 gene                                                                                                                                                                                                                                                               |
| fructose bisphosphatase 1                                                                                                                                                                                                                                                                |
| ATPase, H+ transporting, lysosomal V0 subunit C                                                                                                                                                                                                                                          |
| HtrA serine peptidase 1                                                                                                                                                                                                                                                                  |
| tetratricopeptide repeat domain 1                                                                                                                                                                                                                                                        |
| WD repeat domain containing 82                                                                                                                                                                                                                                                           |
| glycosyltransferase 25 domain containing 1                                                                                                                                                                                                                                               |
| SPARC related modular calcium binding 2                                                                                                                                                                                                                                                  |
| EH-domain containing 1                                                                                                                                                                                                                                                                   |
| EH-domain containing 1                                                                                                                                                                                                                                                                   |
| ---                                                                                                                                                                                                                                                                                      |
| NudC domain containing 2                                                                                                                                                                                                                                                                 |

|                                                                                                                                                                                                                                                                                                                                                                                                                                                                                                                                                                                                                                                                                                                                                                                                                                                                                                                                                                           |
|---------------------------------------------------------------------------------------------------------------------------------------------------------------------------------------------------------------------------------------------------------------------------------------------------------------------------------------------------------------------------------------------------------------------------------------------------------------------------------------------------------------------------------------------------------------------------------------------------------------------------------------------------------------------------------------------------------------------------------------------------------------------------------------------------------------------------------------------------------------------------------------------------------------------------------------------------------------------------|
| myeloma overexpressed 2                                                                                                                                                                                                                                                                                                                                                                                                                                                                                                                                                                                                                                                                                                                                                                                                                                                                                                                                                   |
| PDZK1 interacting protein 1                                                                                                                                                                                                                                                                                                                                                                                                                                                                                                                                                                                                                                                                                                                                                                                                                                                                                                                                               |
| coatomer protein complex, subunit gamma                                                                                                                                                                                                                                                                                                                                                                                                                                                                                                                                                                                                                                                                                                                                                                                                                                                                                                                                   |
| prefoldin 1                                                                                                                                                                                                                                                                                                                                                                                                                                                                                                                                                                                                                                                                                                                                                                                                                                                                                                                                                               |
| kidney expressed gene 1                                                                                                                                                                                                                                                                                                                                                                                                                                                                                                                                                                                                                                                                                                                                                                                                                                                                                                                                                   |
| myosin, light polypeptide 9, regulatory                                                                                                                                                                                                                                                                                                                                                                                                                                                                                                                                                                                                                                                                                                                                                                                                                                                                                                                                   |
| TEA domain family member 2                                                                                                                                                                                                                                                                                                                                                                                                                                                                                                                                                                                                                                                                                                                                                                                                                                                                                                                                                |
| RAB, member of RAS oncogene family-like 4                                                                                                                                                                                                                                                                                                                                                                                                                                                                                                                                                                                                                                                                                                                                                                                                                                                                                                                                 |
| eukaryotic translation initiation factor 3, subunit 6 interacting protein                                                                                                                                                                                                                                                                                                                                                                                                                                                                                                                                                                                                                                                                                                                                                                                                                                                                                                 |
| G protein pathway suppressor 1                                                                                                                                                                                                                                                                                                                                                                                                                                                                                                                                                                                                                                                                                                                                                                                                                                                                                                                                            |
| synaptosomal-associated protein 23                                                                                                                                                                                                                                                                                                                                                                                                                                                                                                                                                                                                                                                                                                                                                                                                                                                                                                                                        |
| LSM1 homolog, U6 small nuclear RNA associated (S. cerevisiae)                                                                                                                                                                                                                                                                                                                                                                                                                                                                                                                                                                                                                                                                                                                                                                                                                                                                                                             |
| electron transferring flavoprotein, beta polypeptide                                                                                                                                                                                                                                                                                                                                                                                                                                                                                                                                                                                                                                                                                                                                                                                                                                                                                                                      |
| quininoid dihydropteridine reductase                                                                                                                                                                                                                                                                                                                                                                                                                                                                                                                                                                                                                                                                                                                                                                                                                                                                                                                                      |
| YTH domain family 1                                                                                                                                                                                                                                                                                                                                                                                                                                                                                                                                                                                                                                                                                                                                                                                                                                                                                                                                                       |
| chemokine (C-C motif) ligand 19                                                                                                                                                                                                                                                                                                                                                                                                                                                                                                                                                                                                                                                                                                                                                                                                                                                                                                                                           |
| ATPase, H+ transporting, lysosomal V1 subunit D                                                                                                                                                                                                                                                                                                                                                                                                                                                                                                                                                                                                                                                                                                                                                                                                                                                                                                                           |
| proteasome (prosome, macropain) subunit, alpha type 6                                                                                                                                                                                                                                                                                                                                                                                                                                                                                                                                                                                                                                                                                                                                                                                                                                                                                                                     |
| chemokine (C-X-C motif) ligand 14                                                                                                                                                                                                                                                                                                                                                                                                                                                                                                                                                                                                                                                                                                                                                                                                                                                                                                                                         |
| serine/threonine kinase 24 (STE20 homolog, yeast)                                                                                                                                                                                                                                                                                                                                                                                                                                                                                                                                                                                                                                                                                                                                                                                                                                                                                                                         |
| ATPase, H+ transporting, lysosomal V0 subunit E2                                                                                                                                                                                                                                                                                                                                                                                                                                                                                                                                                                                                                                                                                                                                                                                                                                                                                                                          |
| peroxiredoxin 5                                                                                                                                                                                                                                                                                                                                                                                                                                                                                                                                                                                                                                                                                                                                                                                                                                                                                                                                                           |
| calcium and integrin binding 1 (calmyrin)                                                                                                                                                                                                                                                                                                                                                                                                                                                                                                                                                                                                                                                                                                                                                                                                                                                                                                                                 |
| calcium and integrin binding 1 (calmyrin)                                                                                                                                                                                                                                                                                                                                                                                                                                                                                                                                                                                                                                                                                                                                                                                                                                                                                                                                 |
| ubiquitin-conjugating enzyme E2N                                                                                                                                                                                                                                                                                                                                                                                                                                                                                                                                                                                                                                                                                                                                                                                                                                                                                                                                          |
| Polycomb group ring finger 2                                                                                                                                                                                                                                                                                                                                                                                                                                                                                                                                                                                                                                                                                                                                                                                                                                                                                                                                              |
| ribosomal protein L6                                                                                                                                                                                                                                                                                                                                                                                                                                                                                                                                                                                                                                                                                                                                                                                                                                                                                                                                                      |
| Anti-preS1 immunoglobulin light chain variable region /// Immunoglobulin kappa chain complex                                                                                                                                                                                                                                                                                                                                                                                                                                                                                                                                                                                                                                                                                                                                                                                                                                                                              |
| immunoglobulin kappa chain variable 6-23 /// immunoglobulin kappa chain variable 19 (V19)-17 /// immunoglobulin kappa chain variable 19 (V19)-14 /// immunoglobulin kappa chain variable 19 (V19)-13 /// similar to Ig kappa chain V-V region MPC11 precursor /// similar to Ig kappa chain V-V region MPC11 precursor /// similar to Ig kappa chain V-V region MPC11 precursor /// similar to Ig kappa chain V-V region MPC11 precursor /// similar to Ig kappa chain V-V region MPC11 precursor                                                                                                                                                                                                                                                                                                                                                                                                                                                                         |
| crystallin, gamma D /// crystallin, gamma F                                                                                                                                                                                                                                                                                                                                                                                                                                                                                                                                                                                                                                                                                                                                                                                                                                                                                                                               |
| Immunoglobulin heavy chain 1a (serum IgG2a)                                                                                                                                                                                                                                                                                                                                                                                                                                                                                                                                                                                                                                                                                                                                                                                                                                                                                                                               |
| PREDICTED: Mus musculus similar to T-cell receptor beta chain V region CTL-L17 precursor (LOC386479), mRNA                                                                                                                                                                                                                                                                                                                                                                                                                                                                                                                                                                                                                                                                                                                                                                                                                                                                |
| interferon zeta                                                                                                                                                                                                                                                                                                                                                                                                                                                                                                                                                                                                                                                                                                                                                                                                                                                                                                                                                           |
| immunoglobulin kappa chain variable 2-112                                                                                                                                                                                                                                                                                                                                                                                                                                                                                                                                                                                                                                                                                                                                                                                                                                                                                                                                 |
| Similar to immunoglobulin heavy chain variable region                                                                                                                                                                                                                                                                                                                                                                                                                                                                                                                                                                                                                                                                                                                                                                                                                                                                                                                     |
| gene model 189, (NCBI) /// gene model 459, (NCBI) /// gene model 1418, (NCBI) /// gene model 1419, (NCBI) /// immunoglobulin kappa chain variable 4-61 /// immunoglobulin kappa chain variable 4-56 /// immunoglobulin kappa chain variable 4-73 /// immunoglobulin kappa chain variable 4-69 /// immunoglobulin kappa chain variable 4-63 /// similar to Ig kappa chain V-IV region S107B precursor /// similar to Ig kappa chain V-IV region S107B precursor /// similar to Ig kappa chain V-IV region S107B precursor /// immunoglobulin kappa chain variable 4-62 /// similar to Ig kappa chain V-VI region NQ2-17.4.1 /// immunoglobulin kappa chain variable 4-77 /// similar to Ig kappa chain V-IV region S107B precursor /// similar to Ig kappa chain V-IV region S107B precursor /// similar to Ig kappa chain V-IV region S107B precursor /// similar to Ig kappa chain V-IV region S107B precursor /// similar to Ig kappa chain V-IV region S107B precursor |
| gene model 1077, (NCBI) /// immunoglobulin kappa chain variable 4-73 /// similar to Ig kappa chain V-IV region S107B precursor                                                                                                                                                                                                                                                                                                                                                                                                                                                                                                                                                                                                                                                                                                                                                                                                                                            |
| similar to Ig heavy chain V-I region V35 precursor                                                                                                                                                                                                                                                                                                                                                                                                                                                                                                                                                                                                                                                                                                                                                                                                                                                                                                                        |
| hypothetical protein LOC624610 /// similar to Ig kappa chain V-V region L6 precursor                                                                                                                                                                                                                                                                                                                                                                                                                                                                                                                                                                                                                                                                                                                                                                                                                                                                                      |
| immunoglobulin kappa chain variable 1 (V1) /// immunoglobulin kappa chain variable 1-117 /// immunoglobulin kappa chain variable 5 (V5 family) /// Ig kappa chain /// immunoglobulin kappa chain variable 1-110                                                                                                                                                                                                                                                                                                                                                                                                                                                                                                                                                                                                                                                                                                                                                           |
| histocompatibility 2, T region locus 18 /// histocompatibility 2, T region locus 3 /// similar to histocompatibility 2, T region locus 3 /// MHC class I antigen /// similar to histocompatibility 2, T region locus 3 /// similar to histocompatibility 2, T region locus 3                                                                                                                                                                                                                                                                                                                                                                                                                                                                                                                                                                                                                                                                                              |
| similar to RT1 class Ib gene, H2-TL-like, grc region (N3)                                                                                                                                                                                                                                                                                                                                                                                                                                                                                                                                                                                                                                                                                                                                                                                                                                                                                                                 |
| synaptotagmin-like 4                                                                                                                                                                                                                                                                                                                                                                                                                                                                                                                                                                                                                                                                                                                                                                                                                                                                                                                                                      |
| synaptotagmin X                                                                                                                                                                                                                                                                                                                                                                                                                                                                                                                                                                                                                                                                                                                                                                                                                                                                                                                                                           |
| myosin, heavy polypeptide 10, non-muscle                                                                                                                                                                                                                                                                                                                                                                                                                                                                                                                                                                                                                                                                                                                                                                                                                                                                                                                                  |
| olfactory receptor 1507                                                                                                                                                                                                                                                                                                                                                                                                                                                                                                                                                                                                                                                                                                                                                                                                                                                                                                                                                   |
| olfactory receptor 1507 /// olfactory receptor 1508                                                                                                                                                                                                                                                                                                                                                                                                                                                                                                                                                                                                                                                                                                                                                                                                                                                                                                                       |

|                                                                                                                                                                                                                                                                                                                                                                                                                                                                                                                                                                                                                                                                                                                                                                                                                                                                                                                                                                   |
|-------------------------------------------------------------------------------------------------------------------------------------------------------------------------------------------------------------------------------------------------------------------------------------------------------------------------------------------------------------------------------------------------------------------------------------------------------------------------------------------------------------------------------------------------------------------------------------------------------------------------------------------------------------------------------------------------------------------------------------------------------------------------------------------------------------------------------------------------------------------------------------------------------------------------------------------------------------------|
| olfactory receptor 1508                                                                                                                                                                                                                                                                                                                                                                                                                                                                                                                                                                                                                                                                                                                                                                                                                                                                                                                                           |
| olfactory receptor 1509                                                                                                                                                                                                                                                                                                                                                                                                                                                                                                                                                                                                                                                                                                                                                                                                                                                                                                                                           |
| olfactory receptor 1264                                                                                                                                                                                                                                                                                                                                                                                                                                                                                                                                                                                                                                                                                                                                                                                                                                                                                                                                           |
| olfactory receptor 140                                                                                                                                                                                                                                                                                                                                                                                                                                                                                                                                                                                                                                                                                                                                                                                                                                                                                                                                            |
| myeloid/lymphoid or mixed lineage-leukemia translocation to 7 homolog (Drosophila)                                                                                                                                                                                                                                                                                                                                                                                                                                                                                                                                                                                                                                                                                                                                                                                                                                                                                |
| similar to Ig kappa chain V-IV region B17 precursor /// immunoglobulin kappa chain variable 19 (V19)-17 /// similar to Ig kappa chain V-V region MPC11 precursor /// similar to Ig kappa chain V-IV region precursor /// similar to Ig kappa chain V-V region MPC11 precursor                                                                                                                                                                                                                                                                                                                                                                                                                                                                                                                                                                                                                                                                                     |
| paired box gene 5                                                                                                                                                                                                                                                                                                                                                                                                                                                                                                                                                                                                                                                                                                                                                                                                                                                                                                                                                 |
| hypermethylated in cancer 1                                                                                                                                                                                                                                                                                                                                                                                                                                                                                                                                                                                                                                                                                                                                                                                                                                                                                                                                       |
| similar to spermine synthase /// similar to spermine synthase /// similar to Spermine synthase (Spermidine aminopropyltransferase) (SPMSY) /// hypothetical protein LOC673187 /// similar to spermine synthase                                                                                                                                                                                                                                                                                                                                                                                                                                                                                                                                                                                                                                                                                                                                                    |
| cholinergic receptor, nicotinic, alpha polypeptide 6                                                                                                                                                                                                                                                                                                                                                                                                                                                                                                                                                                                                                                                                                                                                                                                                                                                                                                              |
| amiloride-sensitive cation channel 5, intestinal                                                                                                                                                                                                                                                                                                                                                                                                                                                                                                                                                                                                                                                                                                                                                                                                                                                                                                                  |
| UDP-N-acetyl-alpha-D-galactosamine:polypeptide N-acetylgalactosaminyltransferase 6                                                                                                                                                                                                                                                                                                                                                                                                                                                                                                                                                                                                                                                                                                                                                                                                                                                                                |
| olfactory receptor 155                                                                                                                                                                                                                                                                                                                                                                                                                                                                                                                                                                                                                                                                                                                                                                                                                                                                                                                                            |
| olfactory receptor 156 /// olfactory receptor 157                                                                                                                                                                                                                                                                                                                                                                                                                                                                                                                                                                                                                                                                                                                                                                                                                                                                                                                 |
| olfactory receptor 157                                                                                                                                                                                                                                                                                                                                                                                                                                                                                                                                                                                                                                                                                                                                                                                                                                                                                                                                            |
| olfactory receptor 29, pseudogene 1                                                                                                                                                                                                                                                                                                                                                                                                                                                                                                                                                                                                                                                                                                                                                                                                                                                                                                                               |
| olfactory receptor 159                                                                                                                                                                                                                                                                                                                                                                                                                                                                                                                                                                                                                                                                                                                                                                                                                                                                                                                                            |
| olfactory receptor 71                                                                                                                                                                                                                                                                                                                                                                                                                                                                                                                                                                                                                                                                                                                                                                                                                                                                                                                                             |
| olfactory receptor 70                                                                                                                                                                                                                                                                                                                                                                                                                                                                                                                                                                                                                                                                                                                                                                                                                                                                                                                                             |
| leukemia inhibitory factor receptor                                                                                                                                                                                                                                                                                                                                                                                                                                                                                                                                                                                                                                                                                                                                                                                                                                                                                                                               |
| sperm motility kinase 2-like /// RIKEN cDNA 4931427P12 gene /// similar to serine/threonine kinase                                                                                                                                                                                                                                                                                                                                                                                                                                                                                                                                                                                                                                                                                                                                                                                                                                                                |
| immunoglobulin heavy chain complex /// immunoglobulin heavy chain 1a (serum IgG2a) /// expressed sequence A1324046 /// similar to Ig heavy chain V-I region HG3 precursor /// similar to Ig heavy chain V-I region V35 precursor /// similar to Ig heavy chain V region 108A precursor /// similar to Ig heavy chain V region AC38 205.12 /// similar to Ig heavy chain V-I region HG3 precursor /// similar to Ig heavy chain V-I region HG3 precursor /// similar to Ig heavy chain V region 108A precursor /// similar to Ig heavy chain V-I region V35 precursor /// similar to Ig heavy chain V region 108A precursor /// similar to Ig heavy chain V-I region V35 precursor /// similar to Ig heavy chain V region 108A precursor /// similar to Ig heavy chain V-I region V35 precursor /// similar to Ig heavy chain V region 108A precursor /// similar to Ig heavy chain V-I region HG3 precursor /// similar to Ig heavy chain V region 108A precursor |
| similar to Ig heavy chain V-I region V35 precursor /// similar to Ig heavy chain V-I region V35 precursor                                                                                                                                                                                                                                                                                                                                                                                                                                                                                                                                                                                                                                                                                                                                                                                                                                                         |
| cholinergic receptor, nicotinic, beta polypeptide 2 (neuronal)                                                                                                                                                                                                                                                                                                                                                                                                                                                                                                                                                                                                                                                                                                                                                                                                                                                                                                    |
| aurora kinase A interacting protein 1                                                                                                                                                                                                                                                                                                                                                                                                                                                                                                                                                                                                                                                                                                                                                                                                                                                                                                                             |
| cytochrome b-245, alpha polypeptide                                                                                                                                                                                                                                                                                                                                                                                                                                                                                                                                                                                                                                                                                                                                                                                                                                                                                                                               |
| ---                                                                                                                                                                                                                                                                                                                                                                                                                                                                                                                                                                                                                                                                                                                                                                                                                                                                                                                                                               |
| RIKEN cDNA A130038H09 gene                                                                                                                                                                                                                                                                                                                                                                                                                                                                                                                                                                                                                                                                                                                                                                                                                                                                                                                                        |
| ---                                                                                                                                                                                                                                                                                                                                                                                                                                                                                                                                                                                                                                                                                                                                                                                                                                                                                                                                                               |
| Von Willebrand factor homolog                                                                                                                                                                                                                                                                                                                                                                                                                                                                                                                                                                                                                                                                                                                                                                                                                                                                                                                                     |
| chemokine (C motif) receptor 1                                                                                                                                                                                                                                                                                                                                                                                                                                                                                                                                                                                                                                                                                                                                                                                                                                                                                                                                    |
| mitogen activated protein kinase binding protein 1                                                                                                                                                                                                                                                                                                                                                                                                                                                                                                                                                                                                                                                                                                                                                                                                                                                                                                                |
| peroxiredoxin 1                                                                                                                                                                                                                                                                                                                                                                                                                                                                                                                                                                                                                                                                                                                                                                                                                                                                                                                                                   |
| RAB33B, member of RAS oncogene family                                                                                                                                                                                                                                                                                                                                                                                                                                                                                                                                                                                                                                                                                                                                                                                                                                                                                                                             |
| tyrosine 3-monooxygenase/tryptophan 5-monooxygenase activation protein, theta polypeptide /// similar to 14-3-3 protein theta (14-3-3 protein tau) /// similar to 14-3-3 protein theta (14-3-3 protein tau)                                                                                                                                                                                                                                                                                                                                                                                                                                                                                                                                                                                                                                                                                                                                                       |
| tyrosine 3-monooxygenase/tryptophan 5-monooxygenase activation protein, theta polypeptide                                                                                                                                                                                                                                                                                                                                                                                                                                                                                                                                                                                                                                                                                                                                                                                                                                                                         |
| ---                                                                                                                                                                                                                                                                                                                                                                                                                                                                                                                                                                                                                                                                                                                                                                                                                                                                                                                                                               |
| reticulon 3                                                                                                                                                                                                                                                                                                                                                                                                                                                                                                                                                                                                                                                                                                                                                                                                                                                                                                                                                       |
| expressed sequence C79562                                                                                                                                                                                                                                                                                                                                                                                                                                                                                                                                                                                                                                                                                                                                                                                                                                                                                                                                         |
| pink-eyed dilution                                                                                                                                                                                                                                                                                                                                                                                                                                                                                                                                                                                                                                                                                                                                                                                                                                                                                                                                                |
| eukaryotic translation initiation factor 2, subunit 2 (beta)                                                                                                                                                                                                                                                                                                                                                                                                                                                                                                                                                                                                                                                                                                                                                                                                                                                                                                      |
| expressed sequence C80993                                                                                                                                                                                                                                                                                                                                                                                                                                                                                                                                                                                                                                                                                                                                                                                                                                                                                                                                         |
| DNA segment, Chr 8, ERATO Doi 362, expressed                                                                                                                                                                                                                                                                                                                                                                                                                                                                                                                                                                                                                                                                                                                                                                                                                                                                                                                      |
| pregnancy specific glycoprotein pseudogene 1                                                                                                                                                                                                                                                                                                                                                                                                                                                                                                                                                                                                                                                                                                                                                                                                                                                                                                                      |
| pregnancy specific glycoprotein pseudogene 1                                                                                                                                                                                                                                                                                                                                                                                                                                                                                                                                                                                                                                                                                                                                                                                                                                                                                                                      |
| Protein tyrosine phosphatase, non-receptor type 6                                                                                                                                                                                                                                                                                                                                                                                                                                                                                                                                                                                                                                                                                                                                                                                                                                                                                                                 |
| folate hydrolase                                                                                                                                                                                                                                                                                                                                                                                                                                                                                                                                                                                                                                                                                                                                                                                                                                                                                                                                                  |
| transcription factor 20                                                                                                                                                                                                                                                                                                                                                                                                                                                                                                                                                                                                                                                                                                                                                                                                                                                                                                                                           |
| receptor (TNFRSF)-interacting serine-threonine kinase 1                                                                                                                                                                                                                                                                                                                                                                                                                                                                                                                                                                                                                                                                                                                                                                                                                                                                                                           |

|                                                                                           |
|-------------------------------------------------------------------------------------------|
| mesoderm posterior 2                                                                      |
| phosphorylase kinase gamma 1                                                              |
| Budding uninhibited by benzimidazoles 1 homolog (S. cerevisiae)                           |
| protein kinase, cAMP dependent regulatory, type II alpha                                  |
| myosin IXa                                                                                |
| threonine aldolase 1                                                                      |
| solute carrier family 4 (anion exchanger), member 8                                       |
| potassium intermediate/small conductance calcium-activated channel, subfamily N, member 1 |
| Myosin, light polypeptide 6B                                                              |
| YME1-like 1 (S. cerevisiae)                                                               |
| riboflavin kinase                                                                         |
| riboflavin kinase                                                                         |
| zinc finger CCCH-type containing 12C                                                      |
| mitogen activated protein kinase kinase kinase 8                                          |
| MTERF domain containing 3                                                                 |
| RecQ protein-like 5                                                                       |
| tryptase alpha/beta 1                                                                     |
| Transcribed locus                                                                         |
| trafficking protein, kinesin binding 2                                                    |
| MRV integration site 1                                                                    |
| Fas ligand (TNF superfamily, member 6)                                                    |
| prosaposin                                                                                |
| Similar to zinc finger protein 709                                                        |
| expressed sequence AW544981                                                               |
| distal-less homeobox 1, antisense                                                         |
| RIKEN cDNA A630007B06 gene /// similar to oocyte-testis gene 1                            |
| expressed sequence AI596198                                                               |
| DNA segment, Chr 7, ERATO Doi 59, expressed                                               |
| fibroblast growth factor 6                                                                |
| sine oculis-related homeobox 5 homolog (Drosophila)                                       |
| nuclear receptor subfamily 0, group B, member 2                                           |
| deafness, autosomal dominant 5 homolog (human)                                            |
| MHC (A.CA/J(H-2K-f) class I antigen                                                       |
| ryanodine receptor 3                                                                      |
| vomeronasal 2, receptor, 15                                                               |
| interleukin 5 receptor, alpha                                                             |
| cDNA sequence BC052688                                                                    |
| arginine-tRNA-protein transferase 1                                                       |
| serine/threonine kinase 11 interacting protein                                            |
| sterol O-acyltransferase 2                                                                |
| Expressed sequence AA673488                                                               |
| expressed sequence AA517864                                                               |
| Regulatory factor X, 4 (influences HLA class II expression)                               |
| Transient receptor potential cation channel, subfamily M, member 7                        |
| expressed sequence C77027                                                                 |
| cDNA sequence BC026657                                                                    |
| EST C77614                                                                                |
| DNA segment, Chr 1, ERATO Doi 75, expressed                                               |
| DNA segment, Chr 3, ERATO Doi 229, expressed                                              |
| DNA segment, Chr X, ERATO Doi 242, expressed                                              |
| Inhibitor of growth family, member 4                                                      |
| expressed sequence C78441                                                                 |
| expressed sequence C80197 /// SPFH domain family, member 1                                |

|                                                                                                                                                                                                                                                                                                                                                                                                                                                                                                                           |
|---------------------------------------------------------------------------------------------------------------------------------------------------------------------------------------------------------------------------------------------------------------------------------------------------------------------------------------------------------------------------------------------------------------------------------------------------------------------------------------------------------------------------|
| expressed sequence C80197                                                                                                                                                                                                                                                                                                                                                                                                                                                                                                 |
| RIKEN cDNA C530030P08 gene                                                                                                                                                                                                                                                                                                                                                                                                                                                                                                |
| Kinesin family member C1                                                                                                                                                                                                                                                                                                                                                                                                                                                                                                  |
| retina and anterior neural fold homeobox                                                                                                                                                                                                                                                                                                                                                                                                                                                                                  |
| solute carrier family 10, member 2                                                                                                                                                                                                                                                                                                                                                                                                                                                                                        |
| G protein-coupled receptor 27                                                                                                                                                                                                                                                                                                                                                                                                                                                                                             |
| keratin associated protein 8-2                                                                                                                                                                                                                                                                                                                                                                                                                                                                                            |
| inhibin beta E                                                                                                                                                                                                                                                                                                                                                                                                                                                                                                            |
| Similar to zinc finger protein 665                                                                                                                                                                                                                                                                                                                                                                                                                                                                                        |
| growth differentiation factor 8                                                                                                                                                                                                                                                                                                                                                                                                                                                                                           |
| hairy and enhancer of split 3 (Drosophila)                                                                                                                                                                                                                                                                                                                                                                                                                                                                                |
| NK-3 transcription factor, locus 1 (Drosophila)                                                                                                                                                                                                                                                                                                                                                                                                                                                                           |
| zinc finger protein 651                                                                                                                                                                                                                                                                                                                                                                                                                                                                                                   |
| autoimmune regulator (autoimmune polyendocrinopathy candidiasis ectodermal dystrophy)                                                                                                                                                                                                                                                                                                                                                                                                                                     |
| secreted acidic cysteine rich glycoprotein                                                                                                                                                                                                                                                                                                                                                                                                                                                                                |
| splicing factor proline/glutamine rich (polypyrimidine tract binding protein associated)                                                                                                                                                                                                                                                                                                                                                                                                                                  |
| Interferon activated gene 203                                                                                                                                                                                                                                                                                                                                                                                                                                                                                             |
| RIKEN cDNA D030022P06 gene                                                                                                                                                                                                                                                                                                                                                                                                                                                                                                |
| deleted in lymphocytic leukemia 8                                                                                                                                                                                                                                                                                                                                                                                                                                                                                         |
| DNA segment, Chr 2, ERATO Doi 93, expressed                                                                                                                                                                                                                                                                                                                                                                                                                                                                               |
| elaC homolog 2 (E. coli)                                                                                                                                                                                                                                                                                                                                                                                                                                                                                                  |
| elaC homolog 2 (E. coli)                                                                                                                                                                                                                                                                                                                                                                                                                                                                                                  |
| purinergic receptor P2Y, G-protein coupled 1                                                                                                                                                                                                                                                                                                                                                                                                                                                                              |
| hypothetical protein LOC639910                                                                                                                                                                                                                                                                                                                                                                                                                                                                                            |
| expressed sequence C78344                                                                                                                                                                                                                                                                                                                                                                                                                                                                                                 |
| Immunoglobulin kappa chain complex                                                                                                                                                                                                                                                                                                                                                                                                                                                                                        |
| ATP-binding cassette, sub-family C (CFTR/MRP), member 9                                                                                                                                                                                                                                                                                                                                                                                                                                                                   |
| histocompatibility 2, Q region locus 2 /// similar to H-2 class I histocompatibility antigen, D-K alpha chain precursor (H-2D(K)) /// similar to H-2 class I histocompatibility antigen, D-K alpha chain precursor (H-2D(K))                                                                                                                                                                                                                                                                                              |
| RIKEN cDNA 2410017I17 gene                                                                                                                                                                                                                                                                                                                                                                                                                                                                                                |
| molybdenum cofactor synthesis 1                                                                                                                                                                                                                                                                                                                                                                                                                                                                                           |
| ATPase, class I, type 8B, member 1                                                                                                                                                                                                                                                                                                                                                                                                                                                                                        |
| ORFs (putative primordial protein)                                                                                                                                                                                                                                                                                                                                                                                                                                                                                        |
| expressed sequence AI314034                                                                                                                                                                                                                                                                                                                                                                                                                                                                                               |
| cDNA sequence BC048355                                                                                                                                                                                                                                                                                                                                                                                                                                                                                                    |
| hemoglobin Y, beta-like embryonic chain                                                                                                                                                                                                                                                                                                                                                                                                                                                                                   |
| CCR4 carbon catabolite repression 4-like (S. cerevisiae) /// SH3-domain GRB2-like (endophilin) interacting protein 1 /// pol polyprotein /// Gag /// gag protein                                                                                                                                                                                                                                                                                                                                                          |
| cyclin E2                                                                                                                                                                                                                                                                                                                                                                                                                                                                                                                 |
| TBC1 domain family, member 22a                                                                                                                                                                                                                                                                                                                                                                                                                                                                                            |
| aryl hydrocarbon receptor nuclear translocator                                                                                                                                                                                                                                                                                                                                                                                                                                                                            |
| Serine/threonine kinase 25 (yeast)                                                                                                                                                                                                                                                                                                                                                                                                                                                                                        |
| DNA segment, Chr 7, Wayne State University 130, expressed                                                                                                                                                                                                                                                                                                                                                                                                                                                                 |
| expressed sequence AW121686                                                                                                                                                                                                                                                                                                                                                                                                                                                                                               |
| Ubiquitin protein ligase E3C                                                                                                                                                                                                                                                                                                                                                                                                                                                                                              |
| ---                                                                                                                                                                                                                                                                                                                                                                                                                                                                                                                       |
| ---                                                                                                                                                                                                                                                                                                                                                                                                                                                                                                                       |
| ---                                                                                                                                                                                                                                                                                                                                                                                                                                                                                                                       |
| transcription factor CP2-like 1                                                                                                                                                                                                                                                                                                                                                                                                                                                                                           |
| expressed sequence AA408251                                                                                                                                                                                                                                                                                                                                                                                                                                                                                               |
| guanine nucleotide binding protein, alpha inhibiting 1                                                                                                                                                                                                                                                                                                                                                                                                                                                                    |
| pregnancy specific glycoprotein 19                                                                                                                                                                                                                                                                                                                                                                                                                                                                                        |
| Friend virus susceptibility 4 /// expressed sequence AI506816 /// similar to melanoma antigen /// similar to melanoma antigen /// envelope polyprotein /// similar to melanoma antigen /// hypothetical protein LOC670510 /// similar to melanoma antigen /// similar to melanoma antigen /// similar to melanoma antigen |
| ATP-binding cassette, sub-family A (ABC1), member 1                                                                                                                                                                                                                                                                                                                                                                                                                                                                       |

|                                                                            |
|----------------------------------------------------------------------------|
| RNA binding motif protein 12 /// copine I                                  |
| small nuclear ribonucleoprotein E                                          |
| NADH dehydrogenase (ubiquinone) 1 alpha subcomplex, 5                      |
| MARCKS-like 1                                                              |
| DnaJ (Hsp40) homolog, subfamily C, member 15                               |
| eukaryotic translation initiation factor 3, subunit 1 alpha                |
| serine protease inhibitor, Kunitz type 1                                   |
| lysophospholipase 1                                                        |
| ash2 (absent, small, or homeotic)-like (Drosophila)                        |
| RIKEN cDNA 1700037H04 gene                                                 |
| armadillo repeat containing, X-linked 2                                    |
| feminization 1 homolog a (C. elegans)                                      |
| pregnancy zone protein                                                     |
| S-adenosylhomocysteine hydrolase-like 1                                    |
| Down syndrome critical region homolog 2 (human)                            |
| RAB6, member RAS oncogene family                                           |
| proline-rich nuclear receptor coactivator 1                                |
| guanine nucleotide binding protein, alpha 12                               |
| guanine nucleotide binding protein, alpha 12                               |
| rogdi homolog (Drosophila)                                                 |
| RIKEN cDNA 5730427N09 gene                                                 |
| G elongation factor, mitochondrial 2                                       |
| apolipoprotein B editing complex 2                                         |
| apolipoprotein B editing complex 2                                         |
| apolipoprotein B editing complex 2                                         |
| RIKEN cDNA 1810003N24 gene                                                 |
| transforming, acidic coiled-coil containing protein 3                      |
| DNA segment, Chr 19, ERATO Doi 721, expressed                              |
| DNA segment, Chr 19, ERATO Doi 721, expressed                              |
| DNA segment, Chr 19, ERATO Doi 721, expressed                              |
| RIKEN cDNA 0610010O12 gene                                                 |
| solute carrier family 9 (sodium/hydrogen exchanger), isoform 3 regulator 1 |
| Isochorismatase domain containing 1                                        |
| diazepam binding inhibitor                                                 |
| exosome component 5                                                        |
| nucleolar protein family A, member 3                                       |
| mitochondrial ribosomal protein S10                                        |
| RIKEN cDNA 2610012O22 gene                                                 |
| tumor protein D52-like 2                                                   |
| RNA binding motif protein 8a                                               |
| CUG triplet repeat, RNA binding protein 2                                  |
| NADH dehydrogenase (ubiquinone) 1 alpha subcomplex, 12                     |
| Transcribed locus                                                          |
| lactamase, beta 2                                                          |
| cAMP-regulated phosphoprotein 19                                           |
| cAMP-regulated phosphoprotein 19                                           |
| DnaJ (Hsp40) homolog, subfamily A, member 1                                |
| casein kinase 1, delta                                                     |
| casein kinase 1, delta                                                     |
| casein kinase 1, delta                                                     |
| RIKEN cDNA 1810013D10 gene                                                 |
| RIKEN cDNA 6330407G11 gene                                                 |
| keratinocyte associated protein 2                                          |



|                                                                                                                                                                                                                                                                                                                                                                                                                  |
|------------------------------------------------------------------------------------------------------------------------------------------------------------------------------------------------------------------------------------------------------------------------------------------------------------------------------------------------------------------------------------------------------------------|
| keratinocyte associated protein 2                                                                                                                                                                                                                                                                                                                                                                                |
| nucleoredoxin                                                                                                                                                                                                                                                                                                                                                                                                    |
| LSM domain containing 1                                                                                                                                                                                                                                                                                                                                                                                          |
| hypothetical LOC432864 /// similar to Heterogeneous nuclear ribonucleoprotein A1 (Helix-destabilizing protein) (Single-strand binding protein) (hnRNP core protein A1) (HDP-1) (Topoisomerase-inhibitor suppressed) /// similar to Heterogeneous nuclear ribonucleoprotein A1 (Helix-destabilizing protein) (Single-strand binding protein) (hnRNP core protein A1) (HDP-1) (Topoisomerase-inhibitor suppressed) |
| arsenate resistance protein 2                                                                                                                                                                                                                                                                                                                                                                                    |
| proteasome (prosome, macropain) 26S subunit, non-ATPase, 14                                                                                                                                                                                                                                                                                                                                                      |
| cytoskeleton-associated protein 1                                                                                                                                                                                                                                                                                                                                                                                |
| TP53 regulated inhibitor of apoptosis 1                                                                                                                                                                                                                                                                                                                                                                          |
| Williams-Beuren syndrome chromosome region 1 homolog (human)                                                                                                                                                                                                                                                                                                                                                     |
| 3-hydroxyisobutyrate dehydrogenase                                                                                                                                                                                                                                                                                                                                                                               |
| similar to UDP-N-acetylhexosamine pyrophosphorylase                                                                                                                                                                                                                                                                                                                                                              |
| melanoma antigen                                                                                                                                                                                                                                                                                                                                                                                                 |
| developmental pluripotency-associated 3                                                                                                                                                                                                                                                                                                                                                                          |
| BCL2-like 13 (apoptosis facilitator)                                                                                                                                                                                                                                                                                                                                                                             |
| UBX domain containing 1                                                                                                                                                                                                                                                                                                                                                                                          |
| PDZ domain containing 1                                                                                                                                                                                                                                                                                                                                                                                          |
| PDZ domain containing 1                                                                                                                                                                                                                                                                                                                                                                                          |
| ---                                                                                                                                                                                                                                                                                                                                                                                                              |
| RNA binding motif protein 10                                                                                                                                                                                                                                                                                                                                                                                     |
| cell division cycle associated 8                                                                                                                                                                                                                                                                                                                                                                                 |
| mitochondrial ribosomal protein L44                                                                                                                                                                                                                                                                                                                                                                              |
| Purkinje cell protein 4-like 1                                                                                                                                                                                                                                                                                                                                                                                   |
| filamin, alpha                                                                                                                                                                                                                                                                                                                                                                                                   |
| RAB14, member RAS oncogene family                                                                                                                                                                                                                                                                                                                                                                                |
| influenza virus NS1A binding protein                                                                                                                                                                                                                                                                                                                                                                             |
| upstream binding protein 1                                                                                                                                                                                                                                                                                                                                                                                       |
| nuclear import 7 homolog (S. cerevisiae)                                                                                                                                                                                                                                                                                                                                                                         |
| NADH dehydrogenase (ubiquinone) 1 beta subcomplex, 5                                                                                                                                                                                                                                                                                                                                                             |
| transmembrane protein 11                                                                                                                                                                                                                                                                                                                                                                                         |
| suppression of tumorigenicity 13                                                                                                                                                                                                                                                                                                                                                                                 |
| suppression of tumorigenicity 13                                                                                                                                                                                                                                                                                                                                                                                 |
| RIKEN cDNA 6720456B07 gene                                                                                                                                                                                                                                                                                                                                                                                       |
| CD164 antigen                                                                                                                                                                                                                                                                                                                                                                                                    |
| guanosine diphosphate (GDP) dissociation inhibitor 1                                                                                                                                                                                                                                                                                                                                                             |
| polymerase (RNA) II (DNA directed) polypeptide D                                                                                                                                                                                                                                                                                                                                                                 |
| enoyl-Coenzyme A, hydratase/3-hydroxyacyl Coenzyme A dehydrogenase                                                                                                                                                                                                                                                                                                                                               |
| ectonucleotide pyrophosphatase/phosphodiesterase 2                                                                                                                                                                                                                                                                                                                                                               |
| histidyl tRNA synthetase 2                                                                                                                                                                                                                                                                                                                                                                                       |
| Ras-related associated with diabetes                                                                                                                                                                                                                                                                                                                                                                             |
| solute carrier family 39 (zinc transporter), member 4                                                                                                                                                                                                                                                                                                                                                            |
| membrane-spanning 4-domains, subfamily A, member 6B                                                                                                                                                                                                                                                                                                                                                              |
| RIKEN cDNA 5133401N09 gene                                                                                                                                                                                                                                                                                                                                                                                       |
| PX domain containing serine/threonine kinase                                                                                                                                                                                                                                                                                                                                                                     |
| flap structure specific endonuclease 1                                                                                                                                                                                                                                                                                                                                                                           |
| MAP/microtubule affinity-regulating kinase 4                                                                                                                                                                                                                                                                                                                                                                     |
| integrator complex subunit 3                                                                                                                                                                                                                                                                                                                                                                                     |
| ATP-binding cassette, sub-family F (GCN20), member 1                                                                                                                                                                                                                                                                                                                                                             |
| calpain 10                                                                                                                                                                                                                                                                                                                                                                                                       |
| polynucleotide kinase 3'- phosphatase                                                                                                                                                                                                                                                                                                                                                                            |
| dynein cytoplasmic 1 heavy chain 1                                                                                                                                                                                                                                                                                                                                                                               |
| hairy and enhancer of split 6 (Drosophila)                                                                                                                                                                                                                                                                                                                                                                       |
| T-cell immunoglobulin and mucin domain containing 2                                                                                                                                                                                                                                                                                                                                                              |
| cathepsin F                                                                                                                                                                                                                                                                                                                                                                                                      |

|                                                                                                                                                                                                                                                   |
|---------------------------------------------------------------------------------------------------------------------------------------------------------------------------------------------------------------------------------------------------|
| arginine/proline rich coiled-coil 1                                                                                                                                                                                                               |
| G protein-coupled receptor kinase-interactor 1                                                                                                                                                                                                    |
| squamous cell carcinoma antigen recognized by T-cells 3                                                                                                                                                                                           |
| PRA1 domain family 2                                                                                                                                                                                                                              |
| mitochondrial ribosomal protein S14                                                                                                                                                                                                               |
| bin3, bicoid-interacting 3, homolog (Drosophila)                                                                                                                                                                                                  |
| acidic (leucine-rich) nuclear phosphoprotein 32 family, member E                                                                                                                                                                                  |
| RIKEN cDNA 2610001J05 gene                                                                                                                                                                                                                        |
| latent transforming growth factor beta binding protein 4                                                                                                                                                                                          |
| FERM domain containing 6                                                                                                                                                                                                                          |
| cytochrome c oxidase subunit VIb polypeptide 2                                                                                                                                                                                                    |
| cytochrome c oxidase subunit VIb polypeptide 2                                                                                                                                                                                                    |
| disabled homolog 2 (Drosophila) interacting protein                                                                                                                                                                                               |
| general transcription factor III C 1                                                                                                                                                                                                              |
| alkB, alkylation repair homolog 5 (E. coli)                                                                                                                                                                                                       |
| RIKEN cDNA 1810008O21 gene                                                                                                                                                                                                                        |
| myocyte enhancer factor 2C                                                                                                                                                                                                                        |
| latrophilin 1                                                                                                                                                                                                                                     |
| transmembrane 9 superfamily member 1                                                                                                                                                                                                              |
| CKLF-like MARVEL transmembrane domain containing 3                                                                                                                                                                                                |
| PTK2 protein tyrosine kinase 2                                                                                                                                                                                                                    |
| ASF1 anti-silencing function 1 homolog B (S. cerevisiae)                                                                                                                                                                                          |
| coronin, actin binding protein, 2B                                                                                                                                                                                                                |
| LEM domain containing 2                                                                                                                                                                                                                           |
| A kinase (PRKA) anchor protein 1                                                                                                                                                                                                                  |
| A kinase (PRKA) anchor protein 1                                                                                                                                                                                                                  |
| A kinase (PRKA) anchor protein 1                                                                                                                                                                                                                  |
| SPRY domain containing 4                                                                                                                                                                                                                          |
| RIKEN cDNA 2310022K01 gene                                                                                                                                                                                                                        |
| DAZ associated protein 1                                                                                                                                                                                                                          |
| solute carrier family 25 (mitochondrial deoxynucleotide carrier), member 19                                                                                                                                                                       |
| RIKEN cDNA 2810025M15 gene                                                                                                                                                                                                                        |
| polycystic kidney disease 1 homolog                                                                                                                                                                                                               |
| coilin                                                                                                                                                                                                                                            |
| fructose biphosphatase 2                                                                                                                                                                                                                          |
| RIKEN cDNA 2700069A02 gene                                                                                                                                                                                                                        |
| t-complex protein 11                                                                                                                                                                                                                              |
| t-complex protein 11                                                                                                                                                                                                                              |
| solute carrier family 6 (neurotransmitter transporter, taurine), member 6                                                                                                                                                                         |
| glia maturation factor, gamma                                                                                                                                                                                                                     |
| N-acetylglucosamine kinase                                                                                                                                                                                                                        |
| zinc finger protein 703                                                                                                                                                                                                                           |
| DNA segment, Chr 1, Brigham & Women's Genetics 1363 expressed                                                                                                                                                                                     |
| cell division cycle 25 homolog A (S. cerevisiae)                                                                                                                                                                                                  |
| cell division cycle 25 homolog A (S. cerevisiae)                                                                                                                                                                                                  |
| DNA segment, Chr 14, ERATO Doi 500, expressed                                                                                                                                                                                                     |
| transmembrane protein 129                                                                                                                                                                                                                         |
| vaccinia related kinase 1                                                                                                                                                                                                                         |
| SWI/SNF related, matrix associated, actin dependent regulator of chromatin, subfamily a, member 5 /// RIKEN cDNA 9230115A19 gene /// similar to SWI/SNF related, matrix associated, actin dependent regulator of chromatin, subfamily a, member 5 |
| PRP19/PSO4 pre-mRNA processing factor 19 homolog (S. cerevisiae)                                                                                                                                                                                  |
| coenzyme Q5 homolog, methyltransferase (yeast)                                                                                                                                                                                                    |
| phosphoenolpyruvate carboxykinase 2 (mitochondrial)                                                                                                                                                                                               |
| RIKEN cDNA 1110039B18 gene                                                                                                                                                                                                                        |

|                                                                                                                          |
|--------------------------------------------------------------------------------------------------------------------------|
| Josephin domain containing 1                                                                                             |
| indolethylamine N-methyltransferase                                                                                      |
| Ts translation elongation factor, mitochondrial                                                                          |
| RIKEN cDNA 1500034J01 gene                                                                                               |
| ribosomal protein S6 kinase polypeptide 1                                                                                |
| core-binding factor, runt domain, alpha subunit 2, translocated to, 2 homolog (human)                                    |
| ubiquitin associated domain containing 1                                                                                 |
| immunity-related GTPase family, M                                                                                        |
| mitochondrial carrier triple repeat 1                                                                                    |
| ect2 oncogene                                                                                                            |
| RIKEN cDNA 3300001G02 gene                                                                                               |
| RIKEN cDNA 1600029D21 gene                                                                                               |
| nucleolar complex associated 4 homolog (S. cerevisiae)                                                                   |
| RAB3D, member RAS oncogene family                                                                                        |
| betaine-homocysteine methyltransferase 2                                                                                 |
| COMM domain containing 7 /// similar to COMM domain containing protein 7 /// similar to COMM domain-containing protein 7 |
| leucine-rich alpha-2-glycoprotein 1                                                                                      |
| SMC2 structural maintenance of chromosomes 2-like 1 (yeast)                                                              |
| isoleucine-tRNA synthetase 2, mitochondrial                                                                              |
| RIKEN cDNA 1500035H01 gene                                                                                               |
| ADP-ribosylation factor-like 6 interacting protein 5                                                                     |
| RIKEN cDNA 2210409B22 gene                                                                                               |
| epithelial membrane protein 1                                                                                            |
| mannose binding lectin (C)                                                                                               |
| DOM-3 homolog Z (C. elegans)                                                                                             |
| SNF related kinase                                                                                                       |
| solute carrier family 37 (glycerol-6-phosphate transporter), member 4                                                    |
| solute carrier family 22 (organic anion transporter), member 6                                                           |
| minichromosome maintenance deficient 3 (S. cerevisiae) associated protein                                                |
| NOL1/NOP2/Sun domain family, member 4                                                                                    |
| coagulation factor XIII, beta subunit                                                                                    |
| mannosidase, alpha, class 2C, member 1                                                                                   |
| ankyrin repeat and IBR domain containing 1                                                                               |
| ankyrin repeat and IBR domain containing 1                                                                               |
| apoptotic chromatin condensation inducer 1                                                                               |
| solute carrier family 39 (metal ion transporter), member 8                                                               |
| mitochondrial ribosomal protein L52                                                                                      |
| interferon gamma inducible protein 30                                                                                    |
| peptidylprolyl isomerase D (cyclophilin D)                                                                               |
| DEAH (Asp-Glu-Ala-His) box polypeptide 30                                                                                |
| microtubule-associated protein 1 light chain 3 alpha                                                                     |
| RIKEN cDNA 4933439C20 gene /// phosphatidylserine decarboxylase                                                          |
| aldehyde dehydrogenase family 7, member A1                                                                               |
| aldehyde dehydrogenase family 7, member A1                                                                               |
| multiple coagulation factor deficiency 2                                                                                 |
| H2A histone family, member Y                                                                                             |
| acyl-CoA synthetase long-chain family member 5                                                                           |
| guanine nucleotide binding protein, beta 1                                                                               |
| proteasome (prosome, macropain) subunit, alpha type 4                                                                    |
| ubiquitin-conjugating enzyme E2R 2                                                                                       |
| zinc finger protein 706                                                                                                  |
| zinc finger protein 706                                                                                                  |
| zinc finger protein 706                                                                                                  |

|                                                                                                                                                   |
|---------------------------------------------------------------------------------------------------------------------------------------------------|
| solute carrier family 6 (neurotransmitter transporter), member 18                                                                                 |
| CDC28 protein kinase 1b                                                                                                                           |
| keratin associated protein 3-3                                                                                                                    |
| keratin associated protein 3-1                                                                                                                    |
| armadillo repeat containing 1                                                                                                                     |
| solute carrier family 25 (mitochondrial carrier, peroxisomal membrane protein), member 17                                                         |
| tetraspanin 4                                                                                                                                     |
| pleiotrophin                                                                                                                                      |
| ---                                                                                                                                               |
| translocase of inner mitochondrial membrane 8 homolog b (yeast)                                                                                   |
| MAK10 homolog, amino-acid N-acetyltransferase subunit, (S. cerevisiae)                                                                            |
| ubiquitin-conjugating enzyme E2L 3                                                                                                                |
| DnaJ (Hsp40) homolog, subfamily B, member 3                                                                                                       |
| DnaJ (Hsp40) homolog, subfamily B, member 3                                                                                                       |
| calcium binding protein 39-like                                                                                                                   |
| ribosomal protein L19                                                                                                                             |
| zinc finger, MYND domain containing 11                                                                                                            |
| ---                                                                                                                                               |
| U2 small nuclear ribonucleoprotein auxiliary factor (U2AF) 1                                                                                      |
| serine (or cysteine) peptidase inhibitor, clade E, member 2                                                                                       |
| RIKEN cDNA 1200011O22 gene                                                                                                                        |
| brain glycogen phosphorylase                                                                                                                      |
| B-cell CLL/lymphoma 7B                                                                                                                            |
| heterogeneous nuclear ribonucleoprotein R                                                                                                         |
| thioredoxin domain containing 12 (endoplasmic reticulum)                                                                                          |
| protein kinase C, delta binding protein                                                                                                           |
| Notch gene homolog 1 (Drosophila)                                                                                                                 |
| four and a half LIM domains 1                                                                                                                     |
| four and a half LIM domains 1                                                                                                                     |
| four and a half LIM domains 1                                                                                                                     |
| dihydrolipoamide dehydrogenase                                                                                                                    |
| cyclin D2                                                                                                                                         |
| ADP-ribosylation factor-like 1                                                                                                                    |
| ring finger protein 2                                                                                                                             |
| lectin, galactoside-binding, soluble, 3 binding protein                                                                                           |
| malate dehydrogenase 1, NAD (soluble)                                                                                                             |
| fibroblast growth factor receptor 1                                                                                                               |
| monoglyceride lipase                                                                                                                              |
| monoglyceride lipase                                                                                                                              |
| RIKEN cDNA 2010107E04 gene                                                                                                                        |
| RIKEN cDNA 1810063B05 gene                                                                                                                        |
| hydroxysteroid (17-beta) dehydrogenase 4                                                                                                          |
| alpha glucosidase 2 alpha neutral subunit                                                                                                         |
| exosome component 4                                                                                                                               |
| farnesyl diphosphate farnesyl transferase 1                                                                                                       |
| secreted phosphoprotein 1                                                                                                                         |
| neuronatin                                                                                                                                        |
| argininosuccinate synthetase 1                                                                                                                    |
| amylase 2, pancreatic /// RIKEN cDNA 1810008N23 gene /// similar to Pancreatic alpha-amylase precursor (PA) (1,4-alpha-D-glucan glucanohydrolase) |
| amylase 2, pancreatic /// RIKEN cDNA 1810008N23 gene                                                                                              |
| glycerol kinase                                                                                                                                   |
| adaptor-related protein complex 3, mu 1 subunit                                                                                                   |
| CDC28 protein kinase regulatory subunit 2                                                                                                         |

|                                                                                                                                                                                                                                                                                                                                                                                                                                                                                                                                                                                                                                                                                                                                                                                                                                                                                                                                                                                                                                                                                                                                                                                                                                                                                                                                                                                                                                                                                                                                                                                                                                                                                                                                                                                                                                                                                                                                                                                                                                                                                                                                             |
|---------------------------------------------------------------------------------------------------------------------------------------------------------------------------------------------------------------------------------------------------------------------------------------------------------------------------------------------------------------------------------------------------------------------------------------------------------------------------------------------------------------------------------------------------------------------------------------------------------------------------------------------------------------------------------------------------------------------------------------------------------------------------------------------------------------------------------------------------------------------------------------------------------------------------------------------------------------------------------------------------------------------------------------------------------------------------------------------------------------------------------------------------------------------------------------------------------------------------------------------------------------------------------------------------------------------------------------------------------------------------------------------------------------------------------------------------------------------------------------------------------------------------------------------------------------------------------------------------------------------------------------------------------------------------------------------------------------------------------------------------------------------------------------------------------------------------------------------------------------------------------------------------------------------------------------------------------------------------------------------------------------------------------------------------------------------------------------------------------------------------------------------|
| cornichon homolog (Drosophila)                                                                                                                                                                                                                                                                                                                                                                                                                                                                                                                                                                                                                                                                                                                                                                                                                                                                                                                                                                                                                                                                                                                                                                                                                                                                                                                                                                                                                                                                                                                                                                                                                                                                                                                                                                                                                                                                                                                                                                                                                                                                                                              |
| annexin A8                                                                                                                                                                                                                                                                                                                                                                                                                                                                                                                                                                                                                                                                                                                                                                                                                                                                                                                                                                                                                                                                                                                                                                                                                                                                                                                                                                                                                                                                                                                                                                                                                                                                                                                                                                                                                                                                                                                                                                                                                                                                                                                                  |
| ubiquitin-conjugating enzyme E2I                                                                                                                                                                                                                                                                                                                                                                                                                                                                                                                                                                                                                                                                                                                                                                                                                                                                                                                                                                                                                                                                                                                                                                                                                                                                                                                                                                                                                                                                                                                                                                                                                                                                                                                                                                                                                                                                                                                                                                                                                                                                                                            |
| G0/G1 switch gene 2                                                                                                                                                                                                                                                                                                                                                                                                                                                                                                                                                                                                                                                                                                                                                                                                                                                                                                                                                                                                                                                                                                                                                                                                                                                                                                                                                                                                                                                                                                                                                                                                                                                                                                                                                                                                                                                                                                                                                                                                                                                                                                                         |
| protein phosphatase 5, catalytic subunit                                                                                                                                                                                                                                                                                                                                                                                                                                                                                                                                                                                                                                                                                                                                                                                                                                                                                                                                                                                                                                                                                                                                                                                                                                                                                                                                                                                                                                                                                                                                                                                                                                                                                                                                                                                                                                                                                                                                                                                                                                                                                                    |
| Fc receptor, IgG, alpha chain transporter                                                                                                                                                                                                                                                                                                                                                                                                                                                                                                                                                                                                                                                                                                                                                                                                                                                                                                                                                                                                                                                                                                                                                                                                                                                                                                                                                                                                                                                                                                                                                                                                                                                                                                                                                                                                                                                                                                                                                                                                                                                                                                   |
| tyrosine 3-monooxygenase/tryptophan 5-monooxygenase activation protein, eta polypeptide                                                                                                                                                                                                                                                                                                                                                                                                                                                                                                                                                                                                                                                                                                                                                                                                                                                                                                                                                                                                                                                                                                                                                                                                                                                                                                                                                                                                                                                                                                                                                                                                                                                                                                                                                                                                                                                                                                                                                                                                                                                     |
| WD and tetratricopeptide repeats 1                                                                                                                                                                                                                                                                                                                                                                                                                                                                                                                                                                                                                                                                                                                                                                                                                                                                                                                                                                                                                                                                                                                                                                                                                                                                                                                                                                                                                                                                                                                                                                                                                                                                                                                                                                                                                                                                                                                                                                                                                                                                                                          |
| glucuronidase, beta                                                                                                                                                                                                                                                                                                                                                                                                                                                                                                                                                                                                                                                                                                                                                                                                                                                                                                                                                                                                                                                                                                                                                                                                                                                                                                                                                                                                                                                                                                                                                                                                                                                                                                                                                                                                                                                                                                                                                                                                                                                                                                                         |
| protein arginine N-methyltransferase 3                                                                                                                                                                                                                                                                                                                                                                                                                                                                                                                                                                                                                                                                                                                                                                                                                                                                                                                                                                                                                                                                                                                                                                                                                                                                                                                                                                                                                                                                                                                                                                                                                                                                                                                                                                                                                                                                                                                                                                                                                                                                                                      |
| histocompatibility 2, D region locus 1                                                                                                                                                                                                                                                                                                                                                                                                                                                                                                                                                                                                                                                                                                                                                                                                                                                                                                                                                                                                                                                                                                                                                                                                                                                                                                                                                                                                                                                                                                                                                                                                                                                                                                                                                                                                                                                                                                                                                                                                                                                                                                      |
| histocompatibility 2, D region locus 1                                                                                                                                                                                                                                                                                                                                                                                                                                                                                                                                                                                                                                                                                                                                                                                                                                                                                                                                                                                                                                                                                                                                                                                                                                                                                                                                                                                                                                                                                                                                                                                                                                                                                                                                                                                                                                                                                                                                                                                                                                                                                                      |
| myosin, light polypeptide 6, alkali, smooth muscle and non-muscle /// similar to Myosin light polypeptide 6 (Myosin light chain alkali 3) (Myosin light chain 3) (MLC-3) (LC17) /// similar to myosin, light polypeptide 6, alkali, smooth muscle and non-muscle                                                                                                                                                                                                                                                                                                                                                                                                                                                                                                                                                                                                                                                                                                                                                                                                                                                                                                                                                                                                                                                                                                                                                                                                                                                                                                                                                                                                                                                                                                                                                                                                                                                                                                                                                                                                                                                                            |
| septin 2                                                                                                                                                                                                                                                                                                                                                                                                                                                                                                                                                                                                                                                                                                                                                                                                                                                                                                                                                                                                                                                                                                                                                                                                                                                                                                                                                                                                                                                                                                                                                                                                                                                                                                                                                                                                                                                                                                                                                                                                                                                                                                                                    |
| tyrosine 3-monooxygenase/tryptophan 5-monooxygenase activation protein, zeta polypeptide                                                                                                                                                                                                                                                                                                                                                                                                                                                                                                                                                                                                                                                                                                                                                                                                                                                                                                                                                                                                                                                                                                                                                                                                                                                                                                                                                                                                                                                                                                                                                                                                                                                                                                                                                                                                                                                                                                                                                                                                                                                    |
| claudin 1                                                                                                                                                                                                                                                                                                                                                                                                                                                                                                                                                                                                                                                                                                                                                                                                                                                                                                                                                                                                                                                                                                                                                                                                                                                                                                                                                                                                                                                                                                                                                                                                                                                                                                                                                                                                                                                                                                                                                                                                                                                                                                                                   |
| PRP39 pre-mRNA processing factor 39 homolog (yeast)                                                                                                                                                                                                                                                                                                                                                                                                                                                                                                                                                                                                                                                                                                                                                                                                                                                                                                                                                                                                                                                                                                                                                                                                                                                                                                                                                                                                                                                                                                                                                                                                                                                                                                                                                                                                                                                                                                                                                                                                                                                                                         |
| cofilin 2, muscle                                                                                                                                                                                                                                                                                                                                                                                                                                                                                                                                                                                                                                                                                                                                                                                                                                                                                                                                                                                                                                                                                                                                                                                                                                                                                                                                                                                                                                                                                                                                                                                                                                                                                                                                                                                                                                                                                                                                                                                                                                                                                                                           |
| histone deacetylase 7A                                                                                                                                                                                                                                                                                                                                                                                                                                                                                                                                                                                                                                                                                                                                                                                                                                                                                                                                                                                                                                                                                                                                                                                                                                                                                                                                                                                                                                                                                                                                                                                                                                                                                                                                                                                                                                                                                                                                                                                                                                                                                                                      |
| huntingtin interacting protein 1 related                                                                                                                                                                                                                                                                                                                                                                                                                                                                                                                                                                                                                                                                                                                                                                                                                                                                                                                                                                                                                                                                                                                                                                                                                                                                                                                                                                                                                                                                                                                                                                                                                                                                                                                                                                                                                                                                                                                                                                                                                                                                                                    |
| UDP-N-acetyl-alpha-D-galactosamine:polypeptide N-acetylgalactosaminyltransferase 2                                                                                                                                                                                                                                                                                                                                                                                                                                                                                                                                                                                                                                                                                                                                                                                                                                                                                                                                                                                                                                                                                                                                                                                                                                                                                                                                                                                                                                                                                                                                                                                                                                                                                                                                                                                                                                                                                                                                                                                                                                                          |
| cDNA sequence BC005624                                                                                                                                                                                                                                                                                                                                                                                                                                                                                                                                                                                                                                                                                                                                                                                                                                                                                                                                                                                                                                                                                                                                                                                                                                                                                                                                                                                                                                                                                                                                                                                                                                                                                                                                                                                                                                                                                                                                                                                                                                                                                                                      |
| chromobox homolog 7                                                                                                                                                                                                                                                                                                                                                                                                                                                                                                                                                                                                                                                                                                                                                                                                                                                                                                                                                                                                                                                                                                                                                                                                                                                                                                                                                                                                                                                                                                                                                                                                                                                                                                                                                                                                                                                                                                                                                                                                                                                                                                                         |
| acidic (leucine-rich) nuclear phosphoprotein 32 family, member E                                                                                                                                                                                                                                                                                                                                                                                                                                                                                                                                                                                                                                                                                                                                                                                                                                                                                                                                                                                                                                                                                                                                                                                                                                                                                                                                                                                                                                                                                                                                                                                                                                                                                                                                                                                                                                                                                                                                                                                                                                                                            |
| torsin family 2, member A                                                                                                                                                                                                                                                                                                                                                                                                                                                                                                                                                                                                                                                                                                                                                                                                                                                                                                                                                                                                                                                                                                                                                                                                                                                                                                                                                                                                                                                                                                                                                                                                                                                                                                                                                                                                                                                                                                                                                                                                                                                                                                                   |
| eukaryotic translation elongation factor 2                                                                                                                                                                                                                                                                                                                                                                                                                                                                                                                                                                                                                                                                                                                                                                                                                                                                                                                                                                                                                                                                                                                                                                                                                                                                                                                                                                                                                                                                                                                                                                                                                                                                                                                                                                                                                                                                                                                                                                                                                                                                                                  |
| prosaposin                                                                                                                                                                                                                                                                                                                                                                                                                                                                                                                                                                                                                                                                                                                                                                                                                                                                                                                                                                                                                                                                                                                                                                                                                                                                                                                                                                                                                                                                                                                                                                                                                                                                                                                                                                                                                                                                                                                                                                                                                                                                                                                                  |
| guanylate cyclase 2c                                                                                                                                                                                                                                                                                                                                                                                                                                                                                                                                                                                                                                                                                                                                                                                                                                                                                                                                                                                                                                                                                                                                                                                                                                                                                                                                                                                                                                                                                                                                                                                                                                                                                                                                                                                                                                                                                                                                                                                                                                                                                                                        |
| vav 1 oncogene                                                                                                                                                                                                                                                                                                                                                                                                                                                                                                                                                                                                                                                                                                                                                                                                                                                                                                                                                                                                                                                                                                                                                                                                                                                                                                                                                                                                                                                                                                                                                                                                                                                                                                                                                                                                                                                                                                                                                                                                                                                                                                                              |
| similar to Ig heavy chain V region 93G7 precursor                                                                                                                                                                                                                                                                                                                                                                                                                                                                                                                                                                                                                                                                                                                                                                                                                                                                                                                                                                                                                                                                                                                                                                                                                                                                                                                                                                                                                                                                                                                                                                                                                                                                                                                                                                                                                                                                                                                                                                                                                                                                                           |
| immunoglobulin heavy chain (V7183 family) /// immunoglobulin kappa chain variable 1 (V1) /// immunoglobulin kappa chain variable 1-117 /// Ig kappa chain /// immunoglobulin kappa chain variable 1-110                                                                                                                                                                                                                                                                                                                                                                                                                                                                                                                                                                                                                                                                                                                                                                                                                                                                                                                                                                                                                                                                                                                                                                                                                                                                                                                                                                                                                                                                                                                                                                                                                                                                                                                                                                                                                                                                                                                                     |
| transcription factor Dp 1 /// similar to Transcription factor Dp-1 (E2F dimerization partner 1) (DRTF1-polypeptide 1) /// similar to Transcription factor Dp-1 (E2F dimerization partner 1) (DRTF1-polypeptide 1) /// similar to Transcription factor Dp-1 (E2F dimerization partner 1) (DRTF1-polypeptide 1)                                                                                                                                                                                                                                                                                                                                                                                                                                                                                                                                                                                                                                                                                                                                                                                                                                                                                                                                                                                                                                                                                                                                                                                                                                                                                                                                                                                                                                                                                                                                                                                                                                                                                                                                                                                                                               |
| gene model 459, (NCBI) /// gene model 1419, (NCBI) /// gene model 1499, (NCBI) /// immunoglobulin kappa chain variable 4-61 /// immunoglobulin kappa chain variable 4-69 /// similar to Ig kappa chain V-IV region S107B precursor /// immunoglobulin kappa chain variable 4-59 /// similar to Ig kappa chain V-IV region S107B precursor                                                                                                                                                                                                                                                                                                                                                                                                                                                                                                                                                                                                                                                                                                                                                                                                                                                                                                                                                                                                                                                                                                                                                                                                                                                                                                                                                                                                                                                                                                                                                                                                                                                                                                                                                                                                   |
| gene model 1419, (NCBI) /// gene model 1499, (NCBI) /// gene model 1502, (NCBI) /// immunoglobulin kappa chain variable 4-61 /// immunoglobulin kappa chain variable 4-59 /// similar to Ig kappa chain V-IV region S107B precursor                                                                                                                                                                                                                                                                                                                                                                                                                                                                                                                                                                                                                                                                                                                                                                                                                                                                                                                                                                                                                                                                                                                                                                                                                                                                                                                                                                                                                                                                                                                                                                                                                                                                                                                                                                                                                                                                                                         |
| immunoglobulin heavy chain variable region /// similar to Ig heavy chain V-I region HG3 precursor /// similar to Ig heavy chain V-I region V35 precursor /// similar to Ig heavy chain V region 108A precursor /// similar to Ig heavy chain V-I region V35 precursor /// similar to Ig heavy chain V region AC38 205.12 /// similar to Ig heavy chain V region 108A precursor /// similar to Ig heavy chain V-I region HG3 precursor /// similar to Ig heavy chain V-I region V35 precursor /// similar to Ig heavy chain V region 108A precursor /// similar to Ig heavy chain V region 102 precursor /// similar to Ig heavy chain V region 108A precursor /// similar to Ig heavy chain V-I region HG3 precursor /// similar to Ig heavy chain V-I region V35 precursor /// similar to Ig heavy chain V region 108A precursor /// similar to Ig heavy chain V region 108A precursor /// similar to Ig heavy chain V region 108A precursor /// similar to Ig heavy chain V-I region V35 precursor /// similar to Ig heavy chain V-I region V35 precursor /// similar to Ig heavy chain V-I region V35 precursor /// similar to Ig heavy chain V-I region V35 precursor /// similar to Ig heavy chain V-I region V35 precursor /// similar to Ig heavy chain V-I region V35 precursor /// similar to Ig heavy chain V-I region V35 precursor /// similar to Ig heavy chain V region 108A precursor /// similar to Ig heavy chain V-I region V35 precursor /// similar to Ig heavy chain V-I region V35 precursor /// similar to Ig heavy chain V-I region V35 precursor /// similar to Ig heavy chain V region 108A precursor /// similar to Ig heavy chain V-I region V35 precursor /// similar to Ig heavy chain V region 93G7 precursor /// similar to Ig heavy chain V-I region V35 precursor /// similar to Ig heavy chain V region 93G7 precursor /// similar to Ig heavy chain V-I region V35 precursor /// similar to Ig heavy chain V-I region V35 precursor /// similar to Ig heavy chain V-I region V35 precursor /// similar to Ig heavy chain V region 93G7 precursor /// similar to Ig heavy chain V-I region V35 precursor |
| similar to Ig kappa chain V-IV region B17 precursor /// similar to Ig kappa chain V-IV region precursor /// similar to Ig kappa chain V-IV region precursor                                                                                                                                                                                                                                                                                                                                                                                                                                                                                                                                                                                                                                                                                                                                                                                                                                                                                                                                                                                                                                                                                                                                                                                                                                                                                                                                                                                                                                                                                                                                                                                                                                                                                                                                                                                                                                                                                                                                                                                 |
| Ig kappa active V-J region mRNA from PC-binding hybridoma HPCA97                                                                                                                                                                                                                                                                                                                                                                                                                                                                                                                                                                                                                                                                                                                                                                                                                                                                                                                                                                                                                                                                                                                                                                                                                                                                                                                                                                                                                                                                                                                                                                                                                                                                                                                                                                                                                                                                                                                                                                                                                                                                            |
| tumor necrosis factor receptor superfamily, member 8                                                                                                                                                                                                                                                                                                                                                                                                                                                                                                                                                                                                                                                                                                                                                                                                                                                                                                                                                                                                                                                                                                                                                                                                                                                                                                                                                                                                                                                                                                                                                                                                                                                                                                                                                                                                                                                                                                                                                                                                                                                                                        |
| integrin binding sialoprotein                                                                                                                                                                                                                                                                                                                                                                                                                                                                                                                                                                                                                                                                                                                                                                                                                                                                                                                                                                                                                                                                                                                                                                                                                                                                                                                                                                                                                                                                                                                                                                                                                                                                                                                                                                                                                                                                                                                                                                                                                                                                                                               |
| tyrosine kinase 2                                                                                                                                                                                                                                                                                                                                                                                                                                                                                                                                                                                                                                                                                                                                                                                                                                                                                                                                                                                                                                                                                                                                                                                                                                                                                                                                                                                                                                                                                                                                                                                                                                                                                                                                                                                                                                                                                                                                                                                                                                                                                                                           |
| expressed sequence A1324046 /// similar to Ig heavy chain V-I region V35 precursor /// similar to Ig heavy chain V-I region V35 precursor /// similar to Ig heavy chain V-I region V35 precursor /// similar to Ig heavy chain V region 108A precursor /// similar to Ig heavy chain V region 108A precursor                                                                                                                                                                                                                                                                                                                                                                                                                                                                                                                                                                                                                                                                                                                                                                                                                                                                                                                                                                                                                                                                                                                                                                                                                                                                                                                                                                                                                                                                                                                                                                                                                                                                                                                                                                                                                                |

|                                                                                                                                                                  |
|------------------------------------------------------------------------------------------------------------------------------------------------------------------|
| Immunoglobulin heavy chain complex                                                                                                                               |
| similar to Ig heavy chain V-I region V35 precursor /// similar to Ig heavy chain V-I region V35 precursor /// similar to Ig heavy chain V-I region V35 precursor |
| immunoglobulin heavy chain 6 (heavy chain of IgM)                                                                                                                |
| ---                                                                                                                                                              |
| crystallin, gamma F                                                                                                                                              |
| transient receptor potential cation channel, subfamily C, member 5                                                                                               |
| odd Oz/ten-m homolog 4 (Drosophila)                                                                                                                              |
| flightless I homolog (Drosophila)                                                                                                                                |
| flightless I homolog (Drosophila)                                                                                                                                |
| Transcribed locus, weakly similar to NP_570953.1 CAMP [Mus musculus]                                                                                             |
| plakophilin 1                                                                                                                                                    |
| expressed sequence AI450241                                                                                                                                      |
| gene model 428, (NCBI) /// hypothetical LOC623180 /// hypothetical LOC623197 /// hypothetical LOC623210 /// hypothetical LOC623219                               |
| ribosomal protein S16                                                                                                                                            |
| polymerase (DNA directed), kappa                                                                                                                                 |
| growth hormone releasing hormone receptor                                                                                                                        |
| maternal embryonic message 1                                                                                                                                     |
| distal-less homeobox 6, antisense                                                                                                                                |
| desmocollin 3                                                                                                                                                    |
| insulin I                                                                                                                                                        |
| insulin I                                                                                                                                                        |
| transcription factor 7-like 2, T-cell specific, HMG-box                                                                                                          |
| testis nuclear RNA binding protein                                                                                                                               |
| expressed sequence C76213                                                                                                                                        |
| expressed sequence C76213                                                                                                                                        |
| ---                                                                                                                                                              |
| cathepsin 7                                                                                                                                                      |
| T-cell leukemia, homeobox 2                                                                                                                                      |
| murinoglobulin, pseudogene 1 /// murinoglobulin 1 /// murinoglobulin 2 /// similar to murinoglobulin 1 /// similar to murinoglobulin 1                           |
| glutathione S-transferase, mu 3                                                                                                                                  |
| glutathione S-transferase, mu 3                                                                                                                                  |
| tumor necrosis factor receptor superfamily, member 9                                                                                                             |
| protein interacting with C kinase 1                                                                                                                              |
| RIKEN cDNA 1700023D09 gene                                                                                                                                       |
| papillary renal cell carcinoma (translocation-associated)                                                                                                        |
| ---                                                                                                                                                              |
| 16 days neonate thymus cDNA, RIKEN full-length enriched library, clone:A130082C12 product:unclassifiable, full insert sequence                                   |
| coagulation factor III                                                                                                                                           |
| ---                                                                                                                                                              |
| Ribosomal protein L27a                                                                                                                                           |
| 5-hydroxytryptamine (serotonin) receptor 2C                                                                                                                      |
| EST C78513                                                                                                                                                       |
| RIKEN cDNA 2310022L06 gene                                                                                                                                       |
| ribosomal protein L7                                                                                                                                             |
| ribosomal protein L7                                                                                                                                             |
| ribosomal protein L7                                                                                                                                             |
| seminal vesicle secretion 6                                                                                                                                      |
| plexin A1                                                                                                                                                        |
| Histocompatibility 2, K1, K region                                                                                                                               |
| breast carcinoma amplified sequence 2                                                                                                                            |
| Transcribed locus                                                                                                                                                |
| brix domain containing 1                                                                                                                                         |
| elongation factor RNA polymerase II 2                                                                                                                            |

|                                                                                                                                                                                                                                                                                                                                                                                                                                      |
|--------------------------------------------------------------------------------------------------------------------------------------------------------------------------------------------------------------------------------------------------------------------------------------------------------------------------------------------------------------------------------------------------------------------------------------|
| small nuclear RNA activating complex, polypeptide 3                                                                                                                                                                                                                                                                                                                                                                                  |
| MARCKS-like 1                                                                                                                                                                                                                                                                                                                                                                                                                        |
| hypothetical LOC541456                                                                                                                                                                                                                                                                                                                                                                                                               |
| ---                                                                                                                                                                                                                                                                                                                                                                                                                                  |
| interleukin 7                                                                                                                                                                                                                                                                                                                                                                                                                        |
| TBC1 domain family, member 24                                                                                                                                                                                                                                                                                                                                                                                                        |
| natriuretic peptide receptor 3                                                                                                                                                                                                                                                                                                                                                                                                       |
| phosphatidylinositol-3-phosphate/phosphatidylinositol 5-kinase, type III                                                                                                                                                                                                                                                                                                                                                             |
| RIKEN cDNA 2210010A19 gene                                                                                                                                                                                                                                                                                                                                                                                                           |
| ---                                                                                                                                                                                                                                                                                                                                                                                                                                  |
| transcription factor 15                                                                                                                                                                                                                                                                                                                                                                                                              |
| cytotoxic T-lymphocyte-associated protein 4                                                                                                                                                                                                                                                                                                                                                                                          |
| macrophage stimulating 1 receptor (c-met-related tyrosine kinase)                                                                                                                                                                                                                                                                                                                                                                    |
| immunoglobulin heavy chain (S107 family) /// similar to Ig heavy chain V region M167 precursor /// similar to Ig heavy chain V region M167 precursor                                                                                                                                                                                                                                                                                 |
| fibroblast growth factor 15                                                                                                                                                                                                                                                                                                                                                                                                          |
| signal sequence receptor, alpha                                                                                                                                                                                                                                                                                                                                                                                                      |
| chromobox homolog 2 (Drosophila Pc class)                                                                                                                                                                                                                                                                                                                                                                                            |
| cryptochrome 2 (photolyase-like)                                                                                                                                                                                                                                                                                                                                                                                                     |
| bone morphogenetic protein receptor, type 1B                                                                                                                                                                                                                                                                                                                                                                                         |
| glutamate receptor, ionotropic, NMDA2C (epsilon 3)                                                                                                                                                                                                                                                                                                                                                                                   |
| noggin                                                                                                                                                                                                                                                                                                                                                                                                                               |
| netrin 1                                                                                                                                                                                                                                                                                                                                                                                                                             |
| ectodermal-neural cortex 1                                                                                                                                                                                                                                                                                                                                                                                                           |
| ATP-binding cassette, sub-family A (ABC1), member 4                                                                                                                                                                                                                                                                                                                                                                                  |
| indoleamine-pyrrole 2,3 dioxygenase                                                                                                                                                                                                                                                                                                                                                                                                  |
| phosphodiesterase 6G, cGMP-specific, rod, gamma                                                                                                                                                                                                                                                                                                                                                                                      |
| adenosine A2b receptor                                                                                                                                                                                                                                                                                                                                                                                                               |
| thrombopoietin                                                                                                                                                                                                                                                                                                                                                                                                                       |
| thyrotropin releasing hormone receptor                                                                                                                                                                                                                                                                                                                                                                                               |
| G elongation factor, mitochondrial 2                                                                                                                                                                                                                                                                                                                                                                                                 |
| cDNA sequence BC034204                                                                                                                                                                                                                                                                                                                                                                                                               |
| cDNA sequence BC034204                                                                                                                                                                                                                                                                                                                                                                                                               |
| ubiquitin-conjugating enzyme E2O                                                                                                                                                                                                                                                                                                                                                                                                     |
| dual specificity phosphatase 16                                                                                                                                                                                                                                                                                                                                                                                                      |
| thyroid stimulating hormone, beta subunit                                                                                                                                                                                                                                                                                                                                                                                            |
| fibroblast growth factor 8                                                                                                                                                                                                                                                                                                                                                                                                           |
| zinc finger CCCH type containing 3                                                                                                                                                                                                                                                                                                                                                                                                   |
| Hippocalcin-like 4                                                                                                                                                                                                                                                                                                                                                                                                                   |
| homeo box A4                                                                                                                                                                                                                                                                                                                                                                                                                         |
| homeo box A4                                                                                                                                                                                                                                                                                                                                                                                                                         |
| homeo box A4                                                                                                                                                                                                                                                                                                                                                                                                                         |
| Solute carrier family 6 (neurotransmitter transporter, creatine), member 8                                                                                                                                                                                                                                                                                                                                                           |
| CD47 antigen (Rh-related antigen, integrin-associated signal transducer)                                                                                                                                                                                                                                                                                                                                                             |
| ribosomal protein SA                                                                                                                                                                                                                                                                                                                                                                                                                 |
| similar to glyceraldehyde-3-phosphate dehydrogenase /// cDNA sequence AK190093                                                                                                                                                                                                                                                                                                                                                       |
| RIKEN cDNA E130013N09 gene                                                                                                                                                                                                                                                                                                                                                                                                           |
| piccolo (presynaptic cytomatrix protein)                                                                                                                                                                                                                                                                                                                                                                                             |
| RIKEN cDNA G630024C07 gene                                                                                                                                                                                                                                                                                                                                                                                                           |
| dopamine receptor 4                                                                                                                                                                                                                                                                                                                                                                                                                  |
| protocadherin alpha 4 /// protocadherin alpha 6 /// protocadherin alpha 7 /// protocadherin alpha 5 /// protocadherin alpha 11 /// protocadherin alpha 10 /// protocadherin alpha 1 /// protocadherin alpha 9 /// protocadherin alpha cluster /// protocadherin alpha 3 /// protocadherin alpha 12 /// protocadherin alpha 2 /// protocadherin alpha 8 /// protocadherin alpha subfamily C, 1 /// protocadherin alpha subfamily C, 2 |
| seminal vesicle antigen                                                                                                                                                                                                                                                                                                                                                                                                              |
| peroxiredoxin 1                                                                                                                                                                                                                                                                                                                                                                                                                      |
| potassium large conductance calcium-activated channel, subfamily M, alpha member 1                                                                                                                                                                                                                                                                                                                                                   |

|                                                                                                                                                                                 |
|---------------------------------------------------------------------------------------------------------------------------------------------------------------------------------|
| microtubule-associated protein 2 /// hypothetical protein A730034C02                                                                                                            |
| killer cell lectin-like receptor subfamily A, member 13 /// killer cell lectin-like receptor, subfamily A, member 7 /// killer cell lectin-like receptor subfamily A, member 23 |
| killer cell lectin-like receptor subfamily A, member 13 /// killer cell lectin-like receptor, subfamily A, member 7 /// killer cell lectin-like receptor subfamily A, member 23 |
| neutrophil cytosolic factor 1                                                                                                                                                   |
| Ros1 proto-oncogene                                                                                                                                                             |
| Ros1 proto-oncogene                                                                                                                                                             |
| Ros1 proto-oncogene                                                                                                                                                             |
| keratin complex 1, acidic, gene 2                                                                                                                                               |
| desmocollin 2                                                                                                                                                                   |
| prostaglandin F receptor                                                                                                                                                        |
| DNA segment, Chr 6, Wayne State University 176, expressed                                                                                                                       |
| DNA segment, Chr 6, Wayne State University 176, expressed                                                                                                                       |
| plasminogen activator, urokinase                                                                                                                                                |
| CD34 antigen                                                                                                                                                                    |
| opioid receptor, mu 1                                                                                                                                                           |
| expressed sequence AA511254                                                                                                                                                     |
| dopamine receptor 2                                                                                                                                                             |
| NK2 transcription factor related, locus 5 (Drosophila)                                                                                                                          |
| ST3 beta-galactoside alpha-2,3-sialyltransferase 3                                                                                                                              |
| mast cell protease 8                                                                                                                                                            |
| ubiquitin specific peptidase 42                                                                                                                                                 |
| natural cytotoxicity triggering receptor 1                                                                                                                                      |
| defensin beta 2                                                                                                                                                                 |
| chemokine (C-C motif) ligand 17                                                                                                                                                 |
| arachidonate lipoxygenase 3                                                                                                                                                     |
| DNA segment, human D6S2654E                                                                                                                                                     |
| ankyrin repeat domain 2 (stretch responsive muscle)                                                                                                                             |
| solute carrier family 6 (neurotransmitter transporter, dopamine), member 3                                                                                                      |
| keratin complex 1, acidic, gene 12                                                                                                                                              |
| forkhead box H1                                                                                                                                                                 |
| laminin, alpha 3 /// similar to Laminin alpha-3 chain precursor (Nicein alpha subunit)                                                                                          |
| sema domain, seven thrombospondin repeats (type 1 and type 1-like), transmembrane domain (TM) and short cytoplasmic domain, (semaphorin) 5B                                     |
| neurogenin 2                                                                                                                                                                    |
| glutamate receptor, ionotropic, AMPA3 (alpha 3)                                                                                                                                 |
| sema domain, immunoglobulin domain (Ig), and GPI membrane anchor, (semaphorin) 7A                                                                                               |
| calcitonin receptor-like                                                                                                                                                        |
| cofactor required for Sp1 transcriptional activation, subunit 2                                                                                                                 |
| asparagine synthetase domain containing 1                                                                                                                                       |
| RIKEN cDNA 4930504E06 gene                                                                                                                                                      |
| Fas-activated serine/threonine kinase                                                                                                                                           |
| brix domain containing 5                                                                                                                                                        |
| membrane protein, palmitoylated                                                                                                                                                 |
| ubiquitin-fold modifier conjugating enzyme 1                                                                                                                                    |
| splicing factor 3b, subunit 1                                                                                                                                                   |
| euchromatic histone lysine N-methyltransferase 2                                                                                                                                |
| ADP-ribosylation factor GTPase activating protein 3                                                                                                                             |
| RAN binding protein 9                                                                                                                                                           |
| v-rel reticuloendotheliosis viral oncogene homolog A (avian)                                                                                                                    |
| keratin complex 1, acidic, gene 3                                                                                                                                               |
| RIKEN cDNA 2600011C06 gene                                                                                                                                                      |
| CDC42 small effector 1                                                                                                                                                          |
| sorting nexin 4                                                                                                                                                                 |
| glutathione S-transferase omega 1                                                                                                                                               |



|                                                                                                             |
|-------------------------------------------------------------------------------------------------------------|
| galactokinase 1                                                                                             |
| p21 (CDKN1A)-activated kinase 2                                                                             |
| p21 (CDKN1A)-activated kinase 2                                                                             |
| p21 (CDKN1A)-activated kinase 2                                                                             |
| nucleolar protein family A, member 2                                                                        |
| PERP, TP53 apoptosis effector                                                                               |
| Fc fragment of IgG binding protein                                                                          |
| Cd27 binding protein (Hindu God of destruction)                                                             |
| CDP-diacylglycerol--inositol 3-phosphatidyltransferase (phosphatidylinositol synthase)                      |
| platelet/endothelial cell adhesion molecule 1                                                               |
| CD97 antigen                                                                                                |
| phosphofructokinase, platelet                                                                               |
| phosphofructokinase, platelet                                                                               |
| retinoic acid receptor responder (tazarotene induced) 2                                                     |
| ring finger protein 7                                                                                       |
| small nucleolar RNA, C/D box 22                                                                             |
| sorting nexin 6                                                                                             |
| chromatin modifying protein 2A                                                                              |
| nuclear receptor coactivator 4 /// RIKEN cDNA 1110034E15 gene /// similar to nuclear receptor coactivator 4 |
| regulator of G-protein signaling 2                                                                          |
| WD repeat domain 5                                                                                          |
| cell division cycle 5-like (S. pombe)                                                                       |
| RNA binding motif protein, X chromosome                                                                     |
| RNA binding motif protein, X chromosome                                                                     |
| caveolin, caveolae protein 1                                                                                |
| PC4 and SFRS1 interacting protein 1                                                                         |
| zinc finger, DHHC domain containing 3                                                                       |
| inositol polyphosphate-5-phosphatase A                                                                      |
| inositol polyphosphate-5-phosphatase A                                                                      |
| nucleosome assembly protein 1-like 4                                                                        |
| transmembrane protein 111                                                                                   |
| transmembrane protein 111                                                                                   |
| DNA segment, Chr 8, ERATO Doi 354, expressed                                                                |
| RIKEN cDNA 2510049I19 gene                                                                                  |
| RIKEN cDNA 2510049I19 gene                                                                                  |
| RIKEN cDNA 2510049I19 gene                                                                                  |
| hydroxysteroid 11-beta dehydrogenase 1                                                                      |
| DnaJ (Hsp40) homolog, subfamily A, member 3                                                                 |
| electron transferring flavoprotein, dehydrogenase                                                           |
| ERO1-like (S. cerevisiae)                                                                                   |
| ---                                                                                                         |
| RIKEN cDNA 4432404C02 gene                                                                                  |
| RIKEN cDNA 1500032D16 gene                                                                                  |
| adhesion regulating molecule 1                                                                              |
| vacuolar protein sorting 29 (S. pombe)                                                                      |
| dihydrolipoamide S-succinyltransferase (E2 component of 2-oxo-glutarate complex)                            |
| Sec61 alpha 1 subunit (S. cerevisiae)                                                                       |
| mitochondrial ribosomal protein S11                                                                         |
| RIKEN cDNA 1810009M01 gene                                                                                  |
| sepiapterin reductase                                                                                       |
| apolipoprotein C-II                                                                                         |
| FGF receptor activating protein 1                                                                           |
| fatty acid binding protein 2, intestinal                                                                    |

|                                                                                                                                                                                                                   |
|-------------------------------------------------------------------------------------------------------------------------------------------------------------------------------------------------------------------|
| serum/glucocorticoid regulated kinase                                                                                                                                                                             |
| SAC3 domain containing 1                                                                                                                                                                                          |
| bromodomain containing 8                                                                                                                                                                                          |
| TATA box binding protein-like 1                                                                                                                                                                                   |
| valyl-tRNA synthetase 2                                                                                                                                                                                           |
| histone aminotransferase 1                                                                                                                                                                                        |
| histone aminotransferase 1                                                                                                                                                                                        |
| expressed sequence C78339                                                                                                                                                                                         |
| thioredoxin domain containing 9                                                                                                                                                                                   |
| upstream binding transcription factor, RNA polymerase I                                                                                                                                                           |
| tRNA splicing endonuclease 34 homolog (SEN34, <i>S. cerevisiae</i> )                                                                                                                                              |
| ARP3 actin-related protein 3 homolog (yeast)                                                                                                                                                                      |
| seven in absentia 2                                                                                                                                                                                               |
| LSM7 homolog, U6 small nuclear RNA associated ( <i>S. cerevisiae</i> )                                                                                                                                            |
| required for meiotic nuclear division 5 homolog A ( <i>S. cerevisiae</i> )                                                                                                                                        |
| stathmin 1                                                                                                                                                                                                        |
| stathmin 1 /// similar to Stathmin (Phosphoprotein p19) (pp19) (Oncoprotein 18) (Op18) (Leukemia-associated phosphoprotein p18) (pp17) (Prosolin) (Metablastin) (Pr22 protein) (Leukemia-associated gene protein) |
| RIKEN cDNA 0910001L09 gene                                                                                                                                                                                        |
| tetraspanin 3                                                                                                                                                                                                     |
| heat shock protein 9A                                                                                                                                                                                             |
| pleckstrin homology domain containing, family B (evectins) member 2                                                                                                                                               |
| RIKEN cDNA 5730494N06 gene                                                                                                                                                                                        |
| biogenesis of lysosome-related organelles complex-1, subunit 1                                                                                                                                                    |
| expressed sequence AA536743                                                                                                                                                                                       |
| PRP38 pre-mRNA processing factor 38 (yeast) domain containing B                                                                                                                                                   |
| keratin complex 2, basic, gene 7                                                                                                                                                                                  |
| agrin                                                                                                                                                                                                             |
| cytochrome b5 reductase 4                                                                                                                                                                                         |
| hect (homologous to the E6-AP (UBE3A) carboxyl terminus) domain and RCC1 (CHC1)-like domain (RLD) 1                                                                                                               |
| glucosamine                                                                                                                                                                                                       |
| casein kinase 1, epsilon                                                                                                                                                                                          |
| peroxisome proliferator activated receptor gamma                                                                                                                                                                  |
| ras homolog gene family, member G                                                                                                                                                                                 |
| ceroid-lipofuscinosis, neuronal 6                                                                                                                                                                                 |
| proteasome (prosome, macropain) 26S subunit, non-ATPase, 9                                                                                                                                                        |
| CD151 antigen                                                                                                                                                                                                     |
| CD151 antigen                                                                                                                                                                                                     |
| CD151 antigen                                                                                                                                                                                                     |
| RIKEN cDNA 2010111I01 gene                                                                                                                                                                                        |
| UDP-N-acetyl-alpha-D-galactosamine:polypeptide N-acetylgalactosaminyltransferase 1                                                                                                                                |
| RIKEN cDNA 4121402D02 gene                                                                                                                                                                                        |
| zinc finger protein 746                                                                                                                                                                                           |
| Kruppel-like factor 5                                                                                                                                                                                             |
| thioredoxin domain containing 1                                                                                                                                                                                   |
| chorionic somatomammotropin hormone 1                                                                                                                                                                             |
| calpain 6                                                                                                                                                                                                         |
| calpain 6                                                                                                                                                                                                         |
| calpain 6                                                                                                                                                                                                         |
| T-cell receptor alpha chain /// RIKEN cDNA A430107P09 gene                                                                                                                                                        |
| T-cell receptor alpha chain /// RIKEN cDNA A130082M07 gene /// RIKEN cDNA A430107P09 gene                                                                                                                         |
| prolactin-like protein F                                                                                                                                                                                          |
| ---                                                                                                                                                                                                               |
| retinoblastoma 1                                                                                                                                                                                                  |

|                                                                                                                     |
|---------------------------------------------------------------------------------------------------------------------|
| fibrinogen-like protein 2                                                                                           |
| xanthine dehydrogenase                                                                                              |
| tuberous sclerosis 2                                                                                                |
| tuberous sclerosis 2                                                                                                |
| tuberous sclerosis 2                                                                                                |
| tyrosinase-related protein 1                                                                                        |
| tyrosinase-related protein 1                                                                                        |
| tyrosinase-related protein 1                                                                                        |
| solute carrier family 27 (fatty acid transporter), member 4                                                         |
| protein kinase C binding protein 1                                                                                  |
| ubiquitin specific peptidase 22                                                                                     |
| synaptojanin 2                                                                                                      |
| signal-induced proliferation associated gene 1                                                                      |
| FK506 binding protein 11                                                                                            |
| phospholipase A2, group VI                                                                                          |
| nuclear receptor coactivator 5                                                                                      |
| Plexin D1                                                                                                           |
| nuclear receptor subfamily 1, group H, member 4                                                                     |
| antigen p97 (melanoma associated) identified by monoclonal antibodies 133.2 and 96.5                                |
| phosphorylase kinase, gamma 2 (testis)                                                                              |
| ring finger protein 103                                                                                             |
| T-cell acute lymphocytic leukemia 1                                                                                 |
| zinc finger protein, multitype 1                                                                                    |
| nuclear factor of activated T-cells, cytoplasmic, calcineurin-dependent 3                                           |
| kinectin 1                                                                                                          |
| netrin 1                                                                                                            |
| protein phosphatase 1, regulatory (inhibitor) subunit 7                                                             |
| lymphotoxin B receptor                                                                                              |
| EMI domain containing 2                                                                                             |
| syntaxin binding protein 1                                                                                          |
| kinesin 2                                                                                                           |
| kinesin 2                                                                                                           |
| ectonucleoside triphosphate diphosphohydrolase 2                                                                    |
| insulin-like growth factor binding protein, acid labile subunit                                                     |
| myeloid ecotropic viral integration site-related gene 1                                                             |
| protein phosphatase 3, catalytic subunit, beta isoform                                                              |
| myosin, heavy polypeptide 11, smooth muscle                                                                         |
| v-Ki-ras2 Kirsten rat sarcoma viral oncogene homolog                                                                |
| Smg-5 homolog, nonsense mediated mRNA decay factor (C. elegans)                                                     |
| uroporphyrinogen III synthase                                                                                       |
| transcription factor 7, T-cell specific                                                                             |
| transcription factor 7, T-cell specific                                                                             |
| poly (A) polymerase alpha                                                                                           |
| secreted frizzled-related sequence protein 1                                                                        |
| atrophin 1                                                                                                          |
| mucin 13, epithelial transmembrane                                                                                  |
| Rho guanine nucleotide exchange factor (GEF) 1                                                                      |
| interferon regulatory factor 8                                                                                      |
| leukocyte immunoglobulin-like receptor, subfamily B (with TM and ITIM domains), member 3 /// hypothetical LOC619608 |
| protein kinase inhibitor, alpha                                                                                     |
| protein kinase inhibitor, alpha                                                                                     |
| polymerase (DNA directed), alpha 2                                                                                  |
| ribosomal protein S6 kinase, polypeptide 2                                                                          |

|                                                                                          |
|------------------------------------------------------------------------------------------|
| chemokine (C-X3-C motif) ligand 1                                                        |
| nuclear factor, erythroid derived 2                                                      |
| gamma-aminobutyric acid (GABA-B) receptor, 1                                             |
| DNA segment, Chr 15, ERATO Doi 621, expressed                                            |
| inter-alpha trypsin inhibitor, heavy chain 1                                             |
| secretory carrier membrane protein 3                                                     |
| DNA segment, Chr 3, Wayne State University 161, expressed                                |
| pelota homolog (Drosophila)                                                              |
| protein C receptor, endothelial                                                          |
| transforming growth factor beta 1 induced transcript 1                                   |
| developmentally regulated GTP binding protein 1                                          |
| polymerase (RNA) I polypeptide E                                                         |
| proprotein convertase subtilisin/kexin type 7                                            |
| proliferin related protein                                                               |
| nuclear transcription factor-Y beta                                                      |
| ecotropic viral integration site 2a                                                      |
| ecotropic viral integration site 2a                                                      |
| procollagen, type IX, alpha 2                                                            |
| twist gene homolog 1 (Drosophila)                                                        |
| RIKEN cDNA 3110056O03 gene                                                               |
| tripartite motif protein 30                                                              |
| Bcl-2-related ovarian killer protein                                                     |
| zinc finger protein 35                                                                   |
| RIKEN cDNA 1100001H23 gene                                                               |
| histocompatibility 2, class II, locus Mb1                                                |
| histocompatibility 2, class II, locus Mb1                                                |
| MARVEL (membrane-associating) domain containing 1                                        |
| hepatitis B virus x interacting protein                                                  |
| high mobility group box 3                                                                |
| RIKEN cDNA 2410015M20 gene                                                               |
| transcription factor E2a                                                                 |
| ribonuclease, RNase A family, 1 (pancreatic)                                             |
| serine carboxypeptidase 1                                                                |
| disabled homolog 2 (Drosophila)                                                          |
| disabled homolog 2 (Drosophila)                                                          |
| RIKEN cDNA 5730410I19 gene                                                               |
| FUS interacting protein (serine-arginine rich) 1 /// hypothetical LOC432730              |
| RIKEN cDNA 1300018I05 gene                                                               |
| resistance to inhibitors of cholinesterase 8 homolog (C. elegans)                        |
| blocked early in transport 1 homolog (S. cerevisiae)-like                                |
| tyrosine 3-monooxygenase/tryptophan 5-monooxygenase activation protein, beta polypeptide |
| extracellular matrix protein 1                                                           |
| bladder cancer associated protein homolog (human)                                        |
| pleckstrin homology-like domain, family A, member 3                                      |
| ring finger protein 166                                                                  |
| lamin A                                                                                  |
| lamin A                                                                                  |
| nudix (nucleoside diphosphate linked moiety X)-type motif 16-like 1                      |
| glycosylation dependent cell adhesion molecule 1                                         |
| angio-associated migratory protein                                                       |
| ORM1-like 3 (S. cerevisiae)                                                              |
| bromodomain containing 2                                                                 |
| cyclin-dependent kinase inhibitor 1A (P21)                                               |

|                                                                                                                                                                                                                                                                                          |
|------------------------------------------------------------------------------------------------------------------------------------------------------------------------------------------------------------------------------------------------------------------------------------------|
| RIKEN cDNA 2400003N08 gene                                                                                                                                                                                                                                                               |
| RIKEN cDNA 2400003N08 gene                                                                                                                                                                                                                                                               |
| deoxycytidine kinase                                                                                                                                                                                                                                                                     |
| deoxycytidine kinase                                                                                                                                                                                                                                                                     |
| cut-like 1 (Drosophila)                                                                                                                                                                                                                                                                  |
| RIKEN cDNA G431001I09 gene                                                                                                                                                                                                                                                               |
| endoplasmic reticulum protein 29                                                                                                                                                                                                                                                         |
| small nuclear ribonucleoprotein D3                                                                                                                                                                                                                                                       |
| anterior pharynx defective 1a homolog (C. elegans)                                                                                                                                                                                                                                       |
| carbonic anhydrase 14                                                                                                                                                                                                                                                                    |
| RNA polymerase 1-3                                                                                                                                                                                                                                                                       |
| RNA polymerase 1-3                                                                                                                                                                                                                                                                       |
| Kruppel-like factor 6                                                                                                                                                                                                                                                                    |
| ADP-ribosylation factor-like 2 binding protein                                                                                                                                                                                                                                           |
| Cytotoxic granule-associated RNA binding protein 1                                                                                                                                                                                                                                       |
| ribosomal protein S28                                                                                                                                                                                                                                                                    |
| TANK-binding kinase 1                                                                                                                                                                                                                                                                    |
| CD14 antigen                                                                                                                                                                                                                                                                             |
| RIKEN cDNA 1190005P17 gene                                                                                                                                                                                                                                                               |
| KRR1, small subunit (SSU) processome component, homolog (yeast)                                                                                                                                                                                                                          |
| placenta-specific 8                                                                                                                                                                                                                                                                      |
| autocrine motility factor receptor                                                                                                                                                                                                                                                       |
| component of oligomeric golgi complex 8                                                                                                                                                                                                                                                  |
| component of oligomeric golgi complex 8                                                                                                                                                                                                                                                  |
| carbonic anhydrase 1                                                                                                                                                                                                                                                                     |
| nudix (nucleoside diphosphate linked moiety X)-type motif 9                                                                                                                                                                                                                              |
| general transcription factor II A, 2                                                                                                                                                                                                                                                     |
| pyruvate dehydrogenase E1 alpha 1                                                                                                                                                                                                                                                        |
| ATPase, H+ transporting, lysosomal V0 subunit B                                                                                                                                                                                                                                          |
| translocase of inner mitochondrial membrane 44                                                                                                                                                                                                                                           |
| coronin, actin binding protein 1C                                                                                                                                                                                                                                                        |
| cellular retinoic acid binding protein I                                                                                                                                                                                                                                                 |
| mitochondrial ribosomal protein L55                                                                                                                                                                                                                                                      |
| transformed mouse 3T3 cell double minute 2                                                                                                                                                                                                                                               |
| heat shock protein 110                                                                                                                                                                                                                                                                   |
| leucine aminopeptidase 3                                                                                                                                                                                                                                                                 |
| proteasome (prosome, macropain) subunit, beta type 1                                                                                                                                                                                                                                     |
| Niemann Pick type C1                                                                                                                                                                                                                                                                     |
| hemopexin                                                                                                                                                                                                                                                                                |
| NADH dehydrogenase (ubiquinone) 1 alpha subcomplex, 1                                                                                                                                                                                                                                    |
| NADH dehydrogenase (ubiquinone) 1 alpha subcomplex, 1                                                                                                                                                                                                                                    |
| ribosomal protein L30 /// similar to ribosomal protein L30 |
| mitochondrial ribosomal protein L27                                                                                                                                                                                                                                                      |
| farnesyltransferase, CAAX box, alpha                                                                                                                                                                                                                                                     |
| LIM domain only 4                                                                                                                                                                                                                                                                        |
| aminoadipate aminotransferase                                                                                                                                                                                                                                                            |
| RIKEN cDNA 0610011F06 gene                                                                                                                                                                                                                                                               |
| TM2 domain containing 3                                                                                                                                                                                                                                                                  |
| ATPase, Ca++ transporting, cardiac muscle, fast twitch 1                                                                                                                                                                                                                                 |
| capping protein (actin filament) muscle Z-line, alpha 2                                                                                                                                                                                                                                  |
| ATP synthase, H+ transporting, mitochondrial F0 complex, subunit F                                                                                                                                                                                                                       |
| thymosin, beta 10                                                                                                                                                                                                                                                                        |
| thioredoxin 2                                                                                                                                                                                                                                                                            |

|                                                                                                                                              |
|----------------------------------------------------------------------------------------------------------------------------------------------|
| crystallin, zeta                                                                                                                             |
| cytochrome c, somatic /// similar to Cytochrome c, somatic /// similar to Cytochrome c, somatic                                              |
| calbindin-28K                                                                                                                                |
| RIKEN cDNA 2610101N10 gene                                                                                                                   |
| OTU domain containing 6B                                                                                                                     |
| spermine synthase /// similar to Spermine synthase (Spermidine aminopropyltransferase) (SPMSY)                                               |
| carbonic anhydrase 5a, mitochondrial                                                                                                         |
| ribosomal protein L7-like 1                                                                                                                  |
| voltage-dependent anion channel 1                                                                                                            |
| cadherin 1                                                                                                                                   |
| eukaryotic translation initiation factor 5B                                                                                                  |
| eukaryotic translation initiation factor 5B                                                                                                  |
| fucosyltransferase 8                                                                                                                         |
| tetraspanin 31                                                                                                                               |
| nucleoporin 88                                                                                                                               |
| ubiquitin specific peptidase 5 (isopeptidase T)                                                                                              |
| RIKEN cDNA 1110033J19 gene                                                                                                                   |
| RIKEN cDNA 1110033J19 gene                                                                                                                   |
| RAB11B, member RAS oncogene family                                                                                                           |
| catenin (cadherin associated protein), delta 1                                                                                               |
| catenin (cadherin associated protein), delta 1                                                                                               |
| chaperonin subunit 3 (gamma)                                                                                                                 |
| general transcription factor IIIC, polypeptide 2, beta                                                                                       |
| polymerase (DNA directed), delta 2, regulatory subunit                                                                                       |
| ribosomal protein L7a                                                                                                                        |
| frizzled homolog 3 (Drosophila)                                                                                                              |
| interleukin 12 receptor, beta 1                                                                                                              |
| casein kinase II, alpha 2, polypeptide                                                                                                       |
| hypothetical protein LOC637741                                                                                                               |
| CCR4 carbon catabolite repression 4-like (S. cerevisiae) /// SH3-domain GRB2-like (endophilin) interacting protein 1 /// Gag /// gag protein |
| growth factor receptor bound protein 2-associated protein 2                                                                                  |
| zinc finger protein, subfamily 1A, 4 (Eos)                                                                                                   |
| sprouty homolog 4 (Drosophila)                                                                                                               |
| insulin receptor-related receptor                                                                                                            |
| matrix metallopeptidase 16                                                                                                                   |
| hypothetical protein, P4(21)n gene                                                                                                           |
| inducible T-cell co-stimulator                                                                                                               |
| 5'-3' exoribonuclease 1                                                                                                                      |
| histocompatibility 2, T region locus 18                                                                                                      |
| similar to zinc finger protein 146                                                                                                           |
| lymphocyte antigen 6 complex, locus G6D                                                                                                      |
| dipeptidylpeptidase 6                                                                                                                        |
| kallikrein 4 (prostase, enamel matrix, prostate)                                                                                             |
| E74-like factor 4 (ets domain transcription factor)                                                                                          |
| phospholipase C, gamma 1                                                                                                                     |
| UDP-Gal:betaGal beta 1,3-galactosyltransferase, polypeptide 6                                                                                |
| G substrate                                                                                                                                  |
| G substrate                                                                                                                                  |
| ---                                                                                                                                          |
| cytochrome P450, family 2, subfamily c, polypeptide 39                                                                                       |
| tubby like protein 1                                                                                                                         |
| leucine rich repeat containing G protein coupled receptor 5                                                                                  |
| dihydropyrimidinase-like 2                                                                                                                   |

|                                                                                                       |
|-------------------------------------------------------------------------------------------------------|
| schlafen 3 /// schlafen 4                                                                             |
| calcium channel, voltage-dependent, alpha2/delta subunit 3                                            |
| tectorin beta                                                                                         |
| sodium channel, voltage-gated, type X, alpha                                                          |
| centrosomal protein 110                                                                               |
| toll-like receptor 6                                                                                  |
| forkhead box M1                                                                                       |
| forkhead box M1                                                                                       |
| RAS guanyl releasing protein 1                                                                        |
| myosin, heavy polypeptide 1, skeletal muscle, adult                                                   |
| chemokine binding protein 2                                                                           |
| zinc and ring finger 4                                                                                |
| polyamine modulated factor 1 binding protein 1                                                        |
| R-spondin homolog (Xenopus laevis)                                                                    |
| odd Oz/ten-m homolog 4 (Drosophila)                                                                   |
| odd Oz/ten-m homolog 4 (Drosophila)                                                                   |
| tectorin alpha                                                                                        |
| cysteine-rich hydrophobic domain 1                                                                    |
| paired-like homeobox 2b                                                                               |
| tumor necrosis factor (ligand) superfamily, member 7                                                  |
| desmoglein 2                                                                                          |
| cytochrome P450, family 26, subfamily a, polypeptide 1                                                |
| olfactory receptor 90                                                                                 |
| solute carrier family 22 (organic cation transporter), member 5                                       |
| chemokine (C-C motif) receptor 9                                                                      |
| forkhead box A3                                                                                       |
| expressed sequence AA517545                                                                           |
| coiled-coil domain containing 96                                                                      |
| Ubiquitin specific petidase 45                                                                        |
| thyroid stimulating hormone receptor                                                                  |
| 6-phosphofructo-2-kinase/fructose-2,6-biphosphatase 2                                                 |
| zinc finger protein of the cerebellum 3                                                               |
| procollagen, type III, alpha 1                                                                        |
| potassium inwardly-rectifying channel, subfamily J, member 9                                          |
| ribosomal protein S18                                                                                 |
| cytotoxic and regulatory T cell molecule                                                              |
| replication factor C 1                                                                                |
| replication factor C 1                                                                                |
| NK1 transcription factor related, locus 2 (Drosophila)                                                |
| engrailed 2                                                                                           |
| synaptotagmin XI                                                                                      |
| expressed sequence AA407331                                                                           |
| MYB binding protein (P160) 1a                                                                         |
| ribosomal protein 10                                                                                  |
| zinc finger protein 2, Y linked                                                                       |
| similar to RIKEN cDNA 6030426L16 /// similar to gonadotropin inducible ovarian transcription factor 1 |
| expressed sequence AA536748                                                                           |
| leucine rich repeat containing 54                                                                     |
| caudal type homeo box 4                                                                               |
| frizzled homolog 3 (Drosophila)                                                                       |
| interleukin 6 signal transducer                                                                       |
| somatostatin receptor 2                                                                               |
| somatostatin receptor 2                                                                               |

|                                                                                                                                                                  |
|------------------------------------------------------------------------------------------------------------------------------------------------------------------|
| somatostatin receptor 2                                                                                                                                          |
| cytochrome P450, family 4, subfamily a, polypeptide 10 /// cDNA sequence BC013476                                                                                |
| pre T-cell antigen receptor alpha                                                                                                                                |
| G protein-coupled receptor 133 /// similar to G protein-coupled receptor 133                                                                                     |
| DNA segment, Chr 16, Wayne State University 65, expressed                                                                                                        |
| EST AA545190                                                                                                                                                     |
| RIKEN cDNA 4933416E03 gene                                                                                                                                       |
| calcium channel, voltage-dependent, N type, alpha 1B subunit                                                                                                     |
| adenylate cyclase activating polypeptide 1 receptor 1                                                                                                            |
| adenylate cyclase activating polypeptide 1 receptor 1                                                                                                            |
| neurexophilin 2                                                                                                                                                  |
| potassium voltage-gated channel, Shal-related family, member 2                                                                                                   |
| nitric oxide synthase 1, neuronal                                                                                                                                |
| integrin alpha V                                                                                                                                                 |
| homeo box D3                                                                                                                                                     |
| protein kinase, cGMP-dependent, type II                                                                                                                          |
| RIKEN cDNA 2610028J07 gene                                                                                                                                       |
| uroplakin 2                                                                                                                                                      |
| core-binding factor, runt domain, alpha subunit 2, translocated to, 2 homolog (human)                                                                            |
| aldehyde dehydrogenase family 1, subfamily A3                                                                                                                    |
| membrane-spanning 4-domains, subfamily A, member 4C                                                                                                              |
| interleukin 5                                                                                                                                                    |
| vasoactive intestinal peptide receptor 2                                                                                                                         |
| Eph receptor A5                                                                                                                                                  |
| ring finger and WD repeat domain 2 /// similar to constitutive photomorphogenic protein 1                                                                        |
| potassium voltage-gated channel, subfamily H (eag-related), member 1                                                                                             |
| N-acetyltransferase 12                                                                                                                                           |
| proline-rich protein MP5 /// proline rich protein MP4 /// similar to proline rich protein MP4 /// cDNA sequence BC061494 /// similar to proline rich protein MP4 |
| proline-rich protein MP5                                                                                                                                         |
| PTK6 protein tyrosine kinase 6                                                                                                                                   |
| protein tyrosine phosphatase, non-receptor type 14                                                                                                               |
| calcium channel, voltage-dependent, L type, alpha 1C subunit                                                                                                     |
| bradykinin receptor, beta 2                                                                                                                                      |
| Mitochondrial translational release factor 1-like                                                                                                                |
| Cytokine receptor-like factor 1                                                                                                                                  |
| inosine 5'-phosphate dehydrogenase 1                                                                                                                             |
| kallikrein 1-related peptidase b11                                                                                                                               |
| lymphocyte-activation gene 3                                                                                                                                     |
| distal-less homeobox 1                                                                                                                                           |
| corticotropin releasing hormone receptor 2                                                                                                                       |
| basic leucine zipper nuclear factor 1                                                                                                                            |
| apolipoprotein B editing complex 1                                                                                                                               |
| SoxLZ/Sox6 leucine zipper binding protein in testis                                                                                                              |
| hydroxysteroid dehydrogenase-3, delta<5>-3-beta                                                                                                                  |
| microtubule-actin crosslinking factor 1                                                                                                                          |
| guanine nucleotide binding protein, related sequence 1                                                                                                           |
| U2 small nuclear ribonucleoprotein auxiliary factor (U2AF) 2                                                                                                     |
| serine (or cysteine) peptidase inhibitor, clade B, member 9                                                                                                      |
| chemokine (C-C motif) ligand 5                                                                                                                                   |
| ephrin B1                                                                                                                                                        |
| hematopoietically expressed homeobox                                                                                                                             |
| myosin IB                                                                                                                                                        |
| interferon inducible GTPase 2                                                                                                                                    |



|                                                                                                                                                                                                                                                                                       |
|---------------------------------------------------------------------------------------------------------------------------------------------------------------------------------------------------------------------------------------------------------------------------------------|
| PDZ and LIM domain 7                                                                                                                                                                                                                                                                  |
| zinc finger protein 42                                                                                                                                                                                                                                                                |
| cytokine receptor-like factor 3                                                                                                                                                                                                                                                       |
| Tnf receptor-associated factor 2                                                                                                                                                                                                                                                      |
| myxovirus (influenza virus) resistance 1                                                                                                                                                                                                                                              |
| dishevelled, dsh homolog 1 (Drosophila)                                                                                                                                                                                                                                               |
| mesenchyme homeobox 1                                                                                                                                                                                                                                                                 |
| inositol (myo)-1(or 4)-monophosphatase 2                                                                                                                                                                                                                                              |
| Interleukin 17D                                                                                                                                                                                                                                                                       |
| gap junction membrane channel protein beta 2                                                                                                                                                                                                                                          |
| protein tyrosine phosphatase, non-receptor type 13                                                                                                                                                                                                                                    |
| palmitoyl-protein thioesterase 2                                                                                                                                                                                                                                                      |
| nuclear factor of kappa light chain gene enhancer in B-cells 1, p105                                                                                                                                                                                                                  |
| spastin                                                                                                                                                                                                                                                                               |
| lysophospholipase 2                                                                                                                                                                                                                                                                   |
| surfeit gene 5                                                                                                                                                                                                                                                                        |
| dual specificity phosphatase 12                                                                                                                                                                                                                                                       |
| cDNA sequence X99384                                                                                                                                                                                                                                                                  |
| BH3 interacting domain death agonist                                                                                                                                                                                                                                                  |
| Rho guanine nucleotide exchange factor (GEF7)                                                                                                                                                                                                                                         |
| adenylosuccinate synthetase like 1                                                                                                                                                                                                                                                    |
| caspase 3                                                                                                                                                                                                                                                                             |
| caspase 3                                                                                                                                                                                                                                                                             |
| histocompatibility 2, Q region locus 7 /// histocompatibility 2, Q region locus 8 /// similar to H-2 class I histocompatibility antigen, Q7 alpha chain precursor (QA-2 antigen) /// region containing histocompatibility 2, Q region locus 9; histocompatibility 2, Q region locus 7 |
| ribosomal protein S6 kinase, polypeptide 1                                                                                                                                                                                                                                            |
| leukotriene B4 12-hydroxydehydrogenase                                                                                                                                                                                                                                                |
| fragile X mental retardation syndrome 1 homolog                                                                                                                                                                                                                                       |
| leptin                                                                                                                                                                                                                                                                                |
| leptin                                                                                                                                                                                                                                                                                |
| golgi associated, gamma adaptin ear containing, ARF binding protein 1                                                                                                                                                                                                                 |
| chaperonin subunit 3 (gamma)                                                                                                                                                                                                                                                          |
| CCAAT/enhancer binding protein (C/EBP), alpha                                                                                                                                                                                                                                         |
| cancer susceptibility candidate 3                                                                                                                                                                                                                                                     |
| squamous cell carcinoma antigen recognized by T-cells 1                                                                                                                                                                                                                               |
| DnaJ (Hsp40) homolog, subfamily B, member 10                                                                                                                                                                                                                                          |
| FMS-like tyrosine kinase 1                                                                                                                                                                                                                                                            |
| FMS-like tyrosine kinase 1                                                                                                                                                                                                                                                            |
| paralemmin                                                                                                                                                                                                                                                                            |
| activating transcription factor 2                                                                                                                                                                                                                                                     |
| serine/threonine kinase 19                                                                                                                                                                                                                                                            |
| solute carrier family 4 (anion exchanger), member 4                                                                                                                                                                                                                                   |
| RIKEN cDNA 1190007F08 gene                                                                                                                                                                                                                                                            |
| serine hydroxymethyl transferase 1 (soluble)                                                                                                                                                                                                                                          |
| fatso                                                                                                                                                                                                                                                                                 |
| kinesin light chain 4                                                                                                                                                                                                                                                                 |
| kinesin light chain 4                                                                                                                                                                                                                                                                 |
| SWI/SNF related, matrix associated, actin dependent regulator of chromatin, subfamily a, member 4                                                                                                                                                                                     |
| RIKEN cDNA 1110011C06 gene                                                                                                                                                                                                                                                            |
| interferon activated gene 204 /// similar to Interferon-activatable protein 204 (Ifi-204) (Interferon-inducible protein p204)                                                                                                                                                         |
| similar to Interferon-activatable protein 204 (Ifi-204) (Interferon-inducible protein p204)                                                                                                                                                                                           |
| inter alpha-trypsin inhibitor, heavy chain 4                                                                                                                                                                                                                                          |
| bromodomain containing 1                                                                                                                                                                                                                                                              |
| aurora kinase B                                                                                                                                                                                                                                                                       |

|                                                                              |
|------------------------------------------------------------------------------|
| solute carrier family 25 (mitochondrial carrier, brain), member 14           |
| kinesin family member C1                                                     |
| histocompatibility 2, T region locus 23 /// RIKEN cDNA C920025E04 gene       |
| arginase type II                                                             |
| tumor necrosis factor alpha induced protein 6                                |
| matrilin 2                                                                   |
| RIKEN cDNA 2900054D09 gene                                                   |
| ankyrin 3, epithelial                                                        |
| cyclin G2                                                                    |
| nuclear receptor subfamily 2, group C, member 2                              |
| renin 1 structural /// renin 2 tandem duplication of Ren1                    |
| mannan-binding lectin serine peptidase 2                                     |
| parathyroid hormone receptor 1                                               |
| calcium channel, voltage-dependent, beta 3 subunit                           |
| islet cell autoantigen 1                                                     |
| rhophilin, Rho GTPase binding protein 2                                      |
| stathmin-like 4                                                              |
| myosin, heavy polypeptide 4, skeletal muscle                                 |
| discs, large homolog 7 (Drosophila)                                          |
| ADP-ribosylation factor-like 8B                                              |
| ADP-ribosylation factor-like 8B                                              |
| CKLF-like MARVEL transmembrane domain containing 7                           |
| RIKEN cDNA 3200002M19 gene                                                   |
| RIKEN cDNA 5033414D02 gene                                                   |
| glycogen synthase 1, muscle                                                  |
| epidermal growth factor receptor pathway substrate 15-like 1                 |
| caspase 7                                                                    |
| caspase 7                                                                    |
| interleukin 1 receptor-like 1                                                |
| interleukin 1 receptor-like 1                                                |
| dual specificity phosphatase 19                                              |
| ecotropic viral integration site 5                                           |
| Rho-associated coiled-coil forming kinase 2                                  |
| coproporphyrinogen oxidase                                                   |
| coproporphyrinogen oxidase                                                   |
| nuclear receptor subfamily 1, group D, member 1                              |
| phosphatidic acid phosphatase 2a                                             |
| cDNA sequence BC002199                                                       |
| hnRNP-associated with lethal yellow                                          |
| Btg3 associated nuclear protein                                              |
| G protein beta subunit-like                                                  |
| tissue factor pathway inhibitor                                              |
| general transcription factor II E, polypeptide 2 (beta subunit)              |
| cDNA sequence BC056474                                                       |
| RIKEN cDNA 2300002G24 gene                                                   |
| RIKEN cDNA 2300002G24 gene                                                   |
| vesicle-associated membrane protein 3                                        |
| proteasome (prosome, macropain) 26S subunit, non-ATPase, 8                   |
| ribosomal protein S29                                                        |
| X-linked myotubular myopathy gene 1                                          |
| erythroid differentiation regulator 1                                        |
| Erythroid differentiation regulator 1                                        |
| dodecenoyl-Coenzyme A delta isomerase (3,2 trans-enoyl-Coenzyme A isomerase) |

|                                                                                                                                                                                                                                                                                                                                                          |
|----------------------------------------------------------------------------------------------------------------------------------------------------------------------------------------------------------------------------------------------------------------------------------------------------------------------------------------------------------|
| ---                                                                                                                                                                                                                                                                                                                                                      |
| decidual/trophoblast prolactin-related protein                                                                                                                                                                                                                                                                                                           |
| growth arrest specific 5                                                                                                                                                                                                                                                                                                                                 |
| growth arrest specific 5                                                                                                                                                                                                                                                                                                                                 |
| CDK2 (cyclin-dependent kinase 2)-associated protein 1                                                                                                                                                                                                                                                                                                    |
| cytochrome b-5                                                                                                                                                                                                                                                                                                                                           |
| Sin3-associated polypeptide 18                                                                                                                                                                                                                                                                                                                           |
| catechol-O-methyltransferase                                                                                                                                                                                                                                                                                                                             |
| RIKEN cDNA 2610507B11 gene                                                                                                                                                                                                                                                                                                                               |
| COP9 (constitutive photomorphogenic) homolog, subunit 2 (Arabidopsis thaliana)                                                                                                                                                                                                                                                                           |
| COP9 (constitutive photomorphogenic) homolog, subunit 2 (Arabidopsis thaliana)                                                                                                                                                                                                                                                                           |
| cathepsin S                                                                                                                                                                                                                                                                                                                                              |
| guanylate kinase 1                                                                                                                                                                                                                                                                                                                                       |
| prohibitin 2                                                                                                                                                                                                                                                                                                                                             |
| mitochondrial ribosomal protein S12                                                                                                                                                                                                                                                                                                                      |
| vitronectin                                                                                                                                                                                                                                                                                                                                              |
| SET translocation                                                                                                                                                                                                                                                                                                                                        |
| polyamine-modulated factor 1                                                                                                                                                                                                                                                                                                                             |
| sarcolemma associated protein                                                                                                                                                                                                                                                                                                                            |
| N-myc downstream regulated gene 3                                                                                                                                                                                                                                                                                                                        |
| tetratricopeptide repeat domain 3                                                                                                                                                                                                                                                                                                                        |
| proteasome (prosome, macropain) subunit, beta type 4                                                                                                                                                                                                                                                                                                     |
| proteasome (prosome, macropain) subunit, beta type 4                                                                                                                                                                                                                                                                                                     |
| proteasome (prosome, macropain) subunit, beta type 4                                                                                                                                                                                                                                                                                                     |
| smoothelin                                                                                                                                                                                                                                                                                                                                               |
| clathrin, light polypeptide (Lcb)                                                                                                                                                                                                                                                                                                                        |
| troponin I, skeletal, slow 1                                                                                                                                                                                                                                                                                                                             |
| complement component 1, q subcomponent, alpha polypeptide                                                                                                                                                                                                                                                                                                |
| microspherule protein 1 /// similar to Microspherule protein 1 (58 kDa microspherule protein) /// similar to Microspherule protein 1 (58 kDa microspherule protein)                                                                                                                                                                                      |
| ribosomal protein S26                                                                                                                                                                                                                                                                                                                                    |
| ribosomal protein S26 /// similar to 40S ribosomal protein S26 /// similar to 40S ribosomal protein S26 /// similar to 40S ribosomal protein S26                                                                                                                                                                                                         |
| chorionic somatomammotropin hormone 2                                                                                                                                                                                                                                                                                                                    |
| solute carrier family 25 (mitochondrial carrier, phosphate carrier), member 25                                                                                                                                                                                                                                                                           |
| nascent polypeptide-associated complex alpha polypeptide                                                                                                                                                                                                                                                                                                 |
| nascent polypeptide-associated complex alpha polypeptide /// similar to nascent polypeptide-associated complex alpha polypeptide |
| DnaJ (Hsp40) homolog, subfamily B, member 11                                                                                                                                                                                                                                                                                                             |
| RAN binding protein 1                                                                                                                                                                                                                                                                                                                                    |
| pre-mRNA processing factor 8                                                                                                                                                                                                                                                                                                                             |
| fatty acid synthase                                                                                                                                                                                                                                                                                                                                      |
| ---                                                                                                                                                                                                                                                                                                                                                      |
| oocyte maturation, beta                                                                                                                                                                                                                                                                                                                                  |
| early growth response 1                                                                                                                                                                                                                                                                                                                                  |
| protein phosphatase 1A, magnesium dependent, alpha isoform                                                                                                                                                                                                                                                                                               |
| homogentisate 1, 2-dioxygenase                                                                                                                                                                                                                                                                                                                           |
| B-cell translocation gene 4                                                                                                                                                                                                                                                                                                                              |
| nucleosome assembly protein 1-like 1                                                                                                                                                                                                                                                                                                                     |
| nucleosome assembly protein 1-like 1                                                                                                                                                                                                                                                                                                                     |
| fumarylacetoacetate hydrolase                                                                                                                                                                                                                                                                                                                            |
| adipose differentiation related protein                                                                                                                                                                                                                                                                                                                  |
| syndecan 4                                                                                                                                                                                                                                                                                                                                               |
| cytidine monophospho-N-acetylneuraminic acid synthetase                                                                                                                                                                                                                                                                                                  |
| RIKEN cDNA 1190002N15 gene                                                                                                                                                                                                                                                                                                                               |
| interleukin-1 receptor-associated kinase 1                                                                                                                                                                                                                                                                                                               |

|                                                                                                                          |
|--------------------------------------------------------------------------------------------------------------------------|
| ST3 beta-galactoside alpha-2,3-sialyltransferase 5                                                                       |
| ubiquitin-conjugating enzyme E2L 6                                                                                       |
| expressed sequence C78891                                                                                                |
| hepatoma-derived growth factor, related protein 2                                                                        |
| S100 calcium binding protein A11 (calizzarin)                                                                            |
| RAN GTPase activating protein 1                                                                                          |
| RAN GTPase activating protein 1                                                                                          |
| novel nuclear protein 1                                                                                                  |
| tryptophanyl-tRNA synthetase                                                                                             |
| tryptophanyl-tRNA synthetase                                                                                             |
| eukaryotic translation termination factor 1                                                                              |
| septin 9                                                                                                                 |
| mitochondrial ribosomal protein S28                                                                                      |
| cytochrome P450, family 2, subfamily d, polypeptide 10                                                                   |
| RIKEN cDNA 2700085E05 gene                                                                                               |
| nephronophthisis 1 (juvenile) homolog (human)                                                                            |
| RIKEN cDNA 0610041E09 gene                                                                                               |
| similar to myosin, heavy polypeptide 4, skeletal muscle                                                                  |
| WW domain binding protein 11                                                                                             |
| deoxythymidylate kinase                                                                                                  |
| deoxythymidylate kinase                                                                                                  |
| N-acetylglucosamine-1-phosphotransferase, gamma subunit                                                                  |
| insulin-like growth factor 2                                                                                             |
| insulin-like growth factor 2                                                                                             |
| RNA-binding region (RNP1, RRM) containing 1                                                                              |
| alcohol dehydrogenase 5 (class III), chi polypeptide /// similar to alcohol dehydrogenase 5 (class III), chi polypeptide |
| RIKEN cDNA 1810017G16 gene                                                                                               |
| insulin-like growth factor binding protein 2                                                                             |
| hypoxia inducible factor 1, alpha subunit                                                                                |
| hypoxia inducible factor 1, alpha subunit                                                                                |
| NAD(P) dependent steroid dehydrogenase-like                                                                              |
| NAD(P) dependent steroid dehydrogenase-like                                                                              |
| adenosine deaminase                                                                                                      |
| transmembrane protein 43                                                                                                 |
| ubiquitin-conjugating enzyme E2Z (putative)                                                                              |
| progesterone receptor                                                                                                    |
| guanylate cyclase 2e                                                                                                     |
| tumor necrosis factor receptor superfamily, member 8                                                                     |
| formin binding protein 1                                                                                                 |
| fibroblast growth factor 17                                                                                              |
| RAB5B, member RAS oncogene family                                                                                        |
| ELK4, member of ETS oncogene family                                                                                      |
| RIKEN cDNA 2810043O03 gene                                                                                               |
| arachidonate 15-lipoxygenase                                                                                             |
| tubulin, alpha 1 /// tubulin, alpha 2 /// tubulin, alpha 6                                                               |
| zinc finger homeodomain 4                                                                                                |
| zinc finger protein 97 /// cDNA sequence BC018101                                                                        |
| zinc finger protein 97                                                                                                   |
| DNA segment, KIST 4                                                                                                      |
| DNA segment, KIST 2                                                                                                      |
| immunoglobulin heavy chain variable region /// similar to immunoglobulin mu-chain                                        |
| SH3-domain binding protein 5 (BTK-associated)                                                                            |
| YY1 transcription factor                                                                                                 |

|                                                                                              |
|----------------------------------------------------------------------------------------------|
| prostaglandin E receptor 2 (subtype EP2)                                                     |
| centromere autoantigen C1                                                                    |
| Eph receptor B2                                                                              |
| chemokine (C-X-C motif) ligand 5                                                             |
| immunoresponsive gene 1                                                                      |
| immunoresponsive gene 1                                                                      |
| serine/threonine kinase 3 (Ste20, yeast homolog)                                             |
| immunoglobulin heavy chain 6 (heavy chain of IgM)                                            |
| vasoactive intestinal peptide receptor 1                                                     |
| septin 11                                                                                    |
| olfactory receptor 91                                                                        |
| homeo box B3                                                                                 |
| gastrin releasing peptide receptor                                                           |
| complexin 2                                                                                  |
| RNA binding motif protein, Y chromosome, family 1, member A1                                 |
| G-protein coupled receptor 12                                                                |
| Transcribed locus                                                                            |
| G-protein coupled receptor 3                                                                 |
| potassium inwardly rectifying channel, subfamily J, member 11                                |
| pituitary specific transcription factor 1                                                    |
| cyclin-dependent kinase inhibitor 2A                                                         |
| myeloid ecotropic viral integration site 1                                                   |
| retinoic acid induced 1                                                                      |
| expressed sequence AW011956                                                                  |
| growth differentiation factor 5                                                              |
| src-related kinase lacking C-terminal regulatory tyrosine and N-terminal myristylation sites |
| thyroid hormone receptor beta                                                                |
| major intrinsic protein of eye lens fiber                                                    |
| gastrin                                                                                      |
| chondroitin sulfate proteoglycan 3                                                           |
| chondroitin sulfate proteoglycan 3                                                           |
| solute carrier family 23 (nucleobase transporters), member 3                                 |
| killer cell lectin-like receptor, subfamily A, member 2                                      |
| epiregulin                                                                                   |
| zinc finger protein 354A                                                                     |
| homeo box gene expressed in ES cells                                                         |
| tubby candidate gene                                                                         |
| tubby candidate gene                                                                         |
| guanine nucleotide binding protein, alpha transducing 2                                      |
| neurogenic differentiation 2                                                                 |
| neurofibromatosis 1                                                                          |
| 5-hydroxytryptamine (serotonin) receptor 5B                                                  |
| prostaglandin I receptor (IP)                                                                |
| CD40 ligand                                                                                  |
| reticuloendotheliosis oncogene                                                               |
| casein delta                                                                                 |
| even skipped homeotic gene 1 homolog                                                         |
| even skipped homeotic gene 1 homolog                                                         |
| follistatin                                                                                  |
| nuclear receptor subfamily 3, group C, member 1                                              |
| homeo box D1                                                                                 |
| homeo box D1                                                                                 |
| insulin promoter factor 1, homeodomain transcription factor                                  |

|                                                                                        |
|----------------------------------------------------------------------------------------|
| ISG15 ubiquitin-like modifier                                                          |
| potassium inwardly-rectifying channel, subfamily J, member 2                           |
| insulin receptor substrate 1                                                           |
| potassium voltage-gated channel, Isk-related subfamily, member 1                       |
| fibroblast growth factor 4                                                             |
| kinesin family member 5C                                                               |
| integrin alpha M                                                                       |
| potassium inwardly-rectifying channel, subfamily J, member 12                          |
| spermine binding protein                                                               |
| forkhead box J1                                                                        |
| thyroid peroxidase                                                                     |
| matrix metallopeptidase 3                                                              |
| integrin alpha 2                                                                       |
| sema domain, immunoglobulin domain (Ig), short basic domain, secreted, (semaphorin) 3A |
| programmed cell death 1                                                                |
| relaxin 1                                                                              |
| paired box gene 9                                                                      |
| sine oculis-related homeobox 2 homolog (Drosophila)                                    |
| BMX non-receptor tyrosine kinase                                                       |
| activin receptor IIA                                                                   |
| seminal vesicle secretion 5                                                            |
| Zic finger protein of the cerebellum 2                                                 |
| Zic finger protein of the cerebellum 2                                                 |
| fibroblast growth factor 5                                                             |
| pregnancy specific glycoprotein 17                                                     |
| syndecan 3                                                                             |
| sorbin and SH3 domain containing 3                                                     |
| DNA segment, Chr 8, Brigham & Women's Genetics 1414 expressed                          |
| tolloid-like                                                                           |
| Musashi homolog 1(Drosophila)                                                          |
| sal-like 3 (Drosophila)                                                                |
| phospholipase A2 receptor 1                                                            |
| ataxin 1                                                                               |
| RIKEN cDNA A930001N09 gene                                                             |
| prostaglandin D receptor                                                               |
| neurogenic differentiation 6                                                           |
| gastric inhibitory polypeptide                                                         |
| acid phosphatase 5, tartrate resistant                                                 |
| steroid sulfatase                                                                      |
| ---                                                                                    |
| wingless related MMTV integration site 10a                                             |
| glutamate receptor, ionotropic, kainate 2 (beta 2)                                     |
| glutamate receptor, ionotropic, kainate 2 (beta 2)                                     |
| hyaluronan synthase 2                                                                  |
| distal-less homeobox 6                                                                 |
| distal-less homeobox 6, antisense                                                      |
| B-cell leukemia/lymphoma 2                                                             |
| B-cell leukemia/lymphoma 2                                                             |
| B-cell leukemia/lymphoma 2                                                             |
| G protein-coupled receptor 143                                                         |
| UDP galactosyltransferase 8A                                                           |
| distal-less homeobox 4                                                                 |
| Tnf receptor-associated factor 6                                                       |

|                                                                                                                                                                        |
|------------------------------------------------------------------------------------------------------------------------------------------------------------------------|
| DNA segment, Chr 2, ERATO Doi 391, expressed                                                                                                                           |
| mitochondrial ribosomal protein L11                                                                                                                                    |
| achalasia, adrenocortical insufficiency, alacrimia                                                                                                                     |
| DNA segment, Chr 6, Wayne State University 116, expressed                                                                                                              |
| haloacid dehalogenase-like hydrolase domain containing 2                                                                                                               |
| nuclear distribution gene E-like homolog 1 (A. nidulans)                                                                                                               |
| nuclear distribution gene E-like homolog 1 (A. nidulans)                                                                                                               |
| nuclear distribution gene E-like homolog 1 (A. nidulans)                                                                                                               |
| RIKEN cDNA 2810410M20 gene /// similar to AIP1                                                                                                                         |
| N-ethylmaleimide sensitive fusion protein attachment protein alpha                                                                                                     |
| amine oxidase (flavin containing) domain 2                                                                                                                             |
| RIKEN cDNA 1700012G19 gene                                                                                                                                             |
| RIKEN cDNA 1600012H06 gene                                                                                                                                             |
| lipin 1                                                                                                                                                                |
| polybromo 1                                                                                                                                                            |
| polybromo 1                                                                                                                                                            |
| RIKEN cDNA 5830457O10 gene                                                                                                                                             |
| RIKEN cDNA 1110008B24 gene /// similar to Protein C14orf111 homolog                                                                                                    |
| Mitochondrial ribosomal protein L14                                                                                                                                    |
| Mitochondrial ribosomal protein L14                                                                                                                                    |
| mitochondrial ribosomal protein L35                                                                                                                                    |
| septin 7                                                                                                                                                               |
| f-box only protein 9                                                                                                                                                   |
| signal peptide peptidase 3                                                                                                                                             |
| lipoic acid synthetase                                                                                                                                                 |
| RIKEN cDNA 1110014K08 gene /// hypothetical protein LOC664786 /// hypothetical protein LOC664849 /// hypothetical protein LOC669054 /// hypothetical protein LOC672175 |
| Janus kinase 1                                                                                                                                                         |
| La ribonucleoprotein domain family, member 5                                                                                                                           |
| ASF1 anti-silencing function 1 homolog A (S. cerevisiae)                                                                                                               |
| ring finger protein 149                                                                                                                                                |
| protein phosphatase 2 (formerly 2A), regulatory subunit B (PR 52), alpha isoform                                                                                       |
| hippocampus abundant transcript-like 1                                                                                                                                 |
| thioredoxin domain containing 5                                                                                                                                        |
| TM2 domain containing 2                                                                                                                                                |
| TM2 domain containing 2                                                                                                                                                |
| TM2 domain containing 2                                                                                                                                                |
| STT3, subunit of the oligosaccharyltransferase complex, homolog A (S. cerevisiae)                                                                                      |
| RNA terminal phosphate cyclase-like 1                                                                                                                                  |
| ADP-ribosyltransferase 3                                                                                                                                               |
| vesicle-associated membrane protein 2                                                                                                                                  |
| vesicle-associated membrane protein 2                                                                                                                                  |
| RAB6, member RAS oncogene family                                                                                                                                       |
| coronin, actin binding protein 1B                                                                                                                                      |
| mitochondrial ribosomal protein S36                                                                                                                                    |
| coatamer protein complex, subunit epsilon                                                                                                                              |
| glucosamine (N-acetyl)-6-sulfatase                                                                                                                                     |
| RIKEN cDNA 4833427B12 gene                                                                                                                                             |
| MAP/microtubule affinity-regulating kinase 3                                                                                                                           |
| RIKEN cDNA 0610007P06 gene                                                                                                                                             |
| seryl-aminoacyl-tRNA synthetase                                                                                                                                        |
| transforming growth factor beta regulated gene 1                                                                                                                       |
| RIKEN cDNA 1500026D16 gene                                                                                                                                             |
| aspartyl-tRNA synthetase                                                                                                                                               |

|                                                                                                                  |
|------------------------------------------------------------------------------------------------------------------|
| preimplantation protein 4                                                                                        |
| preimplantation protein 4                                                                                        |
| replication protein A2                                                                                           |
| SEC23B (S. cerevisiae)                                                                                           |
| SH3-domain GRB2-like B1 (endophilin)                                                                             |
| WD repeat and SOCS box-containing 1                                                                              |
| bromodomain containing 3                                                                                         |
| guanine nucleotide binding protein-like 3 (nucleolar)                                                            |
| Ras-related GTP binding C                                                                                        |
| transcription factor 25 (basic helix-loop-helix)                                                                 |
| transcription factor 25 (basic helix-loop-helix)                                                                 |
| eukaryotic translation initiation factor 1B                                                                      |
| oogenesin 1                                                                                                      |
| serine/threonine kinase 25 (yeast)                                                                               |
| translocating chain-associating membrane protein 1                                                               |
| junction adhesion molecule 3                                                                                     |
| enhancer of yellow 2 homolog (Drosophila)                                                                        |
| RIKEN cDNA 0610016J10 gene /// hypothetical LOC619602                                                            |
| UDP-GalNAc:betaGlcNAc beta 1,3-galactosaminyltransferase, polypeptide 1                                          |
| UDP-GalNAc:betaGlcNAc beta 1,3-galactosaminyltransferase, polypeptide 1                                          |
| lipase, hepatic                                                                                                  |
| transient receptor potential cation channel, subfamily V, member 2                                               |
| O-acyltransferase (membrane bound) domain containing 5                                                           |
| dihydrolipoamide branched chain transacylase E2                                                                  |
| fatty acid binding protein 7, brain                                                                              |
| myosin Va                                                                                                        |
| ATP-binding cassette, sub-family D (ALD), member 1                                                               |
| geranylgeranyl diphosphate synthase 1                                                                            |
| RAD54 like (S. cerevisiae)                                                                                       |
| ubiquitin specific peptidase 8                                                                                   |
| WD repeat domain 43                                                                                              |
| Immunoglobulin heavy chain 1a (serum IgG2a)                                                                      |
| nucleoporin 93                                                                                                   |
| ADAM-like, decysin 1                                                                                             |
| Terf1 (TRF1)-interacting nuclear factor 2                                                                        |
| menage a trois 1                                                                                                 |
| CD37 antigen                                                                                                     |
| transcription factor 12                                                                                          |
| thymopoietin                                                                                                     |
| procollagen-proline, 2-oxoglutarate 4-dioxygenase (proline 4-hydroxylase), alpha II polypeptide                  |
| glycerol phosphate dehydrogenase 2, mitochondrial                                                                |
| Fas-associated factor 1                                                                                          |
| nuclear factor of kappa light polypeptide gene enhancer in B-cells inhibitor, zeta                               |
| 7-dehydrocholesterol reductase                                                                                   |
| breast cancer anti-estrogen resistance 1                                                                         |
| SWI/SNF-related, matrix-associated actin-dependent regulator of chromatin, subfamily a, containing DEAD/H box 1` |
| endothelial precursor protein B9                                                                                 |
| protein phosphatase 2, regulatory subunit B (B56), gamma isoform                                                 |
| solute carrier family 34 (sodium phosphate), member 2                                                            |
| E2F transcription factor 5                                                                                       |
| polo-like kinase 4 (Drosophila)                                                                                  |
| keratin complex 1, acidic, gene 24                                                                               |
| keratin complex 1, acidic, gene 24                                                                               |



|                                                                                                                  |
|------------------------------------------------------------------------------------------------------------------|
| adenylosuccinate lyase                                                                                           |
| mitogen activated protein kinase 7                                                                               |
| zinc finger protein 292                                                                                          |
| similar to bloodthirsty /// similar to tripartite motif-containing 43 /// similar to tripartite motif protein 17 |
| RAD1 homolog (S. pombe)                                                                                          |
| RIKEN cDNA 2810040C05 gene                                                                                       |
| flotillin 2                                                                                                      |
| nicotinamide nucleotide transhydrogenase                                                                         |
| immunoglobulin superfamily containing leucine-rich repeat                                                        |
| UDP-N-acetyl-alpha-D-galactosamine:polypeptide N-acetylgalactosaminyltransferase 3                               |
| sperm flagellar 1                                                                                                |
| tropomodulin 3                                                                                                   |
| amyloid beta (A4) precursor protein-binding, family B, member 1                                                  |
| promyelocytic leukemia                                                                                           |
| ---                                                                                                              |
| BCL2-associated transcription factor 1                                                                           |
| P450 (cytochrome) oxidoreductase                                                                                 |
| YY1 transcription factor /// hypothetical LOC629517 /// hypothetical protein LOC675872                           |
| paired related homeobox 1                                                                                        |
| platelet-activating factor acetylhydrolase, isoform 1b, alpha2 subunit                                           |
| Max dimerization protein 4                                                                                       |
| DEAD (Asp-Glu-Ala-Asp) box polypeptide 19a                                                                       |
| Bcl2-like 1                                                                                                      |
| Bcl2-like 1                                                                                                      |
| ring finger protein 8                                                                                            |
| protein inhibitor of activated STAT 1                                                                            |
| interleukin 7 receptor                                                                                           |
| ankyrin repeat domain 17                                                                                         |
| RAS, dexamethasone-induced 1                                                                                     |
| inositol 1,3,4-triphosphate 5/6 kinase                                                                           |
| Iroquois related homeobox 3 (Drosophila)                                                                         |
| phosphate cytidyltransferase 1, choline, alpha isoform                                                           |
| mitogen activated protein kinase kinase 7                                                                        |
| mitogen activated protein kinase kinase 7                                                                        |
| adenylosuccinate synthetase, non muscle                                                                          |
| adenylosuccinate synthetase, non muscle                                                                          |
| solute carrier family 6 (neurotransmitter transporter, serotonin), member 4                                      |
| TATA box binding protein (Tbp)-associated factor, RNA polymerase I, B                                            |
| short stature homeobox 2                                                                                         |
| short stature homeobox 2                                                                                         |
| zinc finger protein 358                                                                                          |
| enolase 2, gamma neuronal                                                                                        |
| myelin-associated oligodendrocytic basic protein                                                                 |
| myelin-associated oligodendrocytic basic protein                                                                 |
| myelin-associated oligodendrocytic basic protein                                                                 |
| caspase 2                                                                                                        |
| caveolin 3                                                                                                       |
| S100 calcium binding protein A4                                                                                  |
| zinc finger homeobox 1a                                                                                          |
| intercellular adhesion molecule 2                                                                                |
| lethal giant larvae homolog 1 (Drosophila)                                                                       |
| ST6 (alpha-N-acetyl-neuraminy1-2,3-beta-galactosyl-1,3)-N-acetylgalactosaminide alpha-2,6-sialyltransferase 2    |
| pterin 4 alpha carbinolamine dehydratase/dimerization cofactor of hepatocyte nuclear factor 1 alpha (TCF1) 1     |

|                                                                                                                                                                           |
|---------------------------------------------------------------------------------------------------------------------------------------------------------------------------|
| thymus cell antigen 1, theta                                                                                                                                              |
| high mobility group AT-hook 2                                                                                                                                             |
| E74-like factor 3                                                                                                                                                         |
| poliovirus receptor-related 3                                                                                                                                             |
| syntaxin 8                                                                                                                                                                |
| ubiquitin specific peptidase 4 (proto-oncogene)                                                                                                                           |
| casein kappa                                                                                                                                                              |
| growth arrest specific 6                                                                                                                                                  |
| anaphase promoting complex subunit 1                                                                                                                                      |
| neurotrophic tyrosine kinase, receptor, type 2                                                                                                                            |
| conserved helix-loop-helix ubiquitous kinase                                                                                                                              |
| macrophage expressed gene 1 /// similar to macrophage expressed gene 1                                                                                                    |
| cyclin F                                                                                                                                                                  |
| villin 1                                                                                                                                                                  |
| nuclear receptor subfamily 1, group D, member 2                                                                                                                           |
| thyroid hormone receptor alpha                                                                                                                                            |
| deoxyhypusine hydroxylase/monooxygenase                                                                                                                                   |
| coiled-coil domain containing 6                                                                                                                                           |
| serine (or cysteine) peptidase inhibitor, clade G, member 1                                                                                                               |
| FK506 binding protein 10                                                                                                                                                  |
| cytochrome P450, family 2. subfamily c, polypeptide 37                                                                                                                    |
| ubiquitin specific peptidase 3                                                                                                                                            |
| ubiquitin specific peptidase 3                                                                                                                                            |
| ubiquitin specific peptidase 3                                                                                                                                            |
| ZW10 interactor                                                                                                                                                           |
| myelin and lymphocyte protein, T-cell differentiation protein                                                                                                             |
| ribosomal protein S10 /// similar to ribosomal protein S10 |
| solute carrier family 12, member 1                                                                                                                                        |
| Max protein                                                                                                                                                               |
| DEAD (Asp-Glu-Ala-Asp) box polypeptide 24                                                                                                                                 |
| eukaryotic translation initiation factor 4E                                                                                                                               |
| farnesyl diphosphate synthetase                                                                                                                                           |
| signal transducer and activator of transcription 3                                                                                                                        |
| signal transducer and activator of transcription 3                                                                                                                        |
| eukaryotic translation initiation factor 3, subunit 7 (zeta)                                                                                                              |
| ubiquitin specific peptidase 9, X chromosome                                                                                                                              |
| interferon regulatory factor 3                                                                                                                                            |
| adiponectin, C1Q and collagen domain containing                                                                                                                           |
| COP9 (constitutive photomorphogenic) homolog, subunit 6 (Arabidopsis thaliana)                                                                                            |
| growth hormone receptor                                                                                                                                                   |
| growth hormone receptor                                                                                                                                                   |
| immediate early response 2                                                                                                                                                |
| ClpB caseinolytic peptidase B homolog (E. coli)                                                                                                                           |
| solute carrier family 25 (mitochondrial carrier, dicarboxylate transporter), member 10                                                                                    |
| COP9 (constitutive photomorphogenic) homolog, subunit 3 (Arabidopsis thaliana)                                                                                            |
| ets variant gene 2 /// cytochrome c oxidase, subunit VIb polypeptide 1                                                                                                    |
| ubiquinol-cytochrome c reductase hinge protein                                                                                                                            |
| proline-rich acidic protein 1                                                                                                                                             |
| cofilin 1, non-muscle                                                                                                                                                     |
| chromodomain helicase DNA binding protein 4                                                                                                                               |
| fragile X mental retardation gene 1, autosomal homolog                                                                                                                    |
| fractured callus expressed transcript 1                                                                                                                                   |
| fractured callus expressed transcript 1                                                                                                                                   |

|                                                                                               |
|-----------------------------------------------------------------------------------------------|
| inactive X specific transcripts                                                               |
| ataxin 10                                                                                     |
| ATP synthase, H+ transporting, mitochondrial F1 complex, O subunit                            |
| tumor necrosis factor superfamily, member 5-induced protein 1                                 |
| casein beta                                                                                   |
| solute carrier family 3 (activators of dibasic and neutral amino acid transport), member 2    |
| t-complex-associated testis expressed 3                                                       |
| cell division cycle 37 homolog (S. cerevisiae)                                                |
| AXL receptor tyrosine kinase                                                                  |
| regulator of chromosome condensation 1                                                        |
| vacuolar protein sorting 26 homolog B (yeast)                                                 |
| mitochondrial ribosomal protein L16                                                           |
| GM2 ganglioside activator protein                                                             |
| progesterone and adiponectin receptor family member VII                                       |
| trans-golgi network protein                                                                   |
| trans-golgi network protein                                                                   |
| syntrophin 6                                                                                  |
| zinc finger, HIT domain containing 1                                                          |
| fumarate hydratase 1                                                                          |
| similar to mouse RING finger 1                                                                |
| immature colon carcinoma transcript 1                                                         |
| exosome component 7                                                                           |
| fibromodulin                                                                                  |
| mitochondrial ribosomal protein L53                                                           |
| RIKEN cDNA 1810020D17 gene                                                                    |
| PDZ domain containing 11                                                                      |
| RIKEN cDNA 2310004N24 gene                                                                    |
| osteoclast stimulating factor 1                                                               |
| peptidylprolyl isomerase F (cyclophilin F)                                                    |
| glutamate receptor, ionotropic, N-methyl D-aspartate-associated protein 1 (glutamate binding) |
| glutamate receptor, ionotropic, N-methyl D-aspartate-associated protein 1 (glutamate binding) |
| survival motor neuron domain containing 1                                                     |
| RIKEN cDNA 4921506J03 gene                                                                    |
| mitogen activated protein binding protein interacting protein                                 |
| RIKEN cDNA 0610012G03 gene                                                                    |
| COMM domain containing 4                                                                      |
| phosphatidylinositol glycan, class S                                                          |
| protein arginine N-methyltransferase 4                                                        |
| integrator complex subunit 6                                                                  |
| transcription factor A, mitochondrial                                                         |
| guanine nucleotide binding protein (G protein), gamma 10                                      |
| fibroblast growth factor (acidic) intracellular binding protein                               |
| glycoprotein m6b                                                                              |
| CUE domain containing 2                                                                       |
| GTP binding protein 4                                                                         |
| ribonuclease P 14 subunit (human)                                                             |
| protein phosphatase 3, regulatory subunit B, alpha isoform (calcineurin B, type I)            |
| cysteine sulfinic acid decarboxylase                                                          |
| mitochondrial ribosomal protein L41                                                           |
| cyclin A2                                                                                     |
| RIKEN cDNA 2010315L10 gene                                                                    |
| RIKEN cDNA 2010315L10 gene                                                                    |
| phosphoserine-tRNA kinase                                                                     |

|                                                                                                                                                                                                                      |
|----------------------------------------------------------------------------------------------------------------------------------------------------------------------------------------------------------------------|
| CREBBP/EP300 inhibitory protein 1                                                                                                                                                                                    |
| polyribonucleotide nucleotidyltransferase 1 /// similar to polyribonucleotide nucleotidyltransferase 1                                                                                                               |
| PEST proteolytic signal containing nuclear protein /// similar to PEST-containing nuclear protein (PCNP) /// similar to PEST-containing nuclear protein (PCNP) /// similar to PEST-containing nuclear protein (PCNP) |
| PEST proteolytic signal containing nuclear protein                                                                                                                                                                   |
| group specific component                                                                                                                                                                                             |
| similar to 60S ribosomal protein L32                                                                                                                                                                                 |
| lipocalin 5                                                                                                                                                                                                          |
| ---                                                                                                                                                                                                                  |
| guanine nucleotide binding protein, beta 3                                                                                                                                                                           |
| axin2                                                                                                                                                                                                                |
| tryptophan 2,3-dioxygenase                                                                                                                                                                                           |
| ST8 alpha-N-acetyl-neuraminide alpha-2,8-sialyltransferase 5                                                                                                                                                         |
| fer (fms/fps related) protein kinase, testis specific 2                                                                                                                                                              |
| potassium voltage-gated channel, subfamily Q, member 1                                                                                                                                                               |
| interleukin 12 receptor, beta 2                                                                                                                                                                                      |
| protease, serine, 7 (enterokinase)                                                                                                                                                                                   |
| wingless-related MMTV integration site 3                                                                                                                                                                             |
| phospholipase A2, group IIC                                                                                                                                                                                          |
| kallikrein 8                                                                                                                                                                                                         |
| distal-less homeobox 3                                                                                                                                                                                               |
| ATP-binding cassette, sub-family C (CFTR/MRP), member 1                                                                                                                                                              |
| colony stimulating factor 2 receptor, alpha, low-affinity (granulocyte-macrophage)                                                                                                                                   |
| SPEG complex locus                                                                                                                                                                                                   |
| opioid receptor, delta 1                                                                                                                                                                                             |
| selectin, endothelial cell                                                                                                                                                                                           |
| interferon gamma                                                                                                                                                                                                     |
| hexokinase 1                                                                                                                                                                                                         |
| ribosomal protein S5                                                                                                                                                                                                 |
| brain-specific angiogenesis inhibitor 1-associated protein 2                                                                                                                                                         |
| cullin associated and neddylation disassociated 1                                                                                                                                                                    |
| potassium voltage-gated channel, Shal-related family, member 2                                                                                                                                                       |
| guanine nucleotide binding protein (G protein), beta polypeptide 2 like 1                                                                                                                                            |
| RIKEN cDNA 9130016M20 gene                                                                                                                                                                                           |
| gamma-aminobutyric acid (GABA-A) receptor, subunit delta                                                                                                                                                             |
| RIKEN cDNA 4932441K18 gene                                                                                                                                                                                           |
| Adaptor-related protein complex 1, sigma 2 subunit                                                                                                                                                                   |
| M-phase phosphoprotein 9                                                                                                                                                                                             |
| UDP-Gal:betaGlcNAc beta 1,4-galactosyltransferase, polypeptide 3                                                                                                                                                     |
| echinoderm microtubule associated protein like 5                                                                                                                                                                     |
| 6-phosphofructo-2-kinase/fructose-2,6-biphosphatase 3                                                                                                                                                                |
| interleukin 17A                                                                                                                                                                                                      |
| SEC63-like (S. cerevisiae)                                                                                                                                                                                           |
| expressed sequence C76132                                                                                                                                                                                            |
| ---                                                                                                                                                                                                                  |
| expressed sequence C76554                                                                                                                                                                                            |
| transportin 1 /// similar to transportin 1                                                                                                                                                                           |
| expressed sequence C76614                                                                                                                                                                                            |
| DNA segment, Chr 15, ERATO Doi 30, expressed                                                                                                                                                                         |
| DNA segment, Chr 9, ERATO Doi 26, expressed                                                                                                                                                                          |
| serine active site containing 1                                                                                                                                                                                      |
| wingless-related MMTV integration site 8A                                                                                                                                                                            |
| expressed sequence C77144                                                                                                                                                                                            |
| DNA segment, Chr 6, ERATO Doi 47, expressed                                                                                                                                                                          |

|                                                                                                                                                       |
|-------------------------------------------------------------------------------------------------------------------------------------------------------|
| retinoblastoma binding protein 6                                                                                                                      |
| coenzyme Q3 homolog, methyltransferase (yeast)                                                                                                        |
| PQ loop repeat containing                                                                                                                             |
| microtubule-associated protein, RP/EB family, member 1                                                                                                |
| angiotensin receptor-like 1                                                                                                                           |
| immunoglobulin kappa chain variable 10-95                                                                                                             |
| killer cell lectin-like receptor subfamily C, member 1                                                                                                |
| potassium voltage-gated channel, Shal-related family, member 3                                                                                        |
| endothelial differentiation, sphingolipid G-protein-coupled receptor, 5                                                                               |
| gap junction membrane channel protein beta 4                                                                                                          |
| erythropoietin                                                                                                                                        |
| secretory blood group 1                                                                                                                               |
| potassium inwardly-rectifying channel, subfamily J, member 5                                                                                          |
| odorant binding protein 1a                                                                                                                            |
| histocompatibility 2, Q region locus 1                                                                                                                |
| similar to H-2 class I histocompatibility antigen, L-D alpha chain precursor                                                                          |
| potassium voltage-gated channel, shaker-related subfamily, member 2                                                                                   |
| fucosyltransferase 1                                                                                                                                  |
| glutamate receptor, ionotropic, NMDA2D (epsilon 4)                                                                                                    |
| ---                                                                                                                                                   |
| proviral integration site 1                                                                                                                           |
| POU domain, class 3, transcription factor 2                                                                                                           |
| POU domain, class 3, transcription factor 4                                                                                                           |
| formyl peptide receptor 1                                                                                                                             |
| Rous sarcoma oncogene                                                                                                                                 |
| T-cell receptor beta, variable 13 /// similar to T-cell receptor beta chain V region CTL-L17 precursor                                                |
| wingless-related MMTV integration site 5A                                                                                                             |
| ecotropic viral integration site 1                                                                                                                    |
| tumor necrosis factor, alpha-induced protein 3                                                                                                        |
| bone morphogenetic protein 5                                                                                                                          |
| hyaluronan synthase 3                                                                                                                                 |
| opsin 1 (cone pigments), short-wave-sensitive (color blindness, tritan)                                                                               |
| Immunoglobulin kappa light chain                                                                                                                      |
| excision repair cross-complementing rodent repair deficiency, complementation group 2                                                                 |
| granzyme K                                                                                                                                            |
| agouti related protein                                                                                                                                |
| cDNA sequence BC048599                                                                                                                                |
| U2AF homology motif (UHM) kinase 1 /// similar to U2AF homology motif (UHM) kinase 1                                                                  |
| ADP-ribosyltransferase 2b                                                                                                                             |
| ADP-ribosyltransferase 2a                                                                                                                             |
| cytochrome P450, family 7, subfamily a, polypeptide 1                                                                                                 |
| immunoglobulin kappa chain variable 1-135 /// immunoglobulin kappa chain variable 1-133 /// similar to Ig kappa chain V-II region RPMI 6410 precursor |
| fucosyltransferase 4                                                                                                                                  |
| olfactory marker protein                                                                                                                              |
| solute carrier family 6 (neurotransmitter transporter, noradrenalin), member 2                                                                        |
| solute carrier family 6 (neurotransmitter transporter, noradrenalin), member 2                                                                        |
| potassium channel, subfamily U, member 1                                                                                                              |
| 5-hydroxytryptamine (serotonin) receptor 1B                                                                                                           |
| chemokine (C-C motif) receptor 3                                                                                                                      |
| chemokine (C-C motif) receptor 1                                                                                                                      |
| rhophilin, Rho GTPase binding protein 1                                                                                                               |
| frizzled homolog 8 (Drosophila)                                                                                                                       |
| Oxysterol binding protein-like 9                                                                                                                      |

|                                                                                                                                                                                                                                                                                                                                                                                                                                                                                                                                                                                                                                                                                                                                                                                                                                                                                                                                                        |
|--------------------------------------------------------------------------------------------------------------------------------------------------------------------------------------------------------------------------------------------------------------------------------------------------------------------------------------------------------------------------------------------------------------------------------------------------------------------------------------------------------------------------------------------------------------------------------------------------------------------------------------------------------------------------------------------------------------------------------------------------------------------------------------------------------------------------------------------------------------------------------------------------------------------------------------------------------|
| neuromedin U receptor 1                                                                                                                                                                                                                                                                                                                                                                                                                                                                                                                                                                                                                                                                                                                                                                                                                                                                                                                                |
| BCL2-like 11 (apoptosis facilitator)                                                                                                                                                                                                                                                                                                                                                                                                                                                                                                                                                                                                                                                                                                                                                                                                                                                                                                                   |
| BCL2-like 11 (apoptosis facilitator)                                                                                                                                                                                                                                                                                                                                                                                                                                                                                                                                                                                                                                                                                                                                                                                                                                                                                                                   |
| Immunoglobulin heavy chain 1a (serum IgG2a)                                                                                                                                                                                                                                                                                                                                                                                                                                                                                                                                                                                                                                                                                                                                                                                                                                                                                                            |
| immunoglobulin heavy chain 1a (serum IgG2a) /// similar to Ig heavy chain V region PJ14 precursor /// similar to Ig heavy chain V region MC101 precursor /// similar to Ig heavy chain V region MC101 precursor /// similar to Ig heavy chain V region MC101 precursor /// similar to Ig heavy chain V region PJ14 precursor /// similar to Ig heavy chain V region PJ14 precursor /// similar to Ig heavy chain V region MC101 precursor /// similar to Ig heavy chain V region MC101 precursor /// similar to Ig heavy chain V region PJ14 precursor /// similar to Ig heavy chain V region MC101 precursor /// similar to Ig heavy chain V region MC101 precursor /// similar to Ig heavy chain V region PJ14 precursor /// similar to Ig heavy chain V region MC101 precursor /// similar to Ig heavy chain V region MC101 precursor /// similar to Ig heavy chain V region MC101 precursor /// similar to Ig heavy chain V region MC101 precursor |
| RIKEN cDNA 1600014C10 gene                                                                                                                                                                                                                                                                                                                                                                                                                                                                                                                                                                                                                                                                                                                                                                                                                                                                                                                             |
| mannoside acetylglucosaminyltransferase 3                                                                                                                                                                                                                                                                                                                                                                                                                                                                                                                                                                                                                                                                                                                                                                                                                                                                                                              |
| fibroblast growth factor 14                                                                                                                                                                                                                                                                                                                                                                                                                                                                                                                                                                                                                                                                                                                                                                                                                                                                                                                            |
| 3-hydroxy-3-methylglutaryl-Coenzyme A reductase                                                                                                                                                                                                                                                                                                                                                                                                                                                                                                                                                                                                                                                                                                                                                                                                                                                                                                        |
| homeo box D9                                                                                                                                                                                                                                                                                                                                                                                                                                                                                                                                                                                                                                                                                                                                                                                                                                                                                                                                           |
| homeo box D12                                                                                                                                                                                                                                                                                                                                                                                                                                                                                                                                                                                                                                                                                                                                                                                                                                                                                                                                          |
| immunoglobulin lambda-like polypeptide 1                                                                                                                                                                                                                                                                                                                                                                                                                                                                                                                                                                                                                                                                                                                                                                                                                                                                                                               |
| immunoglobulin lambda-like polypeptide 1                                                                                                                                                                                                                                                                                                                                                                                                                                                                                                                                                                                                                                                                                                                                                                                                                                                                                                               |
| galanin receptor 2                                                                                                                                                                                                                                                                                                                                                                                                                                                                                                                                                                                                                                                                                                                                                                                                                                                                                                                                     |
| sterol O-acyltransferase 2                                                                                                                                                                                                                                                                                                                                                                                                                                                                                                                                                                                                                                                                                                                                                                                                                                                                                                                             |
| cytoplasmic linker 2                                                                                                                                                                                                                                                                                                                                                                                                                                                                                                                                                                                                                                                                                                                                                                                                                                                                                                                                   |
| proline-serine-threonine phosphatase-interacting protein 2                                                                                                                                                                                                                                                                                                                                                                                                                                                                                                                                                                                                                                                                                                                                                                                                                                                                                             |
| CD83 antigen                                                                                                                                                                                                                                                                                                                                                                                                                                                                                                                                                                                                                                                                                                                                                                                                                                                                                                                                           |
| fibroblast growth factor 7                                                                                                                                                                                                                                                                                                                                                                                                                                                                                                                                                                                                                                                                                                                                                                                                                                                                                                                             |
| sialophorin                                                                                                                                                                                                                                                                                                                                                                                                                                                                                                                                                                                                                                                                                                                                                                                                                                                                                                                                            |
| lymphocyte antigen 6 complex, locus F                                                                                                                                                                                                                                                                                                                                                                                                                                                                                                                                                                                                                                                                                                                                                                                                                                                                                                                  |
| expressed sequence C78549                                                                                                                                                                                                                                                                                                                                                                                                                                                                                                                                                                                                                                                                                                                                                                                                                                                                                                                              |
| MAS1 oncogene                                                                                                                                                                                                                                                                                                                                                                                                                                                                                                                                                                                                                                                                                                                                                                                                                                                                                                                                          |
| nuclear factor I/B                                                                                                                                                                                                                                                                                                                                                                                                                                                                                                                                                                                                                                                                                                                                                                                                                                                                                                                                     |
| gephyrin                                                                                                                                                                                                                                                                                                                                                                                                                                                                                                                                                                                                                                                                                                                                                                                                                                                                                                                                               |
| regulated endocrine-specific protein 18                                                                                                                                                                                                                                                                                                                                                                                                                                                                                                                                                                                                                                                                                                                                                                                                                                                                                                                |
| receptor (calcitonin) activity modifying protein 2                                                                                                                                                                                                                                                                                                                                                                                                                                                                                                                                                                                                                                                                                                                                                                                                                                                                                                     |
| solute carrier family 44, member 2                                                                                                                                                                                                                                                                                                                                                                                                                                                                                                                                                                                                                                                                                                                                                                                                                                                                                                                     |
| membrane-spanning 4-domains, subfamily A, member 1                                                                                                                                                                                                                                                                                                                                                                                                                                                                                                                                                                                                                                                                                                                                                                                                                                                                                                     |
| RIKEN cDNA 1110007L15 gene                                                                                                                                                                                                                                                                                                                                                                                                                                                                                                                                                                                                                                                                                                                                                                                                                                                                                                                             |
| talin 1                                                                                                                                                                                                                                                                                                                                                                                                                                                                                                                                                                                                                                                                                                                                                                                                                                                                                                                                                |
| potassium voltage-gated channel, subfamily Q, member 2                                                                                                                                                                                                                                                                                                                                                                                                                                                                                                                                                                                                                                                                                                                                                                                                                                                                                                 |
| potassium voltage-gated channel, subfamily Q, member 2                                                                                                                                                                                                                                                                                                                                                                                                                                                                                                                                                                                                                                                                                                                                                                                                                                                                                                 |
| RIKEN cDNA C230093N12 gene                                                                                                                                                                                                                                                                                                                                                                                                                                                                                                                                                                                                                                                                                                                                                                                                                                                                                                                             |
| lipolysis stimulated lipoprotein receptor                                                                                                                                                                                                                                                                                                                                                                                                                                                                                                                                                                                                                                                                                                                                                                                                                                                                                                              |
| phosphodiesterase 1A, calmodulin-dependent                                                                                                                                                                                                                                                                                                                                                                                                                                                                                                                                                                                                                                                                                                                                                                                                                                                                                                             |
| proacrosin binding protein                                                                                                                                                                                                                                                                                                                                                                                                                                                                                                                                                                                                                                                                                                                                                                                                                                                                                                                             |
| proacrosin binding protein                                                                                                                                                                                                                                                                                                                                                                                                                                                                                                                                                                                                                                                                                                                                                                                                                                                                                                                             |
| antigen identified by monoclonal antibody Ki 67 /// similar to Antigen KI-67                                                                                                                                                                                                                                                                                                                                                                                                                                                                                                                                                                                                                                                                                                                                                                                                                                                                           |
| MAP/microtubule affinity-regulating kinase 2                                                                                                                                                                                                                                                                                                                                                                                                                                                                                                                                                                                                                                                                                                                                                                                                                                                                                                           |
| MAP/microtubule affinity-regulating kinase 2                                                                                                                                                                                                                                                                                                                                                                                                                                                                                                                                                                                                                                                                                                                                                                                                                                                                                                           |
| sema domain, immunoglobulin domain (Ig), short basic domain, secreted, (semaphorin) 3B                                                                                                                                                                                                                                                                                                                                                                                                                                                                                                                                                                                                                                                                                                                                                                                                                                                                 |
| hematopoietic cell specific Lyn substrate 1                                                                                                                                                                                                                                                                                                                                                                                                                                                                                                                                                                                                                                                                                                                                                                                                                                                                                                            |
| topoisomerase (DNA) II beta                                                                                                                                                                                                                                                                                                                                                                                                                                                                                                                                                                                                                                                                                                                                                                                                                                                                                                                            |
| cytochrome P450, family 3, subfamily a, polypeptide 13                                                                                                                                                                                                                                                                                                                                                                                                                                                                                                                                                                                                                                                                                                                                                                                                                                                                                                 |
| retinoid X receptor interacting protein 110                                                                                                                                                                                                                                                                                                                                                                                                                                                                                                                                                                                                                                                                                                                                                                                                                                                                                                            |
| methyl CpG binding protein 2                                                                                                                                                                                                                                                                                                                                                                                                                                                                                                                                                                                                                                                                                                                                                                                                                                                                                                                           |
| zinc finger protein 444                                                                                                                                                                                                                                                                                                                                                                                                                                                                                                                                                                                                                                                                                                                                                                                                                                                                                                                                |
| RAS p21 protein activator 1                                                                                                                                                                                                                                                                                                                                                                                                                                                                                                                                                                                                                                                                                                                                                                                                                                                                                                                            |
| peroxisomal biogenesis factor 6                                                                                                                                                                                                                                                                                                                                                                                                                                                                                                                                                                                                                                                                                                                                                                                                                                                                                                                        |

|                                                                                                                                                                                 |
|---------------------------------------------------------------------------------------------------------------------------------------------------------------------------------|
| START domain containing 7                                                                                                                                                       |
| Chromatin modifying protein 4B                                                                                                                                                  |
| Chromatin modifying protein 4B                                                                                                                                                  |
| a disintegrin and metallopeptidase domain 5                                                                                                                                     |
| suppressor of cytokine signaling 2                                                                                                                                              |
| procollagen, type XIV, alpha 1                                                                                                                                                  |
| guanine nucleotide binding protein (G protein), gamma 12                                                                                                                        |
| protein tyrosine phosphatase, receptor type, C polypeptide-associated protein                                                                                                   |
| deleted in malignant brain tumors 1                                                                                                                                             |
| ATPase, Na <sup>+</sup> /K <sup>+</sup> transporting, alpha 2 polypeptide                                                                                                       |
| DNA fragmentation factor, alpha subunit                                                                                                                                         |
| centromere autoantigen B /// sperm flagellar 1                                                                                                                                  |
| islet amyloid polypeptide                                                                                                                                                       |
| heat shock protein 4 like                                                                                                                                                       |
| THO complex 3                                                                                                                                                                   |
| interleukin 10 receptor, beta                                                                                                                                                   |
| catenin beta interacting protein 1                                                                                                                                              |
| RAB28, member RAS oncogene family                                                                                                                                               |
| serine (or cysteine) peptidase inhibitor, clade I, member 1                                                                                                                     |
| ADP-ribosylation factor interacting protein 2                                                                                                                                   |
| glutamate-ammonia ligase (glutamine synthetase) /// hypothetical protein LOC671629                                                                                              |
| methyltransferase-like 1                                                                                                                                                        |
| solute carrier family 12, member 2                                                                                                                                              |
| translocation protein 1                                                                                                                                                         |
| zinc finger protein 148                                                                                                                                                         |
| PTC7 protein phosphatase homolog (S. cerevisiae)                                                                                                                                |
| ST8 alpha-N-acetyl-neuraminide alpha-2,8-sialyltransferase 3                                                                                                                    |
| RAB4B, member RAS oncogene family                                                                                                                                               |
| death-associated kinase 2                                                                                                                                                       |
| uncoupling protein 1 (mitochondrial, proton carrier)                                                                                                                            |
| FXVD domain-containing ion transport regulator 7                                                                                                                                |
| Janus kinase 3                                                                                                                                                                  |
| protein kinase C, beta 1                                                                                                                                                        |
| protein kinase C, beta 1                                                                                                                                                        |
| CCR4-NOT transcription complex, subunit 1 /// similar to CCR4-NOT transcription complex, subunit 1 isoform a /// similar to CCR4-NOT transcription complex, subunit 1 isoform a |
| phospholipase A2, group IVA (cytosolic, calcium-dependent)                                                                                                                      |
| brain expressed myelocytomatosis oncogene                                                                                                                                       |
| adaptor-related protein complex 2, beta 1 subunit                                                                                                                               |
| fragile X mental retardation gene 2, autosomal homolog                                                                                                                          |
| microfibrillar associated protein 5                                                                                                                                             |
| microfibrillar associated protein 5                                                                                                                                             |
| adenylate kinase 3 alpha-like 1                                                                                                                                                 |
| germ cell-specific gene 2                                                                                                                                                       |
| RAN binding protein 10                                                                                                                                                          |
| solute carrier family 8 (sodium/calcium exchanger), member 1                                                                                                                    |
| solute carrier family 8 (sodium/calcium exchanger), member 1                                                                                                                    |
| nuclear factor, erythroid derived 2, like 3                                                                                                                                     |
| spindlin                                                                                                                                                                        |
| ring finger protein 138                                                                                                                                                         |
| prolactin-like protein C 1                                                                                                                                                      |
| synaptogyrin 4                                                                                                                                                                  |
| transducer of ErbB-2.1                                                                                                                                                          |
| ghrelin                                                                                                                                                                         |

|                                                                                                                                                                                                                                                                                                                                                                                                                                                                     |
|---------------------------------------------------------------------------------------------------------------------------------------------------------------------------------------------------------------------------------------------------------------------------------------------------------------------------------------------------------------------------------------------------------------------------------------------------------------------|
| CCR4 carbon catabolite repression 4-like (S. cerevisiae)                                                                                                                                                                                                                                                                                                                                                                                                            |
| calcium and integrin binding family member 2                                                                                                                                                                                                                                                                                                                                                                                                                        |
| RuvB-like protein 1                                                                                                                                                                                                                                                                                                                                                                                                                                                 |
| kinesin family member 11                                                                                                                                                                                                                                                                                                                                                                                                                                            |
| pyruvate dehydrogenase E1 alpha 2                                                                                                                                                                                                                                                                                                                                                                                                                                   |
| deoxyguanosine kinase                                                                                                                                                                                                                                                                                                                                                                                                                                               |
| deoxyguanosine kinase                                                                                                                                                                                                                                                                                                                                                                                                                                               |
| tektin 1                                                                                                                                                                                                                                                                                                                                                                                                                                                            |
| FK506 binding protein 2                                                                                                                                                                                                                                                                                                                                                                                                                                             |
| aldehyde dehydrogenase family 3, subfamily A1                                                                                                                                                                                                                                                                                                                                                                                                                       |
| osteoglycin                                                                                                                                                                                                                                                                                                                                                                                                                                                         |
| defensin related cryptdin 5                                                                                                                                                                                                                                                                                                                                                                                                                                         |
| snail homolog 2 (Drosophila)                                                                                                                                                                                                                                                                                                                                                                                                                                        |
| regulator of G-protein signaling 8                                                                                                                                                                                                                                                                                                                                                                                                                                  |
| expressed sequence AA522020                                                                                                                                                                                                                                                                                                                                                                                                                                         |
| sex determining region of Chr Y                                                                                                                                                                                                                                                                                                                                                                                                                                     |
| nasal embryonic LHRH factor                                                                                                                                                                                                                                                                                                                                                                                                                                         |
| cyclin C                                                                                                                                                                                                                                                                                                                                                                                                                                                            |
| aldehyde dehydrogenase family 3, subfamily A2                                                                                                                                                                                                                                                                                                                                                                                                                       |
| claudin 7                                                                                                                                                                                                                                                                                                                                                                                                                                                           |
| mannosidase 2, alpha B1                                                                                                                                                                                                                                                                                                                                                                                                                                             |
| spindlin                                                                                                                                                                                                                                                                                                                                                                                                                                                            |
| ubiquitin-like, containing PHD and RING finger domains, 1                                                                                                                                                                                                                                                                                                                                                                                                           |
| triosephosphate isomerase 1                                                                                                                                                                                                                                                                                                                                                                                                                                         |
| splicing factor 1                                                                                                                                                                                                                                                                                                                                                                                                                                                   |
| keratin complex 2, basic, gene 18                                                                                                                                                                                                                                                                                                                                                                                                                                   |
| ATPase, Ca++ transporting, cardiac muscle, slow twitch 2                                                                                                                                                                                                                                                                                                                                                                                                            |
| acetyl-Coenzyme A acyltransferase 1B                                                                                                                                                                                                                                                                                                                                                                                                                                |
| zinc and ring finger 2                                                                                                                                                                                                                                                                                                                                                                                                                                              |
| ubiquilin 1                                                                                                                                                                                                                                                                                                                                                                                                                                                         |
| microsomal glutathione S-transferase 3                                                                                                                                                                                                                                                                                                                                                                                                                              |
| kit ligand                                                                                                                                                                                                                                                                                                                                                                                                                                                          |
| topoisomerase (DNA) II alpha                                                                                                                                                                                                                                                                                                                                                                                                                                        |
| ATPase, Na+/K+ transporting, beta 3 polypeptide                                                                                                                                                                                                                                                                                                                                                                                                                     |
| UDP glucuronosyltransferase 1 family, polypeptide A2 /// UDP glucuronosyltransferase 1 family, polypeptide A6A /// UDP glycosyltransferase 1 family, polypeptide A10 /// UDP glucuronosyltransferase 1 family, polypeptide A7C /// UDP glucuronosyltransferase 1 family, polypeptide A5 /// UDP glucuronosyltransferase 1 family, polypeptide A9 /// UDP glucuronosyltransferase 1 family, polypeptide A6B /// UDP glucuronosyltransferase 1 family, polypeptide A1 |
| histidine triad nucleotide binding protein 1                                                                                                                                                                                                                                                                                                                                                                                                                        |
| tumor-associated calcium signal transducer 1                                                                                                                                                                                                                                                                                                                                                                                                                        |
| glutathione S-transferase, pi 1                                                                                                                                                                                                                                                                                                                                                                                                                                     |
| CD82 antigen                                                                                                                                                                                                                                                                                                                                                                                                                                                        |
| CD82 antigen                                                                                                                                                                                                                                                                                                                                                                                                                                                        |
| cystatin C                                                                                                                                                                                                                                                                                                                                                                                                                                                          |
| RAB7, member RAS oncogene family                                                                                                                                                                                                                                                                                                                                                                                                                                    |
| protamine 1                                                                                                                                                                                                                                                                                                                                                                                                                                                         |
| ribosomal protein S17                                                                                                                                                                                                                                                                                                                                                                                                                                               |
| retinol dehydrogenase 11                                                                                                                                                                                                                                                                                                                                                                                                                                            |
| retinol dehydrogenase 11                                                                                                                                                                                                                                                                                                                                                                                                                                            |
| NADH dehydrogenase (ubiquinone) Fe-S protein 5                                                                                                                                                                                                                                                                                                                                                                                                                      |
| mitochondrial ribosomal protein L51                                                                                                                                                                                                                                                                                                                                                                                                                                 |
| selenoprotein W, muscle 1                                                                                                                                                                                                                                                                                                                                                                                                                                           |
| guanine nucleotide binding protein, alpha inhibiting 2                                                                                                                                                                                                                                                                                                                                                                                                              |
| guanine nucleotide binding protein, alpha inhibiting 2                                                                                                                                                                                                                                                                                                                                                                                                              |
| guanine nucleotide binding protein, alpha inhibiting 2                                                                                                                                                                                                                                                                                                                                                                                                              |
| prostate tumor over expressed gene 1                                                                                                                                                                                                                                                                                                                                                                                                                                |



|                                                                                                                                                                                                                                                                                                                                   |
|-----------------------------------------------------------------------------------------------------------------------------------------------------------------------------------------------------------------------------------------------------------------------------------------------------------------------------------|
| prostate tumor over expressed gene 1                                                                                                                                                                                                                                                                                              |
| Kruppel-like factor 10                                                                                                                                                                                                                                                                                                            |
| Kruppel-like factor 10                                                                                                                                                                                                                                                                                                            |
| membrane-associated ring finger (C3HC4) 5                                                                                                                                                                                                                                                                                         |
| ---                                                                                                                                                                                                                                                                                                                               |
| LIM motif-containing protein kinase 2                                                                                                                                                                                                                                                                                             |
| S-phase kinase-associated protein 1A                                                                                                                                                                                                                                                                                              |
| peroxiredoxin 2                                                                                                                                                                                                                                                                                                                   |
| CAAX box 1 homolog A (human)                                                                                                                                                                                                                                                                                                      |
| synovial sarcoma translocation, Chromosome 18                                                                                                                                                                                                                                                                                     |
| methylmalonyl-Coenzyme A mutase                                                                                                                                                                                                                                                                                                   |
| RIKEN cDNA 0610040D20 gene                                                                                                                                                                                                                                                                                                        |
| RIKEN cDNA 0610040D20 gene                                                                                                                                                                                                                                                                                                        |
| SEC24 related gene family, member C (S. cerevisiae)                                                                                                                                                                                                                                                                               |
| ubiquinol-cytochrome c reductase (6.4kD) subunit                                                                                                                                                                                                                                                                                  |
| transmembrane protein 41B                                                                                                                                                                                                                                                                                                         |
| splicing factor proline/glutamine rich (polypyrimidine tract binding protein associated)                                                                                                                                                                                                                                          |
| splicing factor proline/glutamine rich (polypyrimidine tract binding protein associated)                                                                                                                                                                                                                                          |
| Kruppel-like factor 4 (gut)                                                                                                                                                                                                                                                                                                       |
| olfactomedin 1                                                                                                                                                                                                                                                                                                                    |
| RIKEN cDNA 9530068E07 gene                                                                                                                                                                                                                                                                                                        |
| ribosomal protein L38                                                                                                                                                                                                                                                                                                             |
| ribosomal protein L38                                                                                                                                                                                                                                                                                                             |
| similar to Splicing factor, arginine/serine-rich 5 (Pre-mRNA splicing factor SRP40) (Insulin-induced growth response protein CL-4) (Delayed-early protein HRS) /// similar to Splicing factor, arginine/serine-rich 5 (Pre-mRNA splicing factor SRP40) (Insulin-induced growth response protein CL-4) (Delayed-early protein HRS) |
| etoposide induced 2.4 mRNA                                                                                                                                                                                                                                                                                                        |
| mitochondrial ribosomal protein L54                                                                                                                                                                                                                                                                                               |
| cytochrome c oxidase, subunit VI a, polypeptide 1                                                                                                                                                                                                                                                                                 |
| MAD2 (mitotic arrest deficient, homolog)-like 1 (yeast)                                                                                                                                                                                                                                                                           |
| neurochondrin                                                                                                                                                                                                                                                                                                                     |
| inhibitor of growth family, member 4                                                                                                                                                                                                                                                                                              |
| polymerase (DNA-directed), delta interacting protein 2                                                                                                                                                                                                                                                                            |
| procollagen, type XV                                                                                                                                                                                                                                                                                                              |
| procollagen, type XVIII, alpha 1                                                                                                                                                                                                                                                                                                  |
| ubiquitin specific peptidase 10                                                                                                                                                                                                                                                                                                   |
| multiple inositol polyphosphate histidine phosphatase 1                                                                                                                                                                                                                                                                           |
| dysbindin (dystrobrevin binding protein 1) domain containing 2                                                                                                                                                                                                                                                                    |
| carboxypeptidase E /// similar to carboxypeptidase E                                                                                                                                                                                                                                                                              |
| carboxypeptidase E /// similar to carboxypeptidase E                                                                                                                                                                                                                                                                              |
| zinc finger protein 289                                                                                                                                                                                                                                                                                                           |
| RIKEN cDNA 4921506J03 gene                                                                                                                                                                                                                                                                                                        |
| palmitoyl-protein thioesterase 1                                                                                                                                                                                                                                                                                                  |
| ribulose-5-phosphate-3-epimerase                                                                                                                                                                                                                                                                                                  |
| apolipoprotein A-II                                                                                                                                                                                                                                                                                                               |
| ---                                                                                                                                                                                                                                                                                                                               |
| casein kinase 1, alpha 1                                                                                                                                                                                                                                                                                                          |
| RIKEN cDNA 2610209M04 gene                                                                                                                                                                                                                                                                                                        |
| HLA-B associated transcript 5                                                                                                                                                                                                                                                                                                     |
| ribosomal protein L14                                                                                                                                                                                                                                                                                                             |
| keratinocyte differentiation associated protein                                                                                                                                                                                                                                                                                   |
| Sec11-like 1 (S. cerevisiae)                                                                                                                                                                                                                                                                                                      |
| TRM1 tRNA methyltransferase 1 homolog (S. cerevisiae)                                                                                                                                                                                                                                                                             |
| ribosomal protein S14 /// similar to ribosomal protein S14                                                                                                                                                         |
| fumarylacetoacetate hydrolase domain containing 1                                                                                                                                                                                                                                                                                 |

|                                                                                                                                                                                                                                                                                                                                                                                                                                                                                                                                                                                                                  |
|------------------------------------------------------------------------------------------------------------------------------------------------------------------------------------------------------------------------------------------------------------------------------------------------------------------------------------------------------------------------------------------------------------------------------------------------------------------------------------------------------------------------------------------------------------------------------------------------------------------|
| fumarylacetoacetate hydrolase domain containing 1                                                                                                                                                                                                                                                                                                                                                                                                                                                                                                                                                                |
| cytochrome c oxidase, subunit VIIc                                                                                                                                                                                                                                                                                                                                                                                                                                                                                                                                                                               |
| cytochrome c oxidase, subunit VIIc                                                                                                                                                                                                                                                                                                                                                                                                                                                                                                                                                                               |
| nucleoporin 85                                                                                                                                                                                                                                                                                                                                                                                                                                                                                                                                                                                                   |
| nucleoporin 85                                                                                                                                                                                                                                                                                                                                                                                                                                                                                                                                                                                                   |
| pericentrin (kendrin)                                                                                                                                                                                                                                                                                                                                                                                                                                                                                                                                                                                            |
| special AT-rich sequence binding protein 1                                                                                                                                                                                                                                                                                                                                                                                                                                                                                                                                                                       |
| citrate synthase                                                                                                                                                                                                                                                                                                                                                                                                                                                                                                                                                                                                 |
| cytochrome c oxidase, subunit VI a, polypeptide 2                                                                                                                                                                                                                                                                                                                                                                                                                                                                                                                                                                |
| bridging integrator 1                                                                                                                                                                                                                                                                                                                                                                                                                                                                                                                                                                                            |
| lectin, galactose binding, soluble 1                                                                                                                                                                                                                                                                                                                                                                                                                                                                                                                                                                             |
| Bcl-associated death promoter                                                                                                                                                                                                                                                                                                                                                                                                                                                                                                                                                                                    |
| complement factor D (adipsin)                                                                                                                                                                                                                                                                                                                                                                                                                                                                                                                                                                                    |
| chloride channel 4-2                                                                                                                                                                                                                                                                                                                                                                                                                                                                                                                                                                                             |
| mitochondrial ribosomal protein L43                                                                                                                                                                                                                                                                                                                                                                                                                                                                                                                                                                              |
| Yip1 interacting factor homolog A (S. cerevisiae)                                                                                                                                                                                                                                                                                                                                                                                                                                                                                                                                                                |
| RIKEN cDNA 2610042O14 gene                                                                                                                                                                                                                                                                                                                                                                                                                                                                                                                                                                                       |
| ATP synthase, H+ transporting, mitochondrial F0 complex, subunit g /// similar to ATP synthase, H+ transporting, mitochondrial F0 complex, subunit G /// similar to ATP synthase, H+ transporting, mitochondrial F0 complex, subunit G /// similar to ATP synthase, H+ transporting, mitochondrial F0 complex, subunit g                                                                                                                                                                                                                                                                                         |
| ---                                                                                                                                                                                                                                                                                                                                                                                                                                                                                                                                                                                                              |
| Murine retrovirus readthrough RNA sequence                                                                                                                                                                                                                                                                                                                                                                                                                                                                                                                                                                       |
| vomeronasal 2, receptor, 1b                                                                                                                                                                                                                                                                                                                                                                                                                                                                                                                                                                                      |
| small proline-rich protein 2B                                                                                                                                                                                                                                                                                                                                                                                                                                                                                                                                                                                    |
| ---                                                                                                                                                                                                                                                                                                                                                                                                                                                                                                                                                                                                              |
| Protease, serine, 29                                                                                                                                                                                                                                                                                                                                                                                                                                                                                                                                                                                             |
| Transcribed locus                                                                                                                                                                                                                                                                                                                                                                                                                                                                                                                                                                                                |
| Myosin IB                                                                                                                                                                                                                                                                                                                                                                                                                                                                                                                                                                                                        |
| RIKEN cDNA 6230416J20 gene                                                                                                                                                                                                                                                                                                                                                                                                                                                                                                                                                                                       |
| small nucleolar RNA, H/ACA box 65 /// ribosomal protein L12 /// similar to 60S ribosomal protein L12 |
| RIKEN cDNA 2810482G21 gene                                                                                                                                                                                                                                                                                                                                                                                                                                                                                                                                                                                       |
| T-cell receptor beta, variable 13                                                                                                                                                                                                                                                                                                                                                                                                                                                                                                                                                                                |
| vav 1 oncogene                                                                                                                                                                                                                                                                                                                                                                                                                                                                                                                                                                                                   |
| L1 cell adhesion molecule                                                                                                                                                                                                                                                                                                                                                                                                                                                                                                                                                                                        |
| ---                                                                                                                                                                                                                                                                                                                                                                                                                                                                                                                                                                                                              |
| adrenergic receptor, alpha 2b                                                                                                                                                                                                                                                                                                                                                                                                                                                                                                                                                                                    |
| histone 1, H1b                                                                                                                                                                                                                                                                                                                                                                                                                                                                                                                                                                                                   |
| adrenergic receptor, alpha 2c                                                                                                                                                                                                                                                                                                                                                                                                                                                                                                                                                                                    |
| ---                                                                                                                                                                                                                                                                                                                                                                                                                                                                                                                                                                                                              |
| natriuretic peptide receptor 3                                                                                                                                                                                                                                                                                                                                                                                                                                                                                                                                                                                   |
| Friend virus susceptibility 1                                                                                                                                                                                                                                                                                                                                                                                                                                                                                                                                                                                    |
| homeo box B13                                                                                                                                                                                                                                                                                                                                                                                                                                                                                                                                                                                                    |
| paired box gene 2                                                                                                                                                                                                                                                                                                                                                                                                                                                                                                                                                                                                |
| glutathione peroxidase 2                                                                                                                                                                                                                                                                                                                                                                                                                                                                                                                                                                                         |
| neuropeptide Y receptor Y6                                                                                                                                                                                                                                                                                                                                                                                                                                                                                                                                                                                       |
| calpain 3                                                                                                                                                                                                                                                                                                                                                                                                                                                                                                                                                                                                        |
| calpain 3                                                                                                                                                                                                                                                                                                                                                                                                                                                                                                                                                                                                        |
| neurogenin 3                                                                                                                                                                                                                                                                                                                                                                                                                                                                                                                                                                                                     |
| histamine receptor H 2                                                                                                                                                                                                                                                                                                                                                                                                                                                                                                                                                                                           |
| heat shock protein 2                                                                                                                                                                                                                                                                                                                                                                                                                                                                                                                                                                                             |
| ventral anterior homeobox containing gene 2                                                                                                                                                                                                                                                                                                                                                                                                                                                                                                                                                                      |
| expressed sequence C79122                                                                                                                                                                                                                                                                                                                                                                                                                                                                                                                                                                                        |

|                                                                                                                                                                                                                                                                                                                                                                                                                                 |
|---------------------------------------------------------------------------------------------------------------------------------------------------------------------------------------------------------------------------------------------------------------------------------------------------------------------------------------------------------------------------------------------------------------------------------|
| expressed sequence C79709                                                                                                                                                                                                                                                                                                                                                                                                       |
| cat eye syndrome chromosome region, candidate 5 homolog (human)                                                                                                                                                                                                                                                                                                                                                                 |
| Chromodomain helicase DNA binding protein 8                                                                                                                                                                                                                                                                                                                                                                                     |
| DNA segment, Chr 18, ERATO Doi 232, expressed                                                                                                                                                                                                                                                                                                                                                                                   |
| ---                                                                                                                                                                                                                                                                                                                                                                                                                             |
| RIKEN cDNA D030022P06 gene                                                                                                                                                                                                                                                                                                                                                                                                      |
| ---                                                                                                                                                                                                                                                                                                                                                                                                                             |
| RIKEN cDNA 4933403M19 gene                                                                                                                                                                                                                                                                                                                                                                                                      |
| coiled-coil domain containing 39                                                                                                                                                                                                                                                                                                                                                                                                |
| immunoglobulin heavy chain (J558 family)                                                                                                                                                                                                                                                                                                                                                                                        |
| kalirin, RhoGEF kinase                                                                                                                                                                                                                                                                                                                                                                                                          |
| cortistatin                                                                                                                                                                                                                                                                                                                                                                                                                     |
| potassium large conductance calcium-activated channel, subfamily M, beta member 1                                                                                                                                                                                                                                                                                                                                               |
| calpain 9 (nCL-4) /// similar to calpain 9 (nCL-4)                                                                                                                                                                                                                                                                                                                                                                              |
| neuregulin 3                                                                                                                                                                                                                                                                                                                                                                                                                    |
| fos-like antigen 1                                                                                                                                                                                                                                                                                                                                                                                                              |
| cytochrome P450, family 27, subfamily b, polypeptide 1                                                                                                                                                                                                                                                                                                                                                                          |
| galanin receptor 1                                                                                                                                                                                                                                                                                                                                                                                                              |
| acyloxyacyl hydrolase                                                                                                                                                                                                                                                                                                                                                                                                           |
| gamma-aminobutyric acid (GABA-C) receptor, subunit rho 2                                                                                                                                                                                                                                                                                                                                                                        |
| prodynorphin                                                                                                                                                                                                                                                                                                                                                                                                                    |
| Burkitt lymphoma receptor 1                                                                                                                                                                                                                                                                                                                                                                                                     |
| procollagen, type XIX, alpha 1                                                                                                                                                                                                                                                                                                                                                                                                  |
| paired-like homeodomain transcription factor 3                                                                                                                                                                                                                                                                                                                                                                                  |
| frizzled homolog 9 (Drosophila)                                                                                                                                                                                                                                                                                                                                                                                                 |
| solute carrier family 1 (high affinity aspartate/glutamate transporter), member 6                                                                                                                                                                                                                                                                                                                                               |
| forkhead box F2                                                                                                                                                                                                                                                                                                                                                                                                                 |
| ST3 beta-galactoside alpha-2,3-sialyltransferase 1                                                                                                                                                                                                                                                                                                                                                                              |
| arachidonate 8-lipoxygenase                                                                                                                                                                                                                                                                                                                                                                                                     |
| RIKEN cDNA 1200016E24 gene                                                                                                                                                                                                                                                                                                                                                                                                      |
| Immunoglobulin heavy chain 1a (serum IgG2a)                                                                                                                                                                                                                                                                                                                                                                                     |
| zinc finger protein 292                                                                                                                                                                                                                                                                                                                                                                                                         |
| sulfotransferase family 3A, member 1                                                                                                                                                                                                                                                                                                                                                                                            |
| similar to mitogen activated protein kinase kinase kinase 5                                                                                                                                                                                                                                                                                                                                                                     |
| catenin (cadherin associated protein), delta 2                                                                                                                                                                                                                                                                                                                                                                                  |
| guanine nucleotide binding protein, alpha transducing 1                                                                                                                                                                                                                                                                                                                                                                         |
| desert hedgehog                                                                                                                                                                                                                                                                                                                                                                                                                 |
| alpha-2-HS-glycoprotein                                                                                                                                                                                                                                                                                                                                                                                                         |
| solute carrier family 7 (cationic amino acid transporter, y+ system), member 6                                                                                                                                                                                                                                                                                                                                                  |
| adenosine A2b receptor                                                                                                                                                                                                                                                                                                                                                                                                          |
| bone morphogenic protein receptor, type II (serine/threonine kinase)                                                                                                                                                                                                                                                                                                                                                            |
| RNA binding motif, single stranded interacting protein 1                                                                                                                                                                                                                                                                                                                                                                        |
| ---                                                                                                                                                                                                                                                                                                                                                                                                                             |
| Transcribed locus                                                                                                                                                                                                                                                                                                                                                                                                               |
| hepatoma derived growth factor-like 1                                                                                                                                                                                                                                                                                                                                                                                           |
| MAP/microtubule affinity-regulating kinase 1                                                                                                                                                                                                                                                                                                                                                                                    |
| Pregnancy specific glycoprotein 19                                                                                                                                                                                                                                                                                                                                                                                              |
| ferritin light chain 1 /// ferritin light chain 2 /// similar to Ferritin light chain 1 (Ferritin L subunit 1) /// similar to Ferritin light chain 1 (Ferritin L subunit 1) /// similar to Ferritin light chain 1 (Ferritin L subunit 1) /// similar to Ferritin light chain 1 (Ferritin L subunit 1) /// similar to Ferritin light chain 1 (Ferritin L subunit 1) /// similar to Ferritin light chain 1 (Ferritin L subunit 1) |
| NK2 transcription factor related, locus 6 (Drosophila)                                                                                                                                                                                                                                                                                                                                                                          |
| RAP2B, member of RAS oncogene family                                                                                                                                                                                                                                                                                                                                                                                            |
| hairless                                                                                                                                                                                                                                                                                                                                                                                                                        |
| src-like adaptor                                                                                                                                                                                                                                                                                                                                                                                                                |
| DEAD (Asp-Glu-Ala-Asp) box polypeptide 10                                                                                                                                                                                                                                                                                                                                                                                       |

|                                                                                                                                                                                                                                                                                                                                                                                                                                                                                                                                                                                                                                                                                                                                                                                                                                                                                                                                                                                                                                                                                                                                                                                                                                                                                                                                                                                                                                                                                                                                                                                                                                                                                                                                                                                                                                                                                                                                                                                                                                                                          |
|--------------------------------------------------------------------------------------------------------------------------------------------------------------------------------------------------------------------------------------------------------------------------------------------------------------------------------------------------------------------------------------------------------------------------------------------------------------------------------------------------------------------------------------------------------------------------------------------------------------------------------------------------------------------------------------------------------------------------------------------------------------------------------------------------------------------------------------------------------------------------------------------------------------------------------------------------------------------------------------------------------------------------------------------------------------------------------------------------------------------------------------------------------------------------------------------------------------------------------------------------------------------------------------------------------------------------------------------------------------------------------------------------------------------------------------------------------------------------------------------------------------------------------------------------------------------------------------------------------------------------------------------------------------------------------------------------------------------------------------------------------------------------------------------------------------------------------------------------------------------------------------------------------------------------------------------------------------------------------------------------------------------------------------------------------------------------|
| regulatory factor X, 1 (influences HLA class II expression)                                                                                                                                                                                                                                                                                                                                                                                                                                                                                                                                                                                                                                                                                                                                                                                                                                                                                                                                                                                                                                                                                                                                                                                                                                                                                                                                                                                                                                                                                                                                                                                                                                                                                                                                                                                                                                                                                                                                                                                                              |
| dickkopf homolog 1 (Xenopus laevis)                                                                                                                                                                                                                                                                                                                                                                                                                                                                                                                                                                                                                                                                                                                                                                                                                                                                                                                                                                                                                                                                                                                                                                                                                                                                                                                                                                                                                                                                                                                                                                                                                                                                                                                                                                                                                                                                                                                                                                                                                                      |
| iduronate 2-sulfatase                                                                                                                                                                                                                                                                                                                                                                                                                                                                                                                                                                                                                                                                                                                                                                                                                                                                                                                                                                                                                                                                                                                                                                                                                                                                                                                                                                                                                                                                                                                                                                                                                                                                                                                                                                                                                                                                                                                                                                                                                                                    |
| iduronate 2-sulfatase                                                                                                                                                                                                                                                                                                                                                                                                                                                                                                                                                                                                                                                                                                                                                                                                                                                                                                                                                                                                                                                                                                                                                                                                                                                                                                                                                                                                                                                                                                                                                                                                                                                                                                                                                                                                                                                                                                                                                                                                                                                    |
| iduronate 2-sulfatase                                                                                                                                                                                                                                                                                                                                                                                                                                                                                                                                                                                                                                                                                                                                                                                                                                                                                                                                                                                                                                                                                                                                                                                                                                                                                                                                                                                                                                                                                                                                                                                                                                                                                                                                                                                                                                                                                                                                                                                                                                                    |
| similar to Ig heavy chain V region B1-8/186-2 precursor /// similar to Ig heavy chain V region 3 precursor /// similar to Ig heavy chain V region VH558 A1/A4 precursor /// similar to Ig heavy chain V region 102 precursor /// similar to Ig heavy chain V region VH558 A1/A4 precursor /// similar to Ig heavy chain V region VH558 A1/A4 precursor /// similar to Ig heavy chain V region 108A precursor /// similar to Ig heavy chain V-I region V35 precursor /// similar to Ig heavy chain V region 3 precursor /// similar to Ig heavy chain V region VH558 B4 precursor /// similar to Ig heavy chain V region 108A precursor /// similar to Ig heavy chain V-I region V35 precursor /// similar to Ig heavy chain V region VH558 A1/A4 precursor /// similar to Ig heavy chain V-I region V35 precursor /// similar to Ig heavy chain V region 102 precursor /// similar to Ig heavy chain V region 3 precursor /// similar to Ig heavy chain V region 3 precursor /// similar to Ig heavy chain V region 108A precursor /// similar to Ig heavy chain V region VH558 A1/A4 precursor /// similar to Ig heavy chain V region 102 precursor /// similar to Ig heavy chain V region 23 precursor /// similar to Ig heavy chain V region 3 precursor /// similar to Ig heavy chain V region 3 precursor /// similar to Ig heavy chain V region VH558 A1/A4 precursor /// similar to Ig heavy chain V region 145 precursor /// similar to Ig heavy chain V region 93G7 precursor /// similar to Ig heavy chain V region VH558 A1/A4 precursor /// similar to Ig heavy chain V region 36-65 /// similar to Ig heavy chain V region VH558 A1/A4 precursor /// similar to Ig heavy chain V region VH558 A1/A4 precursor /// similar to Ig heavy chain V region 102 precursor /// similar to Ig heavy chain V region VH558 A1/A4 precursor /// similar to Ig heavy chain V region 3 precursor /// similar to Ig heavy chain V region 93G7 precursor /// similar to Ig heavy chain V region 93G7 precursor /// similar to Ig heavy chain V region VH558 A1/A4 precursor |
| opioid receptor, kappa 1                                                                                                                                                                                                                                                                                                                                                                                                                                                                                                                                                                                                                                                                                                                                                                                                                                                                                                                                                                                                                                                                                                                                                                                                                                                                                                                                                                                                                                                                                                                                                                                                                                                                                                                                                                                                                                                                                                                                                                                                                                                 |
| ephrin A5                                                                                                                                                                                                                                                                                                                                                                                                                                                                                                                                                                                                                                                                                                                                                                                                                                                                                                                                                                                                                                                                                                                                                                                                                                                                                                                                                                                                                                                                                                                                                                                                                                                                                                                                                                                                                                                                                                                                                                                                                                                                |
| zonadhesin                                                                                                                                                                                                                                                                                                                                                                                                                                                                                                                                                                                                                                                                                                                                                                                                                                                                                                                                                                                                                                                                                                                                                                                                                                                                                                                                                                                                                                                                                                                                                                                                                                                                                                                                                                                                                                                                                                                                                                                                                                                               |
| somatostatin receptor 5                                                                                                                                                                                                                                                                                                                                                                                                                                                                                                                                                                                                                                                                                                                                                                                                                                                                                                                                                                                                                                                                                                                                                                                                                                                                                                                                                                                                                                                                                                                                                                                                                                                                                                                                                                                                                                                                                                                                                                                                                                                  |
| platelet derived growth factor, B polypeptide                                                                                                                                                                                                                                                                                                                                                                                                                                                                                                                                                                                                                                                                                                                                                                                                                                                                                                                                                                                                                                                                                                                                                                                                                                                                                                                                                                                                                                                                                                                                                                                                                                                                                                                                                                                                                                                                                                                                                                                                                            |
| POU domain, class 6, transcription factor 1                                                                                                                                                                                                                                                                                                                                                                                                                                                                                                                                                                                                                                                                                                                                                                                                                                                                                                                                                                                                                                                                                                                                                                                                                                                                                                                                                                                                                                                                                                                                                                                                                                                                                                                                                                                                                                                                                                                                                                                                                              |
| cannabinoid receptor 1 (brain)                                                                                                                                                                                                                                                                                                                                                                                                                                                                                                                                                                                                                                                                                                                                                                                                                                                                                                                                                                                                                                                                                                                                                                                                                                                                                                                                                                                                                                                                                                                                                                                                                                                                                                                                                                                                                                                                                                                                                                                                                                           |
| fibroblast growth factor 13                                                                                                                                                                                                                                                                                                                                                                                                                                                                                                                                                                                                                                                                                                                                                                                                                                                                                                                                                                                                                                                                                                                                                                                                                                                                                                                                                                                                                                                                                                                                                                                                                                                                                                                                                                                                                                                                                                                                                                                                                                              |
| prostaglandin F2 receptor negative regulator                                                                                                                                                                                                                                                                                                                                                                                                                                                                                                                                                                                                                                                                                                                                                                                                                                                                                                                                                                                                                                                                                                                                                                                                                                                                                                                                                                                                                                                                                                                                                                                                                                                                                                                                                                                                                                                                                                                                                                                                                             |
| chemokine (C-C motif) receptor 8                                                                                                                                                                                                                                                                                                                                                                                                                                                                                                                                                                                                                                                                                                                                                                                                                                                                                                                                                                                                                                                                                                                                                                                                                                                                                                                                                                                                                                                                                                                                                                                                                                                                                                                                                                                                                                                                                                                                                                                                                                         |
| melanocortin 5 receptor                                                                                                                                                                                                                                                                                                                                                                                                                                                                                                                                                                                                                                                                                                                                                                                                                                                                                                                                                                                                                                                                                                                                                                                                                                                                                                                                                                                                                                                                                                                                                                                                                                                                                                                                                                                                                                                                                                                                                                                                                                                  |
| gamma-aminobutyric acid (GABA-A) receptor, subunit beta 3                                                                                                                                                                                                                                                                                                                                                                                                                                                                                                                                                                                                                                                                                                                                                                                                                                                                                                                                                                                                                                                                                                                                                                                                                                                                                                                                                                                                                                                                                                                                                                                                                                                                                                                                                                                                                                                                                                                                                                                                                |
| guanine nucleotide binding protein (G protein), gamma 4 subunit                                                                                                                                                                                                                                                                                                                                                                                                                                                                                                                                                                                                                                                                                                                                                                                                                                                                                                                                                                                                                                                                                                                                                                                                                                                                                                                                                                                                                                                                                                                                                                                                                                                                                                                                                                                                                                                                                                                                                                                                          |
| chemokine (C-C motif) receptor 6                                                                                                                                                                                                                                                                                                                                                                                                                                                                                                                                                                                                                                                                                                                                                                                                                                                                                                                                                                                                                                                                                                                                                                                                                                                                                                                                                                                                                                                                                                                                                                                                                                                                                                                                                                                                                                                                                                                                                                                                                                         |
| cone-rod homeobox containing gene                                                                                                                                                                                                                                                                                                                                                                                                                                                                                                                                                                                                                                                                                                                                                                                                                                                                                                                                                                                                                                                                                                                                                                                                                                                                                                                                                                                                                                                                                                                                                                                                                                                                                                                                                                                                                                                                                                                                                                                                                                        |
| polymerase I and transcript release factor                                                                                                                                                                                                                                                                                                                                                                                                                                                                                                                                                                                                                                                                                                                                                                                                                                                                                                                                                                                                                                                                                                                                                                                                                                                                                                                                                                                                                                                                                                                                                                                                                                                                                                                                                                                                                                                                                                                                                                                                                               |
| hyperpolarization-activated, cyclic nucleotide-gated K+ 1                                                                                                                                                                                                                                                                                                                                                                                                                                                                                                                                                                                                                                                                                                                                                                                                                                                                                                                                                                                                                                                                                                                                                                                                                                                                                                                                                                                                                                                                                                                                                                                                                                                                                                                                                                                                                                                                                                                                                                                                                |
| dentin matrix protein 1                                                                                                                                                                                                                                                                                                                                                                                                                                                                                                                                                                                                                                                                                                                                                                                                                                                                                                                                                                                                                                                                                                                                                                                                                                                                                                                                                                                                                                                                                                                                                                                                                                                                                                                                                                                                                                                                                                                                                                                                                                                  |
| integrin beta 3                                                                                                                                                                                                                                                                                                                                                                                                                                                                                                                                                                                                                                                                                                                                                                                                                                                                                                                                                                                                                                                                                                                                                                                                                                                                                                                                                                                                                                                                                                                                                                                                                                                                                                                                                                                                                                                                                                                                                                                                                                                          |
| deubiquitinating enzyme 2                                                                                                                                                                                                                                                                                                                                                                                                                                                                                                                                                                                                                                                                                                                                                                                                                                                                                                                                                                                                                                                                                                                                                                                                                                                                                                                                                                                                                                                                                                                                                                                                                                                                                                                                                                                                                                                                                                                                                                                                                                                |
| extraembryonic, spermatogenesis, homeobox 1                                                                                                                                                                                                                                                                                                                                                                                                                                                                                                                                                                                                                                                                                                                                                                                                                                                                                                                                                                                                                                                                                                                                                                                                                                                                                                                                                                                                                                                                                                                                                                                                                                                                                                                                                                                                                                                                                                                                                                                                                              |
| regulator of G-protein signaling 9                                                                                                                                                                                                                                                                                                                                                                                                                                                                                                                                                                                                                                                                                                                                                                                                                                                                                                                                                                                                                                                                                                                                                                                                                                                                                                                                                                                                                                                                                                                                                                                                                                                                                                                                                                                                                                                                                                                                                                                                                                       |
| paired box gene 4                                                                                                                                                                                                                                                                                                                                                                                                                                                                                                                                                                                                                                                                                                                                                                                                                                                                                                                                                                                                                                                                                                                                                                                                                                                                                                                                                                                                                                                                                                                                                                                                                                                                                                                                                                                                                                                                                                                                                                                                                                                        |
| transient receptor potential cation channel, subfamily C, member 6                                                                                                                                                                                                                                                                                                                                                                                                                                                                                                                                                                                                                                                                                                                                                                                                                                                                                                                                                                                                                                                                                                                                                                                                                                                                                                                                                                                                                                                                                                                                                                                                                                                                                                                                                                                                                                                                                                                                                                                                       |
| amiloride-sensitive cation channel 1, neuronal (degenerin)                                                                                                                                                                                                                                                                                                                                                                                                                                                                                                                                                                                                                                                                                                                                                                                                                                                                                                                                                                                                                                                                                                                                                                                                                                                                                                                                                                                                                                                                                                                                                                                                                                                                                                                                                                                                                                                                                                                                                                                                               |
| sema domain, transmembrane domain (TM), and cytoplasmic domain, (semaphorin) 6B                                                                                                                                                                                                                                                                                                                                                                                                                                                                                                                                                                                                                                                                                                                                                                                                                                                                                                                                                                                                                                                                                                                                                                                                                                                                                                                                                                                                                                                                                                                                                                                                                                                                                                                                                                                                                                                                                                                                                                                          |
| AF4/FMR2 family, member 2                                                                                                                                                                                                                                                                                                                                                                                                                                                                                                                                                                                                                                                                                                                                                                                                                                                                                                                                                                                                                                                                                                                                                                                                                                                                                                                                                                                                                                                                                                                                                                                                                                                                                                                                                                                                                                                                                                                                                                                                                                                |
| chondroadherin                                                                                                                                                                                                                                                                                                                                                                                                                                                                                                                                                                                                                                                                                                                                                                                                                                                                                                                                                                                                                                                                                                                                                                                                                                                                                                                                                                                                                                                                                                                                                                                                                                                                                                                                                                                                                                                                                                                                                                                                                                                           |
| heart and neural crest derivatives expressed transcript 2                                                                                                                                                                                                                                                                                                                                                                                                                                                                                                                                                                                                                                                                                                                                                                                                                                                                                                                                                                                                                                                                                                                                                                                                                                                                                                                                                                                                                                                                                                                                                                                                                                                                                                                                                                                                                                                                                                                                                                                                                |
| amphiregulin                                                                                                                                                                                                                                                                                                                                                                                                                                                                                                                                                                                                                                                                                                                                                                                                                                                                                                                                                                                                                                                                                                                                                                                                                                                                                                                                                                                                                                                                                                                                                                                                                                                                                                                                                                                                                                                                                                                                                                                                                                                             |
| protein kinase C, eta                                                                                                                                                                                                                                                                                                                                                                                                                                                                                                                                                                                                                                                                                                                                                                                                                                                                                                                                                                                                                                                                                                                                                                                                                                                                                                                                                                                                                                                                                                                                                                                                                                                                                                                                                                                                                                                                                                                                                                                                                                                    |
| enhancer of zeste homolog 2 (Drosophila)                                                                                                                                                                                                                                                                                                                                                                                                                                                                                                                                                                                                                                                                                                                                                                                                                                                                                                                                                                                                                                                                                                                                                                                                                                                                                                                                                                                                                                                                                                                                                                                                                                                                                                                                                                                                                                                                                                                                                                                                                                 |
| telomeric repeat binding factor 1                                                                                                                                                                                                                                                                                                                                                                                                                                                                                                                                                                                                                                                                                                                                                                                                                                                                                                                                                                                                                                                                                                                                                                                                                                                                                                                                                                                                                                                                                                                                                                                                                                                                                                                                                                                                                                                                                                                                                                                                                                        |
| solute carrier family 9 (sodium/hydrogen exchanger), member 1                                                                                                                                                                                                                                                                                                                                                                                                                                                                                                                                                                                                                                                                                                                                                                                                                                                                                                                                                                                                                                                                                                                                                                                                                                                                                                                                                                                                                                                                                                                                                                                                                                                                                                                                                                                                                                                                                                                                                                                                            |
| cleavage and polyadenylation factor subunit homolog (S. cerevisiae)                                                                                                                                                                                                                                                                                                                                                                                                                                                                                                                                                                                                                                                                                                                                                                                                                                                                                                                                                                                                                                                                                                                                                                                                                                                                                                                                                                                                                                                                                                                                                                                                                                                                                                                                                                                                                                                                                                                                                                                                      |
| tubulin, gamma 1                                                                                                                                                                                                                                                                                                                                                                                                                                                                                                                                                                                                                                                                                                                                                                                                                                                                                                                                                                                                                                                                                                                                                                                                                                                                                                                                                                                                                                                                                                                                                                                                                                                                                                                                                                                                                                                                                                                                                                                                                                                         |
| tubulin, gamma 2                                                                                                                                                                                                                                                                                                                                                                                                                                                                                                                                                                                                                                                                                                                                                                                                                                                                                                                                                                                                                                                                                                                                                                                                                                                                                                                                                                                                                                                                                                                                                                                                                                                                                                                                                                                                                                                                                                                                                                                                                                                         |
| upstream binding transcription factor, RNA polymerase I                                                                                                                                                                                                                                                                                                                                                                                                                                                                                                                                                                                                                                                                                                                                                                                                                                                                                                                                                                                                                                                                                                                                                                                                                                                                                                                                                                                                                                                                                                                                                                                                                                                                                                                                                                                                                                                                                                                                                                                                                  |
| complement component factor i                                                                                                                                                                                                                                                                                                                                                                                                                                                                                                                                                                                                                                                                                                                                                                                                                                                                                                                                                                                                                                                                                                                                                                                                                                                                                                                                                                                                                                                                                                                                                                                                                                                                                                                                                                                                                                                                                                                                                                                                                                            |
| microtubule-associated protein 1 B                                                                                                                                                                                                                                                                                                                                                                                                                                                                                                                                                                                                                                                                                                                                                                                                                                                                                                                                                                                                                                                                                                                                                                                                                                                                                                                                                                                                                                                                                                                                                                                                                                                                                                                                                                                                                                                                                                                                                                                                                                       |

|                                                                                                            |
|------------------------------------------------------------------------------------------------------------|
| exostoses (multiple) 2                                                                                     |
| presenilin 2                                                                                               |
| laminin, alpha 5 /// similar to Laminin alpha-5 chain precursor                                            |
| zinc finger and BTB domain containing 17                                                                   |
| poliovirus receptor-related 2                                                                              |
| poliovirus receptor-related 2                                                                              |
| tight junction protein 1                                                                                   |
| tyrosine kinase receptor 1                                                                                 |
| mesenchyme homeobox 2                                                                                      |
| X-ray repair complementing defective repair in Chinese hamster cells 1                                     |
| carboxyl ester lipase                                                                                      |
| RIKEN cDNA 2410004N11 gene                                                                                 |
| esterase 31                                                                                                |
| calponin 1                                                                                                 |
| hippocalcin                                                                                                |
| CD19 antigen                                                                                               |
| Tial1 cytotoxic granule-associated RNA binding protein-like 1                                              |
| coiled-coil domain containing 95                                                                           |
| coiled-coil domain containing 95                                                                           |
| TATA box binding protein                                                                                   |
| RAR-related orphan receptor gamma                                                                          |
| chitinase 3-like 1                                                                                         |
| ral guanine nucleotide dissociation stimulator-like 2                                                      |
| RNA, U3 small nucleolar interacting protein 2                                                              |
| numb gene homolog (Drosophila)                                                                             |
| kit oncogene                                                                                               |
| matrix metallopeptidase 9                                                                                  |
| mast cell protease 2                                                                                       |
| adenylate kinase 3 alpha-like 1                                                                            |
| mitogen activated protein kinase kinase 4                                                                  |
| cell division cycle 2-like 1                                                                               |
| Kinesin family member 2A                                                                                   |
| ---                                                                                                        |
| vitamin D receptor                                                                                         |
| vitamin D receptor                                                                                         |
| D-2-hydroxyglutarate dehydrogenase /// similar to CG3835-PA, isoform A /// similar to CG3835-PA, isoform A |
| protein tyrosine phosphatase, non-receptor type 21                                                         |
| tryptophan hydroxylase 1                                                                                   |
| potassium inwardly-rectifying channel, subfamily J, member 15                                              |
| potassium inwardly-rectifying channel, subfamily J, member 15                                              |
| protein-kinase, interferon-inducible double stranded RNA dependent inhibitor, repressor of (P58 repressor) |
| fatty acid binding protein 6, ileal (gastrotropin)                                                         |
| mitogen activated protein kinase 14                                                                        |
| cytochrome P450, family 1, subfamily b, polypeptide 1                                                      |
| homeo box C6                                                                                               |
| guanine nucleotide binding protein, alpha q polypeptide                                                    |
| nuclear factor of kappa light chain gene enhancer in B-cells inhibitor, beta                               |
| ELK3, member of ETS oncogene family                                                                        |
| thioredoxin reductase 1                                                                                    |
| golgi SNAP receptor complex member 2                                                                       |
| zinc finger protein 574                                                                                    |
| dymeclin                                                                                                   |
| retinoblastoma binding protein 6                                                                           |

|                                                                             |
|-----------------------------------------------------------------------------|
| interleukin 17 receptor A                                                   |
| interleukin 17 receptor A                                                   |
| alanyl (membrane) aminopeptidase                                            |
| cell death-inducing DNA fragmentation factor, alpha subunit-like effector A |
| centrin 1                                                                   |
| plakophilin 1                                                               |
| prostaglandin E receptor 1 (subtype EP1) /// protein kinase N1              |
| prostaglandin E receptor 1 (subtype EP1)                                    |
| zinc finger, matrin-like                                                    |
