# Supplementary material
Source: publisher figshare collection journal article supplement (https://karger.figshare.com/articles/dataset/_/5104510)
Supplement: Supplementary file 2 [file 1]

Archive with 5 entries (5 files):
- Suppl_TableS1A.pdf
- Suppl_TableS1B.pdf
- Suppl_TableS2A.pdf
- Suppl_TableS2B.pdf
- Suppl_TablesS1-2_Legend.pdf
