# Supplementary material
Source: publisher figshare collection journal article supplement (https://karger.figshare.com/articles/dataset/_/5104510)
Supplement: Supplementary file 2 [file 1 › Suppl_TableS1A.pdf]

| Affymetrix<br>Probe Set ID | WT      | WT      | WT      | WT      | KO      | KO      | KO      | KO      | T-Test (Excel) | Mean WT  | Mean KO  | Delta | Fold Change<br>P1 (Excel) | T-Test P1      | Fold Change    |        |
|----------------------------|---------|---------|---------|---------|---------|---------|---------|---------|----------------|----------|----------|-------|---------------------------|----------------|----------------|--------|
|                            | UCF_2_  | UCF_3_  | UCF_4_  | UCF_16  | UCF_5_  | UCF_6_  | UCF_14  | UCF_15  |                |          |          |       |                           | Pvalue         | P1             |        |
|                            | U74Av2_ | U74Av2_ | U74Av2_ | U74Av2_ | U74Av2_ | U74Av2_ | U74Av2_ | U74Av2_ |                |          |          |       |                           | (Expressionist | (Expressionist |        |
| Signal                     | Signal  | Signal  | Signal  | Signal  | Signal  | Signal  | Signal  | Signal  |                |          |          |       | )                         | )              |                |        |
| 100001_at                  | 5.5     | 29.9    | 7.8     | 28.4    | 29.5    | 12      | 4.5     | 6.5     | 0.601198946    | 17.9     | 13.125   |       | 4.775                     | 1.363809524    | 0.6149         | -1.375 |
| 100002_at                  | 63.2    | 66.4    | 79.1    | 41.4    | 41.7    | 74.9    | 110.1   | 100.4   | 0.318834122    | 62.525   | 81.775   |       | 19.25                     | 0.764597982    | 0.4073         | 1.259  |
| 100003_at                  | 45      | 36.4    | 51      | 56.3    | 33.1    | 48.7    | 16.4    | 45.7    | 0.246715252    | 47.175   | 35.975   |       | 11.2                      | 1.311327311    | 0.249          | -1.405 |
| 100004_at                  | 337.8   | 299.4   | 390.5   | 354.3   | 397.5   | 346.2   | 337     | 477.1   | 0.292665198    | 345.5    | 389.45   |       | 43.95                     | 0.887148543    | 0.2819         | 1.121  |
| 100005_at                  | 638.1   | 731.7   | 627.5   | 526.8   | 479.4   | 865.5   | 525.7   | 529.1   | 0.767276052    | 631.025  | 599.925  |       | 31.1                      | 1.051839813    | 0.6445         | -1.075 |
| 100006_at                  | 276     | 295.2   | 312.8   | 325.1   | 222.9   | 219.3   | 333.7   | 248.7   | 0.184735281    | 302.275  | 256.15   |       | 46.125                    | 1.180070271    | 0.1355         | -1.195 |
| 100007_at                  | 665.8   | 645     | 828.4   | 783.5   | 621     | 762.1   | 648.1   | 732.6   | 0.505495021    | 730.675  | 690.95   |       | 39.725                    | 1.057493306    | 0.5161         | -1.055 |
| 100009_r_at                | 51.8    | 44.3    | 79.1    | 165.8   | 82      | 121.9   | 132     | 123.6   | 0.380506265    | 85.25    | 114.875  |       | 29.625                    | 0.74211099     | 0.2276         | 1.526  |
| 100010_at                  | 66.4    | 135.1   | 134.6   | 208.5   | 100.4   | 102.6   | 153     | 210     | 0.895084906    | 136.15   | 141.5    |       | 5.35                      | 0.962190813    | 0.8246         | 1.071  |
| 100011_at                  | 264.1   | 229.2   | 243.3   | 389.6   | 243.1   | 245.9   | 336.5   | 318.5   | 0.923237747    | 281.55   | 286      |       | 4.45                      | 0.984440559    | 0.8567         | 1.028  |
| 100012_at                  | 47.8    | 33.6    | 251.5   | 46      | 85.5    | 62.3    | 151.4   | 122.8   | 0.85704682     | 94.725   | 105.5    |       | 10.775                    | 0.897867299    | 0.4307         | 1.519  |
| 100013_at                  | 290.6   | 306.1   | 249.8   | 196.5   | 261.4   | 288.1   | 248.4   | 315.2   | 0.567477517    | 260.75   | 278.275  |       | 17.525                    | 0.937022729    | 0.5288         | 1.078  |
| 100014_at                  | 299     | 273     | 305.1   | 350     | 378.2   | 242.9   | 268     | 276.6   | 0.670533494    | 306.775  | 291.425  |       | 15.35                     | 1.052672214    | 0.5905         | -1.064 |
| 100015_at                  | 330.9   | 249.8   | 336     | 361     | 368.2   | 229.9   | 442.9   | 372.1   | 0.536045938    | 319.425  | 353.275  |       | 33.85                     | 0.904182294    | 0.6293         | 1.086  |
| 100016_at                  | 896.8   | 919.3   | 943.1   | 1144.4  | 997.9   | 867.2   | 1004.4  | 1081    | 0.876617829    | 975.9    | 987.625  |       | 11.725                    | 0.988128085    | 0.8569         | 1.014  |
| 100017_at                  | 78.5    | 57.6    | 56      | 68.1    | 45.4    | 73.4    | 52.5    | 80.4    | 0.837245806    | 65.05    | 62.925   |       | 2.125                     | 1.033770362    | 0.7592         | -1.052 |
| 100018_at                  | 120.8   | 123     | 129.1   | 203.7   | 138.3   | 97.3    | 130.9   | 128.3   | 0.40080437     | 144.15   | 123.7    |       | 20.45                     | 1.165319321    | 0.3883         | -1.147 |
| 100019_at                  | 999.2   | 1153.1  | 1059.2  | 1036.1  | 1202    | 1224.7  | 1471.4  | 1156.9  | 0.057226616    | 1061.9   | 1263.75  |       | 201.85                    | 0.840276954    | 0.03205        | 1.186  |
| 100020_at                  | 814.1   | 731.1   | 760.9   | 883.4   | 581.1   | 749.9   | 621.2   | 737.5   | 0.061063148    | 797.375  | 672.425  |       | 124.95                    | 1.18581998     | 0.06116        | -1.19  |
| 100021_at                  | 16.4    | 8.7     | 15.8    | 11      | 31.3    | 29.1    | 10.2    | 37.2    | 0.092069996    | 12.975   | 26.95    |       | 13.975                    | 0.481447124    | 0.09276        | 1.934  |
| 100022_at                  | 247     | 218.4   | 179.5   | 236.8   | 153.6   | 186.1   | 124.4   | 227.3   | 0.131252119    | 220.425  | 172.85   |       | 47.575                    | 1.275238646    | 0.1272         | -1.298 |
| 100023_at                  | 209.4   | 164.1   | 215.1   | 251.1   | 128.1   | 131.2   | 183.9   | 170.9   | 0.049804517    | 209.925  | 153.525  |       | 56.4                      | 1.367366878    | 0.04835        | -1.369 |
| 100024_at                  | 225.2   | 200.6   | 382     | 446.8   | 469     | 279.7   | 316.7   | 377.1   | 0.545205401    | 313.65   | 360.625  |       | 46.975                    | 0.869740035    | 0.4626         | 1.194  |
| 100026_at                  | 196     | 51.9    | 173.3   | 205.6   | 232.2   | 213.7   | 196.9   | 204.4   | 0.219742508    | 156.7    | 211.8    |       | 55.1                      | 0.739848914    | 0.2433         | 1.532  |
| 100027_s_at                | 932.1   | 740.5   | 777.6   | 792     | 700.3   | 769.9   | 705.6   | 738.4   | 0.144538879    | 810.55   | 728.55   |       | 82                        | 1.11255233     | 0.1063         | -1.109 |
| 100028_r_at                | 80.5    | 60.9    | 118.6   | 108.3   | 41      | 108.9   | 89.8    | 122.2   | 0.944862154    | 92.075   | 90.475   |       | 1.6                       | 1.017684443    | 0.8356         | -1.065 |
| 100029_at                  | 1352.7  | 1015.5  | 1350.8  | 969.8   | 879.1   | 1008.8  | 1065.1  | 999.8   | 0.176445723    | 1172.2   | 988.2    |       | 184                       | 1.186197126    | 0.1528         | -1.175 |
| 100030_at                  | 22.7    | 58.9    | 14.1    | 16.2    | 35.9    | 32.6    | 11.8    | 18.3    | 0.792581096    | 27.975   | 24.65    |       | 3.325                     | 1.134888438    | 0.9155         | -1.047 |
| 100032_at                  | 573.4   | 696.2   | 734.3   | 994.6   | 509.1   | 539     | 1058.7  | 1087.4  | 0.799194976    | 749.625  | 798.55   |       | 48.925                    | 0.938732703    | 0.9351         | 1.02   |
| 100033_at                  | 677.7   | 589.1   | 699.9   | 895.6   | 702     | 726.6   | 820.8   | 752.4   | 0.642655997    | 715.575  | 750.45   |       | 34.875                    | 0.953527883    | 0.5607         | 1.059  |
| 100034_at                  | 2       | 4.8     | 2.4     | 3.7     | 2.5     | 4.1     | 3.3     | 2.3     | 0.826628617    | 3.225    | 3.05     |       | 0.175                     | 1.057377049    | 0.9271         | -1.023 |
| 100035_at                  | 34.1    | 27.3    | 16.2    | 16.7    | 19.7    | 37.2    | 13.8    | 24.7    | 0.968163445    | 23.575   | 23.85    |       | 0.275                     | 0.988469602    | 0.9888         | 1.004  |
| 100037_at                  | 371.4   | 516.8   | 557.1   | 380.5   | 342.7   | 399.6   | 469.7   | 390.6   | 0.351878358    | 456.45   | 400.65   |       | 55.8                      | 1.13927368     | 0.3626         | -1.128 |
| 100039_at                  | 2055.2  | 2408.1  | 1538.6  | 2028.8  | 2662.9  | 2632.6  | 2132.5  | 1612.1  | 0.443466272    | 2007.675 | 2260.025 |       | 252.35                    | 0.888341943    | 0.4866         | 1.118  |
| 100040_at                  | 278.6   | 479.8   | 461.9   | 496.1   | 544.9   | 434.5   | 433.2   | 562.6   | 0.337903909    | 429.1    | 493.8    |       | 64.7                      | 0.868975294    | 0.3423         | 1.172  |
| 100041_at                  | 1677.7  | 1514.8  | 1712.6  | 1869.3  | 1583.2  | 1421.9  | 1641    | 1737.1  | 0.358349168    | 1693.6   | 1595.8   |       | 97.8                      | 1.061285875    | 0.3637         | -1.061 |
| 100042_at                  | 459.7   | 442.3   | 398.3   | 396.8   | 495.9   | 518.7   | 357.9   | 452.7   | 0.455175329    | 424.275  | 456.3    |       | 32.025                    | 0.929815911    | 0.5009         | 1.067  |
| 100043_f_at                | 185.7   | 116.6   | 102.1   | 127.7   | 111.9   | 177.3   | 86.1    | 126.8   | 0.786991865    | 133.025  | 125.525  |       | 7.5                       | 1.059749054    | 0.7479         | -1.069 |
| 100044_at                  | 243     | 211.8   | 370.7   | 371.4   | 161.1   | 252.4   | 251     | 282.8   | 0.262728687    | 299.225  | 236.825  |       | 62.4                      | 1.263485696    | 0.2838         | -1.252 |
| 100046_at                  | 1865.2  | 1465    | 1565.6  | 1668.7  | 1229.1  | 1594.1  | 1334.4  | 1224.3  | 0.051277001    | 1641.125 | 1345.475 |       | 295.65                    | 1.219736524    | 0.04682        | -1.222 |
| 100047_at                  | 12.7    | 5.4     | 3.1     | 8       | 5.8     | 11      | 3.9     | 6       | 0.815814689    | 7.3      | 6.675    |       | 0.625                     | 1.093632959    | 0.939          | 1.03   |
| 100048_at                  | 198.1   | 154.1   | 185.1   | 191.2   | 144.5   | 174     | 239.3   | 219.6   | 0.6308443      | 182.125  | 194.35   |       | 12.225                    | 0.937098019    | 0.7076         | 1.051  |
| 100049_at                  | 9.9     | 1.8     | 2.8     | 2.4     | 3       | 2.9     | 2.3     | 2.2     | 0.456912167    | 4.225    | 2.6      |       | 1.625                     | 1.625          | 0.5678         | -1.265 |
| 100050_at                  | 1128.8  | 1217.4  | 1010.1  | 1073.4  | 1121    | 1297.9  | 1435    | 1073.1  | 0.249019672    | 1107.425 | 1231.75  |       | 124.325                   | 0.899066369    | 0.2375         | 1.107  |
| 100051_at                  | 1443.8  | 1404.5  | 1242.3  | 1310    | 929.5   | 1791.9  | 1294.8  | 1261.6  | 0.876634624    | 1350.15  | 1319.45  |       | 30.7                      | 1.02326727     | 0.7391         | -1.049 |
| 100052_at                  | 6.5     | 6.4     | 5.8     | 5.7     | 4.2     | 6.4     | 12.6    | 7.2     | 0.463221133    | 6.1      | 7.6      |       | 1.5                       | 0.802631579    | 0.557          | 1.152  |
| 100054_s_at                | 390.6   | 378.4   | 445.7   | 435.7   | 278.5   | 317     | 362.8   | 373.5   | 0.029614226    | 412.6    | 332.95   |       | 79.65                     | 1.239225109    | 0.03189        | -1.245 |
| 100056_at                  | 1013.9  | 763.2   | 823.7   | 782.3   | 745.6   | 945.4   | 833.6   | 891.6   | 0.912074996    | 845.775  | 854.05   |       | 8.275                     | 0.990310872    | 0.8859         | 1.012  |
| 100057_at                  | 1207.6  | 1493.8  | 1062.3  | 1045.3  | 1413.5  | 1088.3  | 1159.8  | 1119.1  | 0.957764064    | 1202.25  | 1195.175 |       | 7.075                     | 1.005919635    | 0.9939         | 1.001  |
| 100058_at                  | 297     | 291.8   | 353.4   | 289     | 304.6   | 297.3   | 280.1   | 254.4   | 0.261185097    | 307.8    | 284.1    |       | 23.7                      | 1.083421331    | 0.2508         | -1.082 |
| 100059_at                  | 1563.2  | 1556.5  | 1493.4  | 1016.8  | 1242.5  | 1306.6  | 1081.7  | 1033.6  | 0.16804044     | 1407.475 | 1166.1   |       | 241.375                   | 1.206993397    | 0.1821         | -1.194 |
| 100060_i_at                | 4.8     | 1.7     | 2       | 7.8     | 8.2     | 1.5     | 0.7     | 3.1     | 0.761998182    | 4.075    | 3.375    |       | 0.7                       | 1.207407407    | 0.5585         | -1.474 |



|             |         |         |         |         |         |         |         |         |             |           |          |          |             |           |        |
|-------------|---------|---------|---------|---------|---------|---------|---------|---------|-------------|-----------|----------|----------|-------------|-----------|--------|
| 100061_f_at | 58.4    | 66.4    | 34.7    | 74.9    | 107.6   | 139.9   | 75.6    | 61.9    | 0.118541534 | 58.6      | 96.25    | 37.65    | 0.608831169 | 0.09826   | 1.626  |
| 100062_at   | 786.7   | 835.7   | 1137.9  | 1021.4  | 842.2   | 767.6   | 1003.4  | 904.2   | 0.52090092  | 945.425   | 879.35   | 66.075   | 1.075140729 | 0.5446    | -1.068 |
| 100064_f_at | 10097.2 | 10630.2 | 8068.8  | 9205.5  | 7181.6  | 8206.2  | 6929    | 7849.9  | 0.030753884 | 9500.425  | 7541.675 | 1958.75  | 1.25972347  | 0.01943   | -1.256 |
| 100065_r_at | 1129.1  | 1446.4  | 1895.4  | 1888.8  | 1285.6  | 967.6   | 1224.8  | 1310.4  | 0.123078165 | 1589.925  | 1197.1   | 392.825  | 1.328147189 | 0.1084    | -1.308 |
| 100066_at   | 1219.8  | 1023.8  | 1127.7  | 1153.4  | 1136    | 1074.2  | 1128.4  | 1067    | 0.538873389 | 1131.175  | 1101.4   | 29.775   | 1.027033775 | 0.5529    | -1.025 |
| 100067_at   | 8       | 15.7    | 9.8     | 11.2    | 9.3     | 14.2    | 13.1    | 16.4    | 0.385465832 | 11.175    | 13.25    | 2.075    | 0.843396226 | 0.3725    | 1.197  |
| 100068_at   | 14348.8 | 16792.8 | 12001.2 | 13558.1 | 15506.4 | 15413.9 | 17390.7 | 17041.4 | 0.11886786  | 14175.225 | 16338.1  | 2162.875 | 0.867617716 | 0.1012    | 1.159  |
| 100069_at   | 60.2    | 87.4    | 75.6    | 79.8    | 91.5    | 127.8   | 68.8    | 73.5    | 0.370620798 | 75.75     | 90.4     | 14.65    | 0.837942478 | 0.3689    | 1.169  |
| 100071_at   | 11      | 67.7    | 62.2    | 77      | 32      | 20.9    | 57.4    | 12.3    | 0.235157833 | 54.475    | 30.65    | 23.825   | 1.777324633 | 0.4051    | -1.657 |
| 100072_at   | 1194.7  | 1082.4  | 960.1   | 835.6   | 1176.3  | 1078    | 795.1   | 1019.6  | 0.993503632 | 1018.2    | 1017.25  | 0.95     | 1.00093389  | 0.9846    | 1.002  |
| 100073_at   | 505.4   | 525.8   | 390.4   | 428.2   | 598.9   | 371.9   | 441.2   | 417.8   | 0.935367396 | 462.45    | 457.45   | 5        | 1.010930156 | 0.8781    | -1.02  |
| 100074_at   | 1419.4  | 1771.2  | 2694.6  | 1059.3  | 1970    | 1788    | 1856.5  | 843.6   | 0.790748858 | 1736.125  | 1614.525 | 121.6    | 1.075316269 | 0.8224    | -1.068 |
| 100078_at   | 22.2    | 19.6    | 190     | 25.8    | 145.8   | 201.6   | 25.6    | 27.8    | 0.576933055 | 64.4      | 100.2    | 35.8     | 0.642714571 | 0.4823    | 1.771  |
| 100079_at   | 3082.7  | 3786.9  | 2609.5  | 2345.5  | 3382.9  | 2824.9  | 2438.8  | 2437.1  | 0.651073544 | 2956.15   | 2770.925 | 185.225  | 1.066845909 | 0.6749    | -1.059 |
| 100080_at   | 20.4    | 26.7    | 39.2    | 13.6    | 18.7    | 20.2    | 11.1    | 13.9    | 0.200185423 | 24.975    | 15.975   | 9        | 1.563380282 | 0.178     | -1.493 |
| 100081_at   | 516.1   | 498.6   | 659.6   | 734.4   | 940.5   | 620.3   | 901.6   | 763.2   | 0.071712712 | 602.175   | 806.4    | 204.225  | 0.746744792 | 0.07106   | 1.34   |
| 100082_at   | 268.4   | 138     | 150.9   | 163.9   | 161.6   | 224.8   | 176.5   | 174.3   | 0.908815312 | 180.3     | 184.3    | 4        | 0.978296256 | 0.7732    | 1.051  |
| 100084_at   | 381.7   | 456.1   | 467.9   | 553.6   | 439.4   | 437.5   | 553     | 513     | 0.66142404  | 464.825   | 485.725  | 20.9     | 0.956971537 | 0.6376    | 1.049  |
| 100085_at   | 82.7    | 39.5    | 11.4    | 40.7    | 65.6    | 42.5    | 32.5    | 71.6    | 0.608830171 | 43.575    | 53.05    | 9.475    | 0.82139491  | 0.4526    | 1.437  |
| 100086_at   | 1080    | 797     | 797.9   | 877.7   | 858.4   | 1055    | 1028.9  | 984.9   | 0.291139555 | 888.15    | 981.8    | 93.65    | 0.904613974 | 0.2629    | 1.111  |
| 100088_at   | 1207    | 1586.9  | 1888.7  | 1999.7  | 1953.7  | 1636    | 1724    | 1943.8  | 0.499233526 | 1670.575  | 1814.375 | 143.8    | 0.920744058 | 0.4512    | 1.103  |
| 100089_at   | 1859.8  | 2083.3  | 2028.1  | 2161.2  | 2295    | 2126.5  | 2180.5  | 2600.1  | 0.083666688 | 2033.1    | 2300.525 | 267.425  | 0.883754795 | 0.0683    | 1.13   |
| 100091_at   | 2480    | 2176.4  | 2409.8  | 2015    | 2139    | 2511.2  | 2212.4  | 2013.3  | 0.744601475 | 2270.3    | 2218.975 | 51.325   | 1.023130049 | 0.7441    | 1.023  |
| 100093_at   | 952.1   | 803.9   | 1195.1  | 1296.5  | 738.7   | 880.6   | 1079.7  | 1003    | 0.356274229 | 1061.9    | 925.5    | 136.4    | 1.147379795 | 0.3785    | -1.139 |
| 100094_at   | 1312    | 1389.8  | 1411    | 1455.8  | 1346.8  | 1193.7  | 1253.2  | 1391.3  | 0.132210988 | 1392.15   | 1296.25  | 95.9     | 1.073982642 | 0.127     | -1.075 |
| 100095_at   | 2055.1  | 1653.1  | 3448    | 2750.4  | 2206.4  | 2262.7  | 2020.3  | 2222    | 0.506390259 | 2476.65   | 2177.85  | 298.8    | 1.137199532 | 0.5987    | -1.095 |
| 100099_at   | 1603.8  | 1511.2  | 1452    | 1131    | 1404    | 1740.5  | 1227.3  | 1237.7  | 0.893160751 | 1424.5    | 1402.375 | 22.125   | 1.015776807 | 0.8811    | 1.018  |
| 100100_at   | 50.9    | 47.8    | 44.1    | 38.8    | 36.1    | 48      | 51.1    | 47.2    | 0.963504022 | 45.4      | 45.6     | 0.2      | 0.995614035 | 0.9955    | 1.001  |
| 100101_at   | 1799.6  | 1617.9  | 1407.9  | 1364.8  | 1748.2  | 1556.1  | 1436.7  | 1506.1  | 0.910610423 | 1547.55   | 1561.775 | 14.225   | 0.990891774 | 0.8737    | 1.013  |
| 100103_f_at | 399.2   | 272.7   | 308.5   | 452.7   | 373     | 406.3   | 413     | 351.8   | 0.562009913 | 358.275   | 386.025  | 27.75    | 0.928113464 | 0.477     | 1.097  |
| 100104_r_at | 42.1    | 25.5    | 19.1    | 29.9    | 19.5    | 41.1    | 26.9    | 18.4    | 0.720606638 | 29.15     | 26.475   | 2.675    | 1.101038716 | 0.6696    | -1.117 |
| 100106_at   | 49.8    | 51.4    | 96.2    | 43.8    | 199.6   | 150.4   | 35      | 45.7    | 0.329789624 | 60.3      | 107.675  | 47.375   | 0.560018574 | 0.4532    | 1.452  |
| 100109_s_at | 9.5     | 26.7    | 30.5    | 32      | 31.7    | 9.6     | 19.7    | 33.9    | 0.905425799 | 24.675    | 23.725   | 0.95     | 1.04004215  | 0.9071    | -1.051 |
| 100112_at   | 623     | 776     | 936     | 519.5   | 722.2   | 745.8   | 498.9   | 808.9   | 0.868284338 | 713.625   | 693.95   | 19.675   | 1.028352187 | 0.9104    | 1.02   |
| 100113_s_at | 398.5   | 451     | 589.6   | 447.5   | 593.3   | 341.6   | 592     | 597.5   | 0.464970725 | 471.65    | 531.1    | 59.45    | 0.888062512 | 0.5458    | 1.109  |
| 100115_at   | 748.4   | 1119.8  | 924.1   | 988.8   | 888     | 980.3   | 740.8   | 816.2   | 0.37922302  | 945.275   | 856.325  | 88.95    | 1.103874113 | 0.399     | -1.098 |
| 100116_at   | 1126.9  | 1462.8  | 1227.8  | 1237.5  | 1628.9  | 1178.8  | 1275.2  | 1217.6  | 0.643521492 | 1263.75   | 1325.125 | 61.375   | 0.953683615 | 0.6509    | 1.044  |
| 100117_at   | 32.6    | 34.3    | 12.4    | 10.8    | 4.9     | 12.4    | 6.1     | 8.8     | 0.102928626 | 22.525    | 8.05     | 14.475   | 2.798136646 | 0.04139   | -2.607 |
| 100120_at   | 188.2   | 233.2   | 265.7   | 374.7   | 292.7   | 264     | 439.7   | 392.8   | 0.203520049 | 265.45    | 347.3    | 81.85    | 0.764324791 | 0.1877    | 1.322  |
| 100122_at   | 231.2   | 279.3   | 240.3   | 266     | 314.6   | 327.6   | 379.2   | 415.4   | 0.013297045 | 254.2     | 359.2    | 105      | 0.707683742 | 0.00462   | 1.408  |
| 100123_f_at | 7661.1  | 9721.3  | 7583.5  | 8173.6  | 7918.8  | 6380.7  | 9359.7  | 8552.9  | 0.782900171 | 8284.875  | 8053.025 | 231.85   | 1.028790423 | 0.7522    | -1.034 |
| 100124_r_at | 1892.2  | 1757.4  | 2213.3  | 2099    | 2224.5  | 2053.6  | 2206.3  | 2160    | 0.196300565 | 1990.475  | 2161.1   | 170.625  | 0.921047152 | 0.1685    | 1.09   |
| 100125_at   | 284.6   | 346.9   | 691.7   | 561     | 453.3   | 451.9   | 564.4   | 594.2   | 0.681416485 | 471.05    | 515.95   | 44.9     | 0.912976064 | 0.5287    | 1.157  |
| 100126_at   | 1159    | 1364.4  | 974.3   | 953.5   | 1171.6  | 1106.2  | 995     | 1048    | 0.767758399 | 1112.8    | 1080.2   | 32.6     | 1.030179596 | 0.8258    | 1.021  |
| 100127_at   | 78.5    | 92.6    | 84.9    | 86.1    | 171.3   | 187.5   | 248.9   | 180.7   | 0.007022682 | 85.525    | 197.1    | 111.575  | 0.433916794 | 0.0000953 | 2.283  |
| 100128_at   | 3500.1  | 2880.3  | 2859.4  | 2705.8  | 2696.7  | 2549.8  | 2860.2  | 2711.8  | 0.209978269 | 2986.4    | 2704.625 | 281.775  | 1.10418265  | 0.1701    | -1.1   |
| 100130_at   | 123.5   | 156.6   | 288     | 270.4   | 184.6   | 125     | 242.4   | 200.5   | 0.670685991 | 209.625   | 188.125  | 21.5     | 1.114285714 | 0.7776    | -1.077 |
| 100131_at   | 58.7    | 52.9    | 44.4    | 50.1    | 54.1    | 105.5   | 46.4    | 76.1    | 0.248313124 | 51.525    | 70.525   | 19       | 0.730591989 | 0.2132    | 1.307  |
| 100133_at   | 1030.8  | 1119    | 1516.8  | 1619.4  | 1512.7  | 962.7   | 1538.6  | 1605.2  | 0.702246099 | 1321.5    | 1404.8   | 83.3     | 0.940703303 | 0.7281    | 1.061  |
| 100134_at   | 1127.5  | 1671.9  | 1340.2  | 1533.9  | 1323.1  | 876     | 1199.8  | 1181.1  | 0.124227906 | 1418.375  | 1145     | 273.375  | 1.238755459 | 0.1336    | -1.239 |
| 100136_at   | 463.8   | 524.8   | 626.7   | 522.8   | 679     | 654.7   | 480.7   | 555     | 0.352749626 | 534.525   | 592.35   | 57.825   | 0.902380349 | 0.3637    | 1.104  |
| 100138_f_at | 247.5   | 316.3   | 688.4   | 599.5   | 366.5   | 377.3   | 557.3   | 326.9   | 0.66027644  | 462.925   | 407      | 55.925   | 1.137407862 | 0.8272    | -1.064 |
| 100139_at   | 23      | 36.1    | 47.5    | 17.7    | 13.9    | 40      | 15.5    | 23.3    | 0.413155008 | 31.075    | 23.175   | 7.9      | 1.340884574 | 0.3742    | -1.367 |
| 100141_at   | 84.4    | 62      | 47.9    | 41.9    | 39.5    | 93.2    | 68.8    | 59.6    | 0.685133908 | 59.05     | 65.275   | 6.225    | 0.90463424  | 0.7131    | 1.095  |
| 100142_at   | 724.2   | 710.8   | 992.3   | 1099.5  | 695.2   | 531.6   | 925.7   | 991.9   | 0.531382641 | 881.7     | 786.1    | 95.6     | 1.121613026 | 0.512     | -1.134 |
| 100143_at   | 23.5    | 14.1    | 10.1    | 22.9    | 13      | 15.2    | 22.3    | 21.4    | 0.938565592 | 17.65     | 17.975   | 0.325    | 0.981919332 | 0.8391    | 1.053  |



|             |         |         |        |         |         |         |         |        |             |          |          |         |             |          |        |
|-------------|---------|---------|--------|---------|---------|---------|---------|--------|-------------|----------|----------|---------|-------------|----------|--------|
| 100144_at   | 8833.6  | 8792.3  | 7662.6 | 6932.1  | 8430.4  | 8048.1  | 6856.4  | 7466.7 | 0.562581299 | 8055.15  | 7700.4   | 354.75  | 1.046069035 | 0.582    | -1.044 |
| 100147_at   | 30.5    | 65.7    | 95.8   | 69.4    | 73.4    | 72.5    | 91.1    | 73.7   | 0.436816521 | 65.35    | 77.675   | 12.325  | 0.841326038 | 0.36     | 1.28   |
| 100148_at   | 634.8   | 637.4   | 801.3  | 919.9   | 676.8   | 552.2   | 847.4   | 818.5  | 0.808431028 | 748.35   | 723.725  | 24.625  | 1.034025355 | 0.803    | -1.036 |
| 100149_at   | 43.9    | 21.3    | 7.3    | 17.6    | 22      | 18.5    | 7       | 5.5    | 0.341574293 | 22.525   | 13.25    | 9.275   | 1.7         | 0.3506   | -1.667 |
| 100150_f_at | 45.2    | 35.9    | 28.1   | 24.3    | 45.3    | 43.1    | 44.5    | 59.3   | 0.050823583 | 33.375   | 48.05    | 14.675  | 0.69458897  | 0.04753  | 1.469  |
| 100151_at   | 6593.6  | 8824.1  | 7480.5 | 6449.5  | 7879.8  | 7401.6  | 6941.6  | 6908.6 | 0.931601653 | 7336.925 | 7282.9   | 54.025  | 1.007418061 | 0.9911   | 1.001  |
| 100152_at   | 35.1    | 37.6    | 5.5    | 7.9     | 13.1    | 7.9     | 30.1    | 8.1    | 0.533683438 | 21.525   | 14.8     | 6.725   | 1.454391892 | 0.7343   | -1.232 |
| 100153_at   | 634.9   | 680.1   | 675.2  | 887.5   | 799.3   | 798.4   | 1117.6  | 1024.1 | 0.077246056 | 719.425  | 934.85   | 215.425 | 0.769561962 | 0.06303  | 1.296  |
| 100154_at   | 758.6   | 865.3   | 815.6  | 960.5   | 753.8   | 633.8   | 639.5   | 888.2  | 0.155976352 | 850      | 728.825  | 121.175 | 1.166260762 | 0.1405   | -1.173 |
| 100155_at   | 680.2   | 822.9   | 865.2  | 1040.6  | 922.8   | 669     | 756.3   | 778.1  | 0.469955555 | 852.225  | 781.55   | 70.675  | 1.090429275 | 0.4839   | -1.085 |
| 100156_at   | 3079.9  | 2158    | 2274.7 | 1982.3  | 2002    | 2924.6  | 2288.6  | 2220.3 | 0.963823022 | 2373.725 | 2358.875 | 14.85   | 1.006295374 | 0.9888   | 1.002  |
| 100213_f_at | 27894.8 | 29233.4 | 16570  | 19589.8 | 20295.3 | 21648.6 | 22342.5 | 22083  | 0.617995114 | 23322    | 21592.35 | 1729.65 | 1.080104759 | 0.7321   | -1.051 |
| 100225_f_at | 501.9   | 549.1   | 476.6  | 626.7   | 792.6   | 561.8   | 653.9   | 513.5  | 0.249270235 | 538.575  | 630.45   | 91.875  | 0.854270759 | 0.2323   | 1.161  |
| 100272_at   | 73.8    | 28.4    | 31.8   | 49.3    | 17.3    | 46.8    | 87.3    | 79     | 0.563749493 | 45.825   | 57.6     | 11.775  | 0.795572917 | 0.7693   | 1.141  |
| 100277_at   | 2609.1  | 2006.5  | 1930.5 | 1836.3  | 1618.4  | 1871.1  | 2685.7  | 2368.5 | 0.896944462 | 2095.6   | 2135.925 | 40.325  | 0.981120592 | 0.9487   | 1.009  |
| 100278_at   | 28.9    | 9.6     | 23.9   | 64.5    | 8.9     | 18.2    | 20.2    | 50.4   | 0.63900496  | 31.725   | 24.425   | 7.3     | 1.298874104 | 0.6676   | -1.269 |
| 100279_at   | 51      | 82.7    | 271.6  | 214.3   | 19.7    | 30.1    | 47.1    | 67.8   | 0.117286166 | 154.9    | 41.175   | 113.725 | 3.7619915   | 0.04344  | -3.376 |
| 100280_at   | 53.6    | 26.5    | 31.6   | 38.1    | 22.6    | 72.1    | 31.2    | 16.1   | 0.894778243 | 37.45    | 35.5     | 1.95    | 1.054929577 | 0.6208   | -1.203 |
| 100281_at   | 7.9     | 27.5    | 15.6   | 19.8    | 38.6    | 48.9    | 18.8    | 22.4   | 0.137954774 | 17.7     | 32.175   | 14.475  | 0.55011655  | 0.1256   | 1.851  |
| 100282_at   | 227.6   | 129     | 192    | 159.5   | 115.1   | 208.8   | 157.6   | 167.5  | 0.624413184 | 177.025  | 162.25   | 14.775  | 1.091063174 | 0.6325   | -1.091 |
| 100283_at   | 27.8    | 12.5    | 16.1   | 19.1    | 9.5     | 14.1    | 12.5    | 17.4   | 0.200299017 | 18.875   | 13.375   | 5.5     | 1.411214953 | 0.1739   | -1.385 |
| 100284_at   | 9.6     | 7.3     | 11.3   | 8.3     | 4.9     | 15      | 6.2     | 3.6    | 0.568912736 | 9.125    | 7.425    | 1.7     | 1.228956229 | 0.3218   | -1.414 |
| 100285_at   | 8.5     | 6       | 5.3    | 4.7     | 4.5     | 12.7    | 4.1     | 4.8    | 0.866211671 | 6.125    | 6.525    | 0.4     | 0.938697318 | 0.9116   | -1.035 |
| 100286_at   | 45      | 11.7    | 11     | 10.9    | 12.5    | 17.2    | 10.8    | 40.5   | 0.957963244 | 19.65    | 20.25    | 0.6     | 0.97037037  | 0.8397   | 1.101  |
| 100287_at   | 86.4    | 26.3    | 25.6   | 37.1    | 10.9    | 70.7    | 13.4    | 18.5   | 0.473510223 | 43.85    | 28.375   | 15.475  | 1.545374449 | 0.278    | -1.832 |
| 100289_at   | 866.9   | 724     | 565.4  | 600     | 685     | 848.9   | 736.5   | 778.8  | 0.388360347 | 689.075  | 762.3    | 73.225  | 0.903942018 | 0.3344   | 1.119  |
| 100290_f_at | 155.2   | 132.5   | 185.1  | 203.4   | 152.3   | 164.5   | 188.7   | 169.5  | 0.987045849 | 169.05   | 168.75   | 0.3     | 1.001777778 | 0.9364   | 1.009  |
| 100291_at   | 153.9   | 66      | 24.4   | 122.4   | 72.7    | 57      | 67.3    | 76.6   | 0.481166805 | 91.675   | 68.4     | 23.275  | 1.340277778 | 0.8388   | -1.092 |
| 100292_at   | 24.7    | 43.5    | 43.2   | 50.2    | 49.7    | 39.7    | 51.2    | 41     | 0.460845975 | 40.4     | 45.4     | 5       | 0.889867841 | 0.4292   | 1.154  |
| 100293_at   | 225.8   | 209.3   | 192.2  | 247.6   | 205.6   | 216.9   | 198.4   | 188    | 0.275439615 | 218.725  | 202.225  | 16.5    | 1.081592286 | 0.2671   | -1.078 |
| 100294_at   | 100.4   | 43.4    | 51.5   | 54.5    | 22.8    | 76.2    | 65.4    | 62.9   | 0.757442712 | 62.45    | 56.825   | 5.625   | 1.098988121 | 0.699    | -1.144 |
| 100295_at   | 184.3   | 144     | 149.5  | 190.4   | 122.5   | 268.4   | 139.5   | 202.7  | 0.670771993 | 167.05   | 183.275  | 16.225  | 0.911471832 | 0.7964   | 1.053  |
| 100296_at   | 178.4   | 112.8   | 169.6  | 136.4   | 92.4    | 91.8    | 135.4   | 82.6   | 0.046654293 | 149.3    | 100.55   | 48.75   | 1.484833416 | 0.03924  | -1.488 |
| 100297_at   | 230.5   | 208.7   | 264.6  | 433.2   | 342.8   | 354     | 396     | 453.9  | 0.139638325 | 284.25   | 386.675  | 102.425 | 0.735113467 | 0.09565  | 1.41   |
| 100298_at   | 150.5   | 194.7   | 176.3  | 258.8   | 242.2   | 82      | 45.3    | 189.7  | 0.336872953 | 195.075  | 139.8    | 55.275  | 1.395386266 | 0.2482   | -1.673 |
| 100299_f_at | 38.5    | 17.5    | 22.4   | 5.4     | 31.9    | 33      | 20.8    | 6.3    | 0.832027545 | 20.95    | 23       | 2.05    | 0.910869565 | 0.8187   | 1.145  |
| 100300_at   | 53.9    | 54.8    | 76.5   | 71.5    | 47.2    | 63.3    | 80.3    | 34.5   | 0.525672585 | 64.175   | 56.325   | 7.85    | 1.139369729 | 0.4444   | -1.182 |
| 100301_at   | 16.2    | 14.5    | 19.1   | 13      | 13.7    | 17.7    | 11.4    | 8.7    | 0.27304336  | 15.7     | 12.875   | 2.825   | 1.219417476 | 0.2476   | -1.244 |
| 100302_at   | 83.6    | 25.2    | 48.2   | 36.2    | 21.9    | 92.7    | 64.5    | 23.3   | 0.917949866 | 48.3     | 50.6     | 2.3     | 0.954545455 | 0.9199   | -1.047 |
| 100303_at   | 35.8    | 15.5    | 13.3   | 14.2    | 29.2    | 27.8    | 42.1    | 20.9   | 0.191700925 | 19.7     | 30       | 10.3    | 0.656666667 | 0.1288   | 1.616  |
| 100304_at   | 207.6   | 222.3   | 180.9  | 248.7   | 203.7   | 267.7   | 189.7   | 214.5  | 0.862024189 | 214.875  | 218.9    | 4.025   | 0.981612608 | 0.8722   | 1.017  |
| 100305_g_at | 509.5   | 176.4   | 287.3  | 178.8   | 148     | 184.4   | 114.3   | 93.5   | 0.143839872 | 288      | 135.05   | 152.95  | 2.132543502 | 0.05545  | -1.994 |
| 100306_at   | 142.6   | 143.6   | 202.6  | 161.6   | 164.5   | 154.9   | 207.9   | 194.2  | 0.37987833  | 162.6    | 180.375  | 17.775  | 0.901455301 | 0.3568   | 1.113  |
| 100307_at   | 49.7    | 136.8   | 154.4  | 160.3   | 73.2    | 202.5   | 154.2   | 126.9  | 0.721953951 | 125.3    | 139.2    | 13.9    | 0.900143678 | 0.7122   | 1.146  |
| 100308_at   | 98.4    | 100.7   | 98.7   | 92.8    | 124.4   | 112.7   | 122.4   | 103.9  | 0.024858087 | 97.65    | 115.85   | 18.2    | 0.842900302 | 0.009582 | 1.184  |
| 100309_at   | 7.5     | 11      | 6.9    | 6.9     | 8.7     | 7.2     | 20.4    | 6.5    | 0.489659666 | 8.075    | 10.7     | 2.625   | 0.754672897 | 0.5371   | 1.204  |
| 100311_f_at | 7.5     | 7.2     | 13.4   | 6.3     | 5.5     | 28.7    | 5.2     | 4.1    | 0.733703839 | 8.6      | 10.875   | 2.275   | 0.790804598 | 0.8744   | -1.082 |
| 100313_at   | 25.4    | 18.8    | 28.2   | 30.5    | 4.8     | 46.9    | 56.7    | 38.8   | 0.402727915 | 25.725   | 36.8     | 11.075  | 0.699048913 | 0.9368   | 1.049  |
| 100314_f_at | 20.9    | 7.2     | 8.5    | 9.1     | 8.4     | 10.8    | 5.4     | 8.9    | 0.42055417  | 11.425   | 8.375    | 3.05    | 1.364179104 | 0.4178   | -1.274 |
| 100315_at   | 116.5   | 77.5    | 50.5   | 24.7    | 35.8    | 59.2    | 117.9   | 133.4  | 0.550662515 | 67.3     | 86.575   | 19.275  | 0.77736067  | 0.5705   | 1.312  |
| 100317_at   | 46.9    | 25.2    | 33.5   | 45.4    | 48.3    | 52.4    | 35.8    | 48.2   | 0.233544781 | 37.75    | 46.175   | 8.425   | 0.81754196  | 0.233    | 1.25   |
| 100318_at   | 194.9   | 156.4   | 112.1  | 144.6   | 150.4   | 220.1   | 174     | 114.4  | 0.666281851 | 152      | 164.725  | 12.725  | 0.922750038 | 0.7002   | 1.075  |
| 100319_at   | 7.8     | 7       | 3.8    | 3       | 19      | 11.4    | 28.5    | 4      | 0.142072411 | 5.4      | 15.725   | 10.325  | 0.343402226 | 0.1079   | 2.506  |
| 100320_at   | 77.8    | 47      | 90.4   | 41.8    | 34.2    | 85.8    | 49.1    | 50.3   | 0.580500401 | 64.25    | 54.85    | 9.4     | 1.171376481 | 0.5701   | -1.174 |
| 100321_f_at | 67.9    | 35.9    | 32.6   | 26.9    | 54.3    | 81.7    | 57.6    | 48     | 0.15063144  | 40.825   | 60.4     | 19.575  | 0.675910596 | 0.1073   | 1.548  |
| 100322_at   | 64.8    | 35.2    | 34.6   | 10.3    | 39.2    | 51.7    | 56.7    | 53.9   | 0.301476701 | 36.225   | 50.375   | 14.15   | 0.7191067   | 0.2458   | 1.662  |



|             |         |         |         |        |         |         |         |         |             |           |           |         |             |          |        |
|-------------|---------|---------|---------|--------|---------|---------|---------|---------|-------------|-----------|-----------|---------|-------------|----------|--------|
| 100323_at   | 2307.1  | 2225.6  | 2742.4  | 2570.5 | 2134.2  | 2675.6  | 3014.4  | 2711.7  | 0.464273465 | 2461.4    | 2633.975  | 172.575 | 0.934481155 | 0.4936   | 1.066  |
| 100324_g_at | 377.3   | 354.2   | 540.3   | 612.5  | 426.7   | 534.4   | 902.2   | 749.3   | 0.2030281   | 471.075   | 653.15    | 182.075 | 0.721235551 | 0.1962   | 1.366  |
| 100325_at   | 40.5    | 26.4    | 37.7    | 45.9   | 47.7    | 61.6    | 90      | 33.7    | 0.185629914 | 37.625    | 58.25     | 20.625  | 0.645922747 | 0.1507   | 1.482  |
| 100326_f_at | 45.6    | 22.6    | 26.7    | 34.7   | 35.6    | 47.3    | 19.9    | 20.5    | 0.856286556 | 32.4      | 30.825    | 1.575   | 1.051094891 | 0.7616   | -1.087 |
| 100327_at   | 118     | 119.1   | 120.3   | 162.3  | 102     | 196.7   | 138.8   | 123.3   | 0.67520389  | 129.925   | 140.2     | 10.275  | 0.92671184  | 0.7351   | 1.058  |
| 100328_s_at | 99.1    | 173.8   | 150.3   | 132.4  | 140.9   | 176.7   | 126.3   | 111.9   | 0.998179097 | 138.9     | 138.95    | 0.05    | 0.999640158 | 0.9671   | 1.007  |
| 100329_at   | 16.5    | 5.8     | 6.9     | 6.8    | 21.4    | 16.7    | 6.5     | 11.3    | 0.272802102 | 9         | 13.975    | 4.975   | 0.644007156 | 0.2578   | 1.554  |
| 100330_at   | 4.6     | 1.2     | 0.7     | 1.9    | 1.4     | 2.2     | 2.6     | 1.2     | 0.801776312 | 2.1       | 1.85      | 0.25    | 1.135135135 | 0.903    | 1.057  |
| 100331_g_at | 10254.7 | 11317.3 | 8135.1  | 8128.6 | 10221.5 | 9496.3  | 9300.7  | 8985.1  | 0.962691702 | 9458.925  | 9500.9    | 41.975  | 0.995581997 | 0.8801   | 1.014  |
| 100332_s_at | 1259.6  | 1096.3  | 1128.1  | 927.6  | 1009.9  | 1114.8  | 1024.7  | 961.9   | 0.372576875 | 1102.9    | 1027.825  | 75.075  | 1.07304259  | 0.3836   | -1.068 |
| 100333_at   | 117.1   | 60.7    | 59.1    | 59     | 66.1    | 118.8   | 80.3    | 96.5    | 0.405112784 | 73.975    | 90.425    | 16.45   | 0.818081283 | 0.3264   | 1.252  |
| 100334_f_at | 12.6    | 15      | 17.3    | 11.7   | 8.5     | 11      | 11.1    | 13.7    | 0.112655653 | 14.15     | 11.075    | 3.075   | 1.27765237  | 0.1079   | -1.282 |
| 100335_at   | 45.6    | 72.9    | 29.1    | 69.2   | 22.7    | 118.1   | 84.1    | 21.7    | 0.788024792 | 54.2      | 61.65     | 7.45    | 0.879156529 | 0.8767   | -1.082 |
| 100336_s_at | 153.3   | 137.4   | 63.3    | 131.7  | 92.5    | 148.2   | 120.5   | 157     | 0.754193305 | 121.425   | 129.55    | 8.125   | 0.937282902 | 0.6919   | 1.103  |
| 100337_at   | 14.1    | 12      | 7.1     | 10.7   | 6.2     | 15.3    | 8       | 7.2     | 0.508284321 | 10.975    | 9.175     | 1.8     | 1.196185286 | 0.4155   | -1.24  |
| 100338_s_at | 7.5     | 23.9    | 9.2     | 22.3   | 11.4    | 43.7    | 14.3    | 71.5    | 0.265150827 | 15.725    | 35.225    | 19.5    | 0.446415898 | 0.2628   | 1.927  |
| 100339_at   | 51.3    | 16.4    | 20.9    | 53.3   | 46.8    | 46.7    | 46.6    | 36.2    | 0.450331607 | 35.475    | 44.075    | 8.6     | 0.804878049 | 0.3119   | 1.409  |
| 100340_at   | 19      | 1.3     | 1       | 2.8    | 8       | 3.1     | 0.7     | 0.4     | 0.560280012 | 6.025     | 3.05      | 2.975   | 1.975409836 | 0.5632   | -1.805 |
| 100341_g_at | 6.8     | 9.9     | 4       | 7.5    | 26.3    | 16.9    | 5.6     | 16.3    | 0.114258248 | 7.05      | 16.275    | 9.225   | 0.433179724 | 0.09628  | 2.113  |
| 100342_i_at | 11595.3 | 13784.2 | 8436.2  | 9123.2 | 10675.1 | 9647    | 11791.8 | 11381.2 | 0.920690483 | 10734.725 | 10873.775 | 139.05  | 0.987212353 | 0.8175   | 1.03   |
| 100343_f_at | 15487.6 | 13373.6 | 10331.8 | 9955.6 | 10862.6 | 10904.4 | 12519.5 | 11397.3 | 0.565544204 | 12287.15  | 11420.95  | 866.2   | 1.075843078 | 0.6196   | -1.06  |
| 100344_at   | 822     | 819     | 709.3   | 742.8  | 753.9   | 937.3   | 738.9   | 774.1   | 0.628440564 | 773.275   | 801.05    | 27.775  | 0.965326759 | 0.6377   | 1.033  |
| 100345_f_at | 3132.1  | 3252.9  | 2150.2  | 1998.8 | 3213.6  | 3006    | 2353.5  | 2620.9  | 0.681040446 | 2633.5    | 2798.5    | 165     | 0.941039843 | 0.6114   | 1.08   |
| 100346_at   | 20.3    | 12.4    | 23.7    | 36.8   | 33.8    | 43.3    | 27.3    | 31.3    | 0.140223953 | 23.3      | 33.925    | 10.625  | 0.686809138 | 0.1253   | 1.546  |
| 100347_at   | 21.2    | 13.2    | 14.8    | 13.8   | 12.5    | 20.5    | 10.7    | 21      | 0.90060065  | 15.75     | 16.175    | 0.425   | 0.973724884 | 0.9936   | 1.002  |
| 100348_at   | 17.1    | 33.8    | 30.7    | 55.5   | 38.3    | 66.4    | 36      | 86.8    | 0.178048882 | 34.275    | 56.875    | 22.6    | 0.602637363 | 0.1565   | 1.685  |
| 100349_at   | 14.2    | 23.3    | 9       | 20.9   | 7.8     | 20.6    | 36      | 19.7    | 0.558170877 | 16.85     | 21.025    | 4.175   | 0.801426873 | 0.7072   | 1.163  |
| 100350_at   | 13.7    | 5.3     | 13.8    | 4.2    | 3.4     | 9.9     | 8.8     | 6.5     | 0.514241875 | 9.25      | 7.15      | 2.1     | 1.293706294 | 0.6401   | -1.215 |
| 100351_f_at | 15      | 28.3    | 11.3    | 6.6    | 6       | 18.6    | 15.1    | 7.3     | 0.550831607 | 15.3      | 11.75     | 3.55    | 1.30212766  | 0.583    | -1.268 |
| 100352_at   | 107.3   | 129     | 90.6    | 142.7  | 95.3    | 133.9   | 72      | 108.3   | 0.419218441 | 117.4     | 102.375   | 15.025  | 1.146764347 | 0.4062   | -1.158 |
| 100353_g_at | 872.4   | 699.5   | 716.5   | 1033.9 | 697.3   | 960.4   | 861     | 860.9   | 0.88597991  | 830.575   | 844.9     | 14.325  | 0.983045331 | 0.8438   | 1.024  |
| 100354_at   | 2.7     | 1.6     | 1.1     | 4.7    | 0.9     | 2       | 1.3     | 1.6     | 0.274686322 | 2.525     | 1.45      | 1.075   | 1.74137931  | 0.2656   | -1.548 |
| 100355_g_at | 10.3    | 6.8     | 9.3     | 11.6   | 3.3     | 25.8    | 6       | 11      | 0.717063098 | 9.5       | 11.525    | 2.025   | 0.824295011 | 0.872    | -1.08  |
| 100356_at   | 10      | 12.6    | 8.3     | 12.4   | 9.2     | 61.2    | 5       | 6.3     | 0.532258584 | 10.825    | 20.425    | 9.6     | 0.52998776  | 0.9004   | 1.079  |
| 100357_g_at | 152.8   | 135.4   | 172.9   | 144.7  | 120.2   | 205     | 124.1   | 160.6   | 0.963924936 | 151.45    | 152.475   | 1.025   | 0.993277586 | 0.9248   | 1.013  |
| 100358_s_at | 179.8   | 149.3   | 97.8    | 170.9  | 75.8    | 190.6   | 125.3   | 119.1   | 0.496955122 | 149.45    | 127.7     | 21.75   | 1.170321065 | 0.4627   | -1.201 |
| 100359_at   | 30.9    | 10.7    | 12      | 43.2   | 12.2    | 40.8    | 15      | 55.2    | 0.631085747 | 24.2      | 30.8      | 6.6     | 0.785714286 | 0.6791   | 1.246  |
| 100360_f_at | 272.8   | 194.7   | 225.5   | 247.4  | 181.6   | 267.5   | 266.1   | 217.3   | 0.943276079 | 235.1     | 233.125   | 1.975   | 1.00847185  | 0.9115   | -1.014 |
| 100361_f_at | 56.4    | 45.4    | 49.8    | 54.8   | 32.1    | 93.2    | 45.8    | 59.4    | 0.680211766 | 51.6      | 57.625    | 6.025   | 0.895444685 | 0.8728   | 1.039  |
| 100362_f_at | 23.8    | 20.8    | 65.7    | 25.2   | 20.6    | 28.8    | 47.4    | 28.4    | 0.840253735 | 33.875    | 31.3      | 2.575   | 1.082268371 | 0.9844   | 1.006  |
| 100363_at   | 11.4    | 7.2     | 4.5     | 13.7   | 2.2     | 9       | 8.1     | 21.6    | 0.832597661 | 9.2       | 10.225    | 1.025   | 0.899755501 | 0.8583   | -1.105 |
| 100364_at   | 20.2    | 50.6    | 27.8    | 9.5    | 22.1    | 14.7    | 20.5    | 54.4    | 0.944943545 | 27.025    | 27.925    | 0.9     | 0.967770815 | 0.8742   | 1.077  |
| 100365_at   | 25.4    | 40      | 4.9     | 29.7   | 6       | 33.6    | 24.2    | 33.7    | 0.951429151 | 25        | 24.375    | 0.625   | 1.025641026 | 0.966    | 1.028  |
| 100366_at   | 211.4   | 229.9   | 249.5   | 254.9  | 185.7   | 318.7   | 279.3   | 264.4   | 0.439140591 | 236.425   | 262.025   | 25.6    | 0.902299399 | 0.5084   | 1.09   |
| 100367_g_at | 240.6   | 217     | 203.2   | 222.6  | 176.4   | 249.9   | 186.5   | 217.4   | 0.505640963 | 220.85    | 207.55    | 13.3    | 1.064080944 | 0.4487   | -1.072 |
| 100368_at   | 101.8   | 71.4    | 134.5   | 104.9  | 48.4    | 95.6    | 141.8   | 93      | 0.727901596 | 103.15    | 94.7      | 8.45    | 1.089229145 | 0.6326   | -1.139 |
| 100369_at   | 23.8    | 37.6    | 152.9   | 68.1   | 13.2    | 47.5    | 49.2    | 95.8    | 0.593172084 | 70.6      | 51.425    | 19.175  | 1.372873116 | 0.6376   | -1.331 |
| 100370_at   | 63      | 10.9    | 54.8    | 63.6   | 27.7    | 50.7    | 36.6    | 63.4    | 0.823704026 | 48.075    | 44.6      | 3.475   | 1.077914798 | 0.8759   | 1.079  |
| 100371_at   | 374.9   | 297     | 317     | 322.7  | 276.7   | 308.3   | 427.5   | 261.3   | 0.829280071 | 327.9     | 318.45    | 9.45    | 1.029674988 | 0.7234   | -1.046 |
| 100372_at   | 15.9    | 7.4     | 4.8     | 26.8   | 19.6    | 41.4    | 14.8    | 6.1     | 0.485970626 | 13.725    | 20.475    | 6.75    | 0.67032967  | 0.5026   | 1.48   |
| 100373_at   | 63.1    | 26.5    | 45.2    | 45.3   | 40.4    | 57      | 48.7    | 45.4    | 0.746066997 | 45.025    | 47.875    | 2.85    | 0.940469974 | 0.6259   | 1.104  |
| 100374_at   | 757.1   | 704.5   | 870.6   | 1006.3 | 31.6    | 40.2    | 34.7    | 135.3   | 0.000521545 | 834.625   | 60.45     | 774.175 | 13.80686518 | 0.000192 | -16.74 |
| 100375_i_at | 26.9    | 9.7     | 2.1     | 5.2    | 3.7     | 6       | 3.2     | 7.7     | 0.372376979 | 10.975    | 5.15      | 5.825   | 2.131067961 | 0.4983   | -1.51  |
| 100376_f_at | 33.4    | 15.3    | 15.9    | 26     | 13.8    | 8.9     | 9.1     | 12.1    | 0.07022863  | 22.65     | 10.975    | 11.675  | 2.063781321 | 0.01999  | -1.987 |
| 100377_f_at | 45.1    | 31.5    | 8       | 7.2    | 9.1     | 29.2    | 31.3    | 28.5    | 0.888391101 | 22.95     | 24.525    | 1.575   | 0.935779817 | 0.6485   | 1.306  |
| 100378_at   | 14.4    | 7.8     | 20.2    | 33.8   | 31.7    | 23.8    | 28.7    | 26.4    | 0.21973665  | 19.05     | 27.65     | 8.6     | 0.688969259 | 0.1592   | 1.653  |



|             |        |        |        |        |        |        |        |        |             |          |          |         |             |          |        |
|-------------|--------|--------|--------|--------|--------|--------|--------|--------|-------------|----------|----------|---------|-------------|----------|--------|
| 100379_f_at | 3884.3 | 5351.7 | 2318   | 4263.4 | 4436.7 | 3108.9 | 3701.9 | 4753.2 | 0.952360818 | 3954.35  | 4000.175 | 45.825  | 0.988544251 | 0.8426   | 1.043  |
| 100380_at   | 5144.3 | 5764.4 | 5595.8 | 5533.5 | 5898   | 5162.8 | 5738   | 5527.8 | 0.738538861 | 5509.5   | 5581.65  | 72.15   | 0.987073715 | 0.7484   | 1.013  |
| 100381_at   | 41.6   | 76.6   | 123    | 132.7  | 53     | 117.9  | 88.3   | 80.6   | 0.747182463 | 93.475   | 84.95    | 8.525   | 1.100353149 | 0.9044   | -1.04  |
| 100382_at   | 10     | 6.9    | 3      | 6.6    | 2.9    | 5.3    | 4.2    | 6.2    | 0.278751532 | 6.625    | 4.65     | 1.975   | 1.424731183 | 0.3523   | -1.361 |
| 100383_at   | 17.6   | 17.5   | 31.9   | 30.2   | 6.5    | 18.1   | 28.4   | 71     | 0.673565089 | 24.3     | 31       | 6.7     | 0.783870968 | 0.9175   | -1.058 |
| 100384_at   | 21.8   | 16.4   | 9.7    | 10.4   | 14.8   | 27.5   | 8.8    | 8.4    | 0.956879275 | 14.575   | 14.875   | 0.3     | 0.979831933 | 0.892    | -1.049 |
| 100385_at   | 189.2  | 172.7  | 144.6  | 186.3  | 132.1  | 240.5  | 132.5  | 145    | 0.723646483 | 173.2    | 162.525  | 10.675  | 1.065682203 | 0.5793   | -1.096 |
| 100386_at   | 83.1   | 75.4   | 66.1   | 75.2   | 29.2   | 79.3   | 88.9   | 89.2   | 0.835935427 | 74.95    | 71.65    | 3.3     | 1.046057223 | 0.6464   | -1.142 |
| 100387_f_at | 1      | 1.3    | 3.1    | 2.2    | 1.9    | 1.6    | 1.1    | 2.4    | 0.795343674 | 1.9      | 1.75     | 0.15    | 1.085714286 | 0.9486   | 1.02   |
| 100388_at   | 17.4   | 7.2    | 13.2   | 12.7   | 14.5   | 21.9   | 27     | 11.3   | 0.203949307 | 12.625   | 18.675   | 6.05    | 0.676037483 | 0.2061   | 1.467  |
| 100389_at   | 156.1  | 43.7   | 138.4  | 40     | 80.1   | 228.9  | 66.2   | 47     | 0.839251144 | 94.55    | 105.55   | 11      | 0.895783989 | 0.8425   | 1.109  |
| 100390_s_at | 125.8  | 105.1  | 78.3   | 68.6   | 77.2   | 98.6   | 109.1  | 72.4   | 0.755850819 | 94.45    | 89.325   | 5.125   | 1.057374755 | 0.8151   | -1.042 |
| 100391_at   | 27.8   | 59.5   | 69.3   | 58.6   | 42.1   | 39.5   | 62.8   | 57.5   | 0.767500436 | 53.8     | 50.475   | 3.325   | 1.065874195 | 0.9081   | -1.029 |
| 100392_at   | 325.2  | 246.6  | 282.3  | 273    | 221.9  | 353.1  | 241.6  | 239.5  | 0.627314925 | 281.775  | 264.025  | 17.75   | 1.067228482 | 0.5393   | -1.081 |
| 100393_at   | 8.8    | 22.9   | 9.6    | 45.6   | 26.6   | 21.1   | 6.3    | 25.6   | 0.859936902 | 21.725   | 19.9     | 1.825   | 1.091708543 | 0.9946   | 1.004  |
| 100394_at   | 14.4   | 12.4   | 12.4   | 11.8   | 11.4   | 17.4   | 8.3    | 11     | 0.737869051 | 12.75    | 12.025   | 0.725   | 1.06029106  | 0.5791   | -1.097 |
| 100395_at   | 134.5  | 109    | 173.7  | 288    | 90.7   | 128.8  | 152.3  | 153.2  | 0.348328077 | 176.3    | 131.25   | 45.05   | 1.343238095 | 0.3471   | -1.281 |
| 100396_i_at | 24.6   | 24.4   | 30     | 81.9   | 50.5   | 26.4   | 37.2   | 38.2   | 0.891969718 | 40.225   | 38.075   | 2.15    | 1.056467498 | 0.8491   | 1.065  |
| 100397_at   | 412.3  | 688    | 299.2  | 251.2  | 630.1  | 460    | 352.9  | 280    | 0.889048721 | 412.675  | 430.75   | 18.075  | 0.958038305 | 0.8024   | 1.077  |
| 100398_at   | 151.6  | 176.3  | 186.6  | 166.4  | 220.3  | 166.3  | 180.5  | 176.2  | 0.315876376 | 170.225  | 185.825  | 15.6    | 0.916050047 | 0.304    | 1.089  |
| 100400_at   | 230.6  | 287.5  | 280.8  | 300.8  | 336.5  | 281.9  | 379.7  | 388.2  | 0.05463724  | 274.925  | 346.575  | 71.65   | 0.793262642 | 0.05074  | 1.257  |
| 100401_at   | 523    | 418.3  | 315.1  | 410.5  | 347.5  | 482.4  | 415.8  | 400.3  | 0.92190257  | 416.725  | 411.5    | 5.225   | 1.012697448 | 0.9781   | 1.004  |
| 100402_f_at | 14.7   | 10.7   | 4.3    | 2.9    | 28.2   | 16     | 6.6    | 8.4    | 0.293847767 | 8.15     | 14.8     | 6.65    | 0.550675676 | 0.2485   | 1.902  |
| 100403_at   | 37.8   | 79.6   | 58     | 57.8   | 30.4   | 30.5   | 21.6   | 14.5   | 0.020469636 | 58.3     | 24.25    | 34.05   | 2.404123711 | 0.008965 | -2.425 |
| 100404_at   | 1327.2 | 1386.8 | 1159.9 | 1305.6 | 1215.5 | 1678.8 | 1425.2 | 1024.6 | 0.796562272 | 1294.875 | 1336.025 | 41.15   | 0.969199678 | 0.887    | 1.017  |
| 100405_at   | 500.4  | 446    | 311.3  | 436.3  | 250.7  | 365.2  | 975.6  | 558.8  | 0.53200443  | 423.5    | 537.575  | 114.075 | 0.787797052 | 0.7008   | 1.133  |
| 100406_at   | 57     | 36.1   | 54.2   | 50.8   | 45.8   | 25.8   | 39.4   | 32.9   | 0.076379918 | 49.525   | 35.975   | 13.55   | 1.376650452 | 0.08931  | -1.386 |
| 100407_at   | 344.6  | 276    | 205.1  | 257.3  | 279.8  | 367.9  | 196.9  | 204.7  | 0.870146535 | 270.75   | 262.325  | 8.425   | 1.032116649 | 0.8014   | -1.049 |
| 100408_at   | 353.5  | 424.2  | 295.8  | 333.5  | 309.8  | 318    | 327.9  | 284.6  | 0.223008075 | 351.75   | 310.075  | 41.675  | 1.134402967 | 0.1926   | -1.126 |
| 100409_at   | 915.3  | 792.2  | 770.3  | 986.2  | 490.8  | 543.7  | 474.9  | 466.7  | 0.003170377 | 866      | 494.025  | 371.975 | 1.752947725 | 0.000177 | -1.747 |
| 100410_at   | 606    | 732.9  | 589.3  | 459.9  | 710.1  | 627.5  | 549.5  | 473.8  | 0.931178722 | 597.025  | 590.225  | 6.8     | 1.01152103  | 0.9451   | 1.009  |
| 100411_at   | 1.2    | 1.5    | 2.2    | 1.1    | 1.2    | 2.2    | 10.3   | 1.7    | 0.356999055 | 1.5      | 3.85     | 2.35    | 0.38961039  | 0.2782   | 1.812  |
| 100412_g_at | 314.6  | 502.4  | 514.4  | 515.3  | 304.6  | 337.9  | 560.6  | 548.7  | 0.787220729 | 461.675  | 437.95   | 23.725  | 1.054172851 | 0.7384   | -1.073 |
| 100413_at   | 479.7  | 342.5  | 518.1  | 742.8  | 436.1  | 389.2  | 641.9  | 661.6  | 0.919659448 | 520.775  | 532.2    | 11.425  | 0.978532507 | 0.88     | 1.033  |
| 100414_s_at | 12.6   | 43.8   | 24.2   | 11.9   | 29.8   | 10     | 30.5   | 50.9   | 0.545329411 | 23.125   | 30.3     | 7.175   | 0.76320132  | 0.5827   | 1.306  |
| 100415_at   | 58.1   | 44.4   | 30.6   | 42.8   | 54.5   | 54.2   | 32.5   | 29     | 0.877765637 | 43.975   | 42.55    | 1.425   | 1.033490012 | 0.8249   | -1.05  |
| 100416_at   | 46.5   | 55.5   | 55.9   | 53.1   | 50.4   | 44.5   | 59.8   | 63.9   | 0.717118747 | 52.75    | 54.65    | 1.9     | 0.965233303 | 0.7779   | 1.028  |
| 100417_at   | 97.1   | 81.1   | 73.9   | 122.9  | 64.8   | 78.1   | 99.7   | 61.9   | 0.252888381 | 93.75    | 76.125   | 17.625  | 1.231527094 | 0.2321   | -1.23  |
| 100418_at   | 66.9   | 97.3   | 85.4   | 65.4   | 85.5   | 74.3   | 85.6   | 79.5   | 0.777279375 | 78.75    | 81.225   | 2.475   | 0.969529086 | 0.6898   | 1.044  |
| 100420_at   | 49.3   | 19.3   | 24.6   | 27.4   | 51.7   | 40.7   | 18.5   | 24.6   | 0.723590917 | 30.15    | 33.875   | 3.725   | 0.8900369   | 0.757    | 1.104  |
| 100421_at   | 394.4  | 182.4  | 365.7  | 314.9  | 237.6  | 567.4  | 327.1  | 389.9  | 0.465181516 | 314.35   | 380.5    | 66.15   | 0.826149803 | 0.4953   | 1.2    |
| 100422_i_at | 410.7  | 415    | 467.8  | 445.1  | 464.7  | 597.2  | 470.3  | 516.6  | 0.079434407 | 434.65   | 512.2    | 77.55   | 0.848594299 | 0.0501   | 1.174  |
| 100423_f_at | 272.8  | 265    | 249.6  | 249.8  | 279.4  | 346.9  | 256.4  | 233.3  | 0.485852504 | 259.3    | 279      | 19.7    | 0.929390681 | 0.4995   | 1.065  |
| 100424_at   | 335.7  | 255.4  | 274.4  | 232.7  | 352.3  | 353.6  | 183.7  | 315    | 0.588593915 | 274.55   | 301.15   | 26.6    | 0.911671924 | 0.7069   | 1.071  |
| 100425_at   | 428    | 268    | 357.5  | 436.5  | 421.9  | 567.5  | 434.5  | 526.9  | 0.072089822 | 372.5    | 487.7    | 115.2   | 0.763789215 | 0.08228  | 1.323  |
| 100426_s_at | 8.2    | 9.4    | 8.7    | 7.8    | 4.3    | 8.4    | 7.2    | 4.7    | 0.090557546 | 8.525    | 6.15     | 2.375   | 1.386178862 | 0.06882  | -1.444 |
| 100427_at   | 118.6  | 109.7  | 152.9  | 146.8  | 106.3  | 134.8  | 178.4  | 141.4  | 0.668737597 | 132      | 140.225  | 8.225   | 0.941344268 | 0.7026   | 1.055  |
| 100428_at   | 160.3  | 176.8  | 209.5  | 180.3  | 196    | 257.3  | 199.6  | 230.9  | 0.073330335 | 181.725  | 220.95   | 39.225  | 0.822471147 | 0.06251  | 1.214  |
| 100429_at   | 413.7  | 334.3  | 274    | 282.2  | 264    | 256.2  | 262.3  | 338.3  | 0.277115829 | 326.05   | 280.2    | 45.85   | 1.163633119 | 0.2561   | -1.155 |
| 100430_at   | 31.1   | 18.3   | 16.7   | 35.6   | 18.5   | 25.6   | 15.5   | 40.3   | 0.952533426 | 25.425   | 24.975   | 0.45    | 1.018018018 | 0.9111   | -1.033 |
| 100431_at   | 182.5  | 162.6  | 152.2  | 220.8  | 248.1  | 148.5  | 131.1  | 197.4  | 0.956366996 | 179.525  | 181.275  | 1.75    | 0.990346159 | 0.9466   | 1.012  |
| 100432_f_at | 774    | 906.6  | 478    | 903.5  | 995.4  | 456.8  | 588.8  | 1121   | 0.899518556 | 765.525  | 790.5    | 24.975  | 0.968406072 | 0.993    | 1.002  |
| 100433_r_at | 470.7  | 487.8  | 286.8  | 497.7  | 452.6  | 306.5  | 254.9  | 603.9  | 0.750343079 | 435.75   | 404.475  | 31.275  | 1.077322455 | 0.6638   | -1.113 |
| 100434_s_at | 249.7  | 254    | 109.2  | 226.3  | 239    | 19.2   | 121    | 359.2  | 0.77051506  | 209.8    | 184.6    | 25.2    | 1.136511376 | 0.4762   | -1.674 |
| 100435_at   | 994.3  | 883    | 993.9  | 775.1  | 942    | 1012.1 | 957.4  | 837.3  | 0.704155474 | 911.575  | 937.2    | 25.625  | 0.972657917 | 0.6843   | 1.031  |
| 100436_at   | 10.5   | 2.8    | 1.4    | 10.3   | 8.5    | 14.5   | 2.3    | 14.5   | 0.367317615 | 6.25     | 9.95     | 3.7     | 0.628140704 | 0.4185   | 1.781  |



|             |        |        |        |        |        |        |        |        |             |          |          |         |             |          |        |
|-------------|--------|--------|--------|--------|--------|--------|--------|--------|-------------|----------|----------|---------|-------------|----------|--------|
| 100437_g_at | 18.3   | 16.3   | 13.2   | 20.6   | 16.8   | 27.8   | 14.9   | 15.1   | 0.674761948 | 17.1     | 18.65    | 1.55    | 0.91689008  | 0.7209   | 1.068  |
| 100438_at   | 168.8  | 134.7  | 122.6  | 161.2  | 138.7  | 177.9  | 150.8  | 132.4  | 0.840142749 | 146.825  | 149.95   | 3.125   | 0.97915972  | 0.8253   | 1.023  |
| 100439_i_at | 267.2  | 162.9  | 132.5  | 198.3  | 188.6  | 253.1  | 112.8  | 175.5  | 0.856149278 | 190.225  | 182.5    | 7.725   | 1.042328767 | 0.8386   | -1.049 |
| 100440_f_at | 460.3  | 351.5  | 311.9  | 414.5  | 348.2  | 561    | 343.6  | 451.5  | 0.525993328 | 384.55   | 426.075  | 41.525  | 0.902540633 | 0.5477   | 1.097  |
| 100441_s_at | 24.6   | 8.3    | 14.3   | 43.5   | 31.1   | 31.6   | 9.4    | 28.1   | 0.808943484 | 22.675   | 25.05    | 2.375   | 0.905189621 | 0.7102   | 1.196  |
| 100442_at   | 274.4  | 215.2  | 272.1  | 297.7  | 267.8  | 287.4  | 263.2  | 307.2  | 0.451866825 | 264.85   | 281.4    | 16.55   | 0.941186923 | 0.4339   | 1.068  |
| 100443_at   | 1093.7 | 798    | 795.1  | 643.8  | 444.4  | 524.7  | 351.6  | 411    | 0.017790945 | 832.65   | 432.925  | 399.725 | 1.923312352 | 0.003307 | -1.908 |
| 100444_at   | 1681.2 | 1688.4 | 1183.5 | 1560.4 | 1160.3 | 1150.8 | 1120.9 | 1043.6 | 0.037697803 | 1528.375 | 1118.9   | 409.475 | 1.365962106 | 0.01332  | -1.353 |
| 100445_f_at | 2.6    | 1.6    | 1.5    | 2      | 3.8    | 5      | 1.1    | 1.8    | 0.352160473 | 1.925    | 2.925    | 1       | 0.658119658 | 0.4678   | 1.328  |
| 100446_r_at | 6751.2 | 7851.9 | 4752.4 | 4528.2 | 6505.5 | 7480.1 | 4124.5 | 5052.5 | 0.874712149 | 5970.925 | 5790.65  | 180.275 | 1.031132084 | 0.8809   | -1.03  |
| 100447_at   | 866.8  | 823.3  | 804.3  | 650.2  | 680    | 789.2  | 821.3  | 794.7  | 0.802998403 | 786.15   | 771.3    | 14.85   | 1.019253209 | 0.8417   | 1.016  |
| 100448_at   | 404.6  | 320.5  | 369.4  | 381.2  | 212    | 324.4  | 303.5  | 267.9  | 0.025901439 | 368.925  | 276.95   | 91.975  | 1.332099657 | 0.03144  | -1.344 |
| 100449_g_at | 324.7  | 269.4  | 395.9  | 389.4  | 277.2  | 284    | 336.1  | 251    | 0.1586203   | 344.85   | 287.075  | 57.775  | 1.201254028 | 0.1548   | -1.194 |
| 100450_r_at | 635    | 556.8  | 583.7  | 534.1  | 343.6  | 467.4  | 431.6  | 405.5  | 0.00305405  | 577.4    | 412.025  | 165.375 | 1.401371276 | 0.003895 | -1.407 |
| 100451_at   | 260.5  | 272.1  | 275.5  | 311.8  | 214.2  | 278.2  | 239.8  | 317.7  | 0.522509996 | 279.975  | 262.475  | 17.5    | 1.066673016 | 0.4666   | -1.076 |
| 100452_at   | 174.4  | 108.8  | 123.3  | 123.4  | 72.4   | 107.1  | 158.2  | 104.9  | 0.377482665 | 132.475  | 110.65   | 21.825  | 1.197243561 | 0.3259   | -1.224 |
| 100453_at   | 132.2  | 36.8   | 86.6   | 90.6   | 45     | 22.3   | 85.1   | 89.6   | 0.345488969 | 86.55    | 60.5     | 26.05   | 1.430578512 | 0.3793   | -1.494 |
| 100454_at   | 331.8  | 214.7  | 215.9  | 269.8  | 285.1  | 305.7  | 284    | 245.7  | 0.5067893   | 258.05   | 280.125  | 22.075  | 0.921195895 | 0.4329   | 1.1    |
| 100455_at   | 34.3   | 38.7   | 58.2   | 80.1   | 83.2   | 62.2   | 46.5   | 66.2   | 0.402778703 | 52.825   | 64.525   | 11.7    | 0.818674932 | 0.34     | 1.267  |
| 100457_at   | 1041   | 1167.1 | 1176.4 | 1264.8 | 1131.3 | 1000.4 | 1159.1 | 1238.6 | 0.673143103 | 1162.325 | 1132.35  | 29.975  | 1.026471497 | 0.6723   | 1.027  |
| 100458_at   | 72.2   | 46     | 50.4   | 68.8   | 80.6   | 89.7   | 59.9   | 65.3   | 0.176271386 | 59.35    | 73.875   | 14.525  | 0.803384095 | 0.1738   | 1.252  |
| 100459_at   | 848.9  | 853.1  | 775.7  | 887.8  | 944.2  | 1100.2 | 766.1  | 942.5  | 0.256080632 | 841.375  | 938.25   | 96.875  | 0.896749267 | 0.2471   | 1.107  |
| 100460_at   | 506.4  | 523.4  | 721    | 795    | 645.5  | 572.6  | 685.8  | 696.6  | 0.868160924 | 636.45   | 650.125  | 13.675  | 0.978965584 | 0.7678   | 1.038  |
| 100461_at   | 1512.3 | 2219.8 | 1663.4 | 1500.3 | 2349.6 | 1860.8 | 1603.4 | 1523.3 | 0.676704695 | 1723.95  | 1834.275 | 110.325 | 0.939853621 | 0.6658   | 1.063  |
| 100462_at   | 74.2   | 79.8   | 68.7   | 87.9   | 58.2   | 70.2   | 53.5   | 83.6   | 0.212509545 | 77.65    | 66.375   | 11.275  | 1.169868173 | 0.1867   | -1.183 |
| 100463_at   | 9.1    | 8      | 4      | 3.9    | 4.9    | 10.8   | 5.8    | 5.5    | 0.802866183 | 6.25     | 6.75     | 0.5     | 0.925925926 | 0.747    | 1.102  |
| 100464_at   | 892.9  | 681.9  | 750.9  | 824.5  | 878.3  | 702.4  | 863.5  | 805.8  | 0.6950913   | 787.55   | 812.5    | 24.95   | 0.969292308 | 0.6891   | 1.033  |
| 100465_i_at | 1452.8 | 1324.3 | 1113.7 | 773.3  | 1375.5 | 1425.6 | 875.3  | 869.2  | 0.893958314 | 1166.025 | 1136.4   | 29.625  | 1.026069166 | 0.8973   | -1.027 |
| 100466_f_at | 3317.6 | 2916.9 | 1959.1 | 1874.3 | 2911.5 | 3413.1 | 2083.3 | 1657.1 | 0.998959621 | 2516.975 | 2516.25  | 0.725   | 1.000288127 | 0.9688   | 1.009  |
| 100467_at   | 90.9   | 57.5   | 36     | 59.6   | 37.8   | 35.5   | 43.3   | 68     | 0.321128083 | 61       | 46.15    | 14.85   | 1.321776815 | 0.3179   | -1.298 |
| 100468_g_at | 103.1  | 143.8  | 96.9   | 123.8  | 92.6   | 88.6   | 84.5   | 141.6  | 0.413216513 | 116.9    | 101.825  | 15.075  | 1.148048122 | 0.3579   | -1.16  |
| 100469_at   | 454.9  | 354.9  | 560.6  | 569.5  | 384.9  | 418.5  | 371.2  | 481.1  | 0.269790558 | 484.975  | 413.925  | 71.05   | 1.171649453 | 0.2871   | -1.157 |
| 100470_at   | 175.1  | 181.2  | 156.4  | 204.9  | 272.5  | 182.9  | 219.3  | 209.7  | 0.112698821 | 179.4    | 221.1    | 41.7    | 0.811397558 | 0.08739  | 1.225  |
| 100471_at   | 1033   | 847.9  | 888.5  | 763    | 977    | 1025.7 | 852.6  | 792    | 0.725756689 | 883.1    | 911.825  | 28.725  | 0.968497245 | 0.7195   | 1.033  |
| 100472_at   | 494.1  | 511.7  | 848.5  | 903.3  | 450.4  | 439.2  | 609.7  | 601.8  | 0.235099206 | 689.4    | 525.275  | 164.125 | 1.312455381 | 0.2304   | -1.278 |
| 100473_at   | 226    | 220    | 250.5  | 251.9  | 193.4  | 197.2  | 226    | 225.2  | 0.069016592 | 237.1    | 210.45   | 26.65   | 1.126633405 | 0.06979  | -1.127 |
| 100474_at   | 395.1  | 373.7  | 613.8  | 487.3  | 444.2  | 306.2  | 537    | 532.5  | 0.876090507 | 467.475  | 454.975  | 12.5    | 1.027474037 | 0.8608   | -1.032 |
| 100475_at   | 330.4  | 298.9  | 605.2  | 607.5  | 485.1  | 368.7  | 563.5  | 656.7  | 0.599795803 | 460.5    | 518.5    | 58      | 0.888138862 | 0.5331   | 1.162  |
| 100476_at   | 4.4    | 1.9    | 10.9   | 10.3   | 9.1    | 13.4   | 16.2   | 4      | 0.315730956 | 6.875    | 10.675   | 3.8     | 0.644028103 | 0.3425   | 1.706  |
| 100477_at   | 694.9  | 887.9  | 909.8  | 786.2  | 860.8  | 813.9  | 1008.1 | 871    | 0.330740911 | 819.7    | 888.45   | 68.75   | 0.922618043 | 0.3225   | 1.087  |
| 100479_at   | 120.1  | 157.4  | 163.1  | 205.5  | 201.8  | 162.5  | 129.9  | 211.5  | 0.582719928 | 161.525  | 176.425  | 14.9    | 0.915544849 | 0.5944   | 1.092  |
| 100481_at   | 102.7  | 59.1   | 88.8   | 149.4  | 90.3   | 106.3  | 155.1  | 98.4   | 0.618561957 | 100      | 112.525  | 12.525  | 0.888691402 | 0.5321   | 1.161  |
| 100482_at   | 399.1  | 464.5  | 747    | 813.6  | 643.8  | 782.6  | 708.4  | 642.9  | 0.462156701 | 606.05   | 694.425  | 88.375  | 0.872736437 | 0.3644   | 1.195  |
| 100483_at   | 478.2  | 620.1  | 445.2  | 479.7  | 611.2  | 416.8  | 464.5  | 463.9  | 0.781003695 | 505.8    | 489.1    | 16.7    | 1.034144347 | 0.7555   | -1.036 |
| 100484_at   | 27.3   | 25.1   | 22.6   | 20     | 11.1   | 41.9   | 11.5   | 31.3   | 0.98098411  | 23.75    | 23.95    | 0.2     | 0.991649269 | 0.673    | -1.167 |
| 100486_at   | 299    | 354    | 382.1  | 470.5  | 489.4  | 399.4  | 438.3  | 505.4  | 0.114328248 | 376.4    | 458.125  | 81.725  | 0.821609823 | 0.1065   | 1.228  |
| 100488_at   | 874.3  | 804.2  | 715.8  | 696.7  | 774.5  | 998.3  | 812.9  | 724.9  | 0.480952977 | 772.75   | 827.65   | 54.9    | 0.933667613 | 0.4796   | 1.068  |
| 100489_at   | 164.7  | 172.9  | 186.8  | 275.9  | 166.9  | 139    | 228.3  | 237.5  | 0.845121709 | 200.075  | 192.925  | 7.15    | 1.037061034 | 0.8318   | -1.039 |
| 100491_at   | 396.7  | 418.6  | 449.4  | 447.9  | 477.2  | 334.8  | 471.7  | 496.5  | 0.69059182  | 428.15   | 445.05   | 16.9    | 0.962026739 | 0.7794   | 1.029  |
| 100492_at   | 1048.4 | 1131.2 | 1044.6 | 916.6  | 1019.5 | 1105.9 | 865.5  | 957.4  | 0.50198043  | 1035.2   | 987.075  | 48.125  | 1.04875516  | 0.4978   | -1.05  |
| 100493_at   | 177.9  | 135.7  | 246.4  | 161.1  | 159.4  | 142.9  | 174.4  | 159.8  | 0.44476336  | 180.275  | 159.125  | 21.15   | 1.132914375 | 0.4663   | -1.108 |
| 100494_at   | 57.4   | 48.3   | 71.4   | 52     | 55.3   | 69.9   | 67     | 102.9  | 0.215048557 | 57.275   | 73.775   | 16.5    | 0.776347001 | 0.1761   | 1.269  |
| 100495_at   | 321.2  | 334.6  | 459.5  | 530.8  | 280.2  | 278.3  | 402.8  | 440.4  | 0.388510011 | 411.525  | 350.425  | 61.1    | 1.174359706 | 0.3868   | -1.173 |
| 100496_at   | 146.5  | 89.7   | 247.3  | 106.5  | 261.1  | 234.6  | 154.8  | 103.4  | 0.449225667 | 147.5    | 188.475  | 40.975  | 0.782597161 | 0.4293   | 1.297  |
| 100497_at   | 10.1   | 22.3   | 4.5    | 2.9    | 13.4   | 30.9   | 14.7   | 6.7    | 0.375886944 | 9.95     | 16.425   | 6.475   | 0.605783866 | 0.2755   | 1.932  |
| 100498_g_at | 48.3   | 50.9   | 40.3   | 65.1   | 41.7   | 108.6  | 69.3   | 49.5   | 0.369850217 | 51.15    | 67.275   | 16.125  | 0.760312152 | 0.3824   | 1.246  |



|             |        |         |        |        |         |        |         |         |             |          |          |         |             |          |        |
|-------------|--------|---------|--------|--------|---------|--------|---------|---------|-------------|----------|----------|---------|-------------|----------|--------|
| 100499_at   | 57.9   | 47.2    | 67.4   | 70.3   | 63.2    | 85.8   | 65.6    | 78.9    | 0.142289153 | 60.7     | 73.375   | 12.675  | 0.82725724  | 0.1472   | 1.213  |
| 100500_at   | 352.5  | 291.7   | 338.4  | 359.3  | 287.9   | 293.3  | 302.7   | 295.2   | 0.072876439 | 335.475  | 294.775  | 40.7    | 1.13807141  | 0.04011  | -1.135 |
| 100501_at   | 10     | 8.6     | 6.6    | 6.2    | 6.7     | 11     | 7.8     | 8.9     | 0.578441738 | 7.85     | 8.6      | 0.75    | 0.912790698 | 0.5802   | 1.094  |
| 100502_at   | 3.4    | 3.8     | 2.1    | 12.9   | 7.1     | 15.9   | 10.2    | 10.7    | 0.132600246 | 5.55     | 10.975   | 5.425   | 0.505694761 | 0.07865  | 2.438  |
| 100505_at   | 20.5   | 9.2     | 13.3   | 21.7   | 10.4    | 11.1   | 3.6     | 11.5    | 0.101280954 | 16.175   | 9.15     | 7.025   | 1.767759563 | 0.1272   | -1.832 |
| 100507_at   | 16.1   | 80.5    | 28.6   | 71.1   | 34.4    | 21.1   | 77.6    | 44.6    | 0.823017507 | 49.075   | 44.425   | 4.65    | 1.104670793 | 0.9793   | 1.013  |
| 100508_at   | 224.1  | 155.8   | 194.2  | 146.2  | 174.3   | 239.6  | 128.6   | 168.9   | 0.941804059 | 180.075  | 177.85   | 2.225   | 1.012510543 | 0.896    | 1.022  |
| 100509_at   | 1276.9 | 1228    | 1384.4 | 1289.9 | 1490.5  | 1294.8 | 1355.4  | 1413.3  | 0.130404727 | 1294.8   | 1388.5   | 93.7    | 0.932517105 | 0.1255   | 1.072  |
| 100510_at   | 242.4  | 111.9   | 133.9  | 139.7  | 145.3   | 226.4  | 165.3   | 200.5   | 0.459921341 | 156.975  | 184.375  | 27.4    | 0.851389831 | 0.362    | 1.211  |
| 100511_at   | 142.1  | 132.4   | 122.3  | 148.4  | 115.9   | 150.6  | 146.3   | 181     | 0.44820046  | 136.3    | 148.45   | 12.15   | 0.918154261 | 0.4827   | 1.078  |
| 100512_at   | 307    | 379.7   | 627.8  | 445    | 482.5   | 320.9  | 415.9   | 477.6   | 0.850059587 | 439.875  | 424.225  | 15.65   | 1.036890801 | 0.9384   | -1.014 |
| 100513_at   | 560.8  | 450     | 582.5  | 643.2  | 539.9   | 637.6  | 518.3   | 672.2   | 0.571408294 | 559.125  | 592      | 32.875  | 0.944467905 | 0.5675   | 1.061  |
| 100514_at   | 761.9  | 775.4   | 1087.5 | 1207.1 | 863.3   | 776.8  | 1073.9  | 1108.4  | 0.986879568 | 957.975  | 955.6    | 2.375   | 1.00248535  | 0.9618   | 1.007  |
| 100515_at   | 634.9  | 695.3   | 881.7  | 880.7  | 867.4   | 734.1  | 766.5   | 920.4   | 0.551233403 | 773.15   | 822.1    | 48.95   | 0.940457365 | 0.5194   | 1.07   |
| 100516_at   | 390    | 395.2   | 428.6  | 553.2  | 514.3   | 470.8  | 565.9   | 558.8   | 0.111583045 | 441.75   | 527.45   | 85.7    | 0.837520144 | 0.09021  | 1.203  |
| 100518_at   | 115    | 62.7    | 67.5   | 67.6   | 66.3    | 119.5  | 66.7    | 65.9    | 0.940973218 | 78.2     | 79.6     | 1.4     | 0.98241206  | 0.946    | 1.014  |
| 100521_at   | 114.7  | 83.2    | 94.7   | 142.5  | 133.4   | 152    | 101.1   | 135.2   | 0.246402595 | 108.775  | 130.425  | 21.65   | 0.834004217 | 0.2363   | 1.211  |
| 100522_s_at | 8264.3 | 10027.8 | 7536.3 | 9086.4 | 9325.5  | 8292.8 | 11000.4 | 10195.2 | 0.264250422 | 8728.7   | 9703.475 | 974.775 | 0.89954372  | 0.2657   | 1.112  |
| 100523_r_at | 1186.7 | 1478.5  | 1112.7 | 1303.2 | 1964.4  | 1144.5 | 1413.9  | 1390.9  | 0.333123106 | 1270.275 | 1478.425 | 208.15  | 0.859208279 | 0.3215   | 1.148  |
| 100525_at   | 744.7  | 594.2   | 555.5  | 588    | 535.8   | 716.4  | 564.5   | 582.2   | 0.732150146 | 620.6    | 599.725  | 20.875  | 1.03480762  | 0.7205   | -1.035 |
| 100526_f_at | 8.5    | 22.8    | 4      | 2      | 15.6    | 49.5   | 5.1     | 5.1     | 0.454329699 | 9.325    | 18.825   | 9.5     | 0.495351926 | 0.432    | 1.884  |
| 100527_at   | 1375.5 | 1411.6  | 1197.7 | 1153.7 | 1100.4  | 1207   | 1155.8  | 1191.9  | 0.15468616  | 1284.625 | 1163.775 | 120.85  | 1.103843097 | 0.1267   | -1.1   |
| 100528_at   | 376    | 442     | 561.1  | 729    | 534.2   | 509    | 592.3   | 681.6   | 0.575307619 | 527.025  | 579.275  | 52.25   | 0.909801044 | 0.4778   | 1.127  |
| 100529_at   | 438.8  | 293.4   | 410.4  | 438.5  | 368.7   | 451.5  | 479.3   | 274.4   | 0.97618512  | 395.275  | 393.475  | 1.8     | 1.004574624 | 0.9319   | -1.014 |
| 100530_at   | 936.9  | 863.7   | 918.5  | 908.9  | 767.8   | 972.3  | 808.2   | 936.9   | 0.532053849 | 907      | 871.3    | 35.7    | 1.040973258 | 0.4821   | -1.046 |
| 100533_s_at | 123.8  | 117.7   | 93.1   | 117    | 190.7   | 120.7  | 137.6   | 129.8   | 0.135356003 | 112.9    | 144.7    | 31.8    | 0.780234969 | 0.0935   | 1.268  |
| 100534_at   | 1556.6 | 1523.3  | 1539.1 | 1338.7 | 1466.5  | 1561.9 | 1447.3  | 1455.2  | 0.911896399 | 1489.425 | 1482.725 | 6.7     | 1.004518707 | 0.938    | 1.003  |
| 100535_at   | 417.4  | 522.6   | 598.7  | 531.6  | 526.4   | 410    | 517.4   | 524.4   | 0.64229819  | 517.575  | 494.55   | 23.025  | 1.046557476 | 0.6756   | -1.043 |
| 100536_at   | 3.3    | 3.1     | 2.7    | 2.6    | 2.5     | 3.2    | 2.4     | 2.4     | 0.283498742 | 2.925    | 2.625    | 0.3     | 1.114285714 | 0.2501   | -1.119 |
| 100537_at   | 56.5   | 6.3     | 4.8    | 13     | 16.2    | 22.3   | 8.3     | 4.3     | 0.600715197 | 20.15    | 12.775   | 7.375   | 1.577299413 | 0.8418   | -1.148 |
| 100538_at   | 3257.4 | 4009.5  | 3173   | 3063.1 | 4497    | 4118.3 | 3050.7  | 3233.1  | 0.431798338 | 3375.75  | 3724.775 | 349.025 | 0.906296353 | 0.4451   | 1.095  |
| 100539_at   | 707.2  | 647.8   | 681.8  | 556.7  | 564     | 583.3  | 591.3   | 698.2   | 0.414388061 | 648.375  | 609.2    | 39.175  | 1.064305647 | 0.418    | -1.064 |
| 100540_at   | 2944.6 | 2399.9  | 2323.8 | 2296.6 | 2545.1  | 3163.5 | 2757.7  | 2731.9  | 0.17658886  | 2491.225 | 2799.55  | 308.325 | 0.889866229 | 0.159    | 1.126  |
| 100542_at   | 22.9   | 29.8    | 15.6   | 15.6   | 31.2    | 43.9   | 10      | 11.2    | 0.744695173 | 20.975   | 24.075   | 3.1     | 0.871235722 | 0.9602   | -1.021 |
| 100543_s_at | 1107.7 | 1107.3  | 1219.1 | 1202.8 | 1226    | 1093.4 | 1193    | 1173.8  | 0.774971931 | 1159.225 | 1171.55  | 12.325  | 0.989479749 | 0.7742   | 1.011  |
| 100544_at   | 170.1  | 161.8   | 166.4  | 160.5  | 197.4   | 169.6  | 203     | 194.2   | 0.032497607 | 164.7    | 191.05   | 26.35   | 0.86207799  | 0.01346  | 1.157  |
| 100546_at   | 51.1   | 61.3    | 60.5   | 81.1   | 69.3    | 84.8   | 75.3    | 73.5    | 0.152396045 | 63.5     | 75.725   | 12.225  | 0.838560581 | 0.1236   | 1.206  |
| 100547_at   | 792.5  | 811     | 695.6  | 661.6  | 660.2   | 925.3  | 637.2   | 808.2   | 0.828797578 | 740.175  | 757.725  | 17.55   | 0.976838563 | 0.8833   | 1.016  |
| 100548_at   | 1443   | 1002.2  | 1264.4 | 1006.8 | 1288.5  | 1408.9 | 1239.2  | 1128.4  | 0.509282511 | 1179.1   | 1266.25  | 87.15   | 0.931174729 | 0.456    | 1.084  |
| 100549_at   | 93     | 78.3    | 95.3   | 63.7   | 93.8    | 117.5  | 106.4   | 100     | 0.054714883 | 82.575   | 104.425  | 21.85   | 0.790758918 | 0.05866  | 1.276  |
| 100550_f_at | 8728.6 | 11239.2 | 8058.7 | 9434.9 | 10606.4 | 9634.8 | 9186.3  | 9709.2  | 0.604146688 | 9365.35  | 9784.175 | 418.825 | 0.957193632 | 0.54     | 1.051  |
| 100551_r_at | 18.2   | 18.3    | 7.1    | 8.3    | 14.6    | 12.1   | 15.3    | 12.7    | 0.836864513 | 12.975   | 13.675   | 0.7     | 0.9488117   | 0.6087   | 1.149  |
| 100552_at   | 266.4  | 301.4   | 297.6  | 370    | 286.8   | 292.6  | 315.1   | 242.8   | 0.395725361 | 308.85   | 284.325  | 24.525  | 1.086256924 | 0.3975   | -1.083 |
| 100553_at   | 1064.6 | 1152.9  | 1480   | 1313.7 | 1214.3  | 1561.7 | 1218.3  | 1161.6  | 0.789694631 | 1252.8   | 1288.975 | 36.175  | 0.971935065 | 0.7766   | 1.03   |
| 100554_at   | 528.3  | 621.9   | 534.8  | 545.9  | 349.1   | 424.8  | 408.4   | 429.4   | 0.001752602 | 557.725  | 402.925  | 154.8   | 1.384190606 | 0.001729 | -1.386 |
| 100555_at   | 1916.3 | 1642    | 2049.1 | 1857.7 | 1866    | 1895.3 | 1998.4  | 1981.9  | 0.490225719 | 1866.275 | 1935.4   | 69.125  | 0.964283869 | 0.458    | 1.04   |
| 100556_at   | 42.4   | 24      | 17.1   | 16.3   | 15      | 26.9   | 12.8    | 17.5    | 0.362963497 | 24.95    | 18.05    | 6.9     | 1.382271468 | 0.3317   | -1.333 |
| 100557_g_at | 2588.6 | 2087.7  | 2249.5 | 2186.5 | 1597    | 2331.7 | 2487.4  | 2343.7  | 0.716668292 | 2278.075 | 2189.95  | 88.125  | 1.040240645 | 0.6659   | -1.052 |
| 100558_at   | 9.7    | 14      | 19.2   | 30.5   | 25.2    | 12.2   | 9       | 27.5    | 0.98514741  | 18.35    | 18.475   | 0.125   | 0.9932341   | 0.9748   | 1.012  |
| 100559_at   | 252.7  | 264.2   | 229.6  | 311.5  | 240.3   | 253.5  | 257.4   | 240.1   | 0.410715173 | 264.5    | 247.825  | 16.675  | 1.067285383 | 0.4035   | -1.061 |
| 100560_at   | 773.6  | 674.2   | 943.6  | 919.1  | 916.8   | 769.1  | 1087.9  | 999.5   | 0.259241577 | 827.625  | 943.325  | 115.7   | 0.87734874  | 0.2685   | 1.141  |
| 100561_at   | 748.7  | 948.5   | 912.8  | 954.6  | 681.9   | 767.8  | 1254.9  | 935.1   | 0.896628299 | 891.15   | 909.925  | 18.775  | 0.979366431 | 0.9906   | 1.002  |
| 100562_at   | 678.7  | 691.3   | 524.9  | 534.6  | 505.1   | 613.6  | 550.2   | 584     | 0.427121231 | 607.375  | 563.225  | 44.15   | 1.078387856 | 0.4447   | -1.072 |
| 100564_at   | 700    | 936.1   | 752.8  | 654.3  | 973.1   | 795.6  | 722.3   | 826.5   | 0.431492903 | 760.8    | 829.375  | 68.575  | 0.917317257 | 0.4015   | 1.094  |
| 100565_at   | 474    | 387.8   | 577.9  | 494.5  | 525.6   | 456.6  | 602.7   | 506.5   | 0.458643081 | 483.55   | 522.85   | 39.3    | 0.924835039 | 0.4384   | 1.087  |
| 100566_at   | 3173.7 | 3747.5  | 3525.6 | 4425   | 2146.3  | 2552.9 | 3107.2  | 4267.1  | 0.247030149 | 3717.95  | 3018.375 | 699.575 | 1.231772063 | 0.2003   | -1.264 |



|             |         |         |        |        |         |        |         |        |             |          |          |         |             |         |        |
|-------------|---------|---------|--------|--------|---------|--------|---------|--------|-------------|----------|----------|---------|-------------|---------|--------|
| 100567_at   | 73.1    | 57.5    | 35.7   | 52.3   | 27      | 44.2   | 60.8    | 30.4   | 0.244485888 | 54.65    | 40.6     | 14.05   | 1.346059113 | 0.2304  | -1.373 |
| 100568_at   | 1408.1  | 1351.7  | 1440.5 | 1210.6 | 1381.2  | 1511.1 | 1298.2  | 1384.7 | 0.563647678 | 1352.725 | 1393.8   | 41.075  | 0.970530205 | 0.5597  | 1.031  |
| 100569_at   | 12712.4 | 11940.2 | 7663.1 | 6733.4 | 10246.1 | 9641.5 | 10149.9 | 8662.4 | 0.958116548 | 9762.275 | 9674.975 | 87.3    | 1.009023279 | 0.8792  | 1.026  |
| 100570_at   | 559.3   | 672     | 641.9  | 591.5  | 644.9   | 606.7  | 640.2   | 518.3  | 0.736459946 | 616.175  | 602.525  | 13.65   | 1.022654662 | 0.7294  | 1.024  |
| 100571_at   | 2296.4  | 1816.8  | 2472.1 | 1642.7 | 2261.8  | 1804.5 | 1965.8  | 1701.9 | 0.61506419  | 2057     | 1933.5   | 123.5   | 1.063873804 | 0.6538  | -1.055 |
| 100572_at   | 594.8   | 599.8   | 890.1  | 873.8  | 667.4   | 586.3  | 722.6   | 794.2  | 0.637497363 | 739.625  | 692.625  | 47      | 1.067857787 | 0.6973  | -1.054 |
| 100573_f_at | 195.4   | 369.4   | 437.8  | 330.2  | 656.5   | 430    | 338.2   | 450.3  | 0.162725167 | 333.2    | 468.75   | 135.55  | 0.710826667 | 0.1612  | 1.425  |
| 100574_f_at | 8663.3  | 8687.9  | 7741.8 | 7586   | 9015.3  | 7427.5 | 7430.1  | 7821   | 0.624997012 | 8169.75  | 7923.475 | 246.275 | 1.031081691 | 0.6037  | -1.032 |
| 100575_at   | 745.5   | 771.1   | 490.3  | 421.9  | 710.6   | 588.8  | 452.3   | 495.7  | 0.684374168 | 607.2    | 561.85   | 45.35   | 1.080715493 | 0.7537  | -1.061 |
| 100576_at   | 2392.9  | 2349    | 1676.7 | 1557.6 | 1993.3  | 2254.9 | 1619.7  | 1625.5 | 0.670010792 | 1994.05  | 1873.35  | 120.7   | 1.064430032 | 0.7097  | -1.055 |
| 100577_at   | 287.5   | 355.8   | 309    | 347.9  | 347.8   | 309.4  | 373     | 378.9  | 0.273819938 | 325.05   | 352.275  | 27.225  | 0.922716628 | 0.2798  | 1.084  |
| 100578_at   | 2920.1  | 2371.4  | 2452.6 | 2854.7 | 2088.6  | 2186.4 | 2288.3  | 2966.9 | 0.317900733 | 2649.7   | 2382.55  | 267.15  | 1.112127762 | 0.2819  | -1.118 |
| 100579_s_at | 1756.9  | 2097.8  | 1883.4 | 1901.8 | 2036.7  | 1984   | 1665    | 1928.4 | 0.954563591 | 1909.975 | 1903.525 | 6.45    | 1.00338845  | 0.9423  | 1.004  |
| 100580_at   | 27.7    | 23.5    | 18.9   | 22.6   | 45.2    | 28.2   | 23.1    | 23.3   | 0.292011688 | 23.175   | 29.95    | 6.775   | 0.773789649 | 0.2455  | 1.253  |
| 100581_at   | 4167    | 4793.2  | 4009.7 | 3285.1 | 5268.8  | 4284.4 | 3698.4  | 4404.8 | 0.464267724 | 4063.75  | 4414.1   | 350.35  | 0.920629347 | 0.4619  | 1.087  |
| 100582_at   | 509.4   | 490.6   | 613.8  | 387.5  | 502.9   | 477.9  | 438.6   | 441.3  | 0.515136796 | 500.325  | 465.175  | 35.15   | 1.07556296  | 0.5629  | -1.063 |
| 100583_at   | 135.9   | 86.5    | 69.9   | 117.2  | 77.1    | 145.9  | 94.7    | 54     | 0.714345395 | 102.375  | 92.925   | 9.45    | 1.101694915 | 0.6325  | -1.137 |
| 100584_at   | 650.4   | 688.1   | 629    | 704.2  | 764.8   | 872.2  | 923.4   | 747.2  | 0.025886932 | 667.925  | 826.9    | 158.975 | 0.807745798 | 0.01035 | 1.234  |
| 100585_at   | 52.4    | 45.5    | 11.2   | 10.3   | 42.8    | 82.2   | 29.4    | 37.6   | 0.304449243 | 29.85    | 48       | 18.15   | 0.621875    | 0.2258  | 1.939  |
| 100586_i_at | 53.1    | 74.7    | 80.8   | 55.7   | 76.3    | 76.1   | 101.6   | 44.7   | 0.553594992 | 66.075   | 74.675   | 8.6     | 0.884834282 | 0.6444  | 1.103  |
| 100587_f_at | 424.7   | 378.4   | 398.8  | 564.4  | 515     | 481.7  | 426.9   | 529.9  | 0.376132958 | 441.575  | 488.375  | 46.8    | 0.904171999 | 0.3203  | 1.116  |
| 100588_at   | 1063.8  | 1299.2  | 934.6  | 940.2  | 1228    | 1079.9 | 1148.8  | 1141.4 | 0.379622545 | 1059.45  | 1149.525 | 90.075  | 0.921641548 | 0.3125  | 1.094  |
| 100589_at   | 66.3    | 42.9    | 58.9   | 90.3   | 48.6    | 63.4   | 98.8    | 83.1   | 0.57039044  | 64.6     | 73.475   | 8.875   | 0.879210616 | 0.5797  | 1.137  |
| 100592_at   | 2868.6  | 2159.3  | 2118.3 | 1940.5 | 1995.4  | 2756.8 | 2181.6  | 1894.2 | 0.82565457  | 2271.675 | 2207     | 64.675  | 1.029304486 | 0.8191  | -1.029 |
| 100593_at   | 77.9    | 75.2    | 76.1   | 56.8   | 60.2    | 101.3  | 56.6    | 73.9   | 0.900131363 | 71.5     | 73       | 1.5     | 0.979452055 | 0.9918  | 1.002  |
| 100594_at   | 763.8   | 563     | 648.1  | 672.5  | 557     | 574    | 707.2   | 648    | 0.484127281 | 661.85   | 621.55   | 40.3    | 1.064837905 | 0.4893  | -1.064 |
| 100595_at   | 1947.7  | 2099.6  | 2682.5 | 2789.5 | 2308    | 2197.7 | 2912.2  | 2950.6 | 0.488223663 | 2379.825 | 2592.125 | 212.3   | 0.918098086 | 0.4802  | 1.092  |
| 100596_at   | 710.6   | 859.6   | 598.9  | 498.9  | 729.5   | 642.1  | 647.7   | 577.8  | 0.842247701 | 667      | 649.275  | 17.725  | 1.02729968  | 0.9382  | 1.01   |
| 100597_at   | 203.7   | 205.4   | 262.6  | 266    | 218.4   | 236.4  | 233.4   | 250.7  | 0.987859369 | 234.425  | 234.725  | 0.3     | 0.998721909 | 0.9204  | 1.008  |
| 100599_at   | 1706.6  | 1410.6  | 1570.2 | 1539.7 | 1429.2  | 1558.3 | 1536.6  | 1752.4 | 0.896145125 | 1556.775 | 1569.125 | 12.35   | 0.992129371 | 0.9008  | 1.008  |
| 100600_at   | 1492.6  | 2143    | 1977.3 | 1550.5 | 2439.9  | 2279.9 | 1963.4  | 2017.9 | 0.101633264 | 1790.85  | 2175.275 | 384.425 | 0.823275218 | 0.09649 | 1.224  |
| 100601_at   | 1136.4  | 1157.5  | 998.2  | 1188.2 | 1599.8  | 1011.9 | 1587.9  | 1470.5 | 0.117596748 | 1120.075 | 1417.525 | 297.45  | 0.790162431 | 0.1033  | 1.248  |
| 100602_at   | 24.2    | 15.4    | 19.3   | 23     | 16.9    | 35.5   | 21.5    | 27.4   | 0.334868026 | 20.475   | 25.325   | 4.85    | 0.808489635 | 0.3517  | 1.211  |
| 100603_at   | 703.2   | 694.7   | 860.3  | 793.8  | 820.9   | 662    | 954.5   | 885.9  | 0.400532151 | 763      | 830.825  | 67.825  | 0.918364276 | 0.4275  | 1.083  |
| 100605_at   | 296.5   | 254.3   | 308.2  | 358.1  | 281.2   | 357.1  | 249.4   | 350.6  | 0.881312611 | 304.275  | 309.575  | 5.3     | 0.982879755 | 0.9093  | 1.013  |
| 100606_at   | 2100    | 1899.5  | 2474.8 | 1878.3 | 2039.9  | 1899.4 | 2944.6  | 2432.7 | 0.417075739 | 2088.15  | 2329.15  | 241     | 0.896528777 | 0.4218  | 1.106  |
| 100607_at   | 1122.3  | 1115.2  | 1130.2 | 989    | 1331.6  | 1129.6 | 1211.6  | 1170.2 | 0.072136041 | 1089.175 | 1210.75  | 121.575 | 0.899587033 | 0.0685  | 1.111  |
| 100608_at   | 1209.4  | 1049.4  | 1171.1 | 1108.5 | 1251.8  | 1267.1 | 1237.8  | 1131.8 | 0.110964702 | 1134.6   | 1222.125 | 87.525  | 0.92838294  | 0.1142  | 1.078  |
| 100609_at   | 47.2    | 39.4    | 25.4   | 33.5   | 28.9    | 48.8   | 34.4    | 27.9   | 0.843448299 | 36.375   | 35       | 1.375   | 1.039285714 | 0.8385  | -1.04  |
| 100610_at   | 3607    | 3431.3  | 3451.8 | 3090.3 | 3605    | 3940.7 | 2961.7  | 2753.7 | 0.801623152 | 3395.1   | 3315.275 | 79.825  | 1.024077942 | 0.7282  | -1.033 |
| 100611_at   | 296.9   | 358.9   | 299.4  | 349.5  | 371.2   | 500.1  | 370.8   | 294.9  | 0.274021466 | 326.175  | 384.25   | 58.075  | 0.848861418 | 0.2556  | 1.162  |
| 100612_at   | 2730.5  | 2125.3  | 2200.8 | 1794.1 | 2056.1  | 1980.1 | 2072.6  | 1713   | 0.288754058 | 2212.675 | 1955.45  | 257.225 | 1.131542612 | 0.2798  | -1.122 |
| 100613_at   | 2705.3  | 2547.1  | 2053.1 | 2113.8 | 1979.9  | 2358.9 | 1864.3  | 2071.1 | 0.194260848 | 2354.825 | 2068.55  | 286.275 | 1.138394044 | 0.1848  | -1.135 |
| 100614_at   | 39.2    | 70.8    | 29.1   | 39.6   | 37.8    | 40.1   | 19.3    | 38.7   | 0.349637025 | 44.675   | 33.975   | 10.7    | 1.314937454 | 0.3475  | -1.297 |
| 100615_at   | 42.3    | 12.1    | 4.9    | 7.5    | 7.4     | 18.1   | 10.8    | 7.7    | 0.566108357 | 16.7     | 11       | 5.7     | 1.518181818 | 0.8084  | -1.138 |
| 100616_at   | 317.4   | 393.4   | 321.5  | 388.3  | 277.5   | 301.9  | 388.3   | 383    | 0.636198702 | 355.15   | 337.675  | 17.475  | 1.051750944 | 0.6054  | -1.058 |
| 100617_at   | 64.1    | 13      | 31.1   | 31.7   | 28.4    | 35.9   | 48      | 19.9   | 0.881058207 | 34.975   | 33.05    | 1.925   | 1.058245083 | 0.912   | 1.044  |
| 100618_f_at | 1462.6  | 1320.7  | 1279.2 | 1229.3 | 998.5   | 1702.2 | 1615.3  | 1441   | 0.522450771 | 1322.95  | 1439.25  | 116.3   | 0.919194025 | 0.6186  | 1.068  |
| 100619_r_at | 355.7   | 253.6   | 286    | 281.5  | 214.5   | 334.5  | 264.3   | 233.5  | 0.379188459 | 294.2    | 261.7    | 32.5    | 1.124188002 | 0.342   | -1.132 |
| 100620_at   | 95.6    | 51.8    | 46.7   | 47     | 33.2    | 73.3   | 35.9    | 71.2   | 0.684208657 | 60.275   | 53.4     | 6.875   | 1.128745318 | 0.6288  | -1.15  |
| 100621_at   | 2089.7  | 2097.2  | 1459.6 | 1127.3 | 1886.7  | 2132.6 | 1283.4  | 1494.9 | 0.985209241 | 1693.45  | 1699.4   | 5.95    | 0.996498764 | 0.9312  | 1.017  |
| 100622_at   | 1490.2  | 1550.4  | 1446.8 | 1614.7 | 1736    | 1587.5 | 1750.5  | 1664.6 | 0.0227536   | 1525.525 | 1684.65  | 159.125 | 0.905544178 | 0.02308 | 1.104  |
| 100623_at   | 42.4    | 29.4    | 23.3   | 38.9   | 31.1    | 53.2   | 33.6    | 45.4   | 0.321944733 | 33.5     | 40.825   | 7.325   | 0.820575628 | 0.3208  | 1.223  |
| 100626_at   | 92.6    | 62.9    | 60.2   | 88     | 57.4    | 68.2   | 84.9    | 69.3   | 0.57877389  | 75.925   | 69.95    | 5.975   | 1.085418156 | 0.6136  | -1.076 |
| 100628_at   | 4567.4  | 5524.9  | 4108.7 | 3166.5 | 4719.5  | 3796.5 | 3844.1  | 3506.4 | 0.532235397 | 4341.875 | 3966.625 | 375.25  | 1.094601834 | 0.5826  | -1.08  |
| 100629_at   | 1855.5  | 2423.7  | 1752   | 1721.4 | 2161    | 2062.8 | 1604.5  | 1799.9 | 0.886009352 | 1938.15  | 1907.05  | 31.1    | 1.01630791  | 0.9044  | 1.013  |



|             |         |         |         |         |         |         |         |         |             |           |           |          |             |           |        |
|-------------|---------|---------|---------|---------|---------|---------|---------|---------|-------------|-----------|-----------|----------|-------------|-----------|--------|
| 100630_f_at | 7079.6  | 7143    | 5077.4  | 5384.6  | 5916.8  | 6249.6  | 4806.6  | 4980.8  | 0.340593001 | 6171.15   | 5488.45   | 682.7    | 1.124388489 | 0.3507    | -1.118 |
| 100631_r_at | 223.7   | 335.4   | 230.9   | 284.1   | 232.2   | 543.9   | 215.4   | 185.3   | 0.786021227 | 268.525   | 294.2     | 25.675   | 0.912729436 | 0.9818    | 1.006  |
| 100632_at   | 373.7   | 344     | 328.5   | 380.7   | 290.4   | 304.8   | 344.2   | 358.6   | 0.16604874  | 356.725   | 324.5     | 32.225   | 1.099306626 | 0.1623    | -1.101 |
| 100633_at   | 2698.8  | 2826    | 2871.9  | 2341.2  | 3440.1  | 3186.8  | 3023.5  | 2699.6  | 0.088690296 | 2684.475  | 3087.5    | 403.025  | 0.869465587 | 0.08996   | 1.149  |
| 100634_at   | 78.8    | 76.7    | 80.5    | 68.3    | 47.1    | 87.3    | 68.5    | 88.9    | 0.775807495 | 76.075    | 72.95     | 3.125    | 1.04283756  | 0.6583    | -1.074 |
| 100635_at   | 4893.2  | 4760.5  | 4545.6  | 3880.1  | 4510.3  | 5257.1  | 4790.4  | 3918.1  | 0.79215823  | 4519.85   | 4618.975  | 99.125   | 0.978539611 | 0.8124    | 1.02   |
| 100636_at   | 810.9   | 1094.4  | 870     | 957.8   | 1095.9  | 906     | 1032.3  | 990.8   | 0.364299145 | 933.275   | 1006.25   | 72.975   | 0.927478261 | 0.338     | 1.083  |
| 100669_at   | 20.8    | 9.2     | 1.8     | 7.7     | 4.6     | 10      | 13.8    | 3       | 0.683725807 | 9.875     | 7.85      | 2.025    | 1.257961783 | 0.888     | -1.095 |
| 100670_at   | 17      | 7.3     | 3.3     | 5.5     | 10.9    | 5.7     | 4.8     | 3.4     | 0.574311772 | 8.275     | 6.2       | 2.075    | 1.334677419 | 0.6575    | -1.216 |
| 100671_at   | 23.9    | 2.5     | 8.4     | 21.5    | 3.7     | 3.9     | 14.6    | 3.8     | 0.254689378 | 14.075    | 6.5       | 7.575    | 2.165384615 | 0.3426    | -1.907 |
| 100672_at   | 13.3    | 1.4     | 8.7     | 3.4     | 0.5     | 10.2    | 16.5    | 3.7     | 0.826190918 | 6.7       | 7.725     | 1.025    | 0.867313916 | 0.8848    | -1.152 |
| 100673_f_at | 69.8    | 52.3    | 40.8    | 68.4    | 50.8    | 94.7    | 73.5    | 62.9    | 0.320805074 | 57.825    | 70.475    | 12.65    | 0.820503725 | 0.3269    | 1.215  |
| 100674_f_at | 57.2    | 30.9    | 20.4    | 36.8    | 32.5    | 73      | 8       | 32.5    | 0.991465646 | 36.325    | 36.5      | 0.175    | 0.995205479 | 0.718     | -1.211 |
| 100675_at   | 15.1    | 6.2     | 35.3    | 3.6     | 37.1    | 56.4    | 17.8    | 29      | 0.115335914 | 15.05     | 35.075    | 20.025   | 0.429080542 | 0.08961   | 3.103  |
| 100676_at   | 10      | 8.2     | 5.8     | 8.6     | 7.1     | 8.2     | 23.2    | 18.3    | 0.220850634 | 8.15      | 14.2      | 6.05     | 0.573943662 | 0.2007    | 1.569  |
| 100677_f_at | 25.3    | 77.4    | 10.5    | 8       | 39.4    | 76.6    | 12      | 25.1    | 0.721782672 | 30.3      | 38.275    | 7.975    | 0.791639451 | 0.5313    | 1.532  |
| 100678_s_at | 2.7     | 7.5     | 4.7     | 24.5    | 4.4     | 19.5    | 14.2    | 12      | 0.66827959  | 9.85      | 12.525    | 2.675    | 0.786427146 | 0.449     | 1.588  |
| 100679_at   | 32      | 10.7    | 9.7     | 11.7    | 5       | 14      | 8.4     | 9       | 0.292597785 | 16.025    | 9.1       | 6.925    | 1.760989011 | 0.2036    | -1.643 |
| 100680_at   | 12.5    | 5       | 11.6    | 16.2    | 12.8    | 25.3    | 4       | 18.9    | 0.480099586 | 11.325    | 15.25     | 3.925    | 0.742622951 | 0.718     | 1.199  |
| 100681_f_at | 20.1    | 6.4     | 35.1    | 42.5    | 34.5    | 38.6    | 30.1    | 8.1     | 0.869958861 | 26.025    | 27.825    | 1.8      | 0.935309973 | 0.8202    | 1.143  |
| 100682_f_at | 47.7    | 50.4    | 47.9    | 74.3    | 48.6    | 95.6    | 44.1    | 55.4    | 0.682687927 | 55.075    | 60.925    | 5.85     | 0.903980304 | 0.7394    | 1.073  |
| 100683_r_at | 106.8   | 40.8    | 98.2    | 81.6    | 24.2    | 176     | 102.6   | 86.2    | 0.676877348 | 81.85     | 97.25     | 15.4     | 0.841645244 | 0.9686    | 1.02   |
| 100684_at   | 1723.8  | 1700.5  | 1722.4  | 1732.6  | 1455.8  | 1429    | 1511.8  | 1514    | 0.000666292 | 1719.825  | 1477.65   | 242.175  | 1.163891991 | 0.0000509 | -1.164 |
| 100685_at   | 54.5    | 114.8   | 86.8    | 41.1    | 83.8    | 140     | 136     | 88.9    | 0.141176891 | 74.3      | 112.175   | 37.875   | 0.662357923 | 0.1347    | 1.587  |
| 100686_at   | 18040.6 | 18582.4 | 11923.1 | 13380.4 | 14207.7 | 13558.8 | 15995.8 | 16065.5 | 0.783495969 | 15481.625 | 14956.95  | 524.675  | 1.03507901  | 0.8751    | 1.02   |
| 100687_f_at | 35.3    | 8.9     | 15.7    | 33.8    | 18.3    | 42.9    | 11.6    | 3.9     | 0.705734608 | 23.425    | 19.175    | 4.25     | 1.221642764 | 0.5416    | -1.473 |
| 100688_at   | 4.1     | 18.2    | 8.5     | 3.8     | 4.7     | 13.9    | 10.5    | 9.2     | 0.820674933 | 8.65      | 9.575     | 0.925    | 0.903394256 | 0.6012    | 1.267  |
| 100689_at   | 21.7    | 10      | 1.6     | 1.9     | 19.1    | 14.9    | 1.9     | 3       | 0.889509302 | 8.8       | 9.725     | 0.925    | 0.904884319 | 0.8078    | 1.244  |
| 100690_at   | 72.3    | 106.8   | 80.9    | 94.5    | 83.5    | 105.4   | 60.5    | 40.8    | 0.362657477 | 88.625    | 72.55     | 16.075   | 1.22157133  | 0.3064    | -1.283 |
| 100691_at   | 3.6     | 3.7     | 3.1     | 2.1     | 2.3     | 32.5    | 3.9     | 4.1     | 0.374633978 | 3.125     | 10.7      | 7.575    | 0.292056075 | 0.3213    | 1.917  |
| 100692_at   | 37      | 56.5    | 22.3    | 25.1    | 30.7    | 40.8    | 26.3    | 72      | 0.597465472 | 35.225    | 42.45     | 7.225    | 0.829799764 | 0.584     | 1.193  |
| 100693_at   | 72.4    | 47.1    | 36.9    | 61.1    | 44.5    | 79.8    | 43.3    | 49.1    | 0.986841199 | 54.375    | 54.175    | 0.2      | 1.00369174  | 0.9802    | 1.005  |
| 100694_at   | 22878.9 | 24443.7 | 14057   | 16077.6 | 16745.7 | 18169.7 | 18189.4 | 17994.9 | 0.577021536 | 19364.3   | 17774.925 | 1589.375 | 1.089416692 | 0.676     | -1.061 |
| 100695_at   | 11.7    | 15.5    | 13.3    | 36.9    | 19.9    | 15.4    | 20.1    | 32.2    | 0.727453396 | 19.35     | 21.9      | 2.55     | 0.883561644 | 0.5325    | 1.221  |
| 100696_at   | 90.7    | 75.1    | 77.2    | 113.3   | 101.7   | 134.6   | 84.9    | 117.5   | 0.187888903 | 89.075    | 109.675   | 20.6     | 0.812172327 | 0.1793    | 1.231  |
| 100697_at   | 64.4    | 68.7    | 37      | 55.7    | 40.2    | 15.5    | 14      | 14.7    | 0.009941159 | 56.45     | 21.1      | 35.35    | 2.67535545  | 0.01004   | -2.909 |
| 100698_at   | 11      | 6.7     | 8.1     | 5.3     | 4.2     | 10.4    | 5       | 8.2     | 0.677273882 | 7.775     | 6.95      | 0.825    | 1.118705036 | 0.601     | -1.156 |
| 100699_at   | 6.2     | 3.9     | 5.7     | 8.5     | 3.4     | 5.5     | 5.9     | 7.3     | 0.674308969 | 6.075     | 5.525     | 0.55     | 1.099547511 | 0.686     | -1.1   |
| 100700_s_at | 2801.9  | 2638    | 3473.4  | 2983.7  | 2366.7  | 2459.4  | 2302.4  | 2695.1  | 0.056625416 | 2974.25   | 2455.9    | 518.35   | 1.211063154 | 0.03334   | -1.207 |
| 100701_r_at | 1024.3  | 881.6   | 1532.9  | 1193.5  | 1152.6  | 958.4   | 1233.8  | 1035.4  | 0.701011107 | 1158.075  | 1095.05   | 63.025   | 1.05755445  | 0.7733    | -1.04  |
| 100702_at   | 1673.5  | 933.2   | 995.1   | 850.7   | 710.8   | 982.6   | 515.2   | 780     | 0.15236212  | 1113.125  | 747.15    | 365.975  | 1.489828013 | 0.104     | -1.473 |
| 100703_at   | 60.7    | 56.8    | 43.1    | 53.5    | 37.7    | 78.5    | 44.7    | 55.2    | 0.96126326  | 53.525    | 54.025    | 0.5      | 0.990745025 | 0.9072    | 1.021  |
| 100704_at   | 11.4    | 6.5     | 9.8     | 2.3     | 6.1     | 12.2    | 10.4    | 21      | 0.241812798 | 7.5       | 12.425    | 4.925    | 0.60362173  | 0.2463    | 1.77   |
| 100705_at   | 28.4    | 21.7    | 57.3    | 30.4    | 55      | 37.7    | 46.3    | 55.5    | 0.177148966 | 34.45     | 48.625    | 14.175   | 0.70848329  | 0.1248    | 1.494  |
| 100706_f_at | 256.3   | 354.3   | 335.5   | 440.9   | 451.8   | 298.6   | 245.9   | 380     | 0.965377009 | 346.75    | 344.075   | 2.675    | 1.007774468 | 0.9304    | 1.016  |
| 100707_at   | 140.1   | 75      | 112.5   | 96.3    | 71.5    | 70      | 103.6   | 102.3   | 0.298276369 | 105.975   | 86.85     | 19.125   | 1.220207254 | 0.3039    | -1.211 |
| 100708_at   | 11102.9 | 13997.3 | 9917.2  | 12175.9 | 11854.6 | 11498.3 | 13489.8 | 12438.6 | 0.616169932 | 11798.325 | 12320.325 | 522      | 0.957630988 | 0.5629    | 1.051  |
| 100709_at   | 17.6    | 15.2    | 22.2    | 15.4    | 11.9    | 23.8    | 63.5    | 13.2    | 0.450903753 | 17.6      | 28.1      | 10.5     | 0.62633452  | 0.5669    | 1.269  |
| 100710_at   | 3027.3  | 3148.5  | 3259.6  | 3543.8  | 3864.1  | 3403.3  | 3531.9  | 3574.6  | 0.056187726 | 3244.8    | 3593.475  | 348.675  | 0.902969966 | 0.05371   | 1.108  |
| 100711_at   | 14303.4 | 18279.6 | 11186.7 | 12022.4 | 13692.6 | 12617.5 | 12263.6 | 13194.8 | 0.575202496 | 13948.025 | 12942.125 | 1005.9   | 1.07772294  | 0.6265    | -1.059 |
| 100712_at   | 43.9    | 15.8    | 46.5    | 75.8    | 48.5    | 92.7    | 42.1    | 41.8    | 0.556840749 | 45.5      | 56.275    | 10.775   | 0.808529542 | 0.4693    | 1.341  |
| 100713_at   | 209.4   | 272.9   | 347     | 289.3   | 329.3   | 222.7   | 305.1   | 313.6   | 0.737276048 | 279.65    | 292.675   | 13.025   | 0.955496711 | 0.7254    | 1.052  |
| 100714_at   | 30.9    | 26.8    | 13.5    | 16.2    | 30.1    | 20.9    | 7.9     | 14.9    | 0.608165437 | 21.85     | 18.45     | 3.4      | 1.184281843 | 0.5418    | -1.251 |
| 100715_at   | 4       | 4.3     | 2.1     | 3.1     | 1.9     | 5.2     | 3.4     | 5       | 0.608579713 | 3.375     | 3.875     | 0.5      | 0.870967742 | 0.7204    | 1.114  |
| 100716_at   | 48.5    | 61.3    | 39.6    | 61      | 32.5    | 87.3    | 50.7    | 83.5    | 0.486555192 | 52.6      | 63.5      | 10.9     | 0.828346457 | 0.6322    | 1.138  |
| 100717_at   | 464.4   | 332.1   | 420.1   | 449.9   | 373.7   | 626.3   | 388.1   | 389.2   | 0.7013873   | 416.625   | 444.325   | 27.7     | 0.937658246 | 0.7493    | 1.05   |



|             |         |         |         |         |         |         |         |         |             |           |           |          |             |          |        |
|-------------|---------|---------|---------|---------|---------|---------|---------|---------|-------------|-----------|-----------|----------|-------------|----------|--------|
| 100718_at   | 8795.8  | 11168.5 | 8604.5  | 10664.3 | 10151.1 | 9552.9  | 12429.1 | 11459.7 | 0.27937128  | 9808.275  | 10898.2   | 1089.925 | 0.899990365 | 0.2753   | 1.113  |
| 100719_f_at | 15.3    | 8.4     | 20.2    | 11.2    | 9.9     | 15      | 10.6    | 32.5    | 0.610311223 | 13.775    | 17        | 3.225    | 0.810294118 | 0.6883   | 1.151  |
| 100720_at   | 5436.9  | 5487.2  | 5249.4  | 6570.6  | 4038.1  | 3722    | 5270.5  | 5781.8  | 0.148435701 | 5686.025  | 4703.1    | 982.925  | 1.208995131 | 0.1332   | -1.224 |
| 100721_f_at | 75      | 69.9    | 55.1    | 46.8    | 46.6    | 51.2    | 65      | 40.1    | 0.240420949 | 61.7      | 50.725    | 10.975   | 1.21636274  | 0.239    | -1.214 |
| 100722_r_at | 88.4    | 21.9    | 18.9    | 20.8    | 18.9    | 36.7    | 52.2    | 28.8    | 0.864217488 | 37.5      | 34.15     | 3.35     | 1.098096633 | 0.862    | 1.08   |
| 100723_f_at | 892     | 795.7   | 923.5   | 1023.9  | 881.3   | 1054.5  | 1024.9  | 994.5   | 0.235356635 | 908.775   | 988.8     | 80.025   | 0.919068568 | 0.2351   | 1.09   |
| 100724_at   | 44.8    | 37.2    | 41.3    | 75.7    | 37.8    | 61.4    | 41.8    | 53.9    | 0.924843026 | 49.75     | 48.725    | 1.025    | 1.021036429 | 0.9975   | 1.001  |
| 100725_at   | 57.1    | 27      | 25.4    | 43.8    | 5.8     | 46      | 17.9    | 31      | 0.295357644 | 38.325    | 25.175    | 13.15    | 1.522343595 | 0.2588   | -1.846 |
| 100726_at   | 37.7    | 17.5    | 13.2    | 29.1    | 24.9    | 21.9    | 31.1    | 48.5    | 0.40955657  | 24.375    | 31.6      | 7.225    | 0.771360759 | 0.3565   | 1.343  |
| 100727_at   | 20275.9 | 20447.5 | 11717.9 | 11697.6 | 14552.8 | 13431.2 | 13174   | 13312.5 | 0.405966734 | 16034.725 | 13617.625 | 2417.1   | 1.177497912 | 0.4632   | -1.135 |
| 100728_at   | 87.7    | 33.7    | 114.3   | 133.1   | 14.9    | 39.8    | 191.7   | 157     | 0.866113183 | 92.2      | 100.85    | 8.65     | 0.914229053 | 0.7447   | -1.259 |
| 100729_at   | 14149.6 | 17094.8 | 9756.7  | 12264.5 | 12649.8 | 11854   | 12236.3 | 13919.1 | 0.709423926 | 13316.4   | 12664.8   | 651.6    | 1.051449687 | 0.808    | -1.032 |
| 100730_at   | 33.9    | 22.3    | 24.3    | 36.1    | 28.3    | 40.2    | 42.7    | 27.6    | 0.32927143  | 29.15     | 34.7      | 5.55     | 0.840057637 | 0.3268   | 1.194  |
| 100731_at   | 20.5    | 14.9    | 8.5     | 16      | 14.1    | 21      | 10.3    | 10.7    | 0.795222902 | 14.975    | 14.025    | 0.95     | 1.067736185 | 0.8092   | -1.064 |
| 100732_at   | 19907.3 | 20934   | 14423.1 | 14526.9 | 15514.8 | 15953.6 | 14894.6 | 16337   | 0.383161822 | 17447.825 | 15675     | 1772.825 | 1.113098884 | 0.3965   | -1.097 |
| 100733_at   | 5417.8  | 5530.6  | 5069.2  | 4757.4  | 5932.1  | 5092.5  | 5711.1  | 4671.3  | 0.659411604 | 5193.75   | 5351.75   | 158      | 0.970476947 | 0.6865   | 1.028  |
| 100734_at   | 15754   | 17201.3 | 11355.8 | 13129.1 | 14048.5 | 13819.2 | 13869.2 | 14513.7 | 0.835636297 | 14360.05  | 14062.65  | 297.4    | 1.021148219 | 0.9319   | 1.008  |
| 100735_at   | 13.4    | 6.1     | 5.2     | 2.5     | 8.3     | 1.4     | 4.3     | 1.7     | 0.352786307 | 6.8       | 3.925     | 2.875    | 1.732484076 | 0.2823   | -1.891 |
| 100736_at   | 20.5    | 10.5    | 37.7    | 17.8    | 14.5    | 28      | 28.6    | 44.1    | 0.423430284 | 21.625    | 28.8      | 7.175    | 0.750868056 | 0.3981   | 1.374  |
| 100737_at   | 82.9    | 76.7    | 40.3    | 57.9    | 37.9    | 116.8   | 27.9    | 41.1    | 0.724523243 | 64.45     | 55.925    | 8.525    | 1.152436299 | 0.4743   | -1.308 |
| 100738_at   | 110.8   | 27.1    | 26.1    | 21.4    | 15.1    | 38.8    | 29.4    | 27.2    | 0.453102925 | 46.35     | 27.625    | 18.725   | 1.677828054 | 0.4834   | -1.376 |
| 100739_at   | 31.1    | 6.2     | 11      | 24.7    | 21.6    | 48      | 12.1    | 34.1    | 0.316057955 | 18.25     | 28.95     | 10.7     | 0.630397237 | 0.313    | 1.694  |
| 100740_at   | 17.2    | 16.6    | 11.7    | 8.2     | 8.9     | 31.2    | 12.4    | 40.4    | 0.288246453 | 13.425    | 23.225    | 9.8      | 0.578040904 | 0.3489   | 1.502  |
| 100741_at   | 29.9    | 31.9    | 23.9    | 34.4    | 38      | 31.1    | 39.4    | 13.5    | 0.944176558 | 30.025    | 30.5      | 0.475    | 0.98442623  | 0.8397   | -1.057 |
| 100742_at   | 278.1   | 279.9   | 229     | 314.6   | 305.1   | 304.5   | 259.8   | 304.1   | 0.427564832 | 275.4     | 293.375   | 17.975   | 0.938730294 | 0.4152   | 1.07   |
| 100743_at   | 159.8   | 154.1   | 150.5   | 152.2   | 141.4   | 222.8   | 169.9   | 130.3   | 0.604453995 | 154.15    | 166.1     | 11.95    | 0.928055388 | 0.6738   | 1.054  |
| 100744_at   | 11.9    | 11.5    | 15.8    | 8.6     | 10.3    | 20.2    | 13.8    | 28.9    | 0.221743192 | 11.95     | 18.3      | 6.35     | 0.653005464 | 0.1932   | 1.457  |
| 100745_r_at | 3.2     | 0.1     | 0.1     | 3.8     | 0.4     | 1.8     | 4       | 0.3     | 0.898356965 | 1.8       | 1.625     | 0.175    | 1.107692308 | 0.6641   | 1.747  |
| 100746_at   | 40.9    | 24.3    | 48      | 42.1    | 38.2    | 22.8    | 58.7    | 21.2    | 0.736251646 | 38.825    | 35.225    | 3.6      | 1.102200142 | 0.6065   | -1.166 |
| 100747_at   | 43.2    | 11.1    | 35.1    | 6.6     | 34.5    | 37.7    | 39.4    | 34.9    | 0.253481853 | 24        | 36.625    | 12.625   | 0.655290102 | 0.1761   | 2.007  |
| 100748_at   | 9.3     | 7       | 5.2     | 7.1     | 2.8     | 12.7    | 6.2     | 15      | 0.534656719 | 7.15      | 9.175     | 2.025    | 0.779291553 | 0.8542   | 1.081  |
| 100749_at   | 161.3   | 115.1   | 74      | 109.6   | 125.1   | 120.1   | 73.7    | 122.1   | 0.834878802 | 115       | 110.25    | 4.75     | 1.0430839   | 0.8988   | -1.027 |
| 100750_at   | 37.7    | 38.4    | 27.2    | 51.2    | 29.5    | 48.1    | 35.7    | 31.7    | 0.724992297 | 38.625    | 36.25     | 2.375    | 1.065517241 | 0.7478   | -1.058 |
| 100751_at   | 247.4   | 177.7   | 285.1   | 336.5   | 122.4   | 225.3   | 444.6   | 336.1   | 0.803417304 | 261.675   | 282.1     | 20.425   | 0.927596597 | 0.9858   | -1.006 |
| 100752_at   | 72.2    | 14      | 38.9    | 34.7    | 13.9    | 51.7    | 41.1    | 69.5    | 0.814777886 | 39.95     | 44.05     | 4.1      | 0.90692395  | 0.8415   | 1.107  |
| 100753_at   | 5563.8  | 6287.9  | 5864.5  | 7135.3  | 6334.4  | 6173.5  | 7174.7  | 7282.2  | 0.280609728 | 6212.875  | 6741.2    | 528.325  | 0.921627455 | 0.269    | 1.087  |
| 100754_at   | 11.8    | 11.3    | 4.9     | 8.5     | 9.1     | 15.2    | 5.9     | 6.1     | 0.985805766 | 9.125     | 9.075     | 0.05     | 1.005509642 | 0.9235   | -1.03  |
| 100755_at   | 193.8   | 107.9   | 105.3   | 166.6   | 92.5    | 209.8   | 129.6   | 173.1   | 0.823643167 | 143.4     | 151.25    | 7.85     | 0.948099174 | 0.8617   | 1.044  |
| 100756_r_at | 398.5   | 542.1   | 328.2   | 206.6   | 171.8   | 185.2   | 166     | 154.1   | 0.064506802 | 368.85    | 169.275   | 199.575  | 2.178998671 | 0.01261  | -2.06  |
| 100757_at   | 245.2   | 255.9   | 287.6   | 307     | 176.2   | 354.5   | 261.6   | 268.5   | 0.834653572 | 273.925   | 265.2     | 8.725    | 1.032899698 | 0.7163   | -1.06  |
| 100758_at   | 18128.2 | 22383.1 | 12941.3 | 14782.2 | 16544.9 | 14905.8 | 16142.2 | 16517.7 | 0.656524777 | 17058.7   | 16027.65  | 1031.05  | 1.064329456 | 0.746    | -1.042 |
| 100759_at   | 135.4   | 105.2   | 186     | 217.5   | 150.5   | 149.3   | 170.1   | 179.3   | 0.963838075 | 161.025   | 162.3     | 1.275    | 0.992144177 | 0.8058   | 1.044  |
| 100760_at   | 43.4    | 5       | 6.8     | 32.5    | 26.8    | 49.1    | 45.5    | 23.9    | 0.262525181 | 21.925    | 36.325    | 14.4     | 0.603578802 | 0.1896   | 2.335  |
| 100761_at   | 22.4    | 17.3    | 49.5    | 54.5    | 7.3     | 39.6    | 48.1    | 24.8    | 0.661488683 | 35.925    | 29.95     | 5.975    | 1.199499165 | 0.6034   | -1.324 |
| 100762_at   | 18.8    | 20      | 13.1    | 19.2    | 16.1    | 11.2    | 16.6    | 21.3    | 0.592240784 | 17.775    | 16.3      | 1.475    | 1.090490798 | 0.5781   | -1.101 |
| 100763_at   | 28.3    | 7.4     | 7.6     | 20      | 19.9    | 33.8    | 28.7    | 27.8    | 0.104618491 | 15.825    | 27.55     | 11.725   | 0.574410163 | 0.09645  | 2.025  |
| 100764_at   | 75.6    | 76.4    | 42.9    | 61.8    | 53.6    | 127.6   | 62.1    | 14.3    | 0.993226472 | 64.175    | 64.4      | 0.225    | 0.996506211 | 0.6441   | -1.26  |
| 100765_at   | 102.4   | 88.2    | 39.5    | 26.5    | 47.2    | 74      | 17.3    | 17      | 0.316061567 | 64.15     | 38.875    | 25.275   | 1.650160772 | 0.3015   | -1.741 |
| 100766_at   | 70.8    | 51.6    | 61.7    | 64.2    | 26.5    | 80.5    | 57.2    | 70      | 0.790746137 | 62.075    | 58.55     | 3.525    | 1.060204953 | 0.6264   | -1.14  |
| 100767_at   | 6.2     | 14.7    | 1.8     | 4.1     | 2.5     | 7.4     | 6.4     | 3.7     | 0.605768327 | 6.7       | 5         | 1.7      | 1.34        | 0.8461   | -1.109 |
| 100768_at   | 29.2    | 29.7    | 24.3    | 21.5    | 9.1     | 6.2     | 13      | 6.7     | 0.000565973 | 26.175    | 8.75      | 17.425   | 2.991428571 | 0.000852 | -3.095 |
| 100769_at   | 55.1    | 47.7    | 43.4    | 66.6    | 66.8    | 87      | 91.7    | 87.6    | 0.00740073  | 53.2      | 83.275    | 30.075   | 0.638847193 | 0.008489 | 1.575  |
| 100771_at   | 182.2   | 129.4   | 100.5   | 25.6    | 120.7   | 113.4   | 120.7   | 115.8   | 0.817626628 | 109.425   | 117.65    | 8.225    | 0.930089248 | 0.5289   | 1.333  |
| 100772_g_at | 40      | 33      | 58.6    | 54.5    | 65.1    | 71.7    | 58.4    | 92.4    | 0.038418127 | 46.525    | 71.9      | 25.375   | 0.647079277 | 0.0364   | 1.563  |
| 100773_at   | 7.4     | 11      | 8.1     | 6.7     | 6.6     | 8.2     | 5.7     | 7.8     | 0.318036412 | 8.3       | 7.075     | 1.225    | 1.173144876 | 0.3102   | -1.162 |
| 100774_at   | 89.6    | 63.6    | 46.3    | 95.4    | 92.9    | 96.7    | 124.3   | 78      | 0.158227537 | 73.725    | 97.975    | 24.25    | 0.75248788  | 0.159    | 1.364  |



|             |         |         |         |         |         |         |         |         |             |           |           |         |             |         |        |
|-------------|---------|---------|---------|---------|---------|---------|---------|---------|-------------|-----------|-----------|---------|-------------|---------|--------|
| 100775_at   | 145.9   | 121.1   | 89.2    | 158.3   | 119.8   | 210.7   | 160.5   | 203.7   | 0.139255238 | 128.625   | 173.675   | 45.05   | 0.740607456 | 0.1523  | 1.349  |
| 100776_at   | 63.6    | 22.2    | 26.7    | 8.2     | 61.5    | 31.2    | 65      | 27.3    | 0.33796481  | 30.175    | 46.25     | 16.075  | 0.652432432 | 0.2548  | 1.823  |
| 100778_at   | 57.7    | 40.7    | 34.6    | 54.7    | 7.4     | 69.2    | 61      | 52.1    | 0.974791741 | 46.925    | 47.425    | 0.5     | 0.989457037 | 0.6604  | -1.284 |
| 100779_at   | 56.8    | 39.1    | 51.6    | 16.7    | 54      | 91.6    | 18.4    | 14.7    | 0.864698779 | 41.05     | 44.675    | 3.625   | 0.918858422 | 0.868   | -1.094 |
| 100780_at   | 17986.5 | 22023.2 | 14062.2 | 16067.4 | 16466.8 | 16513.7 | 17266.3 | 16843.5 | 0.68484174  | 17534.825 | 16772.575 | 762.25  | 1.045446212 | 0.757   | 1.031  |
| 100828_at   | 349.3   | 284.4   | 259.7   | 323.1   | 289.1   | 319.4   | 278.7   | 235.2   | 0.408886403 | 304.125   | 280.6     | 23.525  | 1.083838204 | 0.4163  | -1.083 |
| 100839_at   | 34.8    | 30.4    | 15.5    | 23.6    | 21.7    | 63.9    | 12.2    | 26.4    | 0.702965447 | 26.075    | 31.05     | 4.975   | 0.839774557 | 0.9297  | 1.036  |
| 100876_at   | 554.6   | 534.8   | 420     | 405.8   | 528.9   | 706.4   | 430     | 618.7   | 0.247413665 | 478.8     | 571       | 92.2    | 0.838528897 | 0.2534  | 1.184  |
| 100877_at   | 3552.2  | 3332.5  | 3499.6  | 2353.6  | 3214.2  | 3161.2  | 2804    | 2732.5  | 0.536448259 | 3184.475  | 2977.975  | 206.5   | 1.069342422 | 0.6133  | -1.058 |
| 100878_at   | 1234.4  | 1396    | 1631.2  | 1706.7  | 1445.7  | 1036.6  | 1774.3  | 1367.2  | 0.661693933 | 1492.075  | 1405.95   | 86.125  | 1.061257513 | 0.6216  | -1.072 |
| 100879_at   | 188.1   | 196.7   | 181.5   | 187.7   | 424.9   | 294.4   | 139.7   | 266.4   | 0.210642737 | 188.5     | 281.35    | 92.85   | 0.669984006 | 0.2089  | 1.386  |
| 100880_at   | 192     | 303.5   | 240     | 243.4   | 360.3   | 268.8   | 327     | 390.1   | 0.038459905 | 244.725   | 336.55    | 91.825  | 0.727157926 | 0.03983 | 1.38   |
| 100882_at   | 35.5    | 8.6     | 18.5    | 22      | 13.6    | 49.8    | 27.7    | 9.1     | 0.730769016 | 21.15     | 25.05     | 3.9     | 0.844311377 | 0.8758  | 1.081  |
| 100883_at   | 103     | 38.8    | 24.7    | 32.2    | 22.9    | 39.4    | 29.4    | 54.8    | 0.537143473 | 49.675    | 36.625    | 13.05   | 1.356313993 | 0.6103  | -1.216 |
| 100884_at   | 5393.9  | 5846.3  | 4167.3  | 3836.8  | 4566    | 4113.3  | 4060.4  | 3948.9  | 0.279718879 | 4811.075  | 4172.15   | 638.925 | 1.153140467 | 0.2684  | -1.138 |
| 100885_at   | 536.8   | 362.2   | 491.1   | 557.2   | 472.8   | 423.8   | 548.2   | 510.3   | 0.971115015 | 486.825   | 488.775   | 1.95    | 0.996010434 | 0.9113  | 1.013  |
| 100886_f_at | 827.3   | 812.1   | 645.6   | 653     | 851.5   | 884     | 662.5   | 687.5   | 0.639915629 | 734.5     | 771.375   | 36.875  | 0.952195754 | 0.6486  | 1.049  |
| 100887_at   | 571.5   | 586.7   | 626.9   | 852.6   | 416.8   | 597.9   | 813.3   | 827.9   | 0.970574323 | 659.425   | 663.975   | 4.55    | 0.993147332 | 0.9323  | -1.017 |
| 100888_at   | 9.2     | 11.2    | 8.6     | 8.7     | 9.3     | 10.2    | 8.8     | 18      | 0.400009843 | 9.425     | 11.575    | 2.15    | 0.81425486  | 0.3701  | 1.186  |
| 100889_at   | 762.7   | 603.2   | 752.3   | 728.7   | 516.8   | 635.7   | 473.6   | 502.3   | 0.012832533 | 711.725   | 532.1     | 179.625 | 1.337577523 | 0.01312 | -1.34  |
| 100890_at   | 493     | 354.9   | 306.8   | 313.5   | 181.1   | 368.4   | 283.6   | 255.1   | 0.153665672 | 367.05    | 272.05    | 95      | 1.349200515 | 0.1394  | -1.366 |
| 100891_at   | 51.5    | 12.5    | 30.4    | 11.3    | 39      | 82.4    | 26.5    | 38      | 0.24654845  | 26.425    | 46.475    | 20.05   | 0.568585261 | 0.174   | 1.957  |
| 100892_at   | 620.8   | 624.7   | 686.6   | 636.8   | 718.4   | 615.9   | 649.8   | 543.3   | 0.805499085 | 642.225   | 631.85    | 10.375  | 1.016420036 | 0.7541  | 1.021  |
| 100893_at   | 901.5   | 1077.9  | 906.3   | 903.4   | 1507.2  | 1240    | 1001.5  | 1225.2  | 0.057208408 | 947.275   | 1243.475  | 296.2   | 0.761796578 | 0.03099 | 1.303  |
| 100894_at   | 545.2   | 470.6   | 416.9   | 416.5   | 566.8   | 447.2   | 501.4   | 479.7   | 0.39297365  | 462.3     | 498.775   | 36.475  | 0.926870834 | 0.3698  | 1.082  |
| 100895_at   | 485.6   | 462     | 325.7   | 348.1   | 445.1   | 408.9   | 395     | 354.4   | 0.923597545 | 405.35    | 400.85    | 4.5     | 1.011226144 | 0.9974  | 1      |
| 100896_at   | 19.3    | 13.5    | 37.1    | 45      | 32      | 26      | 23.5    | 15.2    | 0.605544667 | 28.725    | 24.175    | 4.55    | 1.188210962 | 0.7744  | -1.101 |
| 100897_f_at | 116.2   | 91.4    | 110.4   | 152.1   | 126.4   | 122     | 81.9    | 163     | 0.791128241 | 117.525   | 123.325   | 5.8     | 0.952969795 | 0.8463  | 1.036  |
| 100898_r_at | 10.7    | 7.2     | 6.7     | 11.1    | 14.4    | 9.7     | 9.1     | 15.3    | 0.158505368 | 8.925     | 12.125    | 3.2     | 0.736082474 | 0.1532  | 1.356  |
| 100899_s_at | 536.1   | 509.7   | 603.7   | 637.6   | 543.7   | 497.4   | 602.1   | 541     | 0.510155962 | 571.775   | 546.05    | 25.725  | 1.047111107 | 0.5196  | -1.045 |
| 100900_at   | 717.4   | 745.2   | 1051    | 1329.2  | 876.4   | 722.6   | 949.4   | 1034.3  | 0.701909768 | 960.7     | 895.675   | 65.025  | 1.072598878 | 0.7916  | -1.047 |
| 100901_at   | 74.4    | 79.9    | 129.7   | 173.7   | 22.1    | 70.7    | 140.2   | 122.9   | 0.500834575 | 114.425   | 88.975    | 25.45   | 1.286035403 | 0.424   | -1.492 |
| 100902_at   | 488.8   | 342     | 607.5   | 523.4   | 383.7   | 439.3   | 546.4   | 460.6   | 0.633588212 | 490.425   | 457.5     | 32.925  | 1.071967213 | 0.7055  | -1.058 |
| 100903_at   | 1075.8  | 1057.4  | 848.9   | 1103.1  | 1011.5  | 1020    | 938.5   | 968.4   | 0.584492065 | 1021.3    | 984.6     | 36.7    | 1.03727402  | 0.6333  | 1.032  |
| 100904_at   | 578.6   | 460     | 372.8   | 431     | 548.4   | 544.6   | 383.7   | 417.7   | 0.837759636 | 460.6     | 473.6     | 13      | 0.972550676 | 0.8352  | 1.029  |
| 100905_at   | 229.5   | 338.4   | 411.5   | 405.2   | 587.5   | 359.8   | 435.7   | 419.9   | 0.155772427 | 346.15    | 450.725   | 104.575 | 0.767984913 | 0.1592  | 1.315  |
| 100906_at   | 256.9   | 178.5   | 151     | 154.7   | 137.8   | 281.5   | 175.4   | 208.3   | 0.707466818 | 185.275   | 200.75    | 15.475  | 0.922914072 | 0.7313  | 1.072  |
| 100907_at   | 240.6   | 338.9   | 276.3   | 177.1   | 290.6   | 284.6   | 304     | 307.3   | 0.340282831 | 258.225   | 296.625   | 38.4    | 0.870543616 | 0.2746  | 1.18   |
| 100908_at   | 273.4   | 351.5   | 276.8   | 225     | 331.6   | 285     | 349.6   | 420.8   | 0.141544082 | 281.675   | 346.75    | 65.075  | 0.812328767 | 0.134   | 1.235  |
| 100909_at   | 73.3    | 38.7    | 74      | 34.5    | 66.6    | 97.5    | 118.7   | 81.1    | 0.060160384 | 55.125    | 90.975    | 35.85   | 0.605935697 | 0.06442 | 1.713  |
| 100910_at   | 715.9   | 840.9   | 614.4   | 398.9   | 761     | 472.4   | 628     | 598.7   | 0.813498114 | 642.525   | 615.025   | 27.5    | 1.04471363  | 0.911   | -1.022 |
| 100911_at   | 763.6   | 550.5   | 877.4   | 642.2   | 478.3   | 677     | 557.4   | 611.8   | 0.186191402 | 708.425   | 581.125   | 127.3   | 1.219057862 | 0.1793  | -1.21  |
| 100912_at   | 294.8   | 259.9   | 268.6   | 239.7   | 299.1   | 354.7   | 250     | 244.3   | 0.490029541 | 265.75    | 287.025   | 21.275  | 0.925877537 | 0.5094  | 1.07   |
| 100913_at   | 48.7    | 39.6    | 27.9    | 47.2    | 9.8     | 20      | 32.4    | 41.1    | 0.128512805 | 40.85     | 25.825    | 15.025  | 1.581800581 | 0.1468  | -1.764 |
| 100914_at   | 339.4   | 203.9   | 241.7   | 192.5   | 510.8   | 476     | 187.8   | 355.9   | 0.156353618 | 244.375   | 382.625   | 138.25  | 0.63868017  | 0.1722  | 1.499  |
| 100915_at   | 1557.2  | 1818.5  | 2583.4  | 2585.2  | 1537.7  | 1635.6  | 2000.1  | 2211.9  | 0.39024723  | 2136.075  | 1846.325  | 289.75  | 1.156933368 | 0.4208  | -1.142 |
| 100916_at   | 8.4     | 18      | 5.9     | 24.4    | 2.4     | 4.8     | 3.2     | 10      | 0.122208989 | 14.175    | 5.1       | 9.075   | 2.779411765 | 0.06592 | -2.782 |
| 100917_at   | 223     | 175.8   | 133.8   | 149.6   | 194.4   | 212.4   | 212.8   | 196.3   | 0.184967386 | 170.55    | 203.975   | 33.425  | 0.836131879 | 0.1335  | 1.218  |
| 100920_at   | 37.1    | 46      | 18      | 42.1    | 25      | 37.2    | 21.9    | 29.9    | 0.351539107 | 35.8      | 28.5      | 7.3     | 1.256140351 | 0.467   | -1.207 |
| 100921_at   | 2901.5  | 2909.9  | 1840.5  | 1908.9  | 3099.3  | 2914.9  | 2213.6  | 2003.2  | 0.689477895 | 2390.2    | 2557.75   | 167.55  | 0.934493207 | 0.6648  | 1.078  |
| 100923_at   | 619.2   | 470.1   | 544.2   | 822.3   | 259.3   | 446     | 511.3   | 532.3   | 0.123319494 | 613.95    | 437.225   | 176.725 | 1.404196924 | 0.1328  | -1.426 |
| 100924_at   | 37.4    | 42.3    | 28.8    | 39      | 11.8    | 56      | 33.7    | 42.1    | 0.925263937 | 36.875    | 35.9      | 0.975   | 1.027158774 | 0.6647  | -1.172 |
| 100925_at   | 85.3    | 63.7    | 117.2   | 134.3   | 80.8    | 77.8    | 139.7   | 127     | 0.791089054 | 100.125   | 106.325   | 6.2     | 0.94168822  | 0.7782  | 1.069  |
| 100926_at   | 27.1    | 3.7     | 6.1     | 6.5     | 3.8     | 15      | 13.2    | 2.9     | 0.749673135 | 10.85     | 8.725     | 2.125   | 1.243553009 | 0.8161  | -1.157 |
| 100927_at   | 724.9   | 764.8   | 887.4   | 729.8   | 630.1   | 567.6   | 628.1   | 751.8   | 0.050222256 | 776.725   | 644.4     | 132.325 | 1.205346058 | 0.04567 | -1.208 |
| 100928_at   | 1087.5  | 1194    | 1321.5  | 1240.7  | 1371.5  | 1359.3  | 1655.1  | 1521.7  | 0.02395217  | 1210.925  | 1476.9    | 265.975 | 0.819909947 | 0.01892 | 1.219  |



|             |        |        |        |        |        |        |        |        |             |          |          |         |             |         |        |
|-------------|--------|--------|--------|--------|--------|--------|--------|--------|-------------|----------|----------|---------|-------------|---------|--------|
| 100929_at   | 139.4  | 80.7   | 199.6  | 190    | 145.1  | 98     | 200.1  | 189.8  | 0.87669478  | 152.425  | 158.25   | 5.825   | 0.963191153 | 0.8311  | 1.061  |
| 100931_at   | 201.8  | 211.8  | 253.7  | 240.1  | 217.6  | 322.2  | 266.3  | 253    | 0.191354414 | 226.85   | 264.775  | 37.925  | 0.856765178 | 0.1754  | 1.161  |
| 100932_at   | 374.6  | 437.3  | 547    | 547.8  | 396.1  | 328.9  | 466.9  | 453    | 0.267684158 | 476.675  | 411.225  | 65.45   | 1.159158611 | 0.2826  | -1.155 |
| 100933_at   | 299.6  | 248.3  | 319.6  | 322.6  | 254.7  | 231.8  | 237.1  | 281.4  | 0.072016982 | 297.525  | 251.25   | 46.275  | 1.184179104 | 0.0677  | -1.181 |
| 100935_at   | 495.4  | 430.7  | 340.2  | 393.8  | 445.8  | 556    | 380.2  | 440.1  | 0.440870115 | 415.025  | 455.525  | 40.5    | 0.911091598 | 0.4349  | 1.097  |
| 100938_at   | 66.1   | 44.4   | 29.6   | 54.4   | 48.2   | 47.7   | 47.9   | 45     | 0.866042771 | 48.625   | 47.2     | 1.425   | 1.030190678 | 0.9488  | 1.012  |
| 100939_at   | 149    | 77     | 110.4  | 141.6  | 107.5  | 131.1  | 143.1  | 136.3  | 0.609801411 | 119.5    | 129.5    | 10      | 0.922779923 | 0.5371  | 1.113  |
| 100941_at   | 532.5  | 504.1  | 635    | 719.5  | 492.1  | 547.1  | 597.6  | 658.1  | 0.707276532 | 597.775  | 573.725  | 24.05   | 1.041919038 | 0.7324  | -1.037 |
| 100943_at   | 456.3  | 381    | 534    | 548.8  | 542.1  | 578    | 649.3  | 554    | 0.077810032 | 480.025  | 580.85   | 100.825 | 0.82641818  | 0.0773  | 1.22   |
| 100944_at   | 24.5   | 7.6    | 22.3   | 37.7   | 27.3   | 62.4   | 33.9   | 29.4   | 0.190953954 | 23.025   | 38.25    | 15.225  | 0.601960784 | 0.1757  | 1.818  |
| 100946_at   | 508.8  | 522.3  | 806.5  | 859.7  | 500.7  | 580.6  | 785.1  | 817    | 0.977932786 | 674.325  | 670.85   | 3.475   | 1.005179996 | 0.9875  | 1.003  |
| 100947_at   | 150.5  | 159.7  | 173.4  | 225.4  | 111.5  | 204.9  | 164.9  | 241.6  | 0.919126453 | 177.25   | 180.725  | 3.475   | 0.980771891 | 0.968   | 1.008  |
| 100948_at   | 264.5  | 324    | 312.8  | 391.9  | 401.3  | 336.2  | 274.8  | 340.8  | 0.698487933 | 323.3    | 338.275  | 14.975  | 0.955731284 | 0.6943  | 1.047  |
| 100949_at   | 263.9  | 319.6  | 285    | 261.9  | 195.1  | 230.5  | 265.2  | 271.4  | 0.109679808 | 282.6    | 240.55   | 42.05   | 1.174807732 | 0.1108  | -1.181 |
| 100951_at   | 828.3  | 915.2  | 1090.8 | 1273.5 | 978.1  | 860.3  | 1167.2 | 1278.4 | 0.757119294 | 1026.95  | 1071     | 44.05   | 0.958870215 | 0.747   | 1.045  |
| 100952_at   | 320.5  | 311.3  | 374.8  | 517.5  | 401.5  | 393    | 328.6  | 384.8  | 0.940067158 | 381.025  | 376.975  | 4.05    | 1.010743418 | 0.9528  | 1.008  |
| 100953_at   | 708.4  | 534.2  | 686.8  | 627.6  | 526.9  | 885.9  | 571    | 515.4  | 0.887532848 | 639.25   | 624.8    | 14.45   | 1.023127401 | 0.7725  | -1.044 |
| 100954_at   | 301.8  | 365.6  | 409.3  | 483.8  | 487.6  | 442.3  | 390.6  | 354.4  | 0.57535755  | 390.125  | 418.725  | 28.6    | 0.931697415 | 0.5435  | 1.081  |
| 100955_at   | 335.6  | 444.3  | 334.9  | 529.1  | 572.8  | 414    | 371.1  | 456.1  | 0.531124784 | 410.975  | 453.5    | 42.525  | 0.906229327 | 0.4997  | 1.11   |
| 100956_at   | 6      | 5      | 1.9    | 3.6    | 3.7    | 8.6    | 2.6    | 20.8   | 0.335768124 | 4.125    | 8.925    | 4.8     | 0.462184874 | 0.3518  | 1.702  |
| 100957_at   | 723.6  | 897.8  | 946.8  | 1325.8 | 1097.4 | 866.3  | 1241   | 1136.7 | 0.487720571 | 973.5    | 1085.35  | 111.85  | 0.896945686 | 0.4301  | 1.132  |
| 100958_at   | 396.2  | 346.8  | 431.3  | 492.9  | 293.8  | 314.8  | 430.6  | 396.3  | 0.243410708 | 416.8    | 358.875  | 57.925  | 1.161407175 | 0.2373  | -1.166 |
| 100959_at   | 732.4  | 985    | 678.3  | 632.6  | 938.9  | 809    | 1048.2 | 897.4  | 0.133127207 | 757.075  | 923.375  | 166.3   | 0.819899824 | 0.1091  | 1.232  |
| 100960_g_at | 669.3  | 726.9  | 545.3  | 530.1  | 595    | 702.8  | 623.2  | 565.5  | 0.949760889 | 617.9    | 621.625  | 3.725   | 0.994007641 | 0.9011  | 1.012  |
| 100961_at   | 493    | 484.1  | 567.7  | 528.6  | 547.4  | 634.5  | 457    | 478.6  | 0.814907735 | 518.35   | 529.375  | 11.025  | 0.979173554 | 0.8638  | 1.015  |
| 100962_at   | 810.1  | 770.5  | 768.9  | 909    | 660.7  | 614.3  | 686    | 811.4  | 0.065895519 | 814.625  | 693.1    | 121.525 | 1.175335449 | 0.05913 | -1.179 |
| 100963_at   | 373.2  | 537.9  | 234.1  | 258.5  | 347.7  | 357.9  | 216.7  | 272.4  | 0.531563735 | 350.925  | 298.675  | 52.25   | 1.174939315 | 0.5934  | -1.134 |
| 100964_at   | 698.3  | 835.6  | 698.1  | 740.1  | 864.4  | 680.4  | 728.3  | 750.6  | 0.807972196 | 743.025  | 755.925  | 12.9    | 0.982934815 | 0.8144  | 1.016  |
| 100965_at   | 836    | 551.1  | 612.8  | 617.5  | 631.6  | 840.1  | 503.1  | 493.7  | 0.72849109  | 654.35   | 617.125  | 37.225  | 1.060320032 | 0.6638  | -1.072 |
| 100966_at   | 15.9   | 22.2   | 17.4   | 35.1   | 35.8   | 42.2   | 33.6   | 23.9   | 0.101096344 | 22.65    | 33.875   | 11.225  | 0.668634686 | 0.09075 | 1.538  |
| 100967_at   | 4      | 54.4   | 5.3    | 23.6   | 15.5   | 43.2   | 3      | 31.1   | 0.928640828 | 21.825   | 23.2     | 1.375   | 0.940732759 | 0.8191  | 1.227  |
| 100968_at   | 273.4  | 295.2  | 361.2  | 320.1  | 346.2  | 320.1  | 361.4  | 419.7  | 0.13197304  | 312.475  | 361.85   | 49.375  | 0.863548432 | 0.1242  | 1.159  |
| 100970_at   | 1368.2 | 1617.2 | 1740.4 | 1421.1 | 1550.8 | 1386.7 | 1171.5 | 1652.9 | 0.506899982 | 1536.725 | 1440.475 | 96.25   | 1.066818237 | 0.4944  | -1.071 |
| 100971_at   | 14.8   | 7.7    | 9.3    | 10.6   | 7.7    | 21.9   | 10.2   | 9.7    | 0.642773255 | 10.6     | 12.375   | 1.775   | 0.856565657 | 0.723   | 1.104  |
| 100972_s_at | 388.8  | 274.1  | 184.2  | 240.9  | 311.7  | 292.1  | 201.5  | 217.6  | 0.762258605 | 272      | 255.725  | 16.275  | 1.063642585 | 0.8299  | -1.043 |
| 100973_i_at | 199    | 182.4  | 125.6  | 242.9  | 246.3  | 292.7  | 233.6  | 252    | 0.059001246 | 187.475  | 256.15   | 68.675  | 0.731895374 | 0.06145 | 1.399  |
| 100974_at   | 407.6  | 465.1  | 579.1  | 583.9  | 400.1  | 506.6  | 379.2  | 406.8  | 0.158076265 | 508.925  | 423.175  | 85.75   | 1.202634844 | 0.1495  | -1.197 |
| 100975_f_at | 23.3   | 27.1   | 20.5   | 24.5   | 23.2   | 33.7   | 16     | 26.5   | 0.811894936 | 23.85    | 24.85    | 1       | 0.959758551 | 0.9549  | 1.01   |
| 100976_at   | 1589.9 | 1229.2 | 1549.1 | 1596   | 1286.8 | 1279.3 | 1360   | 1461.1 | 0.208106814 | 1491.05  | 1346.8   | 144.25  | 1.107105732 | 0.2131  | -1.102 |
| 100977_at   | 851.5  | 860.1  | 818.8  | 884.7  | 791.2  | 862.1  | 823.2  | 673.1  | 0.203824381 | 853.775  | 787.4    | 66.375  | 1.084296419 | 0.1817  | -1.088 |
| 100978_at   | 494.3  | 747.4  | 757.6  | 540    | 737.6  | 551.2  | 409.9  | 640.5  | 0.627094978 | 634.825  | 584.8    | 50.025  | 1.085542066 | 0.6216  | -1.091 |
| 100979_at   | 933    | 1055.5 | 1278.3 | 1572.9 | 1389.2 | 983.3  | 1289.4 | 1501.3 | 0.668487559 | 1209.925 | 1290.8   | 80.875  | 0.937345057 | 0.6396  | 1.075  |
| 100980_at   | 286.5  | 248.2  | 331.3  | 380.2  | 213    | 276.4  | 310.1  | 368.1  | 0.665123917 | 311.55   | 291.9    | 19.65   | 1.067317575 | 0.6426  | -1.074 |
| 100981_at   | 5.6    | 5.1    | 7.2    | 5.6    | 26.5   | 8      | 4.2    | 8.3    | 0.325557869 | 5.875    | 11.75    | 5.875   | 0.5         | 0.2762  | 1.596  |
| 100982_at   | 181.4  | 148    | 193.2  | 222.1  | 120.1  | 169.8  | 104.3  | 133.9  | 0.040386383 | 186.175  | 132.025  | 54.15   | 1.410149593 | 0.03933 | -1.418 |
| 100983_at   | 152.4  | 173.7  | 249.3  | 242.1  | 177.6  | 226.6  | 192.2  | 228.5  | 0.94905827  | 204.375  | 206.225  | 1.85    | 0.991029216 | 0.8596  | -1.026 |
| 100984_at   | 1075.1 | 1052.5 | 1421.7 | 1382.7 | 1150   | 948.5  | 946.5  | 1111.5 | 0.14784037  | 1233     | 1039.125 | 193.875 | 1.186575244 | 0.1327  | -1.18  |
| 100985_at   | 438.2  | 390.1  | 452    | 693.7  | 415.3  | 521.4  | 480.3  | 466.2  | 0.768280089 | 493.5    | 470.8    | 22.7    | 1.048215803 | 0.8579  | -1.025 |
| 100986_at   | 1927.2 | 1785.4 | 1708.7 | 1560   | 1460   | 1650.1 | 1449.6 | 1317.2 | 0.036619409 | 1745.325 | 1469.225 | 276.1   | 1.187922204 | 0.03545 | -1.188 |
| 100987_f_at | 659.7  | 425.2  | 465.1  | 447.9  | 463.5  | 594.8  | 451.9  | 374.9  | 0.704244823 | 499.475  | 471.275  | 28.2    | 1.059837674 | 0.6983  | -1.058 |
| 100988_at   | 519.7  | 430.7  | 452.9  | 437.3  | 495.1  | 432.9  | 385.9  | 511.7  | 0.919546138 | 460.15   | 456.4    | 3.75    | 1.008216477 | 0.8863  | -1.012 |
| 100989_at   | 417.1  | 330.2  | 246.7  | 334.5  | 253.5  | 417.8  | 349.4  | 313.8  | 0.976515881 | 332.125  | 333.625  | 1.5     | 0.995503934 | 0.9724  | 1.005  |
| 100990_g_at | 514.1  | 570.5  | 452.9  | 411.4  | 501.4  | 434    | 420.2  | 466.3  | 0.45944283  | 487.225  | 455.475  | 31.75   | 1.069707448 | 0.4764  | -1.064 |
| 100991_at   | 317.7  | 168.3  | 175.9  | 162.3  | 205.9  | 370.7  | 219.8  | 160.9  | 0.593322389 | 206.05   | 239.325  | 33.275  | 0.860963125 | 0.5691  | 1.153  |
| 100992_at   | 496.3  | 436.1  | 518.3  | 657    | 432.9  | 488.4  | 488.1  | 507.5  | 0.393033412 | 526.925  | 479.225  | 47.7    | 1.099535709 | 0.3906  | -1.089 |
| 100994_at   | 154.4  | 168    | 174.9  | 173.6  | 134.5  | 164.1  | 137.2  | 183.3  | 0.36044715  | 167.725  | 154.775  | 12.95   | 1.083669843 | 0.3134  | -1.091 |



|             |         |         |        |        |        |         |        |        |             |          |          |         |             |           |        |
|-------------|---------|---------|--------|--------|--------|---------|--------|--------|-------------|----------|----------|---------|-------------|-----------|--------|
| 100995_at   | 29.7    | 19.9    | 2.1    | 15.5   | 11.7   | 33.8    | 14.8   | 26.2   | 0.553335794 | 16.8     | 21.625   | 4.825   | 0.776878613 | 0.4475    | 1.68   |
| 100996_at   | 5       | 19.8    | 39     | 28.1   | 28.7   | 7.4     | 15.1   | 35.4   | 0.894567879 | 22.975   | 21.65    | 1.325   | 1.061200924 | 0.9821    | 1.013  |
| 100997_at   | 152.9   | 105.3   | 101.3  | 91.1   | 102.6  | 170.3   | 186.3  | 118.4  | 0.246063125 | 112.65   | 144.4    | 31.75   | 0.780124654 | 0.2376    | 1.269  |
| 100998_at   | 29.2    | 124.7   | 98.2   | 94.4   | 307.8  | 270.6   | 251.4  | 211.9  | 0.000881396 | 86.625   | 260.425  | 173.8   | 0.332629356 | 0.01077   | 3.386  |
| 101000_at   | 729.1   | 779.1   | 1157.8 | 1097.6 | 787.9  | 789     | 941.4  | 889.5  | 0.487193408 | 940.9    | 851.95   | 88.95   | 1.104407536 | 0.5395    | -1.085 |
| 101001_at   | 1229.3  | 1567.3  | 1516   | 1737.7 | 1865.2 | 1212    | 2153.8 | 1885.3 | 0.296856457 | 1512.575 | 1779.075 | 266.5   | 0.850203055 | 0.3451    | 1.16   |
| 101002_at   | 1686.5  | 1567.2  | 1973.4 | 1556.5 | 1626.5 | 1857.6  | 2316.6 | 1380.2 | 0.675495379 | 1695.9   | 1795.225 | 99.325  | 0.944672673 | 0.7351    | 1.044  |
| 101003_at   | 367.3   | 461.1   | 372.3  | 385.5  | 407.4  | 458.3   | 476.5  | 342.6  | 0.533559555 | 396.55   | 421.2    | 24.65   | 0.941476733 | 0.5567    | 1.058  |
| 101004_f_at | 1629.5  | 2437.2  | 2178.2 | 2143.2 | 2525.1 | 1967    | 3029.6 | 2420.8 | 0.211619216 | 2097.025 | 2485.625 | 388.6   | 0.843661051 | 0.2195    | 1.184  |
| 101006_at   | 71.4    | 131.2   | 177.7  | 139.7  | 117.9  | 63.8    | 133.5  | 124.3  | 0.487313563 | 130      | 109.875  | 20.125  | 1.183162685 | 0.5683    | -1.169 |
| 101007_at   | 559     | 507.1   | 768.9  | 728.4  | 656    | 683.7   | 524.2  | 526.2  | 0.594028714 | 640.85   | 597.525  | 43.325  | 1.072507426 | 0.6307    | -1.064 |
| 101008_at   | 265.3   | 239     | 350    | 554.2  | 337.8  | 254.4   | 428.4  | 497.9  | 0.768525322 | 352.125  | 379.625  | 27.5    | 0.927560092 | 0.6902    | 1.105  |
| 101009_at   | 433.6   | 453.6   | 399.3  | 349.3  | 1112.1 | 896.3   | 829.6  | 939.9  | 0.001363609 | 408.95   | 944.475  | 535.525 | 0.432991874 | 0.0000613 | 2.307  |
| 101010_at   | 16      | 16.9    | 14.6   | 10.1   | 12.3   | 22.8    | 21     | 11.7   | 0.472358279 | 14.4     | 16.95    | 2.55    | 0.849557522 | 0.5378    | 1.147  |
| 101011_at   | 5603.2  | 4978.3  | 4905.3 | 4476.5 | 5422.5 | 4790.7  | 4566.3 | 4810.9 | 0.763998486 | 4990.825 | 4897.6   | 93.225  | 1.019034833 | 0.7736    | 1.018  |
| 101013_at   | 10049.3 | 9597.7  | 7526.2 | 7745.1 | 7624   | 7537    | 7272.7 | 7666.4 | 0.155666193 | 8729.575 | 7525.025 | 1204.55 | 1.160072558 | 0.1078    | -1.151 |
| 101014_at   | 411.5   | 455.2   | 524.4  | 350.2  | 706.8  | 307.9   | 401.1  | 517.4  | 0.634355749 | 435.325  | 483.3    | 47.975  | 0.900734533 | 0.7414    | 1.07   |
| 101015_s_at | 215.3   | 378     | 340    | 365.4  | 423.4  | 249.2   | 333.6  | 279.8  | 0.954504979 | 324.675  | 321.5    | 3.175   | 1.009875583 | 0.9709    | 1.007  |
| 101016_at   | 10369.4 | 10370.5 | 8789.9 | 8364.1 | 8346.7 | 10268.7 | 9929   | 9115.1 | 0.934119718 | 9473.475 | 9414.875 | 58.6    | 1.006224193 | 0.9498    | 1.005  |
| 101017_at   | 1338.5  | 1366.5  | 1697.1 | 1355.9 | 2033.8 | 2511.2  | 1242.8 | 1771.4 | 0.187997301 | 1439.5   | 1889.8   | 450.3   | 0.761720817 | 0.1717    | 1.278  |
| 101019_at   | 90.6    | 153.3   | 154.4  | 155.1  | 154.9  | 166.4   | 210.7  | 179.5  | 0.0985587   | 138.35   | 177.875  | 39.525  | 0.777793394 | 0.1203    | 1.309  |
| 101020_at   | 53.2    | 71.2    | 92.9   | 96.3   | 81.6   | 118.3   | 106.4  | 101.6  | 0.115091737 | 78.4     | 101.975  | 23.575  | 0.768815886 | 0.1263    | 1.325  |
| 101022_at   | 61.2    | 33.1    | 37.3   | 42.3   | 28     | 60.3    | 27.2   | 25.4   | 0.461164387 | 43.475   | 35.225   | 8.25    | 1.234208659 | 0.341     | -1.286 |
| 101023_f_at | 931.6   | 977.9   | 938.3  | 1005.2 | 942.2  | 792.7   | 909.1  | 1047.2 | 0.507979136 | 963.25   | 922.8    | 40.45   | 1.043833984 | 0.4614    | -1.049 |
| 101024_i_at | 35.3    | 34      | 80     | 26.5   | 26.3   | 35.9    | 30.3   | 30.7   | 0.360891969 | 43.95    | 30.8     | 13.15   | 1.426948052 | 0.3262    | -1.304 |
| 101025_f_at | 164.6   | 84      | 167.4  | 109.4  | 108.2  | 184.9   | 138.5  | 133.7  | 0.716578696 | 131.35   | 141.325  | 9.975   | 0.929418008 | 0.6517    | 1.1    |
| 101026_at   | 20.5    | 25.9    | 17.5   | 19.3   | 19     | 26.6    | 22     | 18.6   | 0.781434595 | 20.8     | 21.55    | 0.75    | 0.965197216 | 0.7713    | 1.036  |
| 101027_s_at | 2265.3  | 2331.2  | 1540.5 | 1423.9 | 2553.5 | 1978    | 1549   | 1557.5 | 0.956009951 | 1890.225 | 1909.5   | 19.275  | 0.989905734 | 0.9445    | 1.013  |
| 101028_i_at | 55.7    | 63.3    | 124.3  | 83     | 99.7   | 57.8    | 73.4   | 93.2   | 0.97691299  | 81.575   | 81.025   | 0.55    | 1.006788028 | 0.9278    | 1.021  |
| 101029_f_at | 1029.5  | 951.2   | 1142.1 | 1106.4 | 848.9  | 1121.8  | 1127.9 | 1016.7 | 0.728859572 | 1057.3   | 1028.825 | 28.475  | 1.027677205 | 0.7018    | -1.032 |
| 101030_at   | 1354.8  | 1637    | 3165.1 | 3348.7 | 2044.5 | 1143.1  | 2022.6 | 1992.5 | 0.359606705 | 2376.4   | 1800.675 | 575.725 | 1.319727324 | 0.4296    | -1.257 |
| 101031_at   | 657.4   | 735.3   | 607.1  | 540    | 731.9  | 689.7   | 587    | 607    | 0.73591315  | 634.95   | 653.9    | 18.95   | 0.971020034 | 0.7172    | 1.032  |
| 101033_at   | 25.8    | 15.6    | 28.6   | 52.5   | 34     | 30.9    | 67.6   | 82.2   | 0.18121737  | 30.625   | 53.675   | 23.05   | 0.570563577 | 0.1557    | 1.762  |
| 101034_at   | 388.9   | 292     | 581.1  | 344.7  | 386.1  | 376.1   | 286.7  | 282    | 0.372104537 | 401.675  | 332.725  | 68.95   | 1.207228191 | 0.3667    | -1.18  |
| 101035_at   | 1002    | 996.2   | 1132   | 1093.8 | 1086.4 | 985.7   | 1119.5 | 1138.3 | 0.600636503 | 1056     | 1082.475 | 26.475  | 0.97554216  | 0.6051    | 1.025  |
| 101036_at   | 316.8   | 376.9   | 323.1  | 295.6  | 341.3  | 417.5   | 312.7  | 361.2  | 0.327849342 | 328.1    | 358.175  | 30.075  | 0.916032666 | 0.3195    | 1.09   |
| 101037_at   | 54.2    | 80.5    | 53.3   | 103.5  | 22.9   | 66.2    | 81.1   | 20.9   | 0.245924466 | 72.875   | 47.775   | 25.1    | 1.525379383 | 0.1987    | -1.75  |
| 101039_at   | 1935.2  | 1738.2  | 2675.1 | 3181.2 | 1420.7 | 1603.1  | 2309.6 | 2417.9 | 0.330491813 | 2382.425 | 1937.825 | 444.6   | 1.229432482 | 0.3331    | -1.225 |
| 101040_at   | 477     | 333.9   | 399.5  | 450.2  | 340.7  | 384.6   | 531.3  | 502.2  | 0.675937134 | 415.15   | 439.7    | 24.55   | 0.944166477 | 0.7193    | 1.051  |
| 101041_at   | 15.3    | 12.7    | 6.8    | 8.4    | 8      | 14.6    | 13.1   | 13.3   | 0.574660509 | 10.8     | 12.25    | 1.45    | 0.881632653 | 0.5317    | 1.166  |
| 101042_f_at | 543     | 554.3   | 516.5  | 515    | 726.2  | 669.3   | 557.5  | 627.4  | 0.045596832 | 532.2    | 645.1    | 112.9   | 0.824988374 | 0.01842   | 1.207  |
| 101043_f_at | 65.8    | 42.8    | 48.1   | 41.7   | 62.8   | 73.7    | 45.3   | 39.9   | 0.56837427  | 49.6     | 55.425   | 5.825   | 0.894903022 | 0.5987    | 1.103  |
| 101044_at   | 1329.4  | 1202.9  | 1355.3 | 1691.5 | 1298.4 | 1008.6  | 1255.8 | 1333.3 | 0.234734199 | 1394.775 | 1224.025 | 170.75  | 1.139498785 | 0.2295    | -1.137 |
| 101045_at   | 2025.9  | 2344.3  | 1692.2 | 1414.8 | 2478.6 | 2113.2  | 1787.4 | 1652.8 | 0.629892994 | 1869.3   | 2008     | 138.7   | 0.930926295 | 0.607     | 1.08   |
| 101046_at   | 109.7   | 87.2    | 45.5   | 60.6   | 37     | 86.1    | 56.1   | 86     | 0.630795868 | 75.75    | 66.3     | 9.45    | 1.142533937 | 0.6478    | -1.144 |
| 101047_at   | 2887.7  | 3483.3  | 2954.5 | 2164   | 2169.2 | 2988.5  | 1950.2 | 1962.2 | 0.149763352 | 2872.375 | 2267.525 | 604.85  | 1.266744578 | 0.1419    | -1.269 |
| 101048_at   | 7.3     | 22.6    | 25.8   | 17.9   | 23     | 30.6    | 39.5   | 26     | 0.080820936 | 18.4     | 29.775   | 11.375  | 0.617968094 | 0.1162    | 1.753  |
| 101049_at   | 264.6   | 167.4   | 181.7  | 168    | 176.3  | 287.5   | 129.4  | 207.5  | 0.911087794 | 195.425  | 200.175  | 4.75    | 0.976270763 | 0.9934    | 1.002  |
| 101050_at   | 385.6   | 325.8   | 627.7  | 632.7  | 357.7  | 685     | 556.5  | 573.3  | 0.650639107 | 492.95   | 543.125  | 50.175  | 0.907617952 | 0.6261    | 1.119  |
| 101051_at   | 145.6   | 127.8   | 112.3  | 95.5   | 147.7  | 108.5   | 95.4   | 121.4  | 0.89888086  | 120.3    | 118.25   | 2.05    | 1.017336152 | 0.8931    | -1.018 |
| 101052_g_at | 31.4    | 50      | 28.7   | 22.4   | 45.9   | 28.9    | 14.3   | 27.3   | 0.663213016 | 33.125   | 29.1     | 4.025   | 1.138316151 | 0.5896    | -1.182 |
| 101053_at   | 2184.6  | 2134.9  | 2071.9 | 1751.2 | 2545.8 | 2221    | 2023   | 1945.2 | 0.40893789  | 2035.65  | 2183.75  | 148.1   | 0.932180882 | 0.4143    | 1.071  |
| 101054_at   | 232.8   | 236     | 235.7  | 193.6  | 448.7  | 337.2   | 320.3  | 309.3  | 0.022385886 | 224.525  | 353.875  | 129.35  | 0.63447545  | 0.003776  | 1.564  |
| 101055_at   | 1129.6  | 963.7   | 988.4  | 851.8  | 1201.6 | 970.4   | 1039.7 | 1019.6 | 0.365395653 | 983.375  | 1057.825 | 74.45   | 0.929619739 | 0.3503    | 1.078  |
| 101056_at   | 2624.6  | 2942.4  | 2514   | 2798.6 | 2965.8 | 3036.9  | 2739.6 | 2798.5 | 0.212918538 | 2719.9   | 2885.2   | 165.3   | 0.942707611 | 0.206     | 1.062  |
| 101057_at   | 965.6   | 894.2   | 736.4  | 608.7  | 748.4  | 722.1   | 530.3  | 600.5  | 0.172263033 | 801.225  | 650.325  | 150.9   | 1.232037827 | 0.1736    | -1.225 |



|             |        |        |        |        |        |        |        |        |             |          |          |          |             |         |        |
|-------------|--------|--------|--------|--------|--------|--------|--------|--------|-------------|----------|----------|----------|-------------|---------|--------|
| 101058_at   | 19.6   | 39.5   | 9.9    | 17.5   | 30.5   | 21.2   | 15.8   | 18.2   | 0.978701197 | 21.625   | 21.425   | 0.2      | 1.009334889 | 0.8045  | 1.085  |
| 101059_at   | 3031   | 3850.2 | 3374.5 | 2829.4 | 4797.3 | 3579.1 | 3881.8 | 3422.3 | 0.143416396 | 3271.275 | 3920.125 | 648.85   | 0.834482319 | 0.1253  | 1.196  |
| 101060_at   | 1994.6 | 2640.2 | 2329.8 | 2675.8 | 2993.2 | 2538.4 | 2827.1 | 3643.2 | 0.088163216 | 2410.1   | 3000.475 | 590.375  | 0.803239487 | 0.07737 | 1.243  |
| 101061_at   | 2002.7 | 1946.4 | 1636.6 | 1592.4 | 2064.4 | 1830.5 | 2055.9 | 1818   | 0.289649589 | 1794.525 | 1942.2   | 147.675  | 0.923965091 | 0.2737  | 1.086  |
| 101062_at   | 257.8  | 241.3  | 269.4  | 254.1  | 278.3  | 326    | 250.3  | 265.9  | 0.235248805 | 255.65   | 280.125  | 24.475   | 0.912628291 | 0.2019  | 1.091  |
| 101063_at   | 161.1  | 163    | 120.5  | 135.6  | 129.1  | 100.9  | 107.7  | 64.5   | 0.041602057 | 145.05   | 100.55   | 44.5     | 1.442565888 | 0.05538 | -1.476 |
| 101064_at   | 1458.5 | 1417.5 | 1408.2 | 1210.7 | 1723.3 | 1583.7 | 1383.1 | 1334.6 | 0.266619904 | 1373.725 | 1506.175 | 132.45   | 0.912062011 | 0.2657  | 1.093  |
| 101065_at   | 3541   | 4505   | 4185.7 | 4016.6 | 4392.7 | 3911.9 | 4130.9 | 3785.8 | 0.978710133 | 4062.075 | 4055.325 | 6.75     | 1.001664478 | 0.9937  | 1      |
| 101067_at   | 1760.2 | 2293.3 | 1589.3 | 1819.8 | 2201.9 | 1893.1 | 1709.3 | 1662.6 | 0.995767324 | 1865.65  | 1866.725 | 1.075    | 0.999424125 | 0.9722  | 1.004  |
| 101068_at   | 182.5  | 146.4  | 126.1  | 122.7  | 101.3  | 189.8  | 112.1  | 135.3  | 0.699091676 | 144.425  | 134.625  | 9.8      | 1.0727948   | 0.6168  | -1.091 |
| 101069_g_at | 1762.4 | 1936.3 | 1648.1 | 1569.9 | 1423.1 | 1775.2 | 1599.7 | 1466.7 | 0.19658439  | 1729.175 | 1566.175 | 163      | 1.104075215 | 0.1891  | -1.105 |
| 101070_at   | 353.1  | 407.5  | 534    | 568.8  | 516.6  | 456.2  | 669.9  | 621    | 0.205792759 | 465.85   | 565.925  | 100.075  | 0.823165614 | 0.2059  | 1.224  |
| 101071_at   | 85.7   | 130.1  | 99.2   | 127.3  | 220.9  | 97.3   | 113.6  | 158.3  | 0.282938279 | 110.575  | 147.525  | 36.95    | 0.749533977 | 0.2714  | 1.287  |
| 101072_at   | 987.4  | 961.5  | 1252.9 | 1222.5 | 1007.6 | 945.3  | 1000.1 | 1058.5 | 0.274045313 | 1106.075 | 1002.875 | 103.2    | 1.102904151 | 0.2577  | -1.096 |
| 101073_at   | 1005   | 898.4  | 1094.4 | 1525.3 | 1051.4 | 941.8  | 1305.7 | 1578.4 | 0.669756772 | 1130.775 | 1219.325 | 88.55    | 0.927377853 | 0.6562  | 1.079  |
| 101074_at   | 951    | 893.6  | 869.1  | 662.9  | 775.3  | 827.5  | 764.5  | 762.8  | 0.403909503 | 844.15   | 782.525  | 61.625   | 1.078751478 | 0.4434  | -1.07  |
| 101075_f_at | 9.7    | 12.9   | 4.8    | 32.5   | 19.8   | 12.8   | 36.4   | 27.7   | 0.290942216 | 14.975   | 24.175   | 9.2      | 0.619441572 | 0.2098  | 1.897  |
| 101076_r_at | 77     | 23.1   | 21     | 45.5   | 37.8   | 57.8   | 47.6   | 44.8   | 0.717496485 | 41.65    | 47       | 5.35     | 0.886170213 | 0.4587  | 1.286  |
| 101077_at   | 38.3   | 110.2  | 48.3   | 67.7   | 61.8   | 71.7   | 19.6   | 72.2   | 0.645974053 | 66.125   | 56.325   | 9.8      | 1.173990235 | 0.6313  | -1.217 |
| 101078_at   | 5229.6 | 5437.7 | 3811.2 | 3819.6 | 4382.8 | 4419.8 | 4138.2 | 4260.2 | 0.579607195 | 4574.525 | 4300.25  | 274.275  | 1.063781176 | 0.6412  | -1.049 |
| 101079_at   | 672.4  | 664    | 684.7  | 732.1  | 814.1  | 702.2  | 705.7  | 797.7  | 0.108495329 | 688.3    | 754.925  | 66.625   | 0.9117462   | 0.08949 | 1.095  |
| 101080_at   | 389.5  | 449.7  | 590.5  | 899.4  | 373    | 399.5  | 705.7  | 649.3  | 0.735817926 | 582.275  | 531.875  | 50.4     | 1.094759107 | 0.7641  | -1.08  |
| 101081_at   | 1594.7 | 1907.4 | 2144.1 | 2582.9 | 1838.2 | 1671.3 | 2060   | 2216   | 0.664674149 | 2057.275 | 1946.375 | 110.9    | 1.056977715 | 0.7131  | -1.047 |
| 101082_at   | 3045.6 | 3449.9 | 4001.8 | 4810.9 | 3487.6 | 3373.6 | 4413.1 | 4163.4 | 0.946355957 | 3827.05  | 3859.425 | 32.375   | 0.991611445 | 0.8932  | 1.017  |
| 101083_s_at | 1010.3 | 757.8  | 896.3  | 853.8  | 741.3  | 612.3  | 503    | 686.9  | 0.016084966 | 879.55   | 635.875  | 243.675  | 1.383212109 | 0.0188  | -1.39  |
| 101084_f_at | 2628.7 | 3060.1 | 2026.4 | 1651.1 | 3279.5 | 2206.2 | 2167   | 2118   | 0.817704159 | 2341.575 | 2442.675 | 101.1    | 0.958610949 | 0.7706  | 1.054  |
| 101085_at   | 1242.8 | 1704.3 | 1230   | 991.7  | 1461.3 | 1092.1 | 963.9  | 884.8  | 0.367149091 | 1292.2   | 1100.525 | 191.675  | 1.174166875 | 0.3449  | -1.174 |
| 101086_f_at | 7110.8 | 6461.3 | 5073.2 | 5253.7 | 5142.5 | 5485.2 | 5718.7 | 5998.3 | 0.498956168 | 5974.75  | 5586.175 | 388.575  | 1.069560119 | 0.5264  | -1.061 |
| 101087_r_at | 40.3   | 26.6   | 7.3    | 16     | 11.3   | 14.2   | 31.3   | 19     | 0.684960358 | 22.55    | 18.95    | 3.6      | 1.189973615 | 0.8747  | -1.073 |
| 101088_f_at | 4511.7 | 4268.2 | 4831.7 | 4743.6 | 4025.3 | 4203   | 4531.4 | 3697.1 | 0.073840465 | 4588.8   | 4114.2   | 474.6    | 1.11535657  | 0.07208 | -1.117 |
| 101089_at   | 1683.4 | 2012.7 | 2137.4 | 2593   | 2393.9 | 1955.4 | 2840.6 | 2667   | 0.23295011  | 2106.625 | 2464.225 | 357.6    | 0.854883381 | 0.2369  | 1.172  |
| 101090_at   | 1533.5 | 1732.9 | 1776   | 2160.6 | 1606.9 | 1714.8 | 2633.5 | 2480.5 | 0.346264018 | 1800.75  | 2108.925 | 308.175  | 0.853871048 | 0.3637  | 1.153  |
| 101091_at   | 4322.2 | 4544.5 | 4379.2 | 4122.6 | 4151   | 3749.8 | 4450.2 | 4060.5 | 0.215443448 | 4342.125 | 4102.875 | 239.25   | 1.058312768 | 0.2035  | -1.06  |
| 101093_at   | 3129.1 | 3055.4 | 3519.8 | 4570   | 2909.6 | 2357.6 | 3649.1 | 4069.5 | 0.556177723 | 3568.575 | 3246.45  | 322.125  | 1.099223767 | 0.5248  | -1.108 |
| 101094_at   | 250.5  | 291.7  | 341.6  | 367.2  | 378.8  | 371.4  | 294    | 345.7  | 0.327290786 | 312.75   | 347.475  | 34.725   | 0.900064753 | 0.3215  | 1.118  |
| 101095_at   | 5155.3 | 5825.3 | 5574.6 | 4644.8 | 5356.8 | 5735.7 | 6049.6 | 6346.8 | 0.139836362 | 5300     | 5872.225 | 572.225  | 0.902553972 | 0.1416  | 1.11   |
| 101096_s_at | 854.1  | 956.9  | 807    | 801.9  | 837.6  | 783.2  | 808.8  | 730    | 0.186169665 | 854.975  | 789.9    | 65.075   | 1.082383846 | 0.1724  | -1.081 |
| 101097_at   | 862.1  | 1268.5 | 968.7  | 904.7  | 1236.8 | 961.1  | 997.9  | 974.5  | 0.725980335 | 1001     | 1042.575 | 41.575   | 0.960122773 | 0.6699  | 1.048  |
| 101099_at   | 24.6   | 28.2   | 42.6   | 14.7   | 42.5   | 29.3   | 48.3   | 51.5   | 0.090037016 | 27.525   | 42.9     | 15.375   | 0.641608392 | 0.09953 | 1.636  |
| 101101_at   | 1397.2 | 1345.8 | 1814.7 | 1822.8 | 1572.7 | 1482.6 | 1673.7 | 1769.7 | 0.846398357 | 1595.125 | 1624.675 | 29.55    | 0.981811747 | 0.7822  | 1.026  |
| 101102_at   | 942.3  | 1075.8 | 930.4  | 778.1  | 835.1  | 1036.2 | 789.7  | 899.2  | 0.626768349 | 931.65   | 890.05   | 41.6     | 1.046738947 | 0.6346  | -1.045 |
| 101103_at   | 49.9   | 24.9   | 35.3   | 53.7   | 9.9    | 20.1   | 37.1   | 37.9   | 0.174078804 | 40.95    | 26.25    | 14.7     | 1.56        | 0.1916  | -1.704 |
| 101104_at   | 899.4  | 816.5  | 851.3  | 722.3  | 890.6  | 864.6  | 845.6  | 808.3  | 0.506630657 | 822.375  | 852.275  | 29.9     | 0.964917427 | 0.4802  | 1.039  |
| 101105_at   | 5013.2 | 5200.3 | 4498.8 | 4491.7 | 4656.8 | 4748.5 | 4638.7 | 4614.5 | 0.507670033 | 4801     | 4664.625 | 136.375  | 1.029236005 | 0.5075  | -1.027 |
| 101106_at   | 1692.1 | 1661.3 | 2172.5 | 1991.7 | 1652.5 | 1347.2 | 2006.9 | 1719.1 | 0.320804174 | 1879.4   | 1681.425 | 197.975  | 1.117742391 | 0.3139  | -1.122 |
| 101107_at   | 3683.5 | 3699.3 | 3091.3 | 2740.1 | 3754.9 | 3541.8 | 3326.2 | 3310.3 | 0.522218418 | 3303.55  | 3483.3   | 179.75   | 0.948396635 | 0.4785  | 1.061  |
| 101108_at   | 472.7  | 461.2  | 631.9  | 595.2  | 492.7  | 499.2  | 645.1  | 453.2  | 0.778670314 | 540.25   | 522.55   | 17.7     | 1.033872357 | 0.7766  | -1.033 |
| 101109_at   | 2441.1 | 2269.7 | 3188.9 | 3845.5 | 2273.1 | 2058   | 2795   | 2841.2 | 0.33343484  | 2936.3   | 2491.825 | 444.475  | 1.178373281 | 0.3388  | -1.163 |
| 101110_at   | 2462.5 | 2309.2 | 3028.3 | 4289.1 | 2343.3 | 2719.2 | 6311.7 | 5034.6 | 0.357447491 | 3022.275 | 4102.2   | 1079.925 | 0.736744917 | 0.3966  | 1.287  |
| 101111_at   | 142.4  | 147.8  | 126.4  | 138    | 121.4  | 140.4  | 131.9  | 135.1  | 0.328725121 | 138.65   | 132.2    | 6.45     | 1.048789713 | 0.3377  | -1.048 |
| 101112_g_at | 2002.4 | 2045.6 | 2167.5 | 2236.3 | 1852   | 2286.3 | 2785.2 | 2236.4 | 0.430857751 | 2112.95  | 2289.975 | 177.025  | 0.922695663 | 0.4469  | 1.074  |
| 101113_at   | 1791.2 | 1632.6 | 1756.2 | 1321.4 | 1710.8 | 1410.2 | 1429.4 | 1282.8 | 0.278632045 | 1625.35  | 1458.3   | 167.05   | 1.11455119  | 0.2886  | -1.113 |
| 101114_at   | 65.9   | 63.4   | 81.1   | 100.3  | 17.5   | 65.4   | 84.4   | 37     | 0.183147431 | 77.675   | 51.075   | 26.6     | 1.520802741 | 0.1733  | -1.756 |
| 101115_at   | 53     | 112.3  | 94.1   | 36.4   | 119.5  | 53.2   | 15.8   | 38.6   | 0.568692211 | 73.95    | 56.775   | 17.175   | 1.302509908 | 0.4319  | -1.513 |
| 101116_at   | 3.1    | 5.2    | 3.2    | 3.7    | 2.1    | 6      | 5      | 3.8    | 0.679979932 | 3.8      | 4.225    | 0.425    | 0.899408284 | 0.8195  | 1.063  |
| 101117_at   | 7.1    | 5.4    | 3      | 8.7    | 4.1    | 8.3    | 4.5    | 11     | 0.668249548 | 6.05     | 6.975    | 0.925    | 0.867383513 | 0.7042  | 1.141  |



|             |         |         |         |         |         |         |         |         |             |           |           |        |             |          |        |
|-------------|---------|---------|---------|---------|---------|---------|---------|---------|-------------|-----------|-----------|--------|-------------|----------|--------|
| 101118_at   | 27.5    | 12      | 12.8    | 26      | 15.7    | 26.1    | 24.4    | 15.6    | 0.867842522 | 19.575    | 20.45     | 0.875  | 0.957212714 | 0.7531   | 1.09   |
| 101119_at   | 18.4    | 29.6    | 17.6    | 22.2    | 10.6    | 24.7    | 14      | 29      | 0.663129942 | 21.95     | 19.575    | 2.375  | 1.121328225 | 0.5337   | -1.19  |
| 101120_at   | 37.9    | 14.7    | 15.5    | 43.3    | 14.1    | 48.5    | 12.9    | 23.9    | 0.796451224 | 27.85     | 24.85     | 3      | 1.120724346 | 0.7422   | -1.155 |
| 101121_at   | 5       | 18.9    | 2.6     | 6.2     | 3.1     | 20.1    | 7.5     | 2.9     | 0.96840853  | 8.175     | 8.4       | 0.225  | 0.973214286 | 0.9639   | -1.029 |
| 101122_at   | 61.3    | 5       | 30      | 37.6    | 53.7    | 45.4    | 46.5    | 53      | 0.258399808 | 33.475    | 49.65     | 16.175 | 0.674219537 | 0.2407   | 2.042  |
| 101123_at   | 4520.4  | 5404.9  | 4676.1  | 4648.9  | 5507.3  | 5012.2  | 5261.4  | 5530.4  | 0.079810978 | 4812.575  | 5327.825  | 515.25 | 0.903290742 | 0.06707  | 1.109  |
| 101124_at   | 63.1    | 20.5    | 6       | 62.8    | 28.5    | 56.6    | 9.5     | 18.5    | 0.604299424 | 38.1      | 28.275    | 9.825  | 1.347480106 | 0.8441   | -1.148 |
| 101125_at   | 3       | 1.6     | 1.7     | 1.9     | 1       | 2.7     | 3.3     | 2.3     | 0.656969675 | 2.05      | 2.325     | 0.275  | 0.88172043  | 0.8538   | 1.061  |
| 101126_r_at | 4.6     | 7.7     | 13.7    | 7.1     | 11.7    | 13.9    | 0.9     | 10.7    | 0.778742986 | 8.275     | 9.3       | 1.025  | 0.889784946 | 0.7821   | -1.22  |
| 101127_at   | 16.3    | 27      | 12.2    | 31.2    | 16.3    | 25.6    | 16.8    | 22.2    | 0.784104124 | 21.675    | 20.225    | 1.45   | 1.071693449 | 0.9385   | -1.02  |
| 101128_at   | 251.2   | 236     | 164.4   | 109.2   | 158.1   | 149.8   | 161.8   | 120     | 0.289532873 | 190.2     | 147.425   | 42.775 | 1.290147533 | 0.3426   | -1.234 |
| 101129_at   | 15278   | 15655.9 | 11369   | 12805.4 | 13810.4 | 13415.5 | 15008.3 | 13961.5 | 0.814220744 | 13777.075 | 14048.925 | 271.85 | 0.980649765 | 0.7441   | 1.028  |
| 101130_at   | 5954.1  | 7465.9  | 7294.7  | 11002.1 | 6680.9  | 5818    | 10190.3 | 9647.2  | 0.922455595 | 7929.2    | 8084.1    | 154.9  | 0.980838931 | 0.9302   | 1.017  |
| 101131_at   | 43.2    | 98.5    | 117.8   | 175.2   | 105.4   | 210.4   | 166.7   | 152     | 0.203484857 | 108.675   | 158.625   | 49.95  | 0.685106383 | 0.2068   | 1.59   |
| 101132_at   | 23.2    | 9       | 12.4    | 8.5     | 15.3    | 23.6    | 32.1    | 25.1    | 0.068806717 | 13.275    | 24.025    | 10.75  | 0.552549428 | 0.05867  | 1.907  |
| 101133_at   | 9.6     | 8.5     | 10.7    | 10.9    | 12.2    | 13.2    | 8.5     | 6.4     | 0.933536611 | 9.925     | 10.075    | 0.15   | 0.985111663 | 0.8973   | -1.024 |
| 101134_at   | 28.7    | 3       | 3.7     | 11.4    | 4.6     | 8.6     | 14.7    | 14.6    | 0.876025942 | 11.7      | 10.625    | 1.075  | 1.101176471 | 0.726    | 1.244  |
| 101135_at   | 4.8     | 1       | 2.1     | 5.1     | 3.5     | 4.9     | 8       | 28.1    | 0.264314173 | 3.25      | 11.125    | 7.875  | 0.292134831 | 0.1183   | 2.936  |
| 101136_at   | 35      | 27.3    | 12.9    | 43.8    | 9       | 37.9    | 10.4    | 14.5    | 0.256395114 | 29.75     | 17.95     | 11.8   | 1.657381616 | 0.2104   | -1.799 |
| 101137_at   | 15691.1 | 16927.5 | 10830.2 | 12067.2 | 13422.2 | 12651.9 | 13938.5 | 13550.4 | 0.760736513 | 13879     | 13390.75  | 488.25 | 1.036461737 | 0.8604   | -1.02  |
| 101138_at   | 27.9    | 47.7    | 62.5    | 97      | 66.8    | 128.6   | 76.5    | 99.9    | 0.139357329 | 58.775    | 92.95     | 34.175 | 0.632329209 | 0.1301   | 1.689  |
| 101139_r_at | 25.3    | 4.7     | 10.8    | 18.9    | 4.6     | 33.8    | 20      | 18.5    | 0.588039753 | 14.925    | 19.225    | 4.3    | 0.7763329   | 0.7186   | 1.238  |
| 101140_at   | 87.6    | 25.4    | 12.7    | 52.3    | 86.2    | 74.2    | 58.7    | 41.7    | 0.331286673 | 44.5      | 65.2      | 20.7   | 0.682515337 | 0.2383   | 1.804  |
| 101141_at   | 50.5    | 50      | 27.2    | 18.8    | 47      | 24.2    | 33.6    | 33.6    | 0.836845524 | 36.625    | 34.6      | 2.025  | 1.058526012 | 0.9972   | 1.001  |
| 101142_at   | 30.3    | 23.3    | 35.3    | 43      | 6.7     | 21.4    | 42.8    | 30.8    | 0.427187965 | 32.975    | 25.425    | 7.55   | 1.296951819 | 0.3463   | -1.543 |
| 101143_at   | 87.5    | 75.6    | 81.2    | 84.5    | 27.6    | 127.9   | 85.8    | 80.1    | 0.934321747 | 82.2      | 80.35     | 1.85   | 1.023024269 | 0.6505   | -1.17  |
| 101144_at   | 8.3     | 8       | 16.5    | 22      | 22.1    | 32.9    | 29      | 17.7    | 0.05067562  | 13.7      | 25.425    | 11.725 | 0.538839725 | 0.05491  | 1.984  |
| 101145_at   | 101.1   | 128.1   | 108.3   | 144.8   | 78.5    | 186.7   | 38.6    | 101.4   | 0.591791941 | 120.575   | 101.3     | 19.275 | 1.190276407 | 0.3838   | -1.371 |
| 101146_at   | 155.8   | 84.2    | 95.3    | 95.9    | 52.8    | 150.4   | 61.2    | 89.5    | 0.509384514 | 107.8     | 88.475    | 19.325 | 1.218423283 | 0.384    | -1.289 |
| 101147_at   | 50      | 15.4    | 22.2    | 30.3    | 28.1    | 64.3    | 32.8    | 40.5    | 0.318774763 | 29.475    | 41.425    | 11.95  | 0.711526856 | 0.2582   | 1.468  |
| 101148_at   | 97.4    | 114.6   | 117.6   | 170     | 43.5    | 127.3   | 134.3   | 142     | 0.655630274 | 124.9     | 111.775   | 13.125 | 1.117423395 | 0.5634   | -1.206 |
| 101149_at   | 3.5     | 3.4     | 3.3     | 23.4    | 10.7    | 4.6     | 4.4     | 5.7     | 0.71682101  | 8.4       | 6.35      | 2.05   | 1.322834646 | 0.8964   | 1.074  |
| 101150_at   | 65.7    | 15.2    | 32.8    | 60.2    | 9.3     | 14.9    | 27.6    | 25.1    | 0.13110052  | 43.475    | 19.225    | 24.25  | 2.261378414 | 0.1234   | -2.131 |
| 101151_at   | 11.6    | 9.4     | 8.1     | 8.3     | 9.8     | 17.6    | 11.1    | 7.5     | 0.406984723 | 9.35      | 11.5      | 2.15   | 0.813043478 | 0.4323   | 1.18   |
| 101152_at   | 288     | 224.9   | 207.7   | 211.6   | 205.5   | 240.4   | 195.7   | 231.4   | 0.5226245   | 233.05    | 218.25    | 14.8   | 1.067812142 | 0.5273   | -1.062 |
| 101153_at   | 26.4    | 11.1    | 0.9     | 11.8    | 11      | 15.8    | 7.3     | 0.9     | 0.562036434 | 12.55     | 8.75      | 3.8    | 1.434285714 | 0.7975   | -1.295 |
| 101154_at   | 23.1    | 26.1    | 12.7    | 23.7    | 43.6    | 38.7    | 37.6    | 45.5    | 0.002247521 | 21.4      | 41.35     | 19.95  | 0.517533253 | 0.006753 | 1.997  |
| 101155_at   | 18.8    | 13.4    | 29.8    | 36.8    | 8.3     | 21.8    | 12.6    | 11.3    | 0.126590455 | 24.7      | 13.5      | 11.2   | 1.82962963  | 0.09891  | -1.811 |
| 101156_at   | 3.8     | 4.6     | 8.5     | 12      | 11.8    | 5.2     | 5.5     | 14.4    | 0.527937636 | 7.225     | 9.225     | 2      | 0.783197832 | 0.534    | 1.28   |
| 101157_at   | 240.1   | 226.5   | 191.8   | 235.4   | 195.3   | 242.3   | 183.2   | 246.8   | 0.7501747   | 223.45    | 216.9     | 6.55   | 1.030198248 | 0.7179   | 1.035  |
| 101158_at   | 88.1    | 88.4    | 89      | 101.1   | 78.6    | 117.8   | 121.6   | 108.2   | 0.226145064 | 91.65     | 106.55    | 14.9   | 0.86015955  | 0.2386   | 1.148  |
| 101159_at   | 49.9    | 12.5    | 52.4    | 53.2    | 21.9    | 70.7    | 66.4    | 33.1    | 0.71332534  | 42        | 48.025    | 6.025  | 0.874544508 | 0.7237   | 1.184  |
| 101160_at   | 30.1    | 35.5    | 14      | 14.5    | 31      | 41.1    | 6.9     | 15.8    | 0.985805644 | 23.525    | 23.7      | 0.175  | 0.992616034 | 0.8192   | -1.118 |
| 101161_at   | 94.4    | 82.4    | 87.9    | 68.4    | 71.6    | 116.3   | 117.2   | 83.3    | 0.338524252 | 83.275    | 97.1      | 13.825 | 0.857621009 | 0.3652   | 1.148  |
| 101162_at   | 14.1    | 8.7     | 10.5    | 16.3    | 24.8    | 20.4    | 8.2     | 28      | 0.165183362 | 12.4      | 20.35     | 7.95   | 0.609336609 | 0.2203   | 1.533  |
| 101163_at   | 15.7    | 6       | 6.4     | 9.9     | 7.3     | 7.6     | 6.9     | 19.5    | 0.835795643 | 9.5       | 10.325    | 0.825  | 0.920096852 | 0.8782   | 1.055  |
| 101164_at   | 8.8     | 1.9     | 2.3     | 3.1     | 1.1     | 9.4     | 8.7     | 16.1    | 0.230214838 | 4.025     | 8.825     | 4.8    | 0.456090652 | 0.3986   | 1.859  |
| 101165_at   | 612.6   | 608     | 539.5   | 630.6   | 473     | 648.1   | 583.1   | 577.7   | 0.541848288 | 597.675   | 570.475   | 27.2   | 1.047679565 | 0.5158   | -1.053 |
| 101166_at   | 35.3    | 11      | 42.3    | 43.9    | 36.4    | 19      | 20.7    | 41.4    | 0.706359102 | 33.125    | 29.375    | 3.75   | 1.127659574 | 0.8987   | -1.052 |
| 101167_at   | 41.2    | 13.6    | 4       | 35.4    | 9.5     | 68.2    | 11.5    | 45.6    | 0.56959604  | 23.55     | 33.7      | 10.15  | 0.698813056 | 0.6372   | 1.434  |
| 101168_at   | 191     | 189.8   | 223.8   | 239.1   | 101.1   | 179.9   | 450.4   | 275.3   | 0.628165254 | 210.925   | 251.675   | 40.75  | 0.838084832 | 0.911    | 1.038  |
| 101169_at   | 17.3    | 13      | 10.3    | 12.8    | 43.5    | 17      | 26.3    | 16.5    | 0.140720678 | 13.35     | 25.825    | 12.475 | 0.516940949 | 0.05635  | 1.808  |
| 101170_at   | 20.5    | 17.7    | 5.7     | 5.7     | 3.2     | 25.4    | 17.1    | 12.1    | 0.747492406 | 12.4      | 14.45     | 2.05   | 0.858131488 | 0.8814   | 1.093  |
| 101171_at   | 33.2    | 7.4     | 34.8    | 28.8    | 14.2    | 22.6    | 14.2    | 13.2    | 0.216029246 | 26.05     | 16.05     | 10     | 1.62305296  | 0.4024   | -1.421 |
| 101172_at   | 34.8    | 15.8    | 17.7    | 20      | 18.2    | 30.7    | 16.3    | 13      | 0.678970275 | 22.075    | 19.55     | 2.525  | 1.12915601  | 0.6384   | -1.133 |
| 101173_at   | 35.9    | 22      | 47.5    | 42      | 35      | 35.7    | 13.8    | 39.3    | 0.487684597 | 36.85     | 30.95     | 5.9    | 1.190630048 | 0.505    | -1.235 |



|             |         |         |         |         |         |         |         |         |             |           |           |         |             |          |        |
|-------------|---------|---------|---------|---------|---------|---------|---------|---------|-------------|-----------|-----------|---------|-------------|----------|--------|
| 101174_at   | 18.9    | 47.7    | 14.1    | 13.4    | 12.7    | 23.7    | 17.1    | 12.9    | 0.46806898  | 23.525    | 16.6      | 6.925   | 1.417168675 | 0.4999   | -1.266 |
| 101175_at   | 17.5    | 22.1    | 1.9     | 5.7     | 3.8     | 7.8     | 2.6     | 2.1     | 0.204914882 | 11.8      | 4.075     | 7.725   | 2.895705521 | 0.2469   | -2.253 |
| 101176_at   | 6.9     | 9.4     | 5       | 3.4     | 5.8     | 7.4     | 5.4     | 4.2     | 0.758080597 | 6.175     | 5.7       | 0.475   | 1.083333333 | 0.9044   | -1.032 |
| 101177_at   | 67.4    | 23.9    | 85.6    | 21.3    | 64.8    | 37.4    | 138.2   | 103.4   | 0.234531263 | 49.55     | 85.95     | 36.4    | 0.576497964 | 0.2251   | 1.852  |
| 101178_at   | 330.2   | 216.3   | 271.7   | 330.4   | 149.2   | 202.1   | 378.8   | 223.5   | 0.429515417 | 287.15    | 238.4     | 48.75   | 1.204488255 | 0.3326   | -1.259 |
| 101179_at   | 2030.9  | 2256.7  | 1553.4  | 1959.8  | 1562.7  | 1950.5  | 2045.9  | 1884    | 0.639172347 | 1950.2    | 1860.775  | 89.425  | 1.048057933 | 0.6773   | -1.044 |
| 101180_at   | 436.3   | 403.9   | 560.1   | 566.4   | 390.9   | 231.8   | 497.2   | 417.3   | 0.177702846 | 491.675   | 384.3     | 107.375 | 1.279404111 | 0.1922   | -1.313 |
| 101181_at   | 17.8    | 23.8    | 10.8    | 13.5    | 10.2    | 14.6    | 7.2     | 10.3    | 0.131320603 | 16.475    | 10.575    | 5.9     | 1.557919622 | 0.1031   | -1.539 |
| 101182_at   | 113     | 74.7    | 153.8   | 137.6   | 58.4    | 127.2   | 144.7   | 135.6   | 0.903756278 | 119.775   | 116.475   | 3.3     | 1.02833226  | 0.8551   | -1.052 |
| 101183_at   | 46.7    | 42.1    | 40.6    | 30.6    | 23.7    | 83.5    | 37.3    | 35.2    | 0.739187471 | 40        | 44.925    | 4.925   | 0.890372844 | 0.9598   | 1.015  |
| 101184_at   | 1459.3  | 1128.2  | 1605    | 1362.5  | 527.8   | 755.9   | 818.4   | 718.5   | 0.00211712  | 1388.75   | 705.15    | 683.6   | 1.969439126 | 0.001359 | -1.979 |
| 101185_at   | 227.4   | 212.8   | 150.6   | 162.1   | 118.2   | 260.4   | 155.5   | 139.9   | 0.614889896 | 188.225   | 168.5     | 19.725  | 1.117062315 | 0.5005   | -1.152 |
| 101186_at   | 66.1    | 31.9    | 18.9    | 52.2    | 46.6    | 34.5    | 48      | 68.4    | 0.597087481 | 42.275    | 49.375    | 7.1     | 0.856202532 | 0.484    | 1.261  |
| 101187_at   | 1560.2  | 1747.8  | 1330.7  | 1085.2  | 1155.6  | 1011.4  | 964.1   | 966.5   | 0.060502966 | 1430.975  | 1024.4    | 406.575 | 1.396890863 | 0.02824  | -1.379 |
| 101188_at   | 23      | 5.9     | 4.1     | 36.2    | 19.8    | 43.3    | 22.2    | 17.9    | 0.41312811  | 17.3      | 25.8      | 8.5     | 0.670542636 | 0.2554   | 2.02   |
| 101189_at   | 44.2    | 12.5    | 6       | 5.5     | 3.8     | 12.2    | 10.8    | 23.7    | 0.682278361 | 17.05     | 12.625    | 4.425   | 1.35049505  | 0.8758   | -1.105 |
| 101190_at   | 13.1    | 20.1    | 18.8    | 15.9    | 7.3     | 14.6    | 8.5     | 3       | 0.028358538 | 16.975    | 8.35      | 8.625   | 2.032934132 | 0.05028  | -2.32  |
| 101191_at   | 129.6   | 63.2    | 140.5   | 124     | 63      | 112.9   | 91.2    | 106.4   | 0.355479098 | 114.325   | 93.375    | 20.95   | 1.224364123 | 0.4526   | -1.199 |
| 101192_at   | 21.3    | 28.4    | 8.4     | 10.5    | 18.3    | 19      | 12.1    | 10.6    | 0.697271036 | 17.15     | 15        | 2.15    | 1.143333333 | 0.9004   | -1.043 |
| 101193_at   | 73.1    | 71.7    | 66.8    | 59.9    | 51.3    | 78.9    | 57.6    | 67.2    | 0.569384475 | 67.875    | 63.75     | 4.125   | 1.064705882 | 0.5076   | -1.076 |
| 101194_at   | 40.7    | 53.5    | 34.5    | 72.9    | 23.7    | 9.4     | 48      | 10.9    | 0.067838964 | 50.4      | 23        | 27.4    | 2.191304348 | 0.0578   | -2.624 |
| 101195_at   | 11      | 6.8     | 9.8     | 13.5    | 8.1     | 14.6    | 13.8    | 12.5    | 0.363616127 | 10.275    | 12.25     | 1.975   | 0.83877551  | 0.3961   | 1.197  |
| 101196_at   | 324.2   | 300.4   | 434.5   | 420.9   | 374.3   | 455.6   | 615.5   | 580.8   | 0.09149684  | 370       | 506.55    | 136.55  | 0.730431349 | 0.08201  | 1.36   |
| 101197_at   | 9       | 9.2     | 3.6     | 4.4     | 2.6     | 9.4     | 4.8     | 5.7     | 0.667734691 | 6.55      | 5.625     | 0.925   | 1.164444444 | 0.6566   | -1.181 |
| 101198_at   | 94.7    | 95.8    | 63.5    | 70.4    | 83.6    | 116     | 72.3    | 78.9    | 0.624263399 | 81.1      | 87.7      | 6.6     | 0.924743444 | 0.6156   | 1.081  |
| 101199_at   | 39.6    | 5.5     | 6.1     | 12.2    | 24.9    | 45.6    | 24.3    | 21.6    | 0.230336037 | 15.85     | 29.1      | 13.25   | 0.54467354  | 0.1124   | 2.461  |
| 101200_at   | 7.1     | 9.1     | 2.4     | 6       | 4.5     | 9.2     | 6.1     | 5.5     | 0.923148916 | 6.15      | 6.325     | 0.175   | 0.972332016 | 0.7627   | 1.111  |
| 101201_r_at | 13.2    | 2.4     | 1.9     | 0.9     | 3.4     | 1.6     | 7.3     | 1.8     | 0.75091882  | 4.6       | 3.525     | 1.075   | 1.304964539 | 0.9475   | 1.046  |
| 101202_at   | 9.4     | 13      | 2.7     | 4.1     | 5.8     | 13      | 5.7     | 9.6     | 0.694296399 | 7.3       | 8.525     | 1.225   | 0.856304985 | 0.5321   | 1.317  |
| 101203_r_at | 9.4     | 3.4     | 2.4     | 8.6     | 8.6     | 10      | 1.3     | 6.9     | 0.783531505 | 5.95      | 6.7       | 0.75    | 0.888059701 | 0.9475   | 1.041  |
| 101204_at   | 10.5    | 8.6     | 6.4     | 7.8     | 10.1    | 12      | 7.8     | 8.1     | 0.401134345 | 8.325     | 9.5       | 1.175   | 0.876315789 | 0.403    | 1.14   |
| 101205_at   | 3.5     | 3.7     | 2.5     | 1.4     | 5.6     | 3.7     | 1.8     | 1.2     | 0.80177877  | 2.775     | 3.075     | 0.3     | 0.902439024 | 0.9898   | 1.005  |
| 101206_at   | 31.3    | 14.1    | 6.7     | 7.8     | 18      | 32.1    | 14.3    | 4.7     | 0.78428539  | 14.975    | 17.275    | 2.3     | 0.866859624 | 0.8156   | 1.139  |
| 101207_at   | 19876   | 21825.6 | 14828.2 | 16365.7 | 17620.7 | 17197.3 | 17230.3 | 17719   | 0.65896799  | 18223.875 | 17441.825 | 782.05  | 1.044837625 | 0.7279   | 1.033  |
| 101208_at   | 14.5    | 11.2    | 10.6    | 6.4     | 6.9     | 11.5    | 14.6    | 9.9     | 0.983444407 | 10.675    | 10.725    | 0.05    | 0.995337995 | 0.9713   | 1.009  |
| 101209_at   | 7.2     | 11      | 1.9     | 19.9    | 16.5    | 22.8    | 6       | 15.5    | 0.350757495 | 10        | 15.2      | 5.2     | 0.657894737 | 0.3278   | 1.85   |
| 101210_at   | 357     | 325     | 290.9   | 312.4   | 318.7   | 303.5   | 307     | 407     | 0.671286643 | 321.325   | 334.05    | 12.725  | 0.9619069   | 0.6886   | 1.035  |
| 101211_at   | 3.2     | 8.2     | 1.7     | 3.8     | 10.1    | 25.2    | 1.4     | 2       | 0.403413111 | 4.225     | 9.675     | 5.45    | 0.436692506 | 0.6523   | 1.428  |
| 101212_at   | 15220.5 | 17807.5 | 11682.6 | 12635.2 | 14269.6 | 13128.4 | 14230.7 | 14811.5 | 0.882512117 | 14336.45  | 14110.05  | 226.4   | 1.016045301 | 0.9743   | 1.003  |
| 101213_at   | 23390.8 | 25043.2 | 15215.4 | 17087   | 18117.2 | 18620.3 | 19634.2 | 20076.3 | 0.68657012  | 20184.1   | 19112     | 1072.1  | 1.056095647 | 0.7915   | -1.035 |
| 101214_f_at | 7687.8  | 8038    | 6229.4  | 5686.7  | 7655.9  | 6776.2  | 6826.1  | 6636.9  | 0.922477305 | 6910.475  | 6973.775  | 63.3    | 0.990923137 | 0.8484   | 1.018  |
| 101215_at   | 17.9    | 15.1    | 10.3    | 18.7    | 19.7    | 18.6    | 28.2    | 9.4     | 0.459466237 | 15.5      | 18.975    | 3.475   | 0.816864295 | 0.5768   | 1.17   |
| 101216_at   | 97.9    | 28.1    | 47.8    | 68.2    | 52      | 110.8   | 83.9    | 78.6    | 0.320885778 | 60.5      | 81.325    | 20.825  | 0.743928681 | 0.2862   | 1.435  |
| 101217_at   | 169.3   | 94.4    | 96.8    | 110.1   | 83.9    | 153.3   | 98.2    | 110.9   | 0.801314956 | 117.65    | 111.575   | 6.075   | 1.054447681 | 0.801    | -1.05  |
| 101218_at   | 78.8    | 61.4    | 74.1    | 95.8    | 62.1    | 79.3    | 106.3   | 81.6    | 0.692984559 | 77.525    | 82.325    | 4.8     | 0.941694503 | 0.7154   | 1.056  |
| 101219_at   | 30.2    | 33      | 23.7    | 27.4    | 16.1    | 68.8    | 45.9    | 23.3    | 0.467810044 | 28.575    | 38.525    | 9.95    | 0.741726152 | 0.6674   | 1.163  |
| 101220_at   | 13.4    | 30.1    | 15.7    | 15.7    | 33.7    | 23.3    | 52.6    | 46      | 0.045627975 | 18.725    | 38.9      | 20.175  | 0.481362468 | 0.0279   | 2.089  |
| 101221_at   | 255.9   | 227.5   | 247.2   | 243.7   | 203.6   | 258.8   | 280.5   | 206.7   | 0.775204668 | 243.575   | 237.4     | 6.175   | 1.026010952 | 0.6956   | -1.035 |
| 101222_f_at | 342.5   | 283.4   | 349.8   | 300     | 300.8   | 336.8   | 281.9   | 260.6   | 0.335865047 | 318.925   | 295.025   | 23.9    | 1.081010084 | 0.3327   | -1.082 |
| 101223_r_at | 1.7     | 18.8    | 8.1     | 4.4     | 4.7     | 7.1     | 11.8    | 15.3    | 0.753043037 | 8.25      | 9.725     | 1.475   | 0.848329049 | 0.4852   | 1.533  |
| 101224_at   | 12.3    | 9.8     | 7.5     | 29.4    | 5       | 10.8    | 8.9     | 15.2    | 0.426914474 | 14.75     | 9.975     | 4.775   | 1.478696742 | 0.4223   | -1.382 |
| 101225_at   | 186.8   | 144.9   | 140.7   | 143     | 138.8   | 185     | 171.5   | 160.1   | 0.522877162 | 153.85    | 163.85    | 10      | 0.938968569 | 0.5036   | 1.067  |
| 101226_at   | 183.7   | 148.9   | 150.7   | 190.6   | 147.8   | 223.7   | 184.6   | 244.6   | 0.251015065 | 168.475   | 200.175   | 31.7    | 0.841638566 | 0.2603   | 1.174  |
| 101227_at   | 57.8    | 46.9    | 37.1    | 21.9    | 21.7    | 39.9    | 36.5    | 44.7    | 0.589742572 | 40.925    | 35.7      | 5.225   | 1.146358543 | 0.6881   | -1.117 |
| 101228_at   | 19.4    | 35.7    | 25.4    | 50      | 29.5    | 25.8    | 11.8    | 11.9    | 0.170922469 | 32.625    | 19.75     | 12.875  | 1.651898734 | 0.1518   | -1.692 |
| 101229_at   | 16.9    | 31.2    | 38.1    | 48      | 16.2    | 22.2    | 35.8    | 38.9    | 0.557889689 | 33.55     | 28.275    | 5.275   | 1.186560566 | 0.6083   | -1.179 |



|             |         |         |         |         |         |         |         |         |             |          |           |         |             |         |        |
|-------------|---------|---------|---------|---------|---------|---------|---------|---------|-------------|----------|-----------|---------|-------------|---------|--------|
| 101230_at   | 42.8    | 12.7    | 22      | 7.1     | 8.7     | 23.9    | 12.7    | 9       | 0.426766094 | 21.15    | 13.575    | 7.575   | 1.55801105  | 0.5062  | -1.374 |
| 101231_at   | 48.3    | 43.9    | 32.1    | 24.3    | 20.5    | 43.8    | 15.7    | 37.9    | 0.412675937 | 37.15    | 29.475    | 7.675   | 1.260390161 | 0.3683  | -1.326 |
| 101232_at   | 19.1    | 5.6     | 9.9     | 3.4     | 1.3     | 21.1    | 1.6     | 9       | 0.836906532 | 9.5      | 8.25      | 1.25    | 1.151515152 | 0.5008  | -1.735 |
| 101233_at   | 44.2    | 46.9    | 32.3    | 45.9    | 31.9    | 54.8    | 32      | 18.4    | 0.383779034 | 42.325   | 34.275    | 8.05    | 1.234865062 | 0.2968  | -1.314 |
| 101234_at   | 22.4    | 13.2    | 24.4    | 63.1    | 46.2    | 55.1    | 76.5    | 70.1    | 0.061694771 | 30.775   | 61.975    | 31.2    | 0.496571198 | 0.04872 | 2.339  |
| 101235_f_at | 94.1    | 37.9    | 49.9    | 73.5    | 42.3    | 96.5    | 28.6    | 50.2    | 0.642524085 | 63.85    | 54.4      | 9.45    | 1.173713235 | 0.559   | -1.222 |
| 101254_at   | 13209.1 | 13428.4 | 10136.5 | 9862.6  | 10969.4 | 11344.9 | 11433.1 | 10939.5 | 0.648537591 | 11659.15 | 11171.725 | 487.425 | 1.043630236 | 0.7105  | -1.033 |
| 101255_at   | 24179.5 | 25143.8 | 14682.3 | 17133.2 | 18570.2 | 19852.6 | 19956.2 | 19694.9 | 0.787172007 | 20284.7  | 19518.475 | 766.225 | 1.039256397 | 0.9221  | -1.014 |
| 101276_at   | 6.4     | 1.4     | 2.2     | 1.4     | 5.9     | 3.1     | 1.9     | 3.6     | 0.617291155 | 2.85     | 3.625     | 0.775   | 0.786206897 | 0.4134  | 1.456  |
| 101277_at   | 49.4    | 29.8    | 33.8    | 26.7    | 34.1    | 45.9    | 38.1    | 21.5    | 0.997329388 | 34.925   | 34.9      | 0.025   | 1.000716332 | 0.9666  | 1.009  |
| 101278_at   | 55.4    | 90      | 88.8    | 77.4    | 41.7    | 90.9    | 26.4    | 58.8    | 0.204657455 | 77.9     | 54.45     | 23.45   | 1.43067034  | 0.1731  | -1.555 |
| 101279_f_at | 62.5    | 48.9    | 60.4    | 49.3    | 54.2    | 86.8    | 53.9    | 41.1    | 0.739147768 | 55.275   | 59        | 3.725   | 0.936864407 | 0.8461  | 1.035  |
| 101280_at   | 48.2    | 40.4    | 31.7    | 88.3    | 78.2    | 46.6    | 43.9    | 36.7    | 0.96072086  | 52.15    | 51.35     | 0.8     | 1.015579357 | 0.9479  | 1.019  |
| 101281_at   | 99.8    | 45.3    | 22.7    | 35.3    | 32      | 84.7    | 52      | 38      | 0.966847333 | 50.775   | 51.675    | 0.9     | 0.982583454 | 0.8037  | 1.103  |
| 101282_at   | 466.9   | 409.4   | 335.5   | 465     | 321.6   | 461.1   | 300.5   | 319.8   | 0.207666527 | 419.2    | 350.75    | 68.45   | 1.195153243 | 0.1888  | -1.203 |
| 101286_at   | 51.7    | 11.8    | 38.2    | 71.8    | 40      | 52.6    | 43.2    | 58.4    | 0.718305923 | 43.375   | 48.55     | 5.175   | 0.893408857 | 0.5002  | 1.336  |
| 101287_s_at | 12.1    | 10.8    | 8.8     | 8.8     | 7.2     | 10.4    | 8.8     | 7.6     | 0.184750928 | 10.125   | 8.5       | 1.625   | 1.191176471 | 0.1614  | -1.2   |
| 101288_at   | 11.7    | 9.4     | 29      | 9.5     | 9       | 41.5    | 8.4     | 15.9    | 0.694126286 | 14.9     | 18.7      | 3.8     | 0.796791444 | 0.7884  | 1.136  |
| 101289_f_at | 41      | 64.8    | 51.2    | 34.5    | 72.7    | 50.4    | 54.1    | 67.6    | 0.169579535 | 47.875   | 61.2      | 13.325  | 0.782271242 | 0.1573  | 1.3    |
| 101290_at   | 132.9   | 153.3   | 100.2   | 134.4   | 115.3   | 160.9   | 104.4   | 129     | 0.870723653 | 130.2    | 127.4     | 2.8     | 1.021978022 | 0.863   | 1.023  |
| 101291_at   | 112.7   | 92.3    | 87      | 84.2    | 66.8    | 72.8    | 99.4    | 95.6    | 0.356498938 | 94.05    | 83.65     | 10.4    | 1.124327555 | 0.3327  | -1.133 |
| 101292_f_at | 461.7   | 659.3   | 714.5   | 593     | 513.4   | 886.5   | 377.2   | 686.1   | 0.946829298 | 607.125  | 615.8     | 8.675   | 0.985912634 | 0.9162  | -1.023 |
| 101293_at   | 22.2    | 33.1    | 3.3     | 9.3     | 38.6    | 18.1    | 40.8    | 21.6    | 0.198317661 | 16.975   | 29.775    | 12.8    | 0.570109152 | 0.1843  | 2.286  |
| 101294_g_at | 870.6   | 777.9   | 757.2   | 592.7   | 654.6   | 893.7   | 837.4   | 674.3   | 0.858641923 | 749.6    | 765       | 15.4    | 0.979869281 | 0.8589  | 1.021  |
| 101295_s_at | 267.4   | 264.5   | 403.4   | 578.4   | 243.9   | 263.8   | 408.9   | 332.9   | 0.466687682 | 378.425  | 312.375   | 66.05   | 1.211444578 | 0.5005  | -1.172 |
| 101296_at   | 4.5     | 3.2     | 1.7     | 4.7     | 6.8     | 17.7    | 2.4     | 9.9     | 0.175979701 | 3.525    | 9.2       | 5.675   | 0.383152174 | 0.1486  | 2.227  |
| 101297_at   | 1.2     | 1.3     | 0.9     | 1.4     | 0.6     | 3.3     | 0.7     | 1.7     | 0.59451703  | 1.2      | 1.575     | 0.375   | 0.761904762 | 0.9022  | 1.054  |
| 101298_g_at | 6       | 31.5    | 29.8    | 6       | 4.9     | 10.1    | 33.3    | 29.2    | 0.919634183 | 18.325   | 19.375    | 1.05    | 0.945806452 | 0.893   | 1.096  |
| 101299_at   | 12.9    | 13.5    | 23.1    | 10.3    | 9.3     | 47      | 59      | 13      | 0.261318211 | 14.95    | 32.075    | 17.125  | 0.46609509  | 0.3269  | 1.687  |
| 101300_at   | 231.5   | 161     | 96.4    | 126.6   | 146.4   | 209.5   | 159.4   | 148.3   | 0.729113447 | 153.875  | 165.9     | 12.025  | 0.927516576 | 0.5882  | 1.124  |
| 101301_at   | 201.5   | 138.1   | 123.7   | 108.1   | 116.9   | 184.6   | 152.7   | 144.1   | 0.796398929 | 142.85   | 149.575   | 6.725   | 0.955039278 | 0.7216  | 1.063  |
| 101302_at   | 24.3    | 20.8    | 70.7    | 77.8    | 18.8    | 33.2    | 60.6    | 113.9   | 0.761658101 | 48.4     | 56.625    | 8.225   | 0.854746137 | 0.8391  | 1.117  |
| 101303_at   | 48.5    | 24.6    | 36.5    | 63.8    | 40      | 53.5    | 81.8    | 50.7    | 0.324160508 | 43.35    | 56.5      | 13.15   | 0.767256637 | 0.2942  | 1.337  |
| 101305_at   | 15.1    | 32.9    | 54.1    | 48.8    | 47.7    | 35.3    | 6.9     | 52.5    | 0.880059594 | 37.725   | 35.6      | 2.125   | 1.059691011 | 0.7421  | -1.211 |
| 101306_f_at | 10.1    | 9.6     | 5.3     | 5.9     | 8.1     | 14.2    | 8.5     | 9.4     | 0.262162829 | 7.725    | 10.05     | 2.325   | 0.768656716 | 0.2336  | 1.318  |
| 101307_at   | 48.3    | 49      | 37      | 41.1    | 28.5    | 52.2    | 35.5    | 42.5    | 0.507431892 | 43.85    | 39.675    | 4.175   | 1.105229994 | 0.4468  | -1.126 |
| 101308_at   | 14.1    | 32.8    | 24.4    | 40.9    | 8.2     | 21.6    | 47.4    | 35.7    | 0.98702367  | 28.05    | 28.225    | 0.175   | 0.993799823 | 0.818   | -1.114 |
| 101309_at   | 22.8    | 17.1    | 16.9    | 14      | 15.9    | 33.9    | 18.5    | 17.4    | 0.460373965 | 17.7     | 21.425    | 3.725   | 0.82613769  | 0.4564  | 1.172  |
| 101310_at   | 18.1    | 16.8    | 10.9    | 42.6    | 21.4    | 35.9    | 16.6    | 25.3    | 0.753538688 | 22.1     | 24.8      | 2.7     | 0.891129032 | 0.5512  | 1.229  |
| 101311_at   | 21.2    | 15.3    | 13.2    | 8.9     | 12.7    | 20      | 29.4    | 8.1     | 0.609745679 | 14.65    | 17.55     | 2.9     | 0.834757835 | 0.7406  | 1.122  |
| 101312_at   | 18.1    | 12.6    | 16.3    | 22.6    | 29.5    | 24.4    | 19.8    | 13.1    | 0.338646654 | 17.4     | 21.7      | 4.3     | 0.801843318 | 0.3865  | 1.22   |
| 101313_r_at | 36      | 20.6    | 13.3    | 14.2    | 24.9    | 57.3    | 27.8    | 23.1    | 0.257470829 | 21.025   | 33.275    | 12.25   | 0.631855748 | 0.1798  | 1.601  |
| 101314_at   | 15.5    | 44.9    | 29.5    | 20.5    | 20.7    | 70.7    | 12.3    | 9       | 0.972594256 | 27.6     | 28.175    | 0.575   | 0.979591837 | 0.6545  | -1.271 |
| 101315_at   | 74.6    | 20.6    | 25.5    | 37.6    | 36      | 71.4    | 43.7    | 28.8    | 0.737980347 | 39.575   | 44.975    | 5.4     | 0.879933296 | 0.5868  | 1.217  |
| 101316_at   | 13.5    | 12.1    | 11.6    | 6.1     | 9.8     | 32.1    | 7.1     | 10.5    | 0.542718765 | 10.825   | 14.875    | 4.05    | 0.727731092 | 0.6576  | 1.19   |
| 101317_f_at | 146.2   | 72.9    | 65.3    | 96.3    | 95.8    | 136.7   | 108.7   | 161.3   | 0.242836494 | 95.175   | 125.625   | 30.45   | 0.75761194  | 0.2002  | 1.361  |
| 101318_at   | 8.1     | 6.7     | 5.3     | 5.7     | 6.4     | 8.7     | 4.5     | 6.3     | 0.982069465 | 6.45     | 6.475     | 0.025   | 0.996138996 | 0.9374  | 1.014  |
| 101319_f_at | 14.2    | 5.1     | 5.2     | 42.9    | 34.1    | 58.1    | 14.2    | 29.2    | 0.230093456 | 16.85    | 33.9      | 17.05   | 0.497050147 | 0.1432  | 2.672  |
| 101320_f_at | 8.8     | 7.1     | 9.3     | 6.3     | 20.5    | 26.7    | 9.7     | 3.5     | 0.261041428 | 7.875    | 15.1      | 7.225   | 0.521523179 | 0.4182  | 1.5    |
| 101321_r_at | 27.3    | 5.1     | 6.7     | 2.1     | 2.9     | 3.6     | 3.7     | 8.4     | 0.402040995 | 10.3     | 4.65      | 5.65    | 2.215053763 | 0.4642  | -1.572 |
| 101324_r_at | 2.7     | 6.9     | 1.8     | 11.9    | 9.9     | 24      | 23.6    | 17.3    | 0.022021311 | 5.825    | 18.7      | 12.875  | 0.311497326 | 0.02889 | 3.979  |
| 101325_r_at | 78.9    | 40.9    | 134.5   | 87.9    | 75.6    | 142.3   | 82.4    | 100.3   | 0.572468493 | 85.55    | 100.15    | 14.6    | 0.854218672 | 0.4837  | 1.236  |
| 101326_at   | 49.8    | 29.7    | 11.7    | 12.5    | 14.6    | 65.8    | 34.7    | 73      | 0.250694349 | 25.925   | 47.025    | 21.1    | 0.551302499 | 0.2812  | 1.829  |
| 101327_at   | 27.5    | 42.2    | 37.6    | 62.8    | 41.8    | 34.2    | 38.7    | 40.7    | 0.659356211 | 42.525   | 38.85     | 3.675   | 1.094594595 | 0.7903  | -1.05  |
| 101328_at   | 215.3   | 288.2   | 320.7   | 236.1   | 139.4   | 293.6   | 269.3   | 225.3   | 0.458582934 | 265.075  | 231.9     | 33.175  | 1.143057352 | 0.4333  | -1.173 |
| 101329_f_at | 7.2     | 4.8     | 6.1     | 9.2     | 6.3     | 19.3    | 4.8     | 4       | 0.662020026 | 6.825    | 8.6       | 1.775   | 0.793604651 | 0.9018  | 1.05   |



|             |        |        |        |        |        |        |        |        |             |          |         |         |             |         |        |
|-------------|--------|--------|--------|--------|--------|--------|--------|--------|-------------|----------|---------|---------|-------------|---------|--------|
| 101330_f_at | 39     | 13     | 11.5   | 11.4   | 36.9   | 52.2   | 41     | 11.1   | 0.186000897 | 18.725   | 35.3    | 16.575  | 0.530453258 | 0.208   | 1.904  |
| 101331_f_at | 3.7    | 2.5    | 2.5    | 4      | 2.9    | 4.1    | 3.9    | 6.2    | 0.229171401 | 3.175    | 4.275   | 1.1     | 0.742690058 | 0.1843  | 1.347  |
| 101332_at   | 19.3   | 21.8   | 20.2   | 24     | 23.3   | 27.5   | 21.6   | 19     | 0.493846247 | 21.325   | 22.85   | 1.525   | 0.933260394 | 0.5119  | 1.065  |
| 101333_at   | 116.3  | 100.5  | 128.8  | 136.2  | 96.4   | 122.3  | 150.7  | 145.7  | 0.595222177 | 120.45   | 128.775 | 8.325   | 0.935352359 | 0.6513  | 1.06   |
| 101334_at   | 17.5   | 57.4   | 35.4   | 78.2   | 33.7   | 43.7   | 17.4   | 42.9   | 0.428983531 | 47.125   | 34.425  | 12.7    | 1.368917938 | 0.5759  | -1.26  |
| 101335_at   | 39.4   | 50.2   | 41.6   | 14.8   | 36.9   | 39     | 40.8   | 51.7   | 0.535330572 | 36.5     | 42.1    | 5.6     | 0.866983373 | 0.4536  | 1.255  |
| 101336_at   | 81.5   | 72.8   | 52.7   | 89     | 62.3   | 95.4   | 63.8   | 50.9   | 0.650313096 | 74       | 68.1    | 5.9     | 1.086637298 | 0.6218  | -1.095 |
| 101337_at   | 11.5   | 22.5   | 4.8    | 4.5    | 5.9    | 32.5   | 4.7    | 20.5   | 0.544816856 | 10.825   | 15.9    | 5.075   | 0.68081761  | 0.6402  | 1.349  |
| 101338_f_at | 222.3  | 86     | 176    | 80.3   | 189.5  | 289.5  | 202.2  | 139.3  | 0.220914444 | 141.15   | 205.125 | 63.975  | 0.688117002 | 0.1916  | 1.546  |
| 101339_at   | 146.8  | 168.4  | 77.8   | 79.2   | 30.2   | 149.3  | 82.5   | 87.2   | 0.396621094 | 118.05   | 87.3    | 30.75   | 1.352233677 | 0.3596  | -1.472 |
| 101340_at   | 8.2    | 10.2   | 7.8    | 11.7   | 12.7   | 14.1   | 9.8    | 10.9   | 0.118212993 | 9.475    | 11.875  | 2.4     | 0.797894737 | 0.1128  | 1.259  |
| 101341_at   | 196    | 174.3  | 185.6  | 198.1  | 151.5  | 306.3  | 219.5  | 220.7  | 0.340483916 | 188.5    | 224.5   | 36      | 0.839643653 | 0.3605  | 1.156  |
| 101342_at   | 36.5   | 33.2   | 30.7   | 57.4   | 27.2   | 57     | 35.3   | 29.6   | 0.819688978 | 39.45    | 37.275  | 2.175   | 1.058350101 | 0.7611  | -1.071 |
| 101343_at   | 75.3   | 71.5   | 44.6   | 45.9   | 32.8   | 76.2   | 57.2   | 56.4   | 0.771099886 | 59.325   | 55.65   | 3.675   | 1.066037736 | 0.7402  | -1.081 |
| 101344_at   | 393.8  | 362.9  | 304.7  | 334    | 330.4  | 473.1  | 348.5  | 359.9  | 0.473591974 | 348.85   | 377.975 | 29.125  | 0.922944639 | 0.4719  | 1.077  |
| 101345_at   | 17.9   | 15.6   | 13.4   | 14.6   | 11.9   | 19.6   | 15.8   | 14.8   | 0.938729219 | 15.375   | 15.525  | 0.15    | 0.990338164 | 0.9924  | 1.001  |
| 101346_at   | 53.8   | 33.8   | 30.4   | 17.1   | 6.4    | 57.8   | 27.9   | 40.2   | 0.959621223 | 33.775   | 33.075  | 0.7     | 1.021164021 | 0.7145  | -1.228 |
| 101347_at   | 79     | 49.6   | 34.7   | 61     | 53.9   | 83.8   | 52     | 35.5   | 0.987458264 | 56.075   | 56.3    | 0.225   | 0.996003552 | 0.9959  | 1.001  |
| 101348_at   | 87.9   | 17.8   | 50.4   | 76.8   | 57.6   | 66.3   | 97     | 56     | 0.573812438 | 58.225   | 69.225  | 11      | 0.841097869 | 0.4514  | 1.361  |
| 101349_at   | 20.9   | 35.6   | 23.9   | 31.1   | 4.2    | 8.4    | 19.5   | 7.3    | 0.00883385  | 27.875   | 9.85    | 18.025  | 2.829949239 | 0.01344 | -3.24  |
| 101350_g_at | 786    | 536.1  | 885.1  | 893.3  | 554.3  | 597.6  | 760.7  | 622.9  | 0.200335415 | 775.125  | 633.875 | 141.25  | 1.222835733 | 0.2205  | -1.207 |
| 101351_at   | 19.4   | 3.1    | 1.1    | 2.8    | 1.8    | 5.4    | 0.9    | 4      | 0.471322466 | 6.6      | 3.025   | 3.575   | 2.181818182 | 0.5806  | -1.531 |
| 101352_g_at | 99.3   | 57.8   | 67.8   | 68.8   | 56.3   | 90.8   | 64     | 59.6   | 0.647337661 | 73.425   | 67.675  | 5.75    | 1.084964906 | 0.6313  | -1.083 |
| 101353_at   | 1.1    | 10.9   | 1      | 1      | 1.4    | 2.8    | 2.3    | 3.5    | 0.715071015 | 3.5      | 2.5     | 1       | 1.4         | 0.6996  | 1.287  |
| 101354_at   | 10.1   | 9.8    | 5.4    | 7.3    | 6.8    | 9.7    | 7.9    | 6.6    | 0.773582931 | 8.15     | 7.75    | 0.4     | 1.051612903 | 0.8716  | 1.029  |
| 101355_at   | 143.8  | 84.7   | 144.4  | 56.2   | 145.7  | 113.5  | 81.2   | 148.6  | 0.60294887  | 107.275  | 122.25  | 14.975  | 0.877505112 | 0.537   | 1.192  |
| 101356_at   | 101    | 103.8  | 129.9  | 194.8  | 138.9  | 132    | 132.9  | 173.8  | 0.640875626 | 132.375  | 144.4   | 12.025  | 0.916724377 | 0.5058  | 1.124  |
| 101357_at   | 162.9  | 145.2  | 289.8  | 196.7  | 166.1  | 193.3  | 110    | 157.8  | 0.308554784 | 198.65   | 156.8   | 41.85   | 1.26690051  | 0.2957  | -1.247 |
| 101358_at   | 16.7   | 63.9   | 107.3  | 156.6  | 73.4   | 40.5   | 119.3  | 148.9  | 0.814964083 | 86.125   | 95.525  | 9.4     | 0.901596441 | 0.6522  | 1.309  |
| 101359_at   | 324.9  | 206.8  | 200.1  | 270.1  | 233.5  | 302.5  | 276.5  | 283.1  | 0.511298465 | 250.475  | 273.9   | 23.425  | 0.914476086 | 0.4414  | 1.111  |
| 101362_at   | 217.9  | 161.7  | 300.2  | 234.4  | 99     | 238.7  | 320.9  | 185.1  | 0.760102141 | 228.55   | 210.925 | 17.625  | 1.083560507 | 0.6306  | -1.153 |
| 101363_at   | 214.8  | 168.5  | 162.5  | 244.5  | 195.5  | 222.9  | 203.9  | 227.8  | 0.516286529 | 197.575  | 212.525 | 14.95   | 0.929655335 | 0.4452  | 1.089  |
| 101364_at   | 23.2   | 20.3   | 18     | 15.4   | 14.9   | 35.3   | 16.1   | 14.9   | 0.84939287  | 19.225   | 20.3    | 1.075   | 0.947044335 | 0.9741  | 1.008  |
| 101366_f_at | 210.2  | 169.1  | 158.9  | 154.7  | 189.2  | 221.5  | 168.2  | 187    | 0.320705194 | 173.225  | 191.475 | 18.25   | 0.904687296 | 0.2959  | 1.108  |
| 101367_at   | 1127.4 | 1211.7 | 1500.8 | 1524.1 | 1064.8 | 753.6  | 1093.5 | 1228.3 | 0.074770251 | 1341     | 1035.05 | 305.95  | 1.295589585 | 0.08612 | -1.305 |
| 101368_at   | 243.8  | 244.8  | 202.5  | 246.2  | 316.3  | 264.7  | 114.5  | 227    | 0.937899271 | 234.325  | 230.625 | 3.7     | 1.01604336  | 0.7426  | -1.081 |
| 101369_at   | 528.8  | 330.7  | 369.6  | 265.7  | 337    | 352.8  | 244.2  | 362.7  | 0.46729805  | 373.7    | 324.175 | 49.525  | 1.152772422 | 0.4999  | -1.13  |
| 101370_at   | 385.2  | 429.9  | 580.2  | 439.7  | 496.8  | 403.8  | 740.6  | 573.3  | 0.305306371 | 458.75   | 553.625 | 94.875  | 0.828629487 | 0.2994  | 1.192  |
| 101371_at   | 770.3  | 746.7  | 737    | 666.6  | 677.6  | 645    | 639.7  | 586.3  | 0.019773178 | 730.15   | 637.15  | 93      | 1.145962489 | 0.02011 | -1.146 |
| 101372_at   | 333.7  | 225.1  | 235.6  | 186.4  | 343    | 303.2  | 357.2  | 377.3  | 0.041237323 | 245.2    | 345.175 | 99.975  | 0.710364308 | 0.03196 | 1.436  |
| 101374_at   | 88.6   | 56.1   | 45     | 69.2   | 33.3   | 91     | 43.5   | 37.1   | 0.444700113 | 64.725   | 51.225  | 13.5    | 1.263543192 | 0.3258  | -1.334 |
| 101375_at   | 10.5   | 14.1   | 9.6    | 7.8    | 13.5   | 23.9   | 14.4   | 15.8   | 0.068989727 | 10.5     | 16.9    | 6.4     | 0.621301775 | 0.03918 | 1.599  |
| 101376_at   | 147.4  | 72.2   | 48.3   | 86.8   | 61.5   | 112.3  | 87.2   | 69.3   | 0.809933906 | 88.675   | 82.575  | 6.1     | 1.073872237 | 0.9514  | -1.017 |
| 101377_at   | 108.3  | 88.9   | 88.2   | 117.4  | 94.9   | 103.9  | 101.7  | 87.6   | 0.672706951 | 100.7    | 97.025  | 3.675   | 1.037876836 | 0.7111  | 1.032  |
| 101380_at   | 326.5  | 360    | 227.1  | 224.8  | 331.6  | 313.6  | 231.7  | 326    | 0.713991243 | 284.6    | 300.725 | 16.125  | 0.946379583 | 0.6663  | 1.07   |
| 101381_at   | 288.1  | 190.5  | 197.7  | 176.7  | 218.5  | 161.7  | 192.5  | 236.8  | 0.732560978 | 213.25   | 202.375 | 10.875  | 1.053736875 | 0.7606  | -1.045 |
| 101382_at   | 169.6  | 242.7  | 268.6  | 284.9  | 257.9  | 326.3  | 230.1  | 261.1  | 0.434637389 | 241.45   | 268.85  | 27.4    | 0.898084434 | 0.4216  | 1.126  |
| 101383_at   | 226.9  | 156.1  | 136.8  | 180.4  | 163.4  | 283.7  | 208.1  | 203    | 0.262895936 | 175.05   | 214.55  | 39.5    | 0.815893731 | 0.2464  | 1.223  |
| 101384_at   | 55.5   | 111.7  | 89.1   | 103.2  | 64.6   | 40.4   | 19.7   | 70.6   | 0.052622375 | 89.875   | 48.825  | 41.05   | 1.840757808 | 0.08294 | -1.991 |
| 101385_at   | 1226.9 | 1157.8 | 1179.1 | 1013.1 | 970.2  | 1045.6 | 853.7  | 1028.7 | 0.036568744 | 1144.225 | 974.55  | 169.675 | 1.174105998 | 0.04065 | -1.175 |
| 101386_at   | 80.5   | 31.7   | 30.5   | 60.5   | 52.4   | 52.4   | 31.8   | 39.9   | 0.637117118 | 50.8     | 44.125  | 6.675   | 1.151274788 | 0.7903  | -1.078 |
| 101387_at   | 527.9  | 468.2  | 445.1  | 376.7  | 428.3  | 522.7  | 411.6  | 396.7  | 0.740455511 | 454.475  | 439.825 | 14.65   | 1.033308702 | 0.7481  | -1.032 |
| 101388_at   | 7.9    | 23.4   | 4.5    | 12.6   | 4.6    | 19.1   | 18.9   | 17.6   | 0.605235218 | 12.1     | 15.05   | 2.95    | 0.803986711 | 0.6196  | 1.295  |
| 101389_at   | 362.1  | 416.2  | 360.8  | 337.5  | 372.2  | 338.9  | 291.9  | 268.5  | 0.12866928  | 369.15   | 317.875 | 51.275  | 1.161305545 | 0.1206  | -1.167 |
| 101390_at   | 48.3   | 48.3   | 23.9   | 34     | 112.5  | 43.2   | 8.3    | 66.7   | 0.454867744 | 38.625   | 57.675  | 19.05   | 0.66970091  | 0.8858  | 1.092  |
| 101392_at   | 326.3  | 323.5  | 433.5  | 532.3  | 372.4  | 246.2  | 425.4  | 471.7  | 0.732329773 | 403.9    | 378.925 | 24.975  | 1.065910141 | 0.7201  | -1.073 |



|             |        |        |        |        |        |        |        |        |             |          |          |         |             |           |        |
|-------------|--------|--------|--------|--------|--------|--------|--------|--------|-------------|----------|----------|---------|-------------|-----------|--------|
| 101393_at   | 560.4  | 566.3  | 587.8  | 780.7  | 1005.3 | 615.1  | 944.7  | 571.4  | 0.258375256 | 623.8    | 784.125  | 160.325 | 0.795536426 | 0.2552    | 1.23   |
| 101394_at   | 32.9   | 16.2   | 17.7   | 29.6   | 27.2   | 41.1   | 16.3   | 31.1   | 0.494776324 | 24.1     | 28.925   | 4.825   | 0.833189283 | 0.5244    | 1.195  |
| 101395_at   | 172.5  | 169.9  | 138.8  | 147.2  | 118.5  | 229.4  | 125.3  | 131.7  | 0.842323957 | 157.1    | 151.225  | 5.875   | 1.038849397 | 0.671     | -1.075 |
| 101396_at   | 3.9    | 7.1    | 10.6   | 4.1    | 3.8    | 15.8   | 4.7    | 23.9   | 0.333639164 | 6.425    | 12.05    | 5.625   | 0.533195021 | 0.4308    | 1.537  |
| 101397_at   | 220.2  | 237.8  | 261.8  | 273.9  | 222.7  | 265.9  | 224.5  | 225.3  | 0.419598853 | 248.425  | 234.6    | 13.825  | 1.058930094 | 0.4175    | -1.058 |
| 101398_at   | 667.7  | 494.5  | 535.5  | 477.7  | 543    | 665.1  | 507.4  | 515.5  | 0.814013753 | 543.85   | 557.75   | 13.9    | 0.97507844  | 0.7839    | 1.028  |
| 101399_at   | 388.9  | 429.6  | 428    | 537.8  | 505    | 386.2  | 504.2  | 615.7  | 0.361064279 | 446.075  | 502.775  | 56.7    | 0.887225896 | 0.3727    | 1.12   |
| 101401_at   | 223.8  | 226    | 284.2  | 250    | 162.3  | 165.3  | 309.1  | 242.7  | 0.527659991 | 246      | 219.85   | 26.15   | 1.118944735 | 0.4166    | -1.156 |
| 101402_at   | 947    | 840.6  | 967.6  | 905.3  | 924.8  | 978.5  | 856.9  | 1016.8 | 0.538934173 | 915.125  | 944.25   | 29.125  | 0.969155414 | 0.5497    | 1.031  |
| 101403_at   | 15     | 16.6   | 17.3   | 34.4   | 46.1   | 22.1   | 38     | 30.3   | 0.101673382 | 20.825   | 34.125   | 13.3    | 0.61025641  | 0.08113   | 1.678  |
| 101404_at   | 127    | 117.8  | 114.8  | 146.5  | 179.4  | 139.7  | 161.5  | 136    | 0.07230874  | 126.525  | 154.15   | 27.625  | 0.820791437 | 0.06058   | 1.216  |
| 101405_at   | 247.8  | 340.9  | 452.5  | 368    | 269.2  | 316.7  | 266.4  | 249.5  | 0.16565334  | 352.3    | 275.45   | 76.85   | 1.278998003 | 0.1427    | -1.255 |
| 101406_at   | 79.2   | 60.9   | 66.7   | 81.1   | 73.5   | 120.4  | 60     | 98.6   | 0.324241802 | 71.975   | 88.125   | 16.15   | 0.816737589 | 0.3424    | 1.19   |
| 101407_at   | 299.5  | 326.8  | 265.8  | 251.8  | 316    | 230.4  | 226.2  | 254.6  | 0.31837751  | 285.975  | 256.8    | 29.175  | 1.113609813 | 0.2922    | -1.118 |
| 101408_at   | 1757.7 | 1463.4 | 1244.7 | 1369.5 | 1055.3 | 1776.2 | 905.2  | 1305.3 | 0.409979634 | 1458.825 | 1260.5   | 198.325 | 1.157338358 | 0.3357    | -1.186 |
| 101409_at   | 668    | 695    | 477.4  | 431.6  | 642.3  | 602.3  | 462.7  | 466.1  | 0.772276911 | 568      | 543.35   | 24.65   | 1.045366707 | 0.8236    | -1.035 |
| 101410_at   | 116.1  | 33.2   | 84.3   | 85.9   | 48.5   | 123.5  | 25.1   | 85.2   | 0.747851249 | 79.875   | 70.575   | 9.3     | 1.131774708 | 0.6741    | -1.215 |
| 101412_at   | 857.2  | 945.8  | 958.2  | 891.3  | 438.2  | 358.4  | 365.4  | 370.7  | 3.55423E-06 | 913.125  | 383.175  | 529.95  | 2.38304952  | 0.0000033 | -2.389 |
| 101413_at   | 35.7   | 31.6   | 25.5   | 28.5   | 23.4   | 20.1   | 20.8   | 19.6   | 0.017178988 | 30.325   | 20.975   | 9.35    | 1.445768772 | 0.004383  | -1.437 |
| 101414_at   | 284.4  | 231.8  | 258.7  | 216.9  | 186.3  | 254.6  | 207.2  | 270.8  | 0.491796863 | 247.95   | 229.725  | 18.225  | 1.079333986 | 0.4667    | -1.086 |
| 101415_i_at | 44.7   | 27.3   | 39.2   | 40.7   | 70.9   | 49.8   | 44.7   | 43.6   | 0.112643392 | 37.975   | 52.25    | 14.275  | 0.726794258 | 0.08946   | 1.371  |
| 101416_f_at | 519.4  | 596.7  | 429.7  | 506.9  | 550.1  | 625    | 478.3  | 605.6  | 0.318780675 | 513.175  | 564.75   | 51.575  | 0.908676405 | 0.3226    | 1.102  |
| 101417_at   | 24.6   | 9.1    | 33.1   | 19     | 28.5   | 59.4   | 19.3   | 23.7   | 0.330492057 | 21.45    | 32.725   | 11.275  | 0.655462185 | 0.2935    | 1.53   |
| 101419_at   | 232.7  | 249.2  | 242.2  | 179.6  | 201.5  | 240.6  | 200.1  | 200.5  | 0.451284102 | 225.925  | 210.675  | 15.25   | 1.072386377 | 0.4871    | -1.067 |
| 101420_at   | 7.1    | 8.7    | 9.9    | 9.3    | 9.4    | 24.7   | 7.5    | 16.4   | 0.237304716 | 8.75     | 14.5     | 5.75    | 0.603448276 | 0.1992    | 1.495  |
| 101421_at   | 1497.3 | 1109.3 | 1196.4 | 955.5  | 1108.4 | 1555.3 | 1117   | 1166.1 | 0.773516534 | 1189.625 | 1236.7   | 47.075  | 0.961934988 | 0.7459    | 1.043  |
| 101422_at   | 404.8  | 370.8  | 418.7  | 615.6  | 464.4  | 457.9  | 472    | 517.4  | 0.68207634  | 452.475  | 477.925  | 25.45   | 0.946748967 | 0.548     | 1.076  |
| 101423_at   | 315.6  | 219.7  | 385.5  | 299.9  | 170.4  | 319.7  | 418.6  | 308.3  | 0.988525935 | 305.175  | 304.25   | 0.925   | 1.003040263 | 0.8881    | 1.033  |
| 101424_at   | 92.6   | 139.9  | 81.8   | 113.4  | 176.2  | 97.2   | 129.5  | 132.4  | 0.243168399 | 106.925  | 133.825  | 26.9    | 0.79899122  | 0.2343    | 1.25   |
| 101425_at   | 491.4  | 493    | 484.4  | 438.3  | 472.5  | 532.5  | 434.8  | 508.9  | 0.694863275 | 476.775  | 487.175  | 10.4    | 0.978652435 | 0.7192    | 1.02   |
| 101426_at   | 371.9  | 362.2  | 373.6  | 366.1  | 255.9  | 372.7  | 358.2  | 338    | 0.248813182 | 368.45   | 331.2    | 37.25   | 1.112469807 | 0.2196    | -1.124 |
| 101428_at   | 42.1   | 16.2   | 40     | 9.3    | 40.3   | 17.3   | 24.1   | 29.2   | 0.935052607 | 26.9     | 27.725   | 0.825   | 0.970243463 | 0.6982    | 1.18   |
| 101429_at   | 252.1  | 245.8  | 273.2  | 303.5  | 358.3  | 269.9  | 246.2  | 300.3  | 0.407888081 | 268.65   | 293.675  | 25.025  | 0.914786754 | 0.4117    | 1.086  |
| 101430_at   | 1457.9 | 1363.6 | 1690.1 | 1585.5 | 1191.2 | 1194.4 | 1594.8 | 1426.2 | 0.208994321 | 1524.275 | 1351.65  | 172.625 | 1.127714275 | 0.1956    | -1.133 |
| 101431_at   | 47.8   | 30.9   | 27.6   | 30.9   | 30.7   | 46.8   | 24.8   | 29.7   | 0.850563846 | 34.3     | 33       | 1.3     | 1.039393939 | 0.8208    | -1.044 |
| 101432_at   | 215.8  | 264.2  | 229.9  | 282.7  | 246.1  | 250.5  | 278    | 316.9  | 0.311807383 | 248.15   | 272.875  | 24.725  | 0.909390747 | 0.3045    | 1.1    |
| 101433_at   | 283.2  | 153.8  | 231.3  | 188.9  | 234.2  | 241.2  | 295    | 274    | 0.202231624 | 214.3    | 261.1    | 46.8    | 0.82075833  | 0.1744    | 1.245  |
| 101435_at   | 129.8  | 99     | 72.3   | 115.8  | 94.9   | 137.6  | 91.7   | 93     | 0.996549194 | 104.225  | 104.3    | 0.075   | 0.99928092  | 0.9881    | 1.003  |
| 101436_at   | 18.5   | 2.7    | 3.9    | 4.4    | 3.7    | 24.4   | 2.6    | 4.9    | 0.820017997 | 7.375    | 8.9      | 1.525   | 0.828651685 | 0.9216    | 1.069  |
| 101437_at   | 200    | 169.6  | 181    | 231.9  | 154.3  | 180.8  | 221.6  | 235.8  | 0.917756159 | 195.625  | 198.125  | 2.5     | 0.987381703 | 0.9619    | 1.006  |
| 101439_at   | 617    | 550    | 567.9  | 461.2  | 612.9  | 572.5  | 631.4  | 529.4  | 0.384573085 | 549.025  | 586.55   | 37.525  | 0.936024209 | 0.3771    | 1.072  |
| 101440_at   | 245.9  | 221.1  | 212.3  | 289.1  | 212.5  | 303.4  | 263.7  | 222.4  | 0.766742846 | 242.1    | 250.5    | 8.4     | 0.966467066 | 0.7801    | 1.032  |
| 101441_i_at | 223.1  | 298.5  | 298.9  | 275.7  | 403.8  | 259.5  | 325.9  | 255.6  | 0.390802868 | 274.05   | 311.2    | 37.15   | 0.880623393 | 0.4001    | 1.123  |
| 101442_f_at | 114.3  | 113.7  | 124.8  | 43.6   | 169.6  | 38.6   | 104.5  | 111.9  | 0.837137544 | 99.1     | 106.15   | 7.05    | 0.93358455  | 0.9615    | 1.02   |
| 101443_at   | 34     | 53.9   | 34.7   | 38.3   | 44.2   | 81.1   | 54.4   | 38.9   | 0.234552305 | 40.225   | 54.65    | 14.425  | 0.736047575 | 0.1909    | 1.329  |
| 101444_at   | 1219.1 | 916.2  | 899.7  | 844    | 952.8  | 1017.6 | 902.8  | 786.9  | 0.600124965 | 969.75   | 915.025  | 54.725  | 1.059807109 | 0.6154    | -1.053 |
| 101445_at   | 1812.6 | 1428.7 | 1830.2 | 2012.8 | 1200.2 | 1529.5 | 1569.8 | 1692.9 | 0.143470504 | 1771.075 | 1498.1   | 272.975 | 1.182214138 | 0.1589    | -1.183 |
| 101446_at   | 1022.2 | 1107   | 958.2  | 788.8  | 1443.5 | 1169   | 961    | 1152.5 | 0.133696853 | 969.05   | 1181.5   | 212.45  | 0.820186204 | 0.1266    | 1.216  |
| 101447_at   | 236.8  | 213.9  | 227.5  | 271.3  | 199.2  | 257.8  | 285.1  | 262.9  | 0.555603123 | 237.375  | 251.25   | 13.875  | 0.944776119 | 0.5942    | 1.053  |
| 101448_at   | 1943.1 | 1544.7 | 1590.2 | 1437.5 | 1473.7 | 2025.1 | 1402.2 | 1288.3 | 0.695341447 | 1628.875 | 1547.325 | 81.55   | 1.05270386  | 0.6277    | -1.062 |
| 101449_at   | 419.1  | 458.7  | 576.8  | 653.6  | 479.8  | 508.4  | 431.5  | 581.7  | 0.686938616 | 527.05   | 500.35   | 26.7    | 1.053362646 | 0.7361    | -1.043 |
| 101450_at   | 219.9  | 266.2  | 171.4  | 238.1  | 186.8  | 171.7  | 314    | 219.1  | 0.979827087 | 223.9    | 222.9    | 1       | 1.004486317 | 0.9074    | 1.02   |
| 101451_at   | 2616.8 | 3145.7 | 2450.3 | 3961.4 | 1719.6 | 2301.2 | 5194.1 | 4869   | 0.641114219 | 3043.55  | 3520.975 | 477.425 | 0.864405456 | 0.855     | 1.058  |
| 101453_at   | 95.2   | 101.4  | 63.7   | 65.3   | 88.5   | 129    | 70.7   | 104    | 0.334463845 | 81.4     | 98.05    | 16.65   | 0.830188679 | 0.337     | 1.202  |
| 101455_at   | 134.3  | 157.3  | 232.7  | 137.7  | 113.8  | 174    | 242.2  | 195.5  | 0.667970032 | 165.5    | 181.375  | 15.875  | 0.912474156 | 0.7038    | 1.084  |
| 101456_at   | 361.3  | 440.2  | 530.9  | 440.8  | 281.2  | 474.8  | 599.1  | 524.7  | 0.742534634 | 443.3    | 469.95   | 26.65   | 0.94329184  | 0.8753    | -1.03  |



|             |        |         |        |        |        |        |        |        |              |          |          |         |             |         |        |
|-------------|--------|---------|--------|--------|--------|--------|--------|--------|--------------|----------|----------|---------|-------------|---------|--------|
| 101457_at   | 222.1  | 246.9   | 235.4  | 267.6  | 265.8  | 196.6  | 238.3  | 258.1  | 0.863538921  | 243      | 239.7    | 3.3     | 1.013767209 | 0.8265  | 1.018  |
| 101458_at   | 405.5  | 282     | 624.9  | 727.3  | 307.7  | 351.5  | 377.7  | 455.3  | 0.274175423  | 509.925  | 373.05   | 136.875 | 1.366907921 | 0.3065  | -1.293 |
| 101459_at   | 678.3  | 612.2   | 613    | 772.7  | 628.6  | 471.7  | 665.3  | 605.1  | 0.227046288  | 669.05   | 592.675  | 76.375  | 1.128864892 | 0.2315  | -1.133 |
| 101461_f_at | 9414.7 | 10654.9 | 7892.2 | 7382.1 | 9200.7 | 8433.4 | 7950.3 | 8385   | 0.687018988  | 8835.975 | 8492.35  | 343.625 | 1.040462887 | 0.7427  | -1.031 |
| 101462_r_at | 151.2  | 262.2   | 213.6  | 187.5  | 249.2  | 277    | 229.4  | 186.8  | 0.330310049  | 203.625  | 235.6    | 31.975  | 0.864282683 | 0.3166  | 1.168  |
| 101463_at   | 18.9   | 28.9    | 29.7   | 20.5   | 59.9   | 55.3   | 59.6   | 58     | 0.000441926  | 24.5     | 58.2     | 33.7    | 0.420962199 | 0.00029 | 2.423  |
| 101464_at   | 1953.2 | 1784    | 1401.2 | 1304.3 | 1682.7 | 1973.8 | 1085.8 | 1449.1 | 0.804865285  | 1610.675 | 1547.85  | 62.825  | 1.040588558 | 0.7668  | -1.051 |
| 101465_at   | 82.2   | 109.8   | 137.1  | 146.8  | 143.3  | 95.6   | 109.3  | 116.2  | 0.876728335  | 118.975  | 116.1    | 2.875   | 1.024763135 | 0.9467  | 1.011  |
| 101466_at   | 174.1  | 158.8   | 150.7  | 146.3  | 202.7  | 277.1  | 158.8  | 227.7  | 0.093238916  | 157.475  | 216.575  | 59.1    | 0.727115318 | 0.04926 | 1.351  |
| 101467_at   | 120.1  | 117.8   | 133.2  | 134.9  | 124.3  | 182.7  | 200.5  | 164.7  | 0.080176185  | 126.5    | 168.05   | 41.55   | 0.752752157 | 0.04782 | 1.311  |
| 101468_at   | 50.1   | 42.2    | 38.9   | 64     | 59.1   | 75.7   | 48.5   | 54.1   | 0.240528775  | 48.8     | 59.35    | 10.55   | 0.822240944 | 0.2165  | 1.222  |
| 101469_at   | 1347.2 | 1326.1  | 1192.2 | 1028.4 | 1082.2 | 1380.7 | 1228.1 | 1060   | 0.74424696   | 1223.475 | 1187.75  | 35.725  | 1.030077878 | 0.7456  | -1.03  |
| 101470_at   | 89.2   | 51.4    | 45.3   | 92.8   | 68.2   | 99.1   | 79.1   | 75.3   | 0.48184237   | 69.675   | 80.425   | 10.75   | 0.866335095 | 0.3958  | 1.202  |
| 101471_at   | 37.2   | 14      | 16     | 16.4   | 19.5   | 35.8   | 29.3   | 12.3   | 0.674621022  | 20.9     | 24.225   | 3.325   | 0.862745098 | 0.6515  | 1.167  |
| 101472_s_at | 144.6  | 34.9    | 115.5  | 26.7   | 121.9  | 50.9   | 85.6   | 177.2  | 0.501815035  | 80.425   | 108.9    | 28.475  | 0.738521579 | 0.4028  | 1.567  |
| 101473_at   | 116.9  | 94      | 26.8   | 67.6   | 64.4   | 33.4   | 93.3   | 30.4   | 0.424754312  | 76.325   | 55.375   | 20.95   | 1.378329571 | 0.5081  | -1.345 |
| 101474_at   | 14.4   | 26.3    | 24.5   | 22.1   | 11.3   | 18.2   | 28.7   | 19.9   | 0.624294764  | 21.825   | 19.525   | 2.3     | 1.117797695 | 0.5701  | -1.151 |
| 101475_at   | 1226.9 | 1368.7  | 1641.6 | 1467.1 | 1376.2 | 1409   | 1350   | 1364.5 | 0.600471259  | 1426.075 | 1374.925 | 51.15   | 1.037202029 | 0.6332  | 1.032  |
| 101476_at   | 1922.6 | 1809.5  | 2290.4 | 2294.9 | 1791.5 | 2136.8 | 1707.9 | 1997.7 | 0.325487588  | 2079.35  | 1908.475 | 170.875 | 1.089534838 | 0.3298  | -1.088 |
| 101480_at   | 239.7  | 243.5   | 254.6  | 289.7  | 246.3  | 281    | 198.6  | 244.8  | 0.515608901  | 256.875  | 242.675  | 14.2    | 1.058514474 | 0.4884  | -1.064 |
| 101481_at   | 712    | 719.7   | 835.7  | 717    | 754.2  | 702.1  | 687.3  | 676.1  | 0.288750985  | 746.1    | 704.925  | 41.175  | 1.058410469 | 0.2694  | -1.057 |
| 101482_at   | 1840.2 | 2195.6  | 2577   | 2925.2 | 2291.5 | 2075.2 | 2662.9 | 2640.6 | 0.908916488  | 2384.5   | 2417.55  | 33.05   | 0.986329135 | 0.8484  | 1.024  |
| 101483_at   | 1364.7 | 1418.3  | 1217.2 | 1030   | 1396   | 1378.1 | 1066.3 | 1073   | 0.824971051  | 1257.55  | 1228.35  | 29.2    | 1.023771726 | 0.8218  | 1.025  |
| 101484_at   | 1739.4 | 1441.6  | 1263.9 | 1620.6 | 1609.2 | 1114.6 | 1696.3 | 1409.2 | 0.734451791  | 1516.375 | 1457.325 | 59.05   | 1.040519445 | 0.7126  | -1.046 |
| 101485_at   | 3359.5 | 3381.4  | 3031.6 | 2766.1 | 3335.7 | 2659.9 | 1904.3 | 2794.9 | 0.228307485  | 3134.65  | 2673.7   | 460.95  | 1.172401541 | 0.2145  | -1.192 |
| 101486_at   | 639.9  | 598.3   | 430.1  | 424.4  | 610.4  | 699.2  | 565.5  | 604.9  | 0.190836769  | 523.175  | 620      | 96.825  | 0.843830645 | 0.1653  | 1.202  |
| 101487_f_at | 9054.9 | 8661.6  | 8568.7 | 8730.6 | 7674.5 | 7182.9 | 9767.7 | 9728.1 | 0.823882894  | 8753.95  | 8588.3   | 165.65  | 1.019287868 | 0.737   | -1.029 |
| 101488_r_at | 84.1   | 32.4    | 47.5   | 69     | 41.8   | 61.4   | 50.1   | 31.7   | 0.40281232   | 58.25    | 46.25    | 12      | 1.259459459 | 0.4678  | -1.217 |
| 101489_at   | 1837.2 | 1765.5  | 2487.8 | 1958.5 | 2284.2 | 1977.3 | 2433.4 | 2257.3 | 0.287892958  | 2012.25  | 2238.05  | 225.8   | 0.899108599 | 0.2492  | 1.119  |
| 101490_at   | 1292.5 | 1565.1  | 1707.3 | 1458.4 | 1669   | 1511.8 | 1602.9 | 1591.4 | 0.401580372  | 1505.825 | 1593.775 | 87.95   | 0.944816552 | 0.3627  | 1.063  |
| 101492_at   | 304.8  | 327.4   | 296.6  | 283.9  | 289.3  | 276.3  | 283.8  | 299.5  | 0.189868626  | 303.175  | 287.225  | 15.95   | 1.055531378 | 0.1726  | -1.055 |
| 101493_at   | 55.5   | 43.3    | 15.3   | 17.8   | 47.6   | 67.2   | 46.3   | 11.4   | 0.52980137   | 32.975   | 43.125   | 10.15   | 0.764637681 | 0.6539  | 1.27   |
| 101494_at   | 136.3  | 111.1   | 98.1   | 197.2  | 227.9  | 224.5  | 95.4   | 132.9  | 0.424849423  | 135.675  | 170.175  | 34.5    | 0.797267519 | 0.476   | 1.22   |
| 101495_at   | 4922.6 | 4548.8  | 4279.4 | 3951.5 | 4127.3 | 4087.3 | 5237.4 | 5046.3 | 0.607659492  | 4425.575 | 4624.575 | 199     | 0.956969019 | 0.6287  | 1.042  |
| 101498_at   | 686    | 1096.2  | 805    | 800.7  | 638.6  | 754.3  | 632.7  | 861    | 0.2777776607 | 846.975  | 721.65   | 125.325 | 1.173664519 | 0.258   | -1.166 |
| 101499_at   | 1747.4 | 1985.1  | 1494.1 | 1694.7 | 1674.4 | 1401.5 | 1759.7 | 1737.1 | 0.529728161  | 1730.325 | 1643.175 | 87.15   | 1.053037564 | 0.5435  | -1.052 |
| 101500_at   | 547.4  | 364.3   | 369.4  | 429.6  | 378.6  | 562    | 469.9  | 410.5  | 0.654737928  | 427.675  | 455.25   | 27.575  | 0.939428885 | 0.63    | 1.067  |
| 101501_r_at | 52.7   | 88      | 90.7   | 45.2   | 85     | 134.2  | 172.8  | 88.7   | 0.088911559  | 69.15    | 120.175  | 51.025  | 0.575410859 | 0.06505 | 1.741  |
| 101502_at   | 1466.9 | 1384.3  | 2013.6 | 2525.9 | 1373.8 | 1276.3 | 1618.7 | 1783.4 | 0.310978797  | 1847.675 | 1513.05  | 334.625 | 1.221159248 | 0.3082  | -1.195 |
| 101503_at   | 301.5  | 281.6   | 355.3  | 342.4  | 192.1  | 254.8  | 390.9  | 350.8  | 0.659358531  | 320.2    | 297.15   | 23.05   | 1.077570251 | 0.5499  | -1.114 |
| 101505_at   | 927.8  | 898     | 954.8  | 812.6  | 800.6  | 891.7  | 820.1  | 1042.4 | 0.885034978  | 898.3    | 888.7    | 9.6     | 1.010802295 | 0.8419  | 1.015  |
| 101506_at   | 489.4  | 575     | 698.5  | 729.6  | 699.8  | 619.6  | 707.6  | 710.5  | 0.364917476  | 623.125  | 684.375  | 61.25   | 0.910502283 | 0.3259  | 1.11   |
| 101507_at   | 318.3  | 316.6   | 279.3  | 267    | 314.7  | 250.7  | 297.4  | 260.6  | 0.496798245  | 295.3    | 280.85   | 14.45   | 1.051450952 | 0.488   | -1.053 |
| 101508_at   | 252.1  | 661.1   | 168.1  | 246.7  | 220.5  | 339.2  | 472.1  | 485.1  | 0.727408057  | 332      | 379.225  | 47.225  | 0.875469708 | 0.5352  | 1.255  |
| 101509_at   | 2776.1 | 3156.1  | 3246.4 | 2810.5 | 3518.1 | 3143.3 | 3493.2 | 2932.3 | 0.190722766  | 2997.275 | 3271.725 | 274.45  | 0.916114588 | 0.192   | 1.091  |
| 101510_at   | 2828.6 | 3190.4  | 2096.4 | 1844.6 | 3001.9 | 2456   | 1994.8 | 2100.5 | 0.802227127  | 2490     | 2388.3   | 101.7   | 1.04258259  | 0.8525  | -1.031 |
| 101511_at   | 22.1   | 14.3    | 1.4    | 3.8    | 10.1   | 16.9   | 3.7    | 7.6    | 0.887776677  | 10.4     | 9.575    | 0.825   | 1.08616188  | 0.7169  | 1.31   |
| 101513_at   | 131.3  | 81.3    | 66.4   | 93.2   | 57.7   | 148.7  | 84.5   | 72     | 0.927606155  | 93.05    | 90.725   | 2.325   | 1.025626894 | 0.821   | -1.06  |
| 101514_at   | 1099.6 | 1002.8  | 1069.5 | 1134.5 | 1017.2 | 1170.2 | 1222.7 | 1037.1 | 0.568558708  | 1076.6   | 1111.8   | 35.2    | 0.968339629 | 0.5844  | 1.031  |
| 101515_at   | 172.1  | 213.1   | 144.6  | 203    | 168.9  | 188.4  | 158.3  | 150.1  | 0.38834814   | 183.2    | 166.425  | 16.775  | 1.100796154 | 0.4138  | -1.092 |
| 101516_at   | 656.7  | 657.8   | 652.7  | 567.5  | 695.7  | 720.5  | 671.4  | 655.7  | 0.102397649  | 633.675  | 685.825  | 52.15   | 0.923960194 | 0.1016  | 1.084  |
| 101517_at   | 797.1  | 805.1   | 813.1  | 589.4  | 826.5  | 769.6  | 661.2  | 629.5  | 0.692753366  | 751.175  | 721.7    | 29.475  | 1.04084107  | 0.7227  | -1.038 |
| 101518_at   | 358.2  | 426.2   | 425.2  | 445.6  | 465.4  | 546    | 418.4  | 404.4  | 0.284058722  | 413.8    | 458.55   | 44.75   | 0.90240977  | 0.2775  | 1.104  |
| 101519_at   | 2810.6 | 3241.3  | 2909.1 | 2542   | 3525.3 | 2745.6 | 2971.2 | 2918.3 | 0.487940437  | 2875.75  | 3040.1   | 164.35  | 0.945939278 | 0.4822  | 1.056  |
| 101520_at   | 388.4  | 346.3   | 463.5  | 483.8  | 392.3  | 373.9  | 509.2  | 456.2  | 0.790404821  | 420.5    | 432.9    | 12.4    | 0.971355971 | 0.7813  | 1.031  |
| 101521_at   | 637.5  | 771.7   | 660.3  | 670.2  | 754.9  | 539.4  | 755.2  | 671.4  | 0.939655072  | 684.925  | 680.225  | 4.7     | 1.006909478 | 0.8878  | 1.013  |



|             |         |         |         |         |         |         |         |         |             |           |           |         |             |          |        |
|-------------|---------|---------|---------|---------|---------|---------|---------|---------|-------------|-----------|-----------|---------|-------------|----------|--------|
| 101522_at   | 44      | 39.7    | 40.3    | 27.3    | 47.2    | 67      | 42.8    | 37.4    | 0.208662222 | 37.825    | 48.6      | 10.775  | 0.778292181 | 0.19     | 1.273  |
| 101523_at   | 6392.3  | 6648.1  | 6555.6  | 6995.1  | 6820.2  | 6011.4  | 6873    | 7032.3  | 0.895036785 | 6647.775  | 6684.225  | 36.45   | 0.994546862 | 0.9207   | 1.004  |
| 101524_at   | 147.1   | 124.7   | 198.9   | 189.8   | 134.4   | 209     | 318.6   | 234.9   | 0.227194392 | 165.125   | 224.225   | 59.1    | 0.736425465 | 0.2341   | 1.32   |
| 101525_at   | 2276.2  | 2518.3  | 1897.5  | 1587.7  | 2000.9  | 2017.4  | 1575.6  | 1896.4  | 0.434096729 | 2069.925  | 1872.575  | 197.35  | 1.105389637 | 0.4719   | -1.094 |
| 101526_at   | 111.8   | 116.2   | 94.1    | 97.5    | 122.5   | 116.7   | 63.7    | 133.8   | 0.808980826 | 104.9     | 109.175   | 4.275   | 0.960842684 | 0.9745   | 1.006  |
| 101527_at   | 2004.7  | 2240.4  | 2339.1  | 1804.2  | 2393.9  | 2191.4  | 1852.3  | 1954.2  | 0.996194345 | 2097.1    | 2097.95   | 0.85    | 0.999594843 | 0.9958   | 1      |
| 101528_at   | 1152.7  | 1309.5  | 1503.8  | 1129.5  | 1206.7  | 1363.4  | 1222.1  | 1123.8  | 0.672345689 | 1273.875  | 1229      | 44.875  | 1.036513426 | 0.6969   | -1.032 |
| 101529_g_at | 857.8   | 879.4   | 1003.5  | 884.6   | 730.6   | 917     | 980.1   | 845     | 0.570309533 | 906.325   | 868.175   | 38.15   | 1.043942753 | 0.54     | -1.048 |
| 101530_at   | 1211.5  | 1122.5  | 1128.6  | 1035.1  | 1089.3  | 822.9   | 960.9   | 960.7   | 0.049769544 | 1124.425  | 958.45    | 165.975 | 1.173170223 | 0.04793  | -1.177 |
| 101531_at   | 87.8    | 75.1    | 52.6    | 41      | 88      | 82.2    | 22      | 47.1    | 0.82753689  | 64.125    | 59.825    | 4.3     | 1.071876306 | 0.6768   | -1.173 |
| 101532_g_at | 19      | 28.9    | 17      | 16.9    | 13      | 29.1    | 33.6    | 31.5    | 0.300326206 | 20.45     | 26.8      | 6.35    | 0.763059701 | 0.3939   | 1.264  |
| 101534_at   | 58.6    | 46.4    | 41.8    | 35.8    | 37.5    | 53.4    | 41      | 34.6    | 0.550748053 | 45.65     | 41.625    | 4.025   | 1.096696697 | 0.5461   | -1.094 |
| 101536_at   | 628.5   | 706.6   | 716.8   | 742.9   | 544.8   | 987.4   | 660.2   | 718.5   | 0.781996935 | 698.7     | 727.725   | 29.025  | 0.960115428 | 0.8879   | 1.019  |
| 101537_at   | 26.8    | 7.7     | 13.9    | 13.6    | 8.5     | 13.6    | 3.9     | 4.4     | 0.151177862 | 15.5      | 7.6       | 7.9     | 2.039473684 | 0.1032   | -2.105 |
| 101538_i_at | 16.8    | 47.2    | 6       | 7.1     | 32      | 43.3    | 6.6     | 14.2    | 0.722194638 | 19.275    | 24.025    | 4.75    | 0.802289282 | 0.614    | 1.403  |
| 101539_f_at | 12      | 23.3    | 38.2    | 6.6     | 33.9    | 23.9    | 18.3    | 43.5    | 0.313237034 | 20.025    | 29.9      | 9.875   | 0.669732441 | 0.2436   | 1.739  |
| 101540_at   | 1116.4  | 854.8   | 768.9   | 934.6   | 921.9   | 934.6   | 878.7   | 803.7   | 0.692617568 | 918.675   | 884.725   | 33.95   | 1.038373506 | 0.74     | -1.03  |
| 101541_at   | 77.2    | 24.8    | 37.5    | 18.9    | 18.5    | 116     | 44.8    | 46.7    | 0.522910283 | 39.6      | 56.5      | 16.9    | 0.700884956 | 0.5606   | 1.347  |
| 101542_f_at | 2218.3  | 2687.7  | 2512.6  | 2732.8  | 2444.1  | 2573.8  | 2961.7  | 2815.8  | 0.36674029  | 2537.85   | 2698.85   | 161     | 0.940344962 | 0.3715   | 1.064  |
| 101543_f_at | 19069.6 | 18031.2 | 12685.2 | 14097.6 | 15750.5 | 15933.4 | 16883.5 | 15317.8 | 0.999811064 | 15970.9   | 15971.3   | 0.4     | 0.999974955 | 0.8967   | 1.014  |
| 101546_at   | 90.6    | 86.8    | 67      | 108.2   | 36.2    | 76.9    | 65.8    | 94.7    | 0.239089976 | 88.15     | 68.4      | 19.75   | 1.28874269  | 0.2422   | -1.346 |
| 101548_at   | 85.1    | 88.5    | 101.1   | 88.9    | 69.9    | 94.2    | 101.9   | 94.5    | 0.925235453 | 90.9      | 90.125    | 0.775   | 1.008599168 | 0.8632   | 1.017  |
| 101550_at   | 1.8     | 0.8     | 0.9     | 3.4     | 2.9     | 9       | 9.5     | 10.9    | 0.03114912  | 1.725     | 8.075     | 6.35    | 0.213622291 | 0.0125   | 5.005  |
| 101551_s_at | 72.8    | 119.4   | 95.3    | 69.8    | 157.8   | 182.1   | 152.7   | 110.9   | 0.018239838 | 89.325    | 150.875   | 61.55   | 0.592046396 | 0.01718  | 1.703  |
| 101552_at   | 58.3    | 45      | 36.2    | 60.9    | 43.1    | 69.1    | 40.5    | 62.3    | 0.703740981 | 50.1      | 53.75     | 3.65    | 0.932093023 | 0.7287   | 1.067  |
| 101553_at   | 18.7    | 40.3    | 10.5    | 12      | 24.5    | 20.2    | 31.8    | 44.5    | 0.301937826 | 20.375    | 30.25     | 9.875   | 0.673553719 | 0.2014   | 1.648  |
| 101554_at   | 2331.2  | 2235    | 1324.7  | 1020.6  | 1322.4  | 1051.7  | 849.7   | 935.4   | 0.123303134 | 1727.875  | 1039.8    | 688.075 | 1.661737834 | 0.08358  | -1.589 |
| 101555_at   | 4344.7  | 4490    | 6079.8  | 6291.6  | 4493.5  | 4087    | 6372.7  | 5788.2  | 0.880832275 | 5301.525  | 5185.35   | 116.175 | 1.022404466 | 0.8712   | 1.024  |
| 101557_at   | 1787.9  | 1374.6  | 1370    | 1124.8  | 1298.9  | 1638.9  | 1221.4  | 1344    | 0.824332353 | 1414.325  | 1375.8    | 38.525  | 1.02800189  | 0.8661   | -1.02  |
| 101558_s_at | 3282.4  | 3248.4  | 3659.4  | 2889.2  | 3352.2  | 3393.9  | 3033.2  | 2582.5  | 0.492084232 | 3269.85   | 3090.45   | 179.4   | 1.058049799 | 0.4876   | -1.061 |
| 101560_at   | 319.4   | 305.5   | 205.9   | 214     | 65.7    | 160.6   | 93.7    | 101.5   | 0.006612905 | 261.2     | 105.375   | 155.825 | 2.478766311 | 0.004931 | -2.559 |
| 101561_at   | 1562    | 2276.9  | 2730.8  | 2358.5  | 4129.9  | 3958.4  | 2965    | 3151.5  | 0.013670025 | 2232.05   | 3551.2    | 1319.15 | 0.628534017 | 0.01681  | 1.607  |
| 101562_at   | 486.1   | 434.3   | 473.5   | 427     | 432.5   | 420.4   | 489.6   | 456.3   | 0.801658525 | 455.225   | 449.7     | 5.525   | 1.012285968 | 0.7981   | -1.012 |
| 101564_at   | 195.1   | 159.7   | 240.1   | 332.5   | 152.1   | 234.7   | 314.7   | 264.6   | 0.854631082 | 231.85    | 241.525   | 9.675   | 0.959942035 | 0.8467   | 1.045  |
| 101565_f_at | 148.3   | 160.8   | 121.2   | 194.7   | 130.1   | 227.5   | 180.2   | 138.5   | 0.654345239 | 156.25    | 169.075   | 12.825  | 0.924146089 | 0.6887   | 1.07   |
| 101566_f_at | 3.4     | 3.5     | 0.7     | 2.8     | 2.8     | 2.1     | 2.2     | 2.8     | 0.864043563 | 2.6       | 2.475     | 0.125   | 1.050505051 | 0.8091   | 1.101  |
| 101567_at   | 167.9   | 124.2   | 86.2    | 154.9   | 108.8   | 166.1   | 125     | 98.9    | 0.726870174 | 133.3     | 124.7     | 8.6     | 1.068965517 | 0.7789   | -1.057 |
| 101568_at   | 401.8   | 368.8   | 387.8   | 368     | 396.4   | 441.5   | 453.5   | 415.9   | 0.030255719 | 381.6     | 426.825   | 45.225  | 0.894043226 | 0.02348  | 1.118  |
| 101569_at   | 71.4    | 152.7   | 120.8   | 112     | 154.3   | 145.8   | 93.1    | 127.3   | 0.489559035 | 114.225   | 130.125   | 15.9    | 0.877809798 | 0.4762   | 1.16   |
| 101570_at   | 44.2    | 14.9    | 6.1     | 34.6    | 24.5    | 65.2    | 7.5     | 11.6    | 0.892222823 | 24.95     | 27.2      | 2.25    | 0.917279412 | 1        | 1      |
| 101571_g_at | 992.5   | 1187.8  | 1474.7  | 1185.1  | 1029.8  | 1090.1  | 1162.3  | 1182.2  | 0.42629663  | 1210.025  | 1116.1    | 93.925  | 1.084154646 | 0.4371   | -1.075 |
| 101572_f_at | 12.3    | 20.8    | 10.7    | 11.5    | 12.3    | 27      | 29.6    | 18.4    | 0.145326142 | 13.825    | 21.825    | 8       | 0.633447881 | 0.1334   | 1.547  |
| 101573_f_at | 17326.4 | 20575.7 | 13029.6 | 13899.6 | 14555.1 | 14044.4 | 14084.2 | 14448.8 | 0.346468263 | 16207.825 | 14283.125 | 1924.7  | 1.134753424 | 0.3357   | -1.116 |
| 101574_f_at | 52.4    | 57.4    | 12.2    | 57.2    | 60.8    | 22.4    | 63.3    | 65.1    | 0.607601796 | 44.8      | 52.9      | 8.1     | 0.846880907 | 0.6107   | 1.28   |
| 101575_i_at | 122     | 94.4    | 63.1    | 70.7    | 76.5    | 184.6   | 67.9    | 110.9   | 0.488359181 | 87.55     | 109.975   | 22.425  | 0.79609002  | 0.5251   | 1.199  |
| 101576_f_at | 31.7    | 14.4    | 15.8    | 41.4    | 11.2    | 28.9    | 51.6    | 66.7    | 0.370189637 | 25.825    | 39.6      | 13.775  | 0.652146465 | 0.5121   | 1.391  |
| 101577_at   | 22346   | 22169.9 | 13470.9 | 17104.3 | 16947.1 | 18041.6 | 16177.3 | 18347.7 | 0.567550799 | 18772.775 | 17378.425 | 1394.35 | 1.080234544 | 0.6605   | -1.059 |
| 101578_f_at | 1341.6  | 2100.8  | 1165.8  | 1713.8  | 2940.9  | 1730.7  | 1764.5  | 1816.8  | 0.232644651 | 1580.5    | 2063.225  | 482.725 | 0.766033758 | 0.1949   | 1.305  |
| 101579_at   | 1884.9  | 1722.8  | 1772.2  | 1602.9  | 1570.9  | 2178.5  | 1855.8  | 1753.4  | 0.537652446 | 1745.7    | 1839.65   | 93.95   | 0.948930503 | 0.5586   | 1.048  |
| 101580_at   | 1845.3  | 2803    | 1817.5  | 1990.7  | 2502.4  | 2157.2  | 2055.6  | 2196    | 0.675131338 | 2114.125  | 2227.8    | 113.675 | 0.948974324 | 0.5698   | 1.068  |
| 101581_at   | 289.8   | 312.6   | 359.4   | 323.1   | 404.2   | 196.8   | 438.6   | 348.6   | 0.668726135 | 321.225   | 347.05    | 25.825  | 0.925587091 | 0.8522   | 1.037  |
| 101582_at   | 637.2   | 604.7   | 526.7   | 514     | 553.9   | 520.3   | 632.1   | 528.8   | 0.772827888 | 570.65    | 558.775   | 11.875  | 1.021251846 | 0.7807   | -1.02  |
| 101583_at   | 1052.9  | 899.5   | 1135.5  | 1046.2  | 965.7   | 1040.7  | 1094.4  | 993.7   | 0.868314463 | 1033.525  | 1023.625  | 9.9     | 1.009671511 | 0.9011   | 1.007  |
| 101584_at   | 2047.7  | 1899.7  | 1862.1  | 1625.7  | 1823.7  | 2149.1  | 1824    | 1595.1  | 0.942524031 | 1858.8    | 1847.975  | 10.825  | 1.005857763 | 0.9209   | -1.008 |
| 101585_at   | 3954.6  | 3975.8  | 3791.3  | 4029.9  | 3995.2  | 4460.3  | 4891.7  | 4596.9  | 0.056192049 | 3937.9    | 4486.025  | 548.125 | 0.877814992 | 0.02792  | 1.136  |
| 101587_at   | 116.2   | 437     | 375.5   | 342.6   | 539.3   | 439     | 437.3   | 487.8   | 0.105231364 | 317.825   | 475.85    | 158.025 | 0.667910056 | 0.1463   | 1.668  |



|             |        |         |        |        |        |        |         |        |             |          |          |        |             |         |        |
|-------------|--------|---------|--------|--------|--------|--------|---------|--------|-------------|----------|----------|--------|-------------|---------|--------|
| 101588_at   | 62.3   | 44      | 73.4   | 75     | 74.6   | 63.6   | 83.8    | 80.2   | 0.21625648  | 63.675   | 75.55    | 11.875 | 0.842819325 | 0.2227  | 1.206  |
| 101589_at   | 2248.9 | 2350.8  | 3065.8 | 3159   | 2726.6 | 2719.7 | 2964.9  | 3244.7 | 0.474686731 | 2706.125 | 2913.975 | 207.85 | 0.928671317 | 0.4279  | 1.086  |
| 101590_at   | 3157.9 | 3327.1  | 3446.8 | 2945.8 | 3686.6 | 3289.8 | 3798.4  | 3153.6 | 0.219291204 | 3219.4   | 3482.1   | 262.7  | 0.92455702  | 0.2181  | 1.08   |
| 101591_at   | 901.2  | 685.2   | 885.4  | 948.1  | 735.8  | 889.1  | 781     | 713.5  | 0.330169496 | 854.975  | 779.85   | 75.125 | 1.096332628 | 0.3535  | -1.092 |
| 101593_at   | 60.4   | 87.4    | 99.1   | 92.3   | 101    | 151.1  | 141     | 150.4  | 0.014995888 | 84.8     | 135.875  | 51.075 | 0.624103036 | 0.01737 | 1.609  |
| 101595_at   | 123.3  | 78.1    | 63.9   | 106.3  | 77.8   | 186.5  | 86.5    | 96.1   | 0.541481468 | 92.9     | 111.725  | 18.825 | 0.83150593  | 0.5586  | 1.165  |
| 101596_at   | 14     | 16      | 14.8   | 7.4    | 6      | 24.3   | 31.8    | 3.3    | 0.674443052 | 13.05    | 16.35    | 3.3    | 0.798165138 | 0.8426  | -1.127 |
| 101597_at   | 67.9   | 26.4    | 7.8    | 26.4   | 27.5   | 49.3   | 35.2    | 17.1   | 0.992127574 | 32.125   | 32.275   | 0.15   | 0.99535244  | 0.7044  | 1.218  |
| 101598_at   | 21.1   | 22      | 15.5   | 35.8   | 29.5   | 31.7   | 17.6    | 36.7   | 0.407044969 | 23.6     | 28.875   | 5.275  | 0.817316017 | 0.3974  | 1.24   |
| 101599_at   | 20.5   | 29      | 28.8   | 24.6   | 19.2   | 42.3   | 24      | 16.8   | 0.98168593  | 25.725   | 25.575   | 0.15   | 1.005865103 | 0.7841  | -1.065 |
| 101600_at   | 208.4  | 164.6   | 112.8  | 154.9  | 136.2  | 201.5  | 145.9   | 181.6  | 0.814038626 | 160.175  | 166.3    | 6.125  | 0.963168972 | 0.7669  | 1.05   |
| 101601_at   | 31.1   | 43.3    | 23.4   | 22.4   | 8      | 43.8   | 40.3    | 20.6   | 0.855055679 | 30.05    | 28.175   | 1.875  | 1.066548358 | 0.6171  | -1.25  |
| 101602_at   | 246.2  | 276.6   | 183    | 281.6  | 239.7  | 304.7  | 317.1   | 326.3  | 0.146610892 | 246.85   | 296.95   | 50.1   | 0.831284728 | 0.1667  | 1.211  |
| 101603_g_at | 86.5   | 89.8    | 51.2   | 96.2   | 64.2   | 80.2   | 93.9    | 129    | 0.549568173 | 80.925   | 91.825   | 10.9   | 0.881295943 | 0.5753  | 1.13   |
| 101604_at   | 13     | 2.4     | 1.8    | 12.8   | 3      | 20.3   | 16.6    | 4.8    | 0.516288163 | 7.5      | 11.175   | 3.675  | 0.67114094  | 0.5242  | 1.608  |
| 101605_at   | 14     | 5.9     | 9      | 16.7   | 13.8   | 20.4   | 24.6    | 25.7   | 0.036931482 | 11.4     | 21.125   | 9.725  | 0.53964497  | 0.0497  | 1.949  |
| 101606_at   | 103    | 48.9    | 71.1   | 57.5   | 28.9   | 83.6   | 58      | 97.3   | 0.874294757 | 70.125   | 66.95    | 3.175  | 1.04742345  | 0.7545  | -1.109 |
| 101607_at   | 140.8  | 104.9   | 96.4   | 116.1  | 128.4  | 179.2  | 136.3   | 198.2  | 0.065987555 | 114.55   | 160.525  | 45.975 | 0.713596013 | 0.04722 | 1.392  |
| 101608_at   | 22.9   | 10.7    | 5.2    | 11.2   | 5      | 8.8    | 8.5     | 15.7   | 0.521138859 | 12.5     | 9.5      | 3      | 1.315789474 | 0.5774  | -1.253 |
| 101609_at   | 33     | 27.1    | 22     | 26.3   | 35.8   | 41     | 35.1    | 22.2   | 0.223794539 | 27.1     | 33.525   | 6.425  | 0.808351976 | 0.2577  | 1.218  |
| 101610_at   | 10     | 7.1     | 6.9    | 7.4    | 9      | 11.3   | 6.4     | 5.6    | 0.885882531 | 7.85     | 8.075    | 0.225  | 0.972136223 | 0.996   | 1.001  |
| 101611_at   | 83.2   | 49.2    | 52.7   | 33     | 41.4   | 92.7   | 44.1    | 63.2   | 0.725183368 | 54.525   | 60.35    | 5.825  | 0.903479702 | 0.7132  | 1.108  |
| 101612_at   | 16.5   | 10.7    | 13.4   | 37.8   | 10.7   | 16     | 11.7    | 19.5   | 0.478992885 | 19.6     | 14.475   | 5.125  | 1.354058722 | 0.5307  | -1.229 |
| 101613_at   | 101    | 75.1    | 43     | 66.4   | 66.6   | 145.7  | 75.2    | 65     | 0.494276558 | 71.375   | 88.125   | 16.75  | 0.809929078 | 0.479   | 1.217  |
| 101614_at   | 31.5   | 13.6    | 14.2   | 28.9   | 17.2   | 48.4   | 33      | 27     | 0.29476735  | 22.05    | 31.4     | 9.35   | 0.702229299 | 0.2888  | 1.435  |
| 101615_at   | 34.5   | 19.2    | 16.2   | 16.8   | 43.8   | 72.1   | 35.1    | 20.7   | 0.143689334 | 21.675   | 42.925   | 21.25  | 0.504950495 | 0.08886 | 1.887  |
| 101616_at   | 68.9   | 20.8    | 19.1   | 29.2   | 22.5   | 35.7   | 26.5    | 23.5   | 0.575664318 | 34.5     | 27.05    | 7.45   | 1.275415896 | 0.7191  | -1.124 |
| 101617_s_at | 221.7  | 180.2   | 241.7  | 183.5  | 156.6  | 153.6  | 202     | 140.5  | 0.073669725 | 206.775  | 163.175  | 43.6   | 1.267197794 | 0.06568 | -1.269 |
| 101618_r_at | 401.1  | 268.9   | 267.3  | 268.2  | 253.8  | 399.9  | 262.3   | 247    | 0.836833265 | 301.375  | 290.75   | 10.625 | 1.036543422 | 0.7989  | -1.041 |
| 101619_at   | 1.6    | 1.3     | 0.9    | 1.9    | 0.9    | 3.4    | 1.7     | 0.9    | 0.658616622 | 1.425    | 1.725    | 0.3    | 0.826086957 | 0.7835  | 1.106  |
| 101620_at   | 5      | 3.2     | 3.3    | 2      | 1.4    | 2.8    | 3.5     | 3.2    | 0.434535951 | 3.375    | 2.725    | 0.65   | 1.23853211  | 0.4457  | -1.258 |
| 101621_at   | 370.5  | 269.4   | 316.3  | 320.2  | 288.5  | 336.8  | 326.3   | 294.4  | 0.763038421 | 319.1    | 311.5    | 7.6    | 1.024398074 | 0.8006  | -1.02  |
| 101622_at   | 140.6  | 87.8    | 93.5   | 55.2   | 121.1  | 157.2  | 110.7   | 114    | 0.187554425 | 94.275   | 125.75   | 31.475 | 0.749701789 | 0.161   | 1.393  |
| 101623_at   | 105.4  | 65.2    | 57.4   | 96.1   | 103.4  | 97.2   | 110.9   | 105.7  | 0.137882556 | 81.025   | 104.3    | 23.275 | 0.776845638 | 0.1071  | 1.328  |
| 101624_at   | 35.2   | 66.4    | 35.3   | 61.4   | 40.2   | 78.7   | 41.6    | 51.6   | 0.787088087 | 49.575   | 53.025   | 3.45   | 0.934936351 | 0.7649  | 1.075  |
| 101625_at   | 103.3  | 90.8    | 103.3  | 109.5  | 62.1   | 130    | 117.3   | 86.2   | 0.868480781 | 101.725  | 98.9     | 2.825  | 1.028564206 | 0.7126  | -1.068 |
| 101626_at   | 27.4   | 46.3    | 5.4    | 35.3   | 17.3   | 62.2   | 54      | 70.9   | 0.179034821 | 28.6     | 51.1     | 22.5   | 0.559686888 | 0.2678  | 2.033  |
| 101627_at   | 86.4   | 76.2    | 78.5   | 75.8   | 56.3   | 75.5   | 99.9    | 79.2   | 0.880443216 | 79.225   | 77.725   | 1.5    | 1.01929881  | 0.7629  | -1.039 |
| 101628_g_at | 62.4   | 104.4   | 82.8   | 67.4   | 56.9   | 57.8   | 129.4   | 67.9   | 0.952098348 | 79.25    | 78       | 1.25   | 1.016025641 | 0.8078  | -1.059 |
| 101629_s_at | 2.4    | 0.7     | 2.3    | 3      | 2.3    | 1.9    | 1.4     | 3.1    | 0.906335674 | 2.1      | 2.175    | 0.075  | 0.965517241 | 0.7365  | 1.144  |
| 101630_f_at | 84.2   | 18.3    | 36.9   | 50.1   | 49.2   | 75.1   | 66.4    | 76.9   | 0.267304466 | 47.375   | 66.9     | 19.525 | 0.708146487 | 0.2078  | 1.605  |
| 101631_at   | 500.6  | 538.7   | 534.4  | 628    | 422.5  | 444.2  | 544.5   | 644.5  | 0.557915973 | 550.425  | 513.925  | 36.5   | 1.071022036 | 0.4914  | -1.083 |
| 101632_at   | 74.6   | 39.4    | 39.7   | 66.3   | 37.3   | 91     | 84.5    | 72.5   | 0.321843372 | 55       | 71.325   | 16.325 | 0.771118121 | 0.3858  | 1.28   |
| 101633_at   | 19.2   | 53.4    | 19.5   | 10.1   | 41.7   | 17.2   | 18.5    | 12.4   | 0.798815425 | 25.55    | 22.45    | 3.1    | 1.138084633 | 0.9087  | -1.053 |
| 101634_at   | 9286.7 | 10424.2 | 8249.2 | 9057.9 | 9828.9 | 8828.7 | 10128.4 | 9878.6 | 0.473941077 | 9254.5   | 9666.15  | 411.65 | 0.957413241 | 0.4535  | 1.047  |
| 101635_f_at | 15.3   | 54.5    | 15.7   | 55     | 58.9   | 26.7   | 19.4    | 38.6   | 0.958490554 | 35.125   | 35.9     | 0.775  | 0.978412256 | 0.7853  | 1.132  |
| 101636_at   | 6.7    | 23.2    | 5.7    | 23.8   | 17.4   | 22.4   | 16.7    | 38.7   | 0.257913912 | 14.85    | 23.8     | 8.95   | 0.62394958  | 0.2025  | 1.856  |
| 101637_at   | 35.1   | 21      | 44.7   | 26.8   | 27.3   | 28     | 9.6     | 34     | 0.367638653 | 31.9     | 24.725   | 7.175  | 1.290192113 | 0.374   | -1.371 |
| 101638_s_at | 2.7    | 3.8     | 2.6    | 3      | 4.1    | 5.7    | 4.4     | 3.2    | 0.078029367 | 3.025    | 4.35     | 1.325  | 0.695402299 | 0.05238 | 1.427  |
| 101639_r_at | 1.9    | 2.7     | 0.9    | 4.7    | 1.9    | 1.1    | 2.4     | 4.1    | 0.87039719  | 2.55     | 2.375    | 0.175  | 1.073684211 | 0.9471  | -1.031 |
| 101640_f_at | 29.8   | 38.3    | 15.6   | 64     | 28.1   | 28.6   | 31.3    | 28.1   | 0.49433786  | 36.925   | 29.025   | 7.9    | 1.272179156 | 0.7015  | -1.126 |
| 101641_at   | 12.9   | 21      | 14.2   | 15.7   | 17.2   | 28.2   | 27.3    | 21.9   | 0.053365272 | 15.95    | 23.65    | 7.7    | 0.674418605 | 0.04599 | 1.479  |
| 101642_at   | 57.7   | 38.1    | 24.9   | 36.1   | 34.8   | 43.2   | 36.6    | 30.5   | 0.710086537 | 39.2     | 36.275   | 2.925  | 1.080634045 | 0.8348  | -1.042 |
| 101643_at   | 23.5   | 20.3    | 16.3   | 19.7   | 22.1   | 40.6   | 16.9    | 20.9   | 0.405978136 | 19.95    | 25.125   | 5.175  | 0.794029851 | 0.4015  | 1.2    |
| 101644_f_at | 8      | 6.9     | 6.2    | 6.6    | 6.4    | 11.7   | 6.2     | 12.3   | 0.272505952 | 6.925    | 9.15     | 2.225  | 0.756830601 | 0.2726  | 1.263  |
| 101645_f_at | 24.9   | 11.3    | 11.7   | 10.2   | 11.5   | 24.7   | 11.3    | 12.5   | 0.923652759 | 14.525   | 15       | 0.475  | 0.968333333 | 0.8835  | 1.043  |



|             |         |         |         |        |         |         |         |         |             |           |          |         |             |         |        |
|-------------|---------|---------|---------|--------|---------|---------|---------|---------|-------------|-----------|----------|---------|-------------|---------|--------|
| 101646_at   | 38.4    | 22.4    | 23      | 5.6    | 6.7     | 57.2    | 33.8    | 35.2    | 0.416722997 | 22.35     | 33.225   | 10.875  | 0.67268623  | 0.5888  | 1.427  |
| 101647_at   | 78.4    | 18      | 53.9    | 39.2   | 33.1    | 45.4    | 41.7    | 32      | 0.522747492 | 47.375    | 38.05    | 9.325   | 1.245072273 | 0.7687  | -1.105 |
| 101648_at   | 20.1    | 5.5     | 21.1    | 23     | 15.1    | 45.5    | 9       | 18.2    | 0.64013102  | 17.425    | 21.95    | 4.525   | 0.793849658 | 0.7073  | 1.208  |
| 101649_at   | 41.8    | 20.1    | 45.2    | 34     | 9.7     | 17.7    | 27.9    | 30      | 0.105966272 | 35.275    | 21.325   | 13.95   | 1.654161782 | 0.1347  | -1.732 |
| 101650_at   | 129.1   | 113.6   | 96.5    | 65.3   | 97.7    | 164.2   | 83.1    | 116.8   | 0.546310961 | 101.125   | 115.45   | 14.325  | 0.875920312 | 0.5526  | 1.14   |
| 101651_at   | 31.9    | 34.2    | 71.7    | 58.7   | 56.7    | 85.4    | 42.2    | 75.7    | 0.289404081 | 49.125    | 65       | 15.875  | 0.755769231 | 0.2764  | 1.356  |
| 101652_i_at | 6.9     | 6       | 4.4     | 5.4    | 4.4     | 7.6     | 4.6     | 5.1     | 0.793082765 | 5.675     | 5.425    | 0.25    | 1.046082949 | 0.7286  | -1.058 |
| 101653_f_at | 16.9    | 27.2    | 19.1    | 12.4   | 14.9    | 34.4    | 12.9    | 18.2    | 0.843848468 | 18.9      | 20.1     | 1.2     | 0.940298507 | 0.9273  | 1.026  |
| 101654_at   | 6.7     | 7.6     | 3.4     | 3.3    | 3.1     | 4.5     | 2.8     | 5.9     | 0.413655919 | 5.25      | 4.075    | 1.175   | 1.288343558 | 0.4656  | -1.245 |
| 101655_at   | 43.4    | 46.1    | 43.8    | 57     | 39.1    | 43.6    | 50.7    | 54.6    | 0.907177619 | 47.575    | 47       | 0.575   | 1.012234043 | 0.8893  | -1.014 |
| 101656_f_at | 22.9    | 9.9     | 13.6    | 21.6   | 26      | 47.6    | 16.3    | 24.6    | 0.185828719 | 17        | 28.625   | 11.625  | 0.593886463 | 0.1411  | 1.655  |
| 101657_at   | 30.7    | 12.4    | 15      | 21.6   | 38.1    | 22.9    | 17.6    | 14.8    | 0.623710541 | 19.925    | 23.35    | 3.425   | 0.853319058 | 0.6177  | 1.164  |
| 101658_f_at | 53.6    | 49.2    | 34.9    | 55.6   | 34.1    | 59.7    | 52.5    | 112.3   | 0.409112652 | 48.325    | 64.65    | 16.325  | 0.747486466 | 0.4573  | 1.238  |
| 101659_at   | 72.2    | 49.8    | 39.2    | 50.4   | 45.3    | 67.8    | 21.9    | 30.9    | 0.388523505 | 52.9      | 41.475   | 11.425  | 1.275467149 | 0.3048  | -1.361 |
| 101660_at   | 13.3    | 8.6     | 9.9     | 15.4   | 9.5     | 11.1    | 12.3    | 7.9     | 0.421365467 | 11.8      | 10.2     | 1.6     | 1.156862745 | 0.4498  | -1.143 |
| 101661_r_at | 22.3    | 5       | 9.9     | 19.5   | 9.5     | 32.2    | 22.4    | 10      | 0.547218739 | 14.175    | 18.525   | 4.35    | 0.765182186 | 0.5506  | 1.334  |
| 101662_at   | 64.2    | 43.5    | 52.6    | 36.1   | 25.1    | 91.2    | 83.4    | 56.4    | 0.408086467 | 49.1      | 64.025   | 14.925  | 0.766887934 | 0.5984  | 1.194  |
| 101663_s_at | 9       | 16      | 5.9     | 4.6    | 7.9     | 8.2     | 9       | 6.8     | 0.749738315 | 8.875     | 7.975    | 0.9     | 1.112852665 | 0.9915  | 1.003  |
| 101664_at   | 17756.2 | 21438.3 | 13906.2 | 16566  | 17480.2 | 16325.3 | 19370.9 | 19310.6 | 0.703266402 | 17416.675 | 18121.75 | 705.075 | 0.961092334 | 0.636   | 1.05   |
| 101665_at   | 5363.2  | 4910.8  | 5203.7  | 4404.9 | 4519.6  | 4479.7  | 4262.3  | 4340    | 0.068711159 | 4970.65   | 4400.4   | 570.25  | 1.129590492 | 0.03934 | -1.127 |
| 101666_at   | 3.3     | 9.1     | 2.7     | 3      | 3.4     | 6.1     | 4.6     | 5.9     | 0.788284737 | 4.525     | 5        | 0.475   | 0.905       | 0.5293  | 1.232  |
| 101667_at   | 5.4     | 6.7     | 9.6     | 9.2    | 18.3    | 15.9    | 9.2     | 7.1     | 0.163461953 | 7.725     | 12.625   | 4.9     | 0.611881188 | 0.1433  | 1.559  |
| 101668_at   | 75      | 23      | 33.4    | 63.4   | 44.5    | 56.8    | 42.2    | 45.5    | 0.915351673 | 48.7      | 47.25    | 1.45    | 1.030687831 | 0.812   | 1.073  |
| 101669_at   | 45.6    | 23.5    | 19.9    | 8.8    | 30.6    | 10.4    | 41.1    | 22      | 0.881250365 | 24.45     | 26.025   | 1.575   | 0.939481268 | 0.8166  | 1.115  |
| 101670_at   | 56      | 34.2    | 32      | 19.5   | 27.5    | 73.1    | 40.7    | 45.5    | 0.393729251 | 35.425    | 46.7     | 11.275  | 0.75856531  | 0.373   | 1.328  |
| 101671_at   | 18.6    | 6       | 5       | 14.7   | 7.7     | 10.7    | 3.7     | 12.8    | 0.570302255 | 11.075    | 8.725    | 2.35    | 1.269340974 | 0.6768  | -1.205 |
| 101672_at   | 2.7     | 2.8     | 1.5     | 2.1    | 1.4     | 3.5     | 3.1     | 2.6     | 0.521628786 | 2.275     | 2.65     | 0.375   | 0.858490566 | 0.6462  | 1.127  |
| 101673_r_at | 3.3     | 2.1     | 11.2    | 1.4    | 16.6    | 12.7    | 13.2    | 5.9     | 0.054480271 | 4.5       | 12.1     | 7.6     | 0.371900826 | 0.04654 | 3.517  |
| 101674_at   | 42.7    | 25.7    | 4.7     | 20     | 23.3    | 54.5    | 10.2    | 50      | 0.430885087 | 23.275    | 34.5     | 11.225  | 0.674637681 | 0.4831  | 1.58   |
| 101675_at   | 218.6   | 225.3   | 152.9   | 222.8  | 163.5   | 197.5   | 363.8   | 177     | 0.701858549 | 204.9     | 225.45   | 20.55   | 0.908848969 | 0.8021  | 1.055  |
| 101676_at   | 1478.4  | 1802.7  | 1826    | 1432.3 | 1755.9  | 1961.9  | 1385.7  | 1529.8  | 0.891032367 | 1634.85   | 1658.325 | 23.475  | 0.98584415  | 0.9109  | 1.012  |
| 101677_at   | 291     | 179.1   | 161.1   | 194.4  | 198.2   | 280.4   | 265.9   | 204.9   | 0.423285188 | 206.4     | 237.35   | 30.95   | 0.869601854 | 0.3619  | 1.167  |
| 101678_r_at | 550.6   | 588.2   | 292.9   | 754.4  | 366.9   | 619     | 312.1   | 489.9   | 0.432122    | 546.525   | 446.975  | 99.55   | 1.222719391 | 0.4987  | -1.199 |
| 101679_at   | 101.9   | 84.9    | 86      | 43.2   | 80.7    | 88      | 63.6    | 71.1    | 0.828582864 | 79        | 75.85    | 3.15    | 1.041529334 | 1       | 1      |
| 101680_at   | 11960.9 | 14476.4 | 9137.5  | 8504.8 | 10824.6 | 9648.5  | 9150.6  | 9520.1  | 0.442326753 | 11019.9   | 9785.95  | 1233.95 | 1.126094043 | 0.4738  | -1.103 |
| 101681_f_at | 292.7   | 317.3   | 275.3   | 310.8  | 177.1   | 258.6   | 277.1   | 284.5   | 0.135796495 | 299.025   | 249.325  | 49.7    | 1.199338213 | 0.1366  | -1.218 |
| 101682_f_at | 47.4    | 24      | 56.1    | 39.5   | 51.5    | 45.7    | 60.3    | 39.6    | 0.395458607 | 41.75     | 49.275   | 7.525   | 0.847285642 | 0.3662  | 1.221  |
| 101683_at   | 45.2    | 32.3    | 14.7    | 13.9   | 7.1     | 29.4    | 26      | 20.4    | 0.546493887 | 26.525    | 20.725   | 5.8     | 1.279855247 | 0.5892  | -1.283 |
| 101684_r_at | 738.2   | 556.9   | 492.6   | 516.9  | 454.1   | 796.7   | 418.1   | 585.1   | 0.906082835 | 576.15    | 563.5    | 12.65   | 1.02244898  | 0.8144  | -1.043 |
| 101685_f_at | 548.5   | 338.5   | 525.3   | 665.4  | 365.6   | 416.3   | 576.4   | 453.9   | 0.449447206 | 519.425   | 453.05   | 66.375  | 1.146507008 | 0.5044  | -1.13  |
| 101686_at   | 8.1     | 7.1     | 10.6    | 13.7   | 13.9    | 12.8    | 8.1     | 27.3    | 0.270491719 | 9.875     | 15.525   | 5.65    | 0.636070853 | 0.2323  | 1.474  |
| 101687_r_at | 18.7    | 13.2    | 12.7    | 18.7   | 13.6    | 29.8    | 41.2    | 22.1    | 0.160300285 | 15.825    | 26.675   | 10.85   | 0.593252109 | 0.124   | 1.584  |
| 101688_at   | 65.5    | 45.6    | 46.6    | 59.1   | 42      | 103.3   | 56.6    | 67.5    | 0.401543282 | 54.2      | 67.35    | 13.15   | 0.804751299 | 0.4332  | 1.191  |
| 101689_at   | 26.2    | 6       | 7.5     | 6.8    | 6       | 11.5    | 4.8     | 8.4     | 0.485984348 | 11.625    | 7.675    | 3.95    | 1.51465798  | 0.5314  | -1.299 |
| 101690_r_at | 22.5    | 0.6     | 10.9    | 14     | 6.9     | 26.4    | 17.7    | 12.1    | 0.562183167 | 12        | 15.775   | 3.775   | 0.760697306 | 0.4293  | 2.08   |
| 101691_s_at | 7.3     | 17.1    | 18.9    | 18.7   | 11      | 26.9    | 10.6    | 16.7    | 0.870858794 | 15.5      | 16.3     | 0.8     | 0.950920245 | 0.8938  | 1.045  |
| 101692_r_at | 5.2     | 9.3     | 2.8     | 2.2    | 4       | 5.2     | 3.2     | 4.8     | 0.7506862   | 4.875     | 4.3      | 0.575   | 1.13372093  | 0.9622  | 1.017  |
| 101693_f_at | 8.4     | 7.6     | 6.8     | 8.5    | 20.9    | 9.4     | 24.1    | 12      | 0.086766185 | 7.825     | 16.6     | 8.775   | 0.471385542 | 0.02514 | 1.974  |
| 101694_f_at | 181.5   | 91.6    | 99.9    | 135.1  | 86.8    | 189.2   | 153.9   | 123.8   | 0.716087166 | 127.025   | 138.425  | 11.4    | 0.917644934 | 0.7278  | 1.087  |
| 101695_at   | 67      | 19.4    | 64      | 56.9   | 83.8    | 176.2   | 104.7   | 16.3    | 0.284914315 | 51.825    | 95.25    | 43.425  | 0.544094488 | 0.5062  | 1.52   |
| 101696_r_at | 9.2     | 6.8     | 4.8     | 6.3    | 2.8     | 9.9     | 4.9     | 5.3     | 0.575370321 | 6.775     | 5.725    | 1.05    | 1.183406114 | 0.4441  | -1.267 |
| 101697_f_at | 162.7   | 172.5   | 165     | 164.1  | 257.3   | 102.7   | 127.4   | 158.4   | 0.900322328 | 166.075   | 161.45   | 4.625   | 1.02864664  | 0.6726  | -1.091 |
| 101698_f_at | 311.2   | 245.9   | 201.3   | 274.1  | 215.4   | 351     | 218.9   | 204     | 0.805688309 | 258.125   | 247.325  | 10.8    | 1.043667239 | 0.7331  | -1.057 |
| 101699_at   | 16.2    | 26.7    | 1.8     | 15.1   | 9.2     | 18.5    | 16.6    | 3.2     | 0.639675621 | 14.95     | 11.875   | 3.075   | 1.258947368 | 0.927   | -1.071 |
| 101700_at   | 263.4   | 172.6   | 139.5   | 256    | 237.5   | 408.2   | 319.1   | 264.2   | 0.08890001  | 207.875   | 307.25   | 99.375  | 0.676566314 | 0.08397 | 1.498  |
| 101701_at   | 3.7     | 6.8     | 3.1     | 0.9    | 3.6     | 2       | 2       | 1.2     | 0.34031241  | 3.625     | 2.2      | 1.425   | 1.647727273 | 0.4946  | -1.424 |



|             |        |        |        |        |        |        |        |        |             |          |          |         |             |         |        |
|-------------|--------|--------|--------|--------|--------|--------|--------|--------|-------------|----------|----------|---------|-------------|---------|--------|
| 101702_at   | 12.3   | 8.7    | 5.7    | 13.6   | 4.3    | 12.3   | 8.9    | 8      | 0.510494093 | 10.075   | 8.375    | 1.7     | 1.202985075 | 0.5293  | -1.217 |
| 101703_at   | 603.3  | 701.3  | 537.2  | 452.8  | 585.8  | 841.9  | 340.9  | 536.6  | 0.982720854 | 573.65   | 576.3    | 2.65    | 0.995401701 | 0.8793  | -1.033 |
| 101704_at   | 26.2   | 20.8   | 20.1   | 33.4   | 30.2   | 11.5   | 12.9   | 23     | 0.333205916 | 25.125   | 19.4     | 5.725   | 1.295103093 | 0.2677  | -1.372 |
| 101705_at   | 66.7   | 73.5   | 49.6   | 96     | 66.9   | 46.5   | 31.9   | 80.7   | 0.341277633 | 71.45    | 56.5     | 14.95   | 1.26460177  | 0.3195  | -1.306 |
| 101706_at   | 5.8    | 14.3   | 7      | 10     | 6.3    | 8.7    | 12.2   | 7.8    | 0.825925872 | 9.275    | 8.75     | 0.525   | 1.06        | 0.9131  | -1.028 |
| 101707_at   | 136.5  | 170.9  | 199.8  | 224.2  | 180.2  | 213    | 218.1  | 234.7  | 0.251880255 | 182.85   | 211.5    | 28.65   | 0.864539007 | 0.24    | 1.171  |
| 101708_at   | 107.5  | 85.8   | 117.7  | 119.7  | 98.3   | 123.6  | 99.4   | 99.5   | 0.811343514 | 107.675  | 105.2    | 2.475   | 1.023526616 | 0.8425  | 1.02   |
| 101709_at   | 29.7   | 9.5    | 38     | 29.8   | 37.8   | 19.6   | 45.8   | 39.4   | 0.323631173 | 26.75    | 35.65    | 8.9     | 0.750350631 | 0.3627  | 1.432  |
| 101710_at   | 34.8   | 9.1    | 28.6   | 43.8   | 15.7   | 22.8   | 36.4   | 25.2   | 0.655070149 | 29.075   | 25.025   | 4.05    | 1.161838162 | 0.9118  | -1.046 |
| 101711_at   | 28.5   | 35.7   | 20.5   | 17.7   | 31.5   | 48.9   | 10.9   | 34.5   | 0.539836445 | 25.6     | 31.45    | 5.85    | 0.813990461 | 0.7675  | 1.118  |
| 101712_at   | 305.3  | 286.9  | 251.6  | 252.7  | 242.1  | 361.8  | 244.5  | 250.7  | 0.984693563 | 274.125  | 274.775  | 0.65    | 0.997634428 | 0.9348  | 1.009  |
| 101713_at   | 17.6   | 23     | 3.6    | 3.6    | 19.6   | 12.7   | 26     | 18.1   | 0.265168086 | 11.95    | 19.1     | 7.15    | 0.62565445  | 0.1861  | 2.182  |
| 101714_at   | 56.3   | 8.4    | 11.7   | 37.2   | 6      | 10.1   | 7.8    | 28.4   | 0.282319654 | 28.4     | 13.075   | 15.325  | 2.17208413  | 0.2722  | -1.989 |
| 101715_at   | 32.5   | 10.2   | 6.5    | 14.4   | 6.5    | 13.4   | 10.4   | 11.5   | 0.41986768  | 15.9     | 10.45    | 5.45    | 1.5215311   | 0.4934  | -1.314 |
| 101716_at   | 23.9   | 13.3   | 3      | 10.2   | 6.4    | 15.7   | 9.5    | 13.6   | 0.79953916  | 12.6     | 11.3     | 1.3     | 1.115044248 | 0.8856  | 1.075  |
| 101717_at   | 644.5  | 395.2  | 388.2  | 451    | 343.1  | 474.4  | 497.7  | 412.4  | 0.609173843 | 469.725  | 431.9    | 37.825  | 1.087578143 | 0.6342  | -1.075 |
| 101718_f_at | 93.3   | 62.6   | 73.2   | 66.7   | 86.3   | 60     | 93.6   | 114.3  | 0.316860727 | 73.95    | 88.55    | 14.6    | 0.8351214   | 0.3401  | 1.181  |
| 101719_at   | 2936.6 | 2172.4 | 2144.1 | 1343.9 | 1554.6 | 2640.8 | 1463.1 | 1302.6 | 0.39427564  | 2149.25  | 1740.275 | 408.975 | 1.235005962 | 0.379   | -1.238 |
| 101720_f_at | 99.2   | 47.1   | 16.3   | 50.7   | 22.8   | 67.1   | 67.6   | 56.9   | 0.989625356 | 53.325   | 53.6     | 0.275   | 0.994869403 | 0.8242  | 1.111  |
| 101723_r_at | 275.3  | 165.6  | 172.5  | 211.3  | 124.3  | 183.2  | 234.7  | 214.8  | 0.644291399 | 206.175  | 189.25   | 16.925  | 1.089431968 | 0.6297  | -1.097 |
| 101724_at   | 106.2  | 72.7   | 49     | 65.1   | 45.9   | 63.7   | 72.7   | 69.3   | 0.480581349 | 73.25    | 62.9     | 10.35   | 1.1645469   | 0.5261  | -1.137 |
| 101725_at   | 13.8   | 9.8    | 25.7   | 16.7   | 16.1   | 16.2   | 19.1   | 11.8   | 0.858730949 | 16.5     | 15.8     | 0.7     | 1.044303797 | 0.9861  | 1.004  |
| 101726_at   | 9.7    | 11     | 7.4    | 9.5    | 6.3    | 69     | 10.8   | 47.1   | 0.209330516 | 9.4      | 33.3     | 23.9    | 0.282282282 | 0.1955  | 2.326  |
| 101727_at   | 49.7   | 53.3   | 72.1   | 44.5   | 77.6   | 75.7   | 85.4   | 67.6   | 0.027792468 | 54.9     | 76.575   | 21.675  | 0.716944172 | 0.02299 | 1.414  |
| 101728_at   | 186.9  | 214.7  | 160.9  | 156.1  | 179.2  | 197.5  | 201.3  | 141.6  | 0.990031856 | 179.65   | 179.9    | 0.25    | 0.998610339 | 0.9987  | 1      |
| 101729_at   | 10.1   | 6      | 7.8    | 7.1    | 4.9    | 49.2   | 7.7    | 8.6    | 0.420409749 | 7.75     | 17.6     | 9.85    | 0.440340909 | 0.4809  | 1.475  |
| 101730_at   | 68     | 60.9   | 58.7   | 40.1   | 44.8   | 126.1  | 84.1   | 42.2   | 0.452681191 | 56.925   | 74.3     | 17.375  | 0.76615074  | 0.5532  | 1.197  |
| 101731_at   | 4.5    | 1.5    | 3.7    | 6      | 2      | 2.9    | 2      | 15.7   | 0.650359675 | 3.925    | 5.65     | 1.725   | 0.694690265 | 0.9284  | 1.055  |
| 101732_at   | 195.2  | 109.4  | 134.2  | 146.3  | 142.7  | 206.5  | 139.9  | 169.9  | 0.466957962 | 146.275  | 164.75   | 18.475  | 0.887860395 | 0.4278  | 1.137  |
| 101733_at   | 17.5   | 18.8   | 21     | 32.3   | 14.8   | 24.5   | 13.8   | 19.1   | 0.340432688 | 22.4     | 18.05    | 4.35    | 1.24099723  | 0.3072  | -1.236 |
| 101734_at   | 75.8   | 101.4  | 66     | 107.6  | 127.3  | 135.2  | 88.9   | 103.8  | 0.124165305 | 87.7     | 113.8    | 26.1    | 0.770650264 | 0.1285  | 1.306  |
| 101735_f_at | 93.9   | 67.4   | 58.7   | 67     | 76.8   | 69     | 84.3   | 60.9   | 0.917157756 | 71.75    | 72.75    | 1       | 0.986254296 | 0.8611  | 1.023  |
| 101736_at   | 16     | 12.6   | 10     | 12.5   | 43.6   | 10.9   | 44.5   | 12.2   | 0.207724278 | 12.775   | 27.8     | 15.025  | 0.459532374 | 0.1956  | 1.788  |
| 101737_at   | 36     | 33.3   | 34.1   | 51     | 22     | 55.5   | 26.5   | 25.3   | 0.511787807 | 38.6     | 32.325   | 6.275   | 1.194122196 | 0.3514  | -1.262 |
| 101738_at   | 300.1  | 256.2  | 263    | 295.1  | 281.8  | 376.6  | 296.5  | 268.6  | 0.361724967 | 278.6    | 305.875  | 27.275  | 0.910829587 | 0.345   | 1.091  |
| 101739_at   | 22.4   | 26     | 13.9   | 16.5   | 10     | 17.4   | 17.6   | 11.4   | 0.154798482 | 19.7     | 14.1     | 5.6     | 1.397163121 | 0.1503  | -1.4   |
| 101740_at   | 23.9   | 16.2   | 14.9   | 21.3   | 22.7   | 36.6   | 17.5   | 4.9    | 0.855240988 | 19.075   | 20.425   | 1.35    | 0.933904529 | 0.769   | -1.145 |
| 101741_at   | 1874.2 | 2903.2 | 2503.2 | 1958.5 | 2245   | 2231.8 | 2660.3 | 2035.1 | 0.954108231 | 2309.775 | 2293.05  | 16.725  | 1.007293779 | 0.9728  | 1.004  |
| 101742_at   | 18.2   | 16.8   | 10     | 10.8   | 11     | 24.1   | 16     | 15.2   | 0.475813838 | 13.95    | 16.575   | 2.625   | 0.841628959 | 0.4803  | 1.181  |
| 101743_f_at | 102.2  | 80.3   | 43.6   | 75.2   | 64.4   | 97.2   | 49.1   | 94.4   | 0.9568229   | 75.325   | 76.275   | 0.95    | 0.987545067 | 0.94    | 1.019  |
| 101744_i_at | 3.9    | 1.9    | 2.7    | 2.8    | 1.5    | 1.9    | 3.4    | 2.5    | 0.423826683 | 2.825    | 2.325    | 0.5     | 1.215053763 | 0.3453  | -1.26  |
| 101745_f_at | 9.1    | 6.6    | 7.6    | 11.4   | 7.1    | 41.8   | 14.2   | 3.5    | 0.426866627 | 8.675    | 16.65    | 7.975   | 0.521021021 | 0.6401  | 1.304  |
| 101746_i_at | 0.5    | 12.6   | 0.5    | 5.4    | 0.5    | 0.9    | 1.2    | 0.6    | 0.261232374 | 4.75     | 0.8      | 3.95    | 5.9375      | 0.2967  | -2.659 |
| 101747_f_at | 10.8   | 11.1   | 4.5    | 7.5    | 3.3    | 8.9    | 7.3    | 4.8    | 0.27668187  | 8.475    | 6.075    | 2.4     | 1.395061728 | 0.2963  | -1.413 |
| 101748_at   | 236.4  | 198.3  | 198.3  | 189.3  | 168.4  | 205    | 197.1  | 172.5  | 0.202924174 | 205.575  | 185.75   | 19.825  | 1.106729475 | 0.193   | -1.107 |
| 101749_at   | 20.2   | 5.7    | 8.7    | 9      | 0.6    | 4.4    | 2.7    | 12     | 0.192631298 | 10.9     | 4.925    | 5.975   | 2.21319797  | 0.1387  | -3.23  |
| 101751_f_at | 22.7   | 81.5   | 13.3   | 35.5   | 47.8   | 74.2   | 40.1   | 59     | 0.364622317 | 38.25    | 55.275   | 17.025  | 0.691994573 | 0.2123  | 1.761  |
| 101752_f_at | 5.4    | 4.8    | 2.3    | 4.4    | 2.1    | 4.2    | 4.7    | 5.2    | 0.861098897 | 4.225    | 4.05     | 0.175   | 1.043209877 | 0.8615  | -1.053 |
| 101753_s_at | 359.6  | 530    | 354.9  | 265.8  | 478.2  | 447.9  | 497.2  | 353.7  | 0.345260454 | 377.575  | 444.25   | 66.675  | 0.849915588 | 0.2943  | 1.203  |
| 101754_f_at | 664.4  | 621.2  | 533.9  | 546.2  | 545.7  | 682.7  | 539.2  | 694.8  | 0.662752888 | 591.425  | 615.6    | 24.175  | 0.96072937  | 0.6839  | 1.038  |
| 101755_f_at | 128.9  | 237.4  | 263.6  | 268.2  | 187.4  | 288.1  | 259.7  | 242.2  | 0.631216154 | 224.525  | 244.35   | 19.825  | 0.91886638  | 0.5875  | 1.119  |
| 101756_f_at | 305.8  | 161.8  | 135.6  | 123    | 158.4  | 309.5  | 140.4  | 160.9  | 0.858338062 | 181.55   | 192.3    | 10.75   | 0.944097764 | 0.7962  | 1.076  |
| 101757_at   | 296.3  | 279.3  | 450.9  | 394.7  | 190.6  | 307.5  | 482.6  | 284.1  | 0.615714334 | 355.3    | 316.2    | 39.1    | 1.123655914 | 0.5208  | -1.164 |
| 101758_at   | 23.3   | 22.1   | 15.1   | 15.1   | 16.7   | 44.4   | 21.5   | 20.8   | 0.358907188 | 18.9     | 25.85    | 6.95    | 0.731141199 | 0.3264  | 1.296  |
| 101759_at   | 33     | 32.1   | 42.1   | 36.7   | 59.2   | 67.3   | 33.8   | 61.2   | 0.073896317 | 35.975   | 55.375   | 19.4    | 0.6496614   | 0.05242 | 1.499  |
| 101760_at   | 12.8   | 13.7   | 9.1    | 11.3   | 9.7    | 16.2   | 5.5    | 10.4   | 0.624854088 | 11.725   | 10.45    | 1.275   | 1.122009569 | 0.4866  | -1.194 |



|             |        |        |        |        |        |        |        |        |             |          |          |         |             |          |        |
|-------------|--------|--------|--------|--------|--------|--------|--------|--------|-------------|----------|----------|---------|-------------|----------|--------|
| 101761_f_at | 34.4   | 27.1   | 29.7   | 33.8   | 26.3   | 43.4   | 29.5   | 37.2   | 0.535487837 | 31.25    | 34.1     | 2.85    | 0.916422287 | 0.5791   | 1.077  |
| 101762_at   | 18.9   | 45.8   | 25.9   | 13.5   | 54.1   | 18.8   | 13.5   | 29.4   | 0.807367658 | 26.025   | 28.95    | 2.925   | 0.898963731 | 0.8633   | 1.074  |
| 101763_at   | 649.7  | 655.8  | 611.9  | 637.5  | 576.1  | 773.1  | 679.5  | 644.7  | 0.527877755 | 638.725  | 668.35   | 29.625  | 0.955674422 | 0.5479   | 1.041  |
| 101764_at   | 230.4  | 191    | 178.6  | 229    | 178.6  | 243.2  | 214.8  | 222.3  | 0.70552686  | 207.25   | 214.725  | 7.475   | 0.965188031 | 0.7115   | 1.036  |
| 101765_at   | 1044.1 | 1164.7 | 1383.2 | 1058.4 | 1064.4 | 1134.6 | 709.9  | 704.7  | 0.116564982 | 1162.6   | 903.4    | 259.2   | 1.286916095 | 0.1084   | -1.31  |
| 101768_at   | 10     | 11.3   | 8.3    | 6.7    | 3.9    | 12.6   | 8.4    | 8.5    | 0.737578515 | 9.075    | 8.35     | 0.725   | 1.086826347 | 0.6075   | -1.157 |
| 101769_at   | 149    | 147.3  | 86.4   | 117.4  | 106.6  | 164.3  | 149.6  | 170.8  | 0.312118475 | 125.025  | 147.825  | 22.8    | 0.845763572 | 0.3355   | 1.191  |
| 101770_i_at | 4      | 5.7    | 2.5    | 5.1    | 2.2    | 5.3    | 2.1    | 4.7    | 0.517487687 | 4.325    | 3.575    | 0.75    | 1.20979021  | 0.4929   | -1.249 |
| 101771_r_at | 407.8  | 460.9  | 644.7  | 687    | 352.7  | 667.6  | 588    | 452.9  | 0.734077834 | 550.1    | 515.3    | 34.8    | 1.067533476 | 0.7225   | -1.073 |
| 101772_r_at | 144.1  | 99.8   | 89.1   | 76.3   | 116.4  | 108.2  | 78.8   | 148.7  | 0.621746405 | 102.325  | 113.025  | 10.7    | 0.905330679 | 0.605    | 1.108  |
| 101773_r_at | 142    | 117.7  | 114.5  | 134    | 125.6  | 195    | 155.1  | 111.7  | 0.372171637 | 127.05   | 146.85   | 19.8    | 0.865168539 | 0.3798   | 1.134  |
| 101774_at   | 73.4   | 85.9   | 147.3  | 112.6  | 34.7   | 69.1   | 104.3  | 40.9   | 0.111349034 | 104.8    | 62.25    | 42.55   | 1.683534137 | 0.09574  | -1.789 |
| 101775_at   | 78.5   | 35.3   | 27.3   | 41.2   | 34.6   | 68.4   | 21.4   | 65     | 0.916114004 | 45.575   | 47.35    | 1.775   | 0.9625132   | 0.9734   | 1.012  |
| 101776_at   | 7.5    | 7.3    | 4.2    | 11     | 5.1    | 7.9    | 8.4    | 5.5    | 0.652987183 | 7.5      | 6.725    | 0.775   | 1.115241636 | 0.7639   | -1.077 |
| 101777_at   | 20.2   | 10.9   | 21.9   | 19.8   | 6.1    | 13.5   | 20.6   | 13.9   | 0.272829779 | 18.2     | 13.525   | 4.675   | 1.345656192 | 0.2911   | -1.418 |
| 101778_at   | 169.3  | 115.3  | 119.1  | 124.6  | 124.6  | 215.4  | 98.4   | 136.9  | 0.695725099 | 132.075  | 143.825  | 11.75   | 0.918303494 | 0.7757   | 1.057  |
| 101779_at   | 26.4   | 20.1   | 35.9   | 20.4   | 44.8   | 31.3   | 43.4   | 11.9   | 0.442237186 | 25.7     | 32.85    | 7.15    | 0.782343988 | 0.6645   | 1.167  |
| 101780_at   | 5.3    | 3.6    | 6.3    | 3.3    | 2.4    | 4.3    | 6.7    | 2.8    | 0.651745478 | 4.625    | 4.05     | 0.575   | 1.141975309 | 0.5298   | -1.205 |
| 101781_f_at | 1271.1 | 1301.7 | 1168   | 1167.1 | 1467.7 | 1481.5 | 1429.2 | 1313.4 | 0.009197726 | 1226.975 | 1422.95  | 195.975 | 0.862275554 | 0.009407 | 1.16   |
| 101782_at   | 20.9   | 3.4    | 12     | 2      | 8.7    | 5.5    | 8.5    | 13.6   | 0.920317859 | 9.575    | 9.075    | 0.5     | 1.055096419 | 0.6279   | 1.341  |
| 101783_i_at | 13.7   | 6.7    | 7.1    | 8.5    | 9.1    | 21.1   | 6.6    | 11.5   | 0.431407796 | 9        | 12.075   | 3.075   | 0.745341615 | 0.4427   | 1.274  |
| 101784_f_at | 17     | 18     | 8.2    | 14.2   | 13.8   | 22.1   | 15.5   | 12.5   | 0.615055359 | 14.35    | 15.975   | 1.625   | 0.89827856  | 0.5844   | 1.135  |
| 101786_at   | 7.1    | 16     | 11.9   | 34.3   | 20.1   | 31.5   | 6.4    | 12.7   | 0.966639789 | 17.325   | 17.675   | 0.35    | 0.98019802  | 0.9567   | 1.027  |
| 101787_f_at | 1873.7 | 2438.8 | 1727.3 | 2603.4 | 2706.4 | 1730.5 | 2682.7 | 2493.3 | 0.467937515 | 2160.8   | 2403.225 | 242.425 | 0.899125134 | 0.4955   | 1.111  |
| 101788_f_at | 34.2   | 15.3   | 15     | 32.9   | 13     | 24.3   | 16.7   | 15     | 0.28915239  | 24.35    | 17.25    | 7.1     | 1.411594203 | 0.3078   | -1.345 |
| 101789_i_at | 53.2   | 24.7   | 28     | 54.4   | 42.1   | 67.3   | 50.5   | 51.3   | 0.23762298  | 40.075   | 52.8     | 12.725  | 0.758996212 | 0.2068   | 1.384  |
| 101790_f_at | 31.8   | 35.6   | 31.1   | 40.6   | 24.5   | 51.2   | 35.6   | 32.6   | 0.851492533 | 34.775   | 35.975   | 1.2     | 0.966643502 | 0.9784   | 1.005  |
| 101791_f_at | 268.9  | 147.1  | 187.9  | 175.4  | 108.1  | 198.8  | 133.5  | 132.6  | 0.1683187   | 194.825  | 143.25   | 51.575  | 1.360034904 | 0.1374   | -1.361 |
| 101792_at   | 13.2   | 3.7    | 11.2   | 12.3   | 14.2   | 5.3    | 19.8   | 14     | 0.419849387 | 10.1     | 13.325   | 3.225   | 0.757973734 | 0.5173   | 1.331  |
| 101793_at   | 20.5   | 29.6   | 9.5    | 11.9   | 12.4   | 20.2   | 14     | 11.5   | 0.53659244  | 17.875   | 14.525   | 3.35    | 1.230636833 | 0.6589   | -1.142 |
| 101794_f_at | 101.2  | 65.5   | 80.6   | 73.3   | 49.5   | 142.7  | 88.7   | 50.2   | 0.916016574 | 80.15    | 82.775   | 2.625   | 0.968287526 | 0.8464   | -1.056 |
| 101795_f_at | 152.1  | 169.7  | 127.3  | 90     | 148.1  | 211.4  | 187.7  | 157.5  | 0.11728371  | 134.775  | 176.175  | 41.4    | 0.765006386 | 0.1269   | 1.33   |
| 101796_at   | 24.7   | 18.6   | 9.8    | 12     | 12.1   | 18.5   | 17.7   | 10.1   | 0.689760097 | 16.275   | 14.6     | 1.675   | 1.114726027 | 0.776    | -1.079 |
| 101797_at   | 9.3    | 7.9    | 10     | 6.8    | 5.4    | 10     | 8.1    | 5.7    | 0.396372784 | 8.5      | 7.3      | 1.2     | 1.164383562 | 0.3459   | -1.188 |
| 101798_at   | 18     | 11.8   | 23.9   | 27.2   | 11.2   | 15.2   | 57.5   | 11.6   | 0.773388698 | 20.225   | 23.875   | 3.65    | 0.847120419 | 0.9141   | -1.049 |
| 101799_at   | 11.3   | 7.6    | 12.7   | 9.4    | 7.4    | 12.5   | 11.1   | 12.7   | 0.697964921 | 10.25    | 10.925   | 0.675   | 0.938215103 | 0.7246   | 1.064  |
| 101800_at   | 26.7   | 38.4   | 18.4   | 22.2   | 40     | 52.1   | 30.3   | 29.9   | 0.138752957 | 26.425   | 38.075   | 11.65   | 0.694024951 | 0.1155   | 1.458  |
| 101801_at   | 6.1    | 9.6    | 5.9    | 9.5    | 30.5   | 24.8   | 10.3   | 4.4    | 0.208833181 | 7.775    | 17.5     | 9.725   | 0.444285714 | 0.2568   | 1.79   |
| 101802_at   | 2.4    | 3      | 1.5    | 15.9   | 6.3    | 3.1    | 11.1   | 12.6   | 0.552691038 | 5.7      | 8.275    | 2.575   | 0.688821752 | 0.296    | 1.995  |
| 101803_at   | 6.7    | 5.2    | 3.8    | 4.1    | 2.7    | 5      | 3.9    | 4.2    | 0.268039143 | 4.95     | 3.95     | 1       | 1.253164557 | 0.2776   | -1.245 |
| 101804_at   | 21     | 13.1   | 33.7   | 11.6   | 45.9   | 52.2   | 20.5   | 8.6    | 0.353002048 | 19.85    | 31.8     | 11.95   | 0.624213836 | 0.506    | 1.406  |
| 101805_f_at | 96.1   | 122    | 137.3  | 144.9  | 139.5  | 160.6  | 122.7  | 135    | 0.326565498 | 125.075  | 139.45   | 14.375  | 0.896916458 | 0.3192   | 1.123  |
| 101806_at   | 289.8  | 239.2  | 241.5  | 235.6  | 172.1  | 306.1  | 260.5  | 211.1  | 0.680860666 | 251.525  | 237.45   | 14.075  | 1.059275637 | 0.5872   | -1.08  |
| 101807_at   | 70.5   | 21.8   | 24.4   | 34.8   | 36     | 43.9   | 21.9   | 9.1    | 0.487677963 | 37.875   | 27.725   | 10.15   | 1.366095582 | 0.4501   | -1.426 |
| 101808_at   | 33.8   | 20.1   | 12.1   | 16.6   | 14.1   | 11.8   | 14.6   | 14.9   | 0.242478429 | 20.65    | 13.85    | 6.8     | 1.490974729 | 0.1866   | -1.392 |
| 101809_at   | 14.4   | 9.4    | 34.8   | 10.2   | 6.8    | 12.4   | 8.3    | 8.6    | 0.265569411 | 17.2     | 9.025    | 8.175   | 1.905817175 | 0.1587   | -1.684 |
| 101810_at   | 1047.6 | 850.7  | 768.8  | 792.2  | 348    | 483.2  | 445.4  | 372.8  | 0.002209443 | 864.825  | 412.35   | 452.475 | 2.097308112 | 0.000369 | -2.1   |
| 101811_at   | 18.8   | 12.1   | 17.8   | 14.6   | 15.8   | 18.8   | 14.1   | 17.9   | 0.674877829 | 15.825   | 16.65    | 0.825   | 0.95045045  | 0.6239   | 1.063  |
| 101814_at   | 25.9   | 25.7   | 32.9   | 23     | 21.8   | 34.4   | 10.9   | 31.4   | 0.714064645 | 26.875   | 24.625   | 2.25    | 1.091370558 | 0.5574   | -1.184 |
| 101815_at   | 9.3    | 11.4   | 25     | 23     | 13.3   | 30.6   | 29.8   | 22.5   | 0.270144147 | 17.175   | 24.05    | 6.875   | 0.714137214 | 0.2795   | 1.454  |
| 101816_at   | 27.3   | 34.8   | 12.6   | 24.1   | 14.3   | 32.2   | 33.8   | 22.7   | 0.876410851 | 24.7     | 25.75    | 1.05    | 0.959223301 | 0.8704   | 1.051  |
| 101820_at   | 18.2   | 13.2   | 15.4   | 10.3   | 8.3    | 23.5   | 12.8   | 9.5    | 0.854054526 | 14.275   | 13.525   | 0.75    | 1.055452865 | 0.665    | -1.126 |
| 101821_at   | 18.2   | 20.5   | 15.5   | 63.9   | 12.1   | 25.7   | 10.9   | 14.4   | 0.32353786  | 29.525   | 15.775   | 13.75   | 1.87163233  | 0.226    | -1.659 |
| 101822_at   | 151.4  | 36.6   | 44.7   | 110.7  | 66.6   | 98.5   | 40.8   | 126.3  | 0.935822963 | 85.85    | 83.05    | 2.8     | 1.03371463  | 0.9058   | 1.054  |
| 101823_at   | 80.9   | 45.3   | 35     | 56.5   | 42.7   | 78.7   | 62.1   | 47.1   | 0.809651864 | 54.425   | 57.65    | 3.225   | 0.944058977 | 0.7477   | 1.079  |
| 101824_at   | 8.8    | 7.5    | 8.8    | 6      | 19.4   | 9.2    | 9.3    | 7.4    | 0.286655929 | 7.775    | 11.325   | 3.55    | 0.686534216 | 0.2133   | 1.375  |



|             |         |         |         |         |         |         |         |         |             |           |          |          |             |          |        |
|-------------|---------|---------|---------|---------|---------|---------|---------|---------|-------------|-----------|----------|----------|-------------|----------|--------|
| 101825_at   | 25      | 19.6    | 11.7    | 27.5    | 7.3     | 9.5     | 5.4     | 27.8    | 0.230843539 | 20.95     | 12.5     | 8.45     | 1.676       | 0.1445   | -1.969 |
| 101826_at   | 1.4     | 3.8     | 5.2     | 5.4     | 4.1     | 17      | 2.8     | 4       | 0.44085246  | 3.95      | 6.975    | 3.025    | 0.566308244 | 0.4564   | 1.493  |
| 101827_at   | 99.4    | 24.5    | 50.4    | 41.9    | 36.3    | 89.8    | 53.5    | 34.7    | 0.982327174 | 54.05     | 53.575   | 0.475    | 1.008866076 | 0.9169   | 1.04   |
| 101828_at   | 5.7     | 12.5    | 16.1    | 18.6    | 3       | 6.9     | 4       | 4.9     | 0.050725297 | 13.225    | 4.7      | 8.525    | 2.813829787 | 0.01967  | -2.698 |
| 101829_at   | 102.5   | 48.6    | 60.6    | 24.1    | 38.6    | 78.3    | 59      | 43.8    | 0.838313548 | 58.95     | 54.925   | 4.025    | 1.073281748 | 0.9609   | 1.017  |
| 101830_at   | 164.6   | 155.2   | 112.9   | 136.1   | 123.6   | 180.5   | 132.3   | 152.5   | 0.778049765 | 142.2     | 147.225  | 5.025    | 0.965868569 | 0.7802   | 1.035  |
| 101831_at   | 144.8   | 83.6    | 82.6    | 107.4   | 88      | 151.3   | 115.3   | 55.3    | 0.935444376 | 104.6     | 102.475  | 2.125    | 1.020736765 | 0.8239   | -1.06  |
| 101834_at   | 355.9   | 340.4   | 484.4   | 619.8   | 428.1   | 414.1   | 515.8   | 635.1   | 0.582478185 | 450.125   | 498.275  | 48.15    | 0.903366615 | 0.5212   | 1.124  |
| 101835_at   | 99.3    | 120.1   | 82.8    | 78.1    | 86.6    | 117.5   | 84.2    | 84.2    | 0.881388899 | 95.075    | 93.125   | 1.95     | 1.020939597 | 0.9      | 1.017  |
| 101836_at   | 84.3    | 149.7   | 152.7   | 212.7   | 195.5   | 132.3   | 115.8   | 209.2   | 0.715470736 | 149.85    | 163.2    | 13.35    | 0.918198529 | 0.6742   | 1.112  |
| 101837_g_at | 651.9   | 602.2   | 890     | 930.1   | 531.2   | 562.3   | 795     | 911     | 0.598575661 | 768.55    | 699.875  | 68.675   | 1.098124665 | 0.5735   | -1.107 |
| 101838_r_at | 323.2   | 245.7   | 267.9   | 212.3   | 224.1   | 230.9   | 240.4   | 246.6   | 0.33674902  | 262.275   | 235.5    | 26.775   | 1.113694268 | 0.3251   | -1.102 |
| 101839_at   | 16.3    | 9.3     | 3.1     | 6.3     | 11      | 17      | 4.6     | 18.4    | 0.381275792 | 8.75      | 12.75    | 4        | 0.68627451  | 0.4034   | 1.53   |
| 101840_at   | 228.3   | 102.6   | 108.9   | 139.4   | 49      | 142.3   | 167.3   | 121.2   | 0.543560814 | 144.8     | 119.95   | 24.85    | 1.207169654 | 0.5103   | -1.259 |
| 101841_at   | 56      | 42.1    | 45.8    | 43      | 54.4    | 69.3    | 31.1    | 57.1    | 0.507959422 | 46.725    | 52.975   | 6.25     | 0.882019821 | 0.6365   | 1.096  |
| 101842_g_at | 211     | 177.2   | 196.5   | 166.7   | 128     | 220.6   | 287.6   | 193.4   | 0.604926455 | 187.85    | 207.4    | 19.55    | 0.905737705 | 0.7374   | 1.064  |
| 101843_at   | 353.5   | 366.4   | 405     | 307.7   | 269.1   | 268.4   | 215.5   | 271.8   | 0.007499042 | 358.15    | 256.2    | 101.95   | 1.397931304 | 0.00575  | -1.398 |
| 101844_at   | 137.9   | 137.5   | 132.8   | 141.3   | 152.5   | 197.6   | 172.2   | 176.9   | 0.025092545 | 137.375   | 174.8    | 37.425   | 0.785898169 | 0.00496  | 1.267  |
| 101845_s_at | 18.3    | 3       | 2.7     | 10.8    | 2       | 6.1     | 2.5     | 3.4     | 0.257446846 | 8.7       | 3.5      | 5.2      | 2.485714286 | 0.2447   | -1.987 |
| 101846_r_at | 16.6    | 14.5    | 5.9     | 32.4    | 12      | 22.1    | 10.8    | 16.3    | 0.752353596 | 17.35     | 15.3     | 2.05     | 1.133986928 | 0.9948   | 1.003  |
| 101847_at   | 8.1     | 8.3     | 18.1    | 30.7    | 5.1     | 4.7     | 10.1    | 40.1    | 0.90157229  | 16.3      | 15       | 1.3      | 1.086666667 | 0.5889   | -1.402 |
| 101848_g_at | 29.8    | 33.1    | 13.8    | 40.6    | 30.3    | 46.6    | 7       | 26.1    | 0.860616092 | 29.325    | 27.5     | 1.825    | 1.066363636 | 0.7011   | -1.209 |
| 101850_at   | 199.6   | 324.9   | 247.9   | 335.4   | 459.1   | 288.9   | 250.7   | 322.5   | 0.378970123 | 276.95    | 330.3    | 53.35    | 0.83848017  | 0.3714   | 1.187  |
| 101851_at   | 744.3   | 798.8   | 1023.4  | 982.7   | 700.3   | 752     | 976.3   | 752.8   | 0.356121646 | 887.3     | 795.35   | 91.95    | 1.11560948  | 0.3474   | -1.115 |
| 101853_f_at | 128.8   | 140.7   | 152.4   | 232     | 215.7   | 183     | 214.8   | 144.6   | 0.403293313 | 163.475   | 189.525  | 26.05    | 0.862551115 | 0.3515   | 1.176  |
| 101854_r_at | 238     | 170.9   | 273.1   | 335.8   | 256.2   | 311.7   | 237     | 265.6   | 0.744746743 | 254.45    | 267.625  | 13.175   | 0.950770668 | 0.6445   | 1.077  |
| 101855_at   | 154.5   | 175.7   | 103.7   | 161.5   | 93.2    | 89      | 134.2   | 145.2   | 0.165786749 | 148.85    | 115.4    | 33.45    | 1.289861352 | 0.1819   | -1.295 |
| 101856_at   | 198.2   | 209.4   | 288.8   | 211.7   | 223.7   | 316.1   | 231.5   | 197.9   | 0.660489055 | 227.025   | 242.3    | 15.275   | 0.936958316 | 0.6583   | 1.063  |
| 101857_at   | 234.5   | 258.9   | 356.6   | 339     | 200.9   | 291     | 342.1   | 326.2   | 0.873801494 | 297.25    | 290.05   | 7.2      | 1.024823306 | 0.8585   | -1.03  |
| 101858_at   | 487.1   | 340.4   | 400.7   | 578.2   | 411.7   | 448.3   | 448     | 509.2   | 0.963683906 | 451.6     | 454.3    | 2.7      | 0.994056791 | 0.8587   | -1.023 |
| 101859_at   | 16.9    | 82.8    | 13.2    | 30.4    | 26.5    | 47.2    | 50.4    | 40.6    | 0.769379418 | 35.825    | 41.175   | 5.35     | 0.870066788 | 0.4157   | 1.46   |
| 101860_at   | 78.9    | 70.7    | 71.9    | 70.9    | 60.8    | 140.2   | 116.8   | 167.5   | 0.123030099 | 73.1      | 121.325  | 48.225   | 0.602513909 | 0.09415  | 1.556  |
| 101861_at   | 2273.6  | 2131.8  | 1440    | 1464.7  | 1787.1  | 1839.8  | 1745.1  | 1606.3  | 0.733840125 | 1827.525  | 1744.575 | 82.95    | 1.047547397 | 0.8418   | -1.026 |
| 101862_at   | 11.3    | 7.1     | 7.6     | 11.9    | 13.7    | 16.8    | 9.3     | 15      | 0.084492606 | 9.475     | 13.7     | 4.225    | 0.691605839 | 0.09109  | 1.447  |
| 101863_at   | 31.2    | 17      | 13.6    | 22.8    | 19.6    | 37.4    | 40.8    | 22.4    | 0.227678442 | 21.15     | 30.05    | 8.9      | 0.703826955 | 0.2203   | 1.421  |
| 101864_at   | 50.2    | 28.2    | 20.5    | 29.5    | 27.3    | 32.7    | 21.1    | 25.5    | 0.468924231 | 32.1      | 26.65    | 5.45     | 1.204502814 | 0.5096   | -1.156 |
| 101865_at   | 59.5    | 69.1    | 84.5    | 102.4   | 34.6    | 79.7    | 68.4    | 61.1    | 0.229746734 | 78.875    | 60.95    | 17.925   | 1.294093519 | 0.2411   | -1.326 |
| 101866_at   | 362.5   | 260.7   | 342.9   | 405.1   | 292.7   | 336.6   | 436.9   | 428.5   | 0.531899809 | 342.8     | 373.675  | 30.875   | 0.917374724 | 0.5519   | 1.089  |
| 101867_at   | 950.7   | 920     | 933.1   | 869.9   | 941.3   | 1058.3  | 854.6   | 1029.5  | 0.348763229 | 918.425   | 970.925  | 52.5     | 0.945927852 | 0.3503   | 1.054  |
| 101868_i_at | 116.6   | 18.9    | 75      | 143.2   | 126.5   | 163.7   | 103.3   | 64.8    | 0.474368248 | 88.425    | 114.575  | 26.15    | 0.771765219 | 0.4073   | 1.556  |
| 101869_s_at | 19238.3 | 25356.7 | 15004.3 | 13943.2 | 19030.9 | 19356.4 | 12998.6 | 16813.9 | 0.673232071 | 18385.625 | 17049.95 | 1335.675 | 1.078338939 | 0.7295   | -1.061 |
| 101870_at   | 13.6    | 8.9     | 4.5     | 4.8     | 8.3     | 10.8    | 4.2     | 6.2     | 0.830882178 | 7.95      | 7.375    | 0.575    | 1.077966102 | 0.9433   | -1.025 |
| 101871_f_at | 10.5    | 6.7     | 7.9     | 6.2     | 5.8     | 8.6     | 7.8     | 7.1     | 0.676356618 | 7.825     | 7.325    | 0.5      | 1.068259386 | 0.7071   | -1.058 |
| 101872_at   | 1490.7  | 1428.7  | 1321.8  | 1124.8  | 1627.6  | 1615.6  | 1472    | 1260.9  | 0.240822366 | 1341.5    | 1494.025 | 152.525  | 0.897910008 | 0.2547   | 1.114  |
| 101873_at   | 20.9    | 20      | 38.4    | 24.7    | 19.4    | 45.7    | 37.5    | 26.6    | 0.418455296 | 26        | 32.3     | 6.3      | 0.80495356  | 0.4386   | 1.222  |
| 101874_s_at | 11.3    | 4.4     | 0.8     | 5       | 0.9     | 24.7    | 1.3     | 6.1     | 0.658485743 | 5.375     | 8.25     | 2.875    | 0.651515152 | 0.9678   | -1.041 |
| 101875_at   | 533.1   | 400.5   | 503.9   | 335.9   | 449.8   | 394.5   | 497.9   | 385.4   | 0.837002842 | 443.35    | 431.9    | 11.45    | 1.026510766 | 0.9075   | 1.015  |
| 101876_s_at | 778.7   | 847.9   | 633.8   | 663.1   | 851.6   | 799.8   | 568.8   | 788.1   | 0.800639907 | 730.875   | 752.075  | 21.2     | 0.971811322 | 0.8404   | 1.024  |
| 101877_at   | 1592.3  | 1444.5  | 1689.7  | 1416.6  | 894.4   | 862.6   | 1300.2  | 973.2   | 0.006460923 | 1535.775  | 1007.6   | 528.175  | 1.524191147 | 0.005403 | -1.541 |
| 101878_at   | 21.2    | 27.8    | 21      | 15.5    | 31.8    | 36.3    | 31.4    | 38.4    | 0.006769468 | 21.375    | 34.475   | 13.1     | 0.620014503 | 0.008555 | 1.641  |
| 101879_s_at | 439.5   | 442.1   | 482     | 456.8   | 572.5   | 493.8   | 604.3   | 506.7   | 0.036287351 | 455.1     | 544.325  | 89.225   | 0.836081385 | 0.01563  | 1.193  |
| 101880_at   | 19.3    | 18.2    | 25.7    | 14.9    | 34.1    | 76.6    | 66      | 36.8    | 0.046392276 | 19.525    | 53.375   | 33.85    | 0.365807963 | 0.006018 | 2.627  |
| 101881_g_at | 512.5   | 541.4   | 813.1   | 813.6   | 663.8   | 542.9   | 787.7   | 725.8   | 0.923399676 | 670.15    | 680.05   | 9.9      | 0.985442247 | 0.8532   | 1.029  |
| 101882_s_at | 414.5   | 602.2   | 789.1   | 818.4   | 599.2   | 542.5   | 743.4   | 653.7   | 0.845421354 | 656.05    | 634.7    | 21.35    | 1.033637939 | 0.9772   | 1.005  |
| 101883_s_at | 513.2   | 389.5   | 365.9   | 495.3   | 430     | 538.2   | 314.2   | 426.9   | 0.824594536 | 440.975   | 427.325  | 13.65    | 1.031942901 | 0.791    | -1.039 |
| 101884_at   | 48.3    | 50.1    | 57.5    | 76.9    | 70.3    | 81.9    | 41.9    | 62.2    | 0.602872438 | 58.2      | 64.075   | 5.875    | 0.908310574 | 0.6537   | 1.088  |



|             |        |        |        |        |        |        |        |        |             |          |          |         |             |          |        |
|-------------|--------|--------|--------|--------|--------|--------|--------|--------|-------------|----------|----------|---------|-------------|----------|--------|
| 101885_at   | 26.5   | 26     | 29.9   | 30.7   | 25     | 44     | 33     | 34.6   | 0.231278028 | 28.275   | 34.15    | 5.875   | 0.827964861 | 0.2083   | 1.189  |
| 101886_f_at | 503.7  | 467.8  | 488.4  | 478.9  | 436.2  | 487.8  | 413.3  | 488.5  | 0.238533568 | 484.7    | 456.45   | 28.25   | 1.061890678 | 0.2124   | -1.064 |
| 101887_at   | 249.8  | 306    | 191.1  | 130.5  | 306.1  | 183.6  | 272.1  | 216.6  | 0.609989301 | 219.35   | 244.6    | 25.25   | 0.896770237 | 0.5472   | 1.148  |
| 101888_at   | 11.4   | 12.7   | 6      | 3.6    | 2.9    | 11.8   | 6.9    | 4.9    | 0.556218043 | 8.425    | 6.625    | 1.8     | 1.271698113 | 0.5752   | -1.282 |
| 101889_s_at | 266.9  | 195.7  | 239.3  | 197    | 96.5   | 167.5  | 100.2  | 150.6  | 0.008403468 | 224.725  | 128.7    | 96.025  | 1.746114996 | 0.01113  | -1.783 |
| 101890_f_at | 1098.8 | 998.7  | 1018.9 | 1099.9 | 1240.1 | 1117.9 | 1100.2 | 1130.9 | 0.065687051 | 1054.075 | 1147.275 | 93.2    | 0.918764028 | 0.06147  | 1.088  |
| 101891_at   | 9      | 13.9   | 13.9   | 4.5    | 29.9   | 33.5   | 4.1    | 23.9   | 0.15091865  | 10.325   | 22.85    | 12.525  | 0.451859956 | 0.2975   | 1.89   |
| 101892_f_at | 164    | 237.1  | 198.3  | 221    | 236.9  | 126.9  | 217    | 202.9  | 0.76241064  | 205.1    | 195.925  | 9.175   | 1.046829144 | 0.708    | -1.065 |
| 101893_r_at | 9      | 3.9    | 0.1    | 4.9    | 0.1    | 1      | 4.7    | 0.3    | 0.224767258 | 4.475    | 1.525    | 2.95    | 2.93442623  | 0.4375   | -2.995 |
| 101894_s_at | 197    | 106.6  | 159.1  | 221.4  | 189.6  | 242.6  | 232.8  | 145.1  | 0.384218463 | 171.025  | 202.525  | 31.5    | 0.844463646 | 0.3875   | 1.204  |
| 101896_at   | 15.3   | 14.8   | 11.2   | 33.3   | 23.3   | 15.9   | 37     | 29.9   | 0.285524202 | 18.65    | 26.525   | 7.875   | 0.703110273 | 0.2286   | 1.488  |
| 101897_g_at | 471    | 433.9  | 430.9  | 473    | 468.3  | 616.6  | 527.2  | 522.2  | 0.071038935 | 452.2    | 533.575  | 81.375  | 0.847490981 | 0.04044  | 1.175  |
| 101898_s_at | 257.2  | 205.1  | 148.7  | 177.3  | 161.8  | 248.8  | 158.1  | 132.5  | 0.549219296 | 197.075  | 175.3    | 21.775  | 1.12421563  | 0.5067   | -1.133 |
| 101899_at   | 18.2   | 13.1   | 10     | 14.3   | 4.8    | 11.6   | 4.6    | 23.4   | 0.586407757 | 13.9     | 11.1     | 2.8     | 1.252252252 | 0.3302   | -1.544 |
| 101900_at   | 29.4   | 4.6    | 15.4   | 27.2   | 21.2   | 6.5    | 7.1    | 24.3   | 0.576261665 | 19.15    | 14.775   | 4.375   | 1.296108291 | 0.7105   | -1.24  |
| 101901_at   | 596    | 740.8  | 707.7  | 716.4  | 861.9  | 698.5  | 650.1  | 828.5  | 0.298967517 | 690.225  | 759.75   | 69.525  | 0.908489635 | 0.3082   | 1.097  |
| 101902_at   | 412.4  | 335.1  | 350.2  | 372.5  | 232.2  | 350.4  | 450.7  | 362.5  | 0.718550759 | 367.55   | 348.95   | 18.6    | 1.053302765 | 0.6193   | -1.079 |
| 101903_at   | 11.8   | 8.8    | 5.2    | 9.1    | 6.4    | 7.2    | 5.2    | 9.1    | 0.319945661 | 8.725    | 6.975    | 1.75    | 1.250896057 | 0.3552   | -1.231 |
| 101904_at   | 67.5   | 19     | 50.7   | 47.5   | 46.7   | 77.6   | 36.7   | 51.5   | 0.620817498 | 46.175   | 53.125   | 6.95    | 0.869176471 | 0.5518   | 1.221  |
| 101905_at   | 1093.4 | 584.7  | 608.7  | 630.7  | 713.6  | 894.9  | 695.2  | 591    | 0.968616941 | 729.375  | 723.675  | 5.7     | 1.007876464 | 0.9253   | 1.017  |
| 101906_at   | 2608.1 | 2888.1 | 2435.9 | 2755.6 | 2742.6 | 2224.9 | 2638.9 | 2451.4 | 0.334229116 | 2671.925 | 2514.45  | 157.475 | 1.06262801  | 0.3333   | -1.064 |
| 101907_s_at | 34.7   | 48.4   | 48.8   | 66.3   | 38.6   | 94.7   | 116.3  | 43.3   | 0.312256652 | 49.55    | 73.225   | 23.675  | 0.676681461 | 0.3575   | 1.357  |
| 101908_s_at | 45.5   | 8.8    | 25.8   | 32.5   | 34.4   | 41.1   | 32     | 40.2   | 0.339799193 | 28.15    | 36.925   | 8.775   | 0.762356127 | 0.2858   | 1.524  |
| 101909_f_at | 42.8   | 50.5   | 9.1    | 45.1   | 49.5   | 46.7   | 54.2   | 8.9    | 0.840546167 | 36.875   | 39.825   | 2.95    | 0.925925926 | 0.9271   | 1.058  |
| 101910_f_at | 12.1   | 11.3   | 9.5    | 12.8   | 50.8   | 60.3   | 13.6   | 25.4   | 0.095230204 | 11.425   | 37.525   | 26.1    | 0.304463691 | 0.02404  | 2.834  |
| 101912_at   | 57.2   | 65     | 48.1   | 38.3   | 85.7   | 72.8   | 36.8   | 55.8   | 0.422036026 | 52.15    | 62.775   | 10.625  | 0.830744723 | 0.4965   | 1.17   |
| 101913_at   | 866.4  | 990.9  | 937.7  | 760.9  | 846    | 737.7  | 1004.2 | 804.9  | 0.608134511 | 888.975  | 848.2    | 40.775  | 1.048072389 | 0.595    | -1.05  |
| 101914_at   | 927.1  | 890.8  | 903.1  | 869.8  | 1077   | 908.4  | 877.6  | 1029.8 | 0.212370185 | 897.7    | 973.2    | 75.5    | 0.92242088  | 0.1785   | 1.08   |
| 101916_at   | 223    | 268.9  | 340.6  | 338.9  | 183.1  | 399.7  | 236    | 335.8  | 0.943718794 | 292.85   | 288.65   | 4.2     | 1.014550494 | 0.8344   | -1.045 |
| 101917_at   | 23.9   | 3.7    | 7.1    | 3.2    | 2.5    | 6.4    | 4.5    | 6.2    | 0.421125124 | 9.475    | 4.9      | 4.575   | 1.933673469 | 0.4871   | -1.455 |
| 101918_at   | 25.3   | 75.8   | 149.6  | 95.7   | 16.4   | 19.9   | 13.8   | 19.3   | 0.073905047 | 86.6     | 17.35    | 69.25   | 4.991354467 | 0.009942 | -4.217 |
| 101919_at   | 653.3  | 776.5  | 747.6  | 674.8  | 838.8  | 817.2  | 753.4  | 658.8  | 0.324146307 | 713.05   | 767.05   | 54      | 0.929600417 | 0.3357   | 1.074  |
| 101920_at   | 159.1  | 222    | 203.6  | 282.3  | 220.6  | 183.8  | 280.2  | 208.7  | 0.847637914 | 216.75   | 223.325  | 6.575   | 0.970558603 | 0.8018   | 1.04   |
| 101921_at   | 550.1  | 469.7  | 423.6  | 532.7  | 420.5  | 431.8  | 406.4  | 444.9  | 0.097811101 | 494.025  | 425.9    | 68.125  | 1.159955389 | 0.0632   | -1.154 |
| 101922_at   | 782.1  | 1144   | 610.7  | 906.5  | 1025.4 | 726.8  | 930.7  | 922.5  | 0.76600874  | 860.825  | 901.35   | 40.525  | 0.955039663 | 0.6856   | 1.066  |
| 101923_at   | 165.4  | 224.1  | 246.4  | 260.6  | 153.3  | 160    | 157.2  | 160.4  | 0.050138097 | 224.125  | 157.725  | 66.4    | 1.420985893 | 0.01625  | -1.401 |
| 101924_at   | 165.9  | 104.5  | 123.7  | 137.7  | 104.5  | 185.1  | 112.6  | 117.6  | 0.899382241 | 132.95   | 129.95   | 3       | 1.023085802 | 0.8318   | -1.036 |
| 101926_at   | 141.6  | 117.4  | 160.7  | 133    | 153    | 135.4  | 134.9  | 163.2  | 0.487877524 | 138.175  | 146.625  | 8.45    | 0.942369991 | 0.4676   | 1.064  |
| 101927_at   | 381.7  | 309.6  | 308.8  | 319    | 259.5  | 356    | 330    | 358    | 0.897371722 | 329.775  | 325.875  | 3.9     | 1.011967779 | 0.8644   | -1.016 |
| 101928_at   | 14.4   | 10.1   | 8.3    | 11.5   | 12.1   | 24.9   | 10     | 8.4    | 0.526513637 | 11.075   | 13.85    | 2.775   | 0.799638989 | 0.5929   | 1.162  |
| 101929_at   | 1412.3 | 1333.6 | 2022.3 | 1900.9 | 1329.3 | 1530.3 | 1657.1 | 1948   | 0.821222048 | 1667.275 | 1616.175 | 51.1    | 1.031617863 | 0.8587   | -1.025 |
| 101930_at   | 655.9  | 898.7  | 1356.2 | 1132.2 | 552.9  | 767.5  | 828.5  | 620    | 0.12274901  | 1010.75  | 692.225  | 318.525 | 1.460146629 | 0.09914  | -1.427 |
| 101931_at   | 1258.7 | 1311.9 | 1599.2 | 1475.8 | 1492.4 | 1513.2 | 1666.7 | 1471.4 | 0.225928635 | 1411.4   | 1535.925 | 124.525 | 0.918925078 | 0.204    | 1.092  |
| 101932_at   | 490.6  | 359    | 543.8  | 506.2  | 459.9  | 418    | 443.9  | 450.7  | 0.492116434 | 474.9    | 443.125  | 31.775  | 1.071706629 | 0.5609   | -1.06  |
| 101933_at   | 481.6  | 517.3  | 770.9  | 894.3  | 474.6  | 447.7  | 697.2  | 778.4  | 0.624846256 | 666.025  | 599.475  | 66.55   | 1.111013804 | 0.6427   | -1.105 |
| 101934_at   | 388.2  | 382.4  | 426.7  | 454.8  | 367.5  | 369.7  | 466.4  | 490.2  | 0.786481382 | 413.025  | 423.45   | 10.425  | 0.975380801 | 0.8347   | 1.019  |
| 101936_at   | 544.6  | 481.7  | 493.7  | 503.7  | 672.6  | 511.7  | 550.3  | 625.9  | 0.098731688 | 505.925  | 590.125  | 84.2    | 0.857318365 | 0.06792  | 1.161  |
| 101937_s_at | 180.3  | 98.4   | 188.3  | 170.7  | 109    | 178.3  | 221.6  | 165.8  | 0.776087568 | 159.425  | 168.675  | 9.25    | 0.945160812 | 0.7999   | 1.058  |
| 101938_at   | 220.1  | 101.8  | 125.7  | 150.5  | 103.4  | 213.9  | 150.2  | 106.9  | 0.875559335 | 149.525  | 143.6    | 5.925   | 1.041260446 | 0.8576   | -1.045 |
| 101939_at   | 1530   | 1330.8 | 1457.1 | 1361.2 | 1354.9 | 1474   | 1334.7 | 1332.9 | 0.453498903 | 1419.775 | 1374.125 | 45.65   | 1.033221141 | 0.453    | -1.033 |
| 101940_at   | 699.1  | 536    | 577.8  | 554.2  | 598.3  | 692.4  | 555.9  | 578.1  | 0.772300044 | 591.775  | 606.175  | 14.4    | 0.976244484 | 0.7456   | 1.026  |
| 101942_at   | 497.2  | 393.7  | 437.5  | 546.1  | 366.5  | 521    | 513    | 592.4  | 0.629977811 | 468.625  | 498.225  | 29.6    | 0.940589091 | 0.6819   | 1.055  |
| 101943_at   | 745.1  | 698    | 764.4  | 710.4  | 788.6  | 884.9  | 722.7  | 789.4  | 0.138968019 | 729.475  | 796.4    | 66.925  | 0.915965595 | 0.1146   | 1.09   |
| 101944_at   | 965.5  | 753.4  | 879.2  | 798.5  | 558.8  | 954.9  | 938.6  | 768.2  | 0.690289824 | 849.15   | 805.125  | 44.025  | 1.05468095  | 0.6213   | -1.073 |
| 101945_g_at | 57.4   | 48.4   | 99.9   | 114.6  | 32.9   | 73.4   | 166.5  | 132.3  | 0.561117566 | 80.075   | 101.275  | 21.2    | 0.790668971 | 0.7679   | 1.138  |
| 101946_at   | 452.4  | 392.6  | 541.6  | 523.5  | 229.1  | 435.4  | 587.7  | 464.3  | 0.584790895 | 477.525  | 429.125  | 48.4    | 1.112787649 | 0.5004   | -1.166 |



|             |        |        |        |        |        |        |        |        |             |          |          |          |             |          |        |
|-------------|--------|--------|--------|--------|--------|--------|--------|--------|-------------|----------|----------|----------|-------------|----------|--------|
| 101947_at   | 561.4  | 544    | 607.1  | 684.6  | 537    | 589.6  | 358.1  | 660.4  | 0.425982276 | 599.275  | 536.275  | 63       | 1.117477041 | 0.3909   | -1.141 |
| 101948_at   | 756.8  | 814    | 883.7  | 1096.3 | 1069.5 | 951.1  | 1149.6 | 1211.4 | 0.07041553  | 887.7    | 1095.4   | 207.7    | 0.810388899 | 0.06491  | 1.241  |
| 101949_at   | 179.5  | 205.9  | 249.3  | 183.5  | 249.2  | 219.5  | 160.7  | 243.1  | 0.618081881 | 204.55   | 218.125  | 13.575   | 0.937765043 | 0.6582   | 1.06   |
| 101950_at   | 15.5   | 25.3   | 34.3   | 34.7   | 19.7   | 48.5   | 24     | 46.6   | 0.445425131 | 27.45    | 34.7     | 7.25     | 0.791066282 | 0.5104   | 1.23   |
| 101952_at   | 43.9   | 94.6   | 87.1   | 123.8  | 121.5  | 100.2  | 73.8   | 68.5   | 0.865572528 | 87.35    | 91       | 3.65     | 0.95989011  | 0.7686   | 1.083  |
| 101953_at   | 13.2   | 6      | 1.8    | 1.5    | 1.9    | 5.3    | 2.1    | 3.9    | 0.465080475 | 5.625    | 3.3      | 2.325    | 1.704545455 | 0.7018   | -1.26  |
| 101954_at   | 4126.6 | 5537.4 | 5056.2 | 5807.2 | 4797.4 | 4084.4 | 5618.7 | 4948.6 | 0.599109251 | 5131.85  | 4862.275 | 269.575  | 1.055442154 | 0.6215   | -1.053 |
| 101955_at   | 4482.8 | 5093.6 | 5289.9 | 5206.6 | 6364.5 | 5794.8 | 6967.2 | 6458.5 | 0.004554063 | 5018.225 | 6396.25  | 1378.025 | 0.784557358 | 0.00393  | 1.275  |
| 101956_at   | 327.5  | 342.8  | 448.5  | 469.4  | 404.9  | 471.3  | 475.6  | 495.1  | 0.18116323  | 397.05   | 461.725  | 64.675   | 0.859927446 | 0.1657   | 1.174  |
| 101957_f_at | 290.2  | 437.8  | 417.9  | 666.7  | 461    | 314    | 427.1  | 598.6  | 0.976803434 | 453.15   | 450.175  | 2.975    | 1.006608541 | 0.9605   | 1.011  |
| 101958_f_at | 791.5  | 1151.7 | 1392.2 | 1353.3 | 1157.6 | 770.1  | 1271.5 | 1066.4 | 0.56752622  | 1172.175 | 1066.4   | 105.775  | 1.09918886  | 0.6231   | -1.092 |
| 101959_r_at | 2957.9 | 3071.5 | 2489.5 | 2722.6 | 2445.8 | 2489.8 | 2317.9 | 2727.4 | 0.095548015 | 2810.375 | 2495.225 | 315.15   | 1.126301235 | 0.08778  | -1.125 |
| 101960_at   | 1507.3 | 1301.6 | 1388.1 | 1173.1 | 1535.1 | 1324.8 | 1465   | 1362.3 | 0.392996311 | 1342.525 | 1421.8   | 79.275   | 0.944243213 | 0.3766   | 1.062  |
| 101961_at   | 3487.7 | 3127.6 | 2943.6 | 2892.2 | 3121.4 | 3291.5 | 2964.3 | 2971.8 | 0.876175052 | 3112.775 | 3087.25  | 25.525   | 1.008267876 | 0.8996   | 1.006  |
| 101962_at   | 2541.6 | 2084   | 2538.1 | 3139.1 | 2455.6 | 2356.9 | 2899.1 | 2881.7 | 0.789574311 | 2575.7   | 2648.325 | 72.625   | 0.972577006 | 0.7438   | 1.035  |
| 101963_at   | 7180.9 | 7295.7 | 6403.7 | 7332.9 | 7614.1 | 7075.5 | 8745.5 | 7477.3 | 0.169002306 | 7053.3   | 7728.1   | 674.8    | 0.912682289 | 0.1554   | 1.094  |
| 101964_at   | 2838.9 | 2941.4 | 2982.3 | 2427.4 | 2950.1 | 2985   | 3012.7 | 3338.5 | 0.134077869 | 2797.5   | 3071.575 | 274.075  | 0.910770533 | 0.1348   | 1.1    |
| 101965_at   | 648.5  | 738    | 674.4  | 693.7  | 784.7  | 525.6  | 1024.4 | 617.3  | 0.685464483 | 688.65   | 738      | 49.35    | 0.933130081 | 0.8052   | 1.039  |
| 101966_s_at | 542.5  | 402.3  | 407.8  | 435.3  | 297.8  | 470.8  | 554.5  | 479.8  | 0.955144021 | 446.975  | 450.725  | 3.75     | 0.991680071 | 0.9517   | -1.01  |
| 101967_at   | 250.5  | 184.6  | 126.7  | 184.4  | 171.8  | 257.9  | 183.8  | 209.8  | 0.566937603 | 186.55   | 205.825  | 19.275   | 0.906352484 | 0.5155   | 1.121  |
| 101968_at   | 172.5  | 176.7  | 182.6  | 164.6  | 163.1  | 187.7  | 152    | 178.8  | 0.695024063 | 174.1    | 170.4    | 3.7      | 1.021713615 | 0.6597   | -1.024 |
| 101969_at   | 515.2  | 520    | 515.9  | 527.5  | 496.2  | 394.7  | 461.1  | 416.4  | 0.040946214 | 519.65   | 442.1    | 77.55    | 1.175412803 | 0.01824  | -1.18  |
| 101970_at   | 164    | 11.5   | 38.2   | 108.9  | 15.1   | 153.4  | 10.8   | 39.9   | 0.610467819 | 80.65    | 54.8     | 25.85    | 1.471715328 | 0.5634   | -1.672 |
| 101971_at   | 6418.2 | 5298   | 5161.7 | 4414.5 | 5029.9 | 4874   | 3702.8 | 4162.6 | 0.143220643 | 5323.1   | 4442.325 | 880.775  | 1.198268924 | 0.1376   | -1.197 |
| 101972_at   | 12.9   | 13.2   | 10     | 7.7    | 13.4   | 12.5   | 15.8   | 8.7    | 0.434180061 | 10.95    | 12.6     | 1.65     | 0.869047619 | 0.4602   | 1.15   |
| 101973_at   | 1280.2 | 1400   | 2100.6 | 2612.2 | 1106.2 | 1002.6 | 1580.5 | 1395.8 | 0.163459433 | 1848.25  | 1271.275 | 576.975  | 1.453855381 | 0.1299   | -1.416 |
| 101975_at   | 6551   | 9414.9 | 9795.8 | 8049.6 | 6657.5 | 8186.5 | 6911   | 8627.3 | 0.372909381 | 8452.825 | 7595.575 | 857.25   | 1.112861765 | 0.3992   | -1.106 |
| 101976_at   | 1505.5 | 1543.9 | 1408.1 | 1366.2 | 1739.5 | 1335.8 | 1467.2 | 1425   | 0.726642852 | 1455.925 | 1491.875 | 35.95    | 0.975902807 | 0.7541   | 1.021  |
| 101977_at   | 1580.6 | 1267   | 2098.7 | 1601.1 | 1170   | 1176.6 | 1225.8 | 1269.6 | 0.088016796 | 1636.85  | 1210.5   | 426.35   | 1.352209831 | 0.03449  | -1.331 |
| 101978_at   | 343.4  | 295.8  | 305.9  | 297.4  | 281.7  | 322.7  | 263.2  | 276.3  | 0.198331003 | 310.625  | 285.975  | 24.65    | 1.086196346 | 0.1847   | -1.087 |
| 101979_at   | 153.4  | 145.8  | 117.1  | 192.4  | 151.3  | 163.7  | 122.3  | 186.6  | 0.859188078 | 152.175  | 155.975  | 3.8      | 0.975637121 | 0.8386   | 1.029  |
| 101980_at   | 157.9  | 154.4  | 181.4  | 151.1  | 170.4  | 242.7  | 185    | 167.5  | 0.185678058 | 161.2    | 191.4    | 30.2     | 0.842215256 | 0.1383   | 1.177  |
| 101981_at   | 269.7  | 292.7  | 332.7  | 235.7  | 142.7  | 252.3  | 289.7  | 255    | 0.261503589 | 282.7    | 234.925  | 47.775   | 1.203362775 | 0.2702   | -1.235 |
| 101982_at   | 733.6  | 817.1  | 1328.9 | 1298.9 | 725.7  | 766    | 841.3  | 905    | 0.231405847 | 1044.625 | 809.5    | 235.125  | 1.290457072 | 0.2167   | -1.25  |
| 101984_at   | 3989.7 | 4625.3 | 3197   | 2513.5 | 4163.9 | 3843.7 | 2851.8 | 3206.4 | 0.910248939 | 3581.375 | 3516.45  | 64.925   | 1.018463223 | 0.984    | -1.003 |
| 101985_at   | 46.2   | 33.5   | 25     | 47     | 42.6   | 46.7   | 7.8    | 31.9   | 0.602569236 | 37.925   | 32.25    | 5.675    | 1.175968992 | 0.4899   | -1.385 |
| 101989_at   | 2281.4 | 2123.5 | 2266.7 | 2160.7 | 2071.1 | 1782   | 1765.7 | 1895.3 | 0.010764413 | 2208.075 | 1878.525 | 329.55   | 1.175430191 | 0.007099 | -1.177 |
| 101990_at   | 2190.5 | 3502.5 | 1956.1 | 2322.4 | 3618.4 | 3085.5 | 2850.7 | 2359.4 | 0.307764842 | 2492.875 | 2978.5   | 485.625  | 0.836956522 | 0.262    | 1.212  |
| 101991_at   | 239.5  | 236.3  | 230.6  | 231.3  | 262.4  | 308.4  | 291.5  | 273.3  | 0.014371366 | 234.425  | 283.9    | 49.475   | 0.825730891 | 0.002065 | 1.209  |
| 101992_at   | 3852.5 | 4757.1 | 3304.6 | 3978.3 | 5040.1 | 5193.5 | 3964.7 | 3837.9 | 0.292258523 | 3973.125 | 4509.05  | 535.925  | 0.881144587 | 0.2912   | 1.134  |
| 101993_at   | 93.1   | 51.9   | 85.9   | 117.9  | 73.6   | 105.5  | 198.8  | 181.4  | 0.181836686 | 87.2     | 139.825  | 52.625   | 0.623636689 | 0.1852   | 1.546  |
| 101995_at   | 2968.2 | 3004.6 | 2351.8 | 2296.7 | 2409.9 | 2235.9 | 2178.1 | 2146.9 | 0.11723296  | 2655.325 | 2242.7   | 412.625  | 1.183985821 | 0.07996  | -1.176 |
| 101996_at   | 362.7  | 424    | 436.8  | 423.9  | 519.1  | 419.2  | 508.3  | 475.7  | 0.05256893  | 411.85   | 480.575  | 68.725   | 0.856994226 | 0.0534   | 1.166  |
| 101997_at   | 619.1  | 707.3  | 634.4  | 612.5  | 655.8  | 725.1  | 655.9  | 545.1  | 0.962247805 | 643.325  | 645.475  | 2.15     | 0.99666912  | 0.9974   | 1      |
| 101998_at   | 619.4  | 692.8  | 566.1  | 688.8  | 832.1  | 632.3  | 671    | 837.8  | 0.162860547 | 641.775  | 743.3    | 101.525  | 0.863413158 | 0.1536   | 1.153  |
| 102000_f_at | 2532.9 | 3027.7 | 2069.6 | 2144   | 2942.6 | 2742   | 2189.2 | 2298.2 | 0.738035615 | 2443.55  | 2543     | 99.45    | 0.960892646 | 0.7076   | 1.045  |
| 102001_at   | 800.9  | 630.5  | 832.1  | 771.1  | 724.7  | 724.4  | 832.3  | 823.6  | 0.755372279 | 758.65   | 776.25   | 17.6     | 0.977326892 | 0.7315   | 1.027  |
| 102002_at   | 162.5  | 202    | 411.7  | 479.5  | 189    | 215.1  | 274.9  | 280.7  | 0.418869606 | 313.925  | 239.925  | 74       | 1.308429718 | 0.5435   | -1.199 |
| 102003_at   | 463.6  | 387.9  | 419.9  | 574.8  | 405    | 424.8  | 534.5  | 491.8  | 0.962729825 | 461.55   | 464.025  | 2.475    | 0.994666236 | 0.927    | 1.01   |
| 102004_at   | 145.8  | 78.5   | 213.5  | 207.1  | 123.9  | 184.3  | 187.5  | 211.7  | 0.687913291 | 161.225  | 176.85   | 15.625   | 0.91164829  | 0.5957   | 1.157  |
| 102007_at   | 98.4   | 104.1  | 102.1  | 147.7  | 108    | 112.6  | 102.9  | 101.1  | 0.597693419 | 113.075  | 106.15   | 6.925    | 1.065237871 | 0.626    | -1.051 |
| 102009_at   | 108    | 95.7   | 120.1  | 156.8  | 94.5   | 116.7  | 80.3   | 121.6  | 0.345368022 | 120.15   | 103.275  | 16.875   | 1.163398693 | 0.3398   | -1.16  |
| 102010_at   | 17.3   | 26.8   | 9.1    | 5.1    | 22.6   | 16.3   | 19.7   | 24.7   | 0.292965625 | 14.575   | 20.825   | 6.25     | 0.699879952 | 0.2069   | 1.704  |
| 102011_at   | 213.8  | 180.8  | 207.7  | 236.6  | 218.1  | 212.1  | 207.5  | 178.4  | 0.708084695 | 209.725  | 204.025  | 5.7      | 1.027937753 | 0.7301   | -1.026 |
| 102012_at   | 845    | 771.5  | 786.5  | 737.8  | 1104.9 | 1127.5 | 986.6  | 1025.6 | 0.000786266 | 785.2    | 1061.15  | 275.95   | 0.739951939 | 0.000382 | 1.351  |
| 102013_at   | 9.5    | 11.4   | 4.9    | 7.2    | 3.2    | 11.6   | 5.5    | 5.6    | 0.467925831 | 8.25     | 6.475    | 1.775    | 1.274131274 | 0.3884   | -1.351 |



|             |        |        |        |        |        |        |        |        |             |          |          |         |             |         |        |
|-------------|--------|--------|--------|--------|--------|--------|--------|--------|-------------|----------|----------|---------|-------------|---------|--------|
| 102014_at   | 284.5  | 282.3  | 235.6  | 256.4  | 271.1  | 281.3  | 222.4  | 331.6  | 0.658993942 | 264.7    | 276.6    | 11.9    | 0.956977585 | 0.7066  | 1.038  |
| 102015_at   | 143.3  | 113.7  | 125.9  | 125.8  | 93.1   | 103.8  | 132    | 100.2  | 0.111642193 | 127.175  | 107.275  | 19.9    | 1.185504544 | 0.09698 | -1.192 |
| 102016_at   | 2.7    | 2.4    | 3.6    | 2.6    | 1      | 5.9    | 1.9    | 3.1    | 0.899121645 | 2.825    | 2.975    | 0.15    | 0.949579832 | 0.7413  | -1.142 |
| 102017_at   | 253    | 228.5  | 309.7  | 378    | 256.6  | 322.9  | 348.4  | 427.2  | 0.374680804 | 292.3    | 338.775  | 46.475  | 0.862814552 | 0.366   | 1.162  |
| 102018_at   | 262.3  | 229.2  | 464.2  | 380    | 244    | 315.6  | 227.9  | 232.2  | 0.246913239 | 333.925  | 254.925  | 79      | 1.309895067 | 0.2316  | -1.27  |
| 102019_at   | 1443.6 | 1562.9 | 1262   | 1305   | 1649.4 | 1284.8 | 1465.5 | 1340.5 | 0.708027451 | 1393.375 | 1435.05  | 41.675  | 0.9709592   | 0.713   | 1.029  |
| 102020_at   | 38.1   | 43.1   | 158.3  | 13.5   | 95.9   | 166.8  | 104.6  | 71.5   | 0.277498365 | 63.25    | 109.7    | 46.45   | 0.57657247  | 0.1495  | 2.417  |
| 102021_at   | 196.3  | 173    | 119.6  | 79.2   | 149.7  | 194.9  | 174.8  | 137.2  | 0.489907859 | 142.025  | 164.15   | 22.125  | 0.865214743 | 0.4085  | 1.214  |
| 102022_at   | 466.5  | 538.4  | 369.1  | 386.9  | 594.2  | 569.2  | 479.8  | 456.2  | 0.15211904  | 440.225  | 524.85   | 84.625  | 0.838763456 | 0.1451  | 1.199  |
| 102024_at   | 133.8  | 126.9  | 110.2  | 152.1  | 127.2  | 153.9  | 96.6   | 123.9  | 0.72722021  | 130.75   | 125.4    | 5.35    | 1.042663477 | 0.6912  | -1.05  |
| 102025_at   | 42.1   | 3.9    | 24.6   | 17.9   | 15     | 27.8   | 16.4   | 21.6   | 0.831503101 | 22.125   | 20.2     | 1.925   | 1.09529703  | 0.749   | 1.193  |
| 102026_s_at | 139    | 123.6  | 92.4   | 148.9  | 113.7  | 167.3  | 118.4  | 140    | 0.627876663 | 125.975  | 134.85   | 8.875   | 0.934186133 | 0.6208  | 1.074  |
| 102027_s_at | 1154.5 | 952.6  | 810.3  | 971    | 947    | 1196.5 | 793.1  | 960.7  | 0.984414569 | 972.1    | 974.325  | 2.225   | 0.997716368 | 0.996   | 1.001  |
| 102028_at   | 627.1  | 602    | 590.9  | 529.9  | 548.1  | 496.5  | 609    | 605.8  | 0.529360342 | 587.475  | 564.85   | 22.625  | 1.040054882 | 0.5231  | -1.042 |
| 102029_at   | 104.8  | 102.1  | 100.3  | 85.7   | 85.1   | 139.6  | 112.5  | 99.2   | 0.431287479 | 98.225   | 109.1    | 10.875  | 0.900320807 | 0.4543  | 1.096  |
| 102030_at   | 82.6   | 57.3   | 75.9   | 82.1   | 44.9   | 75.7   | 127.4  | 106.8  | 0.499614847 | 74.475   | 88.7     | 14.225  | 0.839627959 | 0.6619  | 1.119  |
| 102031_at   | 82.9   | 52.9   | 77.2   | 87.6   | 108    | 65.6   | 84.8   | 67.1   | 0.638319717 | 75.15    | 81.375   | 6.225   | 0.923502304 | 0.6548  | 1.08   |
| 102032_at   | 996.1  | 1118.7 | 1091.4 | 1136.8 | 993.4  | 977.2  | 1235.2 | 1323.2 | 0.642285978 | 1085.75  | 1132.25  | 46.5    | 0.958931331 | 0.6896  | 1.035  |
| 102033_at   | 294.2  | 341.3  | 513    | 500.7  | 360.7  | 303.3  | 363.3  | 375.8  | 0.354826295 | 412.3    | 350.775  | 61.525  | 1.175397334 | 0.389   | -1.146 |
| 102035_at   | 303.8  | 254.5  | 276.9  | 241.1  | 242.4  | 267    | 320    | 230.1  | 0.868547663 | 269.075  | 264.875  | 4.2     | 1.015856536 | 0.828   | -1.02  |
| 102036_at   | 258    | 183.4  | 177.1  | 173    | 218    | 218.1  | 182.3  | 238.2  | 0.516748533 | 197.875  | 214.15   | 16.275  | 0.924001868 | 0.4498  | 1.092  |
| 102037_at   | 102.9  | 53.5   | 139.9  | 195.4  | 101.6  | 154.7  | 190.7  | 174.8  | 0.402742087 | 122.925  | 155.45   | 32.525  | 0.790768736 | 0.3514  | 1.366  |
| 102038_at   | 39     | 43.4   | 48.3   | 42.5   | 52.6   | 55.4   | 40.6   | 52.3   | 0.130222225 | 43.3     | 50.225   | 6.925   | 0.862120458 | 0.1319  | 1.155  |
| 102039_at   | 1000.1 | 875    | 795.1  | 722    | 807.6  | 933.3  | 645.7  | 875.5  | 0.718562034 | 848.05   | 815.525  | 32.525  | 1.039882284 | 0.7118  | -1.042 |
| 102040_at   | 541.8  | 560.4  | 594.2  | 675.3  | 584.2  | 382.9  | 512.8  | 550.9  | 0.166431323 | 592.925  | 507.7    | 85.225  | 1.167864881 | 0.1708  | -1.178 |
| 102041_at   | 23.8   | 23.5   | 20.6   | 20.8   | 6.2    | 33.7   | 4.9    | 27.4   | 0.614485697 | 22.175   | 18.05    | 4.125   | 1.228531856 | 0.3248  | -1.702 |
| 102042_at   | 380    | 286    | 273.8  | 274.6  | 216.2  | 337.9  | 284.7  | 293.4  | 0.587801949 | 303.6    | 283.05   | 20.55   | 1.072602014 | 0.5717  | -1.076 |
| 102043_at   | 313    | 241.8  | 253.5  | 302.6  | 285    | 351.2  | 334.8  | 310.2  | 0.113333012 | 277.725  | 320.3    | 42.575  | 0.86707774  | 0.1134  | 1.157  |
| 102044_at   | 1506.3 | 1329.6 | 1691.3 | 1639   | 1252.5 | 1114.7 | 1846.9 | 1600   | 0.656724196 | 1541.55  | 1453.525 | 88.025  | 1.060559674 | 0.5792  | -1.077 |
| 102046_at   | 227.6  | 244.7  | 363.2  | 341    | 295.2  | 309.9  | 306    | 275.6  | 0.945821965 | 294.125  | 296.675  | 2.55    | 0.991404736 | 0.8235  | 1.028  |
| 102047_at   | 1211.5 | 1329.1 | 1180.4 | 1035.7 | 1382.7 | 1105.8 | 1160.1 | 1108.6 | 0.998927464 | 1189.175 | 1189.3   | 0.125   | 0.999894896 | 0.997   | 1      |
| 102048_at   | 4.2    | 2.9    | 7      | 8.5    | 11.5   | 12.3   | 2.7    | 17.9   | 0.183903984 | 5.65     | 11.1     | 5.45    | 0.509009009 | 0.2915  | 1.755  |
| 102049_at   | 168.3  | 124.1  | 112.8  | 109.6  | 212.8  | 159.8  | 112.6  | 135.8  | 0.343047739 | 128.7    | 155.25   | 26.55   | 0.828985507 | 0.3346  | 1.191  |
| 102050_at   | 10.3   | 9.2    | 7.6    | 9.6    | 7.1    | 10.4   | 7.4    | 30.8   | 0.464890785 | 9.175    | 13.925   | 4.75    | 0.658886894 | 0.5508  | 1.247  |
| 102052_at   | 361.8  | 367.2  | 343.1  | 394.2  | 298.3  | 267.1  | 295.1  | 347.3  | 0.021571198 | 366.575  | 301.95   | 64.625  | 1.214025501 | 0.01817 | -1.218 |
| 102053_at   | 24.1   | 62.3   | 47     | 56.6   | 56.9   | 55     | 71.6   | 56.1   | 0.248754034 | 47.5     | 59.9     | 12.4    | 0.792988314 | 0.2448  | 1.332  |
| 102054_at   | 918.5  | 789.9  | 729.4  | 570.1  | 689    | 823.8  | 800.4  | 779.2  | 0.800248494 | 751.975  | 773.1    | 21.125  | 0.972674945 | 0.7221  | 1.041  |
| 102056_f_at | 822.9  | 952.1  | 930.1  | 1130.8 | 977.9  | 644.2  | 964.2  | 949.2  | 0.492444417 | 958.975  | 883.875  | 75.1    | 1.084966766 | 0.4858  | -1.093 |
| 102057_r_at | 60.7   | 44.9   | 61.4   | 88.4   | 59.6   | 133.7  | 109.4  | 68.7   | 0.205217004 | 63.85    | 92.85    | 29      | 0.687668282 | 0.1886  | 1.418  |
| 102058_at   | 529.2  | 482.3  | 542.8  | 440.2  | 512.1  | 515.6  | 343    | 414    | 0.325279944 | 498.625  | 446.175  | 52.45   | 1.117554771 | 0.3051  | -1.129 |
| 102059_at   | 306.9  | 439.7  | 378.2  | 322.7  | 477    | 400.6  | 498    | 333.3  | 0.226348215 | 361.875  | 427.225  | 65.35   | 0.847036105 | 0.23    | 1.178  |
| 102060_at   | 706.7  | 632.6  | 743.7  | 821.4  | 657.9  | 783.8  | 854.7  | 811.2  | 0.412663329 | 726.1    | 776.9    | 50.8    | 0.934611919 | 0.4243  | 1.07   |
| 102061_at   | 391.6  | 587.9  | 508.6  | 618.1  | 864.8  | 461.4  | 507.8  | 501.3  | 0.61709501  | 526.55   | 583.825  | 57.275  | 0.901896973 | 0.6479  | 1.088  |
| 102062_at   | 903    | 1029.5 | 965.4  | 1197.7 | 760.6  | 622    | 1031.4 | 1034.5 | 0.2375711   | 1023.9   | 862.125  | 161.775 | 1.187646803 | 0.2207  | -1.208 |
| 102063_at   | 122.4  | 150.7  | 169.1  | 140.2  | 124.8  | 123.2  | 127.3  | 121.5  | 0.115354431 | 145.6    | 124.2    | 21.4    | 1.172302738 | 0.06755 | -1.165 |
| 102064_at   | 33.3   | 41.4   | 22.4   | 16.8   | 37.4   | 43.9   | 34.6   | 20.7   | 0.470407683 | 28.475   | 34.15    | 5.675   | 0.833821376 | 0.457   | 1.228  |
| 102065_at   | 32     | 46.9   | 57.9   | 52.5   | 50.1   | 67.2   | 85     | 71     | 0.062940873 | 47.325   | 68.325   | 21      | 0.692645445 | 0.07075 | 1.453  |
| 102069_at   | 835.4  | 661    | 407.9  | 768.6  | 515.4  | 624.4  | 643.9  | 912.3  | 0.965005734 | 668.225  | 674      | 5.775   | 0.991431751 | 0.916   | 1.022  |
| 102070_at   | 279.1  | 255.1  | 241    | 341.9  | 275    | 379.7  | 253.2  | 327.5  | 0.444807456 | 279.275  | 308.85   | 29.575  | 0.904241541 | 0.4429  | 1.102  |
| 102071_at   | 811.6  | 711.5  | 854.2  | 731.4  | 671    | 935.6  | 691.5  | 745.2  | 0.822767391 | 777.175  | 760.825  | 16.35   | 1.02148983  | 0.7634  | -1.028 |
| 102072_g_at | 764.5  | 636.7  | 863.3  | 879.9  | 763.8  | 644.5  | 698.1  | 802.3  | 0.412353221 | 786.1    | 727.175  | 58.925  | 1.081032764 | 0.4407  | -1.076 |
| 102073_at   | 23.7   | 12.5   | 11.2   | 14.9   | 14.2   | 15.4   | 5.2    | 14.2   | 0.401753787 | 15.575   | 12.25    | 3.325   | 1.271428571 | 0.3947  | -1.326 |
| 102074_at   | 128.7  | 78.2   | 73     | 65.7   | 80.6   | 146.5  | 72.8   | 81.1   | 0.706612521 | 86.4     | 95.25    | 8.85    | 0.907086614 | 0.6879  | 1.096  |
| 102075_at   | 5.4    | 6      | 4.6    | 12.8   | 2.9    | 5.4    | 2.2    | 16.6   | 0.916460888 | 7.2      | 6.775    | 0.425   | 1.062730627 | 0.5705  | -1.351 |
| 102076_at   | 129.6  | 82.1   | 82.6   | 82.7   | 85     | 156    | 18.1   | 29.1   | 0.54776362  | 94.25    | 72.05    | 22.2    | 1.308119362 | 0.2895  | -1.797 |
| 102077_at   | 26.6   | 35.3   | 23.9   | 28.6   | 33.2   | 35.9   | 34.5   | 37     | 0.068569112 | 28.6     | 35.15    | 6.55    | 0.813655761 | 0.04561 | 1.24   |



|             |         |         |         |         |         |         |         |         |             |           |          |          |             |          |        |
|-------------|---------|---------|---------|---------|---------|---------|---------|---------|-------------|-----------|----------|----------|-------------|----------|--------|
| 102078_at   | 22      | 2.7     | 3.9     | 6       | 10.8    | 29.9    | 5.9     | 5.7     | 0.567184775 | 8.65      | 13.075   | 4.425    | 0.661567878 | 0.4246   | 1.671  |
| 102079_at   | 24.3    | 16.8    | 10.9    | 19.7    | 13.8    | 15.1    | 16.5    | 18.9    | 0.572907271 | 17.925    | 16.075   | 1.85     | 1.115085537 | 0.6958   | -1.077 |
| 102080_at   | 118.8   | 82.4    | 30.5    | 74      | 39.4    | 111.7   | 54      | 107.3   | 0.950403256 | 76.425    | 78.1     | 1.675    | 0.978553137 | 0.9291   | 1.037  |
| 102081_at   | 54      | 53.1    | 27.6    | 37.4    | 9.8     | 51.2    | 54.3    | 56.2    | 0.991113828 | 43.025    | 42.875   | 0.15     | 1.003498542 | 0.7318   | -1.177 |
| 102082_at   | 15      | 11.2    | 8.9     | 6.3     | 4.9     | 7.7     | 7.7     | 6.6     | 0.142653431 | 10.35     | 6.725    | 3.625    | 1.539033457 | 0.1086   | -1.489 |
| 102083_at   | 119.2   | 76.1    | 58.4    | 78      | 73.3    | 113.6   | 64.9    | 92      | 0.863314211 | 82.925    | 85.95    | 3.025    | 0.964805119 | 0.8205   | 1.047  |
| 102084_f_at | 36.3    | 35.5    | 66.3    | 133.1   | 95.4    | 82.4    | 58      | 99      | 0.555515067 | 67.8      | 83.7     | 15.9     | 0.810035842 | 0.3431   | 1.412  |
| 102085_at   | 26.4    | 10      | 30.8    | 18.8    | 22.7    | 15.8    | 6.5     | 35.3    | 0.857720688 | 21.5      | 20.075   | 1.425    | 1.070983811 | 0.7355   | -1.168 |
| 102086_r_at | 7       | 2       | 2.3     | 3.6     | 6.5     | 2.8     | 6.3     | 9.1     | 0.206622474 | 3.725     | 6.175    | 2.45     | 0.603238866 | 0.2029   | 1.72   |
| 102087_at   | 61.7    | 37.3    | 30.3    | 16      | 51.4    | 83.4    | 52.7    | 16      | 0.422677127 | 36.325    | 50.875   | 14.55    | 0.714004914 | 0.5353   | 1.344  |
| 102088_at   | 17.5    | 9.1     | 31.4    | 44.2    | 39.2    | 64.2    | 57.7    | 44.3    | 0.039864524 | 25.55     | 51.35    | 25.8     | 0.497565725 | 0.06015  | 2.324  |
| 102089_at   | 8.7     | 4.2     | 2.7     | 4.5     | 33      | 21.5    | 19.9    | 20      | 0.005614216 | 5.025     | 23.6     | 18.575   | 0.212923729 | 0.000973 | 5.018  |
| 102090_f_at | 149     | 163     | 129.6   | 181.6   | 174.6   | 165.3   | 177     | 166.2   | 0.269315295 | 155.8     | 170.775  | 14.975   | 0.912311521 | 0.2275   | 1.104  |
| 102091_f_at | 71.6    | 78      | 62.6    | 84.4    | 98.6    | 109.1   | 91.5    | 103.3   | 0.004886263 | 74.15     | 100.625  | 26.475   | 0.73689441  | 0.005821 | 1.362  |
| 102092_s_at | 7.1     | 6.3     | 5       | 13.2    | 42.9    | 8.5     | 10.5    | 14      | 0.26462109  | 7.9       | 18.975   | 11.075   | 0.416337286 | 0.1304   | 2.073  |
| 102093_f_at | 233.7   | 227.4   | 277.9   | 335.1   | 233.1   | 159.6   | 261.4   | 262.7   | 0.300272477 | 268.525   | 229.2    | 39.325   | 1.171575044 | 0.3059   | -1.18  |
| 102094_f_at | 8649.9  | 8710.4  | 6614.5  | 8455.7  | 8007.7  | 8703.5  | 10377.5 | 7990.1  | 0.412913926 | 8107.625  | 8769.7   | 662.075  | 0.924504259 | 0.4149   | 1.082  |
| 102095_f_at | 83.5    | 132.3   | 128.2   | 127.2   | 81.7    | 89.8    | 95.5    | 91.6    | 0.088180556 | 117.8     | 89.65    | 28.15    | 1.313998885 | 0.065    | -1.294 |
| 102096_f_at | 8.8     | 8.5     | 7.6     | 7       | 5.2     | 17.3    | 20.9    | 5.1     | 0.386091733 | 7.975     | 12.125   | 4.15     | 0.657731959 | 0.5865   | 1.246  |
| 102097_f_at | 219.6   | 276.9   | 131     | 195.6   | 237.6   | 230.7   | 215.9   | 170.8   | 0.823689198 | 205.775   | 213.75   | 7.975    | 0.962690058 | 0.7202   | 1.067  |
| 102098_at   | 14262.3 | 18941.4 | 11806.5 | 13145   | 15656.8 | 15127.6 | 12387.9 | 14157.9 | 0.909478514 | 14538.8   | 14332.55 | 206.25   | 1.014390321 | 0.9843   | 1.002  |
| 102099_f_at | 320.4   | 422.8   | 415.1   | 463.4   | 492.2   | 326.6   | 385.3   | 381.5   | 0.851014191 | 405.425   | 396.4    | 9.025    | 1.022767407 | 0.8403   | 1.025  |
| 102100_f_at | 363.5   | 300.4   | 259     | 330.4   | 297.2   | 315.1   | 252.4   | 261.9   | 0.286222044 | 313.325   | 281.65   | 31.675   | 1.112462276 | 0.292    | -1.108 |
| 102101_f_at | 203.1   | 114.6   | 109.3   | 115.6   | 129.4   | 152.3   | 115.1   | 91.9    | 0.625595535 | 135.65    | 122.175  | 13.475   | 1.110292613 | 0.6522   | -1.09  |
| 102102_at   | 41.3    | 41.3    | 50.7    | 56      | 42.4    | 53.3    | 64.8    | 59.9    | 0.250385678 | 47.325    | 55.1     | 7.775    | 0.858892922 | 0.2613   | 1.16   |
| 102103_f_at | 7744    | 8729.7  | 5277.5  | 5408.2  | 7194.2  | 7178.2  | 5979.5  | 6150.9  | 0.86729725  | 6789.85   | 6625.7   | 164.15   | 1.024774741 | 0.9778   | 1.004  |
| 102104_f_at | 51.7    | 80.4    | 62.2    | 63.4    | 96.3    | 66.8    | 85.1    | 71.4    | 0.135552428 | 64.425    | 79.9     | 15.475   | 0.806320401 | 0.1278   | 1.242  |
| 102105_f_at | 4371.9  | 6217.3  | 3014.5  | 2897.8  | 4872    | 2805.5  | 1939.6  | 2700.4  | 0.33578992  | 4125.375  | 3079.375 | 1046     | 1.339679318 | 0.2957   | -1.35  |
| 102106_at   | 94.7    | 38.4    | 35.5    | 73.5    | 48      | 67.8    | 54.2    | 47.9    | 0.710025717 | 60.525    | 54.475   | 6.05     | 1.111060119 | 0.9141   | -1.029 |
| 102107_at   | 54      | 52.2    | 28.6    | 75.8    | 63      | 70.2    | 62.4    | 71      | 0.243982988 | 52.65     | 66.65    | 14       | 0.789947487 | 0.2059   | 1.338  |
| 102108_f_at | 787.3   | 1121.2  | 1143.3  | 1510.1  | 1054.8  | 590.3   | 1181    | 1128.3  | 0.477172435 | 1140.475  | 988.6    | 151.875  | 1.15362634  | 0.496    | -1.164 |
| 102109_at   | 23745.7 | 24231   | 14234.8 | 15689.4 | 18145.6 | 17367.1 | 17206.9 | 17304.4 | 0.508181471 | 19475.225 | 17506    | 1969.225 | 1.112488575 | 0.5911   | -1.082 |
| 102110_at   | 64.9    | 31.2    | 28.4    | 45.8    | 36.9    | 73.4    | 47.9    | 57.1    | 0.361353348 | 42.575    | 53.825   | 11.25    | 0.790989317 | 0.3214   | 1.294  |
| 102111_f_at | 206.2   | 87.8    | 70.9    | 106.2   | 85.9    | 179     | 101.3   | 126.6   | 0.887585772 | 117.775   | 123.2    | 5.425    | 0.955965909 | 0.7525   | 1.097  |
| 102112_s_at | 424.4   | 410.6   | 378.3   | 349.5   | 303.2   | 370.9   | 331.4   | 297     | 0.03391355  | 390.7     | 325.625  | 65.075   | 1.199846449 | 0.03352  | -1.201 |
| 102113_f_at | 643.7   | 635.1   | 499.8   | 457.9   | 545.7   | 608     | 517.7   | 339.3   | 0.478233269 | 559.125   | 502.675  | 56.45    | 1.112299199 | 0.4709   | -1.126 |
| 102114_f_at | 495.3   | 454.9   | 438.5   | 387.5   | 431.4   | 560.4   | 416.3   | 439.1   | 0.674954772 | 444.05    | 461.8    | 17.75    | 0.961563447 | 0.6873   | 1.036  |
| 102115_r_at | 119.3   | 153.8   | 106.2   | 131.4   | 116.1   | 174.5   | 139.1   | 149.5   | 0.320742434 | 127.675   | 144.8    | 17.125   | 0.881733425 | 0.3218   | 1.132  |
| 102116_f_at | 47.6    | 41.2    | 35.4    | 32.5    | 63.7    | 51      | 46.1    | 37.5    | 0.166159847 | 39.175    | 49.575   | 10.4     | 0.790216843 | 0.1525   | 1.255  |
| 102117_at   | 619.7   | 633.8   | 503.6   | 472.5   | 690.7   | 642.7   | 428.2   | 477.6   | 0.975755807 | 557.4     | 559.8    | 2.4      | 0.995712755 | 0.9593   | -1.007 |
| 102118_at   | 77      | 59.4    | 71.8    | 84.8    | 31.8    | 92.7    | 90      | 74.8    | 0.954047118 | 73.25     | 72.325   | 0.925    | 1.012789492 | 0.7576   | -1.089 |
| 102119_at   | 80.3    | 30      | 8.5     | 6.7     | 5.5     | 68.1    | 10.3    | 33.1    | 0.927330029 | 31.375    | 29.25    | 2.125    | 1.072649573 | 0.9871   | 1.014  |
| 102120_f_at | 378.2   | 411.9   | 364.1   | 391.1   | 513.1   | 218     | 355.3   | 431.9   | 0.921833318 | 386.325   | 379.575  | 6.75     | 1.017783047 | 0.7429   | -1.066 |
| 102121_f_at | 4.2     | 19.1    | 4.4     | 3.6     | 5.6     | 8.1     | 5.3     | 7.4     | 0.768483918 | 7.825     | 6.6      | 1.225    | 1.185606061 | 0.8459   | 1.085  |
| 102122_f_at | 112.5   | 129.2   | 140.1   | 96.7    | 230     | 139.6   | 111.5   | 86.8    | 0.536004144 | 119.625   | 141.975  | 22.35    | 0.842577919 | 0.6265   | 1.121  |
| 102123_at   | 183.2   | 187.5   | 210.6   | 220.8   | 216.8   | 127.8   | 309.7   | 215.5   | 0.684945686 | 200.525   | 217.45   | 16.925   | 0.922166015 | 0.8524   | 1.037  |
| 102124_f_at | 584.4   | 328.9   | 248.5   | 352.3   | 325.3   | 382.1   | 304.8   | 395.1   | 0.743167645 | 378.525   | 351.825  | 26.7     | 1.075890002 | 0.8818   | -1.03  |
| 102125_f_at | 101.3   | 83.1    | 82      | 70.6    | 70.7    | 106.6   | 128.8   | 81      | 0.43378876  | 84.25     | 96.775   | 12.525   | 0.870576079 | 0.4675   | 1.127  |
| 102126_at   | 21580   | 21800.5 | 13947   | 16160.4 | 17134.8 | 16758.2 | 16213   | 17658.4 | 0.522336228 | 18371.975 | 16941.1  | 1430.875 | 1.084461753 | 0.59     | -1.066 |
| 102127_at   | 13.7    | 43.4    | 42.5    | 38.6    | 36.2    | 62.7    | 21.4    | 50.7    | 0.499538816 | 34.55     | 42.75    | 8.2      | 0.808187135 | 0.5475   | 1.261  |
| 102128_f_at | 468.5   | 550.7   | 484.1   | 394.8   | 584.1   | 472.8   | 541.7   | 530.1   | 0.198418767 | 474.525   | 532.175  | 57.65    | 0.891670973 | 0.1943   | 1.126  |
| 102129_at   | 64.6    | 53.8    | 48.9    | 76.5    | 49.4    | 90.4    | 47      | 46.2    | 0.83620316  | 60.95     | 58.25    | 2.7      | 1.046351931 | 0.713    | -1.076 |
| 102130_f_at | 936.6   | 980.2   | 904.5   | 1148.3  | 1207.3  | 1310.9  | 1453.4  | 1118.9  | 0.0229076   | 992.4     | 1272.625 | 280.225  | 0.77980552  | 0.01803  | 1.282  |
| 102131_f_at | 479.9   | 462.6   | 674     | 615.2   | 639.8   | 601.1   | 675.8   | 682.2   | 0.173852852 | 557.925   | 649.725  | 91.8     | 0.858709454 | 0.1419   | 1.178  |
| 102132_i_at | 50.2    | 98      | 30.7    | 59.4    | 15.7    | 84.2    | 71.9    | 48.5    | 0.834840092 | 59.575    | 55.075   | 4.5      | 1.081706764 | 0.7216   | -1.182 |
| 102133_at   | 36.3    | 32.8    | 16.2    | 31      | 11.6    | 29      | 28.5    | 40.4    | 0.82663667  | 29.075    | 27.375   | 1.7      | 1.062100457 | 0.7514   | -1.114 |



|             |        |        |        |        |        |        |        |        |             |         |          |        |             |          |        |
|-------------|--------|--------|--------|--------|--------|--------|--------|--------|-------------|---------|----------|--------|-------------|----------|--------|
| 102134_f_at | 1476.6 | 1777.2 | 1356.2 | 1238.4 | 1539.2 | 1449.2 | 1239.5 | 1414.2 | 0.712688023 | 1462.1  | 1410.525 | 51.575 | 1.0365644   | 0.7493   | -1.03  |
| 102135_at   | 236.5  | 174.1  | 151.6  | 175.9  | 156.9  | 298.9  | 148.6  | 186.2  | 0.752550657 | 184.525 | 197.65   | 13.125 | 0.933594738 | 0.8287   | 1.043  |
| 102136_r_at | 85.8   | 49     | 38.5   | 60.7   | 42.9   | 98.2   | 46.4   | 31.9   | 0.846301837 | 58.5    | 54.85    | 3.65   | 1.066545123 | 0.7127   | -1.12  |
| 102137_f_at | 641.3  | 480.6  | 392.9  | 440.3  | 491.4  | 592.8  | 415    | 480.1  | 0.929521421 | 488.775 | 494.825  | 6.05   | 0.987773455 | 0.8741   | 1.021  |
| 102138_at   | 4.9    | 27.5   | 5.4    | 7.4    | 4.9    | 5.6    | 5.1    | 4.6    | 0.332993969 | 11.3    | 5.05     | 6.25   | 2.237623762 | 0.2341   | -1.698 |
| 102139_at   | 7.2    | 3.5    | 2.5    | 2.3    | 5.8    | 6.2    | 6.8    | 5.6    | 0.144207556 | 3.875   | 6.1      | 2.225  | 0.635245902 | 0.08189  | 1.738  |
| 102140_at   | 97.6   | 70.8   | 54.8   | 33.8   | 55.3   | 77.7   | 42.5   | 57.4   | 0.711174107 | 64.25   | 58.225   | 6.025  | 1.103477888 | 0.8522   | -1.051 |
| 102141_f_at | 334.3  | 473.1  | 409    | 407.8  | 583.6  | 482.3  | 464.9  | 489    | 0.044302583 | 406.05  | 504.95   | 98.9   | 0.804139024 | 0.04454  | 1.248  |
| 102142_r_at | 60.4   | 17.7   | 29     | 38     | 34.3   | 93.9   | 27.8   | 45.1   | 0.460371228 | 36.275  | 50.275   | 14     | 0.721531576 | 0.435    | 1.362  |
| 102143_at   | 391.6  | 292.3  | 175.9  | 298    | 176.7  | 366.4  | 255.3  | 295.9  | 0.798097248 | 289.45  | 273.575  | 15.875 | 1.058027963 | 0.8295   | -1.052 |
| 102144_f_at | 113.5  | 152    | 263.6  | 322    | 157.5  | 129.6  | 260.4  | 237.9  | 0.786763869 | 212.775 | 196.35   | 16.425 | 1.083651642 | 0.9047   | -1.037 |
| 102145_f_at | 74.3   | 68.4   | 60.5   | 67.8   | 40.8   | 17.9   | 18.4   | 86.7   | 0.195558263 | 67.75   | 40.95    | 26.8   | 1.654456654 | 0.1051   | -2.058 |
| 102146_at   | 61.3   | 18.1   | 30     | 68.9   | 63.3   | 36     | 72.4   | 13.7   | 0.925027849 | 44.575  | 46.35    | 1.775  | 0.961704423 | 0.9954   | 1.003  |
| 102147_at   | 60.5   | 24     | 49.6   | 12.8   | 42     | 36.4   | 28.2   | 24.9   | 0.76001275  | 36.725  | 32.875   | 3.85   | 1.117110266 | 0.9218   | 1.039  |
| 102148_f_at | 114.6  | 125.5  | 101.8  | 152.1  | 75.7   | 153.1  | 98     | 100    | 0.42923392  | 123.5   | 106.7    | 16.8   | 1.157450797 | 0.3561   | -1.184 |
| 102149_f_at | 17.9   | 13.1   | 7.9    | 15.4   | 8.7    | 48.8   | 12.8   | 14.3   | 0.479839285 | 13.575  | 21.15    | 7.575  | 0.641843972 | 0.5708   | 1.281  |
| 102150_f_at | 61.9   | 15.7   | 25.7   | 29.2   | 53.5   | 53.7   | 65.4   | 13.3   | 0.413317858 | 33.125  | 46.475   | 13.35  | 0.71274879  | 0.5317   | 1.36   |
| 102151_at   | 156.9  | 183.9  | 140    | 134.9  | 99.9   | 122.1  | 34.2   | 39.6   | 0.026702707 | 153.925 | 73.95    | 79.975 | 2.081473969 | 0.03765  | -2.396 |
| 102152_f_at | 568    | 406.3  | 377.5  | 486.9  | 415.8  | 667.1  | 436.7  | 471.9  | 0.615340479 | 459.675 | 497.875  | 38.2   | 0.923273914 | 0.6155   | 1.077  |
| 102153_at   | 13.9   | 71.1   | 10.8   | 54.4   | 65.5   | 52.6   | 21.2   | 39.5   | 0.70269579  | 37.55   | 44.7     | 7.15   | 0.840044743 | 0.4825   | 1.491  |
| 102154_f_at | 9.5    | 4.2    | 9.9    | 10.9   | 8.2    | 27.5   | 13.6   | 6.7    | 0.346620314 | 8.625   | 14       | 5.375  | 0.616071429 | 0.3519   | 1.477  |
| 102155_f_at | 31     | 26.9   | 4.4    | 12.6   | 7.9    | 13.3   | 11.4   | 8.6    | 0.268276046 | 18.725  | 10.3     | 8.425  | 1.817961165 | 0.444    | -1.46  |
| 102156_f_at | 102.3  | 95.7   | 60.3   | 47.6   | 71.8   | 103.9  | 63     | 72.1   | 0.942067925 | 76.475  | 77.7     | 1.225  | 0.984234234 | 0.8323   | 1.048  |
| 102157_f_at | 3.2    | 5.3    | 6.3    | 3.7    | 3.2    | 7.1    | 4.2    | 5.5    | 0.746485218 | 4.625   | 5        | 0.375  | 0.925       | 0.7581   | 1.077  |
| 102158_at   | 88.6   | 77.8   | 68.1   | 82.2   | 68.4   | 122.3  | 62.1   | 85.6   | 0.723545949 | 79.175  | 84.6     | 5.425  | 0.935874704 | 0.8319   | 1.036  |
| 102159_at   | 21.4   | 10.2   | 43.4   | 31.2   | 9.9    | 44.9   | 40.8   | 39.3   | 0.527718428 | 26.55   | 33.725   | 7.175  | 0.787249815 | 0.6608   | 1.245  |
| 102160_at   | 56.2   | 22.7   | 36.4   | 21.9   | 24.4   | 33.8   | 17.3   | 17.4   | 0.277204627 | 34.3    | 23.225   | 11.075 | 1.476856835 | 0.2471   | -1.422 |
| 102161_f_at | 404.3  | 400.9  | 362.9  | 349.2  | 394.7  | 398.2  | 394.6  | 466.5  | 0.180883127 | 379.325 | 413.5    | 34.175 | 0.917351874 | 0.1697   | 1.089  |
| 102162_at   | 333.7  | 200.9  | 291.6  | 294.2  | 200.4  | 309.8  | 265.4  | 291.7  | 0.731788601 | 280.1   | 266.825  | 13.275 | 1.04975171  | 0.7684   | -1.046 |
| 102163_at   | 203.3  | 114.9  | 186.9  | 191.1  | 136.1  | 152.5  | 157.5  | 143.8  | 0.278698296 | 174.05  | 147.475  | 26.575 | 1.180200034 | 0.3306   | -1.154 |
| 102164_at   | 3.3    | 2.5    | 2      | 3.3    | 2.5    | 4.3    | 2.3    | 3.3    | 0.582392359 | 2.775   | 3.1      | 0.325  | 0.89516129  | 0.6134   | 1.105  |
| 102165_at   | 284.7  | 236    | 277.5  | 274.9  | 278.7  | 467.8  | 289.1  | 256.6  | 0.346186745 | 268.275 | 323.05   | 54.775 | 0.830444204 | 0.3067   | 1.172  |
| 102166_g_at | 84     | 44.5   | 35.5   | 26.5   | 52.9   | 81.3   | 61.7   | 50     | 0.386125859 | 47.625  | 61.475   | 13.85  | 0.774705165 | 0.2618   | 1.394  |
| 102167_at   | 110.6  | 74     | 49.8   | 88.2   | 62.5   | 140.8  | 88.6   | 89.1   | 0.510084342 | 80.65   | 95.25    | 14.6   | 0.84671916  | 0.5129   | 1.179  |
| 102168_at   | 53.2   | 14.5   | 10.7   | 27     | 8.9    | 71.9   | 33.7   | 38.9   | 0.487245811 | 26.35   | 38.35    | 12     | 0.687092568 | 0.5776   | 1.395  |
| 102169_at   | 92.7   | 63.3   | 75.1   | 110.1  | 66.3   | 138.7  | 92.5   | 97.6   | 0.489088256 | 85.3    | 98.775   | 13.475 | 0.863578841 | 0.5129   | 1.144  |
| 102170_at   | 220.9  | 182.1  | 106.2  | 148.4  | 159.5  | 196.3  | 167.8  | 172.6  | 0.727772271 | 164.4   | 174.05   | 9.65   | 0.944556162 | 0.6016   | 1.094  |
| 102171_r_at | 204.9  | 186    | 181.5  | 211.5  | 149.7  | 293.9  | 184.7  | 231.8  | 0.590223413 | 195.975 | 215.025  | 19.05  | 0.911405651 | 0.6887   | 1.065  |
| 102192_r_at | 9.1    | 8.8    | 5.3    | 7.9    | 7.9    | 8.4    | 7.1    | 7.9    | 0.95885867  | 7.775   | 7.825    | 0.05   | 0.993610224 | 0.831    | 1.029  |
| 102193_at   | 596.3  | 548.2  | 581    | 538.3  | 618.6  | 563.6  | 527.9  | 585.9  | 0.744143979 | 565.95  | 574      | 8.05   | 0.98597561  | 0.7565   | 1.013  |
| 102194_at   | 876    | 884.3  | 802.6  | 699.8  | 842.3  | 866.9  | 656.1  | 733.6  | 0.552600684 | 815.675 | 774.725  | 40.95  | 1.052857466 | 0.5502   | -1.055 |
| 102195_at   | 431.8  | 313.1  | 368    | 490.9  | 339.1  | 340.2  | 382.9  | 569.8  | 0.920105822 | 400.95  | 408      | 7.05   | 0.982720588 | 0.9632   | 1.008  |
| 102196_at   | 342.7  | 410.8  | 439.8  | 387.5  | 353.6  | 301.3  | 283.9  | 363.8  | 0.04946327  | 395.2   | 325.65   | 69.55  | 1.213572854 | 0.0514   | -1.215 |
| 102197_at   | 169.2  | 204    | 233.7  | 212.4  | 322.1  | 255.1  | 301.6  | 273.4  | 0.006080015 | 204.825 | 288.05   | 83.225 | 0.711074466 | 0.006847 | 1.41   |
| 102198_at   | 225    | 193    | 161.3  | 146.1  | 174.8  | 255.1  | 142.9  | 172.9  | 0.870622605 | 181.35  | 186.425  | 5.075  | 0.972777256 | 0.909    | 1.019  |
| 102199_at   | 297.2  | 275.8  | 267.1  | 287.5  | 345.6  | 337.4  | 355    | 226.9  | 0.338580902 | 281.9   | 316.225  | 34.325 | 0.89145387  | 0.392    | 1.105  |
| 102200_at   | 133    | 94.4   | 87.6   | 147.8  | 103    | 143.3  | 99.8   | 85.4   | 0.698059127 | 115.7   | 107.875  | 7.825  | 1.072537659 | 0.7151   | -1.066 |
| 102201_s_at | 1196.6 | 1018   | 1539.7 | 1144.5 | 1183.5 | 1206.4 | 1033   | 1078.2 | 0.45246462  | 1224.7  | 1125.275 | 99.425 | 1.08835618  | 0.4586   | -1.078 |
| 102202_s_at | 375.4  | 383.2  | 258.9  | 298    | 352    | 385.2  | 323.6  | 325.1  | 0.625339061 | 328.875 | 346.475  | 17.6   | 0.949202684 | 0.5648   | 1.065  |
| 102203_at   | 10.4   | 11.1   | 8.2    | 7.5    | 7.5    | 13.8   | 22.2   | 8.8    | 0.344126244 | 9.3     | 13.075   | 3.775  | 0.711281071 | 0.3529   | 1.302  |
| 102204_at   | 29.8   | 16.8   | 47.1   | 79.3   | 33.4   | 33.9   | 34.1   | 41.3   | 0.616404665 | 43.25   | 35.675   | 7.575  | 1.212333567 | 0.9083   | -1.041 |
| 102205_at   | 45.9   | 52.5   | 32     | 79.6   | 60.5   | 35.2   | 65.9   | 84.4   | 0.550792057 | 52.5    | 61.5     | 9      | 0.853658537 | 0.5567   | 1.178  |
| 102206_at   | 160.1  | 143.6  | 119.5  | 112.9  | 129.4  | 134.2  | 155.5  | 113.3  | 0.949414884 | 134.025 | 133.1    | 0.925  | 1.006949662 | 0.9735   | 1.004  |
| 102207_at   | 557.1  | 522.7  | 709.4  | 928.9  | 672.2  | 557    | 692.6  | 847.6  | 0.911697778 | 679.525 | 692.35   | 12.825 | 0.981476132 | 0.8354   | 1.035  |
| 102208_at   | 238.4  | 248.6  | 254.9  | 199.8  | 206.5  | 310.3  | 278.9  | 245.8  | 0.375024923 | 235.425 | 260.375  | 24.95  | 0.904176668 | 0.4001   | 1.098  |
| 102209_at   | 47.6   | 14     | 64.4   | 67.9   | 15.5   | 30     | 44.4   | 64.7   | 0.566559056 | 48.475  | 38.65    | 9.825  | 1.254204398 | 0.6989   | -1.214 |



|             |        |        |        |        |        |        |        |        |             |         |          |         |             |         |        |
|-------------|--------|--------|--------|--------|--------|--------|--------|--------|-------------|---------|----------|---------|-------------|---------|--------|
| 102210_at   | 353.5  | 309.6  | 306.8  | 368.2  | 309.6  | 340    | 279.2  | 306.2  | 0.24447555  | 334.525 | 308.75   | 25.775  | 1.083481781 | 0.2427  | -1.083 |
| 102211_r_at | 20.7   | 30.5   | 31.1   | 46.9   | 36.6   | 28.3   | 37.6   | 46.5   | 0.483470819 | 32.3    | 37.25    | 4.95    | 0.867114094 | 0.4234  | 1.183  |
| 102212_at   | 11.6   | 11.3   | 9.5    | 9.2    | 23.3   | 13.4   | 10.4   | 9.2    | 0.33623031  | 10.4    | 14.075   | 3.675   | 0.738898757 | 0.307   | 1.27   |
| 102213_at   | 53.9   | 78.4   | 66.3   | 61.5   | 72.6   | 108.7  | 61.8   | 58.5   | 0.454828534 | 65.025  | 75.4     | 10.375  | 0.862400531 | 0.4637  | 1.134  |
| 102214_at   | 57.7   | 112.5  | 32.5   | 83.9   | 91.4   | 105.7  | 61.6   | 31     | 0.975170459 | 71.65   | 72.425   | 0.775   | 0.989299275 | 0.9788  | 1.011  |
| 102215_at   | 804.4  | 728.5  | 730.6  | 706.1  | 766.4  | 1007.7 | 768.3  | 711    | 0.370646419 | 742.4   | 813.35   | 70.95   | 0.912768181 | 0.3473  | 1.087  |
| 102216_at   | 64.7   | 61.6   | 47.5   | 51.6   | 42.3   | 56.5   | 36.2   | 41.6   | 0.086098512 | 56.35   | 44.15    | 12.2    | 1.276330691 | 0.07951 | -1.284 |
| 102217_at   | 354.5  | 397    | 414.4  | 493.5  | 402.6  | 370.3  | 391.9  | 463.4  | 0.833195699 | 414.85  | 407.05   | 7.8     | 1.019162265 | 0.8608  | 1.015  |
| 102218_at   | 3.2    | 2.5    | 2.5    | 6      | 5.5    | 15.7   | 7.5    | 3.7    | 0.184839251 | 3.55    | 8.1      | 4.55    | 0.438271605 | 0.08601 | 2.128  |
| 102219_at   | 41.9   | 73.8   | 116.8  | 84.5   | 16.4   | 73.5   | 76.1   | 59.1   | 0.310384499 | 79.25   | 56.275   | 22.975  | 1.408262994 | 0.3459  | -1.54  |
| 102220_at   | 71.1   | 267.6  | 229.9  | 282.9  | 335.2  | 254.4  | 195.9  | 233.5  | 0.494264079 | 212.875 | 254.75   | 41.875  | 0.83562316  | 0.4373  | 1.332  |
| 102221_at   | 843.6  | 771.9  | 498.7  | 644.1  | 660.7  | 881.7  | 767.9  | 618    | 0.674652906 | 689.575 | 732.075  | 42.5    | 0.941945839 | 0.6375  | 1.072  |
| 102222_at   | 587.7  | 539.2  | 545.6  | 749.7  | 561.8  | 655.4  | 817    | 794.4  | 0.241041216 | 605.55  | 707.15   | 101.6   | 0.856324684 | 0.2375  | 1.165  |
| 102223_at   | 284.3  | 251.8  | 287.2  | 248.4  | 234.1  | 328.1  | 262.4  | 310.1  | 0.543707749 | 267.925 | 283.675  | 15.75   | 0.944478717 | 0.5816  | 1.052  |
| 102224_at   | 666.4  | 843.5  | 903.6  | 1060.8 | 668.5  | 616.5  | 846.3  | 884.3  | 0.31696     | 868.575 | 753.9    | 114.675 | 1.152109033 | 0.3271  | -1.15  |
| 102225_at   | 137    | 206.2  | 222.3  | 247.7  | 264.6  | 278.9  | 281    | 268.4  | 0.057967783 | 203.3   | 273.225  | 69.925  | 0.744075396 | 0.04994 | 1.375  |
| 102226_at   | 24.6   | 19.7   | 20.9   | 17.6   | 27.9   | 26     | 52.7   | 26.8   | 0.143631679 | 20.7    | 33.35    | 12.65   | 0.620689655 | 0.05377 | 1.549  |
| 102227_g_at | 2.4    | 20.6   | 10.9   | 3.7    | 15.2   | 28.7   | 3.6    | 7.6    | 0.552559841 | 9.4     | 13.775   | 4.375   | 0.682395644 | 0.5221  | 1.573  |
| 102228_at   | 229.6  | 243.2  | 193.2  | 251    | 185    | 308.1  | 209.5  | 264.6  | 0.700598037 | 229.25  | 241.8    | 12.55   | 0.948097601 | 0.7745  | 1.039  |
| 102229_at   | 377.2  | 366.1  | 418.8  | 482.9  | 345.7  | 352.4  | 316.3  | 336.9  | 0.064239431 | 411.25  | 337.825  | 73.425  | 1.217346259 | 0.02864 | -1.211 |
| 102230_at   | 125.2  | 52     | 70.9   | 87.5   | 63.5   | 98.4   | 56.8   | 82.4   | 0.655612809 | 83.9    | 75.275   | 8.625   | 1.114579874 | 0.7304  | -1.084 |
| 102231_at   | 743.9  | 799.5  | 1033.5 | 869.4  | 668.8  | 883.2  | 862.8  | 890.8  | 0.683652604 | 861.575 | 826.4    | 35.175  | 1.042564134 | 0.6938  | -1.042 |
| 102232_at   | 415.9  | 391.2  | 388.2  | 355.5  | 414    | 401.7  | 597.9  | 401    | 0.267063243 | 387.7   | 453.65   | 65.95   | 0.854623609 | 0.2109  | 1.154  |
| 102233_at   | 131.5  | 189    | 154.3  | 198    | 292.2  | 235.5  | 161.4  | 207.8  | 0.137610743 | 168.2   | 224.225  | 56.025  | 0.750139369 | 0.1249  | 1.32   |
| 102234_at   | 206.4  | 173.7  | 194.8  | 311.6  | 147.3  | 226.6  | 292.8  | 265    | 0.8062995   | 221.625 | 232.925  | 11.3    | 0.95148653  | 0.8336  | 1.044  |
| 102235_at   | 301.5  | 329.5  | 237.3  | 407.1  | 301.1  | 427.9  | 377.7  | 559.3  | 0.189879261 | 318.85  | 416.5    | 97.65   | 0.765546218 | 0.1779  | 1.298  |
| 102237_at   | 56.3   | 31.9   | 22.4   | 43.2   | 34.8   | 46.2   | 43.7   | 42.9   | 0.67993883  | 38.45   | 41.9     | 3.45    | 0.917661098 | 0.5327  | 1.148  |
| 102238_at   | 32.6   | 29.3   | 38.3   | 26.1   | 48.1   | 112.9  | 26.2   | 53.2   | 0.22178592  | 31.575  | 60.1     | 28.525  | 0.525374376 | 0.146   | 1.678  |
| 102239_at   | 41.1   | 36.7   | 87.2   | 45     | 46.1   | 40.3   | 27.8   | 63.5   | 0.584655414 | 52.5    | 44.425   | 8.075   | 1.181767023 | 0.5888  | -1.159 |
| 102240_at   | 21.7   | 19.1   | 8.6    | 10.4   | 10.2   | 35     | 19     | 10.9   | 0.588868155 | 14.95   | 18.775   | 3.825   | 0.796271638 | 0.6505  | 1.191  |
| 102241_f_at | 455.3  | 494.8  | 329    | 387.7  | 394.3  | 526.1  | 370.1  | 368.7  | 0.972296005 | 416.7   | 414.8    | 1.9     | 1.004580521 | 0.9771  | 1.004  |
| 102242_at   | 293.6  | 213.3  | 255.6  | 247.6  | 213.9  | 367    | 209.1  | 385.9  | 0.461666525 | 252.525 | 293.975  | 41.45   | 0.859001616 | 0.5373  | 1.124  |
| 102243_at   | 9      | 13.8   | 6.6    | 5.6    | 7.9    | 13.1   | 15.3   | 10     | 0.294055559 | 8.75    | 11.575   | 2.825   | 0.755939525 | 0.2569  | 1.364  |
| 102244_at   | 88.8   | 51.3   | 44.7   | 95.4   | 26.3   | 111.7  | 12.1   | 121.3  | 0.946844665 | 70.05   | 67.85    | 2.2     | 1.032424466 | 0.5501  | -1.459 |
| 102247_at   | 108.1  | 62.9   | 85.5   | 102.1  | 50.4   | 109.2  | 132.4  | 79.1   | 0.885193345 | 89.65   | 92.775   | 3.125   | 0.966316357 | 0.9776  | 1.007  |
| 102248_f_at | 586.7  | 542.2  | 604.1  | 715.9  | 574.6  | 512.2  | 661.5  | 700.2  | 0.998640034 | 612.225 | 612.125  | 0.1     | 1.000163365 | 0.981   | 1.002  |
| 102249_at   | 24.4   | 75.8   | 18.6   | 26.6   | 89.2   | 46.8   | 36.3   | 58     | 0.271891825 | 36.35   | 57.575   | 21.225  | 0.631350413 | 0.1696  | 1.761  |
| 102250_at   | 465.9  | 482.1  | 403.1  | 441.9  | 328.6  | 502.4  | 489.4  | 475.1  | 0.989331793 | 448.25  | 448.875  | 0.625   | 0.99860763  | 0.9263  | -1.01  |
| 102251_at   | 135    | 55.7   | 74.6   | 119    | 83.9   | 172.8  | 109.7  | 64.6   | 0.711280938 | 96.075  | 107.75   | 11.675  | 0.891647332 | 0.7271  | 1.114  |
| 102252_at   | 1132.4 | 1149.1 | 1222.1 | 1151   | 1106.7 | 903.2  | 1165.7 | 1160   | 0.292490251 | 1163.65 | 1083.9   | 79.75   | 1.073576898 | 0.2708  | -1.079 |
| 102253_at   | 12     | 12.9   | 7.7    | 8      | 8.3    | 16.1   | 10.8   | 9.7    | 0.638673024 | 10.15   | 11.225   | 1.075   | 0.904231626 | 0.6361  | 1.102  |
| 102254_f_at | 10.9   | 11.8   | 6.5    | 7.3    | 5.2    | 11.6   | 9.5    | 6.7    | 0.667431754 | 9.125   | 8.25     | 0.875   | 1.106060606 | 0.619   | -1.13  |
| 102255_at   | 113.3  | 108.9  | 72.9   | 77.8   | 91.3   | 91.6   | 135.4  | 114.2  | 0.353619496 | 93.225  | 108.125  | 14.9    | 0.862196532 | 0.3405  | 1.166  |
| 102256_at   | 3.3    | 5.4    | 2.2    | 3.3    | 4.3    | 4      | 2.4    | 3.2    | 0.928310258 | 3.55    | 3.475    | 0.075   | 1.021582734 | 0.9657  | 1.01   |
| 102257_at   | 575.9  | 437.3  | 328.8  | 550.9  | 242    | 464.1  | 580.4  | 424.9  | 0.633997134 | 473.225 | 427.85   | 45.375  | 1.106053523 | 0.6008  | -1.133 |
| 102258_at   | 231.8  | 163.4  | 209.9  | 238.3  | 53.1   | 15.1   | 110.9  | 115.7  | 0.004658123 | 210.85  | 73.7     | 137.15  | 2.860922659 | 0.03559 | -3.682 |
| 102259_at   | 114.8  | 56.1   | 189    | 173.4  | 49.1   | 89.5   | 220.6  | 148.1  | 0.896974888 | 133.325 | 126.825  | 6.5     | 1.051251725 | 0.8295  | -1.101 |
| 102260_at   | 31.6   | 44.3   | 36.4   | 54.3   | 22.1   | 66.4   | 33.1   | 15.1   | 0.578328828 | 41.65   | 34.175   | 7.475   | 1.21872714  | 0.3632  | -1.395 |
| 102261_f_at | 380.9  | 399.1  | 356.5  | 419.9  | 273.3  | 352.6  | 290.9  | 341    | 0.021984048 | 389.1   | 314.45   | 74.65   | 1.237398633 | 0.02196 | -1.242 |
| 102262_r_at | 167    | 159.2  | 180.4  | 198.5  | 162.6  | 153.6  | 137.1  | 159.1  | 0.072270772 | 176.275 | 153.1    | 23.175  | 1.151371653 | 0.06289 | -1.15  |
| 102263_at   | 261.9  | 226.4  | 195    | 154.9  | 146    | 216.2  | 198.4  | 140.6  | 0.292203508 | 209.55  | 175.3    | 34.25   | 1.19537935  | 0.2971  | -1.194 |
| 102264_at   | 55.6   | 33.6   | 42.7   | 70.3   | 59.5   | 59.4   | 48.2   | 53.5   | 0.616599642 | 50.55   | 55.15    | 4.6     | 0.916591115 | 0.4947  | 1.129  |
| 102265_at   | 95.4   | 47.6   | 40.3   | 15.2   | 49.3   | 72.1   | 66.6   | 42.7   | 0.680307097 | 49.625  | 57.675   | 8.05    | 0.860424794 | 0.449   | 1.381  |
| 102266_at   | 9300.7 | 8705.7 | 7307.3 | 6900.3 | 8348.4 | 7359.4 | 9077.9 | 7852.4 | 0.881326466 | 8053.5  | 8159.525 | 106.025 | 0.987005984 | 0.8407  | 1.018  |
| 102267_at   | 41     | 116.5  | 60.2   | 70.8   | 56.6   | 71.7   | 59     | 49.3   | 0.486043874 | 72.125  | 59.15    | 12.975  | 1.219357566 | 0.5741  | -1.146 |
| 102268_at   | 499.8  | 465.4  | 567    | 736.1  | 557.4  | 479.9  | 484.2  | 472.1  | 0.344757555 | 567.075 | 498.4    | 68.675  | 1.137790931 | 0.3255  | -1.122 |



|             |        |        |        |        |        |        |        |        |             |          |         |         |             |         |        |
|-------------|--------|--------|--------|--------|--------|--------|--------|--------|-------------|----------|---------|---------|-------------|---------|--------|
| 102269_at   | 10.4   | 13.9   | 8.8    | 10.3   | 9.8    | 10.9   | 8.9    | 10.9   | 0.572190176 | 10.85    | 10.125  | 0.725   | 1.071604938 | 0.6135  | -1.059 |
| 102271_at   | 453.9  | 420.5  | 370.1  | 452.6  | 500.4  | 455.2  | 441.6  | 488    | 0.103106521 | 424.275  | 471.3   | 47.025  | 0.900222788 | 0.1042  | 1.113  |
| 102272_at   | 20.1   | 25.7   | 38     | 46.6   | 55.9   | 49.4   | 25.8   | 44.3   | 0.249000605 | 32.6     | 43.85   | 11.25   | 0.743443558 | 0.2711  | 1.362  |
| 102273_at   | 245.6  | 193.3  | 262.2  | 319.9  | 202.4  | 299.3  | 361.3  | 285.2  | 0.477233458 | 255.25   | 287.05  | 31.8    | 0.889217906 | 0.5071  | 1.119  |
| 102274_at   | 101    | 34.7   | 85.6   | 86.7   | 83.8   | 124.7  | 61.3   | 111.2  | 0.403018646 | 77       | 95.25   | 18.25   | 0.80839895  | 0.4192  | 1.287  |
| 102275_at   | 80.2   | 56.4   | 142    | 147.5  | 69.7   | 81.9   | 186.3  | 119.9  | 0.826783559 | 106.525  | 114.45  | 7.925   | 0.930755789 | 0.823   | 1.078  |
| 102277_at   | 527.3  | 327.5  | 489    | 432.9  | 290.5  | 576.1  | 681    | 452.6  | 0.583102033 | 444.175  | 500.05  | 55.875  | 0.888261174 | 0.6995  | 1.09   |
| 102278_at   | 311.2  | 243.4  | 214.1  | 223.5  | 234.6  | 265.6  | 168.3  | 217.4  | 0.408516279 | 248.05   | 221.475 | 26.575  | 1.11999097  | 0.3984  | -1.123 |
| 102279_at   | 535.2  | 563.9  | 402.8  | 385.5  | 496    | 455.2  | 388.2  | 355.4  | 0.422030242 | 471.85   | 423.7   | 48.15   | 1.113641728 | 0.4372  | -1.108 |
| 102280_at   | 84     | 92.3   | 110.3  | 138.8  | 82.9   | 109    | 131.9  | 136.3  | 0.632983158 | 106.35   | 115.025 | 8.675   | 0.924581613 | 0.6387  | 1.082  |
| 102281_at   | 30.4   | 16.6   | 54.4   | 18.4   | 18     | 31.7   | 35.9   | 40     | 0.890023352 | 29.95    | 31.4    | 1.45    | 0.953821656 | 0.7213  | 1.129  |
| 102282_g_at | 116.9  | 64.2   | 69.4   | 65.9   | 53.4   | 98.6   | 78.1   | 62     | 0.719408789 | 79.1     | 73.025  | 6.075   | 1.083190688 | 0.7167  | -1.077 |
| 102283_at   | 208.1  | 248.7  | 299.1  | 646.1  | 302.5  | 215.1  | 370.4  | 381.2  | 0.773059661 | 350.5    | 317.3   | 33.2    | 1.10463284  | 0.9427  | -1.021 |
| 102284_at   | 3.1    | 3.3    | 2.4    | 1.3    | 10.8   | 10.6   | 3.2    | 18.2   | 0.074194828 | 2.525    | 10.7    | 8.175   | 0.235981308 | 0.01989 | 3.839  |
| 102285_at   | 102.1  | 88     | 78.4   | 81     | 84.6   | 100.1  | 107.3  | 86.6   | 0.375695919 | 87.375   | 94.65   | 7.275   | 0.923137876 | 0.3652  | 1.084  |
| 102286_at   | 255.3  | 221.4  | 271.1  | 288    | 218.5  | 311.1  | 313.6  | 357.7  | 0.268279622 | 258.95   | 300.225 | 41.275  | 0.862519777 | 0.2968  | 1.146  |
| 102287_at   | 27.2   | 37.1   | 18.2   | 24.7   | 30.1   | 47.7   | 24.3   | 27.1   | 0.436969872 | 26.8     | 32.3    | 5.5     | 0.829721362 | 0.4118  | 1.202  |
| 102288_at   | 60.2   | 53.9   | 27.3   | 11.2   | 50.7   | 15     | 33.9   | 8.7    | 0.486475635 | 38.15    | 27.075  | 11.075  | 1.409048938 | 0.5281  | -1.45  |
| 102289_r_at | 0.5    | 3.4    | 2.1    | 13.2   | 3.9    | 15.3   | 5.3    | 1.8    | 0.683343775 | 4.8      | 6.575   | 1.775   | 0.730038023 | 0.4683  | 1.883  |
| 102290_at   | 28.1   | 29.2   | 23.9   | 25.3   | 25.6   | 35.5   | 23.4   | 28     | 0.631091752 | 26.625   | 28.125  | 1.5     | 0.946666667 | 0.6725  | 1.046  |
| 102291_at   | 14.4   | 11.3   | 10     | 7      | 8      | 16.4   | 8.6    | 8.8    | 0.931752615 | 10.675   | 10.45   | 0.225   | 1.0215311   | 0.8881  | -1.034 |
| 102292_at   | 281.9  | 327    | 275.9  | 369.8  | 281.9  | 308.3  | 287.5  | 278.8  | 0.351611537 | 313.65   | 289.125 | 24.525  | 1.084824903 | 0.338   | -1.078 |
| 102293_at   | 14.2   | 46.8   | 69.6   | 56.7   | 61.2   | 70     | 54.6   | 63     | 0.28821849  | 46.825   | 62.2    | 15.375  | 0.752813505 | 0.2761  | 1.538  |
| 102294_at   | 89.1   | 92.2   | 39.1   | 47     | 47.6   | 129.7  | 76.3   | 60     | 0.631357197 | 66.85    | 78.4    | 11.55   | 0.852678571 | 0.6281  | 1.17   |
| 102295_at   | 19.9   | 55.5   | 90.6   | 106.7  | 73     | 64.9   | 93.4   | 131.7  | 0.392773253 | 68.175   | 90.75   | 22.575  | 0.751239669 | 0.3397  | 1.528  |
| 102296_at   | 27.3   | 49.3   | 37.8   | 45.2   | 58.4   | 91.3   | 44     | 63.1   | 0.086664787 | 39.9     | 64.2    | 24.3    | 0.621495327 | 0.05789 | 1.593  |
| 102297_at   | 158.4  | 138.4  | 135.4  | 126.2  | 160.9  | 155    | 155.1  | 121.6  | 0.47752242  | 139.6    | 148.15  | 8.55    | 0.942288221 | 0.5051  | 1.058  |
| 102298_at   | 9.1    | 9.2    | 10.5   | 14.8   | 12.3   | 22.8   | 11.5   | 11.3   | 0.30706469  | 10.9     | 14.475  | 3.575   | 0.753022453 | 0.2506  | 1.294  |
| 102299_at   | 73.2   | 66.6   | 78.5   | 99.5   | 67.5   | 14.2   | 82.4   | 115.7  | 0.69392149  | 79.45    | 69.95   | 9.5     | 1.135811294 | 0.4785  | -1.43  |
| 102300_at   | 326    | 225.6  | 263    | 242.4  | 275.3  | 296.7  | 219.3  | 242.2  | 0.840484222 | 264.25   | 258.375 | 5.875   | 1.022738268 | 0.8585  | 1.02   |
| 102301_at   | 20.7   | 16.8   | 10.6   | 8.8    | 18.3   | 22     | 29.4   | 2.8    | 0.563496119 | 14.225   | 18.125  | 3.9     | 0.784827586 | 0.9917  | 1.006  |
| 102302_at   | 621.5  | 759.4  | 819.1  | 872.8  | 998.5  | 963.2  | 788    | 909.9  | 0.085702355 | 768.2    | 914.9   | 146.7   | 0.839654607 | 0.09515 | 1.196  |
| 102303_i_at | 401.2  | 371.8  | 352.8  | 358.1  | 327.6  | 387.4  | 408    | 322.6  | 0.708236103 | 370.975  | 361.4   | 9.575   | 1.026494189 | 0.6621  | 1.031  |
| 102304_f_at | 226    | 217.3  | 215.7  | 246.5  | 250.5  | 230.5  | 292.6  | 293.9  | 0.076556131 | 226.375  | 266.875 | 40.5    | 0.84824356  | 0.05454 | 1.174  |
| 102305_at   | 100.4  | 99.9   | 96.9   | 101.8  | 75     | 187.8  | 134.3  | 118.8  | 0.298367181 | 99.75    | 128.975 | 29.225  | 0.773405699 | 0.3225  | 1.228  |
| 102306_at   | 237.8  | 229.2  | 282.3  | 296.6  | 206.1  | 308.7  | 344.9  | 264.8  | 0.591575646 | 261.475  | 281.125 | 19.65   | 0.930102268 | 0.654   | 1.062  |
| 102307_at   | 36.4   | 29.4   | 31.1   | 40.9   | 26.8   | 60.3   | 62.3   | 41.6   | 0.21315015  | 34.45    | 47.75   | 13.3    | 0.721465969 | 0.2316  | 1.324  |
| 102308_at   | 753.5  | 661    | 876.1  | 843.7  | 664.1  | 769.9  | 737.4  | 758.8  | 0.393380029 | 783.575  | 732.55  | 51.025  | 1.069653949 | 0.4125  | -1.065 |
| 102309_at   | 600.3  | 618.9  | 853    | 908.8  | 722.6  | 649.6  | 1002.3 | 900.9  | 0.539487293 | 745.25   | 818.85  | 73.6    | 0.910117848 | 0.533   | 1.101  |
| 102310_at   | 226    | 199.5  | 188.6  | 198.8  | 151.5  | 234.7  | 184.3  | 137.9  | 0.321678243 | 203.225  | 177.1   | 26.125  | 1.147515528 | 0.2527  | -1.17  |
| 102311_at   | 50.5   | 27.2   | 36.9   | 29.1   | 36.5   | 64.6   | 23.7   | 44.9   | 0.547542999 | 35.925   | 42.425  | 6.5     | 0.84678845  | 0.6189  | 1.141  |
| 102312_r_at | 180.3  | 146    | 174.7  | 163.1  | 125.3  | 210.7  | 169.1  | 130    | 0.75122947  | 166.025  | 158.775 | 7.25    | 1.0456621   | 0.6416  | -1.066 |
| 102313_at   | 118.7  | 59.3   | 103.3  | 85.3   | 80.2   | 83.2   | 102.7  | 89.8   | 0.854990387 | 91.65    | 88.975  | 2.675   | 1.030064625 | 0.9911  | 1.002  |
| 102314_at   | 134.2  | 93.6   | 107.9  | 136.8  | 126.6  | 89     | 100    | 184.5  | 0.784832318 | 118.125  | 125.025 | 6.9     | 0.944811038 | 0.8817  | 1.029  |
| 102315_at   | 1960.5 | 1743.8 | 2084.8 | 1688   | 2336.3 | 1999.3 | 1570.1 | 1670.9 | 0.904770723 | 1869.275 | 1894.15 | 24.875  | 0.98686746  | 0.9658  | 1.005  |
| 102316_at   | 341.1  | 238.3  | 325    | 301.9  | 300    | 389.8  | 347.1  | 283.6  | 0.419782455 | 301.575  | 330.125 | 28.55   | 0.913517607 | 0.4252  | 1.096  |
| 102317_at   | 635.6  | 817.5  | 873.1  | 1049.7 | 917.3  | 876.2  | 991.4  | 919.8  | 0.413365051 | 843.975  | 926.175 | 82.2    | 0.911247874 | 0.352   | 1.114  |
| 102318_at   | 124.2  | 177.7  | 219.5  | 124.6  | 276.6  | 222    | 215.5  | 171    | 0.107827796 | 161.5    | 221.275 | 59.775  | 0.729861033 | 0.102   | 1.392  |
| 102319_at   | 552.8  | 534.2  | 581.3  | 541.5  | 489.6  | 608.2  | 629.3  | 597.8  | 0.435616715 | 552.45   | 581.225 | 28.775  | 0.950492494 | 0.4635  | 1.048  |
| 102320_at   | 526.7  | 550    | 691.7  | 491.8  | 575.6  | 583.2  | 399    | 579.7  | 0.643406632 | 565.05   | 534.375 | 30.675  | 1.057403509 | 0.6345  | -1.061 |
| 102321_at   | 286.3  | 195.4  | 305.4  | 332.1  | 235.2  | 314.3  | 335.1  | 364.6  | 0.453860328 | 279.8    | 312.3   | 32.5    | 0.895933397 | 0.4711  | 1.123  |
| 102322_at   | 2759.6 | 2636.4 | 2660.7 | 2503.8 | 2882   | 2458.2 | 2835.3 | 3073.3 | 0.284092547 | 2640.125 | 2812.2  | 172.075 | 0.938811251 | 0.2821  | 1.062  |
| 102323_at   | 522.5  | 523.3  | 588.7  | 684.1  | 490.1  | 610.1  | 572.9  | 483.2  | 0.442959234 | 579.65   | 539.075 | 40.575  | 1.07526782  | 0.4386  | -1.074 |
| 102324_at   | 337.2  | 343.4  | 252.3  | 230.3  | 303.7  | 339.5  | 275.2  | 310.7  | 0.63078944  | 290.8    | 307.275 | 16.475  | 0.946383533 | 0.561   | 1.07   |
| 102326_at   | 91.2   | 93.5   | 78.6   | 76.3   | 108.1  | 131.4  | 51.4   | 65.5   | 0.838361422 | 84.9     | 89.1    | 4.2     | 0.952861953 | 0.9425  | -1.017 |
| 102327_at   | 109.7  | 149.6  | 203.4  | 300.2  | 151.7  | 150.7  | 235.8  | 188.9  | 0.854064761 | 190.725  | 181.775 | 8.95    | 1.049236694 | 0.9867  | 1.004  |



|             |        |        |        |        |        |        |        |        |             |          |          |         |             |          |        |
|-------------|--------|--------|--------|--------|--------|--------|--------|--------|-------------|----------|----------|---------|-------------|----------|--------|
| 102328_at   | 171.4  | 150    | 191.1  | 225.3  | 142    | 148.1  | 178.2  | 192.9  | 0.379543605 | 184.45   | 165.3    | 19.15   | 1.11584997  | 0.3828   | -1.112 |
| 102329_at   | 21.3   | 40.7   | 21.8   | 18.9   | 62.6   | 24.4   | 32.3   | 19.4   | 0.451006007 | 25.675   | 34.675   | 9       | 0.740447008 | 0.4522   | 1.279  |
| 102330_at   | 14.7   | 74.7   | 11.1   | 22.5   | 39     | 39     | 29.5   | 31     | 0.812702379 | 30.75    | 34.625   | 3.875   | 0.888086643 | 0.3793   | 1.499  |
| 102331_at   | 955.1  | 760.8  | 1016.2 | 909.9  | 825.3  | 825.3  | 826.6  | 830.7  | 0.22255715  | 910.5    | 826.975  | 83.525  | 1.101000635 | 0.1963   | -1.095 |
| 102332_at   | 245.2  | 236.3  | 344.6  | 358.1  | 230.7  | 312    | 259.2  | 287.8  | 0.549146819 | 296.05   | 272.425  | 23.625  | 1.086721116 | 0.5949   | -1.074 |
| 102333_at   | 1040.8 | 884.9  | 847.9  | 974.4  | 690.7  | 947.3  | 767.4  | 864.4  | 0.146088822 | 937      | 817.45   | 119.55  | 1.146247477 | 0.1419   | -1.151 |
| 102334_at   | 159.3  | 117.9  | 129.3  | 121.7  | 124.7  | 152    | 134.3  | 119    | 0.971009195 | 132.05   | 132.5    | 0.45    | 0.996603774 | 0.9464   | 1.006  |
| 102335_at   | 431    | 576.5  | 575.1  | 473.5  | 561.5  | 746.3  | 586    | 587.5  | 0.107890635 | 514.025  | 620.325  | 106.3   | 0.828638214 | 0.09956  | 1.208  |
| 102336_at   | 528.2  | 556    | 469.1  | 800.7  | 627.4  | 566.6  | 634.1  | 865.5  | 0.421267485 | 588.5    | 673.4    | 84.9    | 0.873923374 | 0.3703   | 1.153  |
| 102337_s_at | 27.3   | 47     | 5.6    | 9.2    | 52.3   | 24.3   | 43.4   | 29.3   | 0.244037818 | 22.275   | 37.325   | 15.05   | 0.596784997 | 0.1741   | 2.218  |
| 102338_at   | 128.9  | 136.6  | 106.7  | 115.4  | 112.6  | 139.6  | 111.6  | 102.9  | 0.633541177 | 121.9    | 116.675  | 5.225   | 1.044782516 | 0.6092   | -1.047 |
| 102340_at   | 146.2  | 137.7  | 117.2  | 186.6  | 179.7  | 163.4  | 188.4  | 150.3  | 0.223468443 | 146.925  | 170.45   | 23.525  | 0.861982986 | 0.1944   | 1.172  |
| 102341_at   | 30.2   | 32.6   | 6.3    | 14.5   | 2.3    | 9.9    | 6.9    | 18.3   | 0.172483551 | 20.9     | 9.35     | 11.55   | 2.235294118 | 0.1867   | -2.365 |
| 102342_at   | 236.1  | 242.2  | 263.3  | 347    | 236.4  | 258.4  | 271.4  | 323.1  | 0.995771235 | 272.15   | 272.325  | 0.175   | 0.999357385 | 0.9561   | 1.006  |
| 102343_at   | 1360.3 | 1400.1 | 1247.9 | 1130.5 | 1595.3 | 1299.3 | 1320.1 | 1329.4 | 0.316936524 | 1284.7   | 1386.025 | 101.325 | 0.926895258 | 0.3094   | 1.079  |
| 102344_s_at | 90     | 104.9  | 114.4  | 126.8  | 208.3  | 180.5  | 196.1  | 206.4  | 0.000143199 | 109.025  | 197.825  | 88.8    | 0.551118413 | 0.000278 | 1.826  |
| 102345_at   | 171.7  | 199.7  | 173.9  | 182    | 168.4  | 218.4  | 213.2  | 195.4  | 0.24871011  | 181.825  | 198.85   | 17.025  | 0.914382701 | 0.2523   | 1.09   |
| 102346_at   | 498.4  | 360.7  | 590.7  | 486.7  | 623.5  | 427.9  | 515.6  | 530.9  | 0.539593564 | 484.125  | 524.475  | 40.35   | 0.923065923 | 0.5259   | 1.09   |
| 102348_at   | 241.5  | 509.1  | 311.6  | 541.7  | 1144.8 | 372.1  | 642    | 732.9  | 0.138080463 | 400.975  | 722.95   | 321.975 | 0.55463725  | 0.1102   | 1.763  |
| 102349_at   | 347.3  | 298.8  | 275.3  | 377.5  | 216.7  | 227.1  | 308.1  | 284.6  | 0.08627976  | 324.725  | 259.125  | 65.6    | 1.253159672 | 0.08559  | -1.257 |
| 102350_at   | 332.5  | 355.9  | 360.9  | 354.1  | 367.9  | 355    | 297.4  | 365.6  | 0.817888567 | 350.85   | 346.475  | 4.375   | 1.012627174 | 0.7776   | 1.016  |
| 102351_at   | 93.8   | 189.9  | 150.3  | 93.9   | 49.4   | 84.5   | 123.4  | 102.2  | 0.193102724 | 131.975  | 89.875   | 42.1    | 1.468428373 | 0.1904   | -1.478 |
| 102352_at   | 160.3  | 154.1  | 203.8  | 195.6  | 145.9  | 142.9  | 126.8  | 185.8  | 0.162831013 | 178.45   | 150.35   | 28.1    | 1.18689724  | 0.1529   | -1.19  |
| 102353_at   | 50.6   | 60.7   | 36.3   | 20.2   | 50     | 42.5   | 35.3   | 46.6   | 0.869160797 | 41.95    | 43.6     | 1.65    | 0.962155963 | 0.6828   | 1.115  |
| 102354_at   | 1153.2 | 1210.4 | 855.2  | 818    | 883.3  | 1039.4 | 735.9  | 823.2  | 0.29617326  | 1009.2   | 870.45   | 138.75  | 1.15940031  | 0.2992   | -1.151 |
| 102356_at   | 328.9  | 307.3  | 251.3  | 254.7  | 343.5  | 361.8  | 262.9  | 252.1  | 0.587585321 | 285.55   | 305.075  | 19.525  | 0.935999344 | 0.6148   | 1.062  |
| 102357_at   | 260.8  | 343.2  | 376.4  | 361.5  | 314.5  | 328.9  | 343    | 319.6  | 0.755403453 | 335.475  | 326.5    | 8.975   | 1.027488515 | 0.8405   | -1.018 |
| 102360_at   | 175.9  | 316.6  | 347.1  | 458.6  | 344.4  | 230.1  | 314.1  | 423    | 0.963857352 | 324.55   | 327.9    | 3.35    | 0.989783471 | 0.8628   | 1.044  |
| 102362_i_at | 15.2   | 13.6   | 11.8   | 27.9   | 11.1   | 18     | 10.7   | 10     | 0.312290042 | 17.125   | 12.45    | 4.675   | 1.375502008 | 0.2596   | -1.337 |
| 102363_r_at | 105.4  | 110.4  | 98.5   | 204.9  | 111.9  | 160.2  | 146.8  | 99.1   | 0.992155224 | 129.8    | 129.5    | 0.3     | 1.002316602 | 0.9012   | 1.027  |
| 102364_at   | 8442.8 | 9246.1 | 7026.3 | 8015.3 | 6924.9 | 6758.3 | 8076   | 8617.2 | 0.396600519 | 8182.625 | 7594.1   | 588.525 | 1.077497663 | 0.397    | -1.078 |
| 102366_at   | 12.4   | 12.5   | 6.3    | 12.4   | 7.9    | 11.7   | 7.7    | 8.6    | 0.332559637 | 10.9     | 8.975    | 1.925   | 1.21448468  | 0.4219   | -1.183 |
| 102368_at   | 765.9  | 638.3  | 647.2  | 582.5  | 691    | 656.6  | 589.9  | 599    | 0.614899687 | 658.475  | 634.125  | 24.35   | 1.038399369 | 0.6276   | -1.036 |
| 102370_at   | 1328.2 | 1459.3 | 1372.8 | 1140.3 | 1704.8 | 1414.8 | 1209.1 | 1314.9 | 0.526280036 | 1325.15  | 1410.9   | 85.75   | 0.939223191 | 0.5399   | 1.06   |
| 102371_at   | 390.2  | 320.5  | 318.1  | 504.3  | 297.9  | 189.6  | 309.9  | 326.6  | 0.110076129 | 383.275  | 281      | 102.275 | 1.363967972 | 0.1071   | -1.369 |
| 102372_at   | 58.4   | 54.3   | 39.4   | 54.1   | 39.6   | 82.6   | 40.3   | 68.3   | 0.620177251 | 51.55    | 57.7     | 6.15    | 0.893414211 | 0.7399   | 1.074  |
| 102373_at   | 1557.7 | 1578.5 | 1150.6 | 1373.2 | 1113.3 | 1213.8 | 1315.1 | 815.1  | 0.086715764 | 1415     | 1114.325 | 300.675 | 1.269827025 | 0.102    | -1.28  |
| 102374_at   | 275.2  | 247.1  | 343.2  | 406.5  | 285.2  | 178.6  | 255    | 384.4  | 0.477393536 | 318      | 275.8    | 42.2    | 1.153009427 | 0.4392   | -1.174 |
| 102375_at   | 362    | 316.1  | 321.8  | 350.7  | 261.4  | 290.7  | 287.7  | 361.9  | 0.191356667 | 337.65   | 300.425  | 37.225  | 1.123907797 | 0.1591   | -1.13  |
| 102376_r_at | 304.1  | 85.3   | 215.4  | 254.2  | 238.2  | 111.1  | 297    | 74.7   | 0.640975423 | 214.75   | 180.25   | 34.5    | 1.191400832 | 0.6253   | -1.247 |
| 102378_at   | 706.5  | 673.3  | 665.5  | 665.2  | 593.5  | 502.5  | 707.2  | 641    | 0.220301763 | 677.625  | 611.05   | 66.575  | 1.108951804 | 0.1825   | -1.117 |
| 102379_at   | 336.5  | 323.3  | 308.9  | 288.7  | 313.2  | 324.7  | 261.9  | 295.3  | 0.400278873 | 314.35   | 298.775  | 15.575  | 1.052129529 | 0.3962   | -1.054 |
| 102380_s_at | 289.9  | 352.5  | 222    | 351.9  | 338.4  | 333.6  | 196.2  | 389.8  | 0.847589673 | 304.075  | 314.5    | 10.425  | 0.966852146 | 0.9197   | 1.02   |
| 102381_at   | 521.8  | 597.9  | 807.6  | 836.2  | 871.3  | 608.9  | 929.7  | 860.6  | 0.273967418 | 690.875  | 817.625  | 126.75  | 0.844977832 | 0.2859   | 1.191  |
| 102382_at   | 360.5  | 293.5  | 320.8  | 341    | 240.1  | 244.6  | 248.9  | 266.7  | 0.007149877 | 328.95   | 250.075  | 78.875  | 1.315405378 | 0.001557 | -1.313 |
| 102383_at   | 367.6  | 371.5  | 401.3  | 441.3  | 294.5  | 348.4  | 365    | 418.7  | 0.260494571 | 395.425  | 356.65   | 38.775  | 1.108720034 | 0.2452   | -1.114 |
| 102384_at   | 820.1  | 924.2  | 1016.7 | 1261.3 | 1155.7 | 1027.3 | 1070.9 | 1101.6 | 0.449762578 | 1005.575 | 1088.875 | 83.3    | 0.923499024 | 0.3705   | 1.096  |
| 102385_at   | 792.8  | 678.2  | 849.9  | 714.6  | 830.8  | 941.6  | 729.9  | 870.9  | 0.201253748 | 758.875  | 843.3    | 84.425  | 0.899887347 | 0.2037   | 1.111  |
| 102387_at   | 1762.3 | 1506   | 1688.8 | 1668.4 | 1610.4 | 1655.7 | 1728.7 | 1726.2 | 0.714014795 | 1656.375 | 1680.25  | 23.875  | 0.985790805 | 0.6938   | 1.016  |
| 102389_s_at | 66.5   | 86.3   | 70.7   | 85.4   | 72.1   | 88.6   | 90.1   | 91.7   | 0.263611029 | 77.225   | 85.625   | 8.4     | 0.90189781  | 0.2706   | 1.111  |
| 102393_at   | 38.8   | 55.5   | 75.2   | 29     | 84.2   | 44.7   | 31.8   | 35     | 0.966056091 | 49.625   | 48.925   | 0.7     | 1.014307614 | 0.9274   | 1.029  |
| 102395_at   | 2833.9 | 3004.5 | 2609   | 2112.6 | 3089.6 | 3065.7 | 2664.3 | 2703.5 | 0.334158448 | 2640     | 2880.775 | 240.775 | 0.916420061 | 0.3219   | 1.098  |
| 102396_at   | 595.9  | 446.9  | 404.1  | 415.1  | 472    | 488.8  | 503.2  | 482.2  | 0.669811892 | 465.5    | 486.55   | 21.05   | 0.956736204 | 0.5539   | 1.058  |
| 102397_at   | 193.2  | 148    | 254.4  | 370.6  | 154.4  | 136.2  | 191.5  | 173.5  | 0.206170344 | 241.55   | 163.9    | 77.65   | 1.473764491 | 0.1584   | -1.401 |
| 102398_at   | 1112   | 1210.5 | 1071.6 | 1173.1 | 1255.7 | 1175.1 | 1048   | 1046.5 | 0.868101913 | 1141.8   | 1131.325 | 10.475  | 1.009259055 | 0.8382   | 1.011  |
| 102399_at   | 314.9  | 421.2  | 644.4  | 616.8  | 491.6  | 566.4  | 534.6  | 521.1  | 0.74023572  | 499.325  | 528.425  | 29.1    | 0.94493069  | 0.595    | 1.101  |



|             |        |        |        |        |        |        |        |        |             |          |          |         |             |         |        |
|-------------|--------|--------|--------|--------|--------|--------|--------|--------|-------------|----------|----------|---------|-------------|---------|--------|
| 102400_at   | 381.4  | 335.7  | 310.5  | 293.6  | 352.3  | 377.2  | 323    | 298.8  | 0.779061216 | 330.3    | 337.825  | 7.525   | 0.977725154 | 0.7678  | 1.024  |
| 102401_at   | 437.4  | 259.6  | 274    | 281.5  | 405.3  | 501.8  | 335.2  | 348.7  | 0.183973864 | 313.125  | 397.75   | 84.625  | 0.787240729 | 0.1498  | 1.283  |
| 102402_at   | 2468   | 2568.2 | 2156.2 | 2003.1 | 2304.4 | 2505   | 2147.9 | 2261.3 | 0.971154623 | 2298.875 | 2304.65  | 5.775   | 0.997494197 | 0.9312  | 1.006  |
| 102403_at   | 749.6  | 466.6  | 568.5  | 445.2  | 464.2  | 618.8  | 508.6  | 486.1  | 0.6469678   | 557.475  | 519.425  | 38.05   | 1.073254079 | 0.6959  | -1.057 |
| 102404_at   | 21.3   | 10.2   | 10.9   | 26.2   | 29.9   | 23.8   | 30.7   | 17.9   | 0.142984899 | 17.15    | 25.575   | 8.425   | 0.670576735 | 0.137   | 1.584  |
| 102405_at   | 24.1   | 11.2   | 8.8    | 11.3   | 9.7    | 12     | 7.7    | 13.4   | 0.443632072 | 13.85    | 10.7     | 3.15    | 1.294392523 | 0.451   | -1.223 |
| 102406_at   | 2.8    | 7      | 8.3    | 8.9    | 5.9    | 11.6   | 15.8   | 8.8    | 0.192200051 | 6.75     | 10.525   | 3.775   | 0.641330166 | 0.2169  | 1.592  |
| 102407_at   | 447.1  | 864.4  | 593.3  | 310.4  | 272.6  | 385.2  | 484.6  | 328.6  | 0.21904397  | 553.8    | 367.75   | 186.05  | 1.505914344 | 0.1958  | -1.436 |
| 102408_g_at | 36.8   | 144.9  | 33.7   | 13.2   | 11.8   | 22.9   | 17.9   | 18.9   | 0.27819102  | 57.15    | 17.875   | 39.275  | 3.197202797 | 0.1632  | -2.26  |
| 102409_at   | 1625.8 | 1470.6 | 1844.3 | 1751.8 | 1583.7 | 1436.1 | 1676.1 | 1725.4 | 0.53608036  | 1673.125 | 1605.325 | 67.8    | 1.042234439 | 0.5511  | -1.041 |
| 102410_at   | 69.2   | 84.1   | 90.3   | 81.1   | 76     | 98.7   | 80.7   | 110.5  | 0.314785261 | 81.175   | 91.475   | 10.3    | 0.887400929 | 0.3166  | 1.12   |
| 102411_at   | 185.6  | 185.9  | 228    | 246.3  | 229.4  | 197.3  | 254.5  | 236.4  | 0.392670533 | 211.45   | 229.4    | 17.95   | 0.921752398 | 0.3801  | 1.089  |
| 102412_at   | 1527.4 | 1487.2 | 1420   | 1355.8 | 1502   | 1797.3 | 1502.8 | 1688.7 | 0.092238962 | 1447.6   | 1622.7   | 175.1   | 0.892093425 | 0.07314 | 1.119  |
| 102413_at   | 218.5  | 220.9  | 169.9  | 275.7  | 220.1  | 262.5  | 187.2  | 195.5  | 0.863816295 | 221.25   | 216.325  | 4.925   | 1.022766671 | 0.8983  | 1.017  |
| 102414_i_at | 424.1  | 450    | 435.3  | 560.9  | 417.5  | 418.6  | 590.1  | 545.1  | 0.659740481 | 467.575  | 492.825  | 25.25   | 0.948764775 | 0.685   | 1.048  |
| 102415_r_at | 123.9  | 130.8  | 102.5  | 151.3  | 94.6   | 116.8  | 127.4  | 159.1  | 0.879996882 | 127.125  | 124.475  | 2.65    | 1.021289416 | 0.836   | -1.029 |
| 102416_at   | 2280.5 | 1718.8 | 2308   | 2146.2 | 2858.4 | 2663.6 | 2496.8 | 2321.3 | 0.039189886 | 2113.375 | 2585.025 | 471.65  | 0.817545285 | 0.04579 | 1.228  |
| 102418_at   | 1114.5 | 611    | 1148.8 | 865.7  | 953.9  | 898.9  | 780.1  | 803    | 0.597253222 | 935      | 858.975  | 76.025  | 1.08850665  | 0.7191  | -1.06  |
| 102419_at   | 20.1   | 17.7   | 25     | 31.4   | 47     | 31.9   | 36.2   | 27.9   | 0.057832451 | 23.55    | 35.75    | 12.2    | 0.658741259 | 0.04549 | 1.526  |
| 102421_at   | 583.8  | 505.4  | 438    | 494    | 377.5  | 460.6  | 409.5  | 454.5  | 0.075049441 | 505.3    | 425.525  | 79.775  | 1.187474296 | 0.06502 | -1.185 |
| 102423_at   | 90.9   | 89.4   | 94.7   | 114.8  | 72.4   | 77.3   | 109.2  | 77.8   | 0.24957808  | 97.45    | 84.175   | 13.275  | 1.157707158 | 0.2054  | -1.168 |
| 102424_at   | 43.4   | 62.4   | 53.2   | 73.5   | 45.8   | 92.3   | 60.4   | 64.8   | 0.536721548 | 58.125   | 65.825   | 7.7     | 0.883023167 | 0.5634  | 1.118  |
| 102425_at   | 314.7  | 406.3  | 435.4  | 555.6  | 396.9  | 401.6  | 483.9  | 467.6  | 0.869761004 | 428      | 437.5    | 9.5     | 0.978285714 | 0.7743  | 1.039  |
| 102426_at   | 183.1  | 205.4  | 248.7  | 173    | 232.7  | 266.6  | 214.4  | 294    | 0.089736404 | 202.55   | 251.925  | 49.375  | 0.80400913  | 0.08373 | 1.247  |
| 102427_at   | 2018.9 | 2034.1 | 2224   | 2693.3 | 2236.2 | 1620.2 | 2366.6 | 2087.4 | 0.493635363 | 2242.575 | 2077.6   | 164.975 | 1.079406527 | 0.4862  | -1.083 |
| 102429_at   | 292.2  | 280.6  | 245.3  | 301.4  | 272.8  | 411.9  | 288.9  | 341.1  | 0.222456976 | 279.875  | 328.675  | 48.8    | 0.851525063 | 0.1945  | 1.163  |
| 102430_at   | 324.4  | 200.9  | 189.8  | 201.1  | 231.8  | 262.8  | 198.2  | 235.1  | 0.936557333 | 229.05   | 231.975  | 2.925   | 0.987390883 | 0.8187  | 1.034  |
| 102431_at   | 17.4   | 19.2   | 37.7   | 29.8   | 90.8   | 19.5   | 86     | 68.7   | 0.085904135 | 26.025   | 66.25    | 40.225  | 0.392830189 | 0.08562 | 2.301  |
| 102476_f_at | 1128.9 | 943    | 1022.6 | 1075.9 | 1102   | 1008.2 | 788.4  | 945    | 0.337599206 | 1042.6   | 960.9    | 81.7    | 1.085024456 | 0.3233  | -1.091 |
| 102477_at   | 41.2   | 34.4   | 59.8   | 29     | 25.9   | 80.2   | 50.9   | 53.5   | 0.415493878 | 41.1     | 52.625   | 11.525  | 0.780997625 | 0.4892  | 1.23   |
| 102478_f_at | 217.4  | 175.8  | 194.9  | 178.9  | 189.3  | 198.6  | 171.9  | 187.4  | 0.672554269 | 191.75   | 186.8    | 4.95    | 1.026498929 | 0.6896  | -1.024 |
| 102552_at   | 8.6    | 14.4   | 6.8    | 10     | 6.8    | 17.6   | 7.9    | 19.9   | 0.446355861 | 9.95     | 13.05    | 3.1     | 0.762452107 | 0.5447  | 1.225  |
| 102553_at   | 9.5    | 12.5   | 4.5    | 16.5   | 33.1   | 8.8    | 16.8   | 4.3    | 0.504824433 | 10.75    | 15.75    | 5       | 0.682539683 | 0.6813  | 1.251  |
| 102554_at   | 9.2    | 8.4    | 6.1    | 10.3   | 3.4    | 8.1    | 7.4    | 7.6    | 0.231682625 | 8.5      | 6.625    | 1.875   | 1.283018868 | 0.2729  | -1.325 |
| 102555_at   | 10.5   | 12     | 6.1    | 6.6    | 7.4    | 14.6   | 11.9   | 6.8    | 0.582787368 | 8.8      | 10.175   | 1.375   | 0.864864865 | 0.5958  | 1.149  |
| 102556_at   | 10     | 5.8    | 11.5   | 8.5    | 9.2    | 24.1   | 9.3    | 12.9   | 0.261201201 | 8.95     | 13.875   | 4.925   | 0.645045045 | 0.2018  | 1.47   |
| 102557_at   | 86.3   | 75.4   | 66.7   | 37.6   | 82.2   | 72.2   | 70.7   | 68.9   | 0.558835463 | 66.5     | 73.5     | 7       | 0.904761905 | 0.4726  | 1.154  |
| 102558_at   | 92.2   | 87.9   | 103.6  | 79.4   | 33.8   | 107.1  | 131.4  | 85.1   | 0.950668226 | 90.775   | 89.35    | 1.425   | 1.015948517 | 0.6966  | -1.133 |
| 102559_at   | 6.7    | 15.2   | 28.2   | 7      | 7.1    | 12.5   | 6.7    | 33.1   | 0.945211146 | 14.275   | 14.85    | 0.575   | 0.961279461 | 0.9898  | 1.007  |
| 102560_at   | 5.8    | 8.9    | 5.6    | 6.7    | 8.4    | 13.5   | 39.7   | 8.2    | 0.249977812 | 6.75     | 17.45    | 10.7    | 0.386819484 | 0.1032  | 2.089  |
| 102561_at   | 190    | 379.2  | 221.5  | 233.7  | 348.1  | 302.9  | 243    | 275.2  | 0.484256744 | 256.1    | 292.3    | 36.2    | 0.876154636 | 0.3783  | 1.173  |
| 102562_at   | 165.2  | 178.3  | 215.3  | 198.3  | 245.1  | 164.7  | 231.4  | 188.7  | 0.440022076 | 189.275  | 207.475  | 18.2    | 0.912278588 | 0.4679  | 1.088  |
| 102566_at   | 92.7   | 19.9   | 33.4   | 21.3   | 17.6   | 17.6   | 54.2   | 26.1   | 0.535372696 | 41.825   | 28.875   | 12.95   | 1.448484848 | 0.5573  | -1.317 |
| 102567_at   | 12.2   | 9.8    | 5.7    | 5.7    | 9.6    | 10.7   | 8.7    | 7.7    | 0.658605912 | 8.35     | 9.175    | 0.825   | 0.910081744 | 0.5157  | 1.153  |
| 102568_at   | 11.4   | 11.2   | 11.5   | 17.6   | 10.4   | 44.9   | 20.1   | 11.6   | 0.353765109 | 12.925   | 21.75    | 8.825   | 0.594252874 | 0.3456  | 1.432  |
| 102569_at   | 16.7   | 6.3    | 5.9    | 6.7    | 8.4    | 8.7    | 8.1    | 11.2   | 0.945055315 | 8.9      | 9.1      | 0.2     | 0.978021978 | 0.6673  | 1.122  |
| 102570_at   | 142.5  | 79.5   | 113.6  | 134.7  | 78.6   | 191.2  | 116.6  | 102.7  | 0.873820817 | 117.575  | 122.275  | 4.7     | 0.961562053 | 0.9699  | 1.009  |
| 102571_at   | 12     | 8      | 8.2    | 10.8   | 10.2   | 13.9   | 10.9   | 9.5    | 0.357788894 | 9.75     | 11.125   | 1.375   | 0.876404494 | 0.3395  | 1.146  |
| 102572_at   | 38.5   | 60.3   | 45.5   | 38.8   | 28.5   | 57.4   | 45.6   | 29.7   | 0.549205707 | 45.775   | 40.3     | 5.475   | 1.135856079 | 0.4681  | -1.167 |
| 102573_at   | 10.9   | 9.1    | 7.3    | 6.4    | 4.3    | 16.3   | 37.8   | 10.2   | 0.319180799 | 8.425    | 17.15    | 8.725   | 0.491253644 | 0.3816  | 1.556  |
| 102574_at   | 180    | 81.5   | 120.1  | 142.8  | 46.1   | 157    | 129.1  | 122.3  | 0.598855864 | 131.1    | 113.625  | 17.475  | 1.15379538  | 0.5614  | -1.218 |
| 102575_at   | 104.4  | 24.7   | 59.8   | 91.3   | 58.6   | 104.8  | 81.3   | 102    | 0.460161836 | 70.05    | 86.675   | 16.625  | 0.80819152  | 0.3959  | 1.38   |
| 102576_at   | 74.1   | 49.6   | 41     | 18.8   | 48.1   | 73.6   | 57.7   | 73.7   | 0.243787813 | 45.875   | 63.275   | 17.4    | 0.725009878 | 0.2208  | 1.518  |
| 102577_at   | 94.9   | 56.3   | 74     | 62.5   | 63.6   | 64.7   | 64.6   | 86.3   | 0.84174137  | 71.925   | 69.8     | 2.125   | 1.030444126 | 0.8946  | 1.019  |
| 102578_at   | 17     | 17.4   | 8.6    | 10.3   | 8.1    | 18.7   | 13.6   | 17.7   | 0.729190294 | 13.325   | 14.525   | 1.2     | 0.917383821 | 0.7756  | 1.081  |
| 102579_f_at | 6.1    | 5.3    | 2.5    | 6.4    | 3.7    | 7.1    | 2.8    | 14.3   | 0.531851845 | 5.075    | 6.975    | 1.9     | 0.727598566 | 0.6778  | 1.202  |



|             |         |        |         |        |         |         |         |         |             |         |           |         |             |          |        |
|-------------|---------|--------|---------|--------|---------|---------|---------|---------|-------------|---------|-----------|---------|-------------|----------|--------|
| 102580_r_at | 204.7   | 112.3  | 138.7   | 116.3  | 124.4   | 208.9   | 155.7   | 178.8   | 0.424064986 | 143     | 166.95    | 23.95   | 0.856543875 | 0.3793   | 1.182  |
| 102581_at   | 71.2    | 35.6   | 51      | 52.4   | 42.1    | 59.5    | 51.6    | 34.5    | 0.56121549  | 52.55   | 46.925    | 5.625   | 1.119872136 | 0.592    | -1.11  |
| 102582_at   | 29.9    | 20.4   | 14.9    | 12.5   | 18      | 28.6    | 21.3    | 21.3    | 0.549112892 | 19.425  | 22.3      | 2.875   | 0.871076233 | 0.4349   | 1.196  |
| 102583_at   | 39.5    | 24.6   | 24.7    | 31.4   | 14.8    | 37.6    | 33.4    | 57.6    | 0.573524326 | 30.05   | 35.85     | 5.8     | 0.838214784 | 0.779    | 1.094  |
| 102584_at   | 193.6   | 201.6  | 144.1   | 138.7  | 131.4   | 153.5   | 204.9   | 181.8   | 0.946627877 | 169.5   | 167.9     | 1.6     | 1.009529482 | 0.9491   | -1.009 |
| 102585_f_at | 187.6   | 148.8  | 141.3   | 133.8  | 131.7   | 176.5   | 171.5   | 132     | 0.997762    | 152.875 | 152.925   | 0.05    | 0.999673042 | 0.9944   | 1.001  |
| 102586_at   | 21      | 18     | 13.5    | 15.1   | 8.8     | 13.9    | 12.3    | 17.7    | 0.184162387 | 16.9    | 13.175    | 3.725   | 1.282732448 | 0.1776   | -1.306 |
| 102599_at   | 22887.3 | 24304  | 15805.5 | 19232  | 18290.1 | 19295.7 | 20322.3 | 20617.8 | 0.668416921 | 20557.2 | 19631.475 | 925.725 | 1.047155142 | 0.7501   | -1.034 |
| 102612_at   | 8       | 5.2    | 3.3     | 5.5    | 21.4    | 49.5    | 17.9    | 11.2    | 0.103084202 | 5.5     | 25        | 19.5    | 0.22        | 0.007715 | 4.084  |
| 102613_at   | 10      | 9.4    | 8.7     | 8.5    | 6.3     | 13.6    | 8.9     | 9       | 0.858378144 | 9.15    | 9.45      | 0.3     | 0.968253968 | 0.9758   | 1.005  |
| 102614_at   | 5.5     | 13.2   | 5.2     | 24.5   | 5.6     | 7.4     | 3.3     | 8.4     | 0.284784852 | 12.1    | 6.175     | 5.925   | 1.95951417  | 0.2627   | -1.693 |
| 102619_at   | 22.3    | 17.1   | 10.4    | 19.5   | 14.4    | 26.8    | 15.5    | 18.3    | 0.719680973 | 17.325  | 18.75     | 1.425   | 0.924       | 0.7037   | 1.09   |
| 102620_at   | 19.7    | 14.5   | 12.5    | 15.8   | 8       | 20.7    | 10.8    | 13.7    | 0.49193637  | 15.625  | 13.3      | 2.325   | 1.17481203  | 0.385    | -1.232 |
| 102621_at   | 79.6    | 71.5   | 92.9    | 126.6  | 57.2    | 91      | 117.4   | 83.4    | 0.766119372 | 92.65   | 87.25     | 5.4     | 1.061891117 | 0.7365   | -1.071 |
| 102622_r_at | 30.7    | 46.9   | 13.2    | 6.8    | 23.9    | 35.2    | 8.1     | 21      | 0.833631763 | 24.4    | 22.05     | 2.35    | 1.106575964 | 0.9622   | 1.027  |
| 102623_at   | 21.4    | 12     | 59.8    | 50.9   | 61.1    | 34.1    | 56.1    | 63      | 0.244905151 | 36.025  | 53.575    | 17.55   | 0.672421839 | 0.2144   | 1.751  |
| 102624_at   | 441.2   | 342.5  | 462.6   | 339.8  | 451.5   | 640.2   | 451.8   | 439.8   | 0.144945309 | 396.525 | 495.825   | 99.3    | 0.799727727 | 0.1187   | 1.247  |
| 102625_f_at | 33      | 45.8   | 33.3    | 43.8   | 40.5    | 30.1    | 42      | 53.9    | 0.672720674 | 38.975  | 41.625    | 2.65    | 0.936336336 | 0.7202   | 1.057  |
| 102626_r_at | 109.7   | 108.9  | 125.3   | 106.6  | 137.5   | 130.5   | 72.5    | 119.1   | 0.889548481 | 112.625 | 114.9     | 2.275   | 0.980200174 | 0.9619   | 1.008  |
| 102627_at   | 291.5   | 174.9  | 317.8   | 312.7  | 208     | 243.4   | 166.9   | 240.2   | 0.183298142 | 274.225 | 214.625   | 59.6    | 1.277693652 | 0.2199   | -1.257 |
| 102628_at   | 120.5   | 203    | 105.6   | 163.3  | 142.8   | 162.3   | 83.6    | 125.7   | 0.509105146 | 148.1   | 128.6     | 19.5    | 1.15163297  | 0.5298   | -1.147 |
| 102629_at   | 24      | 19.2   | 20.3    | 13.3   | 12.8    | 25.7    | 16      | 11.4    | 0.515319261 | 19.2    | 16.475    | 2.725   | 1.165402124 | 0.4373   | -1.199 |
| 102630_s_at | 17.9    | 21.4   | 15.5    | 14.7   | 18      | 16.8    | 11.6    | 15.1    | 0.366996411 | 17.375  | 15.375    | 2       | 1.130081301 | 0.3648   | -1.134 |
| 102631_at   | 458.4   | 376.7  | 331.9   | 419    | 420.7   | 359.7   | 464.8   | 427.8   | 0.556875704 | 396.5   | 418.25    | 21.75   | 0.947997609 | 0.5442   | 1.058  |
| 102632_at   | 232     | 203.7  | 208.6   | 252.8  | 244.6   | 237.7   | 352.4   | 283.3   | 0.124607514 | 224.275 | 279.5     | 55.225  | 0.802415027 | 0.0858   | 1.235  |
| 102633_at   | 22.8    | 12.5   | 13.5    | 19.3   | 18.4    | 23.8    | 16.8    | 10.6    | 0.921583256 | 17.025  | 17.4      | 0.375   | 0.978448276 | 0.9512   | 1.014  |
| 102635_at   | 59.6    | 24     | 65.6    | 39.2   | 48.2    | 53.1    | 54      | 60.9    | 0.527214015 | 47.1    | 54.05     | 6.95    | 0.871415356 | 0.4125   | 1.23   |
| 102636_at   | 271.4   | 300.3  | 386.2   | 286    | 283     | 394.8   | 290     | 304.7   | 0.851435533 | 310.975 | 318.125   | 7.15    | 0.977524558 | 0.841    | 1.023  |
| 102637_at   | 193.9   | 134.4  | 208     | 160    | 64.6    | 173     | 178.6   | 152.4   | 0.353336123 | 174.075 | 142.15    | 31.925  | 1.224586704 | 0.3529   | -1.299 |
| 102638_at   | 14.2    | 10.5   | 9.3     | 14.1   | 9.4     | 22.1    | 7.2     | 8.3     | 0.944492694 | 12.025  | 11.75     | 0.275   | 1.023404255 | 0.6862   | -1.123 |
| 102639_at   | 113.9   | 75.8   | 131.2   | 137.1  | 107.2   | 99.7    | 98.7    | 117.4   | 0.581515814 | 114.5   | 105.75    | 8.75    | 1.082742317 | 0.7022   | -1.058 |
| 102640_at   | 21.9    | 20.3   | 12.1    | 16.4   | 10.9    | 25.8    | 19.4    | 23.8    | 0.586114026 | 17.675  | 19.975    | 2.3     | 0.88485607  | 0.6912   | 1.103  |
| 102641_at   | 99      | 146.3  | 109.8   | 135.4  | 127     | 160.3   | 114.1   | 84.6    | 0.955266158 | 122.625 | 121.5     | 1.125   | 1.009259259 | 0.8914   | -1.023 |
| 102642_at   | 389.5   | 272.9  | 366.5   | 345.3  | 296     | 410.5   | 328.7   | 326.5   | 0.932102859 | 343.55  | 340.425   | 3.125   | 1.009179702 | 0.9425   | 1.008  |
| 102643_at   | 136     | 99.7   | 93.5    | 121.2  | 88.8    | 171.4   | 119.6   | 115.3   | 0.5991734   | 112.6   | 123.775   | 11.175  | 0.909715209 | 0.6457   | 1.081  |
| 102644_at   | 645.1   | 608.1  | 747.1   | 763.4  | 843.5   | 667.1   | 897.1   | 915.4   | 0.093046445 | 690.925 | 830.775   | 139.85  | 0.831663206 | 0.09488  | 1.199  |
| 102645_at   | 382.7   | 270.9  | 345.2   | 462    | 391.3   | 382.7   | 354.4   | 375     | 0.808597967 | 365.2   | 375.85    | 10.65   | 0.971664228 | 0.6963   | 1.047  |
| 102646_at   | 507.3   | 525.1  | 600.6   | 668.4  | 476.6   | 552.6   | 506.1   | 697.5   | 0.79010443  | 575.35  | 558.2     | 17.15   | 1.030723755 | 0.7499   | -1.036 |
| 102647_g_at | 1989.2  | 1833.5 | 1602.6  | 1933.5 | 1691.2  | 1728.9  | 1620.2  | 1777.9  | 0.216039596 | 1839.7  | 1704.55   | 135.15  | 1.079287789 | 0.2055   | -1.076 |
| 102648_at   | 30.6    | 9.5    | 19.9    | 6.3    | 6.9     | 15.5    | 9.8     | 31.4    | 0.933486539 | 16.575  | 15.9      | 0.675   | 1.04245283  | 0.9611   | -1.025 |
| 102649_s_at | 528.8   | 553.9  | 374.9   | 478.3  | 580.7   | 539.3   | 436.4   | 321.6   | 0.844189645 | 483.975 | 469.5     | 14.475  | 1.030830671 | 0.7885   | -1.045 |
| 102650_at   | 487.4   | 395.1  | 337     | 620.2  | 493.8   | 539     | 540.7   | 519.7   | 0.382643788 | 459.925 | 523.3     | 63.375  | 0.87889356  | 0.2914   | 1.168  |
| 102651_at   | 164.8   | 130    | 134.7   | 131.4  | 116.2   | 193.3   | 154.8   | 162.1   | 0.405622022 | 140.225 | 156.6     | 16.375  | 0.895434227 | 0.4387   | 1.104  |
| 102652_at   | 54.2    | 15.1   | 42.2    | 47.1   | 25.5    | 20.1    | 54.5    | 24.2    | 0.489026356 | 39.65   | 31.075    | 8.575   | 1.275945294 | 0.5719   | -1.244 |
| 102653_at   | 21.2    | 3.5    | 8.7     | 34.5   | 16.5    | 37.2    | 3.1     | 20.6    | 0.817733825 | 16.975  | 19.35     | 2.375   | 0.877260982 | 0.8558   | 1.15   |
| 102654_at   | 70.7    | 22.7   | 83.9    | 80.3   | 63.2    | 96.7    | 124.2   | 90.1    | 0.174997315 | 64.4    | 93.55     | 29.15   | 0.688401924 | 0.2248   | 1.586  |
| 102655_at   | 75.6    | 56.5   | 44      | 71.1   | 36.9    | 77.5    | 103     | 65.7    | 0.58985515  | 61.8    | 70.775    | 8.975   | 0.873189686 | 0.7216   | 1.098  |
| 102656_at   | 47.5    | 26.7   | 14      | 26.2   | 18.5    | 47      | 23.6    | 19.8    | 0.891256591 | 28.6    | 27.225    | 1.375   | 1.050505051 | 0.9203   | -1.035 |
| 102657_at   | 28.2    | 79     | 19.7    | 24.6   | 21.3    | 33.2    | 42.1    | 31.9    | 0.713540577 | 37.875  | 32.125    | 5.75    | 1.178988327 | 0.9256   | -1.034 |
| 102658_at   | 243.4   | 255.2  | 185.5   | 178.8  | 203.5   | 217.1   | 83.9    | 192.7   | 0.304220726 | 215.725 | 174.3     | 41.425  | 1.237664945 | 0.3152   | -1.303 |
| 102659_at   | 789.6   | 812.4  | 962     | 953.7  | 1175.8  | 1088.3  | 708.1   | 1222.4  | 0.250456956 | 879.425 | 1048.65   | 169.225 | 0.838625852 | 0.29     | 1.171  |
| 102660_at   | 93.5    | 93.1   | 96.3    | 98.7   | 62      | 98.9    | 81.7    | 108.4   | 0.509626084 | 95.4    | 87.75     | 7.65    | 1.087179487 | 0.4296   | -1.111 |
| 102661_at   | 266.6   | 165.3  | 247.2   | 294    | 103.4   | 118.8   | 132.5   | 116.9   | 0.017797367 | 243.275 | 117.9     | 125.375 | 2.063401187 | 0.002107 | -1.966 |
| 102662_at   | 9.7     | 10.1   | 9.1     | 9.5    | 13      | 7.9     | 7.6     | 11.2    | 0.821514579 | 9.6     | 9.925     | 0.325   | 0.967254408 | 0.9542   | 1.008  |
| 102663_at   | 20.7    | 16.2   | 13.6    | 24.1   | 58      | 18.5    | 20.7    | 21.4    | 0.333385052 | 18.65   | 29.65     | 11      | 0.629005059 | 0.2595   | 1.443  |
| 102664_at   | 81.6    | 61.8   | 62.6    | 43.6   | 51.9    | 112.2   | 54.3    | 40.7    | 0.900157562 | 62.4    | 64.775    | 2.375   | 0.96333462  | 0.9487   | -1.017 |



|             |        |       |        |        |       |        |        |        |             |          |          |         |             |          |        |
|-------------|--------|-------|--------|--------|-------|--------|--------|--------|-------------|----------|----------|---------|-------------|----------|--------|
| 102665_at   | 92.9   | 70    | 87.7   | 110.8  | 83.5  | 180.3  | 110.2  | 110.2  | 0.242468039 | 90.35    | 121.05   | 30.7    | 0.746385791 | 0.2032   | 1.304  |
| 102666_at   | 30.2   | 20.8  | 27.3   | 30.4   | 27.9  | 54.7   | 34.7   | 13     | 0.583812243 | 27.175   | 32.575   | 5.4     | 0.834228703 | 0.8324   | 1.072  |
| 102667_at   | 85.5   | 58.9  | 35.4   | 42.4   | 42.3  | 56.5   | 12.9   | 41.3   | 0.276526452 | 55.55    | 38.25    | 17.3    | 1.452287582 | 0.2853   | -1.563 |
| 102668_at   | 119.7  | 107   | 87.7   | 128.9  | 77.4  | 178.1  | 150.2  | 226    | 0.228741445 | 110.825  | 157.925  | 47.1    | 0.701757163 | 0.276    | 1.341  |
| 102669_at   | 9.7    | 6.2   | 3.6    | 2.4    | 5.6   | 5.2    | 3.5    | 5      | 0.721319006 | 5.475    | 4.825    | 0.65    | 1.134715026 | 0.9967   | 1.001  |
| 102670_at   | 682.1  | 625.5 | 585.6  | 768.9  | 602.3 | 440.8  | 665.7  | 657.4  | 0.305356542 | 665.525  | 591.55   | 73.975  | 1.125052827 | 0.3078   | -1.134 |
| 102671_at   | 135.6  | 120.9 | 72.7   | 87.8   | 65.5  | 57.7   | 145.5  | 87     | 0.558056452 | 104.25   | 88.925   | 15.325  | 1.172336238 | 0.4652   | -1.216 |
| 102672_g_at | 163.2  | 96.1  | 112.8  | 126.6  | 78.7  | 141.1  | 135.4  | 120.5  | 0.784036006 | 124.675  | 118.925  | 5.75    | 1.0483498   | 0.7715   | -1.054 |
| 102673_at   | 59.2   | 16.1  | 40     | 88.5   | 45.1  | 77.4   | 70     | 57.8   | 0.526732039 | 50.95    | 62.575   | 11.625  | 0.814222932 | 0.3864   | 1.431  |
| 102674_at   | 0.7    | 1.5   | 6.9    | 4      | 0.5   | 2.9    | 0.5    | 12     | 0.829738782 | 3.275    | 3.975    | 0.7     | 0.823899371 | 0.7727   | -1.325 |
| 102675_at   | 32.7   | 60.7  | 76.4   | 76.5   | 100.8 | 77     | 113.6  | 75.9   | 0.072333399 | 61.575   | 91.825   | 30.25   | 0.670569017 | 0.09843  | 1.55   |
| 102676_at   | 216.5  | 139.5 | 208.1  | 199.9  | 133.3 | 134.2  | 233.1  | 190.2  | 0.563911421 | 191      | 172.7    | 18.3    | 1.1059641   | 0.5254   | -1.122 |
| 102677_at   | 704.8  | 746.2 | 609.2  | 676.8  | 731.5 | 535.5  | 457.9  | 537.4  | 0.13589167  | 684.25   | 565.575  | 118.675 | 1.209830703 | 0.1071   | -1.225 |
| 102678_at   | 238    | 198.4 | 207.1  | 240    | 207.9 | 260.3  | 216.5  | 215.7  | 0.800012941 | 220.875  | 225.1    | 4.225   | 0.981230564 | 0.8006   | 1.019  |
| 102679_at   | 194.9  | 143.6 | 141.2  | 167.6  | 175.4 | 180.1  | 116.7  | 106.5  | 0.487649735 | 161.825  | 144.675  | 17.15   | 1.118541559 | 0.4332   | -1.14  |
| 102680_g_at | 147.3  | 71.3  | 92.8   | 95.8   | 96.8  | 152.9  | 39.7   | 92.5   | 0.830781112 | 101.8    | 95.475   | 6.325   | 1.066247709 | 0.6856   | -1.145 |
| 102681_at   | 39.7   | 85.5  | 41.5   | 83.3   | 82    | 126.4  | 53.5   | 80.8   | 0.28510313  | 62.5     | 85.675   | 23.175  | 0.729501021 | 0.2686   | 1.398  |
| 102682_at   | 153.5  | 79.2  | 119.7  | 107.7  | 102.9 | 147    | 111.2  | 88.6   | 0.899897874 | 115.025  | 112.425  | 2.6     | 1.023126529 | 0.9444   | 1.013  |
| 102683_at   | 1392.6 | 1059  | 1102.4 | 1133.1 | 976.2 | 1635.3 | 1115.4 | 1141.4 | 0.792689858 | 1171.775 | 1217.075 | 45.3    | 0.962779615 | 0.8521   | 1.025  |
| 102684_at   | 56.4   | 54.9  | 25.9   | 39     | 31.7  | 56.4   | 28.8   | 45.2   | 0.727254257 | 44.05    | 40.525   | 3.525   | 1.086983344 | 0.7681   | -1.077 |
| 102685_at   | 17.7   | 5.5   | 13     | 11.7   | 5.7   | 22.2   | 3.2    | 4.7    | 0.580810983 | 11.975   | 8.95     | 3.025   | 1.337988827 | 0.3346   | -1.672 |
| 102686_at   | 425    | 448.3 | 487.3  | 474.7  | 366.7 | 503.3  | 459.8  | 452.1  | 0.694342871 | 458.825  | 445.475  | 13.35   | 1.029968012 | 0.6544   | -1.035 |
| 102687_at   | 8.3    | 30.4  | 28.8   | 15.1   | 5.3   | 14.5   | 56.2   | 40     | 0.549181612 | 20.65    | 29       | 8.35    | 0.712068966 | 0.8588   | 1.121  |
| 102688_f_at | 11.2   | 12.2  | 7      | 7.7    | 6.6   | 12.2   | 22.1   | 6.5    | 0.583969838 | 9.525    | 11.85    | 2.325   | 0.803797468 | 0.7393   | 1.119  |
| 102689_at   | 277    | 244.5 | 316    | 326.9  | 196.1 | 286.8  | 318.9  | 284.2  | 0.569617577 | 291.1    | 271.5    | 19.6    | 1.072191529 | 0.5513   | -1.082 |
| 102690_at   | 35.3   | 22.6  | 19.5   | 17.9   | 20.4  | 31.4   | 21.4   | 32.8   | 0.620370804 | 23.825   | 26.5     | 2.675   | 0.899056604 | 0.5619   | 1.128  |
| 102691_at   | 434.5  | 427.8 | 474.1  | 459.1  | 469.4 | 498.3  | 299.6  | 374.3  | 0.464868176 | 448.875  | 410.4    | 38.475  | 1.09375     | 0.3957   | -1.114 |
| 102692_s_at | 75.3   | 23.8  | 25.3   | 38.9   | 13.9  | 61.7   | 37.8   | 29.5   | 0.755058003 | 40.825   | 35.725   | 5.1     | 1.142757173 | 0.7199   | -1.166 |
| 102693_f_at | 21.8   | 13.3  | 10.2   | 12.8   | 29.3  | 23.1   | 14.3   | 12.8   | 0.298023934 | 14.525   | 19.875   | 5.35    | 0.73081761  | 0.2876   | 1.345  |
| 102694_at   | 1.4    | 1     | 1.2    | 1      | 7.7   | 1.6    | 1      | 3.3    | 0.233925469 | 1.15     | 3.4      | 2.25    | 0.338235294 | 0.1404   | 2.184  |
| 102695_at   | 96.8   | 78.4  | 58.7   | 78.9   | 51.3  | 87.1   | 55.4   | 100.5  | 0.759462021 | 78.2     | 73.575   | 4.625   | 1.062861026 | 0.6714   | -1.091 |
| 102696_s_at | 111.9  | 84    | 227.7  | 216.4  | 64.3  | 132.9  | 240.8  | 162.7  | 0.855148301 | 160      | 150.175  | 9.825   | 1.065423672 | 0.8342   | -1.084 |
| 102697_at   | 306.1  | 348.2 | 444.7  | 334.6  | 352.6 | 419.9  | 400.1  | 417.3  | 0.306218334 | 358.4    | 397.475  | 39.075  | 0.90169193  | 0.262    | 1.117  |
| 102698_at   | 98.3   | 63    | 106.5  | 91.3   | 63.7  | 128.9  | 85.9   | 86.9   | 0.927744518 | 89.775   | 91.35    | 1.575   | 0.982758621 | 0.9818   | 1.004  |
| 102699_at   | 66.7   | 44.1  | 43.6   | 27.3   | 38.2  | 63.4   | 49.2   | 48.8   | 0.660509666 | 45.425   | 49.9     | 4.475   | 0.910320641 | 0.5683   | 1.135  |
| 102700_at   | 19.8   | 3.1   | 6.1    | 19.1   | 11.7  | 7.8    | 5.5    | 8.6    | 0.473009704 | 12.025   | 8.4      | 3.625   | 1.431547619 | 0.8079   | -1.13  |
| 102701_at   | 61.6   | 72.7  | 31.1   | 41.6   | 17.6  | 43.8   | 56.3   | 73.8   | 0.806645112 | 51.75    | 47.875   | 3.875   | 1.080939948 | 0.6989   | -1.16  |
| 102702_at   | 117    | 155   | 115.3  | 115.1  | 112.9 | 141.4  | 136.1  | 163    | 0.404335047 | 125.6    | 138.35   | 12.75   | 0.907842429 | 0.3935   | 1.101  |
| 102703_s_at | 6.7    | 5.7   | 4.5    | 2.5    | 11.1  | 6      | 5.6    | 3.8    | 0.373178504 | 4.85     | 6.625    | 1.775   | 0.732075472 | 0.3774   | 1.343  |
| 102704_at   | 46.2   | 27.1  | 12.5   | 20.9   | 13.1  | 33.9   | 6.8    | 30.7   | 0.589893539 | 26.675   | 21.125   | 5.55    | 1.262721893 | 0.5259   | -1.37  |
| 102705_at   | 1.9    | 2.9   | 2      | 3      | 3.6   | 3.5    | 2.2    | 2.3    | 0.382491164 | 2.45     | 2.9      | 0.45    | 0.844827586 | 0.398    | 1.173  |
| 102706_i_at | 30.2   | 31.3  | 23.3   | 28.4   | 26.1  | 56.3   | 43.8   | 26.8   | 0.267122483 | 28.3     | 38.25    | 9.95    | 0.739869281 | 0.2513   | 1.289  |
| 102707_f_at | 201.7  | 244.2 | 201.7  | 167.7  | 233.5 | 282.1  | 263.3  | 218.6  | 0.075920486 | 203.825  | 249.375  | 45.55   | 0.817343358 | 0.0757   | 1.228  |
| 102708_at   | 20.3   | 62.3  | 36.2   | 13.1   | 43.1  | 72.6   | 39.1   | 21.5   | 0.492956785 | 32.975   | 44.075   | 11.1    | 0.748156551 | 0.4149   | 1.447  |
| 102709_at   | 20.8   | 40.3  | 17.8   | 32.1   | 39.4  | 30.5   | 38     | 48.9   | 0.129566648 | 27.75    | 39.2     | 11.45   | 0.707908163 | 0.1209   | 1.467  |
| 102710_at   | 67.2   | 80.1  | 96.1   | 88.6   | 85.3  | 99.2   | 74.5   | 92.9   | 0.565165059 | 83       | 87.975   | 4.975   | 0.943449844 | 0.5606   | 1.063  |
| 102711_at   | 222.4  | 234.5 | 190    | 239.1  | 210   | 225.8  | 211.2  | 187.5  | 0.384223257 | 221.5    | 208.625  | 12.875  | 1.061713601 | 0.405    | -1.06  |
| 102712_at   | 12.7   | 15    | 6.6    | 44.9   | 79.1  | 100    | 21.6   | 233.2  | 0.140570665 | 19.8     | 108.475  | 88.675  | 0.182530537 | 0.0411   | 5.147  |
| 102713_at   | 1075.9 | 935.7 | 1473.7 | 1488.8 | 709.1 | 1331   | 1703.7 | 1066.7 | 0.87743493  | 1243.525 | 1202.625 | 40.9    | 1.034008939 | 0.7828   | -1.065 |
| 102714_at   | 188.4  | 143.3 | 111.7  | 118.3  | 88.2  | 39.8   | 100.6  | 138.1  | 0.118957097 | 140.425  | 91.675   | 48.75   | 1.531769839 | 0.1365   | -1.644 |
| 102715_at   | 48.7   | 54.1  | 92.6   | 104.8  | 57.4  | 61.9   | 109.2  | 116.9  | 0.607619105 | 75.05    | 86.35    | 11.3    | 0.869137232 | 0.6102   | 1.154  |
| 102716_at   | 152.3  | 31.4  | 103.4  | 59.1   | 59.1  | 82.5   | 148.5  | 39.3   | 0.909871233 | 86.55    | 82.35    | 4.2     | 1.051001821 | 0.988    | 1.007  |
| 102717_at   | 4.2    | 22.7  | 5.1    | 6.2    | 5.8   | 13.5   | 4.9    | 10.2   | 0.853433012 | 9.55     | 8.6      | 0.95    | 1.110465116 | 0.8865   | 1.07   |
| 102718_at   | 12     | 8     | 9      | 2.6    | 14.4  | 16.7   | 5.2    | 11.3   | 0.256438059 | 7.9      | 11.9     | 4       | 0.663865546 | 0.325    | 1.579  |
| 102719_f_at | 1.6    | 6.2   | 1.6    | 1.1    | 8.5   | 5.8    | 6.5    | 5.7    | 0.035615461 | 2.625    | 6.625    | 4       | 0.396226415 | 0.02428  | 3.228  |
| 102720_at   | 130.4  | 130.3 | 144.1  | 132.6  | 146.6 | 155.6  | 148.3  | 147.1  | 0.011541995 | 134.35   | 149.4    | 15.05   | 0.899263722 | 0.008517 | 1.112  |



|             |        |        |        |        |        |        |        |        |             |          |          |        |             |           |        |
|-------------|--------|--------|--------|--------|--------|--------|--------|--------|-------------|----------|----------|--------|-------------|-----------|--------|
| 102721_at   | 112.7  | 84.5   | 80.2   | 126.2  | 67.1   | 104.9  | 112.7  | 57     | 0.416091125 | 100.9    | 85.425   | 15.475 | 1.181153058 | 0.3811    | -1.208 |
| 102722_g_at | 10.4   | 41     | 10.3   | 14     | 21.9   | 43.9   | 12.2   | 33     | 0.415841554 | 18.925   | 27.75    | 8.825  | 0.681981982 | 0.3238    | 1.587  |
| 102723_at   | 5.3    | 5.2    | 3.4    | 3.6    | 2.2    | 5.6    | 2.4    | 3      | 0.300929159 | 4.375    | 3.3      | 1.075  | 1.325757576 | 0.2119    | -1.412 |
| 102724_at   | 143.4  | 108    | 89.7   | 118.2  | 135.2  | 104.3  | 131.4  | 131.9  | 0.450198048 | 114.825  | 125.7    | 10.875 | 0.913484487 | 0.4197    | 1.105  |
| 102725_at   | 33.6   | 59.6   | 34.6   | 40.8   | 42.6   | 30.7   | 22.7   | 33.3   | 0.232789396 | 42.15    | 32.325   | 9.825  | 1.303944316 | 0.2054    | -1.301 |
| 102726_at   | 26.4   | 31.8   | 20.5   | 26     | 9.9    | 15.5   | 10     | 25.7   | 0.054784212 | 26.175   | 15.275   | 10.9   | 1.713584288 | 0.04677   | -1.834 |
| 102727_at   | 180.8  | 147.4  | 149.6  | 131.9  | 176.9  | 133.7  | 123.9  | 155.2  | 0.760064345 | 152.425  | 147.425  | 5      | 1.03391555  | 0.7365    | -1.037 |
| 102728_f_at | 10.2   | 8.4    | 7.9    | 6.4    | 7.7    | 11.9   | 6      | 6      | 0.847262449 | 8.225    | 7.9      | 0.325  | 1.041139241 | 0.7405    | -1.067 |
| 102729_f_at | 22.8   | 6.7    | 11.6   | 18.6   | 12     | 24.4   | 18.6   | 13.4   | 0.65113216  | 14.925   | 17.1     | 2.175  | 0.872807018 | 0.558     | 1.216  |
| 102730_at   | 13.9   | 8.1    | 13.8   | 19     | 7.7    | 29     | 27     | 9.2    | 0.499575283 | 13.7     | 18.225   | 4.525  | 0.751714678 | 0.701     | 1.171  |
| 102731_g_at | 196.4  | 202.9  | 197.2  | 202.6  | 264.6  | 174.8  | 168.9  | 264.4  | 0.541689889 | 199.775  | 218.175  | 18.4   | 0.915664031 | 0.6213    | 1.067  |
| 102732_at   | 245.8  | 238.5  | 296.2  | 280.1  | 195.4  | 281.8  | 173.8  | 191.7  | 0.110395651 | 265.15   | 210.675  | 54.475 | 1.258573632 | 0.08443   | -1.276 |
| 102733_at   | 6.6    | 8      | 1.7    | 7.1    | 4.3    | 3      | 2.3    | 16.9   | 0.845533264 | 5.85     | 6.625    | 0.775  | 0.883018868 | 0.9285    | -1.055 |
| 102734_at   | 1081.8 | 960.6  | 1091.1 | 1166.5 | 1377.2 | 1246.8 | 1367.8 | 1199.4 | 0.011017455 | 1075     | 1297.8   | 222.8  | 0.828324857 | 0.01183   | 1.208  |
| 102735_at   | 2.3    | 2.7    | 2.8    | 1.5    | 2.7    | 3.7    | 2.5    | 1.3    | 0.711626778 | 2.325    | 2.55     | 0.225  | 0.911764706 | 0.8752    | 1.044  |
| 102736_at   | 13.9   | 19.3   | 43.1   | 23.1   | 26.9   | 69.7   | 60.1   | 67.1   | 0.044721291 | 24.85    | 55.95    | 31.1   | 0.444146559 | 0.04348   | 2.304  |
| 102737_at   | 250.5  | 262.1  | 285.2  | 323.4  | 162.6  | 135.6  | 135.3  | 134.5  | 0.001297277 | 280.3    | 142      | 138.3  | 1.973943662 | 0.0000863 | -1.971 |
| 102738_s_at | 384.8  | 296.9  | 394.1  | 354.8  | 200.3  | 379.4  | 217.5  | 179.2  | 0.084093162 | 357.65   | 244.1    | 113.55 | 1.465178206 | 0.05657   | -1.524 |
| 102739_s_at | 4.1    | 6.5    | 4.6    | 5.5    | 6.6    | 10     | 2.6    | 8.7    | 0.355406988 | 5.175    | 6.975    | 1.8    | 0.741935484 | 0.5468    | 1.225  |
| 102740_at   | 56.1   | 74.1   | 95.2   | 93.8   | 70.3   | 91.2   | 80.6   | 89.3   | 0.782638013 | 79.8     | 82.85    | 3.05   | 0.963186482 | 0.7062    | 1.056  |
| 102741_at   | 29.3   | 37.9   | 55.5   | 46.3   | 13.8   | 80.5   | 60.8   | 63.6   | 0.465142364 | 42.25    | 54.675   | 12.425 | 0.772748057 | 0.8178    | 1.108  |
| 102742_g_at | 58.5   | 65     | 81.5   | 68.6   | 94.4   | 91.9   | 69.7   | 63.3   | 0.269184517 | 68.4     | 79.825   | 11.425 | 0.856874413 | 0.2707    | 1.159  |
| 102743_at   | 55.9   | 33.8   | 150.2  | 128.2  | 72.7   | 60.3   | 125.6  | 112.9  | 0.97992957  | 92.025   | 92.875   | 0.85   | 0.990847914 | 0.7451    | 1.143  |
| 102744_at   | 6.7    | 6.9    | 3      | 6.3    | 3.7    | 9.5    | 2.4    | 6.7    | 0.938109489 | 5.725    | 5.575    | 0.15   | 1.02690583  | 0.7738    | -1.115 |
| 102745_at   | 74.1   | 43.7   | 25.6   | 38.8   | 41.7   | 63.3   | 49     | 30.5   | 0.964575043 | 45.55    | 46.125   | 0.575  | 0.987533875 | 0.8565    | 1.052  |
| 102746_at   | 18.7   | 27.3   | 21.5   | 21.1   | 24.3   | 29.3   | 21.3   | 25.9   | 0.263591492 | 22.15    | 25.2     | 3.05   | 0.878968254 | 0.2537    | 1.139  |
| 102747_at   | 99     | 50.7   | 55.6   | 61     | 71.7   | 81     | 93.4   | 63     | 0.442001936 | 66.575   | 77.275   | 10.7   | 0.861533484 | 0.3476    | 1.19   |
| 102748_at   | 15.2   | 16     | 14.5   | 4.2    | 45     | 25.9   | 25.6   | 36     | 0.012822731 | 12.475   | 33.125   | 20.65  | 0.376603774 | 0.02231   | 2.919  |
| 102749_at   | 49.8   | 128.8  | 65.3   | 69.4   | 100.4  | 60.3   | 63.5   | 59.3   | 0.725049918 | 78.325   | 70.875   | 7.45   | 1.105114638 | 0.8075    | -1.062 |
| 102750_at   | 631.9  | 624.4  | 671.4  | 598    | 545.8  | 486.9  | 463.9  | 557.9  | 0.006855343 | 631.425  | 513.625  | 117.8  | 1.229350207 | 0.006126  | -1.232 |
| 102751_at   | 542.7  | 569.5  | 568.8  | 746.9  | 408.5  | 566.4  | 552.2  | 665.1  | 0.437345263 | 606.975  | 548.05   | 58.925 | 1.107517562 | 0.4175    | -1.115 |
| 102752_at   | 1652.2 | 1875.3 | 1838.4 | 1745.6 | 1804.9 | 1313.3 | 1710.2 | 1463.7 | 0.169144532 | 1777.875 | 1573.025 | 204.85 | 1.130226792 | 0.1492    | -1.138 |
| 102753_at   | 97.7   | 113.3  | 252.8  | 189.1  | 124.9  | 52     | 217.4  | 209.9  | 0.826328139 | 163.225  | 151.05   | 12.175 | 1.08060245  | 0.7298    | -1.156 |
| 102754_at   | 325.1  | 428.1  | 426.1  | 538.4  | 489.7  | 465.6  | 483.5  | 494.1  | 0.305689965 | 429.425  | 483.225  | 53.8   | 0.888664701 | 0.2463    | 1.143  |
| 102755_at   | 189.4  | 96.1   | 112.8  | 171.2  | 122.5  | 208.7  | 161.7  | 137.2  | 0.62467754  | 142.375  | 157.525  | 15.15  | 0.90382479  | 0.5703    | 1.127  |
| 102758_at   | 131    | 152    | 207.2  | 181.2  | 196.9  | 187.2  | 231.4  | 226.4  | 0.08343066  | 167.85   | 210.475  | 42.625 | 0.797481886 | 0.08038   | 1.268  |
| 102759_at   | 221    | 187.9  | 286    | 254.3  | 256.7  | 201.7  | 193.1  | 254    | 0.700745352 | 237.3    | 226.375  | 10.925 | 1.048260629 | 0.7251    | -1.044 |
| 102761_at   | 493.7  | 461.2  | 498.1  | 435.9  | 500.7  | 413    | 434.9  | 496.2  | 0.692987898 | 472.225  | 461.2    | 11.025 | 1.02390503  | 0.6713    | 1.026  |
| 102762_r_at | 87.4   | 79.5   | 50.1   | 65.3   | 45.9   | 94.5   | 68.7   | 49.4   | 0.683720403 | 70.575   | 64.625   | 5.95   | 1.092069632 | 0.6179    | -1.114 |
| 102763_at   | 6.4    | 6.5    | 4.1    | 6.3    | 4.9    | 9.8    | 4.6    | 7.7    | 0.532027135 | 5.825    | 6.75     | 0.925  | 0.862962963 | 0.6224    | 1.119  |
| 102764_at   | 346.5  | 299.1  | 360.8  | 405.4  | 344.9  | 416.2  | 363.6  | 355    | 0.555643461 | 352.95   | 369.925  | 16.975 | 0.95411232  | 0.5313    | 1.051  |
| 102765_at   | 482.1  | 519.7  | 452.7  | 551.7  | 425.3  | 466.8  | 462.5  | 472.6  | 0.13085505  | 501.55   | 456.8    | 44.75  | 1.097964098 | 0.1135    | -1.096 |
| 102766_at   | 32.2   | 38.2   | 12.1   | 29.4   | 42     | 43.5   | 31.8   | 28.4   | 0.262456481 | 27.975   | 36.425   | 8.45   | 0.768016472 | 0.2782    | 1.393  |
| 102767_at   | 2122.4 | 2047   | 2481.7 | 2482.5 | 1568.6 | 1615.1 | 1822.1 | 1896   | 0.009365972 | 2283.4   | 1725.45  | 557.95 | 1.323364919 | 0.006548  | -1.322 |
| 102768_i_at | 112.7  | 111.3  | 104    | 175.6  | 136    | 133.7  | 165.3  | 161.9  | 0.273180155 | 125.9    | 149.225  | 23.325 | 0.843692411 | 0.2051    | 1.207  |
| 102769_f_at | 126.3  | 135.6  | 128    | 145.2  | 190.7  | 140.4  | 155.5  | 259.6  | 0.139766009 | 133.775  | 186.55   | 52.775 | 0.717099973 | 0.07048   | 1.357  |
| 102770_at   | 144.4  | 180.9  | 76.3   | 123    | 152.4  | 165.3  | 79     | 180.4  | 0.690118393 | 131.15   | 144.275  | 13.125 | 0.909027898 | 0.7279    | 1.1    |
| 102771_at   | 728.9  | 610.4  | 922.9  | 1034.9 | 748.1  | 521.8  | 911.1  | 998.2  | 0.842029125 | 824.275  | 794.8    | 29.475 | 1.037084801 | 0.8171    | -1.046 |
| 102772_at   | 552.6  | 670.4  | 910.2  | 1107.2 | 790.7  | 642.9  | 918.8  | 1044   | 0.805589114 | 810.1    | 849.1    | 39     | 0.954069014 | 0.7332    | 1.069  |
| 102773_at   | 22.2   | 15     | 18.9   | 28.6   | 19.3   | 16.3   | 24.5   | 33.9   | 0.647592285 | 21.175   | 23.5     | 2.325  | 0.90106383  | 0.6708    | 1.098  |
| 102774_at   | 19.3   | 16.1   | 23.4   | 11.8   | 47.7   | 46.4   | 16.8   | 57.7   | 0.064592166 | 17.65    | 42.15    | 24.5   | 0.418742586 | 0.04248   | 2.238  |
| 102776_at   | 401.4  | 476.3  | 546.7  | 484.5  | 589.5  | 443.3  | 442.4  | 505.7  | 0.707888767 | 477.225  | 495.225  | 18     | 0.963652885 | 0.7126    | 1.037  |
| 102777_at   | 17.7   | 10.4   | 9.5    | 12.4   | 8.8    | 21.8   | 9.7    | 15.3   | 0.707146772 | 12.5     | 13.9     | 1.4    | 0.899280576 | 0.7958    | 1.07   |
| 102778_at   | 103.6  | 175.9  | 68.8   | 33.1   | 103.8  | 135.2  | 58.5   | 82.2   | 0.990702637 | 95.35    | 94.925   | 0.425  | 1.004477219 | 0.7684    | 1.129  |
| 102779_at   | 230.5  | 249.3  | 180.1  | 261.4  | 133.7  | 111.1  | 265.2  | 185    | 0.208331121 | 230.325  | 173.75   | 56.575 | 1.325611511 | 0.1666    | -1.388 |
| 102780_at   | 50.3   | 42.7   | 58.8   | 70.2   | 64.5   | 56.8   | 80.9   | 60.1   | 0.253118802 | 55.5     | 65.575   | 10.075 | 0.846359131 | 0.2346    | 1.19   |



|             |        |        |        |        |        |        |        |        |             |          |          |         |             |          |        |
|-------------|--------|--------|--------|--------|--------|--------|--------|--------|-------------|----------|----------|---------|-------------|----------|--------|
| 102781_at   | 930.7  | 855.8  | 961.4  | 1445.1 | 1417.7 | 1098.6 | 1122.9 | 1542.6 | 0.20552896  | 1048.25  | 1295.45  | 247.2   | 0.809178278 | 0.1735   | 1.25   |
| 102782_at   | 251.9  | 531    | 501.5  | 237.1  | 488.7  | 411.6  | 297.4  | 370.3  | 0.900993496 | 380.375  | 392      | 11.625  | 0.970344388 | 0.7419   | 1.086  |
| 102783_at   | 363    | 365    | 373.2  | 441.6  | 445.4  | 474.6  | 451.4  | 428.1  | 0.033060972 | 385.7    | 449.875  | 64.175  | 0.857349264 | 0.02235  | 1.17   |
| 102784_at   | 132.4  | 192.8  | 195.4  | 129.7  | 202.8  | 77.2   | 199.9  | 194.5  | 0.872158573 | 162.575  | 168.6    | 6.025   | 0.964264531 | 0.9552   | -1.016 |
| 102785_at   | 10.7   | 8.4    | 6.3    | 2.6    | 2.3    | 4.2    | 4.8    | 8      | 0.342667787 | 7        | 4.825    | 2.175   | 1.450777202 | 0.4253   | -1.405 |
| 102786_at   | 1425.4 | 1226.4 | 1227.1 | 1243.9 | 1152.8 | 1299.5 | 1508   | 1212.4 | 0.896881966 | 1280.7   | 1293.175 | 12.475  | 0.9903532   | 0.9276   | 1.007  |
| 102787_at   | 961.3  | 1112.4 | 1546.3 | 1671.7 | 1151.3 | 1157.4 | 1342.1 | 1357.1 | 0.714013455 | 1322.925 | 1251.975 | 70.95   | 1.056670461 | 0.8233   | -1.033 |
| 102788_s_at | 7.1    | 4      | 3.6    | 5.1    | 5.4    | 7.3    | 3.6    | 6.8    | 0.496870907 | 4.95     | 5.775    | 0.825   | 0.857142857 | 0.5143   | 1.165  |
| 102789_at   | 251.1  | 218.9  | 231.2  | 273.9  | 188.4  | 397.4  | 245.6  | 250.2  | 0.600047424 | 243.775  | 270.4    | 26.625  | 0.901534763 | 0.6822   | 1.072  |
| 102790_at   | 3650.2 | 3614.9 | 3879.1 | 3425   | 3956.4 | 3363   | 3141.8 | 3421.3 | 0.424957138 | 3642.3   | 3470.625 | 171.675 | 1.049465154 | 0.3886   | -1.052 |
| 102791_at   | 136    | 148.7  | 131.7  | 112    | 173.1  | 179.6  | 165.9  | 151.3  | 0.011877055 | 132.1    | 167.475  | 35.375  | 0.788774444 | 0.01366  | 1.272  |
| 102792_at   | 865    | 739.3  | 1209.4 | 1328   | 693.9  | 736.5  | 845.6  | 861.4  | 0.168462095 | 1035.425 | 784.35   | 251.075 | 1.32010582  | 0.1369   | -1.289 |
| 102793_at   | 41.2   | 13.5   | 14     | 25.1   | 25.3   | 33.6   | 19.6   | 26.2   | 0.720125465 | 23.45    | 26.175   | 2.725   | 0.895893028 | 0.5106   | 1.222  |
| 102794_at   | 37.6   | 50.3   | 44.7   | 52.7   | 60.9   | 63.1   | 70.3   | 73.7   | 0.00384635  | 46.325   | 67       | 20.675  | 0.69141791  | 0.005318 | 1.454  |
| 102795_at   | 52.8   | 37.1   | 39.9   | 23.8   | 28.3   | 39.2   | 32.3   | 54.2   | 0.990706486 | 38.4     | 38.5     | 0.1     | 0.997402597 | 0.9616   | 1.011  |
| 102796_at   | 620.3  | 514.3  | 609.6  | 533.3  | 563.7  | 635.3  | 332.3  | 639.4  | 0.747159835 | 569.375  | 542.675  | 26.7    | 1.049200719 | 0.6501   | -1.081 |
| 102797_at   | 279.9  | 233.5  | 228.9  | 337    | 255    | 306.9  | 299    | 317.6  | 0.429724366 | 269.825  | 294.625  | 24.8    | 0.915825202 | 0.3809   | 1.102  |
| 102798_at   | 65.6   | 73.1   | 59.5   | 95.6   | 36.9   | 72.6   | 63.8   | 83.9   | 0.501399635 | 73.45    | 64.3     | 9.15    | 1.142301711 | 0.4666   | -1.174 |
| 102799_at   | 27     | 4      | 18.3   | 21.8   | 24     | 45.9   | 19.8   | 18.9   | 0.290205786 | 17.775   | 27.15    | 9.375   | 0.654696133 | 0.285    | 1.752  |
| 102800_at   | 97.8   | 48.2   | 117.1  | 174.6  | 30.5   | 74.4   | 74.5   | 53.9   | 0.144706295 | 109.425  | 58.325   | 51.1    | 1.876125161 | 0.1351   | -1.804 |
| 102801_at   | 12.7   | 9.1    | 4.3    | 39.4   | 8.2    | 45.1   | 9.6    | 44.7   | 0.452461882 | 16.375   | 26.9     | 10.525  | 0.608736059 | 0.459    | 1.68   |
| 102802_at   | 52.1   | 40     | 43.8   | 74.3   | 78.9   | 65.4   | 60.7   | 50.4   | 0.290599557 | 52.55    | 63.85    | 11.3    | 0.823022709 | 0.2491   | 1.235  |
| 102803_at   | 315.7  | 224.1  | 233.5  | 299.7  | 176    | 280.2  | 283.7  | 233    | 0.491984048 | 268.25   | 243.225  | 25.025  | 1.102888272 | 0.4869   | -1.11  |
| 102804_at   | 471.9  | 320    | 346.6  | 388.5  | 305.9  | 515.8  | 393.8  | 299.3  | 0.961646554 | 381.75   | 378.7    | 3.05    | 1.008053868 | 0.889    | -1.023 |
| 102805_at   | 66.4   | 52.6   | 56.4   | 49.7   | 61.9   | 68     | 59.6   | 39.9   | 0.885495516 | 56.275   | 57.35    | 1.075   | 0.981255449 | 0.9682   | 1.006  |
| 102806_g_at | 7.6    | 24     | 5.7    | 9.3    | 5.5    | 7.1    | 29.5   | 7.2    | 0.927638898 | 11.65    | 12.325   | 0.675   | 0.945233266 | 0.9418   | -1.038 |
| 102807_at   | 1064.4 | 881.3  | 1037.2 | 1002.1 | 745.2  | 818.9  | 812.7  | 928.2  | 0.022027311 | 996.25   | 826.25   | 170     | 1.205748865 | 0.02267  | -1.206 |
| 102808_at   | 77     | 42.5   | 46.4   | 31.6   | 32     | 25.7   | 62     | 23.5   | 0.34354352  | 49.375   | 35.8     | 13.575  | 1.379189944 | 0.272    | -1.415 |
| 102809_s_at | 140.6  | 129.5  | 120.2  | 133.6  | 122.2  | 161    | 109.2  | 138.6  | 0.889441088 | 130.975  | 132.75   | 1.775   | 0.986629002 | 0.9609   | 1.005  |
| 102811_at   | 606.3  | 751    | 654.9  | 810.5  | 903.9  | 685.5  | 912    | 942.1  | 0.086382682 | 705.675  | 860.875  | 155.2   | 0.81971831  | 0.09248  | 1.218  |
| 102812_i_at | 871.4  | 608.9  | 505.6  | 542.3  | 642.1  | 758.6  | 744.8  | 692.9  | 0.426953308 | 632.05   | 709.6    | 77.55   | 0.890713078 | 0.3224   | 1.147  |
| 102813_f_at | 382.1  | 466.3  | 489    | 518.9  | 508    | 399.1  | 643.5  | 440.4  | 0.606622009 | 464.075  | 497.75   | 33.675  | 0.932345555 | 0.6435   | 1.062  |
| 102814_f_at | 13.4   | 6.6    | 5.8    | 2.5    | 5.3    | 17.5   | 7.6    | 10.4   | 0.406840289 | 7.075    | 10.2     | 3.125   | 0.693627451 | 0.3474   | 1.55   |
| 102815_at   | 933.7  | 1226.2 | 1860.7 | 1745.5 | 1373.7 | 1080.8 | 1319.2 | 1356.9 | 0.529860122 | 1441.525 | 1282.65  | 158.875 | 1.123864655 | 0.64     | -1.088 |
| 102816_at   | 20.8   | 28.1   | 9.6    | 11     | 21.7   | 32     | 20.6   | 20.6   | 0.272631901 | 17.375   | 23.725   | 6.35    | 0.732349842 | 0.2097   | 1.477  |
| 102817_at   | 213.1  | 275    | 220.7  | 239.9  | 256.1  | 277.7  | 226.5  | 234.2  | 0.548899117 | 237.175  | 248.625  | 11.45   | 0.953946707 | 0.5282   | 1.05   |
| 102818_at   | 572.3  | 595.5  | 514.7  | 614.3  | 802    | 614.5  | 336.5  | 579.9  | 0.931951195 | 574.2    | 583.225  | 9.025   | 0.984525698 | 0.8835   | -1.029 |
| 102819_at   | 13.6   | 25.7   | 28.9   | 20.6   | 31.3   | 12.8   | 55.7   | 58.6   | 0.207941418 | 22.2     | 39.6     | 17.4    | 0.560606061 | 0.2853   | 1.582  |
| 102820_at   | 18.9   | 7.7    | 11.7   | 11.4   | 8.4    | 13     | 10.4   | 6.9    | 0.355788061 | 12.425   | 9.675    | 2.75    | 1.284237726 | 0.3603   | -1.254 |
| 102821_s_at | 9610.8 | 8901.8 | 7336.9 | 6466.3 | 7929.5 | 7499.5 | 7510.3 | 7795.2 | 0.622111559 | 8078.95  | 7683.625 | 395.325 | 1.051450325 | 0.689    | -1.039 |
| 102822_at   | 28     | 7      | 3.6    | 3.6    | 2      | 38.6   | 13     | 9.6    | 0.615661596 | 10.55    | 15.8     | 5.25    | 0.667721519 | 0.682    | 1.396  |
| 102823_at   | 9.1    | 8.5    | 7.2    | 4.2    | 5.8    | 7.4    | 4.1    | 3.8    | 0.203774955 | 7.25     | 5.275    | 1.975   | 1.374407583 | 0.2312   | -1.369 |
| 102824_g_at | 22.4   | 30.2   | 27.9   | 1.5    | 18.5   | 25.1   | 13     | 10.3   | 0.63055186  | 20.5     | 16.725   | 3.775   | 1.225710015 | 0.8079   | 1.207  |
| 102825_at   | 51.1   | 12.4   | 3.3    | 27.6   | 15.2   | 32.4   | 5.4    | 6.3    | 0.504094106 | 23.6     | 14.825   | 8.775   | 1.591905565 | 0.6887   | -1.357 |
| 102826_at   | 944.1  | 858.2  | 656.8  | 563.1  | 478.4  | 557.5  | 451    | 438.8  | 0.047345343 | 755.55   | 481.425  | 274.125 | 1.569403334 | 0.01588  | -1.544 |
| 102827_at   | 1287.7 | 970.3  | 1440.8 | 1104   | 1209.4 | 1370.5 | 1435.7 | 1657.1 | 0.168527663 | 1200.7   | 1418.175 | 217.475 | 0.846651506 | 0.165    | 1.187  |
| 102828_at   | 155.8  | 179.6  | 123.8  | 212.3  | 199.4  | 187.5  | 278.9  | 134.1  | 0.404152747 | 167.875  | 199.975  | 32.1    | 0.839479935 | 0.4268   | 1.174  |
| 102829_s_at | 128.9  | 114.8  | 139.5  | 114.1  | 93.5   | 121.8  | 161.1  | 113.6  | 0.911453324 | 124.325  | 122.5    | 1.825   | 1.014897959 | 0.8113   | -1.031 |
| 102830_at   | 10.9   | 4.1    | 4.8    | 6.8    | 5.1    | 9.9    | 5.8    | 6.6    | 0.918312508 | 6.65     | 6.85     | 0.2     | 0.97080292  | 0.7776   | 1.081  |
| 102831_s_at | 42.8   | 16.4   | 15.1   | 76.4   | 47.1   | 64.5   | 48.4   | 36.7   | 0.500052715 | 37.675   | 49.175   | 11.5    | 0.766141332 | 0.2888   | 1.608  |
| 102832_at   | 130.9  | 52.4   | 55.3   | 68.3   | 71.1   | 145.8  | 151.7  | 104.5  | 0.166261429 | 76.725   | 118.275  | 41.55   | 0.648700063 | 0.1437   | 1.586  |
| 102833_at   | 349.2  | 309.1  | 389.6  | 416.5  | 331.2  | 195.2  | 378.9  | 386    | 0.430728035 | 366.1    | 322.825  | 43.275  | 1.134050956 | 0.4063   | -1.167 |
| 102834_at   | 44     | 21.7   | 41.3   | 34.8   | 41.9   | 35     | 57.3   | 31.8   | 0.453661917 | 35.45    | 41.5     | 6.05    | 0.854216867 | 0.451    | 1.18   |
| 102835_at   | 637.8  | 493.8  | 565.2  | 596.1  | 511.1  | 565.5  | 456.5  | 553.3  | 0.236807944 | 573.225  | 521.6    | 51.625  | 1.09897431  | 0.246    | -1.098 |
| 102836_at   | 412    | 429.5  | 402.4  | 406    | 448.9  | 481.2  | 592.4  | 482.9  | 0.063381072 | 412.475  | 501.35   | 88.875  | 0.822728633 | 0.02161  | 1.209  |
| 102838_at   | 5.4    | 10.3   | 8.1    | 12.2   | 10     | 8.6    | 9.5    | 9.1    | 0.852715137 | 9        | 9.3      | 0.3     | 0.967741935 | 0.6837   | 1.08   |



|             |        |        |        |        |        |        |        |        |             |          |          |          |             |          |        |
|-------------|--------|--------|--------|--------|--------|--------|--------|--------|-------------|----------|----------|----------|-------------|----------|--------|
| 102839_at   | 283.6  | 256.6  | 316.5  | 250    | 277    | 297.1  | 345.1  | 260.5  | 0.472650334 | 276.675  | 294.925  | 18.25    | 0.938119861 | 0.4672   | 1.065  |
| 102840_at   | 52.6   | 75.4   | 99.1   | 68.3   | 109.2  | 27.7   | 84.3   | 84.8   | 0.899038536 | 73.85    | 76.5     | 2.65     | 0.965359477 | 0.8756   | -1.056 |
| 102841_at   | 319    | 293.8  | 214.4  | 271.8  | 244.6  | 326.1  | 236.7  | 222.4  | 0.611383526 | 274.75   | 257.45   | 17.3     | 1.067197514 | 0.6044   | -1.068 |
| 102843_s_at | 38.1   | 23.9   | 6.6    | 24.9   | 25.3   | 40.2   | 2.9    | 31     | 0.890283517 | 23.375   | 24.85    | 1.475    | 0.940643863 | 0.8664   | -1.134 |
| 102844_at   | 10.6   | 3      | 5.5    | 5.6    | 4.6    | 22.3   | 5.9    | 2.2    | 0.625627097 | 6.175    | 8.75     | 2.575    | 0.705714286 | 0.906    | 1.07   |
| 102845_at   | 479.9  | 694.1  | 610.6  | 575.6  | 357.8  | 473.4  | 424.9  | 406.4  | 0.02051694  | 590.05   | 415.625  | 174.425  | 1.419669173 | 0.01124  | -1.414 |
| 102846_at   | 17.7   | 17.8   | 44.3   | 10.5   | 15.5   | 19.6   | 34.7   | 47     | 0.546657413 | 22.575   | 29.2     | 6.625    | 0.773116438 | 0.4676   | 1.356  |
| 102847_s_at | 38.3   | 54.3   | 55.6   | 66.1   | 54.9   | 78.8   | 58.8   | 92.7   | 0.151968276 | 53.575   | 71.3     | 17.725   | 0.751402525 | 0.1441   | 1.326  |
| 102848_f_at | 2102.4 | 2385.7 | 2093.5 | 1814.1 | 2331.8 | 2398.2 | 2299.7 | 2184.7 | 0.179302067 | 2098.925 | 2303.6   | 204.675  | 0.911149939 | 0.1522   | 1.102  |
| 102849_at   | 62.7   | 126    | 105.4  | 192.3  | 98.5   | 98.1   | 122.4  | 135.8  | 0.79682578  | 121.6    | 113.7    | 7.9      | 1.069481091 | 0.9979   | 1.001  |
| 102850_at   | 419.9  | 500.9  | 478.4  | 613.4  | 352.6  | 240.2  | 263.6  | 344.6  | 0.008027073 | 503.15   | 300.25   | 202.9    | 1.675770192 | 0.005738 | -1.683 |
| 102851_s_at | 23.2   | 57.4   | 50.9   | 43.8   | 66.6   | 57.9   | 35.9   | 49.1   | 0.421192774 | 43.825   | 52.375   | 8.55     | 0.836754177 | 0.4258   | 1.229  |
| 102852_at   | 215.6  | 249.6  | 315.6  | 464.8  | 185.5  | 158.1  | 224    | 296.1  | 0.193467454 | 311.4    | 215.925  | 95.475   | 1.442167419 | 0.1547   | -1.419 |
| 102853_at   | 992.6  | 981.1  | 1040.1 | 984    | 1045.9 | 925.9  | 1268.5 | 1041.4 | 0.397784237 | 999.45   | 1070.425 | 70.975   | 0.933694561 | 0.3849   | 1.064  |
| 102854_s_at | 915    | 1022.3 | 943    | 969.6  | 954.5  | 871.6  | 1116.5 | 890.6  | 0.948000892 | 962.475  | 958.3    | 4.175    | 1.004356673 | 0.8951   | 1.008  |
| 102856_at   | 225.5  | 153.9  | 175.8  | 184.9  | 164.1  | 205.7  | 186.7  | 181    | 0.971481666 | 185.025  | 184.375  | 0.65     | 1.003525424 | 0.9782   | 1.003  |
| 102857_at   | 25.5   | 25.6   | 9.1    | 2.8    | 3.4    | 31     | 3.4    | 4.1    | 0.578582205 | 15.75    | 10.475   | 5.275    | 1.503579952 | 0.4534   | -1.83  |
| 102858_at   | 45.5   | 7.4    | 26     | 11     | 40.5   | 48.6   | 27.2   | 48.8   | 0.122046502 | 22.475   | 41.275   | 18.8     | 0.544518474 | 0.1057   | 2.283  |
| 102859_at   | 3783.3 | 2932.5 | 3426   | 4129.2 | 1640.6 | 1522.9 | 2093.3 | 2061.3 | 0.002347435 | 3567.75  | 1829.525 | 1738.225 | 1.950096336 | 0.000847 | -1.953 |
| 102860_at   | 482.1  | 467.5  | 360.6  | 359.9  | 391.8  | 484.3  | 318    | 378.3  | 0.627565843 | 417.525  | 393.1    | 24.425   | 1.062134317 | 0.6169   | -1.064 |
| 102861_at   | 208.6  | 142.7  | 111.7  | 135.5  | 143.2  | 244    | 123.6  | 189.8  | 0.481794276 | 149.625  | 175.15   | 25.525   | 0.85426777  | 0.482    | 1.161  |
| 102862_at   | 200.3  | 135.4  | 211.9  | 205.9  | 181.8  | 209.9  | 242.7  | 171.4  | 0.604719439 | 188.375  | 201.45   | 13.075   | 0.935095557 | 0.5956   | 1.076  |
| 102863_at   | 1049.2 | 1086.1 | 1075.2 | 930.5  | 1004.9 | 1029   | 1071.1 | 916.3  | 0.559631844 | 1035.25  | 1005.325 | 29.925   | 1.029766493 | 0.5723   | -1.029 |
| 102864_at   | 16.8   | 20.7   | 11.5   | 17.1   | 13.4   | 17.2   | 20.3   | 17.9   | 0.786406074 | 16.525   | 17.2     | 0.675    | 0.960755814 | 0.7514   | 1.051  |
| 102865_at   | 85.1   | 52.7   | 92.6   | 132.1  | 38.1   | 48.8   | 181    | 116    | 0.891359199 | 90.625   | 95.975   | 5.35     | 0.944256317 | 0.8426   | -1.089 |
| 102866_at   | 361.6  | 279.3  | 267.3  | 262.4  | 253.7  | 394.4  | 247.7  | 283.4  | 0.960370274 | 292.65   | 294.8    | 2.15     | 0.99270692  | 0.9875   | 1.002  |
| 102867_at   | 195    | 116.9  | 111.5  | 97     | 96.1   | 179.1  | 92.6   | 73.8   | 0.562684263 | 130.1    | 110.4    | 19.7     | 1.178442029 | 0.4772   | -1.203 |
| 102868_g_at | 23.1   | 36.3   | 34.3   | 13.3   | 14.6   | 13.6   | 9.8    | 23.3   | 0.123144539 | 26.75    | 15.325   | 11.425   | 1.745513866 | 0.1171   | -1.706 |
| 102869_at   | 194.3  | 169.8  | 194.7  | 250    | 151.6  | 194.1  | 208.1  | 177.6  | 0.39293949  | 202.2    | 182.85   | 19.35    | 1.105824446 | 0.3915   | -1.103 |
| 102870_at   | 815.7  | 686    | 539.9  | 1031.9 | 803.4  | 641.3  | 932.1  | 1282.4 | 0.428335471 | 768.375  | 914.8    | 146.425  | 0.839937691 | 0.4266   | 1.186  |
| 102871_at   | 262.4  | 277.2  | 310.1  | 390.1  | 361.6  | 420.2  | 337    | 361.7  | 0.132736109 | 309.95   | 370.125  | 60.175   | 0.837419791 | 0.1103   | 1.205  |
| 102872_f_at | 180.9  | 221.1  | 219.7  | 256.5  | 264.7  | 196.6  | 177    | 230    | 0.923603427 | 219.55   | 217.075  | 2.475    | 1.011401589 | 0.8957   | 1.016  |
| 102873_at   | 43.5   | 57.5   | 72.5   | 79.5   | 64     | 45.9   | 74.6   | 40.5   | 0.557440851 | 63.25    | 56.25    | 7        | 1.124444444 | 0.5575   | -1.129 |
| 102874_at   | 46.5   | 27.4   | 46.7   | 37.1   | 31.7   | 42.8   | 35     | 32.5   | 0.490101144 | 39.425   | 35.5     | 3.925    | 1.11056338  | 0.5563   | -1.093 |
| 102875_at   | 169.1  | 178.1  | 234.6  | 227.3  | 266.5  | 176.5  | 305.2  | 213.7  | 0.300182564 | 202.275  | 240.475  | 38.2     | 0.841147728 | 0.312    | 1.176  |
| 102876_at   | 64.3   | 37     | 21.1   | 53.7   | 45.7   | 79.8   | 25.8   | 46     | 0.730766118 | 44.025   | 49.325   | 5.3      | 0.892549417 | 0.7387   | 1.125  |
| 102877_at   | 31.7   | 62.6   | 7.8    | 7.8    | 54.2   | 42.7   | 27.9   | 53.8   | 0.294425518 | 27.475   | 44.65    | 17.175   | 0.615341545 | 0.1739   | 2.314  |
| 102878_at   | 276.4  | 225.8  | 263.2  | 256.5  | 268.4  | 332.5  | 334.5  | 239.5  | 0.212626314 | 255.475  | 293.725  | 38.25    | 0.869776151 | 0.2056   | 1.141  |
| 102879_s_at | 188.4  | 174.1  | 147.5  | 98.4   | 149.5  | 254    | 178.9  | 178.8  | 0.248511867 | 152.1    | 190.3    | 38.2     | 0.799264319 | 0.2463   | 1.264  |
| 102880_at   | 110.4  | 178.4  | 77.5   | 43.1   | 129.2  | 184.7  | 166.2  | 78.8   | 0.354297227 | 102.35   | 139.725  | 37.375   | 0.732510288 | 0.3134   | 1.476  |
| 102881_at   | 281.2  | 186.1  | 243.7  | 203.8  | 167.3  | 320.1  | 177.8  | 246.1  | 0.983915167 | 228.7    | 227.825  | 0.875    | 1.003840667 | 0.8885   | -1.026 |
| 102882_at   | 22.2   | 18.1   | 16     | 6.9    | 15.2   | 17.4   | 15.3   | 15.8   | 0.971835104 | 15.8     | 15.925   | 0.125    | 0.992150706 | 0.7312   | 1.097  |
| 102883_at   | 316.8  | 344.6  | 492.5  | 516    | 382.9  | 351.6  | 344.4  | 429    | 0.49784994  | 417.475  | 376.975  | 40.5     | 1.10743418  | 0.5553   | -1.087 |
| 102884_at   | 9.5    | 18     | 21.6   | 19.4   | 39.8   | 16.7   | 44.1   | 23.1   | 0.123584043 | 17.125   | 30.925   | 13.8     | 0.553759095 | 0.1051   | 1.756  |
| 102885_at   | 150.6  | 232.8  | 186.9  | 248.8  | 212.2  | 263.4  | 218.7  | 303.3  | 0.198031342 | 204.775  | 249.4    | 44.625   | 0.821070569 | 0.1964   | 1.228  |
| 102886_at   | 328.8  | 390.8  | 565.9  | 612.7  | 375.3  | 279.7  | 380.1  | 470    | 0.26815292  | 474.55   | 376.275  | 98.275   | 1.261178659 | 0.2812   | -1.242 |
| 102887_at   | 234.7  | 256.8  | 272.3  | 275.8  | 162.8  | 179.2  | 230.6  | 166.4  | 0.00963802  | 259.9    | 184.75   | 75.15    | 1.4067659   | 0.007392 | -1.418 |
| 102888_s_at | 273.8  | 310.7  | 303.1  | 352.8  | 277.7  | 319    | 242.9  | 217.4  | 0.149702801 | 310.1    | 264.25   | 45.85    | 1.173509934 | 0.1406   | -1.181 |
| 102889_r_at | 822.7  | 877.7  | 974.6  | 851.1  | 767    | 812.9  | 772.7  | 660.7  | 0.032546889 | 881.525  | 753.325  | 128.2    | 1.170178874 | 0.03384  | -1.171 |
| 102890_at   | 457    | 563.4  | 508.4  | 540.4  | 584.1  | 563.8  | 455.3  | 430.2  | 0.849739172 | 517.3    | 508.35   | 8.95     | 1.01760598  | 0.8027   | 1.023  |
| 102891_at   | 338.6  | 312.9  | 316    | 316.5  | 269.7  | 329.3  | 380.9  | 350.3  | 0.66249509  | 321      | 332.55   | 11.55    | 0.965268381 | 0.7246   | 1.028  |
| 102892_at   | 67.7   | 56.9   | 39.8   | 61     | 39.3   | 69.7   | 36     | 47.6   | 0.429417147 | 56.35    | 48.15    | 8.2      | 1.170301142 | 0.3931   | -1.187 |
| 102893_at   | 407.9  | 291.7  | 377.6  | 490.9  | 235.5  | 304.3  | 339.9  | 413.3  | 0.260781731 | 392.025  | 323.25   | 68.775   | 1.212761021 | 0.2648   | -1.217 |
| 102894_g_at | 445.1  | 449.3  | 544.2  | 794.2  | 477.7  | 404.8  | 650    | 678.8  | 0.961067639 | 558.2    | 552.825  | 5.375    | 1.009722788 | 0.9862   | 1.003  |
| 102895_at   | 413.7  | 379.2  | 349.5  | 471.9  | 435.4  | 331.5  | 451.8  | 578.7  | 0.462833217 | 403.575  | 449.35   | 45.775   | 0.898130633 | 0.4981   | 1.099  |
| 102896_at   | 159.9  | 161    | 203.3  | 170.5  | 130.6  | 159.8  | 173.2  | 181.9  | 0.447728583 | 173.675  | 161.375  | 12.3     | 1.076219985 | 0.4379   | -1.079 |



|             |        |        |        |        |        |        |        |        |             |          |         |         |             |          |        |
|-------------|--------|--------|--------|--------|--------|--------|--------|--------|-------------|----------|---------|---------|-------------|----------|--------|
| 102898_at   | 15.3   | 11.9   | 7.1    | 15.4   | 7.4    | 19.9   | 14.8   | 10.8   | 0.818570084 | 12.425   | 13.225  | 0.8     | 0.939508507 | 0.8898   | 1.041  |
| 102899_at   | 74.2   | 42.3   | 34.1   | 67     | 45.2   | 75.1   | 41.4   | 55.6   | 0.995314064 | 54.4     | 54.325  | 0.075   | 1.00138058  | 0.9278   | 1.022  |
| 102900_at   | 4.5    | 8.2    | 9.9    | 10.7   | 15.6   | 3.8    | 14.3   | 2.6    | 0.848515413 | 8.325    | 9.075   | 0.75    | 0.917355372 | 0.7867   | -1.151 |
| 102901_at   | 12.9   | 11.9   | 5.9    | 7.3    | 4.1    | 11     | 4.6    | 5.7    | 0.225847867 | 9.5      | 6.35    | 3.15    | 1.496062992 | 0.1914   | -1.534 |
| 102902_at   | 43.9   | 56.6   | 35.9   | 41.8   | 21.7   | 34.1   | 70.1   | 18.6   | 0.54175898  | 44.55    | 36.125  | 8.425   | 1.233217993 | 0.3194   | -1.404 |
| 102904_at   | 18     | 54     | 31.1   | 46.3   | 140    | 89.7   | 216.7  | 37.4   | 0.114168745 | 37.35    | 120.95  | 83.6    | 0.308805291 | 0.05397  | 2.919  |
| 102905_at   | 37.8   | 50     | 41     | 40.2   | 49.5   | 54.4   | 46.5   | 34.1   | 0.480400456 | 42.25    | 46.125  | 3.875   | 0.91598916  | 0.5261   | 1.083  |
| 102906_at   | 11.7   | 10.5   | 10.4   | 4.1    | 25.9   | 62.1   | 27.3   | 21.8   | 0.07247292  | 9.175    | 34.275  | 25.1    | 0.267687819 | 0.00843  | 3.682  |
| 102907_at   | 1277   | 1427.5 | 1471.9 | 1525   | 1567.8 | 1082.3 | 1652   | 1628.5 | 0.71290331  | 1425.35  | 1482.65 | 57.3    | 0.961352983 | 0.8084   | 1.028  |
| 102908_at   | 36.4   | 37.5   | 3.7    | 27     | 7.6    | 53     | 38.6   | 24.9   | 0.709848406 | 26.15    | 31.025  | 4.875   | 0.842868654 | 0.7234   | 1.295  |
| 102910_at   | 19.4   | 6      | 33.6   | 12.7   | 37.5   | 21.7   | 20.4   | 43.9   | 0.169324409 | 17.925   | 30.875  | 12.95   | 0.580566802 | 0.1535   | 1.956  |
| 102911_at   | 476.4  | 464.8  | 488.1  | 546    | 464.5  | 520.8  | 405.8  | 433.7  | 0.267989908 | 493.825  | 456.2   | 37.625  | 1.082474792 | 0.2498   | -1.085 |
| 102912_at   | 786.9  | 817.9  | 992.6  | 875.3  | 949    | 802.8  | 796.5  | 985.7  | 0.826107463 | 868.175  | 883.5   | 15.325  | 0.982654216 | 0.8306   | 1.017  |
| 102913_at   | 2.6    | 16.3   | 0.5    | 0.8    | 0.6    | 6      | 0.9    | 0.9    | 0.504470565 | 5.05     | 2.1     | 2.95    | 2.404761905 | 0.6285   | -1.601 |
| 102914_s_at | 84.3   | 120    | 147.2  | 125.9  | 140    | 165.5  | 176.3  | 130.8  | 0.093646659 | 119.35   | 153.15  | 33.8    | 0.779301339 | 0.1044   | 1.299  |
| 102915_at   | 215.8  | 192.4  | 189.5  | 171.1  | 276.5  | 406.8  | 139.2  | 199.3  | 0.355120281 | 192.2    | 255.45  | 63.25   | 0.752397729 | 0.4035   | 1.234  |
| 102916_s_at | 131.5  | 147.5  | 169.1  | 365    | 202.7  | 143.5  | 302.1  | 334    | 0.568899743 | 203.275  | 245.575 | 42.3    | 0.827751196 | 0.4849   | 1.251  |
| 102917_at   | 96     | 69.1   | 77.1   | 123.8  | 81.8   | 124.3  | 118.2  | 113.2  | 0.292536571 | 91.5     | 109.375 | 17.875  | 0.836571429 | 0.2766   | 1.211  |
| 102918_at   | 137.3  | 159.6  | 119.7  | 38.1   | 144.8  | 131.9  | 82.9   | 144.7  | 0.700295332 | 113.675  | 126.075 | 12.4    | 0.901645846 | 0.5776   | 1.231  |
| 102919_at   | 387.9  | 363.9  | 362.5  | 397.2  | 286.7  | 349.7  | 305.6  | 330.5  | 0.014363848 | 377.875  | 318.125 | 59.75   | 1.187819253 | 0.0123   | -1.19  |
| 102920_at   | 66.1   | 72     | 50.9   | 79.5   | 70.4   | 92.8   | 64     | 68.5   | 0.471061    | 67.125   | 73.925  | 6.8     | 0.90801488  | 0.46     | 1.104  |
| 102921_s_at | 2.3    | 16.8   | 6.1    | 2.5    | 17.3   | 3      | 4.9    | 15     | 0.550130155 | 6.925    | 10.05   | 3.125   | 0.689054726 | 0.4832   | 1.606  |
| 102922_at   | 102.2  | 96     | 118.4  | 138.5  | 102.9  | 118.3  | 115.9  | 126.9  | 0.844552169 | 113.775  | 116     | 2.225   | 0.980818966 | 0.7828   | 1.027  |
| 102923_at   | 9.6    | 9.5    | 6.4    | 6.5    | 6.1    | 10.5   | 7.2    | 7.2    | 0.854678559 | 8        | 7.75    | 0.25    | 1.032258065 | 0.8274   | -1.037 |
| 102924_at   | 641.9  | 463.3  | 732    | 764.8  | 383.6  | 371.4  | 411.8  | 383.1  | 0.029031096 | 650.5    | 387.475 | 263.025 | 1.678817988 | 0.004902 | -1.65  |
| 102925_at   | 73.6   | 50     | 103.3  | 133    | 127.9  | 129.1  | 107.4  | 113.2  | 0.201915686 | 89.975   | 119.4   | 29.425  | 0.753559464 | 0.1634   | 1.412  |
| 102926_at   | 121.1  | 107    | 115.9  | 109.6  | 121.7  | 191.2  | 73.7   | 114.1  | 0.663965384 | 113.4    | 125.175 | 11.775  | 0.905931696 | 0.8348   | 1.044  |
| 102927_s_at | 372.7  | 320.2  | 305.5  | 390.5  | 323.2  | 327.1  | 302.4  | 322.6  | 0.260873173 | 347.225  | 318.825 | 28.4    | 1.08907708  | 0.2385   | -1.084 |
| 102928_at   | 1169.6 | 1065.2 | 975.9  | 1086.2 | 1143.2 | 1143.6 | 1045.9 | 1113.9 | 0.453814534 | 1074.225 | 1111.65 | 37.425  | 0.966333828 | 0.4362   | 1.036  |
| 102929_s_at | 13.8   | 13.6   | 11.5   | 8.9    | 10     | 13.5   | 21.1   | 11.5   | 0.485347213 | 11.95    | 14.025  | 2.075   | 0.852049911 | 0.5198   | 1.139  |
| 102930_at   | 63.4   | 114.6  | 92.4   | 106.2  | 118.6  | 111.8  | 114.8  | 117    | 0.152048862 | 94.15    | 115.55  | 21.4    | 0.814798788 | 0.134    | 1.257  |
| 102931_at   | 27.5   | 21.4   | 18.3   | 30.5   | 23.7   | 29.8   | 23.3   | 21.4   | 0.97143439  | 24.425   | 24.55   | 0.125   | 0.99490835  | 0.9025   | -1.017 |
| 102932_at   | 20.4   | 30.8   | 25.4   | 32.6   | 6.9    | 20.3   | 34     | 21.2   | 0.334465531 | 27.3     | 20.6    | 6.7     | 1.325242718 | 0.2905   | -1.506 |
| 102933_at   | 294.2  | 247.5  | 315.4  | 266.5  | 195.2  | 340.2  | 230.3  | 298.3  | 0.698969078 | 280.9    | 266     | 14.9    | 1.056015038 | 0.6085   | -1.076 |
| 102934_s_at | 617.1  | 403.6  | 358.7  | 538.5  | 395    | 637.4  | 463.9  | 495.6  | 0.821749996 | 479.475  | 497.975 | 18.5    | 0.962849541 | 0.7825   | 1.047  |
| 102935_at   | 277.3  | 280.6  | 268.3  | 248.1  | 306.1  | 259.9  | 268.2  | 234.1  | 0.931960883 | 268.575  | 267.075 | 1.5     | 1.0056164   | 0.8874   | 1.009  |
| 102936_at   | 57.9   | 131.2  | 137    | 126.7  | 128.4  | 125.8  | 123.7  | 128.5  | 0.522731377 | 113.2    | 126.6   | 13.4    | 0.894154818 | 0.4495   | 1.181  |
| 102937_at   | 190.4  | 157.3  | 218.6  | 292.7  | 138.8  | 167.7  | 234.8  | 263.5  | 0.751311725 | 214.75   | 201.2   | 13.55   | 1.067345924 | 0.7301   | -1.074 |
| 102938_at   | 123.2  | 41.9   | 55.7   | 24.6   | 48.4   | 24.7   | 22.8   | 22     | 0.238599274 | 61.35    | 29.475  | 31.875  | 2.081424936 | 0.1599   | -1.852 |
| 102939_s_at | 27     | 17     | 11.7   | 22.1   | 45.7   | 21.2   | 18.8   | 13.4   | 0.534651212 | 19.45    | 24.775  | 5.325   | 0.78506559  | 0.5888   | 1.198  |
| 102940_at   | 121.3  | 129.5  | 173.6  | 187.7  | 165.2  | 128.5  | 124.7  | 170.7  | 0.786735769 | 153.025  | 147.275 | 5.75    | 1.039042607 | 0.8263   | -1.031 |
| 102941_at   | 73.3   | 83.3   | 83.1   | 84.9   | 54.1   | 68     | 108.8  | 83.6   | 0.845909317 | 81.15    | 78.625  | 2.525   | 1.032114467 | 0.6947   | -1.065 |
| 102942_at   | 124.5  | 104.3  | 136.3  | 203.9  | 162    | 139.6  | 137.9  | 129.6  | 0.999178303 | 142.25   | 142.275 | 0.025   | 0.999824284 | 0.8565   | 1.029  |
| 102943_at   | 186.7  | 169.3  | 186.5  | 118.1  | 118.8  | 114.6  | 149    | 168.1  | 0.232587424 | 165.15   | 137.625 | 27.525  | 1.2         | 0.2554   | -1.196 |
| 102944_at   | 448.4  | 480.9  | 564.3  | 540.4  | 435.9  | 540.3  | 502.6  | 497.7  | 0.690269444 | 508.5    | 494.125 | 14.375  | 1.029091829 | 0.7046   | -1.028 |
| 102946_r_at | 86.1   | 90.7   | 60.9   | 72.1   | 78.6   | 86.4   | 47.4   | 42.4   | 0.336684616 | 77.45    | 63.7    | 13.75   | 1.215855573 | 0.2929   | -1.259 |
| 102947_at   | 52.6   | 79.9   | 59.3   | 95.1   | 97     | 96.2   | 97.7   | 73.2   | 0.151425095 | 71.725   | 91.025  | 19.3    | 0.787970338 | 0.1413   | 1.295  |
| 102948_at   | 134    | 145.4  | 104.9  | 148.4  | 158.8  | 124.6  | 52.4   | 103.3  | 0.389909641 | 133.175  | 109.775 | 23.4    | 1.213163289 | 0.3399   | -1.297 |
| 102949_g_at | 353.7  | 430.4  | 294.6  | 437.9  | 349.9  | 332.8  | 156.4  | 213.3  | 0.09609215  | 379.15   | 263.1   | 116.05  | 1.441087039 | 0.106    | -1.5   |
| 102950_at   | 34.1   | 13.8   | 12.4   | 15.7   | 14.3   | 33.7   | 6.7    | 20     | 0.967446247 | 19       | 18.675  | 0.325   | 1.017402945 | 0.8382   | -1.091 |
| 102951_at   | 222.3  | 218    | 203.5  | 213.3  | 268.9  | 274.2  | 277.2  | 216.2  | 0.04807315  | 214.275  | 259.125 | 44.85   | 0.826917511 | 0.02429  | 1.204  |
| 102952_g_at | 459.9  | 551.6  | 392.7  | 443.7  | 629.7  | 663.2  | 383.9  | 419.7  | 0.471279262 | 461.975  | 524.125 | 62.15   | 0.881421417 | 0.5251   | 1.111  |
| 102953_at   | 92.3   | 171.9  | 148.5  | 105.9  | 61.4   | 114.8  | 121.5  | 180.5  | 0.753208708 | 129.65   | 119.55  | 10.1    | 1.08448348  | 0.6688   | -1.127 |
| 102954_at   | 35.3   | 27.1   | 25.8   | 30     | 16.1   | 16.4   | 18.6   | 27.8   | 0.031920884 | 29.55    | 19.725  | 9.825   | 1.498098859 | 0.02687  | -1.525 |
| 102955_at   | 134.9  | 103.5  | 175    | 173.7  | 156.8  | 113.8  | 120.5  | 159.1  | 0.675776102 | 146.775  | 137.55  | 9.225   | 1.067066521 | 0.735    | -1.055 |
| 102956_at   | 5.7    | 11.5   | 8.4    | 12     | 11.8   | 10.5   | 3.8    | 13.5   | 0.853611645 | 9.4      | 9.9     | 0.5     | 0.949494949 | 0.9736   | -1.012 |



|             |        |        |        |        |        |        |        |        |             |         |          |        |             |          |        |
|-------------|--------|--------|--------|--------|--------|--------|--------|--------|-------------|---------|----------|--------|-------------|----------|--------|
| 102957_at   | 64.1   | 58     | 54     | 44.3   | 64     | 57.1   | 75.6   | 56.9   | 0.218935198 | 55.1    | 63.4     | 8.3    | 0.869085174 | 0.2153   | 1.153  |
| 102958_at   | 122.9  | 77.3   | 77.7   | 110    | 81     | 105.2  | 102.6  | 86.8   | 0.823140929 | 96.975  | 93.9     | 3.075  | 1.032747604 | 0.906    | 1.017  |
| 102959_at   | 121.8  | 111    | 232.8  | 226.4  | 171    | 144.8  | 176.5  | 170.4  | 0.839998084 | 173     | 165.675  | 7.325  | 1.044213068 | 0.9569   | 1.011  |
| 102960_at   | 685.6  | 898.2  | 824.8  | 742.7  | 940.1  | 756    | 841.7  | 856.2  | 0.351965462 | 787.825 | 848.5    | 60.675 | 0.928491456 | 0.3419   | 1.079  |
| 102961_at   | 7.5    | 16.5   | 4.7    | 3.4    | 5.9    | 5.4    | 2.4    | 12.5   | 0.700652379 | 8.025   | 6.55     | 1.475  | 1.22519084  | 0.7138   | -1.203 |
| 102962_at   | 51.6   | 63.2   | 88.2   | 24.2   | 59.1   | 99.6   | 69     | 30.9   | 0.700163136 | 56.8    | 64.65    | 7.85   | 0.878576953 | 0.7031   | 1.158  |
| 102963_at   | 172.6  | 180    | 208.3  | 195.6  | 110.7  | 140.6  | 170.7  | 131.6  | 0.018037791 | 189.125 | 138.4    | 50.725 | 1.366510116 | 0.0175   | -1.379 |
| 102964_at   | 780.2  | 903.4  | 805.7  | 746.2  | 946.1  | 708.9  | 778.3  | 781.7  | 0.935750333 | 808.875 | 803.75   | 5.125  | 1.006376361 | 0.9014   | 1.009  |
| 102965_at   | 122.2  | 132.4  | 177.9  | 265.3  | 135.3  | 102.1  | 183.6  | 192.3  | 0.60966911  | 174.45  | 153.325  | 21.125 | 1.137779227 | 0.6417   | -1.119 |
| 102966_at   | 96.5   | 125.2  | 149.5  | 216.4  | 172.4  | 120.7  | 185.7  | 203.3  | 0.480162622 | 146.9   | 170.525  | 23.625 | 0.861457264 | 0.426    | 1.191  |
| 102967_at   | 28.1   | 5      | 30.3   | 42.3   | 53.8   | 65.6   | 17.1   | 58.2   | 0.150798185 | 26.425  | 48.675   | 22.25  | 0.542886492 | 0.2419   | 2.108  |
| 102968_at   | 221.3  | 304.8  | 191.8  | 223.3  | 336.6  | 303    | 299.7  | 246.5  | 0.095667724 | 235.3   | 296.45   | 61.15  | 0.793725755 | 0.08701  | 1.271  |
| 102969_at   | 278.3  | 244.1  | 264.5  | 361.1  | 367.2  | 217.7  | 224.7  | 261.1  | 0.67028854  | 287     | 267.675  | 19.325 | 1.07219576  | 0.5996   | -1.085 |
| 102970_at   | 137.7  | 149.8  | 162.2  | 219.7  | 202.6  | 138.5  | 179    | 195.6  | 0.635686383 | 167.35  | 178.925  | 11.575 | 0.93530809  | 0.6055   | 1.075  |
| 102971_at   | 30.8   | 22     | 16.5   | 23.3   | 21.1   | 33.7   | 23.2   | 29.1   | 0.411451633 | 23.15   | 26.775   | 3.625  | 0.864612512 | 0.3932   | 1.166  |
| 102972_s_at | 99.6   | 86.2   | 42.8   | 107.4  | 56.6   | 116.9  | 63.3   | 80     | 0.816066066 | 84      | 79.2     | 4.8    | 1.060606061 | 0.8822   | -1.042 |
| 102973_f_at | 10     | 21     | 18.6   | 14.1   | 18.8   | 26     | 5.1    | 25.7   | 0.612609991 | 15.925  | 18.9     | 2.975  | 0.842592593 | 0.9314   | 1.039  |
| 102974_at   | 11.1   | 5.9    | 4.8    | 7      | 6.1    | 9.5    | 5.4    | 7.3    | 0.942208831 | 7.2     | 7.075    | 0.125  | 1.017667845 | 0.977    | 1.007  |
| 102975_at   | 5.2    | 8      | 5.5    | 3.1    | 6.1    | 4.8    | 2.4    | 8.2    | 0.963624381 | 5.45    | 5.375    | 0.075  | 1.013953488 | 0.8856   | -1.05  |
| 102976_at   | 331.7  | 273.5  | 426    | 390.3  | 337.8  | 339.4  | 367.2  | 344.1  | 0.823781533 | 355.375 | 347.125  | 8.25   | 1.023766655 | 0.922    | 1.01   |
| 102977_at   | 27     | 34.8   | 21.7   | 13.7   | 23.5   | 46.8   | 20.6   | 25.8   | 0.538594908 | 24.3    | 29.175   | 4.875  | 0.832904884 | 0.5177   | 1.202  |
| 102978_at   | 272    | 51.1   | 77.5   | 120.8  | 50.9   | 144.1  | 75.5   | 70.5   | 0.445825278 | 130.35  | 85.25    | 45.1   | 1.529032258 | 0.4995   | -1.351 |
| 102979_at   | 58     | 90.2   | 74.3   | 92.1   | 76.7   | 83.5   | 77     | 89.4   | 0.742930591 | 78.65   | 81.65    | 3      | 0.963257808 | 0.663    | 1.053  |
| 102980_at   | 274.9  | 236.1  | 339    | 368.7  | 230.4  | 288    | 298.5  | 304    | 0.512276192 | 304.675 | 280.225  | 24.45  | 1.087251316 | 0.5565   | -1.077 |
| 102981_at   | 97     | 78.4   | 138.6  | 137.3  | 52     | 68.4   | 139.9  | 132.1  | 0.604997357 | 112.825 | 98.1     | 14.725 | 1.150101937 | 0.5097   | -1.218 |
| 102982_at   | 1030.7 | 951.9  | 989.1  | 1004.4 | 914.8  | 1022.7 | 1021   | 839.4  | 0.403715821 | 994.025 | 949.475  | 44.55  | 1.046920667 | 0.3714   | -1.05  |
| 102983_at   | 292    | 357.1  | 453.8  | 589.6  | 437    | 402.2  | 570.7  | 594.6  | 0.372817564 | 423.125 | 501.125  | 78     | 0.844350212 | 0.3321   | 1.209  |
| 102984_g_at | 566.9  | 664.5  | 893.5  | 898.9  | 755.6  | 617.3  | 841.7  | 954.6  | 0.751748767 | 755.95  | 792.3    | 36.35  | 0.954120914 | 0.7281   | 1.055  |
| 102985_at   | 449.5  | 496.4  | 510.1  | 452.2  | 475.4  | 483.2  | 477.8  | 419.4  | 0.563813016 | 477.05  | 463.95   | 13.1   | 1.028235801 | 0.5693   | 1.028  |
| 102986_at   | 154.6  | 114.8  | 136.7  | 152.3  | 134.5  | 191.6  | 154.9  | 153.9  | 0.253575786 | 139.6   | 158.725  | 19.125 | 0.879508584 | 0.2517   | 1.136  |
| 102987_at   | 57.5   | 39.8   | 10.8   | 35.9   | 42.3   | 53.1   | 7.7    | 42.2   | 0.981965182 | 36      | 36.325   | 0.325  | 0.991052994 | 0.9364   | -1.049 |
| 102988_at   | 862.3  | 688.3  | 720.2  | 960.8  | 518.8  | 929.2  | 688.2  | 857.7  | 0.61564494  | 807.9   | 748.475  | 59.425 | 1.079394769 | 0.5683   | -1.096 |
| 102989_at   | 11.9   | 12.2   | 12.3   | 10.2   | 10.1   | 14.2   | 9      | 8.6    | 0.441741226 | 11.65   | 10.475   | 1.175  | 1.112171838 | 0.3508   | -1.132 |
| 102990_at   | 1464.6 | 1930.7 | 2373   | 2747.3 | 1821.1 | 1803.6 | 3355.1 | 3195.2 | 0.44861285  | 2128.9  | 2543.75  | 414.85 | 0.836914005 | 0.4876   | 1.176  |
| 102991_s_at | 349.9  | 357.7  | 357.3  | 341.8  | 441.8  | 464.2  | 376.8  | 420.3  | 0.025959488 | 351.675 | 425.775  | 74.1   | 0.825964418 | 0.006337 | 1.207  |
| 102992_at   | 48.5   | 10.6   | 35.9   | 41.6   | 46.5   | 69.5   | 15.9   | 62.5   | 0.36193245  | 34.15   | 48.6     | 14.45  | 0.702674897 | 0.4882   | 1.431  |
| 102993_at   | 507.6  | 502    | 352.9  | 363.9  | 419.3  | 724    | 440.8  | 473.4  | 0.362358285 | 431.6   | 514.375  | 82.775 | 0.839076549 | 0.34     | 1.18   |
| 102994_at   | 9      | 67.3   | 24.2   | 14.2   | 47.9   | 32.7   | 34.2   | 43.9   | 0.47530275  | 28.675  | 39.675   | 11     | 0.722747322 | 0.2206   | 1.829  |
| 102995_s_at | 45.2   | 27.9   | 24.9   | 44     | 30.6   | 67.2   | 38.4   | 31.3   | 0.556478645 | 35.5    | 41.875   | 6.375  | 0.847761194 | 0.566    | 1.156  |
| 102996_at   | 319.4  | 317.7  | 369.3  | 415.8  | 344.5  | 287    | 290.2  | 382.6  | 0.403425838 | 355.55  | 326.075  | 29.475 | 1.090393314 | 0.3912   | -1.092 |
| 102998_at   | 24.4   | 20     | 14.5   | 18.1   | 19.6   | 25.2   | 68.6   | 19     | 0.330902714 | 19.25   | 33.1     | 13.85  | 0.581570997 | 0.2552   | 1.496  |
| 103001_at   | 480.9  | 377.6  | 551.8  | 514.3  | 451    | 478.5  | 390.3  | 389.1  | 0.27222825  | 481.15  | 427.225  | 53.925 | 1.126221546 | 0.2901   | -1.12  |
| 103002_at   | 1468.6 | 1377.2 | 1293.9 | 1765.7 | 1658.4 | 1439.9 | 1433.1 | 1770.1 | 0.483893124 | 1476.35 | 1575.375 | 99.025 | 0.93714195  | 0.4578   | 1.07   |
| 103003_i_at | 0.4    | 1.8    | 0.7    | 2.3    | 0.7    | 2.7    | 15.4   | 9.1    | 0.186707901 | 1.3     | 6.975    | 5.675  | 0.186379928 | 0.1345   | 3.956  |
| 103004_r_at | 21.5   | 2.8    | 3.4    | 3.8    | 16.8   | 4.2    | 14.1   | 4      | 0.748322378 | 7.875   | 9.775    | 1.9    | 0.805626598 | 0.531    | 1.498  |
| 103005_s_at | 71.7   | 72.4   | 55.8   | 64.7   | 35.4   | 62.2   | 85.6   | 69.7   | 0.806984426 | 66.15   | 63.225   | 2.925  | 1.046263345 | 0.6717   | -1.092 |
| 103006_at   | 278.9  | 297.9  | 319.4  | 309    | 231.1  | 309    | 283.3  | 232.9  | 0.149729974 | 301.3   | 264.075  | 37.225 | 1.140963741 | 0.1265   | -1.148 |
| 103007_at   | 28.8   | 113    | 85.6   | 54     | 102    | 71.1   | 89.2   | 124    | 0.276916063 | 70.35   | 96.575   | 26.225 | 0.728449392 | 0.2403   | 1.519  |
| 103009_at   | 205.9  | 212.3  | 259.5  | 279.9  | 180.6  | 248.7  | 241.3  | 305.1  | 0.889950012 | 239.4   | 243.925  | 4.525  | 0.981449216 | 0.9411   | 1.01   |
| 103010_at   | 298.8  | 267.9  | 321.6  | 305.2  | 359.2  | 426.4  | 284.9  | 321.5  | 0.201952134 | 298.375 | 348      | 49.625 | 0.857399425 | 0.1738   | 1.156  |
| 103011_at   | 1681.5 | 1354.3 | 1570   | 1597.2 | 1413.6 | 1413.4 | 1394.5 | 1494.5 | 0.178974745 | 1550.75 | 1429     | 121.75 | 1.08519944  | 0.1578   | -1.082 |
| 103012_at   | 1143.3 | 1326.7 | 983.7  | 1172.3 | 941.4  | 953.9  | 925.7  | 984.4  | 0.059334011 | 1156.5  | 951.35   | 205.15 | 1.215640931 | 0.02319  | -1.209 |
| 103013_at   | 498.3  | 306.1  | 357.1  | 459.9  | 411.3  | 676.6  | 360.5  | 451.6  | 0.437604081 | 405.35  | 475      | 69.65  | 0.853368421 | 0.4329   | 1.16   |
| 103015_at   | 70     | 92.9   | 123    | 114.1  | 162.5  | 130.6  | 93.8   | 144.5  | 0.132570208 | 100     | 132.85   | 32.85  | 0.752728641 | 0.1481   | 1.332  |
| 103016_s_at | 344.2  | 313.7  | 341    | 233.6  | 271.2  | 382.4  | 305.5  | 259    | 0.927390407 | 308.125 | 304.525  | 3.6    | 1.01182169  | 0.9293   | 1.012  |
| 103017_at   | 482.1  | 442.7  | 527.3  | 579.7  | 528.8  | 612.7  | 621.2  | 601.1  | 0.066694025 | 507.95  | 590.95   | 83     | 0.859548185 | 0.06614  | 1.167  |



|             |        |        |        |        |        |        |        |        |             |          |          |         |             |          |        |
|-------------|--------|--------|--------|--------|--------|--------|--------|--------|-------------|----------|----------|---------|-------------|----------|--------|
| 103018_at   | 542.7  | 629.2  | 731.1  | 925.6  | 680.9  | 663.7  | 889.1  | 930    | 0.466296631 | 707.15   | 790.925  | 83.775  | 0.894079717 | 0.4356   | 1.128  |
| 103020_s_at | 1076.4 | 1122.7 | 1278.8 | 1636.5 | 1235.4 | 907.5  | 1282.9 | 1558.8 | 0.865976899 | 1278.6   | 1246.15  | 32.45   | 1.026040204 | 0.8438   | 1.031  |
| 103021_r_at | 117.5  | 127.4  | 170.7  | 242.8  | 161.2  | 118.8  | 163.2  | 153    | 0.636626911 | 164.6    | 149.05   | 15.55   | 1.104327407 | 0.8036   | -1.051 |
| 103022_at   | 26.5   | 13.7   | 13.2   | 18     | 14.4   | 4.9    | 14     | 8      | 0.102595728 | 17.85    | 10.325   | 7.525   | 1.728813559 | 0.09506  | -1.817 |
| 103023_at   | 108.1  | 65.2   | 66.9   | 88.8   | 84.5   | 90.4   | 83.4   | 80.1   | 0.834316612 | 82.25    | 84.6     | 2.35    | 0.972222222 | 0.7029   | 1.051  |
| 103024_at   | 20.4   | 14.6   | 23.9   | 24.9   | 52.3   | 31.1   | 61     | 33.7   | 0.041565296 | 20.95    | 44.525   | 23.575  | 0.470522179 | 0.01156  | 2.085  |
| 103025_at   | 416.7  | 442.5  | 558.4  | 687.9  | 488.1  | 435.8  | 538.4  | 541.9  | 0.724402457 | 526.375  | 501.05   | 25.325  | 1.050543858 | 0.8011   | 1.034  |
| 103026_f_at | 241.7  | 265.4  | 208.4  | 184.4  | 205.5  | 250.7  | 164.6  | 226.1  | 0.622322505 | 224.975  | 211.725  | 13.25   | 1.062581178 | 0.6207   | -1.065 |
| 103027_at   | 1171.3 | 1131.1 | 1158.8 | 1068.8 | 1237.9 | 1138.4 | 1293.5 | 1211.6 | 0.072613573 | 1132.5   | 1220.35  | 87.85   | 0.928012455 | 0.06879  | 1.077  |
| 103028_at   | 87.4   | 70.1   | 50     | 67.3   | 47     | 103.2  | 67.5   | 62.3   | 0.930246833 | 68.7     | 70       | 1.3     | 0.981428571 | 0.9902   | 1.003  |
| 103029_at   | 1390.1 | 2007.5 | 1789.7 | 1890.9 | 2234.6 | 1499.7 | 1718.7 | 1760.7 | 0.874112006 | 1769.55  | 1803.425 | 33.875  | 0.981216297 | 0.8828   | 1.018  |
| 103030_at   | 351.9  | 342.4  | 651.8  | 608.1  | 351.6  | 414.9  | 581.5  | 540    | 0.87237076  | 488.55   | 472      | 16.55   | 1.035063559 | 0.9616   | 1.011  |
| 103031_g_at | 521.1  | 387    | 548.3  | 513.7  | 391.3  | 513.4  | 474.6  | 486.1  | 0.580146163 | 492.525  | 466.35   | 26.175  | 1.056127372 | 0.6244   | -1.052 |
| 103032_at   | 1007.1 | 1009.7 | 938.7  | 1063.3 | 1021.3 | 1004.2 | 1049.1 | 1168.3 | 0.264912968 | 1004.7   | 1060.725 | 56.025  | 0.947182352 | 0.2557   | 1.055  |
| 103033_at   | 181    | 188.4  | 176.8  | 142.8  | 266.7  | 253.4  | 265.8  | 274.7  | 0.000975672 | 172.25   | 265.15   | 92.9    | 0.649632284 | 0.000496 | 1.547  |
| 103034_at   | 536.2  | 468.4  | 445.4  | 431.1  | 430.9  | 588.1  | 417.8  | 464.9  | 0.913967808 | 470.275  | 475.425  | 5.15    | 0.989167587 | 0.9566   | 1.005  |
| 103035_at   | 230.2  | 210    | 192.8  | 202.7  | 270.1  | 255.9  | 287.6  | 241.7  | 0.005331079 | 208.925  | 263.825  | 54.9    | 0.791907514 | 0.004453 | 1.263  |
| 103036_at   | 538.6  | 540    | 520.3  | 517.7  | 733.5  | 529    | 587.3  | 585.2  | 0.165710392 | 529.15   | 608.75   | 79.6    | 0.869240246 | 0.1056   | 1.142  |
| 103037_at   | 473.3  | 374.3  | 362.3  | 348.1  | 425.1  | 479.9  | 401.9  | 396.6  | 0.334410068 | 389.5    | 425.875  | 36.375  | 0.914587614 | 0.294    | 1.098  |
| 103038_at   | 194    | 196    | 123.2  | 116.5  | 139.2  | 134.5  | 112    | 115.3  | 0.238522534 | 157.425  | 125.25   | 32.175  | 1.256886228 | 0.2266   | -1.226 |
| 103039_at   | 10.7   | 12.1   | 41.7   | 63     | 43.7   | 19.8   | 32.9   | 87.3   | 0.494803358 | 31.875   | 45.925   | 14.05   | 0.694066413 | 0.3935   | 1.643  |
| 103040_at   | 36.4   | 42.7   | 23.8   | 23.8   | 32.8   | 59     | 37.9   | 4.4    | 0.886724386 | 31.675   | 33.525   | 1.85    | 0.944817301 | 0.6887   | -1.285 |
| 103041_at   | 20.5   | 20     | 34.1   | 71.8   | 39.8   | 61.6   | 43.7   | 96.3   | 0.229121006 | 36.6     | 60.35    | 23.75   | 0.606462303 | 0.1567   | 1.791  |
| 103043_at   | 468.6  | 454.8  | 551.6  | 556.2  | 561.5  | 409.2  | 557.8  | 521.8  | 0.918399167 | 507.8    | 512.575  | 4.775   | 0.99068429  | 0.9528   | 1.006  |
| 103044_g_at | 953.1  | 864.3  | 649.4  | 715.4  | 602    | 959    | 619    | 705.9  | 0.517409139 | 795.55   | 721.475  | 74.075  | 1.10267161  | 0.4781   | -1.11  |
| 103045_at   | 47.8   | 30.1   | 53.9   | 77     | 38.8   | 43.6   | 36.4   | 54     | 0.437899611 | 52.2     | 43.2     | 9       | 1.208333333 | 0.5169   | -1.158 |
| 103046_at   | 95.5   | 119.8  | 76.6   | 126.3  | 123.6  | 148.3  | 112.8  | 86.3   | 0.472293374 | 104.55   | 117.75   | 13.2    | 0.887898089 | 0.4876   | 1.126  |
| 103047_at   | 651.9  | 760.1  | 878.9  | 835.8  | 899.3  | 775.7  | 779.9  | 817.3  | 0.555282647 | 781.675  | 818.05   | 36.375  | 0.955534503 | 0.5249   | 1.051  |
| 103048_at   | 344    | 402.9  | 446.9  | 572.8  | 325.8  | 319    | 380.9  | 468.7  | 0.30145119  | 441.65   | 373.6    | 68.05   | 1.182146681 | 0.2885   | -1.176 |
| 103049_at   | 564.2  | 323.3  | 363.3  | 443.9  | 324.7  | 408.8  | 336.1  | 389.5  | 0.361012391 | 423.675  | 364.775  | 58.9    | 1.161469399 | 0.365    | -1.141 |
| 103050_at   | 5110.3 | 5300.3 | 4329   | 3917   | 4631.5 | 5595.1 | 3905.7 | 4401.8 | 0.951368398 | 4664.15  | 4633.525 | 30.625  | 1.006609439 | 0.9434   | 1.008  |
| 103051_at   | 16.1   | 72.9   | 50.9   | 61.1   | 66.9   | 77.9   | 69.7   | 30.5   | 0.521352382 | 50.25    | 61.25    | 11      | 0.820408163 | 0.5175   | 1.319  |
| 103052_r_at | 522.6  | 501.6  | 581.7  | 655.2  | 582.9  | 583.5  | 700.5  | 768.4  | 0.157532628 | 565.275  | 658.825  | 93.55   | 0.858004781 | 0.1483   | 1.163  |
| 103053_at   | 70.4   | 194.4  | 149.4  | 71.7   | 181.9  | 80.2   | 55.4   | 192.1  | 0.902477045 | 121.475  | 127.4    | 5.925   | 0.953492936 | 0.9733   | 1.014  |
| 103054_at   | 615.8  | 695.6  | 1029.9 | 972.4  | 605.9  | 769.8  | 624.2  | 643.6  | 0.200666478 | 828.425  | 660.875  | 167.55  | 1.25352752  | 0.1806   | -1.23  |
| 103055_r_at | 812.6  | 683.9  | 661.3  | 790.6  | 579.4  | 979.9  | 684.8  | 698.3  | 0.987962631 | 737.1    | 735.6    | 1.5     | 1.002039152 | 0.8936   | -1.017 |
| 103056_at   | 537.3  | 531.3  | 591.8  | 669.9  | 521.2  | 509.9  | 502.3  | 522.9  | 0.121649431 | 582.575  | 514.075  | 68.5    | 1.13324904  | 0.06915  | -1.128 |
| 103057_at   | 680.7  | 703.7  | 668.5  | 751.1  | 666.3  | 726.7  | 632.5  | 623.1  | 0.24125125  | 701      | 662.15   | 38.85   | 1.058672506 | 0.229    | -1.06  |
| 103058_f_at | 22.1   | 8.6    | 11     | 8      | 7      | 19.1   | 9.6    | 4.7    | 0.628609072 | 12.425   | 10.1     | 2.325   | 1.23019802  | 0.517    | -1.297 |
| 103059_at   | 115.6  | 77.1   | 127.7  | 91.8   | 72     | 106.3  | 61.4   | 105.5  | 0.341658034 | 103.05   | 86.3     | 16.75   | 1.194090382 | 0.3377   | -1.205 |
| 103060_at   | 326.3  | 66.8   | 290.3  | 142.2  | 224.8  | 231.5  | 302.2  | 54.3   | 0.969706772 | 206.4    | 203.2    | 3.2     | 1.015748031 | 0.9812   | 1.013  |
| 103061_at   | 21.6   | 27.5   | 33.9   | 34.5   | 33.5   | 50.9   | 17.6   | 37.2   | 0.507730948 | 29.375   | 34.8     | 5.425   | 0.844109195 | 0.6465   | 1.127  |
| 103062_at   | 287.7  | 182.4  | 232    | 274.9  | 220.8  | 274.2  | 294.7  | 280.4  | 0.453465905 | 244.25   | 267.525  | 23.275  | 0.912998785 | 0.4392   | 1.106  |
| 103063_at   | 437.2  | 454    | 581.8  | 586.8  | 567.1  | 471.3  | 705.6  | 602.4  | 0.299465691 | 514.95   | 586.6    | 71.65   | 0.877855438 | 0.3032   | 1.138  |
| 103064_at   | 574.1  | 572.5  | 626    | 712.4  | 575.6  | 599.2  | 628.5  | 619.9  | 0.682081442 | 621.25   | 605.8    | 15.45   | 1.025503466 | 0.7058   | -1.022 |
| 103065_at   | 1236.5 | 1068.4 | 850.4  | 879.9  | 1311.9 | 1152.6 | 873.8  | 1155.6 | 0.405066498 | 1008.8   | 1123.475 | 114.675 | 0.897928303 | 0.4091   | 1.115  |
| 103066_at   | 97.3   | 113.8  | 138.2  | 123.3  | 144.8  | 176.6  | 134.6  | 153.3  | 0.033025889 | 118.15   | 152.325  | 34.175  | 0.775644182 | 0.03333  | 1.293  |
| 103067_at   | 645.3  | 608.8  | 764.6  | 694.1  | 673    | 609.7  | 682.6  | 689    | 0.719589645 | 678.2    | 663.575  | 14.625  | 1.022039709 | 0.7449   | -1.02  |
| 103068_at   | 173.1  | 200    | 226.5  | 162.3  | 217.6  | 188.2  | 201.7  | 186.1  | 0.646356722 | 190.475  | 198.4    | 7.925   | 0.960055444 | 0.5903   | 1.048  |
| 103069_at   | 478.8  | 273.5  | 316.1  | 352.5  | 282.9  | 541.1  | 377.9  | 371.1  | 0.605618371 | 355.225  | 393.25   | 38.025  | 0.903305785 | 0.6084   | 1.101  |
| 103070_at   | 194.1  | 208.4  | 234.7  | 251.9  | 238.2  | 202    | 256.8  | 223.9  | 0.663667591 | 222.275  | 230.225  | 7.95    | 0.965468563 | 0.6562   | 1.037  |
| 103071_at   | 423.7  | 539.2  | 616.6  | 709.9  | 525.9  | 389    | 657.6  | 702.1  | 0.969600012 | 572.35   | 568.65   | 3.7     | 1.006506639 | 0.937    | -1.014 |
| 103072_at   | 3071.4 | 4239.1 | 3539.8 | 2560.2 | 4577.2 | 4556.8 | 3377.5 | 3945.6 | 0.149191135 | 3352.625 | 4114.275 | 761.65  | 0.814876254 | 0.1476   | 1.239  |
| 103073_i_at | 4109.3 | 3080.1 | 3658   | 2605.2 | 3206.6 | 4344.8 | 2395.6 | 2453.6 | 0.657164748 | 3363.15  | 3100.15  | 263     | 1.084834605 | 0.5922   | -1.102 |
| 103074_f_at | 907.9  | 1373.2 | 1281.9 | 1472.5 | 1722.9 | 1172.7 | 1243.3 | 1447.6 | 0.45976435  | 1258.875 | 1396.625 | 137.75  | 0.901369373 | 0.4591   | 1.115  |
| 103075_at   | 126.2  | 146.5  | 210.8  | 282.6  | 206    | 249.7  | 158.9  | 206.6  | 0.745227788 | 191.525  | 205.3    | 13.775  | 0.932903069 | 0.6194   | 1.113  |



|             |        |        |        |        |        |        |        |        |             |          |          |         |             |          |        |
|-------------|--------|--------|--------|--------|--------|--------|--------|--------|-------------|----------|----------|---------|-------------|----------|--------|
| 103076_at   | 286.4  | 300.2  | 340.7  | 362.2  | 357.1  | 322.1  | 273.8  | 332.6  | 0.969901858 | 322.375  | 321.4    | 0.975   | 1.003033603 | 0.9692   | 1.003  |
| 103078_at   | 431.9  | 367.2  | 427.1  | 352    | 303.4  | 314.7  | 302.6  | 343.8  | 0.023014029 | 394.55   | 316.125  | 78.425  | 1.248082246 | 0.01077  | -1.245 |
| 103079_at   | 812.3  | 695.9  | 697.5  | 720.9  | 851.4  | 553.5  | 694.8  | 827.2  | 0.999240121 | 731.65   | 731.725  | 0.075   | 0.999897502 | 0.9126   | -1.012 |
| 103080_at   | 263.8  | 274.3  | 201.6  | 218.3  | 304.5  | 335.5  | 239.5  | 183.3  | 0.526917283 | 239.5    | 265.7    | 26.2    | 0.901392548 | 0.5989   | 1.089  |
| 103081_at   | 1335.5 | 1282.9 | 1301.1 | 1350.1 | 1276.5 | 1095.4 | 1314.3 | 1429.9 | 0.623524257 | 1317.4   | 1279.025 | 38.375  | 1.030003323 | 0.5723   | 1.035  |
| 103082_at   | 595.3  | 658.5  | 858.1  | 995.4  | 647.2  | 650.1  | 877.5  | 934.6  | 0.996621309 | 776.825  | 777.35   | 0.525   | 0.999324629 | 0.9624   | 1.008  |
| 103083_at   | 116.6  | 111.1  | 161.7  | 130.9  | 130.4  | 107.2  | 70.5   | 145.2  | 0.434512904 | 130.075  | 113.325  | 16.75   | 1.147804986 | 0.401    | -1.177 |
| 103084_at   | 18.1   | 11.8   | 5.7    | 6.5    | 8.5    | 12.7   | 28.2   | 7.7    | 0.530690918 | 10.525   | 14.275   | 3.75    | 0.737302977 | 0.5264   | 1.308  |
| 103085_at   | 224.4  | 148.7  | 142.5  | 175.9  | 156.6  | 245.5  | 159.6  | 219.8  | 0.467528187 | 172.875  | 195.375  | 22.5    | 0.884836852 | 0.4652   | 1.127  |
| 103086_at   | 52.7   | 53     | 49.8   | 72.5   | 55.9   | 88.6   | 97.2   | 68.5   | 0.117832429 | 57       | 77.55    | 20.55   | 0.735009671 | 0.09964  | 1.344  |
| 103087_at   | 121.7  | 123.9  | 67.3   | 60.1   | 94.4   | 121.2  | 92.7   | 84.9   | 0.801529236 | 93.25    | 98.3     | 5.05    | 0.948626653 | 0.6524   | 1.103  |
| 103088_at   | 2.7    | 3.5    | 25.8   | 3.2    | 3.2    | 19.8   | 2.8    | 3.5    | 0.841405747 | 8.8      | 7.325    | 1.475   | 1.201365188 | 0.9436   | -1.053 |
| 103089_at   | 63.4   | 60.1   | 50.4   | 72.5   | 62.1   | 58     | 75.1   | 58.4   | 0.777058414 | 61.6     | 63.4     | 1.8     | 0.971608833 | 0.7604   | 1.031  |
| 103090_at   | 433.3  | 580.3  | 703.7  | 553.2  | 339    | 538.2  | 557.4  | 521.7  | 0.335939898 | 567.625  | 489.075  | 78.55   | 1.160609313 | 0.3569   | -1.166 |
| 103091_at   | 171.3  | 151.7  | 183.8  | 147.6  | 144    | 226.3  | 129.4  | 164.8  | 0.91782045  | 163.6    | 166.125  | 2.525   | 0.984800602 | 0.9787   | 1.004  |
| 103092_at   | 643.5  | 659.2  | 644.8  | 731.3  | 632.7  | 687    | 669.2  | 731    | 0.736756929 | 669.7    | 679.975  | 10.275  | 0.98488915  | 0.7332   | 1.015  |
| 103094_at   | 1376.1 | 1602   | 1092   | 1381   | 1633.6 | 1433   | 1126   | 1417.9 | 0.796464339 | 1362.775 | 1402.625 | 39.85   | 0.971588985 | 0.8002   | 1.03   |
| 103095_at   | 107.1  | 247    | 259.5  | 329.9  | 322    | 435    | 294    | 321.8  | 0.111562575 | 235.875  | 343.2    | 107.325 | 0.687281469 | 0.1401   | 1.555  |
| 103096_at   | 137.9  | 127    | 154    | 141.1  | 147.3  | 204.4  | 115.6  | 192.1  | 0.316561822 | 140      | 164.85   | 24.85   | 0.8492569   | 0.3433   | 1.151  |
| 103097_at   | 469.1  | 445.8  | 449.2  | 410    | 424.7  | 430    | 398.3  | 399.5  | 0.092903136 | 443.525  | 413.125  | 30.4    | 1.073585477 | 0.0877   | -1.073 |
| 103098_at   | 693.6  | 586.9  | 534.4  | 400.5  | 590    | 603    | 461.3  | 586.6  | 0.93059789  | 553.85   | 560.225  | 6.375   | 0.988620643 | 0.8556   | -1.025 |
| 103099_f_at | 2011.7 | 1746.1 | 1983.3 | 2014.6 | 1933.8 | 1985.7 | 1853.3 | 2161.8 | 0.643830109 | 1938.925 | 1983.65  | 44.725  | 0.97745318  | 0.6457   | 1.023  |
| 103100_at   | 622.4  | 669.1  | 874.2  | 1107   | 791.8  | 780.5  | 1014.9 | 853.8  | 0.748560515 | 818.175  | 860.25   | 42.075  | 0.951089799 | 0.6414   | 1.074  |
| 103101_at   | 483.3  | 504.1  | 400.9  | 428.8  | 361.5  | 440.9  | 371.3  | 489    | 0.356131961 | 454.275  | 415.675  | 38.6    | 1.092861009 | 0.3397   | -1.097 |
| 103132_at   | 6.4    | 31.3   | 25.4   | 25.8   | 30.7   | 33.4   | 17.8   | 20.8   | 0.623297836 | 22.225   | 25.675   | 3.45    | 0.865628043 | 0.5283   | 1.303  |
| 103198_at   | 88.1   | 192.1  | 166    | 114.9  | 147.1  | 134.5  | 302.6  | 185.7  | 0.298501453 | 140.275  | 192.475  | 52.2    | 0.728795948 | 0.2685   | 1.362  |
| 103199_at   | 18.8   | 56.2   | 42.9   | 67.8   | 72.8   | 85.1   | 60     | 65     | 0.101799795 | 46.425   | 70.725   | 24.3    | 0.656415695 | 0.1292   | 1.674  |
| 103200_at   | 230    | 217    | 353.6  | 350    | 256.9  | 224.9  | 269.1  | 300.6  | 0.571726158 | 287.65   | 262.875  | 24.775  | 1.094246315 | 0.6476   | -1.072 |
| 103201_at   | 548.2  | 595.7  | 537    | 501    | 667.6  | 505.8  | 552    | 454.8  | 0.99354588  | 545.475  | 545.05   | 0.425   | 1.000779745 | 0.9236   | -1.009 |
| 103202_at   | 132.7  | 198.8  | 155.8  | 180.8  | 319.8  | 330    | 216    | 261.1  | 0.014859391 | 167.025  | 281.725  | 114.7   | 0.592865383 | 0.007737 | 1.682  |
| 103203_f_at | 92.5   | 72.8   | 127.8  | 271.4  | 135.4  | 112    | 111.3  | 106.8  | 0.62181181  | 141.125  | 116.375  | 24.75   | 1.212674544 | 0.8308   | -1.067 |
| 103204_r_at | 131.6  | 107.6  | 137.7  | 190.8  | 95.2   | 172.8  | 160.5  | 163.3  | 0.817397812 | 141.925  | 147.95   | 6.025   | 0.959276783 | 0.8468   | 1.038  |
| 103205_at   | 621.9  | 547.4  | 471.5  | 520.8  | 586    | 656.9  | 537.7  | 580    | 0.26184681  | 540.4    | 590.15   | 49.75   | 0.915699398 | 0.249    | 1.095  |
| 103206_at   | 184.3  | 180.5  | 244.9  | 228    | 277.2  | 230.9  | 268.1  | 204.4  | 0.175513099 | 209.425  | 245.15   | 35.725  | 0.854272894 | 0.1773   | 1.172  |
| 103207_at   | 556.9  | 536.1  | 527    | 443.7  | 521.2  | 652.2  | 597.2  | 428.5  | 0.565030533 | 515.925  | 549.775  | 33.85   | 0.938429357 | 0.6172   | 1.057  |
| 103208_at   | 50.7   | 69     | 11.3   | 24.2   | 41.2   | 51.2   | 40.3   | 59     | 0.545296895 | 38.8     | 47.925   | 9.125   | 0.809598331 | 0.3561   | 1.513  |
| 103209_at   | 89.9   | 128.4  | 110.2  | 172.3  | 130.4  | 116.2  | 185.1  | 186.4  | 0.291102381 | 125.2    | 154.525  | 29.325  | 0.810224883 | 0.28     | 1.242  |
| 103210_at   | 105.8  | 74.1   | 67.8   | 75     | 79.5   | 159.9  | 67.3   | 118.4  | 0.321146306 | 80.675   | 106.275  | 25.6    | 0.759115502 | 0.3275   | 1.262  |
| 103211_at   | 643.9  | 499.3  | 603.8  | 695.4  | 719.9  | 524.6  | 541.5  | 693.4  | 0.892360866 | 610.6    | 619.85   | 9.25    | 0.985077035 | 0.9132   | 1.012  |
| 103212_at   | 952.4  | 685.2  | 770.3  | 696.4  | 719.2  | 861    | 642.4  | 662.9  | 0.515776625 | 776.075  | 721.375  | 54.7    | 1.075827413 | 0.5064   | -1.073 |
| 103213_at   | 38.4   | 102.7  | 87.5   | 66.6   | 52.2   | 62.8   | 30.9   | 33.7   | 0.132725947 | 73.8     | 44.9     | 28.9    | 1.643652561 | 0.134    | -1.61  |
| 103214_at   | 76.5   | 100.5  | 62.8   | 55.2   | 90.9   | 97.3   | 98.3   | 65.9   | 0.297762445 | 73.75    | 88.1     | 14.35   | 0.837116913 | 0.2805   | 1.21   |
| 103215_g_at | 594.6  | 770.4  | 512.7  | 587.7  | 721.6  | 649.3  | 650.1  | 595.7  | 0.563007459 | 616.35   | 654.175  | 37.825  | 0.942179081 | 0.4929   | 1.071  |
| 103216_f_at | 381    | 305.2  | 278.9  | 270.5  | 340.6  | 308.1  | 312.1  | 269.5  | 0.965485588 | 308.9    | 307.575  | 1.325   | 1.004307892 | 0.9875   | 1.001  |
| 103217_at   | 200.7  | 127.1  | 120.4  | 226.9  | 96.6   | 133.1  | 228.3  | 217.5  | 0.998167336 | 168.775  | 168.875  | 0.1     | 0.999407846 | 0.9359   | -1.022 |
| 103218_at   | 837.4  | 651.2  | 813.5  | 563.8  | 701.8  | 815.9  | 704.2  | 696.3  | 0.863810973 | 716.475  | 729.55   | 13.075  | 0.982077993 | 0.7856   | 1.029  |
| 103219_at   | 81.7   | 76     | 68.9   | 50.3   | 46     | 84.7   | 55.6   | 74.5   | 0.730820788 | 69.225   | 65.2     | 4.025   | 1.061733129 | 0.6963   | -1.074 |
| 103220_at   | 529    | 486.6  | 566    | 592.6  | 468    | 499.7  | 469.3  | 578    | 0.294232345 | 543.55   | 503.75   | 39.8    | 1.079007444 | 0.2834   | -1.08  |
| 103221_at   | 402.8  | 483.4  | 381.3  | 329.1  | 413.1  | 349.9  | 385.8  | 366.7  | 0.591264626 | 399.15   | 378.875  | 20.275  | 1.053513692 | 0.6266   | -1.046 |
| 103222_at   | 295.4  | 377.5  | 464.4  | 552.9  | 309.2  | 251.1  | 355    | 396.1  | 0.200176014 | 422.55   | 327.85   | 94.7    | 1.288851609 | 0.1992   | -1.273 |
| 103223_at   | 109.2  | 120.1  | 182.8  | 224.9  | 97.3   | 86.6   | 105.3  | 106.5  | 0.112082526 | 159.25   | 98.925   | 60.325  | 1.609805408 | 0.05016  | -1.545 |
| 103224_at   | 143.8  | 139.3  | 115.8  | 90.3   | 139.7  | 157.2  | 113.1  | 150.3  | 0.301944477 | 122.3    | 140.075  | 17.775  | 0.873103694 | 0.3065   | 1.155  |
| 103225_at   | 287.8  | 208.9  | 207.7  | 260.2  | 256.9  | 275.5  | 308.6  | 254.3  | 0.220882552 | 241.15   | 273.825  | 32.675  | 0.880671962 | 0.1994   | 1.143  |
| 103226_at   | 97.5   | 144.8  | 160.9  | 118.4  | 82     | 149.5  | 134.7  | 130.3  | 0.76741757  | 130.4    | 124.125  | 6.275   | 1.050553877 | 0.7578   | -1.058 |
| 103227_at   | 17.4   | 2.1    | 9.4    | 10.8   | 11.4   | 8.1    | 7.6    | 7.2    | 0.704322089 | 9.925    | 8.575    | 1.35    | 1.157434402 | 0.874    | 1.081  |
| 103228_at   | 44.5   | 37.5   | 55.3   | 91.8   | 55.9   | 84.8   | 86     | 88.6   | 0.19153851  | 57.275   | 78.825   | 21.55   | 0.726609578 | 0.155    | 1.437  |



|             |        |        |        |        |        |        |       |        |             |          |          |         |             |         |        |
|-------------|--------|--------|--------|--------|--------|--------|-------|--------|-------------|----------|----------|---------|-------------|---------|--------|
| 103229_at   | 137.7  | 126.1  | 171.4  | 200.6  | 135.4  | 194.9  | 166.6 | 178.6  | 0.655284382 | 158.95   | 168.875  | 9.925   | 0.941228719 | 0.6203  | 1.071  |
| 103231_at   | 100.7  | 118.4  | 106.6  | 127.2  | 149.1  | 118.2  | 96.4  | 140    | 0.385360936 | 113.225  | 125.925  | 12.7    | 0.899146317 | 0.4167  | 1.101  |
| 103232_at   | 283.3  | 239.6  | 418.3  | 433.4  | 298.4  | 146    | 312.8 | 325.1  | 0.297870272 | 343.65   | 270.575  | 73.075  | 1.270072993 | 0.3285  | -1.291 |
| 103233_at   | 104.3  | 84.2   | 142    | 132    | 70.9   | 118.9  | 161.1 | 115.2  | 0.969722861 | 115.625  | 116.525  | 0.9     | 0.992276336 | 0.9523  | 1.013  |
| 103234_at   | 163.6  | 95     | 111.9  | 174.6  | 154.5  | 186.6  | 123.4 | 157.3  | 0.446471789 | 136.275  | 155.45   | 19.175  | 0.87664844  | 0.4032  | 1.165  |
| 103235_at   | 124.7  | 219.2  | 180.1  | 115.1  | 153    | 484.6  | 165.2 | 145.6  | 0.426482513 | 159.775  | 237.1    | 77.325  | 0.673871784 | 0.4116  | 1.332  |
| 103236_at   | 113.9  | 117.4  | 116.3  | 123.3  | 94.5   | 141.4  | 86.7  | 124.1  | 0.670240126 | 117.725  | 111.675  | 6.05    | 1.054175062 | 0.5551  | -1.075 |
| 103237_at   | 431.1  | 408.3  | 305.6  | 302.5  | 331.2  | 363.9  | 313   | 267.4  | 0.324391883 | 361.875  | 318.875  | 43      | 1.134849079 | 0.3335  | -1.127 |
| 103238_at   | 118.2  | 173.4  | 240.8  | 153.2  | 135.8  | 139.2  | 121.6 | 257.3  | 0.852340872 | 171.4    | 163.475  | 7.925   | 1.048478361 | 0.794   | -1.063 |
| 103239_at   | 8.5    | 7.3    | 10.8   | 5.1    | 13     | 9.7    | 3.3   | 5.4    | 0.977099839 | 7.925    | 7.85     | 0.075   | 1.00955414  | 0.7742  | -1.109 |
| 103240_f_at | 144.8  | 58.7   | 79.4   | 84.1   | 93.5   | 152.4  | 81    | 85.8   | 0.662434499 | 91.75    | 103.175  | 11.425  | 0.889265811 | 0.5779  | 1.15   |
| 103241_at   | 1178   | 1271.8 | 1153.3 | 1043   | 1473.9 | 1268.6 | 845.8 | 1167.2 | 0.854325426 | 1161.525 | 1188.875 | 27.35   | 0.976995058 | 0.9631  | 1.006  |
| 103242_at   | 717.3  | 595.9  | 826.7  | 702.5  | 661.5  | 663.7  | 714.1 | 648.2  | 0.481805498 | 710.6    | 671.875  | 38.725  | 1.057637209 | 0.5033  | -1.051 |
| 103243_at   | 311.3  | 248.3  | 217.6  | 434.7  | 169.4  | 375.3  | 372.1 | 380.2  | 0.773174047 | 302.975  | 324.25   | 21.275  | 0.934387047 | 0.8431  | 1.053  |
| 103244_at   | 261.8  | 300.3  | 162.3  | 195.6  | 222.4  | 259.9  | 223.6 | 228.2  | 0.919558984 | 230      | 233.525  | 3.525   | 0.984905256 | 0.7814  | 1.043  |
| 103245_at   | 1709.4 | 1627.5 | 1472.5 | 1316.1 | 2562.3 | 1794.7 | 1887  | 2208.1 | 0.035634372 | 1531.375 | 2113.025 | 581.65  | 0.724731132 | 0.01878 | 1.373  |
| 103247_at   | 181.4  | 136.5  | 162.1  | 225.9  | 177.1  | 223.8  | 177.5 | 235.4  | 0.310844952 | 176.475  | 203.45   | 26.975  | 0.867412141 | 0.2899  | 1.162  |
| 103248_at   | 404.4  | 367.1  | 488    | 486.4  | 408.4  | 444    | 477.9 | 463    | 0.741917349 | 436.475  | 448.325  | 11.85   | 0.973568282 | 0.6928  | 1.033  |
| 103249_at   | 18.5   | 26.6   | 19.6   | 16.5   | 21.8   | 31.2   | 14.9  | 23.6   | 0.547618872 | 20.3     | 22.875   | 2.575   | 0.887431694 | 0.5965  | 1.108  |
| 103250_at   | 26.6   | 38.1   | 30.2   | 55.5   | 42.8   | 51.1   | 18.8  | 50.7   | 0.755377406 | 37.6     | 40.85    | 3.25    | 0.920440636 | 0.8621  | 1.054  |
| 103251_at   | 285.1  | 325    | 277.9  | 291.5  | 339.1  | 315.6  | 307.3 | 348.2  | 0.061103677 | 294.875  | 327.55   | 32.675  | 0.900244238 | 0.05868 | 1.111  |
| 103252_at   | 7.4    | 5.4    | 18.3   | 31.5   | 23.5   | 27.3   | 22.4  | 21.9   | 0.269815123 | 15.65    | 23.775   | 8.125   | 0.658254469 | 0.1607  | 1.919  |
| 103253_at   | 24.5   | 10.1   | 12.8   | 22.9   | 14.9   | 13.2   | 12.2  | 15.3   | 0.384972232 | 17.575   | 13.9     | 3.675   | 1.264388489 | 0.4761  | -1.186 |
| 103254_at   | 391.9  | 480.8  | 512.1  | 417.1  | 651.7  | 492.4  | 434.8 | 491.3  | 0.27306544  | 450.475  | 517.55   | 67.075  | 0.870398995 | 0.2546  | 1.142  |
| 103255_at   | 312.6  | 354    | 318.6  | 318.9  | 361.9  | 272.4  | 350.4 | 376.7  | 0.599306246 | 326.025  | 340.35   | 14.325  | 0.957910974 | 0.6598  | 1.037  |
| 103256_at   | 87.7   | 54.5   | 49.2   | 67.5   | 60.8   | 82.4   | 74.7  | 111.3  | 0.247985438 | 64.725   | 82.3     | 17.575  | 0.786452005 | 0.2273  | 1.273  |
| 103257_at   | 27.9   | 43.7   | 27.8   | 32.9   | 47.8   | 21.9   | 26.9  | 10.7   | 0.505796232 | 33.075   | 26.825   | 6.25    | 1.232991612 | 0.3541  | -1.39  |
| 103258_at   | 20.4   | 38     | 42.4   | 43     | 41.3   | 36.6   | 5.4   | 43.7   | 0.702439741 | 35.95    | 31.75    | 4.2     | 1.132283465 | 0.5429  | -1.413 |
| 103259_at   | 3.7    | 17.7   | 13.6   | 10.8   | 10.7   | 39.2   | 10.4  | 19.6   | 0.310220794 | 11.45    | 19.975   | 8.525   | 0.573216521 | 0.2846  | 1.722  |
| 103260_at   | 238    | 198.2  | 267.3  | 407.7  | 161.1  | 238    | 202.8 | 263.4  | 0.286871888 | 277.8    | 216.325  | 61.475  | 1.284178897 | 0.2641  | -1.259 |
| 103261_at   | 362.8  | 292    | 546.8  | 594.7  | 372.6  | 320.5  | 375.4 | 374.8  | 0.311673673 | 449.075  | 360.825  | 88.25   | 1.244578397 | 0.3398  | -1.197 |
| 103262_at   | 13.3   | 44     | 46.6   | 15.9   | 12.7   | 13.6   | 44.5  | 32.2   | 0.733512804 | 29.95    | 25.75    | 4.2     | 1.163106796 | 0.7732  | -1.147 |
| 103263_at   | 1329.3 | 959.6  | 948.8  | 1023.4 | 1242.6 | 1266.6 | 921.2 | 1148.2 | 0.530736428 | 1065.275 | 1144.65  | 79.375  | 0.930655659 | 0.5171  | 1.077  |
| 103264_at   | 123    | 79.3   | 124.8  | 152.4  | 64     | 95.9   | 182.7 | 173.7  | 0.7917668   | 119.875  | 129.075  | 9.2     | 0.92872361  | 0.967   | 1.012  |
| 103265_r_at | 8.3    | 4.1    | 5      | 6.2    | 4.9    | 14.2   | 7.6   | 6      | 0.372190941 | 5.9      | 8.175    | 2.275   | 0.721712538 | 0.3562  | 1.317  |
| 103266_at   | 49.3   | 45.9   | 30.8   | 43.1   | 41     | 55     | 42    | 44.5   | 0.540792595 | 42.275   | 45.625   | 3.35    | 0.926575342 | 0.519   | 1.088  |
| 103267_i_at | 11.2   | 6      | 8.5    | 7.3    | 7.2    | 11.9   | 10.9  | 10.8   | 0.245153096 | 8.25     | 10.2     | 1.95    | 0.808823529 | 0.2467  | 1.247  |
| 103268_r_at | 12.4   | 22     | 25.4   | 50.8   | 43.4   | 63.6   | 75.4  | 25.1   | 0.133992621 | 27.65    | 51.875   | 24.225  | 0.533012048 | 0.1259  | 1.96   |
| 103269_f_at | 214.3  | 184.8  | 258.8  | 381.7  | 340.8  | 298.9  | 392.8 | 434.4  | 0.094362646 | 259.9    | 366.725  | 106.825 | 0.708705433 | 0.07971 | 1.452  |
| 103270_at   | 464.8  | 343.3  | 407.4  | 348.9  | 322.2  | 433    | 379.4 | 368.7  | 0.690708039 | 391.1    | 375.825  | 15.275  | 1.040643917 | 0.7014  | -1.038 |
| 103271_at   | 29.1   | 14.9   | 18.3   | 34.5   | 14.2   | 6.4    | 50.7  | 28.8   | 0.942339465 | 24.2     | 25.025   | 0.825   | 0.967032967 | 0.7236  | -1.199 |
| 103272_at   | 295.7  | 299    | 245.8  | 287.9  | 286.7  | 376.3  | 217   | 315.7  | 0.659605048 | 282.1    | 298.925  | 16.825  | 0.943714979 | 0.7481  | 1.042  |
| 103273_s_at | 47.8   | 39.1   | 42.7   | 48     | 51.8   | 63.9   | 39.7  | 51.9   | 0.238629672 | 44.4     | 51.825   | 7.425   | 0.856729378 | 0.2356  | 1.155  |
| 103274_at   | 44     | 21.1   | 44.1   | 46     | 47.4   | 71.8   | 42.5  | 16.7   | 0.670132285 | 38.8     | 44.6     | 5.8     | 0.869955157 | 0.8658  | 1.066  |
| 103275_at   | 251.3  | 138.2  | 239.6  | 209.5  | 135.1  | 222.7  | 188.2 | 206.6  | 0.525252712 | 209.65   | 188.15   | 21.5    | 1.114270529 | 0.589   | -1.105 |
| 103276_at   | 158.1  | 145    | 142.2  | 233    | 163.3  | 171.3  | 219.4 | 217.6  | 0.409597577 | 169.575  | 192.9    | 23.325  | 0.879082426 | 0.3494  | 1.152  |
| 103277_s_at | 453.6  | 356.5  | 520.3  | 635.9  | 460.4  | 435.7  | 521   | 646.3  | 0.758340365 | 491.575  | 515.85   | 24.275  | 0.952941747 | 0.711   | 1.06   |
| 103278_at   | 21.3   | 17.6   | 12.6   | 39.6   | 44.1   | 59.4   | 47.5  | 60.4   | 0.007364566 | 22.775   | 52.85    | 30.075  | 0.430936613 | 0.01081 | 2.516  |
| 103279_at   | 11.7   | 8.5    | 1.9    | 3.5    | 3      | 6.3    | 4.4   | 3.5    | 0.430870534 | 6.4      | 4.3      | 2.1     | 1.488372093 | 0.686   | -1.21  |
| 103281_at   | 183.4  | 190.9  | 278.3  | 408.3  | 186.1  | 139.2  | 337.5 | 262.6  | 0.637127097 | 265.225  | 231.35   | 33.875  | 1.146423168 | 0.6284  | -1.147 |
| 103282_at   | 216    | 172.9  | 184.6  | 240.8  | 145.6  | 230.8  | 226.5 | 191.8  | 0.851564106 | 203.575  | 198.675  | 4.9     | 1.024663395 | 0.8135  | -1.033 |
| 103283_at   | 8.1    | 14.3   | 3.7    | 7.1    | 4.1    | 11.7   | 5.2   | 5.2    | 0.557699189 | 8.3      | 6.55     | 1.75    | 1.267175573 | 0.5681  | -1.244 |
| 103284_at   | 18.6   | 15.3   | 20.3   | 19.9   | 22     | 32.1   | 21.9  | 25.7   | 0.055843027 | 18.525   | 25.425   | 6.9     | 0.728613569 | 0.03132 | 1.364  |
| 103285_at   | 193.8  | 219.1  | 183.7  | 226.5  | 191    | 194.1  | 227.9 | 262.4  | 0.534351424 | 205.775  | 218.85   | 13.075  | 0.940255883 | 0.5514  | 1.058  |
| 103286_at   | 363.6  | 318.8  | 292.5  | 348.6  | 247.6  | 401.9  | 292.9 | 230.4  | 0.417327926 | 330.875  | 293.2    | 37.675  | 1.128495907 | 0.3284  | -1.152 |
| 103288_at   | 654.7  | 799.4  | 817.4  | 868.7  | 537.1  | 658.3  | 1011  | 690    | 0.611123664 | 785.05   | 724.1    | 60.95   | 1.084173457 | 0.5077  | -1.108 |



|             |        |        |        |        |        |        |        |        |             |          |          |         |             |          |        |
|-------------|--------|--------|--------|--------|--------|--------|--------|--------|-------------|----------|----------|---------|-------------|----------|--------|
| 103289_at   | 63.4   | 71.9   | 90.6   | 100.7  | 112.2  | 88.4   | 81.6   | 105.8  | 0.218953465 | 81.65    | 97       | 15.35   | 0.841752577 | 0.2134   | 1.197  |
| 103291_at   | 268.8  | 198    | 187.1  | 213.4  | 207.5  | 249.5  | 165.1  | 224.9  | 0.848250779 | 216.825  | 211.75   | 5.075   | 1.023966942 | 0.8385   | -1.026 |
| 103292_at   | 86.1   | 84.5   | 96.3   | 100.7  | 70.8   | 48.8   | 82.3   | 82.9   | 0.074627387 | 91.9     | 71.2     | 20.7    | 1.290730337 | 0.081    | -1.316 |
| 103293_at   | 348.3  | 284.6  | 282.2  | 245.8  | 254.7  | 301.7  | 259.9  | 284.8  | 0.563017802 | 290.225  | 275.275  | 14.95   | 1.054309327 | 0.5838   | -1.049 |
| 103294_at   | 292.1  | 283.1  | 274.8  | 279.7  | 307.4  | 307.3  | 339.6  | 304.8  | 0.022277555 | 282.425  | 314.775  | 32.35   | 0.897228179 | 0.009585 | 1.114  |
| 103295_at   | 459.3  | 456.7  | 446    | 569.7  | 395.5  | 474.2  | 651.9  | 649.5  | 0.442515696 | 482.925  | 542.775  | 59.85   | 0.889733315 | 0.491    | 1.105  |
| 103296_at   | 4417.1 | 2837.3 | 3253.7 | 3204   | 982.8  | 781.1  | 1019.2 | 1886.8 | 0.002341015 | 3428.025 | 1167.475 | 2260.55 | 2.936272725 | 0.001803 | -3.067 |
| 103297_at   | 24.3   | 17.1   | 14.9   | 19.1   | 61.5   | 25.9   | 51.1   | 20.2   | 0.124333585 | 18.85    | 39.675   | 20.825  | 0.475110271 | 0.06119  | 1.929  |
| 103298_at   | 67.6   | 27.9   | 78     | 49.3   | 74.5   | 30.9   | 77.9   | 69.1   | 0.649487581 | 55.7     | 63.1     | 7.4     | 0.882725832 | 0.6867   | 1.143  |
| 103299_at   | 104.4  | 70     | 69.6   | 84.9   | 80.8   | 87.9   | 64.9   | 76.4   | 0.641206621 | 82.225   | 77.5     | 4.725   | 1.060967742 | 0.6736   | -1.052 |
| 103300_at   | 339.3  | 344.4  | 391.5  | 356.7  | 398.2  | 395.1  | 391.6  | 347.9  | 0.181399153 | 357.975  | 383.2    | 25.225  | 0.934172756 | 0.1825   | 1.071  |
| 103301_i_at | 91.3   | 43.7   | 87.2   | 125.6  | 97.4   | 118.1  | 84     | 82.6   | 0.668478765 | 86.95    | 95.525   | 8.575   | 0.910232923 | 0.5499   | 1.162  |
| 103302_r_at | 224.4  | 196.1  | 218.4  | 271.5  | 113.6  | 301.9  | 203    | 198.7  | 0.605653131 | 227.6    | 204.3    | 23.3    | 1.114047969 | 0.4821   | -1.172 |
| 103303_at   | 71.1   | 33.1   | 59.9   | 91.3   | 64     | 89.3   | 59.2   | 101.5  | 0.390689904 | 63.85    | 78.5     | 14.65   | 0.813375796 | 0.367    | 1.278  |
| 103305_at   | 30.5   | 25.8   | 15.6   | 47.3   | 71.8   | 28.5   | 20.3   | 23.4   | 0.672193211 | 29.8     | 36       | 6.2     | 0.827777778 | 0.7358   | 1.138  |
| 103306_at   | 70     | 47.5   | 44.7   | 77.4   | 85.2   | 90.8   | 56.3   | 23.8   | 0.822966105 | 59.9     | 64.025   | 4.125   | 0.935572042 | 0.9417   | -1.026 |
| 103308_at   | 462.9  | 510.8  | 576    | 624.3  | 711.1  | 605.4  | 697.3  | 663.7  | 0.0302248   | 543.5    | 669.375  | 125.875 | 0.811951447 | 0.02963  | 1.237  |
| 103309_at   | 403.1  | 373.8  | 491.3  | 615.8  | 559.6  | 452.5  | 473.7  | 735.2  | 0.35659828  | 471      | 555.25   | 84.25   | 0.848266547 | 0.3331   | 1.179  |
| 103310_at   | 260.6  | 358.5  | 338.5  | 417.1  | 380.5  | 300    | 349.2  | 403.3  | 0.725044029 | 343.675  | 358.25   | 14.575  | 0.95931612  | 0.6882   | 1.051  |
| 103311_at   | 586.8  | 569.7  | 867.5  | 949.2  | 664.6  | 830.5  | 1034.6 | 903.8  | 0.390158726 | 743.3    | 858.375  | 115.075 | 0.865938547 | 0.3669   | 1.17   |
| 103312_f_at | 692.1  | 843.9  | 729.4  | 753.9  | 981.8  | 783.3  | 693.5  | 680.8  | 0.714128864 | 754.825  | 784.85   | 30.025  | 0.961744282 | 0.7555   | 1.031  |
| 103313_r_at | 20.2   | 25.7   | 21.4   | 29.4   | 29.3   | 29.3   | 26.4   | 23.2   | 0.309009978 | 24.175   | 27.05    | 2.875   | 0.893715342 | 0.2853   | 1.127  |
| 103314_at   | 183.4  | 256    | 186.5  | 269.7  | 271.6  | 152.1  | 247.3  | 277.5  | 0.732861694 | 223.9    | 237.125  | 13.225  | 0.944227728 | 0.8024   | 1.047  |
| 103315_at   | 768.9  | 766.8  | 775.1  | 804.3  | 798.5  | 711.1  | 1012.8 | 937    | 0.294355278 | 778.775  | 864.85   | 86.075  | 0.900474071 | 0.2782   | 1.1    |
| 103316_at   | 376.6  | 344.9  | 374    | 525.5  | 403.3  | 321.3  | 435.3  | 526    | 0.791605632 | 405.25   | 421.475  | 16.225  | 0.961504241 | 0.7949   | 1.038  |
| 103317_at   | 30     | 35.8   | 31.7   | 50.2   | 63.1   | 27.3   | 22.4   | 37.1   | 0.959204104 | 36.925   | 37.475   | 0.55    | 0.985323549 | 0.8673   | -1.045 |
| 103318_at   | 362.3  | 272.2  | 343.5  | 346.7  | 310.2  | 325    | 316    | 342.1  | 0.731979419 | 331.175  | 323.325  | 7.85    | 1.024278976 | 0.7917   | -1.019 |
| 103319_at   | 251.8  | 281.1  | 248.7  | 324.5  | 294    | 347.1  | 274.2  | 372.3  | 0.169068074 | 276.525  | 321.9    | 45.375  | 0.859040075 | 0.1615   | 1.162  |
| 103321_at   | 235.6  | 201.9  | 257.6  | 277.4  | 242.4  | 223.2  | 325.5  | 338.9  | 0.293261048 | 243.125  | 282.5    | 39.375  | 0.860619469 | 0.3028   | 1.151  |
| 103322_at   | 911.1  | 836.5  | 906    | 1010.2 | 964.9  | 888.9  | 1047.4 | 1142.6 | 0.20290294  | 915.95   | 1010.95  | 95      | 0.906028983 | 0.196    | 1.101  |
| 103326_at   | 246.1  | 262.3  | 271    | 319.1  | 296.7  | 267    | 298.5  | 347.3  | 0.270625455 | 274.625  | 302.375  | 27.75   | 0.90822654  | 0.2595   | 1.101  |
| 103327_at   | 1224.1 | 955.6  | 901.7  | 747    | 686.1  | 788.3  | 562.9  | 556.3  | 0.044922219 | 957.1    | 648.4    | 308.7   | 1.476095003 | 0.02685  | -1.469 |
| 103328_at   | 271.2  | 298.2  | 339.9  | 356.8  | 324.7  | 353.1  | 399.6  | 360.3  | 0.137817367 | 316.525  | 359.425  | 42.9    | 0.880642693 | 0.1358   | 1.139  |
| 103329_at   | 42.8   | 26.5   | 18.1   | 25.7   | 20.3   | 58.6   | 25.5   | 13     | 0.928575965 | 28.275   | 29.35    | 1.075   | 0.963373083 | 0.8463   | -1.076 |
| 103330_at   | 331.9  | 281.6  | 483.2  | 657.9  | 426.8  | 289.6  | 577.5  | 578.4  | 0.7974408   | 438.65   | 468.075  | 29.425  | 0.937136143 | 0.7547   | 1.086  |
| 103331_at   | 86.6   | 37.6   | 98.9   | 87.4   | 17.7   | 110    | 62.7   | 111.2  | 0.935493175 | 77.625   | 75.4     | 2.225   | 1.029509284 | 0.7206   | -1.2   |
| 103332_at   | 270.2  | 339.7  | 346.4  | 430.8  | 430.4  | 364.6  | 434.7  | 398.1  | 0.170070088 | 346.775  | 406.95   | 60.175  | 0.852131712 | 0.1502   | 1.186  |
| 103333_at   | 235.9  | 89.5   | 126.3  | 110.3  | 134.2  | 257.5  | 112.8  | 126.1  | 0.726906091 | 140.5    | 157.65   | 17.15   | 0.891214716 | 0.6623   | 1.137  |
| 103334_at   | 310    | 286.2  | 288.7  | 240.5  | 334.7  | 322.7  | 250.1  | 265.9  | 0.655568017 | 281.35   | 293.35   | 12      | 0.959093233 | 0.6834   | 1.039  |
| 103335_at   | 815.4  | 641    | 653.1  | 523.7  | 826.8  | 812.9  | 607.7  | 748.3  | 0.291393798 | 658.3    | 748.925  | 90.625  | 0.878993224 | 0.2875   | 1.143  |
| 103336_r_at | 9.6    | 9.3    | 7.4    | 9.3    | 0.5    | 2.6    | 17.9   | 8.9    | 0.740783756 | 8.9      | 7.475    | 1.425   | 1.190635452 | 0.3235   | -2.344 |
| 103338_at   | 176.7  | 214.3  | 151    | 115.3  | 157    | 224.2  | 120.2  | 123.8  | 0.809864698 | 164.325  | 156.3    | 8.025   | 1.05134357  | 0.777    | -1.059 |
| 103340_at   | 178.1  | 212    | 129    | 156.5  | 195.7  | 178.4  | 99.7   | 165.6  | 0.752213263 | 168.9    | 159.85   | 9.05    | 1.056615577 | 0.7169   | -1.072 |
| 103341_at   | 2407.2 | 1919   | 2181.8 | 2234.6 | 2118.6 | 2255.8 | 2358.4 | 2185.3 | 0.716496118 | 2185.65  | 2229.525 | 43.875  | 0.98032092  | 0.6847   | 1.023  |
| 103342_at   | 598.2  | 639.4  | 693.9  | 745.3  | 892.8  | 659.6  | 695.6  | 865.2  | 0.169123203 | 669.2    | 778.3    | 109.1   | 0.85982269  | 0.1564   | 1.157  |
| 103343_at   | 104.5  | 77.8   | 145.5  | 152.7  | 77.9   | 107.7  | 104.6  | 88.6   | 0.252994746 | 120.125  | 94.7     | 25.425  | 1.268479409 | 0.273    | -1.234 |
| 103344_at   | 321.1  | 379    | 343.8  | 415.3  | 407.7  | 358.9  | 477.1  | 447.4  | 0.130492099 | 364.8    | 422.775  | 57.975  | 0.862870321 | 0.1298   | 1.158  |
| 103345_at   | 2536.5 | 2725   | 2651.2 | 2513.3 | 2393.4 | 2250.6 | 2900.6 | 2462.5 | 0.522395362 | 2606.5   | 2501.775 | 104.725 | 1.041860279 | 0.463    | -1.046 |
| 103346_at   | 689.9  | 644.1  | 676.9  | 841.4  | 633.3  | 764.5  | 773.5  | 798.5  | 0.627755045 | 713.075  | 742.45   | 29.375  | 0.960435046 | 0.6157   | 1.043  |
| 103347_at   | 400.1  | 351.6  | 335.8  | 488.4  | 353.2  | 344.7  | 295.9  | 385.2  | 0.266769181 | 393.975  | 344.75   | 49.225  | 1.142784627 | 0.2518   | -1.136 |
| 103348_at   | 527.4  | 490.7  | 559    | 639.9  | 474.7  | 611.8  | 636.7  | 661.8  | 0.456241569 | 554.25   | 596.25   | 42      | 0.929559748 | 0.4854   | 1.072  |
| 103349_at   | 48.2   | 82.1   | 87.7   | 67.1   | 81.5   | 104.8  | 72.3   | 87.5   | 0.224332443 | 71.275   | 86.525   | 15.25   | 0.823750361 | 0.2251   | 1.234  |
| 103350_at   | 3058.5 | 3398.7 | 2804.9 | 2028   | 2945.4 | 2332.2 | 2417.3 | 2500.6 | 0.440378218 | 2822.525 | 2548.875 | 273.65  | 1.107361091 | 0.4986   | -1.092 |
| 103352_at   | 617.9  | 573.2  | 582.4  | 477.3  | 575.6  | 719.2  | 598.4  | 597.1  | 0.226115039 | 562.7    | 622.575  | 59.875  | 0.903826848 | 0.2237   | 1.107  |
| 103353_f_at | 272.8  | 183.5  | 175.7  | 197.5  | 232.4  | 373.4  | 209    | 238.8  | 0.254005865 | 207.375  | 263.4    | 56.025  | 0.787300683 | 0.2094   | 1.257  |
| 103354_at   | 1087.3 | 1025.4 | 812.5  | 860.1  | 1067.4 | 1060.8 | 724.2  | 826.4  | 0.814150173 | 946.325  | 919.7    | 26.625  | 1.028949657 | 0.7779   | -1.036 |



|             |        |        |        |        |        |        |        |        |             |          |          |         |             |          |        |
|-------------|--------|--------|--------|--------|--------|--------|--------|--------|-------------|----------|----------|---------|-------------|----------|--------|
| 103355_at   | 15.5   | 21.7   | 6.3    | 31.6   | 5.9    | 31.2   | 39.3   | 39     | 0.335285619 | 18.775   | 28.85    | 10.075  | 0.650779896 | 0.5551   | 1.433  |
| 103356_at   | 133.4  | 135.3  | 142    | 159.4  | 122.8  | 94.7   | 130.3  | 95.2   | 0.033240531 | 142.525  | 110.75   | 31.775  | 1.286907449 | 0.03147  | -1.297 |
| 103357_at   | 38.7   | 26.3   | 16.1   | 22.9   | 27     | 30.9   | 22.3   | 29.4   | 0.797319361 | 26       | 27.4     | 1.4     | 0.948905109 | 0.6448   | 1.099  |
| 103359_at   | 389.7  | 297.8  | 385.7  | 336.9  | 383.5  | 439.1  | 417.4  | 353    | 0.165675881 | 352.525  | 398.25   | 45.725  | 0.885185185 | 0.1694   | 1.133  |
| 103360_at   | 21.5   | 9.4    | 7.9    | 14.6   | 11.4   | 13.3   | 9.3    | 11.9   | 0.59228968  | 13.35    | 11.475   | 1.875   | 1.163398693 | 0.7358   | -1.088 |
| 103361_at   | 50.3   | 40.2   | 39     | 25.5   | 26.3   | 49.9   | 43.6   | 38.7   | 0.90640357  | 38.75    | 39.625   | 0.875   | 0.977917981 | 0.9085   | 1.024  |
| 103362_at   | 34.4   | 58.6   | 44.6   | 15.5   | 7      | 8      | 40.3   | 36.5   | 0.274513337 | 38.275   | 22.95    | 15.325  | 1.667755991 | 0.2478   | -2.028 |
| 103363_at   | 399.4  | 293.2  | 303    | 344.5  | 345.9  | 343    | 288.1  | 394.7  | 0.816332806 | 335.025  | 342.925  | 7.9     | 0.976962893 | 0.8055   | 1.025  |
| 103364_f_at | 868.5  | 796.4  | 811    | 759.8  | 963.2  | 1054.9 | 769.7  | 957.5  | 0.120258112 | 808.925  | 936.325  | 127.4   | 0.863936133 | 0.09968  | 1.151  |
| 103365_s_at | 6.8    | 8      | 8.8    | 9.6    | 7.3    | 11.6   | 6.5    | 4.7    | 0.649689704 | 8.3      | 7.525    | 0.775   | 1.102990033 | 0.4999   | -1.158 |
| 103366_at   | 195.8  | 109.1  | 116.7  | 130.8  | 136.3  | 201.5  | 128.8  | 149.1  | 0.561027453 | 138.1    | 153.925  | 15.825  | 0.89719019  | 0.4919   | 1.128  |
| 103367_at   | 6.8    | 13.3   | 38.7   | 11.8   | 10.7   | 13.6   | 48.1   | 11.2   | 0.78865426  | 17.65    | 20.9     | 3.25    | 0.844497608 | 0.763    | 1.175  |
| 103369_at   | 222.5  | 290    | 316.5  | 363.1  | 183.3  | 198.2  | 218.5  | 255.5  | 0.057015926 | 298.025  | 213.875  | 84.15   | 1.39345412  | 0.04168  | -1.383 |
| 103370_at   | 1348.4 | 1668.1 | 1629.1 | 1475.5 | 1728.6 | 1509.4 | 1814   | 1455.2 | 0.426886382 | 1530.275 | 1626.8   | 96.525  | 0.940665724 | 0.4327   | 1.062  |
| 103371_at   | 1733.6 | 1515.2 | 1717.1 | 1788.6 | 1464.2 | 1879   | 2032.1 | 2261.2 | 0.287670036 | 1688.625 | 1909.125 | 220.5   | 0.884502062 | 0.3017   | 1.119  |
| 103372_at   | 18.9   | 10.9   | 7.5    | 11.6   | 8.2    | 14.7   | 11     | 11.1   | 0.7377156   | 12.225   | 11.25    | 0.975   | 1.086666667 | 0.8358   | -1.049 |
| 103374_at   | 76.2   | 28.5   | 41     | 49.9   | 20.9   | 36.2   | 46.4   | 28.6   | 0.229852284 | 48.9     | 33.025   | 15.875  | 1.480696442 | 0.2126   | -1.45  |
| 103375_at   | 213.3  | 241    | 414.2  | 372.2  | 313.4  | 235.3  | 347.2  | 358.8  | 0.953023334 | 310.175  | 313.675  | 3.5     | 0.988841954 | 0.8509   | 1.038  |
| 103376_s_at | 103.5  | 107.9  | 105.8  | 106.1  | 130.4  | 26.1   | 90.3   | 142.2  | 0.764943893 | 105.825  | 97.25    | 8.575   | 1.088174807 | 0.5261   | -1.301 |
| 103377_at   | 72.9   | 57.8   | 79.1   | 85.5   | 66     | 103.5  | 67     | 86.2   | 0.549346377 | 73.825   | 80.675   | 6.85    | 0.915091416 | 0.5753   | 1.085  |
| 103378_at   | 36.9   | 17.9   | 14.9   | 26.8   | 7.9    | 26.4   | 35.2   | 18.9   | 0.799453378 | 24.125   | 22.1     | 2.025   | 1.091628959 | 0.6931   | -1.171 |
| 103379_at   | 619.9  | 646.2  | 715.5  | 735.5  | 731.5  | 605.5  | 726.5  | 755    | 0.581672659 | 679.275  | 704.625  | 25.35   | 0.964023417 | 0.6025   | 1.036  |
| 103381_at   | 1406   | 1459.3 | 1607.5 | 1766.5 | 1382.1 | 1455.1 | 1475.4 | 1715.7 | 0.64468464  | 1559.825 | 1507.075 | 52.75   | 1.035001576 | 0.6433   | 1.034  |
| 103384_at   | 11.6   | 48.5   | 31.4   | 30.5   | 8.3    | 30.4   | 6.3    | 31.1   | 0.301485511 | 30.5     | 19.025   | 11.475  | 1.603153745 | 0.2933   | -1.82  |
| 103385_at   | 954.9  | 964.7  | 907.7  | 1090.2 | 609.8  | 709.3  | 746.3  | 802.8  | 0.003477321 | 979.375  | 717.05   | 262.325 | 1.365839202 | 0.004131 | -1.37  |
| 103386_at   | 147.4  | 87.7   | 167.5  | 129    | 145.4  | 135    | 194    | 100.2  | 0.691272813 | 132.9    | 143.65   | 10.75   | 0.925165332 | 0.7034   | 1.081  |
| 103387_at   | 605.7  | 358.3  | 474.1  | 455.3  | 390.5  | 565.8  | 421.6  | 471.7  | 0.869585602 | 473.35   | 462.4    | 10.95   | 1.023680796 | 0.9087   | -1.016 |
| 103388_at   | 881.1  | 499    | 733.8  | 488.7  | 625.5  | 872    | 624    | 494.1  | 0.979943867 | 650.65   | 653.9    | 3.25    | 0.995029821 | 0.9343   | 1.016  |
| 103389_at   | 244.4  | 371    | 275.5  | 336.6  | 194.3  | 187.3  | 189.9  | 147.6  | 0.015617425 | 306.875  | 179.775  | 127.1   | 1.706994855 | 0.00362  | -1.695 |
| 103391_at   | 162.4  | 151.1  | 153.7  | 154.2  | 213.4  | 154.8  | 192.3  | 197.2  | 0.068149824 | 155.35   | 189.425  | 34.075  | 0.820113501 | 0.03452  | 1.211  |
| 103392_at   | 1666.4 | 1569.7 | 1573.7 | 1729.9 | 1219.6 | 833.7  | 1391.5 | 1178.1 | 0.020961622 | 1634.925 | 1155.725 | 479.2   | 1.414631508 | 0.0175   | -1.438 |
| 103393_at   | 323.7  | 257.1  | 354.3  | 430.8  | 330.1  | 352.2  | 411.6  | 393.5  | 0.491331027 | 341.475  | 371.85   | 30.375  | 0.918313836 | 0.4378   | 1.103  |
| 103394_at   | 235    | 251.4  | 202.2  | 280.8  | 348.4  | 232.8  | 178.6  | 196.6  | 0.941293241 | 242.35   | 239.1    | 3.25    | 1.013592639 | 0.8092   | -1.042 |
| 103395_at   | 18.6   | 29.4   | 16.8   | 12.1   | 13.5   | 33     | 12.6   | 13.4   | 0.864755763 | 19.225   | 18.125   | 1.1     | 1.060689655 | 0.75     | -1.103 |
| 103397_at   | 424.3  | 384    | 476.5  | 439.5  | 478.2  | 397.1  | 528.3  | 558.7  | 0.203135376 | 431.075  | 490.575  | 59.5    | 0.878713754 | 0.2051   | 1.132  |
| 103398_at   | 400.2  | 250.1  | 231.9  | 333    | 228.2  | 342.7  | 270.5  | 314.9  | 0.763293911 | 303.8    | 289.075  | 14.725  | 1.050938338 | 0.8189   | -1.038 |
| 103399_at   | 532.8  | 489.9  | 677.6  | 800    | 503.9  | 483.9  | 486.5  | 515.7  | 0.169026199 | 625.075  | 497.5    | 127.575 | 1.256432161 | 0.1133   | -1.233 |
| 103400_at   | 938.3  | 1041.4 | 1088.9 | 1303   | 1173.6 | 1060.9 | 1319.2 | 1354.6 | 0.238880758 | 1092.9   | 1227.075 | 134.175 | 0.890654605 | 0.231    | 1.125  |
| 103401_at   | 157.2  | 301.2  | 352.1  | 335.9  | 198.2  | 297.1  | 282.6  | 279.8  | 0.676695951 | 286.6    | 264.425  | 22.175  | 1.083861208 | 0.8327   | -1.047 |
| 103402_at   | 606.6  | 541    | 869.2  | 1026.5 | 715.6  | 694.6  | 994.1  | 1190.5 | 0.43355273  | 760.825  | 898.7    | 137.875 | 0.846583955 | 0.4147   | 1.191  |
| 103403_at   | 113.4  | 144.2  | 134.5  | 101.1  | 125.8  | 129.2  | 107.3  | 21.6   | 0.371774647 | 123.3    | 95.975   | 27.325  | 1.28470956  | 0.3509   | -1.558 |
| 103404_at   | 590.9  | 531.5  | 833.2  | 952.4  | 606.7  | 730    | 651.8  | 738.5  | 0.689493298 | 727      | 681.75   | 45.25   | 1.066373304 | 0.7982   | -1.04  |
| 103405_at   | 172.6  | 254.9  | 293.9  | 360.9  | 232.6  | 177.6  | 345    | 291.5  | 0.873280489 | 270.575  | 261.675  | 8.9     | 1.034011656 | 0.8956   | 1.029  |
| 103406_at   | 1277.6 | 1186.3 | 1074   | 993.2  | 1427.4 | 1163.7 | 1187.1 | 1163.2 | 0.295898088 | 1132.775 | 1235.35  | 102.575 | 0.916966851 | 0.2838   | 1.091  |
| 103407_at   | 11.8   | 6.9    | 5.8    | 9.3    | 17.8   | 10.5   | 2.7    | 6.8    | 0.787697149 | 8.45     | 9.45     | 1       | 0.894179894 | 0.893    | -1.062 |
| 103408_at   | 106.6  | 145.3  | 146.6  | 152.4  | 118.4  | 190.2  | 147.1  | 165    | 0.383729826 | 137.725  | 155.175  | 17.45   | 0.887546319 | 0.4123   | 1.121  |
| 103409_at   | 86.8   | 118.1  | 80.5   | 116.2  | 108.6  | 86.3   | 118.9  | 119.9  | 0.545697644 | 100.4    | 108.425  | 8.025   | 0.925985704 | 0.5324   | 1.086  |
| 103411_at   | 91     | 86.1   | 335.5  | 137    | 216.8  | 87.8   | 163.7  | 148    | 0.903345114 | 162.4    | 154.075  | 8.325   | 1.054032127 | 0.872    | 1.064  |
| 103412_at   | 105    | 122.4  | 130.2  | 168.8  | 107.2  | 74.7   | 131.4  | 164.6  | 0.623326348 | 131.6    | 119.475  | 12.125  | 1.101485666 | 0.5534   | -1.13  |
| 103413_at   | 630.6  | 539.3  | 628.3  | 536.2  | 575.7  | 546.7  | 636.6  | 534.7  | 0.780741243 | 583.6    | 573.425  | 10.175  | 1.017744256 | 0.7887   | 1.017  |
| 103414_at   | 311.4  | 346.8  | 382.4  | 418.2  | 381.6  | 366.8  | 346.1  | 455.7  | 0.516097619 | 364.7    | 387.55   | 22.85   | 0.941039866 | 0.5064   | 1.063  |
| 103415_at   | 384.3  | 469.4  | 488.8  | 588.6  | 500.1  | 388.5  | 527.1  | 566.9  | 0.828184804 | 482.775  | 495.65   | 12.875  | 0.974024009 | 0.8237   | 1.028  |
| 103416_at   | 2625.9 | 2087.1 | 2444.7 | 2395.1 | 2011   | 2049.4 | 2184.6 | 2218.8 | 0.088161216 | 2388.2   | 2115.95  | 272.25  | 1.128665611 | 0.06937  | -1.126 |
| 103418_at   | 723.9  | 907.8  | 668.7  | 885.3  | 774.6  | 715.5  | 787.1  | 828.4  | 0.768637154 | 796.425  | 776.4    | 20.025  | 1.025792117 | 0.8268   | 1.019  |
| 103420_at   | 1169.9 | 1015.5 | 1178.4 | 1010.6 | 1044.3 | 1136.3 | 900.7  | 1122.8 | 0.572910193 | 1093.6   | 1051.025 | 42.575  | 1.040508075 | 0.5694   | -1.042 |
| 103421_at   | 116.1  | 118.4  | 118.6  | 149.8  | 200    | 141.7  | 143.8  | 176.2  | 0.059179714 | 125.725  | 165.425  | 39.7    | 0.76001209  | 0.0395   | 1.31   |



|             |        |        |        |        |        |        |        |        |             |          |          |         |             |          |        |
|-------------|--------|--------|--------|--------|--------|--------|--------|--------|-------------|----------|----------|---------|-------------|----------|--------|
| 103422_at   | 185.3  | 204.6  | 253.3  | 275.5  | 429.9  | 370    | 378.9  | 388.8  | 0.001178269 | 229.675  | 391.9    | 162.225 | 0.586055116 | 0.001407 | 1.725  |
| 103423_at   | 736.5  | 619.9  | 607.6  | 702.2  | 763    | 876.4  | 674.1  | 694.7  | 0.179578849 | 666.55   | 752.05   | 85.5    | 0.886310751 | 0.1668   | 1.126  |
| 103424_at   | 197.5  | 213.6  | 286.4  | 294.5  | 142.9  | 208.1  | 175.6  | 122.9  | 0.035557289 | 248      | 162.375  | 85.625  | 1.527328714 | 0.03185  | -1.534 |
| 103427_at   | 218.7  | 204.9  | 233.1  | 326.9  | 232    | 254.8  | 269.7  | 261.1  | 0.784232729 | 245.9    | 254.4    | 8.5     | 0.96658805  | 0.6653   | 1.051  |
| 103428_at   | 814    | 579.8  | 760.5  | 812.5  | 576.7  | 793.4  | 945.2  | 669.3  | 0.965131142 | 741.7    | 746.15   | 4.45    | 0.994036052 | 0.9893   | 1.002  |
| 103429_i_at | 145.1  | 183.2  | 260.4  | 237.5  | 174.5  | 180.4  | 213.3  | 237.4  | 0.870684438 | 206.55   | 201.4    | 5.15    | 1.025571003 | 0.9614   | -1.008 |
| 103430_at   | 67.9   | 70.1   | 87.1   | 156.6  | 80.8   | 37.7   | 129.9  | 121.5  | 0.92413407  | 95.425   | 92.475   | 2.95    | 1.031900514 | 0.8347   | -1.078 |
| 103432_at   | 22.7   | 68.2   | 13.2   | 11.5   | 66.5   | 81.8   | 12     | 14.4   | 0.534134339 | 28.9     | 43.675   | 14.775  | 0.661705781 | 0.6079   | 1.416  |
| 103433_at   | 1132.9 | 1390.5 | 1407.5 | 1226.6 | 1091.3 | 1027.9 | 1158.9 | 1229.6 | 0.093515054 | 1289.375 | 1126.925 | 162.45  | 1.144153338 | 0.08622  | -1.142 |
| 103434_at   | 354.5  | 252.2  | 384.8  | 255.1  | 120.9  | 304    | 389.7  | 276    | 0.578311762 | 311.65   | 272.65   | 39      | 1.143040528 | 0.4979   | -1.221 |
| 103435_at   | 909.2  | 1068.3 | 1139.5 | 1441.8 | 1249.3 | 748.5  | 1285.3 | 1419   | 0.852917599 | 1139.7   | 1175.525 | 35.825  | 0.969524255 | 0.9265   | 1.017  |
| 103436_at   | 456.6  | 405.3  | 645.8  | 486.8  | 344.6  | 446.6  | 401    | 424.3  | 0.167886624 | 498.625  | 404.125  | 94.5    | 1.23383854  | 0.1295   | -1.221 |
| 103437_at   | 34.1   | 104.7  | 114.2  | 69.4   | 83.6   | 104.7  | 73     | 78     | 0.839742769 | 80.6     | 84.825   | 4.225   | 0.950191571 | 0.6386   | 1.152  |
| 103438_at   | 98     | 84.5   | 54.7   | 43.2   | 102.1  | 75.4   | 45.9   | 58.7   | 0.981510635 | 70.1     | 70.525   | 0.425   | 0.993973768 | 0.9574   | 1.014  |
| 103439_at   | 678.7  | 607.1  | 708    | 700.4  | 589.1  | 853    | 637.5  | 653    | 0.885713425 | 673.55   | 683.15   | 9.6     | 0.985947449 | 0.9489   | 1.006  |
| 103440_at   | 472.1  | 598.9  | 842.1  | 855.8  | 775    | 533    | 880.1  | 664.9  | 0.867000837 | 692.225  | 713.25   | 21.025  | 0.970522257 | 0.8202   | 1.044  |
| 103441_at   | 324    | 401.4  | 428    | 467.2  | 500.9  | 414.1  | 458.5  | 457.2  | 0.196078669 | 405.15   | 457.675  | 52.525  | 0.885235156 | 0.1908   | 1.137  |
| 103442_at   | 959    | 975.5  | 770.6  | 685.9  | 813    | 938.7  | 629    | 716.5  | 0.479420265 | 847.75   | 774.3    | 73.45   | 1.094859873 | 0.4823   | -1.095 |
| 103443_at   | 110.3  | 128.2  | 180.2  | 213.4  | 156.7  | 216.6  | 120.6  | 166.4  | 0.827127213 | 158.025  | 165.075  | 7.05    | 0.95729214  | 0.7808   | 1.058  |
| 103444_at   | 160.4  | 102.5  | 164.2  | 143.3  | 182.9  | 146    | 174.4  | 181.2  | 0.145380859 | 142.6    | 171.125  | 28.525  | 0.833308985 | 0.1574   | 1.215  |
| 103445_at   | 167    | 111.9  | 174.2  | 115.4  | 114.9  | 242.3  | 140.8  | 189.8  | 0.403705143 | 142.125  | 171.95   | 29.825  | 0.826548415 | 0.4303   | 1.186  |
| 103446_at   | 139.2  | 92.2   | 97     | 110.1  | 141.6  | 144.7  | 91.9   | 145.4  | 0.253435913 | 109.625  | 130.9    | 21.275  | 0.837471352 | 0.2786   | 1.189  |
| 103447_at   | 917.3  | 556.9  | 565.1  | 729.6  | 645.7  | 701.3  | 604.3  | 481.3  | 0.428053342 | 692.225  | 608.15   | 84.075  | 1.138247143 | 0.4447   | -1.125 |
| 103448_at   | 620.1  | 1294.3 | 853.3  | 649.6  | 1830.2 | 872.8  | 514.3  | 734.4  | 0.703202902 | 854.325  | 987.925  | 133.6   | 0.864767062 | 0.8178   | 1.079  |
| 103449_at   | 503.8  | 475.6  | 726.1  | 787.5  | 534    | 375.7  | 620.5  | 730.7  | 0.611676406 | 623.25   | 565.225  | 58.025  | 1.102658233 | 0.6101   | -1.108 |
| 103450_at   | 220.8  | 204.4  | 208    | 269.8  | 212.4  | 240.6  | 189.7  | 204.8  | 0.484432999 | 225.75   | 211.875  | 13.875  | 1.065486726 | 0.4796   | -1.063 |
| 103451_at   | 181.7  | 129.2  | 156.2  | 184.5  | 255.4  | 219.1  | 203.1  | 231.8  | 0.00944653  | 162.9    | 227.35   | 64.45   | 0.716516384 | 0.01218  | 1.405  |
| 103452_at   | 22.6   | 34.6   | 9.9    | 38.1   | 23.6   | 21.1   | 24.4   | 18.3   | 0.541312374 | 26.3     | 21.85    | 4.45    | 1.203661327 | 0.8309   | -1.073 |
| 103454_at   | 59.6   | 61.7   | 71.9   | 74.4   | 89.8   | 61.5   | 57.8   | 41.7   | 0.714606813 | 66.9     | 62.7     | 4.2     | 1.066985646 | 0.5805   | -1.102 |
| 103455_at   | 78.2   | 69     | 59.6   | 98     | 67.3   | 83.3   | 73     | 81.9   | 0.985421847 | 76.2     | 76.375   | 0.175   | 0.997708674 | 0.8997   | 1.015  |
| 103456_at   | 1113.2 | 929.1  | 1183.7 | 1098.2 | 1016.9 | 913    | 1030.7 | 789.4  | 0.114309957 | 1081.05  | 937.5    | 143.55  | 1.15312     | 0.124    | -1.155 |
| 103457_at   | 1997.6 | 1909   | 1471.8 | 1664.9 | 1934.7 | 1953.8 | 2064.3 | 2089.4 | 0.124560379 | 1760.825 | 2010.55  | 249.725 | 0.875792694 | 0.101    | 1.149  |
| 103458_at   | 51.4   | 28.6   | 27     | 54.1   | 37     | 66.7   | 23.2   | 27.2   | 0.89105819  | 40.275   | 38.525   | 1.75    | 1.045425049 | 0.7973   | -1.083 |
| 103459_at   | 681.4  | 750.3  | 1035.4 | 1145.9 | 847.8  | 483.8  | 828.7  | 863.9  | 0.347216802 | 903.25   | 756.05   | 147.2   | 1.194696118 | 0.3713   | -1.199 |
| 103460_at   | 827.8  | 897.8  | 1449.1 | 1504.6 | 805.2  | 936.1  | 1174.1 | 804.9  | 0.288197272 | 1169.825 | 930.075  | 239.75  | 1.257774911 | 0.2973   | -1.228 |
| 103462_at   | 39.4   | 36.4   | 35.6   | 45.7   | 48.5   | 35.2   | 42.3   | 28.8   | 0.910642891 | 39.275   | 38.7     | 0.575   | 1.014857881 | 0.8256   | 1.03   |
| 103463_at   | 22.8   | 21.8   | 14.3   | 15.5   | 7.8    | 13.3   | 2.3    | 15.4   | 0.054192919 | 18.6     | 9.7      | 8.9     | 1.917525773 | 0.105    | -2.336 |
| 103465_f_at | 73.9   | 122.7  | 114.1  | 106.4  | 119.4  | 132.3  | 82     | 175.3  | 0.347175095 | 104.275  | 127.25   | 22.975  | 0.819449902 | 0.385    | 1.198  |
| 103466_at   | 495.1  | 427    | 331.4  | 326.8  | 362.6  | 410.3  | 265    | 340    | 0.358985565 | 395.075  | 344.475  | 50.6    | 1.146890195 | 0.3653   | -1.143 |
| 103467_g_at | 542.3  | 583.9  | 452.6  | 471.6  | 644    | 491.5  | 424.3  | 558    | 0.775380451 | 512.6    | 529.45   | 16.85   | 0.968174521 | 0.8174   | 1.026  |
| 103468_at   | 238.9  | 366.1  | 419.3  | 326.6  | 569.9  | 448.7  | 504.9  | 358.8  | 0.065442765 | 337.725  | 470.575  | 132.85  | 0.71768581  | 0.0723   | 1.402  |
| 103469_at   | 30.7   | 37.3   | 4.4    | 22     | 35.9   | 48.8   | 29.6   | 22     | 0.295927625 | 23.6     | 34.075   | 10.475  | 0.692589875 | 0.3007   | 1.787  |
| 103470_at   | 18.6   | 9.9    | 5.3    | 11.3   | 9.4    | 15.4   | 7.1    | 20.4   | 0.674464535 | 11.275   | 13.075   | 1.8     | 0.862332696 | 0.6613   | 1.175  |
| 103471_at   | 614    | 680.5  | 784    | 865    | 742.7  | 762.6  | 1001.8 | 763.7  | 0.361892071 | 735.875  | 817.7    | 81.825  | 0.899932738 | 0.3447   | 1.112  |
| 103472_at   | 2.9    | 1.3    | 1.9    | 2      | 2.6    | 2.7    | 2.8    | 4      | 0.075066145 | 2.025    | 3.025    | 1       | 0.669421488 | 0.06656  | 1.549  |
| 103473_at   | 218.7  | 193.1  | 232    | 223.2  | 179.6  | 225.9  | 201.1  | 217.1  | 0.443262379 | 216.75   | 205.925  | 10.825  | 1.052567682 | 0.4455   | -1.054 |
| 103475_s_at | 130.7  | 106.3  | 181.3  | 189.3  | 123.8  | 134.3  | 214.4  | 177.9  | 0.723852368 | 151.9    | 162.6    | 10.7    | 0.934194342 | 0.7158   | 1.074  |
| 103476_at   | 117.1  | 83.9   | 92.3   | 86.8   | 90.4   | 118.3  | 90.7   | 110.8  | 0.495456648 | 95.025   | 102.55   | 7.525   | 0.92662116  | 0.4746   | 1.081  |
| 103477_at   | 50.2   | 43.5   | 34.7   | 12.9   | 33.8   | 17.7   | 8.9    | 15.8   | 0.151869726 | 35.325   | 19.05    | 16.275  | 1.854330709 | 0.1862   | -1.849 |
| 103478_at   | 190.4  | 117.9  | 146.4  | 136.3  | 62     | 203.7  | 164.2  | 104.8  | 0.706023838 | 147.75   | 133.675  | 14.075  | 1.105292687 | 0.5445   | -1.198 |
| 103479_at   | 408.1  | 418.5  | 366    | 355.7  | 359.9  | 426.5  | 313.6  | 355    | 0.441255601 | 387.075  | 363.75   | 23.325  | 1.064123711 | 0.4121   | -1.068 |
| 103480_at   | 96     | 97.4   | 87.6   | 171.3  | 141.4  | 61.4   | 103.2  | 160.3  | 0.908977424 | 113.075  | 116.575  | 3.5     | 0.96997641  | 0.9834   | 1.006  |
| 103481_at   | 869.9  | 832.2  | 815.5  | 778.7  | 863    | 816.8  | 1048.7 | 955.9  | 0.155190112 | 824.075  | 921.1    | 97.025  | 0.894663989 | 0.1232   | 1.113  |
| 103483_at   | 315.6  | 265.4  | 265.2  | 274.2  | 394.2  | 285.3  | 335.4  | 319.3  | 0.097896139 | 280.1    | 333.55   | 53.45   | 0.83975416  | 0.0741   | 1.186  |
| 103484_at   | 42.1   | 29.3   | 35.4   | 34.9   | 54.6   | 53.7   | 22.6   | 45.5   | 0.337948981 | 35.425   | 44.1     | 8.675   | 0.803287982 | 0.4688   | 1.186  |
| 103485_at   | 272.1  | 221    | 447.5  | 375    | 290.7  | 330.6  | 246.3  | 311.3  | 0.563332787 | 328.9    | 294.725  | 34.175  | 1.115955552 | 0.6616   | -1.082 |



|             |        |        |        |        |        |        |        |        |             |          |         |         |             |          |        |
|-------------|--------|--------|--------|--------|--------|--------|--------|--------|-------------|----------|---------|---------|-------------|----------|--------|
| 103486_at   | 15.5   | 13.2   | 10.6   | 10.7   | 13.3   | 13.3   | 14.9   | 14.7   | 0.284195539 | 12.5     | 14.05   | 1.55    | 0.889679715 | 0.2284   | 1.137  |
| 103487_at   | 495.2  | 620.1  | 636.6  | 570.5  | 467.6  | 702.4  | 408.8  | 613.7  | 0.68286252  | 580.6    | 548.125 | 32.475  | 1.059247434 | 0.5982   | -1.079 |
| 103488_at   | 266.7  | 193.1  | 192.1  | 161.1  | 215    | 295    | 222.7  | 246.5  | 0.200932185 | 203.25   | 244.8   | 41.55   | 0.830269608 | 0.1746   | 1.216  |
| 103489_at   | 138.3  | 71.7   | 74.7   | 86.6   | 101.7  | 155    | 89.1   | 86.9   | 0.515785949 | 92.825   | 108.175 | 15.35   | 0.8581003   | 0.4549   | 1.175  |
| 103490_at   | 15.7   | 13.4   | 7.5    | 13.2   | 21.9   | 15.9   | 35.9   | 32.9   | 0.049313215 | 12.45    | 26.65   | 14.2    | 0.467166979 | 0.02396  | 2.105  |
| 103491_at   | 188.1  | 163.3  | 205    | 295.5  | 125.5  | 204.7  | 293.9  | 239.1  | 0.952622476 | 212.975  | 215.8   | 2.825   | 0.986909175 | 0.9732   | 1.008  |
| 103492_at   | 494    | 497.9  | 503    | 472.8  | 481.3  | 427    | 492.4  | 601.5  | 0.830504996 | 491.925  | 500.55  | 8.625   | 0.982768954 | 0.8951   | 1.01   |
| 103493_at   | 90.7   | 152.1  | 86.3   | 85.5   | 147.4  | 100.4  | 99.8   | 109.9  | 0.608336315 | 103.65   | 114.375 | 10.725  | 0.906229508 | 0.5093   | 1.124  |
| 103494_at   | 70.2   | 100    | 91     | 130.8  | 99.8   | 94.4   | 48.1   | 78.1   | 0.3366146   | 98       | 80.1    | 17.9    | 1.223470662 | 0.3451   | -1.24  |
| 103495_at   | 10.6   | 20.4   | 10.1   | 17     | 8.2    | 36.4   | 15.6   | 22.4   | 0.399251094 | 14.525   | 20.65   | 6.125   | 0.703389831 | 0.4982   | 1.296  |
| 103496_at   | 56.3   | 28     | 43.5   | 39.1   | 23.7   | 46.5   | 38     | 29.2   | 0.376076437 | 41.725   | 34.35   | 7.375   | 1.214701601 | 0.3806   | -1.216 |
| 103497_at   | 176.5  | 227.6  | 198.6  | 199.5  | 261.4  | 197.7  | 214    | 216.9  | 0.251870546 | 200.55   | 222.5   | 21.95   | 0.901348315 | 0.2408   | 1.108  |
| 103498_at   | 131.1  | 150.5  | 127.1  | 128.4  | 84.6   | 177.4  | 158.7  | 109.4  | 0.941478517 | 134.275  | 132.525 | 1.75    | 1.013205056 | 0.7724   | -1.054 |
| 103499_at   | 55.9   | 123.3  | 112.2  | 141.3  | 118.6  | 102.6  | 149.3  | 189.6  | 0.276064396 | 108.175  | 140.025 | 31.85   | 0.772540618 | 0.289    | 1.332  |
| 103500_at   | 287.3  | 288.6  | 338.5  | 347.1  | 342.4  | 316.9  | 352.4  | 364.7  | 0.18782257  | 315.375  | 344.1   | 28.725  | 0.91652136  | 0.1784   | 1.094  |
| 103501_at   | 689.2  | 639.1  | 778.2  | 640.9  | 576.7  | 574.4  | 539.6  | 591.5  | 0.031620191 | 686.85   | 570.55  | 116.3   | 1.203838402 | 0.01072  | -1.201 |
| 103502_at   | 680    | 603.5  | 802.8  | 632.9  | 713    | 935.5  | 1052.4 | 695.9  | 0.150029544 | 679.8    | 849.2   | 169.4   | 0.800518135 | 0.1253   | 1.237  |
| 103503_at   | 197.8  | 202.1  | 181.1  | 217.6  | 142.3  | 107.9  | 87.7   | 127.6  | 0.001862229 | 199.65   | 116.375 | 83.275  | 1.715574651 | 0.002595 | -1.74  |
| 103504_at   | 1212.5 | 1544.1 | 1607.1 | 1362.8 | 1765.9 | 1472.1 | 1614.4 | 1569.6 | 0.166418442 | 1431.625 | 1605.5  | 173.875 | 0.891700405 | 0.1614   | 1.126  |
| 103506_f_at | 70.4   | 66.9   | 53.9   | 85.2   | 127.7  | 119    | 97.2   | 104.7  | 0.003850237 | 69.1     | 112.15  | 43.05   | 0.616139099 | 0.004689 | 1.635  |
| 103507_at   | 43.6   | 38.5   | 14.7   | 20     | 72.4   | 77.6   | 96.3   | 16.5   | 0.121124911 | 29.2     | 65.7    | 36.5    | 0.444444444 | 0.1833   | 2.06   |
| 103508_at   | 192.6  | 120.2  | 137    | 219.5  | 118.8  | 164.3  | 125.8  | 163    | 0.399835172 | 167.325  | 142.975 | 24.35   | 1.170309495 | 0.4332   | -1.149 |
| 103509_at   | 3.5    | 2.9    | 2.6    | 3.5    | 3.5    | 5      | 2.7    | 2.8    | 0.550452813 | 3.125    | 3.5     | 0.375   | 0.892857143 | 0.5758   | 1.096  |
| 103510_at   | 55.7   | 28.5   | 41.6   | 72.2   | 64.6   | 72.7   | 102.1  | 64     | 0.088837046 | 49.5     | 75.85   | 26.35   | 0.652603823 | 0.08682  | 1.593  |
| 103511_at   | 499.1  | 491.1  | 715.6  | 749.1  | 480.7  | 461.6  | 458.1  | 490    | 0.13220017  | 613.725  | 472.6   | 141.125 | 1.29861405  | 0.07862  | -1.274 |
| 103512_at   | 432.4  | 301.4  | 244.2  | 283.9  | 202.4  | 350.4  | 259    | 199.7  | 0.290506871 | 315.475  | 252.875 | 62.6    | 1.247553139 | 0.255    | -1.253 |
| 103513_at   | 139.1  | 168.8  | 156.8  | 181.2  | 148.1  | 140.4  | 120.9  | 127.5  | 0.051280042 | 161.475  | 134.225 | 27.25   | 1.203017322 | 0.04533  | -1.201 |
| 103514_at   | 81.5   | 70.7   | 121.3  | 118.7  | 109.6  | 94.1   | 94.3   | 100.5  | 0.912769286 | 98.05    | 99.625  | 1.575   | 0.984190715 | 0.7786   | 1.042  |
| 103515_at   | 640.7  | 542.2  | 693.7  | 665.1  | 630.9  | 450.1  | 549.1  | 577.2  | 0.147917018 | 635.425  | 551.825 | 83.6    | 1.151497304 | 0.1584   | -1.155 |
| 103516_at   | 29.2   | 29.4   | 61.9   | 58.7   | 68.4   | 41.9   | 65.7   | 72.1   | 0.181032178 | 44.8     | 62.025  | 17.225  | 0.722289399 | 0.1814   | 1.444  |
| 103517_at   | 65.4   | 21.5   | 27.8   | 64.9   | 62.4   | 84.3   | 48.2   | 39.7   | 0.40390449  | 44.9     | 58.65   | 13.75   | 0.765558397 | 0.338    | 1.411  |
| 103518_at   | 71     | 43.1   | 74.8   | 65.3   | 78.5   | 81.1   | 70.5   | 82.6   | 0.128888593 | 63.55    | 78.175  | 14.625  | 0.812919731 | 0.1325   | 1.255  |
| 103519_at   | 34.8   | 20.2   | 20.1   | 14.3   | 21.4   | 39     | 16     | 7      | 0.859031126 | 22.35    | 20.85   | 1.5     | 1.071942446 | 0.6522   | -1.209 |
| 103520_at   | 36     | 55.7   | 71     | 73.4   | 66     | 62.3   | 64.6   | 78.5   | 0.398365975 | 59.025   | 67.85   | 8.825   | 0.869933677 | 0.354    | 1.189  |
| 103521_r_at | 25.1   | 21.7   | 37.5   | 25     | 34     | 37.6   | 23.7   | 12.6   | 0.959851695 | 27.325   | 26.975  | 0.35    | 1.012974977 | 0.7938   | -1.078 |
| 103522_at   | 37.2   | 5.3    | 24.8   | 36     | 2.7    | 28.1   | 29.9   | 36.8   | 0.894716572 | 25.825   | 24.375  | 1.45    | 1.059487179 | 0.8213   | -1.198 |
| 103523_at   | 169.2  | 128.1  | 185.2  | 197.2  | 173.7  | 251.1  | 200.7  | 174    | 0.253701854 | 169.925  | 199.875 | 29.95   | 0.850156348 | 0.2513   | 1.178  |
| 103524_at   | 530.7  | 508.2  | 474    | 633.2  | 441.1  | 422.7  | 427    | 506.5  | 0.080642667 | 536.525  | 449.325 | 87.2    | 1.194068881 | 0.05817  | -1.19  |
| 103525_at   | 736.8  | 1097.7 | 1164.6 | 1320.1 | 941.9  | 967.6  | 921.8  | 853.7  | 0.290960062 | 1079.8   | 921.25  | 158.55  | 1.172103121 | 0.3266   | -1.148 |
| 103526_at   | 351.8  | 344.7  | 424.7  | 400.5  | 392.2  | 514.8  | 277.3  | 387.3  | 0.823120577 | 380.425  | 392.9   | 12.475  | 0.968248918 | 0.9294   | 1.013  |
| 103527_at   | 102.5  | 103.2  | 60     | 77.2   | 91.2   | 91.1   | 79     | 51.9   | 0.614971295 | 85.725   | 78.3    | 7.425   | 1.094827586 | 0.6422   | -1.095 |
| 103529_at   | 142.1  | 173.1  | 122.5  | 111.5  | 137.8  | 148.3  | 146.6  | 128.9  | 0.839154056 | 137.3    | 140.4   | 3.1     | 0.977920228 | 0.7418   | 1.036  |
| 103530_at   | 157.8  | 123.1  | 171.6  | 205.8  | 173.2  | 188.4  | 138.4  | 222.4  | 0.53609781  | 164.575  | 180.6   | 16.025  | 0.911267996 | 0.5365   | 1.1    |
| 103531_f_at | 145.9  | 184.6  | 215.3  | 216.7  | 206.3  | 203.1  | 268.2  | 273    | 0.113383919 | 190.625  | 237.65  | 47.025  | 0.802124974 | 0.1194   | 1.25   |
| 103532_at   | 13.3   | 2.2    | 1.1    | 0.7    | 17.4   | 14.6   | 8      | 0.7    | 0.26935912  | 4.325    | 10.175  | 5.85    | 0.425061425 | 0.352    | 2.724  |
| 103533_at   | 48     | 46.5   | 35.6   | 40.2   | 82.8   | 57.5   | 67.2   | 39.2   | 0.124644418 | 42.575   | 61.675  | 19.1    | 0.69031212  | 0.09444  | 1.408  |
| 103534_at   | 4405.4 | 7018.3 | 5170.9 | 3890.8 | 6152.7 | 6094   | 3354.5 | 3984   | 0.828373837 | 5121.35  | 4896.3  | 225.05  | 1.045963278 | 0.7951   | -1.056 |
| 103535_at   | 44.9   | 42.2   | 34.3   | 40.2   | 45.6   | 60.3   | 17.5   | 26     | 0.776531098 | 40.4     | 37.35   | 3.05    | 1.081659973 | 0.5411   | -1.202 |
| 103536_at   | 50.3   | 45.1   | 40.1   | 43.2   | 57     | 65     | 21.9   | 46.8   | 0.773438212 | 44.675   | 47.675  | 3       | 0.937073938 | 0.975    | 1.008  |
| 103537_at   | 101.7  | 105.8  | 142.9  | 195.7  | 147    | 125.9  | 156.8  | 223.4  | 0.411349446 | 136.525  | 163.275 | 26.75   | 0.836165978 | 0.3622   | 1.212  |
| 103538_at   | 36.4   | 26.7   | 29.5   | 22.6   | 37     | 51     | 43.8   | 44.8   | 0.009369448 | 28.8     | 44.15   | 15.35   | 0.652321631 | 0.01062  | 1.546  |
| 103539_at   | 123.1  | 133.6  | 136.2  | 174.5  | 220.6  | 127.1  | 171.5  | 214.2  | 0.156520801 | 141.85   | 183.35  | 41.5    | 0.77365694  | 0.152    | 1.274  |
| 103540_at   | 188.9  | 105    | 112.3  | 90.6   | 101.4  | 185.3  | 96.2   | 135.2  | 0.865415326 | 124.2    | 129.525 | 5.325   | 0.958888246 | 0.8346   | 1.049  |
| 103541_at   | 43.2   | 77.3   | 59.8   | 74.4   | 55.2   | 87.8   | 87.8   | 66.6   | 0.380051504 | 63.675   | 74.35   | 10.675  | 0.856422327 | 0.3915   | 1.176  |
| 103542_at   | 252.3  | 273.2  | 438.8  | 394    | 333.4  | 323    | 401.6  | 435.9  | 0.5509348   | 339.575  | 373.475 | 33.9    | 0.909230872 | 0.4839   | 1.121  |
| 103543_at   | 40.9   | 63.4   | 47.7   | 48.1   | 51.4   | 65     | 30.9   | 60.4   | 0.839779629 | 50.025   | 51.925  | 1.9     | 0.963408763 | 0.9548   | 1.011  |



|             |        |        |        |        |        |        |        |        |             |          |          |         |             |         |        |
|-------------|--------|--------|--------|--------|--------|--------|--------|--------|-------------|----------|----------|---------|-------------|---------|--------|
| 103544_at   | 742.8  | 478.6  | 505.3  | 547    | 424.3  | 541.3  | 630.3  | 566    | 0.718752378 | 568.425  | 540.475  | 27.95   | 1.05171377  | 0.7364  | -1.047 |
| 103545_at   | 390.3  | 542.4  | 412.5  | 448.6  | 759.7  | 610    | 371.6  | 560.7  | 0.216751928 | 448.45   | 575.5    | 127.05  | 0.779235447 | 0.2229  | 1.253  |
| 103546_at   | 138.2  | 31.1   | 88.3   | 103.3  | 31     | 79.2   | 62.6   | 95.8   | 0.419463616 | 90.225   | 67.15    | 23.075  | 1.343633656 | 0.5694  | -1.278 |
| 103547_at   | 329    | 322.6  | 487.1  | 448.8  | 481.5  | 406.2  | 473.6  | 484.8  | 0.228094992 | 396.875  | 461.525  | 64.65   | 0.859920914 | 0.197   | 1.18   |
| 103548_at   | 79.8   | 69.9   | 20.9   | 80.5   | 90.6   | 140.4  | 88.9   | 87.9   | 0.086730802 | 62.775   | 101.95   | 39.175  | 0.615743011 | 0.1384  | 1.803  |
| 103549_at   | 713.6  | 687.9  | 845.2  | 652.8  | 673.6  | 718.3  | 706.5  | 546.3  | 0.311410979 | 724.875  | 661.175  | 63.7    | 1.096343631 | 0.3127  | -1.097 |
| 103550_at   | 4.3    | 27.3   | 15.1   | 17.4   | 4.4    | 2.9    | 41.8   | 27.4   | 0.781731022 | 16.025   | 19.125   | 3.1     | 0.837908497 | 0.8152  | -1.207 |
| 103551_at   | 240.9  | 253.7  | 260.8  | 352.7  | 314.2  | 328.8  | 305.9  | 413.5  | 0.124274102 | 277.025  | 340.6    | 63.575  | 0.813344099 | 0.1042  | 1.235  |
| 103552_at   | 184    | 196    | 217    | 160.1  | 208.6  | 150.9  | 220.4  | 221.7  | 0.609696479 | 189.275  | 200.4    | 11.125  | 0.944486028 | 0.6623  | 1.053  |
| 103553_at   | 180.4  | 133.3  | 145.6  | 228    | 151.3  | 173.4  | 176.7  | 122.9  | 0.550780718 | 171.825  | 156.075  | 15.75   | 1.100913023 | 0.5863  | -1.088 |
| 103554_at   | 176.5  | 227.7  | 326.3  | 293.5  | 205.9  | 200.9  | 373.8  | 300.7  | 0.797436537 | 256      | 270.325  | 14.325  | 0.947008231 | 0.8248  | 1.048  |
| 103555_at   | 3364.4 | 3559.3 | 3675.2 | 4342.6 | 3742.1 | 3426.8 | 3935.7 | 4234.5 | 0.727644405 | 3735.375 | 3834.775 | 99.4    | 0.974079314 | 0.7063  | 1.028  |
| 103556_at   | 2821.1 | 2924.1 | 2583.7 | 2196.5 | 2181.3 | 2920.5 | 2297.4 | 2618   | 0.603852802 | 2631.35  | 2504.3   | 127.05  | 1.05073274  | 0.6043  | -1.051 |
| 103557_at   | 380.2  | 346.8  | 467.6  | 420.6  | 326.5  | 405.1  | 327.3  | 380.1  | 0.229424247 | 403.8    | 359.75   | 44.05   | 1.122446143 | 0.2261  | -1.12  |
| 103558_at   | 104.9  | 37.6   | 36.7   | 49     | 49.7   | 116.1  | 26.9   | 44.2   | 0.934645721 | 57.05    | 59.225   | 2.175   | 0.963275644 | 0.9831  | 1.009  |
| 103559_at   | 694.1  | 454.9  | 954.1  | 794.4  | 546.3  | 600.1  | 554.2  | 420.5  | 0.160265893 | 724.375  | 530.275  | 194.1   | 1.366036491 | 0.1549  | -1.33  |
| 103560_at   | 318.3  | 370    | 444.3  | 474.8  | 402.5  | 379.3  | 450.8  | 448.6  | 0.663688138 | 401.85   | 420.3    | 18.45   | 0.956102784 | 0.6064  | 1.056  |
| 103562_f_at | 160    | 147    | 175.2  | 195    | 128.2  | 236.3  | 188    | 220.9  | 0.407532437 | 169.3    | 193.35   | 24.05   | 0.875614171 | 0.4829  | 1.118  |
| 103563_at   | 414.8  | 369    | 351.3  | 498.6  | 315    | 349.6  | 309.2  | 403    | 0.161385375 | 408.425  | 344.2    | 64.225  | 1.186592098 | 0.1408  | -1.182 |
| 103564_at   | 354.8  | 511.3  | 332    | 400    | 254.3  | 275.9  | 382.9  | 382.6  | 0.201329559 | 399.525  | 323.925  | 75.6    | 1.233387358 | 0.1883  | -1.238 |
| 103565_at   | 1138.6 | 1344.2 | 856.6  | 736.6  | 1109.7 | 964.1  | 895.8  | 863.5  | 0.702544023 | 1019     | 958.275  | 60.725  | 1.063369075 | 0.8013  | -1.039 |
| 103567_at   | 376.3  | 354.7  | 361.8  | 639.2  | 334.6  | 475.6  | 400    | 444.2  | 0.809133367 | 433      | 413.6    | 19.4    | 1.046905222 | 0.8956  | 1.022  |
| 103568_at   | 181.9  | 240.1  | 225.8  | 213.3  | 209.2  | 267.3  | 297.4  | 262.5  | 0.101696426 | 215.275  | 259.1    | 43.825  | 0.830856812 | 0.103   | 1.2    |
| 103569_at   | 131.2  | 170.6  | 157.4  | 169.1  | 99.7   | 145.6  | 192.3  | 149.2  | 0.645369588 | 157.075  | 146.7    | 10.375  | 1.070722563 | 0.5691  | -1.094 |
| 103570_at   | 1222.6 | 1438.3 | 1221.3 | 1435.8 | 1160.4 | 973.2  | 1405.5 | 1162.1 | 0.209542024 | 1329.5   | 1175.3   | 154.2   | 1.131200545 | 0.1966  | -1.137 |
| 103571_at   | 288.4  | 304.4  | 356.2  | 306.3  | 260.1  | 392.1  | 441.8  | 216.1  | 0.818554002 | 313.825  | 327.525  | 13.7    | 0.958171132 | 0.9823  | 1.004  |
| 103573_at   | 165.7  | 88.1   | 193.3  | 189    | 90     | 99.8   | 76.4   | 54.4   | 0.040699499 | 159.025  | 80.15    | 78.875  | 1.984092327 | 0.0267  | -1.944 |
| 103574_at   | 195.3  | 102.5  | 148.2  | 119.8  | 247.6  | 138.3  | 205.2  | 212.9  | 0.099765609 | 141.45   | 201      | 59.55   | 0.703731343 | 0.1028  | 1.432  |
| 103575_at   | 27.1   | 19.2   | 19.1   | 27.5   | 32.2   | 46.5   | 16.5   | 3      | 0.899412206 | 23.225   | 24.55    | 1.325   | 0.946028513 | 0.6167  | -1.382 |
| 103577_at   | 7      | 3      | 10.2   | 20.1   | 14.4   | 7.5    | 14.7   | 19.2   | 0.415092876 | 10.075   | 13.95    | 3.875   | 0.722222222 | 0.3087  | 1.633  |
| 103578_at   | 937.6  | 644    | 1003.9 | 654.5  | 596.2  | 688.1  | 842.6  | 769.9  | 0.463981222 | 810      | 724.2    | 85.8    | 1.118475559 | 0.4986  | -1.105 |
| 103579_at   | 414.5  | 272.1  | 354.9  | 349.5  | 298.7  | 543.1  | 385.9  | 327.1  | 0.54000373  | 347.75   | 388.7    | 40.95   | 0.894648829 | 0.5686  | 1.1    |
| 103580_at   | 991.8  | 1023.2 | 861.1  | 806.5  | 1167.2 | 905    | 1145   | 924.7  | 0.238826604 | 920.65   | 1035.475 | 114.825 | 0.889108863 | 0.2395  | 1.122  |
| 103581_at   | 615.8  | 649.8  | 480.9  | 393.9  | 718.8  | 616.8  | 529.1  | 551.8  | 0.385490096 | 535.1    | 604.125  | 69.025  | 0.885743844 | 0.3586  | 1.143  |
| 103582_r_at | 94.9   | 106.9  | 103.2  | 98     | 110.6  | 144    | 122.2  | 118.9  | 0.040426785 | 100.75   | 123.925  | 23.175  | 0.812991729 | 0.01669 | 1.225  |
| 103584_at   | 525    | 383.3  | 657.1  | 802.8  | 514.2  | 635.4  | 625.5  | 541.8  | 0.899386598 | 592.05   | 579.225  | 12.825  | 1.022141655 | 0.9517  | 1.011  |
| 103585_at   | 228.6  | 307.4  | 380.3  | 360    | 336.9  | 265.2  | 350.8  | 336.5  | 0.936452972 | 319.075  | 322.35   | 3.275   | 0.989840236 | 0.8667  | 1.023  |
| 103588_at   | 168.3  | 128.3  | 143.1  | 151.4  | 129.3  | 213.1  | 163.8  | 171.3  | 0.317241378 | 147.775  | 169.375  | 21.6    | 0.872472325 | 0.3241  | 1.134  |
| 103589_at   | 33.7   | 14.8   | 12.8   | 24.5   | 21.2   | 40.3   | 10.5   | 26.1   | 0.709219337 | 21.45    | 24.525   | 3.075   | 0.874617737 | 0.7884  | 1.106  |
| 103590_at   | 68.4   | 69.6   | 42.6   | 58.6   | 49.8   | 106.8  | 92.9   | 50.9   | 0.388251686 | 59.8     | 75.1     | 15.3    | 0.796271638 | 0.4453  | 1.206  |
| 103591_at   | 126.3  | 87.4   | 121.1  | 171    | 102.3  | 150.8  | 97.3   | 22.3   | 0.339307889 | 126.45   | 93.175   | 33.275  | 1.357123692 | 0.3195  | -1.617 |
| 103592_at   | 716.3  | 656.9  | 615.9  | 556.1  | 594.2  | 642.5  | 545.1  | 610.9  | 0.378362919 | 636.3    | 598.175  | 38.125  | 1.063735529 | 0.3868  | -1.061 |
| 103593_at   | 192.2  | 126.6  | 182.9  | 224.6  | 141.1  | 236.6  | 209.3  | 160.8  | 0.863349542 | 181.575  | 186.95   | 5.375   | 0.971248997 | 0.8695  | 1.03   |
| 103594_at   | 52.9   | 53.1   | 53.1   | 47.8   | 58.8   | 19.3   | 64.6   | 60.6   | 0.937879893 | 51.725   | 50.825   | 0.9     | 1.017707821 | 0.6967  | -1.126 |
| 103595_at   | 327.7  | 206.4  | 222.7  | 186.3  | 208.1  | 283.4  | 182.7  | 215.4  | 0.739540028 | 235.775  | 222.4    | 13.375  | 1.060139388 | 0.7683  | -1.049 |
| 103596_at   | 95.1   | 97     | 119    | 127.5  | 158.9  | 109.4  | 132    | 146.4  | 0.092433048 | 109.65   | 136.675  | 27.025  | 0.802268154 | 0.09156 | 1.244  |
| 103597_at   | 139.4  | 106.9  | 105    | 140.9  | 112.6  | 199.5  | 116    | 110.5  | 0.650290231 | 123.05   | 134.65   | 11.6    | 0.913850724 | 0.6976  | 1.069  |
| 103598_at   | 916.8  | 942.9  | 1047.5 | 924.7  | 910.8  | 797.1  | 1026.9 | 999.2  | 0.700755148 | 957.975  | 933.5    | 24.475  | 1.026218532 | 0.668   | -1.03  |
| 103599_at   | 78.8   | 40.4   | 47.3   | 71.2   | 66.8   | 70.6   | 65.1   | 55.6   | 0.631247954 | 59.425   | 64.525   | 5.1     | 0.920960868 | 0.5143  | 1.124  |
| 103600_at   | 54.8   | 56.5   | 49.5   | 59.4   | 46.3   | 69.6   | 49.6   | 36     | 0.562873938 | 55.05    | 50.375   | 4.675   | 1.09280397  | 0.4483  | -1.121 |
| 103601_at   | 148.2  | 75.5   | 67     | 98.8   | 79.2   | 143.6  | 86.5   | 106.7  | 0.785696631 | 97.375   | 104      | 6.625   | 0.936298077 | 0.7067  | 1.091  |
| 103602_at   | 152.1  | 88.2   | 117.6  | 142.1  | 85.7   | 224.3  | 117.4  | 162.8  | 0.532932244 | 125      | 147.55   | 22.55   | 0.847170451 | 0.6262  | 1.131  |
| 103603_at   | 331.5  | 327.8  | 336.9  | 274.9  | 292    | 305.3  | 307.8  | 303.9  | 0.364779485 | 317.775  | 302.25   | 15.525  | 1.051364764 | 0.3735  | -1.048 |
| 103604_at   | 27.9   | 19.5   | 9.5    | 11.4   | 12.9   | 18.9   | 4.6    | 20.2   | 0.615218668 | 17.075   | 14.15    | 2.925   | 1.206713781 | 0.5916  | -1.27  |
| 103605_g_at | 220.7  | 228.2  | 314.2  | 335.7  | 212.4  | 214.5  | 282.8  | 340.8  | 0.786088014 | 274.7    | 262.625  | 12.075  | 1.045978106 | 0.7724  | -1.049 |
| 103606_r_at | 319.4  | 452.2  | 728.8  | 733.2  | 450.6  | 311.8  | 658.7  | 750.4  | 0.917258129 | 558.4    | 542.875  | 15.525  | 1.028597743 | 0.9287  | -1.027 |



|             |        |        |        |        |        |        |        |        |             |          |          |         |             |          |        |
|-------------|--------|--------|--------|--------|--------|--------|--------|--------|-------------|----------|----------|---------|-------------|----------|--------|
| 103607_at   | 619.4  | 1200.2 | 561.2  | 566    | 957.1  | 609.9  | 591.1  | 635.5  | 0.838338525 | 736.7    | 698.4    | 38.3    | 1.054839633 | 0.9339   | 1.019  |
| 103608_at   | 928.5  | 794.9  | 834.3  | 610.6  | 883    | 1100   | 706.2  | 689.5  | 0.669683436 | 792.075  | 844.675  | 52.6    | 0.937727528 | 0.6986   | 1.059  |
| 103609_at   | 7.5    | 6.7    | 6.2    | 10.2   | 12.1   | 12.8   | 6.3    | 12.9   | 0.125980626 | 7.65     | 11.025   | 3.375   | 0.693877551 | 0.1408   | 1.413  |
| 103610_at   | 143.1  | 115.7  | 103.2  | 109.5  | 114.5  | 128.5  | 95.3   | 88.2   | 0.409785926 | 117.875  | 106.625  | 11.25   | 1.105509965 | 0.39     | -1.109 |
| 103611_at   | 518    | 579    | 884.1  | 754.9  | 733.2  | 632.2  | 832.6  | 767.9  | 0.568572254 | 684      | 741.475  | 57.475  | 0.922485586 | 0.4948   | 1.103  |
| 103612_at   | 31.5   | 30.1   | 69.6   | 29.9   | 31.1   | 38.9   | 117.6  | 73.1   | 0.315785722 | 40.275   | 65.175   | 24.9    | 0.617951669 | 0.2999   | 1.516  |
| 103613_at   | 191.2  | 163.2  | 146    | 112.1  | 108.9  | 171    | 166.2  | 113.7  | 0.594374954 | 153.125  | 139.95   | 13.175  | 1.094140765 | 0.5929   | -1.097 |
| 103614_at   | 165.6  | 161.6  | 126.8  | 146.1  | 133.4  | 144.9  | 108.3  | 139.1  | 0.170654982 | 150.025  | 131.425  | 18.6    | 1.141525585 | 0.1854   | -1.142 |
| 103615_at   | 7.8    | 2.2    | 0.9    | 5.7    | 1.3    | 2.8    | 3      | 2.1    | 0.330857069 | 4.15     | 2.3      | 1.85    | 1.804347826 | 0.5391   | -1.403 |
| 103616_at   | 16.8   | 18.9   | 14.7   | 14.7   | 25.1   | 28.3   | 15.3   | 19.6   | 0.135933863 | 16.275   | 22.075   | 5.8     | 0.737259343 | 0.1065   | 1.328  |
| 103617_at   | 55.4   | 63.8   | 64.8   | 103.3  | 91.7   | 88.2   | 143.9  | 110.4  | 0.070855394 | 71.825   | 108.55   | 36.725  | 0.661676647 | 0.05254  | 1.527  |
| 103618_at   | 10.5   | 4.3    | 1.9    | 5.8    | 9.5    | 3.4    | 2.4    | 1.6    | 0.603093178 | 5.625    | 4.225    | 1.4     | 1.331360947 | 0.5278   | -1.419 |
| 103619_at   | 661.3  | 675.4  | 905    | 717.7  | 871.9  | 825.6  | 912.7  | 864.9  | 0.10222796  | 739.85   | 868.775  | 128.925 | 0.851601393 | 0.06586  | 1.183  |
| 103620_s_at | 774.6  | 797.2  | 799.8  | 858.8  | 722.8  | 705.5  | 676.4  | 755.1  | 0.00908589  | 807.6    | 714.95   | 92.65   | 1.129589482 | 0.008634 | -1.13  |
| 103622_at   | 695.1  | 567.5  | 562.8  | 592.4  | 622.6  | 667.8  | 515.6  | 532.7  | 0.693121341 | 604.45   | 584.675  | 19.775  | 1.033822209 | 0.6709   | -1.036 |
| 103623_at   | 243.2  | 239.2  | 272.8  | 369.5  | 186.9  | 216    | 414.1  | 392.4  | 0.76310065  | 281.175  | 302.35   | 21.175  | 0.929965272 | 0.9052   | 1.029  |
| 103624_at   | 420.8  | 452    | 479.6  | 322.7  | 360.5  | 488.1  | 312.1  | 309.3  | 0.381012948 | 418.775  | 367.5    | 51.275  | 1.13952381  | 0.3567   | -1.147 |
| 103625_at   | 685.6  | 674.9  | 675.5  | 682.3  | 667.7  | 628    | 581.6  | 671.8  | 0.137014172 | 679.575  | 637.275  | 42.3    | 1.066376368 | 0.09888  | -1.068 |
| 103628_at   | 361.9  | 368.7  | 385.1  | 312.5  | 271.7  | 429.1  | 303.6  | 328.1  | 0.555804288 | 357.05   | 333.125  | 23.925  | 1.071819887 | 0.479    | -1.084 |
| 103629_g_at | 33.8   | 62.5   | 29.2   | 48.6   | 45.3   | 86.2   | 33.8   | 44.9   | 0.540654223 | 43.525   | 52.55    | 9.025   | 0.828258801 | 0.5395   | 1.186  |
| 103630_at   | 1121.3 | 1151.4 | 950.8  | 994.6  | 1245.6 | 1276.3 | 1237.5 | 1164.8 | 0.027133802 | 1054.525 | 1231.05  | 176.525 | 0.856606149 | 0.01998  | 1.17   |
| 103631_at   | 372.8  | 357.4  | 316.5  | 333.8  | 329.1  | 315.1  | 294.6  | 332.3  | 0.126957621 | 345.125  | 317.775  | 27.35   | 1.086067186 | 0.122    | -1.085 |
| 103632_at   | 39.4   | 24.5   | 29.8   | 30.4   | 20.7   | 26.2   | 19.6   | 42.2   | 0.553799007 | 31.025   | 27.175   | 3.85    | 1.141674333 | 0.4361   | -1.182 |
| 103634_at   | 378.5  | 439.4  | 330.3  | 333.8  | 547.8  | 434.7  | 321    | 501.3  | 0.211317828 | 370.5    | 451.2    | 80.7    | 0.821143617 | 0.2202   | 1.202  |
| 103635_at   | 410.6  | 463.6  | 354.5  | 376.8  | 442.9  | 392.6  | 367.9  | 434.9  | 0.791979602 | 401.375  | 409.575  | 8.2     | 0.979979247 | 0.7673   | 1.023  |
| 103636_at   | 1725.6 | 1308.6 | 1706.7 | 1653.5 | 1377.7 | 1889.4 | 1489.9 | 1713.5 | 0.90364124  | 1598.6   | 1617.625 | 19.025  | 0.988238931 | 0.9168   | 1.011  |
| 103637_at   | 928.2  | 605.4  | 562    | 560.5  | 588.4  | 825.2  | 640.9  | 755.8  | 0.725498698 | 664.025  | 702.575  | 38.55   | 0.945130413 | 0.637    | 1.074  |
| 103638_at   | 84.5   | 91.6   | 142.7  | 201.5  | 102.6  | 122.1  | 96.5   | 154.4  | 0.72776675  | 130.075  | 118.9    | 11.175  | 1.093986543 | 0.8536   | -1.045 |
| 103639_at   | 82.3   | 98.7   | 94.6   | 87.2   | 90     | 103.9  | 103.1  | 111.2  | 0.096968069 | 90.7     | 102.05   | 11.35   | 0.88878001  | 0.09849  | 1.125  |
| 103641_at   | 18.2   | 10.7   | 10.7   | 6.5    | 6.8    | 16.5   | 10     | 9.6    | 0.810279185 | 11.525   | 10.725   | 0.8     | 1.074592075 | 0.842    | -1.059 |
| 103642_at   | 3411.4 | 3215.2 | 3237.5 | 3270.5 | 3249.9 | 3501.2 | 3256.2 | 3040.6 | 0.844467564 | 3283.65  | 3261.975 | 21.675  | 1.006644747 | 0.8183   | 1.008  |
| 103643_at   | 1351.5 | 1212.2 | 1320.3 | 1291.7 | 900.1  | 871.9  | 826.7  | 1043.5 | 0.000906699 | 1293.925 | 910.55   | 383.375 | 1.421036736 | 0.000667 | -1.425 |
| 103644_at   | 274.9  | 281.2  | 206.6  | 256.7  | 233.2  | 242.4  | 296.4  | 207    | 0.70331582  | 254.85   | 244.75   | 10.1    | 1.041266599 | 0.6981   | -1.043 |
| 103645_at   | 35.9   | 23.8   | 18.5   | 12.6   | 8.6    | 73.8   | 31.5   | 35.5   | 0.369381217 | 22.7     | 37.35    | 14.65   | 0.607764391 | 0.5486   | 1.373  |
| 103646_at   | 281.9  | 215.2  | 228.8  | 229.2  | 209.8  | 274.5  | 257.8  | 245.7  | 0.698892115 | 238.775  | 246.95   | 8.175   | 0.966896133 | 0.6916   | 1.035  |
| 103647_at   | 566.4  | 533.7  | 483.6  | 506.9  | 629.2  | 594.2  | 607.9  | 571.4  | 0.0138047   | 522.65   | 600.675  | 78.025  | 0.870104466 | 0.01207  | 1.151  |
| 103648_at   | 138.2  | 94.3   | 86.1   | 98.9   | 115.1  | 126.9  | 95.4   | 111.3  | 0.584001596 | 104.375  | 112.175  | 7.8     | 0.93046579  | 0.51     | 1.087  |
| 103649_at   | 251.2  | 339.8  | 461.9  | 419.4  | 654.3  | 696    | 941.6  | 712.1  | 0.003868672 | 368.075  | 751      | 382.925 | 0.490113182 | 0.003551 | 2.073  |
| 103650_at   | 667.5  | 608.6  | 546.4  | 673.7  | 660.8  | 693.6  | 636.1  | 755    | 0.165179466 | 624.05   | 686.375  | 62.325  | 0.909196868 | 0.1657   | 1.101  |
| 103651_r_at | 1012.9 | 906.5  | 745.5  | 597.1  | 984.3  | 906.1  | 723.1  | 1069   | 0.406148108 | 815.5    | 920.625  | 105.125 | 0.88581127  | 0.3972   | 1.14   |
| 103653_at   | 777.2  | 739.1  | 660.4  | 582.9  | 529.8  | 417.6  | 386.3  | 431.5  | 0.004379625 | 689.9    | 441.3    | 248.6   | 1.563335599 | 0.002942 | -1.565 |
| 103654_at   | 1266.4 | 1001.4 | 1315.4 | 1240.4 | 982.5  | 1072.6 | 1188.8 | 951.2  | 0.127584773 | 1205.9   | 1048.775 | 157.125 | 1.149817644 | 0.1319   | -1.148 |
| 103655_at   | 626.2  | 734.7  | 549.2  | 653.9  | 786.4  | 573.3  | 918.7  | 842    | 0.162683804 | 641      | 780.1    | 139.1   | 0.821689527 | 0.1675   | 1.205  |
| 103656_at   | 1267.8 | 1635.8 | 1212.5 | 1140.9 | 1576.9 | 1108.5 | 1210.7 | 1214.4 | 0.816139492 | 1314.25  | 1277.625 | 36.625  | 1.028666471 | 0.8107   | 1.028  |
| 103657_i_at | 584.3  | 529.5  | 661.7  | 753.7  | 707.3  | 701.5  | 668.4  | 764.9  | 0.211923633 | 632.3    | 710.525  | 78.225  | 0.889905352 | 0.1782   | 1.132  |
| 103658_r_at | 79.4   | 76.3   | 91.6   | 94.9   | 99.3   | 99.1   | 86.9   | 102.5  | 0.095747483 | 85.55    | 96.95    | 11.4    | 0.882413615 | 0.09655  | 1.136  |
| 103660_at   | 233.9  | 264.1  | 236.1  | 303.5  | 262.4  | 216.9  | 255.2  | 264.3  | 0.641571241 | 259.4    | 249.7    | 9.7     | 1.038846616 | 0.6581   | -1.036 |
| 103662_at   | 17.3   | 33.2   | 43     | 9.5    | 68.8   | 32.3   | 50.4   | 46.2   | 0.068488319 | 25.75    | 49.425   | 23.675  | 0.520991401 | 0.08372  | 2.163  |
| 103663_at   | 281.2  | 292.8  | 308    | 367.6  | 264    | 273.3  | 401.5  | 335.1  | 0.876750135 | 312.4    | 318.475  | 6.075   | 0.980924719 | 0.932    | 1.01   |
| 103664_r_at | 262.2  | 336.1  | 339.9  | 310.6  | 360.1  | 291.3  | 342.5  | 321.7  | 0.499817033 | 312.2    | 328.9    | 16.7    | 0.949224688 | 0.4985   | 1.056  |
| 103665_at   | 294.3  | 270.8  | 406.3  | 308.1  | 403.5  | 347.6  | 431.3  | 367.4  | 0.112313375 | 319.875  | 387.45   | 67.575  | 0.825590399 | 0.09258  | 1.222  |
| 103666_at   | 70.8   | 45.6   | 164.5  | 193    | 42.8   | 93.3   | 163.7  | 237.4  | 0.784947777 | 118.475  | 134.3    | 15.825  | 0.882166791 | 0.8441   | 1.11   |
| 103667_at   | 466.5  | 489.4  | 653.1  | 723    | 591.4  | 520.5  | 586.2  | 682.9  | 0.870078546 | 583      | 595.25   | 12.25   | 0.979420412 | 0.7912   | 1.034  |
| 103668_at   | 672.7  | 799.5  | 816.3  | 873.1  | 912.1  | 775.4  | 904.6  | 908.8  | 0.168771915 | 790.4    | 875.225  | 84.825  | 0.903082065 | 0.1778   | 1.11   |
| 103669_at   | 252.2  | 219    | 208.5  | 177.2  | 260.4  | 310.3  | 244.5  | 236.3  | 0.075753011 | 214.225  | 262.875  | 48.65   | 0.814931051 | 0.07149  | 1.23   |
| 103670_at   | 103.8  | 103.6  | 45.2   | 92.9   | 65.2   | 163.3  | 106.5  | 78.2   | 0.541242426 | 86.375   | 103.3    | 16.925  | 0.836156825 | 0.5743   | 1.183  |



|             |        |        |        |        |        |        |        |        |             |          |          |         |             |         |        |
|-------------|--------|--------|--------|--------|--------|--------|--------|--------|-------------|----------|----------|---------|-------------|---------|--------|
| 103671_at   | 39.7   | 96.1   | 97     | 64.3   | 95.6   | 134.3  | 129.2  | 92.2   | 0.07393082  | 74.275   | 112.825  | 38.55   | 0.658320408 | 0.09287 | 1.593  |
| 103672_at   | 547.6  | 661.5  | 639.3  | 775.6  | 619.2  | 493.6  | 538.8  | 780.1  | 0.564612522 | 656      | 607.925  | 48.075  | 1.079080479 | 0.5202  | -1.087 |
| 103673_at   | 396.7  | 412    | 398.7  | 395.2  | 420.7  | 485.4  | 429    | 334.3  | 0.630984607 | 400.65   | 417.35   | 16.7    | 0.959985624 | 0.6951  | 1.033  |
| 103674_f_at | 519.6  | 705.4  | 596.6  | 630.3  | 702.1  | 679.5  | 843.5  | 666.5  | 0.098301737 | 612.975  | 722.9    | 109.925 | 0.847938857 | 0.09295 | 1.181  |
| 103675_at   | 83.2   | 101    | 207.9  | 139.2  | 216.6  | 153.8  | 211.5  | 261.8  | 0.071607242 | 132.825  | 210.925  | 78.1    | 0.629726206 | 0.06869 | 1.659  |
| 103676_at   | 85.8   | 70.6   | 76.4   | 67.7   | 48.6   | 74     | 94.6   | 94.9   | 0.816567627 | 75.125   | 78.025   | 2.9     | 0.962832426 | 0.9651  | 1.008  |
| 103678_at   | 1940.9 | 1436.3 | 1767.4 | 1905.9 | 1575.2 | 1937.2 | 1539   | 1765.5 | 0.706333889 | 1762.625 | 1704.225 | 58.4    | 1.034267776 | 0.7335  | -1.032 |
| 103679_at   | 81     | 43.9   | 11.5   | 7.9    | 13.1   | 15.9   | 13     | 10.5   | 0.270460154 | 36.075   | 13.125   | 22.95   | 2.748571429 | 0.315   | -1.838 |
| 103680_at   | 436.8  | 265.8  | 486.4  | 439.6  | 104.9  | 353.1  | 446.4  | 368.5  | 0.359370335 | 407.15   | 318.225  | 88.925  | 1.279440647 | 0.3637  | -1.421 |
| 103681_at   | 748.6  | 588    | 849.3  | 721    | 621.3  | 602.9  | 782.5  | 739.4  | 0.585051404 | 726.725  | 686.525  | 40.2    | 1.05855577  | 0.6043  | -1.056 |
| 103682_at   | 342.8  | 468.3  | 607.8  | 444.2  | 529    | 240.5  | 479.9  | 358.1  | 0.479634805 | 465.775  | 401.875  | 63.9    | 1.159004666 | 0.4513  | -1.187 |
| 103683_at   | 372    | 333.1  | 476.9  | 424.2  | 373.6  | 335.7  | 446    | 468.9  | 0.921982297 | 401.55   | 406.05   | 4.5     | 0.988917621 | 0.9218  | 1.011  |
| 103684_at   | 7.8    | 33.8   | 47.8   | 51.1   | 55.6   | 19.4   | 35     | 26.8   | 0.943859406 | 35.125   | 34.2     | 0.925   | 1.027046784 | 0.8246  | 1.121  |
| 103685_at   | 77.1   | 83.9   | 146.1  | 168.9  | 101.4  | 90.6   | 112    | 141.7  | 0.778210258 | 119      | 111.425  | 7.575   | 1.067982948 | 0.9202  | 1.023  |
| 103686_at   | 17     | 7.3    | 4      | 37.2   | 18.1   | 9.2    | 29.7   | 25.8   | 0.641726288 | 16.375   | 20.7     | 4.325   | 0.791062802 | 0.4162  | 1.619  |
| 103688_at   | 14.9   | 10.8   | 4      | 4.3    | 10.7   | 11.7   | 5.4    | 13.8   | 0.576675504 | 8.5      | 10.4     | 1.9     | 0.817307692 | 0.4634  | 1.356  |
| 103689_at   | 144.9  | 52     | 229.5  | 151.3  | 239.8  | 149.9  | 216.3  | 198    | 0.231899911 | 144.425  | 201      | 56.575  | 0.718532338 | 0.23    | 1.557  |
| 103690_at   | 143    | 89.4   | 111    | 116.2  | 124.3  | 144.8  | 113.3  | 116.8  | 0.482600459 | 114.9    | 124.8    | 9.9     | 0.920673077 | 0.4384  | 1.096  |
| 103691_at   | 1039.1 | 849.1  | 802.5  | 667.1  | 847.8  | 971.6  | 615.5  | 673.3  | 0.597900742 | 839.45   | 777.05   | 62.4    | 1.080303713 | 0.5797  | -1.085 |
| 103692_at   | 487.5  | 471.5  | 534.3  | 414.8  | 570.6  | 537.8  | 380    | 408.2  | 0.959140764 | 477.025  | 474.15   | 2.875   | 1.006063482 | 0.8858  | 1.017  |
| 103693_at   | 74     | 62.6   | 88.5   | 64.1   | 52.3   | 55.6   | 44.1   | 85.4   | 0.282526543 | 72.3     | 59.35    | 12.95   | 1.218197136 | 0.2238  | -1.245 |
| 103694_at   | 296.7  | 357.1  | 302.7  | 331.7  | 295.6  | 170.8  | 271.5  | 262.7  | 0.072468015 | 322.05   | 250.15   | 71.9    | 1.287427543 | 0.08261 | -1.311 |
| 103695_f_at | 2003.2 | 1988.3 | 1553   | 1579.9 | 2097.5 | 1853.1 | 1751.5 | 1592.7 | 0.802878224 | 1781.1   | 1823.7   | 42.6    | 0.976640895 | 0.7841  | 1.026  |
| 103696_r_at | 25     | 17.2   | 26.1   | 37     | 35.9   | 33.6   | 30.2   | 35.4   | 0.164116114 | 26.325   | 33.775   | 7.45    | 0.77942265  | 0.132   | 1.325  |
| 103697_at   | 361.8  | 318.8  | 476.8  | 437.5  | 387.2  | 382    | 370.5  | 413.7  | 0.794973453 | 398.725  | 388.35   | 10.375  | 1.026715592 | 0.8793  | 1.015  |
| 103699_i_at | 124.8  | 75.3   | 115.8  | 126.3  | 127.5  | 178.6  | 146.6  | 118.3  | 0.122964187 | 110.55   | 142.75   | 32.2    | 0.774430823 | 0.1342  | 1.302  |
| 103700_r_at | 70.5   | 89     | 80.5   | 108.1  | 65     | 114.5  | 70.3   | 65.7   | 0.593670026 | 87.025   | 78.875   | 8.15    | 1.103328051 | 0.5032  | -1.123 |
| 103701_at   | 481.6  | 533.2  | 469.8  | 667.6  | 631.8  | 356.9  | 590.7  | 446.2  | 0.70131518  | 538.05   | 506.4    | 31.65   | 1.0625      | 0.6399  | -1.079 |
| 103702_i_at | 12.4   | 9.1    | 4.8    | 13.1   | 16.3   | 49.3   | 36.8   | 12.2   | 0.118399818 | 9.85     | 28.65    | 18.8    | 0.343804538 | 0.05057 | 2.67   |
| 103703_f_at | 58.6   | 70.2   | 56.4   | 92     | 125.3  | 62.7   | 105.5  | 57.4   | 0.369152853 | 69.3     | 87.725   | 18.425  | 0.789968652 | 0.401   | 1.222  |
| 103704_at   | 469.8  | 451.8  | 377    | 435.7  | 476.6  | 557.6  | 360.1  | 442.1  | 0.603085761 | 433.575  | 459.1    | 25.525  | 0.944402091 | 0.6542  | 1.05   |
| 103706_at   | 410.6  | 406.2  | 482.5  | 462.8  | 462.2  | 479.6  | 471.2  | 401.2  | 0.634830335 | 440.525  | 453.55   | 13.025  | 0.971282108 | 0.6382  | -1.03  |
| 103707_at   | 117.9  | 106.6  | 111.3  | 71.9   | 85.7   | 140    | 152    | 94.2   | 0.445510723 | 101.925  | 117.975  | 16.05   | 0.863954228 | 0.4881  | 1.143  |
| 103708_at   | 870.4  | 801.9  | 824.5  | 692.5  | 837.9  | 995.7  | 846.6  | 764.5  | 0.340979661 | 797.325  | 861.175  | 63.85   | 0.925857114 | 0.3416  | 1.079  |
| 103709_at   | 2131.7 | 2099.7 | 1918.4 | 1737.7 | 1973.4 | 2500.2 | 1911.4 | 1824.3 | 0.669808171 | 1971.875 | 2052.325 | 80.45   | 0.960800555 | 0.6886  | 1.036  |
| 103710_at   | 238.6  | 262.5  | 285.1  | 275.2  | 311.6  | 245.6  | 281.4  | 292.9  | 0.349855264 | 265.35   | 282.875  | 17.525  | 0.93804684  | 0.3636  | 1.064  |
| 103711_at   | 268.2  | 275.6  | 294.7  | 408.5  | 347.8  | 337.1  | 435.4  | 368.7  | 0.183005693 | 311.75   | 372.25   | 60.5    | 0.837474815 | 0.1475  | 1.206  |
| 103712_at   | 498.9  | 518.6  | 684.8  | 871.3  | 646.6  | 452.3  | 759.2  | 856.9  | 0.782943375 | 643.4    | 678.75   | 35.35   | 0.947918969 | 0.7932  | 1.054  |
| 103713_at   | 1474.6 | 1359.6 | 1642.1 | 1746   | 1561.2 | 1742.6 | 1847.5 | 1956.3 | 0.115368612 | 1555.575 | 1776.9   | 221.325 | 0.875443188 | 0.1182  | 1.144  |
| 103714_at   | 60.1   | 28.1   | 19.7   | 22.6   | 6.1    | 31     | 13.2   | 10     | 0.167534343 | 32.625   | 15.075   | 17.55   | 2.164179104 | 0.08927 | -2.343 |
| 103715_at   | 159.2  | 79.2   | 94.8   | 83.4   | 69.6   | 143.1  | 110.3  | 107.3  | 0.891166135 | 104.15   | 107.575  | 3.425   | 0.968161748 | 0.8549  | 1.043  |
| 103716_at   | 374    | 291.1  | 280    | 439.5  | 325.5  | 412    | 319.4  | 431.1  | 0.606126825 | 346.15   | 372      | 25.85   | 0.930510753 | 0.566   | 1.084  |
| 103717_at   | 342.3  | 311.1  | 287.8  | 317    | 380.9  | 248.1  | 335.2  | 302.3  | 0.948418395 | 314.55   | 316.625  | 2.075   | 0.993446506 | 0.9722  | -1.004 |
| 103718_at   | 68.8   | 105.7  | 187.8  | 177.6  | 69.1   | 75.2   | 145.6  | 130.8  | 0.426080802 | 134.975  | 105.175  | 29.8    | 1.283337295 | 0.488   | -1.251 |
| 103719_at   | 35.7   | 15.9   | 11.1   | 11.9   | 14.9   | 38.7   | 16.4   | 37.4   | 0.381844437 | 18.65    | 26.85    | 8.2     | 0.694599628 | 0.3395  | 1.471  |
| 103720_at   | 256.3  | 311.7  | 351.6  | 646.8  | 225.3  | 306.2  | 426.5  | 459    | 0.730921249 | 391.6    | 354.25   | 37.35   | 1.105434016 | 0.7836  | -1.077 |
| 103721_at   | 52.8   | 100.8  | 105.5  | 166.4  | 73.4   | 105.8  | 150    | 114.9  | 0.874772199 | 106.375  | 111.025  | 4.65    | 0.958117541 | 0.7586  | 1.094  |
| 103723_at   | 105.6  | 145.3  | 117.1  | 148    | 150.6  | 132.2  | 171.1  | 171.9  | 0.100308569 | 129      | 156.45   | 27.45   | 0.824544583 | 0.1051  | 1.218  |
| 103726_at   | 788.4  | 795.9  | 927.2  | 683.7  | 724.2  | 818.1  | 938.5  | 706.4  | 0.979015087 | 798.8    | 796.8    | 2       | 1.00251004  | 0.973   | -1.003 |
| 103727_at   | 290    | 240.9  | 309.4  | 306.7  | 340.3  | 329.2  | 403.5  | 350.1  | 0.02351405  | 286.75   | 355.775  | 69.025  | 0.80598693  | 0.02527 | 1.243  |
| 103728_at   | 98.5   | 81.7   | 138.1  | 105.4  | 101.7  | 126.2  | 99.5   | 107.9  | 0.836806482 | 105.925  | 108.825  | 2.9     | 0.973351711 | 0.7501  | 1.041  |
| 103729_at   | 452.9  | 364.3  | 427.6  | 546.6  | 443.5  | 426.6  | 606.6  | 594.3  | 0.298162675 | 447.85   | 517.75   | 69.9    | 0.864992757 | 0.2994  | 1.153  |
| 103730_at   | 6.4    | 7.5    | 5.6    | 4      | 5.7    | 6.6    | 6.6    | 7.3    | 0.447960565 | 5.875    | 6.55     | 0.675   | 0.896946565 | 0.3937  | 1.142  |
| 103731_at   | 295.4  | 277.6  | 240.6  | 258.8  | 259.5  | 218.4  | 244.9  | 323.6  | 0.808319238 | 268.1    | 261.6    | 6.5     | 1.024847095 | 0.7434  | -1.033 |
| 103732_at   | 133.5  | 159.3  | 108.4  | 132.6  | 172.3  | 137.5  | 174    | 149.4  | 0.120669388 | 133.45   | 158.3    | 24.85   | 0.843019583 | 0.1222  | 1.191  |
| 103733_at   | 140.6  | 102.8  | 124.5  | 152.7  | 110.4  | 146.6  | 134.4  | 118.2  | 0.84588532  | 130.15   | 127.4    | 2.75    | 1.021585557 | 0.8814  | 1.017  |



|             |        |        |        |        |        |        |        |        |             |          |         |         |             |          |        |
|-------------|--------|--------|--------|--------|--------|--------|--------|--------|-------------|----------|---------|---------|-------------|----------|--------|
| 103734_at   | 312.2  | 344    | 421.5  | 479.1  | 387.1  | 322.5  | 342.4  | 381.2  | 0.491247999 | 389.2    | 358.3   | 30.9    | 1.086240581 | 0.526    | -1.074 |
| 103735_at   | 775.2  | 833.1  | 1075.4 | 921.1  | 1044.2 | 686.4  | 728.1  | 765.2  | 0.397090084 | 901.2    | 805.975 | 95.225  | 1.118148826 | 0.3546   | -1.125 |
| 103736_at   | 140.5  | 173.3  | 193.6  | 267.5  | 179.4  | 215    | 209.3  | 249    | 0.553808457 | 193.725  | 213.175 | 19.45   | 0.908760408 | 0.4671   | 1.124  |
| 103737_at   | 337.7  | 265.5  | 310.3  | 405    | 329    | 259.6  | 471.4  | 495.4  | 0.399701442 | 329.625  | 388.85  | 59.225  | 0.847691912 | 0.4505   | 1.153  |
| 103738_at   | 427.8  | 231.7  | 419.3  | 526.7  | 374.5  | 595.5  | 530.2  | 517.7  | 0.233598575 | 401.375  | 504.475 | 103.1   | 0.795629119 | 0.2519   | 1.293  |
| 103739_at   | 711.6  | 609.1  | 644.5  | 647    | 704.6  | 631.7  | 592.6  | 638.2  | 0.733176943 | 653.05   | 641.775 | 11.275  | 1.017568462 | 0.7247   | -1.018 |
| 103741_at   | 539.8  | 479    | 356    | 286.4  | 404.4  | 368.3  | 307.2  | 273.4  | 0.292995322 | 415.3    | 338.325 | 76.975  | 1.227517919 | 0.3111   | -1.205 |
| 103742_at   | 190.5  | 206.2  | 174    | 241.7  | 245    | 267.8  | 154    | 178.2  | 0.801303037 | 203.1    | 211.25  | 8.15    | 0.961420118 | 0.8884   | 1.022  |
| 103743_at   | 87.5   | 52.8   | 57.3   | 75.9   | 60.2   | 70.3   | 70.2   | 61.1   | 0.751231876 | 68.375   | 65.45   | 2.925   | 1.044690604 | 0.849    | -1.025 |
| 103744_at   | 103.8  | 119.9  | 114.7  | 161.1  | 129.1  | 97.9   | 170.2  | 148.1  | 0.584712226 | 124.875  | 136.325 | 11.45   | 0.916009536 | 0.6081   | 1.085  |
| 103745_at   | 184.9  | 182    | 237.8  | 246.2  | 123.5  | 178.7  | 247.5  | 219.9  | 0.551482775 | 212.725  | 192.4   | 20.325  | 1.105639293 | 0.4997   | -1.132 |
| 103746_at   | 199    | 141.2  | 263.7  | 370.9  | 75.9   | 167.3  | 359.9  | 292.8  | 0.81470488  | 243.7    | 223.975 | 19.725  | 1.088067865 | 0.6719   | -1.197 |
| 103748_at   | 30.9   | 26.6   | 52.1   | 169.1  | 29.6   | 23.7   | 83.3   | 35.8   | 0.504681721 | 69.675   | 43.1    | 26.575  | 1.616589327 | 0.557    | -1.366 |
| 103751_at   | 108.4  | 101.3  | 108.8  | 144.3  | 81.2   | 166.6  | 103.3  | 84.8   | 0.774404173 | 115.7    | 108.975 | 6.725   | 1.061711402 | 0.6235   | -1.099 |
| 103752_r_at | 217.2  | 280.6  | 407.4  | 410    | 267.5  | 169.8  | 297.1  | 238    | 0.183666469 | 328.8    | 243.1   | 85.7    | 1.352529823 | 0.1925   | -1.335 |
| 103753_at   | 1314.1 | 1221.6 | 980.8  | 1277.4 | 1041.5 | 1145.5 | 1344.9 | 1391.7 | 0.781324215 | 1198.475 | 1230.9  | 32.425  | 0.973657486 | 0.793    | 1.026  |
| 103754_at   | 923    | 811.1  | 822.4  | 836.5  | 903.6  | 812.5  | 940.9  | 950.5  | 0.235359126 | 848.25   | 901.875 | 53.625  | 0.940540541 | 0.238    | 1.063  |
| 103755_at   | 163.2  | 209.8  | 300.5  | 341.5  | 94.1   | 120.2  | 176.2  | 192    | 0.072230673 | 253.75   | 145.625 | 108.125 | 1.74248927  | 0.058    | -1.741 |
| 103756_at   | 928.6  | 903.8  | 809.1  | 920.5  | 991.8  | 1021.8 | 897.1  | 792    | 0.577910623 | 890.5    | 925.675 | 35.175  | 0.962000702 | 0.6102   | 1.036  |
| 103757_at   | 132    | 106    | 129.4  | 149.3  | 122.6  | 117.9  | 141.2  | 125.8  | 0.831433278 | 129.175  | 126.875 | 2.3     | 1.018128079 | 0.8763   | 1.013  |
| 103759_at   | 28.9   | 6.6    | 12.1   | 6.2    | 23.9   | 19.2   | 22.1   | 17.5   | 0.270782139 | 13.45    | 20.675  | 7.225   | 0.650544135 | 0.1337   | 1.881  |
| 103760_at   | 193.2  | 181.6  | 198.6  | 208.3  | 136.6  | 169.1  | 173.9  | 218.6  | 0.310702798 | 195.425  | 174.55  | 20.875  | 1.11959324  | 0.2572   | -1.134 |
| 103761_at   | 107.2  | 73.6   | 121.3  | 146.5  | 111.1  | 173.1  | 147.9  | 167.9  | 0.117647811 | 112.15   | 150     | 37.85   | 0.747666667 | 0.1341   | 1.359  |
| 103762_at   | 970.1  | 1099.1 | 881.1  | 800.9  | 1293   | 1046   | 870.9  | 957.5  | 0.389597423 | 937.8    | 1041.85 | 104.05  | 0.900129577 | 0.3855   | 1.106  |
| 103763_at   | 340.5  | 337.7  | 370.9  | 609.2  | 390.7  | 694.3  | 429.2  | 540.8  | 0.333700824 | 414.575  | 513.75  | 99.175  | 0.806958637 | 0.2897   | 1.248  |
| 103765_at   | 138.4  | 120.6  | 97.7   | 136.6  | 96     | 98.9   | 105.6  | 95.5   | 0.078317126 | 123.325  | 99      | 24.325  | 1.245707071 | 0.04571  | -1.235 |
| 103766_at   | 58.9   | 47.2   | 95.6   | 126    | 39     | 97.7   | 96     | 99.1   | 0.966215039 | 81.925   | 82.95   | 1.025   | 0.987643159 | 0.9532   | 1.02   |
| 103767_f_at | 121.9  | 140.4  | 155.5  | 153.2  | 161.9  | 93.5   | 114.9  | 139.4  | 0.405537097 | 142.75   | 127.425 | 15.325  | 1.120266824 | 0.3618   | -1.139 |
| 103768_at   | 75.6   | 62.8   | 154.4  | 167    | 52.5   | 102    | 108.7  | 96.3   | 0.440713286 | 114.95   | 89.875  | 25.075  | 1.278998609 | 0.5384   | -1.216 |
| 103769_at   | 25.2   | 19.3   | 3.9    | 14.4   | 20.7   | 27.8   | 23.5   | 13     | 0.354978433 | 15.7     | 21.25   | 5.55    | 0.738823529 | 0.3353   | 1.597  |
| 103770_at   | 14.6   | 14.6   | 59.5   | 20.6   | 47     | 63.5   | 41.2   | 52.5   | 0.113071656 | 27.325   | 51.05   | 23.725  | 0.535259549 | 0.05925  | 2.226  |
| 103771_at   | 727.7  | 627.6  | 623.1  | 763.6  | 698.6  | 960.6  | 582.3  | 728.7  | 0.545761868 | 685.5    | 742.55  | 57.05   | 0.923170157 | 0.58     | 1.07   |
| 103773_at   | 304.2  | 287.3  | 348.2  | 521.5  | 434.3  | 411.1  | 490.2  | 459.1  | 0.220113612 | 365.3    | 448.675 | 83.375  | 0.814175071 | 0.1473   | 1.261  |
| 103774_at   | 188.4  | 155.8  | 160.5  | 244.4  | 196.9  | 183.7  | 243.3  | 234.4  | 0.319856835 | 187.275  | 214.575 | 27.3    | 0.872771758 | 0.2814   | 1.157  |
| 103776_at   | 31.2   | 30.7   | 9      | 35.3   | 33.7   | 75.6   | 33.6   | 38.6   | 0.17204468  | 26.55    | 45.375  | 18.825  | 0.585123967 | 0.1632   | 1.818  |
| 103778_at   | 66.1   | 19.8   | 14     | 54.6   | 33.1   | 14.2   | 38.4   | 31.6   | 0.538845535 | 38.625   | 29.325  | 9.3     | 1.31713555  | 0.7587   | -1.152 |
| 103779_at   | 138.2  | 233.4  | 238.5  | 283.8  | 171.9  | 321.2  | 217.5  | 238.9  | 0.761359499 | 223.475  | 237.375 | 13.9    | 0.941442865 | 0.7466   | 1.071  |
| 103780_at   | 221.7  | 206.4  | 288.2  | 289.7  | 325.4  | 269.8  | 304.9  | 331.9  | 0.080165282 | 251.5    | 308     | 56.5    | 0.816558442 | 0.0786   | 1.235  |
| 103781_at   | 1098.4 | 1117.8 | 1048.4 | 1090.2 | 1155.5 | 1154.5 | 1229   | 1242.6 | 0.011828629 | 1088.7   | 1195.4  | 106.7   | 0.910741175 | 0.007922 | 1.098  |
| 103782_at   | 172    | 156    | 153.9  | 173.1  | 162.9  | 230.8  | 111.4  | 199.1  | 0.667766163 | 163.75   | 176.05  | 12.3    | 0.930133485 | 0.8185   | 1.039  |
| 103783_at   | 863    | 597.1  | 767.9  | 978.1  | 661.1  | 760.8  | 848.1  | 886.5  | 0.901097045 | 801.525  | 789.125 | 12.4    | 1.015713607 | 0.9639   | 1.006  |
| 103784_at   | 131.4  | 187.9  | 205.2  | 204.2  | 180.8  | 169.7  | 164.1  | 224.4  | 0.911295394 | 182.175  | 184.75  | 2.575   | 0.986062246 | 0.8681   | 1.022  |
| 103786_at   | 95.3   | 82.4   | 65     | 113    | 58     | 90.5   | 108.5  | 107.9  | 0.887647151 | 88.925   | 91.225  | 2.3     | 0.974787613 | 0.9345   | 1.016  |
| 103787_at   | 11.9   | 9.7    | 8.6    | 13.1   | 6.3    | 11.7   | 7.4    | 11.8   | 0.42285145  | 10.825   | 9.3     | 1.525   | 1.163978495 | 0.387    | -1.19  |
| 103789_at   | 162    | 194.2  | 232.2  | 547.1  | 152.8  | 181.7  | 300.3  | 279    | 0.594742851 | 283.875  | 228.45  | 55.425  | 1.242613263 | 0.683    | -1.145 |
| 103790_at   | 870.3  | 466    | 756.6  | 607.9  | 566.7  | 713.5  | 621.3  | 521.2  | 0.511905121 | 675.2    | 605.675 | 69.525  | 1.114789285 | 0.5815   | -1.093 |
| 103791_at   | 345.8  | 256.7  | 423.3  | 560.5  | 205.7  | 233.7  | 493.9  | 429.9  | 0.583006058 | 396.575  | 340.8   | 55.775  | 1.163659038 | 0.5318   | -1.199 |
| 103792_at   | 20.2   | 18.7   | 28.4   | 23     | 11.6   | 25.2   | 15.1   | 18.6   | 0.222707608 | 22.575   | 17.625  | 4.95    | 1.280851064 | 0.1932   | -1.316 |
| 103793_at   | 204.2  | 137.6  | 190.8  | 106.7  | 116.1  | 214.2  | 144.9  | 146.5  | 0.891366547 | 159.825  | 155.425 | 4.4     | 1.028309474 | 0.9219   | -1.02  |
| 103794_i_at | 1.8    | 2.6    | 2.6    | 2.1    | 3.6    | 5      | 10.9   | 4.2    | 0.11783336  | 2.275    | 5.925   | 3.65    | 0.383966245 | 0.01657  | 2.358  |
| 103795_f_at | 109.3  | 40.5   | 55     | 68.9   | 70.1   | 127.5  | 70.9   | 34.1   | 0.777095939 | 68.425   | 75.65   | 7.225   | 0.904494382 | 0.8592   | 1.065  |
| 103796_at   | 329.5  | 364    | 450    | 497    | 458.9  | 338    | 590.1  | 549.5  | 0.322392254 | 410.125  | 484.125 | 74      | 0.847146915 | 0.3529   | 1.17   |
| 103797_at   | 458.2  | 317.6  | 527.1  | 576.2  | 518.4  | 525.3  | 526.5  | 512.3  | 0.432570988 | 469.775  | 520.625 | 50.85   | 0.902328932 | 0.3711   | 1.135  |
| 103799_at   | 313.9  | 314.8  | 325.6  | 315.5  | 323.5  | 270.1  | 307.3  | 298.6  | 0.214841247 | 317.45   | 299.875 | 17.575  | 1.058607753 | 0.18     | -1.061 |
| 103800_at   | 565.9  | 452.7  | 435    | 492.5  | 516.9  | 666.1  | 469.9  | 491.9  | 0.390476486 | 486.525  | 536.2   | 49.675  | 0.907357329 | 0.3769   | 1.097  |
| 103801_at   | 367.5  | 394.4  | 241.8  | 257.6  | 299.8  | 359.8  | 287.9  | 286.3  | 0.878072092 | 315.325  | 308.45  | 6.875   | 1.022288864 | 0.9784   | 1.004  |



|             |        |        |        |        |        |        |        |        |             |          |          |         |             |         |        |
|-------------|--------|--------|--------|--------|--------|--------|--------|--------|-------------|----------|----------|---------|-------------|---------|--------|
| 103803_at   | 59.8   | 42     | 72.9   | 73.2   | 87.3   | 37     | 48.3   | 76.2   | 0.987665994 | 61.975   | 62.2     | 0.225   | 0.996382637 | 0.9017  | -1.031 |
| 103804_at   | 400.4  | 471.7  | 390.9  | 641.2  | 404.6  | 250.1  | 636.5  | 607.9  | 0.991016048 | 476.05   | 474.775  | 1.275   | 1.002685483 | 0.8529  | -1.049 |
| 103805_at   | 285.5  | 254.5  | 339.6  | 304    | 357    | 326.1  | 291.7  | 327.7  | 0.233464754 | 295.9    | 325.625  | 29.725  | 0.908714012 | 0.2263  | 1.104  |
| 103806_at   | 9      | 12.8   | 15.7   | 10     | 10.9   | 11.8   | 10.9   | 8      | 0.432951603 | 11.875   | 10.4     | 1.475   | 1.141826923 | 0.4635  | -1.126 |
| 103807_at   | 288.5  | 304.5  | 425.4  | 484.2  | 292.7  | 356.6  | 289.4  | 364.4  | 0.386691056 | 375.65   | 325.775  | 49.875  | 1.153096462 | 0.4111  | -1.132 |
| 103808_at   | 550.1  | 441.6  | 475.5  | 500.6  | 550.2  | 480.2  | 438.7  | 519.1  | 0.883117755 | 491.95   | 497.05   | 5.1     | 0.989739463 | 0.8877  | 1.01   |
| 103809_r_at | 851.6  | 705.1  | 753.2  | 692.4  | 588.2  | 737.2  | 596    | 612.1  | 0.05860511  | 750.575  | 633.375  | 117.2   | 1.185040458 | 0.05176 | -1.186 |
| 103810_at   | 143.4  | 105.3  | 59.4   | 70.6   | 70.1   | 135.1  | 93.4   | 76.9   | 0.97447006  | 94.675   | 93.875   | 0.8     | 1.008521971 | 0.9444  | 1.018  |
| 103811_at   | 313.1  | 294.7  | 244.8  | 351.9  | 257.7  | 300.8  | 242.5  | 265.7  | 0.23725564  | 301.125  | 266.675  | 34.45   | 1.129183463 | 0.2363  | -1.123 |
| 103812_at   | 731.9  | 1108.2 | 818.3  | 766.5  | 939.8  | 838.5  | 631.6  | 820.8  | 0.667889916 | 856.225  | 807.675  | 48.55   | 1.060110812 | 0.6778  | -1.056 |
| 103813_at   | 53.3   | 44.2   | 56     | 65.5   | 59.7   | 77.8   | 41.9   | 69.2   | 0.443300345 | 54.75    | 62.15    | 7.4     | 0.880933226 | 0.5071  | 1.117  |
| 103814_at   | 775.3  | 655.8  | 744.8  | 624.4  | 563.4  | 851.4  | 678.9  | 660.6  | 0.875654811 | 700.075  | 688.575  | 11.5    | 1.016701158 | 0.8197  | 1.024  |
| 103815_at   | 411.3  | 382.1  | 483    | 401.9  | 407    | 475.5  | 415.8  | 388.3  | 0.945274733 | 419.575  | 421.65   | 2.075   | 0.995078857 | 0.9312  | 1.006  |
| 103816_at   | 2330.3 | 2505.9 | 3194.1 | 3059   | 2694.7 | 2013.9 | 2825.1 | 2608   | 0.424135405 | 2772.325 | 2535.425 | 236.9   | 1.093436012 | 0.4401  | -1.093 |
| 103817_at   | 2788   | 2771.5 | 3101.9 | 2672.4 | 3031.8 | 3162.2 | 3156.9 | 2925.3 | 0.083380599 | 2833.45  | 3069.05  | 235.6   | 0.923233574 | 0.07189 | 1.084  |
| 103818_at   | 163.1  | 264.4  | 213.9  | 257.3  | 279.9  | 202    | 235.8  | 291    | 0.411228603 | 224.675  | 252.175  | 27.5    | 0.890948746 | 0.4123  | 1.131  |
| 103819_at   | 78.1   | 52.1   | 70.7   | 85.3   | 72.4   | 59     | 98.2   | 64     | 0.875148112 | 71.55    | 73.4     | 1.85    | 0.97479564  | 0.8878  | 1.023  |
| 103821_at   | 887.3  | 620.1  | 609.5  | 635.9  | 561.8  | 605    | 638    | 512    | 0.204780766 | 688.2    | 579.2    | 109     | 1.188190608 | 0.1584  | -1.177 |
| 103822_at   | 52.5   | 60.4   | 67.1   | 80.2   | 99.5   | 79.6   | 67     | 54.3   | 0.414092736 | 65.05    | 75.1     | 10.05   | 0.866178429 | 0.435   | 1.14   |
| 103823_at   | 554.3  | 635.7  | 569.3  | 631    | 668.1  | 474.7  | 628.5  | 713.1  | 0.695387629 | 597.575  | 621.1    | 23.525  | 0.962123652 | 0.7734  | 1.029  |
| 103824_at   | 79.7   | 74.3   | 216    | 157.6  | 155.8  | 49.5   | 154.9  | 190.3  | 0.904220756 | 131.9    | 137.625  | 5.725   | 0.958401453 | 0.9429  | 1.031  |
| 103825_at   | 201.9  | 108.7  | 153.4  | 177.7  | 120.2  | 65.9   | 158.2  | 98.5   | 0.123446654 | 160.425  | 110.7    | 49.725  | 1.449186992 | 0.1337  | -1.484 |
| 103826_at   | 58.1   | 77.8   | 68.3   | 58.5   | 64.7   | 94.6   | 76.9   | 39.1   | 0.814492223 | 65.675   | 68.825   | 3.15    | 0.954231747 | 0.9805  | 1.005  |
| 103828_at   | 283.4  | 250.1  | 346.3  | 306.5  | 286.3  | 333.8  | 214.2  | 340.4  | 0.937750969 | 296.575  | 293.675  | 2.9     | 1.009874862 | 0.8854  | 1.019  |
| 103829_at   | 150    | 129    | 171.1  | 246.6  | 180.6  | 129.9  | 226.4  | 188.6  | 0.832040181 | 174.175  | 181.375  | 7.2     | 0.960303239 | 0.7873  | 1.052  |
| 103830_at   | 141.1  | 167.6  | 170.8  | 129.8  | 124.5  | 139.8  | 91.7   | 140.1  | 0.112069606 | 152.325  | 124.025  | 28.3    | 1.228179802 | 0.1265  | -1.238 |
| 103831_at   | 92.4   | 58.8   | 63     | 45.2   | 39.5   | 139    | 63.8   | 52.9   | 0.731811281 | 64.85    | 73.8     | 8.95    | 0.878726287 | 0.8878  | 1.046  |
| 103832_at   | 103.7  | 108.3  | 126.6  | 141.9  | 113.7  | 114.3  | 130.3  | 166.4  | 0.496324979 | 120.125  | 131.175  | 11.05   | 0.915761387 | 0.4945  | 1.087  |
| 103833_at   | 26.5   | 25     | 134.2  | 149.5  | 34.7   | 30.5   | 95.8   | 55     | 0.462337885 | 83.8     | 54       | 29.8    | 1.551851852 | 0.7111  | -1.242 |
| 103835_f_at | 4046.4 | 3143.1 | 3249.2 | 3347.6 | 2661.5 | 3161.6 | 3269.2 | 3411.4 | 0.267954137 | 3446.575 | 3125.925 | 320.65  | 1.102577637 | 0.2629  | -1.102 |
| 103836_at   | 381.7  | 273.6  | 348.2  | 309.8  | 361.5  | 475.5  | 244.7  | 316.3  | 0.71231775  | 328.325  | 349.5    | 21.175  | 0.939413448 | 0.7994  | 1.042  |
| 103837_at   | 144    | 91.7   | 66.1   | 91.1   | 74.4   | 160.6  | 90.8   | 75.1   | 0.941804459 | 98.225   | 100.225  | 2       | 0.980044899 | 0.9804  | 1.006  |
| 103838_at   | 149.4  | 129.6  | 135.9  | 112.6  | 109.7  | 172.3  | 70.1   | 69.2   | 0.361343006 | 131.875  | 105.325  | 26.55   | 1.252076905 | 0.2398  | -1.341 |
| 103839_at   | 295.9  | 212.5  | 254.6  | 259.1  | 211.3  | 214.1  | 208.6  | 224.3  | 0.093574673 | 255.525  | 214.575  | 40.95   | 1.190842363 | 0.05254 | -1.183 |
| 103840_at   | 370.9  | 429.9  | 400.1  | 532    | 550    | 366.8  | 406    | 493.2  | 0.715666527 | 433.225  | 454      | 20.775  | 0.954240088 | 0.7294  | 1.045  |
| 103841_at   | 121.7  | 94.8   | 113.6  | 114.1  | 108.4  | 104    | 119.8  | 132.8  | 0.568689323 | 111.05   | 116.25   | 5.2     | 0.955268817 | 0.5746  | 1.046  |
| 103842_at   | 902    | 777.4  | 937    | 800.1  | 878.1  | 825.5  | 1011.5 | 933    | 0.336914595 | 854.125  | 912.025  | 57.9    | 0.936514898 | 0.3345  | 1.068  |
| 103843_at   | 354    | 249.4  | 224    | 348.3  | 239.2  | 378.3  | 289.6  | 243.9  | 0.898650521 | 293.925  | 287.75   | 6.175   | 1.0214596   | 0.9092  | -1.019 |
| 103844_at   | 7.8    | 9.5    | 5.6    | 13.2   | 9.1    | 8.4    | 10.6   | 10.2   | 0.761806406 | 9.025    | 9.575    | 0.55    | 0.942558747 | 0.6003  | 1.109  |
| 103845_at   | 1080.8 | 756.3  | 782    | 718.3  | 672.2  | 807.6  | 790.2  | 660.8  | 0.326443576 | 834.35   | 732.7    | 101.65  | 1.138733452 | 0.3002  | -1.128 |
| 103846_at   | 1154   | 1250.7 | 1288.5 | 736.5  | 728.7  | 839.4  | 632.3  | 605.6  | 0.041634767 | 1107.425 | 701.5    | 405.925 | 1.578652887 | 0.02571 | -1.555 |
| 103847_at   | 5.7    | 18.2   | 26     | 30     | 36.4   | 60.9   | 22.9   | 39.3   | 0.087693664 | 19.975   | 39.875   | 19.9    | 0.500940439 | 0.1093  | 2.231  |
| 103848_at   | 396.8  | 360.7  | 661.7  | 599.1  | 437    | 331.4  | 462    | 499.4  | 0.427281589 | 504.575  | 432.45   | 72.125  | 1.166782287 | 0.4766  | -1.141 |
| 103849_at   | 100.5  | 29.4   | 77.4   | 82.8   | 40     | 73.6   | 92     | 100.2  | 0.852713206 | 72.525   | 76.45    | 3.925   | 0.948659254 | 0.8026  | 1.094  |
| 103850_at   | 137.3  | 195.4  | 149.4  | 200.1  | 159.9  | 151.9  | 159.5  | 157.4  | 0.463889009 | 170.55   | 157.175  | 13.375  | 1.08509623  | 0.5006  | -1.071 |
| 103852_at   | 665.1  | 680.4  | 707.8  | 648.7  | 708.9  | 799.6  | 650.7  | 659.2  | 0.471104713 | 675.5    | 704.6    | 29.1    | 0.958699972 | 0.4683  | 1.04   |
| 103853_at   | 196.4  | 194.7  | 308    | 307    | 214.8  | 199.9  | 278.4  | 214    | 0.533074772 | 251.525  | 226.775  | 24.75   | 1.109139014 | 0.5849  | -1.09  |
| 103854_at   | 475.6  | 433.7  | 387.6  | 362.6  | 393.7  | 567.4  | 351    | 426.9  | 0.72502603  | 414.875  | 434.75   | 19.875  | 0.954284071 | 0.7727  | 1.037  |
| 103855_at   | 216.8  | 216.2  | 223.3  | 283.5  | 179.6  | 180.7  | 224.1  | 257.4  | 0.362711537 | 234.95   | 210.45   | 24.5    | 1.116417201 | 0.3328  | -1.122 |
| 103858_at   | 630.2  | 674.4  | 645    | 491.4  | 648.2  | 635.9  | 488.4  | 600.2  | 0.76504718  | 610.25   | 593.175  | 17.075  | 1.028785771 | 0.787   | -1.028 |
| 103859_at   | 375.8  | 282.9  | 303.6  | 287.4  | 207.6  | 296.6  | 291.5  | 297.2  | 0.249666479 | 312.425  | 273.225  | 39.2    | 1.143471498 | 0.2543  | -1.148 |
| 103860_at   | 11     | 8      | 2.8    | 6.2    | 5.2    | 7.6    | 2.7    | 8.2    | 0.632570934 | 7        | 5.925    | 1.075   | 1.181434599 | 0.7417  | -1.143 |
| 103861_s_at | 694.4  | 714.4  | 834.2  | 856    | 557.9  | 599.8  | 794.6  | 705.8  | 0.156016442 | 774.75   | 664.525  | 110.225 | 1.165870359 | 0.1487  | -1.172 |
| 103862_r_at | 541.9  | 535.1  | 561.1  | 564.4  | 584.9  | 513.8  | 541    | 581.4  | 0.813702093 | 550.625  | 555.275  | 4.65    | 0.991625771 | 0.8366  | -1.007 |
| 103863_at   | 2258.5 | 2484.2 | 1850.1 | 1886.9 | 2062.5 | 2627.9 | 1956.8 | 2062.3 | 0.798673264 | 2119.925 | 2177.375 | 57.45   | 0.973615018 | 0.7861  | 1.028  |
| 103865_at   | 63.7   | 35.9   | 26.7   | 28.9   | 39.3   | 53.2   | 18.8   | 51.4   | 0.877316453 | 38.8     | 40.675   | 1.875   | 0.953902889 | 0.9167  | 1.035  |



|             |        |        |        |        |        |        |        |        |             |          |          |         |             |          |        |
|-------------|--------|--------|--------|--------|--------|--------|--------|--------|-------------|----------|----------|---------|-------------|----------|--------|
| 103866_at   | 27.3   | 35.9   | 96.7   | 153.2  | 51     | 39.5   | 28.1   | 105.6  | 0.543273897 | 78.275   | 56.05    | 22.225  | 1.396520963 | 0.6679   | -1.25  |
| 103867_at   | 141.7  | 108.5  | 98.2   | 100    | 69.8   | 127.5  | 146.7  | 111.4  | 0.931045251 | 112.1    | 113.85   | 1.75    | 0.984628898 | 0.9603   | 1.009  |
| 103868_at   | 101.7  | 108.5  | 113.5  | 134.6  | 124.9  | 78.5   | 102.2  | 112.5  | 0.442164713 | 114.575  | 104.525  | 10.05   | 1.096149247 | 0.421    | -1.105 |
| 103869_at   | 563.5  | 569.2  | 585.7  | 595.5  | 535    | 730.5  | 650.6  | 603.4  | 0.301112025 | 578.475  | 629.875  | 51.4    | 0.918396507 | 0.2811   | 1.082  |
| 103871_at   | 419.4  | 416.9  | 661.5  | 594.2  | 607    | 377.5  | 734.1  | 636.2  | 0.52727974  | 523      | 588.7    | 65.7    | 0.888398165 | 0.5753   | 1.117  |
| 103872_r_at | 69.6   | 58.9   | 46.9   | 69.2   | 41.5   | 66.6   | 53.8   | 70.6   | 0.734587376 | 61.15    | 58.125   | 3.025   | 1.052043011 | 0.7138   | -1.06  |
| 103873_i_at | 1013.5 | 1300.2 | 1061.3 | 1179.9 | 1373.5 | 1159.9 | 1309.6 | 1205.1 | 0.180161901 | 1138.725 | 1262.025 | 123.3   | 0.902299875 | 0.171    | 1.111  |
| 103874_r_at | 48.5   | 64.3   | 33.6   | 41     | 51.7   | 53.7   | 65.2   | 70.7   | 0.148805483 | 46.85    | 60.325   | 13.475  | 0.776626606 | 0.1323   | 1.314  |
| 103875_at   | 437.5  | 448.5  | 585.3  | 613.7  | 557.3  | 506.4  | 648.2  | 599    | 0.347279895 | 521.25   | 577.725  | 56.475  | 0.902245878 | 0.3232   | 1.117  |
| 103876_at   | 1360.9 | 1028.5 | 1141.6 | 1070.5 | 1066.9 | 1220.2 | 1201.5 | 960.3  | 0.705056116 | 1150.375 | 1112.225 | 38.15   | 1.034300614 | 0.7106   | -1.033 |
| 103877_at   | 519.1  | 534.9  | 487.4  | 441.8  | 610.5  | 459.6  | 411.3  | 497.3  | 0.982018324 | 495.8    | 494.675  | 1.125   | 1.00227422  | 0.9159   | 1.01   |
| 103878_at   | 1535.5 | 1647.4 | 1601.7 | 1744.1 | 1645   | 1879.6 | 1769   | 1744.5 | 0.09871043  | 1632.175 | 1759.525 | 127.35  | 0.927622512 | 0.09739  | 1.078  |
| 103879_at   | 775.6  | 557.8  | 617.4  | 436.4  | 593.5  | 697.9  | 453.3  | 521    | 0.742159972 | 596.8    | 566.425  | 30.375  | 1.053625811 | 0.781    | -1.045 |
| 103881_at   | 312.3  | 354.1  | 396.4  | 466.3  | 380.7  | 399.8  | 406.9  | 458.7  | 0.46740138  | 382.275  | 411.525  | 29.25   | 0.928922909 | 0.4148   | 1.086  |
| 103882_at   | 51.8   | 103.8  | 86.5   | 109.3  | 82.6   | 85.8   | 61.2   | 68.3   | 0.397996049 | 87.85    | 74.475   | 13.375  | 1.179590467 | 0.4995   | -1.145 |
| 103884_at   | 448.6  | 501.1  | 423.3  | 451.8  | 460.3  | 533.9  | 414    | 486.3  | 0.584190376 | 456.2    | 473.625  | 17.425  | 0.96320929  | 0.6003   | 1.036  |
| 103885_at   | 634.5  | 463.7  | 478    | 439.4  | 493.5  | 582.8  | 556    | 489.3  | 0.620778679 | 503.9    | 530.4    | 26.5    | 0.950037707 | 0.5494   | 1.061  |
| 103886_at   | 625.3  | 792.3  | 864.6  | 640.3  | 788.9  | 914.8  | 845.8  | 721    | 0.274439703 | 730.625  | 817.625  | 87      | 0.893594252 | 0.2571   | 1.125  |
| 103887_at   | 245.2  | 640.3  | 367.4  | 307.4  | 904.6  | 474.3  | 207.6  | 401.3  | 0.559865075 | 390.075  | 496.95   | 106.875 | 0.784938123 | 0.6482   | 1.192  |
| 103888_at   | 518.3  | 489.5  | 744.3  | 754.4  | 345.7  | 577.1  | 505.5  | 437.7  | 0.119787042 | 626.625  | 466.5    | 160.125 | 1.343247588 | 0.1153   | -1.34  |
| 103889_at   | 269.2  | 262.4  | 367.5  | 380.9  | 285.7  | 521    | 352.8  | 396.7  | 0.291537237 | 320      | 389.05   | 69.05   | 0.822516386 | 0.2877   | 1.205  |
| 103890_at   | 256.1  | 297.8  | 306.1  | 244.4  | 237.2  | 233.4  | 261.8  | 285.6  | 0.311336072 | 276.1    | 254.5    | 21.6    | 1.084872299 | 0.3117   | -1.084 |
| 103891_i_at | 666.7  | 758.6  | 745.6  | 954.7  | 935.6  | 586    | 816    | 1022.9 | 0.62429015  | 781.4    | 840.125  | 58.725  | 0.930099688 | 0.6908   | 1.062  |
| 103892_r_at | 147.7  | 82.5   | 119.8  | 93.1   | 162.3  | 115.9  | 123    | 195.3  | 0.157018414 | 110.775  | 149.125  | 38.35   | 0.742833194 | 0.1429   | 1.351  |
| 103893_at   | 922.6  | 973.6  | 920.8  | 953    | 1062.2 | 1016.7 | 924.6  | 933.1  | 0.309721062 | 942.5    | 984.15   | 41.65   | 0.957679216 | 0.293    | 1.043  |
| 103894_at   | 1002   | 1415.4 | 903.1  | 988.8  | 1255.4 | 1759.3 | 728.8  | 975.4  | 0.699867045 | 1077.325 | 1179.725 | 102.4   | 0.91320011  | 0.8082   | 1.055  |
| 103895_at   | 980.6  | 943.9  | 1175.2 | 1049.8 | 987.1  | 864    | 1049.1 | 824.3  | 0.19622001  | 1037.375 | 931.125  | 106.25  | 1.114109276 | 0.1903   | -1.115 |
| 103896_f_at | 11.6   | 6.2    | 1.9    | 7.6    | 17.8   | 4.2    | 9      | 35.4   | 0.252982713 | 6.825    | 16.6     | 9.775   | 0.411144578 | 0.2316   | 2.242  |
| 103897_r_at | 19.6   | 40.4   | 3.6    | 42.2   | 15.9   | 79     | 42.6   | 61.8   | 0.209316912 | 26.45    | 49.825   | 23.375  | 0.530858003 | 0.2652   | 2.297  |
| 103899_at   | 303.3  | 356.6  | 417.6  | 608.4  | 445.7  | 277.9  | 585    | 562    | 0.650058121 | 421.475  | 467.65   | 46.175  | 0.901261627 | 0.6797   | 1.103  |
| 103900_at   | 367.6  | 325.4  | 392.7  | 387.5  | 293.6  | 279    | 224.3  | 297.7  | 0.006154693 | 368.3    | 273.65   | 94.65   | 1.345879773 | 0.008666 | -1.351 |
| 103901_at   | 258.6  | 296.1  | 285    | 277.7  | 363.5  | 295.9  | 395.7  | 299.5  | 0.090061942 | 279.35   | 338.65   | 59.3    | 0.824892957 | 0.05346  | 1.204  |
| 103903_at   | 67.1   | 328.8  | 296.3  | 195.9  | 315.9  | 109.9  | 295.7  | 323.4  | 0.632493903 | 222.025  | 261.225  | 39.2    | 0.849937793 | 0.6135   | 1.269  |
| 103904_at   | 2839.8 | 3079.8 | 2052.1 | 2282.6 | 2356.5 | 2316   | 2148.6 | 2093.2 | 0.257484242 | 2563.575 | 2228.575 | 335     | 1.150320272 | 0.2408   | -1.137 |
| 103905_at   | 183.2  | 85.6   | 95.2   | 120.2  | 98.1   | 119.1  | 102.1  | 105.1  | 0.549285944 | 121.05   | 106.1    | 14.95   | 1.140904807 | 0.6248   | -1.094 |
| 103906_f_at | 312.1  | 292.3  | 359.5  | 394.1  | 358.6  | 307.1  | 273    | 427.8  | 0.960368358 | 339.5    | 341.625  | 2.125   | 0.993779729 | 0.9923   | 1.001  |
| 103907_at   | 142.7  | 177.7  | 173.3  | 291.5  | 168.7  | 137    | 199    | 174.1  | 0.4914998   | 196.3    | 169.7    | 26.6    | 1.156747201 | 0.5178   | -1.124 |
| 103908_at   | 300.2  | 294    | 334.3  | 437.7  | 288.1  | 300.8  | 328.3  | 397.7  | 0.767491053 | 341.55   | 328.725  | 12.825  | 1.039014374 | 0.7852   | -1.034 |
| 103909_at   | 543.4  | 442.2  | 477.2  | 351.3  | 428.1  | 510.7  | 477.5  | 405.7  | 0.967824055 | 453.525  | 455.5    | 1.975   | 0.995664105 | 0.9094   | -1.013 |
| 103910_at   | 1029.7 | 1028.5 | 1168.8 | 924.2  | 1171   | 1121.8 | 956.7  | 850.2  | 0.890953118 | 1037.8   | 1024.925 | 12.875  | 1.012561895 | 0.8525   | -1.017 |
| 103911_at   | 169.6  | 213.1  | 255.4  | 215.7  | 216.9  | 240.8  | 255.5  | 195.6  | 0.555691668 | 213.45   | 227.2    | 13.75   | 0.939480634 | 0.5336   | 1.07   |
| 103912_at   | 214.5  | 164.4  | 216.8  | 225.4  | 245.4  | 237.1  | 170.2  | 208.1  | 0.66711945  | 205.275  | 215.2    | 9.925   | 0.953880112 | 0.6986   | 1.046  |
| 103913_at   | 967.4  | 891.4  | 1096.3 | 1125.4 | 1081.8 | 889.2  | 1069.4 | 1147.1 | 0.743099932 | 1020.125 | 1046.875 | 26.75   | 0.974447761 | 0.7501   | 1.026  |
| 103914_at   | 500.1  | 439.4  | 511.8  | 545.6  | 552.2  | 581    | 592.3  | 655.7  | 0.021419599 | 499.225  | 595.3    | 96.075  | 0.838610784 | 0.02245  | 1.194  |
| 103916_at   | 456.2  | 542.6  | 481.9  | 471.2  | 548.2  | 582.2  | 555.7  | 494.7  | 0.073178756 | 487.975  | 545.2    | 57.225  | 0.895038518 | 0.07189  | 1.118  |
| 103918_at   | 76.7   | 41     | 64.9   | 45.5   | 89.2   | 121.1  | 46.1   | 86.3   | 0.167029368 | 57.025   | 85.675   | 28.65   | 0.665596732 | 0.1775   | 1.466  |
| 103921_i_at | 491.1  | 395.1  | 394.8  | 449.8  | 450    | 529.4  | 396.9  | 406.4  | 0.74634073  | 432.7    | 445.675  | 12.975  | 0.970886857 | 0.7579   | 1.028  |
| 103922_f_at | 445.7  | 354.9  | 587    | 543.7  | 655.5  | 409.9  | 537.7  | 477.9  | 0.62891096  | 482.825  | 520.25   | 37.425  | 0.928063431 | 0.6202   | 1.081  |
| 103923_at   | 160.9  | 163.4  | 199.4  | 191.3  | 162    | 222.6  | 257.5  | 259.2  | 0.131607201 | 178.75   | 225.325  | 46.575  | 0.793298569 | 0.125    | 1.245  |
| 103924_at   | 834.5  | 850.2  | 910    | 784.8  | 765.7  | 874.9  | 807.3  | 829.9  | 0.488252233 | 844.875  | 819.45   | 25.425  | 1.031026908 | 0.49     | -1.031 |
| 103925_at   | 446.5  | 296.3  | 348.7  | 358.3  | 436.8  | 536.6  | 447.9  | 374.7  | 0.106901439 | 362.45   | 449      | 86.55   | 0.807238307 | 0.1008   | 1.242  |
| 103926_at   | 148.8  | 130.9  | 238.3  | 339.2  | 56.2   | 126    | 376    | 247    | 0.884149982 | 214.3    | 201.3    | 13      | 1.064580229 | 0.6583   | -1.244 |
| 103927_at   | 315.1  | 321.5  | 384.9  | 444.1  | 358.8  | 318.1  | 298.3  | 452.1  | 0.840982246 | 366.4    | 356.825  | 9.575   | 1.026833882 | 0.8177   | -1.03  |
| 103928_at   | 203.2  | 155.1  | 203.5  | 189.6  | 164.5  | 223    | 225.6  | 158.5  | 0.82314322  | 187.85   | 192.9    | 5.05    | 0.973820632 | 0.8738   | 1.019  |
| 103930_at   | 417.9  | 273.6  | 460.9  | 542.3  | 339.5  | 417.5  | 451.2  | 435.4  | 0.845296466 | 423.675  | 410.9    | 12.775  | 1.03109029  | 0.9685   | 1.007  |
| 103931_at   | 217    | 170.1  | 180    | 181.7  | 136.3  | 279.7  | 154.9  | 233.7  | 0.714220815 | 187.2    | 201.15   | 13.95   | 0.93064877  | 0.8564   | 1.034  |



|             |        |        |        |        |        |        |        |        |             |          |         |         |             |          |        |
|-------------|--------|--------|--------|--------|--------|--------|--------|--------|-------------|----------|---------|---------|-------------|----------|--------|
| 103932_at   | 1177.8 | 1273   | 1360.4 | 1452.9 | 1967.2 | 1525.5 | 1406.4 | 1509.3 | 0.101882009 | 1316.025 | 1602.1  | 286.075 | 0.821437488 | 0.06821  | 1.211  |
| 103933_at   | 456.9  | 291.7  | 242    | 335.8  | 345.5  | 441.2  | 398.5  | 306.1  | 0.48401441  | 331.6    | 372.825 | 41.225  | 0.889425334 | 0.4203   | 1.145  |
| 103934_at   | 78.4   | 84.3   | 122.1  | 181.5  | 145.7  | 125.6  | 179.9  | 163.5  | 0.227218011 | 116.575  | 153.675 | 37.1    | 0.758581422 | 0.1687   | 1.385  |
| 103935_at   | 495.2  | 442.7  | 490    | 432.1  | 399.1  | 464.2  | 432.5  | 408.1  | 0.123038368 | 465      | 425.975 | 39.025  | 1.091613358 | 0.1205   | -1.092 |
| 103939_at   | 99.5   | 92.7   | 110.8  | 105.4  | 163.8  | 129.1  | 138.3  | 124.4  | 0.017534477 | 102.1    | 138.9   | 36.8    | 0.735061195 | 0.005485 | 1.356  |
| 103941_at   | 36.5   | 40.1   | 36.6   | 78.8   | 4.1    | 10.1   | 2.4    | 3.8    | 0.023541387 | 48       | 5.1     | 42.9    | 9.411764706 | 0.0006   | -10.29 |
| 103942_at   | 36.2   | 131    | 67.3   | 91.5   | 114.3  | 97.2   | 22.7   | 80.4   | 0.922831129 | 81.5     | 78.65   | 2.85    | 1.036236491 | 0.8482   | -1.096 |
| 103943_at   | 14.8   | 17.7   | 8.5    | 21.5   | 16.1   | 27.3   | 14.3   | 18.1   | 0.435984551 | 15.625   | 18.95   | 3.325   | 0.824538259 | 0.4107   | 1.24   |
| 103944_at   | 200.8  | 180.3  | 159.7  | 194.4  | 138.9  | 221.1  | 179    | 240.3  | 0.674810742 | 183.8    | 194.825 | 11.025  | 0.943410753 | 0.7701   | 1.041  |
| 103945_at   | 17.8   | 51.3   | 44.1   | 24.3   | 17.6   | 21.8   | 41.6   | 14.8   | 0.339559034 | 34.375   | 23.95   | 10.425  | 1.435281837 | 0.3314   | -1.427 |
| 103946_at   | 51.5   | 14.7   | 44.5   | 32.6   | 66.1   | 82.4   | 12.5   | 48.2   | 0.381100957 | 35.825   | 52.3    | 16.475  | 0.68499044  | 0.6082   | 1.315  |
| 103947_at   | 826    | 724.4  | 905.1  | 770.9  | 835.7  | 1171.5 | 781.4  | 776.7  | 0.453131854 | 806.6    | 891.325 | 84.725  | 0.904944885 | 0.4479   | 1.092  |
| 103948_at   | 26.6   | 18.2   | 80.5   | 93.8   | 28.4   | 87.5   | 40.3   | 27     | 0.718972416 | 54.775   | 45.8    | 8.975   | 1.195960699 | 0.8805   | -1.079 |
| 103949_at   | 118.1  | 93.9   | 92.4   | 85.7   | 81.5   | 176.8  | 80.2   | 90.2   | 0.714721067 | 97.525   | 107.175 | 9.65    | 0.909960345 | 0.8387   | 1.044  |
| 103950_at   | 87.6   | 29.3   | 45.6   | 38     | 33.9   | 60.5   | 93.2   | 50.5   | 0.619833644 | 50.125   | 59.525  | 9.4     | 0.842083158 | 0.5598   | 1.214  |
| 103952_at   | 5.1    | 7.4    | 2.9    | 7.2    | 7.6    | 18.3   | 25.6   | 18.6   | 0.044599186 | 5.65     | 17.525  | 11.875  | 0.322396576 | 0.01746  | 3.025  |
| 103953_at   | 434.2  | 444.2  | 604    | 585.5  | 536.7  | 565.5  | 697.5  | 480.5  | 0.441583543 | 516.975  | 570.05  | 53.075  | 0.906894132 | 0.4281   | 1.105  |
| 103954_at   | 50.2   | 38.3   | 22.3   | 40.2   | 35.7   | 73.9   | 46.1   | 37.7   | 0.358945916 | 37.75    | 48.35   | 10.6    | 0.780765253 | 0.3447   | 1.278  |
| 103955_at   | 1488.6 | 1329.3 | 1214.7 | 1176.1 | 1722.7 | 1630.4 | 1260.8 | 1296.9 | 0.254297724 | 1302.175 | 1477.7  | 175.525 | 0.881217432 | 0.2492   | 1.129  |
| 103956_at   | 44.3   | 33.8   | 132.4  | 111    | 139    | 45.1   | 42.5   | 98.8   | 0.977809218 | 80.375   | 81.35   | 0.975   | 0.988014751 | 0.9232   | 1.046  |
| 103957_at   | 64.4   | 45.2   | 68.7   | 60.1   | 35.2   | 38.9   | 83.2   | 59.3   | 0.676119023 | 59.6     | 54.15   | 5.45    | 1.100646353 | 0.5358   | -1.155 |
| 103958_g_at | 1506.7 | 1015.2 | 1213.3 | 1351.9 | 971.7  | 1152.7 | 718.1  | 1118.4 | 0.098089781 | 1271.775 | 990.225 | 281.55  | 1.284329319 | 0.1105   | -1.292 |
| 103959_at   | 700.9  | 733.1  | 1119.4 | 1435.6 | 927.9  | 519.1  | 792.4  | 891.2  | 0.330818173 | 997.25   | 782.65  | 214.6   | 1.27419664  | 0.3479   | -1.248 |
| 103960_at   | 146.9  | 86.7   | 178.3  | 173.3  | 199.2  | 204.3  | 160.9  | 139.8  | 0.301655179 | 146.3    | 176.05  | 29.75   | 0.831013917 | 0.3094   | 1.235  |
| 103961_s_at | 42.1   | 67.5   | 25.1   | 10.4   | 82.6   | 14.6   | 6.3    | 43.9   | 0.97929743  | 36.275   | 36.85   | 0.575   | 0.984396201 | 0.7841   | -1.222 |
| 103962_at   | 40.1   | 29.8   | 18.2   | 24.7   | 41.1   | 64.1   | 29.8   | 21.3   | 0.348140994 | 28.2     | 39.075  | 10.875  | 0.72168906  | 0.3644   | 1.326  |
| 103963_f_at | 40.3   | 32.8   | 35.4   | 74.9   | 72.8   | 146.4  | 47.1   | 136.6  | 0.104197905 | 45.85    | 100.725 | 54.875  | 0.455199801 | 0.06441  | 2.103  |
| 103964_at   | 410.2  | 329.2  | 303.1  | 323.9  | 263.8  | 455.8  | 278.2  | 273.7  | 0.668013316 | 341.6    | 317.875 | 23.725  | 1.074636256 | 0.5475   | -1.097 |
| 103965_at   | 318.1  | 323    | 290.8  | 341.3  | 324.2  | 332.4  | 278    | 310.8  | 0.677326605 | 318.3    | 311.35  | 6.95    | 1.022322145 | 0.675    | -1.023 |
| 103967_at   | 42.2   | 54.9   | 66.1   | 56.5   | 39.3   | 43     | 91.1   | 62     | 0.774775081 | 54.925   | 58.85   | 3.925   | 0.933305013 | 0.9129   | 1.025  |
| 103968_at   | 42.9   | 24.6   | 34.5   | 36.4   | 18.4   | 48     | 60.7   | 33.8   | 0.599245368 | 34.6     | 40.225  | 5.625   | 0.860161591 | 0.7926   | 1.081  |
| 103969_at   | 575.6  | 701    | 906.8  | 963.8  | 709.3  | 497.6  | 824.9  | 821.9  | 0.559084963 | 786.8    | 713.425 | 73.375  | 1.102848933 | 0.5856   | -1.102 |
| 103970_at   | 191.2  | 189.4  | 200.4  | 215    | 219.5  | 191.1  | 141.8  | 204.1  | 0.610695594 | 199      | 189.125 | 9.875   | 1.052214144 | 0.5544   | -1.065 |
| 103971_at   | 276.3  | 258.6  | 254.7  | 233    | 214.1  | 311.8  | 222.3  | 205.2  | 0.548453757 | 255.65   | 238.35  | 17.3    | 1.072582337 | 0.4482   | -1.086 |
| 103972_at   | 4.8    | 4      | 3      | 4.3    | 3.4    | 4      | 3.8    | 4.9    | 1           | 4.025    | 4.025   | 0       | 1           | 0.9801   | 1.003  |
| 103973_at   | 58.1   | 24.3   | 35.7   | 8.8    | 40.2   | 86.8   | 24.9   | 34.9   | 0.420225327 | 31.725   | 46.7    | 14.975  | 0.679336188 | 0.3549   | 1.617  |
| 103974_at   | 36.2   | 51.6   | 38.5   | 22.3   | 37.2   | 91.8   | 26.7   | 40.2   | 0.494707107 | 37.15    | 48.975  | 11.825  | 0.758550281 | 0.5355   | 1.23   |
| 103975_at   | 418.7  | 489.6  | 755.6  | 567.9  | 498.8  | 481.8  | 565.4  | 644.7  | 0.905139164 | 557.95   | 547.675 | 10.275  | 1.018761127 | 0.9944   | -1.001 |
| 103976_at   | 19.3   | 12.1   | 33.8   | 4.2    | 26.7   | 60.3   | 13.7   | 45.5   | 0.171808924 | 17.35    | 36.55   | 19.2    | 0.474692202 | 0.1708   | 2.355  |
| 103977_at   | 31.2   | 21.5   | 12.4   | 6.8    | 17.5   | 23.4   | 17.5   | 27.3   | 0.586698866 | 17.975   | 21.425  | 3.45    | 0.838973162 | 0.4111   | 1.362  |
| 103978_at   | 388.2  | 330.7  | 361.7  | 420.2  | 238    | 404    | 410.3  | 414.8  | 0.86622436  | 375.2    | 366.775 | 8.425   | 1.022970486 | 0.7722   | -1.045 |
| 103980_at   | 292.7  | 190    | 322.1  | 318.7  | 207.7  | 148.6  | 176.5  | 232.4  | 0.05657779  | 280.875  | 191.3   | 89.575  | 1.468243596 | 0.05521  | -1.457 |
| 103981_at   | 391.9  | 363.9  | 483.5  | 553.4  | 470.5  | 388.1  | 504.1  | 516.7  | 0.694215529 | 448.175  | 469.85  | 21.675  | 0.953868256 | 0.6516   | 1.057  |
| 103982_s_at | 8.3    | 19.5   | 15.3   | 10.8   | 2      | 11     | 14.2   | 8.7    | 0.255416023 | 13.475   | 8.975   | 4.5     | 1.501392758 | 0.2752   | -1.769 |
| 103983_at   | 71.1   | 16.4   | 17.4   | 14.4   | 7.9    | 9.9    | 3.8    | 8.8    | 0.204917778 | 29.825   | 7.6     | 22.225  | 3.924342105 | 0.03423  | -3.254 |
| 103984_at   | 4.7    | 1.9    | 0.8    | 2.2    | 1.9    | 3.8    | 1.8    | 1.8    | 0.940786634 | 2.4      | 2.325   | 0.075   | 1.032258065 | 0.8402   | 1.087  |
| 103985_at   | 9.3    | 9.9    | 35.5   | 22.3   | 21.6   | 9.2    | 8.8    | 34.6   | 0.938518942 | 19.25    | 18.55   | 0.7     | 1.037735849 | 0.9229   | -1.048 |
| 103986_at   | 248.1  | 150.6  | 181.7  | 185    | 130.6  | 269.1  | 180.7  | 139.8  | 0.775847341 | 191.35   | 180.05  | 11.3    | 1.062760344 | 0.6698   | -1.091 |
| 103987_at   | 4.1    | 18     | 2      | 3.8    | 3.4    | 6      | 4.4    | 3.5    | 0.52864133  | 6.975    | 4.325   | 2.65    | 1.612716763 | 0.7645   | -1.163 |
| 103988_at   | 334.2  | 303.5  | 271.1  | 356.8  | 238.1  | 368.5  | 295.5  | 378.7  | 0.924321595 | 316.4    | 320.2   | 3.8     | 0.988132417 | 0.9991   | 1      |
| 103989_at   | 275.5  | 379.8  | 313.1  | 375.8  | 434    | 328.7  | 402.5  | 408.5  | 0.142618006 | 336.05   | 393.425 | 57.375  | 0.854165343 | 0.1514   | 1.175  |
| 103990_at   | 353.6  | 180.3  | 223.3  | 315.2  | 168.6  | 435.7  | 238.5  | 213.8  | 0.957852801 | 268.1    | 264.15  | 3.95    | 1.014953625 | 0.8647   | -1.046 |
| 103991_at   | 230.4  | 178.9  | 135.3  | 178.4  | 154.1  | 230.5  | 153.3  | 178.8  | 0.954668073 | 180.75   | 179.175 | 1.575   | 1.008790289 | 0.9714   | 1.005  |
| 103992_f_at | 77.2   | 63.2   | 41.5   | 62.9   | 67.1   | 99.6   | 86.3   | 59.2   | 0.203984162 | 61.2     | 78.05   | 16.85   | 0.784112748 | 0.2099   | 1.28   |
| 103993_at   | 165.2  | 162.7  | 189.4  | 169.3  | 197.5  | 169.5  | 186    | 132.7  | 0.989015664 | 171.65   | 171.425 | 0.225   | 1.001312527 | 0.9159   | 1.01   |
| 103994_at   | 228    | 224.7  | 193.5  | 650.6  | 172.3  | 182.7  | 510.1  | 444.6  | 0.982390608 | 324.2    | 327.425 | 3.225   | 0.990150416 | 0.9515   | 1.026  |



|           |        |        |        |        |        |        |        |        |             |          |          |         |             |          |        |
|-----------|--------|--------|--------|--------|--------|--------|--------|--------|-------------|----------|----------|---------|-------------|----------|--------|
| 103995_at | 10     | 2.9    | 4.5    | 5.2    | 6.3    | 5.3    | 3.2    | 5.6    | 0.757618832 | 5.65     | 5.1      | 0.55    | 1.107843137 | 0.9167   | -1.033 |
| 103997_at | 129.2  | 89.1   | 56.5   | 123.8  | 130.5  | 76.2   | 117.9  | 142.8  | 0.469598345 | 99.65    | 116.85   | 17.2    | 0.852802739 | 0.4689   | 1.201  |
| 103998_at | 104.8  | 132.1  | 201.3  | 173.3  | 159.6  | 150.8  | 180.2  | 178.9  | 0.559151927 | 152.875  | 167.375  | 14.5    | 0.913368185 | 0.463    | 1.126  |
| 103999_at | 150.4  | 176.2  | 188.3  | 180.1  | 154.5  | 180    | 150.1  | 172.7  | 0.419804615 | 173.75   | 164.325  | 9.425   | 1.05735585  | 0.4324   | -1.057 |
| 104000_at | 203.5  | 168.2  | 155.1  | 179    | 184.8  | 253.8  | 213.3  | 193.5  | 0.114770976 | 176.45   | 211.35   | 34.9    | 0.834871067 | 0.09715  | 1.195  |
| 104001_at | 115    | 101.7  | 62.1   | 106.6  | 90.2   | 97     | 97.9   | 71     | 0.607660218 | 96.35    | 89.025   | 7.325   | 1.082280258 | 0.7147   | -1.063 |
| 104002_at | 1471.4 | 1359.6 | 1526.3 | 1579.1 | 1216.9 | 1120.8 | 1278.2 | 1301.1 | 0.006537792 | 1484.1   | 1229.25  | 254.85  | 1.207321538 | 0.00659  | -1.207 |
| 104003_at | 359.1  | 277.9  | 223.8  | 348.5  | 252.8  | 257.1  | 265.4  | 277.8  | 0.308217385 | 302.325  | 263.275  | 39.05   | 1.148323996 | 0.3219   | -1.129 |
| 104004_at | 282.8  | 295.6  | 390.3  | 428.4  | 376    | 335.9  | 450.7  | 453.9  | 0.27941447  | 349.275  | 404.125  | 54.85   | 0.864274667 | 0.2682   | 1.166  |
| 104005_at | 465.4  | 363.1  | 453.1  | 370    | 321.2  | 507    | 465.4  | 371.7  | 0.948317044 | 412.9    | 416.325  | 3.425   | 0.991773254 | 0.9919   | 1.001  |
| 104006_at | 296.3  | 325.5  | 392.8  | 316.4  | 239.9  | 307.3  | 295.2  | 205.7  | 0.067975442 | 332.75   | 262.025  | 70.725  | 1.269916993 | 0.06921  | -1.279 |
| 104007_at | 302.8  | 233.9  | 444.1  | 475.8  | 307.7  | 327.3  | 420.4  | 559    | 0.644140503 | 364.15   | 403.6    | 39.45   | 0.902254708 | 0.6139   | 1.121  |
| 104008_at | 13     | 10.2   | 8.1    | 10.1   | 10.7   | 15.6   | 5.8    | 7.7    | 0.873237272 | 10.35    | 9.95     | 0.4     | 1.040201005 | 0.7097   | -1.095 |
| 104010_at | 572.6  | 596.5  | 462.2  | 271.9  | 591.9  | 630    | 375    | 439.4  | 0.74049644  | 475.8    | 509.075  | 33.275  | 0.93463635  | 0.6957   | 1.094  |
| 104011_at | 102.8  | 70.4   | 67.9   | 78.1   | 114.3  | 125.2  | 116.9  | 125.5  | 0.010031845 | 79.8     | 120.475  | 40.675  | 0.662378087 | 0.004621 | 1.529  |
| 104012_at | 1.8    | 14.7   | 1.5    | 4      | 2.3    | 2.7    | 1.4    | 3.4    | 0.401393282 | 5.5      | 2.45     | 3.05    | 2.244897959 | 0.4638   | -1.54  |
| 104013_at | 6.3    | 14     | 3.1    | 5      | 4.1    | 6.7    | 6.2    | 7.4    | 0.711683649 | 7.1      | 6.1      | 1       | 1.163934426 | 0.96     | 1.018  |
| 104014_at | 340.3  | 340.6  | 287.5  | 314.9  | 360.1  | 310.3  | 304.6  | 365.8  | 0.510287894 | 320.825  | 335.2    | 14.375  | 0.957115155 | 0.5219   | 1.044  |
| 104015_at | 1308.6 | 1352.7 | 1340.3 | 1312.8 | 1343   | 1258   | 1164.7 | 1191.5 | 0.107117412 | 1328.6   | 1239.3   | 89.3    | 1.072056806 | 0.0729   | -1.074 |
| 104016_at | 113.7  | 138.1  | 108.9  | 98.5   | 93.3   | 139.7  | 107.5  | 130.6  | 0.833540482 | 114.8    | 117.775  | 2.975   | 0.97473997  | 0.8631   | 1.021  |
| 104017_at | 36.8   | 45.7   | 66.4   | 64.3   | 53.5   | 73.2   | 96.8   | 62.4   | 0.177778135 | 53.3     | 71.475   | 18.175  | 0.745715285 | 0.1674   | 1.348  |
| 104018_at | 36.8   | 47.4   | 50.9   | 59.8   | 65     | 77.2   | 47     | 49.4   | 0.253932171 | 48.725   | 59.65    | 10.925  | 0.816848282 | 0.2531   | 1.216  |
| 104019_at | 354.1  | 299.4  | 456.7  | 647.4  | 434.7  | 360.7  | 471.7  | 442.1  | 0.888176491 | 439.4    | 427.3    | 12.1    | 1.028317341 | 0.955    | 1.01   |
| 104020_at | 369.5  | 258.5  | 222.4  | 426.8  | 172.2  | 252.2  | 418    | 379.4  | 0.85807549  | 319.3    | 305.45   | 13.85   | 1.045342937 | 0.796    | -1.071 |
| 104021_at | 23.3   | 38.5   | 20.4   | 36.9   | 28.8   | 27.9   | 25.5   | 22.4   | 0.500319526 | 29.775   | 26.15    | 3.625   | 1.138623327 | 0.5932   | -1.101 |
| 104022_at | 251.1  | 239.2  | 353.8  | 282.4  | 385.6  | 403.4  | 256.9  | 274.4  | 0.333079956 | 281.625  | 330.075  | 48.45   | 0.853215178 | 0.3378   | 1.163  |
| 104023_at | 266.5  | 228.5  | 178.6  | 212.3  | 211.4  | 373.8  | 243.4  | 175.7  | 0.561763661 | 221.475  | 251.075  | 29.6    | 0.88210694  | 0.6169   | 1.1    |
| 104024_at | 17.8   | 4.9    | 11     | 9.2    | 4.8    | 9.8    | 11.2   | 8.3    | 0.501976832 | 10.725   | 8.525    | 2.2     | 1.258064516 | 0.5991   | -1.197 |
| 104025_at | 393.8  | 331.9  | 460.6  | 395    | 385.8  | 360.9  | 352.8  | 389.3  | 0.455647092 | 395.325  | 372.2    | 23.125  | 1.062130575 | 0.4742   | -1.056 |
| 104029_at | 106.8  | 125.6  | 98     | 125.9  | 119.3  | 134.3  | 111.1  | 114.6  | 0.532936718 | 114.075  | 119.825  | 5.75    | 0.952013353 | 0.5106   | 1.054  |
| 104030_at | 1094.9 | 1439.7 | 1355.9 | 1808.3 | 1205.4 | 1020.6 | 1463.9 | 1719   | 0.744138933 | 1424.7   | 1352.225 | 72.475  | 1.05359685  | 0.7302   | -1.057 |
| 104031_at | 252    | 217.6  | 211.4  | 231.6  | 114.7  | 205.7  | 196.3  | 141.6  | 0.054571075 | 228.15   | 164.575  | 63.575  | 1.38629804  | 0.04999  | -1.422 |
| 104032_at | 12.9   | 15.9   | 24.1   | 26.6   | 26.3   | 20.9   | 17.9   | 15.1   | 0.967024305 | 19.875   | 20.05    | 0.175   | 0.99127182  | 0.8914   | 1.03   |
| 104033_at | 670.2  | 864.4  | 897.4  | 1028.2 | 955.4  | 653.5  | 793.4  | 852.8  | 0.617130242 | 865.05   | 813.775  | 51.275  | 1.063008817 | 0.6407   | -1.061 |
| 104034_at | 112.5  | 40.7   | 62.3   | 97.7   | 63.5   | 71.7   | 73.1   | 60.2   | 0.547524969 | 78.3     | 67.125   | 11.175  | 1.166480447 | 0.7364   | -1.086 |
| 104035_at | 245.5  | 211.9  | 180.8  | 382    | 144    | 189.4  | 355.1  | 346.5  | 0.959536011 | 255.05   | 258.75   | 3.7     | 0.985700483 | 0.9532   | -1.017 |
| 104036_at | 338.3  | 309.8  | 303.7  | 222.6  | 302.8  | 327.1  | 265.7  | 273.2  | 0.962912195 | 293.6    | 292.2    | 1.4     | 1.004791239 | 0.9727   | 1.004  |
| 104037_at | 150.9  | 146    | 136.6  | 152.3  | 86.2   | 144.6  | 138.6  | 128.6  | 0.19483182  | 146.45   | 124.5    | 21.95   | 1.176305221 | 0.186    | -1.198 |
| 104038_at | 1291.3 | 1412   | 1562   | 1523.3 | 1630.6 | 1701   | 1560.5 | 1675.2 | 0.040972574 | 1447.15  | 1641.825 | 194.675 | 0.88142768  | 0.03368  | 1.137  |
| 104039_at | 137.5  | 119.8  | 135.3  | 113.4  | 80.9   | 92.9   | 209.8  | 146.6  | 0.852320007 | 126.5    | 132.55   | 6.05    | 0.954356846 | 0.9239   | -1.022 |
| 104040_at | 70.4   | 19.2   | 10.8   | 34     | 46.5   | 49     | 26.5   | 52.4   | 0.524540525 | 33.6     | 43.6     | 10      | 0.770642202 | 0.3229   | 1.59   |
| 104041_at | 1373.2 | 1294.4 | 1366.5 | 1809.2 | 1253.5 | 1553   | 1228.5 | 1698   | 0.872303079 | 1460.825 | 1433.25  | 27.575  | 1.019239491 | 0.8634   | -1.02  |
| 104042_at | 1276.2 | 1494.5 | 1134.1 | 902.1  | 1224.7 | 1255.5 | 903.3  | 1080.8 | 0.587581361 | 1201.725 | 1116.075 | 85.65   | 1.076742154 | 0.6325   | -1.068 |
| 104044_at | 492.1  | 496.6  | 460.1  | 473.3  | 438.5  | 502.8  | 399    | 423.3  | 0.173078736 | 480.525  | 440.9    | 39.625  | 1.089872987 | 0.138    | -1.093 |
| 104045_at | 83.2   | 83.5   | 112.3  | 71.9   | 87.8   | 108.1  | 155.4  | 119.1  | 0.132128319 | 87.725   | 117.6    | 29.875  | 0.745960884 | 0.1076   | 1.33   |
| 104046_at | 592.8  | 866.4  | 1504.9 | 932.8  | 1276.4 | 483.2  | 1560.2 | 743.9  | 0.898042689 | 974.225  | 1015.925 | 41.7    | 0.958953663 | 0.9958   | 1.002  |
| 104047_at | 1239.1 | 1148.6 | 1106.2 | 1078.2 | 1214.6 | 1201.2 | 1337.7 | 1246.8 | 0.062461541 | 1143.025 | 1250.075 | 107.05  | 0.914365138 | 0.05917  | 1.094  |
| 104048_at | 217.3  | 207.1  | 245.2  | 245    | 272.2  | 175.9  | 281.2  | 253.9  | 0.544090111 | 228.65   | 245.8    | 17.15   | 0.930227828 | 0.6324   | 1.06   |
| 104049_at | 168.5  | 122.7  | 130.5  | 170.3  | 164.9  | 223.9  | 124.8  | 178.5  | 0.343992628 | 148      | 173.025  | 25.025  | 0.855367721 | 0.3619   | 1.157  |
| 104050_at | 2937.5 | 3419   | 2671.4 | 3428.4 | 3158.8 | 2942.1 | 3167.8 | 3019.6 | 0.841191745 | 3114.075 | 3072.075 | 42      | 1.013671541 | 0.8976   | 1.009  |
| 104052_at | 1562.3 | 1234.5 | 1338.4 | 1190.2 | 1312.4 | 1476.2 | 1412.8 | 1338.2 | 0.586495491 | 1331.35  | 1384.9   | 53.55   | 0.961332948 | 0.5305   | 1.045  |
| 104053_at | 566.8  | 488.1  | 492.5  | 654.4  | 488.3  | 451.6  | 601.3  | 653    | 0.976299039 | 550.45   | 548.55   | 1.9     | 1.003463677 | 0.9493   | -1.007 |
| 104055_at | 5.7    | 7.9    | 20.8   | 15.1   | 3.6    | 25.3   | 10.7   | 16.4   | 0.787349209 | 12.375   | 14       | 1.625   | 0.883928571 | 0.9528   | 1.032  |
| 104056_at | 812    | 920.7  | 1189.3 | 937.3  | 1350   | 1080.6 | 1309.7 | 1202.5 | 0.037873102 | 964.825  | 1235.7   | 270.875 | 0.780792263 | 0.03575  | 1.288  |
| 104057_at | 597.9  | 805.3  | 652.1  | 632.9  | 864.9  | 621.7  | 616.5  | 785.8  | 0.539950341 | 672.05   | 722.225  | 50.175  | 0.93052719  | 0.5505   | 1.07   |
| 104058_at | 1162.5 | 1031.9 | 1199.4 | 1221.9 | 1125.9 | 1275.4 | 1246.3 | 1170.4 | 0.391508989 | 1153.925 | 1204.5   | 50.575  | 0.958011623 | 0.3927   | 1.045  |



|             |        |        |        |        |        |        |        |        |             |          |          |         |             |         |        |
|-------------|--------|--------|--------|--------|--------|--------|--------|--------|-------------|----------|----------|---------|-------------|---------|--------|
| 104059_at   | 1351.2 | 1456.3 | 1109.1 | 1199   | 1334.1 | 983.7  | 1113.7 | 1223.2 | 0.32617437  | 1278.9   | 1163.675 | 115.225 | 1.099018197 | 0.3264  | -1.1   |
| 104060_at   | 671.6  | 414.7  | 439.2  | 718.7  | 753.1  | 703.4  | 510    | 458.5  | 0.685437584 | 561.05   | 606.25   | 45.2    | 0.925443299 | 0.6619  | 1.089  |
| 104063_at   | 440.7  | 424.8  | 394.5  | 413.8  | 387.3  | 320    | 400.9  | 394.2  | 0.1043262   | 418.45   | 375.6    | 42.85   | 1.114084132 | 0.1012  | -1.118 |
| 104064_at   | 179.7  | 210.6  | 169.6  | 163.9  | 167.5  | 197.7  | 192.8  | 189.4  | 0.652928422 | 180.95   | 186.85   | 5.9     | 0.968423869 | 0.6198  | 1.035  |
| 104065_at   | 32.2   | 29     | 41.7   | 46     | 35.3   | 33.5   | 38.7   | 37.9   | 0.844737248 | 37.225   | 36.35    | 0.875   | 1.024071527 | 0.9416  | -1.009 |
| 104066_at   | 894.4  | 1003.8 | 1171.8 | 861.4  | 974.2  | 880.7  | 828.1  | 821.3  | 0.238057071 | 982.85   | 876.075  | 106.775 | 1.121878835 | 0.2159  | -1.116 |
| 104067_at   | 448.5  | 552.1  | 536.2  | 607.7  | 646.3  | 575.2  | 562.2  | 653.1  | 0.126701846 | 536.125  | 609.2    | 73.075  | 0.880047603 | 0.1274  | 1.14   |
| 104068_at   | 138.4  | 62.5   | 40.5   | 124.8  | 60     | 60.5   | 144    | 32.8   | 0.628723609 | 91.55    | 74.325   | 17.225  | 1.231752439 | 0.5998  | -1.263 |
| 104069_at   | 2175.2 | 2147.6 | 2042.8 | 2180.6 | 2128.5 | 2264.3 | 1833.8 | 2247.3 | 0.872067284 | 2136.55  | 2118.475 | 18.075  | 1.008532081 | 0.8274  | 1.012  |
| 104070_at   | 396.1  | 477.2  | 486.4  | 532    | 529.3  | 427.6  | 532.5  | 531.2  | 0.432786325 | 472.925  | 505.15   | 32.225  | 0.936207067 | 0.4449  | 1.07   |
| 104071_at   | 1036   | 982.7  | 1206.8 | 1330.4 | 1230.5 | 1071.1 | 994.9  | 1258.8 | 0.998874525 | 1138.975 | 1138.825 | 0.15    | 1.000131715 | 0.9794  | 1.002  |
| 104072_at   | 28.9   | 29.8   | 20     | 11.8   | 13.4   | 26.5   | 11.7   | 32.8   | 0.826164588 | 22.625   | 21.1     | 1.525   | 1.072274882 | 0.7715  | -1.106 |
| 104073_at   | 6.2    | 25     | 21.2   | 40.4   | 14.7   | 27.3   | 21.6   | 27.6   | 0.960763637 | 23.2     | 22.8     | 0.4     | 1.01754386  | 0.7426  | 1.157  |
| 104074_at   | 342.4  | 283.8  | 312.7  | 379.1  | 317.2  | 402.8  | 398.9  | 373.4  | 0.175733663 | 329.5    | 373.075  | 43.575  | 0.883200429 | 0.1816  | 1.134  |
| 104076_at   | 595.3  | 812.9  | 557.3  | 526.5  | 735.7  | 373.7  | 613.4  | 560.2  | 0.618177949 | 623      | 570.75   | 52.25   | 1.091546211 | 0.5772  | -1.107 |
| 104077_at   | 1442.4 | 1241.6 | 938.5  | 919    | 1204.8 | 1334.5 | 1054.1 | 1095.5 | 0.805531062 | 1135.375 | 1172.225 | 36.85   | 0.968564056 | 0.7189  | 1.047  |
| 104078_g_at | 1112.5 | 1096.4 | 958.7  | 760    | 1164.9 | 983.4  | 916.6  | 888.9  | 0.951286902 | 981.9    | 988.45   | 6.55    | 0.993373464 | 0.9126  | 1.012  |
| 104079_at   | 898.6  | 1265.6 | 1649.1 | 2027.5 | 1608.4 | 998.5  | 1445.1 | 1692.4 | 0.936582624 | 1460.2   | 1436.1   | 24.1    | 1.016781561 | 0.9709  | 1.008  |
| 104080_at   | 1522.7 | 1542.2 | 1463.1 | 1384.7 | 1611   | 1295.3 | 1222.1 | 1342.4 | 0.29532633  | 1478.175 | 1367.7   | 110.475 | 1.080774293 | 0.2482  | -1.086 |
| 104082_at   | 783.3  | 761.4  | 984.2  | 1158   | 740.2  | 760.4  | 1031.8 | 1049   | 0.840616387 | 921.725  | 895.35   | 26.375  | 1.029457754 | 0.8484  | -1.028 |
| 104083_at   | 765.2  | 1253.8 | 1173.7 | 1134.6 | 1418.1 | 896.5  | 1163.5 | 1063.4 | 0.739669237 | 1081.825 | 1135.375 | 53.55   | 0.952834966 | 0.7354  | 1.053  |
| 104085_at   | 478.8  | 599.4  | 491.1  | 457.6  | 612.5  | 491.7  | 615.1  | 514.2  | 0.297200308 | 506.725  | 558.375  | 51.65   | 0.90749944  | 0.2867  | 1.102  |
| 104086_at   | 12.5   | 12.2   | 10.6   | 28.3   | 16.7   | 14.9   | 5.3    | 17.6   | 0.668839288 | 15.9     | 13.625   | 2.275   | 1.166972477 | 0.6583  | -1.182 |
| 104087_at   | 732.6  | 718.5  | 721    | 603.5  | 908.9  | 777.7  | 812.7  | 700.2  | 0.097221961 | 693.9    | 799.875  | 105.975 | 0.867510549 | 0.09368 | 1.151  |
| 104088_at   | 727.3  | 798.3  | 450.6  | 508.7  | 608.4  | 611.9  | 545.6  | 604.7  | 0.758391232 | 621.225  | 592.65   | 28.575  | 1.048215642 | 0.891   | 1.02   |
| 104089_at   | 324.1  | 463.4  | 431.7  | 484.3  | 622.9  | 389    | 521.3  | 518.7  | 0.198848152 | 425.875  | 512.975  | 87.1    | 0.83020615  | 0.2154  | 1.202  |
| 104090_at   | 779.5  | 778.4  | 680.8  | 938.5  | 758.8  | 713    | 830    | 730.9  | 0.572498536 | 794.3    | 758.175  | 36.125  | 1.047647311 | 0.5938  | -1.042 |
| 104091_at   | 1563.9 | 1342.4 | 1781.8 | 1739.6 | 1169.4 | 1612.3 | 1439.1 | 1731.1 | 0.480293363 | 1606.925 | 1487.975 | 118.95  | 1.079940859 | 0.476   | -1.085 |
| 104092_at   | 1020.3 | 826.6  | 1113   | 1443.7 | 1074.6 | 1007.2 | 1169.2 | 1437.1 | 0.67318384  | 1100.9   | 1172.025 | 71.125  | 0.939314434 | 0.6157  | 1.076  |
| 104093_at   | 3274.8 | 3668.5 | 2723.5 | 2776   | 2931.6 | 2882.8 | 3084   | 2996.9 | 0.587547867 | 3110.7   | 2973.825 | 136.875 | 1.046026582 | 0.6207  | -1.038 |
| 104094_at   | 1167.5 | 1159.6 | 817.8  | 1033.1 | 1235.7 | 1179.5 | 875.1  | 1029.2 | 0.768713419 | 1044.5   | 1079.875 | 35.375  | 0.967241579 | 0.772   | 1.035  |
| 104095_at   | 458.4  | 441.4  | 547.3  | 602.8  | 408.2  | 504.4  | 464    | 530.7  | 0.475066744 | 512.475  | 476.825  | 35.65   | 1.074765375 | 0.4892  | -1.071 |
| 104096_at   | 479.5  | 518.2  | 554.8  | 589.4  | 572.9  | 542.7  | 552.7  | 556.2  | 0.453701637 | 535.475  | 556.125  | 20.65   | 0.96286806  | 0.4101  | 1.041  |
| 104097_at   | 536    | 537.2  | 608.8  | 934.4  | 723.5  | 584.3  | 720.2  | 667.9  | 0.853455245 | 654.1    | 673.975  | 19.875  | 0.970510776 | 0.7141  | 1.056  |
| 104098_at   | 474.1  | 306.2  | 397.5  | 291.9  | 390.6  | 358.8  | 357.4  | 398.2  | 0.852077237 | 367.425  | 376.25   | 8.825   | 0.97654485  | 0.7318  | 1.043  |
| 104099_at   | 87.3   | 112.5  | 98.2   | 85.4   | 132.2  | 103.7  | 79.2   | 81     | 0.829021435 | 95.85    | 99.025   | 3.175   | 0.96793739  | 0.907   | 1.017  |
| 104100_at   | 2443.4 | 2460.4 | 2376.7 | 2441.1 | 2344   | 2544.4 | 2158.5 | 2589   | 0.844384015 | 2430.4   | 2408.975 | 21.425  | 1.008893824 | 0.798   | 1.011  |
| 104101_at   | 282    | 269.8  | 382.2  | 414.6  | 364.2  | 448.3  | 421.4  | 364.8  | 0.196507901 | 337.15   | 399.675  | 62.525  | 0.843560393 | 0.1763  | 1.201  |
| 104102_at   | 475    | 451.9  | 418.3  | 502.6  | 471    | 419.5  | 545.2  | 524.2  | 0.439011583 | 461.95   | 489.975  | 28.025  | 0.942803204 | 0.458   | 1.058  |
| 104103_at   | 20.6   | 20.1   | 8.7    | 8.2    | 11.4   | 33.3   | 10.5   | 9.6    | 0.798119556 | 14.4     | 16.2     | 1.8     | 0.888888889 | 0.8687  | 1.069  |
| 104104_at   | 22.5   | 32.1   | 15.8   | 38.3   | 36.4   | 24.1   | 38.8   | 28.3   | 0.468933499 | 27.175   | 31.9     | 4.725   | 0.851880878 | 0.4136  | 1.219  |
| 104105_at   | 749.9  | 654    | 872.8  | 1149.3 | 681.4  | 742.2  | 839.7  | 930.1  | 0.652168174 | 856.5    | 798.35   | 58.15   | 1.072837728 | 0.7064  | -1.056 |
| 104106_at   | 370.7  | 352.6  | 323.5  | 804.1  | 394.9  | 335.9  | 607.3  | 804    | 0.657994655 | 462.725  | 535.525  | 72.8    | 0.864058634 | 0.599   | 1.175  |
| 104108_at   | 1003.3 | 1137   | 1027.4 | 1249.2 | 1091.4 | 855    | 1046.8 | 1268.9 | 0.719384983 | 1104.225 | 1065.525 | 38.7    | 1.036320124 | 0.6784  | -1.043 |
| 104109_at   | 762.5  | 851.9  | 966.6  | 1128.9 | 1144.9 | 1009.5 | 1220.7 | 1098.4 | 0.092360787 | 927.475  | 1118.375 | 190.9   | 0.829305913 | 0.08097 | 1.216  |
| 104110_at   | 971.1  | 855    | 1522.9 | 1713.2 | 934.2  | 891.4  | 1140.3 | 1311.6 | 0.439370446 | 1265.55  | 1069.375 | 196.175 | 1.183448276 | 0.4968  | -1.148 |
| 104112_at   | 208.1  | 193.7  | 254.9  | 230.1  | 203.4  | 200.7  | 236.5  | 236.3  | 0.887070172 | 221.7    | 219.225  | 2.475   | 1.011289771 | 0.909   | 1.009  |
| 104114_at   | 480.3  | 536.6  | 734.8  | 532.4  | 576.4  | 581.7  | 722.8  | 707.1  | 0.314591537 | 571.025  | 647      | 75.975  | 0.882573416 | 0.2753  | 1.142  |
| 104115_at   | 571.3  | 601.2  | 812.8  | 805.4  | 802.9  | 568.6  | 793.9  | 807.6  | 0.619495956 | 697.675  | 743.25   | 45.575  | 0.938681467 | 0.6225  | 1.068  |
| 104116_at   | 304.6  | 381.7  | 399.5  | 366.9  | 435.5  | 399.2  | 481    | 482.4  | 0.023880141 | 363.175  | 449.525  | 86.35   | 0.807908348 | 0.02802 | 1.24   |
| 104117_at   | 295    | 302.9  | 292    | 385.1  | 465    | 318.3  | 282.3  | 394.7  | 0.367245052 | 318.75   | 365.075  | 46.325  | 0.873108265 | 0.3745  | 1.132  |
| 104118_at   | 922.6  | 863.9  | 748.6  | 862.7  | 733.3  | 774.5  | 869.5  | 884.2  | 0.533712965 | 849.45   | 815.375  | 34.075  | 1.041790587 | 0.5384  | -1.042 |
| 104119_at   | 692.5  | 560.9  | 775.9  | 899.1  | 571.6  | 520.7  | 806.2  | 797.6  | 0.593509622 | 732.1    | 674.025  | 58.075  | 1.086161493 | 0.5843  | -1.091 |
| 104120_at   | 713.3  | 610.5  | 511.1  | 663.7  | 685.7  | 826.5  | 518    | 545.6  | 0.825848444 | 624.65   | 643.95   | 19.3    | 0.970028729 | 0.8813  | 1.02   |
| 104121_at   | 291.8  | 281.3  | 452.6  | 430.3  | 217.2  | 399.4  | 348.5  | 378.9  | 0.661733505 | 364      | 336      | 28      | 1.083333333 | 0.6723  | -1.087 |
| 104122_at   | 366.4  | 337.2  | 233.3  | 397.9  | 355.3  | 392.2  | 329.4  | 329.3  | 0.668219478 | 333.7    | 351.55   | 17.85   | 0.949224861 | 0.6008  | 1.071  |



|             |        |        |        |        |        |        |        |        |             |          |          |         |             |         |        |
|-------------|--------|--------|--------|--------|--------|--------|--------|--------|-------------|----------|----------|---------|-------------|---------|--------|
| 104123_at   | 26.4   | 42.3   | 93.7   | 53.9   | 98.7   | 82.5   | 70.8   | 80.6   | 0.134516653 | 54.075   | 83.15    | 29.075  | 0.650330728 | 0.1011  | 1.694  |
| 104124_at   | 695.8  | 552.6  | 267.6  | 495.8  | 476.5  | 471.7  | 494.5  | 520.3  | 0.900188293 | 502.95   | 490.75   | 12.2    | 1.024859908 | 0.8836  | 1.032  |
| 104125_at   | 1567.5 | 1482.2 | 1340   | 1233.9 | 1274   | 1443.5 | 1315.5 | 1261.7 | 0.380033316 | 1405.9   | 1323.675 | 82.225  | 1.062118722 | 0.3847  | -1.059 |
| 104126_at   | 835    | 851    | 1010.6 | 800.5  | 927.5  | 911.1  | 861.6  | 800.7  | 0.986813107 | 874.275  | 875.225  | 0.95    | 0.998914565 | 0.956   | 1.004  |
| 104128_at   | 513.7  | 402.5  | 581.6  | 452.7  | 408.7  | 454.4  | 479.4  | 462    | 0.430487803 | 487.625  | 451.125  | 36.5    | 1.080908839 | 0.4492  | -1.073 |
| 104129_at   | 231    | 224.7  | 187.6  | 160    | 285.3  | 194.3  | 223    | 240.9  | 0.216190649 | 200.825  | 235.875  | 35.05   | 0.851404346 | 0.2164  | 1.176  |
| 104131_at   | 131.6  | 116.4  | 136.3  | 118.6  | 121.2  | 111.3  | 114.7  | 113    | 0.113073503 | 125.725  | 115.05   | 10.675  | 1.092785745 | 0.0885  | -1.091 |
| 104132_at   | 742.8  | 739.3  | 690.1  | 718    | 825.6  | 617.1  | 564    | 717.5  | 0.528727032 | 722.55   | 681.05   | 41.5    | 1.06093532  | 0.4485  | -1.072 |
| 104134_at   | 455.5  | 445.7  | 498.7  | 386.7  | 428.7  | 505.5  | 528.2  | 478.7  | 0.265784168 | 446.65   | 485.275  | 38.625  | 0.920405955 | 0.2708  | 1.088  |
| 104135_at   | 935.5  | 1142.6 | 800.3  | 852.5  | 987.1  | 778.8  | 1009.5 | 902    | 0.88931871  | 932.725  | 919.35   | 13.375  | 1.014548322 | 0.9195  | 1.01   |
| 104136_at   | 337.7  | 397.9  | 391.4  | 436.2  | 353.1  | 269.9  | 291    | 348.2  | 0.040980651 | 390.8    | 315.55   | 75.25   | 1.238472508 | 0.04384 | -1.241 |
| 104137_at   | 362.3  | 253.6  | 326.8  | 351    | 199.2  | 271.9  | 264    | 315    | 0.12502123  | 323.425  | 262.525  | 60.9    | 1.231977907 | 0.141   | -1.237 |
| 104138_at   | 18.4   | 108.9  | 100    | 74.5   | 143.6  | 98.6   | 88.5   | 113    | 0.195353428 | 75.45    | 110.925  | 35.475  | 0.680189317 | 0.2356  | 1.754  |
| 104139_at   | 546.5  | 562.7  | 518.3  | 422    | 445.1  | 383.2  | 458.5  | 412.8  | 0.062473749 | 512.375  | 424.9    | 87.475  | 1.20587197  | 0.05306 | -1.201 |
| 104140_s_at | 2882.6 | 2338.8 | 2497.3 | 2629   | 2279.6 | 2578.6 | 2458.7 | 2377.8 | 0.272587197 | 2586.925 | 2423.675 | 163.25  | 1.067356391 | 0.2631  | -1.065 |
| 104141_at   | 468.4  | 432.6  | 542.6  | 565.9  | 386.8  | 508.7  | 395    | 434.7  | 0.140681652 | 502.375  | 431.3    | 71.075  | 1.164792488 | 0.1354  | -1.165 |
| 104142_at   | 215.8  | 267.1  | 306.5  | 317.1  | 305    | 203.4  | 296.7  | 319    | 0.903841967 | 276.625  | 281.025  | 4.4     | 0.98434303  | 0.9333  | 1.012  |
| 104143_at   | 1037.3 | 1187.3 | 1115   | 1005   | 1401.4 | 1183.8 | 1165.7 | 1179.1 | 0.084925128 | 1086.15  | 1232.5   | 146.35  | 0.881257606 | 0.0723  | 1.134  |
| 104144_at   | 453.3  | 546.3  | 689.6  | 709    | 523.9  | 535.3  | 604.4  | 679.2  | 0.852343945 | 599.55   | 585.7    | 13.85   | 1.023646918 | 0.9205  | 1.013  |
| 104145_at   | 509.1  | 426.1  | 583.4  | 622.9  | 391.9  | 465.1  | 478.2  | 475.8  | 0.155607622 | 535.375  | 452.75   | 82.625  | 1.182495859 | 0.147   | -1.174 |
| 104146_at   | 90.9   | 109.4  | 160.9  | 130.3  | 119.7  | 110.1  | 113.5  | 159.8  | 0.883537529 | 122.875  | 125.775  | 2.9     | 0.976942954 | 0.8262  | 1.035  |
| 104147_at   | 857.3  | 789.9  | 768.9  | 703.3  | 686.6  | 818.8  | 757.8  | 702.5  | 0.412587948 | 779.85   | 741.425  | 38.425  | 1.051825876 | 0.4108  | -1.052 |
| 104148_at   | 1031.5 | 993    | 908.5  | 980    | 998.1  | 1121.4 | 1003.2 | 968.1  | 0.338184352 | 978.25   | 1022.7   | 44.45   | 0.956536619 | 0.3339  | 1.045  |
| 104149_at   | 753.8  | 893.6  | 711.7  | 673    | 644.1  | 470.1  | 431.7  | 606.1  | 0.02064083  | 758.025  | 538      | 220.025 | 1.408968401 | 0.02212 | -1.421 |
| 104150_at   | 441.4  | 394.6  | 442.4  | 429.3  | 432.6  | 520.1  | 393.7  | 386.1  | 0.859354438 | 426.925  | 433.125  | 6.2     | 0.985685426 | 0.9135  | 1.008  |
| 104151_at   | 416.7  | 277.3  | 439.7  | 444.4  | 302.1  | 527    | 398.3  | 388.4  | 0.882264532 | 394.525  | 403.95   | 9.425   | 0.976667904 | 0.896   | 1.022  |
| 104152_at   | 1183.2 | 1097.3 | 1185   | 1276.4 | 1232.5 | 1481.2 | 1310.2 | 1527.4 | 0.054905241 | 1185.475 | 1387.825 | 202.35  | 0.854196314 | 0.03981 | 1.168  |
| 104153_at   | 415.6  | 471    | 370.7  | 388.7  | 478.1  | 479.3  | 394.9  | 444.9  | 0.247934124 | 411.5    | 449.3    | 37.8    | 0.91586913  | 0.2449  | 1.093  |
| 104154_at   | 1124.6 | 1056   | 1299.6 | 1133.5 | 940    | 1018.1 | 1031.9 | 1154.5 | 0.137000852 | 1153.425 | 1036.125 | 117.3   | 1.113210279 | 0.1291  | -1.113 |
| 104155_f_at | 154.8  | 184.6  | 156.7  | 210.7  | 156.1  | 189.4  | 166.7  | 192.3  | 0.972458267 | 176.7    | 176.125  | 0.575   | 1.003264727 | 0.9918  | 1.001  |
| 104156_r_at | 30.4   | 19.2   | 17.1   | 55.4   | 29.4   | 22.9   | 18.1   | 65.2   | 0.815730323 | 30.525   | 33.9     | 3.375   | 0.900442478 | 0.8233  | 1.094  |
| 104157_at   | 175.9  | 162.6  | 197    | 183.2  | 244.6  | 154.9  | 203.9  | 231.7  | 0.244404659 | 179.675  | 208.775  | 29.1    | 0.860615495 | 0.2562  | 1.147  |
| 104158_at   | 329    | 566.2  | 475.5  | 503.8  | 463.7  | 396.1  | 671.1  | 653.1  | 0.400694098 | 468.625  | 546      | 77.375  | 0.858287546 | 0.4313  | 1.159  |
| 104159_at   | 4.2    | 19.4   | 5.5    | 5.7    | 7.9    | 9.5    | 17.6   | 10.5   | 0.550369353 | 8.7      | 11.375   | 2.675   | 0.764835165 | 0.3065  | 1.531  |
| 104160_at   | 187.3  | 150.1  | 161.8  | 138    | 157.2  | 204.6  | 175.5  | 141.3  | 0.570322091 | 159.3    | 169.65   | 10.35   | 0.938992042 | 0.5796  | 1.062  |
| 104161_at   | 282.1  | 144.1  | 218.9  | 232.9  | 225.9  | 219.7  | 227.1  | 208    | 0.982763258 | 219.5    | 220.175  | 0.675   | 0.996934257 | 0.8371  | 1.031  |
| 104163_at   | 470.3  | 528.2  | 525.3  | 609.7  | 567.4  | 472.7  | 604.5  | 666.4  | 0.409710823 | 533.375  | 577.75   | 44.375  | 0.923193423 | 0.4273  | 1.079  |
| 104164_at   | 332.8  | 291.2  | 444.3  | 459.8  | 339.4  | 401    | 451.4  | 390.6  | 0.786673233 | 382.025  | 395.6    | 13.575  | 0.965685035 | 0.7158  | 1.049  |
| 104165_at   | 887.6  | 1017.9 | 952.8  | 1058.2 | 1446.8 | 1160.7 | 1108.4 | 1130.6 | 0.052803216 | 979.125  | 1211.625 | 232.5   | 0.808108945 | 0.02839 | 1.233  |
| 104166_at   | 42.3   | 137    | 41     | 67.2   | 112.8  | 49.7   | 100.1  | 79.5   | 0.627386503 | 71.875   | 85.525   | 13.65   | 0.840397545 | 0.4725  | 1.292  |
| 104168_at   | 136.8  | 154.2  | 145    | 128.5  | 59.6   | 135.8  | 163.7  | 113.3  | 0.378203876 | 141.125  | 118.1    | 23.025  | 1.194961897 | 0.3219  | -1.272 |
| 104169_at   | 12.7   | 41.6   | 25.3   | 18.4   | 34.4   | 45.6   | 6      | 5.4    | 0.895438486 | 24.5     | 22.85    | 1.65    | 1.072210066 | 0.5474  | -1.483 |
| 104170_at   | 405.9  | 347.5  | 421.9  | 420.3  | 354.1  | 478.6  | 317    | 497.8  | 0.801356572 | 398.9    | 411.875  | 12.975  | 0.968497724 | 0.8938  | 1.017  |
| 104171_f_at | 112.2  | 119    | 89.9   | 61.4   | 106.8  | 64.3   | 76.5   | 45.6   | 0.267584375 | 95.625   | 73.3     | 22.325  | 1.304570259 | 0.2717  | -1.325 |
| 104172_at   | 162.5  | 113.8  | 120.7  | 135.8  | 83.9   | 122.8  | 105.1  | 120.1  | 0.123432989 | 133.2    | 107.975  | 25.225  | 1.233618893 | 0.1225  | -1.235 |
| 104173_at   | 177.9  | 159.4  | 131.7  | 111    | 100.4  | 250.1  | 201.4  | 118.9  | 0.583579093 | 145      | 167.7    | 22.7    | 0.864639237 | 0.7109  | 1.097  |
| 104174_at   | 52.5   | 72.9   | 58.5   | 51.1   | 75.6   | 45.2   | 53.6   | 89.2   | 0.556213687 | 58.75    | 65.9     | 7.15    | 0.891502276 | 0.6288  | 1.093  |
| 104175_at   | 33     | 23.9   | 85.7   | 84.7   | 27.6   | 56.5   | 61.7   | 52.7   | 0.710779591 | 56.825   | 49.625   | 7.2     | 1.145088161 | 0.9392  | -1.03  |
| 104176_at   | 144.5  | 127.7  | 194.8  | 176.2  | 183.8  | 180.5  | 193.6  | 238.1  | 0.107972117 | 160.8    | 199      | 38.2    | 0.808040201 | 0.1026  | 1.247  |
| 104177_at   | 36.6   | 102    | 72.3   | 56.5   | 117.6  | 123.6  | 52.8   | 89.6   | 0.22190487  | 66.85    | 95.9     | 29.05   | 0.697080292 | 0.243   | 1.457  |
| 104179_at   | 188.3  | 224    | 242.6  | 253.2  | 220.1  | 145.5  | 163.7  | 218.4  | 0.146565779 | 227.025  | 186.925  | 40.1    | 1.214524542 | 0.1479  | -1.226 |
| 104180_at   | 32     | 83.9   | 79.4   | 84.7   | 82.4   | 91.3   | 105.7  | 139.4  | 0.099905864 | 70       | 104.7    | 34.7    | 0.668576886 | 0.1362  | 1.575  |
| 104181_at   | 29.6   | 16.9   | 45.5   | 37.7   | 33.9   | 24.8   | 31.7   | 33.1   | 0.822906324 | 32.425   | 30.875   | 1.55    | 1.050202429 | 0.9743  | 1.008  |
| 104182_at   | 12.4   | 12.9   | 11.2   | 17     | 11     | 18.3   | 9.8    | 12.1   | 0.80999268  | 13.375   | 12.8     | 0.575   | 1.044921875 | 0.7292  | -1.061 |
| 104183_at   | 367.8  | 277.5  | 381.7  | 365.9  | 298.5  | 419.3  | 369    | 349.2  | 0.765608077 | 348.225  | 359      | 10.775  | 0.969986072 | 0.7727  | 1.031  |
| 104184_at   | 42.3   | 59     | 44.9   | 48.8   | 55.7   | 57.9   | 63.4   | 53.9   | 0.089326108 | 48.75    | 57.725   | 8.975   | 0.844521438 | 0.07232 | 1.192  |



|             |        |        |        |        |        |        |        |        |             |          |          |          |             |          |        |
|-------------|--------|--------|--------|--------|--------|--------|--------|--------|-------------|----------|----------|----------|-------------|----------|--------|
| 104185_at   | 106.3  | 79.8   | 117.4  | 111.8  | 137.9  | 155.2  | 29.9   | 110.5  | 0.883676419 | 103.825  | 108.375  | 4.55     | 0.958016148 | 0.78     | -1.121 |
| 104186_at   | 96.1   | 92.7   | 153.1  | 207.5  | 108.5  | 96.5   | 141.9  | 160.1  | 0.746596368 | 137.35   | 126.75   | 10.6     | 1.083629191 | 0.854    | -1.044 |
| 104187_at   | 285.8  | 222.4  | 289.2  | 405.5  | 294.6  | 244.1  | 260.1  | 318.6  | 0.634397346 | 300.725  | 279.35   | 21.375   | 1.076516914 | 0.6967   | -1.058 |
| 104188_at   | 214.3  | 377.7  | 332.6  | 553    | 357.4  | 265    | 448.8  | 545.3  | 0.720537768 | 369.4    | 404.125  | 34.725   | 0.914073616 | 0.673    | 1.117  |
| 104189_at   | 373.1  | 327.2  | 436.3  | 372    | 349.1  | 372.4  | 456.1  | 438.3  | 0.461721109 | 377.15   | 403.975  | 26.825   | 0.933597376 | 0.4655   | 1.07   |
| 104190_at   | 174.6  | 158    | 137    | 156.2  | 154.4  | 196.7  | 169.8  | 135.8  | 0.628960966 | 156.45   | 164.175  | 7.725    | 0.952946551 | 0.6607   | 1.044  |
| 104191_at   | 21.8   | 84.6   | 44.1   | 30.7   | 27     | 41.4   | 34.9   | 46.2   | 0.617071431 | 45.3     | 37.375   | 7.925    | 1.212040134 | 0.8023   | -1.085 |
| 104192_at   | 60.4   | 47.8   | 117.3  | 130.4  | 26.4   | 33.9   | 198.4  | 107.8  | 0.955563283 | 88.975   | 91.625   | 2.65     | 0.971077763 | 0.7109   | -1.232 |
| 104193_at   | 1052.4 | 1014.7 | 1104.1 | 1252.3 | 1088.9 | 960    | 1202.7 | 1134   | 0.901005254 | 1105.875 | 1096.4   | 9.475    | 1.008641919 | 0.8987   | 1.009  |
| 104194_at   | 365.8  | 673.9  | 456.3  | 489.7  | 561.5  | 376.8  | 581.2  | 459    | 0.982901137 | 496.425  | 494.625  | 1.8      | 1.003639121 | 0.9712   | 1.006  |
| 104195_at   | 643.1  | 733.6  | 399.5  | 395.7  | 744.5  | 742.9  | 476.4  | 601.9  | 0.397235619 | 542.975  | 641.425  | 98.45    | 0.846513622 | 0.3641   | 1.208  |
| 104196_at   | 957    | 919.4  | 849.7  | 884.3  | 841    | 942.2  | 916.7  | 961.2  | 0.730117444 | 902.6    | 915.275  | 12.675   | 0.986151703 | 0.7386   | 1.014  |
| 104197_at   | 74.9   | 185.2  | 317.1  | 228.5  | 219.7  | 122.1  | 232.7  | 248.2  | 0.944396213 | 201.425  | 205.675  | 4.25     | 0.979336332 | 0.7673   | 1.114  |
| 104198_at   | 117    | 27.8   | 60.1   | 95.5   | 57.5   | 101.5  | 49.4   | 67.6   | 0.799643014 | 75.1     | 69       | 6.1      | 1.088405797 | 0.9764   | 1.011  |
| 104199_at   | 227.7  | 209.6  | 244.7  | 205.1  | 220    | 299    | 228.8  | 249.6  | 0.230212828 | 221.775  | 249.35   | 27.575   | 0.889412472 | 0.2054   | 1.119  |
| 104200_at   | 153.7  | 136.8  | 201.2  | 200.4  | 165.5  | 165    | 143    | 209.3  | 0.917493577 | 173.025  | 170.7    | 2.325    | 1.013620387 | 0.9422   | 1.009  |
| 104201_at   | 396.7  | 318.3  | 314.2  | 384    | 258.1  | 262    | 225.2  | 216.5  | 0.007149641 | 353.3    | 240.45   | 112.85   | 1.469328343 | 0.002658 | -1.466 |
| 104202_at   | 146.1  | 176.9  | 223.6  | 267.2  | 259.6  | 133.6  | 242.3  | 261.4  | 0.626251714 | 203.45   | 224.225  | 20.775   | 0.90734753  | 0.6881   | 1.092  |
| 104205_at   | 61.9   | 70.8   | 62.7   | 97.9   | 55.6   | 57     | 24.6   | 49.2   | 0.05651631  | 73.325   | 46.6     | 26.725   | 1.573497854 | 0.07344  | -1.629 |
| 104206_at   | 94.8   | 74.6   | 51.4   | 62.2   | 52.3   | 64     | 78.2   | 45.1   | 0.395150971 | 70.75    | 59.9     | 10.85    | 1.181135225 | 0.3949   | -1.176 |
| 104207_at   | 24.2   | 60.7   | 38.5   | 44.3   | 58.3   | 15.5   | 33.2   | 52     | 0.865564766 | 41.925   | 39.75    | 2.175    | 1.054716981 | 0.7493   | -1.127 |
| 104208_at   | 300.3  | 269.3  | 296.5  | 349    | 269.8  | 351.5  | 331.1  | 317.7  | 0.587637283 | 303.775  | 317.525  | 13.75    | 0.956696323 | 0.5937   | 1.045  |
| 104209_at   | 565.4  | 646.6  | 598.2  | 596.4  | 516.7  | 501.1  | 482.4  | 590.4  | 0.038255172 | 601.65   | 522.65   | 79       | 1.151152779 | 0.03344  | -1.153 |
| 104210_at   | 131.8  | 65.9   | 90.2   | 109.3  | 118.4  | 36.1   | 78.5   | 78.2   | 0.364818581 | 99.3     | 77.8     | 21.5     | 1.276349614 | 0.3454   | -1.344 |
| 104211_at   | 179.4  | 86.5   | 118.6  | 124.6  | 84     | 159.2  | 132.2  | 111.8  | 0.834140279 | 127.275  | 121.8    | 5.475    | 1.044950739 | 0.8611   | 1.038  |
| 104212_at   | 798.5  | 628.4  | 911.9  | 918.8  | 1013.2 | 839.8  | 973.8  | 982.3  | 0.140447138 | 814.4    | 952.275  | 137.875  | 0.855215143 | 0.1434   | 1.18   |
| 104213_at   | 120.8  | 93.5   | 90.8   | 101.8  | 64.2   | 123    | 83.2   | 102.8  | 0.584883222 | 101.725  | 93.3     | 8.425    | 1.090300107 | 0.5064   | -1.115 |
| 104214_at   | 88.5   | 76.6   | 230.7  | 151.3  | 99.9   | 147.9  | 163.1  | 149.6  | 0.934003214 | 136.775  | 140.125  | 3.35     | 0.976092774 | 0.7168   | 1.111  |
| 104215_at   | 127.5  | 136.2  | 177    | 137    | 129.6  | 125.8  | 151.5  | 174.4  | 0.956328258 | 144.425  | 145.325  | 0.9      | 0.993806984 | 0.9582   | 1.006  |
| 104216_at   | 78     | 79.2   | 131.7  | 108.1  | 89.4   | 115.4  | 110.4  | 88     | 0.920272874 | 99.25    | 100.8    | 1.55     | 0.984623016 | 0.8303   | 1.033  |
| 104217_at   | 139.6  | 133.8  | 136    | 161.8  | 156.5  | 171.6  | 145.8  | 129.4  | 0.494924268 | 142.8    | 150.825  | 8.025    | 0.94679264  | 0.5038   | 1.054  |
| 104218_s_at | 151.2  | 163.1  | 259.9  | 284.7  | 117.8  | 166.6  | 270.7  | 285    | 0.931935307 | 214.725  | 210.025  | 4.7      | 1.022378288 | 0.8654   | -1.048 |
| 104219_f_at | 110.6  | 53     | 87.8   | 85.1   | 65.6   | 106.9  | 92.7   | 76.8   | 0.929700383 | 84.125   | 85.5     | 1.375    | 0.983918129 | 0.8679   | 1.033  |
| 104220_at   | 389.7  | 326.6  | 262.1  | 322.2  | 297    | 393.4  | 336.3  | 323.4  | 0.721799609 | 325.15   | 337.525  | 12.375   | 0.963336049 | 0.6905   | 1.043  |
| 104221_at   | 2658.4 | 2406   | 3914.5 | 3616.8 | 2034.9 | 1658.3 | 1688.2 | 1353.4 | 0.021267679 | 3148.925 | 1683.7   | 1465.225 | 1.870241136 | 0.005252 | -1.851 |
| 104222_f_at | 390.7  | 464.6  | 441.1  | 347.7  | 334.6  | 413.8  | 390.7  | 290    | 0.209690267 | 411.025  | 357.275  | 53.75    | 1.150444336 | 0.2133   | -1.154 |
| 104225_at   | 299.8  | 219.4  | 330.1  | 440.4  | 501.2  | 371.3  | 437    | 610.5  | 0.06146455  | 322.425  | 480      | 157.575  | 0.67171875  | 0.06014  | 1.51   |
| 104227_at   | 97.9   | 70.2   | 68.8   | 86     | 66.4   | 131.2  | 59.9   | 100.6  | 0.648710967 | 80.725   | 89.525   | 8.8      | 0.901703435 | 0.7639   | 1.065  |
| 104228_at   | 16     | 23.3   | 26     | 35.6   | 45.6   | 29.7   | 40.4   | 62.5   | 0.060551382 | 25.225   | 44.55    | 19.325   | 0.566217733 | 0.04411  | 1.774  |
| 104229_at   | 67.6   | 47     | 97.5   | 75.6   | 78.3   | 76.1   | 74.8   | 78.4   | 0.666855973 | 71.925   | 76.9     | 4.975    | 0.935305592 | 0.5337   | 1.105  |
| 104230_at   | 95.6   | 141.3  | 160.5  | 90.3   | 177    | 177.4  | 143.3  | 128.2  | 0.159179412 | 121.925  | 156.475  | 34.55    | 0.779197955 | 0.1495   | 1.31   |
| 104231_at   | 628.1  | 700.7  | 876.4  | 908.4  | 685.4  | 680.9  | 1110.5 | 1008.8 | 0.505804497 | 778.4    | 871.4    | 93       | 0.893275189 | 0.544    | 1.105  |
| 104232_at   | 51.4   | 38.9   | 30.7   | 65.5   | 36.9   | 68.9   | 52.9   | 41.8   | 0.747866237 | 46.625   | 50.125   | 3.5      | 0.930174564 | 0.7109   | 1.087  |
| 104233_at   | 9.5    | 8.9    | 11.8   | 19.3   | 20.4   | 15.9   | 9.8    | 6.5    | 0.850135267 | 12.375   | 13.15    | 0.775    | 0.941064639 | 0.9542   | 1.019  |
| 104234_at   | 285    | 262.6  | 328.6  | 264.8  | 293.7  | 350.7  | 364.2  | 297.3  | 0.134119392 | 285.25   | 326.475  | 41.225   | 0.873726932 | 0.1273   | 1.144  |
| 104235_at   | 559.9  | 622.8  | 687.7  | 844.2  | 682.1  | 621.6  | 685.6  | 797.4  | 0.810382661 | 678.65   | 696.675  | 18.025   | 0.974127104 | 0.7501   | 1.034  |
| 104237_at   | 840.2  | 1012.9 | 724.8  | 777    | 1048   | 1050.3 | 822.2  | 895.4  | 0.222820578 | 838.725  | 953.975  | 115.25   | 0.879189706 | 0.2131   | 1.14   |
| 104238_at   | 176.8  | 186.4  | 153.3  | 162    | 165.6  | 306.5  | 143.7  | 181.8  | 0.47885095  | 169.625  | 199.4    | 29.775   | 0.850677031 | 0.5067   | 1.128  |
| 104239_at   | 94.3   | 66.4   | 47.2   | 45.8   | 79.4   | 79.4   | 87.6   | 88.1   | 0.171429458 | 63.425   | 83.625   | 20.2     | 0.758445441 | 0.1123   | 1.377  |
| 104240_at   | 65.9   | 16     | 41.9   | 44.8   | 32.3   | 64.8   | 33.7   | 22.7   | 0.792494472 | 42.15    | 38.375   | 3.775    | 1.098371336 | 0.8898   | -1.055 |
| 104241_at   | 1009.1 | 1200.5 | 1198.9 | 1550.1 | 1087.7 | 1195.7 | 1338.1 | 1498.6 | 0.788736935 | 1239.65  | 1280.025 | 40.375   | 0.968457647 | 0.755    | 1.037  |
| 104242_f_at | 689.7  | 793.9  | 657.4  | 748.4  | 707.1  | 705.1  | 702.4  | 779.8  | 0.97343398  | 722.35   | 723.6    | 1.25     | 0.998272526 | 0.9469   | 1.003  |
| 104243_r_at | 136.3  | 181.1  | 124.4  | 109.6  | 111.1  | 83.4   | 153    | 89.1   | 0.241150284 | 137.85   | 109.15   | 28.7     | 1.262940907 | 0.2075   | -1.278 |
| 104244_at   | 360.1  | 287.6  | 332.9  | 300.7  | 333.6  | 315.5  | 271.8  | 243.3  | 0.309116527 | 320.325  | 291.05   | 29.275   | 1.100584092 | 0.3004   | -1.105 |
| 104245_at   | 326.3  | 302.3  | 355.4  | 393.8  | 328.8  | 374.4  | 333    | 349.5  | 0.933073852 | 344.45   | 346.425  | 1.975    | 0.99429891  | 0.8894   | 1.009  |
| 104246_at   | 629.8  | 737.7  | 677.2  | 867.8  | 579.5  | 587.9  | 693.1  | 867.5  | 0.606251952 | 728.125  | 682      | 46.125   | 1.067631965 | 0.5603   | -1.075 |



|             |        |        |        |        |        |        |        |        |             |          |          |         |             |           |        |
|-------------|--------|--------|--------|--------|--------|--------|--------|--------|-------------|----------|----------|---------|-------------|-----------|--------|
| 104247_at   | 663.5  | 425.8  | 399.4  | 430.8  | 419.4  | 533.2  | 493.6  | 433.3  | 0.888565463 | 479.875  | 469.875  | 10      | 1.021282256 | 0.9762    | 1.004  |
| 104248_at   | 2855.2 | 2023.9 | 2333.5 | 1786.5 | 1133.3 | 2648.3 | 2486.8 | 1890.7 | 0.632277621 | 2249.775 | 2039.775 | 210     | 1.102952532 | 0.562     | -1.143 |
| 104249_g_at | 2829.9 | 2380.4 | 3072.7 | 2307.3 | 1087.7 | 2541.5 | 3551.3 | 2268.7 | 0.625968949 | 2647.575 | 2362.3   | 285.275 | 1.120761546 | 0.4888    | -1.21  |
| 104250_at   | 418.3  | 465    | 671.1  | 693.2  | 472.7  | 484.1  | 567.2  | 651.1  | 0.833187237 | 561.9    | 543.775  | 18.125  | 1.033331801 | 0.9118    | -1.017 |
| 104252_at   | 1281.8 | 1226.5 | 1361.2 | 1510   | 1341.2 | 1129.9 | 1220.3 | 1591.2 | 0.844772555 | 1344.875 | 1320.65  | 24.225  | 1.01834324  | 0.7955    | -1.024 |
| 104253_at   | 97.1   | 217.9  | 231.3  | 233.7  | 141.8  | 142.9  | 157.7  | 200.7  | 0.390439256 | 195      | 160.775  | 34.225  | 1.212875136 | 0.5505    | -1.155 |
| 104254_at   | 275.9  | 253.7  | 277    | 365    | 293    | 217    | 311.1  | 377    | 0.877626569 | 292.9    | 299.525  | 6.625   | 0.977881646 | 0.9283    | 1.013  |
| 104255_at   | 59.9   | 77.8   | 72     | 79     | 101.8  | 106.9  | 88.7   | 99.4   | 0.003657055 | 72.175   | 99.2     | 27.025  | 0.727570565 | 0.005056  | 1.379  |
| 104256_at   | 87.6   | 89.7   | 75.5   | 102.1  | 51.8   | 94.9   | 46.1   | 45.4   | 0.085874079 | 88.725   | 59.55    | 29.175  | 1.489924433 | 0.05372   | -1.558 |
| 104257_g_at | 470.3  | 419.6  | 415.6  | 464.6  | 200.1  | 250.7  | 182.1  | 183.8  | 3.52584E-05 | 442.525  | 204.175  | 238.35  | 2.167380923 | 0.0000731 | -2.183 |
| 104258_at   | 451.5  | 648.7  | 409    | 513.6  | 536.1  | 610.7  | 573.8  | 534.8  | 0.356764574 | 505.7    | 563.85   | 58.15   | 0.896869735 | 0.2858    | 1.13   |
| 104259_at   | 892.8  | 730.9  | 1016.3 | 787.8  | 746.6  | 918.7  | 1079.6 | 736.5  | 0.900769232 | 856.95   | 870.35   | 13.4    | 0.984603895 | 0.9296    | 1.011  |
| 104260_at   | 189.1  | 233.3  | 253.4  | 306.4  | 265.4  | 249.2  | 315.5  | 370    | 0.187184147 | 245.55   | 300.025  | 54.475  | 0.818431797 | 0.1805    | 1.225  |
| 104261_at   | 157    | 184.8  | 228.9  | 296.4  | 260.4  | 208.7  | 221.5  | 255.5  | 0.580881006 | 216.775  | 236.525  | 19.75   | 0.916499313 | 0.4791    | 1.118  |
| 104262_at   | 83.4   | 54.8   | 69.3   | 85     | 64.1   | 113.8  | 62.3   | 59.3   | 0.91084756  | 73.125   | 74.875   | 1.75    | 0.976627713 | 0.9988    | 1      |
| 104263_at   | 551.7  | 621    | 578.1  | 612.8  | 710.8  | 677.8  | 703.7  | 692.8  | 0.003434919 | 590.9    | 696.275  | 105.375 | 0.848658935 | 0.001323  | 1.179  |
| 104264_at   | 696.8  | 667.3  | 824.2  | 935.3  | 463.7  | 567.8  | 525.7  | 702.2  | 0.036525892 | 780.9    | 564.85   | 216.05  | 1.382490927 | 0.03148   | -1.386 |
| 104265_at   | 200.4  | 215.6  | 259.4  | 217    | 233    | 235.5  | 217.1  | 354.9  | 0.341951669 | 223.1    | 260.125  | 37.025  | 0.857664584 | 0.3096    | 1.148  |
| 104266_at   | 199.4  | 189.8  | 246.2  | 208.4  | 181.9  | 288.9  | 206.6  | 228.3  | 0.579710517 | 210.95   | 226.425  | 15.475  | 0.931655073 | 0.6091    | 1.063  |
| 104267_at   | 542.1  | 458.9  | 694    | 834    | 585    | 636    | 767.4  | 692    | 0.699870526 | 632.25   | 670.1    | 37.85   | 0.943515893 | 0.6032    | 1.082  |
| 104268_at   | 115.3  | 115.2  | 116.2  | 123.7  | 93.3   | 180.6  | 143.6  | 95.3   | 0.649103245 | 117.6    | 128.2    | 10.6    | 0.917316693 | 0.7818    | 1.048  |
| 104269_at   | 28.9   | 29.9   | 25.5   | 26.5   | 27.9   | 40.5   | 29.3   | 24.9   | 0.459477878 | 27.7     | 30.65    | 2.95    | 0.903752039 | 0.4689    | 1.089  |
| 104270_at   | 140.7  | 186.9  | 157.3  | 198.1  | 123.4  | 136.2  | 129.4  | 169.3  | 0.114455194 | 170.75   | 139.575  | 31.175  | 1.223356618 | 0.1062    | -1.221 |
| 104271_at   | 109.2  | 54.7   | 75.3   | 95.1   | 59.3   | 127.9  | 99.6   | 94.5   | 0.547651963 | 83.575   | 95.325   | 11.75   | 0.876737477 | 0.5825    | 1.137  |
| 104272_s_at | 400.3  | 373.6  | 462.4  | 566.7  | 399    | 387.1  | 473.2  | 527    | 0.941103954 | 450.75   | 446.575  | 4.175   | 1.009348934 | 0.9713    | -1.004 |
| 104273_at   | 142.9  | 36.2   | 88.3   | 97.6   | 79     | 121    | 95.7   | 80.7   | 0.910815489 | 91.25    | 94.1     | 2.85    | 0.969713071 | 0.6957    | 1.134  |
| 104274_at   | 1543.1 | 1429.3 | 1316.4 | 1166.6 | 1424.1 | 1239.3 | 1989.7 | 1215.3 | 0.627725944 | 1363.85  | 1467.1   | 103.25  | 0.929623066 | 0.6693    | 1.059  |
| 104275_g_at | 835.9  | 675.3  | 757.7  | 703.4  | 520.9  | 597.8  | 533.8  | 733.4  | 0.054483963 | 743.075  | 596.475  | 146.6   | 1.245777275 | 0.04774   | -1.253 |
| 104276_at   | 1250.3 | 1028.8 | 1104.6 | 739.4  | 819.4  | 1139.2 | 965.6  | 805    | 0.488747073 | 1030.775 | 932.3    | 98.475  | 1.105625872 | 0.5289    | -1.097 |
| 104277_at   | 1332.8 | 1067   | 1481.1 | 1148.5 | 1216.5 | 1264.9 | 1231.8 | 1242.4 | 0.856026724 | 1257.35  | 1238.9   | 18.45   | 1.014892243 | 0.9302    | 1.007  |
| 104279_at   | 4150.5 | 4795.7 | 3220   | 3070.3 | 4292.4 | 3606.1 | 3297.9 | 3502.2 | 0.782910309 | 3809.125 | 3674.65  | 134.475 | 1.036595322 | 0.8478    | 1.024  |
| 104280_at   | 22.2   | 11.9   | 5.3    | 26.1   | 35.2   | 38.8   | 18.3   | 21.5   | 0.131923958 | 16.375   | 28.45    | 12.075  | 0.575571178 | 0.1487    | 1.957  |
| 104282_at   | 49     | 49.6   | 58.4   | 59.3   | 37.2   | 89.6   | 76.8   | 70.4   | 0.290021257 | 54.075   | 68.5     | 14.425  | 0.789416058 | 0.3795    | 1.209  |
| 104283_at   | 1005.9 | 1111.8 | 1105.4 | 1146.5 | 1128.1 | 1118.3 | 1330.8 | 1134.5 | 0.210534041 | 1092.4   | 1177.925 | 85.525  | 0.92739351  | 0.1929    | 1.077  |
| 104284_at   | 363    | 348.1  | 430.1  | 498.8  | 336.4  | 393.1  | 319.6  | 427.3  | 0.377920764 | 410      | 369.1    | 40.9    | 1.110810079 | 0.3779    | -1.107 |
| 104285_at   | 327.3  | 359.9  | 372.7  | 367.4  | 402    | 376.8  | 422.1  | 404.3  | 0.018306342 | 356.825  | 401.3    | 44.475  | 0.889172689 | 0.01992   | 1.125  |
| 104286_at   | 754.2  | 655.3  | 759.2  | 549    | 763.4  | 879.3  | 755.7  | 708.2  | 0.169451021 | 679.425  | 776.65   | 97.225  | 0.87481491  | 0.1683    | 1.149  |
| 104287_at   | 1638.1 | 1406.6 | 1729.7 | 1450.1 | 1274.9 | 1319.5 | 1160.2 | 1338.8 | 0.025672481 | 1556.125 | 1273.35  | 282.775 | 1.222071701 | 0.01488   | -1.22  |
| 104288_at   | 1239.9 | 1156.5 | 1538   | 1601.7 | 1333.7 | 1280.7 | 1577.8 | 1744.7 | 0.539185152 | 1384.025 | 1484.225 | 100.2   | 0.93249002  | 0.5317    | 1.074  |
| 104289_at   | 317.8  | 404.9  | 240.3  | 267.8  | 397.1  | 177.3  | 232.2  | 283.5  | 0.5752768   | 307.7    | 272.525  | 35.175  | 1.129070727 | 0.5044    | -1.156 |
| 104290_at   | 861.4  | 1238   | 1205   | 1169.4 | 1056.8 | 845.2  | 1110.6 | 810.6  | 0.207041801 | 1118.45  | 955.8    | 162.65  | 1.170171584 | 0.2247    | -1.169 |
| 104291_at   | 20.3   | 17.3   | 3.7    | 7.9    | 2.8    | 13.7   | 8.3    | 3.7    | 0.31355414  | 12.3     | 7.125    | 5.175   | 1.726315789 | 0.3543    | -1.71  |
| 104292_at   | 72.4   | 90.2   | 71.3   | 76.2   | 106.1  | 90.3   | 93.3   | 111.4  | 0.014755344 | 77.525   | 100.275  | 22.75   | 0.773123909 | 0.01271   | 1.295  |
| 104293_at   | 481.8  | 364.8  | 557.8  | 532.6  | 406.1  | 429.3  | 436.8  | 502.8  | 0.439283373 | 484.25   | 443.75   | 40.5    | 1.091267606 | 0.4898    | -1.081 |
| 104294_at   | 194.2  | 223.3  | 363.1  | 364.6  | 290.3  | 300    | 482.1  | 361.3  | 0.296872244 | 286.3    | 358.425  | 72.125  | 0.798772407 | 0.2717    | 1.275  |
| 104296_at   | 230.7  | 320    | 449.4  | 694.5  | 414.1  | 318.2  | 580.9  | 711.7  | 0.559188037 | 423.65   | 506.225  | 82.575  | 0.836880834 | 0.4945    | 1.24   |
| 104297_at   | 668.5  | 695.6  | 647.4  | 523.5  | 745.7  | 675.2  | 778    | 579    | 0.337973803 | 633.75   | 694.475  | 60.725  | 0.912559847 | 0.3572    | 1.095  |
| 104298_at   | 261.7  | 226.2  | 274.6  | 245.3  | 251.5  | 214    | 271.8  | 298.6  | 0.748220055 | 251.95   | 258.975  | 7.025   | 0.97287383  | 0.7909    | 1.023  |
| 104299_at   | 136.5  | 149.4  | 179.1  | 199.3  | 119.1  | 113.5  | 107.7  | 109.5  | 0.030600906 | 166.075  | 112.45   | 53.625  | 1.476878613 | 0.005171  | -1.462 |
| 104300_at   | 814.5  | 964.6  | 1003.9 | 738.2  | 922.2  | 591.4  | 951.5  | 900.9  | 0.724744573 | 880.3    | 841.5    | 38.8    | 1.04610814  | 0.6949    | -1.056 |
| 104301_at   | 1328.4 | 1311.5 | 838.2  | 601.9  | 1238.9 | 1212.2 | 719.4  | 843.3  | 0.94330842  | 1020     | 1003.45  | 16.55   | 1.016493099 | 0.9706    | 1.009  |
| 104302_f_at | 405.5  | 532.6  | 302.4  | 276.1  | 476.2  | 425.5  | 287.1  | 377.5  | 0.867191813 | 379.15   | 391.575  | 12.425  | 0.968269169 | 0.7981    | 1.051  |
| 104303_i_at | 663.7  | 552.2  | 619.3  | 765.6  | 672.7  | 523.9  | 1028.8 | 820.6  | 0.394035021 | 650.2    | 761.5    | 111.3   | 0.853841103 | 0.4303    | 1.144  |
| 104304_r_at | 312.5  | 456.2  | 342.3  | 436.4  | 375.5  | 340    | 446    | 456.6  | 0.708216523 | 386.85   | 404.525  | 17.675  | 0.95630678  | 0.6822    | 1.051  |
| 104305_at   | 1602.1 | 1566.6 | 1742.8 | 1645   | 1799.8 | 1624.1 | 1553.4 | 1411.3 | 0.661268255 | 1639.125 | 1597.15  | 41.975  | 1.026281188 | 0.6197    | -1.029 |
| 104306_at   | 563.3  | 425.4  | 647.7  | 595.4  | 584.2  | 590.7  | 659.9  | 692.6  | 0.235718169 | 557.95   | 631.85   | 73.9    | 0.883041861 | 0.2306    | 1.143  |



|             |        |        |        |        |        |        |        |        |             |          |          |         |             |           |        |
|-------------|--------|--------|--------|--------|--------|--------|--------|--------|-------------|----------|----------|---------|-------------|-----------|--------|
| 104308_at   | 151.9  | 87.8   | 69.3   | 105.7  | 89.5   | 142.7  | 119.2  | 124.1  | 0.498744314 | 103.675  | 118.875  | 15.2    | 0.872134595 | 0.4247    | 1.179  |
| 104310_at   | 660.6  | 633    | 738.2  | 730.6  | 670.9  | 783.2  | 647.4  | 632.2  | 0.873145146 | 690.6    | 683.425  | 7.175   | 1.010498592 | 0.8525    | 1.012  |
| 104311_at   | 848.9  | 876.9  | 868.1  | 1013.8 | 922.2  | 809.1  | 916.9  | 1098.3 | 0.644416662 | 901.925  | 936.625  | 34.7    | 0.962952089 | 0.663     | 1.035  |
| 104312_at   | 565.2  | 681.5  | 565.7  | 616.1  | 740.1  | 625.4  | 633.1  | 649.1  | 0.201654941 | 607.125  | 661.925  | 54.8    | 0.917211164 | 0.19      | 1.091  |
| 104313_at   | 2094.7 | 1796.2 | 1980.9 | 1641.4 | 2276   | 2426.9 | 1878.5 | 1898.1 | 0.209279688 | 1878.3   | 2119.875 | 241.575 | 0.886042809 | 0.2065    | 1.126  |
| 104314_r_at | 324.6  | 156.4  | 170.7  | 134.6  | 142.1  | 286.8  | 193.9  | 207.4  | 0.842608432 | 196.575  | 207.55   | 10.975  | 0.947121176 | 0.7369    | 1.089  |
| 104315_at   | 1281.7 | 1060.2 | 1394.9 | 1118.9 | 1057.9 | 1020.1 | 1221.2 | 1079   | 0.23589295  | 1213.925 | 1094.55  | 119.375 | 1.109063085 | 0.2244    | -1.105 |
| 104316_at   | 337.8  | 305.8  | 341.7  | 302.3  | 296.2  | 271.6  | 319.9  | 268.9  | 0.084737162 | 321.9    | 289.15   | 32.75   | 1.113263012 | 0.08242   | -1.114 |
| 104317_at   | 879.4  | 1237.8 | 1534.9 | 1383.8 | 1567.9 | 872.8  | 1416.7 | 1133   | 0.958252866 | 1258.975 | 1247.6   | 11.375  | 1.009117506 | 0.945     | 1.013  |
| 104318_at   | 209.5  | 233.1  | 269.7  | 223.8  | 207.2  | 240.3  | 261.1  | 331.5  | 0.420484733 | 234.025  | 260.025  | 26      | 0.900009614 | 0.4286    | 1.1    |
| 104320_at   | 596.3  | 577    | 621.7  | 590.6  | 577.7  | 707.5  | 611.4  | 635.5  | 0.281407714 | 596.4    | 633.025  | 36.625  | 0.942142885 | 0.256     | 1.059  |
| 104322_at   | 928.7  | 782.1  | 761.5  | 872.1  | 933.6  | 1016.7 | 1016.5 | 790.9  | 0.173164473 | 836.1    | 939.425  | 103.325 | 0.890012508 | 0.1785    | 1.121  |
| 104323_at   | 12.3   | 30.2   | 7.2    | 27.7   | 12.9   | 40.9   | 6.5    | 30.3   | 0.746783513 | 19.35    | 22.65    | 3.3     | 0.854304636 | 0.8807    | 1.088  |
| 104324_at   | 384.1  | 318    | 442.5  | 571    | 509.9  | 536.2  | 643    | 503.4  | 0.116843019 | 428.9    | 548.125  | 119.225 | 0.782485747 | 0.1003    | 1.301  |
| 104325_at   | 44.6   | 84.5   | 93.2   | 62.3   | 100    | 137.3  | 118.2  | 125.9  | 0.012825919 | 71.15    | 120.35   | 49.2    | 0.591192356 | 0.02074   | 1.747  |
| 104326_at   | 155.7  | 144    | 238.4  | 250.3  | 211    | 213.8  | 167.6  | 194.9  | 0.993013729 | 197.1    | 196.825  | 0.275   | 1.00139718  | 0.8811    | 1.024  |
| 104327_at   | 794.7  | 765.4  | 1078.1 | 855.2  | 1080.8 | 986.4  | 1071.3 | 1169.9 | 0.056228039 | 873.35   | 1077.1   | 203.75  | 0.810834649 | 0.04221   | 1.242  |
| 104328_at   | 40.5   | 27.7   | 8.5    | 49.7   | 17.9   | 71.5   | 6.8    | 47.7   | 0.808986123 | 31.6     | 35.975   | 4.375   | 0.878387769 | 0.9608    | -1.034 |
| 104329_at   | 7.4    | 21.8   | 9.5    | 6.6    | 13.3   | 12.9   | 22.7   | 4.4    | 0.711304461 | 11.325   | 13.325   | 2       | 0.849906191 | 0.7768    | 1.139  |
| 104330_g_at | 145    | 141.3  | 239.9  | 306.6  | 168.6  | 147.2  | 189.8  | 227.1  | 0.594968648 | 208.2    | 183.175  | 25.025  | 1.136617988 | 0.7004    | -1.089 |
| 104331_at   | 792.1  | 894.9  | 1254.5 | 1809.8 | 877.6  | 794.1  | 1459.5 | 1373.3 | 0.836652348 | 1187.825 | 1126.125 | 61.7    | 1.054789655 | 0.8882    | -1.036 |
| 104332_at   | 1019.9 | 1047.9 | 1022.7 | 811.8  | 1184.7 | 1260.2 | 903    | 930.8  | 0.412306657 | 975.575  | 1069.675 | 94.1    | 0.912029355 | 0.4334    | 1.09   |
| 104333_at   | 579.9  | 659.8  | 634.3  | 678.2  | 636.5  | 727    | 702.5  | 777.7  | 0.095893417 | 638.05   | 710.925  | 72.875  | 0.897492703 | 0.09394   | 1.113  |
| 104334_at   | 510.7  | 551.6  | 506.8  | 456    | 617    | 550.7  | 531.3  | 499.4  | 0.222268329 | 506.275  | 549.6    | 43.325  | 0.921169942 | 0.2184    | 1.085  |
| 104335_at   | 40.3   | 76     | 56.6   | 41.5   | 81     | 90.2   | 70.5   | 84.7   | 0.035118634 | 53.6     | 81.6     | 28      | 0.656862745 | 0.02922   | 1.569  |
| 104336_at   | 89.6   | 100.8  | 70.3   | 82.7   | 79.4   | 115.3  | 47.9   | 88.3   | 0.847549138 | 85.85    | 82.725   | 3.125   | 1.037775763 | 0.7147    | -1.079 |
| 104337_f_at | 416.6  | 426    | 520.6  | 626    | 944.9  | 757.9  | 607.2  | 734.4  | 0.024361796 | 497.3    | 761.1    | 263.8   | 0.6533964   | 0.01761   | 1.533  |
| 104338_r_at | 186.8  | 178.5  | 167.7  | 211.5  | 266.8  | 273    | 231.6  | 261.1  | 0.001505691 | 186.125  | 258.125  | 72      | 0.721065375 | 0.001707  | 1.389  |
| 104339_at   | 353.8  | 364.7  | 526.9  | 601.8  | 386.5  | 437.8  | 441.8  | 486.2  | 0.733274865 | 461.8    | 438.075  | 23.725  | 1.054157393 | 0.8401    | -1.03  |
| 104340_at   | 183.8  | 169.2  | 307.6  | 274.7  | 291.1  | 297.5  | 270    | 262.5  | 0.266431012 | 233.825  | 280.275  | 46.45   | 0.834269913 | 0.2074    | 1.236  |
| 104341_at   | 1087.4 | 878.6  | 1067.9 | 982.2  | 770.6  | 992    | 810.4  | 856.3  | 0.073581458 | 1004.025 | 857.325  | 146.7   | 1.171113638 | 0.07258   | -1.172 |
| 104342_i_at | 123    | 182.8  | 194.9  | 267.1  | 301.2  | 172.6  | 214.7  | 188.8  | 0.530779133 | 191.95   | 219.325  | 27.375  | 0.875185227 | 0.4912    | 1.158  |
| 104343_f_at | 4368.4 | 4198.7 | 3588.7 | 3865.9 | 5088.3 | 4314.5 | 4636.1 | 4481.4 | 0.040866717 | 4005.425 | 4630.075 | 624.65  | 0.865088578 | 0.04098   | 1.157  |
| 104344_at   | 40.5   | 40.5   | 21.9   | 13     | 77.3   | 65.3   | 80.8   | 75.2   | 0.003089024 | 28.975   | 74.65    | 45.675  | 0.388144675 | 0.009303  | 2.844  |
| 104345_at   | 461.3  | 478.9  | 434.2  | 411.1  | 550.8  | 442.4  | 442    | 531.6  | 0.227813664 | 446.375  | 491.7    | 45.325  | 0.907819809 | 0.2175    | 1.098  |
| 104346_at   | 171.2  | 169.8  | 219.7  | 209.6  | 193.8  | 150.6  | 184.9  | 189.4  | 0.459477206 | 192.575  | 179.675  | 12.9    | 1.071796299 | 0.4763    | -1.07  |
| 104348_at   | 923    | 1054.5 | 1001.2 | 792.2  | 1134.9 | 987.6  | 1183.7 | 805.3  | 0.441949939 | 942.725  | 1027.875 | 85.15   | 0.917159188 | 0.4762    | 1.085  |
| 104349_at   | 692.5  | 611.8  | 654.7  | 664.5  | 619.3  | 702.6  | 629.9  | 643.1  | 0.784796477 | 655.875  | 648.725  | 7.15    | 1.011021619 | 0.7795    | 1.011  |
| 104350_at   | 755.9  | 867.1  | 1033.4 | 1172.3 | 897.4  | 998.6  | 978.1  | 1035   | 0.845660238 | 957.175  | 977.275  | 20.1    | 0.979432606 | 0.7531    | 1.034  |
| 104351_at   | 173    | 170.7  | 187    | 160.9  | 243.4  | 269.2  | 244.1  | 255.6  | 6.70388E-05 | 172.9    | 253.075  | 80.175  | 0.683196681 | 0.0000648 | 1.464  |
| 104352_at   | 942.8  | 611.2  | 976    | 1021.9 | 1218.6 | 680.3  | 971.7  | 666    | 0.981981062 | 887.975  | 884.15   | 3.825   | 1.004326189 | 0.9301    | -1.017 |
| 104353_at   | 58.8   | 29.8   | 51.3   | 64.9   | 27.3   | 69.3   | 60.9   | 46.2   | 0.982448451 | 51.2     | 50.925   | 0.275   | 1.005400098 | 0.9355    | -1.023 |
| 104354_at   | 307.1  | 362.4  | 386.1  | 315.7  | 319.9  | 391    | 449.5  | 371.7  | 0.270416722 | 342.825  | 383.025  | 40.2    | 0.895046015 | 0.2709    | 1.114  |
| 104355_at   | 1.6    | 1.3    | 1.2    | 1.8    | 0.8    | 6.8    | 2.2    | 7.5    | 0.184757353 | 1.475    | 4.325    | 2.85    | 0.341040462 | 0.2192    | 2.099  |
| 104356_at   | 237.9  | 239.4  | 336.1  | 301.1  | 251.2  | 289.5  | 332    | 325.4  | 0.52041376  | 278.625  | 299.525  | 20.9    | 0.930222853 | 0.4971    | 1.081  |
| 104358_at   | 1099.8 | 985.3  | 862.5  | 823.1  | 1049.2 | 1270.7 | 942.2  | 847.8  | 0.475290851 | 942.675  | 1027.475 | 84.8    | 0.917467578 | 0.4821    | 1.085  |
| 104360_at   | 3842   | 3129.4 | 3697.3 | 3307   | 3424.6 | 3506.4 | 3851.3 | 3561.8 | 0.649741557 | 3493.925 | 3586.025 | 92.1    | 0.974316967 | 0.6181    | -1.029 |
| 104361_at   | 1014.6 | 964.9  | 696    | 512.2  | 840.9  | 896.7  | 539.3  | 630.5  | 0.648251433 | 796.925  | 726.85   | 70.075  | 1.096409163 | 0.7121    | -1.08  |
| 104362_at   | 464.9  | 491.9  | 457.6  | 628.7  | 512.4  | 464.3  | 530.4  | 717.5  | 0.534465559 | 510.775  | 556.15   | 45.375  | 0.918412299 | 0.5287    | 1.083  |
| 104363_at   | 284.3  | 242.9  | 220.4  | 231.7  | 248.4  | 267.9  | 156.3  | 219.8  | 0.475425848 | 244.825  | 223.1    | 21.725  | 1.097377857 | 0.4403    | -1.115 |
| 104364_at   | 588.9  | 482.9  | 483.1  | 440.4  | 500.4  | 528.6  | 420.7  | 409.2  | 0.460176026 | 498.825  | 464.725  | 34.1    | 1.073376728 | 0.4498    | -1.074 |
| 104365_at   | 872.3  | 766.4  | 970.6  | 960.7  | 720.3  | 711.6  | 1001.4 | 985.1  | 0.701351292 | 892.5    | 854.6    | 37.9    | 1.044348233 | 0.6492    | -1.054 |
| 104366_at   | 688.4  | 906.7  | 1244   | 1519.1 | 852.9  | 787.3  | 1010.5 | 1012.2 | 0.421729137 | 1089.55  | 915.725  | 173.825 | 1.189822272 | 0.4932    | -1.145 |
| 104367_at   | 1849.3 | 1628.2 | 2169.4 | 2155.2 | 1812.4 | 1734.2 | 1909.2 | 1900.1 | 0.465158007 | 1950.525 | 1838.975 | 111.55  | 1.060658791 | 0.4933    | -1.054 |
| 104368_at   | 88.5   | 75.4   | 137.6  | 139.1  | 142.3  | 183.3  | 87.7   | 123.9  | 0.387239269 | 110.15   | 134.3    | 24.15   | 0.820178704 | 0.3981    | 1.22   |
| 104369_at   | 219.2  | 156.4  | 200.2  | 172.9  | 172.1  | 274.4  | 183.3  | 210.4  | 0.433211919 | 187.175  | 210.05   | 22.875  | 0.891097358 | 0.4349    | 1.113  |



|             |        |        |        |        |        |        |        |        |             |          |          |          |             |          |        |
|-------------|--------|--------|--------|--------|--------|--------|--------|--------|-------------|----------|----------|----------|-------------|----------|--------|
| 104370_s_at | 37.3   | 123.7  | 22.9   | 96.8   | 27.6   | 39.4   | 85.3   | 57.4   | 0.54355064  | 70.175   | 52.425   | 17.75    | 1.338578922 | 0.7369   | -1.178 |
| 104371_at   | 419.7  | 350.3  | 379.8  | 339.4  | 370.1  | 370.9  | 360.3  | 384.8  | 0.969132912 | 372.3    | 371.525  | 0.775    | 1.002085997 | 0.9845   | 1.001  |
| 104372_at   | 315.4  | 297.5  | 317.5  | 314.1  | 277.6  | 309.2  | 235.7  | 295.9  | 0.141548876 | 311.125  | 279.6    | 31.525   | 1.112750358 | 0.1187   | -1.118 |
| 104373_at   | 369.5  | 266.6  | 405.2  | 431.8  | 249    | 289.1  | 359    | 413.7  | 0.460564045 | 368.275  | 327.7    | 40.575   | 1.123817516 | 0.4714   | -1.127 |
| 104374_at   | 160.4  | 97.8   | 95.4   | 214.7  | 116.4  | 157.9  | 207.6  | 224.9  | 0.394027841 | 142.075  | 176.7    | 34.625   | 0.804046406 | 0.3594   | 1.279  |
| 104375_at   | 2258.4 | 2358.7 | 2932   | 2392.3 | 1510.9 | 1383.9 | 1188.3 | 1280.8 | 0.001964122 | 2485.35  | 1340.975 | 1144.375 | 1.853390257 | 0.000215 | -1.851 |
| 104376_at   | 609.6  | 696.1  | 648.9  | 697.6  | 678.1  | 658.7  | 517.3  | 726.4  | 0.735175215 | 663.05   | 645.125  | 17.925   | 1.027785313 | 0.6897   | -1.034 |
| 104378_at   | 246.9  | 293.1  | 255.2  | 239.6  | 347.6  | 321.2  | 222.7  | 280.2  | 0.311734417 | 258.7    | 292.925  | 34.225   | 0.883161219 | 0.3308   | 1.12   |
| 104380_at   | 527.3  | 508.6  | 725.1  | 748.1  | 664    | 533.8  | 743.5  | 686.9  | 0.715167178 | 627.275  | 657.05   | 29.775   | 0.954683814 | 0.6759   | 1.056  |
| 104381_at   | 20.1   | 38.7   | 46.1   | 38.1   | 90.2   | 17.6   | 49.4   | 51.7   | 0.360012958 | 35.75    | 52.225   | 16.475   | 0.684538056 | 0.5089   | 1.312  |
| 104382_at   | 3.4    | 8.1    | 6.1    | 8.8    | 5.5    | 5.1    | 2.6    | 2.8    | 0.127733    | 6.6      | 4        | 2.6      | 1.65        | 0.1423   | -1.634 |
| 104383_at   | 55.5   | 92.6   | 83.5   | 86     | 52     | 95.2   | 71.7   | 95     | 0.946716906 | 79.4     | 78.475   | 0.925    | 1.011787193 | 0.904    | -1.023 |
| 104385_i_at | 196.4  | 114.6  | 121.1  | 122.9  | 94.8   | 200.1  | 160.7  | 258.5  | 0.362003169 | 138.75   | 178.525  | 39.775   | 0.777202073 | 0.4201   | 1.239  |
| 104386_f_at | 2860   | 3032.8 | 2939.2 | 3388.4 | 3522.8 | 2982.8 | 3388.9 | 3398.1 | 0.156460929 | 3055.1   | 3323.15  | 268.05   | 0.919338579 | 0.1569   | 1.088  |
| 104387_at   | 1.7    | 3.7    | 1.2    | 1.7    | 1.6    | 4.4    | 2      | 2.5    | 0.533134164 | 2.075    | 2.625    | 0.55     | 0.79047619  | 0.4632   | 1.293  |
| 104388_at   | 58     | 53.5   | 20.7   | 12.8   | 28.1   | 26.1   | 49.2   | 17.2   | 0.665515414 | 36.25    | 30.15    | 6.1      | 1.202321725 | 0.8735   | -1.074 |
| 104389_at   | 1724.5 | 1873.6 | 2562.6 | 3123.8 | 1339.2 | 1143.7 | 1444   | 1484.9 | 0.054587734 | 2321.125 | 1352.95  | 968.175  | 1.715602942 | 0.01381  | -1.675 |
| 104390_at   | 1954.5 | 1902.4 | 1780.1 | 1729.4 | 2225.5 | 2127.7 | 2249.3 | 1901.7 | 0.028853974 | 1841.6   | 2126.05  | 284.45   | 0.866207286 | 0.02439  | 1.153  |
| 104391_s_at | 429.4  | 373.3  | 406.9  | 402.7  | 308.7  | 409.1  | 366.3  | 391.1  | 0.229732922 | 403.075  | 368.8    | 34.275   | 1.092936551 | 0.2201   | -1.098 |
| 104392_at   | 176.5  | 93.7   | 185.7  | 194.2  | 116.1  | 165.5  | 137.8  | 133.5  | 0.391029437 | 162.525  | 138.225  | 24.3     | 1.175800326 | 0.5099   | -1.14  |
| 104393_at   | 248.7  | 279.6  | 246    | 227    | 317.6  | 278.8  | 191    | 231.7  | 0.888098357 | 250.325  | 254.775  | 4.45     | 0.982533608 | 0.9849   | -1.002 |
| 104394_at   | 475.8  | 409.7  | 460    | 479    | 466.2  | 524.7  | 463.3  | 474.2  | 0.273607618 | 456.125  | 482.1    | 25.975   | 0.946121137 | 0.2731   | 1.058  |
| 104395_at   | 1839.4 | 1507.9 | 1849.9 | 1723.5 | 1603   | 1529.7 | 1616.6 | 1493.6 | 0.119607354 | 1730.175 | 1560.725 | 169.45   | 1.108571337 | 0.09757  | -1.106 |
| 104396_at   | 230.5  | 143.8  | 224.2  | 197.9  | 128.4  | 214.3  | 188.3  | 163.6  | 0.381026011 | 199.1    | 173.65   | 25.45    | 1.146559171 | 0.4055   | -1.148 |
| 104398_at   | 66.9   | 89.8   | 105.5  | 123    | 133.3  | 110.2  | 131.9  | 88.2   | 0.266384963 | 96.3     | 115.9    | 19.6     | 0.830888697 | 0.2719   | 1.217  |
| 104399_at   | 1226.2 | 1392.3 | 1532.8 | 1479.3 | 1367.5 | 1271.8 | 1391.6 | 1185.8 | 0.258831467 | 1407.65  | 1304.175 | 103.475  | 1.079341346 | 0.2675   | -1.078 |
| 104400_at   | 167    | 147.1  | 247    | 201.1  | 91.3   | 186.2  | 276.9  | 164    | 0.814050406 | 190.55   | 179.6    | 10.95    | 1.06096882  | 0.6702   | -1.121 |
| 104401_at   | 57     | 45.5   | 49.9   | 33.7   | 9.1    | 41     | 49.3   | 45.1   | 0.366683051 | 46.525   | 36.125   | 10.4     | 1.287889273 | 0.3582   | -1.515 |
| 104402_at   | 223.7  | 256.6  | 230.7  | 271.7  | 182    | 202.3  | 271.7  | 257.5  | 0.51084865  | 245.675  | 228.375  | 17.3     | 1.0757526   | 0.4601   | -1.087 |
| 104403_at   | 712.8  | 662.6  | 776.8  | 875    | 633.4  | 694    | 838.1  | 796    | 0.810252709 | 756.8    | 740.375  | 16.425   | 1.022184704 | 0.8048   | 1.023  |
| 104404_at   | 130.5  | 146.5  | 216.5  | 286.1  | 142.2  | 135.6  | 193.6  | 194.7  | 0.506775476 | 194.9    | 166.525  | 28.375   | 1.170394836 | 0.5727   | -1.13  |
| 104405_at   | 179.4  | 116    | 179.4  | 207.3  | 192    | 199.8  | 187.7  | 249.1  | 0.181982278 | 170.525  | 207.15   | 36.625   | 0.823195752 | 0.1887   | 1.234  |
| 104406_at   | 904.5  | 724.3  | 697.9  | 484.2  | 463.5  | 529.5  | 469    | 458.3  | 0.078968099 | 702.725  | 480.075  | 222.65   | 1.463781701 | 0.03643  | -1.431 |
| 104407_at   | 279.3  | 301.3  | 337.9  | 718.9  | 347.4  | 228.3  | 603.5  | 761.2  | 0.651680747 | 409.35   | 485.1    | 75.75    | 0.84384663  | 0.6929   | 1.155  |
| 104408_s_at | 1111.5 | 922.6  | 1189.9 | 1354.9 | 578.6  | 665    | 800.3  | 826.6  | 0.009817771 | 1144.725 | 717.625  | 427.1    | 1.595157638 | 0.006782 | -1.596 |
| 104409_at   | 175.8  | 220.4  | 200.7  | 227.6  | 179.9  | 191.5  | 132.9  | 212.4  | 0.241122598 | 206.125  | 179.175  | 26.95    | 1.150411609 | 0.2448   | -1.162 |
| 104410_at   | 926.2  | 1009.7 | 1021.3 | 1111.4 | 958.2  | 961.6  | 921.4  | 923.4  | 0.136417377 | 1017.15  | 941.15   | 76       | 1.080752271 | 0.1003   | -1.079 |
| 104411_at   | 7.5    | 12.8   | 10.2   | 19.7   | 11     | 11.6   | 10.9   | 12.2   | 0.697481749 | 12.55    | 11.425   | 1.125    | 1.098468271 | 0.8667   | -1.036 |
| 104412_at   | 497.4  | 519    | 664.7  | 672.6  | 668.6  | 567    | 829    | 679.9  | 0.220514437 | 588.425  | 686.125  | 97.7     | 0.857606121 | 0.2161   | 1.167  |
| 104413_at   | 227.3  | 202    | 200.2  | 253.6  | 208.7  | 221.7  | 225.8  | 277    | 0.546760326 | 220.775  | 233.3    | 12.525   | 0.946313759 | 0.5397   | 1.056  |
| 104414_at   | 117.5  | 27.4   | 52     | 31.5   | 28.1   | 78.6   | 24.5   | 95     | 0.98465464  | 57.1     | 56.55    | 0.55     | 1.009725906 | 0.9887   | 1.007  |
| 104415_at   | 54.8   | 72.6   | 96.8   | 179.5  | 119.1  | 168.4  | 172.4  | 118.1  | 0.227984883 | 100.925  | 144.5    | 43.575   | 0.698442907 | 0.1572   | 1.558  |
| 104416_at   | 29.9   | 30     | 43.4   | 64.9   | 39.1   | 54.2   | 28     | 12.6   | 0.503665576 | 42.05    | 33.475   | 8.575    | 1.256161314 | 0.4343   | -1.356 |
| 104417_at   | 128.6  | 86.4   | 159.9  | 236.8  | 107.6  | 165.9  | 147.6  | 176.6  | 0.925246247 | 152.925  | 149.425  | 3.5      | 1.023423122 | 0.9198   | 1.025  |
| 104418_at   | 73.8   | 65.7   | 74     | 102.2  | 68     | 60.8   | 85.9   | 80.1   | 0.615561961 | 78.925   | 73.7     | 5.225    | 1.070895522 | 0.6261   | -1.065 |
| 104419_at   | 307    | 339.8  | 418.4  | 494.4  | 491.1  | 401.7  | 670.1  | 566.7  | 0.094754527 | 389.9    | 532.4    | 142.5    | 0.732344102 | 0.08682  | 1.365  |
| 104420_at   | 47.5   | 40.6   | 28.6   | 48.1   | 45.5   | 46.6   | 42.8   | 39.2   | 0.656263138 | 41.2     | 43.525   | 2.325    | 0.946582424 | 0.581    | 1.077  |
| 104421_at   | 57.5   | 34.6   | 31.7   | 37.4   | 36.8   | 53.8   | 38.4   | 33.7   | 0.961179655 | 40.3     | 40.675   | 0.375    | 0.990780578 | 0.9072   | 1.021  |
| 104422_at   | 339.6  | 287.5  | 246.4  | 320    | 229.3  | 413.4  | 240.7  | 240.6  | 0.73832465  | 298.375  | 281      | 17.375   | 1.06183274  | 0.608    | -1.088 |
| 104423_at   | 793.9  | 725.1  | 786.5  | 659.8  | 844.9  | 643.5  | 671.9  | 702.4  | 0.656733198 | 741.325  | 715.675  | 25.65    | 1.035840291 | 0.6246   | -1.039 |
| 104424_at   | 21.7   | 21.4   | 40.6   | 43.9   | 49.4   | 98.4   | 40     | 53.7   | 0.113788868 | 31.9     | 60.375   | 28.475   | 0.528364389 | 0.05999  | 1.885  |
| 104425_at   | 2.8    | 18.2   | 9.3    | 26.7   | 22.6   | 4.8    | 21.9   | 17.9   | 0.715367729 | 14.25    | 16.8     | 2.55     | 0.848214286 | 0.6415   | 1.354  |
| 104427_at   | 1005.2 | 996.3  | 1204.5 | 1348.5 | 1101.2 | 1039.7 | 1229.5 | 1198.5 | 0.971545067 | 1138.625 | 1142.225 | 3.6      | 0.996848257 | 0.9166   | 1.009  |
| 104428_s_at | 195.8  | 134.1  | 155.3  | 94.8   | 93.7   | 98.5   | 87.5   | 75.6   | 0.072525954 | 145      | 88.825   | 56.175   | 1.632423304 | 0.02963  | -1.586 |
| 104429_at   | 16.9   | 31.6   | 48.7   | 64.8   | 31.2   | 29.7   | 33.1   | 20.5   | 0.34080798  | 40.5     | 28.625   | 11.875   | 1.414847162 | 0.4584   | -1.281 |
| 104430_at   | 8.2    | 8.8    | 10.1   | 28.9   | 14     | 44.7   | 8.1    | 8      | 0.662068116 | 14       | 18.7     | 4.7      | 0.748663102 | 0.7532   | 1.179  |



|             |        |        |        |        |        |        |        |        |             |          |          |         |             |          |        |
|-------------|--------|--------|--------|--------|--------|--------|--------|--------|-------------|----------|----------|---------|-------------|----------|--------|
| 104431_at   | 147.1  | 107.8  | 77.5   | 90.2   | 102.6  | 188.2  | 110.2  | 129.8  | 0.315765015 | 105.65   | 132.7    | 27.05   | 0.796156745 | 0.2822   | 1.256  |
| 104432_at   | 1095.7 | 813.2  | 1088.8 | 888.5  | 389.1  | 662.3  | 445.2  | 609.3  | 0.0037391   | 971.55   | 526.475  | 445.075 | 1.845386771 | 0.005199 | -1.874 |
| 104433_at   | 396.2  | 309.6  | 394.3  | 406.8  | 256.3  | 382.7  | 361.2  | 350.4  | 0.31990898  | 376.725  | 337.65   | 39.075  | 1.115726344 | 0.3371   | -1.122 |
| 104434_at   | 685.8  | 663.5  | 739.6  | 856.2  | 746.2  | 716.9  | 683    | 765.4  | 0.865825296 | 736.275  | 727.875  | 8.4     | 1.011540443 | 0.9078   | -1.008 |
| 104435_at   | 1850   | 1601.1 | 1472.7 | 1241.6 | 1576.1 | 1796.5 | 1819   | 1475.6 | 0.446054514 | 1541.35  | 1666.8   | 125.45  | 0.924736021 | 0.419    | 1.088  |
| 104436_at   | 19.4   | 7.3    | 15.9   | 13.5   | 26.4   | 11.4   | 37.2   | 12.8   | 0.296899639 | 14.025   | 21.95    | 7.925   | 0.638952164 | 0.3183   | 1.471  |
| 104437_at   | 210.7  | 263.1  | 233.6  | 294.4  | 306.6  | 205.2  | 296.2  | 373.6  | 0.307150382 | 250.45   | 295.4    | 44.95   | 0.847833446 | 0.3373   | 1.163  |
| 104438_at   | 57.8   | 74.9   | 64.6   | 59.2   | 59.4   | 84.3   | 71.2   | 85.7   | 0.190788616 | 64.125   | 75.15    | 11.025  | 0.853293413 | 0.1891   | 1.166  |
| 104439_at   | 290.2  | 214.2  | 325.5  | 306.7  | 268.1  | 445.6  | 293    | 358.2  | 0.274869756 | 284.15   | 341.225  | 57.075  | 0.832734999 | 0.2752   | 1.192  |
| 104440_at   | 23.7   | 17.7   | 18.6   | 23.2   | 15.9   | 15.6   | 14.5   | 26.3   | 0.430328377 | 20.8     | 18.075   | 2.725   | 1.150760719 | 0.3375   | -1.176 |
| 104441_at   | 156.9  | 140.6  | 115.9  | 125.4  | 104.8  | 215    | 133.5  | 105.1  | 0.86801042  | 134.7    | 139.6    | 4.9     | 0.964899713 | 0.9845   | 1.004  |
| 104442_at   | 163    | 130    | 135.9  | 253.4  | 83.6   | 175.5  | 206.8  | 217.5  | 0.994953123 | 170.575  | 170.85   | 0.275   | 0.998390401 | 0.9287   | 1.025  |
| 104443_at   | 31.1   | 38.2   | 6.4    | 23.4   | 5.4    | 20.3   | 35.7   | 32.6   | 0.899729969 | 24.775   | 23.5     | 1.275   | 1.054255319 | 0.8919   | -1.088 |
| 104444_at   | 188.9  | 128.1  | 171.2  | 258.2  | 199.7  | 199.3  | 141.2  | 129.8  | 0.584758022 | 186.6    | 167.5    | 19.1    | 1.114029851 | 0.6202   | -1.101 |
| 104445_at   | 2293.1 | 2780.1 | 2911.6 | 3263.9 | 2830.8 | 2329.3 | 3578.1 | 3408.1 | 0.546138803 | 2812.175 | 3036.575 | 224.4   | 0.926100953 | 0.5841   | 1.073  |
| 104446_f_at | 196.5  | 201.6  | 209.8  | 226.6  | 240.5  | 198.2  | 241.2  | 254.8  | 0.137190931 | 208.625  | 233.675  | 25.05   | 0.892799829 | 0.1315   | 1.117  |
| 104447_r_at | 144.5  | 150.5  | 225.2  | 276.3  | 295.3  | 206.5  | 229.8  | 246.6  | 0.272807504 | 199.125  | 244.55   | 45.425  | 0.814250664 | 0.2279   | 1.264  |
| 104448_at   | 11.3   | 12.2   | 22.4   | 16.4   | 5.1    | 19.4   | 13.6   | 19.7   | 0.800995368 | 15.575   | 14.45    | 1.125   | 1.077854671 | 0.6629   | -1.176 |
| 104449_at   | 178.7  | 179.9  | 170    | 247.2  | 188    | 242.6  | 253    | 227.9  | 0.190926195 | 193.95   | 227.875  | 33.925  | 0.85112452  | 0.1741   | 1.181  |
| 104450_at   | 69     | 42     | 31.7   | 69.6   | 34.1   | 59.8   | 79.9   | 50.2   | 0.836312079 | 53.075   | 56       | 2.925   | 0.947767857 | 0.8228   | 1.063  |
| 104451_at   | 571    | 410.7  | 611.3  | 545.2  | 508.4  | 538.2  | 484.5  | 553.4  | 0.786341831 | 534.55   | 521.125  | 13.425  | 1.025761574 | 0.8701   | 1.016  |
| 104452_at   | 316.9  | 230.1  | 251.5  | 275.1  | 194.8  | 244.9  | 221.4  | 199.3  | 0.058812948 | 268.4    | 215.1    | 53.3    | 1.247791725 | 0.04447  | -1.244 |
| 104453_at   | 453    | 572.9  | 435    | 497.6  | 532.7  | 405.7  | 327.1  | 494.6  | 0.40991078  | 489.625  | 440.025  | 49.6    | 1.112720868 | 0.3804   | -1.126 |
| 104454_at   | 275.8  | 239.6  | 204    | 251.7  | 204.7  | 243.1  | 240    | 257    | 0.737350121 | 242.775  | 236.2    | 6.575   | 1.027836579 | 0.7619   | 1.026  |
| 104455_at   | 39.7   | 21.3   | 18.4   | 37.2   | 20.6   | 50.2   | 34.3   | 37.2   | 0.460492214 | 29.15    | 35.575   | 6.425   | 0.819395643 | 0.4718   | 1.228  |
| 104456_at   | 126.9  | 142.7  | 142.9  | 141.7  | 142.5  | 118.5  | 142.6  | 119.9  | 0.371485721 | 138.55   | 130.875  | 7.675   | 1.058643744 | 0.3526   | -1.061 |
| 104457_at   | 36.4   | 4.4    | 16.5   | 14.9   | 23.5   | 8.5    | 4.9    | 29.3   | 0.871537579 | 18.05    | 16.55    | 1.5     | 1.090634441 | 0.904    | -1.08  |
| 104458_at   | 328.6  | 330.8  | 521.2  | 518.6  | 298.4  | 269.6  | 366.1  | 402.8  | 0.212625286 | 424.8    | 334.225  | 90.575  | 1.271000075 | 0.2076   | -1.254 |
| 104460_at   | 14.4   | 15.3   | 13.3   | 52.3   | 17.3   | 14.9   | 35.2   | 66.7   | 0.549767899 | 23.825   | 33.525   | 9.7     | 0.710663684 | 0.4963   | 1.41   |
| 104461_at   | 604.4  | 374.5  | 513.2  | 479.3  | 605    | 513.6  | 424.7  | 446.7  | 0.943089081 | 492.85   | 497.5    | 4.65    | 0.990653266 | 0.9144   | 1.014  |
| 104462_at   | 387.8  | 415.8  | 498.6  | 398.7  | 332.6  | 519.2  | 305.3  | 424.1  | 0.609761733 | 425.225  | 395.3    | 29.925  | 1.075701998 | 0.5232   | -1.094 |
| 104463_at   | 813.3  | 755.9  | 487.9  | 799.4  | 756.9  | 746.4  | 572.4  | 539.9  | 0.552300341 | 714.125  | 653.9    | 60.225  | 1.092101239 | 0.6155   | -1.083 |
| 104464_s_at | 1484.7 | 2019.6 | 1821.5 | 1597.7 | 1982.4 | 1610.4 | 2148.9 | 1895.5 | 0.318110645 | 1730.875 | 1909.3   | 178.425 | 0.906549521 | 0.3176   | 1.105  |
| 104466_at   | 503.1  | 514.2  | 403.2  | 420.5  | 471    | 623    | 417    | 480.6  | 0.502984271 | 460.25   | 497.9    | 37.65   | 0.924382406 | 0.5098   | 1.076  |
| 104467_at   | 586.7  | 542.2  | 582    | 636.9  | 503.9  | 632.6  | 793.3  | 751.5  | 0.29512857  | 586.95   | 670.325  | 83.375  | 0.875620035 | 0.309    | 1.127  |
| 104468_at   | 202.9  | 144.1  | 214.5  | 213.1  | 96.2   | 214.1  | 183.8  | 170.4  | 0.400731521 | 193.65   | 166.125  | 27.525  | 1.165688488 | 0.3953   | -1.2   |
| 104469_at   | 1341.4 | 1567.1 | 1061.3 | 1050.2 | 1570.4 | 1392.5 | 1324.5 | 1237.1 | 0.419037405 | 1255     | 1381.125 | 126.125 | 0.908679519 | 0.3684   | 1.112  |
| 104470_at   | 407.9  | 377.2  | 354.2  | 313    | 302.8  | 442    | 348.2  | 295.8  | 0.702304065 | 363.075  | 347.2    | 15.875  | 1.045722926 | 0.6393   | -1.055 |
| 104471_at   | 2343.8 | 1859   | 2014   | 2160.3 | 2000.8 | 2505.4 | 2218.3 | 2161.8 | 0.421463011 | 2094.275 | 2221.575 | 127.3   | 0.942698311 | 0.4161   | 1.061  |
| 104473_at   | 491.1  | 375.3  | 432.6  | 445    | 286    | 488.3  | 396.6  | 391.8  | 0.387677183 | 436      | 390.675  | 45.325  | 1.11601715  | 0.358    | -1.131 |
| 104474_s_at | 27.6   | 39.1   | 8.2    | 40.6   | 81.3   | 72.7   | 72.9   | 39.8   | 0.019844861 | 28.875   | 66.675   | 37.8    | 0.433070866 | 0.05612  | 2.629  |
| 104475_at   | 169.5  | 136.1  | 246.4  | 261.4  | 130.4  | 111.9  | 168.9  | 195.4  | 0.204892366 | 203.35   | 151.65   | 51.7    | 1.340916584 | 0.208    | -1.325 |
| 104476_at   | 346.7  | 300    | 391.5  | 495.2  | 257.4  | 272.6  | 409    | 400.2  | 0.435411385 | 383.35   | 334.8    | 48.55   | 1.145011947 | 0.4194   | -1.151 |
| 104477_at   | 1063.7 | 1481   | 1193.4 | 1458.5 | 1606.7 | 1105.7 | 1869.3 | 1911.7 | 0.190019409 | 1299.15  | 1623.35  | 324.2   | 0.800289525 | 0.211    | 1.234  |
| 104479_at   | 14.1   | 7.4    | 12.8   | 16.6   | 8      | 15.7   | 13.9   | 12.2   | 0.917605107 | 12.725   | 12.45    | 0.275   | 1.022088353 | 0.9632   | -1.011 |
| 104480_at   | 228.4  | 189.3  | 197.6  | 209.1  | 306.3  | 284.4  | 343.7  | 247.3  | 0.01488725  | 206.1    | 295.425  | 89.325  | 0.697638995 | 0.004377 | 1.427  |
| 104481_at   | 108.4  | 110.3  | 115.2  | 154    | 83.4   | 43.4   | 150.7  | 134.9  | 0.519133475 | 121.975  | 103.1    | 18.875  | 1.183074685 | 0.4041   | -1.303 |
| 104482_at   | 835.1  | 543    | 675.4  | 748.3  | 517.9  | 752.7  | 757.4  | 641.7  | 0.707168366 | 700.45   | 667.425  | 33.025  | 1.049481215 | 0.7227   | -1.049 |
| 104483_at   | 53.3   | 36.1   | 165.9  | 107.4  | 53.3   | 70.2   | 158.2  | 95.8   | 0.924313829 | 90.675   | 94.375   | 3.7     | 0.960794702 | 0.772    | 1.134  |
| 104484_at   | 26.4   | 17     | 7      | 26.5   | 11.1   | 24.9   | 4.7    | 31.7   | 0.889531072 | 19.225   | 18.1     | 1.125   | 1.062154696 | 0.754    | -1.191 |
| 104485_at   | 125    | 76.7   | 108.9  | 90.3   | 86.8   | 143.7  | 76.6   | 106.5  | 0.867726962 | 100.225  | 103.4    | 3.175   | 0.969294004 | 0.9168   | 1.019  |
| 104486_at   | 49     | 70.2   | 52.5   | 67     | 166.7  | 129.3  | 78.9   | 130.2  | 0.029714886 | 59.675   | 126.275  | 66.6    | 0.472579687 | 0.00682  | 2.068  |
| 104487_at   | 60.4   | 49.7   | 38.1   | 27.7   | 35.4   | 59.3   | 30.2   | 26.7   | 0.573602976 | 43.975   | 37.9     | 6.075   | 1.160290237 | 0.5434   | -1.17  |
| 104488_at   | 460.7  | 631.7  | 474.9  | 528.8  | 439.8  | 364.4  | 455.4  | 459.9  | 0.091584089 | 524.025  | 429.875  | 94.15   | 1.219017156 | 0.07331  | -1.215 |
| 104489_at   | 14.6   | 8.7    | 31.4   | 43.3   | 6.1    | 15.3   | 15.7   | 14.7   | 0.24241976  | 24.5     | 12.95    | 11.55   | 1.891891892 | 0.2736   | -1.677 |
| 104491_at   | 173.1  | 213.5  | 263.8  | 236.8  | 272.5  | 221.2  | 250    | 262    | 0.241464403 | 221.8    | 251.425  | 29.625  | 0.882171622 | 0.2308   | 1.143  |



|             |        |        |        |        |        |        |        |        |             |          |          |         |             |         |        |
|-------------|--------|--------|--------|--------|--------|--------|--------|--------|-------------|----------|----------|---------|-------------|---------|--------|
| 104492_at   | 128    | 78.2   | 110.1  | 126.9  | 81.6   | 183.9  | 169.6  | 134    | 0.279324036 | 110.8    | 142.275  | 31.475  | 0.778773502 | 0.3424  | 1.25   |
| 104493_at   | 7.9    | 5.6    | 2.7    | 4.9    | 2.6    | 4.8    | 2.4    | 2.3    | 0.129580298 | 5.275    | 3.025    | 2.25    | 1.743801653 | 0.1089  | -1.7   |
| 104494_at   | 485.4  | 426.6  | 474.7  | 683.5  | 367.2  | 319.8  | 395.7  | 441.1  | 0.090523265 | 517.55   | 380.95   | 136.6   | 1.358577241 | 0.05157 | -1.346 |
| 104495_f_at | 15.7   | 17.7   | 19.8   | 13.6   | 17.7   | 73.1   | 28.8   | 69     | 0.117538053 | 16.7     | 47.15    | 30.45   | 0.354188759 | 0.04756 | 2.417  |
| 104496_i_at | 11.7   | 13     | 9.5    | 11.4   | 8      | 13.8   | 6.8    | 11.1   | 0.440979528 | 11.4     | 9.925    | 1.475   | 1.14861461  | 0.3694  | -1.182 |
| 104497_f_at | 15.4   | 13.7   | 7.4    | 10.3   | 11     | 13.6   | 22.1   | 13.4   | 0.31595473  | 11.7     | 15.025   | 3.325   | 0.778702163 | 0.2924  | 1.29   |
| 104498_at   | 30.4   | 14.2   | 1.5    | 23.8   | 11.7   | 47.6   | 32.9   | 2      | 0.635853816 | 17.475   | 23.55    | 6.075   | 0.742038217 | 0.8392  | 1.234  |
| 104499_at   | 7.8    | 54.7   | 37.4   | 44.9   | 11.4   | 25.9   | 37     | 64.1   | 0.918799789 | 36.2     | 34.6     | 1.6     | 1.046242775 | 0.9898  | 1.008  |
| 104500_at   | 127.8  | 126.4  | 191.6  | 160.1  | 139.5  | 171.9  | 155.7  | 183.5  | 0.56617405  | 151.475  | 162.65   | 11.175  | 0.93129419  | 0.5126  | 1.084  |
| 104501_at   | 192    | 184.3  | 200.6  | 226.6  | 224.7  | 206.2  | 229.6  | 208.7  | 0.190603157 | 200.875  | 217.3    | 16.425  | 0.924413254 | 0.1733  | 1.084  |
| 104502_f_at | 518.9  | 380    | 302.8  | 361.4  | 305.4  | 491    | 339.2  | 309.9  | 0.659147124 | 390.775  | 361.375  | 29.4    | 1.081355932 | 0.6368  | -1.082 |
| 104503_at   | 201    | 150.9  | 154.7  | 298.8  | 242    | 358.2  | 284.6  | 170.1  | 0.278752322 | 201.35   | 263.725  | 62.375  | 0.76348469  | 0.2652  | 1.315  |
| 104504_at   | 35.6   | 32.9   | 61.4   | 33.8   | 33.5   | 32.4   | 41.8   | 40.6   | 0.625804651 | 40.925   | 37.075   | 3.85    | 1.10384356  | 0.681   | -1.072 |
| 104505_at   | 1.8    | 4.6    | 2.1    | 5.7    | 4.6    | 5      | 3      | 2.2    | 0.901787254 | 3.55     | 3.7      | 0.15    | 0.959459459 | 0.7753  | 1.109  |
| 104506_at   | 175    | 136.7  | 85.5   | 180.7  | 118.7  | 193.8  | 169.8  | 171.1  | 0.514459476 | 144.475  | 163.35   | 18.875  | 0.884450566 | 0.4918  | 1.16   |
| 104507_g_at | 223.4  | 206.4  | 185.4  | 133.6  | 184.7  | 228.1  | 157.9  | 183    | 0.961607369 | 187.2    | 188.425  | 1.225   | 0.99349874  | 0.912   | 1.016  |
| 104508_at   | 137.4  | 108.6  | 114.1  | 89.5   | 94.2   | 128.8  | 126.2  | 104.1  | 0.945571586 | 112.4    | 113.325  | 0.925   | 0.991837635 | 0.9269  | 1.011  |
| 104509_at   | 41.7   | 7.8    | 28.3   | 25.3   | 31.2   | 39.4   | 37     | 38.2   | 0.224474363 | 25.775   | 36.45    | 10.675  | 0.707133059 | 0.2174  | 1.655  |
| 104510_at   | 87.3   | 88     | 74.7   | 190.8  | 55.1   | 84.9   | 168.9  | 191.6  | 0.737616076 | 110.2    | 125.125  | 14.925  | 0.880719281 | 0.8308  | 1.084  |
| 104512_at   | 687    | 806.8  | 585.1  | 633.8  | 376.2  | 713.7  | 762    | 746.1  | 0.793595919 | 678.175  | 649.5    | 28.675  | 1.044149346 | 0.6985  | -1.077 |
| 104513_at   | 1112.6 | 1411.6 | 1093.1 | 1197.7 | 1591.6 | 1260.1 | 829.2  | 1148.2 | 0.984701813 | 1203.75  | 1207.275 | 3.525   | 0.997080201 | 0.9039  | 1.019  |
| 104514_at   | 2010.1 | 1879   | 2254.6 | 2462.4 | 1726.8 | 1713.1 | 1848.1 | 1814   | 0.058407493 | 2151.525 | 1775.5   | 376.025 | 1.211785413 | 0.0247  | -1.206 |
| 104515_at   | 72.8   | 9.8    | 21.3   | 37.4   | 24.8   | 67.6   | 69.2   | 43.5   | 0.395156638 | 35.325   | 51.275   | 15.95   | 0.688932228 | 0.3076  | 1.725  |
| 104516_at   | 229    | 252    | 323    | 306.8  | 222    | 245.4  | 300.9  | 405.6  | 0.749400308 | 277.7    | 293.475  | 15.775  | 0.946247551 | 0.8179  | 1.038  |
| 104518_at   | 7.2    | 14     | 5.5    | 6.6    | 9.1    | 11.9   | 7.4    | 7.5    | 0.779624187 | 8.325    | 8.975    | 0.65    | 0.927576602 | 0.6126  | 1.133  |
| 104519_at   | 36.7   | 335.1  | 211    | 135.6  | 305    | 246.3  | 154.1  | 152.7  | 0.653637571 | 179.6    | 214.525  | 34.925  | 0.837198462 | 0.4561  | 1.497  |
| 104522_at   | 612.9  | 539.8  | 756.8  | 798.4  | 641.1  | 542.9  | 700.5  | 766.9  | 0.860821065 | 676.975  | 662.85   | 14.125  | 1.021309497 | 0.8913  | 1.017  |
| 104523_at   | 163.7  | 141    | 239.9  | 198.4  | 288.6  | 160.2  | 303.1  | 227.5  | 0.188926005 | 185.75   | 244.85   | 59.1    | 0.758627731 | 0.2021  | 1.305  |
| 104524_at   | 730.7  | 898.2  | 1423   | 1594.5 | 1043.8 | 926.5  | 928.6  | 1345.7 | 0.681679332 | 1161.6   | 1061.15  | 100.45  | 1.094661452 | 0.8076  | -1.054 |
| 104525_at   | 729.8  | 608.8  | 590.9  | 737.9  | 550.9  | 505.7  | 512    | 559.8  | 0.034175947 | 666.85   | 532.1    | 134.75  | 1.253241872 | 0.01337 | -1.248 |
| 104526_at   | 19.7   | 30.4   | 16.9   | 22.2   | 14.3   | 17.5   | 12     | 36.3   | 0.732527457 | 22.3     | 20.025   | 2.275   | 1.11360799  | 0.5312  | -1.199 |
| 104527_at   | 548.6  | 386.2  | 605.9  | 562.3  | 383.7  | 392.5  | 641.2  | 445.5  | 0.466341813 | 525.75   | 465.725  | 60.025  | 1.128885072 | 0.4369  | -1.138 |
| 104528_at   | 744    | 450    | 470.2  | 438.1  | 454.7  | 545.6  | 443.2  | 395.3  | 0.453483925 | 525.575  | 459.7    | 65.875  | 1.143299978 | 0.4463  | -1.122 |
| 104529_at   | 712.5  | 724.6  | 748.3  | 613.5  | 787    | 720.2  | 790.5  | 698.3  | 0.242599886 | 699.725  | 749      | 49.275  | 0.934212283 | 0.2464  | 1.072  |
| 104531_at   | 580    | 531.4  | 653.6  | 707.7  | 654    | 677.9  | 754.3  | 815.4  | 0.09278398  | 618.175  | 725.4    | 107.225 | 0.852185001 | 0.09219 | 1.176  |
| 104532_at   | 1245.2 | 1020   | 1070.8 | 1151.8 | 910.9  | 1305   | 981.2  | 1058.8 | 0.584503193 | 1121.95  | 1063.975 | 57.975  | 1.054489062 | 0.5284  | -1.061 |
| 104533_at   | 955.2  | 751.9  | 875.6  | 967.6  | 720.3  | 1157.8 | 837.7  | 915.2  | 0.855751711 | 887.575  | 907.75   | 20.175  | 0.977774718 | 0.9178  | 1.012  |
| 104534_at   | 280.6  | 404.4  | 358.7  | 277.8  | 390.1  | 333.9  | 386.4  | 338    | 0.405725678 | 330.375  | 362.1    | 31.725  | 0.912386081 | 0.3547  | 1.108  |
| 104535_at   | 218.5  | 284.1  | 420.6  | 339.5  | 375.4  | 398.5  | 383.6  | 401.3  | 0.182042732 | 315.675  | 389.7    | 74.025  | 0.810046189 | 0.1382  | 1.27   |
| 104536_at   | 1603.9 | 1655.4 | 1855.2 | 1880.1 | 1591.9 | 1745   | 1738   | 2107   | 0.733075934 | 1748.65  | 1795.475 | 46.825  | 0.97392055  | 0.7535  | 1.024  |
| 104537_at   | 230.3  | 232.3  | 223.1  | 216.7  | 291.8  | 240.5  | 203.6  | 261.8  | 0.290767322 | 225.6    | 249.425  | 23.825  | 0.904480305 | 0.2804  | 1.097  |
| 104538_at   | 916    | 1144.4 | 908.6  | 957.3  | 835.4  | 801.4  | 1003.1 | 1047.6 | 0.49535321  | 981.575  | 921.875  | 59.7    | 1.064759322 | 0.4763  | -1.067 |
| 104539_at   | 20.9   | 7.4    | 12.8   | 14.8   | 11.5   | 18.9   | 10.6   | 5.8    | 0.579544343 | 13.975   | 11.7     | 2.275   | 1.194444444 | 0.56    | -1.222 |
| 104541_at   | 48     | 63     | 21.7   | 78.6   | 65.4   | 64.3   | 64.5   | 61.7   | 0.425467468 | 52.825   | 63.975   | 11.15   | 0.825713169 | 0.3355  | 1.342  |
| 104544_at   | 525.3  | 663.5  | 562.5  | 739.2  | 953.1  | 548.3  | 509.5  | 648.7  | 0.722637392 | 622.625  | 664.9    | 42.275  | 0.93641901  | 0.793   | 1.045  |
| 104545_at   | 349.8  | 357.6  | 307    | 414.9  | 335    | 329.5  | 330.4  | 339.1  | 0.36214618  | 357.325  | 333.5    | 23.825  | 1.07143928  | 0.3469  | -1.065 |
| 104546_g_at | 188    | 161.1  | 145.6  | 237.3  | 121.7  | 165    | 216    | 202.7  | 0.827447664 | 183      | 176.35   | 6.65    | 1.037709101 | 0.8039  | -1.044 |
| 104547_at   | 162.4  | 207.8  | 225.3  | 270.7  | 269.2  | 226.1  | 248.9  | 236    | 0.304977882 | 216.55   | 245.05   | 28.5    | 0.883697205 | 0.2655  | 1.148  |
| 104548_at   | 121.9  | 110.6  | 98.8   | 120.4  | 109.3  | 183.1  | 80.4   | 94.8   | 0.875221598 | 112.925  | 116.9    | 3.975   | 0.965996578 | 0.9484  | 1.013  |
| 104549_at   | 1200.7 | 1152.5 | 1119.7 | 986.5  | 1471   | 1084.9 | 1081.5 | 1156.6 | 0.459389458 | 1114.85  | 1198.5   | 83.65   | 0.930204422 | 0.4582  | 1.069  |
| 104550_at   | 138.2  | 140.9  | 116.9  | 172.7  | 172.1  | 165.2  | 155.6  | 158.3  | 0.170642548 | 142.175  | 162.8    | 20.625  | 0.873310811 | 0.1329  | 1.155  |
| 104551_at   | 63.8   | 48.1   | 35.5   | 32.2   | 46.7   | 85.9   | 49.8   | 29.4   | 0.586981224 | 44.9     | 52.95    | 8.05    | 0.847969783 | 0.6489  | 1.137  |
| 104554_at   | 737.9  | 723.4  | 748.3  | 684.5  | 702.1  | 734.8  | 550.3  | 597.1  | 0.172020742 | 723.525  | 646.075  | 77.45   | 1.119877723 | 0.1414  | -1.127 |
| 104555_at   | 156    | 289.9  | 193.4  | 129.9  | 225.1  | 174.8  | 212    | 159.7  | 0.988220872 | 192.3    | 192.9    | 0.6     | 0.99688958  | 0.8416  | 1.041  |
| 104556_at   | 73.5   | 60.9   | 75.7   | 96.6   | 54.7   | 52.5   | 81.1   | 80.3   | 0.410959758 | 76.675   | 67.15    | 9.525   | 1.141846612 | 0.3914  | -1.15  |
| 104557_at   | 534.4  | 480.3  | 680.7  | 737    | 464.7  | 612.5  | 619.5  | 704.1  | 0.922911498 | 608.1    | 600.2    | 7.9     | 1.013162279 | 0.9476  | 1.009  |



|             |        |        |        |        |        |        |        |        |             |          |          |         |             |         |        |
|-------------|--------|--------|--------|--------|--------|--------|--------|--------|-------------|----------|----------|---------|-------------|---------|--------|
| 104558_at   | 273.5  | 290.5  | 544.4  | 673.3  | 289.6  | 347.1  | 477.5  | 529.5  | 0.772563465 | 445.425  | 410.925  | 34.5    | 1.083956926 | 0.9018  | -1.035 |
| 104559_at   | 2669.1 | 2842.3 | 2183.2 | 2164.9 | 2303.7 | 2531.7 | 1757.8 | 2200   | 0.302389368 | 2464.875 | 2198.3   | 266.575 | 1.121264159 | 0.3077  | -1.123 |
| 104560_at   | 833.4  | 558.2  | 551.7  | 614.5  | 642.2  | 609.5  | 520.7  | 582.8  | 0.516095809 | 639.45   | 588.8    | 50.65   | 1.086022418 | 0.529   | -1.073 |
| 104561_at   | 409.4  | 380.4  | 366.5  | 506.3  | 346.6  | 372    | 314.2  | 332.7  | 0.094948714 | 415.65   | 341.375  | 74.275  | 1.217575979 | 0.05556 | -1.21  |
| 104562_at   | 275.4  | 226.8  | 228.9  | 211.5  | 254.2  | 277.9  | 187.8  | 236.5  | 0.888814214 | 235.65   | 239.1    | 3.45    | 0.985570891 | 0.9307  | 1.009  |
| 104564_at   | 2.9    | 5.8    | 6.8    | 9.5    | 14     | 4.5    | 3.1    | 25.9   | 0.368855845 | 6.25     | 11.875   | 5.625   | 0.526315789 | 0.5113  | 1.47   |
| 104565_at   | 815.5  | 877.4  | 769.1  | 670    | 824.7  | 763.3  | 712.7  | 644.9  | 0.452988484 | 783      | 736.4    | 46.6    | 1.063280826 | 0.4635  | -1.062 |
| 104566_at   | 89.3   | 83.1   | 65.4   | 87.4   | 76.1   | 83.7   | 71.8   | 53.5   | 0.279968762 | 81.3     | 71.275   | 10.025  | 1.140652403 | 0.2967  | -1.147 |
| 104567_at   | 307.4  | 315.5  | 317.2  | 221.4  | 390.9  | 243.2  | 264.8  | 283.3  | 0.902074414 | 290.375  | 295.55   | 5.175   | 0.982490272 | 0.9355  | 1.011  |
| 104568_at   | 275.6  | 164.8  | 174.9  | 212    | 207.4  | 194.9  | 190.6  | 235.2  | 0.994451268 | 206.825  | 207.025  | 0.2     | 0.999033933 | 0.8881  | 1.019  |
| 104569_at   | 365.9  | 330.5  | 379.4  | 598.3  | 439.5  | 365.6  | 480.3  | 556.5  | 0.58810959  | 418.525  | 460.475  | 41.95   | 0.90889842  | 0.5062  | 1.118  |
| 104571_at   | 69.2   | 30     | 24.8   | 33.1   | 35.2   | 55.1   | 40.5   | 45.4   | 0.68571866  | 39.275   | 44.05    | 4.775   | 0.891600454 | 0.4761  | 1.204  |
| 104572_at   | 602.6  | 639.5  | 597.8  | 698.1  | 752.1  | 481.9  | 615.5  | 647.5  | 0.873300045 | 634.5    | 624.25   | 10.25   | 1.016419704 | 0.7959  | 1.027  |
| 104573_at   | 1263.5 | 2110.5 | 1271   | 1218.3 | 1928.9 | 1252.5 | 1158.3 | 1224.6 | 0.799251695 | 1465.825 | 1391.075 | 74.75   | 1.05373542  | 0.8001  | -1.048 |
| 104574_at   | 724.6  | 516.7  | 758.9  | 888.7  | 597.7  | 789.3  | 780.5  | 749.9  | 0.939483868 | 722.225  | 729.35   | 7.125   | 0.990231028 | 0.8707  | 1.023  |
| 104576_at   | 1127   | 1161.3 | 1645.8 | 2003.9 | 1134.3 | 1031.1 | 1361.5 | 1507.2 | 0.386822546 | 1484.5   | 1258.525 | 225.975 | 1.179555432 | 0.405   | -1.158 |
| 104577_at   | 277.6  | 279    | 309.2  | 259.6  | 300    | 307.6  | 295.6  | 278.5  | 0.294073313 | 281.35   | 295.425  | 14.075  | 0.952356774 | 0.2771  | 1.051  |
| 104578_f_at | 975.9  | 1086.9 | 1361   | 1618.2 | 999.9  | 835.6  | 1173.3 | 1390.7 | 0.424147209 | 1260.5   | 1099.875 | 160.625 | 1.146039323 | 0.4249  | -1.144 |
| 104579_r_at | 184.5  | 250.8  | 412.4  | 592.7  | 319.1  | 184.8  | 293.4  | 426.3  | 0.625310249 | 360.1    | 305.9    | 54.2    | 1.177182086 | 0.7433  | -1.113 |
| 104580_at   | 584.1  | 579.2  | 639.2  | 607.9  | 621.1  | 579.6  | 598.3  | 662.7  | 0.59149431  | 602.6    | 615.425  | 12.825  | 0.979160743 | 0.5951  | 1.021  |
| 104581_at   | 36.2   | 19.2   | 23.7   | 34.7   | 25.5   | 61.3   | 32.7   | 39.8   | 0.256172449 | 28.45    | 39.825   | 11.375  | 0.714375392 | 0.234   | 1.374  |
| 104582_g_at | 507.8  | 390.2  | 455.2  | 409.4  | 397.6  | 440    | 518.4  | 416.4  | 0.949778868 | 440.65   | 443.1    | 2.45    | 0.994470774 | 0.9475  | 1.006  |
| 104583_at   | 557.3  | 610    | 731.8  | 576.1  | 660.5  | 590    | 656.1  | 606.9  | 0.834276073 | 618.8    | 628.375  | 9.575   | 0.984762284 | 0.7765  | 1.02   |
| 104584_f_at | 10.5   | 11.2   | 4.6    | 11.4   | 37.1   | 14.8   | 7.4    | 8.5    | 0.359917571 | 9.425    | 16.95    | 7.525   | 0.556047198 | 0.3505  | 1.537  |
| 104585_at   | 252    | 288.8  | 247.6  | 293.9  | 216.3  | 336.9  | 288.9  | 284.1  | 0.709503788 | 270.575  | 281.55   | 10.975  | 0.961019357 | 0.7765  | 1.031  |
| 104586_at   | 571.5  | 502.9  | 717.8  | 722.5  | 688.6  | 641    | 731.2  | 773.9  | 0.256555281 | 628.675  | 708.675  | 80      | 0.887113275 | 0.2352  | 1.138  |
| 104587_at   | 624.1  | 647.3  | 690.4  | 745.1  | 702.8  | 666.6  | 836.3  | 949    | 0.185087066 | 676.725  | 788.675  | 111.95  | 0.858053064 | 0.1569  | 1.157  |
| 104588_at   | 102    | 76     | 16.8   | 17.8   | 15     | 25     | 15.7   | 18.9   | 0.204740759 | 53.15    | 18.65    | 34.5    | 2.849865952 | 0.1711  | -2.133 |
| 104589_at   | 716.2  | 866.6  | 1035.8 | 1168.5 | 1125.3 | 959    | 954.6  | 1111.9 | 0.448730615 | 946.775  | 1037.7   | 90.925  | 0.912378337 | 0.3984  | 1.111  |
| 104590_at   | 555.3  | 570.9  | 621.6  | 710    | 255.9  | 508.8  | 706.6  | 517.5  | 0.30370356  | 614.45   | 497.2    | 117.25  | 1.235820595 | 0.2692  | -1.309 |
| 104591_g_at | 193.9  | 202.5  | 266.6  | 238.6  | 100.2  | 116.9  | 291.7  | 245.4  | 0.505925272 | 225.4    | 188.55   | 36.85   | 1.195438876 | 0.3603  | -1.314 |
| 104592_i_at | 330.7  | 422.8  | 338.4  | 327.7  | 201.5  | 259.6  | 415.1  | 313.1  | 0.314564729 | 354.9    | 297.325  | 57.575  | 1.19364332  | 0.2559  | -1.229 |
| 104593_at   | 335.8  | 346.2  | 307.8  | 242.3  | 283.9  | 322.1  | 269.6  | 258.4  | 0.409101675 | 308.025  | 283.5    | 24.525  | 1.086507937 | 0.4435  | -1.08  |
| 104594_at   | 82.5   | 71.7   | 41.8   | 78.2   | 37.3   | 106.9  | 85.5   | 50.9   | 0.934104702 | 68.55    | 70.15    | 1.6     | 0.977191732 | 0.9275  | -1.028 |
| 104595_at   | 945.5  | 972.5  | 991.1  | 1020   | 1101.2 | 1048.8 | 1030.5 | 941.6  | 0.255011036 | 982.275  | 1030.525 | 48.25   | 0.953179205 | 0.2463  | 1.048  |
| 104597_at   | 142.5  | 209.5  | 120.5  | 121.6  | 151.1  | 234.6  | 193.7  | 191.4  | 0.155071391 | 148.525  | 192.7    | 44.175  | 0.770757654 | 0.1316  | 1.317  |
| 104598_at   | 300.1  | 339.5  | 560.5  | 806.4  | 371    | 369.1  | 578.5  | 469.3  | 0.688359689 | 501.625  | 446.975  | 54.65   | 1.122266346 | 0.8396  | -1.055 |
| 104600_at   | 205.3  | 244.5  | 220.6  | 320.9  | 211.3  | 185    | 275.6  | 265.9  | 0.704893216 | 247.825  | 234.45   | 13.375  | 1.057048411 | 0.7066  | -1.055 |
| 104601_at   | 699.8  | 1137.9 | 1179.9 | 1197   | 765.7  | 618.7  | 1007.4 | 956.6  | 0.198839013 | 1053.65  | 837.1    | 216.55  | 1.258690718 | 0.2353  | -1.253 |
| 104602_at   | 134.3  | 153.8  | 159.6  | 180.3  | 146.4  | 131.2  | 173.1  | 187.2  | 0.881144482 | 157      | 159.475  | 2.475   | 0.984480326 | 0.9135  | 1.011  |
| 104603_at   | 450.9  | 469    | 337.1  | 285    | 522    | 415.3  | 317.1  | 398.2  | 0.667498304 | 385.5    | 413.15   | 27.65   | 0.933075154 | 0.6516  | 1.077  |
| 104604_at   | 128.4  | 196.6  | 147.7  | 169.3  | 262.2  | 194.4  | 165.6  | 190.2  | 0.149420238 | 160.5    | 203.1    | 42.6    | 0.790251108 | 0.1298  | 1.263  |
| 104605_at   | 820.8  | 891.3  | 1053.3 | 1098.7 | 777.7  | 655.5  | 733.5  | 793.7  | 0.032922205 | 966.025  | 740.1    | 225.925 | 1.305262802 | 0.01793 | -1.3   |
| 104606_at   | 229.8  | 232    | 253.4  | 248.8  | 249.8  | 235    | 261.2  | 226.6  | 0.832571339 | 241      | 243.15   | 2.15    | 0.991157722 | 0.8426  | 1.008  |
| 104607_at   | 371.2  | 424.9  | 318.9  | 336.4  | 394.5  | 406.2  | 366.1  | 379.5  | 0.397754539 | 362.85   | 386.575  | 23.725  | 0.938627692 | 0.3458  | 1.071  |
| 104608_at   | 89     | 100    | 72.4   | 93.4   | 87.8   | 144    | 78.3   | 83.3   | 0.589570527 | 88.7     | 98.35    | 9.65    | 0.901881037 | 0.6322  | 1.082  |
| 104609_at   | 361    | 282.3  | 380.3  | 468.9  | 273.3  | 366.3  | 489.7  | 388.1  | 0.919017438 | 373.125  | 379.35   | 6.225   | 0.983590352 | 0.9446  | 1.012  |
| 104610_at   | 118.1  | 132.6  | 198.4  | 216.2  | 115.7  | 106.3  | 143.5  | 167.9  | 0.291883194 | 166.325  | 133.35   | 32.975  | 1.24728159  | 0.3021  | -1.227 |
| 104611_at   | 256.4  | 256.1  | 349.4  | 359.2  | 221.1  | 323.2  | 332.1  | 315.5  | 0.855487743 | 305.275  | 297.975  | 7.3     | 1.0244987   | 0.8631  | -1.024 |
| 104612_g_at | 249.9  | 229.4  | 377    | 398.6  | 234    | 245.8  | 361.9  | 339.8  | 0.746528794 | 313.725  | 295.375  | 18.35   | 1.062124418 | 0.7916  | -1.051 |
| 104614_at   | 1786.3 | 1837.4 | 1823.3 | 1903.7 | 1962   | 1939   | 1790   | 1876.4 | 0.287351973 | 1837.675 | 1891.85  | 54.175  | 0.971364009 | 0.2848  | 1.029  |
| 104615_at   | 20.4   | 19.8   | 8.3    | 14.1   | 10.2   | 17.6   | 10.6   | 14.9   | 0.517537267 | 15.65    | 13.325   | 2.325   | 1.174484053 | 0.6275  | -1.135 |
| 104616_g_at | 397.1  | 375.4  | 416.1  | 446.1  | 463.4  | 379.1  | 425.9  | 394.3  | 0.780215569 | 408.675  | 415.675  | 7       | 0.983159921 | 0.7895  | 1.016  |
| 104617_at   | 63.1   | 49.8   | 16.7   | 28.9   | 32.3   | 60.3   | 38     | 14.4   | 0.81826051  | 39.625   | 36.25    | 3.375   | 1.093103448 | 0.8416  | -1.092 |
| 104618_at   | 751    | 1052.8 | 1080.5 | 1023.2 | 1270.3 | 1061.8 | 1199.9 | 1076.2 | 0.110762412 | 976.875  | 1152.05  | 175.175 | 0.847944968 | 0.1207  | 1.188  |
| 104619_at   | 227.7  | 194.9  | 231.1  | 215.6  | 205.1  | 192.3  | 151.5  | 216    | 0.172491    | 217.325  | 191.225  | 26.1    | 1.13648843  | 0.1739  | -1.144 |



|             |        |        |        |        |        |        |        |        |             |          |          |         |             |          |        |
|-------------|--------|--------|--------|--------|--------|--------|--------|--------|-------------|----------|----------|---------|-------------|----------|--------|
| 104620_at   | 352.6  | 349.1  | 453.7  | 417.1  | 404.5  | 356.9  | 469.3  | 423.7  | 0.575283514 | 393.125  | 413.6    | 20.475  | 0.950495648 | 0.5654   | 1.054  |
| 104621_at   | 1024.5 | 1117.5 | 1307.1 | 1489   | 1189   | 896.4  | 1350   | 1349.1 | 0.804667124 | 1234.525 | 1196.125 | 38.4    | 1.032103668 | 0.7954   | -1.035 |
| 104622_at   | 216.5  | 199.3  | 189.7  | 161.1  | 186.6  | 199    | 138.8  | 171.8  | 0.351769409 | 191.65   | 174.05   | 17.6    | 1.101120368 | 0.3572   | -1.105 |
| 104623_at   | 291.5  | 261.4  | 328.7  | 330.8  | 249.1  | 250.4  | 307    | 354.9  | 0.691119815 | 303.1    | 290.35   | 12.75   | 1.043912519 | 0.6458   | -1.051 |
| 104624_at   | 1176.7 | 1031.2 | 1313.5 | 1559.1 | 942.3  | 1067.1 | 1126.3 | 1177.3 | 0.191266154 | 1270.125 | 1078.25  | 191.875 | 1.177950383 | 0.1703   | -1.168 |
| 104625_at   | 410.5  | 281.1  | 395.3  | 349.3  | 345.1  | 454.3  | 373.4  | 308.1  | 0.801549184 | 359.05   | 370.225  | 11.175  | 0.969815653 | 0.8021   | 1.031  |
| 104626_at   | 280.9  | 258.2  | 218.8  | 237.8  | 201.6  | 193.5  | 212.9  | 221.4  | 0.044630091 | 248.925  | 207.35   | 41.575  | 1.20050639  | 0.02636  | -1.197 |
| 104627_at   | 118.8  | 125.5  | 194.8  | 231.9  | 200.6  | 141.7  | 163.8  | 137.7  | 0.835804992 | 167.75   | 160.95   | 6.8     | 1.042249146 | 0.9503   | -1.012 |
| 104628_at   | 700.9  | 615.9  | 534.6  | 667.7  | 500.9  | 603.4  | 607.2  | 557.2  | 0.21014709  | 629.775  | 567.175  | 62.6    | 1.110371578 | 0.2168   | -1.108 |
| 104629_at   | 941.9  | 874.8  | 944    | 650.6  | 878.7  | 970.9  | 689.9  | 694.2  | 0.667505149 | 852.825  | 808.425  | 44.4    | 1.054921607 | 0.6792   | -1.055 |
| 104630_at   | 24.3   | 21.2   | 22.4   | 29.1   | 23.4   | 21.5   | 19.3   | 16.7   | 0.126741068 | 24.25    | 20.225   | 4.025   | 1.199011125 | 0.1214   | -1.198 |
| 104631_g_at | 18.3   | 34.3   | 60.7   | 74.6   | 39.6   | 15.9   | 40.9   | 62.7   | 0.667634537 | 46.975   | 39.775   | 7.2     | 1.181018228 | 0.7513   | -1.152 |
| 104632_at   | 553.2  | 650.1  | 464    | 514.8  | 610.9  | 535.4  | 480.1  | 468.3  | 0.684195961 | 545.525  | 523.675  | 21.85   | 1.041724352 | 0.6917   | 1.04   |
| 104633_at   | 196.2  | 231.4  | 358.1  | 447.4  | 235.8  | 223    | 605.4  | 465    | 0.528686274 | 308.275  | 382.3    | 74.025  | 0.806369343 | 0.5908   | 1.194  |
| 104634_at   | 1314.6 | 1292.1 | 1537.1 | 1477.9 | 1552.3 | 1363   | 1627.8 | 1509.7 | 0.237620348 | 1405.425 | 1513.2   | 107.775 | 0.928776764 | 0.2389   | 1.077  |
| 104635_r_at | 110.3  | 122.3  | 167.6  | 146.4  | 113.4  | 51.8   | 103.4  | 154.8  | 0.268796417 | 136.65   | 105.85   | 30.8    | 1.290977799 | 0.2535   | -1.37  |
| 104636_at   | 4981.1 | 4888.6 | 3470.9 | 3078.8 | 2286   | 2058.7 | 2005.2 | 1885.7 | 0.022754936 | 4104.85  | 2058.9   | 2045.95 | 1.993710234 | 0.001929 | -1.956 |
| 104637_at   | 5751.3 | 6183.3 | 4355   | 4229.8 | 3149.7 | 2589.5 | 2851   | 2612.8 | 0.014671832 | 5129.85  | 2800.75  | 2329.1  | 1.831598679 | 0.001406 | -1.812 |
| 104638_at   | 111.3  | 152.4  | 110.3  | 109.6  | 160.9  | 176.5  | 82.4   | 118.1  | 0.595684492 | 120.9    | 134.475  | 13.575  | 0.899051868 | 0.7076   | 1.078  |
| 104639_i_at | 519.3  | 558.7  | 627.8  | 676.5  | 783.5  | 603.2  | 651.4  | 747.1  | 0.115476509 | 595.575  | 696.3    | 100.725 | 0.855342525 | 0.1141   | 1.169  |
| 104640_f_at | 621.6  | 543    | 538.9  | 663    | 766.2  | 623    | 679.9  | 718.3  | 0.049838761 | 591.625  | 696.85   | 105.225 | 0.848999067 | 0.05012  | 1.179  |
| 104641_f_at | 1019.2 | 599    | 709.2  | 874.5  | 613.5  | 945.6  | 560.6  | 849.2  | 0.671176066 | 800.475  | 742.225  | 58.25   | 1.078480245 | 0.6616   | -1.082 |
| 104642_at   | 42.1   | 32.1   | 55.4   | 31.4   | 34     | 96.4   | 57.7   | 28.1   | 0.452190526 | 40.25    | 54.05    | 13.8    | 0.744680851 | 0.5329   | 1.226  |
| 104643_at   | 106.9  | 87.5   | 104.8  | 147.8  | 75.8   | 134.9  | 87.7   | 101.3  | 0.537005555 | 111.75   | 99.925   | 11.825  | 1.118338754 | 0.5052   | -1.123 |
| 104644_at   | 628.7  | 629.1  | 597.7  | 577    | 687.8  | 513.8  | 656.2  | 503.9  | 0.740332664 | 608.125  | 590.425  | 17.7    | 1.029978405 | 0.6597   | -1.039 |
| 104645_at   | 200.8  | 337.2  | 350.1  | 339.9  | 379    | 249.5  | 326.4  | 345    | 0.703383417 | 307      | 324.975  | 17.975  | 0.944688053 | 0.6805   | 1.072  |
| 104646_at   | 303.8  | 231.6  | 275.6  | 351.6  | 74.3   | 63.4   | 117.6  | 89.6   | 0.001429376 | 290.65   | 86.225   | 204.425 | 3.370832125 | 0.000246 | -3.424 |
| 104647_at   | 21.4   | 15     | 11.9   | 16.2   | 22.8   | 15.9   | 16     | 8.4    | 0.924997811 | 16.125   | 15.775   | 0.35    | 1.022187005 | 0.809    | -1.063 |
| 104648_at   | 260.2  | 234    | 363.6  | 350.8  | 277.5  | 301.1  | 327.6  | 361.6  | 0.706944517 | 302.15   | 316.95   | 14.8    | 0.953304938 | 0.6398   | 1.062  |
| 104650_at   | 29.1   | 23.5   | 20.7   | 22.3   | 23.6   | 34.5   | 31.6   | 28.5   | 0.107764511 | 23.9     | 29.55    | 5.65    | 0.808798646 | 0.1049   | 1.233  |
| 104651_at   | 331.1  | 400.1  | 318    | 408.2  | 574    | 384    | 424.8  | 397.8  | 0.169419577 | 364.35   | 445.15   | 80.8    | 0.81848815  | 0.1346   | 1.213  |
| 104652_at   | 221.1  | 126.7  | 170.3  | 188.6  | 100    | 146.5  | 149.3  | 122    | 0.095265254 | 176.675  | 129.45   | 47.225  | 1.364812669 | 0.08944  | -1.355 |
| 104653_at   | 82     | 42.1   | 119.1  | 99.4   | 87.4   | 124.6  | 167.4  | 83.2   | 0.28597252  | 85.65    | 115.65   | 30      | 0.740596628 | 0.2863   | 1.387  |
| 104654_at   | 44.6   | 50.6   | 36.8   | 57.2   | 49.5   | 73.4   | 25.8   | 39.6   | 0.984543545 | 47.3     | 47.075   | 0.225   | 1.004779607 | 0.8045   | -1.063 |
| 104655_at   | 244.6  | 241.2  | 271.7  | 394.7  | 225.6  | 269.6  | 320.3  | 300.1  | 0.835219749 | 288.05   | 278.9    | 9.15    | 1.032807458 | 0.8915   | 1.02   |
| 104657_at   | 91.2   | 80.3   | 115.1  | 98.2   | 93.1   | 87.5   | 115    | 96.9   | 0.844999281 | 96.2     | 98.125   | 1.925   | 0.980382166 | 0.8183   | 1.023  |
| 104658_at   | 84.6   | 72     | 76.9   | 90     | 82.7   | 91.3   | 74.8   | 101.3  | 0.380146767 | 80.875   | 87.525   | 6.65    | 0.924021708 | 0.389    | 1.079  |
| 104659_g_at | 66.9   | 84.4   | 72.5   | 58.1   | 50.3   | 92.1   | 68.9   | 58.1   | 0.780658648 | 70.475   | 67.35    | 3.125   | 1.046399406 | 0.6968   | -1.064 |
| 104660_at   | 89.9   | 120.1  | 58.8   | 78.7   | 43.6   | 91.9   | 94.8   | 83.2   | 0.643537544 | 86.875   | 78.375   | 8.5     | 1.108452951 | 0.6435   | -1.121 |
| 104661_at   | 172.1  | 130.6  | 141.8  | 232.3  | 209.5  | 170.6  | 205    | 202.2  | 0.323407001 | 169.2    | 196.825  | 27.625  | 0.859646894 | 0.2508   | 1.189  |
| 104662_at   | 233.5  | 153.2  | 144.1  | 109.7  | 139    | 207.6  | 126.5  | 112.2  | 0.696679636 | 160.125  | 146.325  | 13.8    | 1.09431061  | 0.7083   | -1.084 |
| 104663_at   | 504.3  | 557.2  | 570.8  | 584.7  | 575.1  | 571.8  | 603.6  | 623    | 0.123044047 | 554.25   | 593.375  | 39.125  | 0.934063619 | 0.1222   | 1.072  |
| 104664_at   | 24.9   | 40.9   | 26.4   | 16.1   | 13.7   | 23.6   | 12.2   | 11.7   | 0.104769221 | 27.075   | 15.3     | 11.775  | 1.769607843 | 0.06676  | -1.75  |
| 104665_g_at | 86.6   | 34     | 43.5   | 68.3   | 64.1   | 114.5  | 106.6  | 61.7   | 0.16970609  | 58.1     | 86.725   | 28.625  | 0.669933698 | 0.1614   | 1.533  |
| 104666_at   | 186.6  | 167.6  | 169.2  | 191.7  | 174.9  | 197.9  | 164.6  | 171.2  | 0.869389884 | 178.775  | 177.15   | 1.625   | 1.009173017 | 0.8558   | 1.01   |
| 104667_at   | 16.5   | 13.5   | 8.4    | 8.6    | 28.1   | 36.8   | 7.1    | 31.4   | 0.11546072  | 11.75    | 25.85    | 14.1    | 0.454545455 | 0.1587   | 1.947  |
| 104669_at   | 27     | 30.1   | 21.3   | 24.7   | 60.1   | 31.8   | 27.5   | 43.2   | 0.131499485 | 25.775   | 40.65    | 14.875  | 0.634071341 | 0.06904  | 1.518  |
| 104670_at   | 216.2  | 239    | 366.4  | 349.5  | 328    | 174.3  | 370    | 307.1  | 0.972094723 | 292.775  | 294.85   | 2.075   | 0.992962523 | 0.984    | 1.004  |
| 104671_at   | 155    | 200    | 355.7  | 334.1  | 234.4  | 146.7  | 278.1  | 288    | 0.695642243 | 261.2    | 236.8    | 24.4    | 1.103040541 | 0.7843   | -1.075 |
| 104672_at   | 10.9   | 12.1   | 11.9   | 16.2   | 12.8   | 13.9   | 12.9   | 12.4   | 0.863367324 | 12.775   | 13       | 0.225   | 0.982692308 | 0.76     | 1.029  |
| 104673_at   | 80.6   | 60.9   | 58.8   | 71.2   | 48.3   | 96     | 89.7   | 79.9   | 0.413852993 | 67.875   | 78.475   | 10.6    | 0.864925135 | 0.5103   | 1.128  |
| 104674_s_at | 60.1   | 78.7   | 57.3   | 73.8   | 77.5   | 24.4   | 24.8   | 43.4   | 0.138340419 | 67.475   | 42.525   | 24.95   | 1.586713698 | 0.09208  | -1.771 |
| 104675_at   | 24.9   | 17.5   | 10.3   | 18.9   | 16.7   | 18.1   | 8      | 13.8   | 0.357872022 | 17.9     | 14.15    | 3.75    | 1.265017668 | 0.4026   | -1.265 |
| 104677_at   | 459.4  | 561.4  | 583.5  | 552.3  | 549.7  | 381.4  | 492.1  | 503.8  | 0.252059446 | 539.15   | 481.75   | 57.4    | 1.119148936 | 0.2628   | -1.124 |
| 104678_at   | 147.5  | 137.4  | 145    | 170.6  | 119.7  | 159.3  | 129.5  | 110.3  | 0.168640303 | 150.125  | 129.7    | 20.425  | 1.157478797 | 0.1457   | -1.165 |
| 104679_at   | 21.2   | 59.2   | 75.1   | 23.6   | 14.8   | 30.3   | 57.9   | 66.1   | 0.893506993 | 44.775   | 42.275   | 2.5     | 1.059136606 | 0.8951   | -1.067 |



|             |        |        |        |        |        |        |        |        |             |          |          |         |             |          |        |
|-------------|--------|--------|--------|--------|--------|--------|--------|--------|-------------|----------|----------|---------|-------------|----------|--------|
| 104680_at   | 573.6  | 583.6  | 516.6  | 559.1  | 512.4  | 669.1  | 732.4  | 536.5  | 0.384904692 | 558.225  | 612.6    | 54.375  | 0.911238981 | 0.3932   | 1.086  |
| 104681_at   | 315.4  | 205.8  | 275.2  | 310.1  | 201.2  | 306.2  | 258.2  | 261.2  | 0.570445647 | 276.625  | 256.7    | 19.925  | 1.07761979  | 0.6047   | -1.074 |
| 104682_at   | 416.4  | 423    | 340.2  | 412    | 370.9  | 499.7  | 358.6  | 385.3  | 0.88572408  | 397.9    | 403.625  | 5.725   | 0.985816042 | 0.9235   | 1.009  |
| 104683_at   | 632.7  | 629.7  | 693.8  | 766.6  | 664    | 586.2  | 775.7  | 752.1  | 0.807608241 | 680.7    | 694.5    | 13.8    | 0.98012959  | 0.8344   | 1.017  |
| 104684_at   | 741.7  | 537.8  | 434    | 480    | 501.5  | 591.7  | 474.6  | 473.1  | 0.630630204 | 548.375  | 510.225  | 38.15   | 1.074770934 | 0.6797   | -1.057 |
| 104685_g_at | 11.2   | 9.6    | 8.2    | 5.7    | 3.7    | 9.3    | 6.5    | 11     | 0.617167292 | 8.675    | 7.625    | 1.05    | 1.137704918 | 0.5505   | -1.195 |
| 104686_at   | 42.5   | 18.1   | 26.7   | 29.2   | 20.6   | 26.2   | 23.9   | 12.9   | 0.21968864  | 29.125   | 20.9     | 8.225   | 1.39354067  | 0.2225   | -1.378 |
| 104687_at   | 15     | 13.9   | 38.2   | 16.5   | 64.3   | 21.2   | 29.3   | 18.6   | 0.352128512 | 20.9     | 33.35    | 12.45   | 0.626686657 | 0.279    | 1.543  |
| 104688_at   | 166.8  | 140.9  | 178.2  | 143.3  | 111.8  | 162.3  | 171.3  | 136.9  | 0.500030089 | 157.3    | 145.575  | 11.725  | 1.080542676 | 0.472    | -1.09  |
| 104689_at   | 182    | 159.5  | 184.8  | 242.1  | 213.4  | 268.4  | 223.4  | 198    | 0.197822104 | 192.1    | 225.8    | 33.7    | 0.850752879 | 0.1758   | 1.182  |
| 104690_at   | 667.5  | 453.7  | 520.9  | 597.6  | 456.3  | 752    | 594.7  | 693.8  | 0.453257459 | 559.925  | 624.2    | 64.275  | 0.897028196 | 0.4898   | 1.107  |
| 104692_at   | 16.7   | 16     | 9.9    | 12.2   | 11.4   | 11.9   | 12.3   | 11.8   | 0.333755646 | 13.7     | 11.85    | 1.85    | 1.156118143 | 0.3727   | -1.128 |
| 104693_at   | 224.3  | 208.1  | 266.1  | 195.1  | 206.5  | 223.8  | 206.5  | 215.3  | 0.557118311 | 223.4    | 213.025  | 10.375  | 1.048703204 | 0.5749   | -1.042 |
| 104694_at   | 296.2  | 247.5  | 364.7  | 338.6  | 350.7  | 326.5  | 285.6  | 290.3  | 0.961390212 | 311.75   | 313.275  | 1.525   | 0.995132072 | 0.9072   | 1.012  |
| 104695_at   | 191.1  | 46.4   | 150.8  | 124.5  | 96     | 141.3  | 86     | 77.2   | 0.44877455  | 128.2    | 100.125  | 28.075  | 1.280399501 | 0.6656   | -1.166 |
| 104696_at   | 93.7   | 63.1   | 114.7  | 92.6   | 121.3  | 173.6  | 143.5  | 101.9  | 0.061976069 | 91.025   | 135.075  | 44.05   | 0.673884879 | 0.05693  | 1.488  |
| 104697_at   | 912.3  | 697    | 565.7  | 632.5  | 286    | 615.4  | 900.1  | 690.4  | 0.617277138 | 701.875  | 622.975  | 78.9    | 1.126650347 | 0.5175   | -1.201 |
| 104698_at   | 638.9  | 572.9  | 878.2  | 1079.9 | 443    | 559.7  | 917.5  | 852.8  | 0.56450925  | 792.475  | 693.25   | 99.225  | 1.143130184 | 0.544    | -1.157 |
| 104699_at   | 348.6  | 323.4  | 391.2  | 463.3  | 395.6  | 360.5  | 430.8  | 429.3  | 0.550290947 | 381.625  | 404.05   | 22.425  | 0.944499443 | 0.4998   | 1.066  |
| 104700_at   | 13.2   | 28.7   | 15.9   | 23.9   | 9.1    | 11.7   | 18.9   | 16.4   | 0.188438973 | 20.425   | 14.025   | 6.4     | 1.456327986 | 0.1813   | -1.446 |
| 104701_at   | 267.9  | 221.1  | 384.6  | 411.5  | 235.8  | 172.3  | 304.8  | 283.2  | 0.239501362 | 321.275  | 249.025  | 72.25   | 1.290131513 | 0.2542   | -1.279 |
| 104702_at   | 133.6  | 122.5  | 149.4  | 119.7  | 101.3  | 73.9   | 129.3  | 109.7  | 0.093517429 | 131.3    | 103.55   | 27.75   | 1.26798648  | 0.09381  | -1.289 |
| 104704_at   | 456.4  | 392.2  | 552.4  | 420.1  | 541.8  | 572    | 578.9  | 556.7  | 0.05117448  | 455.275  | 562.35   | 107.075 | 0.809593669 | 0.02718  | 1.245  |
| 104706_at   | 228.7  | 203.6  | 263.6  | 302.8  | 229.4  | 248.1  | 260.3  | 222.8  | 0.702922078 | 249.675  | 240.15   | 9.525   | 1.039662711 | 0.7612   | -1.03  |
| 104707_at   | 180.5  | 204.3  | 158.2  | 226.3  | 144.8  | 178.6  | 119.3  | 167.2  | 0.090292772 | 192.325  | 152.475  | 39.85   | 1.26135432  | 0.09406  | -1.265 |
| 104708_at   | 211    | 356.1  | 317.4  | 401.1  | 200.4  | 326.1  | 296.5  | 279    | 0.387236093 | 321.4    | 275.5    | 45.9    | 1.166606171 | 0.4465   | -1.153 |
| 104709_at   | 2606.7 | 2536   | 2643.9 | 2016   | 2582.1 | 2845.4 | 2909.4 | 2458   | 0.225023662 | 2450.65  | 2698.725 | 248.075 | 0.908076962 | 0.2323   | 1.105  |
| 104710_at   | 582.1  | 495.6  | 577.2  | 479.8  | 434.4  | 544.4  | 389.2  | 426    | 0.09616722  | 533.675  | 448.5    | 85.175  | 1.189910814 | 0.08776  | -1.195 |
| 104711_at   | 954.7  | 1114.3 | 1155.3 | 971.3  | 1140.6 | 903.7  | 1141.4 | 1126.6 | 0.718118756 | 1048.9   | 1078.075 | 29.175  | 0.972937875 | 0.7386   | 1.026  |
| 104712_at   | 70.6   | 102.6  | 114.4  | 132.6  | 105.8  | 76.1   | 89.6   | 132.3  | 0.825295928 | 105.05   | 100.95   | 4.1     | 1.040614165 | 0.8505   | -1.036 |
| 104713_at   | 904.8  | 868.8  | 704.5  | 719.9  | 839.5  | 653    | 647.3  | 777.6  | 0.35315392  | 799.5    | 729.35   | 70.15   | 1.096181532 | 0.3507   | -1.096 |
| 104714_at   | 680.5  | 561.9  | 574.7  | 852.5  | 925    | 725.7  | 941    | 1014.4 | 0.042847532 | 667.4    | 901.525  | 234.125 | 0.740301156 | 0.04362  | 1.36   |
| 104715_at   | 891.5  | 804.9  | 1218.8 | 1574.7 | 796.2  | 874.4  | 1137.2 | 968.3  | 0.400229647 | 1122.475 | 944.025  | 178.45  | 1.189031011 | 0.4241   | -1.158 |
| 104716_at   | 2115.2 | 2575.9 | 1653.1 | 1664.9 | 1914.5 | 1941.6 | 1679.9 | 1835.6 | 0.527536743 | 2002.275 | 1842.9   | 159.375 | 1.086480547 | 0.5681   | -1.07  |
| 104717_at   | 3472.3 | 3361.3 | 3242.7 | 3110.2 | 3519.9 | 2991.7 | 2852.2 | 2786.1 | 0.227160941 | 3296.625 | 3037.475 | 259.15  | 1.085317575 | 0.19     | -1.089 |
| 104719_at   | 535.9  | 433.6  | 628.3  | 804.7  | 557.3  | 531.3  | 539.6  | 742.2  | 0.934810886 | 600.625  | 592.6    | 8.025   | 1.013542018 | 0.9885   | 1.002  |
| 104720_at   | 584.4  | 521.3  | 647.5  | 663.9  | 494.8  | 637.4  | 643.9  | 706.4  | 0.778423614 | 604.275  | 620.625  | 16.35   | 0.973655589 | 0.8166   | 1.023  |
| 104722_at   | 209.4  | 167.4  | 183.3  | 234.2  | 169.3  | 215.9  | 198.6  | 197.6  | 0.861401032 | 198.575  | 195.35   | 3.225   | 1.01650883  | 0.8984   | -1.012 |
| 104723_at   | 3      | 19.6   | 1.7    | 2      | 4      | 4.5    | 2      | 3.7    | 0.538419658 | 6.575    | 3.55     | 3.025   | 1.852112676 | 0.8789   | -1.099 |
| 104725_at   | 357.7  | 330.8  | 619.9  | 531.7  | 565.4  | 384    | 535.5  | 486.2  | 0.700048602 | 460.025  | 492.775  | 32.75   | 0.933539648 | 0.6139   | 1.097  |
| 104726_at   | 180.5  | 169.5  | 143.3  | 166.7  | 163.7  | 222    | 171.5  | 168.9  | 0.342133012 | 165      | 181.525  | 16.525  | 0.908965707 | 0.327    | 1.096  |
| 104727_at   | 70.5   | 52.6   | 72.1   | 95.7   | 22.2   | 101.5  | 87.2   | 72.4   | 0.926198737 | 72.725   | 70.825   | 1.9     | 1.026826685 | 0.7035   | -1.158 |
| 104728_at   | 494.5  | 439    | 424.8  | 457.5  | 642.3  | 523.5  | 625.9  | 639.6  | 0.006190629 | 453.95   | 607.825  | 153.875 | 0.746843253 | 0.002644 | 1.337  |
| 104729_at   | 48.6   | 67.7   | 81.2   | 25.1   | 43.7   | 36.1   | 28.6   | 95.9   | 0.822888513 | 55.65    | 51.075   | 4.575   | 1.089574156 | 0.7759   | -1.116 |
| 104730_at   | 192    | 187.5  | 244.1  | 423.2  | 195.7  | 217.1  | 280.9  | 296.2  | 0.825206422 | 261.7    | 247.475  | 14.225  | 1.057480554 | 0.9545   | -1.013 |
| 104731_at   | 174.3  | 161.2  | 231.6  | 281.3  | 173.5  | 137.9  | 246    | 212.6  | 0.609007129 | 212.1    | 192.5    | 19.6    | 1.101818182 | 0.6164   | -1.1   |
| 104733_at   | 308.7  | 342.3  | 349.3  | 350.5  | 345.2  | 314.1  | 365.2  | 343.6  | 0.774166093 | 337.7    | 342.025  | 4.325   | 0.987354726 | 0.78     | 1.013  |
| 104735_at   | 325.6  | 461.5  | 642.4  | 817.1  | 566.4  | 455.2  | 889    | 789.8  | 0.467469347 | 561.65   | 675.1    | 113.45  | 0.831950822 | 0.4415   | 1.231  |
| 104737_at   | 12     | 21     | 3.7    | 8.6    | 4.3    | 5.8    | 3.9    | 7.1    | 0.195569083 | 11.325   | 5.275    | 6.05    | 2.146919431 | 0.163    | -1.851 |
| 104738_at   | 972    | 1276.4 | 1395.5 | 1569.3 | 1731.2 | 1264.8 | 1417.2 | 1638   | 0.250631289 | 1303.3   | 1512.8   | 209.5   | 0.861515071 | 0.2545   | 1.17   |
| 104739_at   | 588.9  | 521.1  | 489.2  | 494.2  | 550.3  | 741.3  | 541.9  | 580    | 0.192897454 | 523.35   | 603.375  | 80.025  | 0.867371038 | 0.1561   | 1.147  |
| 104740_at   | 678.2  | 769.8  | 917.3  | 924.8  | 887.1  | 723.6  | 900.9  | 846.7  | 0.822269698 | 822.525  | 839.575  | 17.05   | 0.979692106 | 0.7898   | 1.025  |
| 104741_at   | 288.3  | 435.2  | 458.7  | 420.7  | 390    | 310.9  | 395    | 349.2  | 0.406027603 | 400.725  | 361.275  | 39.45   | 1.109196595 | 0.4687   | -1.097 |
| 104742_at   | 56.7   | 23.5   | 25.2   | 45.8   | 48.3   | 99.9   | 70.9   | 49.2   | 0.098322977 | 37.8     | 67.075   | 29.275  | 0.563548267 | 0.07524  | 1.818  |
| 104743_at   | 8.8    | 42.4   | 23.6   | 7.5    | 7.1    | 11.4   | 4.6    | 5.7    | 0.198752015 | 20.575   | 7.2      | 13.375  | 2.857638889 | 0.1079   | -2.368 |
| 104744_at   | 950.6  | 1319.2 | 1563.5 | 1397.8 | 1484.9 | 1237   | 1505.8 | 1414.8 | 0.509844774 | 1307.775 | 1410.625 | 102.85  | 0.927089056 | 0.4717   | 1.093  |



|             |        |        |        |        |        |        |        |        |             |          |          |         |             |          |        |
|-------------|--------|--------|--------|--------|--------|--------|--------|--------|-------------|----------|----------|---------|-------------|----------|--------|
| 104745_at   | 778.6  | 720.1  | 847.8  | 855.7  | 951    | 688.4  | 858.7  | 883.2  | 0.518740517 | 800.55   | 845.325  | 44.775  | 0.947032207 | 0.559    | 1.051  |
| 104746_at   | 922    | 1106.9 | 853.6  | 836.9  | 1075.8 | 1065   | 1102.9 | 1070.2 | 0.094330777 | 929.85   | 1078.475 | 148.625 | 0.862189666 | 0.05276  | 1.167  |
| 104747_at   | 2.9    | 2.5    | 3.1    | 7.3    | 3.6    | 6.5    | 3.2    | 3.6    | 0.847181625 | 3.95     | 4.225    | 0.275   | 0.934911243 | 0.7052   | 1.122  |
| 104748_s_at | 1.9    | 5.5    | 4.4    | 9      | 3.6    | 6.6    | 28.3   | 5.1    | 0.406032674 | 5.2      | 10.9     | 5.7     | 0.47706422  | 0.3772   | 1.704  |
| 104749_at   | 268.4  | 209.1  | 294.1  | 368    | 244.7  | 319.3  | 297    | 327.6  | 0.759887044 | 284.9    | 297.15   | 12.25   | 0.958775029 | 0.6908   | 1.058  |
| 104750_at   | 16.9   | 7.1    | 16.6   | 29.8   | 45.4   | 69.4   | 15.4   | 56.1   | 0.080342634 | 17.6     | 46.575   | 28.975  | 0.377885132 | 0.07566  | 2.6    |
| 104751_at   | 11.7   | 34.2   | 19.2   | 4.8    | 15.7   | 21.3   | 25.5   | 7.5    | 0.99743765  | 17.475   | 17.5     | 0.025   | 0.998571429 | 0.7905   | 1.147  |
| 104752_at   | 773.6  | 757.9  | 586.2  | 605.8  | 730.2  | 626.7  | 720.5  | 673.4  | 0.906328566 | 680.875  | 687.7    | 6.825   | 0.990075614 | 0.8491   | 1.016  |
| 104754_at   | 552.1  | 434    | 526.3  | 623    | 423.9  | 429    | 500.8  | 570.4  | 0.350870814 | 533.85   | 481.025  | 52.825  | 1.109817577 | 0.3539   | -1.109 |
| 104755_at   | 576.4  | 595.5  | 582.1  | 688.2  | 551.9  | 644.6  | 559.2  | 600.2  | 0.547808842 | 610.55   | 588.975  | 21.575  | 1.036631436 | 0.5427   | -1.036 |
| 104756_at   | 878.1  | 832.9  | 720.2  | 608.7  | 823.8  | 905.7  | 545.6  | 648.4  | 0.78516499  | 759.975  | 730.875  | 29.1    | 1.03981529  | 0.7425   | -1.05  |
| 104757_at   | 105.5  | 121.8  | 132.5  | 126    | 103.3  | 236.5  | 177.4  | 135.3  | 0.244326391 | 121.45   | 163.125  | 41.675  | 0.744521073 | 0.2222   | 1.286  |
| 104758_at   | 410.3  | 377.6  | 367.8  | 339.2  | 411    | 362.5  | 321.6  | 297.4  | 0.417270763 | 373.725  | 348.125  | 25.6    | 1.073536804 | 0.3825   | -1.079 |
| 104759_at   | 361.4  | 393    | 393.3  | 389.5  | 420.7  | 327.8  | 441.2  | 426.5  | 0.508611605 | 384.3    | 404.05   | 19.75   | 0.951119911 | 0.5587   | 1.045  |
| 104760_at   | 677.6  | 543    | 739    | 670.7  | 538    | 579.3  | 564.3  | 646.3  | 0.173529568 | 657.575  | 581.975  | 75.6    | 1.129902487 | 0.1714   | -1.125 |
| 104761_at   | 527.9  | 557    | 565.5  | 586.2  | 733.2  | 637.9  | 746.4  | 649.3  | 0.011664645 | 559.15   | 691.7    | 132.55  | 0.808370681 | 0.003758 | 1.235  |
| 104762_r_at | 1065.9 | 1162.1 | 1048.4 | 1007.9 | 1000.4 | 1078.4 | 1002.7 | 1245.6 | 0.878186103 | 1071.075 | 1081.775 | 10.7    | 0.990108849 | 0.9073   | 1.007  |
| 104763_at   | 372.3  | 415.9  | 409.7  | 428.4  | 347.9  | 454.2  | 581.6  | 466.1  | 0.330843727 | 406.575  | 462.45   | 55.875  | 0.879176127 | 0.3392   | 1.12   |
| 104766_at   | 1285.6 | 1318.1 | 1498   | 1587.1 | 1593.6 | 1133.4 | 1092.1 | 1447.5 | 0.490078804 | 1422.2   | 1316.65  | 105.55  | 1.080165572 | 0.4445   | -1.09  |
| 104767_f_at | 452.3  | 374.1  | 295.3  | 349.1  | 488.3  | 269.7  | 277.4  | 342.1  | 0.714229985 | 367.7    | 344.375  | 23.325  | 1.067731397 | 0.6271   | -1.087 |
| 160060_at   | 7.7    | 11.7   | 2.5    | 6      | 3.8    | 23.1   | 7.6    | 12.4   | 0.357156098 | 6.975    | 11.725   | 4.75    | 0.594882729 | 0.4019   | 1.574  |
| 160061_at   | 26     | 20.4   | 11.6   | 20.4   | 14.8   | 21.3   | 17.4   | 14.8   | 0.488412956 | 19.6     | 17.075   | 2.525   | 1.147877013 | 0.5896   | -1.115 |
| 160062_i_at | 12.9   | 17     | 8      | 12     | 9.7    | 12.5   | 7.1    | 20.1   | 0.971724454 | 12.475   | 12.35    | 0.125   | 1.010121457 | 0.8535   | -1.053 |
| 160063_i_at | 4.2    | 2.9    | 2.6    | 5.8    | 4.5    | 6.6    | 2.3    | 5.2    | 0.52855121  | 3.875    | 4.65     | 0.775   | 0.833333333 | 0.5798   | 1.183  |
| 160064_at   | 789.5  | 712.2  | 962.5  | 881.5  | 848.8  | 987.4  | 940.7  | 955.7  | 0.184101924 | 836.425  | 933.15   | 96.725  | 0.896345711 | 0.1697   | 1.121  |
| 160065_s_at | 2223.2 | 2629.9 | 2546.1 | 2573.4 | 1890.3 | 1953.3 | 2509.6 | 2494.8 | 0.206259511 | 2493.15  | 2212     | 281.15  | 1.12710217  | 0.19     | -1.135 |
| 160066_at   | 262.4  | 296.3  | 346.5  | 380.2  | 325.3  | 313.9  | 350.4  | 374.2  | 0.537683518 | 321.35   | 340.95   | 19.6    | 0.942513565 | 0.49     | 1.069  |
| 160067_at   | 267.6  | 276.8  | 262.2  | 306.4  | 331.1  | 348.9  | 258    | 311.5  | 0.189124038 | 278.25   | 312.375  | 34.125  | 0.890756303 | 0.1858   | 1.118  |
| 160068_at   | 139.2  | 167.8  | 184.4  | 219.9  | 264.3  | 172    | 177.5  | 214.2  | 0.325694574 | 177.825  | 207      | 29.175  | 0.859057971 | 0.3165   | 1.162  |
| 160069_at   | 444    | 417.2  | 585.9  | 621.4  | 544.3  | 565.8  | 609.3  | 520.5  | 0.475180681 | 517.125  | 559.975  | 42.85   | 0.923478727 | 0.4101   | 1.097  |
| 160070_at   | 63.8   | 60.3   | 42.5   | 46.4   | 64.9   | 80.7   | 52.3   | 45.9   | 0.442023495 | 53.25    | 60.95    | 7.7     | 0.87366694  | 0.4555   | 1.135  |
| 160071_at   | 705.9  | 775    | 513.5  | 647.4  | 777.4  | 590.1  | 591.4  | 625.1  | 0.846095734 | 660.45   | 646      | 14.45   | 1.022368421 | 0.8784   | -1.018 |
| 160072_at   | 449.4  | 432.7  | 318.4  | 339    | 349.3  | 343.1  | 313.4  | 340.1  | 0.238769043 | 384.875  | 336.475  | 48.4    | 1.143844268 | 0.2146   | -1.132 |
| 160073_i_at | 189.5  | 172    | 123.8  | 196.2  | 124.8  | 222.9  | 172.4  | 150.7  | 0.922954606 | 170.375  | 167.7    | 2.675   | 1.015951103 | 0.8921   | -1.023 |
| 160074_at   | 159.3  | 151.2  | 106.9  | 197.7  | 159.2  | 240.1  | 168.3  | 183    | 0.240622687 | 153.775  | 187.65   | 33.875  | 0.819477751 | 0.2296   | 1.233  |
| 160075_at   | 354.7  | 315    | 325.5  | 384.7  | 399.2  | 327.6  | 340.1  | 443.5  | 0.344983086 | 344.975  | 377.6    | 32.625  | 0.913599047 | 0.3449   | 1.09   |
| 160076_at   | 1734   | 1646.4 | 1756.6 | 1422.4 | 1626.3 | 1585.1 | 1563.5 | 1445.1 | 0.372335456 | 1639.85  | 1555     | 84.85   | 1.054565916 | 0.3895   | -1.052 |
| 160077_at   | 24.2   | 41.4   | 28.3   | 28.6   | 20.1   | 27.3   | 37.7   | 69.7   | 0.526527356 | 30.625   | 38.7     | 8.075   | 0.791343669 | 0.6372   | 1.154  |
| 160078_at   | 2046.8 | 2278.8 | 1856.5 | 1768.5 | 2170   | 2362.6 | 1872.7 | 2113.1 | 0.385594824 | 1987.65  | 2129.6   | 141.95  | 0.93334429  | 0.3777   | 1.073  |
| 160079_i_at | 355.1  | 373.5  | 385.1  | 500.8  | 414.1  | 290.5  | 399.9  | 518.9  | 0.970360936 | 403.625  | 405.85   | 2.225   | 0.994517679 | 0.9671   | 1.006  |
| 160080_r_at | 16     | 9.7    | 8.1    | 9.8    | 7.7    | 17.4   | 10.4   | 10.3   | 0.84630079  | 10.9     | 11.45    | 0.55    | 0.951965066 | 0.863    | 1.041  |
| 160081_at   | 973    | 1482   | 1072.1 | 1323.8 | 1371.3 | 1010.4 | 1285.8 | 1188.9 | 0.992509771 | 1212.725 | 1214.1   | 1.375   | 0.998867474 | 0.9436   | 1.009  |
| 160082_s_at | 3034.9 | 3062.5 | 3818.1 | 2793.1 | 3468.2 | 3231.6 | 3868.2 | 3607.2 | 0.216883492 | 3177.15  | 3543.8   | 366.65  | 0.896537615 | 0.1877   | 1.121  |
| 160083_at   | 142    | 293    | 197.6  | 241.3  | 217.7  | 218.3  | 440.2  | 289.7  | 0.288295332 | 218.475  | 291.475  | 73      | 0.749549704 | 0.2649   | 1.322  |
| 160084_at   | 760.7  | 639.1  | 612.3  | 633.6  | 679.4  | 755.3  | 676.6  | 647.7  | 0.515857084 | 661.425  | 689.75   | 28.325  | 0.958934397 | 0.4815   | 1.045  |
| 160085_at   | 1575   | 1498.1 | 1295.5 | 1046.9 | 1847.6 | 1660.4 | 1585.5 | 1341.4 | 0.158286227 | 1353.875 | 1608.725 | 254.85  | 0.84158262  | 0.1668   | 1.195  |
| 160086_at   | 11.7   | 11.4   | 8.5    | 15.4   | 11.4   | 16.7   | 7.3    | 5.5    | 0.617909387 | 11.75    | 10.225   | 1.525   | 1.149144254 | 0.4848   | -1.227 |
| 160087_at   | 111.9  | 82.7   | 58     | 81.1   | 60.8   | 93.8   | 78.8   | 64.7   | 0.532930715 | 83.425   | 74.525   | 8.9     | 1.119423012 | 0.5669   | -1.106 |
| 160088_at   | 5.8    | 14.3   | 40.8   | 7.7    | 8      | 10     | 9.2    | 10.5   | 0.41049408  | 17.15    | 9.425    | 7.725   | 1.819628647 | 0.5066   | -1.36  |
| 160089_at   | 5182.9 | 5199.3 | 4657.1 | 4616   | 5646.8 | 5673.4 | 4291.2 | 5183.6 | 0.46963407  | 4913.825 | 5198.75  | 284.925 | 0.945193556 | 0.5047   | 1.053  |
| 160090_f_at | 8454.4 | 8016.7 | 6942.3 | 6031.5 | 7731.2 | 7737.2 | 7923.7 | 7475.5 | 0.563629072 | 7361.225 | 7716.9   | 355.675 | 0.953909601 | 0.4978   | 1.057  |
| 160091_at   | 2781   | 3417.2 | 3652.6 | 3823.7 | 3284.6 | 2429.9 | 3202.3 | 3196.2 | 0.246946468 | 3418.625 | 3028.25  | 390.375 | 1.128911087 | 0.271    | -1.129 |
| 160092_at   | 442.9  | 407.6  | 857.8  | 937    | 602.4  | 662.9  | 698.4  | 789    | 0.861368393 | 661.325  | 688.175  | 26.85   | 0.960983761 | 0.6588   | 1.11   |
| 160093_r_at | 264.6  | 78.5   | 240.5  | 295.8  | 224.8  | 123.2  | 204.6  | 283.5  | 0.860553196 | 219.85   | 209.025  | 10.825  | 1.051788064 | 0.9551   | 1.021  |
| 160094_at   | 1673   | 1555.5 | 1583.4 | 1486.5 | 1427.1 | 1385.6 | 1224.5 | 1404.1 | 0.012470238 | 1574.6   | 1360.325 | 214.275 | 1.157517505 | 0.01365  | -1.159 |
| 160095_at   | 488.8  | 646.9  | 908.8  | 1343.2 | 987.6  | 794    | 1478.1 | 1126.7 | 0.33323782  | 846.925  | 1096.6   | 249.675 | 0.772318986 | 0.2756   | 1.356  |



|             |        |        |        |        |        |        |        |        |             |          |          |         |             |          |        |
|-------------|--------|--------|--------|--------|--------|--------|--------|--------|-------------|----------|----------|---------|-------------|----------|--------|
| 160096_at   | 790.5  | 788.9  | 698.4  | 708.1  | 748.6  | 867.2  | 750    | 820.9  | 0.238475046 | 746.475  | 796.675  | 50.2    | 0.936988107 | 0.2361   | 1.067  |
| 160097_at   | 62.1   | 35.1   | 13.8   | 22.1   | 19.8   | 34.2   | 24.6   | 11.5   | 0.403719337 | 33.275   | 22.525   | 10.75   | 1.477247503 | 0.4605   | -1.365 |
| 160098_s_at | 645.9  | 514.1  | 655.2  | 639.3  | 476.9  | 651.1  | 600.7  | 578.3  | 0.484722764 | 613.625  | 576.75   | 36.875  | 1.063935847 | 0.4959   | -1.066 |
| 160099_at   | 271.6  | 201.2  | 247.5  | 290.5  | 376.2  | 304.6  | 290.7  | 302.8  | 0.052974981 | 252.7    | 318.575  | 65.875  | 0.793219807 | 0.0543   | 1.266  |
| 160100_at   | 641.9  | 667.7  | 701    | 904    | 549.6  | 498    | 566.4  | 627.5  | 0.059507757 | 728.65   | 560.375  | 168.275 | 1.300289984 | 0.02983  | -1.293 |
| 160101_at   | 3564.9 | 3186.6 | 3318.9 | 2076.4 | 3077.4 | 4078.5 | 2870.7 | 2233.3 | 0.957204898 | 3036.7   | 3064.975 | 28.275  | 0.990774802 | 0.9698   | 1.007  |
| 160102_at   | 1989.5 | 2002.8 | 2345.9 | 2084.5 | 2617   | 2560   | 2030   | 2286.2 | 0.152723123 | 2105.675 | 2373.3   | 267.625 | 0.887235074 | 0.1453   | 1.124  |
| 160103_at   | 1144.5 | 1506.7 | 1530   | 1672.4 | 1760.1 | 1478.8 | 1835.7 | 1729.5 | 0.138595241 | 1463.4   | 1701.025 | 237.625 | 0.860304816 | 0.1486   | 1.17   |
| 160104_at   | 347.8  | 283    | 400.6  | 328.9  | 398.7  | 436.2  | 301.8  | 372.1  | 0.359720698 | 340.075  | 377.2    | 37.125  | 0.901577413 | 0.3728   | 1.108  |
| 160105_r_at | 165.6  | 103.2  | 136    | 129.8  | 125    | 179    | 100.6  | 152.6  | 0.799962695 | 133.65   | 139.3    | 5.65    | 0.959440057 | 0.8436   | 1.033  |
| 160106_at   | 444    | 586.9  | 469.2  | 452.8  | 526.3  | 309.2  | 263.6  | 340.1  | 0.114153522 | 488.225  | 359.8    | 128.425 | 1.356934408 | 0.08445  | -1.396 |
| 160107_at   | 1787.7 | 1587.6 | 2054.3 | 1800.6 | 1879.1 | 1899.1 | 2316.8 | 1935.3 | 0.206324008 | 1807.55  | 2007.575 | 200.025 | 0.900364868 | 0.1949   | 1.111  |
| 160108_at   | 157.4  | 203.3  | 163.1  | 104.5  | 272.2  | 299.2  | 276.6  | 269.3  | 0.006027282 | 157.075  | 279.325  | 122.25  | 0.562337779 | 0.005194 | 1.826  |
| 160109_at   | 1466.1 | 1703   | 1686.1 | 1245.1 | 1274.8 | 1511.7 | 1113.9 | 1054.6 | 0.102312731 | 1525.075 | 1238.75  | 286.325 | 1.231140262 | 0.1018   | -1.234 |
| 160110_at   | 648.3  | 792.6  | 574.1  | 531.1  | 602.4  | 746.3  | 578.2  | 649.6  | 0.915680838 | 636.525  | 644.125  | 7.6     | 0.988201048 | 0.8628   | 1.019  |
| 160111_at   | 499.3  | 565.2  | 604.5  | 505.2  | 593.2  | 570.6  | 700.7  | 594.6  | 0.115095323 | 543.55   | 614.775  | 71.225  | 0.884144606 | 0.1061   | 1.131  |
| 160112_at   | 154.3  | 138    | 213.7  | 278.5  | 184    | 176.6  | 256.3  | 242.9  | 0.639249171 | 196.125  | 214.95   | 18.825  | 0.912421493 | 0.552    | 1.124  |
| 160113_at   | 608.2  | 535.1  | 637.8  | 625.8  | 478.4  | 647.4  | 507.6  | 555.9  | 0.266865765 | 601.725  | 547.325  | 54.4    | 1.0993925   | 0.2449   | -1.104 |
| 160114_at   | 2774.3 | 3584.5 | 3278.9 | 3340.4 | 3579.2 | 3004.2 | 3364.1 | 3520.7 | 0.588461837 | 3244.525 | 3367.05  | 122.525 | 0.963610579 | 0.5816   | 1.04   |
| 160115_at   | 427.1  | 547.5  | 422.2  | 506.2  | 530.6  | 444    | 428.8  | 526.1  | 0.876173779 | 475.75   | 482.375  | 6.625   | 0.986265872 | 0.8628   | 1.015  |
| 160116_at   | 17.2   | 11.5   | 9.1    | 7.6    | 10.9   | 42.9   | 11.7   | 27.1   | 0.218044748 | 11.35    | 23.15    | 11.8    | 0.490280778 | 0.1631   | 1.819  |
| 160117_at   | 755.8  | 565.7  | 1092.9 | 807.6  | 835    | 1195.8 | 1060.1 | 1104.9 | 0.123135898 | 805.5    | 1048.95  | 243.45  | 0.767910768 | 0.1192   | 1.327  |
| 160118_at   | 1406.6 | 1761.9 | 1658.2 | 2027.8 | 1456.9 | 1482.8 | 1795.1 | 1944   | 0.810748231 | 1713.625 | 1669.7   | 43.925  | 1.026307121 | 0.8175   | -1.025 |
| 160119_at   | 521.2  | 594.4  | 634.3  | 600.6  | 646.1  | 623    | 533.8  | 610.5  | 0.660422855 | 587.625  | 603.35   | 15.725  | 0.973937184 | 0.67     | 1.027  |
| 160120_i_at | 864.1  | 885.7  | 843.6  | 832.5  | 908.1  | 1091   | 967.9  | 732.5  | 0.428831361 | 856.475  | 924.875  | 68.4    | 0.92604406  | 0.4592   | 1.069  |
| 160121_at   | 266.4  | 371.6  | 399.5  | 326.9  | 537.9  | 457.4  | 381.4  | 466.6  | 0.032737047 | 341.1    | 460.825  | 119.725 | 0.740194217 | 0.03613  | 1.356  |
| 160122_at   | 61     | 46.6   | 56.4   | 72.4   | 56.3   | 43.9   | 76.6   | 62.5   | 0.936101889 | 59.1     | 59.825   | 0.725   | 0.987881321 | 0.974    | 1.005  |
| 160123_at   | 3705.3 | 4195.7 | 2873.7 | 2712.4 | 3852.4 | 3354.4 | 2909.6 | 3116   | 0.881419038 | 3371.775 | 3308.1   | 63.675  | 1.019248209 | 0.9461   | 1.008  |
| 160124_r_at | 517.4  | 593.6  | 695.5  | 949.7  | 950.6  | 806.6  | 727.1  | 783.5  | 0.28621467  | 689.05   | 816.95   | 127.9   | 0.843442071 | 0.2265   | 1.211  |
| 160125_at   | 459.6  | 324.3  | 428.2  | 469.6  | 394    | 447    | 391.3  | 397.2  | 0.734096257 | 420.425  | 407.375  | 13.05   | 1.032034366 | 0.8119   | 1.023  |
| 160126_at   | 593.6  | 812.7  | 766.8  | 638.3  | 815    | 756.3  | 760.7  | 789.5  | 0.233336105 | 702.85   | 780.375  | 77.525  | 0.900656736 | 0.191    | 1.119  |
| 160127_at   | 206.3  | 354.3  | 457.3  | 380.4  | 463.7  | 304    | 449.6  | 368.3  | 0.497494189 | 349.575  | 396.4    | 46.825  | 0.881874369 | 0.4702   | 1.164  |
| 160128_at   | 375.4  | 515.1  | 541.3  | 565.6  | 546.6  | 358.9  | 669    | 425.5  | 0.993876015 | 499.35   | 500      | 0.65    | 0.9987      | 0.9328   | 1.015  |
| 160129_at   | 2928.9 | 2849.8 | 1980.3 | 1497   | 2568.2 | 2533.3 | 2109.7 | 1504.9 | 0.763322938 | 2314     | 2179.025 | 134.975 | 1.061942841 | 0.8311   | -1.046 |
| 160130_at   | 251.4  | 374.9  | 534.4  | 578.8  | 318.7  | 247.5  | 396.3  | 442.6  | 0.380896204 | 434.875  | 351.275  | 83.6    | 1.237990179 | 0.4485   | -1.205 |
| 160131_at   | 441.2  | 374.7  | 525.1  | 648.9  | 337.3  | 422.7  | 520.2  | 492.3  | 0.481332403 | 497.475  | 443.125  | 54.35   | 1.122651622 | 0.5037   | -1.115 |
| 160132_at   | 146.2  | 203.1  | 78.5   | 56.6   | 225.8  | 186.7  | 104.3  | 224.5  | 0.194481938 | 121.1    | 185.325  | 64.225  | 0.653446648 | 0.1923   | 1.653  |
| 160133_at   | 107.5  | 108.1  | 129.2  | 148.5  | 116.8  | 135.6  | 148.9  | 162.9  | 0.248375641 | 123.325  | 141.05   | 17.725  | 0.874335342 | 0.2437   | 1.146  |
| 160134_at   | 246.6  | 196.7  | 206    | 276.7  | 200.7  | 265.4  | 192    | 197    | 0.511055607 | 231.5    | 213.775  | 17.725  | 1.082914279 | 0.4967   | -1.083 |
| 160135_at   | 498.8  | 558.7  | 460.4  | 399.3  | 565    | 450.3  | 494.2  | 486.7  | 0.65013885  | 479.3    | 499.05   | 19.75   | 0.960424807 | 0.6197   | 1.045  |
| 160136_r_at | 228.8  | 319.9  | 337.4  | 297.1  | 365.1  | 285.4  | 515.7  | 371.5  | 0.166680174 | 295.8    | 384.425  | 88.625  | 0.769460883 | 0.1438   | 1.284  |
| 160137_at   | 337.1  | 370.7  | 363.5  | 330.3  | 290    | 269.7  | 329    | 364.8  | 0.182892625 | 350.4    | 313.375  | 37.025  | 1.118149182 | 0.1577   | -1.124 |
| 160138_at   | 597.7  | 614.3  | 648.1  | 807.7  | 578.6  | 548.3  | 645.3  | 676.5  | 0.376264514 | 666.95   | 612.175  | 54.775  | 1.089476049 | 0.3654   | -1.085 |
| 160139_at   | 528.6  | 426.3  | 526.3  | 566.8  | 1002.3 | 989.3  | 1130.8 | 822.1  | 0.001935089 | 512      | 986.125  | 474.125 | 0.519203955 | 0.000347 | 1.924  |
| 160140_at   | 325    | 308.3  | 258.8  | 310.8  | 388.4  | 300.1  | 275.9  | 333.7  | 0.440073791 | 300.725  | 324.525  | 23.8    | 0.926662045 | 0.4518   | 1.074  |
| 160141_r_at | 41.1   | 63.3   | 102.6  | 113.6  | 58.7   | 84.1   | 108.2  | 109.2  | 0.651339655 | 80.15    | 90.05    | 9.9     | 0.890061077 | 0.5751   | 1.178  |
| 160142_at   | 109.3  | 214    | 193.9  | 194.5  | 224.9  | 144.5  | 176.1  | 214.6  | 0.699137539 | 177.925  | 190.025  | 12.1    | 0.936324168 | 0.6695   | 1.086  |
| 160143_r_at | 1.6    | 1.3    | 0.8    | 2.8    | 10.4   | 8      | 15.8   | 1      | 0.100254779 | 1.625    | 8.8      | 7.175   | 0.184659091 | 0.08056  | 4.034  |
| 160144_at   | 1497.5 | 1409.6 | 1582   | 1458.4 | 1796.8 | 1631.9 | 1764.1 | 1497   | 0.066982532 | 1486.875 | 1672.45  | 185.575 | 0.889040031 | 0.05323  | 1.123  |
| 160145_at   | 457.2  | 417.3  | 310.2  | 356.2  | 377.3  | 407.1  | 416.1  | 298.6  | 0.812428328 | 385.225  | 374.775  | 10.45   | 1.027883397 | 0.8353   | 1.025  |
| 160146_r_at | 263.9  | 264    | 192.9  | 210.3  | 245.7  | 282.4  | 195.6  | 231.1  | 0.825191898 | 232.775  | 238.7    | 5.925   | 0.975178048 | 0.8211   | 1.026  |
| 160147_r_at | 22.5   | 63.1   | 33.6   | 15     | 16.8   | 90.3   | 29.6   | 33.6   | 0.661307513 | 33.55    | 42.575   | 9.025   | 0.788021139 | 0.7023   | 1.205  |
| 160148_at   | 24.6   | 6.8    | 9      | 14.1   | 6      | 58.3   | 25.5   | 15.7   | 0.353248978 | 13.625   | 26.375   | 12.75   | 0.516587678 | 0.4241   | 1.605  |
| 160149_at   | 635.8  | 967.9  | 1510.7 | 1546.2 | 938.5  | 754.5  | 1258.9 | 1015.7 | 0.514538165 | 1165.15  | 991.9    | 173.25  | 1.174664785 | 0.6415   | -1.123 |
| 160150_f_at | 5211.2 | 5907.2 | 4987.3 | 5191.6 | 5744.7 | 4993.4 | 5968.5 | 5493.4 | 0.466203398 | 5324.325 | 5550     | 225.675 | 0.959337838 | 0.4656   | 1.042  |
| 160151_i_at | 144    | 197.6  | 208    | 285.8  | 217.1  | 153.5  | 292.1  | 263.4  | 0.609295693 | 208.85   | 231.525  | 22.675  | 0.902062412 | 0.6205   | 1.11   |



|             |        |        |        |        |        |        |        |        |             |          |          |         |             |          |        |
|-------------|--------|--------|--------|--------|--------|--------|--------|--------|-------------|----------|----------|---------|-------------|----------|--------|
| 160152_at   | 1656   | 1765.6 | 1419.5 | 1298.4 | 1777.9 | 1488.5 | 1444.5 | 1398.5 | 0.958031637 | 1534.875 | 1527.35  | 7.525   | 1.004926834 | 0.9826   | 1.002  |
| 160153_at   | 2016.1 | 2192.1 | 2298.9 | 2090.5 | 2425.9 | 2400.6 | 2404.4 | 2102.3 | 0.114199643 | 2149.4   | 2333.3   | 183.9   | 0.921184588 | 0.117    | 1.085  |
| 160154_at   | 6.9    | 7      | 8.5    | 6.8    | 7.6    | 9.9    | 9.9    | 10     | 0.031702305 | 7.3      | 9.35     | 2.05    | 0.780748663 | 0.02949  | 1.277  |
| 160155_at   | 17     | 11     | 13.8   | 11.4   | 9.6    | 18.8   | 10.3   | 10.1   | 0.689802786 | 13.3     | 12.2     | 1.1     | 1.090163934 | 0.573    | -1.119 |
| 160156_at   | 385.2  | 423.5  | 573.6  | 685.1  | 516.1  | 419.2  | 625.1  | 539.8  | 0.92349486  | 516.85   | 525.05   | 8.2     | 0.98438244  | 0.8428   | 1.033  |
| 160157_at   | 123.2  | 59.1   | 67.6   | 76.5   | 78     | 104.5  | 59     | 61.5   | 0.753706373 | 81.6     | 75.75    | 5.85    | 1.077227723 | 0.7806   | -1.062 |
| 160158_at   | 4335.1 | 4719.9 | 3421.8 | 3948.9 | 4049.7 | 3216   | 3586.9 | 4022   | 0.30288004  | 4106.425 | 3718.65  | 387.775 | 1.104278434 | 0.3137   | -1.101 |
| 160159_at   | 840.1  | 900.9  | 1448.8 | 1493.5 | 1300.8 | 1064.4 | 1470.6 | 1047.9 | 0.813798664 | 1170.825 | 1220.925 | 50.1    | 0.958965538 | 0.7156   | 1.068  |
| 160160_at   | 159    | 160.1  | 137.4  | 185.2  | 136.7  | 130.5  | 117    | 124.3  | 0.034292945 | 160.425  | 127.125  | 33.3    | 1.261946903 | 0.01654  | -1.257 |
| 160161_at   | 967.3  | 905.6  | 531.8  | 429.5  | 707.9  | 722    | 533.1  | 513    | 0.570013379 | 708.55   | 619      | 89.55   | 1.144668821 | 0.6964   | -1.094 |
| 160162_at   | 2130   | 2026.2 | 2484.9 | 2185.4 | 1745.2 | 2253.1 | 2203   | 2085.5 | 0.406413467 | 2206.625 | 2071.7   | 134.925 | 1.065127673 | 0.4034   | -1.067 |
| 160163_at   | 1108   | 1033.5 | 1084.4 | 831.9  | 1228.7 | 1180.7 | 761.2  | 797.6  | 0.87854636  | 1014.45  | 992.05   | 22.4    | 1.022579507 | 0.7888   | -1.041 |
| 160164_at   | 1187.4 | 1412.5 | 1498.3 | 1646.5 | 1220.7 | 1063.6 | 1342.7 | 1432.8 | 0.221067861 | 1436.175 | 1264.95  | 171.225 | 1.135361081 | 0.2299   | -1.134 |
| 160165_at   | 615.4  | 624    | 759.6  | 647    | 577.1  | 562.5  | 462.9  | 568    | 0.03362281  | 661.5    | 542.625  | 118.875 | 1.219073946 | 0.03149  | -1.219 |
| 160166_r_at | 308.7  | 202.1  | 326    | 296.8  | 254    | 333.7  | 354.9  | 276.5  | 0.57980284  | 283.4    | 304.775  | 21.375  | 0.929866295 | 0.5725   | 1.083  |
| 160167_at   | 1487.8 | 1444.3 | 1540   | 1230.6 | 1293.1 | 1437.8 | 1109   | 1173.6 | 0.133335097 | 1425.675 | 1253.375 | 172.3   | 1.137468834 | 0.1358   | -1.139 |
| 160168_at   | 793.5  | 637    | 705.8  | 652.1  | 736.8  | 925.8  | 752.2  | 672.6  | 0.298314338 | 697.1    | 771.85   | 74.75   | 0.903154758 | 0.2836   | 1.104  |
| 160169_at   | 394.7  | 396.6  | 471.9  | 567.3  | 461    | 431.1  | 499.9  | 487.2  | 0.794022177 | 457.625  | 469.8    | 12.175  | 0.974084717 | 0.709    | 1.037  |
| 160170_at   | 4.2    | 52.2   | 31     | 27.4   | 32.6   | 23.4   | 20.3   | 41.2   | 0.953416628 | 28.7     | 29.375   | 0.675   | 0.977021277 | 0.6122   | 1.357  |
| 160171_f_at | 599    | 627.5  | 715.9  | 1024.6 | 1062.1 | 983.3  | 863.2  | 840.6  | 0.142446069 | 741.75   | 937.3    | 195.55  | 0.791368825 | 0.107    | 1.288  |
| 160172_at   | 1965   | 1676.4 | 1675.9 | 2008.2 | 2249.8 | 2512.6 | 2187.7 | 2526.4 | 0.005236217 | 1831.375 | 2369.125 | 537.75  | 0.773017464 | 0.005703 | 1.296  |
| 160173_at   | 1813.9 | 2204.2 | 1938.9 | 2326.6 | 1752   | 2521.6 | 2765.2 | 2833   | 0.216828697 | 2070.9   | 2467.95  | 397.05  | 0.839117486 | 0.2407   | 1.177  |
| 160174_at   | 531.1  | 543.9  | 501.2  | 557.8  | 641.3  | 528.5  | 506.6  | 610.6  | 0.331260254 | 533.5    | 571.75   | 38.25   | 0.933100131 | 0.325    | 1.067  |
| 160175_at   | 112.8  | 44.4   | 63.9   | 124.2  | 52.5   | 161.7  | 81     | 95.3   | 0.720064572 | 86.325   | 97.625   | 11.3    | 0.88425096  | 0.7227   | 1.133  |
| 160176_at   | 554.8  | 652.3  | 594.9  | 453    | 614.8  | 544.9  | 445.5  | 488.8  | 0.49763541  | 563.75   | 523.5    | 40.25   | 1.076886342 | 0.5114   | -1.075 |
| 160177_at   | 1878.1 | 1691.5 | 1464   | 1399.5 | 1740.9 | 1705.2 | 1584.1 | 1955.2 | 0.347139471 | 1608.275 | 1746.35  | 138.075 | 0.920935093 | 0.3235   | 1.09   |
| 160178_r_at | 66     | 32.4   | 41.1   | 70.7   | 33.5   | 68.9   | 33.7   | 21.5   | 0.379680015 | 52.55    | 39.4     | 13.15   | 1.333756345 | 0.3243   | -1.388 |
| 160179_at   | 101.6  | 98     | 110.4  | 123.9  | 102.5  | 141.9  | 134.6  | 128.9  | 0.130738712 | 108.475  | 126.975  | 18.5    | 0.854302028 | 0.1334   | 1.166  |
| 160180_at   | 254.1  | 249.8  | 289.4  | 245    | 269.3  | 340.1  | 319.4  | 295.4  | 0.050251916 | 259.575  | 306.05   | 46.475  | 0.848145728 | 0.04109  | 1.177  |
| 160181_at   | 32.9   | 58.2   | 19.2   | 28.1   | 13.5   | 50.4   | 5.7    | 9.7    | 0.310182352 | 34.6     | 19.825   | 14.775  | 1.745271122 | 0.1605   | -2.289 |
| 160182_at   | 2107.4 | 2170.5 | 2253.2 | 2679.9 | 2088.5 | 1676.9 | 1992.7 | 2407.2 | 0.236399803 | 2302.75  | 2041.325 | 261.425 | 1.128066329 | 0.2252   | -1.132 |
| 160183_f_at | 1174.2 | 1590.1 | 1512.5 | 1608.6 | 1387.8 | 1121.7 | 1609.9 | 1597.1 | 0.791644723 | 1471.35  | 1429.125 | 42.225  | 1.029546051 | 0.7872   | -1.032 |
| 160184_at   | 506.5  | 579.6  | 927.9  | 989.1  | 515.4  | 595.4  | 780.2  | 768    | 0.562416384 | 750.775  | 664.75   | 86.025  | 1.129409552 | 0.6424   | -1.1   |
| 160185_at   | 9.2    | 17.4   | 6.4    | 7.8    | 10.7   | 12.5   | 11.4   | 4.4    | 0.888545969 | 10.2     | 9.75     | 0.45    | 1.046153846 | 0.8821   | -1.052 |
| 160186_at   | 193    | 195.8  | 268.2  | 280    | 238.6  | 214.6  | 253.1  | 252.7  | 0.835903657 | 234.25   | 239.75   | 5.5     | 0.977059437 | 0.7487   | 1.036  |
| 160187_at   | 897.1  | 885.6  | 962.6  | 856.4  | 963.5  | 929.8  | 954.9  | 862.9  | 0.425031663 | 900.425  | 927.775  | 27.35   | 0.97052087  | 0.4266   | 1.03   |
| 160188_at   | 3831.8 | 3864.8 | 4086.5 | 4146.1 | 3150.7 | 2838.4 | 2743.1 | 3362   | 0.002516012 | 3982.3   | 3023.55  | 958.75  | 1.317094144 | 0.001561 | -1.321 |
| 160189_at   | 908.9  | 666.4  | 1274.5 | 1174.4 | 473.6  | 694.9  | 874.2  | 765.7  | 0.117735561 | 1006.05  | 702.1    | 303.95  | 1.432915539 | 0.1224   | -1.424 |
| 160190_at   | 5.9    | 5.4    | 6.9    | 9.5    | 3.4    | 18.4   | 3.8    | 18.6   | 0.412260414 | 6.925    | 11.05    | 4.125   | 0.626696833 | 0.717    | 1.203  |
| 160191_at   | 529.5  | 435.2  | 785.9  | 968.1  | 485.8  | 517.9  | 697.1  | 710.6  | 0.59711942  | 679.675  | 602.85   | 76.825  | 1.127436344 | 0.6948   | -1.089 |
| 160192_at   | 1936.8 | 1915.1 | 1560.2 | 1479.7 | 1524.6 | 1606   | 1882.6 | 1779.8 | 0.869835786 | 1722.95  | 1698.25  | 24.7    | 1.014544384 | 0.9032   | -1.011 |
| 160193_at   | 594.2  | 579.2  | 614.4  | 653.6  | 689.2  | 810.6  | 620.9  | 654    | 0.135965037 | 610.35   | 693.675  | 83.325  | 0.879878906 | 0.09818  | 1.132  |
| 160194_at   | 1921.8 | 2367.9 | 1477.9 | 1327.9 | 2212.5 | 2099.2 | 1626.6 | 1416.1 | 0.837550971 | 1773.875 | 1838.6   | 64.725  | 0.964796584 | 0.7969   | 1.046  |
| 160195_at   | 657.4  | 622.7  | 860.3  | 994.1  | 681    | 674.7  | 910.3  | 1011.2 | 0.778955821 | 783.625  | 819.3    | 35.675  | 0.956456731 | 0.765    | 1.048  |
| 160196_at   | 356.1  | 420.2  | 555.2  | 659.1  | 492.7  | 369.6  | 510    | 533    | 0.794207396 | 497.65   | 476.325  | 21.325  | 1.044769853 | 0.8802   | -1.026 |
| 160197_at   | 991.8  | 725.3  | 561.4  | 486    | 660.2  | 762.2  | 549.5  | 478.3  | 0.568309175 | 691.125  | 612.55   | 78.575  | 1.128275243 | 0.6164   | -1.104 |
| 160198_at   | 1487.7 | 1906.6 | 1789.7 | 1637.2 | 2178.9 | 1937.2 | 2000.9 | 1863.3 | 0.04639549  | 1705.3   | 1995.075 | 289.775 | 0.854754834 | 0.04554  | 1.173  |
| 160199_at   | 290.5  | 404.3  | 387.8  | 474.8  | 534.8  | 310.1  | 499.3  | 386.7  | 0.525979285 | 389.35   | 432.725  | 43.375  | 0.899763129 | 0.5652   | 1.103  |
| 160200_at   | 454.4  | 516.6  | 615.9  | 671.1  | 716.2  | 513.5  | 604.3  | 625.2  | 0.462639099 | 564.5    | 614.8    | 50.3    | 0.918184776 | 0.4501   | 1.094  |
| 160201_r_at | 32.7   | 38.2   | 40.9   | 51.9   | 38.4   | 30.8   | 45.6   | 47.6   | 0.95525801  | 40.925   | 40.6     | 0.325   | 1.008004926 | 0.9553   | 1.008  |
| 160202_at   | 351.8  | 465.3  | 524.3  | 530.9  | 588.9  | 482.7  | 572.5  | 557    | 0.148234545 | 468.075  | 550.275  | 82.2    | 0.850620144 | 0.1536   | 1.188  |
| 160203_at   | 1331.2 | 1335.9 | 1704.9 | 1512.1 | 1423.7 | 1296.7 | 1418.1 | 1373.5 | 0.380290838 | 1471.025 | 1378     | 93.025  | 1.067507257 | 0.3707   | -1.063 |
| 160204_at   | 730.3  | 884.6  | 810.7  | 852.8  | 764.8  | 629.6  | 652    | 808.5  | 0.103994611 | 819.6    | 713.725  | 105.875 | 1.148341448 | 0.1032   | -1.152 |
| 160205_f_at | 935.4  | 1315.9 | 1356.2 | 1366.4 | 1255.6 | 1021.1 | 1222.2 | 1222.7 | 0.613523937 | 1243.475 | 1180.4   | 63.075  | 1.053435276 | 0.6869   | -1.045 |
| 160206_at   | 76.3   | 42.7   | 203.1  | 180.7  | 31.2   | 67.6   | 146.1  | 76.9   | 0.369452998 | 125.7    | 80.45    | 45.25   | 1.562461156 | 0.4381   | -1.499 |
| 160207_at   | 1944.5 | 3317.3 | 4622.8 | 3253.4 | 3362.7 | 2139.6 | 3094.4 | 5443.5 | 0.807811639 | 3284.5   | 3510.05  | 225.55  | 0.935741656 | 0.8392   | 1.057  |



|             |        |        |        |        |        |        |        |        |             |          |          |         |             |          |        |
|-------------|--------|--------|--------|--------|--------|--------|--------|--------|-------------|----------|----------|---------|-------------|----------|--------|
| 160208_at   | 1219   | 1294.1 | 1517.2 | 1246.2 | 1332.9 | 1366   | 1237.5 | 1309.6 | 0.922005637 | 1319.125 | 1311.5   | 7.625   | 1.005813953 | 0.9613   | 1.003  |
| 160209_at   | 548.1  | 489.3  | 750.6  | 881.5  | 664.5  | 592.1  | 632    | 792.9  | 0.977533037 | 667.375  | 670.375  | 3       | 0.995524893 | 0.8667   | 1.027  |
| 160210_at   | 346.6  | 236.4  | 232.1  | 275.9  | 273.7  | 385.7  | 280.6  | 307.5  | 0.329894576 | 272.75   | 311.875  | 39.125  | 0.874549098 | 0.2988   | 1.148  |
| 160211_at   | 1087.1 | 1133.7 | 1018.7 | 905.3  | 898.2  | 1129.4 | 905.2  | 922.9  | 0.369102556 | 1036.2   | 963.925  | 72.275  | 1.0749799   | 0.356    | -1.076 |
| 160212_at   | 339.4  | 243.8  | 214.1  | 222.7  | 249    | 339.5  | 244.2  | 235    | 0.762990666 | 255      | 266.925  | 11.925  | 0.955324529 | 0.7145   | 1.053  |
| 160213_at   | 169.9  | 113.3  | 125.4  | 137.3  | 121.2  | 194.1  | 116.3  | 116.2  | 0.984055658 | 136.475  | 136.95   | 0.475   | 0.996531581 | 0.9485   | -1.01  |
| 160214_at   | 301.2  | 289    | 307.7  | 315.6  | 289.2  | 259.6  | 322.3  | 315.5  | 0.684080236 | 303.375  | 296.65   | 6.725   | 1.022669813 | 0.6464   | -1.026 |
| 160215_at   | 4054   | 3864   | 3794.3 | 2465.9 | 2997.8 | 3478   | 2501.8 | 3031   | 0.251883946 | 3544.55  | 3002.15  | 542.4   | 1.180670519 | 0.293    | -1.167 |
| 160216_f_at | 9      | 6.7    | 4.5    | 11.4   | 7.9    | 12.8   | 4.3    | 5.5    | 0.912561852 | 7.9      | 7.625    | 0.275   | 1.036065574 | 0.8517   | -1.062 |
| 160217_at   | 237.1  | 261.7  | 211    | 197.3  | 173    | 53.3   | 208.1  | 205.8  | 0.165545714 | 226.775  | 160.05   | 66.725  | 1.416900968 | 0.2081   | -1.599 |
| 160218_at   | 597.5  | 776.6  | 645.1  | 692.1  | 887    | 878.5  | 622.5  | 678.1  | 0.31018019  | 677.825  | 766.525  | 88.7    | 0.884282965 | 0.3174   | 1.123  |
| 160219_r_at | 8.1    | 3.7    | 5.7    | 6.7    | 3.1    | 3.9    | 3.1    | 7.4    | 0.271322379 | 6.05     | 4.375    | 1.675   | 1.382857143 | 0.2257   | -1.427 |
| 160220_at   | 352    | 383.1  | 273.5  | 172.3  | 281.9  | 433    | 239.3  | 235.1  | 0.975681855 | 295.225  | 297.325  | 2.1     | 0.992937022 | 0.9352   | 1.02   |
| 160221_at   | 224.6  | 216.2  | 136    | 192.7  | 184.1  | 248    | 183.3  | 210.1  | 0.598540272 | 192.375  | 206.375  | 14      | 0.932162326 | 0.5701   | 1.084  |
| 160222_i_at | 9.4    | 1.1    | 0.4    | 12.3   | 1.7    | 17.4   | 11     | 17.1   | 0.253595069 | 5.8      | 11.8     | 6       | 0.491525424 | 0.2834   | 3.213  |
| 160223_at   | 144.3  | 179.1  | 195    | 204.9  | 248.3  | 160    | 213.3  | 214.1  | 0.263495624 | 180.825  | 208.925  | 28.1    | 0.865501974 | 0.2857   | 1.151  |
| 160224_at   | 50     | 24.7   | 14.3   | 5      | 20.7   | 55.6   | 18     | 10.5   | 0.853036767 | 23.5     | 26.2     | 2.7     | 0.896946565 | 0.7164   | 1.256  |
| 160225_at   | 1571.8 | 1734.8 | 1454.7 | 1241.8 | 1651.5 | 1568   | 1227.3 | 1392.1 | 0.779724648 | 1500.775 | 1459.725 | 41.05   | 1.028121735 | 0.7905   | 1.027  |
| 160226_at   | 286.6  | 232.2  | 320.9  | 345.3  | 287    | 323    | 333    | 344.2  | 0.399937729 | 296.25   | 321.8    | 25.55   | 0.920602859 | 0.3744   | 1.096  |
| 160227_s_at | 329.3  | 369.4  | 260.3  | 269.1  | 190.7  | 359.3  | 164.3  | 325.5  | 0.433457952 | 307.025  | 259.95   | 47.075  | 1.181092518 | 0.3553   | -1.235 |
| 160228_at   | 375.8  | 451.9  | 541.5  | 461.6  | 430.7  | 391.7  | 493.8  | 454.7  | 0.723823254 | 457.7    | 442.725  | 14.975  | 1.033824609 | 0.7601   | -1.029 |
| 160229_at   | 96.5   | 77.2   | 53.9   | 68.2   | 52.5   | 47.8   | 63.9   | 49.8   | 0.101413525 | 73.95    | 53.5     | 20.45   | 1.382242991 | 0.06645  | -1.36  |
| 160230_at   | 2171.1 | 2315.7 | 1992   | 2064.9 | 2848.7 | 2267.4 | 2292.5 | 2319.1 | 0.123711791 | 2135.925 | 2431.925 | 296     | 0.87828572  | 0.09274  | 1.135  |
| 160231_at   | 580.4  | 557.4  | 652.3  | 519.1  | 468.9  | 459    | 390.1  | 407.4  | 0.006756812 | 577.3    | 431.35   | 145.95  | 1.338356323 | 0.004382 | -1.338 |
| 160232_at   | 17.7   | 37.3   | 46     | 41.1   | 38.6   | 37.5   | 43.4   | 34.5   | 0.67264139  | 35.525   | 38.5     | 2.975   | 0.922727273 | 0.5568   | 1.148  |
| 160233_at   | 372.8  | 447.9  | 481.7  | 481.5  | 364.6  | 265.1  | 382.3  | 473.1  | 0.194470428 | 445.975  | 371.275  | 74.7    | 1.201198572 | 0.1884   | -1.22  |
| 160234_at   | 1236.5 | 1202.5 | 1653.6 | 1840.9 | 1487.1 | 1313.9 | 1772.5 | 1540   | 0.816176345 | 1483.375 | 1528.375 | 45      | 0.970556964 | 0.7492   | 1.042  |
| 160235_at   | 1665.6 | 1721   | 1795.1 | 1435.9 | 2133.6 | 1724.4 | 1812   | 1678.4 | 0.208852279 | 1654.4   | 1837.1   | 182.7   | 0.90054978  | 0.202    | 1.109  |
| 160236_at   | 149.6  | 152.4  | 231.3  | 372.4  | 141.5  | 129.4  | 145.8  | 150.2  | 0.203144433 | 226.425  | 141.725  | 84.7    | 1.597636267 | 0.1177   | -1.488 |
| 160237_at   | 1154.7 | 1595.2 | 1161   | 996.8  | 1482   | 1196.7 | 1017   | 1122.8 | 0.895637038 | 1226.925 | 1204.625 | 22.3    | 1.018511985 | 0.9229   | 1.013  |
| 160238_at   | 33.9   | 25.7   | 72.2   | 53.7   | 30.4   | 95.8   | 81     | 33.6   | 0.511304984 | 46.375   | 60.2     | 13.825  | 0.770348837 | 0.5898   | 1.238  |
| 160239_at   | 3026.9 | 3168.4 | 3210.5 | 2778.4 | 3370   | 2928   | 2938.2 | 2908.2 | 0.948648753 | 3046.05  | 3036.1   | 9.95    | 1.003277231 | 0.9423   | 1.004  |
| 160240_at   | 1836   | 1934.1 | 1968.3 | 1992.6 | 2128.3 | 2005.6 | 2058.5 | 2122.8 | 0.01835628  | 1932.75  | 2078.8   | 146.05  | 0.929743121 | 0.0188   | 1.076  |
| 160241_at   | 53.5   | 28.8   | 39.6   | 67.1   | 59.7   | 69.5   | 56.1   | 78.5   | 0.113560631 | 47.25    | 65.95    | 18.7    | 0.716451857 | 0.1088   | 1.454  |
| 160242_at   | 330.8  | 253.8  | 288.8  | 361.4  | 373.7  | 278    | 280    | 342.8  | 0.776761522 | 308.7    | 318.625  | 9.925   | 0.96885053  | 0.7739   | 1.033  |
| 160243_r_at | 20.6   | 24.9   | 14.8   | 24.2   | 27.9   | 34.2   | 17.3   | 36.6   | 0.173346192 | 21.125   | 29       | 7.875   | 0.728448276 | 0.2027   | 1.345  |
| 160244_at   | 398.7  | 313.6  | 328.5  | 280.7  | 275.8  | 289.9  | 233.8  | 314.9  | 0.14287127  | 330.375  | 278.6    | 51.775  | 1.185839914 | 0.1325   | -1.183 |
| 160245_at   | 599.7  | 472    | 512    | 816.2  | 536.2  | 553.1  | 350.6  | 565.6  | 0.331223149 | 599.975  | 501.375  | 98.6    | 1.196659187 | 0.3333   | -1.191 |
| 160246_at   | 375.8  | 430.2  | 443.8  | 431.3  | 541.2  | 467.9  | 595.5  | 626.1  | 0.021217913 | 420.275  | 557.675  | 137.4   | 0.75361994  | 0.009372 | 1.322  |
| 160247_at   | 299.6  | 318.2  | 356    | 452.6  | 359.7  | 281.1  | 439.2  | 358.3  | 0.951529204 | 356.6    | 359.575  | 2.975   | 0.991726344 | 0.9478   | 1.009  |
| 160248_at   | 1160.9 | 1082.4 | 1643   | 1431.6 | 978.7  | 941.1  | 1522   | 1218.1 | 0.40958036  | 1329.475 | 1164.975 | 164.5   | 1.141204747 | 0.3859   | -1.147 |
| 160249_at   | 670.4  | 633.9  | 819.6  | 801.6  | 918.6  | 645.6  | 894    | 781.1  | 0.355270518 | 731.375  | 809.825  | 78.45   | 0.903127219 | 0.3757   | 1.104  |
| 160250_at   | 296.2  | 173    | 272.7  | 317.6  | 213.3  | 335    | 310.9  | 328.5  | 0.481865858 | 264.875  | 296.925  | 32.05   | 0.892060285 | 0.5004   | 1.132  |
| 160251_at   | 1444.3 | 1555.5 | 1629.9 | 1498.4 | 1686.4 | 1623.1 | 1378.4 | 1535.6 | 0.771482043 | 1532.025 | 1555.875 | 23.85   | 0.984671005 | 0.7984   | 1.014  |
| 160252_at   | 3341.3 | 3216.3 | 3699.3 | 4109.5 | 3660.6 | 3218.5 | 4069.1 | 4140.9 | 0.559508857 | 3591.6   | 3772.275 | 180.675 | 0.952104499 | 0.565    | 1.05   |
| 160253_at   | 2147.5 | 2456   | 2235.9 | 1834   | 2483.1 | 2286.8 | 2034.9 | 2299.3 | 0.524646614 | 2168.35  | 2276.025 | 107.675 | 0.952691644 | 0.51     | 1.053  |
| 160254_at   | 101.7  | 48.9   | 30.7   | 39.3   | 50.1   | 105.5  | 32.2   | 67.9   | 0.708235124 | 55.15    | 63.925   | 8.775   | 0.862729761 | 0.6647   | 1.178  |
| 160255_at   | 2910.8 | 3316.5 | 2693.9 | 3117.1 | 3390.4 | 2994.7 | 3773.8 | 3246.4 | 0.157984917 | 3009.575 | 3351.325 | 341.75  | 0.898025408 | 0.1546   | 1.113  |
| 160256_at   | 2926.5 | 4788.4 | 3099   | 3151.9 | 4542.6 | 2942.2 | 3352   | 3312.5 | 0.93714159  | 3491.45  | 3537.325 | 45.875  | 0.987031161 | 0.8947   | 1.02   |
| 160257_at   | 3392.3 | 3559.9 | 4442.3 | 5090.7 | 3541.8 | 3637.4 | 4425.2 | 3768.1 | 0.561957669 | 4121.3   | 3843.125 | 278.175 | 1.072382501 | 0.597    | -1.062 |
| 160258_at   | 727.6  | 972.6  | 648.7  | 506.8  | 927.7  | 665.8  | 549.2  | 605.7  | 0.841738598 | 713.925  | 687.1    | 26.825  | 1.039040897 | 0.8663   | 1.032  |
| 160259_at   | 7.8    | 10.2   | 23     | 7.7    | 11.2   | 12.5   | 8.6    | 38.7   | 0.516303845 | 12.175   | 17.75    | 5.575   | 0.685915493 | 0.5012   | 1.351  |
| 160260_at   | 221.9  | 247.3  | 246.4  | 253.6  | 245.2  | 368.1  | 267.2  | 214.8  | 0.416359868 | 242.3    | 273.825  | 31.525  | 0.884871725 | 0.417    | 1.109  |
| 160261_i_at | 1201.4 | 1264   | 1883.6 | 2098.3 | 1227.2 | 947    | 1443.1 | 1660.4 | 0.326656166 | 1611.825 | 1319.425 | 292.4   | 1.221611687 | 0.3392   | -1.212 |
| 160262_at   | 2776.3 | 2596.4 | 2874.6 | 2790.6 | 3668.4 | 3728.7 | 2742.6 | 2929.8 | 0.135601934 | 2759.475 | 3267.375 | 507.9   | 0.844554115 | 0.09454  | 1.174  |
| 160263_r_at | 179.4  | 183.5  | 192    | 232.4  | 198.5  | 194.4  | 259.6  | 205.1  | 0.40329205  | 196.825  | 214.4    | 17.575  | 0.918027052 | 0.3835   | 1.087  |



|             |        |        |        |        |        |        |        |        |             |          |          |         |             |          |        |
|-------------|--------|--------|--------|--------|--------|--------|--------|--------|-------------|----------|----------|---------|-------------|----------|--------|
| 160264_s_at | 452    | 635.7  | 289.4  | 400.7  | 516.3  | 593.3  | 371.1  | 314.7  | 0.965178087 | 444.45   | 448.85   | 4.4     | 0.990197171 | 0.938    | 1.018  |
| 160265_at   | 755.1  | 714.9  | 1231.2 | 1305.8 | 1177.1 | 842.5  | 1198.4 | 1085.9 | 0.69099558  | 1001.75  | 1075.975 | 74.225  | 0.931016055 | 0.5976   | 1.104  |
| 160266_r_at | 952.3  | 1731.2 | 1836.8 | 1951.6 | 1925.7 | 1654   | 1791.3 | 1933.3 | 0.433878577 | 1617.975 | 1826.075 | 208.1   | 0.88603973  | 0.3946   | 1.169  |
| 160267_at   | 375.8  | 444.2  | 497.9  | 584.4  | 522.9  | 553.5  | 504    | 570.8  | 0.25766167  | 475.575  | 537.8    | 62.225  | 0.884297136 | 0.2152   | 1.144  |
| 160268_at   | 1112.9 | 1286.4 | 1194.9 | 1280.8 | 1195.2 | 1039.2 | 1358.9 | 1421.1 | 0.731572693 | 1218.75  | 1253.6   | 34.85   | 0.972200064 | 0.7825   | 1.023  |
| 160269_at   | 950.6  | 865.6  | 773.5  | 787.9  | 839.6  | 882.3  | 728.5  | 792.1  | 0.544418461 | 844.4    | 810.625  | 33.775  | 1.041665382 | 0.5487   | -1.041 |
| 160270_at   | 1724.8 | 1620.7 | 1939.7 | 1744.7 | 1659.4 | 1804.5 | 2223.7 | 1855.5 | 0.395585511 | 1757.475 | 1885.775 | 128.3   | 0.931964312 | 0.3902   | 1.069  |
| 160271_at   | 1835   | 2231.6 | 1706.9 | 1412.7 | 2338.3 | 1978   | 1533.3 | 1743.1 | 0.689284995 | 1796.55  | 1898.175 | 101.625 | 0.946461733 | 0.6821   | 1.058  |
| 160272_at   | 1146.7 | 1554.1 | 1360.2 | 1714.3 | 2120.9 | 1404.7 | 1652.3 | 2016.4 | 0.139733117 | 1443.825 | 1798.575 | 354.75  | 0.802760519 | 0.1418   | 1.243  |
| 160273_at   | 966.9  | 910.4  | 1490.4 | 1566.1 | 862.1  | 719.7  | 1156.2 | 1110.5 | 0.233920159 | 1233.45  | 962.125  | 271.325 | 1.282005976 | 0.2369   | -1.267 |
| 160274_at   | 14.5   | 30.5   | 38.7   | 10.9   | 9.1    | 16.2   | 18.3   | 11.5   | 0.233524618 | 23.65    | 13.775   | 9.875   | 1.716878403 | 0.2358   | -1.564 |
| 160275_at   | 936.6  | 1011.1 | 1017.3 | 645.4  | 1158.7 | 1144.9 | 834.7  | 803.7  | 0.548025559 | 902.6    | 985.5    | 82.9    | 0.915880264 | 0.5626   | 1.094  |
| 160276_at   | 16.1   | 17.6   | 8.7    | 14.1   | 13     | 40.8   | 11.2   | 26.2   | 0.300296203 | 14.125   | 22.8     | 8.675   | 0.619517544 | 0.3126   | 1.457  |
| 160277_at   | 1764.8 | 1861.2 | 2059   | 1663.9 | 1788.9 | 1755.6 | 2013.8 | 1705.8 | 0.851512735 | 1837.225 | 1816.025 | 21.2    | 1.011673848 | 0.8619   | 1.011  |
| 160278_at   | 1014.7 | 1236.5 | 748.8  | 673.8  | 918.2  | 807.6  | 512.9  | 565.4  | 0.229368785 | 918.45   | 701.025  | 217.425 | 1.31015299  | 0.2197   | -1.31  |
| 160279_at   | 1935.9 | 2293.8 | 2358.5 | 2135.2 | 2629.7 | 2144.4 | 2020.5 | 2028.2 | 0.890703885 | 2180.85  | 2205.7   | 24.85   | 0.988733735 | 0.9177   | 1.008  |
| 160280_at   | 1161.7 | 1490.4 | 1523.1 | 1356   | 1282.6 | 1230.7 | 1927.3 | 1287.5 | 0.802026072 | 1382.8   | 1432.025 | 49.225  | 0.9656256   | 0.8583   | 1.023  |
| 160281_at   | 1089.9 | 1219.8 | 1386.7 | 1628.6 | 1225.1 | 998.9  | 1469   | 1315.8 | 0.622662981 | 1331.25  | 1252.2   | 79.05   | 1.063128893 | 0.6331   | -1.061 |
| 160282_at   | 1041.6 | 939.9  | 956    | 968.6  | 732.1  | 906.3  | 669.8  | 924.2  | 0.070372296 | 976.525  | 808.1    | 168.425 | 1.208420988 | 0.05367  | -1.219 |
| 160283_at   | 2625.5 | 2953.7 | 2326.7 | 1868.6 | 2993.7 | 2683.6 | 2037.3 | 2015.3 | 0.974522578 | 2443.625 | 2432.475 | 11.15   | 1.004583809 | 0.9699   | 1.006  |
| 160284_at   | 255.1  | 211.8  | 178.4  | 240.6  | 218.9  | 256    | 220.7  | 206.7  | 0.845529597 | 221.475  | 225.575  | 4.1     | 0.981824227 | 0.7977   | 1.025  |
| 160285_at   | 437.1  | 502.2  | 510.6  | 546    | 632.1  | 498    | 492.9  | 534.3  | 0.350185903 | 498.975  | 539.325  | 40.35   | 0.925184258 | 0.3448   | 1.079  |
| 160286_at   | 1291   | 1810.8 | 2398.5 | 2976.1 | 1863.7 | 1389.8 | 2408.2 | 2435   | 0.837746924 | 2119.1   | 2024.175 | 94.925  | 1.046895649 | 0.9197   | -1.024 |
| 160287_at   | 1881   | 2204.5 | 1563.4 | 1453   | 1898.2 | 1749   | 1609.5 | 1584.5 | 0.741021545 | 1775.475 | 1710.3   | 65.175  | 1.03810735  | 0.8038   | 1.027  |
| 160288_at   | 2704.7 | 2744.2 | 2091.7 | 1940.2 | 2782.3 | 2781.8 | 2399.3 | 2234.3 | 0.502577553 | 2370.2   | 2549.425 | 179.225 | 0.929699834 | 0.4714   | 1.083  |
| 160289_s_at | 723.6  | 649.4  | 899.7  | 876.3  | 494.6  | 792    | 940.7  | 861.8  | 0.901095527 | 787.25   | 772.275  | 14.975  | 1.019390761 | 0.8216   | -1.039 |
| 160290_at   | 666.8  | 504.3  | 658.6  | 585.5  | 581.2  | 468.9  | 694.6  | 669    | 0.995496178 | 603.8    | 603.425  | 0.375   | 1.000621453 | 0.9592   | 1.006  |
| 160291_at   | 1787.9 | 2375.8 | 2168.8 | 2296.1 | 2863.4 | 1822.9 | 2350.1 | 2718.2 | 0.341064723 | 2157.15  | 2438.65  | 281.5   | 0.884567281 | 0.3775   | 1.12   |
| 160292_at   | 194.3  | 313.9  | 198.4  | 112.3  | 305.6  | 328.1  | 176.6  | 164.4  | 0.5364104   | 204.725  | 243.675  | 38.95   | 0.840155945 | 0.5174   | 1.21   |
| 160293_at   | 2520   | 2212.1 | 2194.4 | 2143.9 | 2570.9 | 2304.2 | 2329.4 | 2274.1 | 0.387636926 | 2267.6   | 2369.65  | 102.05  | 0.956934568 | 0.3668   | 1.046  |
| 160294_at   | 551.4  | 452.7  | 527.4  | 482    | 507.5  | 505.4  | 380.8  | 499.1  | 0.46035189  | 503.375  | 473.2    | 30.175  | 1.063767963 | 0.458    | -1.068 |
| 160295_at   | 923.4  | 1124.8 | 995.2  | 777.7  | 1148   | 858.1  | 752.6  | 820.5  | 0.613360884 | 955.275  | 894.8    | 60.475  | 1.067584935 | 0.5816   | -1.072 |
| 160296_at   | 1052.6 | 849.7  | 1620.5 | 1406.5 | 906    | 970.6  | 1339.2 | 1310.1 | 0.645305242 | 1232.325 | 1131.475 | 100.85  | 1.089131443 | 0.7066   | -1.072 |
| 160297_at   | 458.1  | 511.3  | 447.4  | 439    | 583.6  | 441.4  | 406.5  | 447.6  | 0.897006515 | 463.95   | 469.775  | 5.825   | 0.987600447 | 0.9581   | 1.005  |
| 160298_at   | 251.1  | 356.3  | 252    | 291.8  | 385.9  | 282.9  | 342.3  | 333.1  | 0.189648837 | 287.8    | 336.05   | 48.25   | 0.856420176 | 0.1771   | 1.173  |
| 160299_at   | 1215.4 | 1643.2 | 1135.3 | 1040   | 1209.3 | 1354.4 | 1120.4 | 988.8  | 0.583693775 | 1258.475 | 1168.225 | 90.25   | 1.077253954 | 0.6028   | -1.068 |
| 160300_at   | 513.7  | 615.9  | 402.4  | 811.7  | 472    | 795    | 395.9  | 623.4  | 0.911560779 | 585.925  | 571.575  | 14.35   | 1.025106067 | 0.9018   | -1.028 |
| 160301_at   | 696.2  | 700.7  | 752.6  | 754.2  | 606.9  | 719.6  | 855.6  | 721.7  | 0.999650606 | 725.925  | 725.95   | 0.025   | 0.999965562 | 0.9305   | 1.007  |
| 160302_at   | 843    | 862    | 1021.6 | 653.6  | 918.9  | 768.3  | 728.3  | 555.5  | 0.372159883 | 845.05   | 742.75   | 102.3   | 1.137731404 | 0.3774   | -1.142 |
| 160303_at   | 484.9  | 452.2  | 478.6  | 447.9  | 643.3  | 708.2  | 617.3  | 582.2  | 0.004621565 | 465.9    | 637.75   | 171.85  | 0.730537044 | 0.000489 | 1.366  |
| 160304_r_at | 139.4  | 67.2   | 151.2  | 165.5  | 134.1  | 279    | 90.6   | 165.6  | 0.464657262 | 130.825  | 167.325  | 36.5    | 0.781861646 | 0.5104   | 1.244  |
| 160305_at   | 719.2  | 902    | 968.6  | 947.3  | 916.4  | 679.2  | 806.2  | 848.7  | 0.380338599 | 884.275  | 812.625  | 71.65   | 1.088171051 | 0.4041   | -1.087 |
| 160306_at   | 73.1   | 61.7   | 41.4   | 37.4   | 77.5   | 128.1  | 57.5   | 86.6   | 0.106088386 | 53.4     | 87.425   | 34.025  | 0.610809265 | 0.07729  | 1.631  |
| 160307_at   | 375.9  | 290.7  | 395.3  | 478.3  | 339.7  | 300.9  | 350.4  | 295.8  | 0.200714316 | 385.05   | 321.7    | 63.35   | 1.196922599 | 0.1835   | -1.182 |
| 160308_at   | 1015.3 | 969.8  | 1325.6 | 1106.7 | 1263.7 | 928.3  | 1488.8 | 1196   | 0.446929217 | 1104.35  | 1219.2   | 114.85  | 0.905798885 | 0.4708   | 1.097  |
| 160309_at   | 1195.6 | 1588.2 | 1614.5 | 1874.9 | 1474.5 | 887.9  | 1428.1 | 1770.2 | 0.471998503 | 1568.3   | 1390.175 | 178.125 | 1.12813135  | 0.4594   | -1.148 |
| 160310_at   | 931.9  | 961.9  | 925.4  | 803.8  | 982.5  | 940.6  | 1194.7 | 1040.1 | 0.096773971 | 905.75   | 1039.475 | 133.725 | 0.871353327 | 0.08367  | 1.146  |
| 160311_at   | 831.2  | 750.7  | 889.9  | 1017.2 | 846.1  | 807.1  | 1007.1 | 830.4  | 0.995505309 | 872.25   | 872.675  | 0.425   | 0.999512992 | 0.9741   | 1.003  |
| 160312_at   | 235.2  | 229.1  | 325.5  | 261.5  | 204.4  | 294.8  | 322.3  | 255.4  | 0.856121125 | 262.825  | 269.225  | 6.4     | 0.976228062 | 0.8837   | 1.02   |
| 160313_at   | 681.6  | 968.3  | 1212.5 | 1537.5 | 979.2  | 880.5  | 1338.2 | 1565   | 0.720123777 | 1099.975 | 1190.725 | 90.75   | 0.923785929 | 0.6766   | 1.101  |
| 160314_at   | 1798.4 | 1873   | 1597.7 | 1507.7 | 2005.5 | 1656.4 | 1593.8 | 1561.3 | 0.942346239 | 1694.2   | 1704.25  | 10.05   | 0.994102978 | 0.9533   | 1.005  |
| 160315_at   | 22.2   | 12.5   | 28.6   | 21.6   | 17.6   | 29.8   | 29.6   | 22.5   | 0.443022747 | 21.225   | 24.875   | 3.65    | 0.853266332 | 0.4442   | 1.193  |
| 160316_at   | 449.9  | 430.2  | 390.2  | 682    | 620.4  | 502.5  | 577.9  | 579.6  | 0.310704975 | 488.075  | 570.1    | 82.025  | 0.856121733 | 0.2259   | 1.193  |
| 160317_at   | 1681.3 | 1852.1 | 1671.3 | 1111.9 | 1586.5 | 1492.7 | 1400.9 | 1590.2 | 0.734249774 | 1579.15  | 1517.575 | 61.575  | 1.040574601 | 0.8503   | 1.023  |
| 160318_at   | 1523.6 | 1432.7 | 1319.3 | 1417.9 | 1218.3 | 1237.2 | 1292.5 | 1396.9 | 0.055846796 | 1423.375 | 1286.225 | 137.15  | 1.106629866 | 0.05438  | -1.107 |
| 160319_at   | 1901.1 | 2067.3 | 1755.8 | 2201.6 | 2321.4 | 2060.6 | 2708.1 | 2674.1 | 0.052347897 | 1981.45  | 2441.05  | 459.6   | 0.811720366 | 0.04445  | 1.229  |



|             |        |        |        |        |        |        |        |        |             |          |          |         |             |         |        |
|-------------|--------|--------|--------|--------|--------|--------|--------|--------|-------------|----------|----------|---------|-------------|---------|--------|
| 160320_at   | 235.8  | 259.4  | 287.8  | 249.4  | 189    | 224.7  | 265.1  | 286.5  | 0.524019253 | 258.1    | 241.325  | 16.775  | 1.069512069 | 0.4772  | -1.08  |
| 160321_at   | 1189.8 | 1141   | 1524.5 | 1793   | 1436.4 | 1132.8 | 1429.1 | 1607.2 | 0.95532189  | 1412.075 | 1401.375 | 10.7    | 1.007635358 | 0.9897  | 1.002  |
| 160322_at   | 1024.7 | 1406.1 | 1461   | 1312.5 | 1563.8 | 1433.6 | 1476.7 | 1429.6 | 0.169191336 | 1301.075 | 1475.925 | 174.85  | 0.881531921 | 0.1536  | 1.144  |
| 160323_at   | 804.5  | 868.9  | 833.1  | 580.5  | 946.4  | 865.9  | 752.9  | 769.3  | 0.467838209 | 771.75   | 833.625  | 61.875  | 0.925775978 | 0.4564  | 1.089  |
| 160324_at   | 909.9  | 1080.6 | 940.8  | 1088   | 1142.9 | 947.9  | 1153.5 | 1152.6 | 0.217932879 | 1004.825 | 1099.225 | 94.4    | 0.914121313 | 0.2289  | 1.094  |
| 160325_r_at | 133.5  | 51.6   | 135.6  | 129.4  | 50.6   | 63     | 106.4  | 111.1  | 0.289618988 | 112.525  | 82.775   | 29.75   | 1.359408034 | 0.3773  | -1.339 |
| 160326_at   | 971.3  | 974    | 1071.8 | 1377.3 | 1028.8 | 810.4  | 1116.7 | 1140.6 | 0.564485663 | 1098.6   | 1024.125 | 74.475  | 1.072720615 | 0.5684  | -1.071 |
| 160327_at   | 1079.3 | 1185.7 | 1126.3 | 1144.1 | 1286.9 | 1087   | 1236.6 | 1305.2 | 0.151556683 | 1133.85  | 1228.925 | 95.075  | 0.922635637 | 0.1385  | 1.082  |
| 160328_at   | 337.5  | 348.3  | 408.1  | 457.6  | 542.1  | 328.8  | 487.4  | 642.6  | 0.189083174 | 387.875  | 500.225  | 112.35  | 0.77540107  | 0.1926  | 1.263  |
| 160329_at   | 163.2  | 128.1  | 243.9  | 237.2  | 172.3  | 182.2  | 189.7  | 251.3  | 0.869797549 | 193.1    | 198.875  | 5.775   | 0.970961659 | 0.7727  | 1.055  |
| 160330_at   | 981.9  | 904.6  | 1145.5 | 1106.1 | 929.4  | 910.6  | 1366.8 | 1080.1 | 0.768732693 | 1034.525 | 1071.725 | 37.2    | 0.965289603 | 0.8175  | 1.026  |
| 160331_at   | 31.2   | 30.8   | 27.6   | 28.5   | 28.4   | 36.2   | 32.8   | 49.6   | 0.212260506 | 29.525   | 36.75    | 7.225   | 0.803401361 | 0.1555  | 1.219  |
| 160332_at   | 76.3   | 51     | 95.6   | 90     | 46.4   | 108.2  | 91.9   | 49.2   | 0.82405938  | 78.225   | 73.925   | 4.3     | 1.058167061 | 0.72    | -1.102 |
| 160333_at   | 3362.1 | 3198.8 | 3398.6 | 2688.8 | 3393.4 | 2947   | 2825.3 | 2738.9 | 0.428795056 | 3162.075 | 2976.15  | 185.925 | 1.06247165  | 0.4381  | -1.062 |
| 160334_at   | 17.5   | 14.6   | 35.9   | 51.8   | 20.6   | 10.7   | 37.6   | 27.8   | 0.600929281 | 29.95    | 24.175   | 5.775   | 1.238883144 | 0.6647  | -1.2   |
| 160335_at   | 239    | 322.3  | 368.8  | 306.3  | 276    | 307.8  | 277    | 329.3  | 0.716156723 | 309.1    | 297.525  | 11.575  | 1.038904294 | 0.7826  | -1.029 |
| 160336_at   | 108.1  | 91.6   | 124.9  | 187.7  | 101.1  | 162.1  | 141.5  | 90     | 0.876023435 | 128.075  | 123.675  | 4.4     | 1.035577117 | 0.9017  | 1.027  |
| 160337_at   | 2857.8 | 2040.3 | 2386.6 | 2707.4 | 2218.8 | 2256.4 | 1987.2 | 2084.9 | 0.138704937 | 2498.025 | 2136.825 | 361.2   | 1.169035836 | 0.113   | -1.161 |
| 160338_at   | 1098.1 | 1040.7 | 1464.5 | 1299.3 | 998.9  | 1053.4 | 1000.1 | 1150   | 0.16939034  | 1225.65  | 1050.6   | 175.05  | 1.166619075 | 0.1357  | -1.158 |
| 160339_at   | 415    | 312.3  | 343.7  | 304.2  | 202.4  | 310.8  | 319.7  | 369.7  | 0.361440523 | 343.8    | 300.65   | 43.15   | 1.143522368 | 0.3484  | -1.162 |
| 160340_at   | 76     | 58.9   | 43.4   | 23.5   | 29.9   | 59.8   | 37.2   | 31.6   | 0.447581428 | 50.45    | 39.625   | 10.825  | 1.27318612  | 0.5401  | -1.214 |
| 160341_at   | 1693.1 | 1983.3 | 1652.3 | 1342.9 | 1873.5 | 1702.2 | 1254.7 | 1515.1 | 0.677146468 | 1667.9   | 1586.375 | 81.525  | 1.051390749 | 0.6766  | -1.053 |
| 160342_r_at | 5.8    | 3      | 1.7    | 2.1    | 2.5    | 3.3    | 2.5    | 3      | 0.75184685  | 3.15     | 2.825    | 0.325   | 1.115044248 | 0.998   | 1.001  |
| 160343_at   | 460.3  | 449.5  | 489.4  | 451.5  | 602    | 468    | 546.3  | 413.5  | 0.364873625 | 462.675  | 507.45   | 44.775  | 0.911764706 | 0.3696  | 1.086  |
| 160344_at   | 2672.5 | 2718.9 | 2219.7 | 2277.1 | 2888   | 2803.4 | 2541.4 | 2388.1 | 0.33349116  | 2472.05  | 2655.225 | 183.175 | 0.931013379 | 0.3298  | 1.075  |
| 160345_at   | 1097.7 | 1220.8 | 844    | 677    | 1005.1 | 892.2  | 627.4  | 772.8  | 0.397357905 | 959.875  | 824.375  | 135.5   | 1.164366945 | 0.4295  | -1.152 |
| 160346_at   | 391.1  | 355.3  | 318.6  | 390.9  | 294.6  | 380.9  | 382.1  | 397.8  | 0.996724307 | 363.975  | 363.85   | 0.125   | 1.000343548 | 0.9673  | 1.004  |
| 160347_at   | 1071.5 | 1142.8 | 874.2  | 996.6  | 959.2  | 979.5  | 862.4  | 779.6  | 0.140157062 | 1021.275 | 895.175  | 126.1   | 1.140866311 | 0.1437  | -1.14  |
| 160348_at   | 1111.3 | 842.6  | 786.8  | 726.9  | 845.3  | 816.3  | 671.1  | 781.1  | 0.393404692 | 866.9    | 778.45   | 88.45   | 1.113623226 | 0.3877  | -1.103 |
| 160349_at   | 445.4  | 468.7  | 413    | 356.4  | 486.8  | 491.8  | 448.6  | 438.6  | 0.165974847 | 420.875  | 466.45   | 45.575  | 0.902293922 | 0.1578  | 1.113  |
| 160350_at   | 1117.2 | 1301.3 | 833.4  | 672.6  | 1203   | 1251.6 | 954.7  | 1048.6 | 0.439027696 | 981.125  | 1114.475 | 133.35  | 0.880347249 | 0.3746  | 1.166  |
| 160351_at   | 227.2  | 246.2  | 227.8  | 196.7  | 241.3  | 190.1  | 158.3  | 218.1  | 0.32732214  | 224.475  | 201.95   | 22.525  | 1.111537509 | 0.3066  | -1.121 |
| 160352_at   | 351.8  | 288.4  | 363.4  | 268.2  | 300    | 427.5  | 277.2  | 313.6  | 0.786619569 | 317.95   | 329.575  | 11.625  | 0.9647273   | 0.8117  | 1.03   |
| 160353_i_at | 180.1  | 148    | 402.3  | 287    | 81.1   | 221.5  | 283.9  | 235    | 0.5245662   | 254.35   | 205.375  | 48.975  | 1.23846622  | 0.5381  | -1.266 |
| 160354_at   | 15.5   | 13.8   | 21.5   | 28.1   | 18.6   | 15.5   | 21.9   | 19.3   | 0.809892296 | 19.725   | 18.825   | 0.9     | 1.047808765 | 0.933   | 1.015  |
| 160355_at   | 270.1  | 339.3  | 496.8  | 322.2  | 359.7  | 431.5  | 289.8  | 256.1  | 0.727908662 | 357.1    | 334.275  | 22.825  | 1.068282103 | 0.7384  | -1.062 |
| 160356_at   | 1596.9 | 1537.2 | 1729   | 1668.8 | 1595.8 | 1618.4 | 1981.7 | 1823.5 | 0.288717936 | 1632.975 | 1754.85  | 121.875 | 0.93054962  | 0.2758  | 1.071  |
| 160357_at   | 144.1  | 147.9  | 136.9  | 169    | 142.6  | 160.1  | 137.9  | 120.2  | 0.4209088   | 149.475  | 140.2    | 9.275   | 1.066155492 | 0.4062  | -1.069 |
| 160358_at   | 1052.9 | 1435.2 | 1527.7 | 1143.6 | 1684.4 | 1824.9 | 1896.2 | 1521.4 | 0.022621276 | 1289.85  | 1731.725 | 441.875 | 0.744835352 | 0.0245  | 1.354  |
| 160359_at   | 910    | 895.4  | 604.8  | 679    | 1011.9 | 636.2  | 749.2  | 708.2  | 0.972239885 | 772.3    | 776.375  | 4.075   | 0.994751248 | 0.9724  | 1.005  |
| 160360_at   | 6703.7 | 7559.5 | 6329   | 6213.4 | 7288.7 | 6200.5 | 7035.3 | 6524.5 | 0.881729659 | 6701.4   | 6762.25  | 60.85   | 0.991001516 | 0.8669  | 1.01   |
| 160361_at   | 880.3  | 904.7  | 918    | 931.2  | 1046   | 829.3  | 934.7  | 965    | 0.495308071 | 908.55   | 943.75   | 35.2    | 0.962701987 | 0.51    | 1.035  |
| 160362_at   | 2156   | 1660.8 | 1815.4 | 1891.2 | 1637   | 1780.1 | 1784.4 | 1869.7 | 0.375145373 | 1880.85  | 1767.8   | 113.05  | 1.063949542 | 0.3725  | -1.06  |
| 160363_at   | 900.5  | 978.8  | 1407.1 | 1045.6 | 735.9  | 1029.1 | 893.8  | 1060.8 | 0.304109564 | 1083     | 929.9    | 153.1   | 1.164641359 | 0.2923  | -1.159 |
| 160364_at   | 3918.3 | 3645.4 | 4069   | 4855.6 | 4091.9 | 3503.8 | 5037.8 | 4681.7 | 0.645467784 | 4122.075 | 4328.8   | 206.725 | 0.952244271 | 0.6687  | 1.046  |
| 160365_at   | 327.7  | 350.2  | 375.4  | 282.6  | 417.8  | 319    | 350.1  | 355.8  | 0.386143991 | 333.975  | 360.675  | 26.7    | 0.925972136 | 0.384   | 1.081  |
| 160366_at   | 1276.3 | 1325.2 | 1257.1 | 1140.4 | 1376   | 1346   | 1321.1 | 1232   | 0.21884657  | 1249.75  | 1318.775 | 69.025  | 0.94765976  | 0.2217  | 1.056  |
| 160367_at   | 260.7  | 285.2  | 304.5  | 296.4  | 205.9  | 201.9  | 279.9  | 315.4  | 0.296944305 | 286.7    | 250.775  | 35.925  | 1.143255907 | 0.2429  | -1.163 |
| 160368_at   | 66.3   | 96.2   | 44.7   | 77.5   | 71.2   | 52.2   | 83.8   | 34.4   | 0.506898714 | 71.175   | 60.4     | 10.775  | 1.17839404  | 0.5035  | -1.198 |
| 160369_at   | 86.4   | 108.6  | 96.4   | 102.3  | 83.3   | 100    | 73.2   | 80.6   | 0.104803999 | 98.425   | 84.275   | 14.15   | 1.167902699 | 0.09963 | -1.172 |
| 160370_at   | 125.5  | 139.2  | 111.1  | 159.1  | 179.4  | 212.8  | 183.5  | 165.5  | 0.011150666 | 133.725  | 185.3    | 51.575  | 0.721667566 | 0.01172 | 1.392  |
| 160371_at   | 2980.1 | 2744.8 | 2911.4 | 2379.4 | 2573.3 | 2864.2 | 2571.1 | 2649.5 | 0.582299264 | 2753.925 | 2664.525 | 89.4    | 1.033551946 | 0.6119  | -1.031 |
| 160372_at   | 368    | 237.3  | 314    | 316.3  | 297.2  | 274.6  | 281.3  | 345.2  | 0.777948061 | 308.9    | 299.575  | 9.325   | 1.031127431 | 0.838   | -1.023 |
| 160373_i_at | 421.2  | 388.4  | 399.8  | 348.2  | 464.1  | 426.4  | 543.9  | 319    | 0.380974613 | 389.4    | 438.35   | 48.95   | 0.888331242 | 0.4213  | 1.108  |
| 160374_r_at | 35.4   | 44.1   | 61.7   | 63.5   | 75.9   | 52.4   | 44     | 43.9   | 0.787382204 | 51.175   | 54.05    | 2.875   | 0.946808511 | 0.7723  | 1.059  |
| 160375_at   | 39.8   | 9.2    | 15.3   | 9.2    | 7.3    | 11.7   | 40.6   | 6.4    | 0.869215834 | 18.375   | 16.5     | 1.875   | 1.113636364 | 0.7124  | -1.234 |



|             |         |         |        |        |        |        |        |        |             |          |          |         |             |         |        |
|-------------|---------|---------|--------|--------|--------|--------|--------|--------|-------------|----------|----------|---------|-------------|---------|--------|
| 160376_at   | 418     | 440     | 543    | 493.2  | 464    | 418.7  | 353.3  | 458.1  | 0.235063367 | 473.55   | 423.525  | 50.025  | 1.118115814 | 0.2394  | -1.119 |
| 160377_at   | 1090.2  | 1061    | 1401.8 | 1391.3 | 1396   | 1244.4 | 1334.8 | 1312.7 | 0.434306773 | 1236.075 | 1321.975 | 85.9    | 0.935021464 | 0.3812  | 1.078  |
| 160378_at   | 1127.9  | 1300.3  | 1133.8 | 890.3  | 1252.4 | 1447.9 | 923.7  | 1076.1 | 0.67708736  | 1113.075 | 1175.025 | 61.95   | 0.947277717 | 0.7069  | 1.05   |
| 160379_at   | 172.8   | 213.7   | 159.3  | 179.3  | 179.4  | 162.3  | 186.1  | 203.6  | 0.916723374 | 181.275  | 182.85   | 1.575   | 0.991386382 | 0.8896  | 1.011  |
| 160380_at   | 1255.6  | 1200.9  | 1271.7 | 1424.8 | 1290.2 | 1357.1 | 1441.5 | 1432.8 | 0.177800192 | 1288.25  | 1380.4   | 92.15   | 0.933243987 | 0.1685  | 1.073  |
| 160381_at   | 291.8   | 268.1   | 329.6  | 331.6  | 339.2  | 322.9  | 347.1  | 370.6  | 0.081344803 | 305.275  | 344.95   | 39.675  | 0.884983331 | 0.078   | 1.133  |
| 160382_at   | 290.7   | 236.7   | 364.2  | 371.6  | 256.2  | 318.8  | 370.3  | 396.5  | 0.674789742 | 315.8    | 335.45   | 19.65   | 0.94142197  | 0.6754  | 1.065  |
| 160383_at   | 3368.9  | 4002    | 3194.5 | 2957.9 | 4252   | 3839.5 | 2813.7 | 2996.4 | 0.825804466 | 3380.825 | 3475.4   | 94.575  | 0.972787305 | 0.8748  | 1.02   |
| 160384_at   | 5346.3  | 5380.8  | 4950.6 | 5267.8 | 5508.8 | 4874.4 | 5042.4 | 5512.7 | 0.992826544 | 5236.375 | 5234.575 | 1.8     | 1.000343867 | 0.9732  | 1.001  |
| 160385_at   | 1331.4  | 1501    | 1553.7 | 1420.4 | 1711.6 | 1514.8 | 1734.7 | 1789.8 | 0.023418555 | 1451.625 | 1687.725 | 236.1   | 0.860107541 | 0.02335 | 1.162  |
| 160386_at   | 647.1   | 680.4   | 834.9  | 722.6  | 535.8  | 719.2  | 751.2  | 851.2  | 0.932501022 | 721.25   | 714.35   | 6.9     | 1.009659131 | 0.8729  | 1.019  |
| 160387_at   | 305.9   | 572.2   | 404.9  | 369.6  | 562.5  | 406.7  | 456    | 426    | 0.489818317 | 413.15   | 462.8    | 49.65   | 0.892718237 | 0.4107  | 1.141  |
| 160388_at   | 582.5   | 575.3   | 696.6  | 617.1  | 868.9  | 610.8  | 736.4  | 818.3  | 0.082749193 | 617.875  | 758.6    | 140.725 | 0.814493804 | 0.06589 | 1.221  |
| 160389_r_at | 9.6     | 15.8    | 8.3    | 9.3    | 8      | 14.9   | 15.5   | 9.6    | 0.640128261 | 10.75    | 12       | 1.25    | 0.895833333 | 0.6532  | 1.108  |
| 160390_at   | 8.9     | 15.5    | 8.7    | 11     | 5.1    | 11.3   | 12.1   | 11.1   | 0.636185086 | 11.025   | 9.9      | 1.125   | 1.113636364 | 0.6061  | -1.141 |
| 160391_at   | 776.5   | 693.6   | 1018.1 | 1093.9 | 789.1  | 810.4  | 959.9  | 1072.4 | 0.918897733 | 895.525  | 907.95   | 12.425  | 0.986315326 | 0.8645  | 1.024  |
| 160392_at   | 224.4   | 187.1   | 285.2  | 201.5  | 262.6  | 244.4  | 207.8  | 200.1  | 0.879454422 | 224.55   | 228.725  | 4.175   | 0.981746639 | 0.8317  | 1.025  |
| 160393_at   | 199.7   | 199.2   | 307.7  | 422.8  | 294.5  | 271.6  | 411.8  | 454.2  | 0.318539878 | 282.35   | 358.025  | 75.675  | 0.788632079 | 0.2764  | 1.304  |
| 160394_at   | 577.9   | 614.8   | 807    | 711.3  | 800.8  | 575.8  | 712.1  | 638.9  | 0.955081549 | 677.75   | 681.9    | 4.15    | 0.993914064 | 0.9479  | 1.007  |
| 160395_at   | 1023.9  | 1208    | 1469.8 | 1595.8 | 1649.7 | 1246.6 | 1872.8 | 1943.2 | 0.133749572 | 1324.375 | 1678.075 | 353.7   | 0.78922277  | 0.1455  | 1.267  |
| 160396_at   | 286.2   | 314.7   | 271.8  | 277.2  | 282.9  | 190.8  | 251.8  | 337.1  | 0.53680971  | 287.475  | 265.65   | 21.825  | 1.082156973 | 0.4576  | -1.103 |
| 160397_at   | 797     | 985.2   | 998.8  | 955    | 1123.3 | 864.7  | 997.6  | 1044.6 | 0.344017311 | 934      | 1007.55  | 73.55   | 0.927001141 | 0.3606  | 1.078  |
| 160398_at   | 290.6   | 373.5   | 354.7  | 428.1  | 439    | 319.8  | 364.9  | 405.3  | 0.611500415 | 361.725  | 382.25   | 20.525  | 0.946304774 | 0.6041  | 1.059  |
| 160399_r_at | 178.7   | 327.8   | 359.3  | 469.1  | 383.6  | 366    | 398.3  | 428.4  | 0.39182615  | 333.725  | 394.075  | 60.35   | 0.846856563 | 0.3247  | 1.248  |
| 160400_at   | 691.6   | 563.3   | 682.1  | 715.9  | 816.2  | 929.4  | 673.2  | 650.6  | 0.222356988 | 663.225  | 767.35   | 104.125 | 0.864305728 | 0.2118  | 1.15   |
| 160401_r_at | 9.1     | 1.8     | 8.7    | 18.5   | 14.5   | 5      | 5.9    | 2.6    | 0.580017558 | 9.525    | 7        | 2.525   | 1.360714286 | 0.7433  | -1.23  |
| 160402_at   | 11441.2 | 11019.3 | 7671.4 | 6605.2 | 9162.3 | 7915.8 | 8363.9 | 7707.1 | 0.517769174 | 9184.275 | 8287.275 | 897     | 1.108238233 | 0.5987  | -1.081 |
| 160403_at   | 1601    | 1808.3  | 1636.6 | 1680.3 | 1867.3 | 1850.2 | 1744   | 1723.5 | 0.098106798 | 1681.55  | 1796.25  | 114.7   | 0.936144746 | 0.09368 | 1.069  |
| 160404_at   | 12.7    | 9.9     | 8.5    | 5      | 6.9    | 12.4   | 12.7   | 12.9   | 0.347431074 | 9.025    | 11.225   | 2.2     | 0.804008909 | 0.377   | 1.27   |
| 160405_at   | 39.2    | 45      | 33.9   | 30.4   | 25.9   | 60.3   | 38.8   | 44.5   | 0.537001043 | 37.125   | 42.375   | 5.25    | 0.876106195 | 0.6299  | 1.104  |
| 160406_at   | 307.6   | 230     | 255.3  | 228.6  | 271.6  | 337.5  | 288.3  | 316.4  | 0.089796796 | 255.375  | 303.45   | 48.075  | 0.841571923 | 0.08155 | 1.193  |
| 160407_at   | 37.6    | 23.8    | 30.5   | 29.1   | 31.9   | 64.5   | 25.5   | 51.3   | 0.244200225 | 30.25    | 43.3     | 13.05   | 0.698614319 | 0.2377  | 1.357  |
| 160408_at   | 21      | 6.8     | 3.7    | 4.8    | 12.2   | 7.3    | 4.7    | 15.6   | 0.859978305 | 9.075    | 9.95     | 0.875   | 0.912060302 | 0.6305  | 1.268  |
| 160409_at   | 234.4   | 167.2   | 213.6  | 277.2  | 166.8  | 260.7  | 194.6  | 213.4  | 0.65467749  | 223.1    | 208.875  | 14.225  | 1.068102932 | 0.6715  | -1.065 |
| 160410_at   | 330.1   | 370     | 348.2  | 340.9  | 402.9  | 353.8  | 327.4  | 383.8  | 0.344945419 | 347.3    | 366.975  | 19.675  | 0.946385994 | 0.3449  | 1.054  |
| 160411_at   | 30.2    | 34.7    | 15.5   | 36.5   | 31.9   | 38.5   | 23.6   | 41.5   | 0.482483696 | 29.225   | 33.875   | 4.65    | 0.862730627 | 0.4797  | 1.194  |
| 160412_at   | 192.3   | 229.8   | 264    | 252.8  | 217.7  | 184.7  | 212.8  | 253.8  | 0.442863536 | 234.725  | 217.25   | 17.475  | 1.080437284 | 0.4562  | -1.079 |
| 160413_at   | 7.9     | 10.1    | 9.4    | 10.6   | 8.6    | 12     | 11.7   | 7.1    | 0.804755909 | 9.5      | 9.85     | 0.35    | 0.964467005 | 0.9206  | 1.015  |
| 160414_at   | 828.9   | 910.7   | 1123.5 | 1203.5 | 864.7  | 868.3  | 977.6  | 996.6  | 0.397198576 | 1016.65  | 926.8    | 89.85   | 1.096946483 | 0.4157  | -1.087 |
| 160415_at   | 113.4   | 142.9   | 140.7  | 143.8  | 186.8  | 135    | 109    | 134.1  | 0.752725236 | 135.2    | 141.225  | 6.025   | 0.957337582 | 0.8226  | 1.03   |
| 160416_at   | 604.9   | 685.6   | 676    | 872    | 755    | 957.5  | 725.9  | 1007.3 | 0.148364759 | 709.625  | 861.425  | 151.8   | 0.823780364 | 0.1386  | 1.213  |
| 160417_at   | 864.8   | 1060.9  | 1513.7 | 1432.6 | 1401.4 | 1163.7 | 1349.6 | 1299.2 | 0.627762017 | 1218     | 1303.475 | 85.475  | 0.934425286 | 0.534   | 1.095  |
| 160418_at   | 95.8    | 42.6    | 46.8   | 50.5   | 28     | 73.9   | 60.8   | 23.8   | 0.507483264 | 58.925   | 46.625   | 12.3    | 1.263806971 | 0.4171  | -1.34  |
| 160419_r_at | 48.8    | 87.1    | 39.4   | 105.9  | 71.8   | 79.9   | 75.9   | 66.4   | 0.85339122  | 70.3     | 73.5     | 3.2     | 0.956462585 | 0.6263  | 1.129  |
| 160420_r_at | 996.4   | 873.7   | 851.9  | 1489.8 | 1512.7 | 706.7  | 886.4  | 753.4  | 0.725286011 | 1052.95  | 964.8    | 88.15   | 1.091366086 | 0.6309  | -1.115 |
| 160421_r_at | 531.4   | 528.6   | 488.9  | 465.7  | 516.5  | 681.7  | 560.8  | 492.2  | 0.261812101 | 503.65   | 562.8    | 59.15   | 0.894900498 | 0.2317  | 1.11   |
| 160422_at   | 1478.2  | 1401.6  | 1026   | 904.7  | 1197.3 | 1219.4 | 924.5  | 1026.6 | 0.515737046 | 1202.625 | 1091.95  | 110.675 | 1.101355373 | 0.5692  | -1.085 |
| 160423_at   | 300.5   | 313.2   | 386.6  | 446.2  | 347.7  | 364.6  | 402.2  | 397.6  | 0.676606677 | 361.625  | 378.025  | 16.4    | 0.956616626 | 0.596   | 1.057  |
| 160424_f_at | 2775.5  | 2526.2  | 2138.8 | 1790.3 | 2800.1 | 2855.9 | 2078.5 | 2393.5 | 0.459763517 | 2307.7   | 2532     | 224.3   | 0.911413902 | 0.4506  | 1.103  |
| 160425_at   | 252.6   | 328.2   | 394.2  | 392.1  | 435.9  | 288.7  | 410.5  | 442.1  | 0.325416476 | 341.775  | 394.3    | 52.525  | 0.866789247 | 0.3574  | 1.156  |
| 160426_at   | 1304.1  | 1288.9  | 1057.9 | 895    | 1279.9 | 1204.7 | 956.3  | 1055.1 | 0.922352378 | 1136.475 | 1124     | 12.475  | 1.011098754 | 0.9609  | 1.006  |
| 160427_at   | 1857    | 1716.3  | 1693.9 | 1531.2 | 1754.3 | 1699.2 | 1640.3 | 1568   | 0.679301238 | 1699.6   | 1665.45  | 34.15   | 1.020504969 | 0.6986  | 1.019  |
| 160428_at   | 1642.6  | 1561.5  | 1859.1 | 1430.2 | 1541.2 | 1439.7 | 1552.6 | 1482.1 | 0.280323235 | 1623.35  | 1503.9   | 119.45  | 1.079426824 | 0.2552  | -1.075 |
| 160429_at   | 1368.8  | 1106.7  | 1006.8 | 865.4  | 1077.4 | 1125.8 | 814    | 1006   | 0.548510224 | 1086.925 | 1005.8   | 81.125  | 1.080657188 | 0.5748  | -1.074 |
| 160430_at   | 6530.8  | 7385.1  | 6367.4 | 7785.2 | 6053.8 | 6537.5 | 8623.5 | 8067.4 | 0.683300009 | 7017.125 | 7320.55  | 303.425 | 0.958551612 | 0.7283  | 1.036  |
| 160431_at   | 808.8   | 881.7   | 658    | 600.7  | 739.6  | 678.9  | 681.3  | 665.8  | 0.538346137 | 737.3    | 691.4    | 45.9    | 1.066387041 | 0.5832  | -1.055 |



|             |         |         |        |        |         |         |        |        |             |          |          |         |             |          |        |
|-------------|---------|---------|--------|--------|---------|---------|--------|--------|-------------|----------|----------|---------|-------------|----------|--------|
| 160432_at   | 978     | 1064.2  | 771.8  | 810.7  | 834.6   | 822.4   | 672.3  | 756.6  | 0.151800171 | 906.175  | 771.475  | 134.7   | 1.174600603 | 0.137    | -1.169 |
| 160433_at   | 376.2   | 382.6   | 279.5  | 281.1  | 345     | 436.5   | 275.3  | 317.9  | 0.767038225 | 329.85   | 343.675  | 13.825  | 0.959773041 | 0.7787   | 1.039  |
| 160434_at   | 729.6   | 603.4   | 729.3  | 642.7  | 725.4   | 732.3   | 782.2  | 578.8  | 0.619991722 | 676.25   | 704.675  | 28.425  | 0.959662256 | 0.6533   | 1.039  |
| 160435_at   | 425.5   | 443.4   | 412.5  | 437.9  | 447.1   | 528.1   | 475.1  | 436.2  | 0.132208728 | 429.825  | 471.625  | 41.8    | 0.911370262 | 0.094    | 1.095  |
| 160436_at   | 30.1    | 35.7    | 29.8   | 13.6   | 18      | 42      | 45.7   | 43.6   | 0.263245679 | 27.3     | 37.325   | 10.025  | 0.731413262 | 0.3549   | 1.365  |
| 160437_at   | 113.8   | 164.5   | 108.4  | 116    | 191.5   | 143.1   | 130.6  | 132.3  | 0.267177628 | 125.675  | 149.375  | 23.7    | 0.841338912 | 0.2304   | 1.191  |
| 160438_at   | 44.7    | 44.8    | 11     | 12.9   | 15.2    | 76.8    | 36.8   | 46.3   | 0.372915659 | 28.35    | 43.775   | 15.425  | 0.647629926 | 0.3791   | 1.625  |
| 160439_at   | 44.4    | 40.4    | 61.1   | 113.8  | 70.6    | 11.4    | 61.1   | 56.8   | 0.512979526 | 64.925   | 49.975   | 14.95   | 1.299149575 | 0.4726   | -1.454 |
| 160440_at   | 1305.6  | 1681.9  | 1756.6 | 2067.5 | 1693.1  | 1273.9  | 1739.9 | 1798.6 | 0.711888889 | 1702.9   | 1626.375 | 76.525  | 1.047052494 | 0.7479   | -1.043 |
| 160441_at   | 39.3    | 9.3     | 24.3   | 36.1   | 13.9    | 40.7    | 25.7   | 23     | 0.876653862 | 27.25    | 25.825   | 1.425   | 1.05517909  | 0.9764   | 1.012  |
| 160442_at   | 592.7   | 562.1   | 458.9  | 491.6  | 528.7   | 488.8   | 343.5  | 516.2  | 0.324970237 | 526.325  | 469.3    | 57.025  | 1.121510761 | 0.3296   | -1.132 |
| 160443_at   | 4.1     | 3.8     | 1.4    | 2.4    | 1.8     | 4.9     | 1.9    | 3.5    | 0.921203897 | 2.925    | 3.025    | 0.1     | 0.966942149 | 0.9026   | 1.045  |
| 160444_at   | 821.2   | 1199.6  | 1141.1 | 979.3  | 1333.3  | 1075.1  | 918    | 936.1  | 0.821094425 | 1035.3   | 1065.625 | 30.325  | 0.971542522 | 0.8245   | 1.028  |
| 160445_at   | 864.2   | 762.3   | 1235   | 1138.5 | 841.6   | 1159.5  | 917.4  | 813.3  | 0.642618867 | 1000     | 932.95   | 67.05   | 1.071868803 | 0.6798   | -1.062 |
| 160446_at   | 38.9    | 53.7    | 34.7   | 38.7   | 55.8    | 52.7    | 10.6   | 49.7   | 0.954050616 | 41.5     | 42.2     | 0.7     | 0.983412322 | 0.732    | -1.159 |
| 160447_at   | 890.7   | 814.8   | 902.6  | 875.1  | 1153.5  | 761.4   | 919.3  | 1092.3 | 0.302050834 | 870.8    | 981.625  | 110.825 | 0.887100471 | 0.3072   | 1.114  |
| 160448_at   | 1250.5  | 1144.7  | 1022.3 | 915.7  | 946.4   | 1080.2  | 881.5  | 863    | 0.167513382 | 1083.3   | 942.775  | 140.525 | 1.149054652 | 0.1589   | -1.146 |
| 160449_at   | 672.9   | 566.2   | 552.4  | 651.7  | 574.4   | 684.6   | 583.9  | 654.6  | 0.748564138 | 610.8    | 624.375  | 13.575  | 0.978258258 | 0.7392   | 1.023  |
| 160450_at   | 1810.7  | 1854.6  | 1838.9 | 1496.2 | 2041.4  | 1558.6  | 1629.2 | 1547.5 | 0.713895187 | 1750.1   | 1694.175 | 55.925  | 1.033010167 | 0.6852   | -1.036 |
| 160451_at   | 1464.4  | 1250.8  | 1330.8 | 1278.7 | 909.7   | 988.5   | 975    | 962.3  | 0.00223385  | 1331.175 | 958.875  | 372.3   | 1.388267501 | 0.000165 | -1.386 |
| 160452_at   | 8.2     | 9.5     | 3.9    | 6.6    | 3.3     | 6.1     | 11     | 7.1    | 0.933253245 | 7.05     | 6.875    | 0.175   | 1.025454545 | 0.8695   | -1.056 |
| 160453_at   | 454.7   | 556     | 581.8  | 652.6  | 680.3   | 405.3   | 560.7  | 469.1  | 0.6720101   | 561.275  | 528.85   | 32.425  | 1.061312281 | 0.6224   | -1.073 |
| 160454_at   | 310.2   | 215.9   | 245.5  | 364.8  | 200.4   | 237.5   | 324.6  | 244.8  | 0.476536094 | 284.1    | 251.825  | 32.275  | 1.1281644   | 0.4823   | -1.122 |
| 160455_s_at | 6798.4  | 5419    | 4767.6 | 4157.8 | 4862.2  | 6070.9  | 4893.5 | 4460.8 | 0.760558634 | 5285.7   | 5071.85  | 213.85  | 1.042164102 | 0.8082   | -1.032 |
| 160456_at   | 75.9    | 88.8    | 78.3   | 99.1   | 91.4    | 104.2   | 170.6  | 117.6  | 0.132090023 | 85.525   | 120.95   | 35.425  | 0.707110376 | 0.0707   | 1.382  |
| 160457_at   | 6600.7  | 6965.8  | 6733   | 6986.4 | 6199.9  | 6333.7  | 7224.3 | 6990.5 | 0.640826059 | 6821.475 | 6687.1   | 134.375 | 1.02009466  | 0.604    | 1.022  |
| 160458_at   | 1201.8  | 791.7   | 1060.8 | 989.1  | 979     | 948.9   | 818.5  | 869.6  | 0.313186587 | 1010.85  | 904      | 106.85  | 1.118196903 | 0.3274   | -1.108 |
| 160459_r_at | 21.3    | 12.4    | 13.7   | 11.9   | 11.5    | 18.9    | 12.4   | 12.4   | 0.725870461 | 14.825   | 13.8     | 1.025   | 1.074275362 | 0.73     | -1.065 |
| 160460_at   | 1008.7  | 831.7   | 1224.9 | 976.6  | 962.8   | 1017.9  | 937.4  | 1046.2 | 0.831801048 | 1010.475 | 991.075  | 19.4    | 1.019574704 | 0.901    | 1.011  |
| 160461_f_at | 2995.9  | 3278.3  | 2351.7 | 2324.2 | 2924.6  | 2737.3  | 3199.9 | 2418.8 | 0.785709814 | 2737.525 | 2820.15  | 82.625  | 0.970701913 | 0.7438   | 1.036  |
| 160462_f_at | 2477.1  | 2893.6  | 2308.1 | 2125.7 | 2621.3  | 2750.8  | 2083.7 | 2269   | 0.932364395 | 2451.125 | 2431.2   | 19.925  | 1.008195541 | 0.9352   | 1.008  |
| 160463_at   | 363     | 295.5   | 279    | 403.3  | 314.3   | 341.7   | 282.4  | 347.1  | 0.691558752 | 335.2    | 321.375  | 13.825  | 1.043018281 | 0.7407   | -1.035 |
| 160464_s_at | 504.3   | 478.3   | 493.8  | 577.8  | 423.8   | 489.5   | 483    | 493.9  | 0.190595704 | 513.55   | 472.55   | 41      | 1.086763305 | 0.1849   | -1.086 |
| 160465_at   | 301.8   | 195.2   | 152.2  | 201.2  | 155.8   | 364.6   | 188.3  | 195.5  | 0.821338544 | 212.6    | 226.05   | 13.45   | 0.940499889 | 0.8797   | 1.037  |
| 160466_at   | 474.5   | 587.1   | 585    | 659.3  | 515.8   | 462.5   | 496.3  | 651.7  | 0.456336674 | 576.475  | 531.575  | 44.9    | 1.084465974 | 0.4437   | -1.086 |
| 160467_at   | 18.1    | 17.7    | 15.3   | 57     | 35      | 24.2    | 12.7   | 14.1   | 0.646947014 | 27.025   | 21.5     | 5.525   | 1.256976744 | 0.7068   | -1.165 |
| 160468_at   | 589.8   | 1015.3  | 1466.6 | 1424.2 | 1511.5  | 824.7   | 1258.2 | 1189.5 | 0.783642767 | 1123.975 | 1195.975 | 72      | 0.939798073 | 0.6998   | 1.105  |
| 160469_at   | 63.6    | 104     | 161.9  | 296.3  | 209.2   | 127.7   | 325.6  | 358    | 0.228177234 | 156.45   | 255.125  | 98.675  | 0.613228809 | 0.207    | 1.77   |
| 160470_at   | 167.4   | 235.1   | 278.8  | 213.9  | 325.9   | 221.9   | 230.8  | 271.2  | 0.287804828 | 223.8    | 262.45   | 38.65   | 0.852733854 | 0.2785   | 1.178  |
| 160471_at   | 833.1   | 990.8   | 1027.3 | 1100.7 | 846.6   | 946.3   | 903    | 889.2  | 0.205660384 | 987.975  | 896.275  | 91.7    | 1.102312348 | 0.1935   | -1.098 |
| 160472_r_at | 87.5    | 100.1   | 153    | 182    | 144.4   | 112.9   | 130.4  | 144.1  | 0.926978372 | 130.65   | 132.95   | 2.3     | 0.982700263 | 0.7637   | 1.059  |
| 160473_at   | 482.5   | 524.1   | 329.1  | 276.4  | 421.3   | 524.1   | 287.7  | 346.7  | 0.921355017 | 403.025  | 394.95   | 8.075   | 1.020445626 | 0.9585   | -1.011 |
| 160474_at   | 453     | 453     | 420.7  | 368.4  | 384.9   | 388.5   | 495.6  | 486.5  | 0.693199878 | 423.775  | 438.875  | 15.1    | 0.965593848 | 0.7244   | 1.032  |
| 160475_at   | 630.5   | 449.5   | 532    | 475.9  | 287.4   | 415.2   | 588.6  | 507.9  | 0.386175368 | 521.975  | 449.775  | 72.2    | 1.160524707 | 0.3496   | -1.191 |
| 160476_f_at | 13011.7 | 18070.2 | 9479.3 | 9530.6 | 13894.4 | 10937.6 | 8853.4 | 10848  | 0.571184158 | 12522.95 | 11133.35 | 1389.6  | 1.124814184 | 0.6189   | -1.098 |
| 160477_at   | 92.7    | 38.3    | 55.2   | 58.6   | 61.3    | 74.6    | 68.5   | 75.9   | 0.50188898  | 61.2     | 70.075   | 8.875   | 0.873349982 | 0.3711   | 1.199  |
| 160478_r_at | 63.6    | 11.8    | 13.6   | 22.3   | 36.9    | 97.5    | 14.5   | 27     | 0.495861743 | 27.825   | 43.975   | 16.15   | 0.632745878 | 0.4394   | 1.577  |
| 160479_at   | 331.6   | 402     | 380    | 400.3  | 474.3   | 393.2   | 510.2  | 395.1  | 0.114977265 | 378.475  | 443.2    | 64.725  | 0.853959838 | 0.1007   | 1.167  |
| 160480_at   | 464.3   | 538.7   | 696    | 907.8  | 603.5   | 518.1   | 729.6  | 834.3  | 0.875956246 | 651.7    | 671.375  | 19.675  | 0.97069447  | 0.8059   | 1.048  |
| 160481_at   | 8.5     | 38      | 30.7   | 10.5   | 33.6    | 29.9    | 28     | 5.6    | 0.816674707 | 21.925   | 24.275   | 2.35    | 0.903192585 | 0.8611   | 1.109  |
| 160482_at   | 1136.8  | 1200.5  | 997    | 1190.9 | 1265.4  | 1077.7  | 1378.9 | 1370.3 | 0.150768534 | 1131.3   | 1273.075 | 141.775 | 0.888635783 | 0.1566   | 1.123  |
| 160483_at   | 1194.6  | 1369.7  | 1466.8 | 1382.2 | 1328.8  | 1163.7  | 1556.3 | 1362.7 | 0.996527401 | 1353.325 | 1352.875 | 0.45    | 1.000332625 | 0.9701   | 1.003  |
| 160484_at   | 1427.6  | 1796    | 2134   | 2450.5 | 2030.2  | 1577.8  | 2394.1 | 2294.5 | 0.684558791 | 1952.025 | 2074.15  | 122.125 | 0.941120459 | 0.6656   | 1.07   |
| 160485_r_at | 333.2   | 461.8   | 605.8  | 569.2  | 492.3   | 495.8   | 498.4  | 626.2  | 0.631245334 | 492.5    | 528.175  | 35.675  | 0.932456099 | 0.5611   | 1.095  |
| 160486_at   | 580.8   | 591.1   | 453.8  | 421.2  | 518.6   | 549     | 533.5  | 550.6  | 0.591780725 | 511.725  | 537.925  | 26.2    | 0.951294325 | 0.5118   | 1.063  |
| 160487_at   | 152.7   | 147.7   | 130.3  | 144.2  | 156.5   | 115.6   | 92.8   | 98.4   | 0.146559699 | 143.725  | 115.825  | 27.9    | 1.240880639 | 0.1016   | -1.266 |



|             |        |        |        |        |        |        |        |        |              |          |          |         |             |         |        |
|-------------|--------|--------|--------|--------|--------|--------|--------|--------|--------------|----------|----------|---------|-------------|---------|--------|
| 160488_at   | 358.1  | 299.9  | 239.2  | 273.3  | 300    | 373.2  | 351.9  | 382.6  | 0.110110531  | 292.625  | 351.925  | 59.3    | 0.831498189 | 0.1069  | 1.211  |
| 160489_at   | 60.3   | 43.8   | 35.3   | 42.7   | 33.4   | 62.2   | 37.4   | 37.9   | 0.751431183  | 45.525   | 42.725   | 2.8     | 1.065535401 | 0.6873  | -1.078 |
| 160490_at   | 429.6  | 407    | 483.9  | 422.8  | 455.6  | 457.9  | 442.1  | 419    | 0.698166372  | 435.825  | 443.65   | 7.825   | 0.982362222 | 0.6659  | 1.02   |
| 160491_at   | 213.3  | 160.5  | 175.7  | 128    | 124    | 180.6  | 161.6  | 154.9  | 0.535224182  | 169.375  | 155.275  | 14.1    | 1.090806633 | 0.5705  | -1.082 |
| 160492_at   | 1125.1 | 1292.5 | 1198.2 | 1045.7 | 1400.1 | 1226.2 | 961.4  | 1027   | 0.921672752  | 1165.375 | 1153.675 | 11.7    | 1.010141504 | 0.8578  | -1.018 |
| 160493_at   | 6106.2 | 6804.2 | 5691.4 | 5059.3 | 5861.6 | 6228.2 | 5937.1 | 5678.2 | 0.978653321  | 5915.275 | 5926.275 | 11      | 0.998143859 | 0.917   | 1.007  |
| 160494_at   | 141.2  | 101.7  | 115.1  | 134.5  | 82.4   | 137.1  | 153.8  | 110.1  | 0.90497629   | 123.125  | 120.85   | 2.275   | 1.01882499  | 0.8191  | -1.038 |
| 160495_at   | 55.4   | 100.2  | 124.4  | 143.4  | 143    | 102.9  | 141.5  | 166.3  | 0.213968899  | 105.85   | 138.425  | 32.575  | 0.764674011 | 0.2268  | 1.368  |
| 160496_s_at | 1992.5 | 1682.6 | 2275.8 | 1999.1 | 1727.4 | 1735.9 | 1827.3 | 1636.1 | 0.122343017  | 1987.5   | 1731.675 | 255.825 | 1.147732687 | 0.09046 | -1.142 |
| 160497_at   | 793.3  | 894.5  | 938.4  | 733.4  | 972.5  | 950.3  | 737.1  | 805.1  | 0.732967903  | 839.9    | 866.25   | 26.35   | 0.96958153  | 0.7506  | 1.029  |
| 160498_at   | 455.7  | 567.2  | 540.4  | 635.8  | 529.5  | 594    | 524.1  | 600.5  | 0.785396396  | 549.775  | 562.025  | 12.25   | 0.978203817 | 0.7406  | -1.027 |
| 160499_at   | 6398.7 | 6731.8 | 5139   | 5535   | 6578.9 | 6897.5 | 6735.5 | 6220.3 | 0.175422062  | 5951.125 | 6608.05  | 656.925 | 0.900587163 | 0.1493  | 1.116  |
| 160500_at   | 70.3   | 62.6   | 89.3   | 43.5   | 63.6   | 68.8   | 47.8   | 68     | 0.700479753  | 66.425   | 62.05    | 4.375   | 1.070507655 | 0.7987  | -1.047 |
| 160501_at   | 537.2  | 620.3  | 564.2  | 591.5  | 615.8  | 526.8  | 562.4  | 594.3  | 0.899500616  | 578.3    | 574.825  | 3.475   | 1.006045318 | 0.8941  | 1.006  |
| 160502_at   | 299.5  | 275.1  | 266.4  | 253.2  | 350.6  | 295.5  | 254.4  | 206.3  | 0.927172663  | 273.55   | 276.7    | 3.15    | 0.988615829 | 0.9636  | 1.006  |
| 160503_at   | 2670.9 | 2540.6 | 2908.1 | 2583.1 | 2713.1 | 2743.8 | 2271.3 | 2266.7 | 0.308398046  | 2675.675 | 2498.725 | 176.95  | 1.070816116 | 0.2881  | -1.074 |
| 160504_at   | 3.2    | 1.2    | 1.5    | 2.2    | 1.5    | 3.1    | 1.7    | 1.1    | 0.7877783516 | 2.025    | 1.85     | 0.175   | 1.094594595 | 0.6989  | -1.134 |
| 160505_at   | 58.7   | 12.3   | 5.6    | 40.4   | 18.9   | 38     | 13     | 23.4   | 0.6825144    | 29.25    | 23.325   | 5.925   | 1.254019293 | 0.9083  | 1.073  |
| 160506_at   | 121.5  | 191.4  | 148.9  | 173.4  | 419.4  | 152.6  | 137.9  | 305.2  | 0.252354753  | 158.8    | 253.775  | 94.975  | 0.625751158 | 0.2391  | 1.455  |
| 160507_at   | 280.9  | 369.8  | 504.9  | 444.7  | 458.7  | 358.1  | 459.9  | 455.8  | 0.573370326  | 400.075  | 433.125  | 33.05   | 0.923694084 | 0.5167  | 1.102  |
| 160508_at   | 37.2   | 28.5   | 40.7   | 20.3   | 19     | 34.6   | 30.4   | 25.6   | 0.482064589  | 31.675   | 27.4     | 4.275   | 1.156021898 | 0.5341  | -1.143 |
| 160509_at   | 76.1   | 64.9   | 38.5   | 66.7   | 62     | 104.5  | 69.2   | 71     | 0.270975644  | 61.55    | 76.675   | 15.125  | 0.802738833 | 0.268   | 1.259  |
| 160510_f_at | 3.9    | 11.3   | 1.4    | 2.7    | 11.2   | 5.2    | 2.1    | 6.5    | 0.642642942  | 4.825    | 6.25     | 1.425   | 0.772       | 0.5225  | 1.463  |
| 160511_at   | 1857.3 | 2380.5 | 2285.6 | 2469.6 | 2664.8 | 2243.6 | 3030.6 | 2976.1 | 0.081117991  | 2248.25  | 2728.775 | 480.525 | 0.823904499 | 0.08629 | 1.212  |
| 160512_at   | 995    | 824.5  | 729.3  | 723    | 724.1  | 1098.8 | 739.8  | 772.8  | 0.889312017  | 817.95   | 833.875  | 15.925  | 0.980902413 | 0.922   | 1.013  |
| 160513_at   | 648.3  | 677.2  | 666.7  | 647.2  | 718.4  | 769.7  | 708.6  | 676.1  | 0.050485356  | 659.85   | 718.2    | 58.35   | 0.918755221 | 0.02764 | 1.087  |
| 160514_at   | 839.5  | 1151.8 | 745    | 780.2  | 850.8  | 645.2  | 725.7  | 866.7  | 0.364918926  | 879.125  | 772.1    | 107.025 | 1.138615464 | 0.3514  | -1.13  |
| 160515_at   | 580    | 520.5  | 541.2  | 510    | 636.8  | 663.9  | 651.6  | 530.8  | 0.066156035  | 537.925  | 620.775  | 82.85   | 0.866537795 | 0.05432 | 1.151  |
| 160516_at   | 1288.3 | 1245.8 | 1406.3 | 1228.2 | 1139.4 | 1234   | 1166.4 | 1303.3 | 0.185349104  | 1292.15  | 1210.775 | 81.375  | 1.067209019 | 0.1793  | -1.067 |
| 160517_at   | 341.6  | 291.6  | 920.6  | 333.1  | 221    | 519.5  | 400.6  | 297.4  | 0.52969091   | 471.725  | 359.625  | 112.1   | 1.311713591 | 0.5573  | -1.223 |
| 160518_at   | 1372.3 | 1553.1 | 1457.1 | 1351.3 | 1935.3 | 1627.2 | 1601.3 | 1463.2 | 0.107753399  | 1433.45  | 1656.75  | 223.3   | 0.865218047 | 0.07802 | 1.152  |
| 160519_at   | 1979.6 | 2220.2 | 2447.4 | 2504.6 | 2441   | 2431.4 | 2499.8 | 2179   | 0.506327612  | 2287.95  | 2387.8   | 99.85   | 0.958183265 | 0.4887  | 1.047  |
| 160520_at   | 1537.6 | 1481.1 | 2172.7 | 2453.5 | 1566.3 | 1352.2 | 1936.6 | 2079.1 | 0.567355816  | 1911.225 | 1733.55  | 177.675 | 1.102491996 | 0.5999  | -1.092 |
| 160521_at   | 333.9  | 368.4  | 335.2  | 291.5  | 496.1  | 371.6  | 376.4  | 381.9  | 0.08509198   | 332.25   | 406.5    | 74.25   | 0.817343173 | 0.05728 | 1.219  |
| 160522_at   | 6903.7 | 7205.9 | 5714.1 | 5152   | 6095.8 | 6569   | 6927.7 | 6755.8 | 0.545666199  | 6243.925 | 6587.075 | 343.15  | 0.947905557 | 0.4897  | 1.064  |
| 160523_at   | 11.3   | 21.6   | 16.7   | 24.8   | 37     | 83.1   | 27.2   | 45.3   | 0.091228798  | 18.6     | 48.15    | 29.55   | 0.386292835 | 0.02114 | 2.47   |
| 160524_at   | 114.6  | 104.9  | 351    | 285.4  | 200.7  | 111.4  | 205    | 153    | 0.519853634  | 213.975  | 167.525  | 46.45   | 1.277272049 | 0.7053  | -1.145 |
| 160525_f_at | 6.3    | 4.5    | 1.1    | 6.3    | 3.6    | 5.4    | 5.4    | 10.7   | 0.415186581  | 4.55     | 6.275    | 1.725   | 0.725099602 | 0.3946  | 1.548  |
| 160526_s_at | 83.9   | 85.8   | 65.5   | 90.2   | 103.2  | 108.6  | 89     | 88.2   | 0.077618414  | 81.35    | 97.25    | 15.9    | 0.836503856 | 0.08633 | 1.199  |
| 160527_at   | 234.8  | 239.5  | 205.6  | 171.9  | 201.5  | 304.3  | 158.6  | 173.2  | 0.926656219  | 212.95   | 209.4    | 3.55    | 1.0169532   | 0.8084  | -1.042 |
| 160528_at   | 47.4   | 6.3    | 3.9    | 9.7    | 12.8   | 11.9   | 4.7    | 8.2    | 0.52489724   | 16.825   | 9.4      | 7.425   | 1.789893617 | 0.7952  | -1.173 |
| 160529_r_at | 1238.1 | 1339.7 | 1328.9 | 1658.2 | 1664.8 | 1386.5 | 1432.5 | 1448.7 | 0.44289966   | 1391.225 | 1483.125 | 91.9    | 0.938036241 | 0.4018  | 1.07   |
| 160530_at   | 716    | 758.1  | 939.6  | 940.9  | 1041.4 | 788    | 1026   | 850.1  | 0.351071435  | 838.65   | 926.375  | 87.725  | 0.905302928 | 0.3536  | 1.105  |
| 160531_at   | 2177.2 | 2790.2 | 2438.8 | 2273.7 | 2697.6 | 2404.9 | 1971.4 | 2482.7 | 0.884577379  | 2419.975 | 2389.15  | 30.825  | 1.012902078 | 0.8689  | -1.015 |
| 160532_at   | 3546.7 | 3731.5 | 3665.3 | 3972.7 | 2724.7 | 2831.9 | 4408.1 | 3626.3 | 0.465405437  | 3729.05  | 3397.75  | 331.3   | 1.097505702 | 0.3702  | -1.118 |
| 160533_r_at | 607.9  | 496.8  | 377.9  | 415.6  | 410.6  | 510.7  | 437.9  | 468.4  | 0.765220268  | 474.55   | 456.9    | 17.65   | 1.038629897 | 0.8384  | -1.025 |
| 160534_at   | 1205   | 1111.3 | 1517.3 | 1235.4 | 1549   | 1451.1 | 1236.7 | 1325.6 | 0.312056756  | 1267.25  | 1390.6   | 123.35  | 0.911297282 | 0.2901  | 1.101  |
| 160535_at   | 828.5  | 867.7  | 1155.1 | 1156.2 | 890.8  | 870.1  | 1050.2 | 1143.8 | 0.909590279  | 1001.875 | 988.725  | 13.15   | 1.013299957 | 0.9472  | 1.008  |
| 160536_at   | 442.7  | 437.5  | 456.7  | 440.2  | 420    | 445.4  | 425.7  | 414.7  | 0.074065001  | 444.275  | 426.45   | 17.825  | 1.04179857  | 0.06435 | -1.042 |
| 160537_at   | 12.5   | 17.3   | 3      | 14.8   | 20.7   | 44.2   | 2.4    | 3.8    | 0.59960898   | 11.9     | 17.775   | 5.875   | 0.669479606 | 0.964   | -1.038 |
| 160538_at   | 5375.3 | 5702.9 | 4566.7 | 4076.6 | 5179.8 | 5662.3 | 4467.6 | 4406.3 | 0.997802332  | 4930.375 | 4929     | 1.375   | 1.000278961 | 0.9773  | 1.003  |
| 160539_at   | 318.6  | 279.4  | 575.1  | 600    | 248    | 382.8  | 581.6  | 517.5  | 0.926311691  | 443.275  | 432.475  | 10.8    | 1.024972542 | 0.9495  | 1.018  |
| 160540_at   | 803.7  | 856    | 918.7  | 982.1  | 1033.9 | 808.5  | 1013   | 1086.6 | 0.242967498  | 890.125  | 985.5    | 95.375  | 0.903221715 | 0.2576  | 1.103  |
| 160541_at   | 198.3  | 88.6   | 98.3   | 86.7   | 104.1  | 215.7  | 85.9   | 106.9  | 0.807577785  | 117.975  | 128.15   | 10.175  | 0.920600858 | 0.7854  | 1.084  |
| 160542_at   | 408.7  | 525.4  | 626.5  | 495.5  | 393.7  | 431.4  | 607.8  | 445.6  | 0.521740817  | 514.025  | 469.625  | 44.4    | 1.094543519 | 0.4995  | -1.097 |
| 160543_at   | 5380   | 5268.7 | 5565.9 | 5660.2 | 5113.5 | 4761   | 5076.6 | 5210.3 | 0.017536992  | 5468.7   | 5040.35  | 428.35  | 1.084984178 | 0.01831 | -1.085 |



|             |        |        |        |        |        |        |        |        |             |          |          |          |             |          |        |
|-------------|--------|--------|--------|--------|--------|--------|--------|--------|-------------|----------|----------|----------|-------------|----------|--------|
| 160544_at   | 513.4  | 488    | 397.9  | 363.9  | 346.2  | 544.8  | 288.2  | 376.9  | 0.464910714 | 440.8    | 389.025  | 51.775   | 1.133089133 | 0.3977   | -1.153 |
| 160545_at   | 1787   | 2054.2 | 2319.1 | 1922.7 | 1980.2 | 1969.5 | 2152.1 | 2320.3 | 0.570310483 | 2020.75  | 2105.525 | 84.775   | 0.959736883 | 0.5443   | 1.044  |
| 160546_at   | 173.2  | 250.6  | 157.6  | 167.6  | 294.5  | 283.4  | 264.4  | 232.3  | 0.023036569 | 187.25   | 268.65   | 81.4     | 0.697003536 | 0.01863  | 1.454  |
| 160547_s_at | 1704.6 | 3037.2 | 2799   | 2589.1 | 2384   | 2948.5 | 2596.6 | 2289.5 | 0.948639685 | 2532.475 | 2554.65  | 22.175   | 0.99131975  | 0.854    | 1.027  |
| 160548_at   | 310.8  | 190    | 161.4  | 206.1  | 164    | 381.5  | 161.3  | 148.9  | 0.963148093 | 217.075  | 213.925  | 3.15     | 1.014724787 | 0.8062   | -1.069 |
| 160549_at   | 3146.3 | 3080.8 | 3454.7 | 3609.1 | 2998.3 | 3373.9 | 3762   | 3756   | 0.52675465  | 3322.725 | 3472.55  | 149.825  | 0.956854473 | 0.5474   | 1.043  |
| 160550_i_at | 2282.9 | 2516.5 | 2267.5 | 2338.1 | 2494.8 | 2241.6 | 2103.9 | 2002   | 0.3019828   | 2351.25  | 2210.575 | 140.675  | 1.063637289 | 0.2719   | -1.066 |
| 160551_at   | 3591.5 | 4121.4 | 3548.9 | 3691.9 | 3860.7 | 3204.4 | 3583.2 | 3476.5 | 0.314338967 | 3738.425 | 3531.2   | 207.225  | 1.058684017 | 0.3067   | -1.059 |
| 160552_at   | 1919.9 | 1394.6 | 1678.4 | 1366.2 | 1613.2 | 1912.7 | 1486   | 1237.5 | 0.891023851 | 1589.775 | 1562.35  | 27.425   | 1.017553685 | 0.8761   | -1.02  |
| 160553_at   | 27.2   | 42.7   | 31.7   | 41.6   | 85.4   | 110.1  | 19.3   | 37.8   | 0.284031106 | 35.8     | 63.15    | 27.35    | 0.566904196 | 0.3969   | 1.455  |
| 160554_at   | 1165.7 | 1658.7 | 1135.3 | 1484   | 1652.3 | 1505.5 | 1110.8 | 1458.9 | 0.692679329 | 1360.925 | 1431.875 | 70.95    | 0.950449585 | 0.687    | 1.055  |
| 160555_r_at | 8111.4 | 7072.4 | 5844.2 | 5254.5 | 5415.2 | 5785.7 | 5324.2 | 5228.3 | 0.173427723 | 6570.625 | 5438.35  | 1132.275 | 1.208201936 | 0.1273   | -1.192 |
| 160556_at   | 906.2  | 1213.3 | 1117.5 | 951.8  | 1331.5 | 943.9  | 1064.5 | 900.6  | 0.918344269 | 1047.2   | 1060.125 | 12.925   | 0.987808042 | 0.9486   | 1.007  |
| 160557_at   | 1051.3 | 1068.2 | 989.5  | 912.5  | 934.3  | 1056.1 | 904.3  | 956.2  | 0.410748529 | 1005.375 | 962.725  | 42.65    | 1.044301332 | 0.4116   | -1.044 |
| 160558_at   | 1236.3 | 1384.4 | 1675.5 | 1396.9 | 1382.4 | 1383.5 | 1575.6 | 1262.6 | 0.850065688 | 1423.275 | 1401.025 | 22.25    | 1.01588123  | 0.8735   | 1.013  |
| 160559_at   | 261.6  | 229.5  | 174.5  | 183.8  | 147.4  | 228.1  | 158.1  | 241.8  | 0.578476294 | 212.35   | 193.85   | 18.5     | 1.095434614 | 0.5451   | -1.106 |
| 160560_at   | 2.6    | 18.5   | 7.2    | 3.7    | 5.1    | 8.9    | 3.8    | 8      | 0.708123299 | 8        | 6.45     | 1.55     | 1.240310078 | 0.9873   | 1.008  |
| 160561_at   | 6496.1 | 7957   | 4494.2 | 4394.1 | 7245.9 | 5958.2 | 5559.8 | 6469.2 | 0.637916824 | 5835.35  | 6308.275 | 472.925  | 0.925031011 | 0.5259   | 1.111  |
| 160562_at   | 3420   | 3687   | 3623.8 | 2974.2 | 4610.2 | 3656.4 | 3104.9 | 3202.6 | 0.596095873 | 3426.25  | 3643.525 | 217.275  | 0.940366815 | 0.6265   | 1.054  |
| 160563_at   | 69.1   | 82.2   | 86.8   | 103.6  | 88.4   | 67.3   | 118.5  | 88.6   | 0.694527669 | 85.425   | 90.7     | 5.275    | 0.941841235 | 0.7367   | 1.051  |
| 160564_at   | 46.5   | 156.7  | 123.2  | 54.3   | 107.3  | 312.8  | 77.9   | 189.9  | 0.256328127 | 95.175   | 171.975  | 76.8     | 0.553423463 | 0.2254   | 1.786  |
| 160565_at   | 51.2   | 46.1   | 40.4   | 47.2   | 40.4   | 36.8   | 32.4   | 26.9   | 0.018076715 | 46.225   | 34.125   | 12.1     | 1.354578755 | 0.02173  | -1.365 |
| 160566_at   | 45.7   | 39.5   | 48.4   | 35.2   | 53.4   | 47.3   | 35.2   | 46.6   | 0.506222689 | 42.2     | 45.625   | 3.425    | 0.924931507 | 0.5356   | 1.077  |
| 160567_at   | 249.2  | 235.5  | 221.3  | 231.7  | 249.8  | 363    | 231.5  | 237.4  | 0.332811931 | 234.425  | 270.425  | 36       | 0.866876213 | 0.2871   | 1.134  |
| 160568_at   | 4954   | 4002.2 | 3826.4 | 2607   | 5258.8 | 5271.3 | 3510.8 | 3562   | 0.455607121 | 3847.4   | 4400.725 | 553.325  | 0.874265036 | 0.4564   | 1.151  |
| 160569_at   | 3080.9 | 4105   | 3324   | 3296.5 | 4043.7 | 3624.9 | 4198.2 | 3829.8 | 0.129061033 | 3451.6   | 3924.15  | 472.55   | 0.879579017 | 0.1064   | 1.142  |
| 160570_at   | 17.2   | 12.7   | 29.5   | 18.6   | 13.1   | 46.4   | 7.2    | 8.5    | 0.947385491 | 19.5     | 18.8     | 0.7      | 1.037234043 | 0.5476   | -1.337 |
| 160571_at   | 1739.3 | 2099.9 | 2257.5 | 2192.4 | 2984.5 | 2694.9 | 2843.8 | 2582.6 | 0.003443518 | 2072.275 | 2776.45  | 704.175  | 0.746375768 | 0.004346 | 1.344  |
| 160572_at   | 291.2  | 209.5  | 191.5  | 206.4  | 185.8  | 344.9  | 203.9  | 201.7  | 0.836966908 | 224.65   | 234.075  | 9.425    | 0.959735128 | 0.8997   | 1.023  |
| 160573_at   | 590.3  | 584.8  | 647.4  | 665.9  | 564.4  | 564.6  | 598.5  | 637    | 0.290744533 | 622.1    | 591.125  | 30.975   | 1.052400085 | 0.2884   | -1.052 |
| 160574_at   | 171.7  | 161    | 181.2  | 191.5  | 139    | 180    | 153.3  | 202.8  | 0.65141228  | 176.35   | 168.775  | 7.575    | 1.04488224  | 0.5877   | -1.054 |
| 160575_at   | 1469.4 | 1860.7 | 2120.4 | 2322.5 | 1978.2 | 1415.3 | 2328.4 | 2271   | 0.850090014 | 1943.25  | 1998.225 | 54.975   | 0.972488083 | 0.8809   | 1.024  |
| 160576_at   | 174.5  | 106.9  | 95.5   | 114.1  | 129.5  | 202.3  | 93.2   | 106.4  | 0.749479511 | 122.75   | 132.85   | 10.1     | 0.923974407 | 0.7835   | 1.064  |
| 160577_at   | 418.9  | 409.6  | 556    | 573.7  | 438.9  | 338.5  | 433.6  | 437.3  | 0.185987916 | 489.55   | 412.075  | 77.475   | 1.188011891 | 0.1825   | -1.181 |
| 160578_at   | 579.5  | 497.7  | 626.4  | 700.7  | 591.5  | 562.3  | 762.5  | 673.7  | 0.481911549 | 601.075  | 647.5    | 46.425   | 0.928301158 | 0.4787   | 1.078  |
| 160579_at   | 73.2   | 115.3  | 127.2  | 140.3  | 106    | 86.5   | 174.6  | 161.5  | 0.510847017 | 114      | 132.15   | 18.15    | 0.862656073 | 0.5642   | 1.144  |
| 160580_at   | 34.4   | 50     | 56.8   | 70     | 33.1   | 74.6   | 72.8   | 57.7   | 0.59902677  | 52.8     | 59.55    | 6.75     | 0.886649874 | 0.6785   | 1.11   |
| 160581_at   | 345.9  | 351    | 309.1  | 301.2  | 342.4  | 297.9  | 273.7  | 352.1  | 0.665010477 | 326.8    | 316.525  | 10.275   | 1.032461891 | 0.639    | 1.036  |
| 160582_at   | 340    | 382.6  | 332.1  | 305    | 537.6  | 459.8  | 341.8  | 409.6  | 0.095043142 | 339.925  | 437.2    | 97.275   | 0.777504575 | 0.06361  | 1.273  |
| 160583_at   | 86.9   | 110    | 118    | 114.2  | 92.4   | 102.6  | 157.3  | 111.6  | 0.611887635 | 107.275  | 115.975  | 8.7      | 0.924983833 | 0.6509   | 1.066  |
| 160584_at   | 161.6  | 121.4  | 86.8   | 147.2  | 87.6   | 151.1  | 125.2  | 128.4  | 0.77942739  | 129.25   | 123.075  | 6.175    | 1.050172659 | 0.8251   | -1.042 |
| 160585_at   | 193.4  | 205.6  | 212.6  | 235.2  | 256.9  | 224    | 206.3  | 190.4  | 0.664996103 | 211.7    | 219.4    | 7.7      | 0.964904284 | 0.6861   | 1.033  |
| 160586_r_at | 0.4    | 4.3    | 6.9    | 10.5   | 6.3    | 8.9    | 8.8    | 13.3   | 0.197397796 | 5.525    | 9.325    | 3.8      | 0.592493298 | 0.2308   | 2.628  |
| 160587_at   | 260.9  | 234.1  | 214.4  | 131.9  | 148.1  | 105.4  | 172.8  | 149.5  | 0.09347733  | 210.325  | 143.95   | 66.375   | 1.461097603 | 0.0945   | -1.439 |
| 160588_at   | 468.1  | 501.9  | 814.7  | 760.5  | 606.1  | 386.8  | 598.8  | 571    | 0.394582091 | 636.3    | 540.675  | 95.625   | 1.176862256 | 0.4327   | -1.161 |
| 160589_at   | 129.8  | 130.3  | 160.9  | 175.5  | 95.6   | 112.9  | 200    | 169.3  | 0.8697073   | 149.125  | 144.45   | 4.675    | 1.03236414  | 0.7346   | -1.069 |
| 160590_r_at | 496.5  | 524.5  | 307.7  | 353.1  | 432.1  | 458.6  | 380.7  | 445.6  | 0.883086647 | 420.45   | 429.25   | 8.8      | 0.979499126 | 0.762    | 1.044  |
| 160591_at   | 143.9  | 149    | 131.9  | 132.9  | 140.1  | 183.3  | 124.7  | 136.9  | 0.64123231  | 139.425  | 146.25   | 6.825    | 0.953333333 | 0.6792   | 1.039  |
| 160592_at   | 549.1  | 420.8  | 427.8  | 554.5  | 417.2  | 530.3  | 448.3  | 508.4  | 0.800458913 | 488.05   | 476.05   | 12       | 1.025207436 | 0.8316   | -1.021 |
| 160593_at   | 1789.7 | 1438.8 | 1351.1 | 1502.6 | 1353.7 | 1608.4 | 1548.7 | 1355.8 | 0.659113443 | 1520.55  | 1466.65  | 53.9     | 1.036750418 | 0.6709   | -1.034 |
| 160594_at   | 56.2   | 94.7   | 81.8   | 146.5  | 95.5   | 75.3   | 92.3   | 112.1  | 0.963372023 | 94.8     | 93.8     | 1        | 1.010660981 | 0.8647   | 1.039  |
| 160595_at   | 163.4  | 217.1  | 236.8  | 309.4  | 300.3  | 315.4  | 251.5  | 388.3  | 0.094437818 | 231.675  | 313.875  | 82.2     | 0.738112306 | 0.0929   | 1.373  |
| 160596_at   | 279.8  | 332.2  | 271    | 236.3  | 337.2  | 294.3  | 288.5  | 248.5  | 0.663430931 | 279.825  | 292.125  | 12.3     | 0.957894737 | 0.6517   | 1.046  |
| 160597_at   | 201.8  | 167.3  | 226.9  | 222.4  | 163    | 162.4  | 241.7  | 204.2  | 0.633958524 | 204.6    | 192.825  | 11.775   | 1.061065733 | 0.5963   | -1.069 |
| 160598_at   | 221.2  | 256.1  | 201.4  | 220.9  | 118.3  | 142.8  | 222.9  | 212    | 0.141817581 | 224.9    | 174      | 50.9     | 1.292528736 | 0.1255   | -1.333 |
| 160599_r_at | 823.1  | 1116.1 | 734    | 722.3  | 932.8  | 968.9  | 691.9  | 636.4  | 0.750826937 | 848.875  | 807.5    | 41.375   | 1.05123839  | 0.741    | -1.052 |



|             |        |        |        |        |        |        |        |        |             |          |          |         |             |           |        |
|-------------|--------|--------|--------|--------|--------|--------|--------|--------|-------------|----------|----------|---------|-------------|-----------|--------|
| 160600_at   | 100.4  | 96.6   | 165.1  | 175.6  | 94.5   | 92.7   | 149.4  | 156.7  | 0.696404219 | 134.425  | 123.325  | 11.1    | 1.090006081 | 0.725     | -1.082 |
| 160601_at   | 31.4   | 49.5   | 61.5   | 47.2   | 73.4   | 39.6   | 51.1   | 34.1   | 0.847770885 | 47.4     | 49.55    | 2.15    | 0.956609485 | 0.8982    | 1.03   |
| 160602_at   | 730    | 692.5  | 731.5  | 552.4  | 636.9  | 617.8  | 681.2  | 692.6  | 0.693365234 | 676.6    | 657.125  | 19.475  | 1.029636675 | 0.7507    | -1.024 |
| 160603_at   | 549.5  | 491.9  | 512.8  | 893.5  | 303.8  | 458    | 874    | 762.5  | 0.942130043 | 611.925  | 599.575  | 12.35   | 1.020597924 | 0.8044    | -1.075 |
| 160604_at   | 7.6    | 13.4   | 9.2    | 16.3   | 5      | 10.8   | 10.8   | 4.5    | 0.196173471 | 11.625   | 7.775    | 3.85    | 1.495176849 | 0.1827    | -1.558 |
| 160605_s_at | 144.3  | 152.3  | 227.4  | 266.8  | 194.9  | 167    | 299.5  | 266.3  | 0.453667535 | 197.7    | 231.925  | 34.225  | 0.852430743 | 0.4418    | 1.181  |
| 160606_r_at | 14.6   | 17     | 3.1    | 18.7   | 13.5   | 19     | 12.5   | 22.5   | 0.441508448 | 13.35    | 16.875   | 3.525   | 0.791111111 | 0.4008    | 1.495  |
| 160607_at   | 368.5  | 412.1  | 510.3  | 673.2  | 434.1  | 420.5  | 643.9  | 573.2  | 0.767372752 | 491.025  | 517.925  | 26.9    | 0.948061978 | 0.7182    | 1.066  |
| 160608_at   | 91.4   | 258.7  | 288.2  | 168.5  | 216.6  | 85.1   | 126.1  | 108.1  | 0.257626084 | 201.7    | 133.975  | 67.725  | 1.505504758 | 0.29      | -1.462 |
| 160609_at   | 1625.6 | 1559.3 | 1692   | 1291.1 | 1402.3 | 1581.7 | 1571.3 | 1444.5 | 0.690056095 | 1542     | 1499.95  | 42.05   | 1.028034268 | 0.7344    | 1.024  |
| 160610_at   | 39.5   | 33.8   | 32.9   | 30.6   | 43.5   | 47.2   | 45.6   | 37.5   | 0.017718286 | 34.2     | 43.45    | 9.25    | 0.787111623 | 0.01739   | 1.271  |
| 160611_at   | 358.8  | 354.1  | 324.4  | 346.5  | 476.5  | 522.3  | 540.8  | 539.5  | 0.000284801 | 345.95   | 519.775  | 173.825 | 0.665576451 | 0.0000346 | 1.502  |
| 160612_at   | 444.7  | 403.2  | 476.4  | 637.5  | 419.7  | 608.8  | 654.5  | 572.8  | 0.348205064 | 490.45   | 563.95   | 73.5    | 0.869669297 | 0.3485    | 1.152  |
| 160613_at   | 288.3  | 211    | 271.4  | 306.1  | 210.9  | 260.2  | 123.6  | 232.4  | 0.139515322 | 269.2    | 206.775  | 62.425  | 1.301898199 | 0.1645    | -1.338 |
| 160614_at   | 302.6  | 599    | 452.7  | 1036.4 | 326.3  | 302.8  | 799.8  | 890.5  | 0.938361186 | 597.675  | 579.85   | 17.825  | 1.030740709 | 0.9063    | -1.049 |
| 160615_at   | 259.4  | 278.1  | 396.5  | 482.4  | 354.2  | 282.8  | 396.7  | 504.9  | 0.678282989 | 354.1    | 384.65   | 30.55   | 0.920577148 | 0.6403    | 1.098  |
| 160616_at   | 1027   | 822.3  | 758.6  | 1315.9 | 711.9  | 898.6  | 1146.1 | 1038.9 | 0.845090806 | 980.95   | 948.875  | 32.075  | 1.033803188 | 0.8802    | -1.026 |
| 160617_at   | 327    | 500.5  | 517.4  | 440.1  | 313.4  | 374.6  | 280.8  | 282.5  | 0.045106209 | 446.25   | 312.825  | 133.425 | 1.426516423 | 0.03157   | -1.414 |
| 160618_at   | 84.4   | 124.2  | 78.5   | 113.9  | 97.1   | 135    | 131.6  | 129.8  | 0.157012855 | 100.25   | 123.375  | 23.125  | 0.812563323 | 0.1612    | 1.243  |
| 160619_at   | 356.2  | 335.6  | 326    | 336    | 309.6  | 377.9  | 386.6  | 333.5  | 0.527976654 | 338.45   | 351.9    | 13.45   | 0.961778914 | 0.5489    | 1.036  |
| 160620_at   | 73.7   | 66.1   | 153.2  | 172.7  | 130.7  | 95.6   | 124.7  | 140.3  | 0.836033933 | 116.425  | 122.825  | 6.4     | 0.947893344 | 0.6307    | 1.141  |
| 160621_at   | 557.2  | 667.7  | 661.3  | 578.6  | 845.7  | 597    | 491.6  | 676    | 0.67310306  | 616.2    | 652.575  | 36.375  | 0.944259281 | 0.749     | 1.042  |
| 160622_at   | 192.9  | 198.1  | 240.7  | 215    | 201.8  | 165.1  | 193.4  | 143.8  | 0.084401041 | 211.675  | 176.025  | 35.65   | 1.20252805  | 0.08532   | -1.209 |
| 160623_at   | 28.6   | 41.6   | 48.1   | 66.6   | 62.7   | 53.7   | 66.5   | 85.5   | 0.091881186 | 46.225   | 67.1     | 20.875  | 0.688897168 | 0.09076   | 1.496  |
| 160624_at   | 346.4  | 469.7  | 491.8  | 506.1  | 473.8  | 301.4  | 384.7  | 351.3  | 0.191638246 | 453.5    | 377.8    | 75.7    | 1.200370566 | 0.2003    | -1.204 |
| 160625_f_at | 392.1  | 263.9  | 311.8  | 299.8  | 332.1  | 390.1  | 361.9  | 341.3  | 0.253781541 | 316.9    | 356.35   | 39.45   | 0.889294233 | 0.2111    | 1.134  |
| 160626_at   | 1424.2 | 2095.3 | 1892   | 2224.8 | 1826.6 | 1351.5 | 1665.6 | 1989.9 | 0.403206907 | 1909.075 | 1708.4   | 200.675 | 1.117463709 | 0.4384    | -1.113 |
| 160627_at   | 409.4  | 338.8  | 326.8  | 391.3  | 347.6  | 421.9  | 369.7  | 321.3  | 0.962086324 | 366.575  | 365.125  | 1.45    | 1.003971243 | 0.9562    | 1.005  |
| 160628_at   | 135.1  | 104.4  | 129.9  | 115    | 160    | 155.7  | 132.9  | 115.5  | 0.169590092 | 121.1    | 141.025  | 19.925  | 0.858712994 | 0.1712    | 1.161  |
| 160629_at   | 506.5  | 494.4  | 488.4  | 283.4  | 775.2  | 672.4  | 461.8  | 483    | 0.150920452 | 443.175  | 598.1    | 154.925 | 0.740971409 | 0.1601    | 1.353  |
| 160630_at   | 122.5  | 173.7  | 183.4  | 149.1  | 214.4  | 232.7  | 180.8  | 220.6  | 0.0215562   | 157.175  | 212.125  | 54.95   | 0.740954626 | 0.02691   | 1.36   |
| 160631_s_at | 6.8    | 4.1    | 2.6    | 5      | 3.2    | 5.2    | 9.9    | 5.4    | 0.470240208 | 4.625    | 5.925    | 1.3     | 0.780590717 | 0.4917    | 1.25   |
| 160632_at   | 552.6  | 722.6  | 874.7  | 857.8  | 826.1  | 611.4  | 1001.2 | 846    | 0.550610537 | 751.925  | 821.175  | 69.25   | 0.91566962  | 0.5687    | 1.093  |
| 160633_at   | 1925.1 | 2346.7 | 2194.5 | 2097   | 2084.8 | 2258.1 | 1857.1 | 2017.9 | 0.503181209 | 2140.825 | 2054.475 | 86.35   | 1.042030202 | 0.5056    | -1.042 |
| 160634_at   | 138.7  | 155.3  | 111.8  | 116    | 179.4  | 213.8  | 93.1   | 158.2  | 0.325982084 | 130.45   | 161.125  | 30.675  | 0.80961986  | 0.4022    | 1.192  |
| 160635_at   | 446    | 324.5  | 324.7  | 302.8  | 291.1  | 332.9  | 406.1  | 353    | 0.929789559 | 349.5    | 345.775  | 3.725   | 1.010772901 | 0.9585    | 1.006  |
| 160636_at   | 394.1  | 357    | 276.4  | 293.1  | 304.1  | 385.2  | 269.5  | 244.8  | 0.504198029 | 330.15   | 300.9    | 29.25   | 1.097208375 | 0.4781    | -1.102 |
| 160637_at   | 588.5  | 623    | 657.1  | 684.7  | 767    | 741.3  | 786.7  | 716.8  | 0.00542312  | 638.325  | 752.95   | 114.625 | 0.847765456 | 0.005071  | 1.181  |
| 160638_at   | 608    | 593.3  | 665.2  | 720.1  | 566.7  | 666.5  | 798.6  | 729.1  | 0.4809551   | 646.65   | 690.225  | 43.575  | 0.936868412 | 0.5073    | 1.062  |
| 160639_at   | 45.8   | 52.2   | 45.8   | 42.2   | 66.8   | 87.4   | 9.2    | 71.8   | 0.52550575  | 46.5     | 58.8     | 12.3    | 0.790816327 | 0.9331    | -1.048 |
| 160640_at   | 379.8  | 416.1  | 410.5  | 388.4  | 386.4  | 349.7  | 478.4  | 439.4  | 0.648141221 | 398.7    | 413.475  | 14.775  | 0.96426628  | 0.6938    | 1.03   |
| 160641_at   | 202.7  | 171.3  | 116.1  | 191.1  | 99.3   | 177.3  | 91.4   | 169.7  | 0.273773026 | 170.3    | 134.425  | 35.875  | 1.266877441 | 0.2719    | -1.296 |
| 160642_at   | 125.4  | 196.1  | 227.7  | 277.9  | 269.8  | 387.4  | 268.5  | 247.2  | 0.103558332 | 206.775  | 293.225  | 86.45   | 0.705175207 | 0.106     | 1.453  |
| 160643_at   | 1388.5 | 1520.6 | 1837   | 1910   | 2084.9 | 1421.1 | 1939.9 | 2110.5 | 0.313041367 | 1664.025 | 1889.1   | 225.075 | 0.880855963 | 0.3436    | 1.131  |
| 160644_at   | 294.9  | 252.7  | 236.4  | 226    | 212.5  | 370.8  | 219.3  | 215.9  | 0.961780813 | 252.5    | 254.625  | 2.125   | 0.991654394 | 0.9158    | -1.016 |
| 160645_at   | 375.3  | 153.5  | 239.7  | 286.8  | 203.7  | 291    | 265.6  | 219.8  | 0.72807709  | 263.825  | 245.025  | 18.8    | 1.076726865 | 0.8747    | -1.034 |
| 160646_at   | 930.6  | 727.1  | 1174   | 985.5  | 899.2  | 898.4  | 795.1  | 888.5  | 0.435320461 | 954.3    | 870.3    | 84      | 1.096518442 | 0.4739    | -1.082 |
| 160647_at   | 29.3   | 14     | 10.7   | 31.5   | 15.4   | 16.3   | 12.6   | 10.8   | 0.246722321 | 21.375   | 13.775   | 7.6     | 1.551724138 | 0.2684    | -1.416 |
| 160648_at   | 1693.2 | 1576.1 | 1973.3 | 1524.3 | 1471.1 | 1486.7 | 1558.7 | 1423.3 | 0.128847254 | 1691.725 | 1484.95  | 206.775 | 1.139247113 | 0.08214   | -1.134 |
| 160649_at   | 13.9   | 10.8   | 10     | 10.5   | 12.2   | 11.9   | 11     | 11.7   | 0.688655994 | 11.3     | 11.7     | 0.4     | 0.965811966 | 0.6026    | 1.043  |
| 160650_at   | 119    | 113.4  | 148.1  | 157.4  | 92.2   | 124.6  | 125.8  | 169.5  | 0.749618232 | 134.475  | 128.025  | 6.45    | 1.050380785 | 0.688     | -1.064 |
| 160651_at   | 16.4   | 11     | 8.3    | 33.7   | 7.4    | 62.1   | 10.4   | 10.5   | 0.732938783 | 17.35    | 22.6     | 5.25    | 0.767699115 | 0.9995    | 1      |
| 160652_at   | 1274.6 | 1249.7 | 1293.3 | 1084.8 | 1841.8 | 1291.7 | 1443   | 1400.4 | 0.107653718 | 1225.6   | 1494.225 | 268.625 | 0.820224531 | 0.06864   | 1.211  |
| 160653_at   | 389.3  | 352.8  | 386    | 318.6  | 287.6  | 283.9  | 259.1  | 330.9  | 0.018888874 | 361.675  | 290.375  | 71.3    | 1.245544554 | 0.01865   | -1.246 |
| 160654_at   | 431    | 322.6  | 434.8  | 333.4  | 302.7  | 559.2  | 421.7  | 417.9  | 0.493218489 | 380.45   | 425.375  | 44.925  | 0.894387305 | 0.5349    | 1.103  |
| 160655_at   | 265.7  | 264.9  | 220.4  | 427.9  | 160.8  | 175    | 485.4  | 418.4  | 0.879614732 | 294.725  | 309.9    | 15.175  | 0.951032591 | 0.9107    | -1.038 |



|             |        |        |        |        |        |        |        |        |             |          |          |         |             |          |        |
|-------------|--------|--------|--------|--------|--------|--------|--------|--------|-------------|----------|----------|---------|-------------|----------|--------|
| 160656_i_at | 48.6   | 70.4   | 74.8   | 70.4   | 62.4   | 70.4   | 63.1   | 52.2   | 0.589509783 | 66.05    | 62.025   | 4.025   | 1.064893188 | 0.6571   | -1.056 |
| 160657_at   | 879.1  | 968.1  | 1277.4 | 1430.9 | 1367.1 | 1090.2 | 1321.7 | 1473.9 | 0.30481509  | 1138.875 | 1313.225 | 174.35  | 0.867235241 | 0.2795   | 1.169  |
| 160658_at   | 225.7  | 114.8  | 135.2  | 136.1  | 116.7  | 149.7  | 172.2  | 142.9  | 0.794139833 | 152.95   | 145.375  | 7.575   | 1.052106621 | 0.8817   | -1.026 |
| 160659_at   | 604.9  | 902.6  | 597.3  | 549.5  | 718.1  | 560.6  | 576.3  | 545.2  | 0.515687422 | 663.575  | 600.05   | 63.525  | 1.105866178 | 0.5207   | -1.091 |
| 160660_r_at | 16.5   | 11.6   | 19.7   | 28.6   | 15.8   | 19.8   | 21.2   | 21.6   | 0.902361426 | 19.1     | 19.6     | 0.5     | 0.974489796 | 0.7399   | 1.073  |
| 160661_at   | 157.1  | 156.9  | 192.5  | 196.6  | 160.3  | 202    | 113.5  | 185.6  | 0.658735662 | 175.775  | 165.35   | 10.425  | 1.06304808  | 0.6001   | -1.081 |
| 160662_r_at | 68.3   | 54.7   | 40.5   | 120.2  | 37.1   | 46.8   | 91.6   | 71.8   | 0.685762371 | 70.925   | 61.825   | 9.1     | 1.147189648 | 0.7187   | -1.123 |
| 160663_at   | 245.3  | 199.8  | 195.1  | 164.3  | 267.5  | 295.8  | 175.2  | 205.9  | 0.328914447 | 201.125  | 236.1    | 34.975  | 0.851863617 | 0.3436   | 1.161  |
| 160664_at   | 457    | 373    | 438.1  | 508.6  | 369.5  | 498.9  | 501.4  | 422.8  | 0.928549259 | 444.175  | 448.15   | 3.975   | 0.991130202 | 0.9435   | -1.007 |
| 160665_at   | 5.3    | 4.7    | 3.5    | 5.8    | 5      | 9.6    | 3.8    | 7.5    | 0.302284165 | 4.825    | 6.475    | 1.65    | 0.745173745 | 0.321    | 1.287  |
| 160666_at   | 418.5  | 690.8  | 775.9  | 571    | 862.4  | 524.5  | 643    | 635.3  | 0.636536415 | 614.05   | 666.3    | 52.25   | 0.92158187  | 0.6082   | 1.096  |
| 160667_at   | 442.1  | 456.2  | 637.1  | 693.1  | 482.3  | 464.1  | 456.2  | 438.3  | 0.224254738 | 557.125  | 460.225  | 96.9    | 1.210549188 | 0.1897   | -1.188 |
| 160668_at   | 1531.9 | 1898.2 | 1257.7 | 1149.7 | 1796   | 1343.5 | 1066.3 | 1205.2 | 0.659324693 | 1459.375 | 1352.75  | 106.625 | 1.07882092  | 0.6459   | -1.079 |
| 160669_at   | 1764.4 | 1741.7 | 1828.5 | 1816.8 | 1630.6 | 1727.2 | 2060   | 1676.3 | 0.894146169 | 1787.85  | 1773.525 | 14.325  | 1.008077135 | 0.8296   | -1.012 |
| 160670_at   | 19.1   | 41.3   | 21.2   | 55.1   | 37     | 44     | 48.5   | 112.7  | 0.242749814 | 34.175   | 60.55    | 26.375  | 0.564409579 | 0.1635   | 1.762  |
| 160671_at   | 358    | 401.5  | 353.6  | 384.5  | 258.3  | 264.6  | 280.3  | 295.3  | 0.000569896 | 374.4    | 274.625  | 99.775  | 1.363313609 | 0.00034  | -1.363 |
| 160672_at   | 279.1  | 308.4  | 298.9  | 240.9  | 350.1  | 314.2  | 278.3  | 301.3  | 0.217864178 | 281.825  | 310.975  | 29.15   | 0.906262561 | 0.2218   | 1.104  |
| 160673_at   | 41.2   | 73.4   | 87.9   | 94.6   | 82.5   | 75.2   | 66.2   | 51.7   | 0.710065786 | 74.275   | 68.9     | 5.375   | 1.078011611 | 0.8494   | -1.043 |
| 160674_at   | 150    | 99.6   | 74.3   | 93.3   | 48.9   | 78.4   | 90.8   | 75.7   | 0.159043899 | 104.3    | 73.45    | 30.85   | 1.420013615 | 0.135    | -1.408 |
| 160675_at   | 28.7   | 39.2   | 19.3   | 28.8   | 43.3   | 27.3   | 45.5   | 44.7   | 0.108246529 | 29       | 40.2     | 11.2    | 0.721393035 | 0.127    | 1.4    |
| 160676_at   | 2238.1 | 2561   | 3364.1 | 3316.2 | 2682.4 | 2431.3 | 2953.5 | 2706.4 | 0.588249871 | 2869.85  | 2693.4   | 176.45  | 1.065511992 | 0.652    | -1.052 |
| 160677_at   | 189.5  | 170.9  | 240.8  | 252.4  | 158.7  | 217.5  | 250.4  | 251.2  | 0.843362071 | 213.4    | 219.45   | 6.05    | 0.972431078 | 0.8696   | 1.025  |
| 160678_at   | 93.1   | 75.5   | 83.6   | 67     | 78     | 82.5   | 53.9   | 64.5   | 0.285708141 | 79.8     | 69.725   | 10.075  | 1.144496235 | 0.2831   | -1.152 |
| 160679_at   | 93     | 107.4  | 140.2  | 251.2  | 115.3  | 116.6  | 173.4  | 207.2  | 0.907371594 | 147.95   | 153.125  | 5.175   | 0.966204082 | 0.7744   | 1.082  |
| 160680_at   | 6.7    | 2.8    | 21.8   | 3.4    | 14.9   | 2.4    | 11     | 1.9    | 0.845310755 | 8.675    | 7.55     | 1.125   | 1.149006623 | 0.8324   | -1.167 |
| 160681_at   | 304.5  | 291.6  | 403    | 537.1  | 203    | 242    | 632.6  | 428.9  | 0.950576217 | 384.05   | 376.625  | 7.425   | 1.01971457  | 0.7689   | -1.096 |
| 160682_at   | 1330.8 | 972.8  | 1070.5 | 1208.4 | 1408.3 | 999.5  | 1352.4 | 1132.1 | 0.554527068 | 1145.625 | 1223.075 | 77.45   | 0.936676001 | 0.571    | 1.065  |
| 160683_at   | 1759.1 | 1872.6 | 1645   | 1713.9 | 2044.4 | 1830.7 | 1794.1 | 1940.6 | 0.083056861 | 1747.65  | 1902.45  | 154.8   | 0.918631239 | 0.07932  | 1.088  |
| 160684_at   | 459.7  | 393.2  | 544.5  | 463.8  | 402.9  | 399.1  | 311.9  | 403.7  | 0.070215812 | 465.3    | 379.4    | 85.9    | 1.226410121 | 0.069    | -1.225 |
| 160685_at   | 486.8  | 431.3  | 441.5  | 445    | 342.3  | 454.4  | 453.2  | 352.2  | 0.202978791 | 451.15   | 400.525  | 50.625  | 1.126396604 | 0.1723   | -1.135 |
| 160686_at   | 824    | 830.2  | 851.4  | 788    | 861.3  | 909.1  | 866.2  | 951.6  | 0.031334843 | 823.4    | 897.05   | 73.65   | 0.917897553 | 0.02389  | 1.089  |
| 160687_r_at | 5.4    | 8.6    | 6.6    | 5.2    | 4.6    | 11     | 6.5    | 10.8   | 0.369219747 | 6.45     | 8.225    | 1.775   | 0.784194529 | 0.4482   | 1.217  |
| 160688_at   | 1479.4 | 1489.1 | 1599.6 | 1908.9 | 1485.1 | 1298.2 | 1528.7 | 1443.5 | 0.176338233 | 1619.25  | 1438.875 | 180.375 | 1.125358353 | 0.1492   | -1.121 |
| 160689_r_at | 472.1  | 1056.6 | 512    | 431.5  | 717.7  | 216.2  | 615.3  | 433.2  | 0.531877202 | 618.05   | 495.6    | 122.45  | 1.247074253 | 0.4941   | -1.278 |
| 160690_at   | 815.2  | 534.7  | 784.6  | 689.1  | 632    | 734    | 811.7  | 564.3  | 0.815176756 | 705.9    | 685.5    | 20.4    | 1.0297593   | 0.842    | 1.026  |
| 160691_at   | 185.2  | 131.4  | 123.5  | 140    | 129.3  | 171.8  | 150.9  | 188    | 0.456029338 | 145.025  | 160      | 14.975  | 0.90640625  | 0.4346   | 1.106  |
| 160692_at   | 44.5   | 29.9   | 16.7   | 5.3    | 17.3   | 8.8    | 33.8   | 35.1   | 0.974848193 | 24.1     | 23.75    | 0.35    | 1.014736842 | 0.8563   | 1.113  |
| 160693_at   | 156.5  | 174.6  | 224.2  | 266.2  | 198.3  | 195    | 247.4  | 163.3  | 0.890410256 | 205.375  | 201      | 4.375   | 1.021766169 | 0.944    | -1.011 |
| 160694_at   | 973.6  | 915.9  | 892.1  | 701.2  | 784.1  | 809.8  | 880.3  | 759.3  | 0.387322409 | 870.7    | 808.375  | 62.325  | 1.077099119 | 0.4186   | -1.071 |
| 160695_i_at | 163.7  | 210.7  | 185.8  | 215.7  | 242.4  | 220.5  | 227.4  | 209.4  | 0.07838438  | 193.975  | 224.925  | 30.95   | 0.862398577 | 0.07347  | 1.165  |
| 160696_at   | 1127.6 | 1025.9 | 1068.4 | 950.4  | 1050.3 | 1235.7 | 1134.2 | 1066.7 | 0.212117166 | 1043.075 | 1121.725 | 78.65   | 0.929884776 | 0.2087   | 1.075  |
| 160697_at   | 130.1  | 146.5  | 165.8  | 111.6  | 121.8  | 136.5  | 109.3  | 172.6  | 0.85387036  | 138.5    | 135.05   | 3.45    | 1.025546094 | 0.8282   | -1.03  |
| 160698_s_at | 682.9  | 679.3  | 868    | 891.7  | 822.4  | 954.7  | 813.5  | 1018.4 | 0.163531919 | 780.475  | 902.25   | 121.775 | 0.865031865 | 0.1599   | 1.16   |
| 160699_at   | 282.3  | 208.8  | 375.9  | 382.3  | 320.9  | 283.7  | 319.3  | 338.3  | 0.944278876 | 312.325  | 315.55   | 3.225   | 0.98977975  | 0.809    | 1.038  |
| 160700_i_at | 360.9  | 477.9  | 499.5  | 521.3  | 325.2  | 324.4  | 320    | 381.9  | 0.030555739 | 464.9    | 337.875  | 127.025 | 1.375952645 | 0.01535  | -1.366 |
| 160701_at   | 608.6  | 697.8  | 822.3  | 713.2  | 688.6  | 564.7  | 542.2  | 729.1  | 0.257703361 | 710.475  | 631.15   | 79.325  | 1.125683277 | 0.2527   | -1.128 |
| 160702_at   | 109.9  | 125.2  | 183.2  | 304.1  | 90.9   | 118.8  | 128.6  | 148.1  | 0.276443473 | 180.6    | 121.6    | 59      | 1.485197368 | 0.2371   | -1.389 |
| 160703_at   | 556.3  | 748.1  | 796    | 733.7  | 690    | 911.2  | 594.5  | 650.1  | 0.974348427 | 708.525  | 711.45   | 2.925   | 0.995888678 | 0.9995   | 1      |
| 160704_at   | 215.2  | 249.1  | 221    | 242.1  | 252.3  | 235.5  | 252.5  | 260.8  | 0.115010472 | 231.85   | 250.275  | 18.425  | 0.926380981 | 0.1083   | 1.081  |
| 160705_at   | 3331.3 | 2396.3 | 2868.7 | 2435.8 | 1762.5 | 2115.8 | 1711.7 | 1892.1 | 0.020099339 | 2758.025 | 1870.525 | 887.5   | 1.474465725 | 0.005582 | -1.466 |
| 160706_at   | 41.1   | 27.9   | 32.8   | 32.9   | 22.9   | 44.2   | 34.8   | 36.4   | 0.868894281 | 33.675   | 34.575   | 0.9     | 0.973969631 | 0.9603   | 1.008  |
| 160707_at   | 377.4  | 336    | 375    | 424.5  | 308.9  | 369.5  | 400.7  | 305.2  | 0.321768558 | 378.225  | 346.075  | 32.15   | 1.092898938 | 0.3067   | -1.097 |
| 160708_at   | 1101.8 | 1088.2 | 930.8  | 925.7  | 1201.3 | 1018.8 | 940.2  | 982.3  | 0.76005366  | 1011.625 | 1035.65  | 24.025  | 0.976802008 | 0.7644   | 1.023  |
| 160709_at   | 226.3  | 322.9  | 264.3  | 208.4  | 319.1  | 250    | 235    | 202.7  | 0.918226732 | 255.475  | 251.7    | 3.775   | 1.014998014 | 0.9185   | -1.014 |
| 160710_at   | 533.8  | 655.7  | 800.5  | 841.4  | 834.2  | 727.9  | 1123.6 | 813.3  | 0.185917679 | 707.85   | 874.75   | 166.9   | 0.809202629 | 0.1753   | 1.239  |
| 160711_at   | 412.2  | 571.5  | 455.9  | 435.5  | 688.7  | 517.4  | 499.5  | 578.5  | 0.116533659 | 468.775  | 571.025  | 102.25  | 0.820936036 | 0.1009   | 1.218  |



|             |        |        |        |        |        |        |        |        |             |          |          |         |             |         |        |
|-------------|--------|--------|--------|--------|--------|--------|--------|--------|-------------|----------|----------|---------|-------------|---------|--------|
| 160712_r_at | 43.2   | 41.4   | 36.8   | 41.5   | 26.1   | 38.2   | 44.1   | 36.3   | 0.32100176  | 40.725   | 36.175   | 4.55    | 1.125777471 | 0.2917  | -1.144 |
| 160713_at   | 225.4  | 211.7  | 297.1  | 260.4  | 261.8  | 347.5  | 262.4  | 258.4  | 0.286376562 | 248.65   | 282.525  | 33.875  | 0.880099106 | 0.2649  | 1.137  |
| 160714_at   | 738.4  | 932.8  | 968.1  | 1179.3 | 940.4  | 869.4  | 1131.2 | 1125.9 | 0.601099606 | 954.65   | 1016.725 | 62.075  | 0.938946126 | 0.5689  | 1.073  |
| 160715_at   | 287.1  | 334.9  | 498.3  | 434.9  | 408.3  | 406.7  | 472.9  | 515.1  | 0.311077767 | 388.8    | 450.75   | 61.95   | 0.862562396 | 0.273   | 1.18   |
| 160716_at   | 381.6  | 333.9  | 406.2  | 325.2  | 248.6  | 299.3  | 303.8  | 311.4  | 0.02816788  | 361.725  | 290.775  | 70.95   | 1.244003095 | 0.02598 | -1.243 |
| 160717_at   | 679    | 739    | 664.2  | 779    | 792.6  | 759.1  | 623    | 710.5  | 0.899799468 | 715.3    | 721.3    | 6       | 0.991681686 | 0.9241  | 1.006  |
| 160718_at   | 786.5  | 666.6  | 1068.2 | 968.7  | 869.7  | 962    | 982.1  | 1019.7 | 0.422848093 | 872.5    | 958.375  | 85.875  | 0.9103952   | 0.3655  | 1.115  |
| 160719_at   | 373.9  | 303.4  | 408.6  | 437.5  | 378.5  | 510.8  | 342.4  | 454.9  | 0.426715886 | 380.85   | 421.65   | 40.8    | 0.903237282 | 0.4415  | 1.104  |
| 160720_at   | 23.4   | 1.3    | 3.6    | 24.3   | 17.5   | 31.8   | 15     | 27.9   | 0.236772049 | 13.15    | 23.05    | 9.9     | 0.570498915 | 0.1842  | 3.049  |
| 160721_at   | 32.7   | 27.7   | 78.6   | 85.8   | 36.5   | 42.3   | 66.7   | 68.2   | 0.878592152 | 56.2     | 53.425   | 2.775   | 1.051941975 | 0.9179  | 1.036  |
| 160722_at   | 309.4  | 263.4  | 258.7  | 203.7  | 246    | 201.6  | 218.7  | 215.5  | 0.177488129 | 258.8    | 220.45   | 38.35   | 1.17396235  | 0.1629  | -1.164 |
| 160723_at   | 580.8  | 702.6  | 578    | 575.1  | 683.9  | 546.6  | 528.1  | 591.3  | 0.659489047 | 609.125  | 587.475  | 21.65   | 1.036852632 | 0.6361  | -1.038 |
| 160724_at   | 361.1  | 331.9  | 423.5  | 298.3  | 400.2  | 258.2  | 378.3  | 381.3  | 0.985426946 | 353.7    | 354.5    | 0.8     | 0.9977433   | 0.9758  | 1.004  |
| 160725_at   | 164    | 185.3  | 329.5  | 247.6  | 338.2  | 250.7  | 281.9  | 293.4  | 0.218116638 | 231.6    | 291.05   | 59.45   | 0.795739564 | 0.1724  | 1.297  |
| 160726_at   | 425.3  | 512.4  | 725.5  | 760.7  | 399.7  | 411.5  | 517.2  | 591.3  | 0.238109192 | 605.975  | 479.925  | 126.05  | 1.262645205 | 0.2431  | -1.244 |
| 160727_at   | 1525.9 | 1659.6 | 1708.5 | 1779.8 | 1441.9 | 1532.9 | 1739.8 | 1522.5 | 0.238094468 | 1668.45  | 1559.275 | 109.175 | 1.070016514 | 0.2311  | -1.071 |
| 160728_r_at | 1.2    | 7.3    | 12.5   | 11.1   | 6.9    | 20.9   | 18.2   | 0.7    | 0.530408404 | 8.025    | 11.675   | 3.65    | 0.687366167 | 0.93    | 1.092  |
| 160729_f_at | 43.8   | 65.3   | 43.8   | 62.7   | 60.7   | 51.3   | 33.5   | 34.4   | 0.353300975 | 53.9     | 44.975   | 8.925   | 1.19844358  | 0.3271  | -1.217 |
| 160730_at   | 569.1  | 478.1  | 355.6  | 310.8  | 439.8  | 368.7  | 454    | 351.1  | 0.7157342   | 428.4    | 403.4    | 25      | 1.061973228 | 0.8109  | -1.039 |
| 160731_at   | 202.9  | 168.7  | 122.3  | 187.8  | 156.7  | 233    | 154.3  | 172.9  | 0.740758175 | 170.425  | 179.225  | 8.8     | 0.950899707 | 0.7272  | 1.055  |
| 160732_at   | 224.7  | 289.4  | 226.4  | 309    | 257.5  | 269.7  | 254.1  | 391.8  | 0.468000387 | 262.375  | 293.275  | 30.9    | 0.894638138 | 0.4575  | 1.11   |
| 160733_at   | 57.3   | 24.1   | 11.1   | 25.6   | 18.8   | 32.7   | 10.6   | 10.1   | 0.354129457 | 29.525   | 18.05    | 11.475  | 1.635734072 | 0.3476  | -1.557 |
| 160734_at   | 2305.6 | 2267.4 | 2421.6 | 2649.8 | 1701.9 | 1785.8 | 1661.3 | 1869.4 | 0.00152689  | 2411.1   | 1754.6   | 656.5   | 1.374159353 | 0.00035 | -1.373 |
| 160735_at   | 523.3  | 417.1  | 316.2  | 438.7  | 428.1  | 530.8  | 376    | 416    | 0.805417962 | 423.825  | 437.725  | 13.9    | 0.968244903 | 0.7633  | 1.041  |
| 160736_at   | 140.4  | 111.4  | 124.3  | 136.8  | 118.6  | 116.5  | 149.1  | 124.7  | 0.923481399 | 128.225  | 127.225  | 1       | 1.00786009  | 0.9149  | 1.009  |
| 160737_at   | 294.9  | 220    | 292.3  | 322.9  | 245.2  | 268.4  | 287.6  | 276.9  | 0.613193917 | 282.525  | 269.525  | 13      | 1.048233003 | 0.6806  | -1.04  |
| 160738_at   | 278.4  | 209.8  | 354.3  | 315.1  | 295.6  | 270.6  | 219.3  | 289.1  | 0.583132273 | 289.4    | 268.65   | 20.75   | 1.077238042 | 0.6489  | -1.065 |
| 160739_at   | 85.3   | 73.8   | 70.9   | 292.7  | 45.8   | 61.4   | 231.1  | 166.2  | 0.950194568 | 130.675  | 126.125  | 4.55    | 1.036075322 | 0.9295  | -1.049 |
| 160740_at   | 212.3  | 213.9  | 194.5  | 189.8  | 167.7  | 202.4  | 161.7  | 163    | 0.051804867 | 202.625  | 173.7    | 28.925  | 1.16652274  | 0.04215 | -1.17  |
| 160741_at   | 292.5  | 209    | 260.8  | 312.3  | 253.2  | 298    | 296.5  | 244    | 0.878642483 | 268.65   | 272.925  | 4.275   | 0.984336356 | 0.83    | 1.023  |
| 160742_at   | 497.7  | 504.1  | 596.4  | 456.4  | 511.9  | 485.1  | 504.2  | 436.6  | 0.431915686 | 513.65   | 484.45   | 29.2    | 1.060274538 | 0.4336  | -1.057 |
| 160743_at   | 848.6  | 729.3  | 887.9  | 844.2  | 866.8  | 1051.5 | 939.5  | 778.3  | 0.280326253 | 827.5    | 909.025  | 81.525  | 0.910315998 | 0.2818  | 1.095  |
| 160744_r_at | 27.9   | 48.3   | 71.4   | 99.7   | 41.7   | 62     | 195.7  | 163.9  | 0.256284567 | 61.825   | 115.825  | 54      | 0.533779409 | 0.2889  | 1.715  |
| 160745_at   | 264.7  | 277    | 262.2  | 363.4  | 287.6  | 108.1  | 267.8  | 220.8  | 0.192387992 | 291.825  | 221.075  | 70.75   | 1.32002714  | 0.2082  | -1.396 |
| 160746_at   | 160.6  | 179.4  | 202    | 204    | 165.9  | 142.8  | 154    | 177.5  | 0.087124589 | 186.5    | 160.05   | 26.45   | 1.165260856 | 0.08445 | -1.164 |
| 160747_at   | 813.9  | 834.9  | 782.2  | 949.1  | 623.5  | 1011.2 | 747.4  | 785.5  | 0.580109788 | 845.025  | 791.9    | 53.125  | 1.067085491 | 0.5008  | -1.081 |
| 160748_at   | 222.2  | 78.2   | 218.1  | 221.6  | 131.5  | 96.3   | 186.5  | 217.4  | 0.568817226 | 185.025  | 157.925  | 27.1    | 1.171600443 | 0.7109  | -1.131 |
| 160749_at   | 335.4  | 404.5  | 352    | 351.5  | 415.2  | 441.5  | 314.5  | 329.7  | 0.698637057 | 360.85   | 375.225  | 14.375  | 0.961689653 | 0.7497  | 1.032  |
| 160750_at   | 626.9  | 669.2  | 594.8  | 700.1  | 604.8  | 480.4  | 602.6  | 655.4  | 0.216252757 | 647.75   | 585.8    | 61.95   | 1.105752817 | 0.2152  | -1.111 |
| 160751_i_at | 568.6  | 562    | 496.6  | 492.5  | 538.4  | 649.8  | 678.9  | 582    | 0.08076947  | 529.925  | 612.275  | 82.35   | 0.865501613 | 0.07185 | 1.153  |
| 160752_at   | 50.5   | 75.1   | 76.3   | 76.1   | 100.6  | 76.2   | 90.3   | 87     | 0.059116906 | 69.5     | 88.525   | 19.025  | 0.785088958 | 0.07427 | 1.286  |
| 160753_at   | 25.8   | 38.3   | 28.2   | 50.2   | 62.7   | 52.9   | 35.1   | 76.1   | 0.093896354 | 35.625   | 56.7     | 21.075  | 0.628306878 | 0.08508 | 1.586  |
| 160754_at   | 308.7  | 281.8  | 304.8  | 360.5  | 284    | 303.4  | 318.3  | 366    | 0.87456001  | 313.95   | 317.925  | 3.975   | 0.987497051 | 0.8741  | 1.012  |
| 160755_at   | 805.4  | 686.2  | 850.4  | 1021.1 | 778.6  | 699.6  | 986.9  | 892.6  | 0.988987643 | 840.775  | 839.425  | 1.35    | 1.001608244 | 1       | 1      |
| 160756_at   | 1266.3 | 1228.2 | 1155.6 | 887.9  | 1087.3 | 1195.8 | 886.7  | 1059.8 | 0.499132924 | 1134.5   | 1057.4   | 77.1    | 1.072914696 | 0.5378  | -1.069 |
| 160757_at   | 469.8  | 430.5  | 698.6  | 919.3  | 517.9  | 369.2  | 678.3  | 816.5  | 0.826999112 | 629.55   | 595.475  | 34.075  | 1.057223225 | 0.8431  | -1.052 |
| 160758_at   | 551.1  | 631    | 820    | 751.1  | 683.2  | 651.1  | 700.7  | 695.4  | 0.931265091 | 688.3    | 682.6    | 5.7     | 1.008350425 | 0.975   | 1.003  |
| 160759_at   | 1448.9 | 1149.9 | 1058.8 | 853.1  | 1177.8 | 1272.2 | 852.9  | 961.2  | 0.708659023 | 1127.675 | 1066.025 | 61.65   | 1.057831664 | 0.7343  | -1.052 |
| 160760_at   | 515    | 484.8  | 457.6  | 500.4  | 493.3  | 565.3  | 516.8  | 707.5  | 0.188840481 | 489.45   | 570.725  | 81.275  | 0.857593412 | 0.1359  | 1.156  |
| 160761_at   | 185.5  | 268.2  | 195.2  | 208.1  | 288.8  | 251.6  | 179.8  | 228.5  | 0.466455652 | 214.25   | 237.175  | 22.925  | 0.903341415 | 0.4778  | 1.103  |
| 160762_at   | 225.5  | 196.1  | 260.4  | 281    | 214.5  | 208.5  | 290    | 292.2  | 0.735098706 | 240.75   | 251.3    | 10.55   | 0.958018305 | 0.7569  | 1.04   |
| 160763_at   | 5.4    | 15.3   | 7      | 3.8    | 15.4   | 6.5    | 2.7    | 8.5    | 0.917288046 | 7.875    | 8.275    | 0.4     | 0.951661631 | 0.9778  | 1.014  |
| 160764_at   | 770.8  | 874.3  | 1086   | 1078   | 850.2  | 745.1  | 853.6  | 842.3  | 0.196254244 | 952.275  | 822.8    | 129.475 | 1.157359018 | 0.1777  | -1.147 |
| 160765_at   | 600    | 559.8  | 527.2  | 425.1  | 653.8  | 650.6  | 441.6  | 510.2  | 0.599902223 | 528.025  | 564.05   | 36.025  | 0.936131549 | 0.6375  | 1.062  |
| 160766_at   | 163.8  | 128.8  | 182.3  | 151.1  | 101.5  | 177.1  | 182.1  | 184.7  | 0.841458114 | 156.5    | 161.35   | 4.85    | 0.969941122 | 0.9527  | 1.01   |
| 160767_at   | 575.5  | 289.3  | 441.3  | 592.6  | 422.5  | 361.3  | 520.9  | 446.7  | 0.659211568 | 474.675  | 437.85   | 36.825  | 1.084104145 | 0.7898  | -1.052 |



|             |        |        |        |        |        |        |        |        |             |          |          |         |             |          |        |
|-------------|--------|--------|--------|--------|--------|--------|--------|--------|-------------|----------|----------|---------|-------------|----------|--------|
| 160768_at   | 719    | 638.4  | 664    | 845.5  | 735.7  | 511.3  | 459.2  | 855.1  | 0.500584137 | 716.725  | 640.325  | 76.4    | 1.119314411 | 0.4172   | -1.149 |
| 160769_at   | 222.8  | 257.2  | 300.9  | 277.3  | 321.2  | 338.3  | 409    | 368.6  | 0.010120092 | 264.55   | 359.275  | 94.725  | 0.736344026 | 0.009944 | 1.361  |
| 160770_at   | 267.3  | 252.2  | 246.5  | 227.4  | 223.7  | 208.8  | 225.8  | 267    | 0.304749743 | 248.35   | 231.325  | 17.025  | 1.073597752 | 0.2804   | -1.076 |
| 160771_r_at | 129.4  | 89.6   | 84.2   | 53     | 86.3   | 122.4  | 76.7   | 71.5   | 0.993132768 | 89.05    | 89.225   | 0.175   | 0.998038666 | 0.9017   | 1.029  |
| 160772_i_at | 890.2  | 794.2  | 914.9  | 675.6  | 989.7  | 867    | 870.2  | 755    | 0.502341887 | 818.725  | 870.475  | 51.75   | 0.9405497   | 0.4986   | 1.066  |
| 160773_at   | 362.7  | 311.7  | 375.9  | 441.1  | 314.6  | 332.4  | 452.5  | 326.1  | 0.708121423 | 372.85   | 356.4    | 16.45   | 1.046156004 | 0.6742   | -1.05  |
| 160774_at   | 73.7   | 76.3   | 68.2   | 67.3   | 68.2   | 70.4   | 81.7   | 68.8   | 0.823696211 | 71.375   | 72.275   | 0.9     | 0.987547561 | 0.8359   | 1.011  |
| 160775_at   | 860.9  | 927.1  | 1217.1 | 1492.6 | 1025.6 | 965.1  | 1296.7 | 1296.7 | 0.903677614 | 1124.425 | 1146.025 | 21.6    | 0.981152244 | 0.8242   | 1.035  |
| 160776_at   | 438.1  | 418.3  | 470.4  | 449.6  | 461.9  | 428.3  | 413.1  | 525.1  | 0.656255469 | 444.1    | 457.1    | 13      | 0.971559834 | 0.6784   | -1.026 |
| 160777_at   | 276.2  | 247.2  | 382.2  | 387.3  | 262.3  | 217.3  | 274    | 321.6  | 0.252045776 | 323.225  | 268.8    | 54.425  | 1.202473958 | 0.2572   | -1.191 |
| 160778_at   | 330    | 396.4  | 313.7  | 420    | 230.9  | 529.1  | 359.4  | 364.2  | 0.933579094 | 365.025  | 370.9    | 5.875   | 0.984160151 | 0.9221   | 1.019  |
| 160779_at   | 1783.8 | 1403.5 | 1512.1 | 1351.7 | 1484.9 | 1550.6 | 1364.5 | 1394.4 | 0.57420273  | 1512.775 | 1448.6   | 64.175  | 1.044301394 | 0.5891   | -1.04  |
| 160780_at   | 222.9  | 265.3  | 411.4  | 372.8  | 282.5  | 410.8  | 304    | 270.2  | 0.98292535  | 318.1    | 316.875  | 1.225   | 1.003865878 | 0.9443   | 1.013  |
| 160781_r_at | 73.3   | 58.8   | 65.8   | 37.7   | 62.1   | 65.7   | 52.3   | 61.8   | 0.857109038 | 58.9     | 60.475   | 1.575   | 0.97395618  | 0.7437   | 1.054  |
| 160782_at   | 599.7  | 487.5  | 631.5  | 452.1  | 548.2  | 603.3  | 542.6  | 489.3  | 0.951513782 | 542.7    | 545.85   | 3.15    | 0.994229184 | 0.894    | 1.013  |
| 160783_at   | 283.5  | 302.7  | 322.8  | 385.8  | 428.2  | 359.6  | 329.4  | 461.9  | 0.112863809 | 323.7    | 394.775  | 71.075  | 0.819960737 | 0.1031   | 1.217  |
| 160784_r_at | 65.1   | 96.5   | 93.2   | 118.4  | 94     | 96.8   | 154.4  | 93.7   | 0.411500791 | 93.3     | 109.725  | 16.425  | 0.850307587 | 0.393    | 1.174  |
| 160785_at   | 519.4  | 636    | 670    | 804.7  | 720.8  | 513.7  | 846.9  | 815.9  | 0.511367886 | 657.525  | 724.325  | 66.8    | 0.907776205 | 0.5557   | 1.095  |
| 160786_f_at | 44.1   | 49.8   | 75.8   | 22.3   | 32.2   | 45.8   | 75.3   | 53.4   | 0.805035572 | 48       | 51.675   | 3.675   | 0.928882438 | 0.7181   | 1.124  |
| 160787_at   | 392.5  | 472.9  | 475.4  | 457.4  | 317    | 253.8  | 401.5  | 409.3  | 0.05999354  | 449.55   | 345.4    | 104.15  | 1.301534453 | 0.0612   | -1.322 |
| 160788_at   | 511.6  | 498.3  | 488.6  | 451.4  | 539.9  | 528    | 477.3  | 445.3  | 0.708609959 | 487.475  | 497.625  | 10.15   | 0.979603115 | 0.7338   | 1.019  |
| 160789_at   | 563.1  | 487.7  | 543.3  | 542.5  | 462.6  | 500.9  | 429    | 496.7  | 0.038019087 | 534.15   | 472.3    | 61.85   | 1.130954902 | 0.04114  | -1.131 |
| 160790_s_at | 245.1  | 277.9  | 343.5  | 258.1  | 279.2  | 220.6  | 317.8  | 303.1  | 0.975598055 | 281.15   | 280.175  | 0.975   | 1.003479968 | 0.9692   | 1.004  |
| 160791_at   | 311.7  | 369.3  | 517.6  | 446.7  | 437.2  | 374.3  | 512.2  | 518.1  | 0.419712218 | 411.325  | 460.45   | 49.125  | 0.893310892 | 0.3984   | 1.13   |
| 160792_at   | 1252.7 | 1230.8 | 1008.8 | 1026.4 | 1033.1 | 1121.8 | 1072.2 | 1084.9 | 0.492552561 | 1129.675 | 1078     | 51.675  | 1.047935993 | 0.5083   | -1.043 |
| 160793_at   | 116.7  | 115.7  | 140.4  | 163.4  | 124.8  | 165.4  | 132    | 172.4  | 0.407863365 | 134.05   | 148.65   | 14.6    | 0.901782711 | 0.402    | 1.11   |
| 160794_at   | 609    | 810.7  | 375.8  | 281.2  | 570.9  | 310.9  | 280.7  | 315.6  | 0.326777288 | 519.175  | 369.525  | 149.65  | 1.404979365 | 0.3365   | -1.35  |
| 160795_at   | 279.9  | 254.6  | 266.7  | 366.3  | 184.2  | 168.7  | 195.5  | 212.4  | 0.021701761 | 291.875  | 190.2    | 101.675 | 1.534568875 | 0.004371 | -1.524 |
| 160796_at   | 19.5   | 14.7   | 13.8   | 11.9   | 9.7    | 57.6   | 14.9   | 12.8   | 0.497184712 | 14.975   | 23.75    | 8.775   | 0.630526316 | 0.6394   | 1.224  |
| 160797_r_at | 54.8   | 11.8   | 29.1   | 21     | 21.2   | 64.1   | 32.3   | 36     | 0.504239038 | 29.175   | 38.4     | 9.225   | 0.759765625 | 0.4102   | 1.417  |
| 160798_at   | 108.7  | 176.7  | 116.7  | 126    | 172.3  | 170.6  | 114    | 139.7  | 0.43958201  | 132.025  | 149.15   | 17.125  | 0.885182702 | 0.4185   | 1.135  |
| 160799_at   | 10.6   | 14.9   | 51.7   | 9.8    | 9.7    | 49.6   | 6.8    | 8.7    | 0.839279882 | 21.75    | 18.7     | 3.05    | 1.163101604 | 0.6727   | -1.302 |
| 160800_at   | 863.6  | 1032.2 | 1150.8 | 905.3  | 1194   | 1058.5 | 815.8  | 949.8  | 0.878260726 | 987.975  | 1004.525 | 16.55   | 0.983524551 | 0.9024   | 1.013  |
| 160801_at   | 613    | 626.4  | 701.9  | 597.7  | 1401.1 | 1245.2 | 904.3  | 1186   | 0.011072504 | 634.75   | 1184.15  | 549.4   | 0.536038509 | 0.000825 | 1.846  |
| 160802_at   | 313    | 305.2  | 245.4  | 239.5  | 287.8  | 241.5  | 216.6  | 230.7  | 0.250525847 | 275.775  | 244.15   | 31.625  | 1.129531026 | 0.2453   | -1.127 |
| 160803_at   | 216.9  | 285.8  | 271.6  | 272.5  | 429.3  | 264.2  | 259.5  | 309.9  | 0.273414226 | 261.7    | 315.725  | 54.025  | 0.828885898 | 0.2408   | 1.187  |
| 160804_at   | 412    | 287.4  | 445    | 374.7  | 352.5  | 348.1  | 501.9  | 402.8  | 0.677459622 | 379.775  | 401.325  | 21.55   | 0.946302872 | 0.6711   | 1.059  |
| 160805_s_at | 882.9  | 951.1  | 827    | 775.8  | 985.8  | 1086.3 | 741.1  | 907.4  | 0.430789581 | 859.2    | 930.15   | 70.95   | 0.92372198  | 0.4618   | 1.075  |
| 160806_at   | 280.5  | 301.3  | 478.2  | 393.1  | 323.7  | 370.9  | 447.2  | 413.6  | 0.648793044 | 363.275  | 388.85   | 25.575  | 0.934229137 | 0.5759   | 1.087  |
| 160807_at   | 358.1  | 389.6  | 449.1  | 390.7  | 415    | 497.7  | 423    | 469.5  | 0.093028918 | 396.875  | 451.3    | 54.425  | 0.879403944 | 0.08938  | 1.138  |
| 160808_at   | 395.1  | 350.3  | 382.4  | 356    | 330.4  | 409    | 329.8  | 341.3  | 0.440393819 | 370.95   | 352.625  | 18.325  | 1.051967387 | 0.3982   | -1.055 |
| 160809_at   | 257    | 303.6  | 387.9  | 487.4  | 334.6  | 264.2  | 413.1  | 367.9  | 0.82322198  | 358.975  | 344.95   | 14.025  | 1.040658066 | 0.8946   | -1.024 |
| 160810_r_at | 52.8   | 155.6  | 130.2  | 64.8   | 116    | 74     | 82.6   | 91.3   | 0.729751504 | 100.85   | 90.975   | 9.875   | 1.108546304 | 0.9534   | 1.017  |
| 160811_at   | 358.7  | 645.1  | 546.2  | 625.8  | 560.8  | 306.3  | 585    | 659.6  | 0.879090905 | 543.95   | 527.925  | 16.025  | 1.030354691 | 0.8463   | -1.045 |
| 160812_at   | 834    | 787.3  | 1052.4 | 1245.5 | 793.9  | 841.4  | 1046.5 | 1168   | 0.903779489 | 979.8    | 962.45   | 17.35   | 1.01802691  | 0.9279   | 1.013  |
| 160813_r_at | 63.5   | 29     | 51.9   | 70.6   | 53.2   | 78.4   | 56.2   | 76.6   | 0.318502302 | 53.75    | 66.1     | 12.35   | 0.813161876 | 0.3141   | 1.277  |
| 160814_at   | 1598.3 | 1474.3 | 1373   | 1217.8 | 1141.8 | 1045.3 | 996.2  | 1057.9 | 0.015781411 | 1415.85  | 1060.3   | 355.55  | 1.335329624 | 0.00434  | -1.33  |
| 160815_at   | 74.5   | 90.9   | 69     | 88.2   | 121.1  | 100.5  | 73.5   | 94.5   | 0.197465528 | 80.65    | 97.4     | 16.75   | 0.828028747 | 0.1928   | 1.197  |
| 160816_at   | 64.4   | 47.9   | 76.3   | 80.7   | 32.1   | 19.3   | 87.5   | 50.2   | 0.28680681  | 67.325   | 47.275   | 20.05   | 1.424114225 | 0.2062   | -1.625 |
| 160817_at   | 13.1   | 22.1   | 7.5    | 7.1    | 7.2    | 13.6   | 11.5   | 12     | 0.733167579 | 12.45    | 11.075   | 1.375   | 1.124153499 | 0.9143   | -1.034 |
| 160818_at   | 274.4  | 292.4  | 227.5  | 191.4  | 216.2  | 207.5  | 214.2  | 223.6  | 0.268454356 | 246.425  | 215.375  | 31.05   | 1.14416715  | 0.257    | -1.129 |
| 160819_at   | 424.9  | 512.8  | 597.4  | 638.6  | 575.7  | 600.3  | 587.1  | 760.6  | 0.22308339  | 543.425  | 630.925  | 87.5    | 0.861314736 | 0.2146   | 1.167  |
| 160820_at   | 759.3  | 771.1  | 850.3  | 870.2  | 922    | 1016.4 | 707.6  | 843.3  | 0.447905199 | 812.725  | 872.325  | 59.6    | 0.931676841 | 0.4776   | 1.066  |
| 160821_r_at | 1103.9 | 913.6  | 303.6  | 437.7  | 930.1  | 907.8  | 348.8  | 550.7  | 0.982793467 | 689.7    | 684.35   | 5.35    | 1.007817637 | 0.9051   | 1.049  |
| 160822_at   | 607.7  | 520.3  | 686.9  | 763.4  | 776.8  | 541.1  | 526.3  | 772.4  | 0.916242793 | 644.575  | 654.15   | 9.575   | 0.985362684 | 0.9574   | 1.008  |
| 160823_at   | 549.2  | 518.6  | 626.5  | 533    | 639.7  | 533.3  | 629    | 538.8  | 0.476185254 | 556.825  | 585.2    | 28.375  | 0.951512303 | 0.4768   | 1.05   |



|             |        |        |        |        |        |        |        |        |             |          |          |         |             |          |        |
|-------------|--------|--------|--------|--------|--------|--------|--------|--------|-------------|----------|----------|---------|-------------|----------|--------|
| 160824_at   | 113.4  | 161.5  | 245.2  | 320.5  | 199.5  | 92.6   | 252.2  | 254    | 0.864707978 | 210.15   | 199.575  | 10.575  | 1.052987599 | 0.8866   | -1.05  |
| 160825_at   | 589.3  | 408.5  | 499.6  | 547.5  | 491.1  | 475.9  | 547    | 580.3  | 0.798207865 | 511.225  | 523.575  | 12.35   | 0.976412166 | 0.7567   | 1.03   |
| 160826_at   | 174.8  | 250.8  | 218.9  | 293.2  | 264.7  | 164.2  | 231.5  | 321.9  | 0.797148306 | 234.425  | 245.575  | 11.15   | 0.954596355 | 0.8507   | 1.036  |
| 160827_at   | 716.7  | 966.5  | 816.7  | 919.9  | 1072.4 | 641.6  | 840.9  | 825.7  | 0.928792055 | 854.95   | 845.15   | 9.8     | 1.011595575 | 0.869    | 1.022  |
| 160828_at   | 667.1  | 692.9  | 1141.5 | 1373.8 | 762.9  | 580.8  | 902.3  | 1021.7 | 0.479434355 | 968.825  | 816.925  | 151.9   | 1.185941182 | 0.535    | -1.154 |
| 160829_at   | 94.8   | 142    | 187.5  | 176.2  | 132.3  | 108.4  | 178.6  | 128.2  | 0.624891322 | 150.125  | 136.875  | 13.25   | 1.096803653 | 0.6979   | -1.079 |
| 160830_at   | 95.3   | 146.3  | 188.3  | 173.8  | 197.5  | 211.3  | 151.2  | 145.1  | 0.374272325 | 150.925  | 176.275  | 25.35   | 0.856190611 | 0.3679   | 1.19   |
| 160831_at   | 110.3  | 114.9  | 130.2  | 133.1  | 113.8  | 98.7   | 145.7  | 151.5  | 0.720838099 | 122.125  | 127.425  | 5.3     | 0.958406906 | 0.7966   | 1.031  |
| 160832_at   | 488.4  | 380.3  | 446.3  | 507.1  | 444.8  | 464.5  | 581    | 549.3  | 0.255908305 | 455.525  | 509.9    | 54.375  | 0.893361443 | 0.2613   | 1.119  |
| 160833_at   | 140.4  | 141.5  | 157.3  | 200.8  | 139.5  | 119.1  | 134.1  | 189.2  | 0.51044077  | 160      | 145.475  | 14.525  | 1.099845334 | 0.4712   | -1.104 |
| 160834_at   | 330.3  | 354.4  | 244.8  | 253    | 353.5  | 297    | 283.3  | 404.4  | 0.357753179 | 295.625  | 334.55   | 38.925  | 0.883649679 | 0.3469   | 1.135  |
| 160835_i_at | 236.6  | 335.9  | 259.1  | 221.2  | 265.9  | 262.3  | 211.1  | 299.7  | 0.916268697 | 263.2    | 259.75   | 3.45    | 1.013282002 | 0.9482   | 1.008  |
| 160836_at   | 217.4  | 106.9  | 218.3  | 376.1  | 213.4  | 154.9  | 144.7  | 203.4  | 0.437705199 | 229.675  | 179.1    | 50.575  | 1.282384143 | 0.5633   | -1.184 |
| 160837_at   | 369.6  | 306.3  | 382.1  | 397.6  | 263.8  | 440.5  | 321.8  | 277.8  | 0.44123205  | 363.9    | 325.975  | 37.925  | 1.116343278 | 0.3663   | -1.134 |
| 160838_at   | 139.5  | 194.4  | 161.7  | 174    | 190.3  | 187.8  | 177.8  | 221.4  | 0.121759499 | 167.4    | 194.325  | 26.925  | 0.861443458 | 0.1181   | 1.165  |
| 160839_at   | 46.1   | 71.8   | 13.7   | 88.9   | 68.7   | 84.2   | 58.1   | 62.6   | 0.489519683 | 55.125   | 68.4     | 13.275  | 0.805921053 | 0.3691   | 1.511  |
| 160840_at   | 312    | 363.8  | 443.3  | 484.4  | 390.7  | 280.9  | 557.8  | 365.2  | 0.975742008 | 400.875  | 398.65   | 2.225   | 1.005581337 | 0.9045   | -1.022 |
| 160841_at   | 105.3  | 132.8  | 130.4  | 180.6  | 107.4  | 42.9   | 97.7   | 152.1  | 0.228076064 | 137.275  | 100.025  | 37.25   | 1.372406898 | 0.2245   | -1.481 |
| 160842_at   | 195.1  | 209.6  | 176.9  | 235.7  | 285.5  | 148.6  | 215    | 243    | 0.58175433  | 204.325  | 223.025  | 18.7    | 0.916152898 | 0.6795   | 1.068  |
| 160843_at   | 355.3  | 296.9  | 607.1  | 702    | 158.2  | 245    | 676.8  | 510.8  | 0.570963892 | 490.325  | 397.7    | 92.625  | 1.232901685 | 0.4697   | -1.353 |
| 160844_at   | 409.6  | 496.9  | 417.3  | 356.1  | 472.6  | 423    | 473.6  | 451.6  | 0.324574743 | 419.975  | 455.2    | 35.225  | 0.922616432 | 0.2821   | 1.09   |
| 160845_at   | 679.6  | 652.8  | 707.3  | 555    | 633.8  | 736.3  | 620.9  | 550.2  | 0.800909991 | 648.675  | 635.3    | 13.375  | 1.021053046 | 0.7913   | -1.022 |
| 160846_at   | 404.5  | 367.7  | 376.3  | 383    | 395.8  | 355    | 447.3  | 440.5  | 0.310463157 | 382.875  | 409.65   | 26.775  | 0.934639326 | 0.3081   | 1.066  |
| 160847_at   | 1515.3 | 1218.9 | 1522.7 | 1502.2 | 1689.9 | 1719.1 | 1979.5 | 1571   | 0.038985458 | 1439.775 | 1739.875 | 300.1   | 0.827516345 | 0.03976  | 1.209  |
| 160848_at   | 971.2  | 926.6  | 1064.4 | 1079.8 | 1038.4 | 1078   | 1428.7 | 1076.3 | 0.21708931  | 1010.5   | 1155.35  | 144.85  | 0.874626736 | 0.1749   | 1.136  |
| 160849_at   | 778.3  | 709.7  | 782    | 857    | 739.9  | 750.6  | 711.6  | 1058.3 | 0.721512587 | 781.75   | 815.1    | 33.35   | 0.959084775 | 0.7703   | 1.031  |
| 160850_at   | 965.7  | 813.6  | 858.7  | 915.7  | 800    | 835.4  | 882.9  | 872.2  | 0.336089976 | 888.425  | 847.625  | 40.8    | 1.048134493 | 0.3351   | -1.047 |
| 160851_r_at | 199.8  | 162.7  | 149.9  | 196    | 112.2  | 259.4  | 146.1  | 129    | 0.687463313 | 177.1    | 161.675  | 15.425  | 1.095407453 | 0.5081   | -1.149 |
| 160852_at   | 4.5    | 3.4    | 2.3    | 2.3    | 2.4    | 4.4    | 2.3    | 5.5    | 0.601048329 | 3.125    | 3.65     | 0.525   | 0.856164384 | 0.6657   | 1.13   |
| 160853_at   | 741    | 535.1  | 748.8  | 473.3  | 933.9  | 565.3  | 728.7  | 562.1  | 0.542630872 | 624.55   | 697.5    | 72.95   | 0.895412186 | 0.5441   | 1.114  |
| 160854_at   | 227.8  | 249.4  | 261.9  | 343.6  | 216.5  | 210.9  | 367.5  | 280.5  | 0.968702257 | 270.675  | 268.85   | 1.825   | 1.006788172 | 0.8993   | -1.021 |
| 160855_at   | 6.6    | 10     | 2.3    | 6.8    | 2.8    | 18.5   | 4.5    | 3      | 0.859323301 | 6.425    | 7.2      | 0.775   | 0.892361111 | 0.8713   | -1.095 |
| 160856_at   | 354.6  | 363.8  | 425.1  | 435.5  | 305.9  | 334.1  | 367    | 397    | 0.177585649 | 394.75   | 351      | 43.75   | 1.124643875 | 0.1774   | -1.125 |
| 160857_at   | 186.4  | 257.9  | 308.7  | 388.3  | 233.5  | 214.1  | 310.7  | 372.3  | 0.963484393 | 285.325  | 282.65   | 2.675   | 1.009464001 | 0.9963   | 1.001  |
| 160858_at   | 504.5  | 309.7  | 398.2  | 305.4  | 467.1  | 632.7  | 283    | 325.6  | 0.626648054 | 379.45   | 427.1    | 47.65   | 0.888433622 | 0.693    | 1.094  |
| 160859_s_at | 745.6  | 743.9  | 1002.8 | 1015.7 | 873.8  | 741.5  | 1075.6 | 1059.5 | 0.60317485  | 877      | 937.6    | 60.6    | 0.935366894 | 0.6099   | 1.069  |
| 160860_at   | 99.6   | 151.9  | 130.8  | 268.4  | 101.5  | 166.8  | 291.9  | 261.1  | 0.484277932 | 162.675  | 205.325  | 42.65   | 0.792280531 | 0.5131   | 1.248  |
| 160861_s_at | 69.5   | 101.5  | 114.9  | 97.7   | 115.9  | 120.9  | 148.9  | 107    | 0.083483768 | 95.9     | 123.175  | 27.275  | 0.778567079 | 0.09085  | 1.296  |
| 160862_at   | 418.2  | 450.5  | 547.9  | 424.3  | 415.1  | 503.9  | 365    | 401.4  | 0.391394953 | 460.225  | 421.35   | 38.875  | 1.092262964 | 0.3689   | -1.093 |
| 160863_at   | 476    | 384.3  | 392    | 429    | 204.8  | 174.7  | 160.1  | 229.6  | 0.000192893 | 420.325  | 192.3    | 228.025 | 2.185777431 | 0.000159 | -2.199 |
| 160864_at   | 294.4  | 253.9  | 249.3  | 284.8  | 295.1  | 228.2  | 283.9  | 252.7  | 0.776454596 | 270.6    | 264.975  | 5.625   | 1.021228418 | 0.7528   | -1.024 |
| 160865_at   | 40.5   | 33.1   | 14.6   | 26.1   | 30.5   | 35.9   | 41.3   | 19.7   | 0.6649793   | 28.575   | 31.85    | 3.275   | 0.897174254 | 0.629    | 1.149  |
| 160866_at   | 507.4  | 378.4  | 537.9  | 536.9  | 369.4  | 534.9  | 657.7  | 616.3  | 0.496613943 | 490.15   | 544.575  | 54.425  | 0.90005968  | 0.5723   | 1.096  |
| 160867_at   | 116.1  | 131.8  | 140.7  | 135.1  | 134.7  | 121.3  | 158.1  | 167.4  | 0.282553244 | 130.925  | 145.375  | 14.45   | 0.900601892 | 0.2852   | 1.104  |
| 160868_at   | 80.4   | 45.7   | 39.2   | 39.6   | 252.4  | 150.7  | 193.9  | 77.3   | 0.04562696  | 51.225   | 168.575  | 117.35  | 0.303870681 | 0.009278 | 3.161  |
| 160869_at   | 268.9  | 260.7  | 221.1  | 218    | 231.1  | 266.9  | 159.3  | 231.2  | 0.478863184 | 242.175  | 222.125  | 20.05   | 1.090264491 | 0.4515   | -1.104 |
| 160870_at   | 129.9  | 191.8  | 178.1  | 187.8  | 157.3  | 187.2  | 193.3  | 196.8  | 0.517352386 | 171.9    | 183.65   | 11.75   | 0.936019603 | 0.5043   | 1.077  |
| 160871_at   | 15.3   | 13.2   | 57.1   | 63.8   | 26.3   | 25.8   | 36.2   | 56.8   | 0.946742973 | 37.35    | 36.275   | 1.075   | 1.029634735 | 0.7403   | 1.172  |
| 160872_f_at | 244.8  | 232.3  | 332.9  | 264.6  | 340.5  | 317.4  | 349.3  | 330.9  | 0.055371427 | 268.65   | 334.525  | 65.875  | 0.803078993 | 0.03177  | 1.257  |
| 160873_at   | 47.8   | 19.3   | 29.8   | 43.2   | 29.1   | 50.7   | 59.9   | 29.7   | 0.49532179  | 35.025   | 42.35    | 7.325   | 0.8270366   | 0.4998   | 1.219  |
| 160874_r_at | 485    | 418.2  | 470    | 538.3  | 369.3  | 674.5  | 549.2  | 631.8  | 0.340304421 | 477.875  | 556.2    | 78.325  | 0.859178353 | 0.4022   | 1.139  |
| 160875_at   | 2416.8 | 2562   | 2083.9 | 2084.2 | 2598.9 | 2644.2 | 2076.2 | 2291.7 | 0.544186876 | 2286.725 | 2402.75  | 116.025 | 0.95171158  | 0.5513   | 1.05   |
| 160876_at   | 1011.7 | 1092.3 | 915    | 1137.8 | 1067   | 990    | 899.6  | 1196.2 | 0.990408528 | 1039.2   | 1038.2   | 1       | 1.000963206 | 0.9698   | 1.003  |
| 160877_at   | 2215.3 | 2763.7 | 2632.1 | 2365.3 | 3157.5 | 2455.5 | 3545.3 | 2555.2 | 0.198260453 | 2494.1   | 2928.375 | 434.275 | 0.851701029 | 0.1797   | 1.165  |
| 160878_at   | 564.5  | 476.9  | 533.8  | 449.7  | 512.8  | 558.6  | 413.5  | 475.3  | 0.702509799 | 506.225  | 490.05   | 16.175  | 1.033006836 | 0.6893   | -1.035 |
| 160879_at   | 93.7   | 45.5   | 65.3   | 104.7  | 57.8   | 93.9   | 91.5   | 74.3   | 0.901069913 | 77.3     | 79.375   | 2.075   | 0.973858268 | 0.7973   | 1.061  |



|             |        |        |        |        |        |        |        |        |             |          |          |         |             |          |        |
|-------------|--------|--------|--------|--------|--------|--------|--------|--------|-------------|----------|----------|---------|-------------|----------|--------|
| 160880_at   | 346.5  | 295.1  | 285.4  | 402.9  | 330.3  | 433.2  | 295.7  | 330.7  | 0.721869647 | 332.475  | 347.475  | 15      | 0.956831427 | 0.7152   | 1.044  |
| 160881_at   | 21.9   | 21.8   | 36.3   | 52.2   | 44.4   | 48.9   | 70     | 58.1   | 0.053649131 | 33.05    | 55.35    | 22.3    | 0.597109304 | 0.05158  | 1.766  |
| 160882_at   | 167.4  | 146.4  | 114.2  | 93.9   | 131.4  | 125    | 117    | 122.8  | 0.723804204 | 130.475  | 124.05   | 6.425   | 1.051793632 | 0.8432   | 1.027  |
| 160883_at   | 135.9  | 132.5  | 122.9  | 127.3  | 146.6  | 132.8  | 166.1  | 188.8  | 0.094996942 | 129.65   | 158.575  | 28.925  | 0.817594198 | 0.0509   | 1.213  |
| 160884_at   | 107.1  | 107.2  | 67.8   | 73.9   | 115.6  | 104.6  | 68.5   | 123.8  | 0.415417774 | 89       | 103.125  | 14.125  | 0.863030303 | 0.452    | 1.155  |
| 160885_at   | 1770.3 | 1910.9 | 2401.8 | 2610.3 | 2116.2 | 1772.5 | 2595.4 | 2514.6 | 0.790868865 | 2173.325 | 2249.675 | 76.35   | 0.966061764 | 0.7879   | 1.036  |
| 160886_i_at | 1.4    | 6.8    | 1.5    | 1.2    | 4.4    | 14.6   | 0.6    | 6.3    | 0.310272452 | 2.725    | 6.475    | 3.75    | 0.420849421 | 0.4198   | 1.972  |
| 160887_at   | 607.3  | 461    | 512.2  | 521.9  | 504    | 564.1  | 521.5  | 553.8  | 0.773451606 | 525.6    | 535.85   | 10.25   | 0.980871513 | 0.7233   | 1.023  |
| 160888_at   | 384.5  | 451.6  | 426    | 425.2  | 393.9  | 339.1  | 356.8  | 389.6  | 0.034894567 | 421.825  | 369.85   | 51.975  | 1.140529945 | 0.0362   | -1.141 |
| 160889_at   | 321.5  | 346.7  | 363.1  | 346    | 455.7  | 342.6  | 410.5  | 358.9  | 0.160589576 | 344.325  | 391.925  | 47.6    | 0.878548192 | 0.1251   | 1.132  |
| 160890_at   | 907.8  | 831.8  | 1082.1 | 1136.4 | 972.6  | 993.3  | 1183.1 | 1187.3 | 0.347967381 | 989.525  | 1084.075 | 94.55   | 0.912782787 | 0.3383   | 1.099  |
| 160891_at   | 37.5   | 36.1   | 26.8   | 25.3   | 26     | 42.1   | 17.5   | 24.8   | 0.555858236 | 31.425   | 27.6     | 3.825   | 1.138586957 | 0.4573   | -1.178 |
| 160892_at   | 43.9   | 75.5   | 28.5   | 59.5   | 102.4  | 86.4   | 92     | 127.2  | 0.010321176 | 51.85    | 102      | 50.15   | 0.508333333 | 0.0184   | 2.071  |
| 160893_at   | 10     | 66.1   | 35.1   | 46     | 19.7   | 7.4    | 4      | 18     | 0.099671427 | 39.3     | 12.275   | 27.025  | 3.201629328 | 0.08428  | -3.164 |
| 160894_at   | 492.1  | 631.3  | 527    | 520.1  | 847.7  | 473.7  | 570.1  | 626.2  | 0.366445328 | 542.625  | 629.425  | 86.8    | 0.862096358 | 0.3654   | 1.139  |
| 160895_at   | 313.3  | 238.1  | 265.1  | 485.8  | 338.2  | 102.1  | 215.3  | 571.2  | 0.876323461 | 325.575  | 306.7    | 18.875  | 1.061542224 | 0.6256   | -1.226 |
| 160896_at   | 1399.5 | 1766.1 | 2021.2 | 2143.3 | 2070.5 | 1656.2 | 2641   | 2332.5 | 0.247029881 | 1832.525 | 2175.05  | 342.525 | 0.842520862 | 0.262    | 1.185  |
| 160897_at   | 150.2  | 156.5  | 259.1  | 242.1  | 276.4  | 244    | 239.9  | 207.7  | 0.268425715 | 201.975  | 242      | 40.025  | 0.834607438 | 0.23     | 1.229  |
| 160898_at   | 269.7  | 329.1  | 242.7  | 317.1  | 334.1  | 317.9  | 281.4  | 362    | 0.242933177 | 289.65   | 323.85   | 34.2    | 0.894395553 | 0.2419   | 1.122  |
| 160899_at   | 36.4   | 34.6   | 34.1   | 55.5   | 101.1  | 121    | 60.1   | 81.5   | 0.023318844 | 40.15    | 90.925   | 50.775  | 0.441572725 | 0.005442 | 2.24   |
| 160900_at   | 698.4  | 732    | 683.9  | 817.6  | 842.7  | 609.4  | 719.9  | 719.7  | 0.865235216 | 732.975  | 722.925  | 10.05   | 1.013901857 | 0.8241   | -1.018 |
| 160901_at   | 90.4   | 87.7   | 154.2  | 195.4  | 104.7  | 105.7  | 143.8  | 185.3  | 0.930660247 | 131.925  | 134.875  | 2.95    | 0.978127896 | 0.8349   | 1.054  |
| 160902_at   | 25.9   | 31.1   | 51.2   | 76.5   | 49.9   | 27.3   | 65.3   | 67.9   | 0.679854398 | 46.175   | 52.6     | 6.425   | 0.877851711 | 0.6316   | 1.177  |
| 160903_at   | 228.6  | 203    | 312.3  | 244.5  | 206.9  | 219.7  | 248.3  | 190    | 0.299767048 | 247.1    | 216.225  | 30.875  | 1.142791074 | 0.2843   | -1.134 |
| 160904_at   | 622    | 624.8  | 590.1  | 493.6  | 509.2  | 656.8  | 550.9  | 627    | 0.944050523 | 582.625  | 585.975  | 3.35    | 0.994283033 | 0.9518   | 1.005  |
| 160905_s_at | 354.7  | 309.3  | 404.8  | 398.5  | 334.9  | 301.1  | 320.1  | 373.7  | 0.255434937 | 366.825  | 332.45   | 34.375  | 1.103399007 | 0.2608   | -1.101 |
| 160906_i_at | 115.3  | 94     | 86.5   | 97.1   | 90     | 74.3   | 102.6  | 154.3  | 0.7211196   | 98.225   | 105.3    | 7.075   | 0.932811016 | 0.8287   | 1.038  |
| 160907_at   | 2218.5 | 1526.9 | 1160.8 | 1270.7 | 962.1  | 863.2  | 1159.6 | 920.6  | 0.093015569 | 1544.225 | 976.375  | 567.85  | 1.581590065 | 0.03295  | -1.541 |
| 160908_r_at | 455.1  | 476.8  | 452.1  | 430.9  | 450    | 537.5  | 542.4  | 413.3  | 0.399649882 | 453.725  | 485.8    | 32.075  | 0.933974887 | 0.4094   | 1.064  |
| 160909_at   | 166.7  | 106.1  | 194.4  | 91.2   | 64.4   | 140.4  | 37.9   | 164.8  | 0.370930331 | 139.6    | 101.875  | 37.725  | 1.370306748 | 0.312    | -1.535 |
| 160910_at   | 33.3   | 25.4   | 15.2   | 7.1    | 8.4    | 32.6   | 19.7   | 9.1    | 0.740459182 | 20.25    | 17.45    | 2.8     | 1.160458453 | 0.7566   | -1.165 |
| 160911_at   | 179.7  | 151.3  | 253    | 284    | 142.6  | 202.9  | 213.9  | 256.2  | 0.748100843 | 217      | 203.9    | 13.1    | 1.06424718  | 0.7939   | -1.054 |
| 160912_i_at | 97.5   | 65.3   | 115.4  | 137.7  | 95.7   | 114.8  | 100.9  | 118.7  | 0.83836707  | 103.975  | 107.525  | 3.55    | 0.966984422 | 0.7079   | 1.068  |
| 160913_at   | 106.5  | 73.8   | 88.7   | 96.8   | 113.3  | 119.3  | 69.6   | 102.6  | 0.488943609 | 91.45    | 101.2    | 9.75    | 0.903656126 | 0.5608   | 1.093  |
| 160914_at   | 16.1   | 13.9   | 15.4   | 17.1   | 16.1   | 19     | 18.1   | 17.5   | 0.064994277 | 15.625   | 17.675   | 2.05    | 0.884016973 | 0.06739  | 1.133  |
| 160915_at   | 551.7  | 472.6  | 489.5  | 558.3  | 472.3  | 548.7  | 512.3  | 550.5  | 0.921566019 | 518.025  | 520.95   | 2.925   | 0.994385258 | 0.9127   | 1.006  |
| 160916_at   | 63.6   | 82.2   | 100    | 99.4   | 98.9   | 51.2   | 94     | 108.4  | 0.909572529 | 86.3     | 88.125   | 1.825   | 0.97929078  | 0.9937   | 1.002  |
| 160917_r_at | 30.6   | 20.3   | 50.7   | 48.3   | 59.6   | 42.5   | 50.4   | 39.4   | 0.274323473 | 37.475   | 47.975   | 10.5    | 0.781136008 | 0.2485   | 1.348  |
| 160918_at   | 43.1   | 9.2    | 2      | 22.7   | 14.8   | 32.3   | 16.8   | 4.2    | 0.843764612 | 19.25    | 17.025   | 2.225   | 1.130690162 | 0.8514   | 1.167  |
| 160919_r_at | 4.4    | 10.1   | 6.5    | 24.5   | 8.5    | 14.1   | 19.5   | 14.3   | 0.616148029 | 11.375   | 14.1     | 2.725   | 0.806737589 | 0.3789   | 1.472  |
| 160920_at   | 341.3  | 354.5  | 307    | 509.2  | 367.6  | 475.8  | 443.2  | 405.4  | 0.418659885 | 378      | 423      | 45      | 0.893617021 | 0.3435   | 1.135  |
| 160921_at   | 422.7  | 304    | 469.7  | 545.9  | 207.6  | 263.4  | 247.5  | 277    | 0.029771275 | 435.575  | 248.875  | 186.7   | 1.750175791 | 0.007943 | -1.722 |
| 160922_at   | 209.2  | 211.6  | 194.4  | 179.1  | 226.8  | 331    | 191.9  | 226.8  | 0.228652753 | 198.575  | 244.125  | 45.55   | 0.813415259 | 0.1738   | 1.207  |
| 160923_at   | 185.4  | 148.2  | 133.8  | 141.5  | 99.4   | 193.5  | 138.8  | 131.5  | 0.635994025 | 152.225  | 140.8    | 11.425  | 1.081143466 | 0.5476   | -1.103 |
| 160924_at   | 280.1  | 289.8  | 200.9  | 292.5  | 406.5  | 311.8  | 379.1  | 366.3  | 0.014841551 | 265.825  | 365.925  | 100.1   | 0.726446676 | 0.02174  | 1.386  |
| 160925_at   | 343.4  | 462.4  | 558.8  | 296.4  | 450.9  | 494.6  | 346    | 416.6  | 0.86809977  | 415.25   | 427.025  | 11.775  | 0.972425502 | 0.7675   | 1.051  |
| 160926_r_at | 7.4    | 2.6    | 2.7    | 0.7    | 1.2    | 4.3    | 3.6    | 3.5    | 0.904849624 | 3.35     | 3.15     | 0.2     | 1.063492063 | 0.7982   | 1.164  |
| 160927_at   | 92.8   | 97.2   | 141.2  | 128.2  | 67.7   | 74     | 110.3  | 62.4   | 0.064551164 | 114.85   | 78.6     | 36.25   | 1.461195929 | 0.05412  | -1.475 |
| 160928_at   | 49.4   | 40.6   | 38.2   | 69.9   | 50.7   | 79.4   | 45.2   | 66.3   | 0.343975379 | 49.525   | 60.4     | 10.875  | 0.819950331 | 0.3198   | 1.225  |
| 160929_at   | 132.4  | 131.9  | 152.8  | 145.8  | 113.4  | 113.7  | 154.9  | 148.8  | 0.546695184 | 140.725  | 132.7    | 8.025   | 1.060474755 | 0.4927   | -1.069 |
| 160930_at   | 489.8  | 564.5  | 619.9  | 658.7  | 630.3  | 512.1  | 715.3  | 658    | 0.448872462 | 583.225  | 628.925  | 45.7    | 0.927336328 | 0.469    | 1.077  |
| 160931_at   | 460.3  | 443.3  | 629.5  | 571.3  | 592.3  | 511.2  | 653.1  | 509.6  | 0.502898441 | 526.1    | 566.55   | 40.45   | 0.928602948 | 0.4748   | 1.082  |
| 160932_at   | 73.9   | 63.3   | 73     | 72.9   | 56.9   | 51.6   | 74     | 64.5   | 0.166694827 | 70.775   | 61.75    | 9.025   | 1.146153846 | 0.147    | -1.154 |
| 160933_at   | 97.6   | 117.8  | 88.3   | 106.6  | 156.7  | 217    | 122.2  | 128.3  | 0.085988167 | 102.575  | 156.05   | 53.475  | 0.657321371 | 0.0327   | 1.49   |
| 160934_s_at | 70.9   | 72.7   | 114.4  | 77.4   | 92.4   | 134.4  | 149.7  | 116.6  | 0.050531303 | 83.85    | 123.275  | 39.425  | 0.680186575 | 0.04351  | 1.477  |
| 160935_at   | 224.2  | 222    | 326.8  | 347.1  | 313    | 246.5  | 237.4  | 286.7  | 0.818456348 | 280.025  | 270.9    | 9.125   | 1.033684016 | 0.8984   | 1.018  |



|             |        |        |        |        |        |        |        |        |             |          |          |         |             |          |        |
|-------------|--------|--------|--------|--------|--------|--------|--------|--------|-------------|----------|----------|---------|-------------|----------|--------|
| 160936_at   | 1034.4 | 909.5  | 1194   | 1129.6 | 833.8  | 1066.1 | 1448   | 1320.7 | 0.538703206 | 1066.875 | 1167.15  | 100.275 | 0.914085593 | 0.6115   | 1.076  |
| 160937_at   | 5.4    | 8.3    | 23.3   | 16.3   | 8.8    | 8.1    | 6.2    | 16.2   | 0.483933756 | 13.325   | 9.825    | 3.5     | 1.356234097 | 0.584    | -1.249 |
| 160938_at   | 366.1  | 320.9  | 404.4  | 534.7  | 343.1  | 202.8  | 315.4  | 453.9  | 0.304212438 | 406.525  | 328.8    | 77.725  | 1.236389903 | 0.2841   | -1.264 |
| 160939_at   | 397.5  | 511.6  | 654    | 542.6  | 431.2  | 474.3  | 549.8  | 624.3  | 0.926571573 | 526.425  | 519.9    | 6.525   | 1.01255049  | 0.9598   | 1.007  |
| 160940_at   | 14.6   | 10.2   | 11.8   | 33.9   | 44.3   | 40.8   | 13.3   | 32.1   | 0.143598688 | 17.625   | 32.625   | 15      | 0.540229885 | 0.1483   | 1.895  |
| 160941_at   | 105.4  | 126.1  | 153.9  | 141.8  | 162.6  | 176.7  | 144.1  | 196    | 0.046172922 | 131.8    | 169.85   | 38.05   | 0.775978805 | 0.04955  | 1.293  |
| 160942_at   | 248.5  | 260.2  | 484.6  | 416.2  | 254.1  | 243.8  | 418.2  | 445.7  | 0.884906036 | 352.375  | 340.45   | 11.925  | 1.03502717  | 0.8999   | 1.031  |
| 160943_at   | 13.1   | 77.4   | 100.6  | 159.8  | 267.9  | 23.6   | 16.4   | 150    | 0.70772759  | 87.725   | 114.475  | 26.75   | 0.766324525 | 0.9892   | -1.012 |
| 160944_at   | 9.9    | 17.8   | 11.9   | 13.6   | 22.4   | 13.2   | 10.2   | 12.5   | 0.703852568 | 13.3     | 14.575   | 1.275   | 0.912521441 | 0.7392   | 1.076  |
| 160945_at   | 15.8   | 5.8    | 2.5    | 11.7   | 3.8    | 13.4   | 22.5   | 5.3    | 0.67729763  | 8.95     | 11.25    | 2.3     | 0.795555556 | 0.732    | 1.233  |
| 160946_at   | 6      | 11.9   | 17.3   | 14.3   | 1.3    | 3      | 30.7   | 20.7   | 0.847201014 | 12.375   | 13.925   | 1.55    | 0.888689408 | 0.5567   | -1.639 |
| 160947_at   | 52.5   | 96.4   | 102.3  | 115.6  | 88.2   | 116.1  | 70.3   | 105.1  | 0.855889736 | 91.7     | 94.925   | 3.225   | 0.96602581  | 0.7881   | 1.06   |
| 160948_at   | 212    | 196.5  | 188.9  | 167.2  | 245.5  | 214.1  | 190.1  | 254    | 0.101411699 | 191.15   | 225.925  | 34.775  | 0.846077238 | 0.09503  | 1.179  |
| 160949_at   | 625.3  | 797.6  | 1238.7 | 1063.4 | 795.4  | 939.2  | 1103.9 | 1252.2 | 0.609100927 | 931.25   | 1022.675 | 91.425  | 0.910602097 | 0.5554   | 1.12   |
| 160950_at   | 62.1   | 8.7    | 4.7    | 8.9    | 17.7   | 50.4   | 21.3   | 17.3   | 0.739817317 | 21.1     | 26.675   | 5.575   | 0.791002812 | 0.3183   | 1.952  |
| 160951_at   | 69.7   | 11.6   | 46.1   | 18.8   | 32.7   | 31.6   | 19.2   | 11.2   | 0.419734686 | 36.55    | 23.675   | 12.875  | 1.543822598 | 0.5737   | -1.331 |
| 160952_r_at | 4.4    | 15.7   | 10.9   | 11.2   | 15.4   | 16.7   | 19.9   | 15.3   | 0.067115542 | 10.55    | 16.825   | 6.275   | 0.627043091 | 0.09248  | 1.743  |
| 160953_at   | 34.7   | 56.2   | 18.8   | 35.3   | 30.3   | 75.3   | 17.4   | 13.8   | 0.904002267 | 36.25    | 34.2     | 2.05    | 1.05994152  | 0.641    | -1.241 |
| 160954_at   | 254.1  | 137.7  | 138.7  | 137.2  | 139.5  | 239    | 155.6  | 143.8  | 0.947848554 | 166.925  | 169.475  | 2.55    | 0.984953533 | 0.8903   | 1.029  |
| 160955_at   | 763.4  | 897.3  | 767.8  | 790.6  | 1042.1 | 606.2  | 738.2  | 795.7  | 0.928798262 | 804.775  | 795.55   | 9.225   | 1.011595751 | 0.8177   | -1.029 |
| 160956_r_at | 36     | 10.9   | 27.5   | 30.1   | 30.4   | 49.8   | 21.7   | 38.1   | 0.311806825 | 26.125   | 35       | 8.875   | 0.746428571 | 0.3326   | 1.4    |
| 160957_at   | 161.1  | 134.6  | 164.7  | 184.3  | 198.5  | 97.9   | 142.7  | 238.7  | 0.81309962  | 161.175  | 169.45   | 8.275   | 0.951165536 | 0.9956   | 1.001  |
| 160958_at   | 535.9  | 593.1  | 629    | 630.6  | 612    | 464.5  | 614.3  | 606.9  | 0.618923206 | 597.15   | 574.425  | 22.725  | 1.0395613   | 0.5999   | -1.044 |
| 160959_at   | 307.3  | 333.5  | 456.4  | 482.8  | 479    | 347.5  | 442.9  | 476.9  | 0.469847501 | 395      | 436.575  | 41.575  | 0.904770085 | 0.4453   | 1.117  |
| 160960_at   | 296.9  | 301.9  | 351.8  | 432    | 330.9  | 312.3  | 513.1  | 503.2  | 0.319975512 | 345.65   | 414.875  | 69.225  | 0.833142513 | 0.3306   | 1.183  |
| 160961_at   | 278.7  | 226.9  | 291.7  | 328.2  | 279.2  | 350.2  | 250.1  | 352.5  | 0.454191783 | 281.375  | 308      | 26.625  | 0.913555195 | 0.4714   | 1.092  |
| 160962_at   | 1121.4 | 1024.1 | 1136.6 | 1020.1 | 705.1  | 963.9  | 765.5  | 775    | 0.009221819 | 1075.55  | 802.375  | 273.175 | 1.340458015 | 0.006326 | -1.348 |
| 160963_at   | 704.1  | 724.7  | 921.6  | 1025.4 | 813.4  | 824    | 896    | 959.6  | 0.747244964 | 843.95   | 873.25   | 29.3    | 0.96644718  | 0.6704   | 1.046  |
| 160964_at   | 723    | 529.8  | 590.8  | 652.2  | 641.7  | 827.6  | 631.6  | 653.3  | 0.340323748 | 623.95   | 688.55   | 64.6    | 0.906179653 | 0.3254   | 1.104  |
| 160965_at   | 413.1  | 342.5  | 303.5  | 281.7  | 484.6  | 489.4  | 355.1  | 451.1  | 0.041638241 | 335.2    | 445.05   | 109.85  | 0.753173801 | 0.04337  | 1.331  |
| 160966_at   | 383.4  | 385.1  | 519.8  | 548.8  | 447.9  | 402.5  | 552.6  | 483.3  | 0.828043819 | 459.275  | 471.575  | 12.3    | 0.973917192 | 0.784    | 1.034  |
| 160967_at   | 170.9  | 128.6  | 133    | 149.3  | 128.6  | 200.6  | 158.1  | 130    | 0.667272087 | 145.45   | 154.325  | 8.875   | 0.942491495 | 0.7053   | 1.05   |
| 160968_at   | 3834.7 | 4273.6 | 4088.9 | 5143.9 | 2411.6 | 1961.1 | 2285.5 | 2586.1 | 0.002419486 | 4335.275 | 2311.075 | 2024.2  | 1.875869455 | 0.000342 | -1.874 |
| 160969_at   | 44     | 56.3   | 49.8   | 84.9   | 52.2   | 69.2   | 25.7   | 59.7   | 0.607678388 | 58.75    | 51.7     | 7.05    | 1.136363636 | 0.5655   | -1.173 |
| 160970_at   | 141.4  | 220.4  | 214.9  | 415.3  | 229.7  | 242    | 351.8  | 448.8  | 0.404209141 | 248      | 318.075  | 70.075  | 0.779690325 | 0.3334   | 1.333  |
| 160971_at   | 3739.5 | 3344.8 | 2009.1 | 2588.9 | 3632.7 | 3258.5 | 2434.2 | 2815.6 | 0.814990213 | 2920.575 | 3035.25  | 114.675 | 0.962218928 | 0.7477   | 1.057  |
| 160972_at   | 92.4   | 28.8   | 28.4   | 39.1   | 42.2   | 106.6  | 40     | 85     | 0.37934307  | 47.175   | 68.45    | 21.275  | 0.689189189 | 0.3112   | 1.508  |
| 160973_at   | 533.4  | 502.9  | 526.4  | 638.3  | 583.9  | 544.3  | 603.8  | 542.9  | 0.609358866 | 550.25   | 568.725  | 18.475  | 0.967515056 | 0.5595   | 1.037  |
| 160974_at   | 226.9  | 225.2  | 234.6  | 167.8  | 283.5  | 219.4  | 158.7  | 221.5  | 0.819893089 | 213.625  | 220.775  | 7.15    | 0.967614087 | 0.8884   | 1.021  |
| 160975_at   | 125.2  | 196.1  | 197.7  | 301.4  | 124.2  | 99.2   | 142.2  | 266.3  | 0.399232418 | 205.1    | 157.975  | 47.125  | 1.298306694 | 0.343    | -1.33  |
| 160976_at   | 131.2  | 137.3  | 278.7  | 241.2  | 290.6  | 174.1  | 130.2  | 158.7  | 0.87063694  | 197.1    | 188.4    | 8.7     | 1.046178344 | 0.891    | -1.038 |
| 160977_at   | 79.4   | 93.3   | 103.6  | 92.5   | 113.9  | 85.5   | 116.6  | 123.5  | 0.130518665 | 92.2     | 109.875  | 17.675  | 0.839135381 | 0.1359   | 1.185  |
| 160978_at   | 29.8   | 35.4   | 66.1   | 43.9   | 62.9   | 51.8   | 52     | 35.7   | 0.514484472 | 43.8     | 50.6     | 6.8     | 0.865612648 | 0.4456   | 1.186  |
| 160979_at   | 572.4  | 748.2  | 838.9  | 1073.8 | 688.6  | 618.9  | 837.3  | 806.4  | 0.573934835 | 808.325  | 737.8    | 70.525  | 1.095588235 | 0.6386   | -1.076 |
| 160980_at   | 111.2  | 114.6  | 132.8  | 171.4  | 137    | 138.9  | 149.5  | 159.9  | 0.404479875 | 132.5    | 146.325  | 13.825  | 0.905518538 | 0.3264   | 1.119  |
| 160981_at   | 212    | 178.2  | 228    | 172.9  | 156.2  | 244.1  | 223.8  | 204.2  | 0.70186309  | 197.775  | 207.075  | 9.3     | 0.955088736 | 0.7509   | 1.04   |
| 160982_at   | 187.1  | 157.3  | 172    | 252.7  | 186.3  | 198.4  | 178    | 206.7  | 0.997460727 | 192.275  | 192.35   | 0.075   | 0.999610086 | 0.8927   | 1.015  |
| 160983_at   | 424.3  | 414.5  | 339.7  | 300.9  | 367.2  | 383.7  | 225    | 206.3  | 0.234402357 | 369.85   | 295.55   | 74.3    | 1.251395703 | 0.2124   | -1.288 |
| 160984_r_at | 16.7   | 8.2    | 13.1   | 14.5   | 12.1   | 17.6   | 12     | 17.6   | 0.507468271 | 13.125   | 14.825   | 1.7     | 0.885328836 | 0.4897   | 1.148  |
| 160985_at   | 8.2    | 7.7    | 12     | 3.7    | 3.6    | 5.9    | 5.2    | 4.1    | 0.154674144 | 7.9      | 4.7      | 3.2     | 1.680851064 | 0.1441   | -1.577 |
| 160986_r_at | 28.3   | 82.4   | 115.1  | 45.8   | 195.3  | 48.6   | 130.2  | 134.9  | 0.156902877 | 67.9     | 127.25   | 59.35   | 0.533595285 | 0.1807   | 1.919  |
| 160987_r_at | 10.5   | 26.5   | 18.5   | 17.6   | 14.5   | 27.3   | 22.7   | 23.5   | 0.414599829 | 18.275   | 22       | 3.725   | 0.830681818 | 0.4012   | 1.236  |
| 160988_r_at | 158.1  | 173.7  | 277.9  | 256.1  | 216.7  | 194.9  | 260.7  | 250.9  | 0.687114372 | 216.45   | 230.8    | 14.35   | 0.937824957 | 0.5973   | 1.09   |
| 160989_r_at | 79.7   | 120.5  | 142.4  | 157.8  | 161.2  | 222.2  | 162.1  | 146.2  | 0.092170095 | 125.1    | 172.925  | 47.825  | 0.723435015 | 0.0996   | 1.408  |
| 160990_r_at | 178.4  | 203.1  | 282.7  | 355.4  | 192.9  | 127.2  | 269.9  | 244.2  | 0.40106488  | 254.9    | 208.55   | 46.35   | 1.222248861 | 0.4106   | -1.225 |
| 160991_at   | 419.3  | 409.4  | 409.3  | 456    | 468.7  | 462.8  | 415.5  | 502.3  | 0.123992738 | 423.5    | 462.325  | 38.825  | 0.916022279 | 0.1141   | 1.09   |



|             |        |        |        |        |       |        |        |        |             |          |          |         |             |          |        |
|-------------|--------|--------|--------|--------|-------|--------|--------|--------|-------------|----------|----------|---------|-------------|----------|--------|
| 160992_at   | 40.3   | 46.4   | 52.7   | 67     | 49.2  | 56.4   | 40.7   | 41.7   | 0.527893675 | 51.6     | 47       | 4.6     | 1.09787234  | 0.5461   | -1.088 |
| 160993_at   | 11.1   | 43.6   | 35.2   | 51     | 21.2  | 9.9    | 44.2   | 48     | 0.738914097 | 35.225   | 30.825   | 4.4     | 1.142741281 | 0.751    | -1.183 |
| 160994_at   | 356.9  | 216.8  | 315.1  | 367.6  | 340.4 | 276.4  | 297    | 359.3  | 0.919802092 | 314.1    | 318.275  | 4.175   | 0.986882413 | 0.8415   | 1.029  |
| 160995_at   | 88.2   | 158.7  | 222.4  | 185.7  | 196.1 | 175.2  | 174.4  | 157.5  | 0.706389008 | 163.75   | 175.8    | 12.05   | 0.9314562   | 0.5716   | 1.131  |
| 160996_at   | 38.3   | 20.7   | 23.3   | 41.2   | 28.4  | 28.5   | 39.4   | 30.7   | 0.886770899 | 30.875   | 31.75    | 0.875   | 0.972440945 | 0.7527   | 1.065  |
| 160997_at   | 105.4  | 116.1  | 118.6  | 111    | 104.3 | 89.9   | 117.2  | 123.9  | 0.650229981 | 112.775  | 108.825  | 3.95    | 1.036296807 | 0.5953   | -1.043 |
| 160998_at   | 640.8  | 568.2  | 653.7  | 755    | 682   | 654.1  | 740.8  | 745.3  | 0.304308277 | 654.425  | 705.55   | 51.125  | 0.9275388   | 0.2805   | 1.082  |
| 160999_r_at | 317    | 242.8  | 215.5  | 193.2  | 248.6 | 323.4  | 168.7  | 233.5  | 0.973843737 | 242.125  | 243.55   | 1.425   | 0.994149045 | 0.9866   | 1.003  |
| 161000_i_at | 1187   | 1184.7 | 1529.5 | 1497.4 | 1564  | 1484.5 | 1563.7 | 1696   | 0.091372587 | 1349.65  | 1577.05  | 227.4   | 0.855806728 | 0.07623  | 1.176  |
| 161001_at   | 115.8  | 165.7  | 198.7  | 161.8  | 206.5 | 131.8  | 199.6  | 161.4  | 0.578307116 | 160.5    | 174.825  | 14.325  | 0.918060918 | 0.5887   | 1.092  |
| 161002_at   | 162.3  | 115.6  | 148.6  | 153.2  | 150.8 | 144.8  | 117.7  | 193.9  | 0.72882023  | 144.925  | 151.8    | 6.875   | 0.954710145 | 0.7709   | 1.039  |
| 161003_at   | 172.3  | 92.1   | 169.5  | 184    | 90.6  | 253.7  | 169.4  | 189.8  | 0.612434787 | 154.475  | 175.875  | 21.4    | 0.878322672 | 0.7239   | 1.105  |
| 161004_at   | 450.1  | 411.4  | 364.5  | 398.9  | 438.4 | 548.8  | 318.3  | 394.5  | 0.733815181 | 406.225  | 425      | 18.775  | 0.955823529 | 0.8202   | 1.029  |
| 161005_at   | 627.9  | 747.1  | 600.4  | 753.3  | 1027  | 729.9  | 744.2  | 817.8  | 0.123750066 | 682.175  | 829.725  | 147.55  | 0.822169996 | 0.09804  | 1.211  |
| 161006_at   | 295.9  | 274.3  | 261.1  | 252.9  | 204.3 | 207.3  | 132.5  | 213.3  | 0.015481685 | 271.05   | 189.35   | 81.7    | 1.431476102 | 0.01943  | -1.455 |
| 161007_at   | 167    | 120.8  | 115.7  | 146.2  | 107.5 | 201.9  | 147.4  | 114    | 0.839554761 | 137.425  | 142.7    | 5.275   | 0.963034338 | 0.9232   | 1.017  |
| 161008_at   | 22.4   | 15.6   | 18.9   | 20.7   | 17.9  | 26.6   | 19.7   | 21     | 0.456011291 | 19.4     | 21.3     | 1.9     | 0.910798122 | 0.4488   | 1.098  |
| 161009_at   | 83.1   | 93.3   | 111.4  | 123.5  | 109.1 | 107.5  | 107.8  | 126.5  | 0.379098864 | 102.825  | 112.725  | 9.9     | 0.912175649 | 0.3355   | 1.107  |
| 161010_r_at | 62.5   | 20.3   | 25.4   | 30.9   | 26.6  | 37.4   | 39.4   | 33.3   | 0.954963569 | 34.775   | 34.175   | 0.6     | 1.017556693 | 0.8048   | 1.069  |
| 161011_at   | 203.2  | 230.3  | 317.5  | 414.5  | 231.8 | 211.6  | 224.8  | 345.6  | 0.53392691  | 291.375  | 253.45   | 37.925  | 1.149635036 | 0.562    | -1.128 |
| 161012_at   | 61.9   | 114.9  | 43.9   | 17.9   | 48.2  | 77.3   | 43.6   | 16.9   | 0.606958377 | 59.65    | 46.5     | 13.15   | 1.282795699 | 0.7344   | -1.195 |
| 161013_f_at | 1024.6 | 842.6  | 1050.7 | 1330.6 | 728.8 | 606.9  | 909.4  | 1008.4 | 0.11569278  | 1062.125 | 813.375  | 248.75  | 1.305824497 | 0.1136   | -1.313 |
| 161014_at   | 168.4  | 125.9  | 244.1  | 207.3  | 160.7 | 187.3  | 185.7  | 212.2  | 0.998636606 | 186.425  | 186.475  | 0.05    | 0.999731868 | 0.8751   | 1.026  |
| 161015_at   | 28.1   | 12.4   | 20.6   | 10.8   | 17    | 18.6   | 15.2   | 8.6    | 0.52599875  | 17.975   | 14.85    | 3.125   | 1.21043771  | 0.5949   | -1.172 |
| 161016_at   | 258.4  | 203.3  | 308.8  | 305.3  | 259.7 | 447.3  | 467.1  | 250.5  | 0.241112085 | 268.95   | 356.15   | 87.2    | 0.755159343 | 0.2431   | 1.287  |
| 161017_at   | 64.5   | 30.5   | 38     | 21.6   | 29.3  | 60     | 33.5   | 36.6   | 0.920738673 | 38.65    | 39.85    | 1.2     | 0.969887077 | 0.8066   | 1.074  |
| 161018_at   | 261.4  | 354    | 253.7  | 308.4  | 425   | 304.8  | 219    | 298.2  | 0.7355139   | 294.375  | 311.75   | 17.375  | 0.944266239 | 0.8108   | 1.04   |
| 161019_at   | 428.5  | 323.8  | 362.7  | 432.4  | 380.1 | 351.1  | 333.9  | 223.9  | 0.18817116  | 386.85   | 322.25   | 64.6    | 1.200465477 | 0.2051   | -1.215 |
| 161020_r_at | 23.5   | 9.3    | 5.4    | 25.7   | 18.6  | 2.9    | 1.4    | 12     | 0.307794151 | 15.975   | 8.725    | 7.25    | 1.830945559 | 0.2644   | -2.397 |
| 161021_at   | 426    | 406.4  | 430.2  | 361.2  | 640   | 483.5  | 631.3  | 490.7  | 0.029663751 | 405.95   | 561.375  | 155.425 | 0.723135159 | 0.01056  | 1.374  |
| 161022_at   | 61.6   | 44.1   | 57.6   | 52.9   | 39.4  | 30.5   | 20.3   | 51     | 0.05734286  | 54.05    | 35.3     | 18.75   | 1.531161473 | 0.0638   | -1.606 |
| 161023_at   | 493.1  | 511.9  | 398.7  | 513.7  | 418   | 523.6  | 381.2  | 351.4  | 0.242652717 | 479.35   | 418.55   | 60.8    | 1.145263409 | 0.226    | -1.152 |
| 161024_at   | 114.7  | 120.5  | 130.2  | 134.8  | 110.4 | 122.4  | 121.7  | 111.5  | 0.181739264 | 125.05   | 116.5    | 8.55    | 1.073390558 | 0.1782   | -1.073 |
| 161025_f_at | 737.5  | 658.2  | 808.1  | 844.6  | 407.8 | 394.7  | 553    | 625.4  | 0.010274371 | 762.1    | 495.225  | 266.875 | 1.538896461 | 0.01228  | -1.562 |
| 161026_s_at | 562.6  | 597    | 663.5  | 612.7  | 814.3 | 610.3  | 802.8  | 664.7  | 0.106004097 | 608.95   | 723.025  | 114.075 | 0.842225373 | 0.08014  | 1.18   |
| 161027_f_at | 38     | 71.7   | 44.7   | 98.5   | 24.8  | 27.8   | 53.1   | 50.2   | 0.187759594 | 63.225   | 38.975   | 24.25   | 1.622193714 | 0.162    | -1.598 |
| 161028_at   | 121.7  | 125.6  | 256.9  | 275.3  | 263   | 230.6  | 409.4  | 307.1  | 0.106798418 | 194.875  | 302.525  | 107.65  | 0.64416164  | 0.1025   | 1.63   |
| 161029_at   | 151.9  | 111.8  | 123.8  | 136.5  | 99.8  | 204    | 129.5  | 181.1  | 0.424412423 | 131      | 153.6    | 22.6    | 0.852864583 | 0.4946   | 1.136  |
| 161030_at   | 2134.4 | 1805.9 | 1017.6 | 1312.5 | 1332  | 1531.8 | 856.9  | 959.4  | 0.234947684 | 1567.6   | 1170.025 | 397.575 | 1.339800432 | 0.2382   | -1.324 |
| 161031_at   | 49.9   | 79     | 103.1  | 101.3  | 99.7  | 59.6   | 79.9   | 84     | 0.87189406  | 83.325   | 80.8     | 2.525   | 1.03125     | 0.9689   | 1.008  |
| 161032_i_at | 32.6   | 43.2   | 36.5   | 81     | 42.7  | 37.6   | 44.3   | 57.2   | 0.820976742 | 48.325   | 45.45    | 2.875   | 1.063256326 | 0.9799   | 1.006  |
| 161033_at   | 18.1   | 52.7   | 25.2   | 21.8   | 25.7  | 7.6    | 5.9    | 6      | 0.107071886 | 29.45    | 11.3     | 18.15   | 2.60619469  | 0.04245  | -2.952 |
| 161034_at   | 124.5  | 153    | 106.3  | 146.2  | 130.8 | 166.6  | 55.9   | 150.9  | 0.820827774 | 132.5    | 126.05   | 6.45    | 1.051170171 | 0.6664   | -1.127 |
| 161035_at   | 12.3   | 3.8    | 10.1   | 2.8    | 11.5  | 10.4   | 6      | 4.1    | 0.806714289 | 7.25     | 8        | 0.75    | 0.90625     | 0.6675   | 1.217  |
| 161036_at   | 60.1   | 56.6   | 50     | 79.9   | 94.1  | 93.3   | 101    | 114.1  | 0.00351457  | 61.65    | 100.625  | 38.975  | 0.612670807 | 0.003811 | 1.652  |
| 161037_at   | 21.7   | 23     | 16.3   | 29.3   | 25.2  | 20.8   | 29.6   | 12.3   | 0.899937194 | 22.575   | 21.975   | 0.6     | 1.027303754 | 0.8149   | -1.057 |
| 161038_at   | 56.8   | 53.1   | 77.5   | 72.7   | 64.5  | 69.2   | 96.7   | 74.9   | 0.270167209 | 65.025   | 76.325   | 11.3    | 0.851948903 | 0.2548   | 1.174  |
| 161039_at   | 20.6   | 18.8   | 19     | 14.2   | 20.6  | 43.1   | 23.2   | 16     | 0.297271955 | 18.15    | 25.725   | 7.575   | 0.705539359 | 0.2478   | 1.335  |
| 161040_at   | 87.3   | 50.8   | 71.6   | 91.3   | 44.9  | 79.8   | 83.9   | 62.4   | 0.579725695 | 75.25    | 67.75    | 7.5     | 1.110701107 | 0.598    | -1.115 |
| 161041_at   | 382    | 462.9  | 352.6  | 417.1  | 713.3 | 469.2  | 336.9  | 412.9  | 0.408762044 | 403.65   | 483.075  | 79.425  | 0.835584537 | 0.4219   | 1.157  |
| 161042_at   | 204.9  | 121.7  | 132.8  | 136.1  | 226.2 | 230.8  | 230.6  | 154.2  | 0.060324568 | 148.875  | 210.45   | 61.575  | 0.707412687 | 0.05979  | 1.424  |
| 161043_r_at | 45.5   | 7.5    | 9.3    | 12.8   | 10.9  | 35.9   | 17.4   | 9.3    | 0.971948954 | 18.775   | 18.375   | 0.4     | 1.021768707 | 0.8339   | 1.117  |
| 161044_at   | 317    | 334.6  | 424.6  | 469.3  | 367.5 | 358    | 312.7  | 413.9  | 0.601886103 | 386.375  | 363.025  | 23.35   | 1.064320639 | 0.6411   | -1.056 |
| 161045_at   | 125.1  | 78.3   | 121.9  | 210.9  | 241.1 | 254.8  | 222.7  | 217    | 0.031483949 | 134.05   | 233.9    | 99.85   | 0.573108166 | 0.02421  | 1.852  |
| 161046_at   | 138.3  | 81.9   | 91.8   | 99.6   | 79.1  | 50.3   | 15.1   | 36.8   | 0.01970423  | 102.9    | 45.325   | 57.575  | 2.27027027  | 0.03971  | -2.616 |
| 161047_at   | 17.2   | 15.7   | 8.6    | 14.2   | 40.2  | 34.7   | 28.7   | 14.9   | 0.057161496 | 13.925   | 29.625   | 15.7    | 0.470042194 | 0.03554  | 2.062  |



|             |        |        |        |        |        |        |        |        |             |          |          |        |             |         |        |
|-------------|--------|--------|--------|--------|--------|--------|--------|--------|-------------|----------|----------|--------|-------------|---------|--------|
| 161048_at   | 18.8   | 9.4    | 8      | 13.3   | 9.7    | 20.7   | 10.8   | 19.4   | 0.486545836 | 12.375   | 15.15    | 2.775  | 0.816831683 | 0.4878  | 1.224  |
| 161049_at   | 2.4    | 4.8    | 5      | 17.6   | 9.5    | 7.1    | 4.5    | 16.2   | 0.676144756 | 7.45     | 9.325    | 1.875  | 0.798927614 | 0.4519  | 1.488  |
| 161050_at   | 864.8  | 1010.3 | 1025.9 | 1200.4 | 1081.5 | 758.5  | 1133.8 | 1129.6 | 0.996627064 | 1025.35  | 1025.85  | 0.5    | 0.999512599 | 0.9614  | 1.006  |
| 161051_at   | 52.5   | 80.5   | 44.3   | 41.8   | 34.4   | 35.6   | 26.7   | 37.3   | 0.092576372 | 54.775   | 33.5     | 21.275 | 1.635074627 | 0.03102 | -1.592 |
| 161052_r_at | 194.8  | 150.5  | 126.9  | 139.9  | 144    | 181    | 125.4  | 147.3  | 0.854346124 | 153.025  | 149.425  | 3.6    | 1.024092354 | 0.875   | 1.02   |
| 161053_at   | 3      | 2.2    | 1.6    | 6.9    | 1.7    | 4.7    | 6.2    | 12.9   | 0.322541838 | 3.425    | 6.375    | 2.95   | 0.537254902 | 0.3332  | 1.729  |
| 161054_at   | 33.2   | 54.6   | 38     | 63.1   | 40     | 66.1   | 33.1   | 58.9   | 0.833225577 | 47.225   | 49.525   | 2.3    | 0.953558809 | 0.8552  | 1.043  |
| 161055_r_at | 17.4   | 11.8   | 15.8   | 19.5   | 30.7   | 30.3   | 20.7   | 21.3   | 0.030547866 | 16.125   | 25.75    | 9.625  | 0.626213592 | 0.02125 | 1.598  |
| 161056_at   | 463.1  | 468.9  | 508.9  | 491.8  | 486    | 517    | 466.5  | 474    | 0.866192007 | 483.175  | 485.875  | 2.7    | 0.994443015 | 0.8672  | 1.005  |
| 161057_at   | 156.5  | 115.3  | 154.6  | 153.6  | 132.1  | 172.6  | 133.9  | 134.4  | 0.904200383 | 145      | 143.25   | 1.75   | 1.012216405 | 0.9155  | 1.011  |
| 161058_f_at | 117.2  | 100.2  | 105.5  | 121.7  | 165.6  | 129.9  | 112.3  | 102.2  | 0.33489061  | 111.15   | 127.5    | 16.35  | 0.871764706 | 0.3231  | 1.131  |
| 161059_at   | 82     | 13     | 22.6   | 55.3   | 55.9   | 81     | 40.3   | 41.1   | 0.56523097  | 43.225   | 54.575   | 11.35  | 0.792029317 | 0.3744  | 1.538  |
| 161060_i_at | 151.9  | 230.2  | 187.4  | 183.3  | 192.8  | 177.3  | 191.8  | 221.5  | 0.698019841 | 188.2    | 195.85   | 7.65   | 0.960939495 | 0.6411  | 1.049  |
| 161061_r_at | 21.7   | 30.1   | 37.6   | 47.9   | 46.9   | 32.7   | 35.3   | 55.1   | 0.325229314 | 34.325   | 42.5     | 8.175  | 0.807647059 | 0.3057  | 1.262  |
| 161062_r_at | 64.6   | 72.4   | 63.4   | 130.5  | 46.4   | 49.6   | 94.4   | 127.7  | 0.903280025 | 82.725   | 79.525   | 3.2    | 1.040238919 | 0.79    | -1.087 |
| 161063_r_at | 1685.4 | 1308   | 1349   | 1354.9 | 1299.1 | 1620.6 | 1224.4 | 1159.8 | 0.493350678 | 1424.325 | 1325.975 | 98.35  | 1.074171836 | 0.4566  | -1.077 |
| 161064_f_at | 226    | 387.2  | 373.5  | 387.9  | 758.6  | 281.6  | 293.7  | 488.1  | 0.401468299 | 343.65   | 455.5    | 111.85 | 0.754445664 | 0.444   | 1.247  |
| 161065_at   | 105.8  | 188.9  | 163.9  | 150.1  | 233.5  | 145.4  | 88.7   | 185.4  | 0.766948141 | 152.175  | 163.25   | 11.075 | 0.932159265 | 0.8993  | 1.032  |
| 161066_at   | 83.4   | 90.9   | 75.3   | 80.2   | 113.5  | 94.4   | 93.8   | 108.7  | 0.018918618 | 82.45    | 102.6    | 20.15  | 0.803606238 | 0.01304 | 1.243  |
| 161067_at   | 34.7   | 26.8   | 43.6   | 64.5   | 50.5   | 31.1   | 92.7   | 76.8   | 0.257855577 | 42.4     | 62.775   | 20.375 | 0.675428116 | 0.2795  | 1.439  |
| 161068_at   | 119.7  | 105.8  | 96.5   | 120    | 69     | 131.4  | 83.6   | 86.6   | 0.289024336 | 110.5    | 92.65    | 17.85  | 1.19266055  | 0.2156  | -1.223 |
| 161069_at   | 9.5    | 6.9    | 2.7    | 15.4   | 3.8    | 20.6   | 8.4    | 5.5    | 0.845096271 | 8.625    | 9.575    | 0.95   | 0.90078329  | 0.8961  | 1.073  |
| 161070_at   | 192.2  | 214.1  | 321.8  | 399.5  | 223.6  | 180.4  | 274.5  | 273.3  | 0.453897893 | 281.9    | 237.95   | 43.95  | 1.184702669 | 0.5081  | -1.15  |
| 161071_at   | 137.1  | 139.9  | 148    | 142.8  | 152.2  | 213.6  | 181.8  | 160    | 0.082582913 | 141.95   | 176.9    | 34.95  | 0.802430752 | 0.03396 | 1.236  |
| 161072_at   | 43.9   | 53.3   | 42.9   | 42.2   | 71.4   | 111.5  | 43     | 48.1   | 0.238678064 | 45.575   | 68.5     | 22.925 | 0.665328467 | 0.1783  | 1.404  |
| 161073_at   | 626.4  | 335.5  | 662.5  | 672.2  | 510.6  | 570.8  | 677.7  | 609.6  | 0.846569334 | 574.15   | 592.175  | 18.025 | 0.969561363 | 0.7351  | 1.065  |
| 161074_at   | 333.5  | 316.3  | 463.8  | 481.8  | 506.3  | 386.6  | 548    | 461    | 0.216286757 | 398.85   | 475.475  | 76.625 | 0.838845365 | 0.2117  | 1.203  |
| 161075_at   | 149.2  | 101.5  | 132.9  | 175.6  | 111.6  | 134.8  | 108.4  | 116.5  | 0.258402685 | 139.8    | 117.825  | 21.975 | 1.186505411 | 0.262   | -1.168 |
| 161076_at   | 1082.4 | 1032.3 | 933.3  | 1030.7 | 1029.7 | 932.8  | 898.2  | 891.7  | 0.11697667  | 1019.675 | 938.1    | 81.575 | 1.08695768  | 0.1153  | -1.087 |
| 161077_f_at | 1531.4 | 1646.9 | 1662.3 | 1893.9 | 2082.1 | 1405.4 | 1979.2 | 2065   | 0.321281513 | 1683.625 | 1882.925 | 199.3  | 0.894154042 | 0.3624  | 1.108  |
| 161078_at   | 86.9   | 15.4   | 67.3   | 57.2   | 70.3   | 119.3  | 75.5   | 82.8   | 0.161243603 | 56.7     | 86.975   | 30.275 | 0.651911469 | 0.201   | 1.784  |
| 161079_at   | 235.7  | 238.3  | 170.5  | 201.4  | 210.3  | 224.1  | 307.7  | 171.2  | 0.631720658 | 211.475  | 228.325  | 16.85  | 0.926201686 | 0.6785  | 1.065  |
| 161080_f_at | 69.3   | 91.8   | 135.7  | 172.3  | 87.5   | 79.5   | 106.5  | 139.6  | 0.621369819 | 117.275  | 103.275  | 14     | 1.135560397 | 0.7147  | -1.095 |
| 161081_at   | 91.5   | 98.9   | 148.8  | 147.4  | 172.2  | 135.9  | 153.9  | 199.6  | 0.077483222 | 121.65   | 165.4    | 43.75  | 0.735489722 | 0.07972 | 1.379  |
| 161082_r_at | 35     | 70.6   | 38     | 69.1   | 48.1   | 83.2   | 28.1   | 44.1   | 0.884068172 | 53.175   | 50.875   | 2.3    | 1.045208845 | 0.8244  | -1.07  |
| 161083_at   | 89.6   | 83.6   | 81.2   | 91     | 101.3  | 79.9   | 64.8   | 89.6   | 0.778494306 | 86.35    | 83.9     | 2.45   | 1.02920143  | 0.6945  | -1.042 |
| 161084_at   | 46.8   | 40.5   | 45.7   | 54     | 62.5   | 68.6   | 33.9   | 48     | 0.477280083 | 46.75    | 53.25    | 6.5    | 0.877934272 | 0.5753  | 1.105  |
| 161085_r_at | 373.1  | 358    | 322.3  | 338    | 305    | 421.7  | 420.3  | 355.1  | 0.413776818 | 347.85   | 375.525  | 27.675 | 0.926303176 | 0.4408  | 1.072  |
| 161086_at   | 75.6   | 96.7   | 119.8  | 139    | 79.6   | 122.5  | 169.2  | 127.2  | 0.491972633 | 107.775  | 124.625  | 16.85  | 0.864794383 | 0.531   | 1.146  |
| 161087_r_at | 4.8    | 6.4    | 28.7   | 47.4   | 30.5   | 8.3    | 6.6    | 9.7    | 0.519630534 | 21.825   | 13.775   | 8.05   | 1.584392015 | 0.7274  | -1.27  |
| 161088_r_at | 50.2   | 41.6   | 34.1   | 42.9   | 34.1   | 46.4   | 39.6   | 37.9   | 0.543709254 | 42.2     | 39.5     | 2.7    | 1.06835443  | 0.5582  | -1.065 |
| 161089_r_at | 2.1    | 5.6    | 0.3    | 1.6    | 0.5    | 6.3    | 13     | 0.6    | 0.444086185 | 2.4      | 5.1      | 2.7    | 0.470588235 | 0.6957  | 1.522  |
| 161090_i_at | 192.3  | 81.2   | 110.7  | 119    | 93.3   | 242.4  | 100    | 131    | 0.719204811 | 125.8    | 141.675  | 15.875 | 0.887947768 | 0.7569  | 1.095  |
| 161091_r_at | 63.5   | 52     | 8.7    | 16.3   | 27.9   | 75.9   | 36.2   | 12.4   | 0.880816032 | 35.125   | 38.1     | 2.975  | 0.92191601  | 0.7818  | 1.191  |
| 161092_at   | 610.3  | 637.7  | 617.2  | 547.8  | 612.9  | 653.7  | 733.2  | 598.8  | 0.251152969 | 603.25   | 649.65   | 46.4   | 0.928576926 | 0.243   | 1.075  |
| 161093_at   | 53.8   | 60     | 53.6   | 53.1   | 56.6   | 55.5   | 68.2   | 58     | 0.244221684 | 55.125   | 59.575   | 4.45   | 0.925304238 | 0.2225  | 1.078  |
| 161094_r_at | 32.4   | 17.5   | 29.4   | 19.6   | 37.3   | 13.8   | 22.5   | 15.8   | 0.726824378 | 24.725   | 22.35    | 2.375  | 1.106263982 | 0.6068  | -1.157 |
| 161095_i_at | 2.1    | 2.6    | 1.4    | 1.9    | 1.8    | 1.7    | 1.8    | 3.4    | 0.729684003 | 2        | 2.175    | 0.175  | 0.91954023  | 0.7198  | 1.08   |
| 161096_at   | 236.8  | 206.5  | 169.9  | 170.5  | 182.9  | 169.5  | 272.5  | 253.7  | 0.4668998   | 195.925  | 219.65   | 23.725 | 0.891987252 | 0.496   | 1.109  |
| 161097_at   | 21.1   | 30.1   | 9.6    | 47.3   | 30.1   | 68.1   | 42.8   | 33.9   | 0.2028873   | 27.025   | 43.725   | 16.7   | 0.618067467 | 0.1779  | 1.791  |
| 161098_at   | 13     | 33.1   | 16.2   | 21.7   | 35     | 55.7   | 25.1   | 9.4    | 0.385872941 | 21       | 31.3     | 10.3   | 0.670926518 | 0.5404  | 1.32   |
| 161099_at   | 216.8  | 192.9  | 290.8  | 261.2  | 208.6  | 214.5  | 238.6  | 285    | 0.898047314 | 240.425  | 236.675  | 3.75   | 1.015844513 | 0.9288  | 1.011  |
| 161100_at   | 104.9  | 127.1  | 155.1  | 220.6  | 209.9  | 138.2  | 213.2  | 200    | 0.261947936 | 151.925  | 190.325  | 38.4   | 0.798239853 | 0.2351  | 1.283  |
| 161101_r_at | 152.6  | 80.5   | 87.5   | 74.3   | 93.3   | 130.8  | 90.6   | 80.6   | 0.996426443 | 98.725   | 98.825   | 0.1    | 0.99898811  | 0.892   | 1.028  |
| 161102_at   | 6.7    | 8.8    | 4.5    | 9      | 4      | 6.8    | 4.2    | 4.2    | 0.105989056 | 7.25     | 4.8      | 2.45   | 1.510416667 | 0.09153 | -1.502 |
| 161103_at   | 92.5   | 83.7   | 132.1  | 154    | 112.2  | 47.4   | 140.2  | 107.5  | 0.611189464 | 115.575  | 101.825  | 13.75  | 1.1350356   | 0.5662  | -1.184 |



|             |        |        |        |        |        |        |        |        |             |          |          |         |             |          |        |
|-------------|--------|--------|--------|--------|--------|--------|--------|--------|-------------|----------|----------|---------|-------------|----------|--------|
| 161104_at   | 1822.1 | 2754.7 | 1445.4 | 2022.8 | 1892.7 | 1535.2 | 1843.6 | 1891.7 | 0.491770137 | 2011.25  | 1790.8   | 220.45  | 1.123101407 | 0.5413   | -1.097 |
| 161105_at   | 41.3   | 50     | 60.6   | 57.5   | 85.7   | 96.6   | 82.5   | 95.2   | 0.000591904 | 52.35    | 90       | 37.65   | 0.581666667 | 0.001105 | 1.734  |
| 161106_r_at | 32.1   | 18.5   | 15.4   | 52.9   | 13.1   | 34.7   | 23.6   | 17.6   | 0.479509555 | 29.725   | 22.25    | 7.475   | 1.335955056 | 0.524    | -1.266 |
| 161107_r_at | 5      | 5.7    | 18.5   | 4.8    | 17.4   | 48.5   | 21.8   | 17.1   | 0.095261665 | 8.5      | 26.2     | 17.7    | 0.324427481 | 0.02469  | 3.341  |
| 161108_r_at | 192.2  | 176.4  | 78.2   | 50.1   | 32.6   | 94.1   | 81.5   | 59     | 0.205863265 | 124.225  | 66.8     | 57.425  | 1.859655689 | 0.2198   | -1.733 |
| 161109_at   | 53.3   | 19.6   | 50.3   | 68     | 57.7   | 59.1   | 59.9   | 75.3   | 0.2387463   | 47.8     | 63       | 15.2    | 0.758730159 | 0.2404   | 1.441  |
| 161110_at   | 194.1  | 172.3  | 167.1  | 193.3  | 273.3  | 252.7  | 121    | 198    | 0.452957089 | 181.7    | 211.25   | 29.55   | 0.860118343 | 0.5907   | 1.112  |
| 161111_f_at | 4602.4 | 3931.3 | 3606.4 | 4130.9 | 4043.6 | 3915.1 | 3531.2 | 3510.8 | 0.255606906 | 4067.75  | 3750.175 | 317.575 | 1.084682715 | 0.2498   | -1.083 |
| 161112_at   | 179    | 138.5  | 145.2  | 146.4  | 175.3  | 199.2  | 151.8  | 183.6  | 0.109900264 | 152.275  | 177.475  | 25.2    | 0.85800817  | 0.1054   | 1.166  |
| 161113_at   | 18.9   | 27.7   | 31.4   | 38.1   | 21.2   | 30.3   | 25.9   | 29.7   | 0.641782488 | 29.025   | 26.775   | 2.25    | 1.084033613 | 0.7362   | -1.061 |
| 161114_i_at | 16.9   | 42.7   | 28.8   | 31.1   | 32     | 17.6   | 26.6   | 35.1   | 0.765235366 | 29.875   | 27.825   | 2.05    | 1.073674753 | 0.8427   | -1.052 |
| 161115_r_at | 80.2   | 83.9   | 27.5   | 42.8   | 30.4   | 87.3   | 7.2    | 56.3   | 0.570937857 | 58.6     | 45.3     | 13.3    | 1.293598234 | 0.4414   | -1.65  |
| 161116_at   | 52.7   | 50.5   | 44.7   | 44     | 47.3   | 71.2   | 75.4   | 45.1   | 0.233878616 | 47.975   | 59.75    | 11.775  | 0.80292887  | 0.2155   | 1.216  |
| 161117_at   | 10.6   | 33.1   | 22.2   | 38     | 20.8   | 16.2   | 6.9    | 19.5   | 0.206264442 | 25.975   | 15.85    | 10.125  | 1.638801262 | 0.2644   | -1.603 |
| 161118_r_at | 0.5    | 4.1    | 0.5    | 7.6    | 8.8    | 4.1    | 10.9   | 5.5    | 0.121562496 | 3.175    | 7.325    | 4.15    | 0.433447099 | 0.1072   | 4.028  |
| 161119_at   | 73     | 40.5   | 26.9   | 37.7   | 20.4   | 66.4   | 26.8   | 37.8   | 0.655323616 | 44.525   | 37.85    | 6.675   | 1.176354029 | 0.5738   | -1.216 |
| 161120_r_at | 488.2  | 367.1  | 306.1  | 301.7  | 298.9  | 507.9  | 308.7  | 305.8  | 0.881160511 | 365.775  | 355.325  | 10.45   | 1.029409695 | 0.8392   | -1.037 |
| 161121_f_at | 360.1  | 214.5  | 243.2  | 289.4  | 178.3  | 345.6  | 310.3  | 301.4  | 0.888184465 | 276.8    | 283.9    | 7.1     | 0.974991194 | 0.9402   | 1.015  |
| 161122_f_at | 1489.2 | 1512.4 | 1212   | 1039.8 | 1503.6 | 959.4  | 1202.2 | 1310.4 | 0.680858972 | 1313.35  | 1243.9   | 69.45   | 1.055832462 | 0.6836   | -1.057 |
| 161123_i_at | 24.4   | 21.5   | 16.9   | 9.1    | 5.8    | 10.7   | 3.2    | 18.8   | 0.131698295 | 17.975   | 9.625    | 8.35    | 1.867532468 | 0.1333   | -2.157 |
| 161124_at   | 293.5  | 181.3  | 234.1  | 269.5  | 229.3  | 449.1  | 309.1  | 294.9  | 0.211178887 | 244.6    | 320.6    | 76      | 0.762944479 | 0.1906   | 1.293  |
| 161125_at   | 38.7   | 29.6   | 45.7   | 72.9   | 24.9   | 37.2   | 13.9   | 58     | 0.357734884 | 46.725   | 33.5     | 13.225  | 1.394776119 | 0.2963   | -1.506 |
| 161126_at   | 56.2   | 71.2   | 44.4   | 99.5   | 90.4   | 108.9  | 96.6   | 103.9  | 0.068088296 | 67.825   | 99.95    | 32.125  | 0.678589295 | 0.05127  | 1.538  |
| 161127_i_at | 893.5  | 959.5  | 643.9  | 830.5  | 830.8  | 868.7  | 719.1  | 878    | 0.924683678 | 831.85   | 824.15   | 7.7     | 1.009342959 | 0.9884   | 1.001  |
| 161128_r_at | 11     | 10     | 0.2    | 1      | 4.5    | 5.7    | 9.1    | 9.1    | 0.643732896 | 5.55     | 7.1      | 1.55    | 0.781690141 | 0.2848   | 3.33   |
| 161129_r_at | 1251.3 | 896.4  | 1192.1 | 1006.1 | 717.8  | 833.1  | 874.7  | 850.9  | 0.039470967 | 1086.475 | 819.125  | 267.35  | 1.326384862 | 0.02074  | -1.319 |
| 161130_f_at | 27.5   | 58.3   | 23.8   | 14.7   | 39.6   | 36.9   | 14.3   | 37.1   | 0.938862179 | 31.075   | 31.975   | 0.9     | 0.97185301  | 0.8381   | 1.083  |
| 161131_r_at | 196.7  | 117.6  | 189.8  | 121.6  | 145    | 164.4  | 83.4   | 199.9  | 0.807686619 | 156.425  | 148.175  | 8.25    | 1.055677408 | 0.7615   | -1.077 |
| 161132_at   | 1.2    | 1.9    | 12.1   | 14     | 8.6    | 19.7   | 11     | 5.1    | 0.437592202 | 7.3      | 11.1     | 3.8     | 0.657657658 | 0.2872   | 2.247  |
| 161133_at   | 223.2  | 121.8  | 127.5  | 161.9  | 117.7  | 239.3  | 146.7  | 147.7  | 0.907932418 | 158.6    | 162.85   | 4.25    | 0.973902364 | 0.9208   | 1.021  |
| 161134_at   | 118    | 131.1  | 127.3  | 87.1   | 124.3  | 178.7  | 82.3   | 109.4  | 0.746162416 | 115.875  | 123.675  | 7.8     | 0.936931474 | 0.8433   | 1.039  |
| 161135_f_at | 132.6  | 145.2  | 115.1  | 119.8  | 244    | 117.5  | 187.5  | 134    | 0.234794622 | 128.175  | 170.75   | 42.575  | 0.750658858 | 0.2003   | 1.283  |
| 161136_r_at | 27.6   | 11.3   | 14.9   | 17.1   | 10.9   | 30.4   | 16.6   | 11.2   | 0.940382436 | 17.725   | 17.275   | 0.45    | 1.026049204 | 0.8448   | -1.064 |
| 161137_r_at | 286.6  | 172.5  | 179    | 238.9  | 222.5  | 431.5  | 210.5  | 310.2  | 0.258853379 | 219.25   | 293.675  | 74.425  | 0.746573593 | 0.2349   | 1.312  |
| 161138_r_at | 98.7   | 65.9   | 48.3   | 66.7   | 39.9   | 102.6  | 19.3   | 17.7   | 0.321208146 | 69.9     | 44.875   | 25.025  | 1.557660167 | 0.1687   | -1.969 |
| 161139_f_at | 125.5  | 183.5  | 160.6  | 215.5  | 146.4  | 221.1  | 141.1  | 148.1  | 0.800417232 | 171.275  | 164.175  | 7.1     | 1.043246536 | 0.8011   | -1.042 |
| 161140_r_at | 63     | 80.1   | 104.6  | 139.4  | 131.7  | 152.3  | 156.1  | 80.9   | 0.211946166 | 96.775   | 130.25   | 33.475  | 0.742994242 | 0.2263   | 1.362  |
| 161141_r_at | 20.1   | 8      | 2.7    | 0.3    | 1.2    | 10     | 19.6   | 11.7   | 0.641356745 | 7.775    | 10.625   | 2.85    | 0.731764706 | 0.5127   | 2.112  |
| 161142_at   | 29     | 22.3   | 19.1   | 17.1   | 18.8   | 39     | 35.5   | 27.3   | 0.175255148 | 21.875   | 30.15    | 8.275   | 0.725538972 | 0.1787   | 1.355  |
| 161143_r_at | 562.9  | 485    | 360.4  | 410.7  | 339.7  | 647.3  | 386.9  | 394.6  | 0.884029862 | 454.75   | 442.125  | 12.625  | 1.028555273 | 0.7961   | -1.048 |
| 161144_r_at | 19.5   | 21.7   | 14.2   | 11.8   | 18     | 28.4   | 16.8   | 19.4   | 0.313567184 | 16.8     | 20.65    | 3.85    | 0.813559322 | 0.2811   | 1.242  |
| 161145_f_at | 363.3  | 373.4  | 387    | 499.6  | 356.6  | 370.1  | 309.1  | 407.4  | 0.283555827 | 405.825  | 360.8    | 45.025  | 1.124792129 | 0.2662   | -1.121 |
| 161146_r_at | 45.8   | 46.4   | 36.5   | 27.5   | 37.3   | 75.2   | 25     | 22.2   | 0.949732557 | 39.05    | 39.925   | 0.875   | 0.978083907 | 0.8013   | -1.083 |
| 161147_f_at | 1039.6 | 1060   | 1025.8 | 932    | 1157.2 | 961.8  | 1042.9 | 1014.2 | 0.577796408 | 1014.35  | 1044.025 | 29.675  | 0.971576351 | 0.5865   | 1.028  |
| 161148_f_at | 373.7  | 501.6  | 357.3  | 371.4  | 565.3  | 384.4  | 519.3  | 494.3  | 0.130169506 | 401      | 490.825  | 89.825  | 0.8169918   | 0.1274   | 1.224  |
| 161149_r_at | 372.8  | 256.9  | 298.4  | 279.6  | 258.7  | 395.5  | 228    | 294.2  | 0.866078633 | 301.925  | 294.1    | 7.825   | 1.026606596 | 0.7984   | 1.039  |
| 161150_at   | 18.3   | 46.5   | 21.3   | 34     | 45     | 84.8   | 14.8   | 42.5   | 0.3463481   | 30.025   | 46.775   | 16.75   | 0.641902726 | 0.4487   | 1.405  |
| 161151_at   | 16.9   | 14.2   | 9.1    | 12.5   | 9.8    | 16     | 10     | 9.5    | 0.444242857 | 13.175   | 11.325   | 1.85    | 1.163355408 | 0.4276   | -1.164 |
| 161152_r_at | 29.4   | 21.9   | 27.8   | 49.1   | 6.7    | 66.5   | 54.7   | 54.5   | 0.401898758 | 32.05    | 45.6     | 13.55   | 0.702850877 | 0.8613   | 1.109  |
| 161153_r_at | 25.2   | 19.3   | 21.3   | 18     | 13     | 50.2   | 19.3   | 23.7   | 0.546631376 | 20.95    | 26.55    | 5.6     | 0.789077213 | 0.7024   | 1.125  |
| 161154_at   | 22.2   | 21.3   | 17.8   | 18.7   | 16.8   | 32     | 20     | 19.5   | 0.592782609 | 20       | 22.075   | 2.075   | 0.906002265 | 0.6476   | 1.074  |
| 161155_r_at | 413    | 240.1  | 223.5  | 295.5  | 241    | 454.1  | 218.2  | 309.6  | 0.85880274  | 293.025  | 305.725  | 12.7    | 0.9584594   | 0.8919   | 1.031  |
| 161156_r_at | 1107.4 | 776.9  | 566.4  | 678    | 600.8  | 1177.5 | 670.6  | 670.1  | 0.989540766 | 782.175  | 779.75   | 2.425   | 1.003109971 | 0.9645   | 1.01   |
| 161157_r_at | 5.8    | 15.3   | 2.9    | 3.2    | 11.6   | 20.2   | 16.8   | 4.9    | 0.188541176 | 6.8      | 13.375   | 6.575   | 0.508411215 | 0.1623   | 2.206  |
| 161158_f_at | 2.3    | 0.8    | 2.2    | 1.3    | 0.4    | 0.9    | 1.1    | 0.5    | 0.077476485 | 1.65     | 0.725    | 0.925   | 2.275862069 | 0.04968  | -2.303 |
| 161159_r_at | 34.2   | 48.2   | 8.3    | 11.2   | 8.3    | 11.2   | 10.1   | 33.1   | 0.421123231 | 25.475   | 15.675   | 9.8     | 1.625199362 | 0.4783   | -1.489 |



|             |        |        |        |        |        |        |        |        |             |          |         |        |             |         |        |
|-------------|--------|--------|--------|--------|--------|--------|--------|--------|-------------|----------|---------|--------|-------------|---------|--------|
| 161160_f_at | 157    | 102.3  | 121.7  | 138    | 88.4   | 176.5  | 125.7  | 114.1  | 0.876430482 | 129.75   | 126.175 | 3.575  | 1.028333664 | 0.7927  | -1.048 |
| 161161_r_at | 162.1  | 87.8   | 109.7  | 173    | 118.8  | 261.2  | 187.9  | 174    | 0.199467732 | 133.15   | 185.475 | 52.325 | 0.717886508 | 0.1977  | 1.392  |
| 161162_at   | 91.1   | 64.6   | 73.4   | 44.6   | 78.5   | 118    | 69.9   | 79.4   | 0.259018244 | 68.425   | 86.45   | 18.025 | 0.791497976 | 0.2406  | 1.278  |
| 161163_at   | 10.4   | 16.5   | 15.5   | 3.9    | 4.9    | 5.4    | 6      | 12.1   | 0.239946598 | 11.575   | 7.1     | 4.475  | 1.63028169  | 0.3194  | -1.527 |
| 161164_r_at | 8.6    | 1.7    | 4.3    | 7      | 7.5    | 20.9   | 4.8    | 13.2   | 0.183467546 | 5.4      | 11.6    | 6.2    | 0.465517241 | 0.1564  | 2.18   |
| 161165_f_at | 32     | 12.2   | 24.2   | 26.3   | 24.6   | 31.5   | 13.6   | 18.1   | 0.77272143  | 23.675   | 21.95   | 1.725  | 1.078587699 | 0.8207  | -1.068 |
| 161166_i_at | 63.5   | 18.8   | 8.5    | 33.2   | 25     | 29.7   | 22.9   | 38.9   | 0.888734281 | 31       | 29.125  | 1.875  | 1.064377682 | 0.7152  | 1.184  |
| 161167_r_at | 127.5  | 40.6   | 63.3   | 87.7   | 49.4   | 139.5  | 93.1   | 82.3   | 0.682609817 | 79.775   | 91.075  | 11.3   | 0.875926434 | 0.6553  | 1.164  |
| 161168_at   | 53.8   | 23.2   | 29.3   | 29.7   | 25.1   | 60     | 32.2   | 38     | 0.650785825 | 34       | 38.825  | 4.825  | 0.875724404 | 0.6271  | 1.14   |
| 161169_f_at | 290.3  | 214.8  | 229.4  | 269.1  | 211.1  | 255.2  | 244.6  | 242.1  | 0.554109347 | 250.9    | 238.25  | 12.65  | 1.053095488 | 0.5824  | -1.048 |
| 161170_r_at | 12.9   | 7.6    | 5      | 0.9    | 1.4    | 14.2   | 3.3    | 4      | 0.826575794 | 6.6      | 5.725   | 0.875  | 1.152838428 | 0.8619  | -1.144 |
| 161171_at   | 52.7   | 41.5   | 35.7   | 51     | 52.7   | 71.1   | 33.8   | 36.7   | 0.740519594 | 45.225   | 48.575  | 3.35   | 0.931034483 | 0.8505  | 1.039  |
| 161172_f_at | 92.5   | 127.8  | 163.7  | 191.1  | 185.7  | 107.5  | 135.6  | 147.9  | 0.988649133 | 143.775  | 144.175 | 0.4    | 0.997225594 | 0.922   | 1.02   |
| 161173_f_at | 4.1    | 2.5    | 1.4    | 1.2    | 1.5    | 3.7    | 2.5    | 1.2    | 0.934338499 | 2.3      | 2.225   | 0.075  | 1.033707865 | 0.9849  | 1.008  |
| 161174_i_at | 24.6   | 18.8   | 5.6    | 15.4   | 5.7    | 27.3   | 6.3    | 4.6    | 0.479145327 | 16.1     | 10.975  | 5.125  | 1.466970387 | 0.3379  | -1.715 |
| 161175_r_at | 26.2   | 12.2   | 0.6    | 11.1   | 10.3   | 23.8   | 19     | 11.5   | 0.581424603 | 12.525   | 16.15   | 3.625  | 0.775541796 | 0.3823  | 2.238  |
| 161176_r_at | 3194.8 | 2512.1 | 2543.5 | 2590.7 | 2440.3 | 4165.2 | 2307.5 | 2019.2 | 0.966826493 | 2710.275 | 2733.05 | 22.775 | 0.991666819 | 0.8756  | -1.028 |
| 161177_f_at | 47.2   | 49.4   | 21.5   | 33.3   | 28.9   | 49.7   | 36.7   | 32.5   | 0.913853433 | 37.85    | 36.95   | 0.9    | 1.02435724  | 0.9788  | 1.006  |
| 161178_at   | 15.5   | 20.4   | 12.6   | 15.9   | 3      | 33.3   | 11.6   | 15.4   | 0.968995602 | 16.1     | 15.825  | 0.275  | 1.017377567 | 0.5626  | -1.365 |
| 161179_at   | 14.8   | 9.1    | 9.5    | 27     | 11.4   | 32     | 11.8   | 10.6   | 0.846356523 | 15.1     | 16.45   | 1.35   | 0.917933131 | 0.8503  | 1.075  |
| 161180_r_at | 13     | 10.5   | 9.8    | 19.8   | 25.8   | 58.8   | 55.1   | 15.8   | 0.093156563 | 13.275   | 38.875  | 25.6   | 0.3414791   | 0.03253 | 2.659  |
| 161181_f_at | 36.9   | 44.6   | 22.8   | 55.9   | 43.8   | 31.1   | 24.5   | 38.1   | 0.51599748  | 40.05    | 34.375  | 5.675  | 1.165090909 | 0.6041  | -1.133 |
| 161182_r_at | 5.5    | 5.4    | 3.1    | 0.3    | 3.9    | 3.4    | 0.6    | 9.8    | 0.725306997 | 3.575    | 4.425   | 0.85   | 0.807909605 | 0.7718  | 1.33   |
| 161183_at   | 347    | 465.4  | 614.3  | 747.9  | 540    | 361.6  | 618.7  | 800.3  | 0.782002145 | 543.65   | 580.15  | 36.5   | 0.937085237 | 0.7882  | 1.068  |
| 161184_f_at | 116.5  | 117.4  | 143.3  | 152.3  | 139.1  | 114.7  | 126.6  | 159.3  | 0.852914699 | 132.375  | 134.925 | 2.55   | 0.981100611 | 0.8545  | 1.019  |
| 161185_i_at | 6.6    | 4.7    | 1.2    | 2.1    | 1.4    | 2.6    | 4.1    | 0.7    | 0.360630571 | 3.65     | 2.2     | 1.45   | 1.659090909 | 0.398   | -1.639 |
| 161186_f_at | 3.7    | 4.9    | 3.6    | 4.1    | 10.6   | 16.9   | 4.1    | 3.1    | 0.246996049 | 4.075    | 8.675   | 4.6    | 0.469740634 | 0.2324  | 1.706  |
| 161187_f_at | 57.3   | 32.3   | 21.3   | 46.6   | 41.9   | 61.6   | 42.6   | 52.8   | 0.312328158 | 39.375   | 49.725  | 10.35  | 0.791855204 | 0.2697  | 1.332  |
| 161188_f_at | 19.5   | 29.4   | 15.8   | 18.3   | 17.9   | 29.1   | 14.6   | 35.5   | 0.563738719 | 20.75    | 24.275  | 3.525  | 0.854788877 | 0.6369  | 1.13   |
| 161189_r_at | 15.5   | 23.5   | 12.6   | 12.1   | 8.2    | 11.9   | 19.7   | 18.8   | 0.749956145 | 15.925   | 14.65   | 1.275  | 1.087030717 | 0.691   | -1.113 |
| 161190_r_at | 44.4   | 18.2   | 38.3   | 18.8   | 29.1   | 82.6   | 13.9   | 26.5   | 0.651139671 | 29.925   | 38.025  | 8.1    | 0.786982249 | 0.8189  | 1.11   |
| 161191_i_at | 24.1   | 20.6   | 4.6    | 2.9    | 4.9    | 10.9   | 12.8   | 2      | 0.415348643 | 13.05    | 7.65    | 5.4    | 1.705882353 | 0.5821  | -1.484 |
| 161192_at   | 74.2   | 41.5   | 51.8   | 54.6   | 49.4   | 75.4   | 78.4   | 63.5   | 0.284907214 | 55.525   | 66.675  | 11.15  | 0.832770904 | 0.2812  | 1.208  |
| 161193_r_at | 7.4    | 11.8   | 6.8    | 5.5    | 4.1    | 6.5    | 5.2    | 4.4    | 0.1285156   | 7.875    | 5.05    | 2.825  | 1.559405941 | 0.07034 | -1.522 |
| 161194_r_at | 140.3  | 80.4   | 74.4   | 92.1   | 74.7   | 192.8  | 66.5   | 82.3   | 0.836770839 | 96.8     | 104.075 | 7.275  | 0.930098487 | 0.9866  | 1.005  |
| 161195_i_at | 63.5   | 50.3   | 35.3   | 26.8   | 5.5    | 87.5   | 42.9   | 32.3   | 0.923478417 | 43.975   | 42.05   | 1.925  | 1.045778835 | 0.5641  | -1.458 |
| 161196_r_at | 300.8  | 151.3  | 160.3  | 230.3  | 229.8  | 393.5  | 299.3  | 250.1  | 0.153226572 | 210.675  | 293.175 | 82.5   | 0.718598107 | 0.1331  | 1.417  |
| 161197_r_at | 46.2   | 20.4   | 19.9   | 8.4    | 28.9   | 73.8   | 30.5   | 30.3   | 0.257659389 | 23.725   | 40.875  | 17.15  | 0.580428135 | 0.1791  | 1.882  |
| 161198_r_at | 317.3  | 140.2  | 156    | 183.7  | 161.8  | 284.1  | 170.5  | 161.7  | 0.927621746 | 199.3    | 194.525 | 4.775  | 1.024546973 | 0.9951  | 1.001  |
| 161199_at   | 198.7  | 185.4  | 159.5  | 146.3  | 182.9  | 249.9  | 191.6  | 206.6  | 0.116157723 | 172.475  | 207.75  | 35.275 | 0.830204573 | 0.1061  | 1.204  |
| 161200_i_at | 3.2    | 8.1    | 4.5    | 5.5    | 14.3   | 22     | 8.1    | 4.4    | 0.171666211 | 5.325    | 12.2    | 6.875  | 0.43647541  | 0.1266  | 2.031  |
| 161201_r_at | 534.1  | 442.9  | 365.2  | 405.4  | 280.7  | 438.3  | 337.8  | 341.4  | 0.123390955 | 436.9    | 349.55  | 87.35  | 1.249892719 | 0.1132  | -1.254 |
| 161202_r_at | 10.9   | 14.8   | 9.5    | 7.3    | 14.1   | 16.5   | 16.7   | 8.1    | 0.255544326 | 10.625   | 13.85   | 3.225  | 0.767148014 | 0.2891  | 1.298  |
| 161203_f_at | 75.1   | 18.7   | 43.9   | 50.4   | 16.4   | 57.6   | 40.8   | 66.7   | 0.9212872   | 47.025   | 45.375  | 1.65   | 1.036363636 | 0.9144  | -1.049 |
| 161204_r_at | 0.5    | 0.2    | 0.4    | 0.3    | 0.1    | 3.5    | 0.6    | 1.5    | 0.247252302 | 0.35     | 1.425   | 1.075  | 0.245614035 | 0.3754  | 2.188  |
| 161205_at   | 41.7   | 14.3   | 12.3   | 26.9   | 17.3   | 39.5   | 34.6   | 31     | 0.446902766 | 23.8     | 30.6    | 6.8    | 0.777777778 | 0.3683  | 1.388  |
| 161206_at   | 88.3   | 57     | 38.6   | 63.8   | 34.1   | 87.9   | 59.5   | 57.4   | 0.888698536 | 61.925   | 59.725  | 2.2    | 1.036835496 | 0.8611  | -1.048 |
| 161207_at   | 2.3    | 3.5    | 0.7    | 2      | 2.2    | 1.8    | 1.1    | 2.1    | 0.630702429 | 2.125    | 1.8     | 0.325  | 1.180555556 | 0.9073  | -1.048 |
| 161208_r_at | 43.1   | 12.1   | 23.5   | 56.2   | 11.9   | 83.4   | 40.3   | 19.2   | 0.802428338 | 33.725   | 38.7    | 4.975  | 0.871447028 | 0.9598  | 1.029  |
| 161209_r_at | 106.4  | 61.9   | 64.1   | 64.5   | 55.4   | 133.4  | 56.8   | 71.3   | 0.824164384 | 74.225   | 79.225  | 5      | 0.936888608 | 0.925   | 1.024  |
| 161210_f_at | 9.9    | 9.6    | 8.3    | 11.5   | 5.4    | 13     | 11.8   | 12.6   | 0.670486903 | 9.825    | 10.7    | 0.875  | 0.918224299 | 0.881   | 1.035  |
| 161211_r_at | 24.4   | 19     | 10.9   | 11.5   | 9.2    | 16.3   | 15.2   | 16     | 0.561843277 | 16.45    | 14.175  | 2.275  | 1.160493827 | 0.6376  | -1.126 |
| 161212_r_at | 1.4    | 18.2   | 1.9    | 2.5    | 0.7    | 1.9    | 0.6    | 15.9   | 0.831677995 | 6        | 4.775   | 1.225  | 1.256544503 | 0.5738  | -1.763 |
| 161213_r_at | 20.4   | 1.8    | 5.3    | 5.1    | 2.1    | 43.4   | 22.2   | 6.5    | 0.364701766 | 8.15     | 18.55   | 10.4   | 0.4393531   | 0.4693  | 1.908  |
| 161214_r_at | 299.5  | 220.6  | 415.6  | 398.1  | 408.3  | 356.7  | 273.8  | 397.9  | 0.657555193 | 333.45   | 359.175 | 25.725 | 0.928377532 | 0.6095  | 1.098  |
| 161215_at   | 25.1   | 18.5   | 35.6   | 52.2   | 26.4   | 127.1  | 35     | 37.3   | 0.400800683 | 32.85    | 56.45   | 23.6   | 0.581930912 | 0.3652  | 1.501  |



|             |       |       |       |       |       |       |       |       |             |         |         |         |             |          |        |
|-------------|-------|-------|-------|-------|-------|-------|-------|-------|-------------|---------|---------|---------|-------------|----------|--------|
| 161216_at   | 5     | 4.3   | 3.7   | 4.2   | 2.8   | 7.5   | 3.9   | 7.4   | 0.433060514 | 4.3     | 5.4     | 1.1     | 0.796296296 | 0.5578   | 1.171  |
| 161217_r_at | 172.2 | 146.1 | 108.8 | 168.3 | 107.7 | 201.3 | 117.1 | 121.5 | 0.665205056 | 148.85  | 136.9   | 11.95   | 1.087289993 | 0.591    | -1.105 |
| 161218_r_at | 2.1   | 2.1   | 2.1   | 2.6   | 1.5   | 2.8   | 1.5   | 1.5   | 0.316697563 | 2.225   | 1.825   | 0.4     | 1.219178082 | 0.1975   | -1.262 |
| 161219_r_at | 81.7  | 89.2  | 77.1  | 94.5  | 76.5  | 122.4 | 90.1  | 81    | 0.569328696 | 85.625  | 92.5    | 6.875   | 0.925675676 | 0.6009   | 1.065  |
| 161220_f_at | 81.4  | 42.7  | 76.8  | 114   | 50    | 24.8  | 119.7 | 77.6  | 0.685224817 | 78.725  | 68.025  | 10.7    | 1.157295112 | 0.5595   | -1.274 |
| 161221_f_at | 105.8 | 95.5  | 95.4  | 111.3 | 117.3 | 166.2 | 67.3  | 99.8  | 0.644945873 | 102     | 112.65  | 10.65   | 0.905459387 | 0.8026   | 1.051  |
| 161222_r_at | 29.6  | 8.8   | 8.1   | 14.8  | 12.3  | 9.6   | 7.4   | 5.8   | 0.28462391  | 15.325  | 8.775   | 6.55    | 1.746438746 | 0.2303   | -1.575 |
| 161223_r_at | 60.8  | 31.6  | 26.6  | 41    | 21.7  | 52.3  | 25.7  | 23.5  | 0.41220108  | 40      | 30.8    | 9.2     | 1.298701299 | 0.3394   | -1.325 |
| 161224_f_at | 17.2  | 21.4  | 26    | 16.4  | 11.9  | 7.6   | 5     | 25.2  | 0.186858043 | 20.25   | 12.425  | 7.825   | 1.629778672 | 0.1206   | -1.923 |
| 161225_r_at | 0.6   | 3.5   | 0.6   | 0.8   | 3.2   | 12.2  | 6.2   | 5.8   | 0.057117467 | 1.375   | 6.85    | 5.475   | 0.200729927 | 0.01163  | 5.882  |
| 161226_f_at | 58.7  | 30.9  | 18.8  | 25.7  | 31.1  | 48.8  | 28.9  | 14.5  | 0.818289264 | 33.525  | 30.825  | 2.7     | 1.087591241 | 0.827    | -1.082 |
| 161227_r_at | 570.3 | 465.7 | 524   | 449.5 | 433.2 | 540.8 | 492.5 | 479.2 | 0.66951589  | 502.375 | 486.425 | 15.95   | 1.032790255 | 0.6791   | -1.031 |
| 161228_f_at | 124.3 | 110.5 | 165.1 | 156.9 | 160.2 | 126.7 | 130.5 | 181.2 | 0.589215508 | 139.2   | 149.65  | 10.45   | 0.930170398 | 0.5786   | 1.078  |
| 161229_at   | 1.9   | 1.7   | 1.4   | 1.5   | 2.2   | 2.3   | 1.7   | 1.1   | 0.537396746 | 1.625   | 1.825   | 0.2     | 0.890410959 | 0.6592   | 1.09   |
| 161230_r_at | 17.1  | 35.1  | 24.2  | 24    | 13.4  | 17.3  | 17.5  | 27    | 0.232418035 | 25.1    | 18.8    | 6.3     | 1.335106383 | 0.2109   | -1.335 |
| 161231_r_at | 84.6  | 97.2  | 74.8  | 76.7  | 21.5  | 17.5  | 43.6  | 93.4  | 0.105957039 | 83.325  | 44      | 39.325  | 1.89375     | 0.06708  | -2.354 |
| 161232_r_at | 28.7  | 18.7  | 14.2  | 20.3  | 20    | 22.9  | 17.7  | 18.2  | 0.823602971 | 20.475  | 19.7    | 0.775   | 1.039340102 | 0.95     | 1.01   |
| 161233_at   | 9.3   | 6.6   | 4.3   | 7.2   | 6.2   | 9.9   | 6.4   | 4.5   | 0.950038565 | 6.85    | 6.75    | 0.1     | 1.014814815 | 0.9325   | 1.02   |
| 161234_f_at | 36.1  | 31.8  | 36.8  | 28.4  | 32.4  | 74.1  | 33.2  | 17.2  | 0.661438237 | 33.275  | 39.225  | 5.95    | 0.848311026 | 0.9179   | 1.033  |
| 161235_f_at | 333.6 | 281.8 | 269.8 | 283   | 275.5 | 317.4 | 299.5 | 276.7 | 0.990123332 | 292.05  | 292.275 | 0.225   | 0.999230177 | 0.9692   | 1.002  |
| 161236_r_at | 15.4  | 16.2  | 12    | 13.5  | 9.4   | 13.2  | 12.4  | 10.5  | 0.065054863 | 14.275  | 11.375  | 2.9     | 1.254945055 | 0.06881  | -1.258 |
| 161237_at   | 105.9 | 47.1  | 77.2  | 61.9  | 59.9  | 117   | 75.6  | 63.5  | 0.753259184 | 73.025  | 79      | 5.975   | 0.924367089 | 0.7202   | 1.09   |
| 161238_f_at | 827.9 | 513.9 | 306.7 | 493.2 | 525.4 | 880.9 | 429.1 | 488.3 | 0.769763183 | 535.425 | 580.925 | 45.5    | 0.921676636 | 0.7039   | 1.108  |
| 161239_r_at | 6.9   | 8     | 9     | 8.5   | 9.8   | 23.8  | 8.3   | 4.1   | 0.485469079 | 8.1     | 11.5    | 3.4     | 0.704347826 | 0.6706   | 1.177  |
| 161240_f_at | 62.8  | 59.6  | 68    | 61    | 84.3  | 97.2  | 63.1  | 86.2  | 0.064622427 | 62.85   | 82.7    | 19.85   | 0.759975816 | 0.03314  | 1.302  |
| 161241_at   | 10.3  | 7.9   | 31.9  | 6.1   | 40.6  | 32.2  | 5.8   | 24.4  | 0.268567041 | 14.05   | 25.75   | 11.7    | 0.545631068 | 0.3227   | 1.845  |
| 161242_f_at | 33.6  | 6     | 10.6  | 9.6   | 7.9   | 14    | 5.5   | 25.3  | 0.826010811 | 14.95   | 13.175  | 1.775   | 1.134724858 | 0.8915   | -1.073 |
| 161243_f_at | 121.7 | 168.3 | 164   | 174   | 171.7 | 95    | 125.5 | 164.6 | 0.44413804  | 157     | 139.2   | 17.8    | 1.127873563 | 0.4231   | -1.147 |
| 161244_f_at | 73.6  | 41.5  | 50.8  | 42.6  | 36.2  | 100.5 | 63    | 55.1  | 0.488768023 | 52.125  | 63.7    | 11.575  | 0.818288854 | 0.5407   | 1.175  |
| 161245_r_at | 16.4  | 19.4  | 16    | 5     | 7.5   | 23.1  | 3.1   | 10.2  | 0.569506689 | 14.2    | 10.975  | 3.225   | 1.293849658 | 0.4879   | -1.468 |
| 161246_at   | 14.9  | 54.1  | 26    | 32.2  | 30.3  | 16.7  | 11.9  | 46.7  | 0.651369568 | 31.8    | 26.4    | 5.4     | 1.204545455 | 0.6102   | -1.243 |
| 161247_f_at | 196.6 | 213.9 | 229.4 | 237.8 | 191.6 | 244.1 | 196.9 | 232.4 | 0.848414731 | 219.425 | 216.25  | 3.175   | 1.014682081 | 0.8207   | 1.017  |
| 161248_r_at | 43.3  | 21.7  | 4.9   | 18    | 4.3   | 8.5   | 36.6  | 9.7   | 0.531850173 | 21.975  | 14.775  | 7.2     | 1.487309645 | 0.496    | -1.587 |
| 161249_at   | 217.5 | 208.8 | 124.3 | 138.3 | 107.5 | 245.7 | 121.3 | 135.8 | 0.638496393 | 172.225 | 152.575 | 19.65   | 1.12878912  | 0.5521   | -1.157 |
| 161250_at   | 193.1 | 148.1 | 140   | 209.3 | 198.3 | 219.3 | 197   | 177.8 | 0.242950683 | 172.625 | 198.1   | 25.475  | 0.871403332 | 0.2138   | 1.161  |
| 161251_f_at | 3.7   | 37.1  | 7.6   | 5.8   | 31.4  | 13.5  | 38.4  | 34.3  | 0.156225876 | 13.55   | 29.4    | 15.85   | 0.460884354 | 0.08765  | 3.102  |
| 161252_r_at | 154.5 | 77.2  | 65.7  | 76    | 56.4  | 148   | 46.4  | 66    | 0.66485864  | 93.35   | 79.2    | 14.15   | 1.178661616 | 0.5319   | -1.235 |
| 161253_i_at | 153.1 | 99.4  | 110.5 | 130.8 | 87    | 193.4 | 116.9 | 118.2 | 0.84128815  | 123.45  | 128.875 | 5.425   | 0.957904947 | 0.9447   | 1.014  |
| 161254_r_at | 62.6  | 42.1  | 28.4  | 25.3  | 46.8  | 57.5  | 31.1  | 49.2  | 0.545425793 | 39.6    | 46.15   | 6.55    | 0.858071506 | 0.4571   | 1.214  |
| 161255_at   | 70    | 70    | 69.8  | 48.4  | 68.2  | 41.8  | 69.9  | 77.7  | 0.987961055 | 64.55   | 64.4    | 0.15    | 1.002329193 | 0.9233   | -1.017 |
| 161256_at   | 26    | 25.9  | 8.9   | 19.2  | 18.4  | 32.5  | 26.3  | 13.7  | 0.654877568 | 20      | 22.725  | 2.725   | 0.880088009 | 0.6354   | 1.171  |
| 161257_r_at | 174.2 | 125.4 | 79.6  | 100.5 | 99.8  | 214   | 110   | 121.2 | 0.641950057 | 119.925 | 136.25  | 16.325  | 0.880183486 | 0.628    | 1.13   |
| 161258_at   | 263.9 | 166.8 | 160.9 | 208.5 | 190.2 | 352.1 | 187.8 | 171   | 0.62748636  | 200.025 | 225.275 | 25.25   | 0.887914771 | 0.6575   | 1.098  |
| 161259_f_at | 755.6 | 874.3 | 687.1 | 764.3 | 836.3 | 643.9 | 688.2 | 684.4 | 0.35756741  | 770.325 | 713.2   | 57.125  | 1.080096747 | 0.3389   | -1.081 |
| 161260_f_at | 23.9  | 26.5  | 13.9  | 29    | 12.7  | 15    | 12    | 18.9  | 0.072641724 | 23.325  | 14.65   | 8.675   | 1.592150171 | 0.06263  | -1.559 |
| 161261_f_at | 333.8 | 542.1 | 496.7 | 495.5 | 673.7 | 500.5 | 594.7 | 599.5 | 0.076738065 | 467.025 | 592.1   | 125.075 | 0.788760345 | 0.09336  | 1.282  |
| 161262_r_at | 7.2   | 4.2   | 19.3  | 20    | 8     | 24.1  | 9.5   | 4.8   | 0.861680066 | 12.675  | 11.6    | 1.075   | 1.092672414 | 0.8906   | -1.076 |
| 161263_f_at | 279.7 | 301   | 294.9 | 307.8 | 366.7 | 324.7 | 369.9 | 325.6 | 0.018629326 | 295.85  | 346.725 | 50.875  | 0.853269882 | 0.008983 | 1.17   |
| 161264_f_at | 503   | 518   | 399.2 | 549.6 | 518.4 | 578.1 | 327.8 | 350.2 | 0.51865707  | 492.45  | 443.625 | 48.825  | 1.110059172 | 0.4506   | -1.135 |
| 161265_f_at | 181.4 | 143.6 | 111.2 | 129.1 | 126.2 | 223.2 | 141.3 | 141.8 | 0.553581085 | 141.325 | 158.125 | 16.8    | 0.893754941 | 0.5516   | 1.108  |
| 161266_r_at | 34.3  | 20.7  | 11.9  | 21.1  | 11.4  | 38.4  | 9.6   | 8.1   | 0.574872292 | 22      | 16.875  | 5.125   | 1.303703704 | 0.3571   | -1.513 |
| 161267_f_at | 238.3 | 101.4 | 111.8 | 105   | 107.4 | 172.6 | 114.3 | 110.4 | 0.740242506 | 139.125 | 126.175 | 12.95   | 1.102635229 | 0.8426   | -1.049 |
| 161268_f_at | 32    | 15.9  | 32.3  | 43.8  | 32    | 49.6  | 28.4  | 30.4  | 0.606457473 | 31      | 35.1    | 4.1     | 0.883190883 | 0.5388   | 1.176  |
| 161269_i_at | 44.9  | 46.4  | 37.7  | 62.6  | 46.8  | 43.5  | 51.8  | 53.1  | 0.882270318 | 47.9    | 48.8    | 0.9     | 0.981557377 | 0.7858   | 1.033  |
| 161270_i_at | 61.4  | 75.6  | 64.5  | 224.1 | 34.4  | 44.9  | 191   | 167.3 | 0.959417704 | 106.4   | 109.4   | 3       | 0.972577697 | 0.8913   | -1.079 |
| 161271_r_at | 9.6   | 5.6   | 4.7   | 5.5   | 1.8   | 9     | 4.4   | 4.9   | 0.503509789 | 6.35    | 5.025   | 1.325   | 1.263681592 | 0.3838   | -1.411 |



|             |        |        |        |        |        |        |        |        |             |         |          |         |             |         |        |
|-------------|--------|--------|--------|--------|--------|--------|--------|--------|-------------|---------|----------|---------|-------------|---------|--------|
| 161272_f_at | 153.4  | 136    | 200.8  | 293    | 203.3  | 116.4  | 141.5  | 204.7  | 0.512180372 | 195.8   | 166.475  | 29.325  | 1.176152575 | 0.5326  | -1.157 |
| 161273_f_at | 37     | 53     | 48.2   | 54.3   | 64.6   | 76.5   | 47.8   | 62     | 0.091834633 | 48.125  | 62.725   | 14.6    | 0.767237943 | 0.09276 | 1.299  |
| 161274_at   | 41.8   | 15.2   | 8.9    | 9.9    | 3.3    | 11.9   | 9      | 9.9    | 0.273011386 | 18.95   | 8.525    | 10.425  | 2.2228739   | 0.1804  | -2     |
| 161275_at   | 50.4   | 39.4   | 44.8   | 44.9   | 49.3   | 67.9   | 44.4   | 31.8   | 0.682454963 | 44.875  | 48.35    | 3.475   | 0.928128232 | 0.8091  | 1.042  |
| 161276_i_at | 9.8    | 12.7   | 19.3   | 37.6   | 30.7   | 37.8   | 15     | 4.6    | 0.831394028 | 19.85   | 22.025   | 2.175   | 0.901248581 | 0.958   | -1.031 |
| 161277_r_at | 6.2    | 10.3   | 2.7    | 4.3    | 4.9    | 5.8    | 6.8    | 2.2    | 0.640987438 | 5.875   | 4.925    | 0.95    | 1.192893401 | 0.7161  | -1.154 |
| 161278_r_at | 32.7   | 32.5   | 16.3   | 9.8    | 9.3    | 29.7   | 3.4    | 21     | 0.431043033 | 22.825  | 15.85    | 6.975   | 1.440063091 | 0.3787  | -1.707 |
| 161279_f_at | 27.8   | 29.4   | 34     | 50.2   | 30.7   | 34.6   | 58.7   | 37.3   | 0.562417621 | 35.35   | 40.325   | 4.975   | 0.876627402 | 0.538   | 1.135  |
| 161280_r_at | 294.5  | 191.8  | 181.3  | 239.2  | 68.9   | 299.4  | 143.4  | 168.7  | 0.350824983 | 226.7   | 170.1    | 56.6    | 1.332745444 | 0.2634  | -1.488 |
| 161281_f_at | 11.4   | 8      | 5.5    | 8.4    | 5.7    | 13.3   | 8      | 6.1    | 0.982090701 | 8.325   | 8.275    | 0.05    | 1.006042296 | 0.9074  | -1.03  |
| 161282_r_at | 214.2  | 88.1   | 106.3  | 42.8   | 92.2   | 264.7  | 109.2  | 133.6  | 0.513888405 | 112.85  | 149.925  | 37.075  | 0.752709688 | 0.4121  | 1.427  |
| 161283_i_at | 4.1    | 4.7    | 3      | 6.3    | 5.6    | 9      | 2.5    | 0.8    | 0.980646849 | 4.525   | 4.475    | 0.05    | 1.011173184 | 0.5906  | -1.363 |
| 161284_r_at | 774.1  | 734.5  | 533.6  | 596    | 802    | 1174.3 | 429.6  | 773.6  | 0.453659908 | 659.55  | 794.875  | 135.325 | 0.829753106 | 0.5649  | 1.147  |
| 161285_r_at | 34.3   | 11.9   | 8.5    | 12.2   | 9.8    | 56.7   | 34.3   | 51.1   | 0.142248656 | 16.725  | 37.975   | 21.25   | 0.44042133  | 0.1701  | 2.19   |
| 161286_f_at | 48.5   | 34.1   | 17.6   | 27.7   | 26     | 42.9   | 23.7   | 30.4   | 0.880502025 | 31.975  | 30.75    | 1.225   | 1.039837398 | 0.993   | 1.002  |
| 161287_f_at | 270.7  | 433.1  | 474.8  | 433.5  | 547.7  | 300.7  | 500.5  | 414.3  | 0.612471093 | 403.025 | 440.8    | 37.775  | 0.914303539 | 0.6531  | 1.091  |
| 161288_r_at | 5.6    | 4.5    | 1.6    | 7.1    | 2.9    | 8.3    | 4.5    | 3.7    | 0.931256297 | 4.7     | 4.85     | 0.15    | 0.969072165 | 0.8478  | 1.082  |
| 161289_at   | 30.7   | 8.4    | 20.8   | 3.9    | 8.8    | 25.4   | 14.6   | 4.1    | 0.733667858 | 15.95   | 13.225   | 2.725   | 1.206049149 | 0.8594  | -1.118 |
| 161290_r_at | 1      | 4.4    | 0.5    | 0.4    | 2.1    | 1.8    | 1.2    | 0.8    | 0.925324641 | 1.575   | 1.475    | 0.1     | 1.06779661  | 0.5396  | 1.465  |
| 161291_at   | 17.8   | 16.3   | 6.6    | 3.7    | 12.7   | 25.4   | 7.6    | 1.8    | 0.903942767 | 11.1    | 11.875   | 0.775   | 0.934736842 | 0.8696  | -1.122 |
| 161292_f_at | 271.5  | 363.1  | 393.7  | 567.9  | 409.9  | 334.3  | 291.8  | 381.7  | 0.542938184 | 399.05  | 354.425  | 44.625  | 1.125908161 | 0.6074  | -1.096 |
| 161293_r_at | 2.2    | 23.8   | 6.5    | 9      | 21.3   | 37.7   | 15     | 24.6   | 0.077150587 | 10.375  | 24.65    | 14.275  | 0.420892495 | 0.07296 | 3.144  |
| 161294_f_at | 4405.1 | 4593   | 3350.5 | 3476.2 | 3985.8 | 3138.5 | 3042.7 | 3317.5 | 0.18303175  | 3956.2  | 3371.125 | 585.075 | 1.173554822 | 0.1721  | -1.169 |
| 161295_r_at | 6.1    | 8.2    | 0.2    | 0.1    | 0.2    | 0.8    | 0.4    | 0.1    | 0.211037006 | 3.65    | 0.375    | 3.275   | 9.733333333 | 0.3166  | -3.507 |
| 161296_r_at | 7.1    | 2.5    | 3.2    | 3.8    | 4.8    | 6.9    | 0.7    | 1.4    | 0.708979857 | 4.15    | 3.45     | 0.7     | 1.202898551 | 0.4355  | -1.633 |
| 161297_f_at | 110.8  | 94.1   | 94.6   | 120.5  | 96.7   | 128.9  | 76.6   | 124    | 0.915604109 | 105     | 106.55   | 1.55    | 0.985452839 | 0.9947  | -1.001 |
| 161298_i_at | 48.7   | 5.1    | 4.8    | 17.2   | 15.8   | 10.7   | 22.2   | 16.5   | 0.817198977 | 18.95   | 16.3     | 2.65    | 1.162576687 | 0.6481  | 1.315  |
| 161299_r_at | 12     | 13.6   | 12.8   | 9.4    | 14.3   | 20.2   | 8.7    | 7.8    | 0.804964134 | 11.95   | 12.75    | 0.8     | 0.937254902 | 0.9952  | 1.001  |
| 161300_r_at | 7.3    | 3.7    | 14.4   | 9.4    | 10     | 9.8    | 22.3   | 9.1    | 0.335779352 | 8.7     | 12.8     | 4.1     | 0.6796875   | 0.2741  | 1.534  |
| 161301_f_at | 92.4   | 114.4  | 80     | 95.5   | 124.7  | 71.3   | 84.5   | 84.5   | 0.763142329 | 95.575  | 91.25    | 4.325   | 1.04739726  | 0.6799  | -1.062 |
| 161302_r_at | 34.4   | 40.1   | 39.3   | 35.2   | 27.5   | 46.6   | 49     | 60     | 0.29824691  | 37.25   | 45.775   | 8.525   | 0.813762971 | 0.3539  | 1.187  |
| 161303_at   | 39.5   | 91.4   | 68.4   | 66.9   | 84.2   | 14.3   | 64.8   | 89.3   | 0.87255961  | 66.55   | 63.15    | 3.4     | 1.053840063 | 0.6593  | -1.241 |
| 161304_r_at | 1022.3 | 808.2  | 745.6  | 1050.3 | 659.4  | 1200.8 | 666    | 620.8  | 0.484550095 | 906.6   | 786.75   | 119.85  | 1.152335558 | 0.3722  | -1.186 |
| 161305_r_at | 16.2   | 2.1    | 7.7    | 8.1    | 11.6   | 3.7    | 9.6    | 2.5    | 0.663678843 | 8.525   | 6.85     | 1.675   | 1.244525547 | 0.7491  | -1.208 |
| 161306_r_at | 0.2    | 0.1    | 0.2    | 2.6    | 0.3    | 13.1   | 0.2    | 0.4    | 0.460473012 | 0.775   | 3.5      | 2.725   | 0.221428571 | 0.4826  | 2.497  |
| 161307_f_at | 66.1   | 83.9   | 44.3   | 49.4   | 42.3   | 76.9   | 48.7   | 60.4   | 0.754562862 | 60.925  | 57.075   | 3.85    | 1.067455103 | 0.7713  | -1.061 |
| 161308_f_at | 70.5   | 59.9   | 66.6   | 96.4   | 53.8   | 78.3   | 99.8   | 86.9   | 0.631955261 | 73.35   | 79.7     | 6.35    | 0.920326223 | 0.6702  | 1.078  |
| 161309_r_at | 9      | 1.6    | 6.1    | 3.1    | 7.4    | 18.3   | 0.9    | 1.2    | 0.672463467 | 4.95    | 6.95     | 2       | 0.712230216 | 0.8524  | -1.172 |
| 161310_at   | 20.4   | 20     | 36.6   | 29.2   | 13.5   | 21.6   | 20.4   | 20     | 0.149878178 | 26.55   | 18.875   | 7.675   | 1.406622517 | 0.1239  | -1.384 |
| 161311_at   | 27.3   | 50.7   | 15.1   | 23.2   | 9.2    | 15.8   | 12.9   | 24.9   | 0.182237541 | 29.075  | 15.7     | 13.375  | 1.851910828 | 0.1216  | -1.797 |
| 161312_r_at | 3.7    | 2.1    | 3.7    | 1.7    | 3.1    | 14.5   | 3.5    | 1.9    | 0.391622628 | 2.8     | 5.75     | 2.95    | 0.486956522 | 0.3744  | 1.584  |
| 161313_at   | 12.2   | 1.8    | 3.3    | 4.4    | 2.3    | 3      | 7.6    | 11.8   | 0.822852754 | 5.425   | 6.175    | 0.75    | 0.87854251  | 0.7883  | 1.17   |
| 161314_r_at | 50.1   | 22.2   | 40.4   | 38.5   | 31.3   | 55.3   | 37.4   | 47.6   | 0.540932291 | 37.8    | 42.9     | 5.1     | 0.881118881 | 0.5269  | 1.155  |
| 161315_i_at | 40.2   | 9.4    | 17.1   | 25.5   | 13.6   | 53.9   | 34.9   | 36.1   | 0.316911501 | 23.05   | 34.625   | 11.575  | 0.665703971 | 0.348   | 1.54   |
| 161316_f_at | 334.9  | 428.4  | 393    | 500.5  | 466.5  | 441    | 540.2  | 493.1  | 0.141064374 | 414.2   | 485.2    | 71      | 0.85366859  | 0.1293  | 1.18   |
| 161317_r_at | 59.1   | 50.6   | 37     | 41.9   | 32.9   | 46.1   | 37.5   | 30.3   | 0.136655159 | 47.15   | 36.7     | 10.45   | 1.284741144 | 0.1239  | -1.281 |
| 161318_f_at | 74.5   | 67.7   | 101.3  | 129.6  | 86.5   | 58.7   | 82.6   | 120.1  | 0.750914335 | 93.275  | 86.975   | 6.3     | 1.072434608 | 0.7541  | -1.071 |
| 161319_at   | 81.4   | 15     | 33.1   | 42.4   | 33.6   | 52.8   | 30     | 67     | 0.868255144 | 42.975  | 45.85    | 2.875   | 0.937295529 | 0.6611  | 1.201  |
| 161320_r_at | 54.6   | 22.3   | 37.6   | 35.4   | 15.8   | 39.3   | 36     | 27.1   | 0.387022974 | 37.475  | 29.55    | 7.925   | 1.268189509 | 0.4076  | -1.278 |
| 161321_i_at | 7.1    | 5.2    | 23.8   | 3.6    | 3.5    | 32.6   | 4.7    | 23.8   | 0.499643269 | 9.925   | 16.15    | 6.225   | 0.614551084 | 0.6336  | 1.419  |
| 161322_r_at | 7.8    | 2.8    | 5.7    | 5.4    | 5      | 8.7    | 9.2    | 2.5    | 0.644882736 | 5.425   | 6.35     | 0.925   | 0.854330709 | 0.7883  | 1.11   |
| 161323_f_at | 24.1   | 5      | 14     | 25.7   | 4.8    | 6.9    | 6.9    | 4      | 0.094787006 | 17.2    | 5.65     | 11.55   | 3.044247788 | 0.05354 | -2.631 |
| 161324_r_at | 89.5   | 58.7   | 51.8   | 63.6   | 45.1   | 83     | 54.9   | 45.7   | 0.498794224 | 65.9    | 57.175   | 8.725   | 1.152601662 | 0.4379  | -1.165 |
| 161325_at   | 391.3  | 262.4  | 266.4  | 336.4  | 275.2  | 432.5  | 293.3  | 327.2  | 0.714976564 | 314.125 | 332.05   | 17.925  | 0.946017166 | 0.7105  | 1.056  |
| 161326_f_at | 59.2   | 40.8   | 32.8   | 55.3   | 31.6   | 54.3   | 52.8   | 20.8   | 0.514200646 | 47.025  | 39.875   | 7.15    | 1.179310345 | 0.4601  | -1.235 |
| 161327_f_at | 6726.6 | 9385.8 | 5841.4 | 7001.2 | 8235.6 | 6530.5 | 6310.9 | 7516.5 | 0.922253707 | 7238.75 | 7148.375 | 90.375  | 1.012642733 | 0.9804  | 1.003  |



|             |        |        |        |        |        |        |        |        |             |         |         |         |             |         |        |
|-------------|--------|--------|--------|--------|--------|--------|--------|--------|-------------|---------|---------|---------|-------------|---------|--------|
| 161328_i_at | 31.4   | 72.9   | 34.5   | 99.6   | 112.7  | 62.4   | 157.3  | 171.5  | 0.072410809 | 59.6    | 125.975 | 66.375  | 0.473109744 | 0.07152 | 2.215  |
| 161329_f_at | 1135.6 | 1311.8 | 1055.4 | 821.8  | 1243.2 | 895.7  | 956.8  | 945.7  | 0.603066183 | 1081.15 | 1010.35 | 70.8    | 1.070074727 | 0.629   | -1.064 |
| 161330_r_at | 20.5   | 27.2   | 28.7   | 24.2   | 26.2   | 30.6   | 26.9   | 21.6   | 0.665598762 | 25.15   | 26.325  | 1.175   | 0.955365622 | 0.6673  | 1.048  |
| 161331_r_at | 35.3   | 23.4   | 14.4   | 17.4   | 0.8    | 36.4   | 14.9   | 30.6   | 0.841980623 | 22.625  | 20.675  | 1.95    | 1.094316808 | 0.478   | -1.981 |
| 161332_f_at | 317.9  | 232.6  | 282.1  | 334.6  | 276.8  | 272.9  | 347    | 313    | 0.72280463  | 291.8   | 302.425 | 10.625  | 0.964867322 | 0.6952  | 1.041  |
| 161333_f_at | 89.2   | 85.9   | 58.6   | 63.2   | 59.9   | 115.8  | 81.1   | 71.8   | 0.603280502 | 74.225  | 82.15   | 7.925   | 0.903530128 | 0.6319  | 1.092  |
| 161334_r_at | 109.9  | 76.7   | 62.6   | 97.9   | 65.7   | 163.8  | 75.7   | 96.3   | 0.606191824 | 86.775  | 100.375 | 13.6    | 0.864508095 | 0.6756  | 1.11   |
| 161335_r_at | 12.2   | 17.5   | 3.4    | 15.8   | 14     | 9.3    | 14.8   | 21.9   | 0.522499562 | 12.225  | 15      | 2.775   | 0.815       | 0.4661  | 1.386  |
| 161336_r_at | 3.8    | 3.2    | 2.6    | 2.7    | 2.6    | 4.5    | 2.8    | 3      | 0.781441205 | 3.075   | 3.225   | 0.15    | 0.953488372 | 0.847   | 1.031  |
| 161337_f_at | 129.4  | 162.3  | 80.6   | 161.7  | 118.9  | 117.5  | 138.4  | 130.5  | 0.739284804 | 133.5   | 126.325 | 7.175   | 1.056797942 | 0.9083  | 1.021  |
| 161338_i_at | 255.5  | 247.3  | 257.2  | 233.2  | 291.8  | 233.9  | 181    | 252    | 0.73710547  | 248.3   | 239.675 | 8.625   | 1.035986231 | 0.6482  | -1.05  |
| 161339_f_at | 98.2   | 42.1   | 52.6   | 64.2   | 16.8   | 102.3  | 64.3   | 67.5   | 0.944813538 | 64.275  | 62.725  | 1.55    | 1.02471104  | 0.7288  | -1.17  |
| 161340_r_at | 3.8    | 5.9    | 4.1    | 3.3    | 3.1    | 5.2    | 4.8    | 2.1    | 0.625687678 | 4.275   | 3.8     | 0.475   | 1.125       | 0.5588  | -1.163 |
| 161341_f_at | 88.6   | 80.8   | 96.9   | 120.2  | 140.1  | 106.1  | 116    | 116.8  | 0.084870154 | 96.625  | 119.75  | 23.125  | 0.806889353 | 0.07618 | 1.247  |
| 161342_r_at | 758.6  | 937.4  | 909.9  | 1085   | 830.2  | 757.1  | 1127.3 | 1054.9 | 0.865534966 | 922.725 | 942.375 | 19.65   | 0.979148428 | 0.9004  | 1.016  |
| 161343_r_at | 25.6   | 3.8    | 12.6   | 2.8    | 5.3    | 10.1   | 3.9    | 3.4    | 0.379250228 | 11.2    | 5.675   | 5.525   | 1.973568282 | 0.5186  | -1.476 |
| 161344_r_at | 43.5   | 62     | 29.3   | 31.2   | 45.1   | 74.9   | 35.7   | 82.8   | 0.239248664 | 41.5    | 59.625  | 18.125  | 0.696016771 | 0.2348  | 1.42   |
| 161345_f_at | 163.7  | 224.2  | 198.3  | 193    | 310.6  | 279    | 214.9  | 224.4  | 0.06459327  | 194.8   | 257.225 | 62.425  | 0.757313636 | 0.04655 | 1.314  |
| 161346_f_at | 14.4   | 17.8   | 12.9   | 11.6   | 37.3   | 8.4    | 12.2   | 12.7   | 0.639894662 | 14.175  | 17.65   | 3.475   | 0.803116147 | 0.8595  | 1.063  |
| 161347_r_at | 286.1  | 194.2  | 225.5  | 283.9  | 223    | 356.8  | 198.8  | 206.3  | 0.979088871 | 247.425 | 246.225 | 1.2     | 1.004873591 | 0.9001  | -1.022 |
| 161348_r_at | 222    | 140    | 124.8  | 180.8  | 120.9  | 230.2  | 149.5  | 142.8  | 0.858010121 | 166.9   | 160.85  | 6.05    | 1.037612683 | 0.8331  | -1.042 |
| 161349_f_at | 281.4  | 327.8  | 265.2  | 271.3  | 392.9  | 274.4  | 263.3  | 325.1  | 0.44565089  | 286.425 | 313.925 | 27.5    | 0.912399458 | 0.4538  | 1.086  |
| 161350_f_at | 55.3   | 59.4   | 38.1   | 48.5   | 33.7   | 54.3   | 33.8   | 49.7   | 0.334689197 | 50.325  | 42.875  | 7.45    | 1.173760933 | 0.3281  | -1.185 |
| 161351_r_at | 2.3    | 0.7    | 0.9    | 2.4    | 1      | 3.6    | 1      | 1.6    | 0.778933763 | 1.575   | 1.8     | 0.225   | 0.875       | 0.827   | 1.106  |
| 161352_r_at | 78.8   | 58.1   | 47.4   | 16.2   | 38.1   | 67.2   | 50     | 21     | 0.724017653 | 50.125  | 44.075  | 6.05    | 1.137266024 | 0.8782  | -1.07  |
| 161353_r_at | 1      | 2.4    | 1.2    | 1.8    | 0.6    | 6.9    | 11.1   | 2.6    | 0.211612885 | 1.6     | 5.3     | 3.7     | 0.301886792 | 0.2907  | 2.16   |
| 161354_f_at | 208    | 204.8  | 216.3  | 237.3  | 237.1  | 218.1  | 231.1  | 267    | 0.142765387 | 216.6   | 238.325 | 21.725  | 0.908842967 | 0.1305  | 1.099  |
| 161355_f_at | 118.1  | 96.7   | 143.6  | 207.2  | 120.2  | 122.7  | 139.3  | 154.9  | 0.793075665 | 141.4   | 134.275 | 7.125   | 1.053062744 | 0.9264  | -1.017 |
| 161356_at   | 58     | 50.7   | 32.7   | 67.5   | 39.5   | 81.9   | 22.5   | 25.8   | 0.557746863 | 52.225  | 42.425  | 9.8     | 1.230995875 | 0.3844  | -1.363 |
| 161357_r_at | 414.1  | 138.9  | 287.5  | 297    | 243.9  | 389.4  | 285.5  | 307.9  | 0.743407172 | 284.375 | 306.675 | 22.3    | 0.927284585 | 0.6153  | 1.142  |
| 161358_r_at | 271.4  | 152.6  | 153.5  | 183.8  | 147.8  | 291.1  | 194    | 192.2  | 0.712018828 | 190.325 | 206.275 | 15.95   | 0.922676039 | 0.6981  | 1.082  |
| 161359_s_at | 4076.4 | 4285.2 | 2661.6 | 2296.6 | 4026.9 | 3428.4 | 2475   | 2763.1 | 0.806297852 | 3329.95 | 3173.35 | 156.6   | 1.04934848  | 0.8762  | -1.031 |
| 161360_at   | 56.4   | 40.3   | 94.2   | 134.4  | 104.4  | 110.4  | 79.8   | 118.3  | 0.388009009 | 81.325  | 103.225 | 21.9    | 0.787842093 | 0.2809  | 1.395  |
| 161361_s_at | 465.9  | 475.9  | 342.9  | 391.4  | 581.2  | 535    | 439.7  | 531.1  | 0.055598196 | 419.025 | 521.75  | 102.725 | 0.803114518 | 0.0618  | 1.25   |
| 161362_at   | 13.2   | 7.3    | 8.9    | 10.2   | 9.4    | 14.1   | 8.6    | 10.5   | 0.681913146 | 9.9     | 10.65   | 0.75    | 0.929577465 | 0.6406  | 1.085  |
| 161363_r_at | 532.9  | 370.1  | 315.4  | 428    | 258.4  | 511.9  | 344.5  | 351.6  | 0.546731033 | 411.6   | 366.6   | 45      | 1.122749591 | 0.505   | -1.135 |
| 161364_f_at | 280.8  | 265.8  | 241.6  | 281    | 352.4  | 270.2  | 258.4  | 257.5  | 0.520280396 | 267.3   | 284.625 | 17.325  | 0.939130435 | 0.5243  | 1.058  |
| 161365_r_at | 12.9   | 45.1   | 36.2   | 32     | 6.4    | 63.5   | 55.4   | 8.6    | 0.912801817 | 31.55   | 33.475  | 1.925   | 0.942494399 | 0.6549  | -1.367 |
| 161366_r_at | 5.4    | 22.1   | 3.5    | 2.6    | 2.4    | 29.6   | 5      | 43     | 0.341454134 | 8.4     | 20      | 11.6    | 0.42        | 0.4699  | 1.911  |
| 161367_f_at | 296.3  | 295.8  | 268.2  | 365.3  | 186.1  | 297.2  | 230.9  | 273.2  | 0.113753023 | 306.4   | 246.85  | 59.55   | 1.241239619 | 0.115   | -1.252 |
| 161368_r_at | 3.5    | 3.6    | 0.3    | 0.4    | 0.1    | 0.2    | 0.3    | 0.2    | 0.154542569 | 1.95    | 0.2     | 1.75    | 9.75        | 0.04204 | -5.586 |
| 161369_r_at | 29.2   | 10.9   | 4.3    | 26.3   | 19.9   | 31.8   | 14.6   | 9.1    | 0.88413044  | 17.675  | 18.85   | 1.175   | 0.937665782 | 0.6946  | 1.239  |
| 161370_f_at | 121.7  | 127.1  | 131.4  | 75     | 65.4   | 76.7   | 106.8  | 87.8   | 0.116398001 | 113.8   | 84.175  | 29.625  | 1.351945352 | 0.1312  | -1.341 |
| 161371_r_at | 1.9    | 10.5   | 7.3    | 4.1    | 8.2    | 11     | 1      | 8.7    | 0.672168613 | 5.95    | 7.225   | 1.275   | 0.823529412 | 0.9309  | 1.063  |
| 161372_f_at | 26.5   | 5.7    | 8.6    | 11.3   | 10.4   | 7.3    | 2.3    | 15.1   | 0.464961697 | 13.025  | 8.775   | 4.25    | 1.484330484 | 0.4378  | -1.546 |
| 161373_r_at | 23.5   | 44.7   | 6      | 13     | 8.3    | 22.2   | 11.6   | 8.2    | 0.367621582 | 21.8    | 12.575  | 9.225   | 1.73359841  | 0.4609  | -1.469 |
| 161374_f_at | 42.1   | 51.6   | 64.7   | 66.6   | 41     | 57.1   | 42.7   | 67.9   | 0.652344944 | 56.25   | 52.175  | 4.075   | 1.07810254  | 0.6371  | -1.084 |
| 161375_at   | 26.2   | 9.7    | 11.6   | 23.9   | 7.2    | 36.7   | 3.1    | 7.7    | 0.657098412 | 17.85   | 13.675  | 4.175   | 1.305301645 | 0.3313  | -1.833 |
| 161376_f_at | 17.1   | 30.1   | 30     | 28.5   | 33.9   | 56.6   | 18.8   | 18.9   | 0.586012199 | 26.425  | 32.05   | 5.625   | 0.82449298  | 0.7236  | 1.117  |
| 161377_at   | 17.5   | 18     | 7.3    | 12     | 10.5   | 26     | 7.7    | 20.4   | 0.642761262 | 13.7    | 16.15   | 2.45    | 0.848297214 | 0.7633  | 1.118  |
| 161378_r_at | 237.9  | 161.2  | 176.8  | 263.2  | 170.7  | 282.1  | 280.6  | 237.9  | 0.39037319  | 209.775 | 242.825 | 33.05   | 0.863893751 | 0.4097  | 1.159  |
| 161379_at   | 37.9   | 49.1   | 49     | 63.4   | 31.6   | 46.8   | 70.5   | 44.2   | 0.876651213 | 49.85   | 48.275  | 1.575   | 1.032625583 | 0.7803  | -1.059 |
| 161380_f_at | 269.7  | 342.1  | 291.5  | 442.1  | 299.8  | 261    | 228.9  | 297.3  | 0.196045952 | 336.35  | 271.75  | 64.6    | 1.237718491 | 0.1632  | -1.222 |
| 161381_r_at | 29.3   | 13.6   | 5.4    | 2      | 11.3   | 26.1   | 12.1   | 17.4   | 0.579094496 | 12.575  | 16.725  | 4.15    | 0.75186846  | 0.315   | 1.965  |
| 161382_at   | 42.7   | 56.8   | 31.3   | 45.3   | 33.8   | 42.7   | 44.5   | 9.5    | 0.287152298 | 44.025  | 32.625  | 11.4    | 1.349425287 | 0.304   | -1.542 |
| 161383_r_at | 68.5   | 50.1   | 20.3   | 24.5   | 5.7    | 42.2   | 49.9   | 24.8   | 0.522372656 | 40.85   | 30.65   | 10.2    | 1.33278956  | 0.4734  | -1.547 |



|             |       |       |       |       |        |        |       |        |             |         |          |         |             |          |        |
|-------------|-------|-------|-------|-------|--------|--------|-------|--------|-------------|---------|----------|---------|-------------|----------|--------|
| 161384_r_at | 658.9 | 464.3 | 440.2 | 585.2 | 328.8  | 680.5  | 643   | 689.6  | 0.650921978 | 537.15  | 585.475  | 48.325  | 0.917460182 | 0.7862   | 1.059  |
| 161385_r_at | 23.2  | 15.6  | 9.7   | 16.5  | 10.1   | 27.3   | 9.6   | 12.8   | 0.805146016 | 16.25   | 14.95    | 1.3     | 1.086956522 | 0.6658   | -1.146 |
| 161386_f_at | 240.5 | 204.2 | 190   | 189.3 | 192.9  | 327.1  | 190.4 | 193.2  | 0.6099054   | 206     | 225.9    | 19.9    | 0.911907924 | 0.6524   | 1.071  |
| 161387_i_at | 40.5  | 18.1  | 11.1  | 39.9  | 30.8   | 46.3   | 50.2  | 50.7   | 0.111334389 | 27.4    | 44.5     | 17.1    | 0.615730337 | 0.1249   | 1.829  |
| 161388_f_at | 36    | 44    | 39.4  | 51.2  | 38.3   | 43.9   | 38.3  | 41.8   | 0.591685218 | 42.65   | 40.575   | 2.075   | 1.051139864 | 0.6215   | -1.044 |
| 161389_f_at | 152.8 | 137.8 | 180.1 | 175.5 | 176.2  | 209.8  | 178.3 | 214    | 0.057881581 | 161.55  | 194.575  | 33.025  | 0.830271104 | 0.06008  | 1.206  |
| 161390_r_at | 53.8  | 56.1  | 35.5  | 58.6  | 40.6   | 72.5   | 47    | 28.5   | 0.733640211 | 51      | 47.15    | 3.85    | 1.081654295 | 0.6247   | -1.123 |
| 161391_r_at | 18.7  | 18    | 14    | 8.4   | 13.6   | 25.3   | 12.1  | 15.8   | 0.630721346 | 14.775  | 16.7     | 1.925   | 0.884730539 | 0.6205   | 1.137  |
| 161392_f_at | 285.8 | 232.7 | 217.1 | 225.5 | 245.1  | 378.7  | 261.3 | 264    | 0.237613995 | 240.275 | 287.275  | 47      | 0.836393699 | 0.196    | 1.184  |
| 161393_at   | 1.5   | 3.7   | 1.5   | 2.9   | 2.9    | 3.6    | 1.6   | 3.3    | 0.545413403 | 2.4     | 2.85     | 0.45    | 0.842105263 | 0.5031   | 1.232  |
| 161394_f_at | 5.4   | 4.4   | 4.6   | 5.4   | 17.5   | 33.3   | 12.5  | 30.1   | 0.034040691 | 4.95    | 23.35    | 18.4    | 0.211991435 | 0.000794 | 4.393  |
| 161395_i_at | 30    | 24.2  | 11.9  | 10.1  | 20.4   | 43.5   | 21.3  | 10.8   | 0.580903015 | 19.05   | 24       | 4.95    | 0.79375     | 0.6022   | 1.238  |
| 161396_f_at | 218.5 | 394.1 | 309.1 | 366   | 402    | 255.2  | 268.9 | 349.6  | 0.955869782 | 321.925 | 318.925  | 3       | 1.0094066   | 0.9885   | 1.003  |
| 161397_r_at | 798.5 | 631.3 | 608.1 | 662.4 | 510.5  | 788.3  | 621.1 | 657.9  | 0.684103041 | 675.075 | 644.45   | 30.625  | 1.047521142 | 0.6423   | -1.054 |
| 161398_at   | 16.6  | 14.8  | 44.6  | 15    | 12.8   | 42.6   | 16.6  | 28.5   | 0.818728266 | 22.75   | 25.125   | 2.375   | 0.905472637 | 0.779    | 1.118  |
| 161399_r_at | 19    | 60.2  | 8.3   | 61.2  | 24.6   | 78.5   | 31.2  | 85.5   | 0.428364821 | 37.175  | 54.95    | 17.775  | 0.676524113 | 0.3842   | 1.722  |
| 161400_f_at | 780.2 | 772.4 | 739.3 | 893.5 | 1216.9 | 773.5  | 992.8 | 1078.7 | 0.094971598 | 796.35  | 1015.475 | 219.125 | 0.784214284 | 0.06739  | 1.261  |
| 161401_f_at | 142.2 | 145   | 150.6 | 182.3 | 100.2  | 99.9   | 149.4 | 162.5  | 0.213026014 | 155.025 | 128      | 27.025  | 1.211132813 | 0.1844   | -1.236 |
| 161402_r_at | 44.6  | 18.1  | 14.6  | 19.7  | 11     | 46.5   | 15.5  | 27.3   | 0.939900178 | 24.25   | 25.075   | 0.825   | 0.967098704 | 0.964    | -1.019 |
| 161403_r_at | 57.7  | 37.7  | 22.3  | 44.7  | 31.9   | 45.4   | 38.1  | 13.8   | 0.438573433 | 40.6    | 32.3     | 8.3     | 1.256965944 | 0.4592   | -1.3   |
| 161404_at   | 185.6 | 72.7  | 83    | 111.4 | 148.6  | 152.3  | 51    | 125.2  | 0.866254402 | 113.175 | 119.275  | 6.1     | 0.948857682 | 0.9158   | 1.037  |
| 161405_r_at | 50.3  | 33.8  | 46.3  | 38.8  | 25.2   | 54.2   | 40.2  | 53.2   | 0.912273491 | 42.3    | 43.2     | 0.9     | 0.979166667 | 0.958    | 1.011  |
| 161406_at   | 96    | 72.3  | 52.4  | 84.9  | 50.7   | 107.2  | 72.1  | 68.2   | 0.906600981 | 76.4    | 74.55    | 1.85    | 1.02481556  | 0.863    | -1.037 |
| 161407_i_at | 952.3 | 701.4 | 733   | 659.8 | 589.1  | 1149.4 | 638.4 | 609.1  | 0.924012015 | 761.625 | 746.5    | 15.125  | 1.020261219 | 0.7833   | -1.053 |
| 161408_r_at | 36.7  | 18.2  | 19    | 32.3  | 18.5   | 62     | 22.9  | 27.3   | 0.605101312 | 26.55   | 32.675   | 6.125   | 0.812547819 | 0.6756   | 1.151  |
| 161409_f_at | 98.3  | 119.1 | 163.3 | 171.4 | 193.5  | 124.1  | 153.3 | 49.5   | 0.830644232 | 138.025 | 130.1    | 7.925   | 1.060914681 | 0.6686   | -1.158 |
| 161410_r_at | 27.2  | 23.8  | 19.5  | 21.2  | 28.6   | 43.7   | 22.2  | 23.7   | 0.276117101 | 22.925  | 29.55    | 6.625   | 0.775803723 | 0.2335   | 1.25   |
| 161411_i_at | 43.8  | 21    | 37    | 32.6  | 22     | 76.7   | 17.8  | 23     | 0.935746252 | 33.6    | 34.875   | 1.275   | 0.96344086  | 0.7545   | -1.127 |
| 161412_r_at | 26    | 3.2   | 10    | 5.7   | 2.8    | 32     | 1.1   | 2.6    | 0.866292381 | 11.225  | 9.625    | 1.6     | 1.166233766 | 0.4291   | -2.057 |
| 161413_f_at | 67    | 45    | 56.1  | 54    | 40.6   | 95.7   | 69.2  | 11.7   | 0.951390133 | 55.525  | 54.3     | 1.225   | 1.022559853 | 0.5893   | -1.307 |
| 161414_f_at | 311.5 | 307.2 | 269.4 | 308.8 | 277.7  | 317.7  | 243.1 | 247.6  | 0.224561861 | 299.225 | 271.525  | 27.7    | 1.102016389 | 0.2028   | -1.106 |
| 161415_r_at | 50.4  | 4.1   | 13    | 16.8  | 30     | 36.3   | 22.7  | 3.8    | 0.869560398 | 21.075  | 23.2     | 2.125   | 0.908405172 | 0.8079   | 1.204  |
| 161416_r_at | 17.3  | 1.9   | 0.4   | 1.6   | 4.9    | 11.8   | 14.9  | 0.8    | 0.606312296 | 5.3     | 8.1      | 2.8     | 0.654320988 | 0.4447   | 2.294  |
| 161417_r_at | 11.3  | 0.9   | 8.2   | 9.2   | 6.1    | 2.2    | 5.3   | 16.8   | 0.960956211 | 7.4     | 7.6      | 0.2     | 0.973684211 | 0.8913   | 1.108  |
| 161418_r_at | 45.3  | 17.1  | 18.7  | 31.5  | 29.2   | 86.5   | 39.9  | 40.3   | 0.213113328 | 28.15   | 48.975   | 20.825  | 0.574783053 | 0.1439   | 1.728  |
| 161419_r_at | 52.6  | 92.9  | 98.2  | 67.2  | 122.8  | 66.6   | 112.9 | 38.1   | 0.758581831 | 77.725  | 85.1     | 7.375   | 0.91333725  | 0.945    | 1.022  |
| 161420_r_at | 2.8   | 1.1   | 0.4   | 0.2   | 0.5    | 6      | 1.2   | 0.8    | 0.520578181 | 1.125   | 2.125    | 1       | 0.529411765 | 0.4618   | 1.821  |
| 161421_r_at | 69.2  | 19    | 24.7  | 24.6  | 18.7   | 66.1   | 4.5   | 25.7   | 0.760712647 | 34.375  | 28.75    | 5.625   | 1.195652174 | 0.5166   | -1.541 |
| 161422_f_at | 46.7  | 29    | 29.4  | 35.8  | 37.7   | 73.8   | 43.2  | 35.8   | 0.269929953 | 35.225  | 47.625   | 12.4    | 0.739632546 | 0.2171   | 1.317  |
| 161423_r_at | 50    | 20.5  | 31.7  | 25.8  | 17     | 64.9   | 42.7  | 13.4   | 0.862567994 | 32      | 34.5     | 2.5     | 0.927536232 | 0.87     | -1.074 |
| 161424_f_at | 195.5 | 265.6 | 204.8 | 246.7 | 222.7  | 228.5  | 220.5 | 244.6  | 0.960829584 | 228.15  | 229.075  | 0.925   | 0.995962021 | 0.8881   | 1.011  |
| 161425_r_at | 257.7 | 112.3 | 112.5 | 122.5 | 67.4   | 109.3  | 75.6  | 181.8  | 0.373135776 | 151.25  | 108.525  | 42.725  | 1.39368809  | 0.2984   | -1.408 |
| 161426_at   | 194.7 | 156.9 | 150.6 | 214.7 | 152.6  | 344.4  | 237.1 | 174.8  | 0.355609903 | 179.225 | 227.225  | 48      | 0.788755639 | 0.3606   | 1.218  |
| 161427_f_at | 216.5 | 177.5 | 224.4 | 304.1 | 167.8  | 232.1  | 216.8 | 201.2  | 0.426020503 | 230.625 | 204.475  | 26.15   | 1.127888495 | 0.44     | -1.115 |
| 161428_at   | 302   | 271.4 | 246.3 | 233.1 | 194.4  | 334.6  | 269.9 | 230.9  | 0.871656148 | 263.2   | 257.45   | 5.75    | 1.022334434 | 0.7818   | -1.038 |
| 161429_at   | 179.6 | 45.7  | 74    | 70.8  | 92.2   | 59.8   | 174.4 | 168.6  | 0.476057481 | 92.525  | 123.75   | 31.225  | 0.747676768 | 0.423    | 1.393  |
| 161430_at   | 74.4  | 25.6  | 30.2  | 40.1  | 41.3   | 116.3  | 44.1  | 52     | 0.364482288 | 42.575  | 63.425   | 20.85   | 0.671265274 | 0.2883   | 1.477  |
| 161431_i_at | 4.6   | 4     | 4.8   | 8.3   | 4.7    | 10.4   | 7.6   | 4.6    | 0.442184744 | 5.425   | 6.825    | 1.4     | 0.794871795 | 0.424    | 1.242  |
| 161432_f_at | 371.7 | 325.9 | 232.7 | 182.6 | 146.4  | 398.7  | 228.6 | 157.7  | 0.55573791  | 278.225 | 232.85   | 45.375  | 1.194867941 | 0.4545   | -1.251 |
| 161433_f_at | 160.1 | 160.2 | 174.4 | 165.2 | 208.5  | 182.3  | 165.4 | 189.4  | 0.090808535 | 164.975 | 186.4    | 21.425  | 0.885059013 | 0.06167  | 1.127  |
| 161434_r_at | 57.5  | 26    | 28.5  | 15.3  | 82.1   | 32.8   | 18    | 14.1   | 0.796431244 | 31.825  | 36.75    | 4.925   | 0.865986395 | 0.9816   | 1.012  |
| 161435_i_at | 51    | 29.9  | 15.8  | 23.4  | 23.8   | 43     | 41.3  | 40.1   | 0.460830393 | 30.025  | 37.05    | 7.025   | 0.810391363 | 0.3674   | 1.317  |
| 161436_s_at | 67.5  | 54    | 78.5  | 93.8  | 70.6   | 68.2   | 84.2  | 57.1   | 0.747888502 | 73.45   | 70.025   | 3.425   | 1.048911103 | 0.8013   | -1.038 |
| 161437_f_at | 147.6 | 136.2 | 97.3  | 108.4 | 107.2  | 158.8  | 101.6 | 120.9  | 0.989019815 | 122.375 | 122.125  | 0.25    | 1.002047083 | 0.9816   | 1.003  |
| 161438_r_at | 23.4  | 12.5  | 11.7  | 16.1  | 9.4    | 24     | 8.2   | 11     | 0.564771487 | 15.925  | 13.15    | 2.775   | 1.211026616 | 0.4204   | -1.281 |
| 161439_f_at | 388.7 | 370   | 280.8 | 333.2 | 349.3  | 362.1  | 393.5 | 435.7  | 0.221034839 | 343.175 | 385.15   | 41.975  | 0.891016487 | 0.2199   | 1.127  |



|             |        |        |        |        |        |        |        |        |             |          |          |         |             |         |        |
|-------------|--------|--------|--------|--------|--------|--------|--------|--------|-------------|----------|----------|---------|-------------|---------|--------|
| 161440_r_at | 6.7    | 5.1    | 6.6    | 3      | 4.9    | 22.4   | 13     | 20.9   | 0.087612973 | 5.35     | 15.3     | 9.95    | 0.349673203 | 0.0529  | 2.595  |
| 161441_f_at | 297.3  | 264.2  | 219.8  | 194.6  | 312.8  | 280.7  | 158.7  | 222.8  | 0.995813976 | 243.975  | 243.75   | 0.225   | 1.000923077 | 0.9148  | 1.02   |
| 161442_at   | 5.4    | 5.5    | 3.1    | 2.4    | 3.6    | 6.6    | 2.3    | 7.1    | 0.592627668 | 4.1      | 4.9      | 0.8     | 0.836734694 | 0.6883  | 1.153  |
| 161443_r_at | 5.6    | 1.7    | 0.5    | 0.5    | 1.6    | 3      | 1.2    | 11.4   | 0.449635137 | 2.075    | 4.3      | 2.225   | 0.48255814  | 0.3158  | 2.372  |
| 161444_f_at | 287.2  | 262.1  | 301.2  | 383.3  | 236.8  | 243    | 261.9  | 311.8  | 0.207281785 | 308.45   | 263.375  | 45.075  | 1.171143806 | 0.1832  | -1.166 |
| 161445_at   | 25.1   | 40.2   | 17.2   | 23.5   | 14.4   | 22.6   | 23.9   | 9.7    | 0.192315761 | 26.5     | 17.65    | 8.85    | 1.501416431 | 0.1759  | -1.524 |
| 161446_r_at | 1578.6 | 1057.5 | 1041.4 | 1230.6 | 1178.3 | 2083.2 | 1163.9 | 1195   | 0.523237331 | 1227.025 | 1405.1   | 178.075 | 0.873265248 | 0.5223  | 1.124  |
| 161447_f_at | 55.3   | 51.6   | 31.8   | 57.1   | 33.7   | 47.1   | 53.9   | 12.2   | 0.311561655 | 48.95    | 36.725   | 12.225  | 1.33287951  | 0.3109  | -1.495 |
| 161448_f_at | 3.2    | 7.6    | 3.1    | 2.7    | 4.6    | 3.3    | 3.1    | 4      | 0.758683391 | 4.15     | 3.75     | 0.4     | 1.106666667 | 0.9783  | 1.007  |
| 161449_f_at | 12     | 37.9   | 26.1   | 29.8   | 42.8   | 34.3   | 22     | 30     | 0.43449344  | 26.45    | 32.275   | 5.825   | 0.819519752 | 0.4094  | 1.287  |
| 161450_r_at | 35.2   | 13.5   | 10.8   | 9      | 1      | 15.3   | 3.6    | 1.9    | 0.158057524 | 17.125   | 5.45     | 11.675  | 3.142201835 | 0.06015 | -4.636 |
| 161451_r_at | 36.5   | 56.2   | 16.9   | 48     | 24.9   | 77.8   | 65.2   | 49.6   | 0.336095671 | 39.4     | 54.375   | 14.975  | 0.724597701 | 0.4011  | 1.392  |
| 161452_f_at | 34     | 15     | 18.2   | 34.4   | 12.7   | 40.7   | 30     | 20.6   | 0.942153414 | 25.4     | 26       | 0.6     | 0.976923077 | 0.9971  | 1.001  |
| 161453_r_at | 0.6    | 2.2    | 7.2    | 18.3   | 13.3   | 20.7   | 18.3   | 6.4    | 0.188966585 | 7.075    | 14.675   | 7.6     | 0.482112436 | 0.1458  | 3.686  |
| 161454_r_at | 432.8  | 241.2  | 294.9  | 345.4  | 168.8  | 354.2  | 192    | 250    | 0.18314553  | 328.575  | 241.25   | 87.325  | 1.361968912 | 0.1616  | -1.387 |
| 161455_r_at | 1269.9 | 1231.8 | 1002.8 | 994.8  | 950.8  | 1486.4 | 943.6  | 825.5  | 0.677917303 | 1124.825 | 1051.575 | 73.25   | 1.069657419 | 0.5665  | -1.091 |
| 161456_f_at | 93.2   | 66.1   | 56.8   | 81.5   | 70.8   | 128.9  | 105.8  | 82.7   | 0.195579548 | 74.4     | 97.05    | 22.65   | 0.766615147 | 0.1855  | 1.293  |
| 161457_at   | 51     | 37.9   | 37.6   | 41.5   | 52.4   | 122.4  | 46.1   | 65.4   | 0.187610541 | 42       | 71.575   | 29.575  | 0.586797066 | 0.08778 | 1.591  |
| 161458_at   | 717.8  | 634    | 592    | 671.2  | 619.2  | 788.2  | 712.2  | 719.1  | 0.25204683  | 653.75   | 709.675  | 55.925  | 0.921196322 | 0.2561  | 1.084  |
| 161459_f_at | 1.9    | 2.7    | 2.5    | 1.1    | 2.1    | 15.7   | 2.2    | 1.7    | 0.398138842 | 2.05     | 5.425    | 3.375   | 0.377880184 | 0.3824  | 1.69   |
| 161460_r_at | 22.8   | 21.5   | 18.8   | 21.8   | 13.8   | 20.3   | 17.4   | 9.2    | 0.080301443 | 21.225   | 15.175   | 6.05    | 1.398682043 | 0.07954 | -1.451 |
| 161461_at   | 10.9   | 2.6    | 9.2    | 2.8    | 6.9    | 15.1   | 11     | 3.9    | 0.415051538 | 6.375    | 9.225    | 2.85    | 0.691056911 | 0.383   | 1.572  |
| 161462_r_at | 51.7   | 37.5   | 22.3   | 25.8   | 25     | 77.6   | 38.4   | 35.2   | 0.499344852 | 34.325   | 44.05    | 9.725   | 0.77922815  | 0.5092  | 1.238  |
| 161463_f_at | 24.9   | 7.2    | 2      | 2.7    | 19.9   | 6.5    | 11.6   | 5.1    | 0.812995691 | 9.2      | 10.775   | 1.575   | 0.853828306 | 0.4557  | 1.674  |
| 161464_f_at | 231    | 132    | 199.7  | 258.4  | 134.3  | 166.1  | 241.8  | 219    | 0.696846835 | 205.275  | 190.3    | 14.975  | 1.07869154  | 0.7301  | -1.074 |
| 161465_r_at | 693.6  | 366.1  | 779.3  | 774    | 492.8  | 622.1  | 831.7  | 613    | 0.915693352 | 653.25   | 639.9    | 13.35   | 1.020862635 | 0.9815  | 1.005  |
| 161466_r_at | 135.7  | 152.9  | 165.4  | 130.5  | 171.5  | 174.1  | 171.1  | 154.3  | 0.068422894 | 146.125  | 167.75   | 21.625  | 0.871087928 | 0.06    | 1.152  |
| 161467_f_at | 142.1  | 131.5  | 123.1  | 127.7  | 113.2  | 190.4  | 188.7  | 165.9  | 0.159071329 | 131.1    | 164.55   | 33.45   | 0.796718323 | 0.1496  | 1.231  |
| 161468_f_at | 54.3   | 85.7   | 31.3   | 48.5   | 36.6   | 64.4   | 103.7  | 46     | 0.694656702 | 54.95    | 62.675   | 7.725   | 0.876745114 | 0.7166  | 1.124  |
| 161469_r_at | 497.8  | 419    | 448.5  | 519.5  | 366.1  | 621.4  | 461.7  | 492.2  | 0.817338348 | 471.2    | 485.35   | 14.15   | 0.970845781 | 0.9014  | 1.016  |
| 161470_r_at | 7.1    | 3.9    | 0.7    | 1.8    | 1.6    | 2.7    | 1.1    | 1.9    | 0.355413481 | 3.375    | 1.825    | 1.55    | 1.849315068 | 0.5245  | -1.432 |
| 161471_f_at | 32.5   | 30     | 12.5   | 36.2   | 18.6   | 37.9   | 25.5   | 31.6   | 0.931578002 | 27.8     | 28.4     | 0.6     | 0.978873239 | 0.8315  | 1.066  |
| 161472_r_at | 131.4  | 119    | 71.1   | 101.5  | 94     | 175.7  | 99     | 97     | 0.670772009 | 105.75   | 116.425  | 10.675  | 0.908310071 | 0.6865  | 1.089  |
| 161473_f_at | 1.8    | 2      | 0.4    | 15.9   | 10.6   | 3.5    | 2.2    | 9.4    | 0.753096825 | 5.025    | 6.425    | 1.4     | 0.782101167 | 0.3456  | 2.364  |
| 161474_r_at | 431    | 307.9  | 316.3  | 364.4  | 261.6  | 448.7  | 312.3  | 268.2  | 0.561077362 | 354.9    | 322.7    | 32.2    | 1.09978308  | 0.4792  | -1.117 |
| 161475_f_at | 48.9   | 2.8    | 5.1    | 4.4    | 25     | 38.3   | 5.9    | 17.4   | 0.648836492 | 15.3     | 21.65    | 6.35    | 0.70669746  | 0.2964  | 2.369  |
| 161476_at   | 352.7  | 245.4  | 274.9  | 401.3  | 301.7  | 462.9  | 424.1  | 329.4  | 0.28798096  | 318.575  | 379.525  | 60.95   | 0.839404519 | 0.2834  | 1.196  |
| 161477_r_at | 9      | 2.8    | 3.5    | 3.8    | 3.3    | 15     | 7      | 5.1    | 0.384627433 | 4.775    | 7.6      | 2.825   | 0.628289474 | 0.348   | 1.522  |
| 161478_at   | 6.9    | 5.9    | 5.9    | 4.4    | 5.4    | 13.7   | 17.3   | 9.5    | 0.111904081 | 5.775    | 11.475   | 5.7     | 0.503267974 | 0.06571 | 1.844  |
| 161479_f_at | 36.2   | 35.9   | 15.5   | 50     | 42.9   | 75.1   | 52.2   | 19     | 0.387009785 | 34.4     | 47.3     | 12.9    | 0.727272727 | 0.4817  | 1.333  |
| 161480_i_at | 6980.3 | 9630.5 | 5557   | 5000.1 | 8783.4 | 6671.1 | 5863.7 | 5915.4 | 0.989921011 | 6791.975 | 6808.4   | 16.425  | 0.997587539 | 0.9069  | 1.021  |
| 161481_f_at | 5.4    | 21.3   | 3      | 5.6    | 4.3    | 5      | 2.4    | 17     | 0.768910335 | 8.825    | 7.175    | 1.65    | 1.229965157 | 0.7409  | -1.224 |
| 161482_f_at | 9.8    | 48.5   | 24.2   | 53.6   | 10.1   | 55     | 44.4   | 68.4   | 0.543039006 | 34.025   | 44.475   | 10.45   | 0.765036537 | 0.6824  | 1.285  |
| 161483_r_at | 21.6   | 2.9    | 4.5    | 4      | 1.6    | 30.5   | 5.7    | 1.4    | 0.858664689 | 8.25     | 9.8      | 1.55    | 0.841836735 | 0.7629  | -1.305 |
| 161484_r_at | 3.6    | 2.7    | 1.8    | 5.6    | 2.4    | 3.3    | 2.2    | 1.7    | 0.308476942 | 3.425    | 2.4      | 1.025   | 1.427083333 | 0.3236  | -1.352 |
| 161485_r_at | 59     | 45.9   | 26.4   | 27.7   | 20.1   | 59.6   | 42.5   | 37.5   | 0.988116405 | 39.75    | 39.925   | 0.175   | 0.995616781 | 0.977   | 1.009  |
| 161486_f_at | 45.8   | 8.6    | 31.1   | 24.7   | 18.7   | 60.1   | 9.5    | 27.9   | 0.915187879 | 27.55    | 29.05    | 1.5     | 0.948364888 | 0.9952  | 1.003  |
| 161487_f_at | 505.6  | 484.8  | 545    | 503.5  | 692.6  | 705.4  | 543.1  | 565.1  | 0.064485621 | 509.725  | 626.55   | 116.825 | 0.813542415 | 0.03185 | 1.222  |
| 161488_r_at | 9.6    | 19     | 7.5    | 30.6   | 20.6   | 11.5   | 11.3   | 13.7   | 0.695586115 | 16.675   | 14.275   | 2.4     | 1.168126095 | 0.9208  | 1.037  |
| 161489_r_at | 50.2   | 31.4   | 21.7   | 5.6    | 29     | 33.4   | 23     | 25.7   | 0.957523824 | 27.225   | 27.775   | 0.55    | 0.98019802  | 0.5874  | 1.316  |
| 161490_at   | 16     | 8.5    | 2.6    | 2.3    | 10.9   | 21.6   | 14.1   | 7.9    | 0.200623662 | 7.35     | 13.625   | 6.275   | 0.539449541 | 0.1434  | 2.37   |
| 161491_r_at | 95.8   | 59.1   | 31     | 58.5   | 44.3   | 77     | 33.6   | 42.9   | 0.505130926 | 61.1     | 49.45    | 11.65   | 1.235591507 | 0.5491  | -1.202 |
| 161492_i_at | 700.6  | 590.8  | 566.5  | 662    | 538.4  | 721.2  | 588.6  | 475    | 0.456113578 | 629.975  | 580.8    | 49.175  | 1.0846677   | 0.409   | -1.093 |
| 161493_at   | 68.5   | 44.1   | 38     | 31.8   | 31.5   | 130    | 38.2   | 39.3   | 0.601440059 | 45.6     | 59.75    | 14.15   | 0.763179916 | 0.7316  | 1.139  |
| 161494_f_at | 321    | 383.9  | 314.4  | 353    | 376.9  | 324.3  | 278.9  | 300.2  | 0.4207081   | 343.075  | 320.075  | 23      | 1.071858158 | 0.3955  | -1.075 |
| 161495_r_at | 113.5  | 39     | 61.7   | 68.1   | 46     | 106.4  | 46     | 63     | 0.813107101 | 70.575   | 65.35    | 5.225   | 1.079954093 | 0.828   | -1.069 |



|             |        |        |       |        |        |        |        |        |             |         |         |        |             |         |        |
|-------------|--------|--------|-------|--------|--------|--------|--------|--------|-------------|---------|---------|--------|-------------|---------|--------|
| 161496_r_at | 145.8  | 156.1  | 143.6 | 200.6  | 121    | 213.6  | 122.8  | 122.4  | 0.559701738 | 161.525 | 144.95  | 16.575 | 1.114349776 | 0.4453  | -1.14  |
| 161497_f_at | 85.4   | 134.6  | 106.9 | 150.8  | 99.6   | 84.3   | 110    | 145.9  | 0.645291142 | 119.425 | 109.95  | 9.475  | 1.086175534 | 0.6574  | -1.083 |
| 161498_at   | 1273.1 | 1575.7 | 979.3 | 1137.7 | 1244.2 | 1116.1 | 1234.6 | 1263.9 | 0.84965846  | 1241.45 | 1214.7  | 26.75  | 1.022021898 | 0.943   | 1.008  |
| 161499_f_at | 209.3  | 280.4  | 355.4 | 282.3  | 261.8  | 344.2  | 239.3  | 303.5  | 0.892301758 | 281.85  | 287.2   | 5.35   | 0.981371866 | 0.8509  | 1.027  |
| 161500_i_at | 268    | 136.8  | 144   | 227.8  | 133.1  | 327.9  | 183    | 159.6  | 0.905152057 | 194.15  | 200.9   | 6.75   | 0.966401195 | 0.9563  | 1.015  |
| 161501_at   | 13.9   | 12.1   | 7.2   | 20     | 17.9   | 54.2   | 8.6    | 9.4    | 0.460344299 | 13.3    | 22.525  | 9.225  | 0.59045505  | 0.5586  | 1.341  |
| 161502_r_at | 128.4  | 58.2   | 87.6  | 104.7  | 78.4   | 180.8  | 85.3   | 100.5  | 0.578920172 | 94.725  | 111.25  | 16.525 | 0.851460674 | 0.5914  | 1.154  |
| 161503_f_at | 62     | 34.6   | 49.2  | 50.6   | 24.6   | 35.7   | 42.1   | 53.9   | 0.273416988 | 49.1    | 39.075  | 10.025 | 1.256557901 | 0.2734  | -1.279 |
| 161504_i_at | 140.6  | 80.6   | 99.9  | 130.2  | 90.6   | 173.1  | 123.9  | 106.5  | 0.653187813 | 112.825 | 123.525 | 10.7   | 0.913377859 | 0.6658  | 1.089  |
| 161505_i_at | 29     | 28.3   | 15.7  | 14.8   | 8.3    | 18.8   | 9      | 9.5    | 0.069296194 | 21.95   | 11.4    | 10.55  | 1.925438596 | 0.04399 | -1.949 |
| 161506_r_at | 227.3  | 131.3  | 248   | 197    | 168.6  | 238.2  | 217.7  | 169.7  | 0.942120826 | 200.9   | 198.55  | 2.35   | 1.01183581  | 0.9806  | 1.004  |
| 161507_f_at | 45.9   | 51.2   | 41.3  | 59     | 65.4   | 84.4   | 74.1   | 47     | 0.099736722 | 49.35   | 67.725  | 18.375 | 0.728682171 | 0.08545 | 1.353  |
| 161508_at   | 11.6   | 12.8   | 9.6   | 8.3    | 4.6    | 7.5    | 7.8    | 22.6   | 0.991128322 | 10.575  | 10.625  | 0.05   | 0.995294118 | 0.66    | -1.175 |
| 161509_at   | 53.2   | 63.1   | 59    | 64     | 66.4   | 47.5   | 51.1   | 68.5   | 0.815838188 | 59.825  | 58.375  | 1.45   | 1.0248394   | 0.7451  | -1.035 |
| 161510_f_at | 910.4  | 719.4  | 760   | 894.3  | 721.3  | 1050.5 | 770    | 752.4  | 0.978705991 | 821.025 | 823.55  | 2.525  | 0.996934005 | 0.974   | 1.004  |
| 161511_f_at | 25.3   | 35.9   | 23.5  | 14.9   | 34.2   | 38.4   | 13.8   | 26.4   | 0.650881514 | 24.9    | 28.2    | 3.3    | 0.882978723 | 0.737   | 1.108  |
| 161512_r_at | 202.4  | 165.4  | 241.5 | 248.5  | 200.4  | 323.4  | 160.8  | 263.7  | 0.603212163 | 214.45  | 237.075 | 22.625 | 0.904566066 | 0.6786  | 1.081  |
| 161513_r_at | 47.7   | 19.5   | 32.7  | 34.8   | 20     | 27.4   | 43.3   | 37.8   | 0.848722294 | 33.675  | 32.125  | 1.55   | 1.048249027 | 0.8761  | -1.042 |
| 161514_at   | 302.7  | 386.8  | 335.8 | 299.6  | 773.6  | 491.6  | 341.1  | 360.8  | 0.205777732 | 331.225 | 491.775 | 160.55 | 0.673529561 | 0.1303  | 1.412  |
| 161515_i_at | 10.1   | 6.9    | 11.5  | 12     | 24.4   | 25.8   | 32.4   | 8.8    | 0.081091625 | 10.125  | 22.85   | 12.725 | 0.443107221 | 0.05931 | 2.085  |
| 161516_r_at | 16.6   | 21.7   | 17.4  | 24.9   | 20.9   | 35.2   | 20.8   | 25.1   | 0.231152935 | 20.15   | 25.5    | 5.35   | 0.790196078 | 0.1962  | 1.255  |
| 161517_at   | 27.7   | 7.1    | 17.1  | 17.9   | 16.5   | 44.6   | 19.5   | 23.9   | 0.30408348  | 17.45   | 26.125  | 8.675  | 0.667942584 | 0.2711  | 1.546  |
| 161518_r_at | 28.3   | 24     | 16.7  | 16.3   | 20.1   | 38     | 4      | 21.2   | 0.950250303 | 21.325  | 20.825  | 0.5    | 1.024009604 | 0.6216  | -1.298 |
| 161519_f_at | 410.8  | 265    | 266.9 | 270.7  | 367    | 379.5  | 289.2  | 382.6  | 0.277899768 | 303.35  | 354.575 | 51.225 | 0.85553127  | 0.2314  | 1.183  |
| 161520_at   | 3      | 2.9    | 4.3   | 1      | 1.5    | 16.4   | 2.2    | 5.1    | 0.38878814  | 2.8     | 6.3     | 3.5    | 0.444444444 | 0.4474  | 1.639  |
| 161521_at   | 2.7    | 7.5    | 7.4   | 3.4    | 5.9    | 2.9    | 6.1    | 8.5    | 0.738907344 | 5.25    | 5.85    | 0.6    | 0.897435897 | 0.7122  | 1.144  |
| 161522_i_at | 329.5  | 557.1  | 285.4 | 379.6  | 428.3  | 368    | 415.7  | 215.9  | 0.702451203 | 387.9   | 356.975 | 30.925 | 1.086630716 | 0.7053  | -1.089 |
| 161523_r_at | 42.9   | 23.9   | 20.6  | 26     | 16.3   | 39.8   | 16.1   | 23.8   | 0.581490568 | 28.35   | 24      | 4.35   | 1.18125     | 0.4835  | -1.219 |
| 161524_r_at | 121.5  | 79.8   | 80.4  | 74.6   | 79.2   | 173.2  | 88.3   | 77.9   | 0.571062771 | 89.075  | 104.65  | 15.575 | 0.851170569 | 0.6018  | 1.129  |
| 161525_f_at | 1.2    | 13.1   | 10.8  | 16.4   | 8.6    | 11.6   | 15.9   | 20.7   | 0.398717257 | 10.375  | 14.2    | 3.825  | 0.730633803 | 0.3694  | 1.848  |
| 161526_r_at | 34     | 31.6   | 15.2  | 19.3   | 10.3   | 35.2   | 7.8    | 16.7   | 0.369652484 | 25.025  | 17.5    | 7.525  | 1.43        | 0.261   | -1.607 |
| 161527_r_at | 5.9    | 5      | 0.1   | 0.4    | 2.2    | 0.6    | 0.3    | 0.3    | 0.282642972 | 2.85    | 0.85    | 2      | 3.352941176 | 0.6356  | -1.774 |
| 161528_r_at | 89     | 62.5   | 58.6  | 78.1   | 56.9   | 117.7  | 64.7   | 65.4   | 0.803928474 | 72.05   | 76.175  | 4.125  | 0.945848375 | 0.892   | 1.027  |
| 161529_r_at | 79.3   | 51.6   | 36.6  | 56     | 39.2   | 111.7  | 50.1   | 49.1   | 0.739067626 | 55.875  | 62.525  | 6.65   | 0.893642543 | 0.8301  | 1.065  |
| 161530_r_at | 88.4   | 45.5   | 27.3  | 49.6   | 44.3   | 96.8   | 48.4   | 48.1   | 0.721459993 | 52.7    | 59.4    | 6.7    | 0.887205387 | 0.6319  | 1.164  |
| 161531_r_at | 8.7    | 1      | 1.3   | 2.8    | 12.7   | 20.4   | 2.9    | 8.1    | 0.134498299 | 3.45    | 11.025  | 7.575  | 0.31292517  | 0.08654 | 3.653  |
| 161532_f_at | 8.1    | 24.1   | 9     | 23.9   | 21.9   | 9.3    | 4.8    | 19     | 0.689030836 | 16.275  | 13.75   | 2.525  | 1.183636364 | 0.6769  | -1.223 |
| 161533_at   | 36.8   | 12.8   | 29.2  | 26.5   | 31.2   | 60.1   | 27.8   | 16.8   | 0.501658975 | 26.325  | 33.975  | 7.65   | 0.774834437 | 0.5528  | 1.244  |
| 161534_f_at | 38.6   | 72.3   | 55.6  | 105.6  | 97.8   | 83.4   | 103.9  | 98.8   | 0.143630163 | 68.025  | 95.975  | 27.95  | 0.708778328 | 0.1102  | 1.504  |
| 161535_at   | 508.6  | 461.6  | 438.7 | 590.1  | 587.1  | 546    | 558.8  | 450    | 0.455676786 | 499.75  | 535.475 | 35.725 | 0.933283533 | 0.4503  | 1.073  |
| 161536_r_at | 46.1   | 16.3   | 18.3  | 29.1   | 22.5   | 57.6   | 28.7   | 16.3   | 0.749534295 | 27.45   | 31.275  | 3.825  | 0.877697842 | 0.7818  | 1.109  |
| 161537_f_at | 17.5   | 24.3   | 33.3  | 33.3   | 32.4   | 49.5   | 29.4   | 40.5   | 0.117829572 | 27.1    | 37.95   | 10.85  | 0.714097497 | 0.1201  | 1.419  |
| 161538_r_at | 17.9   | 8.2    | 1.4   | 2.1    | 6.8    | 3.8    | 12.7   | 5.9    | 0.982330398 | 7.4     | 7.3     | 0.1    | 1.01369863  | 0.5808  | 1.455  |
| 161539_f_at | 18.9   | 19.7   | 21.5  | 20.4   | 32.7   | 29.1   | 13     | 27.1   | 0.304056085 | 20.125  | 25.475  | 5.35   | 0.789990186 | 0.4278  | 1.197  |
| 161540_r_at | 14.4   | 8.2    | 6     | 3.3    | 4.5    | 7.9    | 0.3    | 8.4    | 0.406765503 | 7.975   | 5.275   | 2.7    | 1.511848341 | 0.3721  | -2.253 |
| 161541_r_at | 32.5   | 33.7   | 9.9   | 22.2   | 27.9   | 36.7   | 27     | 7.9    | 0.972044    | 24.575  | 24.875  | 0.3    | 0.987939698 | 0.9586  | -1.024 |
| 161542_r_at | 321.6  | 406.8  | 125.7 | 198.8  | 279.1  | 548.4  | 157.1  | 430.1  | 0.429448223 | 263.225 | 353.675 | 90.45  | 0.744256733 | 0.4759  | 1.334  |
| 161543_at   | 74.4   | 35.2   | 32.5  | 41.4   | 29.7   | 99.2   | 59.5   | 43.8   | 0.525035988 | 45.875  | 58.05   | 12.175 | 0.790267011 | 0.5619  | 1.214  |
| 161544_r_at | 1.8    | 4.4    | 3.1   | 4.5    | 0.8    | 10.2   | 2.6    | 11.8   | 0.37006604  | 3.45    | 6.35    | 2.9    | 0.543307087 | 0.7817  | 1.215  |
| 161545_r_at | 181.9  | 136.8  | 82.5  | 96     | 116.5  | 184.2  | 56.5   | 81.1   | 0.694695268 | 124.3   | 109.575 | 14.725 | 1.134382843 | 0.5946  | -1.19  |
| 161546_r_at | 140.4  | 51.7   | 49    | 99.4   | 66.3   | 210.9  | 87.7   | 153.3  | 0.308601415 | 85.125  | 129.55  | 44.425 | 0.657082208 | 0.2985  | 1.518  |
| 161547_f_at | 200.8  | 101.7  | 79    | 37.8   | 35.1   | 59.2   | 79.1   | 32.7   | 0.2237391   | 104.825 | 51.525  | 53.3   | 2.034449296 | 0.1845  | -1.835 |
| 161548_r_at | 111.7  | 72.5   | 51.1  | 66.8   | 66.4   | 134.9  | 60.1   | 72     | 0.730710148 | 75.525  | 83.35   | 7.825  | 0.906118776 | 0.7399  | 1.089  |
| 161549_f_at | 76.5   | 26.3   | 46.1  | 88.1   | 83.9   | 97.2   | 47.6   | 76.4   | 0.373083081 | 59.25   | 76.275  | 17.025 | 0.776794494 | 0.3449  | 1.381  |
| 161550_r_at | 20.2   | 4.8    | 6.3   | 12.1   | 1.8    | 3.6    | 6.7    | 11     | 0.265802129 | 10.85   | 5.775   | 5.075  | 1.878787879 | 0.2226  | -1.987 |
| 161551_f_at | 80     | 110.7  | 91.3  | 125.5  | 124.9  | 171.4  | 112.1  | 139.1  | 0.077508626 | 101.875 | 136.875 | 35     | 0.744292237 | 0.06985 | 1.346  |



|             |        |        |        |        |        |        |       |        |             |         |          |        |             |         |        |
|-------------|--------|--------|--------|--------|--------|--------|-------|--------|-------------|---------|----------|--------|-------------|---------|--------|
| 161552_i_at | 1      | 3.2    | 1.1    | 1.8    | 0.5    | 1.2    | 14.8  | 1.3    | 0.497253847 | 1.775   | 4.45     | 2.675  | 0.398876404 | 0.8502  | 1.164  |
| 161553_i_at | 36.8   | 19     | 13.7   | 12.3   | 18.5   | 32.8   | 2.8   | 23.6   | 0.907357471 | 20.45   | 19.425   | 1.025  | 1.052767053 | 0.6752  | -1.303 |
| 161554_r_at | 94     | 21     | 51.8   | 17.2   | 15     | 123.6  | 17    | 17.2   | 0.933874472 | 46      | 43.2     | 2.8    | 1.064814815 | 0.663   | -1.343 |
| 161555_f_at | 4.6    | 9.2    | 6.1    | 18.1   | 5.5    | 29.4   | 7.6   | 11.5   | 0.550687477 | 9.5     | 13.5     | 4      | 0.703703704 | 0.5792  | 1.319  |
| 161556_at   | 10.9   | 9.9    | 8.8    | 31     | 20.8   | 15.9   | 18.4  | 10.1   | 0.851713177 | 15.15   | 16.3     | 1.15   | 0.929447853 | 0.597   | 1.203  |
| 161557_at   | 288.2  | 250    | 249.4  | 256.1  | 255    | 367.7  | 174.5 | 197.7  | 0.798567774 | 260.925 | 248.725  | 12.2   | 1.049050156 | 0.6182  | -1.092 |
| 161558_f_at | 156.7  | 30.1   | 75.9   | 51.3   | 99     | 86.8   | 76.4  | 64.1   | 0.9205751   | 78.5    | 81.575   | 3.075  | 0.962304628 | 0.585   | 1.231  |
| 161559_i_at | 16.4   | 77.1   | 21.6   | 62.8   | 24.1   | 46.4   | 39.6  | 17.7   | 0.487323887 | 44.475  | 31.95    | 12.525 | 1.392018779 | 0.6764  | -1.215 |
| 161560_f_at | 135.8  | 145.2  | 139.5  | 164.7  | 127.1  | 158.7  | 167   | 123    | 0.86187405  | 146.3   | 143.95   | 2.35   | 1.016325113 | 0.8091  | 1.023  |
| 161561_r_at | 861.4  | 811.2  | 849.2  | 859.6  | 644    | 968.4  | 861   | 792.7  | 0.702487182 | 845.35  | 816.525  | 28.825 | 1.035302042 | 0.6219  | -1.046 |
| 161562_f_at | 306.8  | 299.5  | 253.8  | 283.2  | 217.9  | 234.6  | 260.2 | 162.1  | 0.039742462 | 285.825 | 218.7    | 67.125 | 1.306927298 | 0.04391 | -1.323 |
| 161563_r_at | 4512.8 | 2477.4 | 3363.7 | 3486.5 | 2994.2 | 4900.2 | 2988  | 3106.5 | 0.95473098  | 3460.1  | 3497.225 | 37.125 | 0.989384441 | 0.9578  | 1.01   |
| 161564_r_at | 54.2   | 6.5    | 9.5    | 20.8   | 28.5   | 49.6   | 11.5  | 5.4    | 0.948164321 | 22.75   | 23.75    | 1      | 0.957894737 | 0.9324  | 1.062  |
| 161565_r_at | 5.4    | 2      | 5.9    | 3.2    | 2.6    | 8.4    | 26.9  | 27.3   | 0.15017202  | 4.125   | 16.3     | 12.175 | 0.253067485 | 0.1291  | 2.968  |
| 161566_r_at | 15.9   | 25.3   | 13.9   | 29.5   | 6.3    | 24     | 10.9  | 2.3    | 0.140929536 | 21.15   | 10.875   | 10.275 | 1.944827586 | 0.1221  | -2.571 |
| 161567_r_at | 0.9    | 1      | 2.8    | 0.8    | 1      | 1.3    | 2.2   | 2.5    | 0.55394329  | 1.375   | 1.75     | 0.375  | 0.785714286 | 0.3395  | 1.471  |
| 161568_f_at | 47.1   | 51.4   | 26     | 22     | 26.1   | 23.6   | 15.4  | 14.9   | 0.105942091 | 36.625  | 20       | 16.625 | 1.83125     | 0.06773 | -1.769 |
| 161569_f_at | 61.3   | 18.3   | 9.4    | 18.8   | 47.3   | 39     | 14.5  | 37.4   | 0.600894901 | 26.95   | 34.55    | 7.6    | 0.780028944 | 0.422   | 1.502  |
| 161570_r_at | 15.1   | 2.9    | 10.5   | 10.3   | 4.2    | 16.2   | 1.7   | 13.9   | 0.878399154 | 9.7     | 9        | 0.7    | 1.077777778 | 0.6986  | -1.298 |
| 161571_f_at | 50.3   | 41.9   | 15.3   | 13.6   | 18.4   | 57.1   | 36    | 35.9   | 0.610245119 | 30.275  | 36.85    | 6.575  | 0.821573948 | 0.5168  | 1.326  |
| 161572_r_at | 22.2   | 12.4   | 9.7    | 10.8   | 10.7   | 19     | 13.1  | 13.6   | 0.926634329 | 13.775  | 14.1     | 0.325  | 0.976950355 | 0.8151  | 1.055  |
| 161573_at   | 205.3  | 243.1  | 221.4  | 332.8  | 290    | 273.2  | 275.7 | 252.4  | 0.500243465 | 250.65  | 272.825  | 22.175 | 0.918720792 | 0.3929  | 1.107  |
| 161574_r_at | 5.7    | 0.7    | 7.2    | 6.5    | 5.7    | 6.8    | 7.7   | 9.7    | 0.21157784  | 5.025   | 7.475    | 2.45   | 0.672240803 | 0.2742  | 1.978  |
| 161575_f_at | 26.6   | 17.8   | 21.3   | 14.1   | 39.8   | 27.2   | 40.9  | 31.8   | 0.012974116 | 19.95   | 34.925   | 14.975 | 0.571224052 | 0.01337 | 1.774  |
| 161576_f_at | 310.2  | 220.2  | 228    | 217.9  | 255.1  | 327.3  | 230.5 | 264.3  | 0.43646541  | 244.075 | 269.3    | 25.225 | 0.906331229 | 0.401   | 1.106  |
| 161577_f_at | 8      | 3.4    | 2.6    | 2.2    | 3      | 7.6    | 3.4   | 2.7    | 0.945931985 | 4.05    | 4.175    | 0.125  | 0.97005988  | 0.8422  | 1.081  |
| 161578_r_at | 25.1   | 21.9   | 19.7   | 23.8   | 15.3   | 90.2   | 43.2  | 49.4   | 0.179979212 | 22.625  | 49.525   | 26.9   | 0.45683998  | 0.1524  | 1.84   |
| 161579_r_at | 9.2    | 3.4    | 2      | 2.3    | 3      | 11.2   | 4.3   | 19.4   | 0.269751882 | 4.225   | 9.475    | 5.25   | 0.44591029  | 0.2265  | 2.096  |
| 161580_f_at | 50     | 166.6  | 89.7   | 45.6   | 44.5   | 62.9   | 148.2 | 109    | 0.933566957 | 87.975  | 91.15    | 3.175  | 0.965167307 | 0.8666  | 1.073  |
| 161581_r_at | 136.5  | 100.3  | 65.5   | 77.8   | 70.7   | 203.7  | 84.5  | 78.5   | 0.703267664 | 95.025  | 109.35   | 14.325 | 0.868998628 | 0.7968  | 1.082  |
| 161582_r_at | 36.5   | 25.6   | 6.2    | 10     | 10.4   | 14.4   | 18.2  | 9.4    | 0.432801935 | 19.575  | 13.1     | 6.475  | 1.494274809 | 0.6613  | -1.224 |
| 161583_at   | 6.4    | 10.5   | 23.4   | 24.3   | 27.5   | 35.3   | 6.9   | 4.2    | 0.80436642  | 16.15   | 18.475   | 2.325  | 0.874154263 | 0.9     | -1.084 |
| 161584_r_at | 5.6    | 5.1    | 4.1    | 3.7    | 1      | 1.7    | 5     | 2.9    | 0.107402869 | 4.625   | 2.65     | 1.975  | 1.745283019 | 0.08853 | -2.046 |
| 161585_at   | 91.2   | 31.9   | 38.5   | 42.2   | 45.1   | 70.3   | 32.3  | 53.1   | 0.963901536 | 50.95   | 50.2     | 0.75   | 1.014940239 | 0.9043  | 1.036  |
| 161586_f_at | 3.3    | 12.1   | 8.6    | 23.1   | 14.8   | 15.2   | 23.7  | 4.3    | 0.653470893 | 11.775  | 14.5     | 2.725  | 0.812068966 | 0.6419  | 1.307  |
| 161587_at   | 37.7   | 15.9   | 9      | 19.4   | 2.7    | 31.6   | 3.6   | 18.5   | 0.513118514 | 20.5    | 14.1     | 6.4    | 1.453900709 | 0.32    | -2.077 |
| 161588_r_at | 19.8   | 5.4    | 6      | 11.6   | 11     | 16.2   | 13.3  | 7.8    | 0.732449952 | 10.7    | 12.075   | 1.375  | 0.886128364 | 0.5251  | 1.258  |
| 161589_at   | 10.6   | 10.6   | 4.2    | 2.9    | 6.8    | 11.1   | 4.7   | 6.3    | 0.953756009 | 7.075   | 7.225    | 0.15   | 0.979238754 | 0.7601  | 1.128  |
| 161590_r_at | 18.9   | 12.3   | 17.9   | 14.7   | 30.4   | 30.4   | 1.9   | 11.8   | 0.734803265 | 15.95   | 18.625   | 2.675  | 0.856375839 | 0.6966  | -1.309 |
| 161591_r_at | 110.8  | 71.1   | 60.9   | 64.8   | 61.9   | 119    | 83.3  | 73.7   | 0.6687648   | 76.9    | 84.475   | 7.575  | 0.9103285   | 0.647   | 1.098  |
| 161592_at   | 29     | 17.3   | 3.3    | 13.3   | 11.4   | 27.7   | 23.1  | 21.3   | 0.451793037 | 15.725  | 20.875   | 5.15   | 0.753293413 | 0.3693  | 1.632  |
| 161593_r_at | 17.5   | 10.5   | 4.9    | 12.5   | 5.3    | 7      | 14.1  | 7.2    | 0.402087061 | 11.35   | 8.4      | 2.95   | 1.351190476 | 0.4652  | -1.306 |
| 161594_f_at | 130.3  | 109.8  | 96.7   | 86.3   | 93.4   | 161.1  | 119.8 | 117.8  | 0.35306483  | 105.775 | 123.025  | 17.25  | 0.859784597 | 0.3501  | 1.155  |
| 161595_at   | 53.3   | 38.8   | 48.1   | 41.7   | 40.3   | 82.2   | 43.6  | 65.9   | 0.300446486 | 45.475  | 58       | 12.525 | 0.784051724 | 0.302   | 1.231  |
| 161596_f_at | 281.1  | 137.6  | 134.4  | 156.9  | 162.3  | 286.5  | 136.3 | 169.6  | 0.824685784 | 177.5   | 188.675  | 11.175 | 0.940771167 | 0.7796  | 1.071  |
| 161597_r_at | 20.6   | 5.1    | 2.3    | 2.1    | 7.2    | 4.6    | 13.6  | 13.5   | 0.678062896 | 7.525   | 9.725    | 2.2    | 0.77377892  | 0.33    | 1.871  |
| 161598_at   | 16.5   | 23.7   | 50.2   | 28.9   | 32.9   | 33.8   | 14    | 11.6   | 0.49996677  | 29.825  | 23.075   | 6.75   | 1.292524377 | 0.4637  | -1.33  |
| 161599_i_at | 35.2   | 25.9   | 23.7   | 24     | 23.6   | 38.4   | 24.9  | 27.7   | 0.748929265 | 27.2    | 28.65    | 1.45   | 0.94938918  | 0.7509  | 1.049  |
| 161600_r_at | 185.3  | 137.9  | 145    | 107.9  | 135.3  | 163.3  | 117.6 | 104.8  | 0.525052421 | 144.025 | 130.25   | 13.775 | 1.105758157 | 0.5366  | -1.101 |
| 161601_i_at | 43.3   | 25.1   | 25.5   | 25.7   | 68     | 9.8    | 48.8  | 50.9   | 0.334115656 | 29.9    | 44.375   | 14.475 | 0.673802817 | 0.662   | 1.235  |
| 161602_at   | 23.4   | 18     | 5.9    | 2.7    | 5      | 14.7   | 10.7  | 18.4   | 0.96000397  | 12.5    | 12.2     | 0.3    | 1.024590164 | 0.7515  | 1.211  |
| 161603_r_at | 213.1  | 215.2  | 214.8  | 295.1  | 224.7  | 254.8  | 267.1 | 304.1  | 0.323056866 | 234.55  | 262.675  | 28.125 | 0.892928524 | 0.291   | 1.125  |
| 161604_r_at | 5      | 4.3    | 1.1    | 2.5    | 4.6    | 5.9    | 9.9   | 2      | 0.264237586 | 3.225   | 5.6      | 2.375  | 0.575892857 | 0.2965  | 1.717  |
| 161605_f_at | 59.3   | 50.5   | 49.7   | 40.4   | 48.5   | 83.5   | 65.7  | 49.5   | 0.259588752 | 49.975  | 61.8     | 11.825 | 0.808656958 | 0.2425  | 1.217  |
| 161606_f_at | 177.9  | 109.9  | 111.4  | 162.4  | 126.4  | 257.6  | 179   | 130.3  | 0.394174219 | 140.4   | 173.325  | 32.925 | 0.810038944 | 0.3943  | 1.21   |
| 161607_r_at | 13.1   | 1.1    | 4.7    | 0.9    | 2.4    | 18.5   | 11.8  | 8.4    | 0.27366774  | 4.95    | 10.275   | 5.325  | 0.481751825 | 0.2169  | 2.908  |



|             |        |        |        |        |        |        |        |        |              |         |          |         |             |         |        |
|-------------|--------|--------|--------|--------|--------|--------|--------|--------|--------------|---------|----------|---------|-------------|---------|--------|
| 161608_r_at | 9.7    | 9.7    | 7.9    | 10.7   | 8.3    | 7.5    | 8.9    | 1.9    | 0.175443125  | 9.5     | 6.65     | 2.85    | 1.428571429 | 0.2238  | -1.657 |
| 161609_at   | 78.6   | 52.2   | 56.3   | 69.3   | 71.1   | 93.8   | 92.2   | 89.9   | 0.030954724  | 64.1    | 86.75    | 22.65   | 0.738904899 | 0.0349  | 1.363  |
| 161610_at   | 210.2  | 244.7  | 286.7  | 263    | 352.1  | 287    | 295.1  | 256.2  | 0.122914996  | 251.15  | 297.6    | 46.45   | 0.843918011 | 0.1182  | 1.185  |
| 161611_f_at | 123.8  | 195.7  | 117.6  | 135    | 148.1  | 209.7  | 139.6  | 125.3  | 0.641852347  | 143.025 | 155.675  | 12.65   | 0.918740967 | 0.6102  | 1.09   |
| 161612_f_at | 480.1  | 255    | 289.8  | 325.5  | 371.4  | 367.6  | 383.9  | 361.3  | 0.549531688  | 337.6   | 371.05   | 33.45   | 0.909850424 | 0.4024  | 1.132  |
| 161613_at   | 203.5  | 177.8  | 212.6  | 240.7  | 223.3  | 241.9  | 236.5  | 245.6  | 0.115020048  | 208.65  | 236.825  | 28.175  | 0.881030297 | 0.09219 | 1.141  |
| 161614_r_at | 184.3  | 127.9  | 168.8  | 163    | 131.7  | 165    | 146.8  | 211.5  | 0.900690776  | 161     | 163.75   | 2.75    | 0.983206107 | 0.9418  | 1.01   |
| 161615_f_at | 194.9  | 160.8  | 164    | 213.1  | 186.9  | 219.1  | 175.5  | 178.5  | 0.687726182  | 183.2   | 190      | 6.8     | 0.964210526 | 0.6586  | 1.04   |
| 161616_f_at | 46.5   | 52     | 29.5   | 23.8   | 82.2   | 75.2   | 65.4   | 54.8   | 0.013120671  | 37.95   | 69.4     | 31.45   | 0.546829971 | 0.02013 | 1.9    |
| 161617_f_at | 31.7   | 29.5   | 23.7   | 22.9   | 37.2   | 36.4   | 23.9   | 48.3   | 0.153870178  | 26.95   | 36.45    | 9.5     | 0.739368999 | 0.1402  | 1.325  |
| 161618_r_at | 291    | 134.7  | 190.1  | 243.7  | 194.3  | 309.1  | 167.5  | 141.9  | 0.823177337  | 214.875 | 203.2    | 11.675  | 1.057455709 | 0.8077  | -1.062 |
| 161619_f_at | 28.7   | 63.4   | 82.1   | 65     | 30     | 23.5   | 57.8   | 66.9   | 0.359518787  | 59.8    | 44.55    | 15.25   | 1.342312009 | 0.3865  | -1.375 |
| 161620_f_at | 54.6   | 38.6   | 39.2   | 38     | 57.2   | 44.8   | 60.5   | 40.4   | 0.244227561  | 42.6    | 50.725   | 8.125   | 0.839822573 | 0.2312  | 1.188  |
| 161621_r_at | 185.9  | 66.5   | 82.9   | 43.9   | 50.2   | 149.5  | 72     | 109.2  | 0.991533519  | 94.8    | 95.225   | 0.425   | 0.995536886 | 0.8662  | 1.07   |
| 161622_f_at | 8.8    | 16.8   | 0.9    | 11.3   | 1.4    | 5.3    | 22.9   | 19.8   | 0.661587471  | 9.45    | 12.35    | 2.9     | 0.765182186 | 0.8325  | 1.229  |
| 161623_at   | 8.5    | 6.4    | 14.1   | 2.3    | 2      | 27.9   | 2.7    | 2.4    | 0.899184664  | 7.825   | 8.75     | 0.925   | 0.894285714 | 0.6022  | -1.495 |
| 161624_r_at | 16     | 21     | 23.4   | 23.8   | 23     | 26.8   | 36.5   | 27.7   | 0.07758497   | 21.05   | 28.5     | 7.45    | 0.738596491 | 0.06379 | 1.35   |
| 161625_r_at | 22.5   | 32.8   | 30     | 33.7   | 24.7   | 24.8   | 33.4   | 67.3   | 0.503554371  | 29.75   | 37.55    | 7.8     | 0.792276964 | 0.5697  | 1.165  |
| 161626_f_at | 121.6  | 131    | 111.2  | 91.1   | 109.8  | 141.5  | 102.8  | 111.4  | 0.83414965   | 113.725 | 116.375  | 2.65    | 0.977228786 | 0.8238  | 1.025  |
| 161627_r_at | 65.9   | 155.4  | 74.3   | 48.3   | 54.9   | 106.6  | 112    | 77     | 0.95421095   | 85.975  | 87.625   | 1.65    | 0.981169757 | 0.8     | 1.082  |
| 161628_r_at | 10.4   | 8.9    | 6.1    | 6.8    | 6.8    | 9.9    | 10.6   | 7.4    | 0.66038406   | 8.05    | 8.675    | 0.625   | 0.92795389  | 0.6437  | 1.082  |
| 161629_i_at | 34.8   | 22.7   | 33.7   | 26.2   | 40.2   | 60.3   | 39.6   | 33.3   | 0.093054334  | 29.35   | 43.35    | 14      | 0.67704729  | 0.05698 | 1.464  |
| 161630_i_at | 72.1   | 16.8   | 20.3   | 47.7   | 39.8   | 71     | 38.8   | 27.1   | 0.768502981  | 39.225  | 44.175   | 4.95    | 0.887945671 | 0.5824  | 1.261  |
| 161631_f_at | 290.5  | 295.7  | 252.8  | 270.9  | 306.9  | 258.4  | 305.6  | 275    | 0.58168827   | 277.475 | 286.475  | 9       | 0.968583646 | 0.5932  | 1.032  |
| 161632_r_at | 420.3  | 323.1  | 367.4  | 521.6  | 431.1  | 194.6  | 430.1  | 352    | 0.455890279  | 408.1   | 351.95   | 56.15   | 1.159539707 | 0.4336  | -1.197 |
| 161633_r_at | 367.1  | 205.2  | 206.7  | 255.9  | 191.7  | 439.6  | 225.7  | 304.2  | 0.655632303  | 258.725 | 290.3    | 31.575  | 0.891233207 | 0.6966  | 1.098  |
| 161634_r_at | 9.9    | 6.6    | 6.5    | 4.6    | 7.2    | 5.7    | 3.9    | 2.5    | 0.217596384  | 6.9     | 4.825    | 2.075   | 1.430051813 | 0.2061  | -1.481 |
| 161635_f_at | 40     | 49.1   | 22     | 56.5   | 23.8   | 35.5   | 21.2   | 26.7   | 0.134204651  | 41.9    | 26.8     | 15.1    | 1.563432836 | 0.1349  | -1.502 |
| 161636_r_at | 2038   | 2016.8 | 2107.4 | 2607.6 | 2267.9 | 3239.6 | 2839.4 | 2817.9 | 0.05400065   | 2192.45 | 2791.2   | 598.75  | 0.785486529 | 0.04617 | 1.27   |
| 161637_f_at | 18.8   | 11.8   | 14.8   | 52.1   | 31.6   | 45     | 22.1   | 14.9   | 0.737342272  | 24.375  | 28.4     | 4.025   | 0.858274648 | 0.5563  | 1.287  |
| 161638_f_at | 196.6  | 155.8  | 145.2  | 168.8  | 163.2  | 267.9  | 153.6  | 112.8  | 0.835320537  | 166.6   | 174.375  | 7.775   | 0.955412186 | 0.9913  | 1.002  |
| 161639_f_at | 41.8   | 55.7   | 43.8   | 42.9   | 52.7   | 88.1   | 48.2   | 66.9   | 0.137865579  | 46.05   | 63.975   | 17.925  | 0.719812427 | 0.08666 | 1.36   |
| 161640_at   | 90.5   | 50.4   | 20.9   | 121.6  | 20.6   | 56.1   | 104.8  | 88     | 0.908300768  | 70.85   | 67.375   | 3.475   | 1.051576994 | 0.9704  | -1.021 |
| 161641_at   | 167.6  | 130.4  | 91.3   | 162.8  | 103.5  | 176.1  | 152.6  | 153.1  | 0.734507211  | 138.025 | 146.325  | 8.3     | 0.943276952 | 0.7206  | 1.07   |
| 161642_f_at | 4.9    | 3.9    | 1.1    | 2.4    | 1.8    | 5.2    | 2.9    | 2.7    | 0.948143981  | 3.075   | 3.15     | 0.075   | 0.976190476 | 0.8232  | 1.098  |
| 161643_i_at | 23.2   | 20     | 7.8    | 8.9    | 27.6   | 10.4   | 10.2   | 16.4   | 0.8417113638 | 14.975  | 16.15    | 1.175   | 0.927244582 | 0.7962  | 1.103  |
| 161644_f_at | 1118.9 | 953.4  | 962.7  | 1024.2 | 896.9  | 1092   | 863.2  | 915.4  | 0.300055602  | 1014.8  | 941.875  | 72.925  | 1.077425348 | 0.2747  | -1.08  |
| 161645_r_at | 6.5    | 5.4    | 3.9    | 4.8    | 4      | 6.4    | 4.7    | 5.2    | 0.922978039  | 5.15    | 5.075    | 0.075   | 1.014778325 | 0.9319  | -1.013 |
| 161646_r_at | 13.2   | 0.8    | 0.8    | 6.4    | 2.4    | 12.9   | 3.9    | 0.3    | 0.919795341  | 5.3     | 4.875    | 0.425   | 1.087179487 | 0.9061  | -1.139 |
| 161647_f_at | 12.9   | 7.3    | 15.7   | 14.6   | 8.3    | 46.5   | 8.9    | 9.1    | 0.600069679  | 12.625  | 18.2     | 5.575   | 0.693681319 | 0.8487  | 1.094  |
| 161648_at   | 725.6  | 639.3  | 497.7  | 499.5  | 643.9  | 641.3  | 569.9  | 482.4  | 0.930908268  | 590.525 | 584.375  | 6.15    | 1.010524064 | 0.9741  | 1.004  |
| 161649_f_at | 2.9    | 2.2    | 1.5    | 1.3    | 5      | 2.5    | 1.1    | 3.3    | 0.322577432  | 1.975   | 2.975    | 1       | 0.663865546 | 0.3944  | 1.393  |
| 161650_at   | 397.4  | 458.8  | 220.8  | 396.4  | 376.7  | 546.6  | 356    | 383.3  | 0.510951466  | 368.35  | 415.65   | 47.3    | 0.886202334 | 0.4834  | 1.152  |
| 161651_f_at | 29.3   | 25.9   | 13.3   | 25     | 26.1   | 40.5   | 17.3   | 39.3   | 0.308594468  | 23.375  | 30.8     | 7.425   | 0.758928571 | 0.3657  | 1.299  |
| 161652_r_at | 6.3    | 0.6    | 3.2    | 5.2    | 0.2    | 8.6    | 5.2    | 10.4   | 0.418735149  | 3.825   | 6.1      | 2.275   | 0.62704918  | 0.9005  | 1.142  |
| 161653_f_at | 48     | 9.7    | 4.6    | 19.4   | 18.5   | 39.2   | 6.3    | 25.4   | 0.877122694  | 20.425  | 22.35    | 1.925   | 0.913870246 | 0.7023  | 1.29   |
| 161654_r_at | 47.9   | 63.6   | 40     | 47.4   | 75.5   | 58.5   | 51.6   | 35.6   | 0.588650578  | 49.725  | 55.3     | 5.575   | 0.899186257 | 0.6609  | 1.088  |
| 161655_at   | 185.1  | 169.3  | 131.7  | 116.2  | 146    | 200.6  | 133.3  | 112.7  | 0.925026167  | 150.575 | 148.15   | 2.425   | 1.016368545 | 0.8989  | -1.022 |
| 161656_r_at | 97.9   | 49.4   | 74.9   | 93.3   | 78     | 75.1   | 92.7   | 82.4   | 0.799897361  | 78.875  | 82.05    | 3.175   | 0.961304083 | 0.6813  | 1.073  |
| 161657_f_at | 4428.9 | 5703.6 | 4080.6 | 4113.5 | 4968.7 | 3393   | 4761.1 | 4258.7 | 0.664854658  | 4581.65 | 4345.375 | 236.275 | 1.054373903 | 0.6585  | -1.055 |
| 161658_at   | 139.8  | 86.2   | 120    | 132.3  | 98.4   | 150.4  | 102.4  | 111.4  | 0.822959818  | 119.575 | 115.65   | 3.925   | 1.033938608 | 0.8343  | 1.032  |
| 161659_f_at | 49.6   | 73     | 48.4   | 24     | 51.3   | 31.9   | 50.5   | 20     | 0.444872403  | 48.75   | 38.425   | 10.325  | 1.26870527  | 0.4968  | -1.263 |
| 161660_r_at | 17.1   | 16.7   | 13.2   | 14.2   | 21.1   | 21.3   | 15.2   | 27     | 0.088306329  | 15.3    | 21.15    | 5.85    | 0.723404255 | 0.0624  | 1.36   |
| 161661_i_at | 1.7    | 1.8    | 1.3    | 1.2    | 1.1    | 2.2    | 1.7    | 1.4    | 0.732610389  | 1.5     | 1.6      | 0.1     | 0.9375      | 0.78    | 1.053  |
| 161662_f_at | 40.2   | 40.5   | 44     | 51.6   | 56.3   | 60.1   | 10.7   | 11.2   | 0.540676331  | 44.075  | 34.575   | 9.5     | 1.274765004 | 0.2991  | -1.737 |
| 161663_f_at | 34.1   | 86.7   | 30     | 95.2   | 108.9  | 126.8  | 36.8   | 69.9   | 0.397870638  | 61.5    | 85.6     | 24.1    | 0.718457944 | 0.4165  | 1.431  |



|             |       |       |       |       |        |       |       |       |             |         |         |             |             |         |        |
|-------------|-------|-------|-------|-------|--------|-------|-------|-------|-------------|---------|---------|-------------|-------------|---------|--------|
| 161664_at   | 15.3  | 31.9  | 16.7  | 11.8  | 18.5   | 45.2  | 20.2  | 28.3  | 0.276386966 | 18.925  | 28.05   | 9.125       | 0.674688057 | 0.22    | 1.494  |
| 161665_at   | 26.7  | 10.3  | 19.4  | 14.4  | 30.6   | 41.8  | 29.4  | 16.6  | 0.111822613 | 17.7    | 29.6    | 11.9        | 0.597972973 | 0.1115  | 1.687  |
| 161666_f_at | 124.3 | 144.4 | 127.9 | 163.5 | 163.2  | 93.1  | 100.5 | 90.3  | 0.212523533 | 140.025 | 111.775 | 28.25       | 1.252739879 | 0.1504  | -1.285 |
| 161667_r_at | 15    | 8.9   | 11.3  | 20.9  | 17.5   | 19.2  | 24.6  | 18    | 0.118049762 | 14.025  | 19.825  | 5.8         | 0.707440101 | 0.09912 | 1.476  |
| 161668_f_at | 27.3  | 31.5  | 21.3  | 33.1  | 48.9   | 30    | 44.6  | 20.3  | 0.343314669 | 28.3    | 35.95   | 7.65        | 0.787204451 | 0.416   | 1.216  |
| 161669_r_at | 1.4   | 1.2   | 0.1   | 0.3   | 1.1    | 2.6   | 5.2   | 10.9  | 0.145791193 | 0.75    | 4.95    | 4.2         | 0.151515152 | 0.05702 | 8.526  |
| 161670_f_at | 13.6  | 58.4  | 24.6  | 58.8  | 25.5   | 59    | 50.1  | 13.5  | 0.91133246  | 38.85   | 37.025  | 1.825       | 1.04929102  | 0.9504  | -1.032 |
| 161671_at   | 188.9 | 101.9 | 105.3 | 109.8 | 109    | 188.4 | 119   | 117.4 | 0.81075249  | 126.475 | 133.45  | 6.975       | 0.947733233 | 0.7522  | 1.066  |
| 161672_at   | 2.5   | 2.2   | 2.4   | 2.7   | 0.8    | 2.7   | 4     | 2.1   | 0.945222862 | 2.45    | 2.4     | 0.05        | 1.020833333 | 0.629   | -1.187 |
| 161673_r_at | 28.1  | 12.8  | 2.2   | 6.7   | 13.2   | 34.1  | 8.9   | 12.9  | 0.569517258 | 12.45   | 17.275  | 4.825       | 0.720694645 | 0.3866  | 1.764  |
| 161674_i_at | 44.5  | 69.8  | 59.3  | 32.6  | 31.7   | 117.2 | 44.7  | 50.2  | 0.674699445 | 51.55   | 60.95   | 9.4         | 0.845775226 | 0.8102  | 1.085  |
| 161675_f_at | 32    | 29.3  | 26.5  | 137.5 | 55.1   | 35.7  | 45.3  | 151.7 | 0.696378451 | 56.325  | 71.95   | 15.625      | 0.782835302 | 0.5191  | 1.411  |
| 161676_at   | 38    | 15.8  | 35.2  | 46.7  | 35.1   | 44.2  | 35.3  | 41.6  | 0.502170633 | 33.925  | 39.05   | 5.125       | 0.868758003 | 0.4263  | 1.232  |
| 161677_r_at | 53.1  | 37.1  | 39.7  | 40.1  | 36.8   | 46.8  | 75.6  | 32.7  | 0.625107853 | 42.5    | 47.975  | 5.475       | 0.885878061 | 0.717   | 1.08   |
| 161678_at   | 156.4 | 133.7 | 110.3 | 168.2 | 59.9   | 184.5 | 122.2 | 112.6 | 0.473951116 | 142.15  | 119.8   | 22.35       | 1.186560935 | 0.3863  | -1.264 |
| 161679_r_at | 3.8   | 2.9   | 4.4   | 0.8   | 1.4    | 3     | 3.6   | 2.8   | 0.776181858 | 2.975   | 2.7     | 0.275       | 1.101851852 | 0.9912  | 1.005  |
| 161680_r_at | 110.9 | 258   | 176.1 | 89    | 79     | 140.1 | 79.3  | 232   | 0.638764666 | 158.5   | 132.6   | 25.9        | 1.195324284 | 0.5951  | -1.218 |
| 161681_i_at | 146.9 | 71.1  | 77.2  | 122.4 | 69.9   | 181.7 | 44.2  | 76.2  | 0.760729692 | 104.4   | 93      | 11.4        | 1.122580645 | 0.5661  | -1.232 |
| 161682_f_at | 332.4 | 269   | 267.9 | 370.1 | 220.8  | 335   | 263.8 | 289.2 | 0.382588437 | 309.85  | 277.2   | 32.65       | 1.117784993 | 0.3778  | -1.12  |
| 161683_r_at | 738.7 | 427.6 | 487.3 | 635.1 | 524.9  | 932.5 | 576.5 | 619.6 | 0.462740464 | 572.175 | 663.375 | 91.2        | 0.862521198 | 0.4436  | 1.156  |
| 161684_r_at | 142.9 | 107.7 | 100.7 | 124.3 | 113.7  | 179.4 | 105.2 | 109.6 | 0.703421833 | 118.9   | 126.975 | 8.075       | 0.936404804 | 0.7473  | 1.051  |
| 161685_r_at | 3.5   | 11.7  | 13    | 8.4   | 8.1    | 24.2  | 13.8  | 10.6  | 0.278447206 | 9.15    | 14.175  | 5.025       | 0.645502646 | 0.2685  | 1.589  |
| 161686_i_at | 2.5   | 0.6   | 0.4   | 0.6   | 0.8    | 1.9   | 0.4   | 1.4   | 0.872635532 | 1.025   | 1.125   | 0.1         | 0.911111111 | 0.6539  | 1.287  |
| 161687_r_at | 133.1 | 97    | 93.2  | 77    | 77.8   | 89.4  | 60.8  | 55    | 0.091661284 | 100.075 | 70.75   | 29.325      | 1.414487633 | 0.07317 | -1.412 |
| 161688_r_at | 522.6 | 472.1 | 451.9 | 427.1 | 429.5  | 569.1 | 291.7 | 411   | 0.516914988 | 468.425 | 425.325 | 43.1        | 1.101334274 | 0.43    | -1.129 |
| 161689_f_at | 174.5 | 204.4 | 120.3 | 158   | 195.8  | 159.1 | 77.4  | 128.9 | 0.465482143 | 164.3   | 140.3   | 24          | 1.17106201  | 0.426   | -1.215 |
| 161690_at   | 1.9   | 3.8   | 1.1   | 5.7   | 9.2    | 17.1  | 6.5   | 4.4   | 0.109119897 | 3.125   | 9.3     | 6.175       | 0.336021505 | 0.04669 | 3.149  |
| 161691_at   | 15.9  | 24.3  | 16.9  | 27.9  | 7.4    | 26.4  | 6.8   | 22    | 0.380148364 | 21.25   | 15.65   | 5.6         | 1.357827476 | 0.2737  | -1.581 |
| 161692_r_at | 11    | 14.4  | 1.6   | 0.9   | 6.3    | 18.1  | 3.3   | 11.5  | 0.568640813 | 6.975   | 9.8     | 2.825       | 0.711734694 | 0.3852  | 2.084  |
| 161693_r_at | 45.5  | 18.5  | 8.8   | 26.5  | 24.9   | 19.8  | 14.4  | 28.4  | 0.742462469 | 24.825  | 21.875  | 2.95        | 1.134857143 | 0.9879  | 1.006  |
| 161694_f_at | 25    | 28.7  | 30.3  | 40.9  | 28.7   | 32.2  | 39.1  | 23.8  | 0.955136311 | 31.225  | 30.95   | 0.275       | 1.008885299 | 0.957   | -1.008 |
| 161695_f_at | 223.1 | 110.7 | 135.2 | 107.9 | 85.6   | 176   | 73.5  | 108.1 | 0.382342452 | 144.225 | 110.8   | 33.425      | 1.301669675 | 0.321   | -1.317 |
| 161696_f_at | 36.3  | 45.6  | 39.7  | 37.1  | 37.7   | 45    | 66.2  | 44.3  | 0.263043276 | 39.675  | 48.3    | 8.625       | 0.821428571 | 0.2199  | 1.195  |
| 161697_r_at | 14.1  | 10.4  | 9.9   | 43.7  | 26.1   | 49.5  | 28.1  | 18.4  | 0.33650497  | 19.525  | 30.525  | 11          | 0.63963964  | 0.1946  | 1.798  |
| 161698_f_at | 285.7 | 416.8 | 451.3 | 578.3 | 407.5  | 279.8 | 407.4 | 462.4 | 0.566911013 | 433.025 | 389.275 | 43.75       | 1.112388414 | 0.6302  | -1.097 |
| 161699_i_at | 15.9  | 9.3   | 24.6  | 39.9  | 26.6   | 79    | 17    | 21.6  | 0.437380153 | 22.425  | 36.05   | 13.625      | 0.622052705 | 0.3977  | 1.52   |
| 161700_i_at | 3.2   | 1.1   | 1.4   | 0.5   | 0.5    | 2.8   | 0.9   | 2     | 1           | 1.55    | 1.55    | 2.22045E-16 | 1           | 0.982   | 1.013  |
| 161701_at   | 69.4  | 60.7  | 47.5  | 60.8  | 50.9   | 69.5  | 85.8  | 55.6  | 0.547984761 | 59.6    | 65.45   | 5.85        | 0.910618793 | 0.5826  | 1.086  |
| 161702_f_at | 68.5  | 82.8  | 35.1  | 52.1  | 69.6   | 83.6  | 92.7  | 64.2  | 0.201041156 | 59.625  | 77.525  | 17.9        | 0.76910674  | 0.1908  | 1.352  |
| 161703_f_at | 626.4 | 875.4 | 669   | 670.6 | 1080.3 | 885   | 663.7 | 585.9 | 0.493162633 | 710.35  | 803.725 | 93.375      | 0.883822203 | 0.5354  | 1.109  |
| 161704_r_at | 1.5   | 1     | 1     | 1.2   | 1.7    | 2.8   | 1.4   | 1     | 0.252867123 | 1.175   | 1.725   | 0.55        | 0.68115942  | 0.2224  | 1.408  |
| 161705_r_at | 35.7  | 11    | 17.7  | 6.4   | 15.8   | 42.7  | 24.5  | 15.4  | 0.475439627 | 17.7    | 24.6    | 6.9         | 0.719512195 | 0.3547  | 1.55   |
| 161706_f_at | 212.8 | 316.8 | 575.3 | 579.7 | 402.4  | 304.2 | 503.5 | 550.5 | 0.867117638 | 421.15  | 440.15  | 19          | 0.956832898 | 0.7245  | 1.108  |
| 161707_f_at | 140.9 | 97.3  | 97.1  | 62.2  | 76.4   | 183.9 | 81.9  | 85.3  | 0.814679261 | 99.375  | 106.875 | 7.5         | 0.929824561 | 0.8783  | 1.043  |
| 161708_f_at | 76    | 66.3  | 77.4  | 80.9  | 74.6   | 92.2  | 126.6 | 90.9  | 0.15005256  | 75.15   | 96.075  | 20.925      | 0.782201405 | 0.09773 | 1.259  |
| 161709_at   | 50.6  | 47.9  | 48.3  | 54.2  | 53.5   | 49    | 38.2  | 44.3  | 0.324651218 | 50.25   | 46.25   | 4           | 1.086486486 | 0.2948  | -1.093 |
| 161710_r_at | 18.9  | 7.1   | 6.9   | 8.4   | 2.5    | 6.5   | 3.5   | 7.9   | 0.169718169 | 10.325  | 5.1     | 5.225       | 2.024509804 | 0.0934  | -2.045 |
| 161711_f_at | 7     | 2.1   | 0.9   | 2.6   | 3      | 6.1   | 3.9   | 1.9   | 0.733754382 | 3.15    | 3.725   | 0.575       | 0.845637584 | 0.5082  | 1.402  |
| 161712_r_at | 341.3 | 264   | 271.9 | 282.7 | 212    | 325.8 | 216.2 | 259.9 | 0.299835707 | 289.975 | 253.475 | 36.5        | 1.143998422 | 0.2565  | -1.156 |
| 161713_f_at | 49.3  | 32.1  | 25.9  | 37.3  | 38.8   | 50.1  | 31.7  | 42.4  | 0.492450671 | 36.15   | 40.75   | 4.6         | 0.887116564 | 0.4469  | 1.144  |
| 161714_f_at | 18.9  | 16.5  | 9.2   | 2.5   | 1.4    | 25    | 13.5  | 12.7  | 0.829242205 | 11.775  | 13.15   | 1.375       | 0.895437262 | 0.9614  | -1.04  |
| 161715_f_at | 309   | 361.5 | 233.8 | 259.6 | 364.9  | 378.7 | 260.3 | 300.8 | 0.408011097 | 290.975 | 326.175 | 35.2        | 0.892082471 | 0.4033  | 1.124  |
| 161716_at   | 19    | 44.6  | 21.7  | 35.3  | 14     | 64    | 36.3  | 42.8  | 0.479402767 | 30.15   | 39.275  | 9.125       | 0.767663908 | 0.6306  | 1.211  |
| 161717_i_at | 6.7   | 31.9  | 32.2  | 28.3  | 34.5   | 56.5  | 28.7  | 28.6  | 0.220831607 | 24.775  | 37.075  | 12.3        | 0.668240054 | 0.2513  | 1.69   |
| 161718_at   | 9.7   | 8.4   | 7.2   | 22.9  | 5.6    | 20.3  | 33.1  | 26    | 0.238675948 | 12.05   | 21.25   | 9.2         | 0.567058824 | 0.3344  | 1.644  |
| 161719_f_at | 537.9 | 418.9 | 409.8 | 560.7 | 314.3  | 643.4 | 367.3 | 357.6 | 0.506115074 | 481.825 | 420.65  | 61.175      | 1.145429692 | 0.3869  | -1.182 |



|             |       |       |       |       |       |       |       |       |             |         |         |        |             |         |        |
|-------------|-------|-------|-------|-------|-------|-------|-------|-------|-------------|---------|---------|--------|-------------|---------|--------|
| 161720_r_at | 26.2  | 2     | 13.5  | 32.1  | 7.7   | 21.3  | 1.4   | 3.3   | 0.26741047  | 18.45   | 8.425   | 10.025 | 2.189910979 | 0.3601  | -2.343 |
| 161721_f_at | 43.5  | 31    | 9.2   | 49.1  | 55.6  | 16.3  | 28.7  | 21.2  | 0.832556254 | 33.2    | 30.45   | 2.75   | 1.090311987 | 0.9562  | 1.027  |
| 161722_f_at | 56.1  | 62.2  | 57.3  | 82.7  | 67.6  | 51.4  | 53.5  | 81.9  | 0.920840642 | 64.575  | 63.6    | 0.975  | 1.015330189 | 0.8864  | -1.021 |
| 161723_at   | 79.9  | 106.2 | 89.7  | 94.2  | 104.7 | 108   | 108.2 | 109.7 | 0.066660394 | 92.5    | 107.65  | 15.15  | 0.85926614  | 0.03932 | 1.169  |
| 161724_r_at | 8.9   | 2.1   | 0.4   | 6.2   | 0.8   | 11.1  | 0.6   | 8.8   | 0.791422788 | 4.4     | 5.325   | 0.925  | 0.82629108  | 0.9992  | 1.001  |
| 161725_r_at | 21.8  | 24.5  | 12.1  | 9.2   | 12.4  | 36.5  | 20.8  | 20.2  | 0.410447628 | 16.9    | 22.475  | 5.575  | 0.751946607 | 0.4032  | 1.336  |
| 161726_f_at | 273.7 | 143   | 156.3 | 265.5 | 156.2 | 243.6 | 229.1 | 206.6 | 0.985705531 | 209.625 | 208.875 | 0.75   | 1.003590664 | 0.9002  | 1.026  |
| 161727_r_at | 24.8  | 1.6   | 1.4   | 1.2   | 0.8   | 10.1  | 2.7   | 6.9   | 0.750617865 | 7.25    | 5.125   | 2.125  | 1.414634146 | 0.8145  | 1.251  |
| 161728_f_at | 1.4   | 5.2   | 2.6   | 0.8   | 2.3   | 2.2   | 1.3   | 3     | 0.78725995  | 2.5     | 2.2     | 0.3    | 1.136363636 | 0.8816  | 1.073  |
| 161729_f_at | 131   | 115.8 | 130.6 | 110.3 | 104.5 | 127.7 | 115.2 | 121.7 | 0.54358999  | 121.925 | 117.275 | 4.65   | 1.039650394 | 0.5457  | -1.04  |
| 161730_f_at | 7     | 4.3   | 1.8   | 7.8   | 5.2   | 6.5   | 6.5   | 5.4   | 0.66115102  | 5.225   | 5.9     | 0.675  | 0.88559322  | 0.4843  | 1.29   |
| 161731_at   | 7.4   | 4.1   | 2.9   | 6.9   | 2.5   | 7.7   | 3.9   | 8.7   | 0.845878966 | 5.325   | 5.7     | 0.375  | 0.934210526 | 0.9558  | 1.021  |
| 161732_at   | 3.8   | 3.4   | 3.4   | 2.3   | 3.8   | 5.8   | 1.4   | 1.8   | 0.982486233 | 3.225   | 3.2     | 0.025  | 1.0078125   | 0.6839  | -1.159 |
| 161733_at   | 4.9   | 2.1   | 0.8   | 1     | 4.2   | 2.1   | 10    | 1.4   | 0.358546764 | 2.2     | 4.425   | 2.225  | 0.497175141 | 0.2996  | 1.958  |
| 161734_r_at | 276.1 | 142.3 | 136.2 | 211.4 | 130.9 | 256.3 | 198.5 | 77.7  | 0.633724449 | 191.5   | 165.85  | 25.65  | 1.154657823 | 0.5518  | -1.216 |
| 161735_r_at | 204   | 117.3 | 65    | 84.2  | 80.2  | 324.1 | 58.6  | 90.7  | 0.778463888 | 117.625 | 138.4   | 20.775 | 0.849891618 | 0.9775  | 1.013  |
| 161736_r_at | 27.8  | 29.4  | 3.4   | 15.8  | 7.4   | 28.2  | 6.1   | 4.5   | 0.394602436 | 19.1    | 11.55   | 7.55   | 1.653679654 | 0.4538  | -1.675 |
| 161737_at   | 230.7 | 201.2 | 200.7 | 234.1 | 216.4 | 268.1 | 209.6 | 239.3 | 0.343547218 | 216.675 | 233.35  | 16.675 | 0.928540819 | 0.3404  | 1.075  |
| 161738_f_at | 126.1 | 120.6 | 163.2 | 195.4 | 179.1 | 118.2 | 208.1 | 210   | 0.359271212 | 151.325 | 178.85  | 27.525 | 0.846100084 | 0.3939  | 1.175  |
| 161739_r_at | 38.7  | 16.8  | 53.4  | 37.7  | 12    | 38.2  | 38.8  | 29    | 0.493316215 | 36.65   | 29.5    | 7.15   | 1.242372881 | 0.5503  | -1.264 |
| 161740_r_at | 135.7 | 109.5 | 69    | 166.5 | 91.2  | 280.3 | 151.5 | 152.9 | 0.331183878 | 120.175 | 168.975 | 48.8   | 0.711199882 | 0.3359  | 1.365  |
| 161741_r_at | 15.3  | 4.8   | 6.6   | 16.9  | 22.8  | 20.4  | 16.6  | 4.9   | 0.33472921  | 10.9    | 16.175  | 5.275  | 0.673879444 | 0.449   | 1.467  |
| 161742_r_at | 9.7   | 11.3  | 10.6  | 5.3   | 17.4  | 9.5   | 32    | 7.7   | 0.274576544 | 9.225   | 16.65   | 7.425  | 0.554054054 | 0.2442  | 1.606  |
| 161743_i_at | 16.3  | 17.8  | 8.6   | 9.8   | 9.4   | 15.4  | 12.7  | 8.2   | 0.570939296 | 13.125  | 11.425  | 1.7    | 1.148796499 | 0.6075  | -1.133 |
| 161744_f_at | 19.5  | 4.4   | 0.9   | 0.6   | 0.7   | 26.7  | 1.3   | 14.8  | 0.577396129 | 6.35    | 10.875  | 4.525  | 0.583908046 | 0.6725  | 1.706  |
| 161745_f_at | 238.4 | 222.7 | 229.8 | 206   | 201.4 | 231.6 | 311.9 | 280.4 | 0.287804688 | 224.225 | 256.325 | 32.1   | 0.87476836  | 0.2818  | 1.129  |
| 161746_i_at | 0.9   | 0.9   | 0.4   | 0.5   | 0.9   | 3.2   | 0.6   | 0.7   | 0.35899729  | 0.675   | 1.35    | 0.675  | 0.5         | 0.2986  | 1.648  |
| 161747_i_at | 123.3 | 62.5  | 60.1  | 77.5  | 56.2  | 124.9 | 88.9  | 89    | 0.676387534 | 80.85   | 89.75   | 8.9    | 0.900835655 | 0.6563  | 1.115  |
| 161748_r_at | 22.3  | 10.9  | 15.1  | 17.1  | 13    | 21.9  | 13.1  | 19.9  | 0.856129445 | 16.35   | 16.975  | 0.625  | 0.963181149 | 0.8509  | 1.041  |
| 161749_r_at | 242.9 | 54.3  | 190.8 | 102.7 | 124.8 | 247.2 | 173   | 158.6 | 0.595072555 | 147.675 | 175.9   | 28.225 | 0.839539511 | 0.4471  | 1.345  |
| 161750_f_at | 76.3  | 77.4  | 106.6 | 121.5 | 103.1 | 135.7 | 168.9 | 119.5 | 0.091536753 | 95.45   | 131.8   | 36.35  | 0.724203338 | 0.08215 | 1.386  |
| 161751_f_at | 83.6  | 136.4 | 77.5  | 97.5  | 110.9 | 92.3  | 90.6  | 86    | 0.80383846  | 98.75   | 94.95   | 3.8    | 1.040021064 | 0.8938  | -1.019 |
| 161752_r_at | 16.8  | 10.4  | 17.8  | 26.5  | 8.6   | 18.6  | 15.7  | 21.7  | 0.704782877 | 17.875  | 16.15   | 1.725  | 1.106811146 | 0.7295  | -1.107 |
| 161753_f_at | 16.3  | 46.1  | 31.1  | 14.9  | 7.9   | 14.6  | 28.5  | 36.8  | 0.619016839 | 27.1    | 21.95   | 5.15   | 1.234624146 | 0.5687  | -1.303 |
| 161754_f_at | 117.9 | 168.4 | 110.6 | 129.3 | 161.3 | 124.5 | 147.7 | 153.1 | 0.36341823  | 131.55  | 146.65  | 15.1   | 0.897033754 | 0.3193  | 1.125  |
| 161755_at   | 27    | 18.6  | 47.6  | 41.7  | 24.6  | 36.8  | 16.1  | 19    | 0.284582937 | 33.725  | 24.125  | 9.6    | 1.397927461 | 0.297   | -1.377 |
| 161756_at   | 173.3 | 87.1  | 102.6 | 91.4  | 117.8 | 139   | 87.1  | 161.3 | 0.638681257 | 113.6   | 126.3   | 12.7   | 0.899445764 | 0.5784  | 1.129  |
| 161757_f_at | 334.1 | 308.2 | 258.5 | 333   | 432.1 | 398.3 | 273.3 | 385.7 | 0.166510814 | 308.45  | 372.35  | 63.9   | 0.82838727  | 0.1791  | 1.196  |
| 161758_r_at | 102.7 | 161.6 | 172.3 | 139.6 | 197.3 | 196.5 | 166.2 | 203.6 | 0.047548359 | 144.05  | 190.9   | 46.85  | 0.754583552 | 0.0534  | 1.347  |
| 161759_r_at | 80.4  | 59.9  | 21.2  | 27.6  | 51.8  | 80    | 44.2  | 97.2  | 0.301919657 | 47.275  | 68.3    | 21.025 | 0.692166911 | 0.2533  | 1.586  |
| 161760_s_at | 94.5  | 128.9 | 182.3 | 169.7 | 154.9 | 140.1 | 107.8 | 144.7 | 0.770031622 | 143.85  | 136.875 | 6.975  | 1.050958904 | 0.8801  | 1.027  |
| 161761_r_at | 53.9  | 24.8  | 9.5   | 8.8   | 37.1  | 24.3  | 10.7  | 13.9  | 0.829901938 | 24.25   | 21.5    | 2.75   | 1.127906977 | 0.9328  | 1.046  |
| 161762_at   | 4.8   | 6.7   | 4.2   | 4.9   | 4.8   | 4.2   | 3.3   | 3.7   | 0.128110076 | 5.15    | 4       | 1.15   | 1.2875      | 0.09431 | -1.288 |
| 161763_r_at | 605.5 | 796   | 602.4 | 319.7 | 623.9 | 889.2 | 259.3 | 382.4 | 0.813491832 | 580.9   | 538.7   | 42.2   | 1.078336737 | 0.7077  | -1.14  |
| 161764_r_at | 3.8   | 1.8   | 0.9   | 0.9   | 1.5   | 16.4  | 0.4   | 1.2   | 0.492322563 | 1.85    | 4.875   | 3.025  | 0.379487179 | 0.85    | 1.185  |
| 161765_f_at | 220.1 | 237   | 191.3 | 165.3 | 272.1 | 226.9 | 184.4 | 196.7 | 0.534422829 | 203.425 | 220.025 | 16.6   | 0.924554028 | 0.5396  | 1.079  |
| 161766_i_at | 23.5  | 29.5  | 15.4  | 28.8  | 39.7  | 6.7   | 6.4   | 30    | 0.710631471 | 24.3    | 20.7    | 3.6    | 1.173913043 | 0.4118  | -1.561 |
| 161767_r_at | 575.4 | 474.8 | 651.6 | 510.3 | 402.4 | 694.3 | 513.2 | 689.4 | 0.799816237 | 553.025 | 574.825 | 21.8   | 0.962075414 | 0.8919  | -1.021 |
| 161768_r_at | 46.8  | 29.8  | 39.2  | 42.1  | 41.5  | 61.8  | 55.1  | 41.7  | 0.144876573 | 39.475  | 50.025  | 10.55  | 0.789105447 | 0.1424  | 1.265  |
| 161769_r_at | 89.6  | 100.6 | 57.8  | 65.9  | 99.5  | 142.2 | 86.4  | 64.9  | 0.348511633 | 78.475  | 98.25   | 19.775 | 0.798727735 | 0.3537  | 1.233  |
| 161770_f_at | 104.6 | 107   | 114.6 | 143.1 | 117.1 | 113.4 | 132.3 | 133   | 0.546156862 | 117.325 | 123.95  | 6.625  | 0.946551029 | 0.4923  | 1.062  |
| 161771_r_at | 406.7 | 404.2 | 418.7 | 448.6 | 442   | 316.3 | 324   | 344.8 | 0.116073989 | 419.55  | 356.775 | 62.775 | 1.17595123  | 0.0779  | -1.186 |
| 161772_i_at | 155.8 | 127.1 | 131.9 | 152.2 | 97.7  | 206.3 | 164   | 163   | 0.537731332 | 141.75  | 157.75  | 16     | 0.898573693 | 0.6631  | 1.079  |
| 161773_i_at | 23.3  | 16.4  | 26.4  | 31.8  | 24.5  | 50.1  | 22.4  | 19.3  | 0.584996124 | 24.475  | 29.075  | 4.6    | 0.841788478 | 0.6411  | 1.133  |
| 161774_f_at | 426   | 456.9 | 324.7 | 423.7 | 450   | 465.1 | 402.8 | 388.8 | 0.603439005 | 407.825 | 426.675 | 18.85  | 0.955821175 | 0.5805  | 1.052  |
| 161775_f_at | 4.8   | 4.9   | 3.4   | 8     | 5     | 8.5   | 6.1   | 20.1  | 0.276151109 | 5.275   | 9.925   | 4.65   | 0.531486146 | 0.1911  | 1.683  |



|             |        |       |        |       |       |        |        |        |             |          |         |         |             |         |        |
|-------------|--------|-------|--------|-------|-------|--------|--------|--------|-------------|----------|---------|---------|-------------|---------|--------|
| 161776_at   | 83.8   | 58.8  | 69.5   | 74.7  | 71.4  | 131.6  | 81.7   | 57.3   | 0.466476521 | 71.7     | 85.5    | 13.8    | 0.838596491 | 0.5054  | 1.145  |
| 161777_f_at | 23.6   | 12    | 15.4   | 17.2  | 15.2  | 21.8   | 21.7   | 13.1   | 0.794606402 | 17.05    | 17.95   | 0.9     | 0.949860724 | 0.7801  | 1.057  |
| 161778_i_at | 67.9   | 88.2  | 47.7   | 111.7 | 63.1  | 57.7   | 100.9  | 101.7  | 0.916878467 | 78.875   | 80.85   | 1.975   | 0.975572047 | 0.871   | 1.041  |
| 161779_r_at | 266.8  | 262.6 | 215.4  | 228.9 | 169.5 | 369.6  | 179.5  | 248    | 0.972412465 | 243.425  | 241.65  | 1.775   | 1.007345334 | 0.7838  | -1.055 |
| 161780_f_at | 2.7    | 4.3   | 1.4    | 1.8   | 1.6   | 2.9    | 3.2    | 1.6    | 0.78150153  | 2.55     | 2.325   | 0.225   | 1.096774194 | 0.887   | -1.046 |
| 161781_at   | 90.2   | 77.3  | 67.1   | 45.9  | 48.8  | 77.1   | 58.6   | 57.5   | 0.424452294 | 70.125   | 60.5    | 9.625   | 1.159090909 | 0.4773  | -1.14  |
| 161782_r_at | 17.5   | 25.1  | 15.6   | 21.2  | 8     | 51.5   | 8.6    | 14.5   | 0.94424272  | 19.85    | 20.65   | 0.8     | 0.96125908  | 0.5796  | -1.297 |
| 161783_at   | 10.4   | 24.8  | 5.7    | 7.5   | 10.2  | 8.9    | 6      | 10.6   | 0.523499523 | 12.1     | 8.925   | 3.175   | 1.355742297 | 0.6503  | -1.178 |
| 161784_f_at | 122.1  | 71.2  | 103.7  | 108.7 | 90    | 151.3  | 177.1  | 119    | 0.194679843 | 101.425  | 134.35  | 32.925  | 0.75493115  | 0.2032  | 1.308  |
| 161785_f_at | 65.3   | 74.5  | 101.2  | 75.6  | 76.1  | 98.2   | 81.6   | 63.7   | 0.945470617 | 79.15    | 79.9    | 0.75    | 0.990613267 | 0.9326  | 1.011  |
| 161786_f_at | 751.4  | 607.7 | 679.6  | 671.1 | 796   | 814.9  | 798.5  | 747.3  | 0.02350287  | 677.45   | 789.175 | 111.725 | 0.858428105 | 0.01685 | 1.168  |
| 161787_f_at | 303.2  | 394.4 | 445.1  | 556.6 | 275.1 | 268.6  | 311.7  | 367.7  | 0.105970309 | 424.825  | 305.775 | 119.05  | 1.389338566 | 0.07508 | -1.368 |
| 161788_f_at | 43.4   | 68.1  | 80.5   | 64.7  | 68.6  | 78.3   | 47.1   | 61.2   | 0.971715271 | 64.175   | 63.8    | 0.375   | 1.005877743 | 0.9934  | 1.001  |
| 161789_r_at | 47.7   | 8.2   | 20.5   | 19.8  | 20.8  | 46.3   | 23.4   | 14.8   | 0.841073631 | 24.05    | 26.325  | 2.275   | 0.913580247 | 0.6778  | 1.208  |
| 161790_at   | 12.9   | 4.5   | 5.4    | 7.3   | 17.6  | 46.2   | 13.5   | 8      | 0.203926836 | 7.525    | 21.325  | 13.8    | 0.352872216 | 0.08081 | 2.488  |
| 161791_r_at | 200.9  | 269.2 | 153.4  | 197.1 | 155.2 | 442.6  | 100.9  | 244.7  | 0.718555236 | 205.15   | 235.85  | 30.7    | 0.869832521 | 0.9795  | -1.009 |
| 161792_f_at | 18.4   | 15.4  | 14.8   | 12.2  | 16.2  | 22.6   | 14.4   | 11.8   | 0.707263082 | 15.2     | 16.25   | 1.05    | 0.935384615 | 0.7629  | 1.052  |
| 161793_at   | 12.3   | 11.6  | 10.3   | 13    | 3.5   | 21.6   | 6.7    | 9.7    | 0.743838058 | 11.8     | 10.375  | 1.425   | 1.137349398 | 0.41    | -1.401 |
| 161794_i_at | 8      | 4.1   | 1.9    | 14.2  | 11.7  | 6.8    | 9      | 5.6    | 0.703207714 | 7.05     | 8.275   | 1.225   | 0.851963746 | 0.442   | 1.469  |
| 161795_r_at | 13.8   | 2.8   | 2.7    | 15.3  | 15.4  | 17.2   | 5.3    | 7.2    | 0.582712344 | 8.65     | 11.275  | 2.625   | 0.767184035 | 0.4374  | 1.597  |
| 161796_r_at | 262.6  | 198.2 | 182.8  | 189.9 | 215.6 | 385.9  | 199.4  | 153.6  | 0.607139721 | 208.375  | 238.625 | 30.25   | 0.873232059 | 0.6982  | 1.09   |
| 161797_r_at | 46.2   | 9.5   | 17.8   | 3.6   | 6.9   | 82.6   | 39.1   | 43.9   | 0.246533137 | 19.275   | 43.125  | 23.85   | 0.446956522 | 0.2854  | 2.424  |
| 161798_r_at | 161.9  | 83.4  | 66.8   | 143.1 | 30.1  | 180.1  | 96.1   | 103.4  | 0.777310719 | 113.8    | 102.425 | 11.375  | 1.111056871 | 0.6311  | -1.244 |
| 161799_r_at | 183.2  | 179.3 | 73     | 22.9  | 79.2  | 163.3  | 105.2  | 153.9  | 0.819313106 | 114.6    | 125.4   | 10.8    | 0.913875598 | 0.5435  | 1.397  |
| 161800_r_at | 35.6   | 8.9   | 6.7    | 11.3  | 5.5   | 39.9   | 3.8    | 3.8    | 0.838862097 | 15.625   | 13.25   | 2.375   | 1.179245283 | 0.4846  | -1.648 |
| 161801_r_at | 2.3    | 1     | 26.3   | 1.3   | 25.6  | 7.6    | 8      | 18.5   | 0.382772667 | 7.725    | 14.925  | 7.2     | 0.51758794  | 0.1164  | 4.34   |
| 161802_i_at | 93.5   | 58.9  | 48.9   | 65.2  | 64.4  | 56.5   | 44.8   | 49.7   | 0.28729272  | 66.625   | 53.85   | 12.775  | 1.237233055 | 0.2641  | -1.214 |
| 161803_r_at | 10.2   | 9.7   | 9.3    | 40.7  | 23.6  | 35     | 13.2   | 9.6    | 0.776069702 | 17.475   | 20.35   | 2.875   | 0.858722359 | 0.5965  | 1.294  |
| 161804_r_at | 5      | 13    | 6.4    | 0.2   | 6.6   | 3.7    | 2.6    | 0.3    | 0.383788791 | 6.15     | 3.3     | 2.85    | 1.863636364 | 0.7362  | -1.469 |
| 161805_r_at | 45.8   | 14.3  | 7.7    | 10.6  | 22.1  | 44.4   | 25.6   | 8.6    | 0.645964725 | 19.6     | 25.175  | 5.575   | 0.778550149 | 0.5242  | 1.42   |
| 161806_r_at | 19.4   | 39.2  | 12.5   | 35.6  | 25.9  | 42.1   | 33.1   | 41.9   | 0.280017476 | 26.675   | 35.75   | 9.075   | 0.746153846 | 0.2475  | 1.455  |
| 161807_i_at | 3.4    | 7.7   | 1.1    | 3.4   | 1.3   | 5.3    | 1.9    | 1.6    | 0.444392114 | 3.9      | 2.525   | 1.375   | 1.544554455 | 0.48    | -1.472 |
| 161808_f_at | 125.6  | 138.3 | 98.5   | 195.1 | 117.2 | 79     | 126.3  | 110.1  | 0.23590023  | 139.375  | 108.15  | 31.225  | 1.288719371 | 0.2233  | -1.269 |
| 161809_r_at | 31.2   | 12.6  | 5.7    | 1.8   | 5.6   | 30.6   | 21.2   | 11.1   | 0.63341568  | 12.825   | 17.125  | 4.3     | 0.748905109 | 0.4523  | 1.767  |
| 161810_r_at | 63.3   | 55.2  | 54.5   | 20.4  | 61.9  | 59.6   | 31.6   | 57.7   | 0.727684771 | 48.35    | 52.7    | 4.35    | 0.917457306 | 0.6695  | 1.147  |
| 161811_f_at | 8.9    | 2.6   | 3.3    | 7.2   | 6.1   | 8.7    | 5.7    | 5      | 0.634661983 | 5.5      | 6.375   | 0.875   | 0.862745098 | 0.4655  | 1.284  |
| 161812_r_at | 229    | 217.4 | 184.1  | 228.8 | 173.6 | 388.9  | 215.7  | 189.7  | 0.627580636 | 214.825  | 241.975 | 27.15   | 0.887798326 | 0.7276  | 1.071  |
| 161813_i_at | 6.9    | 22.2  | 12.3   | 35    | 24.7  | 58.1   | 24.1   | 19     | 0.304240633 | 19.1     | 31.475  | 12.375  | 0.606830818 | 0.2288  | 1.776  |
| 161814_f_at | 292.4  | 336.3 | 246.3  | 367.6 | 371.8 | 306    | 457.5  | 337.9  | 0.220812733 | 310.65   | 368.3   | 57.65   | 0.843469997 | 0.2142  | 1.185  |
| 161815_f_at | 46.3   | 27.3  | 8.7    | 3.1   | 25.1  | 35.6   | 19.3   | 13.3   | 0.864176463 | 21.35    | 23.325  | 1.975   | 0.915326902 | 0.4844  | 1.611  |
| 161816_r_at | 1117.5 | 879.5 | 784.5  | 888.4 | 796.7 | 1388.6 | 856.7  | 927.7  | 0.645233122 | 917.475  | 992.425 | 74.95   | 0.92447792  | 0.6811  | 1.064  |
| 161817_f_at | 901.5  | 915.9 | 1294.5 | 1440  | 791.4 | 552.8  | 1071.4 | 1158.4 | 0.253302383 | 1137.975 | 893.5   | 244.475 | 1.273614997 | 0.2536  | -1.298 |
| 161818_f_at | 251.1  | 287.3 | 239    | 257.3 | 290.5 | 254.1  | 227.3  | 269.1  | 0.928502981 | 258.675  | 260.25  | 1.575   | 0.993948127 | 0.9493  | 1.004  |
| 161819_f_at | 315.8  | 288.6 | 276.9  | 378.5 | 290.5 | 378.9  | 350.8  | 265.1  | 0.86054233  | 314.95   | 321.325 | 6.375   | 0.980160274 | 0.8773  | 1.018  |
| 161820_f_at | 16.4   | 7.1   | 2.1    | 7.4   | 16.8  | 20.6   | 2.8    | 34.3   | 0.215730353 | 8.25     | 18.625  | 10.375  | 0.44295302  | 0.3299  | 2.074  |
| 161821_f_at | 13     | 17.3  | 26.8   | 4.4   | 6.1   | 8.8    | 27     | 8.8    | 0.700971062 | 15.375   | 12.675  | 2.7     | 1.213017751 | 0.7244  | -1.203 |
| 161822_at   | 6.1    | 3.1   | 5.8    | 3.3   | 18.1  | 13.3   | 1.9    | 6.5    | 0.231763177 | 4.575    | 9.95    | 5.375   | 0.459798995 | 0.3563  | 1.697  |
| 161823_r_at | 300.9  | 221.9 | 217.9  | 308.3 | 295.6 | 376.4  | 358.5  | 257.7  | 0.156836535 | 262.25   | 322.05  | 59.8    | 0.814314547 | 0.1584  | 1.23   |
| 161824_r_at | 184.2  | 93.8  | 71.2   | 89.8  | 82.1  | 158.4  | 19.6   | 53.7   | 0.452477633 | 109.75   | 78.45   | 31.3    | 1.398980242 | 0.3216  | -1.686 |
| 161825_f_at | 3.1    | 3.4   | 2.6    | 2.1   | 2.5   | 5      | 1.5    | 2      | 0.954899992 | 2.8      | 2.75    | 0.05    | 1.018181818 | 0.7147  | -1.11  |
| 161826_r_at | 905.6  | 612.8 | 560.7  | 746.5 | 568.7 | 1109.4 | 569.7  | 711.7  | 0.831399703 | 706.4    | 739.875 | 33.475  | 0.954755871 | 0.9031  | 1.024  |
| 161827_f_at | 62.6   | 24.4  | 38     | 37.1  | 40.3  | 56.8   | 41.7   | 31.4   | 0.840441224 | 40.525   | 42.55   | 2.025   | 0.952408931 | 0.7291  | 1.086  |
| 161828_r_at | 10.9   | 5.2   | 2.8    | 9     | 17    | 14.7   | 11.4   | 4.8    | 0.177878365 | 6.975    | 11.975  | 5       | 0.582463466 | 0.2272  | 1.754  |
| 161829_at   | 12.1   | 10.3  | 10     | 15.1  | 11.4  | 18.2   | 11.6   | 12.1   | 0.500104382 | 11.875   | 13.325  | 1.45    | 0.891181989 | 0.4849  | 1.115  |
| 161830_f_at | 39.9   | 30.6  | 20.8   | 13.8  | 25    | 49.9   | 38.4   | 4.4    | 0.79218198  | 26.275   | 29.425  | 3.15    | 0.892948173 | 0.8404  | -1.133 |
| 161831_at   | 59     | 13.4  | 45     | 58.1  | 29.6  | 108.1  | 57.5   | 53.2   | 0.39525219  | 43.875   | 62.1    | 18.225  | 0.706521739 | 0.4113  | 1.477  |



|             |        |        |       |        |        |        |        |        |             |          |          |        |             |         |        |
|-------------|--------|--------|-------|--------|--------|--------|--------|--------|-------------|----------|----------|--------|-------------|---------|--------|
| 161832_r_at | 134.7  | 126.8  | 122.4 | 126.9  | 117.4  | 217    | 118.4  | 169.8  | 0.326111186 | 127.7    | 155.65   | 27.95  | 0.820430453 | 0.3169  | 1.179  |
| 161833_r_at | 7.8    | 35.8   | 28.5  | 17.9   | 6.8    | 34.9   | 21.4   | 6.4    | 0.596089522 | 22.5     | 17.375   | 5.125  | 1.294964029 | 0.5177  | -1.45  |
| 161834_at   | 7      | 11.3   | 3.8   | 3.4    | 4.7    | 4.5    | 2.3    | 3.7    | 0.2572392   | 6.375    | 3.8      | 2.575  | 1.677631579 | 0.2311  | -1.544 |
| 161835_at   | 41.9   | 9.5    | 6.7   | 4.8    | 13.6   | 37.2   | 16.5   | 5.4    | 0.83281539  | 15.725   | 18.175   | 2.45   | 0.86519945  | 0.6293  | 1.37   |
| 161836_r_at | 161.8  | 146.9  | 97.7  | 109.5  | 91.7   | 230.6  | 115.5  | 94.4   | 0.915687449 | 128.975  | 133.05   | 4.075  | 0.969372416 | 0.9243  | -1.025 |
| 161837_r_at | 14.1   | 13.4   | 14.1  | 44.8   | 6.2    | 18.2   | 13.2   | 13.3   | 0.341973583 | 21.6     | 12.725   | 8.875  | 1.697445972 | 0.2723  | -1.57  |
| 161838_f_at | 3.6    | 4.3    | 5.4   | 3.7    | 3.9    | 6.8    | 4.9    | 4.8    | 0.29806082  | 4.25     | 5.1      | 0.85   | 0.833333333 | 0.2789  | 1.19   |
| 161839_f_at | 98     | 86.2   | 89.1  | 79     | 97.3   | 118.7  | 92.7   | 84.5   | 0.276555053 | 88.075   | 98.3     | 10.225 | 0.895981689 | 0.2601  | 1.11   |
| 161840_f_at | 3.4    | 4.6    | 6.3   | 6.9    | 9      | 1.5    | 3.2    | 18.6   | 0.5282941   | 5.3      | 8.075    | 2.775  | 0.656346749 | 0.9486  | 1.04   |
| 161841_r_at | 168.3  | 101.7  | 41    | 156.2  | 119.7  | 207.7  | 85.1   | 104.7  | 0.763959936 | 116.8    | 129.3    | 12.5   | 0.903325599 | 0.6571  | 1.192  |
| 161842_r_at | 439.6  | 374.1  | 348.8 | 338.4  | 312    | 552.7  | 352.6  | 376.5  | 0.707923785 | 375.225  | 398.45   | 23.225 | 0.941711633 | 0.7729  | 1.042  |
| 161843_at   | 59.7   | 11.6   | 5.4   | 5.1    | 5.3    | 14.9   | 5.8    | 4.4    | 0.403990298 | 20.45    | 7.6      | 12.85  | 2.690789474 | 0.411   | -1.755 |
| 161844_at   | 52.6   | 26.5   | 31.2  | 9.8    | 28.9   | 62.7   | 41.3   | 18.5   | 0.568303116 | 30.025   | 37.85    | 7.825  | 0.79326288  | 0.5254  | 1.342  |
| 161845_at   | 95.6   | 53.2   | 87.2  | 26.7   | 97.1   | 172.5  | 13.5   | 42.7   | 0.701296655 | 65.675   | 81.45    | 15.775 | 0.806322897 | 0.9366  | -1.053 |
| 161846_r_at | 120.8  | 86.1   | 75.8  | 95.1   | 72.5   | 154.2  | 80.2   | 102.4  | 0.721846586 | 94.45    | 102.325  | 7.875  | 0.923039335 | 0.8032  | 1.052  |
| 161847_r_at | 208.4  | 127.9  | 255.2 | 197.5  | 254.8  | 249    | 184    | 146.2  | 0.772220189 | 197.25   | 208.5    | 11.25  | 0.946043165 | 0.7713  | 1.062  |
| 161848_r_at | 1.1    | 4.4    | 3.4   | 0.9    | 2.8    | 7.8    | 0.6    | 3.4    | 0.521999749 | 2.45     | 3.65     | 1.2    | 0.671232877 | 0.722   | 1.29   |
| 161849_r_at | 13.8   | 6.5    | 9.2   | 7.1    | 5.2    | 9.2    | 7.2    | 7.8    | 0.381013572 | 9.15     | 7.35     | 1.8    | 1.244897959 | 0.3855  | -1.215 |
| 161850_at   | 4.3    | 9.4    | 1.4   | 2.7    | 3      | 1.8    | 1.9    | 2.8    | 0.323566076 | 4.45     | 2.375    | 2.075  | 1.873684211 | 0.3555  | -1.519 |
| 161851_r_at | 68.1   | 116.4  | 59.3  | 48.1   | 66.4   | 122.5  | 56.5   | 54.2   | 0.933204339 | 72.975   | 74.9     | 1.925  | 0.974299065 | 0.9314  | 1.024  |
| 161852_i_at | 25.7   | 6.1    | 17.8  | 3.2    | 16     | 13.2   | 12.9   | 16.3   | 0.808000389 | 13.2     | 14.6     | 1.4    | 0.904109589 | 0.4358  | 1.501  |
| 161853_f_at | 23     | 10.2   | 42.1  | 58     | 79.2   | 69.9   | 37.1   | 50.7   | 0.117447843 | 33.325   | 59.225   | 25.9   | 0.562684677 | 0.1342  | 2.067  |
| 161854_f_at | 30.3   | 5.1    | 15.9  | 21.4   | 5.6    | 48     | 6      | 31.5   | 0.710610174 | 18.175   | 22.775   | 4.6    | 0.798024149 | 0.9921  | 1.007  |
| 161855_at   | 27.7   | 2.1    | 6.9   | 5.8    | 13     | 28.3   | 9.8    | 8.8    | 0.576610658 | 10.625   | 14.975   | 4.35   | 0.70951586  | 0.31    | 1.934  |
| 161856_f_at | 1578.6 | 1640.7 | 1301  | 1423.4 | 1743.3 | 1344.6 | 1535.4 | 1357.4 | 0.941607276 | 1485.925 | 1495.175 | 9.25   | 0.993813433 | 0.9564  | 1.005  |
| 161857_r_at | 60     | 60.7   | 87.8  | 75.5   | 46.7   | 119.1  | 39.7   | 109.3  | 0.742266637 | 71       | 78.7     | 7.7    | 0.902160102 | 0.9981  | 1.001  |
| 161858_f_at | 37.7   | 37.7   | 43.2  | 42.3   | 53.3   | 34     | 23.5   | 49.1   | 0.973708854 | 40.225   | 39.975   | 0.25   | 1.006253909 | 0.7846  | -1.056 |
| 161859_f_at | 216    | 126.2  | 135   | 165.1  | 164.9  | 210.6  | 182.4  | 178.4  | 0.35016575  | 160.575  | 184.075  | 23.5   | 0.872334646 | 0.2807  | 1.168  |
| 161860_f_at | 202.9  | 325.9  | 260   | 312.3  | 439.3  | 319.2  | 300.5  | 259    | 0.3036026   | 275.275  | 329.5    | 54.225 | 0.835432473 | 0.2963  | 1.194  |
| 161861_i_at | 3      | 10.2   | 2.5   | 2.3    | 2.3    | 35.5   | 1.1    | 4.7    | 0.499046012 | 4.5      | 10.9     | 6.4    | 0.412844037 | 0.8091  | 1.233  |
| 161862_i_at | 15.9   | 57.5   | 24.5  | 30.1   | 36     | 44.3   | 25.1   | 52.2   | 0.519145547 | 32       | 39.4     | 7.4    | 0.812182741 | 0.3984  | 1.326  |
| 161863_r_at | 1.1    | 4.9    | 3     | 0.2    | 0.2    | 0.7    | 0.4    | 0.3    | 0.166258466 | 2.3      | 0.4      | 1.9    | 5.75        | 0.1333  | -3.56  |
| 161864_f_at | 401.2  | 338.8  | 305.5 | 401.4  | 337.8  | 418.2  | 330    | 407.6  | 0.73637042  | 361.725  | 373.4    | 11.675 | 0.968733262 | 0.7315  | 1.033  |
| 161865_r_at | 9.6    | 7.5    | 6.3   | 12.1   | 9.5    | 36.2   | 9.1    | 6.8    | 0.420476682 | 8.875    | 15.4     | 6.525  | 0.576298701 | 0.4236  | 1.409  |
| 161866_at   | 12.1   | 13.4   | 10.4  | 11.3   | 9.2    | 26.4   | 66.3   | 14.6   | 0.271940846 | 11.8     | 29.125   | 17.325 | 0.405150215 | 0.1911  | 1.881  |
| 161867_f_at | 4.9    | 6      | 2.7   | 4      | 2.5    | 4.1    | 4.2    | 8.1    | 0.823494318 | 4.4      | 4.725    | 0.325  | 0.931216931 | 0.9179  | 1.032  |
| 161868_r_at | 12.1   | 10.9   | 6.8   | 19.7   | 11.4   | 5.3    | 4.3    | 13.9   | 0.345768289 | 12.375   | 8.725    | 3.65   | 1.418338109 | 0.3159  | -1.484 |
| 161869_i_at | 37.8   | 25.9   | 28.3  | 32.5   | 27.6   | 36.9   | 14.2   | 30.6   | 0.519047942 | 31.125   | 27.325   | 3.8    | 1.139066789 | 0.4578  | -1.194 |
| 161870_at   | 175.3  | 127.8  | 118   | 110.8  | 91.8   | 200.5  | 130    | 121.8  | 0.915063205 | 132.975  | 136.025  | 3.05   | 0.977577651 | 0.9943  | 1.001  |
| 161871_f_at | 22.1   | 36.8   | 55.6  | 29.5   | 14.2   | 20.2   | 52.5   | 22.7   | 0.471565826 | 36       | 27.4     | 8.6    | 1.313868613 | 0.3523  | -1.407 |
| 161872_f_at | 246.6  | 356.7  | 405.2 | 320.1  | 560.6  | 283.9  | 441.7  | 404.3  | 0.230946663 | 332.15   | 422.625  | 90.475 | 0.785921325 | 0.2429  | 1.256  |
| 161873_r_at | 30.9   | 6.2    | 4.3   | 8.1    | 42.5   | 64.1   | 4.7    | 5.4    | 0.34902477  | 12.375   | 29.175   | 16.8   | 0.424164524 | 0.4928  | 1.799  |
| 161874_r_at | 154.8  | 170.6  | 84    | 74.7   | 85.9   | 129.5  | 234.5  | 288.7  | 0.285959547 | 121.025  | 184.65   | 63.625 | 0.65542919  | 0.3182  | 1.46   |
| 161875_at   | 6      | 12.3   | 1.5   | 3.1    | 2.1    | 5.1    | 2.4    | 3.6    | 0.390488006 | 5.725    | 3.3      | 2.425  | 1.734848485 | 0.5329  | -1.386 |
| 161876_r_at | 5.5    | 6      | 7     | 2.7    | 9.8    | 19.9   | 0.8    | 1.3    | 0.600534401 | 5.3      | 7.95     | 2.65   | 0.666666667 | 0.7378  | -1.328 |
| 161877_f_at | 622.3  | 347.4  | 493.1 | 519.6  | 482.9  | 764.6  | 446.9  | 594.7  | 0.434271322 | 495.6    | 572.275  | 76.675 | 0.866017212 | 0.4358  | 1.154  |
| 161878_r_at | 28.8   | 25.6   | 18.5  | 21.8   | 16.3   | 29.3   | 9      | 25.4   | 0.506897198 | 23.675   | 20       | 3.675  | 1.18375     | 0.41    | -1.285 |
| 161879_r_at | 458.1  | 389.2  | 397.1 | 475    | 464.6  | 784.4  | 387.8  | 417.2  | 0.433864146 | 429.85   | 513.5    | 83.65  | 0.837098345 | 0.433   | 1.151  |
| 161880_r_at | 19.3   | 3.2    | 7.2   | 4.2    | 11.7   | 13.1   | 4.6    | 10     | 0.755404744 | 8.475    | 9.85     | 1.375  | 0.860406091 | 0.4924  | 1.401  |
| 161881_f_at | 246.7  | 216.2  | 291.3 | 201.2  | 310.8  | 250.6  | 251.8  | 232.5  | 0.422462087 | 238.85   | 261.425  | 22.575 | 0.913646361 | 0.3925  | 1.099  |
| 161882_f_at | 65.7   | 111.9  | 89.1  | 97.8   | 73.3   | 91     | 109.9  | 113    | 0.686171309 | 91.125   | 96.8     | 5.675  | 0.941373967 | 0.684   | 1.067  |
| 161883_f_at | 102.9  | 102.7  | 88.5  | 120    | 132.3  | 168.9  | 123.5  | 124.8  | 0.042790557 | 103.525  | 137.375  | 33.85  | 0.753594177 | 0.02665 | 1.324  |
| 161884_r_at | 64.1   | 51.2   | 38.6  | 60.6   | 29.1   | 100.1  | 47.7   | 35.5   | 0.977092398 | 53.625   | 53.1     | 0.525  | 1.009887006 | 0.7188  | -1.117 |
| 161885_f_at | 74.2   | 54.6   | 63.8  | 48.4   | 39     | 72.1   | 53.3   | 58.1   | 0.620466457 | 60.25    | 55.625   | 4.625  | 1.083146067 | 0.5884  | -1.094 |
| 161886_at   | 6.4    | 3.8    | 3.5   | 4.4    | 12.2   | 5.2    | 4.4    | 3.9    | 0.41089806  | 4.525    | 6.425    | 1.9    | 0.704280156 | 0.3829  | 1.316  |
| 161887_r_at | 97.7   | 34.2   | 34.9  | 46.7   | 45.1   | 67.4   | 34.5   | 46.5   | 0.776934611 | 53.375   | 48.375   | 5      | 1.103359173 | 0.9235  | 1.029  |



|             |        |        |        |        |        |        |        |        |             |          |          |         |             |         |        |
|-------------|--------|--------|--------|--------|--------|--------|--------|--------|-------------|----------|----------|---------|-------------|---------|--------|
| 161888_r_at | 375.5  | 251    | 320.7  | 322    | 305.3  | 450.7  | 290.4  | 306.7  | 0.663123082 | 317.3    | 338.275  | 20.975  | 0.937994235 | 0.6766  | 1.059  |
| 161889_f_at | 3349.9 | 3238.3 | 2976.4 | 2851.8 | 3568.2 | 3228   | 3173.5 | 3057.9 | 0.373235307 | 3104.1   | 3256.9   | 152.8   | 0.953084221 | 0.3665  | 1.05   |
| 161890_f_at | 8.2    | 7.5    | 1.7    | 35.6   | 13.2   | 16.5   | 7.1    | 30.7   | 0.70596121  | 13.25    | 16.875   | 3.625   | 0.785185185 | 0.3952  | 1.878  |
| 161891_r_at | 166.2  | 68.1   | 100.2  | 111.6  | 116.3  | 229.4  | 122.6  | 102.5  | 0.419064049 | 111.525  | 142.7    | 31.175  | 0.781534688 | 0.3799  | 1.276  |
| 161892_r_at | 4.5    | 3      | 1.1    | 0.6    | 0.8    | 12.3   | 1.8    | 0.7    | 0.619410841 | 2.3      | 3.9      | 1.6     | 0.58974359  | 0.9096  | 1.101  |
| 161893_i_at | 49.3   | 21     | 39     | 47.9   | 46.9   | 95     | 25.6   | 37     | 0.514834956 | 39.3     | 51.125   | 11.825  | 0.768704156 | 0.5869  | 1.216  |
| 161894_r_at | 122.1  | 95.7   | 117    | 169.2  | 136.8  | 205.3  | 125.4  | 159.4  | 0.239652038 | 126      | 156.725  | 30.725  | 0.803955974 | 0.2157  | 1.248  |
| 161895_s_at | 437.2  | 324.1  | 446    | 511.4  | 438.4  | 460.5  | 421.6  | 451.1  | 0.759730311 | 429.675  | 442.9    | 13.225  | 0.970139986 | 0.6756  | 1.044  |
| 161896_at   | 16.6   | 16.9   | 15.2   | 12.4   | 12.4   | 22     | 10.2   | 15.4   | 0.925584763 | 15.275   | 15       | 0.275   | 1.018333333 | 0.7809  | -1.054 |
| 161897_f_at | 105.6  | 91.5   | 95.7   | 100.3  | 79.4   | 145.3  | 94.4   | 122    | 0.476434593 | 98.275   | 110.275  | 12      | 0.891181138 | 0.5358  | 1.094  |
| 161898_i_at | 582.1  | 327.5  | 404.7  | 509.2  | 313.1  | 503.3  | 547.4  | 460    | 0.999242675 | 455.875  | 455.95   | 0.075   | 0.999835508 | 0.9893  | -1.002 |
| 161899_f_at | 48.8   | 32.4   | 20.7   | 41.4   | 29.2   | 45.1   | 33.9   | 23.9   | 0.724556602 | 35.825   | 33.025   | 2.8     | 1.084784254 | 0.8038  | -1.061 |
| 161900_f_at | 29.7   | 20.6   | 20.2   | 21.1   | 24.5   | 25.1   | 14.6   | 29.7   | 0.888330655 | 22.9     | 23.475   | 0.575   | 0.975505857 | 0.9804  | 1.005  |
| 161901_r_at | 49.2   | 18.9   | 19     | 21.4   | 30.6   | 56.8   | 30.5   | 36.2   | 0.28390502  | 27.125   | 38.525   | 11.4    | 0.704088254 | 0.1862  | 1.502  |
| 161902_f_at | 107.2  | 78.5   | 80.9   | 118.3  | 82.5   | 134.3  | 94.4   | 81.4   | 0.907325613 | 96.225   | 98.15    | 1.925   | 0.980387163 | 0.9294  | 1.014  |
| 161903_f_at | 2.1    | 22.5   | 18.2   | 23.8   | 18.9   | 33.5   | 11.1   | 5.3    | 0.946770869 | 16.65    | 17.2     | 0.55    | 0.968023256 | 0.8393  | 1.161  |
| 161904_f_at | 1.5    | 0.6    | 0.9    | 16.3   | 0.5    | 2.4    | 7.6    | 1.7    | 0.690146667 | 4.825    | 3.05     | 1.775   | 1.581967213 | 0.9457  | 1.067  |
| 161905_r_at | 20     | 11.7   | 1.6    | 2.4    | 13.5   | 13.9   | 17.7   | 17.6   | 0.219241004 | 8.925    | 15.675   | 6.75    | 0.56937799  | 0.1407  | 2.827  |
| 161906_f_at | 203.9  | 142.6  | 124.6  | 178.5  | 247.7  | 249    | 161.6  | 280.5  | 0.064258012 | 162.4    | 234.7    | 72.3    | 0.691947167 | 0.0671  | 1.442  |
| 161907_s_at | 105.9  | 129    | 106    | 184.2  | 116.3  | 97.3   | 211.7  | 200.6  | 0.496200887 | 131.275  | 156.475  | 25.2    | 0.838951909 | 0.5527  | 1.159  |
| 161908_i_at | 6.2    | 2.4    | 23.6   | 33.7   | 32.2   | 48.6   | 36.8   | 23.6   | 0.087159051 | 16.475   | 35.3     | 18.825  | 0.466713881 | 0.1084  | 3.292  |
| 161909_r_at | 26.1   | 14.2   | 11.8   | 24.2   | 17.4   | 96.7   | 9.7    | 13.4   | 0.521195587 | 19.075   | 34.3     | 15.225  | 0.556122449 | 0.7504  | 1.201  |
| 161910_at   | 26.5   | 11.3   | 7.4    | 36     | 6.9    | 12.4   | 6.5    | 27.7   | 0.438808983 | 20.3     | 13.375   | 6.925   | 1.517757009 | 0.4379  | -1.512 |
| 161911_f_at | 189.9  | 195.6  | 147.1  | 155.2  | 208.3  | 182.9  | 183.4  | 180.7  | 0.280841526 | 171.95   | 188.825  | 16.875  | 0.910631537 | 0.2536  | 1.105  |
| 161912_r_at | 216.3  | 115    | 136.2  | 204    | 104.7  | 306    | 174.7  | 167.5  | 0.696095626 | 167.875  | 188.225  | 20.35   | 0.891884712 | 0.7862  | 1.079  |
| 161913_r_at | 3841.7 | 4235.2 | 3432.6 | 3786.2 | 3151.2 | 3817.6 | 3317   | 4149.2 | 0.477193975 | 3823.925 | 3608.75  | 215.175 | 1.059625909 | 0.4541  | -1.063 |
| 161914_s_at | 2498.7 | 2934.5 | 2305.7 | 2288.7 | 2305.5 | 2358.4 | 2474.3 | 2651.3 | 0.740203057 | 2506.9   | 2447.375 | 59.525  | 1.024321978 | 0.7664  | -1.021 |
| 161915_f_at | 29.5   | 58.6   | 45.7   | 95.1   | 81.9   | 35.4   | 32.4   | 80.6   | 0.986295361 | 57.225   | 57.575   | 0.35    | 0.993920973 | 0.9965  | 1.002  |
| 161916_r_at | 331.6  | 282.2  | 249.1  | 242.7  | 233.6  | 423.6  | 208.8  | 237.6  | 0.993012173 | 276.4    | 275.9    | 0.5     | 1.001812251 | 0.8453  | 1.036  |
| 161917_i_at | 1530.3 | 782.5  | 725.3  | 464.9  | 689.6  | 787.6  | 405.5  | 400    | 0.28702021  | 875.75   | 570.675  | 305.075 | 1.534586236 | 0.2553  | -1.463 |
| 161918_at   | 102.3  | 92.2   | 66.1   | 78.6   | 75.6   | 151.1  | 75.1   | 89     | 0.548222335 | 84.8     | 97.7     | 12.9    | 0.867963153 | 0.5811  | 1.117  |
| 161919_r_at | 11.3   | 7.7    | 6.6    | 5.8    | 4.2    | 10.6   | 5.5    | 5.3    | 0.469434104 | 7.85     | 6.4      | 1.45    | 1.2265625   | 0.3782  | -1.265 |
| 161920_r_at | 275.7  | 233.6  | 279.8  | 281.2  | 264.4  | 355.6  | 262    | 291.2  | 0.348134545 | 267.575  | 293.3    | 25.725  | 0.912291169 | 0.3391  | 1.091  |
| 161921_f_at | 25.3   | 28.3   | 24.9   | 30.1   | 10.9   | 38.3   | 35     | 33.5   | 0.743322111 | 27.15    | 29.425   | 2.275   | 0.922684792 | 0.9409  | -1.023 |
| 161922_r_at | 19.2   | 8.9    | 4.4    | 7.1    | 7.4    | 13     | 7.1    | 14.5   | 0.879414846 | 9.9      | 10.5     | 0.6     | 0.942857143 | 0.6857  | 1.164  |
| 161923_at   | 39.3   | 50.8   | 31     | 37.2   | 33.1   | 32.3   | 40.4   | 37.4   | 0.451241655 | 39.575   | 35.8     | 3.775   | 1.105446927 | 0.469   | -1.093 |
| 161924_f_at | 20     | 28.7   | 27.8   | 13.2   | 14.1   | 19.8   | 15.8   | 15.7   | 0.1953458   | 22.425   | 16.35    | 6.075   | 1.371559633 | 0.2045  | -1.32  |
| 161925_at   | 18.7   | 13.5   | 7.9    | 13.1   | 6.3    | 18.6   | 5.9    | 31.8   | 0.737910916 | 13.3     | 15.65    | 2.35    | 0.849840256 | 0.935   | -1.039 |
| 161926_r_at | 606.8  | 1042.3 | 1002.5 | 893.8  | 1002   | 534.3  | 1020.2 | 805    | 0.769531088 | 886.35   | 840.375  | 45.975  | 1.05470772  | 0.7554  | -1.066 |
| 161927_at   | 42.7   | 30.5   | 21.5   | 28.9   | 36.4   | 33.4   | 10.9   | 46.6   | 0.919732339 | 30.9     | 31.825   | 0.925   | 0.9709348   | 0.8546  | -1.07  |
| 161928_at   | 140.7  | 110.1  | 99     | 95.7   | 96     | 148.7  | 93.7   | 124.1  | 0.806519692 | 111.375  | 115.625  | 4.25    | 0.963243243 | 0.8325  | 1.032  |
| 161929_at   | 91.1   | 36.3   | 28.1   | 41.4   | 21.1   | 93.2   | 41.3   | 58.6   | 0.842745014 | 49.225   | 53.55    | 4.325   | 0.91923436  | 0.8978  | 1.055  |
| 161930_r_at | 35.3   | 23.1   | 19.9   | 27.5   | 29.9   | 58.2   | 21     | 33.3   | 0.348885841 | 26.45    | 35.6     | 9.15    | 0.742977528 | 0.3482  | 1.283  |
| 161931_r_at | 134.3  | 67.4   | 70.3   | 80     | 78.2   | 186.5  | 67.4   | 90.6   | 0.600286605 | 88       | 105.675  | 17.675  | 0.832741897 | 0.6306  | 1.15   |
| 161932_r_at | 10.8   | 4.9    | 7.2    | 2.9    | 6.4    | 10.1   | 7.7    | 9.8    | 0.337259313 | 6.45     | 8.5      | 2.05    | 0.758823529 | 0.2609  | 1.452  |
| 161933_r_at | 190.9  | 146    | 137.3  | 142.7  | 168.2  | 183.8  | 153.9  | 161.2  | 0.412569253 | 154.225  | 166.775  | 12.55   | 0.924748913 | 0.3515  | 1.089  |
| 161934_f_at | 121    | 79.8   | 80.6   | 109.2  | 76.2   | 160.4  | 65.3   | 94.5   | 0.953904998 | 97.65    | 99.1     | 1.45    | 0.985368315 | 0.8982  | -1.03  |
| 161935_r_at | 39.2   | 37.4   | 26.5   | 33.6   | 36.8   | 26.4   | 8.8    | 101.7  | 0.680831491 | 34.175   | 43.425   | 9.25    | 0.786989062 | 0.8489  | -1.107 |
| 161936_at   | 21.6   | 23.7   | 16     | 16.2   | 10.9   | 22.1   | 14.8   | 41     | 0.708315332 | 19.375   | 22.2     | 2.825   | 0.872747748 | 0.9356  | 1.026  |
| 161937_r_at | 18.5   | 13.4   | 81.9   | 52.3   | 43.6   | 124.3  | 31.6   | 11.1   | 0.721317236 | 41.525   | 52.65    | 11.125  | 0.788698955 | 0.8331  | 1.155  |
| 161938_r_at | 16     | 13.3   | 6.3    | 9.3    | 4.9    | 17.9   | 9      | 8      | 0.73022844  | 11.225   | 9.95     | 1.275   | 1.128140704 | 0.6375  | -1.181 |
| 161939_f_at | 89.5   | 39     | 14.4   | 111.1  | 60.3   | 169.3  | 89.5   | 77.1   | 0.321216321 | 63.5     | 99.05    | 35.55   | 0.641090358 | 0.264   | 1.882  |
| 161940_r_at | 0.6    | 0.6    | 2      | 1.1    | 1.4    | 11     | 7.5    | 3.8    | 0.103281697 | 1.075    | 5.925    | 4.85    | 0.181434599 | 0.02681 | 4.909  |
| 161941_r_at | 632.7  | 710.3  | 685.2  | 845.7  | 660    | 934.4  | 700.5  | 777.5  | 0.538125333 | 718.475  | 768.1    | 49.625  | 0.935392527 | 0.5394  | 1.066  |
| 161942_f_at | 57     | 51.5   | 69.9   | 75.1   | 69.3   | 62.1   | 38.9   | 35     | 0.284541929 | 63.375   | 51.325   | 12.05   | 1.234778373 | 0.2509  | -1.273 |
| 161943_at   | 62.4   | 68.9   | 38.2   | 65.6   | 47.2   | 112    | 47.9   | 66.3   | 0.596371077 | 58.775   | 68.35    | 9.575   | 0.859912217 | 0.6656  | 1.117  |



|             |        |        |        |        |        |        |        |        |             |          |          |         |             |         |        |
|-------------|--------|--------|--------|--------|--------|--------|--------|--------|-------------|----------|----------|---------|-------------|---------|--------|
| 161944_at   | 8.6    | 17.9   | 16.2   | 13.5   | 9      | 24.1   | 26.8   | 19.3   | 0.255367401 | 14.05    | 19.8     | 5.75    | 0.70959596  | 0.3431  | 1.354  |
| 161945_at   | 5.3    | 10     | 3.8    | 3.8    | 3.5    | 6.7    | 3.5    | 21.1   | 0.543016512 | 5.725    | 8.7      | 2.975   | 0.658045977 | 0.6843  | 1.229  |
| 161946_r_at | 108.5  | 52.5   | 74.3   | 84.6   | 62.1   | 114.3  | 99.5   | 96     | 0.448311249 | 79.975   | 92.975   | 13      | 0.860177467 | 0.4561  | 1.173  |
| 161947_f_at | 201.1  | 200.9  | 162.6  | 175    | 189.2  | 242.7  | 148    | 131.7  | 0.805540418 | 184.9    | 177.9    | 7       | 1.039347948 | 0.6829  | -1.064 |
| 161948_f_at | 53.5   | 52.1   | 53.2   | 73.4   | 50.3   | 43.4   | 44.3   | 78.8   | 0.710408161 | 58.05    | 54.2     | 3.85    | 1.07103321  | 0.6009  | -1.093 |
| 161949_at   | 43.7   | 154.2  | 29.5   | 190.1  | 136.6  | 34.6   | 28.5   | 201.2  | 0.945099384 | 104.375  | 100.225  | 4.15    | 1.041406835 | 0.9048  | -1.087 |
| 161950_at   | 4.1    | 4.2    | 2.2    | 3.8    | 3.6    | 27.1   | 13.8   | 3.8    | 0.222872842 | 3.575    | 12.075   | 8.5     | 0.296066253 | 0.1336  | 2.461  |
| 161951_f_at | 240.5  | 247.1  | 282.4  | 240.3  | 279.4  | 279.2  | 273.8  | 233.2  | 0.393080943 | 252.575  | 266.4    | 13.825  | 0.948104354 | 0.4004  | 1.054  |
| 161952_r_at | 0.8    | 0.6    | 0.1    | 2.6    | 0.4    | 5.3    | 0.8    | 8.9    | 0.258438798 | 1.025    | 3.85     | 2.825   | 0.266233766 | 0.2647  | 3.301  |
| 161953_at   | 28.2   | 11.7   | 13.9   | 15     | 19     | 26.7   | 21.7   | 10.1   | 0.684753056 | 17.2     | 19.375   | 2.175   | 0.887741935 | 0.6858  | 1.128  |
| 161954_r_at | 28.6   | 6.5    | 7.5    | 30.3   | 5.3    | 7.7    | 6.7    | 4.2    | 0.155193039 | 18.225   | 5.975    | 12.25   | 3.050209205 | 0.08639 | -2.458 |
| 161955_f_at | 60.2   | 35.9   | 40.7   | 47.7   | 55.3   | 78.1   | 56.8   | 40.8   | 0.264515871 | 46.125   | 57.75    | 11.625  | 0.798701299 | 0.2562  | 1.243  |
| 161956_at   | 88.2   | 65.2   | 45.6   | 59.5   | 50.1   | 132.1  | 54.3   | 32.8   | 0.915225303 | 64.625   | 67.325   | 2.7     | 0.959896027 | 0.8343  | -1.073 |
| 161957_r_at | 3.6    | 0.8    | 0.6    | 0.8    | 1      | 11     | 1      | 3.6    | 0.343067578 | 1.45     | 4.15     | 2.7     | 0.34939759  | 0.2997  | 2.241  |
| 161958_at   | 8.6    | 11.6   | 3.1    | 2.2    | 1.8    | 2.4    | 1.4    | 7.1    | 0.275449961 | 6.375    | 3.175    | 3.2     | 2.007874016 | 0.2463  | -2.001 |
| 161959_f_at | 1.4    | 1      | 2.3    | 0.7    | 7.3    | 0.5    | 7.6    | 1.5    | 0.222880114 | 1.35     | 4.225    | 2.875   | 0.319526627 | 0.3427  | 2.081  |
| 161960_f_at | 206.9  | 244.3  | 296.7  | 350.7  | 229.8  | 304.6  | 313.1  | 304.8  | 0.730929393 | 274.65   | 288.075  | 13.425  | 0.953397553 | 0.676   | 1.062  |
| 161961_at   | 42.8   | 38.9   | 46.8   | 148.6  | 105.2  | 162.2  | 167.5  | 146.9  | 0.05646957  | 69.275   | 145.45   | 76.175  | 0.476280509 | 0.03519 | 2.454  |
| 161962_f_at | 3171.4 | 3615.2 | 3333.6 | 2859.7 | 4040.9 | 4389.1 | 3293   | 2514   | 0.52104025  | 3244.975 | 3559.25  | 314.275 | 0.911701903 | 0.6004  | 1.077  |
| 161963_f_at | 31.1   | 40.9   | 36.1   | 37.2   | 63.7   | 62.3   | 56.8   | 18.8   | 0.278977062 | 36.325   | 50.4     | 14.075  | 0.720734127 | 0.4782  | 1.255  |
| 161964_r_at | 224.2  | 184.5  | 298    | 255.9  | 213.7  | 489.8  | 207.7  | 244.2  | 0.540123939 | 240.65   | 288.85   | 48.2    | 0.833131383 | 0.5853  | 1.139  |
| 161965_r_at | 260.5  | 328.9  | 249    | 211.4  | 268.4  | 406.8  | 204.5  | 311.7  | 0.503944566 | 262.45   | 297.85   | 35.4    | 0.881148229 | 0.547   | 1.115  |
| 161966_f_at | 258.9  | 192.5  | 227.1  | 234.5  | 153    | 279    | 292.1  | 183.2  | 0.971303332 | 228.25   | 226.825  | 1.425   | 1.006282376 | 0.8329  | -1.038 |
| 161967_at   | 267    | 187.8  | 262.3  | 332.1  | 177.2  | 469.4  | 246.1  | 63.4   | 0.810639452 | 262.3    | 239.025  | 23.275  | 1.097374752 | 0.5108  | -1.354 |
| 161968_f_at | 3.7    | 3.8    | 1.2    | 1.8    | 9.2    | 3.8    | 2.1    | 1.7    | 0.444144127 | 2.625    | 4.2      | 1.575   | 0.625       | 0.4711  | 1.437  |
| 161969_f_at | 79.1   | 61.7   | 98.8   | 66.7   | 20.7   | 20.4   | 14.7   | 62     | 0.015506597 | 76.575   | 29.45    | 47.125  | 2.600169779 | 0.01557 | -3.025 |
| 161970_f_at | 139.4  | 143.4  | 147.4  | 202.3  | 152.8  | 169.7  | 153.3  | 199.9  | 0.581903794 | 158.125  | 168.925  | 10.8    | 0.936066302 | 0.5285  | 1.074  |
| 161971_r_at | 34     | 8.2    | 11.7   | 16.4   | 8.9    | 21.6   | 3.4    | 11.8   | 0.410674708 | 17.575   | 11.425   | 6.15    | 1.538293217 | 0.3593  | -1.623 |
| 161972_r_at | 1.9    | 1      | 0.5    | 0.5    | 0.6    | 1.1    | 0.9    | 1.5    | 0.900745838 | 0.975    | 1.025    | 0.05    | 0.951219512 | 0.6705  | 1.173  |
| 161973_r_at | 115.1  | 30.9   | 67.7   | 26.9   | 73.1   | 72.5   | 114.4  | 14.7   | 0.778517663 | 60.15    | 68.675   | 8.525   | 0.87586458  | 0.8914  | 1.084  |
| 161974_r_at | 41.6   | 32.2   | 36.8   | 34     | 31.6   | 61     | 34.3   | 67.1   | 0.268836373 | 36.15    | 48.5     | 12.35   | 0.745360825 | 0.2708  | 1.276  |
| 161975_r_at | 41.6   | 14.8   | 10     | 17     | 23.7   | 55     | 31.3   | 22.3   | 0.282784551 | 20.85    | 33.075   | 12.225  | 0.630385488 | 0.189   | 1.719  |
| 161976_r_at | 4.9    | 1.8    | 0.9    | 1.1    | 0.7    | 10.6   | 2.5    | 1.6    | 0.533852876 | 2.175    | 3.85     | 1.675   | 0.564935065 | 0.7027  | 1.315  |
| 161977_r_at | 24.3   | 14.8   | 3.4    | 12.5   | 10.5   | 18.4   | 16.8   | 15.9   | 0.739411083 | 13.75    | 15.4     | 1.65    | 0.892857143 | 0.5117  | 1.357  |
| 161978_r_at | 7.7    | 2.7    | 1.1    | 2.2    | 1.7    | 2      | 1.1    | 2.8    | 0.378647845 | 3.425    | 1.9      | 1.525   | 1.802631579 | 0.4333  | -1.455 |
| 161979_f_at | 1.6    | 2.2    | 9.1    | 8.4    | 14.9   | 7.6    | 5.3    | 9.3    | 0.215369429 | 5.325    | 9.275    | 3.95    | 0.574123989 | 0.1808  | 2.125  |
| 161980_f_at | 88.2   | 182.5  | 168    | 290.1  | 176.3  | 65.3   | 217.1  | 180.1  | 0.686185353 | 182.2    | 159.7    | 22.5    | 1.140889167 | 0.717   | -1.149 |
| 161981_r_at | 7.4    | 0.8    | 0.5    | 6.8    | 5.3    | 11.6   | 4.8    | 1.1    | 0.54870301  | 3.875    | 5.7      | 1.825   | 0.679824561 | 0.4482  | 2.009  |
| 161982_at   | 25.7   | 28.5   | 9.2    | 19.6   | 16.9   | 23.2   | 1.4    | 13.4   | 0.305285819 | 20.75    | 13.725   | 7.025   | 1.511839709 | 0.3353  | -2.072 |
| 161983_f_at | 330.4  | 295.7  | 199.1  | 208.2  | 321.8  | 335.9  | 239.3  | 266.4  | 0.447023747 | 258.35   | 290.85   | 32.5    | 0.888258553 | 0.4079  | 1.142  |
| 161984_f_at | 918.6  | 1109.6 | 913.2  | 1571.3 | 964.5  | 1077.3 | 1524.4 | 1644.3 | 0.47132298  | 1128.175 | 1302.625 | 174.45  | 0.866078112 | 0.4582  | 1.155  |
| 161985_f_at | 23.2   | 28.2   | 14.6   | 2.5    | 22.8   | 13.4   | 9.7    | 7.3    | 0.586373975 | 17.125   | 13.3     | 3.825   | 1.287593985 | 0.9644  | 1.028  |
| 161986_f_at | 11.5   | 15.8   | 21.1   | 42     | 37.1   | 37.3   | 7.7    | 37     | 0.499850971 | 22.6     | 29.775   | 7.175   | 0.759026029 | 0.6584  | 1.251  |
| 161987_at   | 313.8  | 215.5  | 224.6  | 205.7  | 239.2  | 364    | 217.9  | 262.3  | 0.47903996  | 239.9    | 270.85   | 30.95   | 0.885730109 | 0.46    | 1.123  |
| 161988_f_at | 69.6   | 83.3   | 74.7   | 91.2   | 114.5  | 102.9  | 92.4   | 91.9   | 0.027786884 | 79.7     | 100.425  | 20.725  | 0.793627085 | 0.02595 | 1.261  |
| 161989_f_at | 19.3   | 16.8   | 12.2   | 16.3   | 15     | 17.1   | 22     | 11.5   | 0.928135491 | 16.15    | 16.4     | 0.25    | 0.984756098 | 0.9899  | 1.002  |
| 161990_f_at | 582.1  | 485.5  | 452.6  | 441.2  | 454.8  | 606.1  | 422.3  | 475    | 0.988131619 | 490.35   | 489.55   | 0.8     | 1.001634154 | 0.961   | 1.005  |
| 161991_at   | 15.9   | 9.3    | 21     | 20.8   | 11.6   | 22.8   | 13.3   | 19.1   | 0.989869782 | 16.75    | 16.7     | 0.05    | 1.002994012 | 0.9689  | 1.01   |
| 161992_at   | 23.1   | 21.9   | 16.9   | 30.4   | 14.3   | 25.8   | 5      | 12.8   | 0.151875882 | 23.075   | 14.475   | 8.6     | 1.594127807 | 0.1459  | -1.819 |
| 161993_r_at | 3.2    | 1.6    | 2.1    | 6      | 1.8    | 9.6    | 0.8    | 7.1    | 0.527302444 | 3.225    | 4.825    | 1.6     | 0.668393782 | 0.9108  | 1.08   |
| 161994_f_at | 270.4  | 230.3  | 297.9  | 303.9  | 299.8  | 307.7  | 344.7  | 317.5  | 0.08594443  | 275.625  | 317.425  | 41.8    | 0.86831535  | 0.08342 | 1.157  |
| 161995_r_at | 900.8  | 604.4  | 580.3  | 545.5  | 535.2  | 892.2  | 558.6  | 579.3  | 0.893320673 | 657.75   | 641.325  | 16.425  | 1.02561104  | 0.8736  | -1.028 |
| 161996_f_at | 11.3   | 5.3    | 7.7    | 31.9   | 13.4   | 9.8    | 11     | 10.6   | 0.672509173 | 14.05    | 11.2     | 2.85    | 1.254464286 | 0.9739  | 1.013  |
| 161997_f_at | 224    | 254.8  | 259.9  | 441    | 266.9  | 181.4  | 397.1  | 413.2  | 0.79890211  | 294.925  | 314.65   | 19.725  | 0.937311298 | 0.849   | 1.05   |
| 161998_f_at | 156.3  | 121.1  | 95.1   | 119.2  | 190.9  | 229.4  | 127.7  | 137.6  | 0.137363994 | 122.925  | 171.4    | 48.475  | 0.71718203  | 0.1115  | 1.376  |
| 161999_at   | 5      | 3.3    | 2.3    | 3      | 2.4    | 4.3    | 3.3    | 2.8    | 0.78706636  | 3.4      | 3.2      | 0.2     | 1.0625      | 0.8453  | -1.043 |



|             |        |        |        |        |        |        |        |        |             |          |         |         |             |         |        |
|-------------|--------|--------|--------|--------|--------|--------|--------|--------|-------------|----------|---------|---------|-------------|---------|--------|
| 162000_r_at | 27.9   | 1.8    | 9.4    | 2.6    | 6.5    | 36.4   | 11.3   | 14.3   | 0.484155854 | 10.425   | 17.125  | 6.7     | 0.608759124 | 0.2797  | 2.366  |
| 162001_f_at | 141.7  | 116.8  | 122.6  | 121.2  | 139.1  | 165.1  | 116.4  | 146.5  | 0.221579808 | 125.575  | 141.775 | 16.2    | 0.885734438 | 0.2164  | 1.123  |
| 162002_r_at | 26     | 26.1   | 55.5   | 60.5   | 47.9   | 66.2   | 55     | 16     | 0.775293157 | 42.025   | 46.275  | 4.25    | 0.908157753 | 0.9029  | 1.051  |
| 162003_at   | 265.8  | 214.6  | 198.4  | 226.7  | 270.3  | 320.5  | 184.6  | 229    | 0.483948164 | 226.375  | 251.1   | 24.725  | 0.901533254 | 0.5285  | 1.093  |
| 162004_i_at | 76.2   | 45.2   | 31.2   | 51.2   | 30.9   | 71.8   | 24.8   | 67.4   | 0.889874847 | 50.95    | 48.725  | 2.225   | 1.045664443 | 0.7745  | -1.103 |
| 162005_at   | 291.9  | 287.2  | 205.5  | 203.8  | 232.3  | 324.1  | 187    | 204.3  | 0.804049352 | 247.1    | 236.925 | 10.175  | 1.04294608  | 0.7605  | -1.051 |
| 162006_r_at | 878.5  | 651.5  | 659.6  | 671.4  | 535.7  | 1109.4 | 748.1  | 741.1  | 0.628632863 | 715.25   | 783.575 | 68.325  | 0.912803497 | 0.7053  | 1.068  |
| 162007_i_at | 117    | 135.4  | 128.9  | 154.9  | 122    | 164.8  | 134.5  | 167    | 0.382219936 | 134.05   | 147.075 | 13.025  | 0.911439742 | 0.3932  | 1.093  |
| 162008_r_at | 15.2   | 5.6    | 3.5    | 1.2    | 1      | 16.6   | 7.4    | 7.3    | 0.71545468  | 6.375    | 8.075   | 1.7     | 0.789473684 | 0.7889  | 1.253  |
| 162009_f_at | 224.3  | 198.5  | 164.8  | 153.8  | 206.2  | 253.8  | 238.6  | 254    | 0.040325271 | 185.35   | 238.15  | 52.8    | 0.778290993 | 0.04044 | 1.295  |
| 162010_r_at | 42.9   | 32.1   | 45.3   | 58.2   | 47.1   | 59.8   | 51.8   | 35.6   | 0.611250075 | 44.625   | 48.575  | 3.95    | 0.91868245  | 0.6059  | 1.094  |
| 162011_f_at | 195    | 260.9  | 311.1  | 449    | 425.7  | 408.7  | 280.7  | 503.6  | 0.206879461 | 304      | 404.675 | 100.675 | 0.751220115 | 0.1964  | 1.364  |
| 162012_r_at | 5.7    | 8.3    | 6.1    | 8.5    | 1.9    | 10.1   | 0.4    | 4.8    | 0.280939824 | 7.15     | 4.3     | 2.85    | 1.662790698 | 0.1892  | -2.882 |
| 162013_f_at | 1243.8 | 998.3  | 744.4  | 888.5  | 1012.6 | 1171   | 802.4  | 770.7  | 0.84119948  | 968.75   | 939.175 | 29.575  | 1.031490404 | 0.8526  | -1.029 |
| 162014_i_at | 339.6  | 304.7  | 307.4  | 357.7  | 271.1  | 409.2  | 226.2  | 278.8  | 0.499378775 | 327.35   | 296.325 | 31.025  | 1.104699232 | 0.388   | -1.129 |
| 162015_f_at | 5.1    | 28.2   | 17     | 30.2   | 17.6   | 35.1   | 8.3    | 13.3   | 0.856548898 | 20.125   | 18.575  | 1.55    | 1.083445491 | 0.97    | -1.02  |
| 162016_f_at | 29.6   | 46.9   | 57.9   | 72.7   | 23.4   | 12.2   | 44.2   | 38.8   | 0.108664466 | 51.775   | 29.65   | 22.125  | 1.746205734 | 0.1258  | -1.861 |
| 162017_at   | 41.4   | 22.8   | 28.5   | 11.8   | 49.3   | 48.2   | 15.9   | 40.5   | 0.26184506  | 26.125   | 38.475  | 12.35   | 0.679012346 | 0.3378  | 1.48   |
| 162018_r_at | 89.9   | 85.3   | 69.2   | 75     | 71.8   | 141.5  | 64.3   | 74     | 0.691035939 | 79.85    | 87.9    | 8.05    | 0.908418658 | 0.8031  | 1.05   |
| 162019_r_at | 621.6  | 543.4  | 532.2  | 521.8  | 391.1  | 695.7  | 489.4  | 403.7  | 0.468720194 | 554.75   | 494.975 | 59.775  | 1.120763675 | 0.3523  | -1.149 |
| 162020_at   | 182.1  | 40     | 181.3  | 180.6  | 192.3  | 277.2  | 157.8  | 145.8  | 0.346138454 | 146      | 193.275 | 47.275  | 0.755400336 | 0.3502  | 1.506  |
| 162021_r_at | 59.8   | 103    | 91.2   | 132.6  | 95.8   | 155.5  | 154.1  | 102.9  | 0.216602359 | 96.65    | 127.075 | 30.425  | 0.760574464 | 0.2187  | 1.335  |
| 162022_f_at | 122.1  | 111.5  | 142.7  | 235.2  | 180.8  | 62.7   | 157.9  | 190.9  | 0.909865248 | 152.875  | 148.075 | 4.8     | 1.032416005 | 0.8225  | -1.075 |
| 162023_f_at | 277.9  | 273.3  | 257.9  | 267.9  | 259.7  | 256.5  | 248.2  | 298.3  | 0.780043197 | 269.25   | 265.675 | 3.575   | 1.013456291 | 0.7346  | 1.016  |
| 162024_at   | 12.7   | 4.7    | 10.1   | 9.5    | 9.4    | 12.2   | 25     | 10.1   | 0.284759022 | 9.25     | 14.175  | 4.925   | 0.652557319 | 0.2452  | 1.49   |
| 162025_r_at | 17.5   | 1.9    | 3.5    | 1.6    | 2      | 21.9   | 1.9    | 16.8   | 0.507699435 | 6.125    | 10.65   | 4.525   | 0.575117371 | 0.5892  | 1.629  |
| 162026_r_at | 220.9  | 201.5  | 156.6  | 182.5  | 131.2  | 240.3  | 208.2  | 150.6  | 0.797737724 | 190.375  | 182.575 | 7.8     | 1.042722169 | 0.7039  | -1.065 |
| 162027_f_at | 49     | 59     | 27.7   | 29.7   | 45.3   | 92.2   | 48.9   | 49.4   | 0.245082279 | 41.35    | 58.95   | 17.6    | 0.7014419   | 0.1962  | 1.436  |
| 162028_f_at | 21.7   | 19.9   | 15.5   | 16.7   | 15.9   | 24.3   | 15     | 18.1   | 0.962481339 | 18.45    | 18.325  | 0.125   | 1.006821282 | 0.9061  | 1.016  |
| 162029_r_at | 18.7   | 10.5   | 3.4    | 14.7   | 14.6   | 13.6   | 19.6   | 12.6   | 0.413560751 | 11.825   | 15.1    | 3.275   | 0.783112583 | 0.3458  | 1.486  |
| 162030_r_at | 282.2  | 182    | 193.1  | 277.7  | 206.5  | 200.4  | 267.6  | 163.7  | 0.508916166 | 233.75   | 209.55  | 24.2    | 1.115485564 | 0.5217  | -1.11  |
| 162031_f_at | 391.2  | 389.5  | 359.2  | 422.1  | 429    | 512.3  | 399.6  | 381.7  | 0.271045916 | 390.5    | 430.65  | 40.15   | 0.906768838 | 0.247   | 1.098  |
| 162032_f_at | 2210.3 | 2839.3 | 2425.6 | 2386.5 | 2580.4 | 2486.6 | 1436.1 | 2277.7 | 0.403241032 | 2465.425 | 2195.2  | 270.225 | 1.123098123 | 0.3818  | -1.147 |
| 162033_f_at | 480.2  | 434.9  | 422.9  | 488.9  | 427.8  | 374.5  | 356.8  | 365.2  | 0.016250102 | 456.725  | 381.075 | 75.65   | 1.198517352 | 0.01537 | -1.199 |
| 162034_r_at | 66.1   | 52     | 54.4   | 80.3   | 28.6   | 69.6   | 63.3   | 55     | 0.44805193  | 63.2     | 54.125  | 9.075   | 1.167667436 | 0.4212  | -1.214 |
| 162035_f_at | 14.2   | 27     | 28.6   | 40.5   | 9.9    | 27.1   | 18.8   | 17.5   | 0.207943046 | 27.575   | 18.325  | 9.25    | 1.504774898 | 0.2275  | -1.499 |
| 162036_r_at | 293.6  | 210.5  | 183.4  | 248.9  | 177.2  | 329.7  | 215.2  | 235.1  | 0.901963625 | 234.1    | 239.3   | 5.2     | 0.978269954 | 0.9458  | 1.012  |
| 162037_f_at | 211.7  | 158.3  | 177.8  | 205.7  | 179.6  | 277.9  | 228.4  | 200    | 0.239347428 | 188.375  | 221.475 | 33.1    | 0.850547466 | 0.2286  | 1.168  |
| 162038_f_at | 20.5   | 63.8   | 33.6   | 74.1   | 16.4   | 48.9   | 65.9   | 17     | 0.555629246 | 48       | 37.05   | 10.95   | 1.295546559 | 0.517   | -1.378 |
| 162039_f_at | 161.6  | 93.1   | 99.1   | 145.4  | 114.8  | 138.5  | 121.7  | 124.7  | 0.994734793 | 124.8    | 124.925 | 0.125   | 0.9989994   | 0.8559  | 1.027  |
| 162040_r_at | 39.7   | 15     | 15.8   | 18.3   | 15.3   | 27.4   | 24.1   | 15     | 0.8041126   | 22.2     | 20.45   | 1.75    | 1.085574572 | 0.9053  | -1.035 |
| 162041_f_at | 340.3  | 196.4  | 218.6  | 280.3  | 270.2  | 508    | 275.5  | 280.7  | 0.316022427 | 258.9    | 333.6   | 74.7    | 0.776079137 | 0.2724  | 1.269  |
| 162042_i_at | 15.2   | 6.7    | 11.2   | 3      | 4.1    | 12.4   | 3      | 3.1    | 0.371598084 | 9.025    | 5.65    | 3.375   | 1.597345133 | 0.3465  | -1.645 |
| 162043_i_at | 18.2   | 4.7    | 13.3   | 3.9    | 20.9   | 19     | 2.1    | 10.7   | 0.589967323 | 10.025   | 13.175  | 3.15    | 0.760910816 | 0.7934  | 1.195  |
| 162044_f_at | 15.2   | 12.8   | 6.7    | 13.5   | 6.5    | 25.7   | 32.9   | 36.3   | 0.137710427 | 12.05    | 25.35   | 13.3    | 0.475345168 | 0.2184  | 1.832  |
| 162045_r_at | 76.2   | 15.1   | 16.7   | 21.9   | 28.3   | 81.3   | 60.9   | 38.6   | 0.335135909 | 32.475   | 52.275  | 19.8    | 0.621233859 | 0.1981  | 1.895  |
| 162046_at   | 13.1   | 1.6    | 2.8    | 3.1    | 10.7   | 9.7    | 2.2    | 11.2   | 0.371265485 | 5.15     | 8.45    | 3.3     | 0.609467456 | 0.3157  | 1.932  |
| 162047_f_at | 36.8   | 62.6   | 81.5   | 80.3   | 108.9  | 89.2   | 61.3   | 74.2   | 0.261880298 | 65.3     | 83.4    | 18.1    | 0.782973621 | 0.2737  | 1.308  |
| 162048_r_at | 20.6   | 32.3   | 15.3   | 24.7   | 48.5   | 33.4   | 18.7   | 14.9   | 0.538687428 | 23.225   | 28.875  | 5.65    | 0.804329004 | 0.6555  | 1.158  |
| 162049_f_at | 51.8   | 58.5   | 50.3   | 55.9   | 45.8   | 83     | 56.8   | 65.7   | 0.353214166 | 54.125   | 62.825  | 8.7     | 0.861520096 | 0.3627  | 1.136  |
| 162050_at   | 36.4   | 32.7   | 32.5   | 29.1   | 41.1   | 60.7   | 33.2   | 31.7   | 0.271809664 | 32.675   | 41.675  | 9       | 0.784043191 | 0.2238  | 1.234  |
| 162051_r_at | 7.4    | 0.1    | 0.8    | 0.1    | 3.4    | 3.2    | 0.3    | 0.1    | 0.86800083  | 2.1      | 1.75    | 0.35    | 1.2         | 0.8122  | 1.432  |
| 162052_i_at | 40.1   | 21.2   | 13.2   | 18.2   | 10.5   | 57.2   | 2.5    | 44.4   | 0.722586059 | 23.175   | 28.65   | 5.475   | 0.808900524 | 0.7269  | -1.32  |
| 162053_i_at | 41.9   | 14.2   | 33.7   | 42.6   | 22.5   | 40.2   | 27.8   | 38.9   | 0.927878991 | 33.1     | 32.35   | 0.75    | 1.023183926 | 0.9113  | 1.035  |
| 162054_r_at | 24.6   | 24.3   | 4      | 8.8    | 8      | 16.3   | 4.1    | 24     | 0.748414268 | 15.425   | 13.1    | 2.325   | 1.177480916 | 0.8427  | -1.129 |
| 162055_f_at | 178.2  | 268.5  | 269.4  | 191.1  | 244.3  | 209.6  | 256.3  | 182.8  | 0.909097688 | 226.8    | 223.25  | 3.55    | 1.015901456 | 0.9618  | 1.007  |



|             |        |        |        |        |        |        |        |        |             |          |          |        |             |         |        |
|-------------|--------|--------|--------|--------|--------|--------|--------|--------|-------------|----------|----------|--------|-------------|---------|--------|
| 162056_f_at | 35.7   | 30.6   | 26.3   | 24.6   | 21.5   | 153.4  | 23.5   | 29.4   | 0.454094782 | 29.3     | 56.95    | 27.65  | 0.514486392 | 0.5569  | 1.339  |
| 162057_f_at | 447.8  | 617.7  | 903.6  | 818.6  | 565    | 511.4  | 814.3  | 819.1  | 0.88664586  | 696.925  | 677.45   | 19.475 | 1.028747509 | 0.9426  | -1.015 |
| 162058_f_at | 19.2   | 19.2   | 19     | 16     | 28.4   | 17.5   | 14.7   | 21.4   | 0.528700932 | 18.35    | 20.5     | 2.15   | 0.895121951 | 0.5978  | 1.086  |
| 162059_r_at | 34     | 31     | 5.1    | 13.8   | 11.3   | 53.9   | 17.2   | 7.5    | 0.910515692 | 20.975   | 22.475   | 1.5    | 0.933259177 | 0.979   | 1.017  |
| 162060_r_at | 5.4    | 7.2    | 3.8    | 4.6    | 3.3    | 3.6    | 5.2    | 6      | 0.484316396 | 5.25     | 4.525    | 0.725  | 1.160220994 | 0.4798  | -1.159 |
| 162061_f_at | 70.4   | 118.2  | 101.5  | 112.9  | 80.7   | 77.7   | 74     | 130.2  | 0.575809701 | 100.75   | 90.65    | 10.1   | 1.11141754  | 0.5412  | -1.121 |
| 162062_r_at | 1.6    | 1      | 1      | 3      | 0.8    | 5.8    | 1.3    | 5.1    | 0.309768686 | 1.65     | 3.25     | 1.6    | 0.507692308 | 0.4111  | 1.628  |
| 162063_f_at | 38.5   | 9.7    | 8.7    | 14.2   | 10.7   | 12.7   | 4.1    | 24.2   | 0.578861807 | 17.775   | 12.925   | 4.85   | 1.375241779 | 0.5628  | -1.357 |
| 162064_at   | 15.7   | 15.6   | 6.4    | 11.5   | 6.9    | 37.7   | 6.3    | 17     | 0.578379421 | 12.3     | 16.975   | 4.675  | 0.724594993 | 0.8284  | 1.112  |
| 162065_r_at | 29.9   | 54     | 12.6   | 33.8   | 29.5   | 67.1   | 39.6   | 24.7   | 0.570193167 | 32.575   | 40.225   | 7.65   | 0.809819764 | 0.5149  | 1.295  |
| 162066_f_at | 16.4   | 14.1   | 56     | 166.7  | 137.8  | 28.3   | 152.4  | 105.3  | 0.384450303 | 63.3     | 105.95   | 42.65  | 0.597451628 | 0.2738  | 2.318  |
| 162067_at   | 35.3   | 27.1   | 37.4   | 27.8   | 33.8   | 90.7   | 60.7   | 25.7   | 0.252397711 | 31.9     | 52.725   | 20.825 | 0.605026079 | 0.2343  | 1.479  |
| 162068_r_at | 7.2    | 4.9    | 4.7    | 5.8    | 7.4    | 23.6   | 6.2    | 14.2   | 0.168618967 | 5.65     | 12.85    | 7.2    | 0.439688716 | 0.07508 | 2.001  |
| 162069_at   | 51.7   | 23.4   | 26.7   | 42.6   | 37.5   | 24.8   | 13.5   | 26.1   | 0.25111874  | 36.1     | 25.475   | 10.625 | 1.417075564 | 0.2525  | -1.432 |
| 162070_r_at | 15.6   | 12.1   | 8.2    | 18     | 9.6    | 5.8    | 4.6    | 9.2    | 0.056270256 | 13.475   | 7.3      | 6.175  | 1.845890411 | 0.04652 | -1.86  |
| 162071_i_at | 12.5   | 14.1   | 12.6   | 12.9   | 21.6   | 13.2   | 22.5   | 10.4   | 0.287515417 | 13.025   | 16.925   | 3.9    | 0.76957164  | 0.3072  | 1.238  |
| 162072_at   | 6.5    | 9.5    | 4.3    | 3.8    | 5.4    | 4.9    | 7      | 4.8    | 0.738489099 | 6.025    | 5.525    | 0.5    | 1.090497738 | 0.8817  | -1.035 |
| 162073_r_at | 15.7   | 3.9    | 1.6    | 2.4    | 2.9    | 30.5   | 2.6    | 18.2   | 0.360227937 | 5.9      | 13.55    | 7.65   | 0.435424354 | 0.4149  | 2.02   |
| 162074_r_at | 353.4  | 181.2  | 203.6  | 229.4  | 154.1  | 332.9  | 281.7  | 195.2  | 0.987334608 | 241.9    | 240.975  | 0.925  | 1.003838572 | 0.9506  | -1.015 |
| 162075_r_at | 1      | 6.5    | 0.9    | 0.7    | 3.6    | 0.8    | 0.4    | 3      | 0.849117543 | 2.275    | 1.95     | 0.325  | 1.166666667 | 0.9873  | 1.012  |
| 162076_r_at | 5.3    | 0.1    | 0.2    | 0.4    | 0      | 5.6    | 0.5    | 11     | 0.383869733 | 1.5      | 4.275    | 2.775  | 0.350877193 | 0.5658  | 2.515  |
| 162077_f_at | 2192   | 1933.4 | 2172.7 | 2621.5 | 2368.2 | 2497.4 | 2420.2 | 2272.8 | 0.354366512 | 2229.9   | 2389.65  | 159.75 | 0.933149206 | 0.3009  | 1.077  |
| 162078_at   | 6.7    | 2.2    | 13.5   | 23.2   | 17.6   | 24     | 27.9   | 14.7   | 0.135583537 | 11.4     | 21.05    | 9.65   | 0.541567696 | 0.1377  | 2.482  |
| 162079_at   | 8.4    | 6.5    | 6.1    | 5.5    | 7.4    | 12.3   | 6.3    | 5      | 0.547952294 | 6.625    | 7.75     | 1.125  | 0.85483871  | 0.6149  | 1.118  |
| 162080_f_at | 43     | 61.4   | 40.3   | 49     | 55.5   | 56.1   | 47.8   | 51.5   | 0.44459925  | 48.425   | 52.725   | 4.3    | 0.918444761 | 0.3723  | 1.101  |
| 162081_f_at | 784.6  | 624.9  | 616.7  | 542.2  | 737.3  | 855    | 715.3  | 747    | 0.098087018 | 642.1    | 763.65   | 121.55 | 0.840830223 | 0.08219 | 1.197  |
| 162082_r_at | 17.2   | 4.7    | 9.7    | 3.6    | 11.4   | 29.5   | 12.3   | 2.9    | 0.452327432 | 8.8      | 14.025   | 5.225  | 0.62745098  | 0.5573  | 1.448  |
| 162083_f_at | 47.7   | 54.7   | 47.2   | 46     | 73.8   | 92.1   | 47.7   | 46.1   | 0.243881761 | 48.9     | 64.925   | 16.025 | 0.753176742 | 0.211   | 1.275  |
| 162084_i_at | 71.1   | 86     | 34.2   | 56.7   | 57.9   | 95     | 49.5   | 60.7   | 0.808607783 | 62       | 65.775   | 3.775  | 0.942607374 | 0.7451  | 1.086  |
| 162085_r_at | 38     | 21.2   | 24.4   | 10.1   | 10.7   | 29     | 17.8   | 27.5   | 0.772881969 | 23.425   | 21.25    | 2.175  | 1.102352941 | 0.8645  | -1.066 |
| 162086_r_at | 9.8    | 6.7    | 1.7    | 0.9    | 0.5    | 1.9    | 0.6    | 1.3    | 0.177334701 | 4.775    | 1.075    | 3.7    | 4.441860465 | 0.1117  | -3.344 |
| 162087_f_at | 19.7   | 11     | 12.4   | 21.2   | 12.3   | 24.3   | 19.7   | 4.7    | 0.875623604 | 16.075   | 15.25    | 0.825  | 1.054098361 | 0.6677  | -1.199 |
| 162088_r_at | 11.5   | 24     | 14.9   | 18.2   | 10.5   | 12.5   | 5      | 16.2   | 0.136631619 | 17.15    | 11.05    | 6.1    | 1.552036199 | 0.1514  | -1.631 |
| 162089_r_at | 2295.4 | 1806.8 | 1765.7 | 1954.4 | 1528.3 | 2006.8 | 1736.5 | 1872.3 | 0.324764045 | 1955.575 | 1785.975 | 169.6  | 1.094962136 | 0.3191  | -1.095 |
| 162090_i_at | 22.3   | 11.2   | 14     | 14.2   | 1.1    | 18.8   | 11.2   | 4.5    | 0.21424364  | 15.425   | 8.9      | 6.525  | 1.733146067 | 0.1831  | -2.642 |
| 162091_f_at | 526.9  | 532    | 657.5  | 756.4  | 765.5  | 560.8  | 690.1  | 655.8  | 0.50213372  | 618.2    | 668.05   | 49.85  | 0.925379837 | 0.4753  | 1.087  |
| 162092_f_at | 67.6   | 49.9   | 61     | 91.2   | 71.6   | 135    | 106    | 87.2   | 0.099608048 | 67.425   | 99.95    | 32.525 | 0.674587294 | 0.07941 | 1.478  |
| 162093_at   | 151.5  | 103.1  | 78.6   | 103.5  | 92.9   | 161.1  | 120.1  | 115.2  | 0.551740941 | 109.175  | 122.325  | 13.15  | 0.892499489 | 0.5149  | 1.13   |
| 162094_f_at | 199.3  | 252.5  | 220    | 302.8  | 237.2  | 248.4  | 225.4  | 277    | 0.899810576 | 243.65   | 247      | 3.35   | 0.986437247 | 0.8256  | 1.023  |
| 162095_f_at | 186.7  | 90.7   | 133.3  | 147.2  | 118.4  | 123.7  | 146.5  | 158.1  | 0.904123834 | 139.475  | 136.675  | 2.8    | 1.020486556 | 0.9766  | 1.005  |
| 162096_at   | 19.3   | 9.7    | 8.9    | 44     | 33.7   | 42     | 21.5   | 34.7   | 0.239435973 | 20.475   | 32.975   | 12.5   | 0.620924943 | 0.1445  | 1.944  |
| 162097_r_at | 93.9   | 100    | 108.4  | 114.6  | 90.8   | 105.1  | 111.7  | 107    | 0.931423303 | 104.225  | 103.65   | 0.575  | 1.005547516 | 0.9266  | 1.006  |
| 162098_i_at | 50     | 44.4   | 7.8    | 11.4   | 11.4   | 33     | 33     | 4.5    | 0.572874477 | 28.4     | 20.475   | 7.925  | 1.387057387 | 0.6537  | -1.374 |
| 162099_f_at | 49.2   | 50.7   | 52.4   | 95.8   | 40     | 14.4   | 10.8   | 43     | 0.050585895 | 62.025   | 27.05    | 34.975 | 2.29297597  | 0.04729 | -2.615 |
| 162100_r_at | 43.8   | 90.2   | 27.6   | 25.4   | 92.3   | 77.6   | 38.6   | 44     | 0.442464345 | 46.75    | 63.125   | 16.375 | 0.740594059 | 0.3438  | 1.447  |
| 162101_f_at | 2.9    | 1.7    | 0.7    | 1      | 1.8    | 3.8    | 7.6    | 0.5    | 0.324766989 | 1.575    | 3.425    | 1.85   | 0.459854015 | 0.4538  | 1.681  |
| 162102_r_at | 68.9   | 49.5   | 42     | 80.9   | 55.6   | 102.1  | 57.7   | 24     | 0.980420109 | 60.325   | 59.85    | 0.475  | 1.007936508 | 0.7809  | -1.102 |
| 162103_i_at | 33.1   | 12.1   | 22.5   | 26.3   | 14.2   | 16.1   | 21.1   | 28.8   | 0.553020912 | 23.5     | 20.05    | 3.45   | 1.172069825 | 0.6357  | -1.142 |
| 162104_f_at | 439.1  | 388.5  | 392    | 468.6  | 362.8  | 354.3  | 289.7  | 381    | 0.035221194 | 422.05   | 346.95   | 75.1   | 1.216457703 | 0.03946 | -1.219 |
| 162105_r_at | 115    | 87.5   | 61.9   | 97.9   | 67.8   | 81.7   | 89.1   | 87.1   | 0.491032828 | 90.575   | 81.425   | 9.15   | 1.11237335  | 0.5693  | -1.091 |
| 162106_f_at | 95.3   | 45     | 59.2   | 76.8   | 52.7   | 90.6   | 71.1   | 45     | 0.786485386 | 69.075   | 64.85    | 4.225  | 1.065150347 | 0.7959  | -1.063 |
| 162107_r_at | 19.4   | 20.4   | 8.5    | 19.7   | 5.4    | 28.2   | 27.6   | 3.8    | 0.923176919 | 17       | 16.25    | 0.75   | 1.046153846 | 0.5554  | -1.43  |
| 162108_f_at | 28.5   | 14.9   | 11.8   | 8.2    | 16.2   | 21.2   | 17.7   | 15.7   | 0.711315901 | 15.85    | 17.7     | 1.85   | 0.895480226 | 0.4633  | 1.237  |
| 162109_f_at | 13.9   | 17.4   | 10.4   | 17.9   | 8.7    | 12.3   | 4.1    | 18.8   | 0.322975703 | 14.9     | 10.975   | 3.925  | 1.357630979 | 0.2676  | -1.53  |
| 162110_f_at | 5.5    | 4.9    | 5.1    | 5.6    | 8.7    | 11     | 8      | 22.6   | 0.121092801 | 5.275    | 12.575   | 7.3    | 0.419483101 | 0.01677 | 2.186  |
| 162111_r_at | 14.1   | 2.2    | 6.3    | 3      | 7.8    | 7.9    | 2.9    | 7.6    | 0.962134243 | 6.4      | 6.55     | 0.15   | 0.977099237 | 0.6807  | 1.233  |



|             |        |       |        |        |        |        |       |       |             |          |         |         |             |         |        |
|-------------|--------|-------|--------|--------|--------|--------|-------|-------|-------------|----------|---------|---------|-------------|---------|--------|
| 162112_i_at | 17.4   | 6.1   | 2.4    | 3      | 2.7    | 5.5    | 2.5   | 3.5   | 0.372191925 | 7.225    | 3.55    | 3.675   | 2.035211268 | 0.392   | -1.554 |
| 162113_r_at | 41.9   | 7.7   | 7.4    | 27.9   | 31.5   | 130    | 31.8  | 38.7  | 0.2275468   | 21.225   | 58      | 36.775  | 0.365948276 | 0.1012  | 2.943  |
| 162114_f_at | 295.7  | 291.4 | 207.9  | 305.2  | 217    | 289.1  | 290.9 | 234.5 | 0.581412503 | 275.05   | 257.875 | 17.175  | 1.066602036 | 0.6179  | -1.063 |
| 162115_i_at | 48.7   | 14    | 33.3   | 28.1   | 15.3   | 43.3   | 34.9  | 5.5   | 0.598382932 | 31.025   | 24.75   | 6.275   | 1.253535354 | 0.4814  | -1.493 |
| 162116_r_at | 0.7    | 0.1   | 0.2    | 1.8    | 3.7    | 1.2    | 0.1   | 0.1   | 0.569860282 | 0.7      | 1.275   | 0.575   | 0.549019608 | 0.9508  | 1.083  |
| 162117_f_at | 3.8    | 6.5   | 5.8    | 6.2    | 3.9    | 15.2   | 6.5   | 5.9   | 0.431521991 | 5.575    | 7.875   | 2.3     | 0.707936508 | 0.4696  | 1.271  |
| 162118_f_at | 78.6   | 48.9  | 49.7   | 59.5   | 49.8   | 16.2   | 59.9  | 49.4  | 0.244175537 | 59.175   | 43.825  | 15.35   | 1.350256703 | 0.2669  | -1.476 |
| 162119_r_at | 2.5    | 11.6  | 1.4    | 8.3    | 1.6    | 25.2   | 1.3   | 0.7   | 0.856355757 | 5.95     | 7.2     | 1.25    | 0.826388889 | 0.567   | -1.771 |
| 162120_at   | 9.6    | 10.6  | 3.3    | 1.2    | 14.2   | 11     | 8.1   | 10.3  | 0.13768652  | 6.175    | 10.9    | 4.725   | 0.566513761 | 0.1469  | 2.386  |
| 162121_at   | 30.1   | 10.3  | 6.1    | 5.1    | 3.7    | 6.7    | 3.2   | 4     | 0.242002733 | 12.9     | 4.4     | 8.5     | 2.931818182 | 0.09737 | -2.331 |
| 162122_f_at | 381.2  | 193.2 | 271.1  | 221.1  | 281.8  | 348.8  | 204.1 | 342.1 | 0.624829203 | 266.65   | 294.2   | 27.55   | 0.90635622  | 0.5886  | 1.117  |
| 162123_f_at | 253.4  | 246.3 | 179.3  | 224.1  | 252.2  | 251.9  | 187.4 | 189.4 | 0.830636708 | 225.775  | 220.225 | 5.55    | 1.025201498 | 0.8244  | -1.027 |
| 162124_r_at | 22.8   | 23.2  | 5.1    | 13.2   | 20.2   | 36     | 33.4  | 17.8  | 0.138632501 | 16.075   | 26.85   | 10.775  | 0.598696462 | 0.1672  | 1.863  |
| 162125_f_at | 850.7  | 1230  | 1232.2 | 2086.4 | 1150.1 | 849.7  | 1211  | 1691  | 0.70775499  | 1349.825 | 1225.45 | 124.375 | 1.101493329 | 0.7608  | -1.077 |
| 162126_r_at | 23.6   | 13.8  | 8.3    | 6.5    | 6.2    | 6.9    | 4.1   | 6.4   | 0.159089237 | 13.05    | 5.9     | 7.15    | 2.211864407 | 0.06714 | -1.992 |
| 162127_r_at | 33.4   | 11    | 31.7   | 9.2    | 18.2   | 49.7   | 25.4  | 23.3  | 0.444685857 | 21.325   | 29.15   | 7.825   | 0.731560892 | 0.357   | 1.496  |
| 162128_i_at | 13.1   | 18.9  | 37.8   | 57     | 5.9    | 28.7   | 48.9  | 57.1  | 0.827590019 | 31.7     | 35.15   | 3.45    | 0.901849218 | 0.9651  | -1.028 |
| 162129_f_at | 36.5   | 19.4  | 34.7   | 19.6   | 14.2   | 0.5    | 42.4  | 38.3  | 0.752549249 | 27.55    | 23.85   | 3.7     | 1.155136268 | 0.4121  | -2.492 |
| 162130_r_at | 0.8    | 1.7   | 7.4    | 6.4    | 2.3    | 22     | 2.2   | 1.6   | 0.607584692 | 4.075    | 7.025   | 2.95    | 0.580071174 | 0.7706  | 1.277  |
| 162131_f_at | 105.8  | 113   | 100.1  | 114.5  | 123.1  | 130    | 77.3  | 170.3 | 0.445011874 | 108.35   | 125.175 | 16.825  | 0.865588177 | 0.5435  | 1.113  |
| 162132_f_at | 35.3   | 27.3  | 17.9   | 73.2   | 33.3   | 21.7   | 40.7  | 26.9  | 0.579072782 | 38.425   | 30.65   | 7.775   | 1.253670473 | 0.7277  | -1.126 |
| 162133_at   | 322.1  | 158.5 | 204.7  | 313.7  | 191.2  | 277.8  | 238.9 | 207.7 | 0.664138576 | 249.75   | 228.9   | 20.85   | 1.091087811 | 0.7842  | -1.056 |
| 162134_r_at | 675    | 668.4 | 584.9  | 497.1  | 485.3  | 741.7  | 663.4 | 536.5 | 0.99602585  | 606.35   | 606.725 | 0.375   | 0.999381928 | 0.9622  | 1.006  |
| 162135_r_at | 19.1   | 0.7   | 1.3    | 0.7    | 4.9    | 5.9    | 3.6   | 8.6   | 0.952491416 | 5.45     | 5.75    | 0.3     | 0.947826087 | 0.2321  | 2.935  |
| 162136_r_at | 33.9   | 34    | 28.6   | 39.7   | 16.3   | 26.1   | 39    | 15.1  | 0.172851083 | 34.05    | 24.125  | 9.925   | 1.411398964 | 0.1244  | -1.511 |
| 162137_f_at | 6.9    | 6.6   | 16.6   | 6.3    | 23.6   | 8.4    | 30.9  | 6.6   | 0.265752642 | 9.1      | 17.375  | 8.275   | 0.523741007 | 0.2756  | 1.704  |
| 162138_s_at | 675    | 815.1 | 1072.1 | 1017.9 | 850.4  | 692.4  | 939.5 | 1032  | 0.8929351   | 895.025  | 878.575 | 16.45   | 1.018723501 | 0.9296  | 1.013  |
| 162139_r_at | 34.7   | 27.1  | 42.5   | 19.8   | 26.7   | 58.5   | 23.4  | 41.2  | 0.524217073 | 31.025   | 37.45   | 6.425   | 0.828437917 | 0.5665  | 1.175  |
| 162140_i_at | 23.5   | 15.3  | 24     | 22.7   | 16.3   | 36     | 20    | 22.4  | 0.652357442 | 21.375   | 23.675  | 2.3     | 0.902851109 | 0.7235  | 1.077  |
| 162141_r_at | 4.3    | 1.1   | 0.5    | 0.5    | 1.3    | 0.9    | 0.8   | 0.4   | 0.474695006 | 1.6      | 0.85    | 0.75    | 1.882352941 | 0.6247  | -1.338 |
| 162142_f_at | 105.8  | 95.3  | 76     | 96     | 72.4   | 86.4   | 100.3 | 73.7  | 0.306819332 | 93.275   | 83.2    | 10.075  | 1.12109375  | 0.3072  | -1.123 |
| 162143_f_at | 105.6  | 80    | 113.1  | 121.2  | 96     | 106.4  | 97.8  | 71.6  | 0.342160963 | 104.975  | 92.95   | 12.025  | 1.129370629 | 0.3747  | -1.128 |
| 162144_at   | 90.3   | 93.8  | 74.2   | 92     | 72.2   | 100.2  | 126.6 | 88.2  | 0.496754631 | 87.575   | 96.8    | 9.225   | 0.904700413 | 0.5425  | 1.087  |
| 162145_r_at | 69.8   | 15    | 65.1   | 31.9   | 13.1   | 68.3   | 5.2   | 14.3  | 0.342380353 | 45.45    | 25.225  | 20.225  | 1.801783944 | 0.2242  | -2.394 |
| 162146_r_at | 2      | 10.9  | 0.8    | 0.9    | 2.8    | 6.4    | 3.8   | 0.8   | 0.944189406 | 3.65     | 3.45    | 0.2     | 1.057971014 | 0.709   | 1.34   |
| 162147_f_at | 142.4  | 116.8 | 196.3  | 113.9  | 140.8  | 221.7  | 164.7 | 147.5 | 0.358891845 | 142.35   | 168.675 | 26.325  | 0.843930636 | 0.313   | 1.195  |
| 162148_r_at | 15.4   | 3.6   | 15.1   | 2.3    | 9.5    | 25.9   | 2.4   | 22.9  | 0.398522107 | 9.1      | 15.175  | 6.075   | 0.599670511 | 0.5339  | 1.627  |
| 162149_i_at | 17.5   | 7.4   | 22.2   | 16.1   | 25.9   | 12.9   | 20.4  | 27.5  | 0.241348734 | 15.8     | 21.675  | 5.875   | 0.728950404 | 0.2778  | 1.417  |
| 162150_r_at | 134.8  | 105   | 125.8  | 154.5  | 95.2   | 230    | 164.9 | 144.1 | 0.394899972 | 130.025  | 158.55  | 28.525  | 0.8200883   | 0.4555  | 1.172  |
| 162151_i_at | 3.3    | 5     | 1.2    | 2.1    | 2.1    | 2.2    | 3.4   | 2.2   | 0.654642177 | 2.9      | 2.475   | 0.425   | 1.171717172 | 0.8934  | -1.047 |
| 162152_r_at | 57.6   | 6.9   | 19.7   | 33.4   | 22     | 30.8   | 40.7  | 22.5  | 0.974384021 | 29.4     | 29      | 0.4     | 1.013793103 | 0.6618  | 1.245  |
| 162153_i_at | 1195.7 | 989.9 | 922.7  | 1048.5 | 954.7  | 1073.8 | 786   | 917.1 | 0.247763433 | 1039.2   | 932.9   | 106.3   | 1.113945761 | 0.2434  | -1.116 |
| 162154_i_at | 12.2   | 8.9   | 7.9    | 12.9   | 5.5    | 15     | 10.7  | 16.1  | 0.641006079 | 10.475   | 11.825  | 1.35    | 0.885835095 | 0.8266  | 1.065  |
| 162155_f_at | 7.3    | 6.1   | 5.1    | 3.7    | 6.7    | 19.6   | 7.9   | 8.6   | 0.183445262 | 5.55     | 10.7    | 5.15    | 0.518691589 | 0.08053 | 1.802  |
| 162156_f_at | 4.6    | 3.7   | 11.7   | 17.5   | 17.9   | 19     | 11.9  | 9.1   | 0.255879699 | 9.375    | 14.475  | 5.1     | 0.647668394 | 0.2     | 1.808  |
| 162157_f_at | 22.8   | 59.5  | 30.3   | 40.8   | 64     | 29.7   | 26.1  | 41.3  | 0.874514256 | 38.35    | 40.275  | 1.925   | 0.9522036   | 0.8635  | 1.053  |
| 162158_r_at | 5.6    | 7.5   | 10.2   | 2.6    | 13.1   | 6.4    | 2.1   | 1.9   | 0.852888168 | 6.475    | 5.875   | 0.6     | 1.10212766  | 0.6136  | -1.336 |
| 162159_i_at | 87     | 65.4  | 19.4   | 24.8   | 74.7   | 119.3  | 66.9  | 106   | 0.08626479  | 49.15    | 91.725  | 42.575  | 0.535840829 | 0.09069 | 2.194  |
| 162160_at   | 84     | 55.4  | 51.5   | 72.4   | 53.5   | 135.5  | 56.8  | 71.7  | 0.546698443 | 65.825   | 79.375  | 13.55   | 0.829291339 | 0.6015  | 1.142  |
| 162161_r_at | 38.3   | 9.1   | 31.3   | 25.9   | 45.8   | 11.8   | 40.5  | 28.9  | 0.587983927 | 26.15    | 31.75   | 5.6     | 0.823622047 | 0.6647  | 1.224  |
| 162162_f_at | 3.8    | 13.3  | 4.7    | 4.1    | 6.9    | 7.7    | 3.1   | 2.7   | 0.623222702 | 6.475    | 5.1     | 1.375   | 1.269607843 | 0.6444  | -1.214 |
| 162163_at   | 22.5   | 16.8  | 30.9   | 17     | 19.4   | 33     | 31.5  | 21    | 0.394240834 | 21.8     | 26.225  | 4.425   | 0.831267874 | 0.38    | 1.207  |
| 162164_f_at | 124.9  | 118.5 | 61.7   | 88.5   | 131    | 115.3  | 72    | 165.4 | 0.39139385  | 98.4     | 120.925 | 22.525  | 0.813727517 | 0.4333  | 1.222  |
| 162165_f_at | 522.8  | 560.4 | 484.5  | 491.9  | 501.1  | 526.3  | 421.1 | 449.1 | 0.224102822 | 514.9    | 474.4   | 40.5    | 1.085370995 | 0.2144  | -1.088 |
| 162166_f_at | 54.6   | 43.8  | 6.7    | 9.1    | 52     | 36     | 14    | 43.8  | 0.611197686 | 28.55    | 36.45   | 7.9     | 0.783264746 | 0.4304  | 1.674  |
| 162167_f_at | 15.7   | 17.1  | 13.9   | 17.3   | 22     | 67     | 15.3  | 13.5  | 0.365909955 | 16       | 29.45   | 13.45   | 0.543293718 | 0.3324  | 1.473  |



|             |       |       |       |       |       |       |       |       |              |         |         |        |             |          |        |
|-------------|-------|-------|-------|-------|-------|-------|-------|-------|--------------|---------|---------|--------|-------------|----------|--------|
| 162168_r_at | 80.4  | 94.3  | 84.5  | 51.9  | 105.3 | 153.1 | 95.4  | 93.1  | 0.096719133  | 77.775  | 111.725 | 33.95  | 0.696128888 | 0.08141  | 1.441  |
| 162169_r_at | 323   | 275.3 | 182.9 | 251.3 | 120.5 | 332.7 | 221.2 | 286.4 | 0.755187412  | 258.125 | 240.2   | 17.925 | 1.074625312 | 0.6561   | -1.126 |
| 162170_r_at | 3.1   | 1.3   | 2.3   | 1.2   | 15.4  | 3.1   | 2.5   | 2     | 0.327316403  | 1.975   | 5.75    | 3.775  | 0.343478261 | 0.1924   | 2.141  |
| 162171_f_at | 32.8  | 22.5  | 40.8  | 39.7  | 58.5  | 64    | 56.5  | 67.6  | 0.002550353  | 33.95   | 61.65   | 27.7   | 0.550689376 | 0.004976 | 1.859  |
| 162172_f_at | 144.9 | 117.7 | 70.2  | 25.2  | 56.7  | 46.6  | 88.9  | 6.6   | 0.259481253  | 89.5    | 49.7    | 39.8   | 1.800804829 | 0.327    | -2.097 |
| 162173_i_at | 7.1   | 14.6  | 2     | 3     | 26.1  | 6.3   | 8.2   | 3.2   | 0.502931319  | 6.675   | 10.95   | 4.275  | 0.609589041 | 0.4603   | 1.637  |
| 162174_at   | 14.3  | 10.3  | 43.6  | 18.6  | 11.6  | 41.8  | 52.4  | 33.4  | 0.296965031  | 21.7    | 34.8    | 13.1   | 0.623563218 | 0.3224   | 1.631  |
| 162175_at   | 3.2   | 9     | 6.2   | 2.6   | 6.3   | 1.7   | 5.1   | 5.5   | 0.750588292  | 5.25    | 4.65    | 0.6    | 1.129032258 | 0.7979   | -1.119 |
| 162176_r_at | 293.8 | 343.7 | 139.5 | 189.5 | 172.2 | 298   | 209   | 205.7 | 0.721702424  | 241.625 | 221.225 | 20.4   | 1.092213809 | 0.8459   | -1.049 |
| 162177_f_at | 379.9 | 245.1 | 283.8 | 313.7 | 329.2 | 396.1 | 260.8 | 369.5 | 0.447535465  | 305.625 | 338.9   | 33.275 | 0.901814695 | 0.4533   | 1.11   |
| 162178_r_at | 859.4 | 606.2 | 603.6 | 621.1 | 592.2 | 804.2 | 499.6 | 439.4 | 0.416967838  | 672.575 | 583.85  | 88.725 | 1.151965402 | 0.3563   | -1.169 |
| 162179_r_at | 30.6  | 20.6  | 13.4  | 25.6  | 14.5  | 39.4  | 7.5   | 30    | 0.972143305  | 22.55   | 22.85   | 0.3    | 0.986870897 | 0.7662   | -1.137 |
| 162180_r_at | 41.3  | 41    | 33.8  | 48.1  | 60.1  | 100.8 | 52.9  | 70.9  | 0.0620204183 | 41.05   | 71.175  | 30.125 | 0.576747453 | 0.01538  | 1.696  |
| 162181_f_at | 15.1  | 11.9  | 12.6  | 13.2  | 21.3  | 15.7  | 13.2  | 27.1  | 0.140676899  | 13.2    | 19.325  | 6.125  | 0.68305304  | 0.0839   | 1.414  |
| 162182_f_at | 93.7  | 93.2  | 62.6  | 89.2  | 57.6  | 122.9 | 96.4  | 75    | 0.844800522  | 84.675  | 87.975  | 3.3    | 0.962489344 | 0.9514   | 1.012  |
| 162183_at   | 57.1  | 36.3  | 8.2   | 7.8   | 30.6  | 49.4  | 42.6  | 21.4  | 0.552113238  | 27.35   | 36      | 8.65   | 0.759722222 | 0.3229   | 1.793  |
| 162184_at   | 32.4  | 24.1  | 10.6  | 4.8   | 30.8  | 34    | 6.8   | 3.4   | 0.941592658  | 17.975  | 18.75   | 0.775  | 0.958666667 | 0.8691   | -1.13  |
| 162185_i_at | 10.9  | 13.3  | 5.5   | 4     | 2     | 17    | 16.2  | 33.5  | 0.273294143  | 8.425   | 17.175  | 8.75   | 0.490538574 | 0.5432   | 1.545  |
| 162186_r_at | 31.5  | 36.9  | 25.4  | 19.9  | 33.2  | 34.3  | 21    | 21.1  | 0.850364874  | 28.425  | 27.4    | 1.025  | 1.037408759 | 0.8474   | -1.039 |
| 162187_f_at | 2.6   | 4.4   | 1.3   | 1.4   | 1.6   | 2.6   | 2.6   | 1.5   | 0.677799804  | 2.425   | 2.075   | 0.35   | 1.168674699 | 0.829    | -1.076 |
| 162188_f_at | 272.9 | 269.3 | 224.4 | 267.8 | 270.8 | 391.3 | 394.2 | 258.3 | 0.154192331  | 258.6   | 328.65  | 70.05  | 0.786855317 | 0.1209   | 1.25   |
| 162189_r_at | 227.5 | 115.4 | 132   | 176   | 120   | 282.6 | 134   | 190.3 | 0.687033461  | 162.725 | 181.725 | 19     | 0.895446416 | 0.7345   | 1.091  |
| 162190_r_at | 33.9  | 48    | 31.9  | 18.3  | 73.5  | 24.1  | 29    | 22.1  | 0.774539536  | 33.025  | 37.175  | 4.15   | 0.888365837 | 0.8996   | 1.046  |
| 162191_at   | 7.4   | 9.7   | 0.7   | 5.8   | 6.2   | 11.9  | 15.5  | 3.5   | 0.352707482  | 5.9     | 9.275   | 3.375  | 0.636118598 | 0.3767   | 1.944  |
| 162192_f_at | 9.1   | 6.6   | 7     | 11.3  | 9.8   | 15.3  | 8.7   | 12.5  | 0.148440811  | 8.5     | 11.575  | 3.075  | 0.734341253 | 0.1338   | 1.361  |
| 162193_f_at | 9.6   | 14.6  | 7.8   | 19.6  | 22.4  | 22.2  | 19.1  | 9.8   | 0.218066156  | 12.9    | 18.375  | 5.475  | 0.702040816 | 0.2441   | 1.443  |
| 162194_r_at | 4.2   | 4.8   | 3.1   | 7.3   | 18.5  | 10.2  | 12.9  | 14.9  | 0.006964003  | 4.85    | 14.125  | 9.275  | 0.343362832 | 0.00235  | 2.978  |
| 162195_i_at | 45.7  | 8.1   | 32.2  | 39.6  | 33.6  | 65    | 20.2  | 32.2  | 0.633391433  | 31.4    | 37.75   | 6.35   | 0.831788079 | 0.5747   | 1.319  |
| 162196_f_at | 4.1   | 4.8   | 4.3   | 5.4   | 3.8   | 6.3   | 4.7   | 4.8   | 0.692205845  | 4.65    | 4.9     | 0.25   | 0.948979592 | 0.7418   | 1.043  |
| 162197_at   | 6     | 3.8   | 6.4   | 2.5   | 2.4   | 6.3   | 5.1   | 2.3   | 0.649559051  | 4.675   | 4.025   | 0.65   | 1.161490683 | 0.6097   | -1.197 |
| 162198_f_at | 66.6  | 26.9  | 21.5  | 43.2  | 30.2  | 58.3  | 51    | 61.9  | 0.41966301   | 39.55   | 50.35   | 10.8   | 0.78550149  | 0.3537   | 1.352  |
| 162199_r_at | 57.6  | 39.4  | 9.3   | 33.5  | 38.6  | 84.4  | 37.2  | 18.2  | 0.59794774   | 34.95   | 44.6    | 9.65   | 0.783632287 | 0.5922   | 1.331  |
| 162200_r_at | 0.8   | 1.2   | 1     | 4.8   | 0.4   | 3.4   | 0.4   | 0.8   | 0.581345341  | 1.95    | 1.25    | 0.7    | 1.56        | 0.3877   | -1.817 |
| 162201_r_at | 67.2  | 74.5  | 51.2  | 50.6  | 64.3  | 71.5  | 57.5  | 54.8  | 0.876344     | 60.875  | 62.025  | 1.15   | 0.981459089 | 0.8183   | 1.028  |
| 162202_f_at | 203.8 | 137.8 | 144.5 | 150.8 | 124   | 204.3 | 111   | 128.1 | 0.530867534  | 159.225 | 141.85  | 17.375 | 1.122488544 | 0.4426   | -1.142 |
| 162203_r_at | 2.4   | 1     | 2.3   | 6.1   | 1.4   | 5.6   | 1.4   | 2     | 0.822309322  | 2.95    | 2.6     | 0.35   | 1.134615385 | 0.8227   | -1.123 |
| 162204_r_at | 99.6  | 55.6  | 73.1  | 49.1  | 71.5  | 130.1 | 76.5  | 76.3  | 0.324908816  | 69.35   | 88.6    | 19.25  | 0.782731377 | 0.278    | 1.285  |
| 162205_f_at | 314   | 185.2 | 182.1 | 201.3 | 152.3 | 316   | 267.3 | 224.3 | 0.694190684  | 220.65  | 239.975 | 19.325 | 0.919470778 | 0.7213   | 1.079  |
| 162206_f_at | 201.9 | 182.4 | 148.3 | 247   | 150.3 | 192.4 | 212.8 | 265.1 | 0.756231905  | 194.9   | 205.15  | 10.25  | 0.950036559 | 0.774    | 1.049  |
| 162207_f_at | 21.7  | 40    | 36    | 13.4  | 37.7  | 45.9  | 10.7  | 15    | 0.967565343  | 27.775  | 27.325  | 0.45   | 1.016468435 | 0.8212   | -1.108 |
| 162208_f_at | 36.8  | 38.3  | 12.5  | 13.5  | 22.5  | 30.5  | 4.8   | 21.3  | 0.561432211  | 25.275  | 19.775  | 5.5    | 1.278128951 | 0.5728   | -1.362 |
| 162209_r_at | 0.6   | 1.2   | 0.4   | 0.7   | 0.7   | 7.4   | 0.8   | 0.4   | 0.415365003  | 0.725   | 2.325   | 1.6    | 0.311827957 | 0.4667   | 1.684  |
| 162210_r_at | 26.6  | 9.1   | 2.3   | 9.2   | 5.4   | 9.6   | 4.4   | 11.5  | 0.500807498  | 11.8    | 7.725   | 4.075  | 1.527508091 | 0.7701   | -1.183 |
| 162211_r_at | 20.1  | 25.6  | 20.8  | 4.3   | 20.7  | 51.6  | 3.3   | 20.2  | 0.601330377  | 17.7    | 23.95   | 6.25   | 0.739039666 | 0.8841   | 1.114  |
| 162212_at   | 3.3   | 3.9   | 2.9   | 9.9   | 10.5  | 3.3   | 6.4   | 8.3   | 0.380493921  | 5       | 7.125   | 2.125  | 0.701754386 | 0.313    | 1.511  |
| 162213_i_at | 117.3 | 57.1  | 59.1  | 102   | 82.4  | 156.1 | 100   | 98.5  | 0.295950137  | 83.875  | 109.25  | 25.375 | 0.767734554 | 0.2596   | 1.331  |
| 162214_r_at | 41.2  | 38    | 22.9  | 5.3   | 7.9   | 72.1  | 16.8  | 26.9  | 0.814728038  | 26.85   | 30.925  | 4.075  | 0.868229588 | 0.9086   | 1.083  |
| 162215_f_at | 11.5  | 8.6   | 2.6   | 12.1  | 10.2  | 22.6  | 2.5   | 23.9  | 0.334623752  | 8.7     | 14.8    | 6.1    | 0.587837838 | 0.5761   | 1.452  |
| 162216_i_at | 10.4  | 9.2   | 3.7   | 9.9   | 3.2   | 45    | 13.8  | 8.9   | 0.389667415  | 8.3     | 17.725  | 9.425  | 0.468265162 | 0.5227   | 1.501  |
| 162217_r_at | 2.7   | 18.3  | 6.5   | 1.8   | 11.1  | 7.5   | 5.5   | 33.4  | 0.390512109  | 7.325   | 14.375  | 7.05   | 0.509565217 | 0.2494   | 2.294  |
| 162218_f_at | 262.8 | 258.3 | 187.4 | 180.4 | 229.5 | 315.5 | 207   | 161.9 | 0.878997138  | 222.225 | 228.475 | 6.25   | 0.972644709 | 0.938    | 1.014  |
| 162219_f_at | 71.9  | 132.9 | 98    | 138.9 | 97.4  | 114.8 | 140.7 | 120.6 | 0.678940627  | 110.425 | 118.375 | 7.95   | 0.932840549 | 0.601    | 1.099  |
| 162220_r_at | 15.4  | 30.7  | 56.9  | 25.3  | 20.7  | 15.9  | 31.6  | 16.8  | 0.321518462  | 32.075  | 21.25   | 10.825 | 1.509411765 | 0.3165   | -1.406 |
| 162221_i_at | 82.2  | 122.6 | 111.5 | 116.1 | 102.9 | 151.1 | 127.9 | 117.1 | 0.26526211   | 108.1   | 124.75  | 16.65  | 0.866533066 | 0.2747   | 1.156  |
| 162222_r_at | 14.7  | 6.2   | 6.1   | 6.7   | 14.7  | 25.6  | 6     | 18.7  | 0.156327291  | 8.425   | 16.25   | 7.825  | 0.518461538 | 0.1601   | 1.832  |
| 162223_f_at | 6.2   | 5.2   | 27.4  | 5.9   | 4     | 10.4  | 7.4   | 4.2   | 0.458959148  | 11.175  | 6.5     | 4.675  | 1.719230769 | 0.4724   | -1.415 |



|             |        |        |        |        |        |        |        |        |             |          |          |         |             |         |        |
|-------------|--------|--------|--------|--------|--------|--------|--------|--------|-------------|----------|----------|---------|-------------|---------|--------|
| 162224_r_at | 53.7   | 16     | 23.8   | 48.3   | 38.2   | 80.2   | 31.6   | 40.2   | 0.432724979 | 35.45    | 47.55    | 12.1    | 0.74553102  | 0.3715  | 1.407  |
| 162225_f_at | 138.8  | 138.3  | 93.8   | 100.7  | 121.1  | 156.1  | 60.3   | 99.6   | 0.727477888 | 117.9    | 109.275  | 8.625   | 1.078929307 | 0.6245  | -1.124 |
| 162226_r_at | 80.8   | 49.6   | 83.9   | 77.6   | 56.1   | 92.2   | 82.9   | 71.2   | 0.820822796 | 72.975   | 75.6     | 2.625   | 0.965277778 | 0.8213  | 1.039  |
| 162227_r_at | 767.7  | 617.5  | 580.5  | 534.4  | 434.3  | 737.4  | 614.4  | 595.7  | 0.725318712 | 625.025  | 595.45   | 29.575  | 1.049668318 | 0.6878  | -1.058 |
| 162228_f_at | 111.6  | 97.5   | 111.6  | 96.8   | 115.6  | 71.3   | 79.3   | 113.5  | 0.483882754 | 104.375  | 94.925   | 9.45    | 1.099552278 | 0.4092  | -1.122 |
| 162229_at   | 9.1    | 10.9   | 9.4    | 9.6    | 8.4    | 15.2   | 9      | 9.9    | 0.619633348 | 9.75     | 10.625   | 0.875   | 0.917647059 | 0.6964  | 1.059  |
| 162230_r_at | 4.2    | 7      | 5.1    | 5.9    | 1.2    | 9.4    | 4.4    | 1.4    | 0.513565004 | 5.55     | 4.1      | 1.45    | 1.353658537 | 0.2514  | -1.895 |
| 162231_r_at | 53.1   | 65.8   | 8.9    | 38.2   | 27.6   | 32.9   | 10.1   | 33.9   | 0.313668168 | 41.5     | 26.125   | 15.375  | 1.588516746 | 0.5523  | -1.4   |
| 162232_r_at | 13.6   | 33.3   | 12     | 14.5   | 5.7    | 16     | 15.8   | 8.4    | 0.283430816 | 18.35    | 11.475   | 6.875   | 1.59912854  | 0.2221  | -1.599 |
| 162233_r_at | 11.9   | 10.6   | 12.8   | 4.3    | 10.8   | 21.8   | 13.6   | 1.3    | 0.691541147 | 9.9      | 11.875   | 1.975   | 0.833684211 | 0.8573  | -1.135 |
| 162234_f_at | 149.1  | 174.8  | 169.1  | 156.5  | 128.4  | 176.3  | 135.9  | 185.3  | 0.7211961   | 162.375  | 156.475  | 5.9     | 1.037705704 | 0.6469  | -1.049 |
| 162235_f_at | 138.8  | 92.9   | 85.3   | 73.5   | 154.9  | 113.4  | 61.7   | 107.7  | 0.639463296 | 97.625   | 109.425  | 11.8    | 0.892163582 | 0.7102  | 1.096  |
| 162236_f_at | 401.2  | 325    | 295.1  | 381.9  | 313.2  | 359.2  | 252.5  | 347.5  | 0.377857895 | 350.8    | 318.1    | 32.7    | 1.102797862 | 0.3872  | -1.105 |
| 162237_f_at | 35.6   | 11     | 26.4   | 14.6   | 31.8   | 62.2   | 25.4   | 16.1   | 0.346232978 | 21.9     | 33.875   | 11.975  | 0.646494465 | 0.322   | 1.522  |
| 162238_r_at | 266.8  | 149.7  | 115.9  | 82.4   | 128.2  | 191.2  | 102.1  | 197.7  | 0.98207807  | 153.7    | 154.8    | 1.1     | 0.992894057 | 0.8325  | 1.067  |
| 162239_at   | 7.4    | 3.7    | 2.4    | 4.1    | 6.5    | 10.4   | 3.4    | 3.3    | 0.483008976 | 4.4      | 5.9      | 1.5     | 0.745762712 | 0.494   | 1.303  |
| 162240_r_at | 1.2    | 1.2    | 0.7    | 1.8    | 0.9    | 2.3    | 0.9    | 1      | 0.907475453 | 1.225    | 1.275    | 0.05    | 0.960784314 | 0.9798  | 1.008  |
| 162241_r_at | 8.1    | 8.7    | 5.4    | 9      | 2.8    | 11.1   | 10.4   | 2.1    | 0.663298149 | 7.8      | 6.6      | 1.2     | 1.181818182 | 0.4081  | -1.49  |
| 162242_at   | 3.4    | 2.4    | 3.3    | 16.6   | 3.8    | 10     | 1.9    | 1.7    | 0.619806737 | 6.425    | 4.35     | 2.075   | 1.477011494 | 0.6141  | -1.373 |
| 162243_f_at | 119.7  | 71.8   | 59.8   | 111.7  | 61.4   | 129.2  | 97.8   | 91.8   | 0.838727022 | 90.75    | 95.05    | 4.3     | 0.954760652 | 0.8219  | 1.055  |
| 162244_r_at | 25.8   | 5.2    | 26.9   | 9.9    | 18.8   | 55.2   | 17.1   | 25.1   | 0.299396297 | 16.95    | 29.05    | 12.1    | 0.583476764 | 0.2346  | 1.88   |
| 162245_f_at | 229.9  | 228.8  | 256.7  | 297    | 267    | 301.6  | 281.1  | 268.6  | 0.206259707 | 253.1    | 279.575  | 26.475  | 0.905302692 | 0.174   | 1.11   |
| 162246_r_at | 169.6  | 133.2  | 109.9  | 140.6  | 98.3   | 227.6  | 92.5   | 131.1  | 0.978820904 | 138.325  | 137.375  | 0.95    | 1.006915378 | 0.7874  | -1.065 |
| 162247_r_at | 305.6  | 190.1  | 199    | 224.8  | 192.7  | 290.4  | 213.1  | 247.9  | 0.862277273 | 229.875  | 236.025  | 6.15    | 0.973943438 | 0.8257  | 1.033  |
| 162248_f_at | 100.3  | 114.7  | 94.7   | 207.4  | 121.2  | 150    | 134.4  | 128.7  | 0.882999371 | 129.275  | 133.575  | 4.3     | 0.967808347 | 0.6711  | 1.086  |
| 162249_f_at | 76.4   | 59.3   | 103.6  | 143.1  | 88.6   | 68.2   | 87.6   | 105    | 0.697823483 | 95.6     | 87.35    | 8.25    | 1.094447624 | 0.83    | -1.048 |
| 162250_f_at | 108.7  | 115.1  | 69.7   | 96     | 73     | 135.3  | 80.8   | 32.6   | 0.506177564 | 97.375   | 80.425   | 16.95   | 1.210755362 | 0.3886  | -1.34  |
| 162251_f_at | 204.4  | 90     | 225.9  | 244.9  | 136.6  | 294.4  | 215.5  | 215.5  | 0.627958087 | 191.3    | 215.5    | 24.2    | 0.887703016 | 0.6079  | 1.164  |
| 162252_f_at | 60.7   | 79.4   | 42.6   | 64.6   | 48.1   | 84.3   | 53.2   | 46.4   | 0.754532611 | 61.825   | 58       | 3.825   | 1.065948276 | 0.7219  | -1.073 |
| 162253_i_at | 119.1  | 155    | 98.7   | 137.7  | 144.2  | 54.7   | 163    | 148.2  | 0.997251373 | 127.625  | 127.525  | 0.1     | 1.00078416  | 0.8097  | -1.071 |
| 162254_f_at | 8.8    | 6.1    | 7.4    | 22.9   | 15.8   | 7      | 4.8    | 21.9   | 0.853229686 | 11.3     | 12.375   | 1.075   | 0.913131313 | 0.9016  | 1.061  |
| 162255_s_at | 15.1   | 8.9    | 6.3    | 6.8    | 3.3    | 10.8   | 9.1    | 6.7    | 0.514912988 | 9.275    | 7.475    | 1.8     | 1.240802676 | 0.4849  | -1.275 |
| 162256_r_at | 589.4  | 659.2  | 417.6  | 563.9  | 685.7  | 783.3  | 406.2  | 435.4  | 0.857295602 | 557.525  | 577.65   | 20.125  | 0.965160564 | 0.9624  | -1.009 |
| 162257_i_at | 10.5   | 8.9    | 5      | 9.1    | 18.8   | 27.3   | 5.5    | 16.9   | 0.144503456 | 8.375    | 17.125   | 8.75    | 0.489051095 | 0.1644  | 1.829  |
| 162258_f_at | 27.3   | 22.2   | 24.5   | 9.6    | 43.8   | 79.4   | 28.4   | 91.8   | 0.070324776 | 20.9     | 60.85    | 39.95   | 0.343467543 | 0.02828 | 2.829  |
| 162259_f_at | 8.9    | 7      | 4.5    | 6.1    | 6.6    | 7      | 2.8    | 5.7    | 0.436455623 | 6.625    | 5.525    | 1.1     | 1.199095023 | 0.4397  | -1.237 |
| 162260_at   | 152.2  | 166.1  | 86.2   | 106.1  | 70.3   | 99.2   | 127.3  | 141.7  | 0.492100985 | 127.65   | 109.625  | 18.025  | 1.164424173 | 0.5131  | -1.164 |
| 162261_f_at | 120    | 82.8   | 81.7   | 107    | 102.8  | 154.1  | 126.3  | 117.1  | 0.107452711 | 97.875   | 125.075  | 27.2    | 0.782530482 | 0.09982 | 1.282  |
| 162262_f_at | 204.1  | 302.1  | 233.9  | 302.2  | 288.3  | 240.1  | 241.6  | 293.6  | 0.860317939 | 260.575  | 265.9    | 5.325   | 0.979973674 | 0.7985  | 1.03   |
| 162263_f_at | 1028.8 | 1304.8 | 1003.5 | 1308.1 | 1922.5 | 1039   | 1245   | 2106.6 | 0.206423669 | 1161.3   | 1578.275 | 416.975 | 0.73580333  | 0.1908  | 1.313  |
| 162264_s_at | 53.7   | 53.4   | 104.4  | 120    | 39.8   | 81.1   | 113.5  | 87.5   | 0.920394436 | 82.875   | 80.475   | 2.4     | 1.029822926 | 0.9299  | 1.029  |
| 162265_r_at | 92     | 67.3   | 63.1   | 68     | 56.6   | 130.3  | 39.9   | 81.9   | 0.837350899 | 72.6     | 77.175   | 4.575   | 0.940719145 | 0.9301  | -1.025 |
| 162266_f_at | 11.3   | 15.8   | 31.1   | 23     | 19.4   | 38     | 16.2   | 37.7   | 0.343017439 | 20.3     | 27.825   | 7.525   | 0.729559748 | 0.3536  | 1.37   |
| 162267_r_at | 90     | 61.9   | 89.1   | 64.4   | 36.5   | 137.1  | 77     | 99.4   | 0.646018778 | 76.35    | 87.5     | 11.15   | 0.872571429 | 0.8858  | 1.046  |
| 162268_at   | 33.2   | 18.6   | 29.5   | 51.6   | 13.1   | 111    | 57.9   | 49.5   | 0.317353038 | 33.225   | 57.875   | 24.65   | 0.574082073 | 0.4821  | 1.449  |
| 162269_at   | 115    | 45.3   | 170.7  | 159.9  | 203    | 209    | 134.9  | 139.2  | 0.215689882 | 122.725  | 171.525  | 48.8    | 0.715493368 | 0.2367  | 1.539  |
| 162270_r_at | 46.6   | 38.2   | 23.6   | 23.8   | 19.7   | 68.5   | 21.9   | 65.6   | 0.495158537 | 33.05    | 43.925   | 10.875  | 0.752418896 | 0.6799  | 1.179  |
| 162271_f_at | 68.9   | 37.8   | 10.7   | 27     | 44.8   | 41.2   | 16.2   | 53.5   | 0.854443149 | 36.1     | 38.925   | 2.825   | 0.927424534 | 0.703   | 1.208  |
| 162272_r_at | 185.9  | 141.2  | 115.4  | 125.1  | 130.4  | 216.4  | 142.9  | 151.1  | 0.488669274 | 141.9    | 160.2    | 18.3    | 0.88576779  | 0.4658  | 1.126  |
| 162273_at   | 111.3  | 39.6   | 102.4  | 80.3   | 78.9   | 111.9  | 96.7   | 63.7   | 0.826821448 | 83.4     | 87.8     | 4.4     | 0.949886105 | 0.7145  | 1.107  |
| 162274_f_at | 133.4  | 84.9   | 59.2   | 145    | 60.1   | 92.5   | 122.8  | 136.1  | 0.920445504 | 105.625  | 102.875  | 2.75    | 1.02673147  | 0.9694  | 1.011  |
| 162275_f_at | 287    | 176.9  | 153.1  | 200.5  | 200.8  | 248.2  | 195.8  | 160.5  | 0.932605782 | 204.375  | 201.325  | 3.05    | 1.015149634 | 0.9942  | -1.001 |
| 162276_i_at | 195.3  | 88.9   | 66     | 103.6  | 74.9   | 222.9  | 132.4  | 101.3  | 0.667054552 | 113.45   | 132.875  | 19.425  | 0.853809972 | 0.644   | 1.171  |
| 162277_r_at | 6.3    | 21     | 5.2    | 14.7   | 11.9   | 32.2   | 18.4   | 17.3   | 0.204372346 | 11.8     | 19.95    | 8.15    | 0.591478697 | 0.1637  | 1.861  |
| 162278_r_at | 88.7   | 50.7   | 46.1   | 46.7   | 25.4   | 93.9   | 48     | 38.9   | 0.732766518 | 58.05    | 51.55    | 6.5     | 1.126091174 | 0.5593  | -1.214 |
| 162279_f_at | 1100.5 | 1356.5 | 1150   | 1110.1 | 1563.3 | 1192.1 | 1108.4 | 1258.2 | 0.422827989 | 1179.275 | 1280.5   | 101.225 | 0.920948848 | 0.4156  | 1.081  |



|             |        |       |       |        |        |        |       |        |             |          |          |        |             |         |        |
|-------------|--------|-------|-------|--------|--------|--------|-------|--------|-------------|----------|----------|--------|-------------|---------|--------|
| 162280_f_at | 10.9   | 7.2   | 8     | 5.3    | 8.2    | 16.2   | 9.8   | 9.7    | 0.199750202 | 7.85     | 10.975   | 3.125  | 0.715261959 | 0.1608  | 1.396  |
| 162281_at   | 113.8  | 74    | 52.9  | 52.8   | 76.2   | 137.1  | 44.1  | 31.2   | 0.9663959   | 73.375   | 72.15    | 1.225  | 1.016978517 | 0.752   | -1.131 |
| 162282_f_at | 131.1  | 110.4 | 124.6 | 183.9  | 103.5  | 114.3  | 144.9 | 108.1  | 0.336891325 | 137.5    | 117.7    | 19.8   | 1.168224299 | 0.3149  | -1.156 |
| 162283_r_at | 20.3   | 22.5  | 11.5  | 14     | 13.9   | 26.6   | 20.6  | 3.3    | 0.869883209 | 17.075   | 16.1     | 0.975  | 1.060559006 | 0.6034  | -1.307 |
| 162284_r_at | 1166.6 | 1230  | 730.3 | 814.4  | 981    | 1376.4 | 721.3 | 739.2  | 0.880982779 | 985.325  | 954.475  | 30.85  | 1.032321433 | 0.8377  | -1.043 |
| 162285_r_at | 18.8   | 3     | 7.1   | 1.9    | 1.4    | 43.6   | 4.5   | 3.5    | 0.636868407 | 7.7      | 13.25    | 5.55   | 0.581132075 | 0.949   | 1.061  |
| 162286_r_at | 77.1   | 54.8  | 45.5  | 82.1   | 51.7   | 89.2   | 13.4  | 45.4   | 0.442496876 | 64.875   | 49.925   | 14.95  | 1.299449174 | 0.3478  | -1.539 |
| 162287_r_at | 122.4  | 77.2  | 110.6 | 99.4   | 175.2  | 199.6  | 70.6  | 134.7  | 0.231344515 | 102.4    | 145.025  | 42.625 | 0.706085158 | 0.2915  | 1.337  |
| 162288_f_at | 108.6  | 52.9  | 97.6  | 79.7   | 74.3   | 60.3   | 94.8  | 108.7  | 0.991744371 | 84.7     | 84.525   | 0.175  | 1.002070393 | 0.9702  | 1.008  |
| 162289_at   | 4.4    | 5.8   | 8     | 1.6    | 1.4    | 6.9    | 8.4   | 8.3    | 0.564524566 | 4.95     | 6.25     | 1.3    | 0.792       | 0.7402  | 1.21   |
| 162290_f_at | 188.9  | 93.8  | 116.7 | 136.6  | 127.2  | 142.8  | 137.2 | 95.3   | 0.730913173 | 134      | 125.625  | 8.375  | 1.066666667 | 0.8107  | -1.044 |
| 162291_r_at | 1.4    | 0.7   | 6.6   | 5.6    | 7.8    | 10.4   | 6.2   | 11.3   | 0.031490362 | 3.575    | 8.925    | 5.35   | 0.400560224 | 0.06588 | 3.593  |
| 162292_r_at | 980.9  | 853.5 | 873.1 | 948.9  | 969.7  | 1007.1 | 713.6 | 777.9  | 0.577955327 | 914.1    | 867.075  | 47.025 | 1.054234063 | 0.5198  | -1.064 |
| 162293_r_at | 131.6  | 92.4  | 51.1  | 84     | 78.5   | 105.8  | 125.3 | 118.9  | 0.414633454 | 89.775   | 107.125  | 17.35  | 0.838039673 | 0.3677  | 1.241  |
| 162294_f_at | 2      | 1.6   | 1.4   | 8.5    | 1.1    | 7.6    | 7.9   | 7.5    | 0.307093    | 3.375    | 6.025    | 2.65   | 0.560165975 | 0.3622  | 1.886  |
| 162295_at   | 6.8    | 10.4  | 1.1   | 1.9    | 2.3    | 3.5    | 8.5   | 5.5    | 0.970460567 | 5.05     | 4.95     | 0.1    | 1.02020202  | 0.7153  | 1.258  |
| 162296_at   | 29.5   | 81.1  | 51.9  | 106.9  | 78.8   | 119.2  | 37.5  | 76.6   | 0.668785249 | 67.35    | 78.025   | 10.675 | 0.863184877 | 0.6491  | 1.194  |
| 162297_s_at | 41.1   | 41.5  | 47.6  | 40.2   | 74.5   | 73     | 45.1  | 66.5   | 0.042914731 | 42.6     | 64.775   | 22.175 | 0.657661135 | 0.0173  | 1.494  |
| 162298_r_at | 7.7    | 1.3   | 0.3   | 4.4    | 0.1    | 1.6    | 0.6   | 2.2    | 0.265737127 | 3.425    | 1.125    | 2.3    | 3.044444444 | 0.3306  | -2.79  |
| 162299_f_at | 1143.4 | 1777  | 1086  | 1031.9 | 1373.8 | 951.5  | 962   | 1112.2 | 0.462417297 | 1259.575 | 1099.875 | 159.7  | 1.145198318 | 0.4515  | -1.13  |
| 162300_at   | 16.7   | 23.6  | 1.5   | 15.2   | 3      | 4.8    | 2.3   | 4      | 0.102398109 | 14.25    | 3.525    | 10.725 | 4.042553191 | 0.15    | -2.891 |
| 162301_f_at | 188.7  | 193.1 | 141.1 | 155.5  | 240.5  | 180.4  | 140.4 | 158    | 0.702678668 | 169.6    | 179.825  | 10.225 | 0.943139163 | 0.7492  | 1.047  |
| 162302_f_at | 312    | 350.8 | 199.4 | 290.8  | 284.3  | 244    | 193.2 | 196.9  | 0.187309534 | 288.25   | 229.6    | 58.65  | 1.255444251 | 0.2017  | -1.245 |
| 162303_f_at | 20.7   | 15.5  | 19.5  | 12.3   | 16.4   | 53.1   | 24.4  | 18.6   | 0.283767417 | 17       | 28.125   | 11.125 | 0.604444444 | 0.2092  | 1.502  |
| 162304_r_at | 37.5   | 41.8  | 15.4  | 27.9   | 9.3    | 22     | 21.2  | 14.8   | 0.096044629 | 30.65    | 16.825   | 13.825 | 1.821693908 | 0.09773 | -1.803 |
| 162305_f_at | 9.4    | 6.4   | 5.2   | 8.1    | 4.8    | 9.1    | 5.3   | 7.9    | 0.73058052  | 7.275    | 6.775    | 0.5    | 1.073800738 | 0.7103  | -1.082 |
| 162306_at   | 6.5    | 2     | 1.2   | 2.1    | 1.8    | 3.6    | 1.3   | 3      | 0.708909562 | 2.95     | 2.425    | 0.525  | 1.216494845 | 0.912   | -1.051 |
| 162307_at   | 20.3   | 37.5  | 10.4  | 19     | 6.4    | 16.4   | 12.7  | 14.6   | 0.204204779 | 21.8     | 12.525   | 9.275  | 1.740518962 | 0.182   | -1.664 |
| 162308_f_at | 144.4  | 127   | 97.6  | 150.2  | 114.4  | 173.2  | 111   | 148.9  | 0.722451569 | 129.8    | 136.875  | 7.075  | 0.948310502 | 0.7454  | 1.05   |
| 162309_at   | 24.1   | 3.4   | 4.1   | 7.8    | 16.4   | 17.8   | 3.2   | 7.1    | 0.839610264 | 9.85     | 11.125   | 1.275  | 0.885393258 | 0.7108  | 1.262  |
| 162310_r_at | 113.5  | 58.8  | 131.1 | 82.1   | 92     | 167    | 99.2  | 102.4  | 0.459090901 | 96.375   | 115.15   | 18.775 | 0.836951802 | 0.4212  | 1.214  |
| 162311_f_at | 578.6  | 458.9 | 479.2 | 521.9  | 458.8  | 584.3  | 519   | 531.2  | 0.723917253 | 509.65   | 523.325  | 13.675 | 0.973869011 | 0.7207  | 1.027  |
| 162312_f_at | 25.2   | 3.3   | 12.8  | 11     | 14.7   | 4.8    | 12.6  | 5.7    | 0.51643677  | 13.075   | 9.45     | 3.625  | 1.383597884 | 0.7011  | -1.227 |
| 162313_f_at | 123.2  | 153.1 | 105.1 | 127.8  | 135.4  | 149.2  | 86.3  | 99.8   | 0.610188717 | 127.3    | 117.675  | 9.625  | 1.081793074 | 0.5522  | -1.099 |
| 162314_at   | 57.8   | 57.6  | 60.6  | 65.3   | 70.7   | 93.8   | 61.6  | 103.7  | 0.107427596 | 60.325   | 82.45    | 22.125 | 0.731655549 | 0.05753 | 1.339  |
| 162315_f_at | 6      | 9.6   | 16.4  | 5.7    | 2.8    | 18.8   | 9.2   | 4.4    | 0.891672615 | 9.425    | 8.8      | 0.625  | 1.071022727 | 0.6487  | -1.261 |
| 162316_f_at | 34.9   | 24.8  | 23.8  | 75.6   | 29.3   | 31.7   | 94.1  | 52.3   | 0.556208639 | 39.775   | 51.85    | 12.075 | 0.767116683 | 0.5054  | 1.309  |
| 162317_r_at | 66.2   | 55.3  | 52.1  | 71.4   | 45.8   | 82.7   | 75.4  | 52.5   | 0.787492765 | 61.25    | 64.1     | 2.85   | 0.955538222 | 0.8851  | 1.024  |
| 162318_r_at | 18.4   | 12.2  | 26.9  | 27.6   | 14.8   | 49.1   | 35    | 2.9    | 0.723217949 | 21.275   | 25.45    | 4.175  | 0.835952849 | 0.7685  | -1.225 |
| 162319_i_at | 14     | 13.8  | 46.8  | 37.4   | 75.8   | 49.8   | 91.1  | 38.1   | 0.056027755 | 28       | 63.7     | 35.7   | 0.43956044  | 0.05185 | 2.493  |
| 162320_at   | 37.5   | 5.7   | 23.5  | 25.5   | 12.1   | 40.7   | 6.6   | 5.7    | 0.545653151 | 23.05    | 16.275   | 6.775  | 1.416282642 | 0.4578  | -1.623 |
| 162321_f_at | 24.8   | 54.9  | 90.6  | 54.5   | 24.4   | 102.6  | 17    | 97.2   | 0.883699576 | 56.2     | 60.3     | 4.1    | 0.932006633 | 0.8293  | -1.128 |
| 162322_r_at | 104.4  | 49    | 41.5  | 46.5   | 39.5   | 59.8   | 63.6  | 51.3   | 0.688583042 | 60.35    | 53.55    | 6.8    | 1.126984127 | 0.8018  | -1.064 |
| 162323_at   | 24.8   | 6.1   | 3.2   | 1.8    | 6.5    | 8.3    | 4.2   | 20.7   | 0.88914781  | 8.975    | 9.925    | 0.95   | 0.904282116 | 0.5412  | 1.532  |
| 162324_at   | 41.4   | 14    | 45    | 8.5    | 29.2   | 96.8   | 8.8   | 11.6   | 0.698441748 | 27.225   | 36.6     | 9.375  | 0.743852459 | 0.9258  | 1.068  |
| 162325_f_at | 107.1  | 96.4  | 56.7  | 69.3   | 96.6   | 171    | 36.5  | 115.9  | 0.493824524 | 82.375   | 105      | 22.625 | 0.78452381  | 0.7187  | 1.146  |
| 162326_at   | 171.9  | 187.6 | 171.8 | 270.5  | 189.1  | 271.6  | 241.1 | 232.5  | 0.303114341 | 200.45   | 233.575  | 33.125 | 0.858182597 | 0.2622  | 1.177  |
| 162327_f_at | 307.8  | 290.1 | 308.3 | 316    | 431.4  | 311.6  | 332.1 | 301.9  | 0.285240438 | 305.55   | 344.25   | 38.7   | 0.887581699 | 0.2357  | 1.116  |
| 162328_f_at | 132.2  | 110.9 | 71    | 124.5  | 91.9   | 149.8  | 104.1 | 112.7  | 0.796719353 | 109.65   | 114.625  | 4.975  | 0.956597601 | 0.7629  | 1.057  |
| 162329_r_at | 18.4   | 8.2   | 6     | 15.1   | 27.7   | 16.2   | 22.4  | 14.9   | 0.089829259 | 11.925   | 20.3     | 8.375  | 0.587438424 | 0.09227 | 1.82   |
| 162330_f_at | 181    | 84    | 144.2 | 148    | 116.4  | 179.6  | 182   | 112.4  | 0.775865437 | 139.3    | 147.6    | 8.3    | 0.943766938 | 0.7553  | 1.071  |
| 162331_f_at | 27.4   | 26.3  | 19.1  | 21.4   | 18.4   | 33     | 23    | 23.2   | 0.825047596 | 23.55    | 24.4     | 0.85   | 0.965163934 | 0.8692  | 1.026  |
| 162332_f_at | 25.8   | 11.9  | 37.5  | 54.7   | 63.4   | 29.7   | 45.7  | 35.3   | 0.383186016 | 32.475   | 43.525   | 11.05  | 0.746122918 | 0.3228  | 1.481  |
| 162333_r_at | 158.7  | 141.2 | 107.2 | 177    | 117.5  | 181    | 154.5 | 116.7  | 0.872769449 | 146.025  | 142.425  | 3.6    | 1.025276461 | 0.8705  | -1.026 |
| 162334_r_at | 61.1   | 30.6  | 19    | 21.4   | 29.3   | 64.5   | 7.7   | 30.4   | 0.997488566 | 33.025   | 32.975   | 0.05   | 1.0015163   | 0.7989  | -1.147 |
| 162335_at   | 50.9   | 34.2  | 28    | 36.3   | 19.3   | 55.6   | 38.9  | 16     | 0.659912998 | 37.35    | 32.45    | 4.9    | 1.151001541 | 0.4717  | -1.276 |



|             |        |       |       |       |        |        |       |       |             |         |          |         |             |         |        |
|-------------|--------|-------|-------|-------|--------|--------|-------|-------|-------------|---------|----------|---------|-------------|---------|--------|
| 162336_r_at | 36.3   | 21.3  | 12.4  | 12.9  | 16.5   | 40.8   | 22.9  | 26.4  | 0.464732968 | 20.725  | 26.65    | 5.925   | 0.777673546 | 0.3802  | 1.347  |
| 162337_f_at | 224.9  | 176   | 244   | 191.5 | 207.2  | 157    | 226.1 | 197.2 | 0.586246485 | 209.1   | 196.875  | 12.225  | 1.062095238 | 0.5929  | -1.063 |
| 162338_r_at | 756.8  | 661.4 | 682   | 751.3 | 600.9  | 902.8  | 628.2 | 662.7 | 0.856277896 | 712.875 | 698.65   | 14.225  | 1.020360696 | 0.757   | -1.032 |
| 162339_r_at | 55.8   | 66.7  | 25.4  | 38.7  | 41.8   | 89.7   | 57.4  | 23.1  | 0.720529714 | 46.65   | 53       | 6.35    | 0.880188679 | 0.8363  | 1.08   |
| 162340_r_at | 158.4  | 154.1 | 110.8 | 142.6 | 160.9  | 176.5  | 135.2 | 127.2 | 0.608241943 | 141.475 | 149.95   | 8.475   | 0.94348116  | 0.6155  | 1.061  |
| 162341_r_at | 814.1  | 390.7 | 648.4 | 794.5 | 349.6  | 640.1  | 518.7 | 650.6 | 0.352538839 | 661.925 | 539.75   | 122.175 | 1.226354794 | 0.4195  | -1.214 |
| 162342_at   | 17.6   | 26.9  | 10.9  | 25.7  | 18.9   | 15.5   | 37.8  | 10.2  | 0.965147382 | 20.275  | 20.6     | 0.325   | 0.984223301 | 0.907   | -1.043 |
| 162343_f_at | 399.2  | 629.6 | 351.3 | 354.9 | 466.1  | 352.9  | 267.7 | 438.1 | 0.53857235  | 433.75  | 381.2    | 52.55   | 1.137854145 | 0.5385  | -1.129 |
| 162344_at   | 7.7    | 4.9   | 11.7  | 3.5   | 6.7    | 36.6   | 3     | 5.1   | 0.517209786 | 6.95    | 12.85    | 5.9     | 0.540856031 | 0.7195  | 1.254  |
| 162345_at   | 23     | 14.3  | 5.8   | 4     | 2.7    | 27.8   | 10.7  | 3.6   | 0.939731076 | 11.775  | 11.2     | 0.575   | 1.051339286 | 0.7295  | -1.274 |
| 162346_f_at | 37.5   | 37.1  | 36.5  | 32.3  | 41.6   | 45     | 30.7  | 39.8  | 0.356982104 | 35.85   | 39.275   | 3.425   | 0.912794398 | 0.3928  | 1.086  |
| 162347_f_at | 1301.8 | 935.1 | 905.7 | 1105  | 1013.3 | 1240.7 | 988.3 | 932.2 | 0.877999799 | 1061.9  | 1043.625 | 18.275  | 1.017511079 | 0.9074  | 1.013  |
| 162348_r_at | 92.8   | 62.2  | 42.4  | 40    | 43.9   | 17.8   | 60    | 20.2  | 0.183969713 | 59.35   | 35.475   | 23.875  | 1.673009161 | 0.1503  | -1.793 |
| 162349_i_at | 34.5   | 18.6  | 13.9  | 35.1  | 23.8   | 51.7   | 23    | 26    | 0.54826517  | 25.525  | 31.125   | 5.6     | 0.820080321 | 0.4986  | 1.241  |
| 162350_at   | 180.1  | 155.4 | 162.1 | 191.5 | 156.2  | 199.1  | 175.4 | 173.5 | 0.765296153 | 172.275 | 176.05   | 3.775   | 0.978557228 | 0.7678  | 1.022  |
| 162351_f_at | 60.3   | 30.7  | 49.4  | 58.4  | 68.6   | 64.6   | 41.2  | 36.8  | 0.778502814 | 49.7    | 52.8     | 3.1     | 0.941287879 | 0.8038  | 1.059  |
| 162352_r_at | 1.6    | 2.2   | 1.9   | 2.2   | 0.7    | 1.8    | 1.6   | 1     | 0.065952737 | 1.975   | 1.275    | 0.7     | 1.549019608 | 0.07181 | -1.657 |
| 162353_at   | 128.2  | 86.6  | 121.3 | 97.8  | 91     | 175.8  | 93.6  | 115.8 | 0.653826702 | 108.475 | 119.05   | 10.575  | 0.911171777 | 0.7123  | 1.071  |
| 162354_f_at | 13.3   | 9.3   | 8.2   | 9.7   | 32.8   | 15     | 9.1   | 8.7   | 0.350534583 | 10.125  | 16.4     | 6.275   | 0.617378049 | 0.3258  | 1.415  |
| 162355_at   | 7.4    | 15    | 16.1  | 3     | 15     | 6.7    | 8.1   | 13.6  | 0.903496824 | 10.375  | 10.85    | 0.475   | 0.956221198 | 0.6892  | 1.203  |
| 162356_r_at | 690.7  | 552.1 | 464.8 | 462.3 | 456.8  | 697.8  | 363.2 | 440.1 | 0.579497869 | 542.475 | 489.475  | 53      | 1.108279279 | 0.5034  | -1.126 |
| 162357_at   | 24.2   | 4.7   | 13.1  | 19.3  | 14.4   | 21.9   | 10.2  | 19    | 0.839856365 | 15.325  | 16.375   | 1.05    | 0.935877863 | 0.6552  | 1.207  |
| 162358_i_at | 378.6  | 274.4 | 315.1 | 395.2 | 359.3  | 363.9  | 215.5 | 305.7 | 0.529761426 | 340.825 | 311.1    | 29.725  | 1.095548055 | 0.5191  | -1.107 |
| 162359_r_at | 177.9  | 98.9  | 121.8 | 89.4  | 56.8   | 158    | 112.4 | 79.4  | 0.517797398 | 122     | 101.65   | 20.35   | 1.200196754 | 0.4461  | -1.244 |
| 162360_f_at | 203.4  | 249.3 | 194.4 | 231.1 | 405.4  | 278    | 155.4 | 277.3 | 0.332065385 | 219.55  | 279.025  | 59.475  | 0.786847057 | 0.3936  | 1.208  |
| 162361_at   | 18.9   | 5.3   | 11.8  | 7.4   | 9.3    | 31.4   | 9.2   | 16.9  | 0.377965457 | 10.85   | 16.7     | 5.85    | 0.649700599 | 0.3455  | 1.511  |
| 162362_f_at | 21.3   | 23    | 20.3  | 23.4  | 19     | 31.4   | 27.5  | 43.8  | 0.200579431 | 22      | 30.425   | 8.425   | 0.723089565 | 0.1605  | 1.326  |
| 162363_at   | 18.6   | 25.8  | 55.7  | 24.4  | 11.5   | 48.3   | 21.4  | 28.3  | 0.753523947 | 31.125  | 27.375   | 3.75    | 1.136986301 | 0.6819  | -1.178 |
| 162364_f_at | 51.4   | 13.1  | 16.3  | 21.2  | 17.6   | 41     | 36.4  | 28.1  | 0.627302549 | 25.5    | 30.775   | 5.275   | 0.828594639 | 0.4467  | 1.334  |
| 162365_i_at | 489.3  | 216.2 | 428.3 | 302   | 172.9  | 463.7  | 319.8 | 269   | 0.56495552  | 358.95  | 306.35   | 52.6    | 1.171699037 | 0.5568  | -1.187 |
| 162366_r_at | 35.2   | 38.4  | 20.3  | 30.7  | 14.6   | 30.7   | 26.8  | 17.8  | 0.162997698 | 31.15   | 22.475   | 8.675   | 1.385984427 | 0.1773  | -1.408 |
| 162367_f_at | 21     | 3.8   | 4.1   | 2.9   | 11.3   | 7.7    | 1.7   | 4.9   | 0.762582    | 7.95    | 6.4      | 1.55    | 1.2421875   | 0.9167  | -1.069 |
| 162368_r_at | 4      | 3.7   | 7.9   | 3.6   | 2.9    | 10.8   | 14.6  | 2.3   | 0.426297771 | 4.8     | 7.65     | 2.85    | 0.62745098  | 0.6671  | 1.253  |
| 162369_f_at | 8.1    | 6.6   | 12.9  | 22.2  | 8.5    | 33.6   | 24.4  | 20.9  | 0.191268648 | 12.45   | 21.85    | 9.4     | 0.56979405  | 0.2098  | 1.75   |
| 162370_r_at | 143    | 269.9 | 110.4 | 192.8 | 258    | 280.5  | 69.4  | 165.6 | 0.817981634 | 179.025 | 193.375  | 14.35   | 0.925791855 | 0.9939  | 1.003  |
| 162371_r_at | 257.8  | 181.7 | 129.4 | 210   | 147.5  | 267.5  | 184.9 | 196.7 | 0.908081631 | 194.725 | 199.15   | 4.425   | 0.977780567 | 0.8792  | 1.031  |
| 162372_f_at | 16.1   | 13.8  | 11.2  | 20.2  | 12.1   | 12.4   | 11.2  | 12.7  | 0.189328246 | 15.325  | 12.1     | 3.225   | 1.266528926 | 0.1386  | -1.242 |
| 162373_r_at | 9.1    | 6.7   | 5.8   | 5.7   | 5.5    | 7.2    | 7.2   | 8.2   | 0.844082358 | 6.825   | 7.025    | 0.2     | 0.971530249 | 0.779   | 1.041  |
| 162374_r_at | 1.9    | 9.4   | 5.5   | 24    | 21.9   | 18.7   | 2.6   | 2.5   | 0.868424057 | 10.2    | 11.425   | 1.225   | 0.892778993 | 0.9681  | 1.034  |
| 162375_i_at | 2      | 2.4   | 0.8   | 2.3   | 0.6    | 1.6    | 11.4  | 1.6   | 0.506334041 | 1.875   | 3.8      | 1.925   | 0.493421053 | 0.8022  | 1.191  |
| 162376_r_at | 11.2   | 3.2   | 1.3   | 1     | 3.8    | 11.1   | 4.2   | 2.6   | 0.698492056 | 4.175   | 5.425    | 1.25    | 0.769585253 | 0.395   | 1.776  |
| 162377_f_at | 121.7  | 129.9 | 117.1 | 159.2 | 152.9  | 108.5  | 92.7  | 172.8 | 0.990999247 | 131.975 | 131.725  | 0.25    | 1.001897893 | 0.8787  | -1.026 |
| 162378_r_at | 8.6    | 3.2   | 2.6   | 0.2   | 7.7    | 8.6    | 9.9   | 2.2   | 0.209211085 | 3.65    | 7.1      | 3.45    | 0.514084507 | 0.2405  | 3.031  |
| 162379_r_at | 206.7  | 151.3 | 208.3 | 262.9 | 144.6  | 336.9  | 229.1 | 233.6 | 0.556092417 | 207.3   | 236.05   | 28.75   | 0.87820377  | 0.6295  | 1.111  |
| 162380_r_at | 183.3  | 151.7 | 55.6  | 92.5  | 90.4   | 137.9  | 55.5  | 116.1 | 0.56487827  | 120.775 | 99.975   | 20.8    | 1.208052013 | 0.6793  | -1.155 |
| 162381_f_at | 239.9  | 180   | 230.4 | 211.2 | 222.9  | 279.4  | 192.4 | 216.5 | 0.605256339 | 215.375 | 227.8    | 12.425  | 0.945456541 | 0.6199  | 1.054  |
| 162382_f_at | 16.6   | 83.7  | 64.5  | 82.1  | 67.8   | 72.6   | 88.7  | 89.2  | 0.346729463 | 61.725  | 79.575   | 17.85   | 0.775683318 | 0.329   | 1.517  |
| 162383_r_at | 287.9  | 202.9 | 178   | 233.3 | 177    | 294.1  | 195   | 244.2 | 0.955728488 | 225.525 | 227.575  | 2.05    | 0.990991981 | 0.9729  | 1.005  |
| 162384_f_at | 4.2    | 14.9  | 14.7  | 21.5  | 22.7   | 16     | 9.8   | 23.3  | 0.422291113 | 13.825  | 17.95    | 4.125   | 0.770194986 | 0.415   | 1.432  |
| 162385_i_at | 19.2   | 15.9  | 39    | 29.7  | 20.2   | 77.8   | 12.4  | 40.4  | 0.493780377 | 25.95   | 37.7     | 11.75   | 0.688328912 | 0.6712  | 1.222  |
| 162386_at   | 6      | 5.8   | 2.1   | 3.3   | 4.7    | 8.5    | 4.6   | 5.5   | 0.293009465 | 4.3     | 5.825    | 1.525   | 0.738197425 | 0.2683  | 1.424  |
| 162387_f_at | 105.8  | 114.9 | 103.7 | 127.1 | 110.6  | 127.9  | 148.5 | 129.2 | 0.142455289 | 112.875 | 129.05   | 16.175  | 0.874660984 | 0.1332  | 1.141  |
| 162388_r_at | 671.7  | 843.3 | 504.8 | 415.2 | 661    | 642.4  | 425.7 | 473.7 | 0.624883421 | 608.75  | 550.7    | 58.05   | 1.105411295 | 0.6833  | -1.085 |
| 162389_at   | 10.3   | 10.4  | 11.3  | 8.2   | 6.1    | 6.6    | 9.8   | 7.1   | 0.047742233 | 10.05   | 7.4      | 2.65    | 1.358108108 | 0.0429  | -1.375 |
| 162390_r_at | 1.8    | 0.8   | 0.8   | 5.2   | 0.8    | 1.1    | 2.2   | 2.4   | 0.663585931 | 2.15    | 1.625    | 0.525   | 1.323076923 | 0.8961  | -1.073 |
| 162391_r_at | 1.5    | 1.4   | 0.6   | 0.7   | 0.6    | 1.3    | 0.7   | 0.8   | 0.505470625 | 1.05    | 0.85     | 0.2     | 1.235294118 | 0.5216  | -1.22  |



|             |        |        |        |        |        |        |        |        |             |          |          |         |             |          |        |
|-------------|--------|--------|--------|--------|--------|--------|--------|--------|-------------|----------|----------|---------|-------------|----------|--------|
| 162392_r_at | 427.7  | 291.5  | 150.5  | 290.2  | 206.5  | 378    | 215.8  | 236.5  | 0.674418491 | 289.975  | 259.2    | 30.775  | 1.11873071  | 0.7718   | -1.081 |
| 162393_at   | 25.3   | 31.7   | 18.5   | 29.9   | 30.8   | 53.6   | 31.6   | 27.8   | 0.215026352 | 26.35    | 35.95    | 9.6     | 0.732962448 | 0.1711   | 1.344  |
| 162394_r_at | 111    | 68.8   | 57.6   | 72.4   | 61.7   | 130.1  | 61.8   | 57     | 0.992762637 | 77.45    | 77.65    | 0.2     | 0.99742434  | 0.9056   | -1.03  |
| 162395_r_at | 23.4   | 1.1    | 1.3    | 3      | 1.8    | 21.5   | 3.8    | 0.5    | 0.968622861 | 7.2      | 6.9      | 0.3     | 1.043478261 | 0.9416   | -1.084 |
| 162396_at   | 16.2   | 7.8    | 28.3   | 21.5   | 18.3   | 44.8   | 5.4    | 7.5    | 0.95873797  | 18.45    | 19       | 0.55    | 0.971052632 | 0.7137   | -1.235 |
| 162397_r_at | 192.2  | 93.8   | 133.3  | 171.1  | 123.1  | 193.6  | 122    | 184.2  | 0.788835656 | 147.6    | 155.725  | 8.125   | 0.947824691 | 0.7547   | 1.068  |
| 162398_at   | 96.5   | 49.2   | 27.8   | 69.6   | 99.8   | 102    | 82.9   | 48.4   | 0.286442633 | 60.775   | 83.275   | 22.5    | 0.729810868 | 0.2846   | 1.452  |
| 162399_f_at | 460.1  | 630.9  | 886.8  | 1058.4 | 734.1  | 516    | 677.9  | 821.6  | 0.650868938 | 759.05   | 687.4    | 71.65   | 1.104233343 | 0.7708   | -1.066 |
| 162400_f_at | 99.2   | 78.7   | 42.6   | 72.1   | 62     | 106.6  | 93.2   | 75     | 0.497735515 | 73.15    | 84.2     | 11.05   | 0.868764846 | 0.4745   | 1.178  |
| 162401_f_at | 223.7  | 149.3  | 193.8  | 183.3  | 223.6  | 184.7  | 171.4  | 179.2  | 0.91300224  | 187.525  | 189.725  | 2.2     | 0.988404269 | 0.874    | 1.017  |
| 162402_r_at | 51.5   | 14.4   | 27.2   | 36.3   | 16.5   | 42.8   | 23.7   | 19.2   | 0.515795502 | 32.35    | 25.55    | 6.8     | 1.266144814 | 0.5663   | -1.23  |
| 162403_at   | 75     | 68.7   | 49.5   | 43     | 50.4   | 194    | 60.7   | 54.9   | 0.442958643 | 59.05    | 90       | 30.95   | 0.656111111 | 0.4578   | 1.313  |
| 162404_i_at | 45.8   | 37.5   | 39.6   | 64     | 24.3   | 77.5   | 23     | 34.8   | 0.653370189 | 46.725   | 39.9     | 6.825   | 1.171052632 | 0.418    | -1.304 |
| 162405_at   | 48.8   | 21.9   | 19.6   | 24.9   | 26.7   | 49.8   | 6.1    | 30.4   | 0.962596686 | 28.8     | 28.25    | 0.55    | 1.019469027 | 0.7154   | -1.21  |
| 162406_f_at | 4.7    | 4.5    | 2.7    | 20.3   | 3.7    | 2.5    | 6.5    | 7.8    | 0.537134735 | 8.05     | 5.125    | 2.925   | 1.570731707 | 0.6607   | -1.263 |
| 162407_at   | 214.3  | 219    | 182.3  | 131.5  | 102.4  | 196.6  | 141.4  | 163.1  | 0.250302484 | 186.775  | 150.875  | 35.9    | 1.237945319 | 0.2678   | -1.248 |
| 162408_f_at | 8.2    | 3.5    | 2.5    | 3.5    | 2.6    | 3.5    | 4.7    | 1.8    | 0.417306327 | 4.425    | 3.15     | 1.275   | 1.404761905 | 0.4025   | -1.346 |
| 162409_r_at | 12.7   | 23.5   | 21.1   | 14.9   | 24.5   | 32.6   | 24.2   | 26     | 0.036351142 | 18.05    | 26.825   | 8.775   | 0.672879776 | 0.04053  | 1.519  |
| 162410_s_at | 6.3    | 6.5    | 5.6    | 4.2    | 5.3    | 4.8    | 3.3    | 5.1    | 0.189002533 | 5.65     | 4.625    | 1.025   | 1.221621622 | 0.2151   | -1.226 |
| 162411_f_at | 4.5    | 1.4    | 2.2    | 2.1    | 2.8    | 6      | 1.3    | 2.4    | 0.654795033 | 2.55     | 3.125    | 0.575   | 0.816       | 0.7317   | 1.153  |
| 162412_r_at | 15.5   | 8.5    | 3.6    | 8.7    | 2.5    | 12.1   | 9.8    | 17.9   | 0.722427897 | 9.075    | 10.575   | 1.5     | 0.858156028 | 0.9059   | 1.066  |
| 162413_r_at | 23.1   | 12.4   | 18.2   | 7.6    | 20.5   | 34.8   | 15.9   | 7.4    | 0.545174099 | 15.325   | 19.65    | 4.325   | 0.779898219 | 0.6592   | 1.205  |
| 162414_f_at | 194.2  | 141.9  | 149.1  | 177.3  | 217.2  | 139    | 211.6  | 221    | 0.227805386 | 165.625  | 197.2    | 31.575  | 0.839883367 | 0.2611   | 1.18   |
| 162415_f_at | 416.9  | 419.3  | 337.5  | 427.2  | 360.1  | 548.6  | 361.3  | 358.5  | 0.899931494 | 400.225  | 407.125  | 6.9     | 0.983051888 | 0.976    | 1.004  |
| 162416_at   | 10.1   | 5.6    | 8.2    | 5.4    | 1.2    | 5.6    | 6.2    | 4      | 0.100393212 | 7.325    | 4.25     | 3.075   | 1.723529412 | 0.1446   | -1.988 |
| 162417_at   | 138.7  | 82.3   | 84.9   | 93.8   | 94.2   | 147.8  | 86.9   | 113.9  | 0.590008849 | 99.925   | 110.7    | 10.775  | 0.90266486  | 0.5606   | 1.109  |
| 162418_r_at | 183.1  | 111.9  | 52.9   | 168.9  | 88.3   | 172.5  | 168.9  | 111.7  | 0.871912807 | 129.2    | 135.35   | 6.15    | 0.954562246 | 0.7424   | 1.119  |
| 162419_r_at | 12.1   | 10.1   | 2.6    | 4.5    | 6.4    | 19     | 18.6   | 13.7   | 0.10651108  | 7.325    | 14.425   | 7.1     | 0.50779896  | 0.1305   | 2.161  |
| 162420_r_at | 176.2  | 271.8  | 246.6  | 205.5  | 324    | 301    | 236.9  | 317.1  | 0.053745095 | 225.025  | 294.75   | 69.725  | 0.763443596 | 0.0616   | 1.318  |
| 162421_r_at | 1.2    | 2.5    | 0.8    | 0.7    | 1      | 2.2    | 0.7    | 2.3    | 0.68271327  | 1.3      | 1.55     | 0.25    | 0.838709677 | 0.6324   | 1.232  |
| 162422_r_at | 767.7  | 475.7  | 582.8  | 508.2  | 679.2  | 952.4  | 331.6  | 355.5  | 0.981705    | 583.6    | 579.675  | 3.925   | 1.006771035 | 0.7629   | -1.091 |
| 162423_f_at | 6.6    | 5.9    | 16.7   | 19.7   | 15.2   | 10.1   | 24.6   | 8.4    | 0.658406506 | 12.225   | 14.575   | 2.35    | 0.838765009 | 0.5851   | 1.254  |
| 162424_f_at | 813.9  | 788.4  | 936.3  | 1328.5 | 1116.2 | 727.4  | 1282.1 | 1236.5 | 0.511389224 | 966.775  | 1090.55  | 123.775 | 0.886502224 | 0.5245   | 1.127  |
| 162425_f_at | 57.4   | 34.1   | 37.4   | 40     | 61.4   | 45.1   | 38.7   | 56.2   | 0.309901058 | 42.225   | 50.35    | 8.125   | 0.838629593 | 0.2874   | 1.198  |
| 162426_f_at | 1488.8 | 1485   | 1634.1 | 1556.4 | 1329.8 | 1182.5 | 1180.2 | 1229   | 0.000764411 | 1541.075 | 1230.375 | 310.7   | 1.252524637 | 0.000754 | -1.253 |
| 162427_r_at | 14.9   | 11.3   | 8      | 14.8   | 8.4    | 24.5   | 7.9    | 12.7   | 0.801774524 | 12.25    | 13.375   | 1.125   | 0.91588785  | 0.9796   | 1.008  |
| 162428_i_at | 1025   | 653.4  | 805.8  | 763.2  | 775.1  | 1103.2 | 1011.6 | 564.4  | 0.734187338 | 811.85   | 863.575  | 51.725  | 0.940103639 | 0.8188   | 1.043  |
| 162429_r_at | 156.1  | 87.2   | 51.6   | 118.5  | 129.3  | 121.8  | 134    | 106.3  | 0.452863587 | 103.35   | 122.85   | 19.5    | 0.841269841 | 0.3462   | 1.281  |
| 162430_at   | 34.2   | 52.2   | 51.2   | 38.6   | 66.7   | 42.4   | 60.1   | 53.1   | 0.145958888 | 44.05    | 55.575   | 11.525  | 0.792622582 | 0.1527   | 1.264  |
| 162431_at   | 33.6   | 45.6   | 55.2   | 57.6   | 36.7   | 38.8   | 65.3   | 44.6   | 0.852888345 | 48       | 46.35    | 1.65    | 1.035598706 | 0.8288   | -1.041 |
| 162432_f_at | 80.1   | 48.2   | 61.1   | 61.5   | 41.5   | 21.7   | 49.6   | 61.2   | 0.122139065 | 62.725   | 43.5     | 19.225  | 1.441954023 | 0.142    | -1.518 |
| 162433_f_at | 21.6   | 41.7   | 27.6   | 44.8   | 38.3   | 61.8   | 42.1   | 32.1   | 0.299750748 | 33.925   | 43.575   | 9.65    | 0.778542742 | 0.2786   | 1.302  |
| 162434_i_at | 13     | 2.3    | 1.2    | 10.4   | 5.1    | 19.6   | 11.6   | 1.8    | 0.590040011 | 6.725    | 9.525    | 2.8     | 0.706036745 | 0.607    | 1.525  |
| 162435_f_at | 245.4  | 187.5  | 159.2  | 187.1  | 156.9  | 285.4  | 186.6  | 171.1  | 0.885353421 | 194.8    | 200      | 5.2     | 0.974       | 0.9495   | 1.011  |
| 162436_at   | 20.6   | 17.4   | 10.5   | 38.6   | 11.2   | 27.4   | 11.6   | 34.3   | 0.940352176 | 21.775   | 21.125   | 0.65    | 1.030769231 | 0.911    | -1.047 |
| 162437_at   | 3.9    | 2.5    | 9.1    | 15.6   | 7.6    | 17.2   | 7.3    | 2.9    | 0.825430514 | 7.775    | 8.75     | 0.975   | 0.888571429 | 0.7633   | 1.189  |
| 162438_f_at | 105    | 90.2   | 107    | 128.8  | 87.6   | 152.1  | 125.4  | 112.6  | 0.488847171 | 107.75   | 119.425  | 11.675  | 0.9022399   | 0.5293   | 1.095  |
| 162439_at   | 3.4    | 17.6   | 11.9   | 20.3   | 10.3   | 11.6   | 1.5    | 11.2   | 0.341861448 | 13.3     | 8.65     | 4.65    | 1.537572254 | 0.4645   | -1.658 |
| 162440_r_at | 1848.9 | 1392.3 | 1251.4 | 1457.9 | 1380.5 | 1710.5 | 1309.1 | 1654.4 | 0.877977543 | 1487.625 | 1513.625 | 26      | 0.982822694 | 0.8467   | 1.022  |
| 162441_i_at | 17.3   | 14.3   | 11.8   | 35.4   | 23.3   | 21.6   | 13.5   | 24.7   | 0.864015814 | 19.7     | 20.775   | 1.075   | 0.948255114 | 0.6783   | 1.128  |
| 162442_r_at | 143.1  | 146.2  | 144.3  | 142.9  | 116.2  | 159.4  | 138.1  | 129.1  | 0.422890868 | 144.125  | 135.7    | 8.425   | 1.062085483 | 0.3519   | -1.069 |
| 162443_at   | 8.4    | 5      | 7.8    | 7.8    | 7.5    | 11     | 5.4    | 7.6    | 0.670548904 | 7.25     | 7.875    | 0.625   | 0.920634921 | 0.7126   | 1.075  |
| 162444_r_at | 51     | 43.3   | 44.2   | 51.1   | 43.1   | 121.8  | 50.6   | 52.4   | 0.36600733  | 47.4     | 66.975   | 19.575  | 0.707726764 | 0.3228   | 1.293  |
| 162445_at   | 31.1   | 16.2   | 22.6   | 4.6    | 24.6   | 46.7   | 21.3   | 12.6   | 0.435972277 | 18.625   | 26.3     | 7.675   | 0.708174905 | 0.4059   | 1.562  |
| 162446_at   | 35.6   | 38     | 29.3   | 17.2   | 26.8   | 34.1   | 33.6   | 28.5   | 0.891835246 | 30.025   | 30.75    | 0.725   | 0.976422764 | 0.7563   | 1.063  |
| 162447_f_at | 281.2  | 225.2  | 198.9  | 222.8  | 216.6  | 348.6  | 183.8  | 255.7  | 0.652624838 | 232.025  | 251.175  | 19.15   | 0.923758336 | 0.7169   | 1.061  |



|             |        |        |        |        |        |        |        |        |             |          |          |         |             |         |        |
|-------------|--------|--------|--------|--------|--------|--------|--------|--------|-------------|----------|----------|---------|-------------|---------|--------|
| 162448_f_at | 11.1   | 17.9   | 7.4    | 27.7   | 37.4   | 21.8   | 67.8   | 42.8   | 0.06265876  | 16.025   | 42.45    | 26.425  | 0.377502945 | 0.03344 | 2.768  |
| 162449_f_at | 23.2   | 22.5   | 1.4    | 19.5   | 20.4   | 33.6   | 10.4   | 27     | 0.418570997 | 16.65    | 22.85    | 6.2     | 0.728665208 | 0.4075  | 1.921  |
| 162450_f_at | 5.1    | 5.3    | 4.1    | 4.8    | 1.7    | 5.8    | 3      | 8.2    | 0.925143859 | 4.825    | 4.675    | 0.15    | 1.032085561 | 0.6012  | -1.217 |
| 162451_r_at | 1.5    | 0.9    | 0.3    | 2.2    | 4.9    | 1.1    | 0.2    | 9.8    | 0.295219857 | 1.225    | 4        | 2.775   | 0.30625     | 0.6013  | 1.749  |
| 162452_at   | 95.3   | 60     | 70.6   | 81.4   | 64.8   | 113.9  | 53.5   | 74.1   | 0.987500132 | 76.825   | 76.575   | 0.25    | 1.003264773 | 0.8824  | -1.03  |
| 162453_at   | 4.7    | 7.6    | 10.9   | 11     | 9.4    | 19.9   | 14.4   | 15.8   | 0.058538421 | 8.55     | 14.875   | 6.325   | 0.574789916 | 0.0655  | 1.779  |
| 162454_f_at | 12.4   | 30.8   | 7.1    | 9.3    | 5.7    | 19.8   | 5.6    | 6.8    | 0.435836174 | 14.9     | 9.475    | 5.425   | 1.572559367 | 0.3496  | -1.561 |
| 162455_f_at | 164.6  | 155.8  | 237.1  | 232.6  | 258.6  | 222.7  | 239.2  | 276.4  | 0.094172436 | 197.525  | 249.225  | 51.7    | 0.792556926 | 0.0859  | 1.281  |
| 162456_f_at | 23.1   | 13.6   | 12.8   | 16.6   | 12.1   | 22.2   | 10.9   | 21.9   | 0.950455637 | 16.525   | 16.775   | 0.25    | 0.98509687  | 0.9671  | 1.01   |
| 162457_f_at | 3008.6 | 6529   | 3547.2 | 2510.9 | 5261.3 | 4644.1 | 1862.1 | 2803   | 0.837963982 | 3898.925 | 3642.625 | 256.3   | 1.070361347 | 0.8112  | -1.082 |
| 162458_i_at | 281.7  | 252.7  | 249.4  | 338.2  | 231.1  | 438.1  | 358.7  | 334.3  | 0.26898647  | 280.5    | 340.55   | 60.05   | 0.823667597 | 0.2883  | 1.192  |
| 162459_f_at | 1400.1 | 1561.6 | 1789.5 | 2296   | 1481.2 | 1365.5 | 2354.2 | 2799.2 | 0.576184886 | 1761.8   | 2000.025 | 238.225 | 0.880888989 | 0.6473  | 1.104  |
| 162460_f_at | 211.3  | 206.8  | 167.5  | 192.1  | 232.1  | 272.7  | 161.4  | 229.8  | 0.303014558 | 194.425  | 224      | 29.575  | 0.86796875  | 0.3343  | 1.137  |
| 162461_at   | 100.3  | 40.3   | 55.2   | 62.9   | 48.5   | 96.9   | 50.2   | 62.3   | 0.991005014 | 64.675   | 64.475   | 0.2     | 1.003101978 | 0.9636  | 1.012  |
| 162462_r_at | 31.3   | 51.5   | 45.9   | 76.8   | 90     | 20.7   | 79.9   | 51.2   | 0.64028197  | 51.375   | 60.45    | 9.075   | 0.849875931 | 0.8523  | 1.077  |
| 162463_at   | 155.6  | 123.5  | 116.1  | 148.7  | 136.2  | 176.2  | 141.7  | 156.8  | 0.248522066 | 135.975  | 152.725  | 16.75   | 0.890325749 | 0.2419  | 1.126  |
| 162464_f_at | 216    | 170.8  | 146.3  | 144.4  | 121.2  | 211.2  | 166.3  | 166.6  | 0.906183961 | 169.375  | 166.325  | 3.05    | 1.018337592 | 0.8788  | -1.024 |
| 162465_i_at | 7.4    | 3.1    | 20.2   | 5.4    | 5.2    | 25.6   | 24.9   | 1.4    | 0.512713886 | 9.025    | 14.275   | 5.25    | 0.632224168 | 0.8544  | 1.166  |
| 162466_at   | 308.5  | 422.9  | 354.9  | 361.6  | 493    | 360    | 368.4  | 388    | 0.339910761 | 361.975  | 402.35   | 40.375  | 0.899652044 | 0.3244  | 1.11   |
| 162467_r_at | 178    | 21.9   | 105.2  | 15.8   | 73.1   | 28.6   | 60.7   | 78.4   | 0.646701105 | 80.225   | 60.2     | 20.025  | 1.332641196 | 0.8712  | 1.113  |
| 162468_at   | 658.9  | 621.3  | 658.5  | 706.2  | 585    | 614.1  | 594.5  | 566.7  | 0.017709107 | 661.225  | 590.075  | 71.15   | 1.120577893 | 0.0108  | -1.12  |
| 162469_r_at | 2249.7 | 1383.5 | 1707.9 | 1590.9 | 1445.3 | 2087.9 | 1858.7 | 1446   | 0.926407959 | 1733     | 1709.475 | 23.525  | 1.013761535 | 0.9419  | -1.011 |
| 162470_at   | 314.8  | 237.2  | 229.2  | 263    | 401.1  | 312.9  | 214.3  | 245.4  | 0.515265288 | 261.05   | 293.425  | 32.375  | 0.889665161 | 0.5607  | 1.1    |
| 162471_i_at | 13.3   | 24.6   | 23.5   | 9.7    | 13.8   | 33.7   | 17.2   | 12.9   | 0.799677885 | 17.775   | 19.4     | 1.625   | 0.916237113 | 0.809   | 1.083  |
| 162472_f_at | 28.6   | 32.8   | 31.7   | 23.6   | 31.5   | 54.2   | 35.3   | 29.2   | 0.242638048 | 29.175   | 37.55    | 8.375   | 0.776964048 | 0.1925  | 1.258  |
| 162473_r_at | 7.3    | 2.9    | 2.6    | 4.7    | 2.1    | 10.8   | 3.6    | 4.2    | 0.732806796 | 4.375    | 5.175    | 0.8     | 0.845410628 | 0.8793  | 1.068  |
| 162474_f_at | 12.9   | 9.5    | 10.4   | 12.8   | 14.3   | 15.2   | 24.8   | 6.7    | 0.379946154 | 11.4     | 15.25    | 3.85    | 0.747540984 | 0.5152  | 1.215  |
| 162475_f_at | 7.3    | 67.2   | 27.8   | 29.1   | 90.8   | 62.4   | 40.2   | 24.2   | 0.303000613 | 32.85    | 54.4     | 21.55   | 0.603860294 | 0.2683  | 1.933  |
| 162476_r_at | 17.3   | 6.3    | 29.6   | 42.2   | 33.9   | 70.5   | 33.3   | 33.3   | 0.169870476 | 23.85    | 42.75    | 18.9    | 0.557894737 | 0.154   | 2.101  |
| 162477_r_at | 51.8   | 51     | 28.6   | 41.5   | 32.6   | 45.1   | 21.7   | 25.4   | 0.158761812 | 43.225   | 31.2     | 12.025  | 1.385416667 | 0.1586  | -1.404 |
| 162478_r_at | 23.8   | 26.7   | 9.3    | 18.1   | 24.7   | 57.3   | 17     | 26.6   | 0.28383926  | 19.475   | 31.4     | 11.925  | 0.62022293  | 0.2459  | 1.563  |
| 162479_f_at | 509.6  | 939.3  | 539.3  | 706.2  | 815.8  | 872.5  | 711.9  | 735.4  | 0.356358724 | 673.6    | 783.9    | 110.3   | 0.859293277 | 0.2725  | 1.196  |
| 162480_f_at | 8.4    | 8.3    | 5.3    | 6.7    | 7.7    | 9.9    | 27.5   | 4.7    | 0.380890134 | 7.175    | 12.45    | 5.275   | 0.576305221 | 0.4107  | 1.409  |
| 162481_f_at | 127.2  | 166.4  | 171.1  | 225.9  | 190.2  | 89.9   | 182.1  | 229.5  | 0.994158604 | 172.65   | 172.925  | 0.275   | 0.998409715 | 0.891   | -1.034 |
| 162482_at   | 1005.7 | 1056.7 | 1001.3 | 971.6  | 1023.9 | 1027.9 | 868.8  | 960.5  | 0.398689514 | 1008.825 | 970.275  | 38.55   | 1.039731004 | 0.3787  | -1.042 |
| 162483_f_at | 169    | 172.5  | 208.7  | 234.7  | 186.5  | 197.6  | 264.3  | 205.3  | 0.49029587  | 196.225  | 213.425  | 17.2    | 0.919409629 | 0.4747  | 1.088  |
| 162484_r_at | 103    | 67.8   | 63.2   | 87.6   | 22.8   | 120.4  | 32.7   | 61.5   | 0.426057783 | 80.4     | 59.35    | 21.05   | 1.354675653 | 0.2515  | -1.627 |
| 162485_at   | 18.8   | 11.7   | 0.7    | 2      | 11.6   | 20     | 3.4    | 16.7   | 0.44113987  | 8.3      | 12.925   | 4.625   | 0.642166344 | 0.3174  | 2.56   |
| 162486_f_at | 675.2  | 917.3  | 669.6  | 656.5  | 961.3  | 824.4  | 797.7  | 838.3  | 0.145271194 | 729.65   | 855.425  | 125.775 | 0.852967823 | 0.1131  | 1.181  |
| 162487_f_at | 378    | 274.7  | 282.2  | 293.2  | 247.7  | 445.1  | 306.9  | 304.8  | 0.70970412  | 307.025  | 326.125  | 19.1    | 0.941433499 | 0.7589  | 1.047  |
| 162488_at   | 27.5   | 40.6   | 21.5   | 27.5   | 42.7   | 39.4   | 19     | 25.3   | 0.750083178 | 29.275   | 31.6     | 2.325   | 0.926424051 | 0.8349  | 1.052  |
| 162489_i_at | 710.3  | 689.2  | 744.2  | 669.9  | 714.2  | 719.5  | 546    | 492.2  | 0.240157551 | 703.4    | 617.975  | 85.425  | 1.138233747 | 0.1986  | -1.153 |
| 162490_f_at | 87.9   | 66.1   | 87.2   | 66.2   | 107.5  | 121.5  | 89.2   | 78.9   | 0.102565288 | 76.85    | 99.275   | 22.425  | 0.774112314 | 0.09121 | 1.287  |
| 162491_f_at | 47.4   | 29     | 38     | 38.8   | 58.9   | 57.5   | 43.3   | 47.4   | 0.045527288 | 38.3     | 51.775   | 13.475  | 0.739739256 | 0.04905 | 1.362  |
| 162492_at   | 12.4   | 43     | 26.3   | 55.2   | 21.9   | 63.9   | 9.7    | 48.6   | 0.911613834 | 34.225   | 36.025   | 1.8     | 0.950034698 | 0.9424  | -1.041 |
| 162493_r_at | 110.9  | 128.4  | 98.5   | 83.5   | 88.5   | 166.2  | 93.3   | 131    | 0.516289106 | 105.325  | 119.75   | 14.425  | 0.87954071  | 0.5619  | 1.113  |
| 162494_at   | 48.7   | 26.7   | 25.1   | 40.8   | 24.4   | 25.6   | 43.5   | 34.7   | 0.66706582  | 35.325   | 32.05    | 3.275   | 1.102184087 | 0.6949  | -1.091 |
| 162495_r_at | 16.5   | 1.2    | 1.1    | 1.6    | 6.4    | 36.4   | 1.8    | 12.7   | 0.33779211  | 5.1      | 14.325   | 9.225   | 0.356020942 | 0.2182  | 3.447  |
| 162496_r_at | 417.8  | 423.4  | 192.1  | 276.1  | 240.4  | 471.3  | 259.9  | 261.1  | 0.815328665 | 327.35   | 308.175  | 19.175  | 1.062221141 | 0.8461  | -1.051 |
| 162497_r_at | 994.7  | 740.3  | 803    | 852.2  | 982    | 1175.1 | 707.9  | 851.7  | 0.505053951 | 847.55   | 929.175  | 81.625  | 0.912153254 | 0.5405  | 1.084  |
| 162498_r_at | 14.6   | 67.6   | 13.5   | 68.6   | 17.2   | 32.7   | 32.9   | 94.5   | 0.89307128  | 41.075   | 44.325   | 3.25    | 0.926677947 | 0.7891  | 1.175  |
| 162499_f_at | 83.2   | 139.2  | 246.1  | 244.6  | 202.3  | 102.8  | 163.9  | 226.6  | 0.931567716 | 178.275  | 173.9    | 4.375   | 1.025158137 | 0.9379  | 1.026  |
| 162500_f_at | 213.4  | 198.3  | 180.4  | 193.1  | 148.6  | 263.5  | 183.7  | 182.5  | 0.949408833 | 196.3    | 194.575  | 1.725   | 1.008865476 | 0.8226  | 1.029  |
| 162501_at   | 176    | 185.2  | 142.9  | 207    | 172.8  | 249.2  | 179.8  | 197.3  | 0.354280173 | 177.775  | 199.775  | 22      | 0.889876111 | 0.3472  | 1.122  |
| 162502_f_at | 108.7  | 84.3   | 80.3   | 83.5   | 59.2   | 169.6  | 77.7   | 67.2   | 0.882348953 | 89.2     | 93.425   | 4.225   | 0.954776559 | 0.8776  | -1.04  |
| 162503_f_at | 72.7   | 50.7   | 52.6   | 58.4   | 58.9   | 37     | 57.6   | 54.7   | 0.393167639 | 58.6     | 52.05    | 6.55    | 1.125840538 | 0.3943  | -1.133 |



|            |        |        |        |        |        |        |        |        |             |          |          |         |             |          |        |
|------------|--------|--------|--------|--------|--------|--------|--------|--------|-------------|----------|----------|---------|-------------|----------|--------|
| 162504_at  | 56.4   | 40.7   | 31.4   | 44.9   | 28.8   | 52.8   | 55.1   | 32.4   | 0.90431092  | 43.35    | 42.275   | 1.075   | 1.02542874  | 0.8387   | -1.045 |
| 92180_at   | 970.2  | 807.3  | 961.1  | 719    | 794.1  | 1062.5 | 683.3  | 610.3  | 0.538666232 | 864.4    | 787.55   | 76.85   | 1.097581106 | 0.4716   | -1.114 |
| 92181_at   | 58.2   | 70.3   | 41.9   | 103.2  | 115.7  | 57.1   | 45.6   | 43.8   | 0.898540501 | 68.4     | 65.55    | 2.85    | 1.043478261 | 0.8102   | -1.076 |
| 92182_at   | 284.8  | 267.9  | 393    | 291.4  | 290.7  | 247.7  | 391.2  | 353.5  | 0.79699332  | 309.275  | 320.775  | 11.5    | 0.964149326 | 0.8139   | 1.033  |
| 92183_at   | 287.3  | 256.7  | 238.6  | 335.1  | 242.4  | 303    | 251.5  | 192.6  | 0.340250371 | 279.425  | 247.375  | 32.05   | 1.129560384 | 0.3288   | -1.135 |
| 92184_at   | 149    | 166    | 136.7  | 169.1  | 68.2   | 99.8   | 95.5   | 123.2  | 0.006852419 | 155.2    | 96.675   | 58.525  | 1.605378847 | 0.009837 | -1.635 |
| 92185_at   | 139.7  | 123.6  | 158.8  | 146.7  | 89.2   | 149.8  | 215.5  | 149.5  | 0.76157177  | 142.2    | 151      | 8.8     | 0.941721854 | 0.9299   | 1.017  |
| 92186_at   | 193.6  | 186.7  | 269.1  | 220.4  | 153.5  | 227    | 267    | 183.5  | 0.766426049 | 217.45   | 207.75   | 9.7     | 1.046690734 | 0.7117   | -1.058 |
| 92188_s_at | 70.5   | 120.1  | 103.3  | 89.3   | 80.3   | 142    | 115    | 99.9   | 0.451882453 | 95.8     | 109.3    | 13.5    | 0.876486734 | 0.4631   | 1.138  |
| 92189_at   | 464.9  | 450.1  | 603.7  | 497.6  | 395.3  | 568.7  | 575.4  | 422.2  | 0.824473444 | 504.075  | 490.4    | 13.675  | 1.0278854   | 0.7764   | -1.036 |
| 92190_at   | 182    | 168.8  | 157.9  | 171.8  | 179.7  | 156.1  | 238.9  | 231.8  | 0.215978499 | 170.125  | 201.625  | 31.5    | 0.843769374 | 0.1953   | 1.168  |
| 92191_at   | 244    | 297.1  | 244.4  | 302.1  | 273.8  | 172.1  | 282.9  | 256.9  | 0.433973041 | 271.9    | 246.425  | 25.475  | 1.10337831  | 0.4218   | -1.118 |
| 92192_s_at | 251.7  | 210.6  | 315.3  | 266.3  | 286.4  | 209.9  | 302    | 289    | 0.730670487 | 260.975  | 271.825  | 10.85   | 0.960084613 | 0.7397   | 1.042  |
| 92193_r_at | 163.8  | 139    | 167.9  | 174.5  | 151.9  | 196.8  | 164.4  | 155.1  | 0.671698377 | 161.3    | 167.05   | 5.75    | 0.965579168 | 0.6823   | 1.034  |
| 92194_at   | 178.2  | 111.6  | 73.9   | 104.5  | 93.7   | 200.3  | 113.2  | 118.3  | 0.672300527 | 117.05   | 131.375  | 14.325  | 0.89096099  | 0.6306   | 1.131  |
| 92195_at   | 108.2  | 109.3  | 143.3  | 175.6  | 124.9  | 89.6   | 153.5  | 177.3  | 0.931505451 | 134.1    | 136.325  | 2.225   | 0.983678709 | 0.9764   | 1.006  |
| 92196_f_at | 3155.7 | 2826.9 | 3959.8 | 3533.6 | 2540.9 | 2338.7 | 2463.3 | 2065.3 | 0.018119025 | 3369     | 2352.05  | 1016.95 | 1.432367509 | 0.006116 | -1.426 |
| 92197_r_at | 784.6  | 1094.5 | 1592.4 | 1307.4 | 1067   | 865.5  | 1032.1 | 983.8  | 0.314413874 | 1194.725 | 987.1    | 207.625 | 1.210338365 | 0.3441   | -1.175 |
| 92198_s_at | 92.9   | 80.8   | 75.9   | 87.6   | 77.9   | 77.6   | 153.5  | 118.2  | 0.307681885 | 84.3     | 106.8    | 22.5    | 0.789325843 | 0.2989   | 1.218  |
| 92199_at   | 96.9   | 127.3  | 120.8  | 129    | 57.9   | 104.9  | 122.9  | 102.3  | 0.233432163 | 118.5    | 97       | 21.5    | 1.221649485 | 0.2418   | -1.26  |
| 92200_at   | 46.8   | 70.7   | 57.3   | 59.4   | 66     | 90.2   | 32.4   | 78.1   | 0.577103133 | 58.55    | 66.675   | 8.125   | 0.878140232 | 0.7754   | 1.075  |
| 92201_at   | 59.5   | 20     | 66.5   | 51.1   | 16.6   | 102.7  | 21.7   | 63.6   | 0.937505533 | 49.275   | 51.15    | 1.875   | 0.963343109 | 0.8002   | -1.145 |
| 92202_g_at | 91.5   | 143.8  | 142.7  | 197.5  | 128.1  | 25.1   | 70.1   | 52.2   | 0.050369815 | 143.875  | 68.875   | 75      | 2.08892922  | 0.06049  | -2.368 |
| 92203_s_at | 20     | 19.5   | 11.5   | 8.4    | 10.2   | 6.3    | 6.3    | 6.7    | 0.076888968 | 14.85    | 7.375    | 7.475   | 2.013559322 | 0.0341   | -1.931 |
| 92204_at   | 60.4   | 66.9   | 57.5   | 58.8   | 44.9   | 79.6   | 58     | 48.6   | 0.720892441 | 60.9     | 57.775   | 3.125   | 1.054089139 | 0.589    | -1.078 |
| 92205_at   | 114.8  | 64.6   | 51.7   | 107.8  | 45.1   | 32.7   | 22.7   | 46.4   | 0.04801077  | 84.725   | 36.725   | 48      | 2.307011572 | 0.01871  | -2.271 |
| 92206_at   | 138.4  | 68.2   | 68.6   | 99     | 67.9   | 140.5  | 96.9   | 51.5   | 0.870859692 | 93.55    | 89.2     | 4.35    | 1.048766816 | 0.7963   | -1.077 |
| 92207_at   | 243.3  | 323.3  | 623.5  | 575.7  | 301.3  | 392.8  | 592.8  | 538.6  | 0.901143991 | 441.45   | 456.375  | 14.925  | 0.967296631 | 0.7997   | 1.076  |
| 92208_at   | 654.4  | 667.4  | 518.6  | 526.5  | 640.1  | 659.3  | 584.5  | 493.7  | 0.962535435 | 591.725  | 594.4    | 2.675   | 0.995499664 | 0.9574   | 1.005  |
| 92209_at   | 238.7  | 165.2  | 226.3  | 230.3  | 115.5  | 152.5  | 191    | 169.7  | 0.046827016 | 215.125  | 157.175  | 57.95   | 1.368697312 | 0.05844  | -1.377 |
| 92210_at   | 149.6  | 160.3  | 150.9  | 151.4  | 202.5  | 254.4  | 251.9  | 153    | 0.079652961 | 153.05   | 215.45   | 62.4    | 0.710373637 | 0.03709  | 1.379  |
| 92211_at   | 401.4  | 313.6  | 375    | 428    | 324.5  | 359.8  | 434.1  | 414    | 0.921502995 | 379.5    | 383.1    | 3.6     | 0.990602976 | 0.9228   | 1.01   |
| 92212_at   | 82.3   | 66.3   | 42.3   | 57.5   | 73.5   | 85.7   | 81     | 47.5   | 0.441973869 | 62.1     | 71.925   | 9.825   | 0.863399374 | 0.467    | 1.162  |
| 92213_at   | 311.1  | 256.4  | 342.8  | 302.2  | 330.8  | 463.8  | 671.2  | 442.1  | 0.08836793  | 303.125  | 476.975  | 173.85  | 0.635515488 | 0.03497  | 1.532  |
| 92214_at   | 16.1   | 28.2   | 14.3   | 15     | 11.7   | 16.1   | 36.8   | 14     | 0.85877381  | 18.4     | 19.65    | 1.25    | 0.936386768 | 0.9988   | 1      |
| 92215_at   | 11.3   | 7.4    | 7.8    | 9.6    | 7.9    | 11.9   | 6.8    | 4.6    | 0.521235279 | 9.025    | 7.8      | 1.225   | 1.157051282 | 0.4185   | -1.208 |
| 92216_at   | 434.2  | 607.7  | 682.5  | 912    | 670.1  | 415.7  | 529.9  | 519.2  | 0.318488508 | 659.1    | 533.725  | 125.375 | 1.234905616 | 0.3351   | -1.21  |
| 92217_s_at | 24.3   | 37.6   | 27.2   | 20.4   | 31.1   | 41.7   | 23     | 50     | 0.249611834 | 27.375   | 36.45    | 9.075   | 0.751028807 | 0.2535   | 1.31   |
| 92218_at   | 8.2    | 7.7    | 5      | 5.1    | 3.2    | 8.9    | 6.3    | 3.5    | 0.545258561 | 6.5      | 5.475    | 1.025   | 1.187214612 | 0.424    | -1.266 |
| 92219_s_at | 5.9    | 4.4    | 1.6    | 2.6    | 2      | 5.3    | 2.6    | 2.2    | 0.642501249 | 3.625    | 3.025    | 0.6     | 1.198347107 | 0.7005   | -1.157 |
| 92220_s_at | 1148   | 1004.7 | 1086.9 | 832.2  | 930.7  | 1059.5 | 774.9  | 848.2  | 0.258668558 | 1017.95  | 903.325  | 114.625 | 1.126892315 | 0.2657   | -1.126 |
| 92222_f_at | 53.4   | 88.5   | 98     | 46.1   | 117.8  | 78.7   | 99.4   | 65.7   | 0.313982323 | 71.5     | 90.4     | 18.9    | 0.790929204 | 0.2911   | 1.298  |
| 92223_at   | 697.9  | 726.7  | 636.3  | 507    | 714.8  | 935.3  | 578.4  | 612.2  | 0.501370344 | 641.975  | 710.175  | 68.2    | 0.903967332 | 0.5175   | 1.097  |
| 92224_at   | 37.2   | 87.3   | 44.8   | 32     | 29.7   | 27.5   | 78.9   | 69.5   | 0.955142352 | 50.325   | 51.4     | 1.075   | 0.979085603 | 0.9796   | 1.009  |
| 92225_f_at | 396.7  | 375.1  | 311.9  | 331.2  | 307.2  | 437.3  | 298.6  | 331.8  | 0.800194483 | 353.725  | 343.725  | 10      | 1.029093025 | 0.7387   | -1.037 |
| 92226_at   | 2073.4 | 2173.1 | 2179.1 | 1864.4 | 2112.5 | 1930.1 | 2121.8 | 1995.9 | 0.7243419   | 2072.5   | 2040.075 | 32.425  | 1.015894024 | 0.7455   | 1.015  |
| 92227_s_at | 198.5  | 142.6  | 188.8  | 228.6  | 133.2  | 122.3  | 158.5  | 119.8  | 0.042768476 | 189.625  | 133.45   | 56.175  | 1.420944174 | 0.02662  | -1.41  |
| 92228_at   | 599.9  | 581.9  | 538.8  | 546.3  | 425.8  | 395.6  | 360.9  | 369.7  | 0.000128795 | 566.725  | 388      | 178.725 | 1.460631443 | 0.000152 | -1.462 |
| 92229_at   | 53.9   | 57.4   | 46     | 77.8   | 41.9   | 26.2   | 13.3   | 38.1   | 0.021516085 | 58.775   | 29.875   | 28.9    | 1.967364017 | 0.03848  | -2.114 |
| 92230_at   | 63.9   | 62.4   | 101.4  | 107    | 83.7   | 105.5  | 105.7  | 69.8   | 0.632060033 | 83.675   | 91.175   | 7.5     | 0.917740609 | 0.5841   | 1.107  |
| 92231_at   | 96.4   | 96.2   | 83.3   | 129.1  | 82.9   | 122.5  | 89     | 90.7   | 0.71975165  | 101.25   | 96.275   | 4.975   | 1.05167489  | 0.7102   | -1.05  |
| 92232_at   | 67.3   | 107.1  | 120.6  | 118.6  | 95.1   | 37.9   | 146.8  | 207.2  | 0.658027668 | 103.4    | 121.75   | 18.35   | 0.849281314 | 0.9704   | 1.015  |
| 92233_at   | 627.5  | 646.6  | 623.4  | 901.2  | 812.9  | 627.9  | 684.9  | 892.8  | 0.565454101 | 699.675  | 754.625  | 54.95   | 0.927182375 | 0.5353   | 1.082  |
| 92234_at   | 291.7  | 348    | 565.4  | 563.3  | 389.2  | 414.6  | 482.8  | 453.7  | 0.929974925 | 442.1    | 435.075  | 7.025   | 1.016146641 | 0.9034   | 1.022  |
| 92235_g_at | 216.5  | 241.2  | 238    | 243.1  | 156    | 283.5  | 230.7  | 236.4  | 0.783754448 | 234.7    | 226.65   | 8.05    | 1.035517317 | 0.6765   | -1.058 |
| 92237_at   | 17     | 6.5    | 6      | 4.7    | 9.4    | 13.8   | 10.6   | 7      | 0.628292872 | 8.55     | 10.2     | 1.65    | 0.838235294 | 0.4016   | 1.328  |



|            |        |        |        |        |        |        |        |        |             |          |          |             |             |         |        |
|------------|--------|--------|--------|--------|--------|--------|--------|--------|-------------|----------|----------|-------------|-------------|---------|--------|
| 92238_at   | 15.4   | 8.1    | 11.7   | 9.3    | 11.7   | 12     | 15.3   | 10     | 0.588283678 | 11.125   | 12.25    | 1.125       | 0.908163265 | 0.515   | 1.121  |
| 92239_at   | 6.4    | 6.2    | 7      | 6.7    | 4.6    | 10.6   | 6.6    | 4.5    | 1           | 6.575    | 6.575    | 8.88178E-16 | 1           | 0.7735  | -1.062 |
| 92240_at   | 28.7   | 31.2   | 13     | 44.4   | 16.2   | 17.2   | 43.6   | 38.5   | 0.964118859 | 29.325   | 28.875   | 0.45        | 1.015584416 | 0.9481  | 1.025  |
| 92241_at   | 859.2  | 1069.3 | 1286   | 1124.8 | 858.5  | 1146.3 | 797    | 743.1  | 0.165655325 | 1084.825 | 886.225  | 198.6       | 1.224096589 | 0.1554  | -1.229 |
| 92242_at   | 44.7   | 10.8   | 3.8    | 5.8    | 26     | 38.1   | 7.5    | 22.5   | 0.554279295 | 16.275   | 23.525   | 7.25        | 0.691817216 | 0.3248  | 1.989  |
| 92243_at   | 1014.2 | 798.9  | 993.6  | 970.3  | 876.9  | 788.9  | 845.5  | 834.5  | 0.113010625 | 944.25   | 836.45   | 107.8       | 1.128877996 | 0.09448 | -1.125 |
| 92244_at   | 148.8  | 114.7  | 119.2  | 121.7  | 99.1   | 129.8  | 88.6   | 157.6  | 0.693845903 | 126.1    | 118.775  | 7.325       | 1.061671227 | 0.5952  | -1.083 |
| 92245_at   | 345.7  | 287.6  | 236.1  | 308.5  | 335.6  | 321    | 365.5  | 291.6  | 0.270245247 | 294.475  | 328.425  | 33.95       | 0.896627845 | 0.2607  | 1.122  |
| 92246_at   | 82.8   | 48.7   | 46.4   | 81.3   | 45.4   | 82.9   | 46.6   | 57.9   | 0.636122488 | 64.8     | 58.2     | 6.6         | 1.113402062 | 0.6478  | -1.107 |
| 92247_at   | 229.8  | 216.4  | 269.8  | 322.7  | 90.8   | 164.2  | 483.6  | 329.3  | 0.940468724 | 259.675  | 266.975  | 7.3         | 0.972656616 | 0.7075  | -1.162 |
| 92248_at   | 15.5   | 41.2   | 44.6   | 66.6   | 31.4   | 61.2   | 50     | 57.3   | 0.546314591 | 41.975   | 49.975   | 8           | 0.83991996  | 0.4691  | 1.305  |
| 92249_g_at | 30.2   | 40.1   | 51.7   | 62.8   | 27.7   | 53     | 56.3   | 59.7   | 0.779333783 | 46.2     | 49.175   | 2.975       | 0.939501779 | 0.8208  | 1.058  |
| 92250_s_at | 118.2  | 139.7  | 110.9  | 123.7  | 85.9   | 20.2   | 89.2   | 88.5   | 0.047475319 | 123.125  | 70.95    | 52.175      | 1.735377026 | 0.1073  | -2.016 |
| 92251_f_at | 16.4   | 38.6   | 22.2   | 37.2   | 51.2   | 53.6   | 49.1   | 28.5   | 0.077220827 | 28.6     | 45.6     | 17          | 0.627192982 | 0.09808 | 1.646  |
| 92252_at   | 26.6   | 5.7    | 13     | 5.3    | 13.2   | 24.5   | 18.8   | 5.8    | 0.663438762 | 12.65    | 15.575   | 2.925       | 0.812199037 | 0.5609  | 1.353  |
| 92253_at   | 81.6   | 17     | 23.4   | 55.3   | 45     | 114.4  | 56.6   | 44.3   | 0.390865689 | 44.325   | 65.075   | 20.75       | 0.681137149 | 0.2924  | 1.639  |
| 92254_at   | 232.5  | 322.2  | 235.3  | 258.3  | 241    | 206.6  | 183.4  | 274.7  | 0.263264647 | 262.075  | 226.425  | 35.65       | 1.157447278 | 0.247   | -1.161 |
| 92255_at   | 10.7   | 7.1    | 10.8   | 10.4   | 8.5    | 18     | 10.1   | 23.8   | 0.231861799 | 9.75     | 15.1     | 5.35        | 0.645695364 | 0.2133  | 1.439  |
| 92256_at   | 161.7  | 208.3  | 178.5  | 143.3  | 178    | 139.7  | 175    | 169.3  | 0.667651766 | 172.95   | 165.5    | 7.45        | 1.045015106 | 0.7019  | -1.04  |
| 92257_at   | 179.5  | 200.3  | 225.3  | 269.6  | 227.1  | 232.6  | 261.8  | 248.2  | 0.320197726 | 218.675  | 242.425  | 23.75       | 0.902031556 | 0.2688  | 1.12   |
| 92258_at   | 784.7  | 1068.3 | 977.9  | 1186.6 | 1503.9 | 1277.7 | 678.4  | 1142.9 | 0.488820648 | 1004.375 | 1150.725 | 146.35      | 0.87281931  | 0.6011  | 1.112  |
| 92259_at   | 471    | 403.5  | 427.7  | 436.5  | 418    | 568.8  | 468.1  | 404.6  | 0.491745634 | 434.675  | 464.875  | 30.2        | 0.9350363   | 0.5012  | 1.061  |
| 92260_at   | 17.9   | 7.6    | 21.7   | 13.9   | 12.7   | 20.5   | 16.2   | 15.1   | 0.81473204  | 15.275   | 16.125   | 0.85        | 0.947286822 | 0.6815  | 1.113  |
| 92261_at   | 289.6  | 254.7  | 240.8  | 224    | 242    | 246.3  | 208.5  | 229.1  | 0.258848015 | 252.275  | 231.475  | 20.8        | 1.089858516 | 0.2519  | -1.087 |
| 92262_at   | 190.6  | 211.7  | 366.5  | 330.7  | 249.1  | 262.7  | 270.9  | 286.3  | 0.873097526 | 274.875  | 267.25   | 7.625       | 1.028531338 | 0.9568  | 1.009  |
| 92263_at   | 654.8  | 818    | 676.6  | 670    | 681.3  | 646.6  | 718.9  | 734.4  | 0.83316567  | 704.85   | 695.3    | 9.55        | 1.013735078 | 0.8607  | -1.011 |
| 92264_at   | 15.9   | 15.2   | 12.1   | 12.6   | 16.8   | 15.2   | 14.2   | 11.7   | 0.725139811 | 13.95    | 14.475   | 0.525       | 0.96373057  | 0.749   | 1.035  |
| 92265_f_at | 228.8  | 469.3  | 333    | 311.4  | 355.4  | 283.3  | 358    | 345.9  | 0.999647207 | 335.625  | 335.65   | 0.025       | 0.999925518 | 0.8633  | 1.029  |
| 92266_at   | 7.6    | 8.2    | 5.3    | 13.8   | 4      | 8      | 7.3    | 5.2    | 0.261957652 | 8.725    | 6.125    | 2.6         | 1.424489796 | 0.2351  | -1.4   |
| 92267_at   | 390.4  | 233.8  | 362.1  | 369.5  | 248.9  | 381.8  | 430.4  | 326.5  | 0.885169852 | 338.95   | 346.9    | 7.95        | 0.977082733 | 0.8981  | 1.023  |
| 92268_at   | 990.1  | 917.4  | 1001.8 | 971.4  | 944.9  | 965.4  | 1177.4 | 1061.5 | 0.303834506 | 970.175  | 1037.3   | 67.125      | 0.93528873  | 0.2832  | 1.066  |
| 92269_r_at | 46.5   | 42.2   | 143.9  | 91.2   | 46.8   | 60.1   | 57     | 65.7   | 0.396333374 | 80.95    | 57.4     | 23.55       | 1.410278746 | 0.4844  | -1.25  |
| 92270_at   | 1002.5 | 899.2  | 958.8  | 874    | 1015   | 1113.6 | 1244   | 1009.6 | 0.052504759 | 933.625  | 1095.55  | 161.925     | 0.852197526 | 0.03474 | 1.171  |
| 92271_at   | 31.7   | 25.4   | 29.5   | 28.1   | 33.3   | 51     | 43.1   | 41     | 0.028095039 | 28.675   | 42.1     | 13.425      | 0.68111639  | 0.00915 | 1.455  |
| 92272_at   | 128.2  | 152    | 164    | 219    | 201.2  | 121.1  | 223.4  | 224.6  | 0.423892432 | 165.8    | 192.575  | 26.775      | 0.860963261 | 0.479   | 1.15   |
| 92273_at   | 186.9  | 180.4  | 149.1  | 174.3  | 200.7  | 161.3  | 165.3  | 207.3  | 0.47968753  | 172.675  | 183.65   | 10.975      | 0.940239586 | 0.4999  | 1.06   |
| 92274_at   | 19.4   | 5      | 12.1   | 2.4    | 3      | 26.8   | 8      | 9.9    | 0.744756097 | 9.725    | 11.925   | 2.2         | 0.815513627 | 0.7639  | 1.226  |
| 92275_at   | 35.4   | 27.7   | 57.1   | 36.6   | 111.4  | 69.8   | 44.7   | 33     | 0.242757828 | 39.2     | 64.725   | 25.525      | 0.605639243 | 0.2092  | 1.537  |
| 92276_at   | 38.6   | 35.3   | 61.2   | 43.9   | 55.1   | 82.5   | 33.8   | 33.8   | 0.636155193 | 44.75    | 51.3     | 6.55        | 0.872319688 | 0.7351  | 1.092  |
| 92277_at   | 7.1    | 5.8    | 2.8    | 2.4    | 2.7    | 6.1    | 3.1    | 17.5   | 0.486227328 | 4.525    | 7.35     | 2.825       | 0.615646259 | 0.5871  | 1.333  |
| 92278_at   | 378.2  | 335.9  | 352.5  | 338    | 366.1  | 422.7  | 303    | 336.7  | 0.837132988 | 351.15   | 357.125  | 5.975       | 0.983269163 | 0.8932  | 1.011  |
| 92279_at   | 256.7  | 223.7  | 213.5  | 261.1  | 258.3  | 209.3  | 254.5  | 290.1  | 0.512583238 | 238.75   | 253.05   | 14.3        | 0.943489429 | 0.5355  | 1.057  |
| 92280_at   | 121.9  | 129.1  | 285    | 172.2  | 150.7  | 140.3  | 136.7  | 134.7  | 0.405184911 | 177.05   | 140.6    | 36.45       | 1.259246088 | 0.4157  | -1.187 |
| 92281_at   | 214.8  | 247.2  | 227.2  | 210.3  | 258.9  | 287.6  | 183.9  | 147.6  | 0.881533179 | 224.875  | 219.5    | 5.375       | 1.024487472 | 0.731   | -1.059 |
| 92282_at   | 254    | 267.5  | 317.9  | 503.9  | 246.2  | 182.9  | 404.8  | 482.5  | 0.943012405 | 335.825  | 329.1    | 6.725       | 1.020434518 | 0.8513  | -1.055 |
| 92283_s_at | 11.5   | 8.6    | 5.5    | 17     | 2.5    | 7.3    | 10.1   | 2.3    | 0.154092293 | 10.65    | 5.55     | 5.1         | 1.918918919 | 0.1325  | -2.161 |
| 92284_r_at | 4.5    | 15.8   | 3.2    | 3.5    | 5.6    | 13.1   | 5.8    | 4.8    | 0.879091884 | 6.75     | 7.325    | 0.575       | 0.921501706 | 0.6097  | 1.263  |
| 92285_at   | 26.1   | 14.5   | 3.1    | 24     | 12.5   | 37.6   | 3      | 5.6    | 0.821569448 | 16.925   | 14.675   | 2.25        | 1.153321976 | 0.6824  | -1.373 |
| 92286_g_at | 42     | 39     | 30.5   | 34.5   | 30.6   | 58.7   | 41.2   | 29.6   | 0.651715468 | 36.5     | 40.025   | 3.525       | 0.911930044 | 0.7413  | 1.062  |
| 92287_at   | 327.2  | 258.7  | 333.3  | 364.5  | 172.2  | 335.1  | 308.8  | 263.3  | 0.279461103 | 320.925  | 269.85   | 51.075      | 1.189271818 | 0.2802  | -1.217 |
| 92288_at   | 135.5  | 172.7  | 201.3  | 187    | 78.6   | 133.6  | 230    | 197.1  | 0.715160417 | 174.125  | 159.825  | 14.3        | 1.089472861 | 0.5677  | -1.166 |
| 92289_at   | 11.6   | 12.6   | 12.5   | 18.4   | 6.5    | 11.2   | 31.8   | 31.8   | 0.40462716  | 13.775   | 20.325   | 6.55        | 0.677736777 | 0.6487  | 1.216  |
| 92290_at   | 328.8  | 265.9  | 345.8  | 418    | 284.3  | 361    | 370.3  | 336.2  | 0.96539816  | 339.625  | 337.95   | 1.675       | 1.004956354 | 0.9806  | 1.003  |
| 92291_f_at | 111.2  | 150.4  | 129.4  | 143.9  | 164.4  | 133.5  | 170.3  | 157.2  | 0.105478703 | 133.725  | 156.35   | 22.625      | 0.855292613 | 0.1152  | 1.172  |
| 92292_at   | 113.2  | 93.7   | 156.1  | 130.7  | 58.1   | 165.2  | 179    | 147.5  | 0.665487762 | 123.425  | 137.45   | 14.025      | 0.897962896 | 0.8937  | 1.04   |
| 92293_at   | 31.4   | 31.2   | 48.9   | 14.4   | 17.7   | 43.4   | 7.9    | 11.9   | 0.331894728 | 31.475   | 20.225   | 11.25       | 1.556242274 | 0.2508  | -1.757 |



|            |        |        |        |        |        |        |        |        |             |          |         |        |             |         |        |
|------------|--------|--------|--------|--------|--------|--------|--------|--------|-------------|----------|---------|--------|-------------|---------|--------|
| 92294_at   | 258.9  | 224.3  | 336    | 392.1  | 193.2  | 307.2  | 386.6  | 299.6  | 0.914016732 | 302.825  | 296.65  | 6.175  | 1.020815776 | 0.8938  | 1.027  |
| 92295_at   | 8.9    | 8.6    | 12.8   | 11.9   | 10.9   | 14.8   | 7      | 14.5   | 0.580780573 | 10.55    | 11.8    | 1.25   | 0.894067797 | 0.6906  | 1.088  |
| 92296_at   | 51.8   | 55.9   | 54.6   | 77.3   | 41.8   | 61.2   | 89.8   | 49.8   | 0.952834672 | 59.9     | 60.65   | 0.75   | 0.987633965 | 0.9357  | 1.016  |
| 92299_at   | 9      | 25     | 35.2   | 48.6   | 2.9    | 12.4   | 41.9   | 64.6   | 0.953743381 | 29.45    | 30.45   | 1      | 0.967159278 | 0.6797  | -1.407 |
| 92300_at   | 113.2  | 155.3  | 190.2  | 280.6  | 161.5  | 165.8  | 163.4  | 181.3  | 0.670172112 | 184.825  | 168     | 16.825 | 1.10014881  | 0.8341  | -1.043 |
| 92301_at   | 84.1   | 115.5  | 116.8  | 109    | 119.9  | 75.8   | 117.8  | 142.1  | 0.65417614  | 106.35   | 113.9   | 7.55   | 0.933713784 | 0.7505  | 1.053  |
| 92302_at   | 214.9  | 257.7  | 276.1  | 408.9  | 331.2  | 172.3  | 302.5  | 365    | 0.956843174 | 289.4    | 292.75  | 3.35   | 0.988556789 | 0.9933  | 1.002  |
| 92303_at   | 386.2  | 332.4  | 284.6  | 318.4  | 223.4  | 405.8  | 268.1  | 299.4  | 0.513751162 | 330.4    | 299.175 | 31.225 | 1.104370352 | 0.4347  | -1.124 |
| 92304_at   | 201.8  | 197.1  | 250.5  | 274    | 255.6  | 210.3  | 309.6  | 289.1  | 0.26546648  | 230.85   | 266.15  | 35.3   | 0.867368026 | 0.2732  | 1.152  |
| 92305_s_at | 64.2   | 29.2   | 61.7   | 20.1   | 17.9   | 63.3   | 21.5   | 31.9   | 0.530486457 | 43.8     | 33.65   | 10.15  | 1.301634473 | 0.5198  | -1.315 |
| 92306_at   | 241.9  | 314.4  | 319.5  | 481.5  | 322.9  | 307.4  | 297.6  | 288    | 0.537211965 | 339.325  | 303.975 | 35.35  | 1.116292458 | 0.6008  | -1.083 |
| 92307_at   | 151    | 96.9   | 98.7   | 117.6  | 98.9   | 160.6  | 104.1  | 125.5  | 0.752121219 | 116.05   | 122.275 | 6.225  | 0.949090166 | 0.7508  | 1.051  |
| 92308_at   | 127.9  | 101.9  | 166.7  | 223.5  | 123.9  | 117    | 167.7  | 185.2  | 0.842022099 | 155      | 148.45  | 6.55   | 1.0441226   | 0.9299  | -1.019 |
| 92309_i_at | 135.2  | 79.1   | 123.7  | 152.4  | 86.4   | 101.8  | 153.6  | 155.8  | 0.941938325 | 122.6    | 124.4   | 1.8    | 0.985530547 | 0.9595  | 1.011  |
| 92310_at   | 1378.7 | 1375.2 | 1339.2 | 918.2  | 969.5  | 882.8  | 760.9  | 859.1  | 0.034228826 | 1252.825 | 868.075 | 384.75 | 1.443222072 | 0.01829 | -1.429 |
| 92311_s_at | 36     | 40.5   | 62.9   | 53.2   | 22.1   | 51.2   | 65.7   | 53.8   | 0.996571887 | 48.15    | 48.2    | 0.05   | 0.998962656 | 0.8617  | -1.051 |
| 92312_at   | 142.8  | 103.8  | 83.8   | 121.2  | 56.6   | 123    | 126.3  | 69.9   | 0.423877677 | 112.9    | 93.95   | 18.95  | 1.201703034 | 0.3711  | -1.251 |
| 92313_at   | 103.8  | 75.1   | 66.9   | 85.4   | 60     | 118.8  | 95.1   | 75.9   | 0.768463005 | 82.8     | 87.45   | 4.65   | 0.946826758 | 0.8431  | 1.037  |
| 92314_at   | 60.2   | 44     | 33.9   | 10.3   | 19.4   | 69.9   | 37.9   | 73.3   | 0.465391178 | 37.1     | 50.125  | 13.025 | 0.740149626 | 0.5041  | 1.423  |
| 92315_at   | 82.8   | 90.5   | 69.7   | 84.1   | 51.6   | 97.8   | 105.1  | 85     | 0.818679668 | 81.775   | 84.875  | 3.1    | 0.9634757   | 0.9685  | 1.007  |
| 92316_f_at | 10.7   | 19.9   | 9.1    | 9.2    | 17.2   | 10     | 30.1   | 8.3    | 0.492183316 | 12.225   | 16.4    | 4.175  | 0.745426829 | 0.5446  | 1.247  |
| 92317_at   | 141.2  | 161.8  | 257    | 229.3  | 219.2  | 234.1  | 185.5  | 295.1  | 0.351554571 | 197.325  | 233.475 | 36.15  | 0.845165435 | 0.3239  | 1.202  |
| 92318_at   | 26.9   | 10.9   | 39.6   | 32.5   | 42.3   | 19.5   | 8.5    | 20.6   | 0.629736518 | 27.475   | 22.725  | 4.75   | 1.209020902 | 0.599   | -1.273 |
| 92319_i_at | 19.1   | 26.9   | 2.5    | 20.3   | 4.4    | 43.8   | 13.4   | 4.2    | 0.947052708 | 17.2     | 16.45   | 0.75   | 1.045592705 | 0.7873  | -1.246 |
| 92320_f_at | 26.6   | 26     | 12.3   | 36.2   | 22.2   | 53.5   | 45.9   | 24     | 0.282777146 | 25.275   | 36.4    | 11.125 | 0.694368132 | 0.301   | 1.437  |
| 92321_r_at | 33.9   | 2.2    | 9.9    | 15     | 15.1   | 46.4   | 24.6   | 19.9   | 0.288443469 | 15.25    | 26.5    | 11.25  | 0.575471698 | 0.215   | 2.352  |
| 92322_at   | 208.3  | 307.4  | 220.8  | 166.9  | 365.7  | 307.1  | 152.7  | 179.8  | 0.683567485 | 225.85   | 251.325 | 25.475 | 0.898637223 | 0.7932  | 1.069  |
| 92323_at   | 195.4  | 213.6  | 147.1  | 171.4  | 148.3  | 183.9  | 145.7  | 159.4  | 0.240000094 | 181.875  | 159.325 | 22.55  | 1.141534599 | 0.2383  | -1.135 |
| 92324_at   | 2.9    | 5.5    | 5.7    | 3.2    | 3.2    | 15.9   | 17     | 6      | 0.171702715 | 4.325    | 10.525  | 6.2    | 0.410926366 | 0.1531  | 2.056  |
| 92325_at   | 253.1  | 378    | 408.4  | 461.7  | 272.1  | 310.4  | 337.7  | 477.1  | 0.693882828 | 375.3    | 349.325 | 25.975 | 1.07435769  | 0.7038  | -1.073 |
| 92328_at   | 14.9   | 32.2   | 24.2   | 9.4    | 32.7   | 16.2   | 43.9   | 40.5   | 0.151898179 | 20.175   | 33.325  | 13.15  | 0.60540135  | 0.1791  | 1.713  |
| 92329_at   | 45.9   | 47.7   | 23.4   | 42.8   | 57.6   | 73.6   | 41.4   | 49.6   | 0.130919121 | 39.95    | 55.55   | 15.6   | 0.719171917 | 0.1472  | 1.412  |
| 92330_r_at | 26.6   | 42.8   | 43.6   | 16.3   | 42.7   | 40.1   | 62.8   | 49     | 0.101402672 | 32.325   | 48.65   | 16.325 | 0.664439877 | 0.1136  | 1.598  |
| 92331_at   | 797.8  | 677.2  | 887    | 750.3  | 502.1  | 717.3  | 1130.9 | 808.4  | 0.937308651 | 778.075  | 789.675 | 11.6   | 0.985310413 | 0.905   | -1.022 |
| 92332_at   | 19.7   | 18.5   | 13.8   | 16.6   | 6.3    | 10.5   | 14.2   | 13.8   | 0.041810267 | 17.15    | 11.2    | 5.95   | 1.53125     | 0.06174 | -1.591 |
| 92333_at   | 6.9    | 6.3    | 11.2   | 23.9   | 4.6    | 10.6   | 40.6   | 29.4   | 0.371754011 | 12.075   | 21.3    | 9.225  | 0.566901408 | 0.5143  | 1.497  |
| 92334_at   | 29.7   | 19.4   | 17.9   | 17.2   | 13.6   | 32     | 50.1   | 32.3   | 0.244756627 | 21.05    | 32      | 10.95  | 0.6578125   | 0.2941  | 1.412  |
| 92335_at   | 105.6  | 112.5  | 96.8   | 257.1  | 98.1   | 99.3   | 229.2  | 191.8  | 0.826315613 | 143      | 154.6   | 11.6   | 0.924967658 | 0.7799  | 1.097  |
| 92336_at   | 77.5   | 121.9  | 73.7   | 81.7   | 94.1   | 106.2  | 66     | 63.1   | 0.694488364 | 88.7     | 82.35   | 6.35   | 1.077109897 | 0.667   | -1.081 |
| 92337_g_at | 10     | 7.7    | 9.9    | 5.4    | 5.3    | 9.1    | 4.9    | 7.7    | 0.349144799 | 8.25     | 6.75    | 1.5    | 1.222222222 | 0.3583  | -1.226 |
| 92338_f_at | 284.4  | 234.1  | 356.6  | 395.3  | 394.3  | 358.8  | 433.3  | 424.9  | 0.095135741 | 317.6    | 402.825 | 85.225 | 0.788431701 | 0.08697 | 1.291  |
| 92339_at   | 238.7  | 179.3  | 175.3  | 204.2  | 314.8  | 201.3  | 168.6  | 272.9  | 0.330653289 | 199.375  | 239.4   | 40.025 | 0.832811195 | 0.3495  | 1.175  |
| 92340_at   | 30.5   | 24.1   | 44.5   | 37.3   | 65.1   | 67.7   | 82.4   | 34.2   | 0.061347044 | 34.1     | 62.35   | 28.25  | 0.54691259  | 0.04662 | 1.787  |
| 92341_at   | 9.7    | 9.7    | 6.4    | 8.2    | 7.8    | 14.3   | 4.5    | 9.2    | 0.847076513 | 8.5      | 8.95    | 0.45   | 0.94972067  | 0.9558  | -1.015 |
| 92342_at   | 36.1   | 22.5   | 21.9   | 24.4   | 20.5   | 26.6   | 19.9   | 14.3   | 0.211035669 | 26.225   | 20.325  | 5.9    | 1.290282903 | 0.1844  | -1.293 |
| 92343_at   | 121.5  | 95.3   | 81.8   | 106.7  | 60.8   | 133    | 140.5  | 139    | 0.462666148 | 101.325  | 118.325 | 17     | 0.85632791  | 0.6318  | 1.118  |
| 92344_at   | 43.6   | 44     | 32.3   | 61     | 53.7   | 56.5   | 64.5   | 59.1   | 0.107642406 | 45.225   | 58.45   | 13.225 | 0.773738238 | 0.08457 | 1.322  |
| 92345_g_at | 305.5  | 127    | 192.8  | 206.9  | 171.5  | 312.9  | 287.1  | 241.4  | 0.385411636 | 208.05   | 253.225 | 45.175 | 0.821601343 | 0.3649  | 1.245  |
| 92346_at   | 46.4   | 50.8   | 14.5   | 10.4   | 9.4    | 57.2   | 8.8    | 10.4   | 0.588997886 | 30.525   | 21.45   | 9.075  | 1.423076923 | 0.4458  | -1.636 |
| 92347_at   | 54.4   | 25.6   | 8.2    | 16.4   | 40.8   | 21     | 11.6   | 13.1   | 0.723111346 | 26.15    | 21.625  | 4.525  | 1.209248555 | 0.8557  | -1.097 |
| 92348_at   | 2481.3 | 2333.2 | 2855.8 | 2520.9 | 2223.4 | 2401.9 | 2111.6 | 2049.5 | 0.044659156 | 2547.8   | 2196.6  | 351.2  | 1.159883456 | 0.03606 | -1.159 |
| 92349_at   | 31.7   | 7.8    | 8.4    | 44.3   | 38.4   | 52.2   | 9.5    | 7.9    | 0.790129924 | 23.05    | 27      | 3.95   | 0.853703704 | 0.8563  | 1.132  |
| 92350_at   | 886.5  | 783.5  | 1190.3 | 1108   | 973.1  | 986.2  | 1168.5 | 1132.2 | 0.528479239 | 992.075  | 1065    | 72.925 | 0.931525822 | 0.4776  | 1.085  |
| 92351_at   | 16.6   | 37.5   | 7.5    | 25.8   | 9.9    | 71.1   | 10.4   | 10.4   | 0.838020249 | 21.85    | 25.45   | 3.6    | 0.858546169 | 0.8545  | -1.121 |
| 92352_at   | 674.6  | 445.5  | 621.9  | 500.8  | 329    | 529.2  | 804.7  | 563.8  | 0.972575864 | 560.7    | 556.675 | 4.025  | 1.007230431 | 0.8444  | -1.043 |
| 92353_at   | 7.3    | 7.7    | 6.4    | 3.4    | 5.4    | 18.2   | 21     | 5.8    | 0.21556645  | 6.2      | 12.6    | 6.4    | 0.492063492 | 0.2119  | 1.773  |



|            |        |        |        |        |        |        |        |        |             |          |          |         |             |          |        |
|------------|--------|--------|--------|--------|--------|--------|--------|--------|-------------|----------|----------|---------|-------------|----------|--------|
| 92354_at   | 76.6   | 89.1   | 122    | 87.8   | 36.1   | 101.2  | 110.1  | 71.9   | 0.50153079  | 93.875   | 79.825   | 14.05   | 1.176010022 | 0.427    | -1.261 |
| 92355_at   | 139.3  | 141.1  | 201.1  | 321.8  | 165.9  | 164.4  | 418.9  | 368.2  | 0.366536092 | 200.825  | 279.35   | 78.525  | 0.71890102  | 0.3859   | 1.348  |
| 92356_at   | 130.4  | 194.7  | 127    | 16.5   | 204.7  | 187.5  | 18.4   | 178.2  | 0.617020481 | 117.15   | 147.2    | 30.05   | 0.795855978 | 0.7979   | 1.241  |
| 92357_at   | 162.4  | 111.5  | 152.5  | 207.5  | 138.6  | 128.3  | 176.6  | 176.7  | 0.88930994  | 158.475  | 155.05   | 3.425   | 1.022089649 | 0.9604   | 1.008  |
| 92358_at   | 133.3  | 147.1  | 194.8  | 139.7  | 168.9  | 182.5  | 123    | 163.6  | 0.770982399 | 153.725  | 159.5    | 5.775   | 0.963793103 | 0.7679   | 1.038  |
| 92359_at   | 52.3   | 13.6   | 33.4   | 8.8    | 27.8   | 20.5   | 24.4   | 29.4   | 0.891350518 | 27.025   | 25.525   | 1.5     | 1.058765916 | 0.7012   | 1.182  |
| 92360_at   | 905.5  | 880.2  | 1014.6 | 933.9  | 1005.8 | 922    | 1004.1 | 915.3  | 0.490066566 | 933.55   | 961.8    | 28.25   | 0.970627989 | 0.4814   | 1.031  |
| 92361_at   | 6.3    | 23.4   | 11.3   | 23.3   | 19.4   | 7.5    | 7.9    | 22.2   | 0.762735731 | 16.075   | 14.25    | 1.825   | 1.128070175 | 0.8171   | -1.109 |
| 92362_at   | 45.2   | 57     | 58.9   | 73.2   | 52.5   | 58.9   | 19     | 65.7   | 0.45918263  | 58.575   | 49.025   | 9.55    | 1.194798572 | 0.4167   | -1.303 |
| 92363_at   | 110.8  | 126.1  | 59.8   | 140.5  | 138.1  | 100.9  | 54.6   | 64.9   | 0.475701895 | 109.3    | 89.625   | 19.675  | 1.219525802 | 0.476    | -1.241 |
| 92364_at   | 111.8  | 164.5  | 115.7  | 138.3  | 113.7  | 156.1  | 94.6   | 104.7  | 0.432337579 | 132.575  | 117.275  | 15.3    | 1.130462588 | 0.3925   | -1.138 |
| 92365_at   | 370.5  | 326.2  | 327.2  | 392.8  | 302.7  | 459.4  | 430    | 227.5  | 0.990509421 | 354.175  | 354.9    | 0.725   | 0.997957171 | 0.8516   | 1.034  |
| 92366_at   | 1633.5 | 1901.5 | 1590.3 | 1804.1 | 1634   | 1188.5 | 1978.9 | 1867.8 | 0.748760403 | 1732.35  | 1667.3   | 65.05   | 1.039015174 | 0.6717   | -1.056 |
| 92367_at   | 234.3  | 187.1  | 222.8  | 225.1  | 184.6  | 199.7  | 224.6  | 205.6  | 0.343593936 | 217.325  | 203.625  | 13.7    | 1.06728054  | 0.3588   | -1.066 |
| 92368_at   | 42.8   | 34.5   | 91.7   | 112.7  | 91     | 41.6   | 45.4   | 63.9   | 0.670739352 | 70.425   | 60.475   | 9.95    | 1.164530798 | 0.8147   | -1.086 |
| 92369_at   | 91.9   | 85     | 81.1   | 91.2   | 77.4   | 58.5   | 92.1   | 103.6  | 0.688531192 | 87.3     | 82.9     | 4.4     | 1.053075995 | 0.5901   | -1.075 |
| 92370_at   | 59.4   | 41.1   | 34.4   | 47.4   | 33.9   | 57.6   | 38.6   | 48.5   | 0.905805652 | 45.575   | 44.65    | 0.925   | 1.020716685 | 0.8979   | 1.022  |
| 92371_at   | 184.7  | 149.6  | 107.8  | 156    | 135.4  | 217.4  | 175.1  | 166.7  | 0.338244505 | 149.525  | 173.65   | 24.125  | 0.86107112  | 0.3413   | 1.166  |
| 92372_at   | 47.5   | 61.1   | 166.6  | 146    | 89.8   | 110.2  | 145.6  | 138.9  | 0.651868839 | 105.3    | 121.125  | 15.825  | 0.869349845 | 0.4622   | 1.297  |
| 92374_at   | 411.9  | 256.9  | 287.1  | 336.6  | 136.4  | 104.7  | 114.9  | 200.8  | 0.005671877 | 323.125  | 139.2    | 183.925 | 2.321300287 | 0.002819 | -2.36  |
| 92375_at   | 771.5  | 722.9  | 651.1  | 615.1  | 881.1  | 751.8  | 644.8  | 639.1  | 0.584633005 | 690.15   | 729.2    | 39.05   | 0.946448162 | 0.6024   | 1.051  |
| 92376_at   | 591.8  | 648.7  | 719.2  | 591.7  | 698.5  | 896.8  | 575.2  | 607.5  | 0.509666371 | 637.85   | 694.5    | 56.65   | 0.918430526 | 0.5287   | 1.076  |
| 92377_at   | 96.8   | 77.4   | 53.8   | 36.9   | 84.1   | 97     | 58     | 46.2   | 0.781541181 | 66.225   | 71.325   | 5.1     | 0.92849632  | 0.7332   | 1.102  |
| 92378_at   | 9.3    | 8.2    | 11.6   | 34.4   | 20.2   | 9.2    | 8.7    | 40.9   | 0.705735951 | 15.875   | 19.75    | 3.875   | 0.803797468 | 0.7072   | 1.214  |
| 92379_f_at | 5.9    | 3      | 2.8    | 1.7    | 1.2    | 2      | 2.5    | 4.7    | 0.545480363 | 3.35     | 2.6      | 0.75    | 1.288461538 | 0.4914   | -1.327 |
| 92380_r_at | 24     | 4.7    | 0.3    | 3.8    | 1.5    | 9.6    | 2.8    | 8.3    | 0.667912078 | 8.2      | 5.55     | 2.65    | 1.477477477 | 0.8377   | 1.234  |
| 92381_at   | 211.5  | 122.7  | 254.1  | 272.5  | 80.6   | 166.1  | 331.9  | 245.5  | 0.890417281 | 215.2    | 206.025  | 9.175   | 1.04453343  | 0.7374   | -1.133 |
| 92382_at   | 216.1  | 155.1  | 193.5  | 221.9  | 165.1  | 252    | 233.1  | 207.9  | 0.488041794 | 196.65   | 214.525  | 17.875  | 0.916676378 | 0.519    | 1.088  |
| 92383_at   | 96.8   | 108.2  | 123.8  | 150.1  | 77.1   | 73     | 138.6  | 133.3  | 0.528657676 | 119.725  | 105.5    | 14.225  | 1.134834123 | 0.4557   | -1.169 |
| 92384_at   | 290.8  | 334.3  | 302.5  | 276.4  | 368    | 350.1  | 325.2  | 300.9  | 0.118078369 | 301      | 336.05   | 35.05   | 0.895700045 | 0.1152   | 1.116  |
| 92385_at   | 57.2   | 53.4   | 71.4   | 77.3   | 55.8   | 104.3  | 67.7   | 71.8   | 0.435881114 | 64.825   | 74.9     | 10.075  | 0.865487316 | 0.4416   | 1.139  |
| 92386_at   | 133.9  | 165.2  | 210.3  | 242.4  | 193.1  | 149.8  | 185.4  | 217.1  | 0.95631384  | 187.95   | 186.35   | 1.6     | 1.008585994 | 0.9597   | 1.008  |
| 92387_at   | 331.1  | 250.6  | 262    | 263    | 238.5  | 262.7  | 244.5  | 262.3  | 0.277400397 | 276.675  | 252      | 24.675  | 1.097916667 | 0.2394   | -1.092 |
| 92388_at   | 1332.2 | 1100.3 | 1154.7 | 1157.1 | 1256.7 | 1272.6 | 1082.1 | 1141.3 | 0.976441083 | 1186.075 | 1188.175 | 2.1     | 0.998232584 | 0.9718   | 1.002  |
| 92389_at   | 162.2  | 74.6   | 90     | 121.2  | 100.4  | 172.2  | 90.7   | 138.6  | 0.63423863  | 112      | 125.475  | 13.475  | 0.892608089 | 0.6005   | 1.133  |
| 92390_at   | 73.7   | 82     | 108.7  | 122.1  | 42.1   | 90     | 118.9  | 42.2   | 0.33942948  | 96.625   | 73.3     | 23.325  | 1.318212824 | 0.2612   | -1.434 |
| 92391_at   | 291.8  | 271.6  | 271    | 332.5  | 215.7  | 323.2  | 342.4  | 285.4  | 0.998799973 | 291.725  | 291.675  | 0.05    | 1.000171424 | 0.9215   | -1.012 |
| 92392_at   | 17.1   | 9      | 8.3    | 2.2    | 16     | 9.1    | 3.2    | 9.5    | 0.943054958 | 9.15     | 9.45     | 0.3     | 0.968253968 | 0.8448   | 1.119  |
| 92393_at   | 23     | 38.3   | 50.8   | 27.3   | 36.5   | 86.4   | 68.1   | 30.9   | 0.225151765 | 34.85    | 55.475   | 20.625  | 0.628210906 | 0.2117   | 1.526  |
| 92394_f_at | 172.7  | 119.1  | 176.9  | 194.5  | 179.4  | 232.8  | 225.7  | 216.7  | 0.058991154 | 165.8    | 213.65   | 47.85   | 0.776035572 | 0.07435  | 1.303  |
| 92395_r_at | 296.7  | 364.1  | 327.4  | 330.4  | 226.3  | 255.1  | 334.1  | 311.7  | 0.157156958 | 329.65   | 281.8    | 47.85   | 1.169801278 | 0.1444   | -1.181 |
| 92396_at   | 10.1   | 2.6    | 14.8   | 4.8    | 8.5    | 6.1    | 3.4    | 4.2    | 0.442379907 | 8.075    | 5.55     | 2.525   | 1.454954955 | 0.6353   | -1.246 |
| 92397_at   | 727.8  | 673.7  | 683.5  | 764.7  | 654.1  | 612.9  | 616.4  | 747.9  | 0.205909177 | 712.425  | 657.825  | 54.6    | 1.083000798 | 0.1861   | -1.085 |
| 92398_at   | 226.4  | 194.4  | 360.8  | 289.1  | 219    | 207.8  | 240.2  | 219.2  | 0.299859636 | 267.675  | 221.55   | 46.125  | 1.208192282 | 0.2878   | -1.177 |
| 92399_at   | 3.8    | 6.8    | 4      | 5.9    | 4.7    | 9.5    | 9      | 5.1    | 0.241172216 | 5.125    | 7.075    | 1.95    | 0.724381625 | 0.242    | 1.354  |
| 92400_at   | 16.1   | 81.5   | 81.1   | 143.8  | 101.2  | 39.9   | 100.2  | 147    | 0.646974104 | 80.625   | 97.075   | 16.45   | 0.830543394 | 0.5582   | 1.403  |
| 92401_at   | 187    | 154.3  | 150.9  | 203.4  | 123.7  | 212.6  | 172.4  | 161.1  | 0.783341637 | 173.9    | 167.45   | 6.45    | 1.038518961 | 0.7291   | -1.05  |
| 92402_at   | 21.7   | 60.4   | 62     | 38.8   | 106.4  | 82.3   | 70.4   | 89.6   | 0.015831764 | 45.725   | 87.175   | 41.45   | 0.524519644 | 0.03343  | 2.045  |
| 92403_at   | 37.2   | 21.2   | 7      | 12.7   | 30.3   | 10.1   | 24.1   | 14.4   | 0.980992147 | 19.525   | 19.725   | 0.2     | 0.989860583 | 0.816    | 1.112  |
| 92404_at   | 19.6   | 13.7   | 9.9    | 13.4   | 13.7   | 21.5   | 42     | 59.8   | 0.147559647 | 14.15    | 34.25    | 20.1    | 0.413138686 | 0.07924  | 2.134  |
| 92405_at   | 117.6  | 76.5   | 78.2   | 99.5   | 65.3   | 139.3  | 111    | 62.3   | 0.945287761 | 92.95    | 94.475   | 1.525   | 0.983858164 | 0.9099   | 1.027  |
| 92406_at   | 65.1   | 97     | 65.7   | 67.6   | 52.8   | 63.4   | 92.7   | 65.5   | 0.66402353  | 73.85    | 68.6     | 5.25    | 1.076530612 | 0.6146   | -1.084 |
| 92407_at   | 47.1   | 26.1   | 33.6   | 57.9   | 35.6   | 68.4   | 6.8    | 21.5   | 0.612901913 | 41.175   | 33.075   | 8.1     | 1.244897959 | 0.3947   | -1.608 |
| 92408_at   | 157.1  | 133.8  | 109.3  | 136.9  | 160.6  | 89     | 103.7  | 154.2  | 0.733052508 | 134.275  | 126.875  | 7.4     | 1.058325123 | 0.6438   | -1.083 |
| 92409_at   | 295.7  | 312.8  | 301.3  | 316.8  | 227.5  | 278.2  | 414    | 369.9  | 0.736230373 | 306.65   | 322.4    | 15.75   | 0.951147643 | 0.8705   | 1.024  |
| 92410_at   | 322.6  | 295.1  | 363.3  | 323.8  | 190.6  | 287.6  | 340.9  | 316.5  | 0.302208498 | 326.2    | 283.9    | 42.3    | 1.148996125 | 0.287    | -1.173 |



|            |        |        |        |        |       |        |        |        |             |          |         |         |             |          |        |
|------------|--------|--------|--------|--------|-------|--------|--------|--------|-------------|----------|---------|---------|-------------|----------|--------|
| 92411_at   | 447.1  | 442.9  | 514.6  | 462    | 472   | 450.9  | 477.1  | 479.1  | 0.868808244 | 466.65   | 469.775 | 3.125   | 0.993347879 | 0.8327   | 1.008  |
| 92412_s_at | 144.2  | 123.3  | 115.5  | 182.9  | 64.3  | 94.5   | 143.4  | 121.3  | 0.170046957 | 141.475  | 105.875 | 35.6    | 1.336245573 | 0.168    | -1.372 |
| 92413_at   | 49.2   | 32.7   | 12.1   | 18.3   | 20.9  | 37.6   | 45.2   | 7.9    | 0.988613903 | 28.075   | 27.9    | 0.175   | 1.006272401 | 0.9079   | -1.062 |
| 92414_at   | 205.3  | 139    | 288.2  | 303    | 238.9 | 212.9  | 312.2  | 248.6  | 0.678580399 | 233.875  | 253.15  | 19.275  | 0.923859372 | 0.5813   | 1.122  |
| 92415_at   | 77.7   | 28.7   | 14.4   | 12.1   | 12.7  | 24     | 55.7   | 17.9   | 0.766973655 | 33.225   | 27.575  | 5.65    | 1.204895739 | 0.9096   | -1.064 |
| 92416_at   | 81.4   | 41.8   | 26.1   | 77.3   | 15.6  | 42.5   | 11.1   | 13.9   | 0.071137849 | 56.65    | 20.775  | 35.875  | 2.726835138 | 0.04007  | -2.855 |
| 92417_at   | 127.2  | 114.2  | 171.7  | 126.4  | 130.3 | 231.4  | 198.4  | 167.9  | 0.119926001 | 134.875  | 182     | 47.125  | 0.741071429 | 0.104    | 1.336  |
| 92418_at   | 138.1  | 108.4  | 108.8  | 149    | 86.3  | 142.9  | 179.1  | 103.8  | 0.936601209 | 126.075  | 128.025 | 1.95    | 0.9847686   | 0.9409   | -1.014 |
| 92419_at   | 124.3  | 82.5   | 73.1   | 85.7   | 73.8  | 116.5  | 90     | 73.2   | 0.848705282 | 91.4     | 88.375  | 3.025   | 1.034229137 | 0.8484   | -1.032 |
| 92420_at   | 14.3   | 21.3   | 8.8    | 13.2   | 36.3  | 20.2   | 6.8    | 40.9   | 0.235763323 | 14.4     | 26.05   | 11.65   | 0.552783109 | 0.3639   | 1.551  |
| 92421_at   | 125.9  | 151.2  | 153    | 141.6  | 187.4 | 144.1  | 113.8  | 162    | 0.622199332 | 142.925  | 151.825 | 8.9     | 0.941379878 | 0.6969   | 1.048  |
| 92422_at   | 221.1  | 157    | 165    | 185.7  | 172.7 | 162.4  | 140.6  | 203.9  | 0.550410229 | 182.2    | 169.9   | 12.3    | 1.072395527 | 0.5416   | -1.073 |
| 92423_at   | 230.1  | 227.6  | 254.9  | 203.9  | 230   | 206.5  | 208.6  | 229.7  | 0.43390418  | 229.125  | 218.7   | 10.425  | 1.047668038 | 0.4424   | -1.046 |
| 92424_at   | 172.5  | 128.8  | 123.7  | 183.5  | 170.4 | 169.4  | 145.7  | 208    | 0.327153073 | 152.125  | 173.375 | 21.25   | 0.877433309 | 0.3094   | 1.148  |
| 92425_at   | 141.9  | 84.1   | 139.4  | 66.9   | 19.4  | 112.1  | 41.4   | 106.5  | 0.252902383 | 108.075  | 69.85   | 38.225  | 1.547244094 | 0.2307   | -1.845 |
| 92426_at   | 227.7  | 178.7  | 263.8  | 189.2  | 115.6 | 173.3  | 219    | 176.4  | 0.179345665 | 214.85   | 171.075 | 43.775  | 1.255881923 | 0.1828   | -1.273 |
| 92427_at   | 65.1   | 47.1   | 85.9   | 66.8   | 36.8  | 87.6   | 106.2  | 83.1   | 0.501622702 | 66.225   | 78.425  | 12.2    | 0.844437361 | 0.6662   | 1.128  |
| 92428_at   | 1787.8 | 1809.3 | 1368   | 1397.2 | 1247  | 1652.4 | 1243.8 | 1465.2 | 0.272231097 | 1590.575 | 1402.1  | 188.475 | 1.134423365 | 0.2699   | -1.133 |
| 92429_at   | 113.6  | 108.6  | 90.9   | 105.6  | 63.8  | 113.1  | 125.2  | 106.1  | 0.862908685 | 104.675  | 102.05  | 2.625   | 1.025722685 | 0.7493   | -1.054 |
| 92430_at   | 406.8  | 419.6  | 279    | 289.7  | 352.9 | 330.2  | 297.1  | 316.5  | 0.567564905 | 348.775  | 324.175 | 24.6    | 1.075884939 | 0.6325   | -1.059 |
| 92432_at   | 166    | 192.9  | 207.1  | 166.6  | 102.9 | 105.3  | 99.3   | 143.7  | 0.002864284 | 183.15   | 112.8   | 70.35   | 1.623670213 | 0.002874 | -1.635 |
| 92433_at   | 13.8   | 13.5   | 8.2    | 53.8   | 7.5   | 59.9   | 32.3   | 46.3   | 0.392719654 | 22.325   | 36.5    | 14.175  | 0.611643836 | 0.4254   | 1.694  |
| 92434_at   | 285.1  | 230.1  | 297.2  | 266.2  | 248.2 | 291.9  | 248.4  | 260    | 0.690537546 | 269.65   | 262.125 | 7.525   | 1.028707678 | 0.7149   | -1.026 |
| 92435_at   | 26.9   | 16.7   | 41.3   | 45.2   | 39.7  | 35.8   | 8.2    | 38     | 0.839797046 | 32.525   | 30.425  | 2.1     | 1.069022186 | 0.7336   | -1.172 |
| 92436_at   | 13.1   | 24     | 30.9   | 50.5   | 12    | 20.3   | 11.9   | 48.6   | 0.60357645  | 29.625   | 23.2    | 6.425   | 1.276939655 | 0.501    | -1.364 |
| 92437_at   | 113.3  | 66.6   | 149.8  | 155.1  | 146.1 | 227.2  | 78.5   | 150.6  | 0.456909456 | 121.2    | 150.6   | 29.4    | 0.804780876 | 0.5186   | 1.223  |
| 92439_at   | 158.7  | 147.6  | 124.6  | 155.6  | 131.8 | 169.7  | 81.1   | 112.9  | 0.319823942 | 146.625  | 123.875 | 22.75   | 1.183652876 | 0.2702   | -1.22  |
| 92440_at   | 90.9   | 119.5  | 137.7  | 100.4  | 117.4 | 110.3  | 73.1   | 136.1  | 0.869023908 | 112.125  | 109.225 | 2.9     | 1.026550698 | 0.821    | -1.039 |
| 92441_at   | 90.9   | 99.3   | 59.2   | 73.2   | 103.7 | 85.1   | 108.8  | 136.9  | 0.093755927 | 80.65    | 108.625 | 27.975  | 0.742462601 | 0.09264  | 1.354  |
| 92442_at   | 43.1   | 133.1  | 133    | 135.1  | 133.3 | 83.1   | 124.7  | 131.1  | 0.796883707 | 111.075  | 118.05  | 6.975   | 0.940914867 | 0.6596   | 1.151  |
| 92443_i_at | 990.6  | 904    | 512.7  | 760    | 755   | 618.2  | 504.1  | 587.1  | 0.200396912 | 791.825  | 616.1   | 175.725 | 1.285221555 | 0.2168   | -1.261 |
| 92444_f_at | 970.3  | 992.2  | 776.2  | 865    | 843.3 | 859.3  | 968.6  | 993.3  | 0.817203857 | 900.925  | 916.125 | 15.2    | 0.983408378 | 0.7965   | 1.019  |
| 92445_at   | 8.5    | 10.7   | 7.8    | 20.9   | 4.9   | 10.2   | 11.7   | 8.9    | 0.413194224 | 11.975   | 8.925   | 3.05    | 1.341736695 | 0.4016   | -1.304 |
| 92448_s_at | 109.4  | 106.5  | 140.6  | 153.5  | 97.9  | 133.9  | 138.1  | 158.9  | 0.793695698 | 127.5    | 132.2   | 4.7     | 0.964447806 | 0.8141   | 1.034  |
| 92449_at   | 37.5   | 31.1   | 42.4   | 41.1   | 20.9  | 53.9   | 50.1   | 50.1   | 0.521066656 | 38.025   | 43.75   | 5.725   | 0.869142857 | 0.7382   | 1.086  |
| 92450_at   | 352.9  | 260.1  | 395.8  | 444    | 293.8 | 444.2  | 399.4  | 407    | 0.667865304 | 363.2    | 386.1   | 22.9    | 0.940688941 | 0.6559   | 1.071  |
| 92451_at   | 160.4  | 136.1  | 147.3  | 165.1  | 111.5 | 142.6  | 139.7  | 127.8  | 0.064523134 | 152.225  | 130.4   | 21.825  | 1.167369632 | 0.06978  | -1.169 |
| 92452_at   | 418.9  | 387.3  | 366.8  | 467.4  | 307   | 404.3  | 399.1  | 448.9  | 0.604885308 | 410.1    | 389.825 | 20.275  | 1.052010518 | 0.5835   | -1.057 |
| 92453_at   | 0.6    | 5.3    | 1.4    | 1.1    | 1.2   | 2.1    | 0.4    | 1.4    | 0.511327051 | 2.1      | 1.275   | 0.825   | 1.647058824 | 0.5857   | -1.375 |
| 92454_at   | 178.7  | 108.8  | 71.1   | 109.1  | 93.7  | 231    | 104.1  | 129    | 0.582895762 | 116.925  | 139.45  | 22.525  | 0.838472571 | 0.5735   | 1.178  |
| 92455_at   | 56.7   | 30     | 10.9   | 16.7   | 8.9   | 22.9   | 32.8   | 14.1   | 0.476375187 | 28.575   | 19.675  | 8.9     | 1.452350699 | 0.5377   | -1.349 |
| 92456_at   | 212.1  | 212.2  | 231.8  | 251.2  | 248.7 | 200.1  | 206.6  | 215.5  | 0.54806039  | 226.825  | 217.725 | 9.1     | 1.041795843 | 0.528    | -1.043 |
| 92457_at   | 14.7   | 12.9   | 11.3   | 10.4   | 11.3  | 18.4   | 37.9   | 9.8    | 0.357916913 | 12.325   | 19.35   | 7.025   | 0.636950904 | 0.3604   | 1.365  |
| 92458_at   | 133.9  | 93.3   | 113.8  | 78.2   | 101.6 | 112.5  | 107.7  | 99.9   | 0.962896185 | 104.8    | 105.425 | 0.625   | 0.994071615 | 0.8404   | 1.026  |
| 92459_at   | 29     | 21.5   | 16.1   | 30     | 17.9  | 30.3   | 13.6   | 25.8   | 0.668915534 | 24.15    | 21.9    | 2.25    | 1.102739726 | 0.6377   | -1.122 |
| 92460_at   | 294    | 247.8  | 253.7  | 233.4  | 274.7 | 401.7  | 332.6  | 279.3  | 0.113469184 | 257.225  | 322.075 | 64.85   | 0.798649383 | 0.07716  | 1.242  |
| 92461_at   | 107.3  | 40.8   | 44.6   | 93.5   | 57    | 104.9  | 71     | 59     | 0.946453815 | 71.55    | 72.975  | 1.425   | 0.980472765 | 0.7913   | 1.082  |
| 92462_at   | 98.5   | 76.2   | 87.4   | 95     | 46.7  | 65.8   | 71.8   | 87     | 0.079096858 | 89.275   | 67.825  | 21.45   | 1.316255068 | 0.08327  | -1.343 |
| 92464_at   | 332.3  | 250.1  | 318.2  | 247.2  | 260.5 | 413.6  | 271    | 355.9  | 0.410755894 | 286.95   | 325.25  | 38.3    | 0.882244427 | 0.4245   | 1.123  |
| 92465_at   | 22.4   | 25.5   | 29     | 29.7   | 33.7  | 20.4   | 49.9   | 19.2   | 0.608625247 | 26.65    | 30.8    | 4.15    | 0.86525974  | 0.7672   | 1.075  |
| 92466_at   | 1280.1 | 1213.3 | 1028.9 | 1403.7 | 1034  | 1678.9 | 1267.3 | 1378.4 | 0.517706936 | 1231.5   | 1339.65 | 108.15  | 0.919269959 | 0.5524   | 1.078  |
| 92467_g_at | 23.6   | 58.8   | 51.8   | 61.7   | 41.2  | 59.8   | 17.4   | 19     | 0.315024287 | 48.975   | 34.35   | 14.625  | 1.425764192 | 0.3009   | -1.529 |
| 92468_at   | 322.9  | 349.8  | 379.3  | 349.2  | 350.3 | 415.3  | 420.8  | 398.5  | 0.063243494 | 350.3    | 396.225 | 45.925  | 0.884093634 | 0.0616   | 1.13   |
| 92469_at   | 321.1  | 287.5  | 285.6  | 285.9  | 456.5 | 362.6  | 343.8  | 319.6  | 0.081509538 | 295.025  | 370.625 | 75.6    | 0.796020236 | 0.03646  | 1.246  |
| 92470_f_at | 95.4   | 95.4   | 98.3   | 108.6  | 73.6  | 93.1   | 105.1  | 122.3  | 0.93755553  | 99.425   | 98.525  | 0.9     | 1.009134737 | 0.831    | 1.025  |
| 92471_i_at | 158.9  | 71.7   | 71.9   | 26.5   | 196.8 | 183.3  | 106.8  | 112.2  | 0.113375443 | 82.25    | 149.775 | 67.525  | 0.549157069 | 0.1109   | 2.112  |



|            |        |        |        |        |        |        |        |        |             |          |          |         |             |          |        |
|------------|--------|--------|--------|--------|--------|--------|--------|--------|-------------|----------|----------|---------|-------------|----------|--------|
| 92472_f_at | 37.1   | 58.9   | 35.7   | 38.6   | 43.9   | 42.3   | 40.3   | 33.3   | 0.6816416   | 42.575   | 39.95    | 2.625   | 1.065707134 | 0.7295   | -1.049 |
| 92473_at   | 306.2  | 235.6  | 456.2  | 284.8  | 242    | 257.6  | 231.7  | 253.5  | 0.214950484 | 320.7    | 246.2    | 74.5    | 1.302599513 | 0.147    | -1.265 |
| 92474_at   | 156    | 194.3  | 187.8  | 139.9  | 190.9  | 209.4  | 250.9  | 202.8  | 0.053639604 | 169.5    | 213.5    | 44      | 0.793911007 | 0.05292  | 1.264  |
| 92475_g_at | 53.9   | 70.8   | 65.1   | 86     | 55.1   | 72.1   | 69.8   | 82.4   | 0.921386346 | 68.95    | 69.85    | 0.9     | 0.987115247 | 0.9001   | 1.017  |
| 92476_at   | 46.5   | 25.7   | 32.4   | 33.9   | 79.9   | 110.8  | 36     | 16.6   | 0.308094669 | 34.625   | 60.825   | 26.2    | 0.569256062 | 0.4598   | 1.418  |
| 92477_at   | 688.9  | 678.1  | 967.1  | 1121.2 | 366.4  | 496.9  | 918.3  | 910.3  | 0.329394963 | 863.825  | 672.975  | 190.85  | 1.283591515 | 0.2927   | -1.351 |
| 92478_at   | 343.3  | 332.4  | 373.9  | 489.8  | 392.8  | 355    | 521.4  | 432.6  | 0.45415669  | 384.85   | 425.45   | 40.6    | 0.90457163  | 0.4274   | 1.108  |
| 92480_f_at | 216.7  | 211.4  | 301.2  | 351.7  | 351.6  | 238.6  | 364.1  | 397.9  | 0.211854157 | 270.25   | 338.05   | 67.8    | 0.799437953 | 0.2229   | 1.258  |
| 92481_at   | 353.5  | 378.6  | 390.1  | 412.2  | 347.4  | 393.3  | 385.5  | 354.5  | 0.450918264 | 383.6    | 370.175  | 13.425  | 1.036266631 | 0.4526   | -1.036 |
| 92482_at   | 3.8    | 25.5   | 43.5   | 47.4   | 28.1   | 39.9   | 36.4   | 14.6   | 0.980152313 | 30.05    | 29.75    | 0.3     | 1.010084034 | 0.6788   | 1.317  |
| 92483_g_at | 29.6   | 57.9   | 23.8   | 12.3   | 92.9   | 32.5   | 12.7   | 15.7   | 0.735799204 | 30.9     | 38.45    | 7.55    | 0.803641092 | 0.9371   | 1.046  |
| 92484_at   | 96.9   | 125.7  | 104.7  | 141.2  | 102.2  | 117.1  | 128    | 183.1  | 0.48217293  | 117.125  | 132.6    | 15.475  | 0.883295626 | 0.4915   | 1.117  |
| 92485_at   | 23.4   | 24.2   | 8.5    | 37.3   | 14.3   | 61.5   | 16.1   | 33.9   | 0.54582088  | 23.35    | 31.45    | 8.1     | 0.742448331 | 0.6158   | 1.277  |
| 92486_at   | 119.2  | 96.6   | 109.7  | 160    | 102.7  | 123.4  | 146.7  | 138.7  | 0.713010644 | 121.375  | 127.875  | 6.5     | 0.94916911  | 0.662    | 1.063  |
| 92487_at   | 199.5  | 167.3  | 169.6  | 134.7  | 123.8  | 206.9  | 162.6  | 215.9  | 0.719656282 | 167.775  | 177.3    | 9.525   | 0.946277496 | 0.7949   | 1.042  |
| 92488_at   | 39.6   | 59.7   | 44.9   | 43.4   | 50.5   | 53.9   | 37.1   | 61.3   | 0.592316693 | 46.9     | 50.7     | 3.8     | 0.92504931  | 0.6157   | 1.076  |
| 92489_at   | 54.8   | 46.2   | 55.1   | 50.6   | 63.9   | 63.2   | 77.2   | 62.3   | 0.015451883 | 51.675   | 66.65    | 14.975  | 0.77531883  | 0.008219 | 1.288  |
| 92490_at   | 10.8   | 10.4   | 13     | 9.1    | 8.6    | 49.1   | 52.1   | 22.1   | 0.126552717 | 10.825   | 32.975   | 22.15   | 0.328278999 | 0.08116  | 2.456  |
| 92492_at   | 205.1  | 147.9  | 282.3  | 269.1  | 111.2  | 192.4  | 280.9  | 218.9  | 0.610050408 | 226.1    | 200.85   | 25.25   | 1.125715708 | 0.5892   | -1.151 |
| 92493_at   | 81.9   | 56.9   | 41.7   | 78.9   | 84.8   | 43.7   | 76     | 75.8   | 0.704400436 | 64.85    | 70.075   | 5.225   | 0.925437032 | 0.7153   | 1.087  |
| 92494_at   | 3.6    | 3.7    | 2.7    | 5.5    | 6.9    | 5.7    | 2.4    | 2.1    | 0.77773952  | 3.875    | 4.275    | 0.4     | 0.906432749 | 0.9955   | 1.002  |
| 92495_at   | 363.8  | 254.5  | 323.2  | 394.9  | 344.3  | 389.1  | 492.5  | 496.8  | 0.096813718 | 334.1    | 430.675  | 96.575  | 0.775758983 | 0.1007   | 1.291  |
| 92496_at   | 346.3  | 417.9  | 263.8  | 261.9  | 320.5  | 211.5  | 289.2  | 299    | 0.381657048 | 322.475  | 280.05   | 42.425  | 1.151490805 | 0.3958   | -1.143 |
| 92497_at   | 20.2   | 2.6    | 4.6    | 4.1    | 6.5    | 4.6    | 5.9    | 3.8    | 0.565551977 | 7.875    | 5.2      | 2.675   | 1.514423077 | 0.8335   | -1.106 |
| 92498_at   | 1039.7 | 1019.1 | 887.4  | 1368.6 | 952.7  | 604.2  | 923.5  | 852.4  | 0.109662032 | 1078.7   | 833.2    | 245.5   | 1.294647144 | 0.1084   | -1.298 |
| 92499_at   | 8.2    | 27.9   | 8.5    | 13.5   | 19.8   | 39.2   | 17.7   | 9      | 0.417397585 | 14.525   | 21.425   | 6.9     | 0.677946324 | 0.3843   | 1.475  |
| 92500_at   | 146.7  | 219.1  | 223.1  | 406.7  | 221.9  | 166.1  | 319.1  | 428.2  | 0.677490614 | 248.9    | 283.825  | 34.925  | 0.876948824 | 0.6599   | 1.146  |
| 92501_s_at | 456.5  | 535.8  | 796    | 701.6  | 353.3  | 595.4  | 1197   | 807.6  | 0.583425326 | 622.475  | 738.325  | 115.85  | 0.84309078  | 0.7405   | 1.105  |
| 92502_at   | 1746.7 | 1944.6 | 3078.4 | 2447.2 | 1772.5 | 1887.6 | 3467.8 | 2965.6 | 0.683621193 | 2304.225 | 2523.375 | 219.15  | 0.913152029 | 0.7343   | 1.077  |
| 92503_at   | 175.3  | 151    | 153.6  | 220.9  | 217.5  | 153.8  | 213    | 226.3  | 0.279988785 | 175.2    | 202.65   | 27.45   | 0.864544782 | 0.2865   | 1.157  |
| 92504_at   | 184.2  | 15.5   | 26.9   | 201    | 25.6   | 28.5   | 16.4   | 77.2   | 0.256205644 | 106.9    | 36.925   | 69.975  | 2.895057549 | 0.3743   | -2.023 |
| 92505_g_at | 46.2   | 27.8   | 41.9   | 66.1   | 17.5   | 13.1   | 71.8   | 36.3   | 0.517497373 | 45.5     | 34.675   | 10.825  | 1.312184571 | 0.3314   | -1.561 |
| 92506_at   | 44.9   | 36.5   | 43.9   | 38.2   | 47.1   | 51.7   | 80.5   | 36.1   | 0.265695242 | 40.875   | 53.85    | 12.975  | 0.759052925 | 0.2252   | 1.266  |
| 92507_at   | 197.6  | 134.7  | 218.8  | 177.6  | 108.5  | 138.3  | 174.6  | 151.9  | 0.140000348 | 182.175  | 143.325  | 38.85   | 1.271062271 | 0.1501   | -1.27  |
| 92508_s_at | 129.6  | 92.4   | 128    | 150.2  | 34.8   | 75.7   | 141.1  | 133.4  | 0.35595887  | 125.05   | 96.25    | 28.8    | 1.299220779 | 0.3034   | -1.468 |
| 92509_at   | 20.6   | 16.2   | 15.2   | 19.5   | 16.3   | 31.4   | 9.9    | 20     | 0.763732156 | 17.875   | 19.4     | 1.525   | 0.921391753 | 0.9886   | 1.004  |
| 92510_at   | 13.3   | 11.9   | 8.9    | 10.8   | 7.6    | 10.3   | 9.5    | 6.7    | 0.073953775 | 11.225   | 8.525    | 2.7     | 1.316715543 | 0.07675  | -1.323 |
| 92511_at   | 13     | 12.7   | 8.9    | 12.3   | 14.7   | 18.1   | 14.6   | 9.9    | 0.239796448 | 11.725   | 14.325   | 2.6     | 0.818499127 | 0.2627   | 1.207  |
| 92512_g_at | 147.4  | 204.9  | 112.4  | 208.2  | 90     | 210.5  | 183.4  | 60.8   | 0.487586564 | 168.225  | 136.175  | 32.05   | 1.235358913 | 0.3942   | -1.353 |
| 92513_at   | 1360.5 | 1262.7 | 1400.2 | 1240.8 | 1099.8 | 1505   | 1651.2 | 1354.9 | 0.526032476 | 1316.05  | 1402.725 | 86.675  | 0.938209556 | 0.5793   | 1.055  |
| 92514_at   | 32.4   | 17     | 12.4   | 10.7   | 13.5   | 12     | 12.4   | 12.2   | 0.339692699 | 18.125   | 12.525   | 5.6     | 1.447105788 | 0.3136   | -1.313 |
| 92515_at   | 11.5   | 33.1   | 6.4    | 8      | 25.4   | 9.8    | 7.6    | 12.4   | 0.902478766 | 14.75    | 13.8     | 0.95    | 1.06884058  | 0.9229   | 1.046  |
| 92516_at   | 32.6   | 26.5   | 172.6  | 97.8   | 4.6    | 16.6   | 108.1  | 42.2   | 0.379760377 | 82.375   | 42.875   | 39.5    | 1.921282799 | 0.2918   | -2.542 |
| 92517_at   | 502    | 616.7  | 476    | 475.1  | 541.4  | 498.8  | 449.6  | 497.3  | 0.616034814 | 517.45   | 496.775  | 20.675  | 1.041618439 | 0.6285   | -1.038 |
| 92518_at   | 415.2  | 421.6  | 585.4  | 598.9  | 269.1  | 292.2  | 492    | 547.6  | 0.27351486  | 505.275  | 400.225  | 105.05  | 1.262477356 | 0.2443   | -1.305 |
| 92519_at   | 147.4  | 110.4  | 158.7  | 204.7  | 115.6  | 200.3  | 199.1  | 198.9  | 0.448580864 | 155.3    | 178.475  | 23.175  | 0.870149881 | 0.4876   | 1.148  |
| 92520_at   | 67.6   | 8.9    | 33.7   | 31.9   | 38.3   | 65.2   | 54.5   | 44.9   | 0.31659009  | 35.525   | 50.725   | 15.2    | 0.700344998 | 0.2467   | 1.753  |
| 92521_at   | 161    | 106.1  | 176.4  | 209.6  | 141.4  | 170.9  | 185.5  | 180.8  | 0.801009485 | 163.275  | 169.65   | 6.375   | 0.962422635 | 0.7038   | 1.065  |
| 92522_at   | 189.4  | 64.1   | 100.2  | 111.5  | 79.2   | 167.6  | 120.5  | 122.1  | 0.856925884 | 116.3    | 122.35   | 6.05    | 0.950551696 | 0.7473   | 1.096  |
| 92523_at   | 25.3   | 26.1   | 25.8   | 7      | 24.8   | 74.7   | 26.4   | 29.1   | 0.243728587 | 21.05    | 38.75    | 17.7    | 0.543225806 | 0.1863   | 1.859  |
| 92524_at   | 6.7    | 8.7    | 3.6    | 6.9    | 6.7    | 12.6   | 8.9    | 10.2   | 0.10402871  | 6.475    | 9.6      | 3.125   | 0.674479167 | 0.122    | 1.515  |
| 92525_i_at | 287.1  | 273.5  | 244.6  | 326.7  | 203.3  | 178.3  | 163.6  | 155    | 0.002979219 | 282.975  | 175.05   | 107.925 | 1.616538132 | 0.001254 | -1.616 |
| 92526_f_at | 169.9  | 186.6  | 193.6  | 257.1  | 171.8  | 140.5  | 207.5  | 244.5  | 0.728773393 | 201.8    | 191.075  | 10.725  | 1.056129792 | 0.686    | -1.065 |
| 92527_at   | 169.1  | 174.3  | 221.1  | 287    | 180.5  | 159.5  | 196.1  | 255.7  | 0.679460587 | 212.875  | 197.95   | 14.925  | 1.075397828 | 0.6964   | -1.067 |
| 92528_at   | 48.5   | 61.7   | 45.8   | 76.2   | 52.1   | 64.5   | 54.6   | 69.9   | 0.795523785 | 58.05    | 60.275   | 2.225   | 0.963085856 | 0.7162   | 1.053  |
| 92529_s_at | 168.8  | 174.7  | 225.3  | 259.1  | 116.8  | 181.2  | 263.7  | 198.8  | 0.667123775 | 206.975  | 190.125  | 16.85   | 1.088625904 | 0.5986   | -1.116 |



|            |         |         |         |         |         |         |         |         |             |           |           |         |             |         |        |
|------------|---------|---------|---------|---------|---------|---------|---------|---------|-------------|-----------|-----------|---------|-------------|---------|--------|
| 92531_at   | 177.4   | 170     | 228.4   | 169.7   | 198.7   | 235.2   | 298.2   | 219.6   | 0.098793956 | 186.375   | 237.925   | 51.55   | 0.783335085 | 0.07524 | 1.272  |
| 92532_at   | 65.1    | 49.6    | 38.9    | 48.4    | 35.5    | 51.9    | 42.6    | 35.4    | 0.224511729 | 50.5      | 41.35     | 9.15    | 1.221281741 | 0.2098  | -1.216 |
| 92533_at   | 44.6    | 14.4    | 38.9    | 39.6    | 28.8    | 50.5    | 29.8    | 16.7    | 0.774385808 | 34.375    | 31.45     | 2.925   | 1.093004769 | 0.8271  | -1.082 |
| 92534_at   | 352.6   | 292     | 380.8   | 288.7   | 384.1   | 332.2   | 373.9   | 360.1   | 0.245640431 | 328.525   | 362.575   | 34.05   | 0.906088396 | 0.2188  | 1.11   |
| 92535_at   | 217.7   | 286.9   | 295     | 277.8   | 179.6   | 277.1   | 302.9   | 325.5   | 0.960249976 | 269.35    | 271.275   | 1.925   | 0.99290388  | 0.9462  | 1.011  |
| 92536_at   | 33.4    | 43      | 56.1    | 69.2    | 44.9    | 22.8    | 60.1    | 25.3    | 0.341659182 | 50.425    | 38.275    | 12.15   | 1.317439582 | 0.2989  | -1.376 |
| 92537_g_at | 133.1   | 52.1    | 89.5    | 29.3    | 20.2    | 226.9   | 90.1    | 133     | 0.437450816 | 76        | 117.55    | 41.55   | 0.64653339  | 0.6676  | 1.32   |
| 92538_at   | 107.4   | 96.7    | 60.4    | 69.6    | 98.9    | 43.6    | 63.6    | 85.3    | 0.54059485  | 83.525    | 72.85     | 10.675  | 1.146533974 | 0.5156  | -1.169 |
| 92539_at   | 10979.2 | 12889.3 | 7435.7  | 7011.3  | 9431.3  | 9135.9  | 9629.4  | 8041    | 0.743247914 | 9578.875  | 9059.4    | 519.475 | 1.057340994 | 0.8753  | -1.025 |
| 92540_f_at | 801.3   | 664.1   | 947     | 653     | 556.5   | 648.2   | 626.6   | 641.3   | 0.117962803 | 766.35    | 618.15    | 148.2   | 1.239747634 | 0.07316 | -1.228 |
| 92541_at   | 87      | 80.8    | 104.6   | 98.2    | 86.1    | 114.3   | 85.2    | 93.7    | 0.810009866 | 92.65     | 94.825    | 2.175   | 0.977063011 | 0.8219  | 1.021  |
| 92542_at   | 1936.8  | 1955.1  | 1591.8  | 2255.2  | 2648.2  | 1811.6  | 1912.8  | 2683.4  | 0.278275025 | 1934.725  | 2264      | 329.275 | 0.854560512 | 0.2847  | 1.16   |
| 92543_at   | 284.2   | 286.1   | 243.6   | 249     | 250.2   | 256.9   | 231.3   | 246.1   | 0.187074479 | 265.725   | 246.125   | 19.6    | 1.079634332 | 0.1706  | -1.078 |
| 92544_f_at | 5879.7  | 7157.1  | 5887.9  | 6189.2  | 7071.6  | 5450.7  | 6921.7  | 6604.2  | 0.641001885 | 6278.475  | 6512.05   | 233.575 | 0.964131879 | 0.661   | 1.035  |
| 92545_f_at | 3414.6  | 4325    | 2242.9  | 2241.6  | 3346.3  | 2353.6  | 1545.9  | 2481.2  | 0.360116336 | 3056.025  | 2431.75   | 624.275 | 1.256718413 | 0.3613  | -1.252 |
| 92546_r_at | 4364.9  | 4962.7  | 2213.4  | 1983.5  | 3823.7  | 2454.9  | 1683.4  | 2235.9  | 0.387959721 | 3381.125  | 2549.475  | 831.65  | 1.326204415 | 0.4237  | -1.281 |
| 92547_at   | 460.7   | 501.2   | 606.4   | 619.1   | 538.2   | 538.8   | 541.3   | 584.4   | 0.930111249 | 546.85    | 550.675   | 3.825   | 0.993053979 | 0.8572  | -1.014 |
| 92548_g_at | 798     | 739.9   | 366.5   | 495.2   | 619.2   | 657.6   | 538.5   | 349.6   | 0.651710202 | 599.9     | 541.225   | 58.675  | 1.108411474 | 0.7292  | -1.087 |
| 92549_at   | 1852.7  | 1733.9  | 1590.5  | 1476.6  | 1427.4  | 1443.1  | 1362.5  | 1514.5  | 0.063879207 | 1663.425  | 1436.875  | 226.55  | 1.157668552 | 0.03792 | -1.154 |
| 92550_at   | 190     | 566.8   | 324.4   | 302.4   | 269.8   | 357.1   | 239.6   | 405.2   | 0.765476561 | 345.9     | 317.925   | 27.975  | 1.087992451 | 0.9092  | -1.031 |
| 92551_at   | 801.4   | 653.5   | 789.6   | 801.1   | 719.7   | 636.8   | 721     | 699.5   | 0.167847718 | 761.4     | 694.25    | 67.15   | 1.096723082 | 0.1707  | -1.094 |
| 92553_at   | 4003.5  | 5051.3  | 3746.8  | 3463.7  | 4230.1  | 4303.1  | 3747.4  | 4186.1  | 0.898254489 | 4066.325  | 4116.675  | 50.35   | 0.987769256 | 0.8169  | 1.021  |
| 92554_at   | 626.8   | 756.8   | 794.1   | 729.6   | 748.1   | 462.9   | 649.1   | 638.2   | 0.200811552 | 726.825   | 624.575   | 102.25  | 1.163711324 | 0.2023  | -1.176 |
| 92555_at   | 952.5   | 1095.2  | 1001.9  | 968.6   | 1148.8  | 1249.3  | 1109.3  | 1015.4  | 0.079614611 | 1004.55   | 1130.7    | 126.15  | 0.888431945 | 0.06929 | 1.124  |
| 92556_at   | 56.9    | 64.8    | 46.8    | 29.9    | 43.7    | 83.6    | 34.2    | 51.9    | 0.785269696 | 49.6      | 53.35     | 3.75    | 0.929709466 | 0.8277  | 1.059  |
| 92557_at   | 3890.8  | 3074.5  | 2672.3  | 2797.7  | 2858.3  | 3045    | 2866.2  | 2694.7  | 0.447173247 | 3108.825  | 2866.05   | 242.775 | 1.084707175 | 0.4447  | -1.074 |
| 92558_at   | 240.7   | 248.9   | 267.6   | 163.8   | 224.6   | 262.2   | 355.1   | 205.5   | 0.46684613  | 230.25    | 261.85    | 31.6    | 0.879320222 | 0.4788  | 1.131  |
| 92559_at   | 41.4    | 58.2    | 72.4    | 47.8    | 51      | 74      | 79.1    | 62.9    | 0.247669292 | 54.95     | 66.75     | 11.8    | 0.823220974 | 0.241   | 1.225  |
| 92560_g_at | 141.5   | 108.8   | 135.1   | 126.5   | 98.8    | 153.2   | 164.5   | 98.8    | 0.966252682 | 127.975   | 128.825   | 0.85    | 0.993401902 | 0.9141  | 1.017  |
| 92561_at   | 137.4   | 134.2   | 139.2   | 190.1   | 88.6    | 153.4   | 259.7   | 175.4   | 0.641470351 | 150.225   | 169.275   | 19.05   | 0.887461232 | 0.811   | 1.061  |
| 92562_at   | 1201    | 1060.5  | 1019.5  | 879.9   | 1292.9  | 1031.6  | 1115.3  | 1108.1  | 0.305727255 | 1040.225  | 1136.975  | 96.75   | 0.914905781 | 0.2939  | 1.096  |
| 92563_at   | 290     | 229.2   | 230.9   | 205.4   | 218.7   | 206.8   | 295.7   | 264.9   | 0.789526703 | 238.875   | 246.525   | 7.65    | 0.968968664 | 0.7997  | 1.03   |
| 92564_at   | 70      | 77.7    | 88      | 105.4   | 64.9    | 55.4    | 58.3    | 77.7    | 0.066252954 | 85.275    | 64.075    | 21.2    | 1.330862271 | 0.04989 | -1.327 |
| 92565_at   | 1168.9  | 1409.8  | 1459.9  | 1454.4  | 1649.7  | 1329.7  | 1575.2  | 1534.9  | 0.176036449 | 1373.25   | 1522.375  | 149.125 | 0.902044503 | 0.1905  | 1.11   |
| 92566_at   | 73.3    | 61.1    | 55.3    | 39      | 47.9    | 85.3    | 34.1    | 23.7    | 0.565657631 | 57.175    | 47.75     | 9.425   | 1.197382199 | 0.4104  | -1.307 |
| 92567_at   | 3922    | 4394.1  | 4150.7  | 4518.3  | 3663.2  | 3803.1  | 6841.1  | 5494.9  | 0.422485122 | 4246.275  | 4950.575  | 704.3   | 0.857733698 | 0.4619  | 1.128  |
| 92568_at   | 356.9   | 452.5   | 424     | 495.8   | 589.4   | 433.6   | 533.1   | 412.4   | 0.289578616 | 432.3     | 492.125   | 59.825  | 0.878435357 | 0.2932  | 1.134  |
| 92569_f_at | 1070.6  | 959.4   | 986.7   | 1003.6  | 1035.1  | 917.1   | 991.7   | 925.7   | 0.345284196 | 1005.075  | 967.4     | 37.675  | 1.038944594 | 0.3367  | -1.039 |
| 92570_at   | 89.9    | 14.7    | 25.8    | 63.1    | 25.5    | 80.1    | 40.9    | 46.4    | 0.994504206 | 48.375    | 48.225    | 0.15    | 1.00311042  | 0.7675  | 1.158  |
| 92571_at   | 765.3   | 588.5   | 785.6   | 862     | 718.9   | 712.5   | 781.3   | 811.1   | 0.933043815 | 750.35    | 755.95    | 5.6     | 0.992592103 | 0.8648  | 1.016  |
| 92572_at   | 142.7   | 190.9   | 248.3   | 248     | 149.7   | 190.6   | 229.1   | 270.9   | 0.945320557 | 207.475   | 210.075   | 2.6     | 0.987623468 | 0.9441  | -1.013 |
| 92573_at   | 3094.7  | 2740.8  | 3314.4  | 3387.3  | 2736.8  | 2760.3  | 3297.9  | 3286.7  | 0.613652259 | 3134.3    | 3020.425  | 113.875 | 1.037701648 | 0.6124  | -1.038 |
| 92574_at   | 3361.1  | 3402.1  | 3171    | 2739.3  | 3620.3  | 3810.4  | 3026.9  | 2813.1  | 0.617834239 | 3168.375  | 3317.675  | 149.3   | 0.954998606 | 0.6488  | 1.043  |
| 92575_at   | 1027.3  | 1196.4  | 781     | 840.1   | 1107    | 1021.4  | 796.5   | 913.1   | 0.988819601 | 961.2     | 959.5     | 1.7     | 1.001771756 | 0.9692  | 1.005  |
| 92577_f_at | 19405.6 | 24184.7 | 14998.7 | 17843.3 | 19503.3 | 17639.2 | 19569.2 | 19589.4 | 0.987723106 | 19108.075 | 19075.275 | 32.8    | 1.001719503 | 0.9093  | 1.012  |
| 92578_at   | 2509.5  | 2853.3  | 2551.7  | 2144.9  | 3009.8  | 2409    | 2242.8  | 2231.8  | 0.865280063 | 2514.85   | 2473.35   | 41.5    | 1.016778863 | 0.8407  | -1.019 |
| 92579_at   | 552.1   | 801.1   | 670.6   | 841.9   | 927.3   | 652.5   | 774.8   | 844.6   | 0.379743251 | 716.425   | 799.8     | 83.375  | 0.895755189 | 0.3794  | 1.122  |
| 92580_at   | 728     | 656.5   | 546.8   | 569.9   | 689.4   | 711.9   | 665.6   | 581.4   | 0.496644424 | 625.3     | 662.075   | 36.775  | 0.944454933 | 0.4733  | 1.063  |
| 92581_at   | 2423.3  | 2110.7  | 2315.3  | 2216.4  | 2476.9  | 2338.8  | 2642.2  | 2667.2  | 0.041369212 | 2266.425  | 2531.275  | 264.85  | 0.895368935 | 0.04118 | 1.117  |
| 92582_at   | 212.2   | 138.6   | 183.5   | 214     | 173.3   | 234.6   | 231.7   | 233.9   | 0.226272498 | 187.075   | 218.375   | 31.3    | 0.856668575 | 0.2468  | 1.175  |
| 92583_at   | 9.4     | 9.2     | 29.9    | 13.9    | 42.4    | 23.9    | 32.5    | 7       | 0.278294063 | 15.6      | 26.45     | 10.85   | 0.58979206  | 0.3741  | 1.592  |
| 92584_at   | 390.7   | 326.1   | 456.6   | 379.8   | 328.4   | 325.2   | 357.5   | 344     | 0.160549618 | 388.3     | 338.775   | 49.525  | 1.146188473 | 0.1228  | -1.139 |
| 92585_at   | 476.9   | 461.8   | 660.7   | 641.7   | 638.2   | 511.4   | 664     | 660.2   | 0.402201504 | 560.275   | 618.45    | 58.175  | 0.90593419  | 0.3835  | 1.113  |
| 92586_at   | 567.6   | 545.6   | 674.5   | 651.8   | 698.1   | 574.8   | 658.8   | 644.9   | 0.432213466 | 609.875   | 644.15    | 34.275  | 0.946790344 | 0.4264  | 1.058  |
| 92587_at   | 3536.2  | 3380.3  | 3321.8  | 3528.6  | 4153.7  | 3529.4  | 4014.8  | 4302.8  | 0.038946743 | 3441.725  | 4000.175  | 558.45  | 0.860393608 | 0.01812 | 1.159  |
| 92589_at   | 891.5   | 819.8   | 891.9   | 736.2   | 933.6   | 989.5   | 755.7   | 732.1   | 0.818996378 | 834.85    | 852.725   | 17.875  | 0.979037791 | 0.8635  | 1.016  |



|            |         |         |        |        |         |         |        |         |             |          |           |         |             |          |        |
|------------|---------|---------|--------|--------|---------|---------|--------|---------|-------------|----------|-----------|---------|-------------|----------|--------|
| 92590_at   | 15.2    | 64.7    | 104.6  | 80     | 59.8    | 29      | 131.2  | 118.2   | 0.571027638 | 66.125   | 84.55     | 18.425  | 0.782081609 | 0.6129   | 1.345  |
| 92592_at   | 48.7    | 35.6    | 91.7   | 34.5   | 33.1    | 163.1   | 197.7  | 165.3   | 0.091663071 | 52.625   | 139.8     | 87.175  | 0.376430615 | 0.1182   | 2.381  |
| 92593_at   | 1070.7  | 1787.4  | 1859.6 | 2388   | 1343.4  | 2144.5  | 4951.8 | 2376.6  | 0.329192833 | 1776.425 | 2704.075  | 927.65  | 0.656943687 | 0.3185   | 1.413  |
| 92594_at   | 14.7    | 41.1    | 68.2   | 64.1   | 25.5    | 66.3    | 74.9   | 69.9    | 0.496569372 | 47.025   | 59.15     | 12.125  | 0.79501268  | 0.5152   | 1.352  |
| 92595_r_at | 52      | 49.7    | 62.7   | 89.4   | 65.2    | 74.6    | 80.6   | 95.1    | 0.21822403  | 63.45    | 78.875    | 15.425  | 0.804437401 | 0.1777   | 1.267  |
| 92596_at   | 596.7   | 673.5   | 816.2  | 870.8  | 807.8   | 719.8   | 912.8  | 836.2   | 0.333296718 | 739.3    | 819.15    | 79.85   | 0.902520906 | 0.3123   | 1.116  |
| 92597_s_at | 108.5   | 112.9   | 163.9  | 168.2  | 152.5   | 195.9   | 197.8  | 228.6   | 0.048469916 | 138.375  | 193.7     | 55.325  | 0.714377904 | 0.05332  | 1.415  |
| 92598_at   | 1824.8  | 1688.1  | 1650.1 | 1715.3 | 2030    | 2091    | 1815   | 1984.9  | 0.013370959 | 1719.575 | 1980.225  | 260.65  | 0.868373543 | 0.009389 | 1.151  |
| 92599_at   | 4.9     | 8.7     | 3.1    | 8      | 2.7     | 5       | 3.6    | 4.1     | 0.176399106 | 6.175    | 3.85      | 2.325   | 1.603896104 | 0.1707   | -1.52  |
| 92600_f_at | 10.1    | 11.3    | 11.4   | 14.8   | 8.1     | 11.8    | 15.8   | 21.1    | 0.483438237 | 11.9     | 14.2      | 2.3     | 0.838028169 | 0.581    | 1.137  |
| 92601_at   | 32.8    | 9.2     | 22.4   | 24.4   | 30.3    | 31.4    | 28.4   | 8.9     | 0.736165904 | 22.2     | 24.75     | 2.55    | 0.896969697 | 0.8274   | 1.098  |
| 92602_at   | 34.8    | 53.7    | 83.6   | 37.2   | 30.8    | 97      | 58.3   | 77.2    | 0.483641006 | 52.325   | 65.825    | 13.5    | 0.794910748 | 0.5349   | 1.234  |
| 92603_at   | 1498.5  | 1463.4  | 1556.8 | 1737.8 | 1367.6  | 1458.8  | 1338.5 | 1499.9  | 0.094302106 | 1564.125 | 1416.2    | 147.925 | 1.104452055 | 0.07915  | -1.103 |
| 92605_at   | 10.8    | 7       | 16.9   | 11.4   | 1.8     | 2.6     | 5.9    | 16.5    | 0.27732477  | 11.525   | 6.7       | 4.825   | 1.720149254 | 0.1496   | -2.358 |
| 92606_at   | 12.6    | 4.3     | 3      | 7.4    | 2.6     | 4.2     | 2.9    | 4       | 0.209547311 | 6.825    | 3.425     | 3.4     | 1.99270073  | 0.1474   | -1.747 |
| 92607_at   | 1677    | 1800.4  | 2105.3 | 2066.7 | 1907.1  | 1461.1  | 2547.5 | 2417.3  | 0.560941813 | 1912.35  | 2083.25   | 170.9   | 0.917964719 | 0.6468   | 1.069  |
| 92608_at   | 2336.4  | 2689    | 2510.7 | 2772   | 1954.1  | 2143.1  | 2606.1 | 2668.4  | 0.29746435  | 2577.025 | 2342.925  | 234.1   | 1.099917838 | 0.276    | -1.107 |
| 92610_at   | 1050    | 1160.3  | 1118.3 | 966    | 1101.7  | 807     | 851.2  | 1036.1  | 0.193748131 | 1073.65  | 949       | 124.65  | 1.131348788 | 0.1792   | -1.138 |
| 92611_at   | 1892    | 2028.2  | 2172.5 | 2237.8 | 1945.2  | 1998.6  | 2215.7 | 1847    | 0.488120016 | 2082.625 | 2001.625  | 81      | 1.04046712  | 0.4856   | -1.041 |
| 92612_at   | 26.9    | 12.3    | 30.5   | 10.3   | 54.9    | 56.7    | 8.8    | 52.3    | 0.136715441 | 20       | 43.175    | 23.175  | 0.463231036 | 0.2639   | 1.924  |
| 92614_at   | 900.3   | 1360.4  | 845.9  | 1065.3 | 1249.4  | 1001.6  | 1502.4 | 1392.3  | 0.175266692 | 1042.975 | 1286.425  | 243.45  | 0.810754611 | 0.1688   | 1.241  |
| 92615_at   | 3417.8  | 3353.6  | 3170   | 2451.9 | 2888.6  | 3544.1  | 3085.1 | 2702.4  | 0.88493261  | 3098.325 | 3055.05   | 43.275  | 1.014165071 | 0.915    | -1.011 |
| 92616_at   | 3609.9  | 3056.3  | 3372.4 | 2880.7 | 3521.4  | 3489.8  | 3384.3 | 3265.7  | 0.346475519 | 3229.825 | 3415.3    | 185.475 | 0.945692911 | 0.3074   | 1.061  |
| 92617_at   | 509.5   | 347     | 291.9  | 411.7  | 452.4   | 618.6   | 423.2  | 418.2   | 0.234200308 | 390.025  | 478.1     | 88.075  | 0.815781217 | 0.2093   | 1.236  |
| 92618_at   | 117.1   | 118.5   | 116.2  | 191.5  | 61.3    | 113.8   | 226.8  | 197.8   | 0.754467677 | 135.825  | 149.925   | 14.1    | 0.905952976 | 0.9925   | 1.003  |
| 92619_at   | 1708    | 1392.6  | 1380.6 | 1421.4 | 1412.3  | 1775.3  | 1442.9 | 1345.8  | 0.886555928 | 1475.65  | 1494.075  | 18.425  | 0.987667955 | 0.8986   | 1.011  |
| 92621_at   | 4302.7  | 4674.2  | 4415.9 | 4836.8 | 4242.2  | 3358.2  | 3668.7 | 3806.6  | 0.014776216 | 4557.4   | 3768.925  | 788.475 | 1.209204216 | 0.01304  | -1.212 |
| 92622_at   | 826.2   | 693.5   | 763.2  | 670.3  | 931.7   | 687.3   | 691.5  | 794.2   | 0.598624934 | 738.3    | 776.175   | 37.875  | 0.951203015 | 0.6158   | 1.047  |
| 92623_at   | 3746.5  | 3351.7  | 3137.9 | 3176.6 | 3850.9  | 3984.7  | 3929.4 | 3534.9  | 0.036755628 | 3353.175 | 3824.975  | 471.8   | 0.876652789 | 0.03362  | 1.142  |
| 92624_r_at | 298.7   | 242.7   | 241.7  | 249.5  | 192.8   | 331.8   | 226    | 209.6   | 0.623641105 | 258.15   | 240.05    | 18.1    | 1.075400958 | 0.5078   | -1.096 |
| 92625_at   | 8870.9  | 9878.1  | 6361.5 | 5435.6 | 7692.8  | 7768.4  | 5653.6 | 6322.2  | 0.537853323 | 7636.525 | 6859.25   | 777.275 | 1.113317783 | 0.6041   | -1.091 |
| 92626_at   | 344.8   | 447.3   | 303.1  | 275.4  | 317.1   | 197.3   | 384.7  | 265.1   | 0.38232941  | 342.65   | 291.05    | 51.6    | 1.177289126 | 0.3589   | -1.192 |
| 92628_at   | 12095.3 | 15143.9 | 8586.3 | 8753.5 | 12232.8 | 11290.3 | 9323.2 | 10713.6 | 0.88656106  | 11144.75 | 10889.975 | 254.775 | 1.023395371 | 0.9974   | 1      |
| 92629_f_at | 4383.2  | 3913.6  | 4010.1 | 3841.1 | 3622.9  | 5015.1  | 3408.2 | 3402.8  | 0.691539046 | 4037     | 3862.25   | 174.75  | 1.045245647 | 0.5818   | -1.058 |
| 92630_r_at | 1921.3  | 1998.8  | 1936.1 | 2027.6 | 1925.2  | 1668.7  | 1794.7 | 1632.7  | 0.04059099  | 1970.95  | 1755.325  | 215.625 | 1.1228405   | 0.02474  | -1.125 |
| 92631_f_at | 1005.8  | 787.8   | 726    | 762.2  | 819.6   | 1029.4  | 835.7  | 836.5   | 0.486160891 | 820.45   | 880.3     | 59.85   | 0.932011814 | 0.4437   | 1.077  |
| 92632_at   | 1878.7  | 2065    | 2165   | 1738.4 | 1964.9  | 2182.3  | 2185.5 | 1936.4  | 0.404619603 | 1961.775 | 2067.275  | 105.5   | 0.948966635 | 0.3918   | 1.056  |
| 92633_at   | 580.4   | 792.8   | 568.3  | 789.6  | 820.5   | 599.4   | 769.5  | 751.7   | 0.531088051 | 682.775  | 735.275   | 52.5    | 0.928598144 | 0.5125   | 1.083  |
| 92634_at   | 49.7    | 70.9    | 57.6   | 91.6   | 60.1    | 93.8    | 74     | 79.8    | 0.444286089 | 67.45    | 76.925    | 9.475   | 0.876828079 | 0.4051   | 1.156  |
| 92635_at   | 145.5   | 142.8   | 98.1   | 133.4  | 105     | 142.9   | 114.4  | 94.5    | 0.336692235 | 129.95   | 114.2     | 15.75   | 1.137915937 | 0.3471   | -1.138 |
| 92636_f_at | 4331.3  | 5900.5  | 4475   | 4678.9 | 5841.5  | 5010.2  | 5057.8 | 5107    | 0.367760656 | 4846.425 | 5254.125  | 407.7   | 0.922403826 | 0.3148   | 1.09   |
| 92637_at   | 1482.8  | 1238.9  | 1269   | 1336.1 | 1235.4  | 1688.9  | 1504.9 | 1193    | 0.596012216 | 1331.7   | 1405.55   | 73.85   | 0.94745829  | 0.6323   | 1.047  |
| 92638_at   | 124     | 147.3   | 202.9  | 258.8  | 195.9   | 150.5   | 211.3  | 254.3   | 0.614420628 | 183.25   | 203       | 19.75   | 0.90270936  | 0.5477   | 1.134  |
| 92639_at   | 629.3   | 629.1   | 539.8  | 591.1  | 573.4   | 590.5   | 546.6  | 679.4   | 0.996796903 | 597.325  | 597.475   | 0.15    | 0.999748943 | 0.9843   | 1.001  |
| 92640_at   | 3013.2  | 3888.2  | 2850.5 | 2641.9 | 3874    | 3186.3  | 3364.3 | 2675.6  | 0.649427982 | 3098.45  | 3275.05   | 176.6   | 0.946077159 | 0.6295   | 1.059  |
| 92642_at   | 107.6   | 144.5   | 96.9   | 96.3   | 126.4   | 193     | 92.8   | 129     | 0.363679959 | 111.325  | 135.3     | 23.975  | 0.822801183 | 0.3629   | 1.191  |
| 92643_at   | 623.3   | 576.5   | 717.3  | 744.8  | 596.2   | 698.1   | 561.6  | 748.5   | 0.814877191 | 665.475  | 651.1     | 14.375  | 1.022078022 | 0.8046   | 1.023  |
| 92644_s_at | 70.3    | 50.5    | 68.9   | 64.8   | 61.3    | 51.4    | 54.1   | 85.4    | 0.951424426 | 63.625   | 63.05     | 0.575   | 1.009119746 | 0.8795   | -1.022 |
| 92645_at   | 45.3    | 6.4     | 48.7   | 28.9   | 30      | 47.6    | 39.5   | 17.8    | 0.908422026 | 32.325   | 33.725    | 1.4     | 0.958487769 | 0.6789   | 1.253  |
| 92646_at   | 2311.1  | 2971.1  | 2090.5 | 1801.6 | 2628.9  | 2202.1  | 1759.7 | 1985.5  | 0.648118744 | 2293.575 | 2144.05   | 149.525 | 1.069739512 | 0.6654   | -1.063 |
| 92647_at   | 2045.6  | 2624.7  | 2490.4 | 3032.2 | 2706.9  | 2215.9  | 2875   | 2846.8  | 0.673833547 | 2548.225 | 2661.15   | 112.925 | 0.957565338 | 0.6544   | 1.049  |
| 92648_at   | 474.6   | 609.7   | 655.1  | 686.8  | 805.8   | 662.2   | 679.3  | 802.1   | 0.075970737 | 606.55   | 737.35    | 130.8   | 0.822607988 | 0.08543  | 1.222  |
| 92649_at   | 848.1   | 723.7   | 711.7  | 850.4  | 832.2   | 598.5   | 825.3  | 916     | 0.907789349 | 783.475  | 793       | 9.525   | 0.987988651 | 0.9754   | 1.003  |
| 92650_at   | 6.1     | 4.9     | 25.4   | 35.8   | 24.4    | 25.6    | 47.1   | 31.7    | 0.180293896 | 18.05    | 32.2      | 14.15   | 0.560559006 | 0.1416   | 2.421  |
| 92652_at   | 27      | 52.6    | 82.8   | 54.1   | 56.8    | 62.5    | 59.8   | 57.2    | 0.694716117 | 54.125   | 59.075    | 4.95    | 0.91620821  | 0.514    | 1.175  |
| 92653_at   | 43.4    | 34.4    | 26.9   | 38.4   | 47.2    | 52.7    | 44.2   | 52.2    | 0.022682126 | 35.775   | 49.075    | 13.3    | 0.728986246 | 0.02417  | 1.389  |



|            |       |       |       |       |       |       |       |       |             |         |         |         |             |          |        |
|------------|-------|-------|-------|-------|-------|-------|-------|-------|-------------|---------|---------|---------|-------------|----------|--------|
| 92654_at   | 179.7 | 175.7 | 161.5 | 140.1 | 211   | 165.2 | 194.6 | 174.7 | 0.155771253 | 164.25  | 186.375 | 22.125  | 0.881287726 | 0.159    | 1.135  |
| 92655_at   | 196.7 | 142.1 | 93    | 118.9 | 120.7 | 187.3 | 169.9 | 125.6 | 0.6498446   | 137.675 | 150.875 | 13.2    | 0.912510356 | 0.5833   | 1.117  |
| 92656_at   | 241   | 261.2 | 272.6 | 265.6 | 180.1 | 227.8 | 293.8 | 285.2 | 0.655955159 | 260.1   | 246.725 | 13.375  | 1.054210153 | 0.5693   | -1.073 |
| 92658_at   | 11.5  | 91    | 85.7  | 107.2 | 25.1  | 15.5  | 7.6   | 12.3  | 0.068099277 | 73.85   | 15.125  | 58.725  | 4.882644628 | 0.05407  | -4.029 |
| 92659_at   | 23.8  | 9.9   | 19.8  | 32.6  | 18.5  | 7.1   | 36.3  | 34.8  | 0.764912764 | 21.525  | 24.175  | 2.65    | 0.890382627 | 0.9651   | 1.021  |
| 92660_f_at | 605.8 | 754.7 | 952.4 | 1003  | 926.5 | 691.4 | 945   | 905.3 | 0.740916627 | 828.975 | 867.05  | 38.075  | 0.956086731 | 0.6935   | 1.058  |
| 92661_at   | 53.3  | 54.5  | 60.8  | 66.9  | 99.3  | 86.8  | 82.6  | 79.6  | 0.002503356 | 58.875  | 87.075  | 28.2    | 0.676141258 | 0.001541 | 1.48   |
| 92662_g_at | 164.3 | 82.7  | 165.1 | 202   | 293.2 | 191.8 | 200.5 | 226.3 | 0.072065759 | 153.525 | 227.95  | 74.425  | 0.673502961 | 0.09376  | 1.541  |
| 92663_at   | 197.7 | 93.8  | 152.9 | 190.6 | 211.9 | 210   | 247.9 | 262.3 | 0.04409561  | 158.75  | 233.025 | 74.275  | 0.681257376 | 0.05915  | 1.521  |
| 92664_at   | 248.4 | 220.4 | 194   | 223.1 | 139.1 | 232.4 | 174.6 | 202.4 | 0.195566727 | 221.475 | 187.125 | 34.35   | 1.183567134 | 0.1825   | -1.2   |
| 92665_f_at | 261.5 | 311.9 | 220.5 | 378.2 | 408.1 | 358.8 | 261   | 277.5 | 0.517902472 | 293.025 | 326.35  | 33.325  | 0.897885706 | 0.5056   | 1.117  |
| 92666_at   | 78.5  | 134.8 | 215.4 | 71.6  | 59.7  | 107.6 | 63.4  | 62.8  | 0.221181224 | 125.075 | 73.375  | 51.7    | 1.704599659 | 0.1627   | -1.59  |
| 92667_at   | 392.8 | 231   | 325.3 | 476.3 | 232.3 | 349.7 | 395.6 | 470.8 | 0.939009807 | 356.35  | 362.1   | 5.75    | 0.984120409 | 0.9348   | 1.019  |
| 92668_at   | 79.6  | 77    | 86.3  | 108.7 | 79.2  | 129.1 | 85.5  | 124.5 | 0.314151273 | 87.9    | 104.575 | 16.675  | 0.840545063 | 0.3222   | 1.173  |
| 92670_at   | 92.8  | 123.9 | 126.4 | 116.3 | 96    | 149.6 | 89.8  | 64.2  | 0.48555868  | 114.85  | 99.9    | 14.95   | 1.14964965  | 0.3784   | -1.196 |
| 92671_f_at | 20.4  | 56.7  | 49.9  | 50    | 56.1  | 35.1  | 47.5  | 68.8  | 0.506214221 | 44.25   | 51.875  | 7.625   | 0.853012048 | 0.4947   | 1.222  |
| 92672_at   | 90.2  | 62.2  | 42.8  | 169.6 | 35.8  | 74.1  | 198.8 | 142.9 | 0.652737119 | 91.2    | 112.9   | 21.7    | 0.807794508 | 0.7594   | 1.166  |
| 92673_at   | 106   | 71.5  | 91.5  | 89.2  | 20.3  | 24.4  | 34    | 40.4  | 0.000772484 | 89.55   | 29.775  | 59.775  | 3.007556675 | 0.000675 | -3.088 |
| 92674_at   | 18.9  | 7.8   | 4.4   | 10.1  | 6.3   | 12.4  | 6.3   | 6.9   | 0.532876495 | 10.3    | 7.975   | 2.325   | 1.29153605  | 0.6548   | -1.175 |
| 92676_at   | 22.1  | 5     | 5.4   | 3.3   | 5.2   | 6.7   | 14.6  | 20.7  | 0.635452402 | 8.95    | 11.8    | 2.85    | 0.758474576 | 0.4532   | 1.525  |
| 92677_s_at | 107.8 | 77.7  | 122.2 | 58    | 52.3  | 110.1 | 99.8  | 83.6  | 0.804560853 | 91.425  | 86.45   | 4.975   | 1.057547715 | 0.8304   | -1.054 |
| 92678_at   | 429.8 | 490.2 | 498   | 609.1 | 820.3 | 617.2 | 263.9 | 413.5 | 0.871962658 | 506.775 | 528.725 | 21.95   | 0.958485035 | 0.8918   | -1.037 |
| 92681_at   | 51.5  | 33.9  | 61.4  | 67.4  | 63.1  | 42.6  | 85.5  | 71.5  | 0.337035418 | 53.55   | 65.675  | 12.125  | 0.815378759 | 0.3716   | 1.227  |
| 92682_at   | 23.7  | 38.6  | 14    | 22.4  | 22.5  | 31.5  | 19.1  | 21.2  | 0.857676828 | 24.675  | 23.575  | 1.1     | 1.046659597 | 0.9959   | 1.001  |
| 92683_at   | 20.7  | 11.7  | 15.7  | 13.6  | 12.9  | 32.9  | 3.4   | 13.1  | 0.98281274  | 15.425  | 15.575  | 0.15    | 0.990369181 | 0.6206   | -1.286 |
| 92684_at   | 13.2  | 13.4  | 22.3  | 10    | 13.3  | 16.5  | 13.6  | 14    | 0.898792269 | 14.725  | 14.35   | 0.375   | 1.026132404 | 0.9453   | 1.013  |
| 92685_at   | 170.2 | 198.2 | 220.5 | 156.3 | 216.8 | 209.3 | 134.1 | 198.9 | 0.888771154 | 186.3   | 189.775 | 3.475   | 0.981688842 | 0.943    | 1.01   |
| 92686_at   | 572.1 | 499.5 | 744.6 | 629.2 | 416.3 | 298.4 | 351   | 342.8 | 0.009081629 | 611.35  | 352.125 | 259.225 | 1.736173234 | 0.0023   | -1.73  |
| 92687_at   | 22.2  | 24    | 16.5  | 10.9  | 29.7  | 59.8  | 24.7  | 23.5  | 0.157362568 | 18.4    | 34.425  | 16.025  | 0.53449528  | 0.07852  | 1.812  |
| 92688_at   | 413   | 357.3 | 346.7 | 288.4 | 278   | 321.4 | 361.5 | 418.7 | 0.875275483 | 351.35  | 344.9   | 6.45    | 1.018701073 | 0.8554   | 1.022  |
| 92689_at   | 69.4  | 63.9  | 84.4  | 82.5  | 58.5  | 46.7  | 136.2 | 140.4 | 0.476087921 | 75.05   | 95.45   | 20.4    | 0.786275537 | 0.6669   | 1.141  |
| 92690_at   | 78.4  | 74.8  | 35.8  | 80.5  | 60.2  | 122.7 | 76.9  | 89.3  | 0.286761802 | 67.375  | 87.275  | 19.9    | 0.771985105 | 0.3047   | 1.316  |
| 92691_at   | 167.4 | 153.9 | 147.1 | 129.4 | 165.5 | 222   | 208.7 | 193.4 | 0.020246308 | 149.45  | 197.4   | 47.95   | 0.757092199 | 0.01587  | 1.318  |
| 92692_at   | 49.5  | 55.3  | 60    | 82.6  | 69.2  | 75.5  | 59    | 80.4  | 0.333414256 | 61.85   | 71.025  | 9.175   | 0.870820134 | 0.2883   | 1.162  |
| 92693_at   | 7.3   | 10.6  | 32.9  | 71    | 33.4  | 39.6  | 84    | 53.6  | 0.27809199  | 30.45   | 52.65   | 22.2    | 0.578347578 | 0.1692   | 2.395  |
| 92694_at   | 77.6  | 31.6  | 46.7  | 37.5  | 65    | 100.7 | 8.1   | 48    | 0.758824623 | 48.35   | 55.45   | 7.1     | 0.871956718 | 0.8303   | -1.14  |
| 92695_at   | 9.2   | 34    | 29.9  | 24.8  | 54    | 25.2  | 41.8  | 41.7  | 0.090427457 | 24.475  | 40.675  | 16.2    | 0.601720959 | 0.1352   | 1.792  |
| 92696_at   | 63.1  | 52.5  | 54.3  | 45.7  | 22.8  | 59.6  | 39.6  | 56.4  | 0.369377144 | 53.9    | 44.6    | 9.3     | 1.208520179 | 0.3216   | -1.282 |
| 92697_at   | 41.8  | 58.3  | 37.7  | 51.3  | 50.2  | 71.8  | 37.8  | 66.6  | 0.351406179 | 47.275  | 56.6    | 9.325   | 0.83524735  | 0.3885   | 1.178  |
| 92698_at   | 175.3 | 149.6 | 171.6 | 193.3 | 194.2 | 183.5 | 207.2 | 223.2 | 0.054486821 | 172.45  | 202.025 | 29.575  | 0.853607227 | 0.0559   | 1.173  |
| 92699_at   | 116.4 | 97.7  | 106.6 | 102.7 | 113.2 | 121.2 | 111.3 | 70.9  | 0.894347604 | 105.85  | 104.15  | 1.7     | 1.016322612 | 0.7924   | -1.036 |
| 92700_at   | 286.9 | 263.8 | 424.7 | 339.3 | 325   | 373.3 | 360.7 | 369   | 0.495214993 | 328.675 | 357     | 28.325  | 0.920658263 | 0.4058   | 1.103  |
| 92701_at   | 309.4 | 290   | 330.4 | 282.2 | 226.7 | 382.5 | 303.5 | 291   | 0.954163185 | 303     | 300.925 | 2.075   | 1.006895406 | 0.8513   | -1.022 |
| 92702_at   | 55.6  | 5.5   | 24.9  | 38.3  | 20.7  | 50.6  | 16.7  | 32.7  | 0.947442249 | 31.075  | 30.175  | 0.9     | 1.029826015 | 0.7777   | 1.181  |
| 92703_at   | 621.5 | 685.3 | 865.2 | 900.9 | 486.2 | 469.5 | 884.4 | 886.2 | 0.552843985 | 768.225 | 681.575 | 86.65   | 1.12713201  | 0.4682   | -1.167 |
| 92704_at   | 115.1 | 89.3  | 130.2 | 129.1 | 68.8  | 88.8  | 136.9 | 125.2 | 0.577420393 | 115.925 | 104.925 | 11      | 1.104836788 | 0.5145   | -1.134 |
| 92705_at   | 623.4 | 553.1 | 758   | 653.7 | 481.2 | 680.9 | 559.6 | 591.9 | 0.291197737 | 647.05  | 578.4   | 68.65   | 1.118689488 | 0.2866   | -1.12  |
| 92706_at   | 21.1  | 55.5  | 55.7  | 33.4  | 58.2  | 76    | 94.3  | 62.9  | 0.037174676 | 41.425  | 72.85   | 31.425  | 0.56863418  | 0.05179  | 1.863  |
| 92707_at   | 19.1  | 8.2   | 3.4   | 6.3   | 11    | 7.4   | 12.4  | 5.5   | 0.965169888 | 9.25    | 9.075   | 0.175   | 1.019283747 | 0.7671   | 1.133  |
| 92708_at   | 303.5 | 238.7 | 284.6 | 346   | 267.4 | 338.1 | 355.4 | 367.1 | 0.264505022 | 293.2   | 332     | 38.8    | 0.88313253  | 0.2779   | 1.134  |
| 92710_at   | 215.3 | 213.8 | 182.5 | 170.4 | 243.6 | 240   | 189.9 | 206.1 | 0.208618638 | 195.5   | 219.9   | 24.4    | 0.889040473 | 0.2115   | 1.125  |
| 92711_at   | 191.3 | 147.4 | 142.1 | 155.4 | 123.7 | 198.6 | 100.8 | 181.2 | 0.770680361 | 159.05  | 151.075 | 7.975   | 1.05278835  | 0.6529   | -1.085 |
| 92712_at   | 109.2 | 42.8  | 63.2  | 71.3  | 45.3  | 133.5 | 62.7  | 75    | 0.762710435 | 71.625  | 79.125  | 7.5     | 0.90521327  | 0.8094   | 1.078  |
| 92713_at   | 16.5  | 17.5  | 7.8   | 10.9  | 10    | 14.9  | 5.2   | 11    | 0.379026632 | 13.175  | 10.275  | 2.9     | 1.282238443 | 0.4042   | -1.299 |
| 92714_at   | 21.2  | 23.1  | 17    | 38.1  | 14.9  | 49.1  | 53.8  | 21.1  | 0.409747496 | 24.85   | 34.725  | 9.875   | 0.71562275  | 0.5261   | 1.273  |
| 92715_at   | 29.2  | 31.2  | 16.9  | 12.1  | 10    | 33    | 10.8  | 5.1   | 0.367157161 | 22.35   | 14.725  | 7.625   | 1.517826825 | 0.2437   | -1.788 |



|            |        |        |        |        |        |        |        |        |             |         |          |         |             |          |        |
|------------|--------|--------|--------|--------|--------|--------|--------|--------|-------------|---------|----------|---------|-------------|----------|--------|
| 92717_at   | 4.7    | 24.4   | 8.2    | 21.7   | 10.2   | 21.6   | 15.7   | 3.8    | 0.766726745 | 14.75   | 12.825   | 1.925   | 1.150097466 | 0.8476   | -1.116 |
| 92718_at   | 237    | 325.5  | 176.3  | 237    | 334.6  | 230.4  | 211.7  | 316.8  | 0.523097014 | 243.95  | 273.375  | 29.425  | 0.892363969 | 0.5115   | 1.125  |
| 92722_f_at | 14.7   | 10.8   | 4.8    | 11.2   | 7.4    | 12.1   | 9.5    | 39.5   | 0.442667878 | 10.375  | 17.125   | 6.75    | 0.605839416 | 0.4658   | 1.41   |
| 92724_at   | 329    | 330.8  | 232.3  | 358.2  | 512    | 417.3  | 328    | 419.7  | 0.065915104 | 312.575 | 419.25   | 106.675 | 0.745557543 | 0.06829  | 1.342  |
| 92725_at   | 142.6  | 159.6  | 135.8  | 131.5  | 157.6  | 130.3  | 160.9  | 169.3  | 0.293437739 | 142.375 | 154.525  | 12.15   | 0.921371946 | 0.3047   | 1.083  |
| 92726_at   | 80.9   | 71.7   | 71.3   | 62.6   | 65.2   | 85.1   | 86.2   | 56.5   | 0.852920605 | 71.625  | 73.25    | 1.625   | 0.9778157   | 0.9327   | 1.01   |
| 92727_at   | 95.2   | 83.8   | 91.8   | 126    | 111.7  | 134.8  | 66.6   | 110.3  | 0.710973577 | 99.2    | 105.85   | 6.65    | 0.937175248 | 0.8034   | 1.047  |
| 92728_at   | 14.7   | 7.1    | 9.7    | 9.7    | 8.1    | 12.1   | 10     | 11.1   | 0.989532984 | 10.3    | 10.325   | 0.025   | 0.997578692 | 0.8816   | 1.027  |
| 92730_at   | 193    | 144.4  | 143.2  | 167.4  | 116.8  | 132.8  | 125.4  | 162.8  | 0.125470585 | 162     | 134.45   | 27.55   | 1.204908888 | 0.1126   | -1.205 |
| 92731_at   | 127.7  | 78     | 73.1   | 88.4   | 128.1  | 157.6  | 117.8  | 89.5   | 0.145038058 | 91.8    | 123.25   | 31.45   | 0.744827586 | 0.131    | 1.349  |
| 92732_at   | 11     | 45.6   | 3      | 4.2    | 3.5    | 16.9   | 13.3   | 5.7    | 0.596546835 | 15.95   | 9.85     | 6.1     | 1.61928934  | 0.913    | -1.085 |
| 92733_at   | 3.5    | 3      | 3.2    | 2.2    | 3.9    | 15     | 18.7   | 14.8   | 0.049950133 | 2.975   | 13.1     | 10.125  | 0.227099237 | 0.01099  | 3.867  |
| 92734_at   | 5.1    | 4.9    | 13.7   | 3.2    | 17.8   | 35.8   | 2.9    | 13.3   | 0.219299776 | 6.725   | 17.45    | 10.725  | 0.385386819 | 0.2544   | 2.167  |
| 92735_at   | 19.1   | 22.3   | 24.4   | 11     | 13     | 35.7   | 15     | 36.3   | 0.452324105 | 19.2    | 25       | 5.8     | 0.768       | 0.5692   | 1.219  |
| 92736_at   | 132.4  | 80     | 119.3  | 126    | 129.1  | 186.7  | 161.7  | 140.2  | 0.060675654 | 114.425 | 154.425  | 40      | 0.740974583 | 0.07084  | 1.362  |
| 92737_at   | 6.9    | 3      | 4.1    | 6.4    | 6      | 10.2   | 7.7    | 7      | 0.088115676 | 5.1     | 7.725    | 2.625   | 0.660194175 | 0.08886  | 1.573  |
| 92738_at   | 475.6  | 421.4  | 481.7  | 533.3  | 335.2  | 329.6  | 296.9  | 306.3  | 0.0029926   | 478     | 317      | 161     | 1.507886435 | 0.00035  | -1.505 |
| 92739_at   | 16.8   | 15.3   | 7.5    | 4.2    | 3.8    | 8.4    | 2.9    | 3.7    | 0.129902799 | 10.95   | 4.7      | 6.25    | 2.329787234 | 0.09386  | -2.206 |
| 92740_at   | 1.6    | 1.9    | 1.3    | 0.9    | 1.2    | 10     | 1.8    | 2.4    | 0.325475759 | 1.425   | 3.85     | 2.425   | 0.37012987  | 0.2239   | 1.944  |
| 92741_g_at | 13.5   | 10.7   | 7.4    | 9      | 10     | 11.1   | 12.3   | 6.1    | 0.888031872 | 10.15   | 9.875    | 0.275   | 1.027848101 | 0.8556   | -1.039 |
| 92742_at   | 4.8    | 22.5   | 26.2   | 5.5    | 20.7   | 14     | 14.2   | 4.7    | 0.843705476 | 14.75   | 13.4     | 1.35    | 1.100746269 | 0.9274   | 1.054  |
| 92743_at   | 69.3   | 62.5   | 40.5   | 49.2   | 41.9   | 104.8  | 33.9   | 69.9   | 0.696878719 | 55.375  | 62.625   | 7.25    | 0.884231537 | 0.8745   | 1.048  |
| 92744_at   | 78.8   | 67.4   | 61.1   | 39.4   | 55.9   | 69.2   | 53.2   | 64.7   | 0.923594073 | 61.675  | 60.75    | 0.925   | 1.015226337 | 0.9487   | 1.011  |
| 92745_at   | 76.1   | 60.6   | 42.2   | 81.5   | 39.9   | 63.4   | 77.9   | 74.8   | 0.931841473 | 65.1    | 64       | 1.1     | 1.0171875   | 0.9333   | -1.019 |
| 92746_at   | 131.4  | 122.3  | 131.5  | 129.4  | 193.6  | 148.7  | 155.8  | 179.6  | 0.027038382 | 128.65  | 169.425  | 40.775  | 0.759333038 | 0.005463 | 1.31   |
| 92747_at   | 44.1   | 22.8   | 18.9   | 16.2   | 19.5   | 24.8   | 18.8   | 17.9   | 0.474639715 | 25.5    | 20.25    | 5.25    | 1.259259259 | 0.5162   | -1.173 |
| 92749_at   | 208    | 242.4  | 188.8  | 169.5  | 192.2  | 275.9  | 199.7  | 148.3  | 0.954391617 | 202.175 | 204.025  | 1.85    | 0.990932484 | 0.9653   | -1.007 |
| 92750_s_at | 6.3    | 5.5    | 5.3    | 8.2    | 8.1    | 6.3    | 7.4    | 5.4    | 0.612969082 | 6.325   | 6.8      | 0.475   | 0.930147059 | 0.5883   | 1.08   |
| 92751_i_at | 32     | 20.2   | 13.6   | 22.3   | 5.1    | 24.6   | 5.8    | 9.7    | 0.122049436 | 22.025  | 11.3     | 10.725  | 1.949115044 | 0.08233  | -2.295 |
| 92752_r_at | 31.9   | 22.8   | 52.2   | 68.6   | 38.8   | 86.9   | 58.2   | 50.1   | 0.353012601 | 43.875  | 58.5     | 14.625  | 0.75        | 0.3077   | 1.395  |
| 92753_at   | 54.4   | 23.7   | 34.9   | 46.4   | 57.5   | 49.5   | 37.4   | 65.3   | 0.211209185 | 39.85   | 52.425   | 12.575  | 0.760133524 | 0.217    | 1.351  |
| 92754_at   | 1553.4 | 1383.9 | 1213.7 | 1173.6 | 1366.4 | 1131.3 | 1190.6 | 1269.5 | 0.405940149 | 1331.15 | 1239.45  | 91.7    | 1.073984429 | 0.4086   | -1.07  |
| 92755_f_at | 2496.4 | 2272.1 | 1513.2 | 1428.5 | 2622   | 2347.5 | 2150   | 1838.8 | 0.367302223 | 1927.55 | 2239.575 | 312.025 | 0.860676691 | 0.3245   | 1.187  |
| 92756_r_at | 2905.3 | 2431.7 | 2248.8 | 1521.4 | 2508.7 | 2563.3 | 2009   | 1834.9 | 0.893448633 | 2276.8  | 2228.975 | 47.825  | 1.02145605  | 0.9766   | 1.005  |
| 92757_at   | 17.8   | 31.9   | 42.6   | 79.7   | 26.2   | 21     | 18.7   | 8.2    | 0.160726415 | 43      | 18.525   | 24.475  | 2.321187584 | 0.0996   | -2.185 |
| 92758_at   | 168.9  | 227.4  | 241    | 282.7  | 193.5  | 310.2  | 256    | 286.6  | 0.395714539 | 230     | 261.575  | 31.575  | 0.879288923 | 0.4162   | 1.139  |
| 92759_at   | 16.7   | 24.9   | 35.6   | 16.5   | 20     | 22     | 27.9   | 25.8   | 0.922908329 | 23.425  | 23.925   | 0.5     | 0.979101358 | 0.7502   | 1.068  |
| 92760_at   | 36.8   | 100.8  | 96.9   | 97.3   | 86.3   | 54.8   | 85.1   | 66.7   | 0.599163449 | 82.95   | 73.225   | 9.725   | 1.132809833 | 0.8129   | -1.069 |
| 92761_at   | 17     | 25.3   | 29.4   | 47.6   | 6.3    | 13.9   | 16     | 49.6   | 0.500533539 | 29.825  | 21.45    | 8.375   | 1.39044289  | 0.3006   | -1.711 |
| 92762_at   | 23.9   | 5.6    | 21.1   | 8.6    | 26.5   | 16.6   | 14.2   | 17.6   | 0.490056502 | 14.8    | 18.725   | 3.925   | 0.790387183 | 0.3519   | 1.46   |
| 92763_at   | 50.7   | 26.2   | 49.4   | 31.8   | 28.4   | 41     | 55.2   | 38.8   | 0.87833225  | 39.525  | 40.85    | 1.325   | 0.967564259 | 0.8421   | 1.045  |
| 92764_at   | 171.6  | 130.5  | 160.3  | 149.6  | 167.9  | 212.8  | 137.8  | 169.3  | 0.33666639  | 153     | 171.95   | 18.95   | 0.889793545 | 0.3412   | 1.116  |
| 92765_s_at | 34.8   | 76.4   | 53.9   | 61.1   | 47.5   | 93.4   | 49     | 68.1   | 0.585367964 | 56.55   | 64.5     | 7.95    | 0.876744186 | 0.5879   | 1.14   |
| 92766_at   | 274.2  | 206.3  | 203.8  | 192.8  | 235.4  | 324.5  | 183.4  | 101.8  | 0.881344623 | 219.275 | 211.275  | 8       | 1.037865341 | 0.6819   | -1.117 |
| 92767_at   | 250.6  | 404    | 579.1  | 516.8  | 530.2  | 407.5  | 684.6  | 451.2  | 0.426101968 | 437.625 | 518.375  | 80.75   | 0.844224741 | 0.3989   | 1.218  |
| 92768_s_at | 603.6  | 1053.8 | 731.9  | 374.7  | 684.8  | 1038.3 | 345.5  | 522.6  | 0.839706665 | 691     | 647.8    | 43.2    | 1.066687249 | 0.8166   | -1.08  |
| 92769_at   | 897    | 797.1  | 1096.9 | 1045.9 | 736.4  | 872.8  | 669    | 742.9  | 0.052863722 | 959.225 | 755.275  | 203.95  | 1.270034094 | 0.04194  | -1.266 |
| 92770_at   | 3239.3 | 4323.2 | 3284.2 | 2734.3 | 3557.9 | 3297.5 | 3835.7 | 3445.5 | 0.715153586 | 3395.25 | 3534.15  | 138.9   | 0.960697763 | 0.6194   | 1.054  |
| 92771_at   | 2303.3 | 2504.6 | 3028.4 | 2661.1 | 2946.6 | 2496.3 | 2463.7 | 2400.6 | 0.818268148 | 2624.35 | 2576.8   | 47.55   | 1.01845312  | 0.83     | -1.017 |
| 92773_at   | 485.7  | 809    | 820.8  | 750.5  | 1030.3 | 900.9  | 1082.2 | 978.9  | 0.028405267 | 716.5   | 998.075  | 281.575 | 0.717881923 | 0.03588  | 1.42   |
| 92774_at   | 69.6   | 71.1   | 63     | 132.6  | 26.5   | 56.5   | 107.2  | 81.4   | 0.520688867 | 84.075  | 67.9     | 16.175  | 1.238217968 | 0.4388   | -1.334 |
| 92775_at   | 1168.2 | 1427.2 | 1435.9 | 1407.1 | 1686.6 | 1161.4 | 1066.8 | 1606   | 0.908547853 | 1359.6  | 1380.2   | 20.6    | 0.985074627 | 0.9941   | 1.001  |
| 92777_at   | 102.4  | 104.6  | 138.5  | 124.2  | 101.5  | 108.9  | 130.2  | 122    | 0.87429088  | 117.425 | 115.65   | 1.775   | 1.015348033 | 0.8997   | 1.012  |
| 92778_i_at | 569.9  | 524.9  | 485.1  | 675.4  | 435.5  | 663.5  | 586.3  | 518    | 0.844965416 | 563.825 | 550.825  | 13      | 1.023600962 | 0.8173   | -1.028 |
| 92779_f_at | 5.9    | 5.4    | 3.3    | 3.7    | 13.1   | 10.6   | 7.4    | 5.8    | 0.058383586 | 4.575   | 9.225    | 4.65    | 0.495934959 | 0.0249   | 1.977  |
| 92780_f_at | 11.4   | 11.9   | 6.5    | 20.7   | 7.1    | 15.4   | 14.1   | 18.1   | 0.790529721 | 12.625  | 13.675   | 1.05    | 0.92321755  | 0.7464   | 1.112  |



|            |        |         |        |        |        |        |        |        |             |          |          |         |             |         |        |
|------------|--------|---------|--------|--------|--------|--------|--------|--------|-------------|----------|----------|---------|-------------|---------|--------|
| 92781_at   | 110.8  | 68.6    | 57.3   | 123.2  | 73.6   | 109.9  | 139.5  | 106.9  | 0.435350395 | 89.975   | 107.475  | 17.5    | 0.837171435 | 0.4071  | 1.224  |
| 92782_at   | 1470.9 | 1087.6  | 1332.6 | 1325.5 | 670.2  | 948.6  | 1309.7 | 1015.7 | 0.093627847 | 1304.15  | 986.05   | 318.1   | 1.322600274 | 0.0944  | -1.352 |
| 92783_at   | 530    | 462.7   | 419.7  | 446    | 449.7  | 508.6  | 392.2  | 381.8  | 0.434794217 | 464.6    | 433.075  | 31.525  | 1.072793396 | 0.4103  | -1.076 |
| 92784_at   | 14.9   | 4.1     | 1.7    | 2.9    | 2.4    | 2.1    | 2.6    | 4.1    | 0.384498402 | 5.9      | 2.8      | 3.1     | 2.107142857 | 0.4066  | -1.544 |
| 92786_at   | 617.2  | 529.7   | 985.9  | 1074.3 | 515.6  | 434.9  | 993.1  | 753.8  | 0.514823251 | 801.775  | 674.35   | 127.425 | 1.188959739 | 0.5034  | -1.198 |
| 92787_at   | 1764.5 | 1385.8  | 1581.5 | 1701.3 | 1545.5 | 1815.6 | 1871.3 | 1945.1 | 0.173595561 | 1608.275 | 1794.375 | 186.1   | 0.896287008 | 0.1853  | 1.116  |
| 92788_f_at | 2554.3 | 3106.1  | 2629.3 | 2923.3 | 3346.3 | 3427   | 2905.1 | 3217.3 | 0.050894367 | 2803.25  | 3223.925 | 420.675 | 0.869514644 | 0.05227 | 1.151  |
| 92789_r_at | 144.4  | 169.2   | 160.2  | 299    | 232.1  | 217    | 273.4  | 302    | 0.186150045 | 193.2    | 256.125  | 62.925  | 0.75431918  | 0.1289  | 1.373  |
| 92790_at   | 1153.8 | 1042.7  | 1318.4 | 1465.6 | 1403.8 | 1067   | 1343.5 | 1395.7 | 0.655813284 | 1245.125 | 1302.5   | 57.375  | 0.955950096 | 0.6502  | 1.048  |
| 92792_at   | 5.2    | 2.8     | 4.1    | 7.9    | 4.1    | 10.3   | 4.3    | 2.7    | 0.868189796 | 5        | 5.35     | 0.35    | 0.934579439 | 0.9778  | 1.01   |
| 92793_at   | 504.4  | 585.9   | 835.7  | 775.3  | 703.7  | 605.1  | 819.1  | 894    | 0.457171605 | 675.325  | 755.475  | 80.15   | 0.893907806 | 0.4367  | 1.13   |
| 92794_f_at | 289.6  | 356.5   | 382.3  | 401.5  | 455    | 354.6  | 415    | 393.4  | 0.195494677 | 357.475  | 404.5    | 47.025  | 0.883745365 | 0.2026  | 1.135  |
| 92795_at   | 282.1  | 380.5   | 452.9  | 562.1  | 453.4  | 346.4  | 471.1  | 580.5  | 0.589382853 | 419.4    | 462.85   | 43.45   | 0.906125095 | 0.5534  | 1.12   |
| 92796_at   | 425.5  | 351.2   | 292.1  | 375.7  | 226.1  | 284.5  | 229.8  | 263.1  | 0.020026881 | 361.125  | 250.875  | 110.25  | 1.439461883 | 0.00952 | -1.433 |
| 92797_at   | 942.6  | 1050.1  | 1353.4 | 1643.4 | 1071.5 | 886.5  | 1204.5 | 1301.4 | 0.503852976 | 1247.375 | 1115.975 | 131.4   | 1.117744573 | 0.5403  | -1.103 |
| 92798_at   | 4869.8 | 5851.3  | 4865   | 5348.1 | 5088.4 | 4266.4 | 5342   | 4842.3 | 0.329689397 | 5233.55  | 4884.775 | 348.775 | 1.071400423 | 0.3294  | -1.072 |
| 92799_g_at | 8971   | 10404.3 | 7088.5 | 7302.8 | 8557.9 | 7302.7 | 7478.8 | 6897.3 | 0.357697652 | 8441.65  | 7559.175 | 882.475 | 1.116742237 | 0.3567  | -1.106 |
| 92800_i_at | 9102.7 | 10608   | 7304.6 | 7436.2 | 9354.7 | 7199.6 | 7316.5 | 7909.5 | 0.501976727 | 8612.875 | 7945.075 | 667.8   | 1.08405207  | 0.514   | -1.077 |
| 92801_at   | 182.4  | 180.7   | 257    | 309    | 194.4  | 139    | 309.2  | 185.3  | 0.615543404 | 232.275  | 206.975  | 25.3    | 1.122236985 | 0.5586  | -1.14  |
| 92802_s_at | 615    | 486.2   | 477.1  | 684.6  | 293.3  | 525.8  | 690.7  | 397.6  | 0.41379086  | 565.725  | 476.85   | 88.875  | 1.186379365 | 0.3462  | -1.232 |
| 92803_at   | 34.7   | 116.5   | 94.6   | 73.9   | 50.8   | 132.4  | 87.5   | 101    | 0.611331327 | 79.925   | 92.925   | 13      | 0.860102233 | 0.5956  | 1.204  |
| 92804_at   | 1170.2 | 1252.9  | 1067   | 1085.5 | 1157.3 | 1027.8 | 962.3  | 922.9  | 0.109093663 | 1143.9   | 1017.575 | 126.325 | 1.124143184 | 0.1024  | -1.126 |
| 92805_s_at | 352.8  | 595     | 487.1  | 468.8  | 398.5  | 514.3  | 369.2  | 472.3  | 0.557926751 | 475.925  | 438.575  | 37.35   | 1.085162173 | 0.5975  | -1.076 |
| 92806_at   | 1524.3 | 1290.1  | 1279.4 | 957.9  | 1537.2 | 1380.5 | 1352   | 1468   | 0.241980045 | 1262.925 | 1434.425 | 171.5   | 0.880439898 | 0.2155  | 1.15   |
| 92807_at   | 7773.4 | 7792    | 6508.3 | 6742   | 8016.6 | 7702.2 | 9015.8 | 8243.9 | 0.056732592 | 7203.925 | 8244.625 | 1040.7  | 0.873772306 | 0.05586 | 1.146  |
| 92808_f_at | 2721.9 | 2744.3  | 3102.9 | 2600.2 | 2985.9 | 3083.2 | 2674.8 | 2595.7 | 0.79937366  | 2792.325 | 2834.9   | 42.575  | 0.984981834 | 0.8027  | 1.015  |
| 92809_r_at | 991.4  | 1013.8  | 1298.6 | 1215   | 1195.4 | 1312.2 | 1176.5 | 1330.7 | 0.211110665 | 1129.7   | 1253.7   | 124     | 0.901092765 | 0.1888  | 1.116  |
| 92810_at   | 1925.5 | 1820.3  | 1934.4 | 1748.3 | 1995.5 | 1854.5 | 1884.4 | 1881.8 | 0.425383183 | 1857.125 | 1904.05  | 46.925  | 0.975355164 | 0.4158  | 1.026  |
| 92811_at   | 26.2   | 5.7     | 21.5   | 20     | 3      | 35.1   | 5.7    | 10.3   | 0.598289473 | 18.35    | 13.525   | 4.825   | 1.356746765 | 0.3871  | -1.793 |
| 92812_f_at | 238.1  | 219.9   | 293.1  | 170.7  | 326.3  | 336.1  | 266.7  | 111.3  | 0.632613349 | 230.45   | 260.1    | 29.65   | 0.886005383 | 0.8544  | 1.056  |
| 92813_at   | 13.6   | 12.3    | 0.8    | 6.6    | 9      | 15.7   | 11.6   | 12.5   | 0.294180902 | 8.325    | 12.2     | 3.875   | 0.682377049 | 0.285   | 2.185  |
| 92814_at   | 2.3    | 2       | 0.6    | 1.5    | 1      | 3.6    | 0.4    | 1.7    | 0.928168856 | 1.6      | 1.675    | 0.075   | 0.955223881 | 0.7897  | -1.163 |
| 92816_r_at | 633.2  | 1064.7  | 1111.8 | 880.7  | 1213.3 | 920.6  | 972.4  | 895.2  | 0.576605508 | 922.6    | 1000.375 | 77.775  | 0.922254155 | 0.5306  | 1.102  |
| 92817_at   | 4413.4 | 4454.2  | 3348.9 | 2721.6 | 4041.5 | 4247.6 | 2848.2 | 2937.4 | 0.712856791 | 3734.525 | 3518.675 | 215.85  | 1.061344114 | 0.7385  | -1.057 |
| 92818_at   | 496    | 466     | 625    | 703    | 525.2  | 655    | 699.6  | 617.4  | 0.471326934 | 572.5    | 624.3    | 51.8    | 0.91702707  | 0.4375  | 1.1    |
| 92820_at   | 31.3   | 65.2    | 171.4  | 263.4  | 111.2  | 56.9   | 141.1  | 117.6  | 0.665475382 | 132.825  | 106.7    | 26.125  | 1.244845361 | 0.9524  | 1.033  |
| 92821_at   | 211.7  | 274.6   | 232.5  | 218.5  | 220.2  | 237.7  | 212.1  | 216.5  | 0.450705899 | 234.325  | 221.625  | 12.7    | 1.057304005 | 0.4448  | -1.053 |
| 92824_at   | 783.7  | 700.5   | 528.4  | 457.3  | 581    | 576.1  | 403.8  | 383.2  | 0.210034591 | 617.475  | 486.025  | 131.45  | 1.270459339 | 0.209   | -1.265 |
| 92825_at   | 3.9    | 10.1    | 2.3    | 3      | 2.5    | 33.2   | 3.1    | 5.1    | 0.47417392  | 4.825    | 10.975   | 6.15    | 0.439635535 | 0.578   | 1.485  |
| 92826_at   | 668.6  | 782.6   | 660    | 744.8  | 828.5  | 748.5  | 894.9  | 780.2  | 0.063781397 | 714      | 813.025  | 99.025  | 0.878201777 | 0.06186 | 1.139  |
| 92827_at   | 53.5   | 55.9    | 45.7   | 62.6   | 32.2   | 64.7   | 103.6  | 70.4   | 0.435325329 | 54.425   | 67.725   | 13.3    | 0.803617571 | 0.5886  | 1.155  |
| 92828_at   | 1014   | 1182.4  | 1058.5 | 1288.1 | 1413.7 | 1235   | 1256.4 | 1509.3 | 0.052243317 | 1135.75  | 1353.6   | 217.85  | 0.839058806 | 0.05065 | 1.193  |
| 92829_at   | 4016.5 | 5147.1  | 4245.9 | 4424   | 5469.8 | 3990.2 | 4156.3 | 5032   | 0.653995584 | 4458.375 | 4662.075 | 203.7   | 0.956307009 | 0.677   | 1.041  |
| 92830_s_at | 197.6  | 166.3   | 215.7  | 252    | 145    | 201.9  | 97.5   | 148.4  | 0.077149692 | 207.9    | 148.2    | 59.7    | 1.402834008 | 0.0822  | -1.433 |
| 92831_at   | 502.4  | 484.5   | 529.3  | 492.7  | 931.2  | 646.4  | 981.1  | 839.6  | 0.017209186 | 502.225  | 849.575  | 347.35  | 0.591148515 | 0.00163 | 1.672  |
| 92832_at   | 282.9  | 312.9   | 285.8  | 230.5  | 183    | 360.9  | 143.3  | 232.4  | 0.396227992 | 278.025  | 229.9    | 48.125  | 1.209330144 | 0.2835  | -1.276 |
| 92833_at   | 11.2   | 40.2    | 54.5   | 36.9   | 42.7   | 19.1   | 25     | 26.6   | 0.510516108 | 35.7     | 28.35    | 7.35    | 1.259259259 | 0.7563  | -1.134 |
| 92834_at   | 2551.8 | 3532.9  | 1745.5 | 2055.1 | 2394.1 | 2617.5 | 2138.1 | 2139.1 | 0.735358133 | 2471.325 | 2322.2   | 149.125 | 1.064217122 | 0.8565  | -1.031 |
| 92835_at   | 228.5  | 206.3   | 182.1  | 219.7  | 192.4  | 269    | 186.1  | 230.5  | 0.655326275 | 209.15   | 219.5    | 10.35   | 0.95284738  | 0.6951  | 1.042  |
| 92836_at   | 4938.6 | 4931    | 5972.4 | 6016.3 | 4452   | 5505.4 | 6601.6 | 5573.5 | 0.902742362 | 5464.575 | 5533.125 | 68.55   | 0.987610979 | 0.9415  | 1.008  |
| 92837_f_at | 37.9   | 7       | 5.9    | 16.1   | 5.4    | 19.5   | 3.7    | 6.1    | 0.380894434 | 16.725   | 8.675    | 8.05    | 1.92795389  | 0.33    | -1.808 |
| 92838_at   | 1485.5 | 1558.9  | 2276.2 | 1821.3 | 1685.2 | 2174.2 | 1624.4 | 1524   | 0.889050482 | 1785.475 | 1751.95  | 33.525  | 1.01913582  | 0.9123  | 1.014  |
| 92839_f_at | 104.6  | 85.3    | 112.8  | 122.3  | 179.8  | 122.9  | 153.1  | 179.4  | 0.021145383 | 106.25   | 158.8    | 52.55   | 0.669080605 | 0.01508 | 1.49   |
| 92840_at   | 789.7  | 510.1   | 729.7  | 464.4  | 728    | 353.5  | 646.5  | 497.8  | 0.5818832   | 623.475  | 556.45   | 67.025  | 1.120451074 | 0.5677  | -1.133 |
| 92841_f_at | 54.9   | 59.8    | 31.8   | 35.7   | 49.2   | 68.5   | 34.7   | 40.4   | 0.802519545 | 45.55    | 48.2     | 2.65    | 0.945020747 | 0.793   | 1.06   |
| 92842_r_at | 11.3   | 1.9     | 1.8    | 1.4    | 6.2    | 7      | 2.4    | 1.8    | 0.931069259 | 4.1      | 4.35     | 0.25    | 0.942528736 | 0.6174  | 1.367  |



|            |        |        |        |        |        |        |        |        |             |          |          |          |             |           |        |
|------------|--------|--------|--------|--------|--------|--------|--------|--------|-------------|----------|----------|----------|-------------|-----------|--------|
| 92843_r_at | 30.7   | 53.6   | 20.6   | 20.4   | 17     | 37.5   | 16.8   | 20.3   | 0.402821525 | 31.325   | 22.9     | 8.425    | 1.36790393  | 0.3631    | -1.338 |
| 92845_at   | 1144.4 | 1156   | 1008.9 | 951.2  | 1164   | 1129   | 1067.6 | 899.5  | 0.999012513 | 1065.125 | 1065.025 | 0.1      | 1.000093895 | 0.9846    | 1.002  |
| 92846_at   | 32     | 16     | 25.1   | 29.1   | 12     | 14.1   | 23.3   | 5.1    | 0.059005707 | 25.55    | 13.625   | 11.925   | 1.875229358 | 0.08297   | -2.077 |
| 92847_s_at | 374.1  | 429.5  | 507.4  | 528.8  | 725.1  | 476.2  | 679.2  | 601.1  | 0.055264589 | 459.95   | 620.4    | 160.45   | 0.741376531 | 0.05145   | 1.345  |
| 92848_at   | 1767.6 | 1706.8 | 1660.2 | 1683.5 | 1579.2 | 1545.4 | 1918.3 | 1623.5 | 0.693649662 | 1704.525 | 1666.6   | 37.925   | 1.02275591  | 0.6288    | -1.026 |
| 92849_at   | 98.9   | 35.8   | 57.3   | 67.5   | 112.8  | 99.8   | 93     | 88.1   | 0.077556277 | 64.875   | 98.425   | 33.55    | 0.659131318 | 0.07069   | 1.61   |
| 92850_at   | 1078.2 | 1289.2 | 1386.4 | 1685.4 | 1643.2 | 1284.7 | 2041.6 | 1834.1 | 0.149010415 | 1359.8   | 1700.9   | 341.1    | 0.79945911  | 0.1522    | 1.249  |
| 92851_at   | 75.2   | 151.8  | 93.2   | 78     | 118.4  | 84.1   | 120.6  | 116.1  | 0.630541598 | 99.55    | 109.8    | 10.25    | 0.906648452 | 0.5068    | 1.138  |
| 92852_at   | 816.4  | 770.4  | 734    | 804.9  | 647    | 854.7  | 992.8  | 1015.7 | 0.341959492 | 781.425  | 877.55   | 96.125   | 0.890462082 | 0.3777    | 1.107  |
| 92853_at   | 62     | 13.1   | 10.1   | 15.9   | 3.6    | 43.2   | 3.3    | 5.8    | 0.500074072 | 25.275   | 13.975   | 11.3     | 1.808586762 | 0.2413    | -2.566 |
| 92854_at   | 2699.5 | 2756   | 2955.5 | 3036   | 2625.8 | 2880.8 | 2664   | 2871.4 | 0.370798218 | 2861.75  | 2760.5   | 101.25   | 1.036678138 | 0.3722    | -1.036 |
| 92855_at   | 1497.2 | 1969.8 | 2224.8 | 2188.6 | 2080.4 | 1671.9 | 1591.3 | 1648.5 | 0.318336713 | 1970.1   | 1748.025 | 222.075  | 1.127043378 | 0.3421    | -1.12  |
| 92856_at   | 170.1  | 182.4  | 127.8  | 135    | 148.7  | 216    | 185    | 145.5  | 0.386532544 | 153.825  | 173.8    | 19.975   | 0.885069045 | 0.384     | 1.128  |
| 92857_at   | 1559.9 | 1287.9 | 1277.5 | 1128.4 | 1282.6 | 1296.2 | 1290.8 | 1300.1 | 0.830381529 | 1313.425 | 1292.425 | 21       | 1.016248525 | 0.8934    | 1.009  |
| 92858_at   | 133.7  | 181    | 144.3  | 151.7  | 175.2  | 150.1  | 143.1  | 141.2  | 0.983617188 | 152.675  | 152.4    | 0.275    | 1.001804462 | 0.9909    | 1.001  |
| 92860_at   | 56.6   | 7.9    | 8.5    | 26.5   | 22.1   | 46.8   | 22.1   | 32.5   | 0.661954081 | 24.875   | 30.875   | 6        | 0.805668016 | 0.364     | 1.645  |
| 92861_i_at | 19.2   | 29     | 19.6   | 26.1   | 26.6   | 27.9   | 26.5   | 25.3   | 0.293691062 | 23.475   | 26.575   | 3.1      | 0.883349012 | 0.2281    | 1.152  |
| 92862_f_at | 30.5   | 18     | 18.9   | 17.5   | 23.4   | 23.8   | 20.5   | 23.4   | 0.657738229 | 21.225   | 22.775   | 1.55     | 0.93194292  | 0.5063    | 1.1    |
| 92863_at   | 999.2  | 1150.5 | 1439.6 | 1190   | 985.3  | 1066.2 | 827.4  | 899.3  | 0.065643341 | 1194.825 | 944.55   | 250.275  | 1.264967445 | 0.04787   | -1.26  |
| 92864_at   | 91.1   | 29.3   | 51.1   | 78.2   | 64     | 99.1   | 67.8   | 67.3   | 0.485950481 | 62.425   | 74.55    | 12.125   | 0.837357478 | 0.3969    | 1.284  |
| 92865_at   | 16.8   | 10.5   | 7.3    | 7      | 28.4   | 15.1   | 10.9   | 31.7   | 0.111683844 | 10.4     | 21.525   | 11.125   | 0.483159117 | 0.07538   | 2.016  |
| 92866_at   | 44.3   | 167.5  | 92.7   | 59.6   | 404.9  | 347.7  | 320.4  | 287.7  | 0.000542814 | 91.025   | 340.175  | 249.15   | 0.267582862 | 0.00291   | 4.217  |
| 92867_at   | 260.3  | 286.1  | 226.9  | 372.8  | 285.2  | 92.2   | 200.1  | 234    | 0.158085965 | 286.525  | 202.875  | 83.65    | 1.412322859 | 0.1793    | -1.504 |
| 92868_at   | 134.8  | 104    | 67.2   | 88.7   | 93.7   | 124.9  | 91.6   | 82.8   | 0.980912932 | 98.675   | 98.25    | 0.425    | 1.0043257   | 0.9308    | 1.016  |
| 92869_at   | 16.1   | 26.8   | 18.7   | 4.2    | 14.6   | 34     | 14.3   | 20.3   | 0.532338445 | 16.45    | 20.8     | 4.35     | 0.790865385 | 0.4531    | 1.44   |
| 92870_at   | 406.9  | 331.9  | 538.2  | 593.6  | 322.1  | 428.7  | 576.5  | 590.8  | 0.89663733  | 467.65   | 479.525  | 11.875   | 0.975235911 | 0.9157    | 1.022  |
| 92871_at   | 152.1  | 173.3  | 220    | 306.6  | 170.9  | 210.7  | 270    | 302.3  | 0.593772273 | 213      | 238.475  | 25.475   | 0.893175385 | 0.5528    | 1.134  |
| 92872_at   | 764.4  | 622    | 627.9  | 670.1  | 566.6  | 693    | 603.9  | 679.9  | 0.460813152 | 671.1    | 635.85   | 35.25    | 1.055437603 | 0.4557    | -1.055 |
| 92873_f_at | 13.4   | 9.5    | 28.1   | 4.5    | 23.4   | 61.9   | 25.5   | 7.5    | 0.277865131 | 13.875   | 29.575   | 15.7     | 0.469146238 | 0.2632    | 2.036  |
| 92874_f_at | 1146.7 | 1071.4 | 939    | 1086.8 | 1114.4 | 1125.3 | 1001   | 1017.6 | 0.949508066 | 1060.975 | 1064.575 | 3.6      | 0.996618369 | 0.9319    | 1.005  |
| 92875_s_at | 398.9  | 345.8  | 367.6  | 368.7  | 321    | 321.5  | 333.6  | 342.9  | 0.025521054 | 370.25   | 329.75   | 40.5     | 1.122820318 | 0.0136    | -1.122 |
| 92876_at   | 88.6   | 62.8   | 94.1   | 76.4   | 93.7   | 113.8  | 99.9   | 113.5  | 0.031078806 | 80.475   | 105.225  | 24.75    | 0.764789736 | 0.03526   | 1.319  |
| 92877_at   | 231.1  | 358.3  | 346.1  | 518.8  | 272.1  | 351.5  | 452.3  | 532.8  | 0.655170095 | 363.575  | 402.175  | 38.6     | 0.904021881 | 0.6381    | 1.116  |
| 92878_at   | 240.3  | 176.1  | 191.1  | 245.2  | 212    | 248.1  | 244.7  | 235.4  | 0.314335514 | 213.175  | 235.05   | 21.875   | 0.906934695 | 0.283     | 1.112  |
| 92879_at   | 625.9  | 666.3  | 942.8  | 944.1  | 867.5  | 759.7  | 874.1  | 894.4  | 0.587583704 | 794.775  | 848.925  | 54.15    | 0.936213446 | 0.507     | 1.085  |
| 92880_at   | 4680.4 | 4651.4 | 4362.5 | 3918.8 | 5172.6 | 5868.4 | 4102.3 | 4667.8 | 0.251873476 | 4403.275 | 4952.775 | 549.5    | 0.889052097 | 0.2449    | 1.118  |
| 92881_at   | 131.6  | 119.7  | 116.4  | 108.3  | 106.5  | 198.3  | 129.6  | 130    | 0.350766134 | 119      | 141.1    | 22.1     | 0.843373494 | 0.3285    | 1.157  |
| 92882_at   | 607.9  | 628.1  | 920.2  | 973    | 651    | 702.4  | 975.6  | 851.4  | 0.91918616  | 782.3    | 795.1    | 12.8     | 0.983901396 | 0.87      | 1.027  |
| 92883_at   | 7.6    | 8.5    | 4.2    | 12.3   | 20.3   | 19.7   | 5.1    | 12.3   | 0.187414277 | 8.15     | 14.35    | 6.2      | 0.567944251 | 0.242     | 1.66   |
| 92884_at   | 3558.6 | 3329.2 | 4966.1 | 4396.2 | 3191.2 | 2312.2 | 2944.1 | 2994.1 | 0.041805227 | 4062.525 | 2860.4   | 1202.125 | 1.420264648 | 0.02527   | -1.412 |
| 92885_at   | 40.8   | 10.5   | 38.4   | 38.2   | 24.6   | 28.8   | 25.9   | 16.6   | 0.357468919 | 31.975   | 23.975   | 8        | 1.333680918 | 0.6275    | -1.197 |
| 92887_at   | 2305.5 | 2430.4 | 2293.5 | 2039.3 | 2284.3 | 2058.4 | 2487.2 | 2460.1 | 0.682220374 | 2267.175 | 2322.5   | 55.325   | 0.976178687 | 0.6978    | 1.024  |
| 92888_s_at | 386.5  | 375.7  | 559.5  | 542.3  | 643.2  | 353.6  | 417.3  | 482    | 0.922849471 | 466      | 474.025  | 8.025    | 0.983070513 | 0.9565    | 1.009  |
| 92889_r_at | 8.6    | 4.3    | 2.7    | 6.1    | 4.8    | 20.1   | 3.7    | 4.8    | 0.521210233 | 5.425    | 8.35     | 2.925    | 0.649700599 | 0.5854    | 1.3    |
| 92890_at   | 16.3   | 9      | 23.3   | 30.6   | 5.3    | 12.2   | 8.8    | 11     | 0.105085288 | 19.8     | 9.325    | 10.475   | 2.123324397 | 0.07254   | -2.021 |
| 92891_f_at | 69.6   | 98.9   | 88.4   | 104.6  | 68.9   | 85.1   | 107.9  | 113.6  | 0.795978259 | 90.375   | 93.875   | 3.5      | 0.962716378 | 0.8436    | 1.031  |
| 92892_at   | 53.2   | 40.9   | 22.5   | 47.2   | 46.4   | 62.8   | 48.5   | 52     | 0.194576977 | 40.95    | 52.425   | 11.475   | 0.78111588  | 0.203     | 1.336  |
| 92893_at   | 85.7   | 167    | 195.9  | 195    | 153.5  | 97.1   | 207.1  | 163.1  | 0.873998577 | 160.9    | 155.2    | 5.7      | 1.036726804 | 0.9381    | -1.021 |
| 92894_s_at | 53.2   | 54.5   | 71.6   | 13.6   | 15.7   | 60.9   | 15.2   | 29.1   | 0.312511144 | 48.225   | 30.225   | 18       | 1.595533499 | 0.3748    | -1.609 |
| 92895_at   | 28.3   | 25.2   | 15.9   | 16.1   | 16.3   | 32.7   | 19.1   | 18.8   | 0.945205063 | 21.375   | 21.725   | 0.35     | 0.983889528 | 0.9594    | 1.011  |
| 92896_s_at | 12.2   | 6.5    | 4.5    | 3.8    | 3.9    | 4.5    | 5.3    | 4.4    | 0.328411446 | 6.75     | 4.525    | 2.225    | 1.491712707 | 0.3039    | -1.349 |
| 92897_at   | 10.2   | 7.5    | 1.7    | 11.4   | 12.8   | 20     | 2.9    | 6.2    | 0.553474452 | 7.7      | 10.475   | 2.775    | 0.735083532 | 0.6599    | 1.326  |
| 92898_at   | 143.1  | 160.8  | 156.2  | 143.7  | 281.3  | 237.6  | 266    | 243    | 0.000590435 | 150.95   | 256.975  | 106.025  | 0.587411227 | 0.0000374 | 1.701  |
| 92899_at   | 4.1    | 4.3    | 3.3    | 2.3    | 3.6    | 8.1    | 2.3    | 1.8    | 0.781365386 | 3.5      | 3.95     | 0.45     | 0.886075949 | 0.9247    | 1.037  |
| 92900_at   | 82     | 49.7   | 64.5   | 95.7   | 105.5  | 60.1   | 99.6   | 132.7  | 0.198954531 | 72.975   | 99.475   | 26.5     | 0.733601407 | 0.2213    | 1.351  |
| 92901_at   | 282.7  | 245.5  | 369.2  | 390.7  | 108.8  | 141    | 173.7  | 190.4  | 0.009470228 | 322.025  | 153.475  | 168.55   | 2.098224467 | 0.004146  | -2.108 |



|            |        |        |        |        |        |       |        |        |             |          |         |          |             |           |        |
|------------|--------|--------|--------|--------|--------|-------|--------|--------|-------------|----------|---------|----------|-------------|-----------|--------|
| 92902_at   | 48.9   | 25.2   | 20.9   | 36.7   | 28.2   | 23.3  | 25.9   | 29.8   | 0.405856074 | 32.925   | 26.8    | 6.125    | 1.228544776 | 0.4607    | -1.168 |
| 92903_at   | 69.3   | 13.1   | 12.2   | 30.3   | 14     | 63.8  | 17.7   | 15.1   | 0.849241366 | 31.225   | 27.65   | 3.575    | 1.129294756 | 0.883     | -1.087 |
| 92904_at   | 36.1   | 35.6   | 35.2   | 57.8   | 50.1   | 43.7  | 50.5   | 57.7   | 0.201691939 | 41.175   | 50.5    | 9.325    | 0.815346535 | 0.1457    | 1.25   |
| 92905_at   | 3.5    | 5.3    | 2.9    | 7.7    | 4.6    | 3.5   | 3      | 5.4    | 0.577267254 | 4.85     | 4.125   | 0.725    | 1.175757576 | 0.6902    | -1.114 |
| 92906_at   | 19.4   | 35.7   | 4.5    | 5.4    | 22.8   | 31.5  | 41.5   | 31.3   | 0.125197917 | 16.25    | 31.775  | 15.525   | 0.51140834  | 0.09962   | 2.727  |
| 92907_at   | 187.2  | 264.5  | 238.4  | 220.5  | 17.4   | 34.2  | 38.4   | 41.7   | 0.00054996  | 227.65   | 32.925  | 194.725  | 6.914198937 | 0.0000847 | -7.231 |
| 92908_at   | 186.5  | 161.6  | 209.6  | 304    | 165    | 170.8 | 187.1  | 231.8  | 0.479244349 | 215.425  | 188.675 | 26.75    | 1.14177819  | 0.494     | -1.12  |
| 92909_at   | 177.8  | 98.2   | 117.3  | 129    | 136.1  | 93    | 104.1  | 165    | 0.806422242 | 130.575  | 124.55  | 6.025    | 1.048374147 | 0.7957    | -1.05  |
| 92910_at   | 40.3   | 25.1   | 35.1   | 66.7   | 44.3   | 27.1  | 26.6   | 33.3   | 0.408345525 | 41.8     | 32.825  | 8.975    | 1.27341965  | 0.4265    | -1.222 |
| 92911_at   | 10.9   | 18.5   | 4.8    | 7.7    | 13.2   | 5     | 3.4    | 5.6    | 0.35853666  | 10.475   | 6.8     | 3.675    | 1.540441176 | 0.309     | -1.569 |
| 92912_at   | 140    | 98.2   | 96.7   | 116.4  | 65.3   | 117.3 | 120.1  | 83.9   | 0.372737201 | 112.825  | 96.65   | 16.175   | 1.167356441 | 0.3435    | -1.19  |
| 92913_at   | 61.5   | 77.6   | 94.4   | 84.9   | 66.2   | 111.4 | 70.5   | 92.1   | 0.681456131 | 79.6     | 85.05   | 5.45     | 0.935920047 | 0.7242    | 1.058  |
| 92914_at   | 184.7  | 114.8  | 177.1  | 180.9  | 158.9  | 218.4 | 147    | 218    | 0.43338694  | 164.375  | 185.575 | 21.2     | 0.885760474 | 0.4545    | 1.131  |
| 92915_s_at | 207.4  | 143.7  | 149.6  | 196.6  | 137.3  | 262.6 | 179.6  | 161.1  | 0.746723483 | 174.325  | 185.15  | 10.825   | 0.941533891 | 0.8032    | 1.044  |
| 92916_at   | 373.5  | 237.2  | 246.1  | 242.4  | 286.5  | 383.2 | 149.4  | 277.8  | 0.992477663 | 274.8    | 274.225 | 0.575    | 1.002096818 | 0.8754    | -1.038 |
| 92917_at   | 4.4    | 6.4    | 5.4    | 4.2    | 8.3    | 10.4  | 8.4    | 7      | 0.009032409 | 5.1      | 8.525   | 3.425    | 0.598240469 | 0.006477  | 1.675  |
| 92918_at   | 72.2   | 54.4   | 40.1   | 44.4   | 46.9   | 90.3  | 45.1   | 45.5   | 0.76454549  | 52.775   | 56.95   | 4.175    | 0.926690079 | 0.8087    | 1.056  |
| 92919_at   | 126.8  | 132.4  | 43.8   | 97     | 87.1   | 107.9 | 55.6   | 82.5   | 0.501885615 | 100      | 83.275  | 16.725   | 1.200840588 | 0.6822    | -1.133 |
| 92920_at   | 151.7  | 30.3   | 77.8   | 66.3   | 96.5   | 102.6 | 67.5   | 36.2   | 0.852333956 | 81.525   | 75.7    | 5.825    | 1.076948481 | 0.9903    | 1.005  |
| 92921_at   | 50.1   | 35.8   | 23.1   | 29.7   | 36.7   | 72.1  | 23.1   | 30.3   | 0.655110402 | 34.675   | 40.55   | 5.875    | 0.855117139 | 0.7403    | 1.107  |
| 92922_at   | 63.8   | 74.5   | 55.1   | 64.9   | 82     | 86.5  | 49.7   | 93.6   | 0.271894324 | 64.575   | 77.95   | 13.375   | 0.828415651 | 0.3291    | 1.18   |
| 92923_g_at | 99.6   | 24.7   | 43.5   | 63.4   | 49.7   | 65.9  | 23.4   | 12.9   | 0.364263425 | 57.8     | 37.975  | 19.825   | 1.522053983 | 0.3483    | -1.617 |
| 92924_at   | 8.3    | 12.7   | 4.4    | 5.4    | 5.5    | 19.8  | 4.6    | 3.5    | 0.885718633 | 7.7      | 8.35    | 0.65     | 0.922155689 | 0.8474    | -1.095 |
| 92925_at   | 406.7  | 592.6  | 667    | 782.9  | 599.7  | 794.7 | 773.5  | 926.7  | 0.171753299 | 612.3    | 773.65  | 161.35   | 0.791443159 | 0.1835    | 1.283  |
| 92926_at   | 6.6    | 7.6    | 3.5    | 5      | 3.9    | 4.9   | 4      | 4.2    | 0.21266261  | 5.675    | 4.25    | 1.425    | 1.335294118 | 0.2221    | -1.276 |
| 92927_at   | 384.6  | 299    | 331.5  | 344.1  | 293.6  | 300.7 | 284.6  | 265.6  | 0.048530486 | 339.8    | 286.125 | 53.675   | 1.187592835 | 0.0279    | -1.184 |
| 92929_at   | 41.8   | 72.6   | 83.5   | 69.4   | 93.6   | 77.9  | 67.8   | 60.9   | 0.49764246  | 66.825   | 75.05   | 8.225    | 0.890406396 | 0.478     | 1.144  |
| 92930_at   | 25.9   | 8.7    | 5.5    | 5      | 13.9   | 26.8  | 9.9    | 3.3    | 0.763808849 | 11.275   | 13.475  | 2.2      | 0.836734694 | 0.7716    | 1.192  |
| 92931_at   | 18.7   | 14.6   | 74.1   | 42     | 23.7   | 33.6  | 100.3  | 38.6   | 0.616360444 | 37.35    | 49.05   | 11.7     | 0.76146789  | 0.5299    | 1.381  |
| 92932_at   | 1397.2 | 1362.5 | 1685.6 | 1724.6 | 356.4  | 539.1 | 549.5  | 673    | 0.000223315 | 1542.475 | 529.5   | 1012.975 | 2.913078376 | 0.00031   | -2.971 |
| 92933_at   | 246.3  | 156.5  | 155.5  | 173.9  | 169.6  | 288.3 | 169.2  | 189.8  | 0.575771184 | 183.05   | 204.225 | 21.175   | 0.896315338 | 0.5608    | 1.108  |
| 92934_at   | 310.9  | 371.3  | 399.9  | 390.5  | 446.2  | 368.5 | 379.9  | 407.7  | 0.266776679 | 368.15   | 400.575 | 32.425   | 0.91905386  | 0.2692    | 1.09   |
| 92935_at   | 153.5  | 132    | 164.6  | 186.2  | 77.3   | 124.3 | 145.9  | 155.2  | 0.166225745 | 159.075  | 125.675 | 33.4     | 1.26576487  | 0.1809    | -1.3   |
| 92936_at   | 37.9   | 30.3   | 47.1   | 40.8   | 67.8   | 56.1  | 29.4   | 53.4   | 0.221543079 | 39.025   | 51.675  | 12.65    | 0.755200774 | 0.2667    | 1.282  |
| 92937_at   | 15.4   | 7.3    | 16.3   | 18.2   | 9      | 14.6  | 16.6   | 28.9   | 0.566541558 | 14.3     | 17.275  | 2.975    | 0.827785818 | 0.6335    | 1.172  |
| 92938_at   | 50.5   | 55.6   | 54.4   | 36.3   | 67.7   | 50    | 86.1   | 58.2   | 0.130630227 | 49.2     | 65.5    | 16.3     | 0.751145038 | 0.1172    | 1.321  |
| 92939_at   | 8.7    | 5.1    | 28.5   | 15.4   | 28.1   | 57.7  | 31.6   | 49.5   | 0.023413506 | 14.425   | 41.725  | 27.3     | 0.345715998 | 0.02464   | 3.379  |
| 92940_s_at | 53.2   | 25.5   | 45.8   | 34.2   | 49.7   | 44.1  | 39.2   | 44.9   | 0.50395114  | 39.675   | 44.475  | 4.8      | 0.892074199 | 0.4134    | 1.161  |
| 92941_at   | 32.7   | 73.9   | 30.4   | 62.8   | 68.3   | 66.9  | 14.5   | 74.7   | 0.740836799 | 49.95    | 56.1    | 6.15     | 0.890374332 | 0.9722    | 1.017  |
| 92942_at   | 443.5  | 431.2  | 460.1  | 460    | 529    | 613.8 | 542.8  | 470.3  | 0.051240905 | 448.7    | 538.975 | 90.275   | 0.832506146 | 0.01972   | 1.196  |
| 92943_at   | 22.6   | 17.2   | 9      | 19     | 28.9   | 27.8  | 18.3   | 38.7   | 0.06965896  | 16.95    | 28.425  | 11.475   | 0.596306069 | 0.07877   | 1.711  |
| 92944_at   | 15.6   | 52.9   | 12.3   | 44.6   | 10.7   | 31.2  | 57.8   | 13.7   | 0.84677482  | 31.35    | 28.35   | 3        | 1.105820106 | 0.808     | -1.145 |
| 92945_at   | 9.6    | 4.8    | 8      | 12.5   | 9.3    | 11.1  | 2.7    | 8.8    | 0.768377911 | 8.725    | 7.975   | 0.75     | 1.094043887 | 0.7009    | -1.167 |
| 92946_f_at | 6.1    | 3.8    | 3.3    | 3.8    | 3.5    | 7.2   | 4.6    | 19.8   | 0.316131899 | 4.25     | 8.775   | 4.525    | 0.484330484 | 0.2463    | 1.682  |
| 92947_s_at | 41.4   | 38.1   | 46.6   | 37     | 52.5   | 59    | 54.9   | 56.6   | 0.001930744 | 40.775   | 55.75   | 14.975   | 0.731390135 | 0.001549  | 1.371  |
| 92948_at   | 4.3    | 3.4    | 3.1    | 3.3    | 6.2    | 4.6   | 4.6    | 6.9    | 0.030372912 | 3.525    | 5.575   | 2.05     | 0.632286996 | 0.01154   | 1.563  |
| 92949_at   | 195.8  | 163    | 142.4  | 147.9  | 156.1  | 145.2 | 117.1  | 135.2  | 0.158713642 | 162.275  | 138.4   | 23.875   | 1.172507225 | 0.1461    | -1.17  |
| 92950_at   | 27.6   | 21.3   | 119.1  | 144.7  | 88.6   | 24.1  | 22.8   | 58.9   | 0.4438847   | 78.175   | 48.6    | 29.575   | 1.608539095 | 0.6155    | -1.371 |
| 92951_at   | 20.8   | 65.4   | 13.7   | 59.5   | 18.6   | 29.1  | 15.8   | 40.7   | 0.389721924 | 39.85    | 26.05   | 13.8     | 1.52975048  | 0.5386    | -1.335 |
| 92952_f_at | 19     | 39.5   | 35     | 57.4   | 42.9   | 72.7  | 41     | 88.6   | 0.15148059  | 37.725   | 61.3    | 23.575   | 0.615415987 | 0.1428    | 1.656  |
| 92953_at   | 21     | 20.4   | 12.1   | 27.6   | 30.8   | 22    | 14.3   | 9.6    | 0.852213535 | 20.275   | 19.175  | 1.1      | 1.057366362 | 0.7315    | -1.117 |
| 92955_at   | 75.3   | 75.1   | 99.6   | 151.4  | 54     | 55.5  | 60.1   | 85.2   | 0.132331293 | 100.35   | 63.7    | 36.65    | 1.575353218 | 0.07141   | -1.536 |
| 92956_at   | 269.3  | 215    | 356.2  | 278.8  | 229.1  | 308   | 255.2  | 303.9  | 0.874607953 | 279.825  | 274.05  | 5.775    | 1.021072797 | 0.9248    | 1.012  |
| 92957_at   | 11.9   | 13.7   | 6.6    | 11.1   | 7.6    | 14.6  | 9.3    | 7.1    | 0.625829656 | 10.825   | 9.65    | 1.175    | 1.121761658 | 0.6116    | -1.13  |
| 92958_at   | 798.1  | 836.1  | 964.3  | 1132.5 | 1133.5 | 747.2 | 1039.3 | 1001.1 | 0.685801825 | 932.75   | 980.275 | 47.525   | 0.951518706 | 0.7062    | 1.049  |
| 92959_at   | 70.2   | 69.8   | 53.9   | 47.4   | 59.8   | 74.4  | 111    | 70.6   | 0.20330132  | 60.325   | 78.95   | 18.625   | 0.764091197 | 0.1689    | 1.291  |



|            |         |         |         |        |         |         |         |         |             |          |          |         |             |          |        |
|------------|---------|---------|---------|--------|---------|---------|---------|---------|-------------|----------|----------|---------|-------------|----------|--------|
| 92960_at   | 7.7     | 25.2    | 4.9     | 2.5    | 7.2     | 11      | 5.1     | 13.8    | 0.891787272 | 10.075   | 9.275    | 0.8     | 1.086253369 | 0.7012   | 1.239  |
| 92961_at   | 66.2    | 89.3    | 111.2   | 123.4  | 60.7    | 136.6   | 73.8    | 93.4    | 0.769710929 | 97.525   | 91.125   | 6.4     | 1.070233196 | 0.7084   | -1.091 |
| 92962_at   | 89      | 85.9    | 64.3    | 96     | 73.1    | 109.4   | 80.6    | 103.7   | 0.506082787 | 83.8     | 91.7     | 7.9     | 0.913849509 | 0.5319   | 1.091  |
| 92963_at   | 373.4   | 355.9   | 430.6   | 454.6  | 384.8   | 419.9   | 466.6   | 405.6   | 0.612213944 | 403.625  | 419.225  | 15.6    | 0.962788479 | 0.5891   | 1.041  |
| 92965_at   | 38.9    | 65.1    | 105.6   | 44.1   | 99.3    | 142.6   | 79.7    | 89.8    | 0.103545949 | 63.425   | 102.85   | 39.425  | 0.616674769 | 0.08205  | 1.712  |
| 92966_g_at | 12.9    | 11.7    | 8.9     | 9.2    | 10.9    | 16.4    | 14.7    | 13.5    | 0.079796853 | 10.675   | 13.875   | 3.2     | 0.769369369 | 0.07822  | 1.302  |
| 92967_r_at | 123.9   | 118     | 369     | 294.1  | 122.8   | 145.2   | 347.6   | 194.7   | 0.779239451 | 226.25   | 202.575  | 23.675  | 1.116870295 | 0.8599   | -1.071 |
| 92968_at   | 2348.3  | 2333.9  | 2052.1  | 1807.9 | 2000.5  | 2901.1  | 1656.2  | 1449.9  | 0.718827777 | 2135.55  | 2001.925 | 133.625 | 1.066748255 | 0.5833   | -1.099 |
| 92969_at   | 320.7   | 382.4   | 401.1   | 622.9  | 344.2   | 385.2   | 659.8   | 560.6   | 0.595511261 | 431.775  | 487.45   | 55.675  | 0.885783157 | 0.5931   | 1.125  |
| 92970_at   | 4.1     | 33.4    | 14.2    | 13.6   | 2.5     | 3.6     | 7.1     | 29.1    | 0.536183016 | 16.325   | 10.575   | 5.75    | 1.543735225 | 0.3732   | -1.949 |
| 92971_at   | 160.4   | 168.9   | 199.9   | 211.3  | 264     | 135.8   | 207.8   | 231.4   | 0.453541296 | 185.125  | 209.75   | 24.625  | 0.882598331 | 0.542    | 1.108  |
| 92972_at   | 17.9    | 22.3    | 11.6    | 13.3   | 16.1    | 27.3    | 12.4    | 37      | 0.317315933 | 16.275   | 23.2     | 6.925   | 0.701508621 | 0.3409   | 1.347  |
| 92974_at   | 198.4   | 172.1   | 164.9   | 134.9  | 199.1   | 141     | 161.1   | 151.2   | 0.813991405 | 167.575  | 163.1    | 4.475   | 1.027437155 | 0.8156   | 1.027  |
| 92975_at   | 118.2   | 95.5    | 133.2   | 136.4  | 81.5    | 106     | 98.8    | 90.1    | 0.057622034 | 120.825  | 94.1     | 26.725  | 1.284006376 | 0.04911  | -1.278 |
| 92976_at   | 437.9   | 381     | 513.1   | 334.1  | 350.5   | 462.5   | 476.1   | 437.5   | 0.763220148 | 416.525  | 431.65   | 15.125  | 0.964960037 | 0.7306   | 1.042  |
| 92977_s_at | 45      | 23.1    | 29.9    | 42.3   | 14      | 37.9    | 29.1    | 29.1    | 0.332776489 | 35.075   | 27.525   | 7.55    | 1.274296094 | 0.3496   | -1.308 |
| 92978_s_at | 59      | 33.5    | 26.8    | 49.2   | 15      | 37.2    | 29.7    | 26.6    | 0.143069822 | 42.125   | 27.125   | 15      | 1.552995392 | 0.1435   | -1.558 |
| 92979_at   | 122.2   | 90.1    | 149.8   | 156.6  | 74.8    | 93.7    | 81.8    | 109.2   | 0.072357973 | 129.675  | 89.875   | 39.8    | 1.442837274 | 0.05699  | -1.425 |
| 92980_at   | 21.6    | 36.4    | 10.8    | 19.4   | 10      | 41.3    | 16.3    | 19.6    | 0.977888632 | 22.05    | 21.8     | 0.25    | 1.01146789  | 0.8851   | -1.06  |
| 92981_at   | 21.8    | 4.7     | 18.1    | 16.6   | 14.3    | 38.6    | 6.3     | 18.2    | 0.627992024 | 15.3     | 19.35    | 4.05    | 0.790697674 | 0.7368   | 1.197  |
| 92982_at   | 41.9    | 27.9    | 21.6    | 51.5   | 30.9    | 37.6    | 27.8    | 31.9    | 0.633430795 | 35.725   | 32.05    | 3.675   | 1.114664587 | 0.7884   | -1.059 |
| 92983_at   | 25.2    | 7.4     | 12.3    | 17.1   | 14.1    | 32      | 25.2    | 37.5    | 0.116716185 | 15.5     | 27.2     | 11.7    | 0.569852941 | 0.1255   | 1.816  |
| 92984_g_at | 20      | 9       | 23.9    | 21.3   | 14.2    | 26.2    | 14.7    | 28.5    | 0.654530906 | 18.55    | 20.9     | 2.35    | 0.887559809 | 0.6594   | 1.144  |
| 92985_at   | 18.8    | 21.1    | 14.7    | 15.8   | 14.5    | 19.3    | 28.2    | 38.9    | 0.253130399 | 17.6     | 25.225   | 7.625   | 0.697720515 | 0.2396   | 1.352  |
| 92986_g_at | 112.8   | 106.8   | 99.6    | 124.4  | 92.1    | 136     | 117.8   | 109.2   | 0.79626813  | 110.9    | 113.775  | 2.875   | 0.974730828 | 0.8458   | 1.019  |
| 92987_at   | 458.3   | 415.1   | 380.1   | 450.7  | 510.9   | 628.8   | 417.4   | 543.9   | 0.103912397 | 426.05   | 525.25   | 99.2    | 0.811137554 | 0.07891  | 1.223  |
| 92988_i_at | 77.6    | 39.9    | 59.7    | 61.1   | 81.6    | 139     | 85.2    | 78.2    | 0.081041324 | 59.575   | 96       | 36.425  | 0.620572917 | 0.04866  | 1.608  |
| 92989_f_at | 164.1   | 120.1   | 140.4   | 169    | 271.1   | 249.3   | 245.7   | 261.5   | 0.000616858 | 148.4    | 256.9    | 108.5   | 0.577656676 | 0.000493 | 1.746  |
| 92990_at   | 127.3   | 133.6   | 99.4    | 92.4   | 120.5   | 122.8   | 104.4   | 130.3   | 0.608800859 | 113.175  | 119.5    | 6.325   | 0.94707113  | 0.5575   | 1.065  |
| 92991_at   | 58.4    | 42.5    | 34.6    | 62.3   | 27.5    | 42.7    | 65.3    | 52.8    | 0.826138828 | 49.45    | 47.075   | 2.375   | 1.050451407 | 0.768    | -1.074 |
| 92992_i_at | 33.7    | 11.5    | 22      | 42.6   | 23.4    | 32.5    | 40.9    | 45.3    | 0.373749988 | 27.45    | 35.525   | 8.075   | 0.772695285 | 0.3341   | 1.405  |
| 92993_r_at | 45.3    | 43.8    | 35      | 68.4   | 49.1    | 48.2    | 47.9    | 54      | 0.831590158 | 48.125   | 49.8     | 1.675   | 0.966365462 | 0.6703   | 1.066  |
| 92994_at   | 12.5    | 15.1    | 4.6     | 7.8    | 7.8     | 14.4    | 7       | 4.3     | 0.62780147  | 10       | 8.375    | 1.625   | 1.194029851 | 0.6408   | -1.194 |
| 92995_at   | 51.6    | 48.5    | 23.4    | 49.5   | 22.9    | 43.1    | 44      | 52.1    | 0.774740617 | 43.25    | 40.525   | 2.725   | 1.067242443 | 0.8185   | -1.065 |
| 92996_at   | 132     | 174.8   | 155.4   | 246.9  | 159.7   | 196.1   | 181.8   | 238.6   | 0.597451685 | 177.275  | 194.05   | 16.775  | 0.913553208 | 0.5209   | 1.113  |
| 92997_g_at | 22.5    | 23.3    | 22.6    | 22.2   | 11.2    | 24.8    | 23.5    | 19.1    | 0.400893159 | 22.65    | 19.65    | 3       | 1.152671756 | 0.3431   | -1.206 |
| 92998_at   | 68.6    | 40.4    | 110.2   | 157.6  | 62.7    | 84.6    | 111.7   | 109.3   | 0.943054741 | 94.2     | 92.075   | 2.125   | 1.023079012 | 0.8266   | 1.077  |
| 92999_at   | 14.4    | 57      | 52.2    | 68     | 64.8    | 85.3    | 64.4    | 77.8    | 0.116940092 | 47.9     | 73.075   | 25.175  | 0.655490934 | 0.1713   | 1.757  |
| 93000_g_at | 76.3    | 19.1    | 68.9    | 71.7   | 61.7    | 121.7   | 78      | 95      | 0.155587187 | 59       | 89.1     | 30.1    | 0.662177329 | 0.2086   | 1.668  |
| 93001_at   | 19.6    | 4.2     | 21.2    | 23.3   | 20.5    | 30.7    | 41.2    | 35.8    | 0.052131901 | 17.075   | 32.05    | 14.975  | 0.53276131  | 0.1212   | 2.185  |
| 93002_r_at | 18.6    | 20      | 16.7    | 14.4   | 4.4     | 42.5    | 17      | 4.6     | 0.97553869  | 17.425   | 17.125   | 0.3     | 1.017518248 | 0.446    | -1.571 |
| 93004_r_at | 145.8   | 131.9   | 179.2   | 133.5  | 120.2   | 206.5   | 147.7   | 135.3   | 0.83422098  | 147.6    | 152.425  | 4.825   | 0.968345088 | 0.8957   | 1.019  |
| 93005_at   | 41.2    | 46.9    | 41.7    | 71.3   | 32.7    | 55.3    | 90      | 43.4    | 0.738395601 | 50.275   | 55.35    | 5.075   | 0.90831075  | 0.8452   | 1.052  |
| 93006_at   | 92.6    | 109.2   | 139.8   | 125.4  | 45.5    | 121.6   | 153.4   | 117     | 0.781759506 | 116.75   | 109.375  | 7.375   | 1.067428571 | 0.6273   | -1.156 |
| 93007_at   | 5.9     | 4.7     | 3.9     | 5.2    | 4.3     | 4.9     | 4.5     | 10.9    | 0.503896454 | 4.925    | 6.15     | 1.225   | 0.800813008 | 0.5469   | 1.164  |
| 93008_at   | 2168.2  | 2227.8  | 1848.1  | 2002.8 | 1837.8  | 1694.4  | 1641.1  | 1942.3  | 0.043657969 | 2061.725 | 1778.9   | 282.825 | 1.158988701 | 0.04159  | -1.159 |
| 93009_at   | 16955.3 | 18863.3 | 13134.2 | 14577  | 15933.2 | 15210.9 | 17444.3 | 15914.2 | 0.866450068 | 15882.45 | 16125.65 | 243.2   | 0.984918437 | 0.7913   | 1.024  |
| 93010_at   | 684.2   | 848     | 600.9   | 567.4  | 713.7   | 614.5   | 564.5   | 568     | 0.443229653 | 675.125  | 615.175  | 59.95   | 1.097451945 | 0.4455   | -1.089 |
| 93011_at   | 1153.2  | 1165.1  | 1106.6  | 1102.1 | 1095    | 1422.8  | 1111.3  | 1104.9  | 0.567140266 | 1131.75  | 1183.5   | 51.75   | 0.956273764 | 0.5738   | 1.039  |
| 93012_at   | 147.7   | 107.8   | 114.2   | 145    | 111.8   | 144.8   | 112.9   | 106.9   | 0.504385256 | 128.675  | 119.1    | 9.575   | 1.080394626 | 0.5075   | -1.078 |
| 93013_at   | 2026.2  | 2894.8  | 2098.3  | 2580.7 | 3129.6  | 2560.5  | 3061.1  | 2933.6  | 0.08371539  | 2400     | 2921.2   | 521.2   | 0.821580173 | 0.07757  | 1.227  |
| 93014_at   | 7175.1  | 7920.2  | 5807.6  | 5758.5 | 7045.8  | 6694.4  | 6775.9  | 6766.6  | 0.790628754 | 6665.35  | 6820.675 | 155.325 | 0.977227327 | 0.7002   | 1.033  |
| 93015_at   | 202.9   | 214.4   | 195.7   | 239.7  | 203.1   | 145     | 208.1   | 150.8   | 0.120390306 | 213.175  | 176.75   | 36.425  | 1.206082037 | 0.1092   | -1.219 |
| 93016_at   | 45.8    | 27.2    | 38.6    | 63.5   | 38.6    | 45      | 58.1    | 63.5    | 0.462142829 | 43.775   | 51.3     | 7.525   | 0.85331384  | 0.4117   | 1.204  |
| 93017_at   | 414.3   | 446.7   | 567     | 510.1  | 566.1   | 475.1   | 578.1   | 525.7   | 0.261135214 | 484.525  | 536.25   | 51.725  | 0.903543124 | 0.2474   | 1.112  |
| 93018_at   | 109     | 37.7    | 32.3    | 87.8   | 70.7    | 124.3   | 99.7    | 49.8    | 0.466054505 | 66.7     | 86.125   | 19.425  | 0.774455733 | 0.3985   | 1.39   |



|            |         |         |         |         |         |         |         |         |             |           |           |          |             |          |        |
|------------|---------|---------|---------|---------|---------|---------|---------|---------|-------------|-----------|-----------|----------|-------------|----------|--------|
| 93019_at   | 2329    | 2495.6  | 2505.9  | 2750.3  | 2250.7  | 1944.3  | 1893.7  | 1961.5  | 0.005238991 | 2520.2    | 2012.55   | 507.65   | 1.25224218  | 0.004744 | -1.253 |
| 93020_at   | 309.6   | 343.3   | 281.6   | 261.2   | 248.1   | 231.2   | 208.5   | 259.1   | 0.031135791 | 298.925   | 236.725   | 62.2     | 1.262752139 | 0.02251  | -1.26  |
| 93021_at   | 3656.1  | 3367.6  | 2923.6  | 2838.8  | 2434.7  | 1974.7  | 1516.4  | 2182.6  | 0.005220392 | 3196.525  | 2027.1    | 1169.425 | 1.576895565 | 0.007485 | -1.592 |
| 93022_i_at | 97.2    | 80.8    | 75.6    | 76      | 52.9    | 111.1   | 63.9    | 63.5    | 0.53236452  | 82.4      | 72.85     | 9.55     | 1.131091283 | 0.3869   | -1.173 |
| 93023_f_at | 640.9   | 643.8   | 326.1   | 417.7   | 349.7   | 344     | 447.3   | 347.2   | 0.191808832 | 507.125   | 372.05    | 135.075  | 1.363056041 | 0.1756   | -1.317 |
| 93024_at   | 18.3    | 21.9    | 11.2    | 21.2    | 12.8    | 25      | 28.2    | 20.1    | 0.449706928 | 18.15     | 21.525    | 3.375    | 0.843205575 | 0.5147   | 1.174  |
| 93025_at   | 4216.2  | 4894.1  | 4420    | 5399.4  | 4941.7  | 4559.3  | 5203.4  | 5323.8  | 0.420164418 | 4732.425  | 5007.05   | 274.625  | 0.945152335 | 0.3969   | 1.061  |
| 93026_at   | 1646.7  | 1933.8  | 1620.2  | 2260    | 2472    | 1912.4  | 2152.5  | 2315.5  | 0.12147646  | 1865.175  | 2213.1    | 347.925  | 0.842788396 | 0.1152   | 1.192  |
| 93027_r_at | 43.5    | 68      | 45.6    | 97      | 36.1    | 45      | 64.7    | 58.1    | 0.416117753 | 63.525    | 50.975    | 12.55    | 1.246199117 | 0.438    | -1.21  |
| 93028_at   | 10004.1 | 11032.7 | 9602.8  | 9988.1  | 9616.6  | 11706.2 | 11299.1 | 12207   | 0.166152299 | 10156.925 | 11207.225 | 1050.3   | 0.90628367  | 0.1613   | 1.1    |
| 93029_at   | 2140.7  | 2571.2  | 2185    | 2277.6  | 3050.5  | 2586.2  | 2869.6  | 2608.9  | 0.017006603 | 2293.625  | 2778.8    | 485.175  | 0.825401252 | 0.01508  | 1.212  |
| 93030_at   | 13258.2 | 16825.7 | 10694.3 | 12689.7 | 12033.7 | 11413.7 | 12960.6 | 12595.2 | 0.453264902 | 13366.975 | 12250.8   | 1116.175 | 1.091110376 | 0.4703   | -1.078 |
| 93033_at   | 128.2   | 102.8   | 96.5    | 143.4   | 112.4   | 164.6   | 130.9   | 149     | 0.220810518 | 117.725   | 139.225   | 21.5     | 0.845573712 | 0.219    | 1.186  |
| 93037_i_at | 148.2   | 181.6   | 170.2   | 170.8   | 206.9   | 141.5   | 239.7   | 169.6   | 0.395338154 | 167.7     | 189.425   | 21.725   | 0.885310809 | 0.4262   | 1.111  |
| 93038_f_at | 975.7   | 1613.5  | 1041.7  | 1042.3  | 1429.7  | 1098.7  | 1111.9  | 925.9   | 0.888767121 | 1168.3    | 1141.55   | 26.75    | 1.023433052 | 0.9277   | 1.014  |
| 93039_at   | 547.8   | 796.6   | 594.5   | 506.4   | 816.7   | 761.7   | 700.6   | 600.4   | 0.224737516 | 611.325   | 719.85    | 108.525  | 0.849239425 | 0.1979   | 1.188  |
| 93040_at   | 1799.3  | 1895.3  | 1241.4  | 1187.8  | 1675.6  | 1986.6  | 1565.9  | 1548.5  | 0.474849116 | 1530.95   | 1694.15   | 163.2    | 0.903668506 | 0.4136   | 1.126  |
| 93041_at   | 1667    | 1443.8  | 1958.4  | 1661.2  | 1570.1  | 1592.8  | 1892.5  | 1725.9  | 0.925011865 | 1682.6    | 1695.325  | 12.725   | 0.992494065 | 0.8936   | 1.011  |
| 93042_at   | 2327.5  | 1993.3  | 1872.8  | 1742.4  | 1629.9  | 2187.7  | 1943.5  | 1802.8  | 0.608435582 | 1984      | 1890.975  | 93.025   | 1.049194199 | 0.6025   | -1.049 |
| 93043_at   | 1420.7  | 1737.8  | 1872.9  | 1982.7  | 1880.3  | 1780.3  | 2072.3  | 2105.4  | 0.211865966 | 1753.525  | 1959.575  | 206.05   | 0.894849649 | 0.2105   | 1.123  |
| 93045_at   | 2198.1  | 2104.8  | 2577.4  | 2473.6  | 1879.6  | 1807.4  | 2196.1  | 2256.3  | 0.103468077 | 2338.475  | 2034.85   | 303.625  | 1.149212473 | 0.1038   | -1.151 |
| 93046_at   | 285.9   | 295     | 364.7   | 490     | 332.3   | 164.2   | 352.7   | 515.6   | 0.844645741 | 358.9     | 341.2     | 17.7     | 1.051875733 | 0.7109   | -1.11  |
| 93047_at   | 389.7   | 286.2   | 349     | 409.3   | 250     | 382.3   | 347.9   | 301.2   | 0.371685533 | 358.55    | 320.35    | 38.2     | 1.119244576 | 0.378    | -1.123 |
| 93048_at   | 1544.5  | 1851.6  | 1145.7  | 949.9   | 1653.9  | 1490.9  | 1077.6  | 1215.6  | 0.957567311 | 1372.925  | 1359.5    | 13.425   | 1.009874954 | 0.9601   | 1.009  |
| 93050_at   | 12.1    | 11.4    | 10.5    | 9.3     | 9       | 15.7    | 7.8     | 7.1     | 0.67985151  | 10.825    | 9.9       | 0.925    | 1.093434343 | 0.4967   | -1.144 |
| 93051_at   | 109.9   | 93.7    | 83      | 85.9    | 140.7   | 129.6   | 99.4    | 123.9   | 0.033132624 | 93.125    | 123.4     | 30.275   | 0.754659643 | 0.02817  | 1.323  |
| 93053_at   | 273     | 296.9   | 216.2   | 275.6   | 250.1   | 238.6   | 221.5   | 227.7   | 0.171394768 | 265.425   | 234.475   | 30.95    | 1.131997015 | 0.1593   | -1.126 |
| 93054_at   | 1440.7  | 1064.1  | 1447.2  | 944.8   | 1620.3  | 1635.1  | 1066.4  | 1121.5  | 0.523613314 | 1224.2    | 1360.825  | 136.625  | 0.899601345 | 0.5374   | 1.109  |
| 93055_at   | 806     | 891.5   | 1087.1  | 917.9   | 761.8   | 833.9   | 1155.8  | 1078.3  | 0.786659623 | 925.625   | 957.45    | 31.825   | 0.966760666 | 0.8403   | 1.025  |
| 93056_g_at | 661.8   | 586.9   | 611.2   | 595.2   | 547     | 537.4   | 778.5   | 700.2   | 0.686414843 | 613.775   | 640.775   | 27       | 0.957863525 | 0.7539   | 1.032  |
| 93057_at   | 4753.1  | 6099.2  | 4810.9  | 3924.4  | 5549.7  | 4833.3  | 3863.2  | 4208.7  | 0.644677884 | 4896.9    | 4613.725  | 283.175  | 1.061376653 | 0.6535   | -1.058 |
| 93058_at   | 881.4   | 1042.9  | 1188.8  | 1098.2  | 1088.4  | 994.1   | 1224.8  | 1039    | 0.694518488 | 1052.825  | 1086.575  | 33.75    | 0.968939098 | 0.6735   | 1.035  |
| 93059_at   | 1331.8  | 1429.6  | 1300.6  | 1294.4  | 1501.1  | 1421    | 1412    | 1273    | 0.317912577 | 1339.1    | 1401.775  | 62.675   | 0.95528883  | 0.3203   | 1.046  |
| 93061_at   | 151.4   | 58.1    | 104.9   | 147.4   | 126.3   | 159.5   | 90.6    | 134.1   | 0.659320963 | 115.45    | 127.625   | 12.175   | 0.90460333  | 0.5829   | 1.158  |
| 93062_at   | 787.7   | 872.5   | 882.4   | 754     | 976.6   | 709     | 789.9   | 796.5   | 0.928206462 | 824.15    | 818       | 6.15     | 1.007518337 | 0.8808   | 1.012  |
| 93063_at   | 5634.5  | 4693.2  | 5349    | 6818.6  | 3775.3  | 3522.1  | 5589.4  | 6145.1  | 0.320103222 | 5623.825  | 4757.975  | 865.85   | 1.181978678 | 0.2849   | -1.205 |
| 93064_at   | 1063.5  | 907.6   | 990.9   | 1121.8  | 916.6   | 900.8   | 1107.5  | 1274.7  | 0.784613776 | 1020.95   | 1049.9    | 28.95    | 0.972425945 | 0.8337   | 1.021  |
| 93065_at   | 95.2    | 106.5   | 93      | 66.8    | 82.1    | 51.7    | 62.2    | 74.6    | 0.081203303 | 90.375    | 67.65     | 22.725   | 1.335920177 | 0.08828  | -1.338 |
| 93066_at   | 574.4   | 635.9   | 835.4   | 1085.3  | 661.3   | 621.3   | 840.8   | 1018.1  | 0.986349153 | 782.75    | 785.375   | 2.625    | 0.996657648 | 0.9372   | 1.015  |
| 93067_f_at | 1047.8  | 827.1   | 624.4   | 764     | 788.4   | 716.6   | 652.9   | 865.4   | 0.575000975 | 815.825   | 755.825   | 60       | 1.079383455 | 0.6179   | -1.067 |
| 93068_r_at | 252.2   | 384     | 187.2   | 241     | 195.2   | 187.2   | 209.5   | 250     | 0.281122225 | 266.1     | 210.475   | 55.625   | 1.264283169 | 0.2496   | -1.229 |
| 93069_at   | 849.5   | 813.6   | 947.5   | 1193.7  | 826.8   | 639.7   | 1145.4  | 1115    | 0.900853149 | 951.075   | 931.725   | 19.35    | 1.02076793  | 0.8293   | -1.037 |
| 93070_at   | 1239    | 1386.7  | 1459.6  | 1314.4  | 1559.7  | 1321.9  | 1510.9  | 1367    | 0.270754905 | 1349.925  | 1439.875  | 89.95    | 0.937529299 | 0.2715   | 1.066  |
| 93071_at   | 6757.1  | 5088    | 6991.4  | 7413.3  | 5187.9  | 4976.2  | 6041.7  | 6217.3  | 0.169900233 | 6562.45   | 5605.775  | 956.675  | 1.17065883  | 0.1799   | -1.164 |
| 93072_at   | 19.9    | 9.7     | 10.1    | 9.1     | 8.8     | 34.7    | 11.1    | 7.4     | 0.65965163  | 12.2      | 15.5      | 3.3      | 0.787096774 | 0.8371   | 1.088  |
| 93073_at   | 262     | 224.7   | 154.4   | 195.7   | 191     | 244.7   | 221.4   | 179.8   | 0.999298891 | 209.2     | 209.225   | 0.025    | 0.999880511 | 0.9356   | 1.011  |
| 93074_g_at | 26.3    | 21.9    | 19.6    | 22.5    | 14.8    | 36.4    | 19      | 16.6    | 0.874903947 | 22.575    | 21.7      | 0.875    | 1.040322581 | 0.6446   | -1.108 |
| 93075_r_at | 3.5     | 17.2    | 11      | 15.8    | 2.9     | 22.8    | 2.5     | 8.8     | 0.661683725 | 11.875    | 9.25      | 2.625    | 1.283783784 | 0.4608   | -1.65  |
| 93076_at   | 1919.6  | 2173.6  | 2227.9  | 2575.9  | 2479.4  | 2073.6  | 2341.7  | 2214.5  | 0.754242047 | 2224.25   | 2277.3    | 53.05    | 0.97670487  | 0.7201   | 1.027  |
| 93077_s_at | 2069.8  | 2111.1  | 1702    | 1755.4  | 1870.2  | 2054.8  | 1952.7  | 1710.3  | 0.925347803 | 1909.575  | 1897      | 12.575   | 1.006628888 | 0.9518   | 1.004  |
| 93078_at   | 212.2   | 222.2   | 154.9   | 198.5   | 185.2   | 243.3   | 153.4   | 177.7   | 0.780697007 | 196.95    | 189.9     | 7.05     | 1.037124803 | 0.7522   | -1.042 |
| 93080_at   | 939     | 937.1   | 798.3   | 693     | 848.8   | 1037.2  | 827.4   | 803.7   | 0.656686266 | 841.85    | 879.275   | 37.425   | 0.957436524 | 0.6382   | 1.047  |
| 93081_at   | 7627.9  | 8763.9  | 7613    | 8061    | 8458.7  | 7967.2  | 9180.7  | 8276.2  | 0.269158426 | 8016.45   | 8470.7    | 454.25   | 0.946373971 | 0.2603   | 1.057  |
| 93082_at   | 2405.7  | 2583.5  | 2621.7  | 3091.2  | 3072.7  | 2754.9  | 3277.3  | 3017.5  | 0.102633646 | 2675.525  | 3030.6    | 355.075  | 0.882836732 | 0.09449  | 1.135  |
| 93083_at   | 5293.8  | 5005.3  | 4486.5  | 3831.6  | 4791.8  | 4891    | 5623    | 4539.2  | 0.470998788 | 4654.3    | 4961.25   | 306.95   | 0.938130511 | 0.451    | 1.07   |
| 93084_at   | 5588.6  | 5383.8  | 4910.3  | 5622.4  | 6428.1  | 6169.1  | 6371.4  | 6237.1  | 0.007124688 | 5376.275  | 6301.425  | 925.15   | 0.853184002 | 0.002699 | 1.174  |



|            |        |        |        |        |        |        |        |        |             |          |          |         |             |          |        |
|------------|--------|--------|--------|--------|--------|--------|--------|--------|-------------|----------|----------|---------|-------------|----------|--------|
| 93085_at   | 189.6  | 116.5  | 54.8   | 55     | 160.7  | 181.4  | 160.7  | 108.9  | 0.235608955 | 103.975  | 152.925  | 48.95   | 0.679908452 | 0.1669   | 1.664  |
| 93086_at   | 246.1  | 125.4  | 275.5  | 176.6  | 238.7  | 436.1  | 197.1  | 190.2  | 0.41592592  | 205.9    | 265.525  | 59.625  | 0.775444873 | 0.3965   | 1.27   |
| 93087_r_at | 349.5  | 180.3  | 221.8  | 277.4  | 192.7  | 230.2  | 262.3  | 224.3  | 0.490617171 | 257.25   | 227.375  | 29.875  | 1.131390874 | 0.5492   | -1.104 |
| 93088_at   | 2592.8 | 4630.8 | 3787.1 | 3495.5 | 5449.7 | 4003.9 | 4477.9 | 4068.4 | 0.15724214  | 3626.55  | 4499.975 | 873.425 | 0.805904477 | 0.1519   | 1.258  |
| 93089_at   | 4182   | 5319.1 | 5085.9 | 5433.2 | 5645.7 | 4266.6 | 5839.2 | 4185.3 | 0.969730202 | 5005.05  | 4984.2   | 20.85   | 1.004183219 | 0.9228   | 1.011  |
| 93090_at   | 503.5  | 463.4  | 537.7  | 627.9  | 526.7  | 639.4  | 717    | 839.6  | 0.110068247 | 533.125  | 680.675  | 147.55  | 0.783229882 | 0.09079  | 1.266  |
| 93091_s_at | 169.2  | 75.4   | 285.6  | 318.6  | 185.9  | 119.8  | 319.8  | 262.8  | 0.893971175 | 212.2    | 222.075  | 9.875   | 0.955533041 | 0.7713   | 1.127  |
| 93092_at   | 136.4  | 177.4  | 283.9  | 249.6  | 403.4  | 376.3  | 367    | 419.4  | 0.008520739 | 211.825  | 391.525  | 179.7   | 0.541025477 | 0.008324 | 1.921  |
| 93093_at   | 860.2  | 979    | 1178.8 | 1271.4 | 1079.5 | 922.9  | 1186   | 1063.1 | 0.93356525  | 1072.35  | 1062.875 | 9.475   | 1.008914501 | 0.9907   | 1.001  |
| 93094_at   | 222.2  | 219.7  | 316.7  | 254.7  | 337.5  | 270.7  | 277.7  | 331.1  | 0.127753611 | 253.325  | 304.25   | 50.925  | 0.8326212   | 0.1149   | 1.209  |
| 93095_at   | 1901.9 | 2022.7 | 1884   | 1761.4 | 2149.9 | 2180.2 | 2212   | 2068.7 | 0.009162184 | 1892.5   | 2152.7   | 260.2   | 0.879128536 | 0.006448 | 1.139  |
| 93096_at   | 5.1    | 21.7   | 21.8   | 11.9   | 26.9   | 3.8    | 19.4   | 21.5   | 0.680956503 | 15.125   | 17.9     | 2.775   | 0.844972067 | 0.8648   | 1.105  |
| 93097_at   | 33     | 47.8   | 33.2   | 81.9   | 38.3   | 117.7  | 52.7   | 46.4   | 0.522323371 | 48.975   | 63.775   | 14.8    | 0.767934143 | 0.4974   | 1.266  |
| 93098_at   | 52.1   | 25.1   | 19.9   | 27.9   | 16.7   | 12.2   | 35.1   | 10.1   | 0.215438956 | 31.25    | 18.525   | 12.725  | 1.686909582 | 0.1434   | -1.779 |
| 93099_f_at | 472    | 355.3  | 863    | 509.5  | 284.9  | 350    | 429.9  | 415.2  | 0.19949376  | 549.95   | 370      | 179.95  | 1.486351351 | 0.1381   | -1.427 |
| 93100_at   | 4349.9 | 6668   | 5629.4 | 5651.5 | 4383.5 | 4393.3 | 5881.3 | 5555.8 | 0.429812603 | 5574.7   | 5053.475 | 521.225 | 1.103141897 | 0.4453   | -1.1   |
| 93101_s_at | 4297.3 | 4602.7 | 4341.8 | 4762.4 | 4716.2 | 4507.1 | 5767.4 | 5456.3 | 0.131242289 | 4501.05  | 5111.75  | 610.7   | 0.880530151 | 0.1003   | 1.131  |
| 93102_f_at | 922.1  | 767.9  | 931.5  | 761.2  | 462.8  | 967.1  | 730.8  | 654.4  | 0.280017856 | 845.675  | 703.775  | 141.9   | 1.20162694  | 0.237    | -1.238 |
| 93103_at   | 6.4    | 50.8   | 15.8   | 39.4   | 70.1   | 13.4   | 18.6   | 43.5   | 0.635327535 | 28.1     | 36.4     | 8.3     | 0.771978022 | 0.6041   | 1.394  |
| 93104_at   | 771.3  | 890.3  | 944.1  | 1026.6 | 948.7  | 817.8  | 1018.6 | 1049.5 | 0.521218081 | 908.075  | 958.65   | 50.575  | 0.94724352  | 0.5273   | 1.057  |
| 93105_s_at | 210.9  | 182.4  | 189.5  | 166.2  | 204.1  | 237.1  | 182.1  | 236.2  | 0.146131167 | 187.25   | 214.875  | 27.625  | 0.871436882 | 0.1435   | 1.145  |
| 93106_i_at | 2.2    | 11.6   | 6.6    | 1.3    | 10.7   | 8.2    | 8      | 19.2   | 0.13579063  | 5.425    | 11.525   | 6.1     | 0.470715835 | 0.1053   | 2.808  |
| 93107_r_at | 2.1    | 12.1   | 0.5    | 3      | 1.7    | 2.7    | 2.2    | 0.2    | 0.376447646 | 4.425    | 1.7      | 2.725   | 2.602941176 | 0.4795   | -1.924 |
| 93108_at   | 113.8  | 77.4   | 78     | 105.6  | 72.4   | 157.4  | 102.7  | 105.5  | 0.468084808 | 93.7     | 109.5    | 15.8    | 0.855707763 | 0.5058   | 1.142  |
| 93109_f_at | 85.9   | 53.1   | 54.8   | 43.7   | 53.4   | 97.6   | 51.3   | 70.8   | 0.551675918 | 59.375   | 68.275   | 8.9     | 0.869644819 | 0.5303   | 1.147  |
| 93111_at   | 1553.8 | 1471.4 | 1571.7 | 1592.2 | 1470.3 | 1393.8 | 1702.6 | 1658.5 | 0.914418741 | 1547.275 | 1556.3   | 9.025   | 0.99420099  | 0.9572   | 1.003  |
| 93112_at   | 1324.2 | 1162.2 | 1313.3 | 1329.3 | 866    | 881.6  | 1100.9 | 1024.8 | 0.005259164 | 1282.25  | 968.325  | 313.925 | 1.32419384  | 0.00531  | -1.329 |
| 93114_at   | 70.6   | 53.5   | 44.4   | 31.9   | 39.9   | 61     | 54.1   | 17.8   | 0.602515278 | 50.1     | 43.2     | 6.9     | 1.159722222 | 0.5493   | -1.228 |
| 93116_at   | 1275.6 | 1263.1 | 1316.6 | 1504.5 | 1260.9 | 1462.6 | 1469.5 | 1495.5 | 0.332466316 | 1339.95  | 1422.125 | 82.175  | 0.942216753 | 0.3322   | 1.062  |
| 93117_at   | 6216.5 | 6467.2 | 5835.9 | 7627.8 | 6351.5 | 6514.2 | 8014.5 | 7282.1 | 0.389972816 | 6536.85  | 7040.575 | 503.725 | 0.928453997 | 0.3764   | 1.078  |
| 93118_at   | 633.4  | 660.2  | 746.5  | 821.1  | 954.3  | 843.6  | 805    | 957.6  | 0.023412215 | 715.3    | 890.125  | 174.825 | 0.803595001 | 0.02398  | 1.247  |
| 93119_at   | 5052   | 5884.5 | 3776.8 | 3514   | 5079.5 | 4242.8 | 3615.7 | 3906.1 | 0.612970231 | 4556.825 | 4211.025 | 345.8   | 1.082117774 | 0.6629   | -1.067 |
| 93120_f_at | 811.3  | 903.9  | 859.8  | 841.1  | 1072.8 | 1353   | 1073.7 | 970.4  | 0.04549558  | 854.025  | 1117.475 | 263.45  | 0.764245285 | 0.01218  | 1.299  |
| 93121_at   | 52.9   | 41.3   | 30.9   | 62.1   | 38.1   | 60.4   | 56.3   | 39.3   | 0.85281638  | 46.8     | 48.525   | 1.725   | 0.964451314 | 0.8092   | 1.05   |
| 93122_at   | 17.1   | 19.5   | 2.7    | 3.1    | 2.6    | 47.9   | 19.8   | 19.3   | 0.316011939 | 10.6     | 22.4     | 11.8    | 0.473214286 | 0.4212   | 2.024  |
| 93124_at   | 41.6   | 21.6   | 14.6   | 5.1    | 25.9   | 65     | 5.4    | 10.1   | 0.722387088 | 20.725   | 26.6     | 5.875   | 0.779135338 | 0.9166   | 1.079  |
| 93126_at   | 1050.9 | 1195   | 1044.8 | 948.3  | 915.6  | 1074.8 | 735.8  | 894.1  | 0.126569328 | 1059.75  | 905.075  | 154.675 | 1.170897439 | 0.1227   | -1.177 |
| 93127_at   | 95.7   | 49.1   | 58     | 58.6   | 58.3   | 166.6  | 68.7   | 59.1   | 0.464862822 | 65.35    | 88.175   | 22.825  | 0.741139779 | 0.465    | 1.253  |
| 93128_at   | 85.3   | 35.9   | 40.4   | 51.8   | 37.5   | 74.1   | 45.4   | 31.2   | 0.682387301 | 53.35    | 47.05    | 6.3     | 1.133900106 | 0.6649   | -1.129 |
| 93129_at   | 12.9   | 12     | 10.7   | 14.6   | 10.1   | 14.4   | 10.2   | 11.9   | 0.514648347 | 12.55    | 11.65    | 0.9     | 1.077253219 | 0.4743   | -1.084 |
| 93130_at   | 280.3  | 277.9  | 380.4  | 386.4  | 302.6  | 311.7  | 342.5  | 317.3  | 0.708305924 | 331.25   | 318.525  | 12.725  | 1.039949768 | 0.7809   | -1.028 |
| 93131_at   | 9.9    | 35.3   | 43.6   | 50.5   | 43.9   | 27.7   | 26.1   | 28.8   | 0.759133564 | 34.825   | 31.625   | 3.2     | 1.101185771 | 0.915    | 1.045  |
| 93132_at   | 6.8    | 11.1   | 11.3   | 5.1    | 7.8    | 15.3   | 11.5   | 15.6   | 0.15117426  | 8.575    | 12.55    | 3.975   | 0.683266932 | 0.1709   | 1.482  |
| 93133_at   | 21.8   | 36.2   | 24.8   | 40.8   | 46.4   | 40.2   | 31.4   | 56.5   | 0.118268769 | 30.9     | 43.625   | 12.725  | 0.708309456 | 0.1155   | 1.428  |
| 93134_at   | 38.9   | 48.2   | 14.7   | 51.1   | 30.9   | 74.3   | 14.4   | 70.4   | 0.60840242  | 38.225   | 47.5     | 9.275   | 0.804736842 | 0.8065   | 1.132  |
| 93136_at   | 19.8   | 4.2    | 2      | 3      | 2.2    | 9.4    | 6      | 15.5   | 0.847276764 | 7.25     | 8.275    | 1.025   | 0.876132931 | 0.6222   | 1.405  |
| 93137_at   | 28.5   | 45.1   | 23.2   | 60.4   | 71.6   | 33.6   | 29.7   | 71.1   | 0.427747755 | 39.3     | 51.5     | 12.2    | 0.763106796 | 0.4499   | 1.296  |
| 93138_at   | 733.5  | 695.5  | 586.9  | 607.8  | 567.6  | 614.6  | 437    | 517.4  | 0.056639869 | 655.925  | 534.15   | 121.775 | 1.227979032 | 0.06047  | -1.232 |
| 93139_at   | 440.5  | 301    | 317.4  | 318.6  | 279.8  | 310.2  | 314.3  | 294.3  | 0.262164961 | 344.375  | 299.65   | 44.725  | 1.149257467 | 0.2085   | -1.137 |
| 93140_at   | 21.4   | 27.7   | 23.6   | 15.3   | 51.2   | 23.1   | 8.8    | 31     | 0.523078349 | 22       | 28.525   | 6.525   | 0.771253287 | 0.802    | 1.108  |
| 93141_at   | 987    | 671.5  | 801.9  | 942.6  | 464.7  | 371.6  | 578.7  | 517.4  | 0.007252149 | 850.75   | 483.1    | 367.65  | 1.761022563 | 0.004501 | -1.764 |
| 93142_at   | 44.8   | 76.5   | 16.2   | 105.4  | 17.4   | 54     | 43.3   | 28.7   | 0.300256117 | 60.725   | 35.85    | 24.875  | 1.693863319 | 0.434    | -1.495 |
| 93143_at   | 138.2  | 180.4  | 128.1  | 168.2  | 148.5  | 135.1  | 102.9  | 129.2  | 0.1658121   | 153.725  | 128.925  | 24.8    | 1.192359899 | 0.1694   | -1.191 |
| 93144_at   | 734.6  | 519.8  | 753.5  | 759.3  | 694.9  | 531.4  | 806.4  | 908.5  | 0.677879246 | 691.8    | 735.3    | 43.5    | 0.940840473 | 0.7296   | 1.055  |
| 93145_at   | 151.7  | 176.1  | 207.5  | 163.8  | 153.2  | 158.6  | 197.9  | 247.9  | 0.585265391 | 174.775  | 189.4    | 14.625  | 0.922782471 | 0.6195   | 1.07   |
| 93146_at   | 62.8   | 45.5   | 13.8   | 14.2   | 26     | 79.9   | 47.1   | 25.8   | 0.56802365  | 34.075   | 44.7     | 10.625  | 0.762304251 | 0.4592   | 1.458  |



|            |        |        |        |        |        |        |        |        |             |          |          |         |             |          |        |
|------------|--------|--------|--------|--------|--------|--------|--------|--------|-------------|----------|----------|---------|-------------|----------|--------|
| 93147_f_at | 70.1   | 73.2   | 74.3   | 73.3   | 77.4   | 93.1   | 71.7   | 93.3   | 0.134958771 | 72.725   | 83.875   | 11.15   | 0.867064083 | 0.0906   | 1.146  |
| 93148_at   | 223.6  | 190.3  | 205    | 233.4  | 169.2  | 141.5  | 238.3  | 198.9  | 0.313935915 | 213.075  | 186.975  | 26.1    | 1.139590854 | 0.2706   | -1.157 |
| 93151_at   | 26.8   | 48.8   | 61.2   | 96.6   | 38.8   | 63.2   | 104.3  | 47.4   | 0.813606843 | 58.35    | 63.425   | 5.075   | 0.919984233 | 0.7547   | 1.118  |
| 93153_at   | 171.1  | 130.2  | 118.2  | 140.6  | 97.6   | 169.1  | 112.7  | 151.7  | 0.732512295 | 140.025  | 132.775  | 7.25    | 1.054603653 | 0.6655   | -1.07  |
| 93155_at   | 124.1  | 115.1  | 127.7  | 149.6  | 147.8  | 171.6  | 154.3  | 130.1  | 0.102228366 | 129.125  | 150.95   | 21.825  | 0.855415701 | 0.09786  | 1.169  |
| 93158_at   | 272.1  | 150.5  | 186.3  | 185.3  | 160    | 266.6  | 263.8  | 179.3  | 0.637499411 | 198.55   | 217.425  | 18.875  | 0.913188456 | 0.6395   | 1.093  |
| 93159_at   | 126.1  | 85.7   | 85     | 139.5  | 94.8   | 133.7  | 88.2   | 96.3   | 0.749552676 | 109.075  | 103.25   | 5.825   | 1.056416465 | 0.7929   | -1.045 |
| 93162_f_at | 10.5   | 9.9    | 7.6    | 5.6    | 24.1   | 3.3    | 2.9    | 2.4    | 0.969345987 | 8.4      | 8.175    | 0.225   | 1.027522936 | 0.3839   | -1.691 |
| 93163_at   | 21.8   | 6.8    | 8.9    | 2.4    | 10.9   | 26.4   | 5.1    | 13.5   | 0.538530576 | 9.975    | 13.975   | 4       | 0.713774597 | 0.4508   | 1.581  |
| 93164_at   | 584.9  | 463.7  | 572.4  | 570.6  | 255.9  | 490    | 658.5  | 542    | 0.532881895 | 547.9    | 486.6    | 61.3    | 1.125976161 | 0.4512   | -1.186 |
| 93165_at   | 100.8  | 83.3   | 77.7   | 75.5   | 56.1   | 78.3   | 63.9   | 66.7   | 0.051046521 | 84.325   | 66.25    | 18.075  | 1.272830189 | 0.04322  | -1.273 |
| 93166_at   | 10.7   | 11.6   | 13.9   | 4.4    | 2.9    | 4.2    | 9.7    | 3.6    | 0.099157436 | 10.15    | 5.1      | 5.05    | 1.990196078 | 0.09834  | -2.05  |
| 93167_f_at | 21.5   | 14.2   | 5      | 12.4   | 8.1    | 18.9   | 11.1   | 12.4   | 0.879434567 | 13.275   | 12.625   | 0.65    | 1.051485149 | 0.9439   | 1.026  |
| 93168_at   | 13.5   | 2.6    | 6.8    | 6.7    | 13     | 6.5    | 9.3    | 12.6   | 0.326008986 | 7.4      | 10.35    | 2.95    | 0.714975845 | 0.2681   | 1.586  |
| 93169_at   | 1256.1 | 1046.8 | 1240.5 | 917.5  | 1205.1 | 728.3  | 1098.2 | 1230.5 | 0.73904221  | 1115.225 | 1065.525 | 49.7    | 1.046643673 | 0.6993   | -1.06  |
| 93173_at   | 106.5  | 119.2  | 114.3  | 101.2  | 120.4  | 110.5  | 101.3  | 135.9  | 0.463350738 | 110.3    | 117.025  | 6.725   | 0.942533647 | 0.4719   | 1.057  |
| 93174_at   | 574    | 477.6  | 493.8  | 514.3  | 350.4  | 421.5  | 328.6  | 469.2  | 0.023761469 | 514.925  | 392.425  | 122.5   | 1.31216156  | 0.02227  | -1.322 |
| 93175_at   | 344.9  | 314.2  | 381.4  | 350.3  | 323.2  | 416.2  | 348.9  | 398    | 0.391650129 | 347.7    | 371.575  | 23.875  | 0.935746485 | 0.4016   | 1.066  |
| 93177_at   | 204.4  | 225.1  | 245.2  | 265.5  | 265    | 242    | 233.3  | 238.8  | 0.544535998 | 235.05   | 244.775  | 9.725   | 0.960269635 | 0.5093   | 1.045  |
| 93178_at   | 108.3  | 254.7  | 226.7  | 162.5  | 39     | 192.8  | 110.7  | 127.9  | 0.17326026  | 188.05   | 117.6    | 70.45   | 1.599064626 | 0.1988   | -1.757 |
| 93179_at   | 34.8   | 46.4   | 48.7   | 66     | 39.1   | 51.1   | 39.3   | 62.9   | 0.92217016  | 48.975   | 48.1     | 0.875   | 1.018191268 | 0.9427   | 1.013  |
| 93180_at   | 13.1   | 26.4   | 63.2   | 12.4   | 11.8   | 49.3   | 23.9   | 37.5   | 0.902739865 | 28.775   | 30.625   | 1.85    | 0.939591837 | 0.7524   | 1.177  |
| 93181_r_at | 19.7   | 18.6   | 25.8   | 34.9   | 42.9   | 27.1   | 44.6   | 30.9   | 0.089765088 | 24.75    | 36.375   | 11.625  | 0.680412371 | 0.08176  | 1.483  |
| 93182_at   | 19.1   | 23.6   | 30.5   | 49.6   | 32.5   | 45.4   | 17.8   | 53.3   | 0.547860563 | 30.7     | 37.25    | 6.55    | 0.824161074 | 0.5917   | 1.198  |
| 93183_at   | 756.1  | 731    | 826.5  | 575.6  | 676.9  | 699    | 633.6  | 578.9  | 0.266604182 | 722.3    | 647.1    | 75.2    | 1.116210787 | 0.2817   | -1.109 |
| 93184_at   | 271.5  | 278.3  | 325.8  | 355.2  | 327    | 299.1  | 374.7  | 392.2  | 0.215023628 | 307.7    | 348.25   | 40.55   | 0.88356066  | 0.2145   | 1.132  |
| 93185_at   | 164.1  | 170    | 109.7  | 130.3  | 156.5  | 152.3  | 108.9  | 141.7  | 0.844451278 | 143.525  | 139.85   | 3.675   | 1.026278155 | 0.8838   | -1.02  |
| 93186_at   | 12.2   | 13.1   | 13.1   | 19     | 17.3   | 27.1   | 10.6   | 22.5   | 0.262395139 | 14.35    | 19.375   | 5.025   | 0.740645161 | 0.2922   | 1.298  |
| 93187_at   | 2349.5 | 2274.3 | 2467.4 | 2417.2 | 1980.8 | 2013.8 | 1651.5 | 1778   | 0.004277218 | 2377.1   | 1856.025 | 521.075 | 1.280747835 | 0.002458 | -1.284 |
| 93188_at   | 254.1  | 238.8  | 239.6  | 210.6  | 143.5  | 231.9  | 271.6  | 223.9  | 0.561757193 | 235.775  | 217.725  | 18.05   | 1.082902744 | 0.495    | -1.109 |
| 93190_at   | 256    | 214.3  | 313.7  | 342.9  | 258.7  | 283    | 278    | 280.5  | 0.833804538 | 281.725  | 275.05   | 6.675   | 1.024268315 | 0.9399   | -1.008 |
| 93191_at   | 507.6  | 559.9  | 732.1  | 626.7  | 709.9  | 544.8  | 662.3  | 692.9  | 0.482546638 | 606.575  | 652.475  | 45.9    | 0.929652477 | 0.466    | 1.08   |
| 93193_at   | 87.8   | 61.2   | 65.2   | 81.1   | 88.1   | 133.5  | 65.9   | 111.7  | 0.176766814 | 73.825   | 99.8     | 25.975  | 0.739729459 | 0.1634   | 1.321  |
| 93194_at   | 21.3   | 22     | 10.7   | 10.7   | 115.1  | 34.3   | 15.3   | 17.5   | 0.301879403 | 16.175   | 45.55    | 29.375  | 0.355104281 | 0.1898   | 2.108  |
| 93195_at   | 107.9  | 125.2  | 118.4  | 134.1  | 119.5  | 129.9  | 134.8  | 132.2  | 0.287813116 | 121.4    | 129.1    | 7.7     | 0.940356313 | 0.2763   | 1.066  |
| 93196_at   | 41.1   | 23.7   | 16.9   | 21.5   | 5.6    | 46     | 23.9   | 21.7   | 0.884785015 | 25.8     | 24.3     | 1.5     | 1.061728395 | 0.6309   | -1.274 |
| 93197_at   | 105.8  | 63.8   | 73.5   | 52.9   | 30.2   | 64.4   | 40.1   | 44.9   | 0.082678127 | 74       | 44.9     | 29.1    | 1.648106904 | 0.05742  | -1.654 |
| 93198_at   | 23.2   | 24.9   | 17.6   | 21     | 23.2   | 22.6   | 21.2   | 18.8   | 0.908132712 | 21.675   | 21.45    | 0.225   | 1.01048951  | 0.9674   | 1.004  |
| 93199_at   | 21.4   | 22.9   | 8.7    | 49.7   | 17.4   | 28.5   | 23.8   | 59.4   | 0.621909221 | 25.675   | 32.275   | 6.6     | 0.795507359 | 0.5227   | 1.35   |
| 93200_f_at | 43.8   | 43.6   | 63.9   | 61     | 42     | 55.4   | 64.5   | 59.1   | 0.774629591 | 53.075   | 55.25    | 2.175   | 0.960633484 | 0.7621   | 1.045  |
| 93201_at   | 99.7   | 52.4   | 73.7   | 99.4   | 45.8   | 140.2  | 71     | 42.9   | 0.814093001 | 81.3     | 74.975   | 6.325   | 1.084361454 | 0.6104   | -1.183 |
| 93202_at   | 190.3  | 153.9  | 232.6  | 197.6  | 67.4   | 179.2  | 143.3  | 156.9  | 0.10580656  | 193.6    | 136.7    | 56.9    | 1.416239941 | 0.1402   | -1.492 |
| 93203_f_at | 52.4   | 38.5   | 54.5   | 76.4   | 62.1   | 69.1   | 49.1   | 69.9   | 0.475003072 | 55.45    | 62.55    | 7.1     | 0.886490807 | 0.4208   | 1.151  |
| 93204_r_at | 9.8    | 13.6   | 13.9   | 16     | 8.2    | 18.8   | 15.2   | 17.7   | 0.57100189  | 13.325   | 14.975   | 1.65    | 0.889816361 | 0.7118   | 1.088  |
| 93205_at   | 16.8   | 14.9   | 9.2    | 11.6   | 10.7   | 12     | 10.5   | 11.1   | 0.31466779  | 13.125   | 11.075   | 2.05    | 1.18510158  | 0.335    | -1.155 |
| 93206_g_at | 160.6  | 108.2  | 71.1   | 71.5   | 84.9   | 140.7  | 88.2   | 85.4   | 0.908085669 | 102.85   | 99.8     | 3.05    | 1.030561122 | 0.9857   | 1.004  |
| 93207_at   | 39.9   | 43     | 34.8   | 31.8   | 27.1   | 57.2   | 27.9   | 26.8   | 0.757709624 | 37.375   | 34.75    | 2.625   | 1.075539568 | 0.5554   | -1.131 |
| 93208_at   | 15.1   | 8.1    | 8.8    | 20.9   | 13.4   | 25.8   | 18     | 30.5   | 0.12725762  | 13.225   | 21.925   | 8.7     | 0.603192702 | 0.116    | 1.706  |
| 93209_at   | 8.4    | 4.4    | 7.5    | 9.1    | 4.4    | 11.6   | 57.2   | 18.5   | 0.278188541 | 7.35     | 22.925   | 15.575  | 0.320610687 | 0.2201   | 2.149  |
| 93210_g_at | 87.2   | 70.3   | 75.5   | 71.8   | 56.7   | 82.7   | 84     | 110.1  | 0.570584245 | 76.2     | 83.375   | 7.175   | 0.913943028 | 0.6605   | 1.069  |
| 93211_at   | 536.9  | 400.4  | 562.3  | 420.4  | 247.2  | 418.3  | 468    | 400.8  | 0.175989809 | 480      | 383.575  | 96.425  | 1.251384996 | 0.1947   | -1.272 |
| 93212_at   | 71.9   | 104.9  | 276    | 192.2  | 84.7   | 161.2  | 370.7  | 209.9  | 0.573373005 | 161.25   | 206.625  | 45.375  | 0.780399274 | 0.5902   | 1.277  |
| 93213_at   | 21.7   | 3.7    | 9.9    | 7.3    | 11.2   | 9.1    | 8.5    | 15.7   | 0.915858382 | 10.65    | 11.125   | 0.475   | 0.957303371 | 0.6033   | 1.238  |
| 93214_at   | 51     | 61.2   | 89.1   | 91.9   | 28.8   | 55.4   | 83.6   | 85.9   | 0.581161273 | 73.3     | 63.425   | 9.875   | 1.155695704 | 0.5183   | -1.223 |
| 93215_at   | 426.8  | 420.7  | 484.9  | 395    | 232.6  | 477.9  | 513.2  | 428.3  | 0.789270184 | 431.85   | 413      | 18.85   | 1.045641646 | 0.6616   | -1.089 |
| 93216_at   | 7.6    | 19.2   | 7.7    | 15.3   | 3.7    | 16.8   | 22.5   | 35.6   | 0.373556371 | 12.45    | 19.65    | 7.2     | 0.633587786 | 0.6481   | 1.3    |



|            |         |         |        |         |         |        |         |         |             |          |           |         |             |         |        |
|------------|---------|---------|--------|---------|---------|--------|---------|---------|-------------|----------|-----------|---------|-------------|---------|--------|
| 93217_at   | 409.9   | 319.7   | 474.1  | 356.1   | 400.1   | 387.8  | 532.8   | 502.7   | 0.23179945  | 389.95   | 455.85    | 65.9    | 0.855434902 | 0.2272  | 1.171  |
| 93218_at   | 89.1    | 34.5    | 103.7  | 86.4    | 22.5    | 86.3   | 81.2    | 85.3    | 0.672933908 | 78.425   | 68.825    | 9.6     | 1.139484199 | 0.6803  | -1.197 |
| 93219_at   | 639.4   | 565.2   | 448.4  | 441.7   | 311     | 533.5  | 648.6   | 450.5   | 0.676819531 | 523.675  | 485.9     | 37.775  | 1.077742334 | 0.6087  | -1.102 |
| 93220_at   | 277.4   | 284.3   | 342.1  | 294.8   | 216.7   | 297    | 378.1   | 321.3   | 0.925619091 | 299.65   | 303.275   | 3.625   | 0.988047152 | 0.9734  | 1.004  |
| 93221_at   | 932.7   | 905.9   | 966.1  | 725.3   | 758.4   | 892.8  | 858.9   | 636.9   | 0.270062093 | 882.5    | 786.75    | 95.75   | 1.121703209 | 0.2848  | -1.124 |
| 93222_at   | 281.6   | 293     | 282.9  | 188     | 117.9   | 155.3  | 341.9   | 226.2   | 0.401834578 | 261.375  | 210.325   | 51.05   | 1.242719601 | 0.3079  | -1.327 |
| 93223_at   | 39.1    | 10.2    | 8.1    | 6.7     | 8       | 8      | 16.2    | 8.9     | 0.517472223 | 16.025   | 10.275    | 5.75    | 1.559610706 | 0.6385  | -1.24  |
| 93224_at   | 17.8    | 12      | 20.1   | 42      | 42      | 23.7   | 35.6    | 32      | 0.233200468 | 22.975   | 33.325    | 10.35   | 0.689422356 | 0.1618  | 1.582  |
| 93225_s_at | 734.4   | 505.4   | 481.4  | 546.3   | 480.7   | 720.2  | 621.4   | 580     | 0.672878375 | 566.875  | 600.575   | 33.7    | 0.943887108 | 0.645   | 1.063  |
| 93226_i_at | 4.9     | 1.4     | 2.3    | 1.6     | 5.1     | 11.7   | 0.4     | 8.5     | 0.209610688 | 2.55     | 6.425     | 3.875   | 0.39688716  | 0.5248  | 1.719  |
| 93227_f_at | 39      | 20.4    | 21.9   | 35.6    | 12.6    | 54.4   | 33.4    | 56.8    | 0.423155394 | 29.225   | 39.3      | 10.075  | 0.743638677 | 0.6506  | 1.203  |
| 93228_at   | 1038.5  | 655.5   | 987.4  | 873.4   | 659.9   | 798.6  | 835.9   | 818.1   | 0.301002958 | 888.7    | 778.125   | 110.575 | 1.142104418 | 0.3352  | -1.13  |
| 93230_at   | 26.1    | 16.9    | 12.8   | 13.2    | 13.3    | 19.8   | 19.7    | 15.1    | 0.940710843 | 17.25    | 16.975    | 0.275   | 1.016200295 | 0.9517  | 1.012  |
| 93231_at   | 180.2   | 205.6   | 369.9  | 255.6   | 105.4   | 193.4  | 278.5   | 204.3   | 0.337811504 | 252.825  | 195.4     | 57.425  | 1.29388434  | 0.3234  | -1.318 |
| 93232_at   | 291.2   | 380.7   | 242.2  | 226.4   | 293.8   | 284.9  | 214.6   | 249.3   | 0.56211922  | 285.125  | 260.65    | 24.475  | 1.093899866 | 0.5965  | -1.079 |
| 93234_at   | 117.4   | 59.9    | 72.5   | 90.1    | 88.2    | 119.1  | 74      | 102.3   | 0.515625977 | 84.975   | 95.9      | 10.925  | 0.886079249 | 0.4663  | 1.148  |
| 93235_at   | 135.9   | 146.5   | 192    | 224.3   | 140.3   | 195.2  | 222.1   | 220.5   | 0.505711294 | 174.675  | 194.525   | 19.85   | 0.897956561 | 0.508   | 1.118  |
| 93236_s_at | 920.7   | 826.5   | 919    | 748.1   | 754.2   | 888.7  | 793.7   | 651.3   | 0.252710844 | 853.575  | 771.975   | 81.6    | 1.105702905 | 0.2522  | -1.109 |
| 93237_s_at | 875     | 589.5   | 375.8  | 773.2   | 619     | 623.4  | 445.4   | 789.2   | 0.803643421 | 653.375  | 619.25    | 34.125  | 1.055106984 | 0.9137  | -1.025 |
| 93238_at   | 969.5   | 980.1   | 887.2  | 967.1   | 921.1   | 909.5  | 778.9   | 905.9   | 0.128128628 | 950.975  | 878.85    | 72.125  | 1.082067475 | 0.1301  | -1.084 |
| 93240_f_at | 768.7   | 707.1   | 927.4  | 911.2   | 990.6   | 863.5  | 1042.6  | 904.9   | 0.124997979 | 828.6    | 950.4     | 121.8   | 0.871843434 | 0.1235  | 1.151  |
| 93241_r_at | 51.8    | 29.3    | 55.9   | 78.9    | 76.7    | 70.3   | 63.4    | 69.9    | 0.212087769 | 53.975   | 70.075    | 16.1    | 0.770246165 | 0.1791  | 1.374  |
| 93242_at   | 21.1    | 14      | 17.7   | 21.5    | 17.5    | 18.9   | 19.6    | 17.6    | 0.928648357 | 18.575   | 18.4      | 0.175   | 1.00951087  | 0.9631  | 1.005  |
| 93243_at   | 263.4   | 162     | 244.9  | 240.7   | 188     | 194.3  | 200.8   | 188.3   | 0.218151975 | 227.75   | 192.85    | 34.9    | 1.180969666 | 0.2247  | -1.162 |
| 93244_at   | 16.4    | 52.1    | 61.5   | 48.9    | 27.6    | 23.4   | 61.2    | 36.2    | 0.578162499 | 44.725   | 37.1      | 7.625   | 1.205525606 | 0.7048  | -1.157 |
| 93245_at   | 89      | 60.2    | 39     | 34.4    | 40.7    | 40.1   | 38.6    | 30.8    | 0.242793895 | 55.65    | 37.55     | 18.1    | 1.482023968 | 0.1996  | -1.386 |
| 93246_at   | 294.8   | 319.7   | 341.8  | 563.1   | 253.9   | 200.2  | 500.2   | 460.9   | 0.797076142 | 379.85   | 353.8     | 26.05   | 1.073629169 | 0.6975  | -1.115 |
| 93248_at   | 147.7   | 132.3   | 143.4  | 163.2   | 173.1   | 146.6  | 176     | 167     | 0.084559692 | 146.65   | 165.675   | 19.025  | 0.885166742 | 0.08779 | 1.13   |
| 93250_r_at | 650.4   | 768.9   | 801.5  | 1134.8  | 855.9   | 937.8  | 927.3   | 937.8   | 0.521870358 | 838.9    | 914.7     | 75.8    | 0.9171313   | 0.4029  | 1.113  |
| 93251_at   | 461.5   | 366.5   | 336.3  | 367.6   | 483     | 491.6  | 600.1   | 472.5   | 0.018770716 | 382.975  | 511.8     | 128.825 | 0.748290348 | 0.01553 | 1.34   |
| 93252_at   | 1567.1  | 1776.9  | 1452.9 | 1357.8  | 1825.3  | 1552.4 | 1571.6  | 1399.2  | 0.714287852 | 1538.675 | 1587.125  | 48.45   | 0.969473104 | 0.7056  | 1.032  |
| 93253_at   | 202     | 330.8   | 477.9  | 441     | 349.1   | 495.2  | 431     | 246.5   | 0.838185222 | 362.925  | 380.45    | 17.525  | 0.953936128 | 0.7969  | 1.069  |
| 93254_at   | 2253.6  | 2189    | 2500.7 | 2657.7  | 2414.9  | 2474.8 | 2512.8  | 2569.9  | 0.465762728 | 2400.25  | 2493.1    | 92.85   | 0.96275721  | 0.4196  | 1.042  |
| 93255_at   | 1239.6  | 1160.9  | 1352   | 1570.7  | 1240.5  | 1460.4 | 1480.8  | 1493.8  | 0.447418901 | 1330.8   | 1418.875  | 88.075  | 0.937926174 | 0.4232  | 1.07   |
| 93256_at   | 407     | 409     | 361.5  | 350.9   | 313.5   | 579.5  | 358.9   | 402.9   | 0.631578211 | 382.1    | 413.7     | 31.6    | 0.923616147 | 0.705   | 1.056  |
| 93257_at   | 1508.5  | 1346.4  | 1489.5 | 1422.9  | 1517.6  | 1421.4 | 1545.2  | 1489.5  | 0.302355016 | 1441.825 | 1493.425  | 51.6    | 0.965448549 | 0.2997  | 1.036  |
| 93258_at   | 635     | 648.5   | 525.8  | 513.1   | 750.2   | 623.7  | 554     | 590.4   | 0.412549181 | 580.6    | 629.575   | 48.975  | 0.922209427 | 0.4059  | 1.083  |
| 93259_at   | 8.8     | 9       | 4      | 6.1     | 7.5     | 7.2    | 4.1     | 4.8     | 0.493471687 | 6.975    | 5.9       | 1.075   | 1.18220339  | 0.5697  | -1.158 |
| 93261_at   | 654     | 945.5   | 802.9  | 574.3   | 889.5   | 537.8  | 550.4   | 599.4   | 0.424625797 | 744.175  | 644.275   | 99.9    | 1.155058011 | 0.3933  | -1.159 |
| 93264_at   | 849.2   | 797     | 906    | 1114.1  | 722.1   | 997    | 845.9   | 936     | 0.668242123 | 916.575  | 875.25    | 41.325  | 1.047215081 | 0.6701  | -1.046 |
| 93265_at   | 112.5   | 32.7    | 118.6  | 36.8    | 96.5    | 52.3   | 118.6   | 103.2   | 0.550831283 | 75.15    | 92.65     | 17.5    | 0.811117107 | 0.4238  | 1.401  |
| 93266_at   | 544     | 401.2   | 447.9  | 467.7   | 386.5   | 579.5  | 484.7   | 480.4   | 0.734903549 | 465.2    | 482.775   | 17.575  | 0.963595878 | 0.7626  | 1.033  |
| 93267_at   | 1596    | 1310.4  | 1786.5 | 2349.1  | 1888.3  | 1589.2 | 2135.7  | 2100.9  | 0.536808271 | 1760.5   | 1928.525  | 168.025 | 0.912873828 | 0.4725  | 1.113  |
| 93268_at   | 1832.9  | 1907.3  | 2134.1 | 1977.9  | 2202.7  | 1950   | 2760    | 1835.1  | 0.364158449 | 1963.05  | 2186.95   | 223.9   | 0.897619973 | 0.35    | 1.102  |
| 93269_at   | 2852.1  | 2285.9  | 2489.6 | 2442.1  | 3231.1  | 2427.8 | 3777.5  | 2222.9  | 0.359779777 | 2517.425 | 2914.825  | 397.4   | 0.863662484 | 0.3727  | 1.135  |
| 93270_at   | 1132.8  | 1186.4  | 1268.4 | 1264.8  | 1450.5  | 1175.8 | 1229.8  | 1536.9  | 0.220630571 | 1213.1   | 1348.25   | 135.15  | 0.899758947 | 0.1998  | 1.106  |
| 93271_s_at | 13660.4 | 15060.4 | 11619  | 13111.8 | 11386.2 | 11520  | 14343.2 | 14269.1 | 0.673023787 | 13362.9  | 12879.625 | 483.275 | 1.037522443 | 0.6601  | -1.039 |
| 93272_at   | 563.3   | 512.4   | 444.4  | 475.1   | 451.7   | 601.9  | 558.9   | 486.2   | 0.567770716 | 498.8    | 524.675   | 25.875  | 0.950683757 | 0.5817  | 1.049  |
| 93273_at   | 71.8    | 144.5   | 100.7  | 50.5    | 100.7   | 132.7  | 56.7    | 87.5    | 0.925184108 | 91.875   | 94.4      | 2.525   | 0.973252119 | 0.8487  | 1.059  |
| 93274_at   | 2458.4  | 2367.2  | 1902.8 | 2104.7  | 2571.9  | 2020.6 | 2020.3  | 2651.1  | 0.632633924 | 2208.275 | 2315.975  | 107.7   | 0.953496907 | 0.6549  | 1.045  |
| 93275_at   | 527.5   | 662.2   | 707.8  | 622.9   | 464.5   | 419.3  | 630.6   | 565     | 0.124646491 | 630.1    | 519.85    | 110.25  | 1.212080408 | 0.125   | -1.221 |
| 93276_at   | 3621.5  | 3147.1  | 3164.9 | 2728.6  | 3015    | 2772.1 | 2979.5  | 2337.4  | 0.156642662 | 3165.525 | 2776      | 389.525 | 1.140318804 | 0.1619  | -1.14  |
| 93277_at   | 6120.1  | 7513.3  | 7421.3 | 7435.1  | 8014.7  | 7393.1 | 8020.4  | 8262.1  | 0.094596835 | 7122.45  | 7922.575  | 800.125 | 0.899006952 | 0.09396 | 1.115  |
| 93278_at   | 757.4   | 991.6   | 958.1  | 955.7   | 933.3   | 770.2  | 1616.9  | 966.2   | 0.473127898 | 915.7    | 1071.65   | 155.95  | 0.854476741 | 0.4984  | 1.13   |
| 93279_at   | 15.1    | 16      | 35.7   | 15.2    | 9.8     | 45.4   | 47.4    | 9       | 0.563458698 | 20.5     | 27.9      | 7.4     | 0.734767025 | 0.8615  | 1.097  |
| 93281_at   | 1022.3  | 1241.2  | 1425.9 | 1179.8  | 1464.3  | 1287.2 | 1219.3  | 1331.8  | 0.319768838 | 1217.3   | 1325.65   | 108.35  | 0.918266511 | 0.2961  | 1.094  |



|            |         |         |        |         |         |        |         |         |             |          |           |         |             |          |        |
|------------|---------|---------|--------|---------|---------|--------|---------|---------|-------------|----------|-----------|---------|-------------|----------|--------|
| 93282_at   | 11.9    | 17.5    | 15.6   | 12.7    | 14.1    | 17.1   | 14.3    | 17.4    | 0.443218148 | 14.425   | 15.725    | 1.3     | 0.917329094 | 0.4117   | 1.099  |
| 93283_at   | 172.3   | 131     | 131    | 153.1   | 132.4   | 220.8  | 98.8    | 134.6   | 0.994631168 | 146.85   | 146.65    | 0.2     | 1.001363791 | 0.8395   | 1.039  |
| 93284_at   | 2510.7  | 2060.5  | 2396   | 1992.9  | 2039.7  | 2463.1 | 1862.1  | 2322.7  | 0.725774902 | 2240.025 | 2171.9    | 68.125  | 1.031366545 | 0.7177   | -1.033 |
| 93285_at   | 1569.4  | 1210.1  | 1818.7 | 1879.2  | 827.5   | 895.1  | 1113.9  | 896     | 0.014085732 | 1619.35  | 933.125   | 686.225 | 1.735405224 | 0.003824 | -1.721 |
| 93287_at   | 114.2   | 127.7   | 95.3   | 139.9   | 71.9    | 97.7   | 94.6    | 68.7    | 0.026838949 | 119.275  | 83.225    | 36.05   | 1.433163112 | 0.02563  | -1.437 |
| 93288_at   | 3928.8  | 4125    | 3605.9 | 4108.1  | 4468.8  | 3574.7 | 4083.1  | 4298.2  | 0.504026152 | 3941.95  | 4106.2    | 164.25  | 0.959999513 | 0.5276   | 1.04   |
| 93290_at   | 1034.6  | 1133.1  | 851.7  | 761.7   | 1165.9  | 1182.4 | 1109    | 967.4   | 0.162607011 | 945.275  | 1106.175  | 160.9   | 0.854543811 | 0.1516   | 1.181  |
| 93293_at   | 13760.5 | 15840.8 | 11270  | 13554.3 | 13378.1 | 13006  | 15603.5 | 13743.5 | 0.778271282 | 13606.4  | 13932.775 | 326.375 | 0.976575018 | 0.7361   | 1.029  |
| 93294_at   | 552.7   | 580.6   | 566.9  | 1019.8  | 448.2   | 309.1  | 660.2   | 568.1   | 0.233969866 | 680      | 496.4     | 183.6   | 1.369863014 | 0.2009   | -1.375 |
| 93295_at   | 5959.2  | 5701.8  | 5381.2 | 5185.3  | 6506    | 6013.2 | 5137    | 5177    | 0.705104333 | 5556.875 | 5708.3    | 151.425 | 0.973472838 | 0.7357   | 1.023  |
| 93296_at   | 200.8   | 110.6   | 225.7  | 162.2   | 93.2    | 208.9  | 111.5   | 178.9   | 0.499348792 | 174.825  | 148.125   | 26.7    | 1.180253165 | 0.4829   | -1.203 |
| 93298_at   | 1480    | 1171.1  | 1473.4 | 1362.8  | 1308.4  | 1248.1 | 1488.3  | 1393.2  | 0.894862113 | 1371.825 | 1359.5    | 12.325  | 1.009065833 | 0.9213   | 1.007  |
| 93299_at   | 82.1    | 60.5    | 59.2   | 75.3    | 66.4    | 79.1   | 109.2   | 72      | 0.314915765 | 69.275   | 81.675    | 12.4    | 0.848178757 | 0.2956   | 1.168  |
| 93300_at   | 153.4   | 227     | 301.2  | 245.3   | 289.8   | 302.1  | 316     | 330.7   | 0.079249877 | 231.725  | 309.65    | 77.925  | 0.748344906 | 0.06997  | 1.373  |
| 93301_at   | 234.7   | 231.5   | 202.1  | 247.9   | 248.9   | 235.3  | 228.6   | 186.1   | 0.804512202 | 229.05   | 224.725   | 4.325   | 1.019245745 | 0.7834   | 1.022  |
| 93302_at   | 9.6     | 11.3    | 8.5    | 12.6    | 42.4    | 15.8   | 11.4    | 14.6    | 0.238114037 | 10.5     | 21.05     | 10.55   | 0.498812352 | 0.1103   | 1.759  |
| 93303_at   | 349.1   | 266.8   | 422.3  | 461.3   | 326.3   | 600.3  | 404.7   | 410.9   | 0.436109322 | 374.875  | 435.55    | 60.675  | 0.860693376 | 0.4361   | 1.158  |
| 93304_at   | 22.5    | 79.1    | 60.7   | 68.2    | 28.8    | 24.8   | 92.4    | 56.3    | 0.735485477 | 57.625   | 50.575    | 7.05    | 1.139396935 | 0.6945   | -1.188 |
| 93305_f_at | 949     | 1366.8  | 822.5  | 765.5   | 1335.4  | 1028   | 902.6   | 1020.1  | 0.584723201 | 975.95   | 1071.525  | 95.575  | 0.910804694 | 0.5025   | 1.115  |
| 93306_at   | 3706.3  | 3627.8  | 3629.7 | 3311    | 3991.3  | 3603.2 | 3407.9  | 3377.2  | 0.881003446 | 3568.7   | 3594.9    | 26.2    | 0.992711897 | 0.9002   | -1.006 |
| 93308_s_at | 90      | 110.5   | 112.4  | 147.6   | 116.6   | 104.8  | 110     | 116.3   | 0.809726194 | 115.125  | 111.925   | 3.2     | 1.028590574 | 0.9018   | 1.014  |
| 93309_at   | 627.2   | 627.2   | 857.5  | 603.6   | 540.9   | 679.3  | 843.1   | 727.3   | 0.835436225 | 678.875  | 697.65    | 18.775  | 0.973088225 | 0.844    | 1.026  |
| 93310_at   | 5287.9  | 5680.5  | 5481.4 | 5987.2  | 5449.5  | 4854.8 | 5535.5  | 5553.7  | 0.287558544 | 5609.25  | 5348.375  | 260.875 | 1.048776498 | 0.2914   | -1.049 |
| 93311_at   | 651.7   | 635.5   | 473.9  | 536.9   | 635.7   | 629.8  | 432.5   | 600.1   | 0.999700242 | 574.5    | 574.525   | 0.025   | 0.999956486 | 0.9771   | 1.004  |
| 93312_at   | 905.3   | 1273.9  | 1423.2 | 1779.6  | 1185.3  | 1141.4 | 1620.6  | 1389.3  | 0.959342505 | 1345.5   | 1334.15   | 11.35   | 1.008507289 | 0.9505   | 1.011  |
| 93313_at   | 29.2    | 7.5     | 5.6    | 4.7     | 16.2    | 32.6   | 21.4    | 2.7     | 0.47636307  | 11.75    | 18.225    | 6.475   | 0.644718793 | 0.561    | 1.524  |
| 93314_g_at | 572     | 580.8   | 770.7  | 659.5   | 484.2   | 699.9  | 593.6   | 666.5   | 0.619737568 | 645.75   | 611.05    | 34.7    | 1.056787497 | 0.6098   | -1.059 |
| 93315_at   | 544.8   | 503.3   | 705.9  | 746.9   | 490.5   | 582.8  | 562     | 661.3   | 0.49453353  | 625.225  | 574.15    | 51.075  | 1.088957589 | 0.5257   | -1.08  |
| 93316_at   | 1045.4  | 1094.9  | 1387.1 | 1398.3  | 1127.3  | 890.5  | 1236.5  | 1224.3  | 0.400470623 | 1231.425 | 1119.65   | 111.775 | 1.099830304 | 0.4151   | -1.099 |
| 93317_at   | 86.3    | 84      | 59.1   | 100.1   | 86.1    | 198.6  | 76.4    | 65.8    | 0.496051115 | 82.375   | 106.725   | 24.35   | 0.771843523 | 0.5468   | 1.189  |
| 93318_at   | 317.5   | 328.8   | 241.7  | 162.3   | 416.3   | 336.7  | 271.6   | 267.2   | 0.290764573 | 262.575  | 322.95    | 60.375  | 0.813051556 | 0.2848   | 1.255  |
| 93319_at   | 286.2   | 305.1   | 339.9  | 461.5   | 365.4   | 308.5  | 374.9   | 401     | 0.760180761 | 348.175  | 362.45    | 14.275  | 0.960615257 | 0.6722   | 1.055  |
| 93320_at   | 2764.8  | 2726.9  | 3055   | 3092.4  | 2908    | 2571.8 | 3488.3  | 3153.9  | 0.603393132 | 2909.775 | 3030.5    | 120.725 | 0.960163339 | 0.6359   | 1.037  |
| 93321_at   | 21.1    | 24.4    | 19     | 25.7    | 61.6    | 23.8   | 22.5    | 37.9    | 0.223516113 | 22.55    | 36.45     | 13.9    | 0.618655693 | 0.1522   | 1.494  |
| 93322_at   | 39.9    | 19.5    | 20.6   | 15.4    | 22.8    | 12.9   | 27.1    | 24.2    | 0.752205137 | 23.85    | 21.75     | 2.1     | 1.096551724 | 0.8237   | -1.063 |
| 93323_at   | 5644.5  | 4775.7  | 4846.2 | 4573.9  | 4375.8  | 5539.6 | 5228.4  | 5034.4  | 0.812316269 | 4960.075 | 5044.55   | 84.475  | 0.983254205 | 0.8175   | 1.017  |
| 93324_at   | 1243.9  | 1725.6  | 2464   | 3130.8  | 1852.5  | 1580.4 | 2590    | 2848.1  | 0.886175102 | 2141.075 | 2217.75   | 76.675  | 0.965426671 | 0.7957   | 1.069  |
| 93325_at   | 1317.3  | 1129.1  | 906    | 803.2   | 1028    | 998.8  | 748.8   | 811.9   | 0.338735656 | 1038.9   | 896.875   | 142.025 | 1.158355401 | 0.3478   | -1.148 |
| 93326_at   | 575.4   | 591.3   | 932.7  | 803.6   | 893     | 785.3  | 1022.2  | 982     | 0.112468902 | 725.75   | 920.625   | 194.875 | 0.78832315  | 0.1026   | 1.289  |
| 93327_at   | 683.2   | 758     | 850.3  | 794.7   | 705.2   | 786.9  | 854.1   | 886.6   | 0.517544555 | 771.55   | 808.2     | 36.65   | 0.954652314 | 0.5288   | 1.047  |
| 93328_at   | 399.7   | 369.8   | 302.4  | 252.4   | 265.5   | 329.8  | 247.4   | 254.2   | 0.19967953  | 331.075  | 274.225   | 56.85   | 1.207311514 | 0.193    | -1.197 |
| 93330_at   | 18.9    | 24.5    | 36     | 31.8    | 13.9    | 10     | 23.5    | 10.8    | 0.036926664 | 27.8     | 14.55     | 13.25   | 1.910652921 | 0.03043  | -1.973 |
| 93332_at   | 33.1    | 7.5     | 11.7   | 24      | 21.5    | 14.6   | 31.9    | 13.9    | 0.852492373 | 19.075   | 20.475    | 1.4     | 0.931623932 | 0.6749   | 1.186  |
| 93333_at   | 2673.9  | 3138    | 2579.7 | 2676    | 3105    | 2656.8 | 2982.3  | 2878.8  | 0.414606327 | 2766.9   | 2905.725  | 138.825 | 0.952223627 | 0.3951   | 1.052  |
| 93334_at   | 2.2     | 2.7     | 1      | 4.4     | 3.1     | 19.1   | 8.7     | 9.4     | 0.106889312 | 2.575    | 10.075    | 7.5     | 0.255583127 | 0.03594  | 3.693  |
| 93336_at   | 2352.5  | 1897    | 2068.9 | 1946.3  | 1993.9  | 2160.8 | 2398.7  | 2376.9  | 0.279973742 | 2066.175 | 2232.575  | 166.4   | 0.92546723  | 0.2741   | 1.081  |
| 93337_at   | 1249.6  | 1233    | 1460.2 | 1554.9  | 1551.2  | 1400.8 | 1722.4  | 1652.5  | 0.098215426 | 1374.425 | 1581.725  | 207.3   | 0.868940555 | 0.09886  | 1.153  |
| 93338_at   | 11.2    | 24.9    | 28.4   | 50.9    | 23.1    | 34.6   | 50.1    | 5.9     | 0.973872175 | 28.85    | 28.425    | 0.425   | 1.014951627 | 0.822    | -1.141 |
| 93339_at   | 655.8   | 687.4   | 843.8  | 992.7   | 919.4   | 793.9  | 1029.4  | 1047.5  | 0.171367561 | 794.925  | 947.55    | 152.625 | 0.838926706 | 0.1622   | 1.202  |
| 93340_f_at | 1007.7  | 1061.2  | 1532.5 | 1262.7  | 1745.3  | 1258.7 | 1425.4  | 1500.2  | 0.140090306 | 1216.025 | 1482.4    | 266.375 | 0.820308284 | 0.1292   | 1.227  |
| 93341_r_at | 3729.7  | 3786.2  | 3011.3 | 2201    | 3974.2  | 3783.9 | 3900.8  | 3255.1  | 0.247370497 | 3182.05  | 3728.5    | 546.45  | 0.853439721 | 0.2332   | 1.195  |
| 93342_at   | 533.8   | 481.9   | 517.7  | 474.8   | 581.8   | 503.7  | 532.5   | 494.1   | 0.329249155 | 502.05   | 528.025   | 25.975  | 0.950807253 | 0.3246   | 1.051  |
| 93346_at   | 1772.2  | 1923.4  | 1925.7 | 1603.9  | 2179.5  | 2394.6 | 2231.5  | 2053.9  | 0.007829505 | 1806.3   | 2214.875  | 408.575 | 0.815531351 | 0.008731 | 1.228  |
| 93347_at   | 865.6   | 944.7   | 1180.9 | 1318.4  | 915.3   | 1005.6 | 1044.5  | 1084.4  | 0.591122641 | 1077.4   | 1012.45   | 64.95   | 1.064151316 | 0.6476   | -1.051 |
| 93348_at   | 603.4   | 725.7   | 676.9  | 633     | 788.1   | 590.1  | 590.1   | 749.8   | 0.751185603 | 659.75   | 679.525   | 19.775  | 0.97089879  | 0.8      | 1.023  |
| 93349_at   | 3540.8  | 4191.4  | 3299.5 | 2064    | 3467.4  | 3226.7 | 2151    | 2621.5  | 0.479712314 | 3273.925 | 2866.65   | 407.275 | 1.1420735   | 0.5499   | -1.125 |



|            |        |        |        |        |        |        |        |        |             |          |          |         |             |          |        |
|------------|--------|--------|--------|--------|--------|--------|--------|--------|-------------|----------|----------|---------|-------------|----------|--------|
| 93350_f_at | 515.1  | 445.4  | 523.6  | 521.9  | 245.6  | 396.7  | 635.4  | 498    | 0.539597321 | 501.5    | 443.925  | 57.575  | 1.129695331 | 0.4223   | -1.194 |
| 93351_at   | 293.4  | 481.5  | 436.7  | 392.8  | 561.4  | 557.1  | 669.2  | 569.3  | 0.010531743 | 401.1    | 589.25   | 188.15  | 0.6806958   | 0.01377  | 1.489  |
| 93352_at   | 181.6  | 148.9  | 145.3  | 135    | 114.1  | 132.9  | 151.3  | 125.6  | 0.142158231 | 152.7    | 130.975  | 21.725  | 1.165871349 | 0.1286   | -1.165 |
| 93353_at   | 1891.1 | 2529.5 | 2120.3 | 2399   | 2578.6 | 2999.8 | 3950.4 | 3071.7 | 0.041782662 | 2234.975 | 3150.125 | 915.15  | 0.709487719 | 0.02182  | 1.401  |
| 93354_at   | 313.7  | 460.7  | 379.7  | 261.3  | 985.9  | 802.8  | 638.8  | 560.1  | 0.017639778 | 353.85   | 746.9    | 393.05  | 0.473758201 | 0.005272 | 2.108  |
| 93355_at   | 4.7    | 9.3    | 9.8    | 6.5    | 13.1   | 6.1    | 6.7    | 6.5    | 0.80807539  | 7.575    | 8.1      | 0.525   | 0.935185185 | 0.8334   | 1.056  |
| 93356_at   | 2727.3 | 2547.2 | 2180.9 | 1819.8 | 2311.2 | 2268.8 | 1981   | 1692.1 | 0.345734623 | 2318.8   | 2063.275 | 255.525 | 1.123844374 | 0.3668   | -1.119 |
| 93358_at   | 2729.2 | 2963   | 2631.4 | 2391.8 | 2742.5 | 2786.5 | 2333.6 | 2441.9 | 0.55057399  | 2678.85  | 2576.125 | 102.725 | 1.039875782 | 0.5533   | -1.04  |
| 93359_at   | 66.5   | 34.9   | 41.4   | 32.7   | 44.9   | 98.2   | 57.9   | 56.3   | 0.201651503 | 43.875   | 64.325   | 20.45   | 0.682083171 | 0.1513   | 1.461  |
| 93360_at   | 451.9  | 510.4  | 390.8  | 327.4  | 484.9  | 426    | 400.5  | 373.1  | 0.983522536 | 420.125  | 421.125  | 1       | 0.997625408 | 0.9224   | 1.011  |
| 93362_at   | 4632.2 | 4119.8 | 3832.8 | 3472.7 | 3313.9 | 4022.6 | 3879.1 | 3927.7 | 0.468871378 | 4014.375 | 3785.825 | 228.55  | 1.060369933 | 0.484    | -1.058 |
| 93364_at   | 1179.2 | 1234.2 | 1474.8 | 1331.8 | 1428.7 | 1043.9 | 1832.3 | 1535   | 0.427462896 | 1305     | 1459.975 | 154.975 | 0.893850922 | 0.4797   | 1.101  |
| 93365_s_at | 3742.1 | 3707.9 | 2947.4 | 3206.2 | 2512.9 | 2905.7 | 2705.4 | 2625   | 0.027357372 | 3400.9   | 2687.25  | 713.65  | 1.26556889  | 0.01228  | -1.261 |
| 93366_r_at | 1422   | 1390.2 | 1283.2 | 1463.9 | 1094.6 | 1222.1 | 1415.3 | 1041   | 0.094902245 | 1389.825 | 1193.25  | 196.575 | 1.164739158 | 0.07514  | -1.172 |
| 93367_at   | 13.8   | 25.3   | 61.3   | 62     | 124.2  | 26.5   | 135.9  | 101.1  | 0.103142291 | 40.6     | 96.925   | 56.325  | 0.418880578 | 0.1462   | 2.414  |
| 93369_at   | 31     | 32.5   | 28.8   | 21.8   | 30.4   | 27     | 31.5   | 21.5   | 0.786425885 | 28.525   | 27.6     | 0.925   | 1.033514493 | 0.7985   | -1.034 |
| 93370_at   | 62.7   | 43.8   | 55     | 69.9   | 13.7   | 44.7   | 24.4   | 57.1   | 0.100792528 | 57.85    | 34.975   | 22.875  | 1.654038599 | 0.1096   | -1.875 |
| 93371_at   | 150.6  | 186.6  | 218.8  | 273.3  | 168.8  | 239.1  | 274.1  | 257.7  | 0.458936691 | 207.325  | 234.925  | 27.6    | 0.882515696 | 0.4565   | 1.141  |
| 93372_at   | 1743   | 1406.8 | 1888.1 | 1498.3 | 1341.2 | 1579   | 2607.7 | 1725.9 | 0.57967218  | 1634.05  | 1813.45  | 179.4   | 0.901072541 | 0.6307   | 1.083  |
| 93373_at   | 420.2  | 443.3  | 533.5  | 524.8  | 507.1  | 392.7  | 380.2  | 508.1  | 0.488878552 | 480.45   | 447.025  | 33.425  | 1.074772104 | 0.4722   | -1.079 |
| 93374_at   | 92.2   | 105.1  | 87.7   | 135    | 94.7   | 70.7   | 51.7   | 108.4  | 0.203378324 | 105      | 81.375   | 23.625  | 1.290322581 | 0.1925   | -1.323 |
| 93375_at   | 34.2   | 24.4   | 20.9   | 29.7   | 41.2   | 42     | 29.3   | 23.9   | 0.257385753 | 27.3     | 34.1     | 6.8     | 0.80058651  | 0.2721   | 1.235  |
| 93376_at   | 79.2   | 109.3  | 145.7  | 187.2  | 162.6  | 106.7  | 185.1  | 147.9  | 0.508387385 | 130.35   | 150.575  | 20.225  | 0.865681554 | 0.4556   | 1.191  |
| 93378_at   | 135.3  | 158    | 216.3  | 240.9  | 148.4  | 264    | 239.3  | 251.4  | 0.330386087 | 187.625  | 225.775  | 38.15   | 0.831026464 | 0.3607   | 1.206  |
| 93379_at   | 306.4  | 299    | 284.7  | 308.1  | 179.2  | 200.7  | 220.5  | 187.7  | 0.00021471  | 299.55   | 197.025  | 102.525 | 1.520365436 | 0.000128 | -1.524 |
| 93380_at   | 51.7   | 32.3   | 101.3  | 83.8   | 16.3   | 72.9   | 24.2   | 20.5   | 0.150084003 | 67.275   | 33.475   | 33.8    | 2.009708738 | 0.1074   | -2.212 |
| 93381_at   | 14.1   | 16.9   | 27.1   | 18     | 14.3   | 13.3   | 13.8   | 16.4   | 0.202730284 | 19.025   | 14.45    | 4.575   | 1.316608997 | 0.1384   | -1.281 |
| 93382_at   | 117.1  | 121.3  | 88.8   | 109.5  | 102.1  | 160.5  | 92.9   | 74.2   | 0.934500937 | 109.175  | 107.425  | 1.75    | 1.016290435 | 0.785    | -1.052 |
| 93383_at   | 148.2  | 136.7  | 235.1  | 248.7  | 122.9  | 263.4  | 216.4  | 236.5  | 0.689821309 | 192.175  | 209.8    | 17.625  | 0.91599142  | 0.7283   | 1.087  |
| 93384_at   | 27.9   | 22.3   | 27.4   | 28     | 30.8   | 33.6   | 30.7   | 19.7   | 0.530770451 | 26.4     | 28.7     | 2.3     | 0.919860627 | 0.6281   | 1.07   |
| 93385_at   | 247    | 265.6  | 194.2  | 209.1  | 236.2  | 190.8  | 191.1  | 216.4  | 0.349865941 | 228.975  | 208.625  | 20.35   | 1.097543439 | 0.355    | -1.093 |
| 93386_at   | 136.2  | 182.7  | 76     | 117.4  | 129    | 154.4  | 179.7  | 158.9  | 0.321214216 | 128.075  | 155.5    | 27.425  | 0.823633441 | 0.2741   | 1.265  |
| 93387_at   | 20.8   | 25.9   | 21     | 23.7   | 19.6   | 41.1   | 29.7   | 31.6   | 0.180705545 | 22.85    | 30.5     | 7.65    | 0.749180328 | 0.1595   | 1.297  |
| 93388_s_at | 135.8  | 138.5  | 102    | 91.3   | 60.5   | 154.7  | 87.6   | 81.6   | 0.419826469 | 116.9    | 96.1     | 20.8    | 1.216441207 | 0.3199   | -1.272 |
| 93389_at   | 77.7   | 113.7  | 114    | 65.6   | 109.2  | 261.9  | 123.3  | 139.2  | 0.15708584  | 92.75    | 158.4    | 65.65   | 0.585542929 | 0.0812   | 1.651  |
| 93390_g_at | 37     | 43.7   | 46.1   | 23.9   | 34.4   | 100.6  | 20.2   | 51.6   | 0.490147443 | 37.675   | 51.7     | 14.025  | 0.728723404 | 0.6507   | 1.193  |
| 93391_at   | 102.9  | 107.3  | 80.4   | 112.8  | 119.5  | 115.2  | 81.2   | 93     | 0.909341044 | 100.85   | 102.225  | 1.375   | 0.986549279 | 0.9424   | 1.009  |
| 93392_at   | 63.1   | 33.4   | 63.4   | 63.9   | 67.3   | 76.1   | 37.5   | 54.8   | 0.800433059 | 55.95    | 58.925   | 2.975   | 0.949512092 | 0.8215   | 1.054  |
| 93393_at   | 328.4  | 234.7  | 230.7  | 248.8  | 246.5  | 290.8  | 251.8  | 264.3  | 0.918953569 | 260.65   | 263.35   | 2.7     | 0.989747484 | 0.8405   | 1.019  |
| 93394_at   | 4.1    | 1.3    | 7.2    | 6.8    | 1.8    | 1.5    | 3.5    | 1.9    | 0.144012015 | 4.85     | 2.175    | 2.675   | 2.229885057 | 0.1767   | -1.936 |
| 93395_g_at | 130.9  | 66.1   | 39.5   | 103.5  | 33.4   | 67     | 52.8   | 54.3   | 0.200846569 | 85       | 51.875   | 33.125  | 1.638554217 | 0.2077   | -1.532 |
| 93396_at   | 452.9  | 395.4  | 339.7  | 340.9  | 433.1  | 297.5  | 282.3  | 336    | 0.340450816 | 382.225  | 337.225  | 45      | 1.133442064 | 0.3036   | -1.141 |
| 93397_at   | 57.7   | 97.4   | 77.2   | 49.3   | 68.7   | 81.8   | 55.3   | 78.7   | 0.955348466 | 70.4     | 71.125   | 0.725   | 0.989806678 | 0.8541   | 1.034  |
| 93398_at   | 5.2    | 4.5    | 1.3    | 6.1    | 4.5    | 4.8    | 10.9   | 2.6    | 0.525139902 | 4.275    | 5.7      | 1.425   | 0.75        | 0.5398   | 1.346  |
| 93399_at   | 11.7   | 27.6   | 36.3   | 11.3   | 16.6   | 18.9   | 4.7    | 19.3   | 0.379213324 | 21.725   | 14.875   | 6.85    | 1.460504202 | 0.4297   | -1.466 |
| 93400_at   | 113.1  | 54.3   | 62.2   | 76     | 61.9   | 111    | 69.7   | 61.9   | 0.988016537 | 76.4     | 76.125   | 0.275   | 1.003612479 | 0.9821   | 1.005  |
| 93401_g_at | 16.5   | 4.3    | 15.9   | 14.1   | 1.5    | 7.4    | 23.7   | 7.2    | 0.642639826 | 12.7     | 9.95     | 2.75    | 1.27638191  | 0.4469   | -1.697 |
| 93402_i_at | 115.1  | 84.6   | 113.7  | 110.5  | 81.5   | 122.9  | 89.1   | 97.7   | 0.505699683 | 105.975  | 97.8     | 8.175   | 1.083588957 | 0.4899   | -1.088 |
| 93403_at   | 5.3    | 10.3   | 19.4   | 27.4   | 1.5    | 6.4    | 5.2    | 2.5    | 0.093907072 | 15.6     | 3.9      | 11.7    | 4           | 0.03425  | -3.889 |
| 93404_g_at | 27.3   | 26.3   | 63.3   | 69     | 25.1   | 33.1   | 78     | 78.2   | 0.710380565 | 46.475   | 53.6     | 7.125   | 0.867070896 | 0.7712   | 1.127  |
| 93405_at   | 49.9   | 38.4   | 68.5   | 95.2   | 57.1   | 40.9   | 67.7   | 90.2   | 0.953847666 | 63       | 63.975   | 0.975   | 0.984759672 | 0.9027   | 1.033  |
| 93406_at   | 211.5  | 128.6  | 162.7  | 156.1  | 110.5  | 127.6  | 136.8  | 141.7  | 0.129187789 | 164.725  | 129.15   | 35.575  | 1.275454897 | 0.09323  | -1.261 |
| 93407_at   | 34.8   | 24.8   | 6      | 10.9   | 3.9    | 6.3    | 14.1   | 6.3    | 0.179537111 | 19.125   | 7.65     | 11.475  | 2.5         | 0.1389   | -2.257 |
| 93408_at   | 101.2  | 133.1  | 147.7  | 208.6  | 169.7  | 194    | 156.8  | 183.9  | 0.30414578  | 147.65   | 176.1    | 28.45   | 0.838444066 | 0.2346   | 1.23   |
| 93409_at   | 83.2   | 49     | 34.3   | 55.3   | 77.5   | 101.6  | 73.5   | 59.9   | 0.1435995   | 55.45    | 78.125   | 22.675  | 0.70976     | 0.1284   | 1.454  |
| 93410_at   | 167.9  | 87.7   | 103.2  | 110.1  | 108.7  | 195.8  | 104.4  | 135.2  | 0.5190289   | 117.225  | 136.025  | 18.8    | 0.861790112 | 0.491    | 1.158  |



|            |       |        |        |        |        |       |        |        |             |         |          |         |             |         |        |
|------------|-------|--------|--------|--------|--------|-------|--------|--------|-------------|---------|----------|---------|-------------|---------|--------|
| 93411_at   | 469.8 | 546.7  | 719.1  | 940.3  | 671    | 550.9 | 718.4  | 737.8  | 0.996336483 | 668.975 | 669.525  | 0.55    | 0.999178522 | 0.8624  | 1.031  |
| 93412_at   | 13.9  | 11.8   | 13.5   | 10.7   | 9.3    | 14    | 11.6   | 7.8    | 0.300914629 | 12.475  | 10.675   | 1.8     | 1.168618267 | 0.2701  | -1.186 |
| 93413_at   | 229.3 | 239.9  | 246.2  | 146.7  | 261    | 179.1 | 195.3  | 211.9  | 0.903550929 | 215.525 | 211.825  | 3.7     | 1.017467249 | 0.9655  | 1.007  |
| 93414_at   | 22    | 26.8   | 12.2   | 28.5   | 27     | 32.9  | 25.2   | 22.7   | 0.332604428 | 22.375  | 26.95    | 4.575   | 0.830241187 | 0.3205  | 1.253  |
| 93416_at   | 31.4  | 7.2    | 24.2   | 35.7   | 13.5   | 48.6  | 20.5   | 15.4   | 0.990735642 | 24.625  | 24.5     | 0.125   | 1.005102041 | 0.9777  | 1.014  |
| 93417_at   | 251   | 217.6  | 207    | 239.6  | 156.6  | 273.2 | 291.6  | 214.8  | 0.879042148 | 228.8   | 234.05   | 5.25    | 0.977568896 | 0.9868  | 1.003  |
| 93418_g_at | 50.2  | 46.9   | 48.7   | 50.3   | 38.7   | 57.4  | 33.2   | 32.4   | 0.236810668 | 49.025  | 40.425   | 8.6     | 1.212739641 | 0.149   | -1.246 |
| 93419_at   | 414.8 | 484.6  | 490.6  | 459.8  | 608.4  | 605.2 | 436.5  | 445.6  | 0.297453708 | 462.45  | 523.925  | 61.475  | 0.882664504 | 0.296   | 1.121  |
| 93421_at   | 549.4 | 562.7  | 477    | 545.9  | 418.4  | 357.8 | 460.4  | 448.5  | 0.009968003 | 533.75  | 421.275  | 112.475 | 1.266987122 | 0.01242 | -1.27  |
| 93422_at   | 133.6 | 50.7   | 84     | 83.8   | 47.9   | 81.6  | 109.7  | 78.7   | 0.702553943 | 88.025  | 79.475   | 8.55    | 1.107581    | 0.7512  | -1.091 |
| 93423_at   | 173.7 | 255.9  | 317.6  | 340.2  | 221.6  | 352.2 | 174.1  | 250.8  | 0.690036892 | 271.85  | 249.675  | 22.175  | 1.08881546  | 0.6984  | -1.089 |
| 93424_at   | 879   | 1196.5 | 1101.2 | 1589.5 | 1287.1 | 958.2 | 1332.5 | 1538.1 | 0.663739347 | 1191.55 | 1278.975 | 87.425  | 0.931644481 | 0.633   | 1.082  |
| 93425_at   | 223   | 180.6  | 179.4  | 189.4  | 192.8  | 201.8 | 161.7  | 181.6  | 0.543625742 | 193.1   | 184.475  | 8.625   | 1.046754303 | 0.543   | -1.046 |
| 93426_at   | 683.6 | 680.3  | 956.7  | 863.5  | 810.5  | 828.8 | 736.8  | 1043.7 | 0.558534272 | 796.025 | 854.95   | 58.925  | 0.931077841 | 0.5368  | 1.077  |
| 93427_at   | 145   | 148.3  | 167.6  | 183.1  | 117.5  | 125.6 | 194.3  | 207.2  | 0.995459705 | 161     | 161.15   | 0.15    | 0.99906919  | 0.8727  | -1.026 |
| 93428_at   | 44.3  | 95.9   | 92.9   | 118.9  | 87.8   | 118.1 | 79.6   | 88.1   | 0.775062275 | 88      | 93.4     | 5.4     | 0.942184154 | 0.6537  | 1.116  |
| 93429_at   | 13.6  | 12.2   | 13.1   | 30.6   | 77.8   | 78.7  | 9.4    | 22.3   | 0.201831839 | 17.375  | 47.05    | 29.675  | 0.369287991 | 0.2358  | 2.096  |
| 93430_at   | 265.3 | 349.5  | 315.9  | 284.6  | 402.7  | 344.8 | 530.8  | 419.6  | 0.045012264 | 303.825 | 424.475  | 120.65  | 0.715766535 | 0.02272 | 1.388  |
| 93431_at   | 283.1 | 228.8  | 232.2  | 256.5  | 245.6  | 379.4 | 273    | 298.9  | 0.192301354 | 250.15  | 299.225  | 49.075  | 0.835992982 | 0.1575  | 1.185  |
| 93432_at   | 93.3  | 101.3  | 95.4   | 121.4  | 68.6   | 56.4  | 112    | 105.5  | 0.31334173  | 102.85  | 85.625   | 17.225  | 1.201167883 | 0.2634  | -1.244 |
| 93433_s_at | 10    | 11.8   | 7.9    | 6.4    | 29.4   | 12.4  | 17.9   | 5.5    | 0.246784652 | 9.025   | 16.3     | 7.275   | 0.553680982 | 0.2842  | 1.561  |
| 93434_at   | 262.4 | 262.3  | 235.7  | 224.3  | 263.9  | 330.9 | 218.1  | 279.2  | 0.346122075 | 246.175 | 273.025  | 26.85   | 0.901657357 | 0.3551  | 1.099  |
| 93435_at   | 25.9  | 19.1   | 18.1   | 24.2   | 21.7   | 15.3  | 4      | 16.8   | 0.146455841 | 21.825  | 14.45    | 7.375   | 1.510380623 | 0.1958  | -1.763 |
| 93436_i_at | 91.2  | 131.3  | 151.9  | 161.5  | 151.8  | 98.6  | 150.2  | 136.7  | 0.986570376 | 133.975 | 134.325  | 0.35    | 0.997394379 | 0.9475  | 1.011  |
| 93437_f_at | 248.9 | 301.5  | 321.8  | 324.8  | 381.1  | 257.7 | 338.9  | 404.7  | 0.267273497 | 299.25  | 345.6    | 46.35   | 0.865885417 | 0.2941  | 1.145  |
| 93439_f_at | 188.2 | 253.3  | 227.5  | 285.2  | 239.5  | 142.5 | 181.6  | 216    | 0.188857457 | 238.55  | 194.9    | 43.65   | 1.223961006 | 0.1953  | -1.233 |
| 93440_at   | 703.3 | 701.7  | 862.4  | 927.6  | 823.1  | 861.7 | 1070.9 | 841.7  | 0.261771594 | 798.75  | 899.35   | 100.6   | 0.888141435 | 0.2458  | 1.128  |
| 93441_at   | 262.9 | 342.6  | 398.6  | 553.4  | 454.5  | 259.1 | 588.7  | 438.9  | 0.633222344 | 389.375 | 435.3    | 45.925  | 0.894498047 | 0.6623  | 1.112  |
| 93442_at   | 188.5 | 167.8  | 337.9  | 273.6  | 164.8  | 254.2 | 194.5  | 204.1  | 0.433771766 | 241.95  | 204.4    | 37.55   | 1.183708415 | 0.475   | -1.152 |
| 93443_at   | 115.3 | 151.9  | 159.4  | 211.1  | 145.7  | 150.7 | 238.6  | 171.8  | 0.574657527 | 159.425 | 176.7    | 17.275  | 0.902235427 | 0.5512  | 1.111  |
| 93444_at   | 45    | 45.6   | 29.3   | 38.1   | 35.1   | 55.1  | 30.5   | 35.1   | 0.937370689 | 39.5    | 38.95    | 0.55    | 1.014120668 | 0.8852  | 1.025  |
| 93445_at   | 19.4  | 12.6   | 27.2   | 19.5   | 44.3   | 61.8  | 23.7   | 14     | 0.226741616 | 19.675  | 35.95    | 16.275  | 0.5472879   | 0.231   | 1.627  |
| 93446_at   | 60.8  | 95.2   | 119.2  | 92.9   | 44.2   | 60.1  | 154.8  | 94.1   | 0.897407893 | 92.025  | 88.3     | 3.725   | 1.04218573  | 0.6966  | -1.134 |
| 93447_at   | 165.1 | 154.4  | 131.1  | 149.4  | 136.8  | 242.7 | 164.8  | 139.2  | 0.469401839 | 150     | 170.875  | 20.875  | 0.877834674 | 0.485   | 1.111  |
| 93448_at   | 73.2  | 104    | 140.7  | 130    | 105    | 61.4  | 129    | 108.8  | 0.616792332 | 111.975 | 101.05   | 10.925  | 1.108114795 | 0.6382  | -1.114 |
| 93449_at   | 69.4  | 64.2   | 70     | 67.7   | 77.5   | 112.7 | 76.3   | 85     | 0.097970366 | 67.825  | 87.875   | 20.05   | 0.771834993 | 0.0377  | 1.279  |
| 93450_at   | 44.8  | 3.7    | 7.9    | 8.2    | 26.1   | 55    | 19.9   | 7.3    | 0.462946143 | 16.15   | 27.075   | 10.925  | 0.596491228 | 0.3119  | 2.097  |
| 93451_at   | 291.6 | 229.6  | 307.8  | 370.4  | 253.6  | 283.6 | 363.6  | 344.9  | 0.775281222 | 299.85  | 311.425  | 11.575  | 0.962832143 | 0.7585  | 1.043  |
| 93452_at   | 10.4  | 23     | 31.2   | 42.6   | 26.2   | 56.7  | 46.1   | 25.8   | 0.289138749 | 26.8    | 38.7     | 11.9    | 0.69250646  | 0.2815  | 1.535  |
| 93453_at   | 9.8   | 16     | 26     | 11.4   | 30.2   | 30.1  | 28.9   | 29.9   | 0.030818006 | 15.8    | 29.775   | 13.975  | 0.530646516 | 0.01687 | 2.029  |
| 93454_at   | 318.3 | 311.1  | 491.1  | 400.2  | 256.3  | 320.1 | 499.8  | 471.2  | 0.929715999 | 380.175 | 386.85   | 6.675   | 0.98274525  | 0.9924  | 1.002  |
| 93455_s_at | 311.5 | 267.5  | 311.5  | 249.5  | 245.5  | 380.9 | 295.9  | 302.8  | 0.538232123 | 285     | 306.275  | 21.275  | 0.930536283 | 0.5658  | 1.066  |
| 93456_r_at | 71    | 98     | 114.1  | 142.6  | 103.2  | 164.4 | 159.2  | 146.4  | 0.121414737 | 106.425 | 143.3    | 36.875  | 0.742672715 | 0.1349  | 1.368  |
| 93457_at   | 10.5  | 14.2   | 2.2    | 3.4    | 7.3    | 2.1   | 1.8    | 2.8    | 0.262119883 | 7.575   | 3.5      | 4.075   | 2.164285714 | 0.2623  | -1.961 |
| 93458_at   | 18    | 11.4   | 15.7   | 17.4   | 21.7   | 19.4  | 16.4   | 27.3   | 0.096453945 | 15.625  | 21.2     | 5.575   | 0.737028302 | 0.08911 | 1.355  |
| 93459_s_at | 502.7 | 644.2  | 572.2  | 698.9  | 402.1  | 635.9 | 819.4  | 782.7  | 0.620148771 | 604.5   | 660.025  | 55.525  | 0.915874399 | 0.7514  | 1.061  |
| 93460_at   | 28.8  | 53.1   | 63.3   | 50.2   | 45.3   | 70.7  | 59.5   | 56.7   | 0.346496323 | 48.85   | 58.05    | 9.2     | 0.841515935 | 0.3433  | 1.22   |
| 93461_at   | 12.8  | 4.6    | 8.4    | 6.6    | 12.9   | 4.1   | 4.2    | 8.1    | 0.78525511  | 8.1     | 7.325    | 0.775   | 1.105802048 | 0.6986  | -1.153 |
| 93462_at   | 5.8   | 5.8    | 8.3    | 1.4    | 8.4    | 13.3  | 6.6    | 5.2    | 0.230794885 | 5.325   | 8.375    | 3.05    | 0.635820896 | 0.2416  | 1.784  |
| 93463_at   | 124.5 | 140.2  | 336.1  | 281.6  | 66.7   | 140.5 | 267.2  | 128.4  | 0.339265091 | 220.6   | 150.7    | 69.9    | 1.463835435 | 0.3195  | -1.505 |
| 93464_at   | 104.9 | 81.4   | 66.5   | 320.9  | 53.6   | 67.7  | 327.2  | 304.9  | 0.653752119 | 143.425 | 188.35   | 44.925  | 0.761481285 | 0.7834  | 1.187  |
| 93465_at   | 342.7 | 367.7  | 283.4  | 279.4  | 310.5  | 398.2 | 266.3  | 216.1  | 0.664404454 | 318.3   | 297.775  | 20.525  | 1.068927882 | 0.583   | -1.088 |
| 93466_at   | 583.8 | 542.7  | 458.2  | 552.3  | 278.9  | 523.7 | 627.3  | 501.2  | 0.547484734 | 534.25  | 482.775  | 51.475  | 1.106623168 | 0.4762  | -1.149 |
| 93467_at   | 484.5 | 385.3  | 319.9  | 399.3  | 283.2  | 382.5 | 380.3  | 419.4  | 0.5153552   | 397.25  | 366.35   | 30.9    | 1.084345571 | 0.5284  | -1.084 |
| 93468_at   | 46.7  | 19.7   | 79.9   | 90.5   | 30.8   | 33.6  | 73.7   | 50.7   | 0.553856465 | 59.2    | 47.2     | 12      | 1.254237288 | 0.7459  | -1.146 |
| 93469_at   | 36.6  | 22.5   | 24.1   | 24.1   | 24.3   | 29.2  | 24     | 30.5   | 0.964126315 | 26.825  | 27       | 0.175   | 0.993518519 | 0.8769  | 1.021  |



|            |        |        |        |        |        |        |        |        |             |          |          |         |             |         |        |
|------------|--------|--------|--------|--------|--------|--------|--------|--------|-------------|----------|----------|---------|-------------|---------|--------|
| 93470_at   | 272.9  | 255.7  | 226.8  | 229.8  | 211.9  | 206.8  | 231.6  | 218.1  | 0.07008109  | 246.3    | 217.1    | 29.2    | 1.13450023  | 0.04903 | -1.132 |
| 93471_at   | 850    | 999.9  | 1129.7 | 1254.8 | 1279.8 | 1094.3 | 1042   | 1216.8 | 0.375694782 | 1058.6   | 1158.225 | 99.625  | 0.913984761 | 0.352   | 1.102  |
| 93472_at   | 1197.1 | 955    | 1439.3 | 1706.2 | 1092.8 | 1322.6 | 1668.4 | 1745   | 0.571194959 | 1324.4   | 1457.2   | 132.8   | 0.908866319 | 0.5631  | 1.106  |
| 93475_at   | 242.6  | 212.2  | 183.9  | 277.6  | 243.8  | 230.3  | 271.1  | 285.3  | 0.282279693 | 229.075  | 257.625  | 28.55   | 0.88918001  | 0.2601  | 1.134  |
| 93476_at   | 203.9  | 226.6  | 161.1  | 126.4  | 203.5  | 147.4  | 242.8  | 247.8  | 0.374626955 | 179.5    | 210.375  | 30.875  | 0.853238265 | 0.3933  | 1.177  |
| 93478_at   | 161.8  | 217.3  | 285    | 295.7  | 193.8  | 202.4  | 229.9  | 227.5  | 0.466933328 | 239.95   | 213.4    | 26.55   | 1.124414246 | 0.5533  | -1.096 |
| 93479_at   | 45.5   | 58.7   | 56.3   | 101.1  | 74.1   | 40.8   | 65.9   | 58.7   | 0.712852153 | 65.4     | 59.875   | 5.525   | 1.092275574 | 0.7701  | -1.068 |
| 93480_at   | 191.8  | 219.6  | 240.2  | 270.3  | 228.6  | 240.8  | 237    | 323.9  | 0.369375533 | 230.475  | 257.575  | 27.1    | 0.894787926 | 0.354   | 1.115  |
| 93481_at   | 252.9  | 257.1  | 263.3  | 300.5  | 242.8  | 320.5  | 266.9  | 267.3  | 0.775166657 | 268.45   | 274.375  | 5.925   | 0.978405467 | 0.7959  | 1.019  |
| 93482_at   | 3478.4 | 3093   | 3960.8 | 3897.3 | 2381.4 | 2942.7 | 3353   | 3237   | 0.078428467 | 3607.375 | 2978.525 | 628.85  | 1.211127991 | 0.08813 | -1.216 |
| 93483_at   | 347.9  | 345.1  | 268.7  | 254.3  | 246.8  | 304.5  | 330.8  | 287.3  | 0.715744959 | 304      | 292.35   | 11.65   | 1.039849495 | 0.7472  | -1.035 |
| 93484_at   | 103.2  | 107.4  | 162.2  | 103.7  | 70     | 114.9  | 149.5  | 134.4  | 0.934592135 | 119.125  | 117.2    | 1.925   | 1.016424915 | 0.8639  | -1.037 |
| 93485_at   | 971.3  | 1014.3 | 1092.4 | 1303.7 | 1189.4 | 957.2  | 1262.8 | 1057.9 | 0.83827714  | 1095.425 | 1116.825 | 21.4    | 0.980838538 | 0.8294  | 1.02   |
| 93486_at   | 26.4   | 82.7   | 141.5  | 194.9  | 95.4   | 79.1   | 180.4  | 197.2  | 0.592106014 | 111.375  | 138.025  | 26.65   | 0.806919036 | 0.4785  | 1.453  |
| 93488_at   | 1659.6 | 1473.5 | 1793.6 | 1336.8 | 1948.3 | 1588.1 | 1610.2 | 1512.8 | 0.505090627 | 1565.875 | 1664.85  | 98.975  | 0.9405502   | 0.4899  | 1.065  |
| 93489_at   | 6.8    | 2.5    | 2.8    | 6.4    | 3.8    | 9.8    | 4.8    | 3.2    | 0.696920389 | 4.625    | 5.4      | 0.775   | 0.856481481 | 0.6881  | 1.163  |
| 93490_at   | 2068.7 | 2033   | 1879   | 2000.8 | 2066.2 | 1626.2 | 1683.7 | 1939.6 | 0.213680081 | 1995.375 | 1828.925 | 166.45  | 1.091009746 | 0.1828  | -1.096 |
| 93491_f_at | 1024.9 | 1071.2 | 1245.4 | 1404.8 | 1260.2 | 1037.6 | 1384   | 1299.4 | 0.625454664 | 1186.575 | 1245.3   | 58.725  | 0.952842689 | 0.6144  | 1.052  |
| 93492_at   | 416.9  | 455.8  | 396.3  | 411.3  | 497.2  | 354.7  | 468.5  | 481.9  | 0.43248103  | 420.075  | 450.575  | 30.5    | 0.932308717 | 0.4794  | 1.065  |
| 93493_at   | 2079.4 | 1792.7 | 2138.9 | 2465.4 | 2069.7 | 2162.9 | 2572.4 | 2674.7 | 0.263401247 | 2119.1   | 2369.925 | 250.825 | 0.894163317 | 0.263   | 1.119  |
| 93495_at   | 2803.2 | 3874.6 | 2832.3 | 2930.2 | 3927.9 | 3552.7 | 3335   | 3305.6 | 0.215352193 | 3110.075 | 3530.3   | 420.225 | 0.880966207 | 0.1738  | 1.143  |
| 93496_at   | 5027.6 | 4268.3 | 4791.5 | 3541.1 | 4411.9 | 4525.5 | 4673.6 | 4054.8 | 0.980311354 | 4407.125 | 4416.45  | 9.325   | 0.997888576 | 0.9125  | 1.01   |
| 93497_at   | 344.3  | 532.9  | 428.6  | 499.7  | 522.4  | 492.1  | 535.4  | 673.5  | 0.12195495  | 451.375  | 555.85   | 104.475 | 0.812044616 | 0.1215  | 1.239  |
| 93498_s_at | 1821.4 | 1672.6 | 2576.7 | 2647.9 | 1989.1 | 1917.6 | 2441.5 | 2330   | 0.973034661 | 2179.65  | 2169.55  | 10.1    | 1.004655343 | 0.9378  | 1.011  |
| 93499_at   | 2598.2 | 2964.1 | 2536.7 | 2584   | 2906.7 | 2877.4 | 2957.1 | 2862.5 | 0.099450688 | 2670.75  | 2900.925 | 230.175 | 0.920654619 | 0.05948 | 1.088  |
| 93500_at   | 1954.3 | 1544.2 | 1752.2 | 1493.7 | 1854.1 | 1688.7 | 1462.3 | 1841.2 | 0.86114899  | 1686.1   | 1711.575 | 25.475  | 0.985116048 | 0.8505  | 1.016  |
| 93501_f_at | 1313   | 1194.8 | 1385.6 | 1136.5 | 1426   | 1593.5 | 1430   | 1330.8 | 0.053839459 | 1257.475 | 1445.075 | 187.6   | 0.870179748 | 0.05309 | 1.15   |
| 93502_r_at | 59.1   | 86.3   | 81.1   | 103.7  | 144.1  | 80.3   | 146    | 92.9   | 0.151799724 | 82.55    | 115.825  | 33.275  | 0.712713145 | 0.1426  | 1.383  |
| 93503_at   | 286.8  | 420.1  | 514    | 652.2  | 373    | 382    | 684.5  | 521.4  | 0.843109312 | 468.275  | 490.225  | 21.95   | 0.955224642 | 0.8072  | 1.059  |
| 93505_at   | 13.2   | 5.6    | 37.5   | 40     | 8.9    | 25.2   | 52.5   | 43.5   | 0.539764475 | 24.075   | 32.525   | 8.45    | 0.740199846 | 0.5541  | 1.47   |
| 93506_at   | 153.9  | 93.6   | 124.1  | 132.8  | 91.9   | 121    | 45.1   | 124.3  | 0.224342663 | 126.1    | 95.575   | 30.525  | 1.319382684 | 0.2431  | -1.397 |
| 93507_at   | 513.8  | 419.4  | 602.6  | 655.6  | 192.7  | 323.2  | 738.1  | 625.3  | 0.60083243  | 547.85   | 469.825  | 78.025  | 1.166072474 | 0.4354  | -1.312 |
| 93509_at   | 1156   | 1231.1 | 945.1  | 959.5  | 1211.5 | 911.5  | 988.8  | 1104.2 | 0.851858244 | 1072.925 | 1054     | 18.925  | 1.017955408 | 0.8581  | 1.017  |
| 93511_at   | 4139.6 | 4951.9 | 4095   | 4859.7 | 4857.1 | 4497.6 | 5839.9 | 5529.5 | 0.134556446 | 4511.55  | 5181.025 | 669.475 | 0.870783291 | 0.1309  | 1.147  |
| 93512_f_at | 1749.2 | 1833.6 | 1480.9 | 2086.8 | 1733.7 | 2708.7 | 2631.4 | 1806.5 | 0.203992046 | 1787.625 | 2220.075 | 432.45  | 0.805209283 | 0.1935  | 1.225  |
| 93513_at   | 37.2   | 48.8   | 20.7   | 49.8   | 62.4   | 84.7   | 13.3   | 30.2   | 0.649246101 | 39.125   | 47.65    | 8.525   | 0.821091291 | 0.9476  | 1.032  |
| 93514_at   | 4.3    | 4.7    | 13.3   | 5.1    | 9.8    | 5.4    | 4.6    | 3.7    | 0.717340372 | 6.85     | 5.875    | 0.975   | 1.165957447 | 0.7718  | -1.107 |
| 93515_at   | 50.8   | 108.5  | 47     | 29.3   | 41.1   | 215.5  | 34.2   | 71.4   | 0.527701912 | 58.9     | 90.55    | 31.65   | 0.650469354 | 0.6155  | 1.3    |
| 93516_at   | 125.6  | 86.3   | 66.7   | 91     | 59.3   | 117.7  | 81.6   | 44.5   | 0.441577593 | 92.4     | 75.775   | 16.625  | 1.219399538 | 0.3712  | -1.269 |
| 93517_at   | 2438.4 | 2722.9 | 3766.2 | 4342   | 2513.9 | 2960.5 | 4341.1 | 4463.1 | 0.716322828 | 3317.375 | 3569.65  | 252.275 | 0.929327805 | 0.7302  | 1.073  |
| 93518_at   | 1462.9 | 1387.9 | 1481.1 | 1427.7 | 1234.8 | 1053.6 | 1450.3 | 1201.2 | 0.083921099 | 1439.9   | 1234.975 | 204.925 | 1.165934533 | 0.05496 | -1.173 |
| 93519_s_at | 2097.3 | 2322.6 | 2174.2 | 2307.5 | 2498.9 | 2298.7 | 2561.6 | 2427.7 | 0.030023184 | 2225.4   | 2446.725 | 221.325 | 0.909542347 | 0.0308  | 1.1    |
| 93520_at   | 105.5  | 87.7   | 101.6  | 191.3  | 83.7   | 134.3  | 185.2  | 142.3  | 0.653666376 | 121.525  | 136.375  | 14.85   | 0.891109074 | 0.6196  | 1.133  |
| 93521_at   | 1247.3 | 1150.3 | 1434.1 | 1560.8 | 1184   | 1068.2 | 1231.1 | 1245   | 0.172187607 | 1348.125 | 1182.075 | 166.05  | 1.14047332  | 0.1519  | -1.135 |
| 93522_at   | 62     | 71     | 62.5   | 40.2   | 17.5   | 80.7   | 52.7   | 33.9   | 0.442598197 | 58.925   | 46.2     | 12.725  | 1.2754329   | 0.3319  | -1.446 |
| 93523_at   | 39.8   | 22.8   | 1.7    | 26.9   | 16.8   | 12.4   | 7.3    | 15.6   | 0.308676667 | 22.8     | 13.025   | 9.775   | 1.750479846 | 0.8611  | -1.146 |
| 93524_i_at | 7.5    | 9.5    | 5.8    | 6.7    | 6.3    | 69.4   | 9.7    | 39.6   | 0.20401247  | 7.375    | 31.25    | 23.875  | 0.236       | 0.1267  | 2.785  |
| 93525_f_at | 227.7  | 170.1  | 217.6  | 293.4  | 200.4  | 315.3  | 248.1  | 257.3  | 0.448860752 | 227.2    | 255.275  | 28.075  | 0.890020566 | 0.4317  | 1.13   |
| 93526_at   | 28.9   | 18.1   | 17.5   | 33.5   | 30     | 77.6   | 10.7   | 21.9   | 0.533025447 | 24.5     | 35.05    | 10.55   | 0.699001427 | 0.7574  | 1.154  |
| 93527_at   | 16.8   | 17.4   | 41.4   | 62.6   | 41.9   | 50.6   | 55.4   | 28.9   | 0.475226629 | 34.55    | 44.2     | 9.65    | 0.781674208 | 0.3339  | 1.455  |
| 93528_s_at | 567.9  | 587    | 462.7  | 499.2  | 611.7  | 642.2  | 532.8  | 597.9  | 0.123961136 | 529.2    | 596.15   | 66.95   | 0.88769605  | 0.1253  | 1.129  |
| 93529_at   | 432.8  | 634.3  | 659.6  | 910.1  | 688.6  | 745.7  | 990.9  | 825    | 0.247320201 | 659.2    | 812.55   | 153.35  | 0.811273152 | 0.2214  | 1.263  |
| 93530_at   | 316    | 283.3  | 365.8  | 355    | 368.6  | 343.5  | 347.6  | 282    | 0.845490635 | 330.025  | 335.425  | 5.4     | 0.983901021 | 0.8506  | 1.016  |
| 93531_at   | 1830.2 | 2067.6 | 1438.1 | 1417.4 | 1778.7 | 1696.2 | 1421.5 | 1479.8 | 0.624003803 | 1688.325 | 1594.05  | 94.275  | 1.059141809 | 0.6647  | -1.05  |
| 93532_at   | 11.7   | 32.1   | 38.2   | 11.3   | 31.6   | 14.9   | 36.5   | 36.8   | 0.474909228 | 23.325   | 29.95    | 6.625   | 0.778797997 | 0.4142  | 1.407  |
| 93533_at   | 1207.5 | 1312.5 | 1029.4 | 810.3  | 1302.4 | 831.1  | 901.2  | 868.8  | 0.490708456 | 1089.925 | 975.875  | 114.05  | 1.116869476 | 0.4809  | -1.118 |



|            |         |         |         |         |         |         |         |         |             |           |          |         |             |          |        |
|------------|---------|---------|---------|---------|---------|---------|---------|---------|-------------|-----------|----------|---------|-------------|----------|--------|
| 93534_at   | 11869.7 | 14945.4 | 9820    | 10779.8 | 13030.6 | 11013.5 | 13584.1 | 13202   | 0.528998797 | 11853.725 | 12707.55 | 853.825 | 0.932809629 | 0.4685   | 1.082  |
| 93535_at   | 362     | 358.3   | 495.4   | 729     | 366     | 349.1   | 481.8   | 573.9   | 0.687117115 | 486.175   | 442.7    | 43.475  | 1.098204201 | 0.7422   | -1.073 |
| 93536_at   | 898.6   | 894.4   | 814.3   | 721.6   | 840.7   | 830     | 919.3   | 959.1   | 0.333723024 | 832.225   | 887.275  | 55.05   | 0.937956102 | 0.3291   | 1.068  |
| 93538_at   | 704.8   | 549     | 756.5   | 1080.5  | 784.8   | 703.4   | 814     | 913.5   | 0.807602819 | 772.7     | 803.925  | 31.225  | 0.961159312 | 0.679    | 1.067  |
| 93539_at   | 1823.7  | 2050.4  | 1511.8  | 1622.4  | 2349.3  | 1734.7  | 1909.7  | 1729.9  | 0.379120275 | 1752.075  | 1930.9   | 178.825 | 0.907387747 | 0.3661   | 1.101  |
| 93540_at   | 1384    | 1489.2  | 1505.5  | 1469.8  | 1266.1  | 1194.2  | 1184.2  | 1432.9  | 0.03551784  | 1462.125  | 1269.35  | 192.775 | 1.151869067 | 0.02377  | -1.155 |
| 93541_at   | 3189.6  | 3665.9  | 2805.8  | 2449.6  | 2228.5  | 2417.5  | 2469.2  | 2461.1  | 0.090779318 | 3027.725  | 2394.075 | 633.65  | 1.264674248 | 0.04619  | -1.252 |
| 93542_at   | 337.7   | 183.9   | 492.9   | 382.3   | 587.9   | 690.8   | 680.2   | 522.6   | 0.015508039 | 349.2     | 620.375  | 271.175 | 0.562885352 | 0.02868  | 1.874  |
| 93543_f_at | 19553.9 | 16743.8 | 12376.1 | 13245.9 | 14576.2 | 16115.5 | 15549   | 14419.7 | 0.863895617 | 15479.925 | 15165.1  | 314.825 | 1.020759837 | 0.9667   | 1.005  |
| 93546_s_at | 4428.7  | 3860.9  | 4069.8  | 4459.8  | 3670    | 4349.1  | 4305.5  | 4110.8  | 0.667190245 | 4204.8    | 4108.85  | 95.95   | 1.023352033 | 0.6679   | -1.024 |
| 93547_at   | 4809.3  | 4140.5  | 4286.9  | 3808    | 3884.6  | 4397.7  | 3778.4  | 3924.9  | 0.335503109 | 4261.175  | 3996.4   | 264.775 | 1.066253378 | 0.33     | -1.064 |
| 93548_at   | 3462.6  | 3426.4  | 3043.8  | 2010.5  | 2787.6  | 3141.7  | 2856    | 2484.5  | 0.668555163 | 2985.825  | 2817.45  | 168.375 | 1.059761486 | 0.7852   | -1.04  |
| 93550_at   | 2508.3  | 2150.9  | 1613.5  | 1218.6  | 1651.1  | 1918.5  | 1478.9  | 1315.1  | 0.416706903 | 1872.825  | 1590.9   | 281.925 | 1.177211013 | 0.4761   | -1.146 |
| 93551_at   | 2615.6  | 2999.2  | 3099.2  | 3026.6  | 3345.7  | 2762.4  | 2900.1  | 2623.4  | 0.891473468 | 2935.15   | 2907.9   | 27.25   | 1.009371024 | 0.8666   | 1.011  |
| 93555_at   | 17.5    | 13.4    | 15.1    | 10.7    | 16.1    | 20.1    | 18.7    | 13.8    | 0.184367926 | 14.175    | 17.175   | 3       | 0.825327511 | 0.1921   | 1.218  |
| 93556_at   | 419.9   | 387.3   | 456.7   | 345.4   | 399.3   | 524.9   | 338.2   | 457.3   | 0.578587473 | 402.325   | 429.925  | 27.6    | 0.935802756 | 0.6176   | 1.06   |
| 93557_at   | 284.5   | 329.6   | 377     | 377.2   | 245.3   | 254.8   | 305.2   | 327.8   | 0.096346153 | 342.075   | 283.275  | 58.8    | 1.207572147 | 0.09849  | -1.209 |
| 93558_at   | 92.3    | 106.6   | 71.6    | 83.6    | 74.3    | 99.2    | 119.2   | 85.5    | 0.638937899 | 88.525    | 94.55    | 6.025   | 0.936277102 | 0.66     | 1.063  |
| 93559_at   | 2673.6  | 3294    | 2628.3  | 2547.7  | 3549.9  | 2730.2  | 2766.2  | 2432.1  | 0.786344353 | 2785.9    | 2869.6   | 83.7    | 0.970832172 | 0.8077   | 1.025  |
| 93560_at   | 1128.9  | 1168.9  | 1007.1  | 981.7   | 1241.8  | 1093.7  | 1176.8  | 1129.9  | 0.167478064 | 1071.65   | 1160.55  | 88.9    | 0.923398389 | 0.1595   | 1.085  |
| 93561_at   | 255.9   | 257.7   | 181.5   | 191.8   | 223.2   | 182.4   | 162.7   | 168.9   | 0.184418383 | 221.725   | 184.3    | 37.425  | 1.203065654 | 0.174    | -1.197 |
| 93562_at   | 2291.5  | 2529.3  | 2339.4  | 1799.3  | 3036.9  | 1645.4  | 2000.3  | 2247.3  | 0.983247986 | 2239.875  | 2232.475 | 7.4     | 1.003314707 | 0.8935   | -1.021 |
| 93563_s_at | 209.2   | 288.5   | 380.8   | 532.3   | 286.9   | 266.6   | 570     | 615.3   | 0.504610966 | 352.7     | 434.7    | 82      | 0.811364159 | 0.5336   | 1.217  |
| 93564_at   | 642.9   | 546.5   | 540.6   | 577.2   | 518.8   | 530.6   | 532.7   | 565     | 0.19027822  | 576.8     | 536.775  | 40.025  | 1.074565693 | 0.1591   | -1.073 |
| 93565_at   | 222.5   | 210.9   | 217.5   | 310.3   | 240.1   | 270.7   | 275.7   | 309.7   | 0.274019107 | 240.3     | 274.05   | 33.75   | 0.876847291 | 0.2265   | 1.151  |
| 93566_at   | 7.3     | 13.1    | 21.2    | 34.9    | 21.8    | 45.1    | 22.3    | 7.1     | 0.634912236 | 19.125    | 24.075   | 4.95    | 0.794392523 | 0.7064   | 1.222  |
| 93567_at   | 2513.6  | 2394.8  | 2876.5  | 2338.7  | 3053.6  | 3114.8  | 3169.1  | 3460.9  | 0.005304516 | 2530.9    | 3199.6   | 668.7   | 0.791005126 | 0.00462  | 1.267  |
| 93568_i_at | 286     | 389.5   | 379.1   | 441     | 518.6   | 379     | 306.3   | 550.4   | 0.375498068 | 373.9     | 438.575  | 64.675  | 0.852533774 | 0.4169   | 1.155  |
| 93569_f_at | 114.5   | 170.4   | 180.9   | 215.9   | 237.8   | 166.5   | 126.5   | 247.4   | 0.527890723 | 170.425   | 194.55   | 24.125  | 0.875995888 | 0.5796   | 1.129  |
| 93570_at   | 45.3    | 6.7     | 31.2    | 40.3    | 20.3    | 20.3    | 28.7    | 20      | 0.397192641 | 30.875    | 22.325   | 8.55    | 1.382978723 | 0.7998   | -1.128 |
| 93571_at   | 2311.1  | 2546.5  | 2173.8  | 3169    | 2321.8  | 2468.2  | 3231.9  | 2765    | 0.64032147  | 2550.1    | 2696.725 | 146.625 | 0.945628494 | 0.6148   | 1.06   |
| 93572_at   | 1468.1  | 1528.6  | 1502.4  | 1409.1  | 1603.6  | 1725.6  | 1637.8  | 1634    | 0.003315867 | 1477.05   | 1650.25  | 173.2   | 0.895046205 | 0.003322 | 1.117  |
| 93573_at   | 589.8   | 924     | 968.2   | 747.4   | 2462.9  | 1301.9  | 931.6   | 1471.3  | 0.107235222 | 807.35    | 1541.925 | 734.575 | 0.523598748 | 0.04041  | 1.827  |
| 93574_at   | 1582.9  | 2010.9  | 1831.5  | 1733.4  | 3064.5  | 2165.7  | 2757.8  | 2569.6  | 0.013038228 | 1789.675  | 2639.4   | 849.725 | 0.678061302 | 0.004853 | 1.469  |
| 93575_at   | 348.6   | 481.3   | 436.7   | 593.6   | 714.7   | 681.1   | 479.4   | 525.8   | 0.129901761 | 465.05    | 600.25   | 135.2   | 0.774760516 | 0.1287   | 1.296  |
| 93578_at   | 38.6    | 10.8    | 26.1    | 30.6    | 25.9    | 55      | 44.7    | 38      | 0.139844471 | 26.525    | 40.9     | 14.375  | 0.648533007 | 0.1735   | 1.64   |
| 93579_at   | 1523.8  | 1213.4  | 1295.7  | 877.7   | 1219.6  | 1252.8  | 1062.8  | 1206.7  | 0.780320655 | 1227.65   | 1185.475 | 42.175  | 1.035576457 | 0.889    | 1.018  |
| 93580_at   | 2052.6  | 1691.3  | 1912.7  | 1984.4  | 1631.9  | 1723.4  | 2013.9  | 1817.4  | 0.354512831 | 1910.25   | 1796.65  | 113.6   | 1.063228787 | 0.355    | -1.064 |
| 93581_at   | 3144.9  | 2843.7  | 2470.4  | 2407.9  | 2676.6  | 2963.7  | 2239.7  | 2511.4  | 0.623099058 | 2716.725  | 2597.85  | 118.875 | 1.045758993 | 0.6264   | -1.045 |
| 93582_at   | 778.4   | 713.9   | 700.3   | 616.9   | 761.1   | 724.6   | 672.6   | 647.5   | 0.983145278 | 702.375   | 701.45   | 0.925   | 1.001318697 | 0.9991   | 1      |
| 93583_s_at | 219     | 228.3   | 220.4   | 159.3   | 221.1   | 302.6   | 207.5   | 194.3   | 0.435114687 | 206.75    | 231.375  | 24.625  | 0.893571043 | 0.438    | 1.113  |
| 93584_at   | 42.4    | 102.5   | 71.8    | 42.7    | 81.2    | 83.2    | 78.1    | 85.7    | 0.316481915 | 64.85     | 82.05    | 17.2    | 0.790371725 | 0.2072   | 1.357  |
| 93585_at   | 46.7    | 11.9    | 44.6    | 44.2    | 21.2    | 124.8   | 61      | 44.3    | 0.337609832 | 36.85     | 62.825   | 25.975  | 0.58654994  | 0.3818   | 1.598  |
| 93586_at   | 692.8   | 603.4   | 691.8   | 557.1   | 546.2   | 699     | 578.2   | 610.5   | 0.576586105 | 636.275   | 608.475  | 27.8    | 1.04568799  | 0.5747   | -1.046 |
| 93587_at   | 250.9   | 254.1   | 197.8   | 176     | 209.6   | 358.4   | 216.5   | 248.2   | 0.377841229 | 219.7     | 258.175  | 38.475  | 0.850973177 | 0.3648   | 1.161  |
| 93588_at   | 1262.7  | 1297    | 1365.4  | 1262.7  | 1472.6  | 1213.9  | 1183.5  | 1335    | 0.954202299 | 1296.95   | 1301.25  | 4.3     | 0.996695485 | 0.9991   | 1      |
| 93589_at   | 1554    | 1240    | 1083.8  | 1241.5  | 1314.8  | 1260.2  | 1161.1  | 1255.7  | 0.77526577  | 1279.825  | 1247.95  | 31.875  | 1.025541889 | 0.8302   | -1.018 |
| 93590_at   | 439.3   | 463.5   | 537.5   | 579.4   | 423.4   | 371.5   | 434.7   | 490.1   | 0.117692709 | 504.925   | 429.925  | 75      | 1.174449032 | 0.1124   | -1.173 |
| 93591_at   | 849.1   | 875.2   | 617.6   | 559.4   | 725.5   | 794.1   | 606.4   | 635.1   | 0.716826425 | 725.325   | 690.275  | 35.05   | 1.050776864 | 0.7852   | -1.037 |
| 93592_at   | 12      | 23.5    | 16      | 22.6    | 17      | 13.5    | 7.7     | 13      | 0.143900969 | 18.525    | 12.8     | 5.725   | 1.447265625 | 0.1576   | -1.453 |
| 93593_f_at | 4752.7  | 5022.6  | 4091.1  | 3209.5  | 5497.3  | 4823.2  | 4385.9  | 4411.2  | 0.335115856 | 4268.975  | 4779.4   | 510.425 | 0.893203122 | 0.3182   | 1.131  |
| 93594_r_at | 511.3   | 307.7   | 306     | 472.1   | 263     | 541.3   | 337.6   | 386     | 0.835655868 | 399.275   | 381.975  | 17.3    | 1.045290922 | 0.8112   | -1.052 |
| 93595_at   | 1471.5  | 1873.2  | 1779.8  | 1466.3  | 2089.7  | 1718.4  | 2060.6  | 1854.8  | 0.085668334 | 1647.7    | 1930.875 | 283.175 | 0.853343691 | 0.08587  | 1.175  |
| 93596_i_at | 3541.1  | 3942    | 2090.6  | 1739    | 2908    | 2112.6  | 1766    | 1962.4  | 0.338008699 | 2828.175  | 2187.25  | 640.925 | 1.293027775 | 0.374    | -1.243 |
| 93597_at   | 27      | 19.1    | 5.5     | 26      | 12.3    | 43.6    | 27.9    | 16.2    | 0.541725513 | 19.4      | 25       | 5.6     | 0.776       | 0.5494   | 1.347  |
| 93598_at   | 377.7   | 301.3   | 239.9   | 294.3   | 339.2   | 331.7   | 350     | 387.6   | 0.187812663 | 303.3     | 352.125  | 48.825  | 0.861341853 | 0.1561   | 1.174  |



|            |        |        |        |        |        |        |        |        |             |          |          |         |             |          |        |
|------------|--------|--------|--------|--------|--------|--------|--------|--------|-------------|----------|----------|---------|-------------|----------|--------|
| 93599_at   | 1097.1 | 1560.4 | 1627   | 1854.6 | 1556.8 | 1188.6 | 1625.5 | 1494.7 | 0.728165027 | 1534.775 | 1466.4   | 68.375  | 1.046627796 | 0.8015   | -1.035 |
| 93600_at   | 1521   | 1463.2 | 1220.4 | 1318   | 1203   | 1504.7 | 1420.7 | 1382.5 | 0.976032724 | 1380.65  | 1377.725 | 2.925   | 1.002123065 | 0.9809   | -1.002 |
| 93601_at   | 20     | 25.2   | 28.8   | 32.2   | 8.4    | 25.3   | 12     | 14.4   | 0.046083835 | 26.55    | 15.025   | 11.525  | 1.767054908 | 0.04522  | -1.886 |
| 93602_at   | 442.8  | 511.9  | 610.5  | 632.4  | 378.2  | 373.7  | 495.1  | 550.7  | 0.159549503 | 549.4    | 449.425  | 99.975  | 1.222450909 | 0.1594   | -1.228 |
| 93603_at   | 569.5  | 635.9  | 534    | 507.8  | 606.1  | 516.5  | 596.7  | 545.1  | 0.906418332 | 561.8    | 566.1    | 4.3     | 0.992404169 | 0.8883   | -1.009 |
| 93604_f_at | 2294.4 | 2189.6 | 1955.9 | 1736.9 | 1333.7 | 1271.2 | 670.2  | 1013.8 | 0.002793813 | 2044.2   | 1072.225 | 971.975 | 1.906502833 | 0.007191 | -1.962 |
| 93605_r_at | 91.4   | 135.2  | 89.9   | 123.4  | 94.1   | 80.8   | 75.2   | 63.3   | 0.063432159 | 109.975  | 78.35    | 31.625  | 1.403637524 | 0.0458   | -1.395 |
| 93606_s_at | 588.1  | 477.4  | 449.1  | 425.9  | 250.6  | 316.9  | 260.6  | 288.9  | 0.006074152 | 485.125  | 279.25   | 205.875 | 1.737242614 | 0.000802 | -1.731 |
| 93608_at   | 88.6   | 126    | 99.3   | 108.2  | 98.1   | 170.7  | 83.2   | 103.6  | 0.710143735 | 105.525  | 113.9    | 8.375   | 0.926470588 | 0.797    | 1.047  |
| 93609_at   | 293.5  | 235.9  | 364.6  | 293.2  | 152.2  | 232    | 336.4  | 323.2  | 0.509395744 | 296.8    | 260.95   | 35.85   | 1.13738264  | 0.4525   | -1.178 |
| 93611_at   | 208.7  | 144.3  | 98.7   | 94.6   | 78.8   | 175    | 88.1   | 139.1  | 0.656299129 | 136.575  | 120.25   | 16.325  | 1.135758836 | 0.647    | -1.136 |
| 93612_at   | 56.6   | 21.4   | 62.7   | 69.2   | 62.8   | 80.8   | 66.5   | 72     | 0.191372288 | 52.475   | 70.525   | 18.05   | 0.744062389 | 0.217    | 1.467  |
| 93613_at   | 64.9   | 18.1   | 52.2   | 49.7   | 31.3   | 48.9   | 78.4   | 59.5   | 0.575034509 | 46.225   | 54.525   | 8.3     | 0.847776249 | 0.5592   | 1.237  |
| 93614_at   | 106.9  | 123.5  | 109    | 165.9  | 96.5   | 127.7  | 174.5  | 153.4  | 0.609909178 | 126.325  | 138.025  | 11.7    | 0.915232748 | 0.6388   | 1.084  |
| 93615_at   | 1436.5 | 1509.9 | 1558   | 1453.3 | 2015.1 | 1462.1 | 1753.7 | 1789.2 | 0.098205096 | 1489.425 | 1755.025 | 265.6   | 0.848663124 | 0.06118  | 1.171  |
| 93616_g_at | 745.6  | 760.2  | 882.3  | 676.5  | 780.9  | 712.4  | 944.6  | 739.9  | 0.689471891 | 766.15   | 794.45   | 28.3    | 0.964377871 | 0.6904   | 1.035  |
| 93617_at   | 140.1  | 88.2   | 98.6   | 103.5  | 104    | 136.6  | 89     | 119.5  | 0.769390918 | 107.6    | 112.275  | 4.675   | 0.958361167 | 0.7487   | 1.046  |
| 93618_at   | 84.2   | 77.4   | 51.7   | 68.6   | 43.9   | 52.9   | 40.9   | 40.1   | 0.026667106 | 70.475   | 44.45    | 26.025  | 1.585489314 | 0.01089  | -1.569 |
| 93619_at   | 185.3  | 180.2  | 211.5  | 248.3  | 214.2  | 136    | 195.3  | 211.5  | 0.503865393 | 206.325  | 189.25   | 17.075  | 1.090224571 | 0.4955   | -1.099 |
| 93620_at   | 765.6  | 854.9  | 978.3  | 887.8  | 775.8  | 553.3  | 753.1  | 763.2  | 0.059954232 | 871.65   | 711.35   | 160.3   | 1.225346173 | 0.07145  | -1.232 |
| 93621_at   | 946.7  | 762.6  | 970.3  | 1082.5 | 926.7  | 798.1  | 941    | 997    | 0.764397847 | 940.525  | 915.7    | 24.825  | 1.027110407 | 0.8076   | 1.022  |
| 93622_at   | 557.6  | 710.2  | 576.1  | 382.9  | 425.7  | 507.5  | 399.4  | 398.5  | 0.162566555 | 556.7    | 432.775  | 123.925 | 1.28634972  | 0.1483   | -1.262 |
| 93623_at   | 160.5  | 112.2  | 138.8  | 212.9  | 134.8  | 160    | 147.9  | 221.8  | 0.739399931 | 156.1    | 166.125  | 10.025  | 0.939653875 | 0.6945   | 1.074  |
| 93624_at   | 97.4   | 79.4   | 35.2   | 121.3  | 92.6   | 145.7  | 49.3   | 126.9  | 0.495204254 | 83.325   | 103.625  | 20.3    | 0.804101327 | 0.5404   | 1.265  |
| 93625_at   | 18.7   | 16.5   | 2.7    | 19.7   | 9.6    | 8      | 13.6   | 17.8   | 0.655936209 | 14.4     | 12.25    | 2.15    | 1.175510204 | 0.9544   | 1.031  |
| 93626_at   | 622.6  | 738.8  | 672.9  | 573.3  | 859.1  | 763.2  | 667.4  | 578.7  | 0.396265924 | 651.9    | 717.1    | 65.2    | 0.909078232 | 0.4126   | 1.093  |
| 93627_at   | 399    | 392    | 333    | 384.3  | 485.9  | 344.5  | 374.3  | 465.5  | 0.339786408 | 377.075  | 417.55   | 40.475  | 0.903065501 | 0.3504   | 1.099  |
| 93628_at   | 4.4    | 6.3    | 5.5    | 2.9    | 9.8    | 5.3    | 4.8    | 7.8    | 0.177855629 | 4.775    | 6.925    | 2.15    | 0.689530686 | 0.1784   | 1.44   |
| 93629_s_at | 2.7    | 2      | 1.7    | 1.1    | 0.5    | 1.5    | 1.8    | 1.4    | 0.235428578 | 1.875    | 1.3      | 0.575   | 1.442307692 | 0.2773   | -1.507 |
| 93630_at   | 29.5   | 55.4   | 84.8   | 88.2   | 12.8   | 9.7    | 83     | 55.6   | 0.324204761 | 64.475   | 40.275   | 24.2    | 1.600869025 | 0.2416   | -2.149 |
| 93631_at   | 90.2   | 55.1   | 40.8   | 53.5   | 37.6   | 85.6   | 60.8   | 61.9   | 0.916679557 | 59.9     | 61.475   | 1.575   | 0.974379829 | 0.9123   | 1.028  |
| 93632_g_at | 217.1  | 245.5  | 262.9  | 287.2  | 148.8  | 285.5  | 352.6  | 328.4  | 0.623047442 | 253.175  | 278.825  | 25.65   | 0.908006814 | 0.8161   | 1.051  |
| 93633_at   | 273.2  | 193.6  | 193.2  | 178.7  | 205.4  | 275.2  | 198    | 172    | 0.926112161 | 209.675  | 212.65   | 2.975   | 0.986009875 | 0.9261   | 1.013  |
| 93634_at   | 624.3  | 503.1  | 850.3  | 670.7  | 427.3  | 658.7  | 646.5  | 626.4  | 0.4556844   | 662.1    | 589.725  | 72.375  | 1.122726695 | 0.4779   | -1.12  |
| 93635_at   | 102.6  | 128.6  | 140.7  | 172.2  | 134.9  | 138.6  | 131.8  | 186.3  | 0.562189324 | 136.025  | 147.9    | 11.875  | 0.919709263 | 0.5259   | 1.095  |
| 93636_at   | 447.7  | 251.5  | 268.7  | 304    | 316.6  | 329.8  | 329.6  | 307.8  | 0.951255264 | 317.975  | 320.95   | 2.975   | 0.990730643 | 0.7956   | 1.036  |
| 93637_at   | 22.5   | 15.7   | 12.7   | 9.3    | 27.4   | 45.5   | 48.5   | 11.8   | 0.119362249 | 15.05    | 33.3     | 18.25   | 0.451951952 | 0.1062   | 2.039  |
| 93638_s_at | 7.5    | 4.3    | 1.9    | 1.6    | 2.2    | 3.3    | 2.3    | 2.7    | 0.447382829 | 3.825    | 2.625    | 1.2     | 1.457142857 | 0.6281   | -1.209 |
| 93639_r_at | 108.7  | 24.3   | 62.3   | 68.8   | 49.8   | 125.9  | 91.6   | 39.4   | 0.700523658 | 66.025   | 76.675   | 10.65   | 0.861102054 | 0.6905   | 1.188  |
| 93640_s_at | 2.4    | 1.6    | 5.5    | 2      | 13.5   | 1.7    | 0.5    | 7.5    | 0.407714768 | 2.875    | 5.8      | 2.925   | 0.495689655 | 0.8043   | 1.221  |
| 93642_at   | 41.3   | 35.3   | 45.3   | 38.3   | 123.9  | 38.8   | 52.5   | 38.6   | 0.335380462 | 40.05    | 63.45    | 23.4    | 0.631205674 | 0.2743   | 1.401  |
| 93643_at   | 202.3  | 229.8  | 345.8  | 291.2  | 348.3  | 271.4  | 409.4  | 367.2  | 0.107492353 | 267.275  | 349.075  | 81.8    | 0.765666404 | 0.11     | 1.32   |
| 93644_at   | 15.4   | 16.4   | 41.1   | 57.3   | 18     | 28.5   | 45.5   | 66.5   | 0.647119648 | 32.55    | 39.625   | 7.075   | 0.821451104 | 0.6021   | 1.27   |
| 93645_at   | 72.1   | 48.4   | 25     | 67.8   | 56.2   | 58.4   | 39     | 51.6   | 0.869985608 | 53.325   | 51.3     | 2.025   | 1.039473684 | 0.9171   | 1.029  |
| 93646_at   | 54.7   | 54.5   | 85.1   | 83.4   | 44.3   | 83.7   | 100.8  | 85.5   | 0.561138691 | 69.425   | 78.575   | 9.15    | 0.883550748 | 0.6573   | 1.108  |
| 93647_at   | 45.4   | 71.3   | 97.1   | 101.1  | 79.4   | 111.1  | 47.4   | 95.5   | 0.813645893 | 78.725   | 83.35    | 4.625   | 0.944511098 | 0.8359   | 1.058  |
| 93648_at   | 145.5  | 130.7  | 145.1  | 66.1   | 106    | 180.3  | 120.3  | 107.2  | 0.806787824 | 121.85   | 128.45   | 6.6     | 0.948618139 | 0.7507   | 1.078  |
| 93649_f_at | 16.8   | 17.7   | 11.9   | 15.5   | 11.5   | 18.2   | 13.1   | 15     | 0.613457452 | 15.475   | 14.45    | 1.025   | 1.070934256 | 0.6092   | -1.074 |
| 93650_i_at | 322.7  | 171.7  | 169.6  | 43.9   | 51.3   | 85     | 42.9   | 48.8   | 0.124808435 | 176.975  | 57       | 119.975 | 3.104824561 | 0.07674  | -2.593 |
| 93651_r_at | 102.2  | 197.8  | 195.4  | 79.7   | 192    | 104.5  | 111    | 87.8   | 0.62532146  | 143.775  | 123.825  | 19.95   | 1.161114476 | 0.6915   | -1.126 |
| 93652_i_at | 18.9   | 29.5   | 9.8    | 49.2   | 13.1   | 49.2   | 14     | 12.9   | 0.724941076 | 26.85    | 22.3     | 4.55    | 1.204035874 | 0.6732   | -1.233 |
| 93653_r_at | 44     | 9.7    | 4.9    | 30.3   | 24.8   | 54.3   | 60.2   | 31.1   | 0.155939924 | 22.225   | 42.6     | 20.375  | 0.521713615 | 0.1448   | 2.512  |
| 93654_at   | 11.8   | 29.4   | 16.6   | 22.7   | 25.2   | 8      | 16.5   | 9.4    | 0.366961593 | 20.125   | 14.775   | 5.35    | 1.362098139 | 0.316    | -1.433 |
| 93655_at   | 362    | 332.3  | 301.1  | 319.3  | 252.6  | 324.3  | 249.3  | 239.7  | 0.042799681 | 328.675  | 266.475  | 62.2    | 1.233417769 | 0.03452  | -1.24  |
| 93656_g_at | 352.8  | 187.1  | 271.2  | 259.9  | 159.5  | 257.3  | 293    | 256.3  | 0.576893789 | 267.75   | 241.525  | 26.225  | 1.108580892 | 0.601    | -1.109 |
| 93657_at   | 23     | 31     | 31.9   | 31.9   | 19.4   | 25.1   | 38.4   | 30.1   | 0.804266695 | 29.45    | 28.25    | 1.2     | 1.042477876 | 0.7105   | -1.066 |



|            |        |        |        |       |        |        |        |        |             |          |          |         |             |          |        |
|------------|--------|--------|--------|-------|--------|--------|--------|--------|-------------|----------|----------|---------|-------------|----------|--------|
| 93658_at   | 11.2   | 9.5    | 5.7    | 14.9  | 2.9    | 1.2    | 4.8    | 8.4    | 0.052050481 | 10.325   | 4.325    | 6       | 2.387283237 | 0.06366  | -2.86  |
| 93659_at   | 1.8    | 1.1    | 1.3    | 1.3   | 1.8    | 1.8    | 2      | 1.3    | 0.14847161  | 1.375    | 1.725    | 0.35    | 0.797101449 | 0.1999   | 1.233  |
| 93660_at   | 11     | 9.6    | 6.5    | 8.9   | 7.9    | 14.2   | 7.8    | 6.7    | 0.941793093 | 9        | 9.15     | 0.15    | 0.983606557 | 0.9581   | 1.011  |
| 93661_at   | 17.5   | 22.5   | 5.4    | 29.5  | 25.1   | 30.9   | 38.3   | 7.8    | 0.442851215 | 18.725   | 25.525   | 6.8     | 0.733594515 | 0.5516   | 1.384  |
| 93662_s_at | 49.7   | 121.7  | 133.4  | 146.4 | 118.4  | 37     | 54     | 151.9  | 0.541003666 | 112.8    | 90.325   | 22.475  | 1.248823692 | 0.4998   | -1.346 |
| 93663_r_at | 106.5  | 70.7   | 48.6   | 68.2  | 52.2   | 69.9   | 61.6   | 75.7   | 0.544711294 | 73.5     | 64.85    | 8.65    | 1.133384734 | 0.614    | -1.1   |
| 93664_at   | 298    | 284.8  | 633.1  | 416.7 | 191.4  | 305.7  | 367.1  | 281.5  | 0.238109824 | 408.15   | 286.425  | 121.725 | 1.424980361 | 0.2051   | -1.387 |
| 93665_at   | 24.8   | 39.3   | 15     | 49    | 15.5   | 19.5   | 19.8   | 50.1   | 0.617307272 | 32.025   | 26.225   | 5.8     | 1.221163012 | 0.5784   | -1.242 |
| 93666_at   | 226.6  | 227.3  | 203.8  | 170.2 | 149.6  | 250.5  | 232.2  | 226.5  | 0.778692367 | 206.975  | 214.7    | 7.725   | 0.964019562 | 0.8605   | 1.025  |
| 93667_at   | 213.6  | 208    | 236.4  | 204   | 208.5  | 224.1  | 207    | 191.4  | 0.461596125 | 215.5    | 207.75   | 7.75    | 1.037304452 | 0.4565   | -1.037 |
| 93668_at   | 17.3   | 16.4   | 13.4   | 22.7  | 12.8   | 19.5   | 21     | 12.7   | 0.756296882 | 17.45    | 16.5     | 0.95    | 1.057575758 | 0.7205   | -1.067 |
| 93669_f_at | 50.2   | 51.5   | 50.5   | 76.9  | 42.4   | 39.4   | 90.1   | 81.9   | 0.693776344 | 57.275   | 63.45    | 6.175   | 0.902679275 | 0.8371   | 1.053  |
| 93670_at   | 462.8  | 541    | 498.5  | 447.2 | 458.2  | 492.2  | 351.7  | 387.2  | 0.148571491 | 487.375  | 422.325  | 65.05   | 1.154028296 | 0.1392   | -1.161 |
| 93671_at   | 23     | 15.6   | 10.7   | 23.8  | 20.1   | 28.5   | 19.8   | 20.3   | 0.346469036 | 18.275   | 22.175   | 3.9     | 0.824126268 | 0.3047   | 1.261  |
| 93672_at   | 103.6  | 92.3   | 93.3   | 64.6  | 76.6   | 129.3  | 80.9   | 75.9   | 0.890520085 | 88.45    | 90.675   | 2.225   | 0.975461814 | 0.9382   | 1.013  |
| 93673_at   | 313    | 367    | 329.5  | 281.2 | 363.2  | 245.2  | 252.9  | 245.1  | 0.233308082 | 322.675  | 276.6    | 46.075  | 1.166576283 | 0.189    | -1.178 |
| 93674_at   | 208.8  | 256    | 320.9  | 375.2 | 220    | 201.8  | 269.1  | 292.9  | 0.343464246 | 290.225  | 245.95   | 44.275  | 1.180016263 | 0.3631   | -1.165 |
| 93675_at   | 84.7   | 40.9   | 51.8   | 58.8  | 72.6   | 90.1   | 35.5   | 69.4   | 0.613931361 | 59.05    | 66.9     | 7.85    | 0.882660688 | 0.6899   | 1.112  |
| 93676_at   | 999.9  | 809    | 891.4  | 867.5 | 740.4  | 1034   | 792.1  | 776.4  | 0.503815678 | 891.95   | 835.725  | 56.225  | 1.067276915 | 0.4464   | -1.074 |
| 93677_at   | 35.9   | 34.2   | 19.3   | 19.8  | 20.6   | 59.8   | 46.3   | 34     | 0.238731994 | 27.3     | 40.175   | 12.875  | 0.679527069 | 0.2592   | 1.425  |
| 93678_s_at | 3.8    | 9.7    | 9.7    | 2.2   | 4.3    | 15.1   | 18.3   | 4.4    | 0.361135572 | 6.35     | 10.525   | 4.175   | 0.603325416 | 0.4049   | 1.615  |
| 93679_at   | 18.5   | 22.2   | 23.5   | 20    | 28.1   | 50.1   | 31.6   | 30.7   | 0.065314442 | 21.05    | 35.125   | 14.075  | 0.599288256 | 0.01324  | 1.631  |
| 93680_at   | 437.2  | 372.5  | 491.3  | 577.4 | 400.7  | 331.4  | 317.2  | 409.8  | 0.091558315 | 469.6    | 364.775  | 104.825 | 1.287368926 | 0.07256  | -1.279 |
| 93681_at   | 889    | 1029.6 | 946.1  | 798.2 | 682.2  | 797    | 886.9  | 884    | 0.182560855 | 915.725  | 812.525  | 103.2   | 1.127011477 | 0.1894   | -1.128 |
| 93682_at   | 1275.8 | 1156.4 | 1131.3 | 899.2 | 1168.9 | 1251.2 | 1263.5 | 1107.1 | 0.395897665 | 1115.675 | 1197.675 | 82      | 0.931534014 | 0.3718   | 1.081  |
| 93683_at   | 15     | 21.4   | 14.2   | 9.5   | 13.7   | 19.4   | 4.8    | 7.9    | 0.413845448 | 15.025   | 11.45    | 3.575   | 1.312227074 | 0.3415   | -1.434 |
| 93685_at   | 28.5   | 8.3    | 6.4    | 14.2  | 7.1    | 48.2   | 8.7    | 8.2    | 0.756903535 | 14.35    | 18.05    | 3.7     | 0.79501385  | 0.9518   | 1.036  |
| 93686_s_at | 9.4    | 5.3    | 8      | 22.4  | 4.6    | 16     | 15     | 16.5   | 0.725635813 | 11.275   | 13.025   | 1.75    | 0.865642994 | 0.6981   | 1.194  |
| 93687_r_at | 18.6   | 15.7   | 11.1   | 12    | 15.4   | 20.8   | 14     | 18     | 0.283983914 | 14.35    | 17.05    | 2.7     | 0.841642229 | 0.2665   | 1.199  |
| 93688_at   | 5.3    | 3.7    | 1.7    | 2.8   | 2.3    | 5.7    | 2.9    | 5.4    | 0.565437902 | 3.375    | 4.075    | 0.7     | 0.828220859 | 0.5693   | 1.219  |
| 93689_at   | 284.8  | 219.4  | 251.7  | 231.7 | 256.4  | 356.5  | 277    | 196.2  | 0.531447184 | 246.9    | 271.525  | 24.625  | 0.909308535 | 0.5879   | 1.081  |
| 93690_at   | 378.1  | 395.3  | 594.4  | 504.8 | 163.6  | 434.9  | 856.4  | 385.3  | 0.960565683 | 468.15   | 460.05   | 8.1     | 1.017606782 | 0.6654   | -1.176 |
| 93691_s_at | 466.6  | 448.5  | 637.8  | 524.3 | 135.9  | 539.7  | 1177   | 487.1  | 0.784501416 | 519.3    | 584.925  | 65.625  | 0.887806129 | 0.7883   | -1.136 |
| 93692_f_at | 51.4   | 17.4   | 34.3   | 19.1  | 51.4   | 15.8   | 20.5   | 33.8   | 0.988084662 | 30.55    | 30.375   | 0.175   | 1.005761317 | 0.977    | 1.011  |
| 93693_at   | 612.2  | 705.9  | 732.5  | 973.4 | 707.4  | 575.5  | 851.9  | 760.4  | 0.750044872 | 756      | 723.8    | 32.2    | 1.044487427 | 0.7703   | -1.04  |
| 93694_at   | 43.2   | 30.2   | 41.2   | 59.7  | 36.5   | 20.5   | 42.3   | 66.8   | 0.863899869 | 43.575   | 41.525   | 2.05    | 1.049367851 | 0.7214   | -1.111 |
| 93695_at   | 367.3  | 451.6  | 375    | 360.7 | 274.9  | 474.3  | 296.8  | 287.3  | 0.343009219 | 388.65   | 333.325  | 55.325  | 1.165979149 | 0.2489   | -1.192 |
| 93696_at   | 17.6   | 8.3    | 8.7    | 10.5  | 11.2   | 13.9   | 37     | 14     | 0.296674296 | 11.275   | 19.025   | 7.75    | 0.592641261 | 0.2052   | 1.57   |
| 93697_at   | 697.8  | 590.4  | 734.1  | 782.3 | 552.5  | 455.6  | 510.7  | 560.9  | 0.012929627 | 701.15   | 519.925  | 181.225 | 1.348559888 | 0.008271 | -1.346 |
| 93698_at   | 701.6  | 548.3  | 696.4  | 696.5 | 651.5  | 747    | 587.4  | 551    | 0.659015446 | 660.7    | 634.225  | 26.475  | 1.041743861 | 0.654    | -1.043 |
| 93699_at   | 201.3  | 247.5  | 254    | 230.1 | 326.4  | 247.5  | 281.4  | 324.4  | 0.039195169 | 233.225  | 294.925  | 61.7    | 0.79079427  | 0.03263  | 1.262  |
| 93700_at   | 688.6  | 541.1  | 800.1  | 720.8 | 416.4  | 792.6  | 579.3  | 557.5  | 0.33077443  | 687.65   | 586.45   | 101.2   | 1.172563731 | 0.3028   | -1.192 |
| 93701_at   | 298.3  | 266.7  | 394.8  | 491   | 260.1  | 324.8  | 440.3  | 399.9  | 0.924169553 | 362.7    | 356.275  | 6.425   | 1.018033822 | 0.9617   | 1.009  |
| 93702_at   | 131.4  | 231.2  | 313.7  | 263.1 | 210.3  | 201.2  | 245.5  | 258.3  | 0.890219315 | 234.85   | 228.825  | 6.025   | 1.026330165 | 0.9342   | 1.017  |
| 93703_at   | 47.5   | 45.2   | 32.8   | 8     | 23.8   | 105.8  | 12.2   | 14.5   | 0.825087598 | 33.375   | 39.075   | 5.7     | 0.854126679 | 0.9298   | -1.061 |
| 93704_at   | 7.2    | 6.7    | 32.3   | 40.2  | 5.4    | 19.9   | 6.9    | 55.5   | 0.982895344 | 21.6     | 21.925   | 0.325   | 0.985176739 | 0.8892   | -1.11  |
| 93705_at   | 130    | 155.9  | 127.1  | 161.8 | 156.8  | 172.1  | 141.5  | 110.8  | 0.923070716 | 143.7    | 145.3    | 1.6     | 0.9889883   | 0.9739   | 1.004  |
| 93706_at   | 192.6  | 148.7  | 182.2  | 183.1 | 131.5  | 214.1  | 243.5  | 168.9  | 0.653608575 | 176.65   | 189.5    | 12.85   | 0.932189974 | 0.757    | 1.049  |
| 93707_f_at | 52.9   | 39     | 51.1   | 51.7  | 46.5   | 83.6   | 51.3   | 65.4   | 0.220761143 | 48.675   | 61.7     | 13.025  | 0.788897893 | 0.1963   | 1.244  |
| 93708_at   | 251.4  | 280.6  | 345.4  | 329.9 | 204.1  | 261.8  | 295.1  | 359.7  | 0.602642511 | 301.825  | 280.175  | 21.65   | 1.077273133 | 0.5543   | -1.091 |
| 93709_at   | 227.6  | 194.9  | 191.8  | 223.2 | 192.2  | 260.4  | 133.3  | 193.8  | 0.62981299  | 209.375  | 194.925  | 14.45   | 1.074131076 | 0.53     | -1.101 |
| 93710_at   | 1058.2 | 1292.8 | 976.9  | 1020  | 1111.5 | 1245.4 | 1046.7 | 752.6  | 0.717964954 | 1086.975 | 1039.05  | 47.925  | 1.046123863 | 0.6699   | -1.057 |
| 93711_at   | 799.6  | 717.1  | 1050.2 | 564.9 | 336.9  | 863.1  | 1027.4 | 693.8  | 0.780099912 | 782.95   | 730.3    | 52.65   | 1.07209366  | 0.6703   | -1.132 |
| 93712_at   | 578.9  | 547.6  | 569.2  | 362.9 | 396.2  | 559.6  | 432.2  | 385.1  | 0.315525043 | 514.65   | 443.275  | 71.375  | 1.161017427 | 0.3456   | -1.154 |
| 93713_at   | 192.7  | 155.7  | 261    | 238.6 | 80.9   | 194    | 292.1  | 230.2  | 0.811339626 | 212      | 199.3    | 12.7    | 1.063723031 | 0.6536   | -1.154 |
| 93714_f_at | 56.5   | 323.6  | 450.9  | 301.6 | 344    | 409    | 612.7  | 322.3  | 0.239053047 | 283.15   | 422      | 138.85  | 0.670971564 | 0.2628   | 1.829  |



|            |         |         |         |         |         |         |         |         |             |           |           |         |             |         |        |
|------------|---------|---------|---------|---------|---------|---------|---------|---------|-------------|-----------|-----------|---------|-------------|---------|--------|
| 93715_at   | 8.8     | 4       | 4.4     | 9.6     | 7.3     | 10.7    | 7       | 3.4     | 0.854102261 | 6.7       | 7.1       | 0.4     | 0.943661972 | 0.8725  | 1.057  |
| 93716_at   | 148     | 82.2    | 74.1    | 109.6   | 68.5    | 93.7    | 96.6    | 78.2    | 0.345315056 | 103.475   | 84.25     | 19.225  | 1.228189911 | 0.3491  | -1.195 |
| 93717_at   | 66.1    | 29.8    | 38.8    | 53.3    | 40.2    | 30      | 28.4    | 56.1    | 0.448093405 | 47        | 38.675    | 8.325   | 1.215255333 | 0.454   | -1.207 |
| 93718_at   | 124.4   | 81.8    | 139.3   | 133.9   | 40.1    | 102.2   | 148.5   | 171.7   | 0.900551657 | 119.85    | 115.625   | 4.225   | 1.036540541 | 0.6841  | -1.161 |
| 93719_at   | 193.9   | 202.9   | 155.9   | 271     | 151.1   | 223.9   | 308.4   | 239.9   | 0.560283279 | 205.925   | 230.825   | 24.9    | 0.89212607  | 0.6024  | 1.108  |
| 93720_at   | 414.9   | 358     | 351.3   | 346.1   | 234.6   | 319.6   | 348.1   | 347.2   | 0.137883102 | 367.575   | 312.375   | 55.2    | 1.176710684 | 0.143   | -1.188 |
| 93721_at   | 129.4   | 64.7    | 84.3    | 113.8   | 37      | 93.8    | 113.8   | 94.8    | 0.571823865 | 98.05     | 84.85     | 13.2    | 1.155568651 | 0.5453  | -1.21  |
| 93722_at   | 281.4   | 204.5   | 215     | 245.6   | 152.4   | 245.4   | 237.2   | 257.1   | 0.662447919 | 236.625   | 223.025   | 13.6    | 1.060979711 | 0.6289  | -1.074 |
| 93723_at   | 35.3    | 19.1    | 69.3    | 29.4    | 21      | 54.8    | 24.1    | 18.3    | 0.551804812 | 38.275    | 29.55     | 8.725   | 1.295262267 | 0.5197  | -1.282 |
| 93724_at   | 116.8   | 112.1   | 192.9   | 177.6   | 122.2   | 114.8   | 118.7   | 145.8   | 0.330341474 | 149.85    | 125.375   | 24.475  | 1.195214357 | 0.3462  | -1.166 |
| 93725_at   | 88.7    | 78.4    | 54.1    | 95.1    | 119.2   | 125.6   | 43.8    | 64.6    | 0.697086418 | 79.075    | 88.3      | 9.225   | 0.895526614 | 0.8855  | 1.043  |
| 93727_at   | 1794    | 1576.1  | 1925.7  | 1947.8  | 1496.1  | 1384.6  | 1785.1  | 1696.5  | 0.128879707 | 1810.9    | 1590.575  | 220.325 | 1.138519089 | 0.1337  | -1.14  |
| 93728_at   | 6870.4  | 7918.3  | 7076.4  | 7278    | 8360.6  | 7201.4  | 9002.6  | 8448    | 0.080756352 | 7285.775  | 8253.15   | 967.375 | 0.882787178 | 0.0719  | 1.131  |
| 93729_at   | 295.7   | 224.3   | 267.7   | 331     | 275.5   | 284.9   | 353.9   | 305.4   | 0.412198614 | 279.675   | 304.925   | 25.25   | 0.917192752 | 0.3914  | 1.096  |
| 93730_at   | 14608.1 | 16396.2 | 10669.2 | 12487.5 | 12944   | 13325.3 | 13235.1 | 13359.1 | 0.811884613 | 13540.25  | 13215.875 | 324.375 | 1.024544345 | 0.9077  | 1.011  |
| 93731_at   | 2335.2  | 2787.5  | 2698.9  | 2885.4  | 2724.6  | 3109.3  | 3025    | 2946.3  | 0.114735045 | 2676.75   | 2951.3    | 274.55  | 0.906973198 | 0.1175  | 1.105  |
| 93732_f_at | 412.9   | 427.2   | 504.8   | 447.5   | 399.3   | 484.2   | 425.4   | 426.5   | 0.616798072 | 448.1     | 433.85    | 14.25   | 1.032845453 | 0.6123  | -1.032 |
| 93733_r_at | 161     | 135     | 222.3   | 185.9   | 142     | 116.2   | 208.3   | 217     | 0.873136884 | 176.05    | 170.875   | 5.175   | 1.030285296 | 0.8097  | -1.048 |
| 93734_i_at | 1379.3  | 1494.8  | 1450.5  | 1325.5  | 1576.4  | 1355.5  | 1420.7  | 1270.8  | 0.932398188 | 1412.525  | 1405.85   | 6.675   | 1.004748017 | 0.9015  | 1.007  |
| 93735_f_at | 2270.1  | 2219.8  | 1833.2  | 1680.2  | 2334.1  | 2098.4  | 1948    | 1842.6  | 0.771032533 | 2000.825  | 2055.775  | 54.95   | 0.973270421 | 0.7396  | 1.032  |
| 93736_at   | 1484.2  | 990.4   | 1076.8  | 869.2   | 1132.1  | 1408.7  | 1060    | 894.7   | 0.916560916 | 1105.15   | 1123.875  | 18.725  | 0.983338894 | 0.8779  | 1.024  |
| 93737_at   | 568.4   | 463.2   | 595.3   | 456     | 504     | 565.7   | 522.2   | 552.2   | 0.711122956 | 520.725   | 536.025   | 15.3    | 0.971456555 | 0.6509  | 1.036  |
| 93738_at   | 139.9   | 152.8   | 217.2   | 179.5   | 136     | 171.4   | 213.7   | 162.3   | 0.951166818 | 172.35    | 170.85    | 1.5     | 1.008779631 | 0.9561  | 1.008  |
| 93740_at   | 11520.5 | 12479.8 | 8735.2  | 10290.2 | 10656.1 | 9914.6  | 9233    | 10887.8 | 0.54686524  | 10756.425 | 10172.875 | 583.55  | 1.057363331 | 0.5886  | -1.05  |
| 93741_at   | 448.3   | 484.9   | 546.1   | 468.1   | 576.9   | 564.6   | 490.8   | 452.7   | 0.385634783 | 486.85    | 521.25    | 34.4    | 0.934004796 | 0.3919  | 1.068  |
| 93742_at   | 438.7   | 565.9   | 518.1   | 439.3   | 502.6   | 483.7   | 518.5   | 448.9   | 0.954978881 | 490.5     | 488.425   | 2.075   | 1.004248349 | 0.9963  | 1      |
| 93743_at   | 1782.4  | 1394.9  | 1078.7  | 1256    | 1085.3  | 1416.4  | 1266.3  | 1283.2  | 0.520119657 | 1378      | 1262.8    | 115.2   | 1.091225847 | 0.553   | -1.078 |
| 93744_at   | 206.9   | 224     | 166.2   | 189.8   | 128.7   | 199.4   | 200.5   | 85.6    | 0.231563236 | 196.725   | 153.55    | 43.175  | 1.281178769 | 0.21    | -1.35  |
| 93747_at   | 1944.1  | 1599.9  | 2007.7  | 1798    | 2600    | 2128    | 2073.2  | 1971.8  | 0.083637635 | 1837.425  | 2193.25   | 355.825 | 0.837763593 | 0.06851 | 1.191  |
| 93748_at   | 2042    | 2136    | 2547    | 2808.6  | 2084.1  | 1891.5  | 2460.4  | 2308.1  | 0.405025137 | 2383.4    | 2186.025  | 197.375 | 1.090289452 | 0.4134  | -1.087 |
| 93749_at   | 1342.2  | 1518.8  | 1114.3  | 1076    | 1408.6  | 1599.2  | 1334.5  | 1304.3  | 0.279235029 | 1262.825  | 1411.65   | 148.825 | 0.894573726 | 0.2505  | 1.125  |
| 93750_at   | 2403.8  | 2543.4  | 2759.6  | 2721.4  | 2277.9  | 2283.1  | 3139.9  | 2873.3  | 0.882758167 | 2607.05   | 2643.55   | 36.5    | 0.986192809 | 0.9528  | -1.005 |
| 93751_at   | 703.9   | 779.8   | 969.9   | 862.2   | 668     | 635.7   | 712.3   | 737.5   | 0.085059221 | 828.95    | 688.375   | 140.575 | 1.20421282  | 0.05565 | -1.198 |
| 93752_at   | 1269    | 1077.8  | 1293.3  | 1261.8  | 1229.8  | 1297.2  | 1398.9  | 1357.6  | 0.178052227 | 1225.475  | 1320.875  | 95.4    | 0.927775149 | 0.1833  | 1.079  |
| 93753_at   | 866.7   | 898.9   | 965.1   | 1072.2  | 894     | 778.1   | 1080.7  | 1131.9  | 0.836756319 | 950.725   | 971.175   | 20.45   | 0.978943033 | 0.8955  | 1.014  |
| 93754_at   | 5166.7  | 5866.3  | 3811.8  | 3272.5  | 4679.3  | 4671    | 3604.5  | 3545.7  | 0.57881654  | 4529.325  | 4125.125  | 404.2   | 1.09798491  | 0.643   | -1.079 |
| 93755_at   | 15.1    | 13.5    | 10.5    | 11.5    | 18.1    | 17.6    | 9.4     | 15.7    | 0.313997387 | 12.65     | 15.2      | 2.55    | 0.832236842 | 0.3908  | 1.175  |
| 93757_at   | 2450    | 2093.1  | 2441.2  | 2334.8  | 2058.6  | 2266.6  | 2338    | 2407.2  | 0.599659279 | 2329.775  | 2267.6    | 62.175  | 1.027418857 | 0.6119  | -1.027 |
| 93758_at   | 462.4   | 345.3   | 506.8   | 610.4   | 340.7   | 335.8   | 478.1   | 534.1   | 0.45626604  | 481.225   | 422.175   | 59.05   | 1.139870907 | 0.4633  | -1.14  |
| 93760_at   | 2765.1  | 2880.5  | 2467.8  | 2372.4  | 2910.5  | 2950.6  | 2770.5  | 2401.7  | 0.460005426 | 2621.45   | 2758.325  | 136.875 | 0.950377494 | 0.4689  | 1.052  |
| 93761_at   | 36.3    | 25.8    | 37.8    | 58.2    | 45      | 43.8    | 73.5    | 64.9    | 0.135612647 | 39.525    | 56.8      | 17.275  | 0.695862676 | 0.1225  | 1.462  |
| 93762_at   | 2054.4  | 1693.7  | 1974.2  | 1922.9  | 1678.7  | 1674.2  | 1432.6  | 1544.5  | 0.016500631 | 1911.3    | 1582.5    | 328.8   | 1.207772512 | 0.0155  | -1.207 |
| 93764_at   | 1571.7  | 2171    | 1667.7  | 1282.2  | 2119.3  | 1280.4  | 1812.3  | 1532.9  | 0.961322057 | 1673.15   | 1686.225  | 13.075  | 0.992245993 | 0.9594  | 1.008  |
| 93765_at   | 26.9    | 2.6     | 2.2     | 3.4     | 11.8    | 4.5     | 2       | 2.5     | 0.610577095 | 8.775     | 5.2       | 3.575   | 1.6875      | 0.8146  | -1.189 |
| 93766_at   | 18.1    | 33.6    | 50.9    | 67.7    | 80.4    | 77      | 76.2    | 46.7    | 0.088217755 | 42.575    | 70.075    | 27.5    | 0.607563325 | 0.1097  | 1.8    |
| 93767_i_at | 2460.8  | 2186.3  | 2988.9  | 2902.8  | 2336.5  | 2262.7  | 1948.2  | 2390    | 0.125387524 | 2634.7    | 2234.35   | 400.35  | 1.179179627 | 0.1142  | -1.173 |
| 93768_f_at | 1377.5  | 1601.7  | 1989    | 2242.4  | 1758.1  | 1417.5  | 1774.2  | 2094.3  | 0.867381457 | 1802.65   | 1761.025  | 41.625  | 1.023636802 | 0.914   | -1.015 |
| 93769_at   | 515     | 433.9   | 444.4   | 511.7   | 462.6   | 345.6   | 480.6   | 446.6   | 0.30119663  | 476.25    | 433.85    | 42.4    | 1.09772963  | 0.3044  | -1.103 |
| 93770_at   | 7.3     | 6.4     | 4.4     | 6.9     | 3.7     | 14.1    | 7.2     | 3.6     | 0.74446843  | 6.25      | 7.15      | 0.9     | 0.874125874 | 0.9817  | 1.008  |
| 93771_at   | 39.6    | 32.9    | 27.2    | 29.2    | 27.5    | 47      | 24.6    | 23.1    | 0.799076003 | 32.225    | 30.55     | 1.675   | 1.054828151 | 0.6544  | -1.089 |
| 93772_i_at | 1389.4  | 1428.2  | 1829    | 1723.2  | 1681.1  | 1657.9  | 1974    | 1509.3  | 0.467301269 | 1592.45   | 1705.575  | 113.125 | 0.933673395 | 0.4516  | 1.073  |
| 93773_f_at | 1640.7  | 1882.1  | 2201    | 2325.4  | 2337.7  | 1929.4  | 2486.5  | 2241.2  | 0.273537845 | 2012.3    | 2248.7    | 236.4   | 0.894872593 | 0.271   | 1.123  |
| 93774_at   | 608.2   | 576.8   | 446.9   | 473.9   | 543.7   | 545.8   | 419.5   | 512.1   | 0.681895002 | 526.45    | 505.275   | 21.175  | 1.041907872 | 0.7067  | -1.039 |
| 93775_at   | 2867.9  | 2744.5  | 2330.9  | 2345.1  | 3038.8  | 3326.2  | 2823.5  | 2650.2  | 0.101421597 | 2572.1    | 2959.675  | 387.575 | 0.869048122 | 0.0993  | 1.151  |
| 93776_at   | 263.4   | 256.5   | 241.5   | 246.4   | 274.5   | 284.6   | 365.5   | 326.2   | 0.058257146 | 251.95    | 312.7     | 60.75   | 0.805724336 | 0.0222  | 1.234  |
| 93777_at   | 412     | 433.7   | 403.6   | 350.5   | 444.7   | 457.3   | 448.1   | 432.5   | 0.076769726 | 399.95    | 445.65    | 45.7    | 0.897453158 | 0.05587 | 1.117  |



|            |         |        |        |        |        |        |        |        |             |          |          |             |             |         |        |
|------------|---------|--------|--------|--------|--------|--------|--------|--------|-------------|----------|----------|-------------|-------------|---------|--------|
| 93778_at   | 383.1   | 314.1  | 391.3  | 367.6  | 289.4  | 523    | 315.9  | 376.1  | 0.838008085 | 364.025  | 376.1    | 12.075      | 0.967894177 | 0.9477  | 1.01   |
| 93779_at   | 21.6    | 12.3   | 15.3   | 17.9   | 19.4   | 19     | 24     | 19.2   | 0.178076328 | 16.775   | 20.4     | 3.625       | 0.822303922 | 0.16    | 1.236  |
| 93780_at   | 608.5   | 684.6  | 470    | 452.6  | 655.5  | 575.1  | 389.9  | 499.2  | 0.772760351 | 553.925  | 529.925  | 24          | 1.045289428 | 0.7634  | -1.048 |
| 93781_at   | 894.9   | 899.1  | 533    | 543    | 515.2  | 261.4  | 289.3  | 341    | 0.02973782  | 717.5    | 351.725  | 365.775     | 2.039945981 | 0.01434 | -2.046 |
| 93782_at   | 3574.3  | 3693.3 | 3294.7 | 2897.5 | 3590.9 | 3530.5 | 3733   | 3132.2 | 0.571038757 | 3364.95  | 3496.65  | 131.7       | 0.962335378 | 0.561   | 1.041  |
| 93783_at   | 172.4   | 160.8  | 127    | 156.7  | 171.2  | 249.7  | 115.5  | 187.3  | 0.416517245 | 154.225  | 180.925  | 26.7        | 0.852425038 | 0.4824  | 1.138  |
| 93784_at   | 1779.9  | 2015.6 | 1642.9 | 1831.4 | 2197   | 1763.1 | 1906.8 | 2676.3 | 0.216591009 | 1817.45  | 2135.8   | 318.35      | 0.850945781 | 0.1843  | 1.163  |
| 93785_at   | 2140.1  | 2274.6 | 1298   | 1241.2 | 1260.8 | 1166.4 | 938.2  | 831.7  | 0.079893549 | 1738.475 | 1049.275 | 689.2       | 1.656834481 | 0.04227 | -1.617 |
| 93786_i_at | 960.2   | 1154.2 | 1501.2 | 1311.7 | 1070.7 | 1048   | 1618.5 | 1250.6 | 0.933984381 | 1231.825 | 1246.95  | 15.125      | 0.987870404 | 0.9447  | 1.01   |
| 93787_f_at | 4750.5  | 4477.4 | 4097.3 | 3218.1 | 3886.2 | 4417   | 3471.4 | 3127.4 | 0.382496396 | 4135.825 | 3725.5   | 410.325     | 1.110139579 | 0.4019  | -1.108 |
| 93788_at   | 114.7   | 80.8   | 69.4   | 139.8  | 118.5  | 153.9  | 114    | 115    | 0.253875793 | 101.175  | 125.35   | 24.175      | 0.807140008 | 0.2121  | 1.277  |
| 93789_s_at | 10321.5 | 10005  | 7292.3 | 6651.9 | 8046.7 | 8135.8 | 5959.8 | 6257.7 | 0.238253223 | 8567.675 | 7100     | 1467.675    | 1.206714789 | 0.24    | -1.197 |
| 93790_at   | 214.9   | 143.5  | 181.4  | 144.8  | 121.8  | 232.6  | 215.1  | 201.8  | 0.498069011 | 171.15   | 192.825  | 21.675      | 0.887592377 | 0.5738  | 1.11   |
| 93793_at   | 924.5   | 898.3  | 1367.6 | 1522.4 | 887.8  | 913.6  | 1188.5 | 1242.4 | 0.539627785 | 1178.2   | 1058.075 | 120.125     | 1.113531649 | 0.5878  | -1.096 |
| 93794_at   | 1458.2  | 1442.3 | 1607.3 | 1689.3 | 2018.6 | 1681.1 | 1541.4 | 1831.9 | 0.125962252 | 1549.275 | 1768.25  | 218.975     | 0.876162873 | 0.1114  | 1.138  |
| 93795_at   | 869.3   | 941.8  | 740.2  | 752.4  | 773    | 863.4  | 681.3  | 640.7  | 0.259558369 | 825.925  | 739.6    | 86.325      | 1.116718496 | 0.2517  | -1.118 |
| 93796_at   | 59.9    | 27.6   | 27.7   | 30.5   | 23.3   | 56.5   | 28.8   | 18     | 0.695642033 | 36.425   | 31.65    | 4.775       | 1.150868878 | 0.5816  | -1.196 |
| 93797_g_at | 1437.6  | 1268.2 | 2230.8 | 1925.6 | 969.9  | 1007.5 | 1408.6 | 1643.6 | 0.150529763 | 1715.55  | 1257.4   | 458.15      | 1.364362971 | 0.1404  | -1.364 |
| 93798_at   | 2703.1  | 2255   | 2834.9 | 2933.8 | 2269.4 | 2334.9 | 2200.7 | 2543.6 | 0.10222431  | 2681.7   | 2337.15  | 344.55      | 1.147423144 | 0.08998 | -1.143 |
| 93799_at   | 477.9   | 368.5  | 471    | 397.9  | 421.9  | 441.6  | 326.5  | 338.3  | 0.283810027 | 428.825  | 382.075  | 46.75       | 1.122358176 | 0.2807  | -1.125 |
| 93800_f_at | 78.7    | 142.3  | 92.5   | 114.8  | 231.4  | 187.4  | 108.9  | 144.4  | 0.103317785 | 107.075  | 168.025  | 60.95       | 0.637256361 | 0.08063 | 1.547  |
| 93801_at   | 8.7     | 43.7   | 7.8    | 35.8   | 74.9   | 42     | 7.1    | 11.8   | 0.608845422 | 24       | 33.95    | 9.95        | 0.706921944 | 0.7596  | 1.256  |
| 93802_at   | 63.5    | 80.4   | 101.7  | 130.3  | 83.7   | 51.2   | 111.9  | 129.1  | 1           | 93.975   | 93.975   | 1.42109E-14 | 1           | 0.9342  | 1.022  |
| 93803_at   | 514.1   | 400.5  | 870.1  | 520    | 518.8  | 465.6  | 439.2  | 416.7  | 0.339757307 | 576.175  | 460.075  | 116.1       | 1.25235016  | 0.314   | -1.205 |
| 93804_at   | 135     | 170.1  | 211    | 193.3  | 226.3  | 212.4  | 169.4  | 250.2  | 0.165884857 | 177.35   | 214.575  | 37.225      | 0.826517535 | 0.1785  | 1.214  |
| 93805_at   | 2114.4  | 2377.9 | 1742.4 | 1698.8 | 1879   | 1750.4 | 1618.6 | 1394   | 0.151439225 | 1983.375 | 1660.5   | 322.875     | 1.194444444 | 0.1411  | -1.19  |
| 93806_at   | 2788.6  | 3975.7 | 3424.9 | 2937.6 | 3759.2 | 3242.9 | 4133.4 | 3521.9 | 0.29236446  | 3281.7   | 3664.35  | 382.65      | 0.895574931 | 0.2681  | 1.123  |
| 93807_at   | 27.6    | 24.7   | 9.8    | 8.5    | 12.7   | 10.2   | 11.1   | 21.3   | 0.525869199 | 17.65    | 13.825   | 3.825       | 1.276672694 | 0.6786  | -1.163 |
| 93808_at   | 89.3    | 58     | 55     | 37.7   | 18.7   | 68.1   | 33     | 42.7   | 0.242705171 | 60       | 40.625   | 19.375      | 1.476923077 | 0.2143  | -1.565 |
| 93809_at   | 1136.1  | 1108.2 | 1145.8 | 1099.7 | 1043.6 | 1172.3 | 951.2  | 996.5  | 0.185444185 | 1122.45  | 1040.9   | 81.55       | 1.078345662 | 0.1388  | -1.081 |
| 93810_at   | 3955.6  | 3634.9 | 3104.6 | 2961.2 | 3884.5 | 4504.7 | 3317.9 | 2430   | 0.819717961 | 3414.075 | 3534.275 | 120.2       | 0.965990196 | 0.9162  | 1.016  |
| 93812_at   | 1636.9  | 1555.6 | 1345   | 892.3  | 1676.4 | 1552.9 | 1208.8 | 1232.8 | 0.778199642 | 1357.45  | 1417.725 | 60.275      | 0.957484703 | 0.7225  | 1.061  |
| 93815_at   | 2252    | 2633   | 2052.8 | 1786.5 | 2487.5 | 2177.5 | 1707.6 | 1601.2 | 0.518253244 | 2181.075 | 1993.45  | 187.625     | 1.094120745 | 0.4925  | -1.101 |
| 93817_at   | 108.7   | 61.6   | 88.9   | 92     | 67.7   | 109.6  | 150.7  | 93.5   | 0.420899726 | 87.8     | 105.375  | 17.575      | 0.833214709 | 0.4613  | 1.175  |
| 93818_g_at | 1941.4  | 1670.6 | 2126.2 | 2273.6 | 1777.1 | 1741.8 | 2282.9 | 2362.4 | 0.861583798 | 2002.95  | 2041.05  | 38.1        | 0.981333137 | 0.8857  | 1.016  |
| 93819_at   | 4144.4  | 3462.7 | 3904   | 3494.7 | 3485.8 | 3744.5 | 3662.1 | 3773   | 0.65686856  | 3751.45  | 3666.35  | 85.1        | 1.023211096 | 0.6786  | 1.021  |
| 93820_at   | 5677.9  | 6817.8 | 4905   | 5294.9 | 5965.8 | 5524.4 | 5147.8 | 5501.8 | 0.770768505 | 5673.9   | 5534.95  | 138.95      | 1.025104111 | 0.8164  | -1.019 |
| 93821_at   | 311.7   | 376.2  | 339.9  | 528.6  | 378.9  | 297.7  | 363.6  | 436.5  | 0.737470509 | 389.1    | 369.175  | 19.925      | 1.053971694 | 0.7809  | -1.042 |
| 93822_at   | 5269.3  | 6261.5 | 4177.1 | 4404.2 | 5668.4 | 5505   | 4400.8 | 4083   | 0.859979287 | 5028.025 | 4914.3   | 113.725     | 1.023141648 | 0.877   | -1.02  |
| 93823_at   | 776.1   | 774.3  | 1031.2 | 975.2  | 1105   | 843.9  | 1100.9 | 934.8  | 0.29297039  | 889.2    | 996.15   | 106.95      | 0.892636651 | 0.2917  | 1.123  |
| 93824_at   | 76      | 83.5   | 120    | 118.4  | 159.1  | 163.6  | 59.8   | 120.2  | 0.377215146 | 99.475   | 125.675  | 26.2        | 0.791525761 | 0.5118  | 1.201  |
| 93826_at   | 426.7   | 739.7  | 955.6  | 954.4  | 827.7  | 545.8  | 747.4  | 778.3  | 0.765209281 | 769.1    | 724.8    | 44.3        | 1.061120309 | 0.9178  | -1.023 |
| 93827_at   | 58.7    | 58.6   | 36.8   | 64.8   | 41.3   | 68.8   | 36.9   | 40.6   | 0.44678451  | 54.725   | 46.9     | 7.825       | 1.16684435  | 0.4198  | -1.178 |
| 93829_at   | 835.2   | 1191.7 | 1494.6 | 1518.5 | 1545.6 | 1034.4 | 1490.8 | 1295.2 | 0.695346956 | 1260     | 1341.5   | 81.5        | 0.939247111 | 0.6557  | 1.081  |
| 93830_at   | 5330    | 5378.2 | 4800.9 | 5189   | 5098.3 | 5379   | 6119.6 | 5829.8 | 0.163610847 | 5174.525 | 5606.675 | 432.15      | 0.922922231 | 0.1538  | 1.082  |
| 93831_at   | 886     | 702.3  | 797    | 782    | 676.4  | 760    | 1100.1 | 803.9  | 0.68647601  | 791.825  | 835.1    | 43.275      | 0.948179859 | 0.74    | 1.041  |
| 93832_at   | 910.2   | 426.7  | 767.7  | 792.8  | 788    | 855.4  | 806.8  | 790.5  | 0.471724978 | 724.35   | 810.175  | 85.825      | 0.894066097 | 0.4102  | 1.161  |
| 93833_s_at | 528.5   | 633.5  | 565.2  | 780.8  | 679.4  | 663.4  | 1010.3 | 802.1  | 0.154164493 | 627      | 788.8    | 161.8       | 0.794878296 | 0.1307  | 1.254  |
| 93834_at   | 181.4   | 107    | 106.2  | 168.4  | 94.2   | 199.6  | 159    | 154.7  | 0.718771884 | 140.75   | 151.875  | 11.125      | 0.926748971 | 0.7489  | 1.074  |
| 93835_at   | 754.8   | 612.9  | 567.1  | 495.7  | 595.9  | 652.3  | 641.5  | 623.8  | 0.733636682 | 607.625  | 628.375  | 20.75       | 0.966978317 | 0.637   | 1.046  |
| 93836_at   | 290.5   | 274.5  | 329.7  | 316    | 312    | 437.1  | 313.4  | 343.6  | 0.200439836 | 302.675  | 351.525  | 48.85       | 0.861034066 | 0.1616  | 1.153  |
| 93837_at   | 124.8   | 102.5  | 111.1  | 95.5   | 111.9  | 52.3   | 138.3  | 157.1  | 0.801628377 | 108.475  | 114.9    | 6.425       | 0.94408181  | 0.9503  | 1.017  |
| 93838_at   | 2146.4  | 2019.1 | 1998.6 | 1597.9 | 2017.4 | 1908.9 | 1694.8 | 1829.4 | 0.595013317 | 1940.5   | 1862.625 | 77.875      | 1.041809275 | 0.6371  | -1.038 |
| 93839_at   | 886.6   | 1075.9 | 1154.3 | 956.9  | 1145.8 | 993.8  | 1191.3 | 1121.6 | 0.248704695 | 1018.425 | 1113.125 | 94.7        | 0.9149242   | 0.2416  | 1.096  |
| 93840_at   | 44      | 56.7   | 24.5   | 16.9   | 24.4   | 44.2   | 17     | 28.1   | 0.537439333 | 35.525   | 28.425   | 7.1         | 1.249780123 | 0.6275  | -1.189 |
| 93841_at   | 606.6   | 919.1  | 535.1  | 732.7  | 906.5  | 586.5  | 650.2  | 997.2  | 0.529668345 | 698.375  | 785.1    | 86.725      | 0.889536365 | 0.5367  | 1.121  |



|            |        |        |        |        |        |        |        |        |             |          |          |         |             |         |        |
|------------|--------|--------|--------|--------|--------|--------|--------|--------|-------------|----------|----------|---------|-------------|---------|--------|
| 93842_at   | 1901.6 | 1936.9 | 1970.1 | 1694.5 | 1819.1 | 1664.4 | 2066.4 | 2095.2 | 0.779858132 | 1875.775 | 1911.275 | 35.5    | 0.981426011 | 0.8124  | 1.016  |
| 93843_at   | 1517   | 1667.2 | 1575.9 | 1287.9 | 1661   | 1687.3 | 1767.3 | 1606.7 | 0.126292192 | 1512     | 1680.575 | 168.575 | 0.89969207  | 0.112   | 1.116  |
| 93844_at   | 6014.7 | 6853.4 | 4388.4 | 3872.3 | 6026.4 | 5418.9 | 4649.7 | 4514.4 | 0.874955505 | 5282.2   | 5152.35  | 129.85  | 1.025202092 | 0.9722  | 1.005  |
| 93845_at   | 883.1  | 1026.6 | 903.6  | 706.4  | 1081.7 | 818.7  | 658.8  | 693.4  | 0.589510137 | 879.925  | 813.15   | 66.775  | 1.08211892  | 0.5348  | -1.094 |
| 93846_at   | 10.6   | 32.3   | 35     | 8.2    | 7.1    | 17.3   | 45.4   | 9      | 0.877328529 | 21.525   | 19.7     | 1.825   | 1.092639594 | 0.771   | -1.186 |
| 93847_at   | 34.6   | 21     | 12.4   | 12     | 9.6    | 46.3   | 12.7   | 36.1   | 0.578868355 | 20       | 26.175   | 6.175   | 0.76408787  | 0.7448  | 1.17   |
| 93848_at   | 12.3   | 6.8    | 13.6   | 26     | 10.4   | 12.8   | 15.8   | 21.2   | 0.939297293 | 14.675   | 15.05    | 0.375   | 0.975083056 | 0.7507  | 1.111  |
| 93849_at   | 84     | 82.3   | 94.2   | 83     | 82.1   | 83     | 129.9  | 76.3   | 0.620566882 | 85.875   | 92.825   | 6.95    | 0.925127929 | 0.6722  | 1.057  |
| 93850_at   | 82.4   | 44.3   | 50.4   | 45.5   | 14.8   | 45.3   | 100.1  | 63.7   | 0.987728023 | 55.65    | 55.975   | 0.325   | 0.994193837 | 0.7108  | -1.183 |
| 93851_at   | 221.9  | 230.4  | 278.9  | 247.8  | 227.9  | 175.2  | 170.2  | 160.7  | 0.021610025 | 244.75   | 183.5    | 61.25   | 1.333787466 | 0.01918 | -1.341 |
| 93852_at   | 905.7  | 827.3  | 992    | 1228.9 | 752.8  | 691.3  | 1253.5 | 1147.6 | 0.875703618 | 988.475  | 961.3    | 27.175  | 1.028269011 | 0.7814  | -1.051 |
| 93853_at   | 283.8  | 307.1  | 305.4  | 354.8  | 232.8  | 253.2  | 605    | 472.3  | 0.450537754 | 312.775  | 390.825  | 78.05   | 0.800294249 | 0.5666  | 1.156  |
| 93855_at   | 133.9  | 148.3  | 117.6  | 168.8  | 118.2  | 130.1  | 133.2  | 159.7  | 0.641805431 | 142.15   | 135.3    | 6.85    | 1.050628234 | 0.6541  | -1.048 |
| 93856_at   | 441.6  | 422.9  | 700.7  | 1112.5 | 593.1  | 463.3  | 932    | 873.3  | 0.823033114 | 669.425  | 715.425  | 46      | 0.935702554 | 0.7152  | 1.113  |
| 93857_at   | 93.6   | 95.5   | 148.4  | 150.5  | 51.1   | 130.4  | 186.9  | 99.7   | 0.884917057 | 122      | 117.025  | 4.975   | 1.042512284 | 0.7096  | -1.126 |
| 93858_at   | 6.2    | 6.2    | 18.6   | 2.7    | 7.2    | 64.1   | 5.3    | 18.5   | 0.350332982 | 8.425    | 23.775   | 15.35   | 0.354363828 | 0.2914  | 2.215  |
| 93859_at   | 587.1  | 778.9  | 694.1  | 725.7  | 887.7  | 695.2  | 785.1  | 843    | 0.116444784 | 696.45   | 802.75   | 106.3   | 0.867580193 | 0.1239  | 1.154  |
| 93860_i_at | 304.1  | 269.7  | 400.3  | 246.5  | 198    | 434.6  | 261.3  | 288.5  | 0.880313898 | 305.15   | 295.6    | 9.55    | 1.032307172 | 0.7849  | -1.057 |
| 93861_f_at | 367.6  | 288    | 508.3  | 428.2  | 242.3  | 447.4  | 409.5  | 401.6  | 0.737854747 | 398.025  | 375.2    | 22.825  | 1.060834222 | 0.7389  | -1.066 |
| 93862_i_at | 20     | 20.2   | 14.4   | 9.9    | 10.9   | 24.4   | 20.7   | 10.6   | 0.906732634 | 16.125   | 16.65    | 0.525   | 0.968468468 | 0.988   | 1.004  |
| 93863_f_at | 67.2   | 10.5   | 39.3   | 25.2   | 45.5   | 73     | 39.8   | 39.9   | 0.375576537 | 35.55    | 49.55    | 14      | 0.717457114 | 0.2718  | 1.66   |
| 93864_s_at | 7.6    | 30.6   | 41.3   | 31.5   | 19.4   | 35.3   | 37.2   | 27.2   | 0.815757251 | 27.75    | 29.775   | 2.025   | 0.931989924 | 0.63    | 1.232  |
| 93865_s_at | 512.5  | 600.2  | 431.7  | 426.6  | 645.1  | 575.8  | 409.7  | 582.5  | 0.388040811 | 492.75   | 553.275  | 60.525  | 0.890605937 | 0.4144  | 1.118  |
| 93866_s_at | 2679.3 | 3038.8 | 1631.4 | 1990.3 | 2241.7 | 2137.7 | 1660.6 | 1917.6 | 0.373674868 | 2334.95  | 1989.4   | 345.55  | 1.173695587 | 0.4124  | -1.147 |
| 93867_at   | 52.1   | 87.6   | 80.3   | 62.1   | 72.1   | 82.5   | 62.4   | 76     | 0.779659068 | 70.525   | 73.25    | 2.725   | 0.962798635 | 0.6999  | 1.055  |
| 93868_at   | 377    | 334.9  | 539.3  | 371.7  | 497.3  | 486.1  | 579.2  | 420    | 0.164501435 | 405.725  | 495.65   | 89.925  | 0.818571573 | 0.1374  | 1.235  |
| 93869_s_at | 114.2  | 102.8  | 90.1   | 86.9   | 50.9   | 120.8  | 129.5  | 75.1   | 0.834346839 | 98.5     | 94.075   | 4.425   | 1.047036939 | 0.6533  | -1.113 |
| 93870_at   | 30.9   | 26.4   | 49.2   | 61.2   | 37.2   | 47.8   | 60.1   | 55.3   | 0.429443451 | 41.925   | 50.1     | 8.175   | 0.836826347 | 0.3618  | 1.246  |
| 93871_at   | 20.5   | 12.6   | 39.1   | 13.6   | 42.5   | 69.1   | 69.7   | 33.3   | 0.032540948 | 21.45    | 53.65    | 32.2    | 0.399813607 | 0.02199 | 2.657  |
| 93872_at   | 105.1  | 73.6   | 80.3   | 119.2  | 28.7   | 67.9   | 43.6   | 41     | 0.011775739 | 94.55    | 45.3     | 49.25   | 2.087196468 | 0.01083 | -2.146 |
| 93873_s_at | 8.7    | 8.3    | 4.4    | 11.6   | 9.5    | 14.5   | 10.7   | 6.8    | 0.36710057  | 8.25     | 10.375   | 2.125   | 0.795180723 | 0.367   | 1.283  |
| 93874_s_at | 1069.4 | 1278.2 | 1343.9 | 1000.7 | 1588   | 1360.2 | 1217   | 1349.6 | 0.117469651 | 1173.05  | 1378.7   | 205.65  | 0.850837746 | 0.115   | 1.179  |
| 93875_at   | 765    | 610.6  | 835.4  | 1122.6 | 549.8  | 492.1  | 724.9  | 766.8  | 0.173696615 | 833.4    | 633.4    | 200     | 1.315756236 | 0.157   | -1.306 |
| 93877_at   | 732.6  | 597.5  | 774.5  | 785.2  | 797.3  | 599.7  | 863.1  | 912.2  | 0.423117433 | 722.45   | 793.075  | 70.625  | 0.910947893 | 0.471   | 1.09   |
| 93878_at   | 103.7  | 142.2  | 137.4  | 139.8  | 80.1   | 181.2  | 120.7  | 148    | 0.944376572 | 130.775  | 132.5    | 1.725   | 0.986981132 | 0.9107  | -1.022 |
| 93879_f_at | 23.5   | 31     | 18.1   | 19.9   | 22     | 34.6   | 63.6   | 22.7   | 0.290554765 | 23.125   | 35.725   | 12.6    | 0.647305808 | 0.2391  | 1.431  |
| 93880_at   | 13.6   | 8.3    | 14.1   | 6      | 17.7   | 19.7   | 5.6    | 5      | 0.747073712 | 10.5     | 12       | 1.5     | 0.875       | 0.9939  | 1.003  |
| 93881_i_at | 49.9   | 88.4   | 122.3  | 110.4  | 47.5   | 93.3   | 149    | 79     | 0.984177043 | 92.75    | 92.2     | 0.55    | 1.005965293 | 0.9179  | 1.034  |
| 93882_f_at | 210.7  | 158.4  | 237.7  | 205.7  | 109.6  | 224.6  | 356.9  | 266.6  | 0.541321248 | 203.125  | 239.425  | 36.3    | 0.84838676  | 0.7449  | 1.095  |
| 93883_at   | 128.5  | 212.2  | 225.4  | 201.4  | 126.8  | 235.4  | 131.8  | 102.5  | 0.290610422 | 191.875  | 149.125  | 42.75   | 1.286672255 | 0.2481  | -1.324 |
| 93884_at   | 33.2   | 37.7   | 48.3   | 38.7   | 33.6   | 66.6   | 29     | 38.5   | 0.800082802 | 39.475   | 41.925   | 2.45    | 0.941562314 | 0.9367  | 1.016  |
| 93885_g_at | 188    | 308    | 276.1  | 221.5  | 275.6  | 360.6  | 244.7  | 248.5  | 0.407247803 | 248.4    | 282.35   | 33.95   | 0.879759164 | 0.3842  | 1.143  |
| 93886_at   | 233.2  | 90     | 207.4  | 192.1  | 98.4   | 227.2  | 130    | 154.7  | 0.525711329 | 180.675  | 152.575  | 28.1    | 1.184171719 | 0.5964  | -1.168 |
| 93887_at   | 398.5  | 296.3  | 457.7  | 510.4  | 417.2  | 272    | 561    | 532.2  | 0.723541449 | 415.725  | 445.6    | 29.875  | 0.932955566 | 0.8081  | 1.053  |
| 93888_at   | 115.7  | 69.2   | 68.3   | 83.7   | 115.9  | 207.2  | 120.6  | 114.7  | 0.086696862 | 84.225   | 139.6    | 55.375  | 0.603330946 | 0.03921 | 1.641  |
| 93889_f_at | 84.1   | 104.7  | 69.3   | 87.1   | 82.6   | 55.9   | 114.6  | 77.8   | 0.81039592  | 86.3     | 82.725   | 3.575   | 1.043215473 | 0.7207  | -1.066 |
| 93890_at   | 10.9   | 10.3   | 6.6    | 9.6    | 8.1    | 27.2   | 11.3   | 11.7   | 0.312533413 | 9.35     | 14.575   | 5.225   | 0.641509434 | 0.2549  | 1.426  |
| 93891_at   | 29.2   | 7.1    | 18.8   | 8.7    | 17.1   | 9.7    | 11.8   | 5.8    | 0.435660039 | 15.95    | 11.1     | 4.85    | 1.436936937 | 0.5159  | -1.318 |
| 93892_at   | 331.2  | 265.9  | 312.9  | 286    | 209.4  | 287.8  | 286.3  | 233.2  | 0.119305153 | 299      | 254.175  | 44.825  | 1.176354874 | 0.1189  | -1.183 |
| 93893_f_at | 37.8   | 25.1   | 16.1   | 27     | 25.9   | 67.2   | 25.5   | 14.7   | 0.61262318  | 26.5     | 33.325   | 6.825   | 0.7951988   | 0.7594  | 1.123  |
| 93894_f_at | 6.1    | 3.2    | 15     | 17.1   | 11.1   | 17.5   | 4.2    | 22.1   | 0.537098137 | 10.35    | 13.725   | 3.375   | 0.754098361 | 0.5739  | 1.375  |
| 93895_s_at | 338.6  | 411    | 471.7  | 439.4  | 318.7  | 331.7  | 589    | 473.3  | 0.861490673 | 415.175  | 428.175  | 13      | 0.969638582 | 0.975   | 1.005  |
| 93896_at   | 423.7  | 342    | 324.3  | 336.5  | 431.7  | 277    | 377.9  | 295.6  | 0.805369591 | 356.625  | 345.55   | 11.075  | 1.032050355 | 0.7375  | -1.043 |
| 93897_at   | 8.6    | 6.6    | 17.9   | 5.8    | 4.2    | 43.9   | 6.9    | 13.4   | 0.488318219 | 9.725    | 17.1     | 7.375   | 0.56871345  | 0.6614  | 1.298  |
| 93898_at   | 215.5  | 140.3  | 159.3  | 185.2  | 180    | 162.3  | 215.1  | 197.4  | 0.521570215 | 175.075  | 188.7    | 13.625  | 0.927795443 | 0.4854  | 1.086  |
| 93899_at   | 217    | 167.6  | 249.2  | 257.8  | 99.3   | 197.7  | 282.7  | 255.8  | 0.771617517 | 222.9    | 208.875  | 14.025  | 1.067145422 | 0.6428  | -1.133 |



|            |        |        |        |        |        |        |        |        |             |          |          |         |             |         |        |
|------------|--------|--------|--------|--------|--------|--------|--------|--------|-------------|----------|----------|---------|-------------|---------|--------|
| 93900_at   | 106.8  | 78.4   | 119.8  | 123.3  | 69.1   | 126.9  | 128.3  | 110.7  | 0.925702235 | 107.075  | 108.75   | 1.675   | 0.984597701 | 0.9912  | 1.002  |
| 93901_at   | 226    | 190.9  | 231.7  | 245.9  | 202.8  | 233.6  | 194.9  | 193.8  | 0.291943721 | 223.625  | 206.275  | 17.35   | 1.084111017 | 0.2983  | -1.082 |
| 93902_at   | 217.5  | 195.2  | 291.3  | 303.3  | 157.1  | 228.4  | 357.3  | 271.5  | 0.973235395 | 251.825  | 253.575  | 1.75    | 0.993098689 | 0.9302  | -1.019 |
| 93903_at   | 348.2  | 379.6  | 377.3  | 493.9  | 280.6  | 379.8  | 271.2  | 413.5  | 0.234488014 | 399.75   | 336.275  | 63.475  | 1.1887592   | 0.2156  | -1.198 |
| 93904_f_at | 43.3   | 60.9   | 35.5   | 34     | 40.8   | 17.2   | 66.1   | 44.3   | 0.914682134 | 43.425   | 42.1     | 1.325   | 1.031472684 | 0.7389  | -1.115 |
| 93905_at   | 3      | 7.8    | 2.7    | 9.4    | 9.7    | 3.8    | 1.3    | 10.5   | 0.838574863 | 5.725    | 6.325    | 0.6     | 0.90513834  | 0.9505  | -1.038 |
| 93906_s_at | 52.5   | 34.3   | 33.2   | 22.1   | 21     | 63.9   | 33.3   | 23.7   | 0.996745818 | 35.525   | 35.475   | 0.05    | 1.001409443 | 0.8581  | -1.059 |
| 93907_f_at | 4408.1 | 4360.3 | 4530.6 | 4261   | 4767.3 | 4254.1 | 4871.4 | 4568.7 | 0.199912821 | 4390     | 4615.375 | 225.375 | 0.951168648 | 0.1822  | 1.05   |
| 93908_f_at | 703.3  | 588.9  | 783.7  | 643.6  | 466    | 784.9  | 881.7  | 849.1  | 0.561968329 | 679.875  | 745.425  | 65.55   | 0.912063588 | 0.6884  | 1.07   |
| 93909_f_at | 2342.9 | 1784.7 | 2199.9 | 1963.8 | 1221.4 | 2412   | 2647.3 | 2150.7 | 0.922104024 | 2072.825 | 2107.85  | 35.025  | 0.983383542 | 0.9229  | 1.019  |
| 93910_at   | 170.6  | 137.4  | 131.9  | 86.9   | 165.9  | 158.7  | 176.4  | 172.5  | 0.120682238 | 131.7    | 168.375  | 36.675  | 0.782182628 | 0.1044  | 1.314  |
| 93911_at   | 1019.6 | 717.8  | 1007   | 982.1  | 980.9  | 1315.9 | 1175.7 | 1018.1 | 0.119637284 | 931.625  | 1122.65  | 191.025 | 0.829844564 | 0.1293  | 1.209  |
| 93912_at   | 220.5  | 247.2  | 741.7  | 417.1  | 104.9  | 228    | 349.2  | 204    | 0.227136201 | 406.625  | 221.525  | 185.1   | 1.835571606 | 0.1754  | -1.773 |
| 93913_at   | 53.3   | 70.6   | 68.2   | 64.4   | 73.3   | 64.7   | 103.6  | 121.9  | 0.135371066 | 64.125   | 90.875   | 26.75   | 0.705639615 | 0.0917  | 1.379  |
| 93914_at   | 120.7  | 151.5  | 171    | 205    | 150.4  | 201    | 185.9  | 297.8  | 0.255616007 | 162.05   | 208.775  | 46.725  | 0.776194468 | 0.2332  | 1.271  |
| 93915_at   | 15     | 15.8   | 26.7   | 28.3   | 26.7   | 42.5   | 15.1   | 14.7   | 0.676723854 | 21.45    | 24.75    | 3.3     | 0.866666667 | 0.7886  | 1.089  |
| 93916_at   | 62.5   | 13.9   | 84.6   | 90.1   | 10.7   | 22.6   | 74.8   | 59.1   | 0.397192093 | 62.775   | 41.8     | 20.975  | 1.501794258 | 0.4936  | -1.58  |
| 93917_at   | 420.3  | 353.1  | 377    | 474.3  | 342.6  | 441.9  | 369.5  | 402.6  | 0.636990996 | 406.175  | 389.15   | 17.025  | 1.043749197 | 0.6458  | -1.042 |
| 93918_at   | 1312.9 | 1178.4 | 1185.9 | 1198.8 | 1136.7 | 1313.3 | 1205.9 | 1170.5 | 0.811286194 | 1219     | 1206.6   | 12.4    | 1.010276811 | 0.798   | -1.011 |
| 93919_at   | 129.9  | 169.2  | 184.2  | 450.6  | 50.1   | 136    | 622.8  | 403.8  | 0.662064897 | 233.475  | 303.175  | 69.7    | 0.770099777 | 0.9811  | -1.016 |
| 93920_at   | 31.4   | 65.8   | 53.1   | 62.2   | 47.4   | 24.4   | 88.9   | 18.6   | 0.662156682 | 53.125   | 44.825   | 8.3     | 1.185164529 | 0.4459  | -1.373 |
| 93921_at   | 493.4  | 516.5  | 831.8  | 663.1  | 342.7  | 585.3  | 500.2  | 451.8  | 0.152693777 | 626.2    | 470      | 156.2   | 1.332340426 | 0.1379  | -1.327 |
| 93922_g_at | 545.4  | 622.6  | 844.7  | 822.5  | 414.2  | 537    | 609.1  | 534    | 0.08327531  | 708.8    | 523.575  | 185.225 | 1.353769756 | 0.06971 | -1.344 |
| 93923_at   | 521.5  | 568.6  | 798.4  | 724.5  | 514.2  | 645.3  | 672.6  | 691    | 0.780176277 | 653.25   | 630.775  | 22.475  | 1.035630772 | 0.8328  | -1.027 |
| 93924_f_at | 2595.1 | 2088   | 1995.2 | 2409   | 2563.7 | 1949.4 | 1636.6 | 1799   | 0.296355197 | 2271.825 | 1987.175 | 284.65  | 1.143243549 | 0.2584  | -1.153 |
| 93925_at   | 61.5   | 77.7   | 74.8   | 73.6   | 38.9   | 100.6  | 88.5   | 62     | 0.968775423 | 71.9     | 72.5     | 0.6     | 0.991724138 | 0.8233  | -1.053 |
| 93926_at   | 20.4   | 24     | 10.7   | 13.1   | 8.2    | 14.3   | 13.7   | 14.3   | 0.262901944 | 17.05    | 12.625   | 4.425   | 1.35049505  | 0.2855  | -1.313 |
| 93927_f_at | 2.2    | 2.2    | 17.4   | 20.4   | 12.5   | 23.9   | 17     | 11.4   | 0.362977807 | 10.55    | 16.2     | 5.65    | 0.651234568 | 0.2215  | 2.406  |
| 93928_f_at | 25.1   | 53.1   | 13.7   | 34.8   | 20.5   | 43     | 8.1    | 32     | 0.625370316 | 31.675   | 25.9     | 5.775   | 1.222972973 | 0.5996  | -1.292 |
| 93929_s_at | 30.3   | 10.6   | 10.5   | 5.3    | 6      | 18     | 1.4    | 18.5   | 0.664430715 | 14.175   | 10.975   | 3.2     | 1.291571754 | 0.5343  | -1.596 |
| 93930_at   | 204.4  | 190.5  | 298.8  | 384    | 126.1  | 249.2  | 393.6  | 206.3  | 0.734566224 | 269.425  | 243.8    | 25.625  | 1.105106645 | 0.6437  | -1.15  |
| 93931_at   | 12.5   | 27     | 24.3   | 23.1   | 7.6    | 13.3   | 10.3   | 10.6   | 0.031618294 | 21.725   | 10.45    | 11.275  | 2.078947368 | 0.0142  | -2.038 |
| 93932_at   | 16.9   | 14.3   | 25.8   | 16.4   | 9.4    | 19.2   | 12.9   | 12     | 0.182866428 | 18.35    | 13.375   | 4.975   | 1.371962617 | 0.148   | -1.384 |
| 93933_at   | 87.8   | 77     | 82.3   | 75.6   | 72.9   | 133.2  | 72.9   | 93.4   | 0.449900118 | 80.675   | 93.1     | 12.425  | 0.866541353 | 0.4691  | 1.12   |
| 93934_at   | 10.1   | 6.9    | 13.6   | 10.5   | 10     | 15.5   | 10.7   | 10.3   | 0.501615447 | 10.275   | 11.625   | 1.35    | 0.883870968 | 0.4618  | 1.147  |
| 93935_at   | 110.4  | 108.9  | 155    | 204.3  | 127.8  | 118.4  | 152.4  | 158.4  | 0.836428252 | 144.65   | 139.25   | 5.4     | 1.038779174 | 0.9527  | 1.01   |
| 93936_at   | 238.8  | 227.8  | 369    | 338.4  | 270.5  | 249.3  | 463.8  | 424.5  | 0.404673052 | 293.5    | 352.025  | 58.525  | 0.833747603 | 0.4308  | 1.182  |
| 93937_at   | 270.8  | 266.6  | 340.4  | 344.6  | 449.1  | 397    | 357.8  | 433.8  | 0.012591828 | 305.6    | 409.425  | 103.825 | 0.746412652 | 0.01419 | 1.344  |
| 93938_at   | 72.4   | 48.7   | 57.8   | 72.7   | 81.5   | 85.6   | 76     | 76.5   | 0.055945077 | 62.9     | 79.9     | 17      | 0.787234043 | 0.04705 | 1.287  |
| 93939_at   | 126.5  | 154.7  | 170.4  | 203    | 85.9   | 155.9  | 138.1  | 144.2  | 0.1927162   | 163.65   | 131.025  | 32.625  | 1.248998283 | 0.2127  | -1.262 |
| 93940_at   | 150.2  | 203.8  | 141.7  | 126.5  | 188.6  | 181.2  | 198.1  | 147.4  | 0.297678955 | 155.55   | 178.825  | 23.275  | 0.869844482 | 0.2623  | 1.161  |
| 93941_at   | 15.4   | 80     | 13.5   | 80     | 89.4   | 67.8   | 9.1    | 19.6   | 0.978700309 | 47.225   | 46.475   | 0.75    | 1.016137708 | 0.9474  | -1.052 |
| 93942_at   | 62.7   | 47.9   | 85     | 104.1  | 65.8   | 14.8   | 101.7  | 116    | 0.98970413  | 74.925   | 74.575   | 0.35    | 1.004693262 | 0.6911  | -1.233 |
| 93943_f_at | 8.1    | 12.5   | 41.8   | 18.1   | 5      | 8.6    | 23.6   | 6.6    | 0.339292499 | 20.125   | 10.95    | 9.175   | 1.837899543 | 0.2532  | -1.848 |
| 93944_r_at | 323.5  | 295    | 336    | 311.7  | 199.8  | 350.8  | 290.3  | 270.1  | 0.30558968  | 316.55   | 277.75   | 38.8    | 1.139693969 | 0.26    | -1.161 |
| 93945_at   | 37.4   | 28.1   | 38.9   | 78.1   | 8.1    | 21     | 84.3   | 25.9   | 0.6154365   | 45.625   | 34.825   | 10.8    | 1.310122039 | 0.3475  | -1.711 |
| 93946_at   | 33.1   | 24.2   | 26.4   | 64.6   | 51.7   | 52.3   | 28.5   | 67.2   | 0.337838338 | 37.075   | 49.925   | 12.85   | 0.742613921 | 0.2895  | 1.396  |
| 93947_g_at | 19.2   | 19.1   | 16.2   | 16.6   | 17.5   | 22.9   | 13.9   | 10.7   | 0.610345157 | 17.775   | 16.25    | 1.525   | 1.093846154 | 0.4802  | -1.135 |
| 93948_at   | 115.7  | 104.2  | 119.7  | 153.1  | 86     | 154.8  | 128.6  | 76.9   | 0.60701495  | 123.175  | 111.575  | 11.6    | 1.103965942 | 0.507   | -1.139 |
| 93949_at   | 424.6  | 346.9  | 324.6  | 546.6  | 353.2  | 487.5  | 515.4  | 463    | 0.502621393 | 410.675  | 454.775  | 44.1    | 0.90302897  | 0.4621  | 1.12   |
| 93950_at   | 39.7   | 21.7   | 15.6   | 27.2   | 19.6   | 30.2   | 17     | 18.1   | 0.45603174  | 26.05    | 21.225   | 4.825   | 1.227326266 | 0.4873  | -1.19  |
| 93951_at   | 411    | 478.2  | 377.3  | 239.2  | 284.8  | 379    | 330.4  | 398.8  | 0.641327643 | 376.425  | 348.25   | 28.175  | 1.080904523 | 0.7519  | -1.057 |
| 93952_r_at | 66.3   | 64.4   | 95.6   | 113.5  | 68.4   | 83.6   | 92.4   | 92.7   | 0.961476255 | 84.95    | 84.275   | 0.675   | 1.008009493 | 0.9295  | 1.015  |
| 93953_at   | 151.3  | 94     | 95.8   | 101.1  | 75.6   | 172.5  | 149.8  | 114.4  | 0.517215693 | 110.55   | 128.075  | 17.525  | 0.863166114 | 0.5906  | 1.129  |
| 93954_at   | 152.9  | 119.8  | 166.3  | 127.9  | 131.4  | 175.2  | 206.4  | 164    | 0.20078167  | 141.725  | 169.25   | 27.525  | 0.837370753 | 0.2007  | 1.189  |
| 93955_at   | 19     | 4.1    | 25.1   | 23.6   | 7.2    | 4.9    | 8.6    | 19     | 0.217976451 | 17.95    | 9.925    | 8.025   | 1.808564232 | 0.3596  | -1.67  |



|            |        |         |        |        |         |        |        |         |             |          |          |         |             |          |        |
|------------|--------|---------|--------|--------|---------|--------|--------|---------|-------------|----------|----------|---------|-------------|----------|--------|
| 93956_at   | 40.8   | 33.3    | 16.8   | 15.6   | 28.1    | 37.4   | 30.3   | 47.1    | 0.278708062 | 26.625   | 35.725   | 9.1     | 0.745276417 | 0.2289   | 1.433  |
| 93957_at   | 41.4   | 23.2    | 36.6   | 10.7   | 36.5    | 45.8   | 33.6   | 32.2    | 0.296173696 | 27.975   | 37.025   | 9.05    | 0.75557056  | 0.26     | 1.482  |
| 93958_at   | 411.4  | 313.6   | 416.3  | 377.2  | 248.7   | 356.7  | 452.6  | 374.6   | 0.675651652 | 379.625  | 358.15   | 21.475  | 1.05996091  | 0.6168   | -1.077 |
| 93959_at   | 23.3   | 23.7    | 8.3    | 19.5   | 23.4    | 20.8   | 17.9   | 44.6    | 0.311348086 | 18.7     | 26.675   | 7.975   | 0.701030928 | 0.2933   | 1.445  |
| 93961_at   | 33.5   | 22.9    | 24.8   | 46.6   | 18.3    | 49.3   | 22.2   | 32.7    | 0.885334291 | 31.95    | 30.625   | 1.325   | 1.043265306 | 0.7896   | -1.079 |
| 93962_at   | 258    | 216.5   | 219.8  | 255.8  | 277     | 239.7  | 273.4  | 249.5   | 0.174199351 | 237.525  | 259.9    | 22.375  | 0.913909196 | 0.1718   | 1.096  |
| 93963_at   | 40.7   | 3.8     | 31.4   | 46     | 35.2    | 5.7    | 8.5    | 29      | 0.398847546 | 30.475   | 19.6     | 10.875  | 1.554846939 | 0.6282   | -1.457 |
| 93964_s_at | 526.3  | 384     | 304.1  | 832.9  | 180.8   | 305    | 955.7  | 833.4   | 0.809768455 | 511.825  | 568.725  | 56.9    | 0.899951646 | 0.9359   | -1.039 |
| 93965_r_at | 280.8  | 292.7   | 206.3  | 592.4  | 102     | 174.5  | 863.7  | 579.5   | 0.682038076 | 343.05   | 429.925  | 86.875  | 0.797929871 | 0.9583   | -1.03  |
| 93966_at   | 406    | 367.1   | 386.2  | 424    | 517.2   | 683.4  | 563.8  | 547.4   | 0.011149083 | 395.825  | 577.95   | 182.125 | 0.684877585 | 0.001514 | 1.454  |
| 93967_at   | 1124.2 | 1427.3  | 1282.6 | 1301.2 | 1194    | 1125.7 | 1244.1 | 1227.1  | 0.270326972 | 1283.825 | 1197.725 | 86.1    | 1.071886284 | 0.2631   | -1.069 |
| 93968_at   | 3386.2 | 3879.1  | 3421.6 | 3126.5 | 3987.7  | 3470.8 | 3338   | 3425    | 0.651159893 | 3453.35  | 3555.375 | 102.025 | 0.971304012 | 0.6374   | 1.03   |
| 93969_at   | 28.6   | 29.6    | 20.8   | 26.3   | 21.6    | 41.1   | 24.6   | 34.4    | 0.448523943 | 26.325   | 30.425   | 4.1     | 0.865242399 | 0.5009   | 1.129  |
| 93970_at   | 471.1  | 508.1   | 487.4  | 519.4  | 589.9   | 590    | 614.1  | 609.3   | 0.000457419 | 496.5    | 600.825  | 104.325 | 0.82636375  | 0.000217 | 1.211  |
| 93971_f_at | 1586.9 | 1801.1  | 1588.6 | 1404.5 | 1828.5  | 1483.5 | 1384.1 | 1497.3  | 0.723195639 | 1595.275 | 1548.35  | 46.925  | 1.030306455 | 0.7017   | -1.032 |
| 93972_at   | 3341.3 | 3836.1  | 3205.5 | 2926.1 | 3888.4  | 3678.9 | 3355.2 | 3562    | 0.242047681 | 3327.25  | 3621.125 | 293.875 | 0.918844282 | 0.2194   | 1.092  |
| 93973_at   | 2593.1 | 2782.5  | 2568.4 | 2264.3 | 2684.9  | 2542.4 | 1995.6 | 2356.8  | 0.428124119 | 2552.075 | 2394.925 | 157.15  | 1.065617921 | 0.4208   | -1.069 |
| 93974_at   | 446.7  | 366.6   | 406.7  | 382.8  | 356.8   | 574.3  | 392.6  | 297.8   | 0.944077145 | 400.7    | 405.375  | 4.675   | 0.988467468 | 0.9179   | 1.016  |
| 93975_at   | 542.9  | 594.6   | 664.4  | 731.8  | 594.7   | 543.8  | 584.3  | 756.8   | 0.835790946 | 633.425  | 619.9    | 13.525  | 1.021818035 | 0.8185   | -1.024 |
| 93976_at   | 955.3  | 938.2   | 1066.7 | 1023.5 | 1034.4  | 786.1  | 933.9  | 1005    | 0.417342499 | 995.925  | 939.85   | 56.075  | 1.059663776 | 0.3991   | -1.064 |
| 93978_at   | 104.2  | 79.1    | 121.9  | 119.4  | 104.1   | 104.8  | 105.1  | 155.2   | 0.513668211 | 106.15   | 117.3    | 11.15   | 0.904944587 | 0.5078   | 1.104  |
| 93980_at   | 235.5  | 305     | 334.9  | 327.4  | 462.5   | 256.8  | 176.2  | 230.1   | 0.787259182 | 300.7    | 281.4    | 19.3    | 1.068585643 | 0.5944   | -1.131 |
| 93981_at   | 514.4  | 904.3   | 787.3  | 731.5  | 588.6   | 555    | 761.2  | 733.7   | 0.473433986 | 734.375  | 659.625  | 74.75   | 1.113321963 | 0.5284   | -1.101 |
| 93982_at   | 840.5  | 581.7   | 493.5  | 635.8  | 446.9   | 764.3  | 703.4  | 498.7   | 0.756914313 | 637.875  | 603.325  | 34.55   | 1.057265984 | 0.7308   | -1.064 |
| 93983_at   | 813.8  | 758.6   | 943.1  | 842.6  | 896.6   | 764.4  | 959    | 793.3   | 0.824509861 | 839.525  | 853.325  | 13.8    | 0.983827967 | 0.8343   | 1.015  |
| 93984_at   | 6031.7 | 7060.6  | 5045.6 | 5411.3 | 7060.6  | 5598.8 | 5791.2 | 6007.8  | 0.694146868 | 5887.3   | 6114.6   | 227.3   | 0.962826677 | 0.6552   | 1.043  |
| 93985_at   | 184.7  | 264.6   | 219    | 255.2  | 366     | 216.6  | 251.5  | 593     | 0.235855571 | 230.875  | 356.775  | 125.9   | 0.64711653  | 0.1763   | 1.443  |
| 93986_at   | 1807.3 | 2270.9  | 1820   | 1950.5 | 2102    | 1986.7 | 1650.9 | 1935.1  | 0.773372963 | 1962.175 | 1918.675 | 43.5    | 1.022671896 | 0.776    | -1.022 |
| 93987_f_at | 9098.5 | 12557.4 | 7872   | 9334.7 | 11507.2 | 9443   | 9195.8 | 10450.2 | 0.718750651 | 9715.65  | 10149.05 | 433.4   | 0.957296496 | 0.6393   | 1.056  |
| 93988_at   | 3135.3 | 3143.6  | 2208.7 | 2323.2 | 2848.4  | 2530.8 | 2634.9 | 2556.1  | 0.83207584  | 2702.7   | 2642.55  | 60.15   | 1.022762105 | 0.9207   | -1.01  |
| 93990_at   | 5528.9 | 4944.4  | 4939.3 | 5806.5 | 5050.8  | 5176.3 | 6157.5 | 5875.6  | 0.480356214 | 5304.775 | 5565.05  | 260.275 | 0.953230429 | 0.485    | 1.048  |
| 93991_at   | 5930.3 | 5748.1  | 4927.2 | 5062.3 | 6304.8  | 5484.9 | 5242.7 | 5562    | 0.518546236 | 5416.975 | 5648.6   | 231.625 | 0.958994264 | 0.5075   | 1.044  |
| 93992_at   | 920.2  | 689.6   | 601.6  | 732.3  | 689.1   | 839.3  | 643.7  | 520.4   | 0.529287549 | 735.925  | 673.125  | 62.8    | 1.093296193 | 0.5151   | -1.096 |
| 93993_at   | 1074.7 | 1050.1  | 1013.4 | 809.6  | 1034.8  | 1135.7 | 958.9  | 907.6   | 0.785413714 | 986.95   | 1009.25  | 22.3    | 0.977904384 | 0.7698   | 1.025  |
| 93994_at   | 351    | 416.2   | 513.7  | 577.5  | 315.9   | 270    | 386.5  | 384.5   | 0.085223567 | 464.6    | 339.225  | 125.375 | 1.369592453 | 0.07106  | -1.36  |
| 93996_at   | 158.9  | 162.3   | 102.5  | 174.6  | 88.5    | 216    | 167.8  | 164.5   | 0.767713523 | 149.575  | 159.2    | 9.625   | 0.939541457 | 0.8879   | 1.034  |
| 93997_at   | 1199.6 | 1275.1  | 1414.9 | 1340.7 | 1538.4  | 1560.3 | 1697.7 | 1579.6  | 0.003121012 | 1307.575 | 1594     | 286.425 | 0.82031054  | 0.00301  | 1.22   |
| 93999_at   | 5599.9 | 6600.7  | 4768   | 4791.3 | 6187.7  | 5351.6 | 4973   | 5635.5  | 0.854775638 | 5439.975 | 5536.95  | 96.975  | 0.982485845 | 0.8015   | 1.024  |
| 94000_at   | 251    | 218.6   | 351.1  | 352.9  | 294.9   | 322.2  | 342.9  | 390.5   | 0.32022114  | 293.4    | 337.625  | 44.225  | 0.869011477 | 0.2884   | 1.17   |
| 94001_at   | 1370.9 | 1615.4  | 1962.1 | 1969.4 | 1519.3  | 1553.4 | 1769.7 | 1853    | 0.752856232 | 1729.45  | 1673.85  | 55.6    | 1.033216835 | 0.8093   | -1.025 |
| 94002_at   | 1596.5 | 1538.9  | 1510.7 | 1455.1 | 1630.4  | 1709.1 | 1587.7 | 1699.1  | 0.018976911 | 1525.3   | 1656.575 | 131.275 | 0.920755173 | 0.01919  | 1.086  |
| 94003_at   | 1505.4 | 1435.1  | 1821.6 | 2318   | 2111.4  | 1508   | 2111.1 | 2313    | 0.400896811 | 1770.025 | 2010.875 | 240.85  | 0.88022627  | 0.3905   | 1.143  |
| 94004_at   | 1185.7 | 1254    | 1912.1 | 1782.5 | 1107.1  | 1042   | 1353.2 | 1658.1  | 0.334687943 | 1533.575 | 1290.1   | 243.475 | 1.18872568  | 0.3357   | -1.183 |
| 94005_at   | 707.9  | 842.1   | 882.7  | 908    | 1141.6  | 724.3  | 1018   | 817.2   | 0.43471918  | 835.175  | 925.275  | 90.1    | 0.902623544 | 0.467    | 1.095  |
| 94006_at   | 98.1   | 109.9   | 103.4  | 118.8  | 94.7    | 85.6   | 151.3  | 91.4    | 0.916233861 | 107.55   | 105.75   | 1.8     | 1.017021277 | 0.7712   | -1.042 |
| 94007_at   | 8501.2 | 9769.8  | 7409.1 | 9449.7 | 8890.9  | 8655.5 | 9098.4 | 9682.3  | 0.630042028 | 8782.45  | 9081.775 | 299.325 | 0.967041135 | 0.5863   | 1.039  |
| 94008_at   | 1137   | 1264.1  | 1624.9 | 1449.5 | 1324.5  | 1239.5 | 1726.5 | 1518.2  | 0.603893038 | 1368.875 | 1452.175 | 83.3    | 0.942637767 | 0.5967   | 1.062  |
| 94009_at   | 450.2  | 477.1   | 516.8  | 451.6  | 520.9   | 596.9  | 528.9  | 451.2   | 0.198883363 | 473.925  | 524.475  | 50.55   | 0.903617904 | 0.1865   | 1.103  |
| 94010_g_at | 193.5  | 237.6   | 249.9  | 194.6  | 218.6   | 260    | 195.4  | 197.6   | 0.963377851 | 218.9    | 217.9    | 1       | 1.004589261 | 0.9625   | 1.005  |
| 94011_at   | 1326.1 | 1266    | 1646.1 | 1277.5 | 1504.8  | 1218.2 | 921.3  | 1075    | 0.246147701 | 1378.925 | 1179.825 | 199.1   | 1.168753841 | 0.2176   | -1.181 |
| 94012_at   | 133.2  | 98.8    | 148.9  | 150.2  | 133.2   | 142.2  | 131.9  | 134.3   | 0.84238885  | 132.775  | 135.4    | 2.625   | 0.980612999 | 0.7513   | 1.033  |
| 94014_at   | 2932.3 | 2503.3  | 2158.7 | 2610.8 | 2160.9  | 2797.9 | 2282.8 | 2961    | 0.998099829 | 2551.275 | 2550.65  | 0.625   | 1.000245036 | 0.9763   | 1.003  |
| 94015_at   | 690    | 596.2   | 660.4  | 659.8  | 674.5   | 762.6  | 680.9  | 754.3   | 0.074360846 | 651.6    | 718.075  | 66.475  | 0.907426105 | 0.07451  | 1.102  |
| 94016_at   | 140    | 104.5   | 90.2   | 58.5   | 79.9    | 143.3  | 93.4   | 79.6    | 0.974683758 | 98.3     | 99.05    | 0.75    | 0.992428067 | 0.9186   | 1.025  |
| 94017_s_at | 7418.2 | 6086.9  | 7227.9 | 6947   | 6562.9  | 7358.8 | 6428   | 6731.6  | 0.692812827 | 6920     | 6770.325 | 149.675 | 1.022107506 | 0.7141   | -1.021 |
| 94018_at   | 1547.4 | 1699.1  | 1940   | 2630.6 | 1689.2  | 1521.3 | 2044.7 | 1960.7  | 0.602446291 | 1954.275 | 1803.975 | 150.3   | 1.08331601  | 0.6404   | -1.068 |



|            |         |         |         |         |         |         |         |         |             |           |          |         |             |          |        |
|------------|---------|---------|---------|---------|---------|---------|---------|---------|-------------|-----------|----------|---------|-------------|----------|--------|
| 94019_at   | 1667.3  | 1629.1  | 1776.1  | 1429.2  | 1882.3  | 1973    | 1807.7  | 1726.7  | 0.051612181 | 1625.425  | 1847.425 | 222     | 0.87983274  | 0.05227  | 1.139  |
| 94020_at   | 1191.6  | 1479.4  | 1364.7  | 819.9   | 1244.1  | 1157.6  | 1135.7  | 1302.1  | 0.979963309 | 1213.9    | 1209.875 | 4.025   | 1.00332679  | 0.8911   | 1.019  |
| 94021_at   | 613.2   | 464.3   | 441.2   | 518.6   | 487.6   | 374.6   | 510.3   | 541.4   | 0.58001967  | 509.325   | 478.475  | 30.85   | 1.064475678 | 0.5796   | -1.066 |
| 94022_at   | 938.4   | 1186.1  | 980.6   | 1206.2  | 1123.7  | 716.4   | 807.5   | 809     | 0.109956824 | 1077.825  | 864.15   | 213.675 | 1.2472661   | 0.09577  | -1.258 |
| 94024_at   | 760.6   | 757.2   | 963.1   | 1104.3  | 611.5   | 701.5   | 627.3   | 651.3   | 0.056858394 | 896.3     | 647.9    | 248.4   | 1.383392499 | 0.01846  | -1.367 |
| 94025_at   | 4495.7  | 4864.6  | 2959.1  | 2663.4  | 3851.1  | 3779.8  | 2347.9  | 2569.5  | 0.405507126 | 3745.7    | 3137.075 | 608.625 | 1.194010344 | 0.4256   | -1.184 |
| 94026_at   | 115.7   | 264.2   | 154.5   | 176.7   | 135.5   | 174.9   | 144.5   | 125     | 0.383808184 | 177.775   | 144.975  | 32.8    | 1.226245904 | 0.4034   | -1.182 |
| 94027_at   | 245.2   | 192.4   | 191.5   | 177.2   | 252     | 385.7   | 181.3   | 345.9   | 0.145595855 | 201.575   | 291.225  | 89.65   | 0.692162417 | 0.1194   | 1.397  |
| 94028_f_at | 51.2    | 34.1    | 35.5    | 40.8    | 61.1    | 65.9    | 46.8    | 61.9    | 0.017589681 | 40.4      | 58.925   | 18.525  | 0.68561731  | 0.01853  | 1.465  |
| 94030_at   | 1043.1  | 1150.8  | 893.6   | 792     | 1061.1  | 871.9   | 835.8   | 787.5   | 0.449623561 | 969.875   | 889.075  | 80.8    | 1.090880972 | 0.4572   | -1.087 |
| 94031_at   | 2032.5  | 1941.7  | 2374.9  | 2238.2  | 2090.4  | 2375.2  | 2141.9  | 2147.3  | 0.734340414 | 2146.825  | 2188.7   | 41.875  | 0.980867638 | 0.7066   | 1.021  |
| 94032_at   | 3659.5  | 3116.1  | 2479.3  | 2380.1  | 2841    | 2604.5  | 2456.1  | 2570.6  | 0.408688797 | 2908.75   | 2618.05  | 290.7   | 1.11103684  | 0.4199   | -1.096 |
| 94034_at   | 270.5   | 395.2   | 397.2   | 405.8   | 451.5   | 353.8   | 357.3   | 356     | 0.767792924 | 367.175   | 379.65   | 12.475  | 0.967140788 | 0.731    | 1.042  |
| 94035_at   | 13.4    | 9.7     | 6.7     | 10.8    | 12.2    | 11.5    | 42      | 26.5    | 0.170402111 | 10.15     | 23.05    | 12.9    | 0.440347072 | 0.08658  | 2.023  |
| 94036_at   | 609.5   | 652.6   | 754.2   | 581.2   | 602.5   | 559.1   | 501.6   | 622.6   | 0.149649295 | 649.375   | 571.45   | 77.925  | 1.136363636 | 0.1399   | -1.135 |
| 94037_at   | 158     | 165     | 159.8   | 161.1   | 202.6   | 223.7   | 131.3   | 150.9   | 0.509627399 | 160.975   | 177.125  | 16.15   | 0.908821454 | 0.5802   | 1.076  |
| 94038_at   | 2181.4  | 2858.1  | 2670.3  | 2828.2  | 3100.3  | 2473.5  | 2929.6  | 3006.5  | 0.29062247  | 2634.5    | 2877.475 | 242.975 | 0.915559649 | 0.306    | 1.094  |
| 94039_at   | 40.8    | 18.5    | 16.4    | 23.2    | 26.2    | 15.2    | 25.3    | 32.5    | 0.991359793 | 24.725    | 24.8     | 0.075   | 0.996975806 | 0.9035   | 1.033  |
| 94040_at   | 7391.7  | 6508.7  | 5545.8  | 6734.2  | 6570.2  | 6369.8  | 5755    | 6568.4  | 0.617975922 | 6545.1    | 6315.85  | 229.25  | 1.036297569 | 0.6541   | 1.032  |
| 94041_at   | 2304.5  | 2059.6  | 2708.8  | 2628.1  | 2664.4  | 2289.6  | 2740.9  | 2720.4  | 0.372334219 | 2425.25   | 2603.825 | 178.575 | 0.931418202 | 0.3665   | 1.077  |
| 94042_f_at | 9955.8  | 11959.9 | 9598.4  | 11264.2 | 10545.3 | 11384.9 | 11680.4 | 11132.4 | 0.460334935 | 10694.575 | 11185.75 | 491.175 | 0.956089221 | 0.4225   | 1.049  |
| 94043_at   | 1092    | 891.1   | 1050.7  | 886.6   | 1012.4  | 1169.5  | 1141.2  | 1219.7  | 0.067343931 | 980.1     | 1135.7   | 155.6   | 0.862991987 | 0.06889  | 1.161  |
| 94044_at   | 320.3   | 268.4   | 403.1   | 541     | 292.5   | 277.5   | 410.9   | 413.1   | 0.640756087 | 383.2     | 348.5    | 34.7    | 1.099569584 | 0.6925   | -1.08  |
| 94045_at   | 7.5     | 8       | 1.3     | 9       | 5.1     | 8.7     | 3.8     | 3.7     | 0.614155317 | 6.45      | 5.325    | 1.125   | 1.211267606 | 0.9626   | 1.025  |
| 94046_at   | 408.8   | 448.2   | 374.3   | 490.4   | 267.4   | 385.4   | 352.9   | 356.4   | 0.045420845 | 430.425   | 340.525  | 89.9    | 1.264004111 | 0.05267  | -1.269 |
| 94047_at   | 1697.3  | 1597.1  | 1197.3  | 1286.1  | 1628.9  | 1567.3  | 1537.3  | 1388.6  | 0.545408982 | 1444.45   | 1530.525 | 86.075  | 0.943761128 | 0.4891   | 1.069  |
| 94048_at   | 568.5   | 538.4   | 594.6   | 477.9   | 544.9   | 516.9   | 412.5   | 428.8   | 0.146726868 | 544.85    | 475.775  | 69.075  | 1.145184173 | 0.145    | -1.149 |
| 94049_at   | 12.3    | 19.9    | 14.1    | 14.2    | 52.4    | 47.7    | 31.9    | 41.4    | 0.004592695 | 15.125    | 43.35    | 28.225  | 0.348904268 | 0.000395 | 2.864  |
| 94051_at   | 14.2    | 3.4     | 6.6     | 8.8     | 3.5     | 11.7    | 12.3    | 5.6     | 0.993944722 | 8.25      | 8.275    | 0.025   | 0.996978852 | 0.9917   | -1.005 |
| 94052_at   | 1178.5  | 1124.9  | 981.5   | 1002.5  | 1114.9  | 1146.1  | 1141.5  | 1059.8  | 0.443891847 | 1071.85   | 1115.575 | 43.725  | 0.960804966 | 0.4084   | 1.043  |
| 94053_at   | 138.7   | 99      | 63.2    | 66.5    | 46.6    | 56.9    | 80.3    | 53.2    | 0.16196062  | 91.85     | 59.25    | 32.6    | 1.55021097  | 0.1113   | -1.502 |
| 94054_at   | 3361.1  | 2575.2  | 2277.5  | 2542.6  | 2408.8  | 2944.7  | 2323.7  | 2561.9  | 0.654071856 | 2689.1    | 2559.775 | 129.325 | 1.050522019 | 0.6761   | -1.044 |
| 94055_at   | 430.2   | 378.4   | 516.8   | 432     | 236.4   | 376.8   | 455     | 397.6   | 0.238888853 | 439.35    | 366.45   | 72.9    | 1.198935735 | 0.2405   | -1.225 |
| 94056_at   | 185.8   | 160.2   | 241.5   | 208.1   | 170.3   | 233     | 257.9   | 184.1   | 0.659973991 | 198.9     | 211.325  | 12.425  | 0.941204306 | 0.6747   | 1.059  |
| 94057_g_at | 47.8    | 65.3    | 134.6   | 93.2    | 103.9   | 82.1    | 141.1   | 68.7    | 0.598612009 | 85.225    | 98.95    | 13.725  | 0.861293583 | 0.5189   | 1.205  |
| 94058_r_at | 62.8    | 17.6    | 29.3    | 56.5    | 24.9    | 23.6    | 14.7    | 40.4    | 0.257928702 | 41.55     | 25.9     | 15.65   | 1.604247104 | 0.2969   | -1.514 |
| 94059_at   | 1337.6  | 1149.1  | 1064.5  | 1125.7  | 1188.7  | 1355.9  | 1034.2  | 1194.9  | 0.793147436 | 1169.225  | 1193.425 | 24.2    | 0.979722228 | 0.7996   | 1.02   |
| 94060_at   | 931.4   | 773.1   | 971.9   | 1028.3  | 830.1   | 777.2   | 991     | 918     | 0.539608131 | 926.175   | 879.075  | 47.1    | 1.053579046 | 0.5564   | -1.052 |
| 94061_at   | 973.4   | 1253.3  | 727.2   | 652.4   | 818.8   | 1082.1  | 964.9   | 873.8   | 0.832234916 | 901.575   | 934.9    | 33.325  | 0.964354476 | 0.7031   | 1.066  |
| 94062_at   | 3554.8  | 4320.2  | 3664.7  | 3560.7  | 4040.1  | 3783.3  | 3412.2  | 4208.4  | 0.745173894 | 3775.1    | 3861     | 85.9    | 0.977751878 | 0.7395   | 1.023  |
| 94063_at   | 262.1   | 251.5   | 313.4   | 247.6   | 319.8   | 253.7   | 243.4   | 250.5   | 0.941268987 | 268.65    | 266.85   | 1.8     | 1.006745363 | 0.9247   | 1.008  |
| 94064_at   | 226.7   | 232.1   | 248.7   | 330.7   | 201.1   | 187.4   | 270.5   | 244.6   | 0.319790449 | 259.55    | 225.9    | 33.65   | 1.148959717 | 0.3004   | -1.148 |
| 94065_at   | 9.1     | 19.1    | 21.2    | 18.1    | 26.1    | 32.7    | 17.7    | 19.2    | 0.160329406 | 16.875    | 23.925   | 7.05    | 0.705329154 | 0.175    | 1.442  |
| 94066_at   | 2006    | 1743    | 1911.8  | 1745.7  | 1849.2  | 1999.6  | 1796.1  | 1975.3  | 0.537260333 | 1851.625  | 1905.05  | 53.425  | 0.971956117 | 0.525    | 1.03   |
| 94067_at   | 936.9   | 970.6   | 709.4   | 665     | 706.5   | 878.5   | 672.8   | 645.2   | 0.356769989 | 820.475   | 725.75   | 94.725  | 1.130520152 | 0.3621   | -1.123 |
| 94068_at   | 18625.3 | 21120.1 | 12765.5 | 13684.1 | 15417.5 | 15460.6 | 11901.9 | 14958.8 | 0.384094017 | 16548.75  | 14434.7  | 2114.05 | 1.146456109 | 0.4102   | -1.128 |
| 94069_r_at | 6.7     | 5.5     | 26.9    | 27.3    | 35      | 23.6    | 32      | 29.4    | 0.110759744 | 16.6      | 30       | 13.4    | 0.553333333 | 0.1066   | 2.321  |
| 94070_at   | 4.3     | 1.8     | 0.7     | 0.8     | 1.6     | 1.9     | 3.5     | 1.5     | 0.824321152 | 1.9       | 2.125    | 0.225   | 0.894117647 | 0.5126   | 1.388  |
| 94071_at   | 981.9   | 939.9   | 1048.3  | 965.7   | 947.6   | 1020.6  | 1070.9  | 1025.2  | 0.386997759 | 983.95    | 1016.075 | 32.125  | 0.968383239 | 0.3891   | 1.032  |
| 94072_g_at | 1133    | 868.4   | 1036.8  | 898.7   | 850     | 1121.7  | 1086.8  | 941.1   | 0.865216018 | 984.225   | 999.9    | 15.675  | 0.984323432 | 0.8692   | 1.016  |
| 94073_at   | 2729.8  | 3019.4  | 2871.1  | 2436.2  | 3231.3  | 2671.7  | 2414    | 2489.9  | 0.78988298  | 2764.125  | 2701.725 | 62.4    | 1.023096355 | 0.7529   | -1.027 |
| 94074_at   | 77.4    | 50.8    | 36.1    | 22.5    | 46.6    | 49      | 61.4    | 34.9    | 0.926046908 | 46.7      | 47.975   | 1.275   | 0.973423658 | 0.7208   | 1.113  |
| 94075_at   | 5.6     | 4.9     | 18.6    | 3.1     | 47.3    | 32.9    | 4.6     | 4.3     | 0.281715088 | 8.05      | 22.275   | 14.225  | 0.361391695 | 0.351    | 2.113  |
| 94076_i_at | 700.9   | 881.2   | 856.5   | 1154.2  | 1121.2  | 781     | 1313.1  | 1224.9  | 0.209123885 | 898.2     | 1110.05  | 211.85  | 0.809152741 | 0.2249   | 1.232  |
| 94077_f_at | 2678.7  | 2689.6  | 2288.9  | 2685.3  | 2313.1  | 2676.9  | 2692    | 2284.6  | 0.551983385 | 2585.625  | 2491.65  | 93.975  | 1.037715971 | 0.5527   | 1.038  |
| 94078_at   | 4125.4  | 4839.2  | 3114.2  | 2682.4  | 4410.8  | 3584.8  | 2844.9  | 3176.7  | 0.765868902 | 3690.3    | 3504.3   | 186     | 1.053077647 | 0.8207   | -1.039 |



|            |        |        |        |        |        |        |        |        |             |         |          |         |             |         |        |
|------------|--------|--------|--------|--------|--------|--------|--------|--------|-------------|---------|----------|---------|-------------|---------|--------|
| 94079_at   | 204    | 160.6  | 134.6  | 104.7  | 184    | 305.7  | 145.4  | 164.3  | 0.297131743 | 150.975 | 199.85   | 48.875  | 0.755441581 | 0.2617  | 1.306  |
| 94080_at   | 385.1  | 372.5  | 448.3  | 429.5  | 511.4  | 459.3  | 531.1  | 483.8  | 0.010791829 | 408.85  | 496.4    | 87.55   | 0.823630137 | 0.01133 | 1.216  |
| 94081_at   | 1481.6 | 1574.4 | 1951.2 | 1945   | 1584.1 | 1459.4 | 2298.3 | 2126.2 | 0.611688708 | 1738.05 | 1867     | 128.95  | 0.930931976 | 0.6594  | 1.063  |
| 94084_at   | 1330.5 | 1577.3 | 1268.6 | 1152.4 | 1358.5 | 1259.7 | 1293.5 | 1274.2 | 0.721894228 | 1332.2  | 1296.475 | 35.725  | 1.027555487 | 0.7666  | -1.021 |
| 94085_at   | 34.5   | 67.1   | 29.8   | 39.7   | 41.9   | 49.9   | 67.3   | 33.9   | 0.636561511 | 42.775  | 48.25    | 5.475   | 0.886528497 | 0.5669  | 1.148  |
| 94086_at   | 49     | 85.4   | 43.2   | 31.3   | 27.7   | 35     | 35.4   | 41.2   | 0.233442189 | 52.225  | 34.825   | 17.4    | 1.499641062 | 0.1748  | -1.414 |
| 94087_at   | 173    | 157.5  | 205.2  | 274    | 180.3  | 202.8  | 176.1  | 221.2  | 0.805928915 | 202.425 | 195.1    | 7.325   | 1.037544849 | 0.8946  | -1.019 |
| 94088_at   | 299.6  | 257.7  | 499.1  | 486.3  | 350.1  | 686    | 486.1  | 410    | 0.351285938 | 385.675 | 483.05   | 97.375  | 0.798416313 | 0.3309  | 1.264  |
| 94089_at   | 10.4   | 10.2   | 8      | 6.1    | 5.3    | 8.6    | 5.3    | 7.6    | 0.185443028 | 8.675   | 6.7      | 1.975   | 1.294776119 | 0.195   | -1.295 |
| 94090_at   | 26.4   | 81.2   | 9.8    | 26.6   | 27.5   | 60.3   | 48.3   | 32.7   | 0.736555075 | 36      | 42.2     | 6.2     | 0.853080569 | 0.4402  | 1.473  |
| 94095_at   | 79.3   | 51.9   | 68.8   | 55.4   | 67.6   | 90.6   | 53.7   | 76.4   | 0.442929706 | 63.85   | 72.075   | 8.225   | 0.885882761 | 0.455   | 1.125  |
| 94097_at   | 478.8  | 490.9  | 518.2  | 466.8  | 445.5  | 429.9  | 395.6  | 591.4  | 0.636718646 | 488.675 | 465.6    | 23.075  | 1.049559708 | 0.5328  | -1.061 |
| 94098_at   | 22.7   | 76.4   | 31.5   | 68.7   | 128.8  | 134.6  | 26.3   | 60.9   | 0.264025544 | 49.825  | 87.65    | 37.825  | 0.568454079 | 0.3412  | 1.651  |
| 94099_at   | 244.7  | 167.9  | 141.3  | 202.7  | 150.9  | 238.1  | 161.8  | 172.6  | 0.789732648 | 189.15  | 180.85   | 8.3     | 1.045894388 | 0.8064  | -1.041 |
| 94100_s_at | 69     | 53.2   | 70.2   | 82.4   | 86.3   | 42.7   | 60.9   | 62.7   | 0.627056115 | 68.7    | 63.15    | 5.55    | 1.087885986 | 0.5668  | -1.108 |
| 94101_at   | 50     | 27.1   | 45.3   | 99.2   | 28.1   | 34.8   | 117    | 40.4   | 0.990422142 | 55.4    | 55.075   | 0.325   | 1.005901044 | 0.8732  | -1.072 |
| 94102_at   | 23.3   | 20.5   | 10.9   | 16.9   | 17.2   | 9.1    | 9.4    | 30.7   | 0.830171343 | 17.9    | 16.6     | 1.3     | 1.078313253 | 0.6361  | -1.18  |
| 94103_at   | 31     | 4.9    | 20.8   | 27.9   | 27.7   | 36.6   | 20.8   | 29.8   | 0.310555349 | 21.15   | 28.725   | 7.575   | 0.736292428 | 0.3101  | 1.638  |
| 94104_at   | 156.4  | 132.8  | 122.4  | 160.3  | 157.1  | 178.4  | 189.4  | 106.2  | 0.508875541 | 142.975 | 157.775  | 14.8    | 0.906195532 | 0.5971  | 1.084  |
| 94105_at   | 4103.6 | 4251.4 | 3930.6 | 3652.4 | 4064.8 | 4358.5 | 4277.9 | 4188.1 | 0.166277063 | 3984.5  | 4222.325 | 237.825 | 0.943674397 | 0.1504  | 1.061  |
| 94106_at   | 788.6  | 737.9  | 864    | 934.4  | 821.4  | 756.8  | 840.8  | 874.5  | 0.880858615 | 831.225 | 823.375  | 7.85    | 1.00953393  | 0.9127  | -1.007 |
| 94107_at   | 17.3   | 31.5   | 16.3   | 24.8   | 75     | 42.4   | 37.4   | 34.9   | 0.069075752 | 22.475  | 47.425   | 24.95   | 0.473906168 | 0.0199  | 2.082  |
| 94108_at   | 35.5   | 35.7   | 44.5   | 39.7   | 51     | 83.9   | 40.9   | 39     | 0.249847773 | 38.85   | 53.7     | 14.85   | 0.723463687 | 0.1779  | 1.322  |
| 94109_at   | 487.9  | 487.8  | 481.9  | 570.1  | 470    | 339.2  | 431.5  | 367.1  | 0.031811243 | 506.925 | 401.95   | 104.975 | 1.261164324 | 0.03051 | -1.268 |
| 94110_f_at | 707.6  | 602.6  | 797.7  | 642.5  | 798.8  | 741.9  | 956.5  | 911.2  | 0.046181182 | 687.6   | 852.1    | 164.5   | 0.806947541 | 0.04397 | 1.24   |
| 94111_r_at | 326.8  | 308.3  | 287.8  | 276.2  | 279.1  | 373    | 356.7  | 366.7  | 0.139243128 | 299.775 | 343.875  | 44.1    | 0.871755725 | 0.1377  | 1.142  |
| 94112_at   | 35.6   | 11.2   | 17     | 22.9   | 24.8   | 51.2   | 22.4   | 36.8   | 0.202220313 | 21.675  | 33.8     | 12.125  | 0.641272189 | 0.1731  | 1.611  |
| 94113_at   | 106.3  | 117.9  | 97.7   | 117.5  | 123.7  | 125.9  | 122.3  | 157.7  | 0.071268137 | 109.85  | 132.4    | 22.55   | 0.829682779 | 0.0503  | 1.202  |
| 94114_at   | 61     | 53.1   | 41.5   | 56     | 42     | 42.7   | 46.8   | 57.1   | 0.329530796 | 52.9    | 47.15    | 5.75    | 1.12195122  | 0.3382  | -1.12  |
| 94115_at   | 6.1    | 4.9    | 1.9    | 3      | 4.7    | 6.6    | 3.7    | 5.1    | 0.389584058 | 3.975   | 5.025    | 1.05    | 0.791044776 | 0.3256  | 1.368  |
| 94116_at   | 10.1   | 7      | 6.5    | 13.1   | 10.2   | 6.4    | 7      | 7.4    | 0.454510409 | 9.175   | 7.75     | 1.425   | 1.183870968 | 0.4759  | -1.157 |
| 94117_f_at | 297.2  | 251    | 319.1  | 351.3  | 307.8  | 402.7  | 330    | 286.2  | 0.44406021  | 304.65  | 331.675  | 27.025  | 0.918519635 | 0.4417  | 1.088  |
| 94118_r_at | 164.1  | 115.9  | 138    | 153.5  | 146.6  | 169.8  | 119.2  | 109.7  | 0.717040435 | 142.875 | 136.325  | 6.55    | 1.048046947 | 0.6852  | -1.055 |
| 94119_at   | 30.6   | 34.1   | 34.8   | 38.3   | 31.3   | 47.1   | 43.2   | 34.2   | 0.326618446 | 34.45   | 38.95    | 4.5     | 0.884467266 | 0.3355  | 1.118  |
| 94120_s_at | 34.1   | 28.5   | 39     | 25.1   | 39.5   | 66.5   | 51.1   | 32.5   | 0.122278552 | 31.675  | 47.4     | 15.725  | 0.668248945 | 0.08311 | 1.464  |
| 94121_at   | 61.6   | 26.7   | 8.7    | 55.5   | 17.2   | 50.8   | 43.3   | 8.4    | 0.628244435 | 38.125  | 29.925   | 8.2     | 1.274018379 | 0.721   | -1.259 |
| 94122_at   | 377.8  | 360.3  | 379.9  | 312.7  | 380    | 408.2  | 455    | 359.8  | 0.150656379 | 357.675 | 400.75   | 43.075  | 0.892514036 | 0.1484  | 1.119  |
| 94123_at   | 5.4    | 10.9   | 5.3    | 17     | 1.8    | 8.3    | 2.5    | 5.1    | 0.162994841 | 9.65    | 4.425    | 5.225   | 2.18079096  | 0.1168  | -2.256 |
| 94124_at   | 397.3  | 315.3  | 323.6  | 359.7  | 321    | 354.7  | 300.2  | 274.9  | 0.20126812  | 348.975 | 312.7    | 36.275  | 1.116005756 | 0.1956  | -1.116 |
| 94125_at   | 81.5   | 77.9   | 37.1   | 48.1   | 34.1   | 78.5   | 36.7   | 40.8   | 0.402500603 | 61.15   | 47.525   | 13.625  | 1.286691215 | 0.3737  | -1.297 |
| 94126_at   | 22.3   | 14.9   | 31.9   | 37.9   | 26.9   | 46.8   | 33.1   | 42     | 0.174226562 | 26.75   | 37.2     | 10.45   | 0.719086022 | 0.1785  | 1.444  |
| 94127_at   | 103.7  | 121.4  | 115.8  | 238    | 66.5   | 108.5  | 148.2  | 145.7  | 0.487824457 | 144.725 | 117.225  | 27.5    | 1.234591597 | 0.4802  | -1.221 |
| 94128_at   | 13.5   | 40.5   | 57.3   | 46.8   | 48.3   | 54.3   | 38.7   | 25.9   | 0.846868565 | 39.525  | 41.8     | 2.275   | 0.945574163 | 0.7008  | 1.157  |
| 94129_at   | 10.6   | 22.9   | 25.9   | 3.4    | 8.6    | 36.2   | 15     | 17.7   | 0.659540729 | 15.7    | 19.375   | 3.675   | 0.810322581 | 0.564   | 1.399  |
| 94130_at   | 13.8   | 27     | 17.4   | 12.4   | 14.2   | 23.6   | 8.2    | 8.3    | 0.437254035 | 17.65   | 13.575   | 4.075   | 1.300184162 | 0.3462  | -1.366 |
| 94131_at   | 44.1   | 35.5   | 35.1   | 33.1   | 28.7   | 38.4   | 38.3   | 42.7   | 0.985053807 | 36.95   | 37.025   | 0.075   | 0.997974342 | 0.9842  | 1.002  |
| 94132_at   | 674.3  | 585.8  | 512.8  | 730.3  | 720    | 965.8  | 578.5  | 518.2  | 0.559204839 | 625.8   | 695.625  | 69.825  | 0.899622642 | 0.6067  | 1.09   |
| 94133_r_at | 29.9   | 25.3   | 41.3   | 46.1   | 21.2   | 39.1   | 50     | 45.3   | 0.697861427 | 35.65   | 38.9     | 3.25    | 0.916452442 | 0.7905  | 1.068  |
| 94134_at   | 229.5  | 100.9  | 107.6  | 156.6  | 101.1  | 178.2  | 144.9  | 148.2  | 0.876025402 | 148.65  | 143.1    | 5.55    | 1.038784067 | 0.9929  | -1.002 |
| 94135_at   | 291.1  | 278.2  | 375.9  | 359.3  | 251.8  | 352.2  | 371.6  | 364.6  | 0.81815483  | 326.125 | 335.05   | 8.925   | 0.973362185 | 0.8499  | 1.024  |
| 94136_at   | 24.6   | 13.7   | 25.2   | 10.4   | 23.6   | 19.3   | 18.8   | 14.8   | 0.883442766 | 18.475  | 19.125   | 0.65    | 0.966013072 | 0.7239  | 1.093  |
| 94137_at   | 46     | 32.8   | 27.7   | 35.1   | 30.8   | 29.6   | 36.9   | 26.6   | 0.365522728 | 35.4    | 30.975   | 4.425   | 1.142857143 | 0.363   | -1.132 |
| 94138_s_at | 142.8  | 85.2   | 100.7  | 105.6  | 55.2   | 129.5  | 106.1  | 55.7   | 0.368060931 | 108.575 | 86.625   | 21.95   | 1.253391053 | 0.297   | -1.323 |
| 94139_at   | 50.7   | 9.8    | 16.1   | 45.2   | 8      | 26.6   | 17.3   | 21.1   | 0.330507283 | 30.45   | 18.25    | 12.2    | 1.668493151 | 0.4536  | -1.466 |
| 94140_at   | 49.7   | 29     | 26.3   | 38.7   | 24.2   | 33.1   | 40     | 38.9   | 0.781416253 | 35.925  | 34.05    | 1.875   | 1.055066079 | 0.8336  | 1.041  |
| 94141_at   | 25.4   | 10     | 12     | 7.6    | 8.4    | 27.7   | 12.5   | 12.6   | 0.79910959  | 13.75   | 15.3     | 1.55    | 0.89869281  | 0.7653  | 1.119  |



|            |       |       |       |       |       |       |       |       |             |         |         |        |             |          |        |
|------------|-------|-------|-------|-------|-------|-------|-------|-------|-------------|---------|---------|--------|-------------|----------|--------|
| 94142_at   | 188.8 | 184.1 | 203.6 | 236.7 | 177.3 | 405.4 | 236.3 | 207.7 | 0.376557844 | 203.3   | 256.675 | 53.375 | 0.792052206 | 0.3607   | 1.205  |
| 94143_at   | 13.6  | 38.6  | 6.5   | 5.8   | 7.8   | 10.5  | 5.6   | 8.6   | 0.376240992 | 16.125  | 8.125   | 8      | 1.984615385 | 0.4146   | -1.49  |
| 94144_g_at | 109.4 | 102.3 | 87.8  | 105.2 | 59.4  | 165.5 | 106.4 | 137.8 | 0.53459271  | 101.175 | 117.275 | 16.1   | 0.862715839 | 0.7285   | 1.087  |
| 94145_at   | 35.2  | 47.7  | 24.9  | 21.9  | 43    | 49.1  | 40.1  | 7     | 0.839171616 | 32.425  | 34.8    | 2.375  | 0.931752874 | 0.8325   | -1.115 |
| 94146_at   | 28.3  | 19.4  | 19    | 15.8  | 16.9  | 26    | 19.2  | 13    | 0.645783113 | 20.625  | 18.775  | 1.85   | 1.098535286 | 0.6107   | -1.107 |
| 94147_at   | 42.5  | 39.2  | 45.5  | 45.2  | 49.7  | 59.4  | 28.9  | 52.1  | 0.552393666 | 43.1    | 47.525  | 4.425  | 0.90689111  | 0.6996   | 1.068  |
| 94148_at   | 53.1  | 51.4  | 52    | 96.7  | 55.2  | 52.7  | 75.9  | 47.6  | 0.688090551 | 63.3    | 57.85   | 5.45   | 1.094209162 | 0.7299   | -1.069 |
| 94149_at   | 59.1  | 41.6  | 105.5 | 68.2  | 32.1  | 96.9  | 44.4  | 30.1  | 0.424708193 | 68.6    | 50.875  | 17.725 | 1.348402948 | 0.3152   | -1.436 |
| 94150_at   | 29.5  | 29.5  | 16    | 38.3  | 39.1  | 17.9  | 14.5  | 34.3  | 0.813731792 | 28.325  | 26.45   | 1.875  | 1.070888469 | 0.7395   | -1.112 |
| 94151_at   | 22.4  | 8.6   | 11.4  | 2.1   | 14.7  | 27.3  | 0.8   | 13.9  | 0.673553544 | 11.125  | 14.175  | 3.05   | 0.784832451 | 0.9975   | 1.003  |
| 94152_at   | 18.6  | 15.2  | 1.6   | 3.3   | 11.5  | 12.3  | 16.2  | 19    | 0.330968407 | 9.675   | 14.75   | 5.075  | 0.655932203 | 0.2151   | 2.332  |
| 94153_g_at | 13    | 9.9   | 7.5   | 6.6   | 9.4   | 17.6  | 15    | 15.6  | 0.065204382 | 9.25    | 14.4    | 5.15   | 0.642361111 | 0.06931  | 1.569  |
| 94154_at   | 10.4  | 12.7  | 13    | 44    | 24.8  | 42.9  | 6.1   | 5     | 0.979328614 | 20.025  | 19.7    | 0.325  | 1.016497462 | 0.7441   | -1.237 |
| 94155_at   | 2     | 2.2   | 2.6   | 3.3   | 2.9   | 5.2   | 2.4   | 1.9   | 0.504651496 | 2.525   | 3.1     | 0.575  | 0.814516129 | 0.543    | 1.167  |
| 94156_at   | 71.8  | 33.4  | 48.4  | 43.8  | 121.2 | 93.9  | 94.8  | 95.9  | 0.002804523 | 49.35   | 101.45  | 52.1   | 0.486446525 | 0.004423 | 2.124  |
| 94157_i_at | 2.9   | 1.6   | 1.1   | 1.1   | 0.7   | 1.1   | 2.8   | 1.4   | 0.788488424 | 1.675   | 1.5     | 0.175  | 1.116666667 | 0.7039   | -1.162 |
| 94158_f_at | 76.8  | 91.9  | 59.4  | 77.2  | 64.3  | 138.1 | 90.2  | 60    | 0.571482038 | 76.325  | 88.15   | 11.825 | 0.865853659 | 0.6564   | 1.104  |
| 94159_at   | 33.6  | 33.3  | 24.7  | 49.5  | 97.2  | 122.7 | 127.5 | 31.7  | 0.070487589 | 35.275  | 94.775  | 59.5   | 0.372197309 | 0.04723  | 2.435  |
| 94160_at   | 323.3 | 312   | 288.2 | 275.6 | 240   | 424.1 | 328.8 | 307.4 | 0.562148981 | 299.775 | 325.075 | 25.3   | 0.922171807 | 0.6275   | 1.065  |
| 94161_at   | 78.5  | 108.8 | 99    | 86.1  | 53.3  | 76.1  | 73.9  | 70    | 0.028702384 | 93.1    | 68.325  | 24.775 | 1.362605196 | 0.02906  | -1.365 |
| 94162_at   | 393.8 | 382   | 578.4 | 684.7 | 567.7 | 536.6 | 384.4 | 584.6 | 0.924821505 | 509.725 | 518.325 | 8.6    | 0.983408093 | 0.848    | 1.035  |
| 94163_at   | 517.4 | 384.2 | 392.9 | 341.7 | 305.7 | 384.5 | 316   | 385.4 | 0.221569792 | 409.05  | 347.9   | 61.15  | 1.175768899 | 0.198    | -1.168 |
| 94164_at   | 51.4  | 9.7   | 21.4  | 27.5  | 14.9  | 14.1  | 45.1  | 49.4  | 0.802912083 | 27.5    | 30.875  | 3.375  | 0.890688259 | 0.8207   | 1.122  |
| 94165_at   | 46.2  | 17.8  | 18.8  | 28.5  | 26.5  | 16    | 15.7  | 39    | 0.695961148 | 27.825  | 24.3    | 3.525  | 1.145061728 | 0.6869   | -1.14  |
| 94166_g_at | 114.9 | 121   | 57.2  | 113.7 | 58.8  | 108   | 59.8  | 60.9  | 0.173058827 | 101.7   | 71.875  | 29.825 | 1.414956522 | 0.1914   | -1.407 |
| 94167_at   | 15.4  | 17.1  | 25.3  | 17.8  | 10.1  | 16.2  | 10.2  | 23.5  | 0.35545275  | 18.9    | 15      | 3.9    | 1.26        | 0.2789   | -1.316 |
| 94168_at   | 12.6  | 17.7  | 12.4  | 16.1  | 11.9  | 19.2  | 14.2  | 15.1  | 0.849031049 | 14.7    | 15.1    | 0.4    | 0.973509934 | 0.8502   | 1.027  |
| 94169_at   | 24.9  | 13.2  | 16.6  | 14.2  | 12    | 27.6  | 23.7  | 15.7  | 0.593211166 | 17.225  | 19.75   | 2.525  | 0.872151899 | 0.6436   | 1.123  |
| 94170_at   | 188.2 | 115.6 | 65.7  | 55.8  | 93.9  | 122.1 | 140   | 117.2 | 0.727064005 | 106.325 | 118.3   | 11.975 | 0.898774303 | 0.4867   | 1.239  |
| 94171_at   | 114.1 | 76.9  | 56.9  | 99.5  | 88.4  | 158.6 | 87    | 83.1  | 0.463515872 | 86.85   | 104.275 | 17.425 | 0.83289379  | 0.4422   | 1.195  |
| 94172_at   | 12.7  | 14.7  | 17.3  | 13.6  | 9.3   | 63.6  | 12.6  | 42.1  | 0.271535894 | 14.575  | 31.9    | 17.325 | 0.456896552 | 0.337    | 1.632  |
| 94173_at   | 23.4  | 19    | 46    | 53.3  | 42.6  | 16.3  | 55.1  | 62.6  | 0.533358192 | 35.425  | 44.15   | 8.725  | 0.802378256 | 0.6343   | 1.219  |
| 94174_at   | 178.6 | 154.5 | 211.7 | 187   | 108   | 92.2  | 206.1 | 146.1 | 0.179713136 | 182.95  | 138.1   | 44.85  | 1.324764663 | 0.1378   | -1.382 |
| 94175_at   | 29.1  | 25.4  | 52.5  | 79.3  | 47.9  | 95.8  | 26.3  | 76.4  | 0.476860993 | 46.575  | 61.6    | 15.025 | 0.756087662 | 0.5079   | 1.315  |
| 94176_at   | 94.6  | 57.5  | 93.6  | 114.1 | 98.1  | 151.1 | 85.7  | 118.5 | 0.255072587 | 89.95   | 113.35  | 23.4   | 0.793559771 | 0.2596   | 1.269  |
| 94177_at   | 69.5  | 66.1  | 60.9  | 110.7 | 25.3  | 65.6  | 115.3 | 112.1 | 0.913658515 | 76.8    | 79.575  | 2.775  | 0.965127238 | 0.8169   | -1.096 |
| 94178_at   | 20.8  | 5.3   | 6.3   | 4.4   | 0.8   | 3.5   | 12.1  | 16.4  | 0.857305685 | 9.2     | 8.2     | 1      | 1.12195122  | 0.5957   | -1.548 |
| 94179_at   | 33.5  | 16.2  | 3     | 28.4  | 11.8  | 37.9  | 7.2   | 19.8  | 0.912467933 | 20.275  | 19.175  | 1.1    | 1.057366362 | 0.908    | 1.082  |
| 94180_s_at | 17.3  | 35.7  | 11.7  | 17.2  | 17    | 31.2  | 10.5  | 17.5  | 0.84146164  | 20.475  | 19.05   | 1.425  | 1.07480315  | 0.8527   | -1.065 |
| 94181_at   | 7.5   | 8.7   | 4.1   | 4.4   | 5     | 8.9   | 9.4   | 8.2   | 0.303842067 | 6.175   | 7.875   | 1.7    | 0.784126984 | 0.3051   | 1.308  |
| 94182_at   | 25.7  | 11.2  | 12.3  | 11.6  | 9.4   | 12.7  | 11.4  | 15.7  | 0.484000184 | 15.2    | 12.3    | 2.9    | 1.235772358 | 0.4915   | -1.179 |
| 94183_at   | 418.3 | 275.3 | 196.1 | 319.2 | 262.8 | 310.4 | 272.4 | 411.9 | 0.84028717  | 302.225 | 314.375 | 12.15  | 0.961351889 | 0.7614   | 1.062  |
| 94184_at   | 78.9  | 39.1  | 38.7  | 56.5  | 63    | 99    | 69.7  | 39.4  | 0.388895817 | 53.3    | 67.775  | 14.475 | 0.786425673 | 0.3956   | 1.263  |
| 94185_at   | 216.5 | 218   | 185.3 | 187.3 | 239   | 227.9 | 182.2 | 190.4 | 0.644411476 | 201.775 | 209.875 | 8.1    | 0.961405599 | 0.6696   | 1.036  |
| 94186_at   | 4.7   | 6.3   | 5.5   | 3.3   | 4.2   | 7.6   | 3.3   | 6.6   | 0.706341645 | 4.95    | 5.425   | 0.475  | 0.912442396 | 0.8156   | 1.061  |
| 94187_at   | 12.5  | 15.9  | 25.7  | 35.5  | 4.5   | 10    | 3.7   | 8.1   | 0.050480248 | 22.4    | 6.575   | 15.825 | 3.406844106 | 0.0104   | -3.388 |
| 94188_at   | 321.3 | 361.6 | 344.4 | 377.8 | 274.8 | 315.3 | 348.5 | 265.9 | 0.076556919 | 351.275 | 301.125 | 50.15  | 1.166542134 | 0.06938  | -1.171 |
| 94189_at   | 55.7  | 41.5  | 94.6  | 116.8 | 53.7  | 58.9  | 67    | 94.9  | 0.683670253 | 77.15   | 68.625  | 8.525  | 1.124225865 | 0.8301   | -1.062 |
| 94190_at   | 66.5  | 68.7  | 67.5  | 84.9  | 49.8  | 108.4 | 71.1  | 55.1  | 0.957214371 | 71.9    | 71.1    | 0.8    | 1.011251758 | 0.7795   | -1.055 |
| 94191_at   | 24.8  | 22.8  | 24.2  | 29.5  | 19.1  | 36.1  | 24.8  | 56.7  | 0.366569416 | 25.325  | 34.175  | 8.85   | 0.741038771 | 0.4005   | 1.246  |
| 94192_at   | 152.1 | 108.3 | 147.8 | 185.9 | 160.2 | 150.6 | 215.7 | 270.6 | 0.176263504 | 148.525 | 199.275 | 50.75  | 0.74532681  | 0.1585   | 1.328  |
| 94193_at   | 55.2  | 52.8  | 76.8  | 72.1  | 39.4  | 74.4  | 64.9  | 81.7  | 0.939653006 | 64.225  | 65.1    | 0.875  | 0.98655914  | 0.9601   | -1.01  |
| 94194_s_at | 9.7   | 5.6   | 6.8   | 5.3   | 12    | 4.7   | 10    | 3.4   | 0.782250499 | 6.85    | 7.525   | 0.675  | 0.910299003 | 0.9865   | 1.006  |
| 94195_r_at | 741.3 | 736.6 | 673.8 | 705.9 | 723.7 | 968.3 | 616.5 | 747.7 | 0.553938616 | 714.4   | 764.05  | 49.65  | 0.935017342 | 0.5908   | 1.056  |
| 94196_at   | 288.5 | 255.9 | 251.7 | 235.5 | 227.8 | 339.5 | 282.4 | 239.4 | 0.629617811 | 257.9   | 272.275 | 14.375 | 0.947204113 | 0.6705   | 1.046  |
| 94197_at   | 170.7 | 132   | 223   | 211.4 | 92.9  | 194.2 | 319.6 | 250.9 | 0.594322867 | 184.275 | 214.4   | 30.125 | 0.859491604 | 0.8011   | 1.08   |



|            |        |        |        |        |        |        |        |        |             |          |          |         |             |          |        |
|------------|--------|--------|--------|--------|--------|--------|--------|--------|-------------|----------|----------|---------|-------------|----------|--------|
| 94198_at   | 42.3   | 13.2   | 9.6    | 7.6    | 20.5   | 11.3   | 28.7   | 6.6    | 0.888606966 | 18.175   | 16.775   | 1.4     | 1.083457526 | 0.9754   | 1.016  |
| 94199_at   | 67.2   | 62.7   | 30     | 52.1   | 39.9   | 39.6   | 52.3   | 29.2   | 0.24192734  | 53       | 40.25    | 12.75   | 1.316770186 | 0.2945   | -1.285 |
| 94200_at   | 24.7   | 15.5   | 13.3   | 25.3   | 8.5    | 18.6   | 19.6   | 11.6   | 0.259149088 | 19.7     | 14.575   | 5.125   | 1.351629503 | 0.2609   | -1.377 |
| 94201_at   | 3.3    | 1.6    | 0.6    | 1      | 2.4    | 4.8    | 1.6    | 2      | 0.294560703 | 1.625    | 2.7      | 1.075   | 0.601851852 | 0.2033   | 1.858  |
| 94202_at   | 45.3   | 35.9   | 43.3   | 32.5   | 37.8   | 21.5   | 63.1   | 14.2   | 0.677271935 | 39.25    | 34.15    | 5.1     | 1.149341142 | 0.4272   | -1.33  |
| 94203_at   | 78.4   | 87.2   | 76.1   | 72.5   | 36.1   | 84.8   | 69.7   | 54.5   | 0.196847611 | 78.55    | 61.275   | 17.275  | 1.281925745 | 0.1701   | -1.341 |
| 94205_at   | 5      | 5.2    | 3.9    | 4.2    | 20.6   | 9.9    | 2.1    | 6.3    | 0.284510653 | 4.575    | 9.725    | 5.15    | 0.470437018 | 0.3679   | 1.592  |
| 94206_at   | 5358.3 | 5462.9 | 3973.1 | 3754.8 | 4435.7 | 4231.6 | 4101.1 | 4158.9 | 0.435608369 | 4637.275 | 4231.825 | 405.45  | 1.095809727 | 0.465    | -1.081 |
| 94207_at   | 280.7  | 322.4  | 306.2  | 330.9  | 378.5  | 362.5  | 468.2  | 360.5  | 0.040659895 | 310.05   | 392.425  | 82.375  | 0.790087278 | 0.01783  | 1.261  |
| 94208_at   | 2111.3 | 1782.6 | 2336.2 | 1607.9 | 1176.7 | 2116.7 | 3166.5 | 1930.2 | 0.770448745 | 1959.5   | 2097.525 | 138.025 | 0.934196255 | 0.9357   | 1.019  |
| 94209_g_at | 1587.2 | 1323.6 | 1455.4 | 1414.1 | 1173.4 | 1535.7 | 2307.6 | 1612.5 | 0.44143405  | 1445.075 | 1657.3   | 212.225 | 0.871945333 | 0.4752   | 1.116  |
| 94210_at   | 3236.8 | 3043.9 | 2208.1 | 2085.8 | 2410.9 | 2621.7 | 1969.4 | 2185.8 | 0.339004748 | 2643.65  | 2296.95  | 346.7   | 1.150939289 | 0.3531   | -1.136 |
| 94211_at   | 435.1  | 487.1  | 451.8  | 452.7  | 481.4  | 539    | 475    | 513.1  | 0.052286829 | 456.675  | 502.125  | 45.45   | 0.90948469  | 0.04619  | 1.099  |
| 94212_at   | 36.2   | 72.8   | 94.8   | 18.8   | 25.9   | 86.2   | 23.6   | 24.1   | 0.522825081 | 55.65    | 39.95    | 15.7    | 1.392991239 | 0.5208   | -1.388 |
| 94214_at   | 939.1  | 1055.6 | 997.6  | 1153.8 | 1647.5 | 1388.2 | 1994.2 | 1364.7 | 0.026137859 | 1036.525 | 1598.65  | 562.125 | 0.648375192 | 0.005134 | 1.528  |
| 94215_at   | 53.4   | 7.9    | 27.8   | 22.1   | 41.5   | 50.5   | 31.6   | 29.3   | 0.378776429 | 27.8     | 38.225   | 10.425  | 0.727272727 | 0.2708   | 1.655  |
| 94216_at   | 2213.5 | 2222   | 2692.5 | 2374.6 | 2148.4 | 2604.4 | 2363.1 | 2369.4 | 0.977296577 | 2375.65  | 2371.325 | 4.325   | 1.001823875 | 0.9877   | 1.001  |
| 94217_f_at | 364.7  | 375.3  | 354    | 396.4  | 455.3  | 453.9  | 456.8  | 446.7  | 0.002061751 | 372.6    | 453.175  | 80.575  | 0.82219893  | 0.000205 | 1.217  |
| 94218_at   | 543.8  | 464.7  | 406.5  | 492.3  | 495.6  | 660.1  | 415.2  | 448.5  | 0.668980192 | 476.825  | 504.85   | 28.025  | 0.944488462 | 0.7073   | 1.048  |
| 94219_at   | 3778.6 | 4199.4 | 2888.2 | 2307.4 | 3208.7 | 3602.6 | 2618.5 | 2443.5 | 0.547311949 | 3293.4   | 2968.325 | 325.075 | 1.109514625 | 0.6013   | -1.093 |
| 94220_at   | 99.5   | 28.4   | 53.3   | 80.6   | 60     | 153.2  | 76     | 67.8   | 0.408622554 | 65.45    | 89.25    | 23.8    | 0.733333333 | 0.3644   | 1.405  |
| 94222_at   | 384.8  | 262.2  | 263    | 329.8  | 246.5  | 384.8  | 252.8  | 249.9  | 0.577591689 | 309.95   | 283.5    | 26.45   | 1.09329806  | 0.5324   | -1.099 |
| 94223_at   | 102.5  | 128.7  | 139.5  | 154.6  | 151.7  | 222.3  | 158.2  | 175.6  | 0.061827357 | 131.325  | 176.95   | 45.625  | 0.742158802 | 0.05058  | 1.347  |
| 94224_s_at | 113.8  | 100.8  | 91.3   | 91.2   | 147    | 119.5  | 129.1  | 162.8  | 0.016173241 | 99.275   | 139.6    | 40.325  | 0.711138968 | 0.007826 | 1.402  |
| 94225_at   | 565.8  | 522.9  | 600.7  | 479    | 606.6  | 670.9  | 584.6  | 574.9  | 0.098204529 | 542.1    | 609.25   | 67.15   | 0.889782519 | 0.09596  | 1.126  |
| 94226_at   | 385.9  | 389.6  | 320.4  | 310.3  | 360.2  | 330    | 285.1  | 311    | 0.301106963 | 351.55   | 321.575  | 29.975  | 1.093213092 | 0.3034   | -1.091 |
| 94227_at   | 38.5   | 35.2   | 35     | 41.1   | 34.5   | 48.8   | 42.8   | 38.7   | 0.325115102 | 37.45    | 41.2     | 3.75    | 0.908980583 | 0.3211   | 1.094  |
| 94228_at   | 932    | 1057.9 | 1464.4 | 1636.6 | 1499   | 975    | 1532.3 | 1545.3 | 0.613662737 | 1272.725 | 1387.9   | 115.175 | 0.917014915 | 0.6029   | 1.1    |
| 94229_at   | 734.8  | 643.5  | 910.5  | 829.9  | 599.4  | 880.3  | 746.6  | 582.9  | 0.427356246 | 779.675  | 702.3    | 77.375  | 1.110173715 | 0.4038   | -1.117 |
| 94231_at   | 115.1  | 143.2  | 126    | 137    | 98.5   | 144.5  | 121.8  | 116.4  | 0.415338985 | 130.325  | 120.3    | 10.025  | 1.083333333 | 0.3887   | -1.089 |
| 94232_at   | 241.5  | 335.6  | 399    | 425.9  | 224.3  | 447.8  | 440.2  | 411.2  | 0.666331206 | 350.5    | 380.875  | 30.375  | 0.920249426 | 0.7505   | 1.072  |
| 94233_at   | 614.8  | 524.8  | 509.6  | 544.6  | 566.8  | 541.3  | 588.4  | 575.6  | 0.481461461 | 548.45   | 568.025  | 19.575  | 0.965538489 | 0.439    | 1.038  |
| 94235_at   | 258.4  | 194    | 256.5  | 264.8  | 249.9  | 254.4  | 281.9  | 317.5  | 0.202892039 | 243.425  | 275.925  | 32.5    | 0.88221437  | 0.2117   | 1.137  |
| 94236_at   | 2752.6 | 3040.4 | 3300.6 | 4024.6 | 3243.8 | 2704.6 | 3647.8 | 3552.2 | 0.983312325 | 3279.55  | 3287.1   | 7.55    | 0.997703143 | 0.9595   | 1.006  |
| 94237_at   | 1637.6 | 1898   | 1847.4 | 1713.9 | 2259.4 | 1778.2 | 2186.2 | 2106.3 | 0.055244659 | 1774.225 | 2082.525 | 308.3   | 0.85195856  | 0.04654  | 1.171  |
| 94238_at   | 81     | 141.8  | 157.3  | 180.3  | 132.9  | 145.6  | 282.8  | 206.9  | 0.254061025 | 140.1    | 192.05   | 51.95   | 0.729497527 | 0.2536   | 1.365  |
| 94239_at   | 413.5  | 341.9  | 610.3  | 681.9  | 600.9  | 420.6  | 547.1  | 632.7  | 0.696593831 | 511.9    | 550.325  | 38.425  | 0.930177622 | 0.6131   | 1.104  |
| 94240_i_at | 138.6  | 307.9  | 29.1   | 429    | 277.1  | 325.4  | 466.5  | 46.4   | 0.686631383 | 226.15   | 278.85   | 52.7    | 0.811009503 | 0.6958   | 1.383  |
| 94241_at   | 267    | 249.2  | 249.3  | 282.2  | 261.7  | 273.3  | 236.9  | 264    | 0.799637146 | 261.925  | 258.975  | 2.95    | 1.011391061 | 0.7996   | 1.011  |
| 94242_at   | 894.1  | 1318.6 | 1200.3 | 1232.1 | 1687.3 | 1218.8 | 1379.3 | 1238.5 | 0.174825132 | 1161.275 | 1380.975 | 219.7   | 0.840909502 | 0.1754   | 1.191  |
| 94243_at   | 1231.4 | 1128.5 | 1181.7 | 1020.7 | 1145.1 | 900.9  | 1054.5 | 898.6  | 0.115861785 | 1140.575 | 999.775  | 140.8   | 1.140831687 | 0.1119   | -1.144 |
| 94244_at   | 741.1  | 621.7  | 797.8  | 833.1  | 647.9  | 693.3  | 758.8  | 793.5  | 0.675470881 | 748.425  | 723.375  | 25.05   | 1.034629342 | 0.7073   | -1.032 |
| 94245_at   | 503.2  | 483.7  | 335.2  | 450.3  | 512.3  | 458.8  | 439.9  | 439.7  | 0.659219462 | 443.1    | 462.675  | 19.575  | 0.957691684 | 0.6089   | 1.055  |
| 94246_at   | 373.5  | 351.9  | 370.1  | 422.6  | 294.9  | 233.5  | 304.1  | 396.6  | 0.118944472 | 379.525  | 307.275  | 72.25   | 1.235131397 | 0.09696  | -1.254 |
| 94247_at   | 686.4  | 501.2  | 892    | 1144.5 | 896.2  | 597.1  | 946.6  | 935.1  | 0.824369006 | 806.025  | 843.75   | 37.725  | 0.955288889 | 0.7324   | 1.078  |
| 94248_at   | 2032.2 | 1539.2 | 1386   | 1557.7 | 1290.9 | 1680.9 | 1787.5 | 1633.5 | 0.868412618 | 1628.775 | 1598.2   | 30.575  | 1.019130897 | 0.8878   | 1.016  |
| 94249_at   | 750.9  | 1063.9 | 899.3  | 775    | 1125.7 | 797.1  | 689.7  | 846.1  | 0.950443692 | 872.275  | 864.65   | 7.625   | 1.008818597 | 0.91     | -1.015 |
| 94250_at   | 1093   | 1170.3 | 1359.3 | 1413.3 | 1310.7 | 1147.6 | 1573.6 | 1407.9 | 0.422720804 | 1258.975 | 1359.95  | 100.975 | 0.925750947 | 0.4295   | 1.079  |
| 94252_at   | 3493   | 2966.7 | 2896.6 | 2640.7 | 2833.5 | 3317.5 | 3210.6 | 2601   | 0.973056332 | 2999.25  | 2990.65  | 8.6     | 1.002875629 | 0.977    | 1.002  |
| 94253_at   | 1792.2 | 1727   | 1709.5 | 1590.8 | 1699.6 | 1643.9 | 1924.7 | 1647.3 | 0.772398278 | 1704.875 | 1728.875 | 24      | 0.98611814  | 0.7854   | 1.013  |
| 94254_at   | 1580.6 | 1352.1 | 1287.7 | 1352.7 | 1053   | 1297   | 1384.3 | 1382.5 | 0.304002281 | 1393.275 | 1279.2   | 114.075 | 1.089176829 | 0.3034   | -1.092 |
| 94255_g_at | 902.7  | 968.1  | 1223   | 1688.8 | 895.1  | 935.6  | 1669.5 | 1740.4 | 0.707287626 | 1195.65  | 1310.15  | 114.5   | 0.912605427 | 0.7552   | 1.078  |
| 94256_at   | 1359   | 1886.9 | 2296.2 | 1892.9 | 1451.5 | 1382.4 | 2778.4 | 2425.9 | 0.722203059 | 1858.75  | 2009.55  | 150.8   | 0.924958324 | 0.824    | 1.05   |
| 94257_at   | 2472.3 | 1491.9 | 2129.4 | 1306.5 | 1361.8 | 1923.2 | 1722.8 | 1582.4 | 0.531670557 | 1850.025 | 1647.55  | 202.475 | 1.122894601 | 0.6044   | -1.095 |
| 94258_at   | 567.2  | 593    | 503.2  | 616.7  | 503.5  | 765.9  | 511.6  | 583.9  | 0.763291253 | 570.025  | 591.225  | 21.2    | 0.964142247 | 0.8249   | 1.025  |
| 94259_at   | 1164.7 | 1370   | 1469.1 | 1601.8 | 1621.5 | 1266.3 | 1550.2 | 1553.6 | 0.457218831 | 1401.4   | 1497.9   | 96.5    | 0.935576474 | 0.4609   | 1.071  |



|            |        |        |        |        |        |        |         |        |             |          |          |         |             |          |        |
|------------|--------|--------|--------|--------|--------|--------|---------|--------|-------------|----------|----------|---------|-------------|----------|--------|
| 94260_at   | 880.1  | 787.8  | 952.2  | 1267.5 | 785.5  | 777.5  | 864.6   | 1063.6 | 0.458314069 | 971.9    | 872.8    | 99.1    | 1.113542621 | 0.4551   | -1.105 |
| 94261_at   | 3160.3 | 3412.9 | 3302.7 | 3494.9 | 3151   | 2971.9 | 3477.7  | 3349.8 | 0.463190397 | 3342.7   | 3237.6   | 105.1   | 1.032462318 | 0.4498   | -1.034 |
| 94262_at   | 673    | 428.5  | 657.8  | 538.5  | 381.8  | 451.9  | 514.3   | 520.4  | 0.166452506 | 574.45   | 467.1    | 107.35  | 1.229822308 | 0.1704   | -1.22  |
| 94263_f_at | 3052.9 | 3530.8 | 3040.6 | 2894.1 | 3463.9 | 2999.3 | 2954.7  | 2886.9 | 0.789043339 | 3129.6   | 3076.2   | 53.4    | 1.017359079 | 0.7845   | 1.017  |
| 94264_at   | 1073.7 | 1008.5 | 977.1  | 881    | 1076.6 | 911.6  | 921.1   | 1025.5 | 0.981490631 | 985.075  | 983.7    | 1.375   | 1.001397784 | 0.9821   | 1.001  |
| 94266_at   | 2412.5 | 2615.1 | 1874.1 | 1744.6 | 2332.8 | 2254.9 | 1828.6  | 1824.6 | 0.700834599 | 2161.575 | 2060.225 | 101.35  | 1.049193656 | 0.7431   | -1.041 |
| 94267_i_at | 2519.7 | 2455.6 | 2347   | 2099.7 | 2750.2 | 2092.1 | 2539.8  | 2598.2 | 0.445236826 | 2355.5   | 2495.075 | 139.575 | 0.944059798 | 0.474    | 1.056  |
| 94268_f_at | 3840.7 | 4370.8 | 3484.4 | 3807.8 | 4483.7 | 4349.8 | 4140.5  | 4447.1 | 0.07326133  | 3875.925 | 4355.275 | 479.35  | 0.889938064 | 0.05399  | 1.127  |
| 94269_at   | 6141.7 | 6568   | 5762.5 | 4357.4 | 6200.9 | 6337.5 | 5023.1  | 4501.8 | 0.78026421  | 5707.4   | 5515.825 | 191.575 | 1.034731885 | 0.7983   | -1.033 |
| 94270_at   | 305    | 410.6  | 375.3  | 308.3  | 717.8  | 663.4  | 506.2   | 601.6  | 0.003933278 | 349.8    | 622.25   | 272.45  | 0.562153475 | 0.001558 | 1.779  |
| 94271_at   | 5.9    | 2.2    | 0.9    | 1.6    | 8      | 3      | 3.8     | 4.5    | 0.214703605 | 2.65     | 4.825    | 2.175   | 0.549222798 | 0.1336   | 2.18   |
| 94272_g_at | 239.1  | 170.5  | 166.6  | 173.6  | 146.8  | 248.2  | 215.7   | 183.8  | 0.701736941 | 187.45   | 198.625  | 11.175  | 0.9437382   | 0.7316   | 1.052  |
| 94273_at   | 1416.8 | 1621.6 | 1710.3 | 1426.3 | 1855.7 | 1646.7 | 1740.4  | 1625.1 | 0.106947379 | 1543.75  | 1716.975 | 173.225 | 0.899110354 | 0.1007   | 1.114  |
| 94274_at   | 791.5  | 918.2  | 1442.6 | 1506.2 | 933.5  | 704.4  | 1013.9  | 893.6  | 0.226275618 | 1164.625 | 886.35   | 278.275 | 1.313956112 | 0.2227   | -1.276 |
| 94275_at   | 1126.7 | 1131.5 | 817.3  | 558.4  | 1042.8 | 1089   | 686.2   | 645.5  | 0.82131482  | 908.475  | 865.875  | 42.6    | 1.049198787 | 0.8719   | -1.037 |
| 94276_at   | 1963.6 | 2014.5 | 2076.3 | 1657.1 | 1663.8 | 1959.1 | 1649.2  | 1679.2 | 0.1638076   | 1927.875 | 1737.825 | 190.05  | 1.109360839 | 0.1655   | -1.108 |
| 94277_at   | 1041.8 | 998.3  | 818.5  | 641.2  | 892.9  | 825.1  | 581.9   | 732.2  | 0.346995739 | 874.95   | 758.025  | 116.925 | 1.15424953  | 0.3764   | -1.148 |
| 94278_at   | 264.4  | 367.2  | 357.1  | 303.2  | 310.8  | 460    | 351.3   | 460.3  | 0.167732769 | 322.975  | 395.6    | 72.625  | 0.816418099 | 0.1659   | 1.218  |
| 94279_at   | 136.5  | 75     | 91.9   | 90.7   | 96.9   | 168.5  | 101.1   | 108.5  | 0.381925258 | 98.525   | 118.75   | 20.225  | 0.829684211 | 0.3408   | 1.203  |
| 94281_at   | 1490.3 | 1327.5 | 1303.1 | 1263.2 | 1518.1 | 1485   | 1205.6  | 1191.4 | 0.970009983 | 1346.025 | 1350.025 | 4       | 0.997037092 | 0.9854   | 1.001  |
| 94282_at   | 1381.4 | 1352.6 | 1288.9 | 1290   | 1234   | 1450.6 | 1595.8  | 1153.8 | 0.786987807 | 1328.225 | 1358.55  | 30.325  | 0.977678407 | 0.8524   | 1.015  |
| 94283_at   | 15.7   | 17     | 8      | 12.1   | 7      | 26.3   | 7.3     | 6.2    | 0.790211045 | 13.2     | 11.7     | 1.5     | 1.128205128 | 0.485    | -1.327 |
| 94284_at   | 1479.4 | 1459.3 | 1581.6 | 1133.3 | 1350.9 | 1531.7 | 1270.7  | 1310.9 | 0.692807308 | 1413.4   | 1366.05  | 47.35   | 1.034661982 | 0.7418   | -1.029 |
| 94285_at   | 208.9  | 249.1  | 218.9  | 212.7  | 665.6  | 748.5  | 399.2   | 457.5  | 0.02455689  | 222.4    | 567.7    | 345.3   | 0.391756209 | 0.001088 | 2.476  |
| 94286_at   | 903.8  | 1271   | 1324   | 1108.7 | 1277.2 | 1088.6 | 1308.1  | 1089.3 | 0.741139683 | 1151.875 | 1190.8   | 38.925  | 0.967311891 | 0.6994   | 1.041  |
| 94288_at   | 400.9  | 359.2  | 284    | 363    | 292.7  | 393.4  | 483.9   | 340.2  | 0.612858685 | 351.775  | 377.55   | 25.775  | 0.931730897 | 0.6548   | 1.063  |
| 94289_r_at | 6167.6 | 6320.7 | 5532.8 | 4096.9 | 6668.4 | 6111.9 | 6541.3  | 5633.4 | 0.26961244  | 5529.5   | 6238.75  | 709.25  | 0.886315368 | 0.26     | 1.142  |
| 94290_at   | 508.3  | 590.1  | 624.5  | 600.4  | 559.6  | 747.1  | 506.5   | 607.9  | 0.690581729 | 580.825  | 605.275  | 24.45   | 0.959605138 | 0.7319   | 1.034  |
| 94291_at   | 125.1  | 75.7   | 53.5   | 88.4   | 76.2   | 130.2  | 79.5    | 78     | 0.799083051 | 85.675   | 90.975   | 5.3     | 0.941742237 | 0.7292   | 1.082  |
| 94292_at   | 880.2  | 1481.1 | 2436   | 1786.6 | 1511.2 | 1120.3 | 2079.4  | 1366.6 | 0.753829241 | 1645.975 | 1519.375 | 126.6   | 1.083323735 | 0.8741   | -1.042 |
| 94294_at   | 4578.5 | 2965.6 | 2800.7 | 2666.5 | 3444.6 | 4262.5 | 2465.3  | 3189.2 | 0.885106885 | 3252.825 | 3340.4   | 87.575  | 0.97378308  | 0.8533   | 1.033  |
| 94295_at   | 1967.4 | 2043.6 | 2042.2 | 2606.1 | 2061.8 | 1791.1 | 2273.6  | 2471   | 0.943158274 | 2164.825 | 2149.375 | 15.45   | 1.007188136 | 0.9374   | 1.008  |
| 94296_s_at | 1054.1 | 852.9  | 1163.6 | 1256.7 | 649.6  | 968.7  | 1181.7  | 969.7  | 0.359463467 | 1081.825 | 942.425  | 139.4   | 1.14791628  | 0.3586   | -1.162 |
| 94297_at   | 1314.5 | 1332.7 | 1623.1 | 1694.2 | 1553   | 1385.1 | 1774.4  | 1723.5 | 0.406165739 | 1491.125 | 1609     | 117.875 | 0.926740211 | 0.4026   | 1.081  |
| 94298_at   | 809.4  | 668.8  | 512.3  | 462.9  | 615.7  | 659.2  | 518.4   | 517.2  | 0.699644658 | 613.35   | 577.625  | 35.725  | 1.061848085 | 0.7794   | -1.042 |
| 94299_at   | 448.4  | 376.8  | 658.3  | 503.6  | 408.4  | 349.3  | 486.8   | 479.5  | 0.381318661 | 496.775  | 431      | 65.775  | 1.152610209 | 0.3911   | -1.139 |
| 94300_f_at | 338    | 381.3  | 461.3  | 504.6  | 493.4  | 498.4  | 603.3   | 475    | 0.092826877 | 421.3    | 517.525  | 96.225  | 0.814066953 | 0.08915  | 1.238  |
| 94301_at   | 2009.2 | 2049.2 | 1688.7 | 1489.5 | 1809.6 | 2114.4 | 1718.7  | 1559.7 | 0.963150461 | 1809.15  | 1800.6   | 8.55    | 1.004748417 | 0.9812   | 1.002  |
| 94302_at   | 3962.5 | 3866   | 3274.4 | 2917.7 | 3489.3 | 3131.8 | 2902.6  | 3010.5 | 0.246300091 | 3505.15  | 3133.55  | 371.6   | 1.118587544 | 0.2431   | -1.113 |
| 94303_at   | 1362.2 | 1274   | 2031.5 | 2395   | 1274.1 | 1247.8 | 1738    | 1563   | 0.350026531 | 1765.675 | 1455.725 | 309.95  | 1.212917962 | 0.37     | -1.183 |
| 94304_at   | 4022.1 | 4253   | 4068.6 | 2721.8 | 3504.7 | 3965.7 | 3677.9  | 3473.3 | 0.780339676 | 3766.375 | 3655.4   | 110.975 | 1.030359195 | 0.8859   | 1.016  |
| 94305_at   | 5169.4 | 6364.6 | 8319.1 | 9695.8 | 5341.2 | 6009.1 | 10954.1 | 9415.5 | 0.758581897 | 7387.225 | 7929.975 | 542.75  | 0.931557161 | 0.8121   | 1.057  |
| 94307_at   | 265.8  | 281.6  | 289.5  | 343.8  | 250.1  | 242.4  | 277     | 357.7  | 0.686891197 | 295.175  | 281.8    | 13.375  | 1.04746274  | 0.6232   | -1.055 |
| 94308_at   | 983.3  | 1028.5 | 1127.9 | 875.5  | 1062.9 | 927    | 867.9   | 1091.5 | 0.833244441 | 1003.8   | 987.325  | 16.475  | 1.016686501 | 0.8313   | 1.017  |
| 94309_g_at | 1794   | 1927.5 | 2115.4 | 1986   | 1662.4 | 1663.5 | 1705.2  | 2100.2 | 0.226114624 | 1955.725 | 1782.825 | 172.9   | 1.096980915 | 0.1977   | -1.101 |
| 94312_at   | 791.4  | 768.5  | 658.8  | 575.7  | 907.6  | 1015.1 | 638.7   | 759.2  | 0.232171075 | 698.6    | 830.15   | 131.55  | 0.841534662 | 0.2365   | 1.18   |
| 94313_at   | 1292.4 | 1619.2 | 1316.9 | 1354   | 1263.2 | 1090.9 | 1116.7  | 1180.7 | 0.045939913 | 1395.625 | 1162.875 | 232.75  | 1.200150489 | 0.02597  | -1.197 |
| 94316_at   | 339.9  | 193.1  | 218.3  | 270.2  | 283.7  | 348.3  | 217.4   | 190.5  | 0.926760023 | 255.375  | 259.975  | 4.6     | 0.982305991 | 0.9419   | -1.014 |
| 94317_at   | 16.9   | 24.5   | 12.4   | 13.9   | 11     | 18.5   | 47.6    | 13     | 0.567922345 | 16.925   | 22.525   | 5.6     | 0.751387347 | 0.7062   | 1.153  |
| 94318_at   | 4.9    | 2.9    | 3.6    | 3.1    | 2.6    | 4.7    | 3.3     | 8.4    | 0.460538529 | 3.625    | 4.75     | 1.125   | 0.763157895 | 0.5333   | 1.205  |
| 94319_at   | 3040.1 | 3401.2 | 3525.7 | 3559.5 | 3528.3 | 3275.5 | 4052.7  | 3581.1 | 0.304079399 | 3381.625 | 3609.4   | 227.775 | 0.936893944 | 0.3041   | 1.066  |
| 94321_at   | 205.8  | 253.7  | 270.9  | 307.2  | 380.6  | 232.6  | 268.6   | 297.8  | 0.390255896 | 259.4    | 294.9    | 35.5    | 0.87962021  | 0.3955   | 1.13   |
| 94322_at   | 1793.4 | 1114.6 | 1716.5 | 1402.9 | 1383.6 | 1792   | 1701    | 1683.1 | 0.492588317 | 1506.85  | 1639.925 | 133.075 | 0.918852996 | 0.4591   | 1.102  |
| 94323_at   | 3426.2 | 4492.3 | 4337   | 3834.5 | 4201.5 | 4463   | 4395.9  | 4227.9 | 0.309926304 | 4022.5   | 4322.075 | 299.575 | 0.930687228 | 0.27     | 1.08   |
| 94324_f_at | 798.3  | 391.2  | 373.8  | 418.9  | 520    | 450    | 413.3   | 567.2  | 0.944834712 | 495.55   | 487.625  | 7.925   | 1.016252243 | 0.8856   | 1.029  |
| 94325_at   | 1925.9 | 1447.6 | 2258.7 | 2437.3 | 2189.6 | 2505.7 | 3182.1  | 2655.9 | 0.086250873 | 2017.375 | 2633.325 | 615.95  | 0.766094197 | 0.09377  | 1.318  |



|            |        |        |        |        |        |        |        |        |             |          |          |         |             |          |        |
|------------|--------|--------|--------|--------|--------|--------|--------|--------|-------------|----------|----------|---------|-------------|----------|--------|
| 94326_r_at | 433.2  | 337.3  | 274.7  | 257.1  | 238.3  | 439    | 344.8  | 292.8  | 0.958722336 | 325.575  | 328.725  | 3.15    | 0.990417522 | 0.9743   | 1.006  |
| 94327_at   | 1294.9 | 1171.1 | 873.5  | 914.6  | 996.9  | 1017.2 | 910.4  | 1042.1 | 0.537872905 | 1063.525 | 991.65   | 71.875  | 1.07248021  | 0.5841   | -1.059 |
| 94330_at   | 530.7  | 601.8  | 472.1  | 456.1  | 380.3  | 480.5  | 357.9  | 374    | 0.036186525 | 515.175  | 398.175  | 117     | 1.293840648 | 0.02976  | -1.295 |
| 94331_at   | 409.8  | 476.2  | 508.2  | 466.5  | 477.2  | 425.7  | 455.7  | 442.4  | 0.550984558 | 465.175  | 450.25   | 14.925  | 1.033148251 | 0.574    | -1.031 |
| 94332_at   | 84.9   | 79.7   | 174.1  | 159.7  | 144.4  | 98.6   | 140.5  | 198.4  | 0.539300961 | 124.6    | 145.475  | 20.875  | 0.856504554 | 0.4841   | 1.205  |
| 94334_f_at | 63.7   | 85.9   | 93.2   | 111.8  | 102.4  | 79     | 43.7   | 81.7   | 0.477126202 | 88.65    | 76.7     | 11.95   | 1.155801825 | 0.4623   | -1.185 |
| 94335_r_at | 78.9   | 86.1   | 73.4   | 142.7  | 92.5   | 101.2  | 53.8   | 96.1   | 0.647455746 | 95.275   | 85.9     | 9.375   | 1.109138533 | 0.662    | -1.102 |
| 94336_at   | 460.4  | 490.2  | 467.1  | 433.3  | 509.7  | 609.6  | 290.2  | 460    | 0.94965024  | 462.75   | 467.375  | 4.625   | 0.990104306 | 0.8853   | -1.024 |
| 94337_at   | 22.5   | 21     | 24.4   | 29.5   | 25.8   | 13.6   | 21.8   | 16.6   | 0.192563559 | 24.35    | 19.45    | 4.9     | 1.251928021 | 0.1719   | -1.28  |
| 94338_g_at | 386.7  | 555    | 444    | 368.5  | 528.6  | 453.8  | 430.7  | 478.7  | 0.500931947 | 438.55   | 472.95   | 34.4    | 0.927265039 | 0.4318   | 1.089  |
| 94339_at   | 216.2  | 268.6  | 303.7  | 247.8  | 192.8  | 148.1  | 251.4  | 222.1  | 0.10282058  | 259.075  | 203.6    | 55.475  | 1.27247053  | 0.1092   | -1.287 |
| 94340_at   | 441.5  | 374.9  | 726.8  | 580.7  | 580    | 447.4  | 580.5  | 582.6  | 0.854013052 | 530.975  | 547.625  | 16.65   | 0.969595983 | 0.7344   | 1.059  |
| 94341_at   | 908.1  | 720.1  | 925.7  | 1217.7 | 883.9  | 887    | 872.5  | 1055.8 | 0.879003406 | 942.9    | 924.8    | 18.1    | 1.019571799 | 0.9666   | 1.005  |
| 94343_at   | 588.2  | 598.1  | 714.8  | 621.7  | 600.7  | 606.7  | 762.3  | 482.7  | 0.796331009 | 630.7    | 613.1    | 17.6    | 1.028706573 | 0.7227   | -1.039 |
| 94344_at   | 113    | 115.6  | 88     | 101    | 87.2   | 139.8  | 56.1   | 56.2   | 0.403649579 | 104.4    | 84.825   | 19.575  | 1.230769231 | 0.268    | -1.318 |
| 94345_at   | 2125.9 | 1982.9 | 2085.8 | 1897.7 | 1798.3 | 1803.8 | 2336.7 | 1970.8 | 0.754634206 | 2023.075 | 1977.4   | 45.675  | 1.023098513 | 0.6917   | -1.028 |
| 94346_at   | 612.9  | 602.2  | 734    | 759.2  | 628.8  | 613.7  | 671.3  | 747.1  | 0.822451857 | 677.075  | 665.225  | 11.85   | 1.017813522 | 0.8448   | -1.015 |
| 94347_i_at | 220.1  | 220.6  | 237.4  | 213.8  | 256.2  | 224.1  | 195.7  | 259.7  | 0.531504051 | 222.975  | 233.925  | 10.95   | 0.953190125 | 0.5694   | 1.043  |
| 94348_f_at | 999.1  | 906.2  | 833.8  | 834.4  | 1064.3 | 888.7  | 990.9  | 938.5  | 0.204430305 | 893.375  | 970.6    | 77.225  | 0.920435813 | 0.1976   | 1.087  |
| 94349_at   | 119.7  | 84.5   | 81.1   | 108.6  | 112.6  | 158.4  | 100.3  | 123.7  | 0.160513233 | 98.475   | 123.75   | 25.275  | 0.795757576 | 0.1448   | 1.255  |
| 94350_f_at | 77.9   | 59.2   | 94.4   | 93.2   | 126.6  | 112.8  | 104.8  | 100    | 0.028571672 | 81.175   | 111.05   | 29.875  | 0.730977037 | 0.03498  | 1.386  |
| 94351_r_at | 66.5   | 129.7  | 82     | 119.5  | 180.8  | 151    | 138.5  | 170    | 0.018576158 | 99.425   | 160.075  | 60.65   | 0.621115102 | 0.02367  | 1.661  |
| 94352_at   | 690.8  | 708.4  | 736.5  | 804    | 922.9  | 726.7  | 663.8  | 888.7  | 0.385711596 | 734.925  | 800.525  | 65.6    | 0.918053777 | 0.3998   | 1.081  |
| 94353_at   | 94.5   | 158.8  | 250.5  | 294.8  | 223.5  | 123    | 158.7  | 186.4  | 0.618131806 | 199.65   | 172.9    | 26.75   | 1.154713707 | 0.7945   | -1.081 |
| 94354_at   | 766.1  | 948.8  | 1219.5 | 1591   | 1476.9 | 1126.7 | 1866.3 | 1641.3 | 0.147038432 | 1131.35  | 1527.8   | 396.45  | 0.740509229 | 0.1435   | 1.379  |
| 94355_at   | 31.2   | 28.9   | 17.3   | 35.9   | 30.5   | 30     | 49.6   | 52.9   | 0.146478691 | 28.325   | 40.75    | 12.425  | 0.695092025 | 0.1501   | 1.438  |
| 94356_at   | 366.7  | 368.1  | 415.7  | 374.4  | 478.9  | 445.9  | 469.1  | 472.5  | 0.001529609 | 381.225  | 466.6    | 85.375  | 0.817027432 | 0.000915 | 1.225  |
| 94357_at   | 19.4   | 19.7   | 18.8   | 23.7   | 21.2   | 29.8   | 21.2   | 24.5   | 0.168320854 | 20.4     | 24.175   | 3.775   | 0.843846949 | 0.1379   | 1.178  |
| 94358_at   | 101.1  | 139.1  | 97.5   | 116.8  | 178    | 58.5   | 128.3  | 136.1  | 0.685205758 | 113.625  | 125.225  | 11.6    | 0.90736674  | 0.9026   | 1.033  |
| 94359_at   | 975.7  | 821.4  | 889.5  | 1012.5 | 795.7  | 902.5  | 857.9  | 837.6  | 0.182179113 | 924.775  | 848.425  | 76.35   | 1.089990276 | 0.1705   | -1.088 |
| 94360_at   | 1153.9 | 1131.7 | 1189.7 | 1212.3 | 1102.4 | 967.1  | 1134.9 | 1090.7 | 0.069309796 | 1171.9   | 1073.775 | 98.125  | 1.091383204 | 0.06027  | -1.093 |
| 94361_at   | 720.6  | 616    | 807    | 705.1  | 556.6  | 640.8  | 944.7  | 653.1  | 0.89261429  | 712.175  | 698.8    | 13.375  | 1.019139954 | 0.7932   | -1.035 |
| 94362_at   | 2312.3 | 1858.6 | 2107.9 | 2046.5 | 1912.1 | 1954.5 | 2150   | 1851   | 0.357478833 | 2081.325 | 1966.9   | 114.425 | 1.058175301 | 0.3579   | -1.057 |
| 94363_at   | 334    | 401.5  | 404.4  | 446.8  | 455.3  | 394.1  | 401.6  | 472.7  | 0.303999916 | 396.675  | 430.925  | 34.25   | 0.920519812 | 0.3033   | 1.089  |
| 94364_at   | 783.2  | 777.7  | 828.3  | 1094.8 | 578.5  | 573.1  | 872.5  | 894.3  | 0.272031648 | 871      | 729.6    | 141.4   | 1.193804825 | 0.2467   | -1.209 |
| 94365_at   | 1349.9 | 967.2  | 1091.1 | 837.7  | 1078.9 | 1113.6 | 879.3  | 909.4  | 0.618558401 | 1061.475 | 995.3    | 66.175  | 1.066487491 | 0.6601   | -1.056 |
| 94366_at   | 454.4  | 510.9  | 378.1  | 302    | 660.6  | 414.2  | 286    | 353.5  | 0.861473865 | 411.35   | 428.575  | 17.225  | 0.959808668 | 0.9614   | 1.011  |
| 94367_at   | 888.5  | 832.4  | 869.4  | 841.6  | 685.3  | 738.8  | 750.2  | 764.2  | 0.001595768 | 857.975  | 734.625  | 123.35  | 1.167908797 | 0.001486 | -1.169 |
| 94368_at   | 281.7  | 258    | 211.1  | 241.1  | 273.3  | 227.6  | 259.9  | 227.5  | 0.963538325 | 247.975  | 247.075  | 0.9     | 1.003642619 | 0.9856   | -1.001 |
| 94369_at   | 757.7  | 819.9  | 1000.3 | 991.7  | 889.9  | 819.5  | 1073.5 | 839.1  | 0.881548372 | 892.4    | 905.5    | 13.1    | 0.985532855 | 0.869    | 1.016  |
| 94370_at   | 6      | 9.4    | 5.4    | 5.1    | 3.8    | 10.3   | 10.8   | 7.3    | 0.443788019 | 6.475    | 8.05     | 1.575   | 0.804347826 | 0.5533   | 1.189  |
| 94371_at   | 221.6  | 154.7  | 290.7  | 344.2  | 154.2  | 389.6  | 270.3  | 301.2  | 0.697621869 | 252.8    | 278.825  | 26.025  | 0.906661885 | 0.7465   | 1.093  |
| 94372_at   | 630.8  | 642.2  | 478.4  | 490.1  | 497.9  | 517.2  | 520.2  | 499.5  | 0.326617403 | 560.375  | 508.7    | 51.675  | 1.101582465 | 0.3152   | -1.092 |
| 94373_at   | 690.6  | 648.9  | 667    | 687.5  | 579.6  | 828.2  | 732.4  | 676.3  | 0.600939204 | 673.5    | 704.125  | 30.625  | 0.956506302 | 0.6491   | 1.037  |
| 94374_at   | 446.1  | 383.3  | 487.7  | 613.7  | 400.2  | 449.2  | 627.6  | 586.6  | 0.664869761 | 482.7    | 515.9    | 33.2    | 0.935646443 | 0.6741   | 1.066  |
| 94375_at   | 1293.7 | 1013.6 | 1358.8 | 1816.1 | 1059   | 995.8  | 1427.9 | 1407.5 | 0.493567021 | 1370.55  | 1222.55  | 148     | 1.121058443 | 0.513    | -1.112 |
| 94376_s_at | 317.9  | 286.7  | 345.4  | 323.5  | 344.1  | 320.2  | 320.8  | 325.7  | 0.521224541 | 318.375  | 327.7    | 9.325   | 0.971544095 | 0.495    | 1.031  |
| 94377_at   | 314.3  | 404.7  | 314    | 242.7  | 393.9  | 322.1  | 355.3  | 356.7  | 0.351465188 | 318.925  | 357      | 38.075  | 0.893347339 | 0.3022   | 1.135  |
| 94378_at   | 278    | 229.8  | 170.9  | 196.1  | 226.9  | 308.3  | 174.9  | 283.2  | 0.46416451  | 218.7    | 248.325  | 29.625  | 0.880700695 | 0.4925   | 1.128  |
| 94379_at   | 101.4  | 77.9   | 145.3  | 130.8  | 49.9   | 88.2   | 164.1  | 143.8  | 0.940914487 | 113.85   | 111.5    | 2.35    | 1.021076233 | 0.772    | -1.097 |
| 94380_at   | 536.7  | 399.5  | 480.4  | 420    | 439.5  | 483.1  | 513.5  | 405.4  | 0.976093619 | 459.15   | 460.375  | 1.225   | 0.997339126 | 0.9519   | 1.005  |
| 94381_at   | 804.5  | 599.9  | 574.9  | 554.5  | 544.9  | 571    | 466.5  | 461.1  | 0.123128489 | 633.45   | 510.875  | 122.575 | 1.23993149  | 0.08452  | -1.231 |
| 94382_at   | 346    | 377.1  | 445.3  | 351.3  | 363.7  | 397.7  | 441    | 399    | 0.493096835 | 379.925  | 400.35   | 20.425  | 0.948982141 | 0.4605   | 1.057  |
| 94383_at   | 49.2   | 94.5   | 68.9   | 67.7   | 84.2   | 80.6   | 71.9   | 62.7   | 0.669617488 | 70.075   | 74.85    | 4.775   | 0.936205745 | 0.5852   | 1.09   |
| 94384_at   | 331.2  | 250.4  | 346.2  | 320.8  | 222.9  | 316.5  | 315.2  | 327.6  | 0.626288309 | 312.15   | 295.55   | 16.6    | 1.056166469 | 0.6323   | -1.06  |
| 94385_at   | 119.4  | 131.7  | 91.7   | 117.9  | 121    | 170.6  | 117.3  | 135.7  | 0.21150247  | 115.175  | 136.15   | 20.975  | 0.845941976 | 0.2002   | 1.179  |



|            |        |        |        |        |        |        |        |        |             |          |          |         |             |          |        |
|------------|--------|--------|--------|--------|--------|--------|--------|--------|-------------|----------|----------|---------|-------------|----------|--------|
| 94386_at   | 1254.4 | 1235   | 1206.2 | 1601.9 | 1378.3 | 1164.9 | 1772.8 | 1739.3 | 0.324337748 | 1324.375 | 1513.825 | 189.45  | 0.874853434 | 0.3358   | 1.134  |
| 94387_at   | 485.4  | 506.4  | 539    | 582.4  | 673    | 495.8  | 436.4  | 571.2  | 0.789135665 | 528.3    | 544.1    | 15.8    | 0.97096122  | 0.8593   | 1.019  |
| 94388_at   | 346.1  | 300    | 410.5  | 284    | 310.1  | 378.4  | 249.7  | 217.7  | 0.349989649 | 335.15   | 288.975  | 46.175  | 1.159788909 | 0.3172   | -1.174 |
| 94389_at   | 53     | 52.4   | 19.1   | 30.1   | 44     | 41.4   | 23.2   | 24.3   | 0.61197156  | 38.65    | 33.225   | 5.425   | 1.163280662 | 0.7254   | -1.117 |
| 94390_at   | 337.2  | 370.5  | 607.4  | 633.2  | 541.2  | 551.9  | 638.1  | 617.9  | 0.291324694 | 487.075  | 587.275  | 100.2   | 0.829381465 | 0.2324   | 1.251  |
| 94391_at   | 12.8   | 2.7    | 5.3    | 2.6    | 19.8   | 29     | 22.6   | 22.7   | 0.001425787 | 5.85     | 23.525   | 17.675  | 0.248671626 | 0.005692 | 4.97   |
| 94392_f_at | 135.7  | 115.8  | 100.4  | 109.5  | 88.3   | 143.6  | 111.2  | 104    | 0.806158498 | 115.35   | 111.775  | 3.575   | 1.031983896 | 0.7441   | -1.042 |
| 94393_r_at | 822.2  | 690.7  | 810.6  | 952.2  | 272    | 178.2  | 427.5  | 309    | 0.000415604 | 818.925  | 296.675  | 522.25  | 2.760343811 | 0.001535 | -2.876 |
| 94394_at   | 269.3  | 346.4  | 268.1  | 343.1  | 272.8  | 350.3  | 310.6  | 328.6  | 0.758649989 | 306.725  | 315.575  | 8.85    | 0.971955953 | 0.7327   | 1.033  |
| 94395_at   | 327.3  | 240.6  | 315.4  | 435.2  | 377.4  | 339.7  | 475.4  | 438    | 0.175327864 | 329.625  | 407.625  | 78      | 0.808647654 | 0.1642   | 1.253  |
| 94396_at   | 825.2  | 947.8  | 869.7  | 867.1  | 976.3  | 808.6  | 851.5  | 1077.9 | 0.48351976  | 877.45   | 928.575  | 51.125  | 0.944942519 | 0.4984   | 1.053  |
| 94397_at   | 381.1  | 439.2  | 417.1  | 604.8  | 399.9  | 516.5  | 421    | 567.6  | 0.813204276 | 460.55   | 476.25   | 15.7    | 0.967034121 | 0.7749   | 1.04   |
| 94398_s_at | 599.9  | 548.7  | 492.4  | 583.3  | 621.1  | 551    | 574.5  | 661.5  | 0.227688315 | 556.075  | 602.025  | 45.95   | 0.923674266 | 0.2306   | 1.083  |
| 94399_at   | 602    | 447.3  | 512.6  | 512.1  | 514.1  | 521    | 516.4  | 527.8  | 0.969454708 | 518.5    | 519.825  | 1.325   | 0.997451065 | 0.8991   | 1.008  |
| 94400_at   | 858.6  | 630.6  | 553.3  | 596.2  | 583.9  | 732.1  | 653.6  | 651.7  | 0.956204452 | 659.675  | 655.325  | 4.35    | 1.006637928 | 0.9652   | 1.005  |
| 94401_s_at | 15.1   | 13.5   | 11.2   | 17.7   | 9.7    | 31.2   | 19.6   | 10.1   | 0.571358809 | 14.375   | 17.65    | 3.275   | 0.814447592 | 0.7491   | 1.105  |
| 94402_r_at | 4.2    | 1.7    | 3.2    | 1.1    | 3.9    | 18.3   | 3.2    | 6.1    | 0.229054488 | 2.55     | 7.875    | 5.325   | 0.323809524 | 0.08916  | 2.743  |
| 94403_at   | 760    | 741    | 633.3  | 755.2  | 705    | 645.4  | 723.6  | 786.1  | 0.865835237 | 722.375  | 715.025  | 7.35    | 1.010279361 | 0.8726   | 1.01   |
| 94404_at   | 207.2  | 209.2  | 213.4  | 159.4  | 248.6  | 240.3  | 118.6  | 135.2  | 0.766350521 | 197.3    | 185.675  | 11.625  | 1.062609398 | 0.6149   | -1.114 |
| 94405_at   | 44.3   | 99.9   | 90.2   | 103.7  | 72.7   | 131    | 65.2   | 131.3  | 0.520254558 | 84.525   | 100.05   | 15.525  | 0.844827586 | 0.56     | 1.184  |
| 94406_at   | 585.4  | 561.6  | 627.8  | 516.4  | 667.5  | 520    | 637    | 616.3  | 0.382818309 | 572.8    | 610.2    | 37.4    | 0.93870862  | 0.4017   | 1.063  |
| 94407_at   | 346.8  | 258.6  | 199.6  | 293.1  | 266.9  | 397.6  | 280.9  | 267.7  | 0.539329734 | 274.525  | 303.275  | 28.75   | 0.90520155  | 0.5128   | 1.111  |
| 94408_at   | 855.7  | 976.4  | 1333   | 1326.3 | 1072.9 | 1090.4 | 1009.9 | 1074.2 | 0.653235851 | 1122.85  | 1061.85  | 61      | 1.057446909 | 0.7481   | -1.039 |
| 94409_at   | 368.1  | 353.3  | 289.4  | 315.4  | 386.4  | 383    | 309.8  | 316.9  | 0.546749859 | 331.55   | 349.025  | 17.475  | 0.949931953 | 0.5544   | 1.052  |
| 94410_f_at | 1893.6 | 1827.3 | 1466.7 | 1436.3 | 1828.5 | 1723.5 | 1267.9 | 1536.1 | 0.708992215 | 1655.975 | 1589     | 66.975  | 1.04214915  | 0.7047   | -1.044 |
| 94411_at   | 122.6  | 76.3   | 98.7   | 89.4   | 79.1   | 99.5   | 108.3  | 64.7   | 0.547175141 | 96.75    | 87.9     | 8.85    | 1.100682594 | 0.5342   | -1.106 |
| 94412_at   | 1036.1 | 864.7  | 910.1  | 975.8  | 765.2  | 786.4  | 895.4  | 825.4  | 0.036910363 | 946.675  | 818.1    | 128.575 | 1.157162939 | 0.0324   | -1.157 |
| 94413_at   | 725.9  | 795.9  | 1096.3 | 1249   | 845    | 739.5  | 1012.5 | 1161   | 0.866241618 | 966.775  | 939.5    | 27.275  | 1.0290314   | 0.9129   | -1.019 |
| 94414_at   | 33.3   | 17.6   | 26.8   | 69.2   | 62.4   | 70.2   | 29.6   | 75.9   | 0.187623407 | 36.725   | 59.525   | 22.8    | 0.616967661 | 0.1755   | 1.736  |
| 94415_at   | 639.3  | 889    | 872.4  | 713.6  | 812.9  | 538.8  | 670.1  | 957.7  | 0.769075762 | 778.575  | 744.875  | 33.7    | 1.04524249  | 0.7099   | -1.059 |
| 94416_at   | 647.8  | 581.7  | 787.8  | 634.5  | 616.9  | 729.6  | 696.8  | 561.1  | 0.845707146 | 662.95   | 651.1    | 11.85   | 1.018199969 | 0.852    | 1.017  |
| 94417_at   | 219.6  | 192.9  | 245.3  | 194.8  | 261.5  | 190.3  | 219.3  | 233.1  | 0.528736273 | 213.15   | 226.05   | 12.9    | 0.942932979 | 0.5366   | 1.059  |
| 94418_at   | 237.7  | 137.7  | 224    | 255.5  | 222    | 251.4  | 265.9  | 230.7  | 0.363909674 | 213.725  | 242.5    | 28.775  | 0.881340206 | 0.3414   | 1.163  |
| 94419_at   | 260.4  | 207.6  | 288.5  | 215.6  | 173.6  | 264.3  | 246.5  | 253.7  | 0.77267744  | 243.025  | 234.525  | 8.5     | 1.036243471 | 0.7617   | -1.04  |
| 94420_f_at | 804.6  | 975.1  | 966.9  | 1181.6 | 1251.1 | 1057.1 | 834.2  | 1136   | 0.483336182 | 982.05   | 1069.6   | 87.55   | 0.918146971 | 0.4998   | 1.087  |
| 94421_r_at | 9.8    | 3      | 5.5    | 9      | 8.6    | 5.1    | 3.5    | 8.7    | 0.869926957 | 6.825    | 6.475    | 0.35    | 1.054054054 | 0.9455   | -1.025 |
| 94422_at   | 285.5  | 263.3  | 290.4  | 371.7  | 305.1  | 204.6  | 338.6  | 442.9  | 0.730199882 | 302.725  | 322.8    | 20.075  | 0.937809789 | 0.8469   | 1.036  |
| 94423_at   | 99.2   | 151.4  | 169.4  | 156.7  | 128.7  | 132.5  | 53.1   | 90     | 0.127240691 | 144.175  | 101.075  | 43.1    | 1.426416028 | 0.1559   | -1.487 |
| 94424_at   | 188.9  | 199.4  | 242    | 318.8  | 252.1  | 157.6  | 259.8  | 281    | 0.993343565 | 237.275  | 237.625  | 0.35    | 0.998527091 | 0.9975   | 1.001  |
| 94425_at   | 127.5  | 106.2  | 97.8   | 97.3   | 121    | 149.8  | 124.1  | 149.8  | 0.034376867 | 107.2    | 136.175  | 28.975  | 0.787222324 | 0.03112  | 1.271  |
| 94426_at   | 1613.4 | 1544.4 | 1437.4 | 1465.6 | 1452.2 | 1661.2 | 1582.9 | 1550.4 | 0.459524936 | 1515.2   | 1561.675 | 46.475  | 0.970240287 | 0.4611   | 1.031  |
| 94427_at   | 920.2  | 873.3  | 1007.7 | 910.8  | 900.9  | 906    | 1145.6 | 1067.3 | 0.31168508  | 928      | 1004.95  | 76.95   | 0.923429026 | 0.304    | 1.079  |
| 94428_at   | 563.9  | 547.5  | 550.5  | 603.9  | 621.4  | 598.1  | 680.4  | 666.8  | 0.021285444 | 566.45   | 641.675  | 75.225  | 0.882767756 | 0.01637  | 1.132  |
| 94429_at   | 156.1  | 117.6  | 124.2  | 117.3  | 94     | 121.6  | 94.2   | 103    | 0.068875541 | 128.8    | 103.2    | 25.6    | 1.248062016 | 0.05141  | -1.246 |
| 94430_at   | 235.5  | 165.8  | 335.2  | 329.3  | 234.6  | 211.7  | 257.7  | 312.3  | 0.7994471   | 266.45   | 254.075  | 12.375  | 1.048706091 | 0.9226   | -1.019 |
| 94431_at   | 134.1  | 135.2  | 249.3  | 234.6  | 62.6   | 131.8  | 283.4  | 205.4  | 0.770060719 | 188.3    | 170.8    | 17.5    | 1.102459016 | 0.61     | -1.219 |
| 94432_at   | 787.6  | 638.5  | 965.8  | 1012.4 | 797    | 837.5  | 1008.7 | 1055.5 | 0.518063493 | 851.075  | 924.675  | 73.6    | 0.920404466 | 0.4926   | 1.096  |
| 94433_at   | 1175.9 | 1312.7 | 1702.8 | 1755.5 | 1620.9 | 1248.5 | 1620.9 | 1500.4 | 0.950539703 | 1486.725 | 1497.675 | 10.95   | 0.992688667 | 0.8942   | 1.016  |
| 94434_at   | 342.6  | 344.2  | 305.7  | 291    | 282.8  | 282.1  | 309.8  | 320.3  | 0.232375077 | 320.875  | 298.75   | 22.125  | 1.074058577 | 0.2309   | -1.073 |
| 94435_at   | 325.7  | 418.2  | 606.7  | 581.7  | 546.8  | 487.4  | 616.9  | 560.3  | 0.389298788 | 483.075  | 552.85   | 69.775  | 0.873790359 | 0.3337   | 1.176  |
| 94438_at   | 806.9  | 728    | 826.8  | 768.1  | 942    | 885.5  | 1094.6 | 901.3  | 0.027754537 | 782.45   | 955.85   | 173.4   | 0.818590783 | 0.01215  | 1.219  |
| 94439_at   | 1067.2 | 948.1  | 1174.1 | 1300.1 | 1361.5 | 1141.7 | 1504.7 | 1371.1 | 0.081264603 | 1122.375 | 1344.75  | 222.375 | 0.83463469  | 0.08511  | 1.2    |
| 94440_at   | 153.6  | 143.1  | 157.4  | 161.1  | 139.8  | 197.1  | 146.9  | 167.3  | 0.544495991 | 153.8    | 162.775  | 8.975   | 0.94486254  | 0.5691   | 1.05   |
| 94441_at   | 102.8  | 115.3  | 173.2  | 222    | 125.6  | 93.4   | 108.1  | 129.5  | 0.253629475 | 153.325  | 114.15   | 39.175  | 1.343188787 | 0.2365   | -1.291 |
| 94442_s_at | 173.8  | 189.9  | 227.4  | 195.7  | 198.7  | 281.9  | 159.9  | 167.8  | 0.86693508  | 196.7    | 202.075  | 5.375   | 0.973400965 | 0.9686   | 1.006  |
| 94445_at   | 2081.3 | 2263.9 | 2196.2 | 2130.1 | 2332.6 | 2488   | 2432.2 | 2249.3 | 0.022280772 | 2167.875 | 2375.525 | 207.65  | 0.912587744 | 0.01963  | 1.096  |



|            |        |        |        |        |        |        |        |        |             |          |          |         |             |          |        |
|------------|--------|--------|--------|--------|--------|--------|--------|--------|-------------|----------|----------|---------|-------------|----------|--------|
| 94447_at   | 23.2   | 13.9   | 14.6   | 3.6    | 9.7    | 16.2   | 3.2    | 20.1   | 0.789707205 | 13.825   | 12.3     | 1.525   | 1.12398374  | 0.8268   | -1.14  |
| 94448_at   | 654.3  | 634.2  | 691    | 676.4  | 650.6  | 579.8  | 703    | 691.4  | 0.810900129 | 663.975  | 656.2    | 7.775   | 1.011848522 | 0.7771   | 1.014  |
| 94449_at   | 753.8  | 763.9  | 1061.3 | 1112.1 | 829.5  | 812.1  | 901.4  | 962.4  | 0.671907857 | 922.775  | 876.35   | 46.425  | 1.052975409 | 0.7461   | -1.038 |
| 94450_at   | 672.4  | 598.5  | 765    | 961.5  | 829.3  | 846.4  | 990.4  | 898.9  | 0.172273169 | 749.35   | 891.25   | 141.9   | 0.840785414 | 0.1378   | 1.205  |
| 94451_at   | 562.9  | 456    | 514.5  | 556    | 496.7  | 675.8  | 601.2  | 648.2  | 0.133056751 | 522.35   | 605.475  | 83.125  | 0.862711095 | 0.1349   | 1.155  |
| 94452_g_at | 833.5  | 800.8  | 941.8  | 998.3  | 899    | 985.7  | 962.8  | 1030.7 | 0.217293996 | 893.6    | 969.55   | 75.95   | 0.92166469  | 0.2024   | 1.088  |
| 94453_at   | 595.5  | 751.7  | 465.1  | 574.2  | 757.7  | 615    | 596.3  | 463.6  | 0.895742811 | 596.625  | 608.15   | 11.525  | 0.981049083 | 0.8986   | 1.019  |
| 94454_at   | 2504.9 | 2341.5 | 2670.9 | 2105.9 | 2451.2 | 2821.8 | 2521.8 | 2207.2 | 0.607378889 | 2405.8   | 2500.5   | 94.7    | 0.962127574 | 0.6091   | 1.039  |
| 94455_at   | 2308.6 | 2134   | 2051.4 | 2109.6 | 2572.3 | 1925.1 | 2067.8 | 2000.1 | 0.954320505 | 2150.9   | 2141.325 | 9.575   | 1.00447153  | 0.89     | 1.01   |
| 94456_at   | 1800.7 | 2035.8 | 2731.1 | 2411.2 | 2119.6 | 2184.1 | 2233.6 | 2307.4 | 0.882067808 | 2244.7   | 2211.175 | 33.525  | 1.015161622 | 0.9759   | 1.003  |
| 94457_at   | 1114   | 1079.2 | 1025.1 | 1019   | 1008.7 | 1164.2 | 881.7  | 983.2  | 0.471952981 | 1059.325 | 1009.45  | 49.875  | 1.049408094 | 0.4226   | -1.054 |
| 94458_at   | 514.9  | 563.7  | 519.9  | 542.9  | 814    | 605.5  | 867.6  | 663.2  | 0.044271223 | 535.35   | 737.575  | 202.225 | 0.725824492 | 0.01187  | 1.364  |
| 94459_at   | 620.3  | 790.5  | 556.3  | 585.4  | 799.5  | 704    | 428.3  | 599.1  | 0.956896678 | 638.125  | 632.725  | 5.4     | 1.008534513 | 0.8776   | 1.025  |
| 94460_at   | 536.9  | 541.1  | 624.5  | 818.3  | 736.5  | 517    | 935.6  | 929.5  | 0.26212243  | 630.2    | 779.65   | 149.45  | 0.808311422 | 0.2843   | 1.222  |
| 94461_at   | 419.3  | 471.3  | 457.3  | 544.1  | 449.3  | 441.5  | 456.5  | 522.7  | 0.870156064 | 473      | 467.5    | 5.5     | 1.011764706 | 0.8911   | 1.01   |
| 94462_at   | 918.8  | 1102.6 | 955.9  | 921    | 1070.1 | 841.1  | 1156.1 | 1106.2 | 0.44033235  | 974.575  | 1043.375 | 68.8    | 0.934060141 | 0.4724   | 1.066  |
| 94463_at   | 169.8  | 144.9  | 221.6  | 253.2  | 151.7  | 194.4  | 280.8  | 263.9  | 0.539827436 | 197.375  | 222.7    | 25.325  | 0.886281994 | 0.5694   | 1.122  |
| 94464_at   | 389.4  | 465.5  | 530    | 528.5  | 536.2  | 362.9  | 598.3  | 508.3  | 0.715357893 | 478.35   | 501.425  | 23.075  | 0.953981154 | 0.7782   | 1.039  |
| 94465_g_at | 230.8  | 300.5  | 369    | 298.2  | 344    | 154.4  | 407.8  | 335.9  | 0.866679556 | 299.625  | 310.525  | 10.9    | 0.964898156 | 0.9615   | 1.012  |
| 94466_f_at | 1316   | 1621.2 | 1506.5 | 1507.9 | 1720.3 | 1398.6 | 1568.7 | 1266.4 | 0.996118963 | 1487.9   | 1488.5   | 0.6     | 0.99959691  | 0.9665   | 1.003  |
| 94467_at   | 149.3  | 98.9   | 131.7  | 198.9  | 148.9  | 117    | 143    | 193.2  | 0.831878038 | 144.7    | 150.525  | 5.825   | 0.961302109 | 0.7685   | 1.056  |
| 94468_at   | 181.6  | 170.2  | 170.9  | 188.3  | 178.7  | 171.9  | 224.6  | 173.1  | 0.525673833 | 177.75   | 187.075  | 9.325   | 0.950153682 | 0.527    | 1.047  |
| 94469_at   | 2288.8 | 2280.9 | 2427.6 | 2267.7 | 2673.9 | 2664.2 | 2714.4 | 2615.8 | 0.000616156 | 2316.25  | 2667.075 | 350.825 | 0.868460767 | 0.000201 | 1.152  |
| 94470_i_at | 260.7  | 284.9  | 350.9  | 366.1  | 326.9  | 255.6  | 313    | 364.5  | 0.985378086 | 315.65   | 315      | 0.65    | 1.002063492 | 0.9981   | 1      |
| 94471_r_at | 204.4  | 172.9  | 359    | 366.9  | 289.9  | 247.4  | 248.9  | 251    | 0.769381199 | 275.8    | 259.3    | 16.5    | 1.063632858 | 0.9632   | 1.01   |
| 94472_at   | 287.7  | 201.4  | 228.5  | 252    | 238.2  | 329.5  | 272.9  | 276.5  | 0.209916123 | 242.4    | 279.275  | 36.875  | 0.867961687 | 0.2042   | 1.154  |
| 94473_at   | 3531   | 3195.4 | 3251.7 | 2856.2 | 3749.6 | 3709.9 | 4127.3 | 3894.1 | 0.009711625 | 3208.575 | 3870.225 | 661.65  | 0.829040947 | 0.008966 | 1.209  |
| 94476_at   | 39.5   | 46     | 34.5   | 45.8   | 54.9   | 43.6   | 33.2   | 37.8   | 0.871844577 | 41.45    | 42.375   | 0.925   | 0.978171091 | 0.934    | 1.011  |
| 94477_at   | 104.9  | 109.2  | 91.7   | 98.5   | 157.1  | 159.5  | 89.6   | 121.6  | 0.158037776 | 101.075  | 131.95   | 30.875  | 0.766009852 | 0.135    | 1.275  |
| 94478_at   | 1098.9 | 1232.1 | 1428.9 | 1667.6 | 1282.1 | 1212   | 1625.8 | 1672.1 | 0.612326742 | 1356.875 | 1448     | 91.125  | 0.93706837  | 0.6008   | 1.07   |
| 94479_at   | 4.5    | 3.7    | 2.2    | 3.8    | 2.3    | 6.5    | 4.6    | 3.5    | 0.537663205 | 3.55     | 4.225    | 0.675   | 0.840236686 | 0.6529   | 1.137  |
| 94480_at   | 312.3  | 360.2  | 335.9  | 399.6  | 237.2  | 415.7  | 459.9  | 391    | 0.668970456 | 352      | 375.95   | 23.95   | 0.93629472  | 0.8058   | 1.041  |
| 94481_at   | 392.4  | 431.8  | 526.6  | 464.9  | 587    | 528.4  | 599.8  | 591.2  | 0.014468239 | 453.925  | 576.6    | 122.675 | 0.78724419  | 0.01196  | 1.276  |
| 94482_at   | 375.7  | 361.3  | 452    | 432.4  | 351.4  | 335.3  | 337.2  | 385.7  | 0.090565172 | 405.35   | 352.4    | 52.95   | 1.150255392 | 0.07237  | -1.147 |
| 94483_at   | 453.6  | 380.6  | 387.1  | 629.8  | 384.8  | 236.2  | 511.3  | 521.4  | 0.597532575 | 462.775  | 413.425  | 49.35   | 1.119368688 | 0.5506   | -1.148 |
| 94484_at   | 819.1  | 1065.5 | 1165.8 | 1419.6 | 1263.8 | 975.1  | 1114   | 1527.7 | 0.571528114 | 1117.5   | 1220.15  | 102.65  | 0.915870999 | 0.5541   | 1.098  |
| 94485_at   | 2081.5 | 2172.7 | 1730.8 | 1828.1 | 2446.1 | 2108.5 | 1843.8 | 1969.5 | 0.437758549 | 1953.275 | 2091.975 | 138.7   | 0.933699016 | 0.4368   | 1.07   |
| 94486_at   | 1952.1 | 1632.9 | 2265   | 2202.2 | 1642.9 | 2011.9 | 2119.2 | 1945.9 | 0.65572938  | 2013.05  | 1929.975 | 83.075  | 1.043044599 | 0.6921   | -1.039 |
| 94488_at   | 786.3  | 692.3  | 667.2  | 576.8  | 719.6  | 810.1  | 615.2  | 607.5  | 0.911881591 | 680.65   | 688.1    | 7.45    | 0.989173085 | 0.9199   | 1.01   |
| 94489_at   | 2489.8 | 2872.5 | 3665.5 | 3980.8 | 3261.7 | 2785.7 | 3879.4 | 3685.6 | 0.734033107 | 3252.15  | 3403.1   | 150.95  | 0.955643384 | 0.6906   | 1.056  |
| 94490_at   | 403.2  | 429.1  | 439.2  | 411.1  | 533.9  | 378.8  | 543.2  | 525    | 0.15043819  | 420.65   | 495.225  | 74.575  | 0.849411883 | 0.1333   | 1.166  |
| 94491_at   | 237.9  | 168.5  | 216.3  | 142.1  | 104.2  | 232.2  | 242.4  | 197.7  | 0.941921561 | 191.2    | 194.125  | 2.925   | 0.984932389 | 0.9485   | 1.015  |
| 94492_at   | 9387.2 | 9715.4 | 7495.6 | 7604.5 | 9424.1 | 8488.1 | 8434.6 | 8293.2 | 0.871731529 | 8550.675 | 8660     | 109.325 | 0.987375866 | 0.8124   | -1.019 |
| 94493_at   | 85.4   | 74.6   | 58.1   | 64.9   | 71.8   | 114.8  | 43.6   | 75.5   | 0.737800517 | 70.75    | 76.425   | 5.675   | 0.925744194 | 0.8927   | 1.031  |
| 94494_at   | 538.5  | 639.7  | 598.5  | 573.1  | 647.8  | 589.6  | 622.4  | 583.9  | 0.405750271 | 587.45   | 610.925  | 23.475  | 0.961574661 | 0.3919   | 1.041  |
| 94495_at   | 36.4   | 17.1   | 18.1   | 13.4   | 14.5   | 47.4   | 27.4   | 16.5   | 0.592207194 | 21.25    | 26.45    | 5.2     | 0.803402647 | 0.6213   | 1.197  |
| 94499_at   | 1063   | 1219.3 | 1161.9 | 1534   | 1415.8 | 1025.2 | 1271.1 | 1588.7 | 0.625688795 | 1244.55  | 1325.2   | 80.65   | 0.939141262 | 0.6422   | 1.061  |
| 94501_at   | 490.6  | 428.8  | 481.6  | 565.4  | 480.5  | 365.6  | 445.6  | 500.3  | 0.327589619 | 491.6    | 448      | 43.6    | 1.097321429 | 0.3306   | -1.1   |
| 94502_at   | 2076   | 2159.1 | 2042.2 | 1813.4 | 2358.6 | 2324.3 | 2071.2 | 2069.1 | 0.140911707 | 2022.675 | 2205.8   | 183.125 | 0.916980234 | 0.1446   | 1.091  |
| 94503_at   | 1516.9 | 1311.3 | 1348.9 | 1252   | 1161.7 | 1557.1 | 1565.1 | 1379.2 | 0.620042695 | 1357.275 | 1415.775 | 58.5    | 0.958679875 | 0.6588   | 1.038  |
| 94504_at   | 413.3  | 342.1  | 389.5  | 418.6  | 338.8  | 379.9  | 443.2  | 449.3  | 0.721760274 | 390.875  | 402.8    | 11.925  | 0.970394737 | 0.7566   | 1.027  |
| 94505_at   | 300.7  | 374.7  | 301.7  | 568.5  | 347.3  | 429.8  | 353.8  | 608.3  | 0.600731847 | 386.4    | 434.8    | 48.4    | 0.888684453 | 0.5455   | 1.135  |
| 94506_at   | 1191.4 | 1492.2 | 1052.1 | 1247   | 1518.8 | 1062.5 | 1040.1 | 1235.3 | 0.833974551 | 1245.675 | 1214.175 | 31.5    | 1.025943542 | 0.8038   | -1.03  |
| 94507_at   | 88.7   | 85.2   | 136.4  | 125.2  | 120.5  | 92.1   | 103.9  | 142.2  | 0.742819625 | 108.875  | 114.675  | 5.8     | 0.94942228  | 0.7065   | 1.062  |
| 94508_at   | 932.9  | 1061.3 | 1037.1 | 931.8  | 962.7  | 843.4  | 1014.6 | 1009.7 | 0.550721066 | 990.775  | 957.6    | 33.175  | 1.034643901 | 0.549    | -1.036 |
| 94509_at   | 514.1  | 542.3  | 595    | 633.8  | 887.9  | 681.9  | 684.4  | 625.9  | 0.075455837 | 571.3    | 720.025  | 148.725 | 0.793444672 | 0.04424  | 1.253  |



|            |        |        |        |        |        |        |        |        |             |          |          |         |             |          |        |
|------------|--------|--------|--------|--------|--------|--------|--------|--------|-------------|----------|----------|---------|-------------|----------|--------|
| 94510_at   | 920.9  | 577    | 1732.6 | 1510.7 | 1091.3 | 447    | 870.6  | 1308.3 | 0.461656772 | 1185.3   | 929.3    | 256     | 1.275476165 | 0.529    | -1.258 |
| 94511_at   | 356.9  | 370    | 396.5  | 417    | 334.1  | 353.9  | 435.8  | 378.8  | 0.729422332 | 385.1    | 375.65   | 9.45    | 1.025156396 | 0.69     | 1.028  |
| 94512_f_at | 187.6  | 243.2  | 252.2  | 188.3  | 241.8  | 197.6  | 253.5  | 200.1  | 0.81761653  | 217.825  | 223.25   | 5.425   | 0.975699888 | 0.7935   | 1.028  |
| 94513_r_at | 51.5   | 11.9   | 33.9   | 45.5   | 16.5   | 30.8   | 23.1   | 45.1   | 0.548988584 | 35.7     | 28.875   | 6.825   | 1.236363636 | 0.7277   | -1.156 |
| 94514_s_at | 1577.4 | 1410.4 | 1415.5 | 1140   | 1411.7 | 1200.3 | 1448.5 | 1337.6 | 0.745980816 | 1385.825 | 1349.525 | 36.3    | 1.026898353 | 0.7884   | -1.023 |
| 94515_at   | 120.7  | 142.6  | 160.9  | 168.6  | 194.7  | 188.6  | 225    | 211.6  | 0.006442948 | 148.2    | 204.975  | 56.775  | 0.723015002 | 0.008001 | 1.391  |
| 94516_f_at | 4259.3 | 4811   | 4085.2 | 3714.5 | 4845.8 | 5875.1 | 4814.3 | 4470.1 | 0.088111487 | 4217.5   | 5001.325 | 783.825 | 0.843276532 | 0.07616  | 1.185  |
| 94517_r_at | 296    | 259.2  | 167.6  | 238    | 240.2  | 229.6  | 318.9  | 267.1  | 0.508012611 | 240.2    | 263.95   | 23.75   | 0.910020837 | 0.4786   | 1.113  |
| 94518_at   | 2131.8 | 2155.5 | 1818.7 | 1377.5 | 2051.6 | 2027   | 1465.9 | 1460.8 | 0.644588633 | 1870.875 | 1751.325 | 119.55  | 1.068262601 | 0.6662   | -1.066 |
| 94520_at   | 15.2   | 10.8   | 12.7   | 11.6   | 25.7   | 41.9   | 15.6   | 21.5   | 0.092986451 | 12.575   | 26.175   | 13.6    | 0.480420248 | 0.02181  | 1.963  |
| 94521_at   | 714.9  | 647.9  | 669.5  | 560.3  | 571.7  | 703.9  | 667.3  | 599.3  | 0.786344296 | 648.15   | 635.55   | 12.6    | 1.019825348 | 0.7937   | -1.019 |
| 94522_at   | 2262.1 | 1980.7 | 1813.8 | 1577.4 | 1793.8 | 2348.6 | 1752.7 | 1833.1 | 0.910429257 | 1908.5   | 1932.05  | 23.55   | 0.987810874 | 0.8983   | 1.014  |
| 94524_at   | 633.5  | 634    | 733.4  | 548.9  | 875.9  | 751.5  | 651.4  | 674.6  | 0.164977477 | 637.45   | 738.35   | 100.9   | 0.863343943 | 0.1536   | 1.156  |
| 94526_at   | 1259.8 | 1172.9 | 1054.7 | 1037.2 | 1185.7 | 1058.3 | 881.5  | 978.2  | 0.253710233 | 1131.15  | 1025.925 | 105.225 | 1.102565977 | 0.2435   | -1.106 |
| 94527_at   | 33.2   | 6.7    | 4.3    | 5.2    | 5.6    | 8.1    | 4.2    | 7.2    | 0.448808089 | 12.35    | 6.275    | 6.075   | 1.96812749  | 0.533    | -1.382 |
| 94528_at   | 526.3  | 490.6  | 442.3  | 454.7  | 412.9  | 485.8  | 455.8  | 457.4  | 0.334313338 | 478.475  | 452.975  | 25.5    | 1.056294497 | 0.3351   | -1.056 |
| 94530_at   | 475    | 448.5  | 390.6  | 372.1  | 405.4  | 449.7  | 315.3  | 392.3  | 0.435884566 | 421.55   | 390.675  | 30.875  | 1.079029884 | 0.4311   | -1.083 |
| 94531_at   | 534.1  | 453.8  | 472.9  | 535.9  | 565    | 445.2  | 527.1  | 576.2  | 0.455758442 | 499.175  | 528.375  | 29.2    | 0.94473622  | 0.48     | 1.056  |
| 94532_at   | 1280.9 | 1356.3 | 1084.1 | 1061.2 | 1216.6 | 1055.5 | 1122.8 | 1128.1 | 0.460721853 | 1195.625 | 1130.75  | 64.875  | 1.057373425 | 0.4733   | -1.053 |
| 94534_at   | 459.1  | 375    | 394.4  | 345.1  | 391.4  | 448.1  | 425.6  | 349.1  | 0.764583274 | 393.4    | 403.55   | 10.15   | 0.974848222 | 0.7549   | 1.027  |
| 94535_at   | 2266.5 | 1830.4 | 2030.2 | 2403.5 | 1936   | 1578   | 2135.3 | 2103.9 | 0.321964293 | 2132.65  | 1938.3   | 194.35  | 1.100268276 | 0.3323   | -1.102 |
| 94536_s_at | 7046.1 | 7304.1 | 4420.2 | 5187.6 | 5470.8 | 5405.8 | 5153.3 | 5753.9 | 0.499421726 | 5989.5   | 5445.95  | 543.55  | 1.099808114 | 0.5696   | -1.077 |
| 94537_at   | 5760.7 | 7090.2 | 4373.9 | 4454.6 | 5985.5 | 5130.5 | 5171.1 | 4943   | 0.877557138 | 5419.85  | 5307.525 | 112.325 | 1.021163348 | 0.9784   | -1.003 |
| 94539_f_at | 14.4   | 10.5   | 11.9   | 16.5   | 10.4   | 19.6   | 11     | 10.9   | 0.897529192 | 13.325   | 12.975   | 0.35    | 1.026974952 | 0.7918   | -1.051 |
| 94540_at   | 16.1   | 12.1   | 9.2    | 15.1   | 9.6    | 16.4   | 12.4   | 15     | 0.920585341 | 13.125   | 13.35    | 0.225   | 0.983146067 | 0.921    | 1.018  |
| 94541_at   | 178.1  | 122.7  | 103.8  | 157.4  | 164.8  | 186.8  | 116.5  | 159.7  | 0.488714553 | 140.5    | 156.95   | 16.45   | 0.895189551 | 0.4815   | 1.125  |
| 94542_at   | 311.8  | 265.5  | 329.7  | 310.9  | 242.6  | 344.3  | 330.8  | 289.5  | 0.924160011 | 304.475  | 301.8    | 2.675   | 1.008863486 | 0.878    | -1.015 |
| 94543_at   | 267.6  | 160.6  | 160.8  | 200.4  | 183.8  | 275.3  | 206.5  | 171.6  | 0.739068535 | 197.35   | 209.3    | 11.95   | 0.942904921 | 0.7004   | 1.067  |
| 94545_at   | 75.4   | 92.4   | 106.3  | 119.1  | 101.9  | 102.8  | 108.9  | 107.8  | 0.510380252 | 98.3     | 105.35   | 7.05    | 0.933080209 | 0.4366   | 1.087  |
| 94548_at   | 1750.9 | 1444.7 | 1471.7 | 1395.7 | 1328.2 | 1841.9 | 1610   | 1534.8 | 0.653338744 | 1515.75  | 1578.725 | 62.975  | 0.960110216 | 0.6694   | 1.039  |
| 94549_at   | 1032.5 | 806.6  | 487.8  | 664.9  | 621.4  | 858.2  | 624.2  | 729.1  | 0.77057384  | 747.95   | 708.225  | 39.725  | 1.056090932 | 0.884    | 1.027  |
| 94550_at   | 1178.8 | 1221.7 | 1094.9 | 985.5  | 1144.3 | 1210.3 | 1156.1 | 1090   | 0.628868075 | 1120.225 | 1150.175 | 29.95   | 0.973960484 | 0.5975   | 1.029  |
| 94551_at   | 768.1  | 501.9  | 445.2  | 563.5  | 561.3  | 620.7  | 320.4  | 594.2  | 0.660502281 | 569.675  | 524.15   | 45.525  | 1.086854908 | 0.6443   | -1.099 |
| 94552_at   | 3394.7 | 3771.2 | 5389.6 | 5524.1 | 3783.9 | 3554.3 | 5135.3 | 4621.8 | 0.723478189 | 4519.9   | 4273.825 | 246.075 | 1.057577229 | 0.7783   | -1.045 |
| 94554_at   | 307.2  | 306.5  | 317.2  | 314.8  | 367.5  | 383.6  | 303.8  | 342.2  | 0.116459477 | 311.425  | 349.275  | 37.85   | 0.891632668 | 0.07545  | 1.117  |
| 94555_at   | 2916.3 | 2030   | 2378.7 | 2504.4 | 1879.4 | 2469.2 | 2307.9 | 2124.3 | 0.288594864 | 2457.35  | 2195.2   | 262.15  | 1.119419643 | 0.2928   | -1.116 |
| 94556_at   | 148.1  | 149.4  | 131    | 154    | 143.2  | 126.4  | 224.8  | 182.2  | 0.365834314 | 145.625  | 169.15   | 23.525  | 0.860922258 | 0.3766   | 1.135  |
| 94557_at   | 66.9   | 44.9   | 34.9   | 31.5   | 38.4   | 77.2   | 33.4   | 66.6   | 0.510900539 | 44.55    | 53.9     | 9.35    | 0.826530612 | 0.5376   | 1.189  |
| 94558_g_at | 842.3  | 832.4  | 757.9  | 892.2  | 718.5  | 652.8  | 627.1  | 811.1  | 0.045831622 | 831.2    | 702.375  | 128.825 | 1.183413419 | 0.04166  | -1.187 |
| 94559_at   | 222    | 220.4  | 209.1  | 270.5  | 267.7  | 205.7  | 193.9  | 223.1  | 0.722152944 | 230.5    | 222.6    | 7.9     | 1.035489668 | 0.6923   | -1.038 |
| 94561_at   | 674    | 593.7  | 582.9  | 562.1  | 556.1  | 532.8  | 554.3  | 564.8  | 0.125407969 | 603.175  | 552      | 51.175  | 1.092708333 | 0.08135  | -1.09  |
| 94562_at   | 509.8  | 485.4  | 513.2  | 468.9  | 428.7  | 496.2  | 641.4  | 516.6  | 0.599575533 | 494.325  | 520.725  | 26.4    | 0.949301455 | 0.6416   | 1.043  |
| 94563_at   | 4.6    | 7.4    | 2.8    | 15.8   | 2.7    | 22.6   | 2.1    | 4.3    | 0.963408055 | 7.65     | 7.925    | 0.275   | 0.965299685 | 0.7226   | -1.274 |
| 94564_at   | 147.8  | 79.9   | 117.9  | 178.6  | 109.3  | 171    | 140.9  | 159.3  | 0.597362591 | 131.05   | 145.125  | 14.075  | 0.903014643 | 0.5353   | 1.14   |
| 94565_at   | 42.3   | 28.2   | 7.8    | 9      | 4.7    | 10.8   | 9      | 34.7   | 0.536021715 | 21.825   | 14.8     | 7.025   | 1.474662162 | 0.509    | -1.513 |
| 94566_at   | 18.1   | 16     | 20.4   | 24.8   | 16.4   | 18.6   | 19.3   | 23.7   | 0.898106674 | 19.825   | 19.5     | 0.325   | 1.016666667 | 0.9229   | 1.012  |
| 94568_at   | 52.3   | 24.8   | 10.5   | 17.1   | 8.5    | 17.1   | 16.2   | 12     | 0.2614755   | 26.175   | 13.45    | 12.725  | 1.946096654 | 0.209    | -1.694 |
| 94571_at   | 2.4    | 20.6   | 2      | 4.3    | 2.1    | 3.2    | 7.1    | 5.9    | 0.587558343 | 7.325    | 4.575    | 2.75    | 1.601092896 | 0.8602   | -1.116 |
| 94618_at   | 38.5   | 36.4   | 26.4   | 32.8   | 29.2   | 37.6   | 42     | 23.5   | 0.930688595 | 33.525   | 33.075   | 0.45    | 1.013605442 | 0.8577   | 1.029  |
| 94619_at   | 96.6   | 99.7   | 94.7   | 101.1  | 69.8   | 89.2   | 124.3  | 84.2   | 0.633231374 | 98.025   | 91.875   | 6.15    | 1.066938776 | 0.5012   | -1.091 |
| 94621_at   | 251.9  | 252.4  | 194.8  | 244.1  | 220.4  | 294.5  | 215.9  | 221.4  | 0.926695066 | 235.8    | 238.05   | 2.25    | 0.990548204 | 0.9487   | 1.007  |
| 94622_at   | 103.5  | 37.7   | 52     | 31.3   | 30.9   | 115.5  | 46.8   | 53.6   | 0.829338107 | 56.125   | 61.7     | 5.575   | 0.909643436 | 0.8288   | 1.09   |
| 94623_at   | 75.4   | 55.1   | 51.4   | 50.7   | 52.1   | 72.9   | 41.4   | 31.2   | 0.447797477 | 58.15    | 49.4     | 8.75    | 1.177125506 | 0.3653   | -1.219 |
| 94624_at   | 17.7   | 21.9   | 8.6    | 16.1   | 11.9   | 32.2   | 6      | 14.9   | 0.978980261 | 16.075   | 16.25    | 0.175   | 0.989230769 | 0.7856   | -1.121 |
| 94625_at   | 181.8  | 148.5  | 191.7  | 186.3  | 135.8  | 230.5  | 165.4  | 126.2  | 0.646777014 | 177.075  | 164.475  | 12.6    | 1.076607387 | 0.5317   | -1.102 |
| 94626_at   | 24.3   | 101.3  | 62.5   | 60.8   | 20.6   | 55.2   | 54.3   | 21     | 0.243920932 | 62.225   | 37.775   | 24.45   | 1.647253475 | 0.2718   | -1.639 |



|            |       |       |       |        |       |       |        |       |             |         |         |         |             |         |        |
|------------|-------|-------|-------|--------|-------|-------|--------|-------|-------------|---------|---------|---------|-------------|---------|--------|
| 94627_at   | 59.6  | 70.1  | 42.9  | 63     | 60.2  | 69.8  | 80.2   | 81.9  | 0.115558628 | 58.9    | 73.025  | 14.125  | 0.806573091 | 0.1312  | 1.25   |
| 94628_r_at | 17    | 28.9  | 23.5  | 26.2   | 5.7   | 28.9  | 15.2   | 33    | 0.661821192 | 23.9    | 20.7    | 3.2     | 1.154589372 | 0.4654  | -1.383 |
| 94630_at   | 41.5  | 12.3  | 19.4  | 24.1   | 28.2  | 16.8  | 15.7   | 54.5  | 0.6988448   | 24.325  | 28.8    | 4.475   | 0.844618056 | 0.7413  | 1.142  |
| 94631_at   | 35.1  | 114.5 | 38    | 39.8   | 80.8  | 55.4  | 28.6   | 137.3 | 0.558910624 | 56.85   | 75.525  | 18.675  | 0.752730884 | 0.5605  | 1.305  |
| 94632_at   | 14.5  | 3.9   | 2.6   | 3      | 4.6   | 15    | 6.7    | 5.3   | 0.6289195   | 6       | 7.9     | 1.9     | 0.759493671 | 0.3994  | 1.536  |
| 94633_at   | 35.5  | 4.7   | 4     | 7.6    | 11.2  | 14.9  | 6.2    | 7     | 0.713121783 | 12.95   | 9.825   | 3.125   | 1.318066158 | 0.877   | 1.091  |
| 94634_at   | 45.7  | 35.3  | 24.5  | 93.6   | 32.3  | 115.4 | 63.1   | 171.7 | 0.245019797 | 49.775  | 95.625  | 45.85   | 0.520522876 | 0.2435  | 1.818  |
| 94635_at   | 24.3  | 68.4  | 18.4  | 25.1   | 22.5  | 75.3  | 18     | 15.2  | 0.945923524 | 34.05   | 32.75   | 1.3     | 1.039694656 | 0.7947  | -1.134 |
| 94636_at   | 7.9   | 13.4  | 6.4   | 7.7    | 8     | 9.8   | 8.3    | 6.7   | 0.718313457 | 8.85    | 8.2     | 0.65    | 1.079268293 | 0.8002  | -1.048 |
| 94637_at   | 66.8  | 68.9  | 60    | 101.6  | 29.9  | 102.9 | 79.6   | 53.3  | 0.685470969 | 74.325  | 66.425  | 7.9     | 1.118931125 | 0.5378  | -1.211 |
| 94638_at   | 3.1   | 3.2   | 2.6   | 2.2    | 4     | 4.1   | 2.3    | 5.9   | 0.17512782  | 2.775   | 4.075   | 1.3     | 0.680981595 | 0.1533  | 1.412  |
| 94639_at   | 2.7   | 2.4   | 2.2   | 2.8    | 2.6   | 4.7   | 1      | 3.2   | 0.681426249 | 2.525   | 2.875   | 0.35    | 0.87826087  | 0.9754  | 1.011  |
| 94640_at   | 5.7   | 17.2  | 9.5   | 4.4    | 10.6  | 15.6  | 13.9   | 9.3   | 0.378736597 | 9.2     | 12.35   | 3.15    | 0.744939271 | 0.2521  | 1.51   |
| 94641_at   | 16.5  | 9.8   | 17.9  | 14.2   | 14    | 2.9   | 2.1    | 23.4  | 0.499758564 | 14.6    | 10.6    | 4       | 1.377358491 | 0.258   | -2.125 |
| 94642_at   | 25.3  | 33.2  | 24.6  | 46.2   | 22.6  | 48.1  | 23.6   | 30    | 0.877314826 | 32.325  | 31.075  | 1.25    | 1.040225261 | 0.8194  | -1.056 |
| 94643_at   | 71.4  | 63.5  | 83    | 50.5   | 32.8  | 64.6  | 77.1   | 59.2  | 0.483898269 | 67.1    | 58.425  | 8.675   | 1.148480958 | 0.4565  | -1.184 |
| 94644_at   | 96.6  | 51.5  | 46.7  | 52.4   | 37.4  | 73.8  | 64.4   | 55.6  | 0.786189385 | 61.8    | 57.8    | 4       | 1.069204152 | 0.8212  | -1.054 |
| 94645_at   | 5.2   | 7.4   | 19.2  | 20     | 5.8   | 22.4  | 48.5   | 7.7   | 0.485462141 | 12.95   | 21.1    | 8.15    | 0.613744076 | 0.6428  | 1.338  |
| 94657_at   | 0.9   | 1     | 0.7   | 3.4    | 1.1   | 2.6   | 0.9    | 7.7   | 0.409998911 | 1.5     | 3.075   | 1.575   | 0.487804878 | 0.3886  | 1.749  |
| 94662_at   | 190.7 | 108   | 161.7 | 194.8  | 189.9 | 223   | 270.8  | 242.6 | 0.042678853 | 163.8   | 231.575 | 67.775  | 0.707330239 | 0.05813 | 1.439  |
| 94663_at   | 71.3  | 64.1  | 26.3  | 36.9   | 49.2  | 126.4 | 64.8   | 33.2  | 0.456227111 | 49.65   | 68.4    | 18.75   | 0.725877193 | 0.4811  | 1.317  |
| 94664_at   | 42.8  | 6.1   | 4.6   | 2.6    | 1.5   | 7.1   | 1.3    | 4.4   | 0.358128548 | 14.025  | 3.575   | 10.45   | 3.923076923 | 0.2313  | -2.651 |
| 94665_at   | 437.5 | 428.9 | 481.1 | 368.3  | 283.1 | 452.7 | 413.1  | 360.2 | 0.286509961 | 428.95  | 377.275 | 51.675  | 1.136969054 | 0.2765  | -1.149 |
| 94667_at   | 60.3  | 87.6  | 55.9  | 111.5  | 59    | 111.6 | 109.6  | 109.5 | 0.346778886 | 78.825  | 97.425  | 18.6    | 0.809083911 | 0.3679  | 1.245  |
| 94668_at   | 9.5   | 7.1   | 15.6  | 6      | 10.8  | 25.7  | 5.5    | 20.7  | 0.289778696 | 9.55    | 15.675  | 6.125   | 0.609250399 | 0.3669  | 1.487  |
| 94674_at   | 26.1  | 41.1  | 36.1  | 48.4   | 27.3  | 54.7  | 63.8   | 47.7  | 0.301702685 | 37.925  | 48.375  | 10.45   | 0.783979328 | 0.3654  | 1.248  |
| 94683_at   | 55.1  | 20.2  | 32    | 29.5   | 21.9  | 19.5  | 45.9   | 37.7  | 0.772745048 | 34.2    | 31.25   | 2.95    | 1.0944      | 0.7755  | -1.091 |
| 94684_at   | 13.5  | 5.5   | 5.1   | 3.2    | 3.2   | 7.4   | 3.2    | 5.3   | 0.455730025 | 6.825   | 4.775   | 2.05    | 1.429319372 | 0.4684  | -1.328 |
| 94685_at   | 12    | 9.7   | 8.7   | 15.6   | 8     | 14.8  | 7.5    | 7.2   | 0.406391352 | 11.5    | 9.375   | 2.125   | 1.226666667 | 0.335   | -1.25  |
| 94686_at   | 10.5  | 7.9   | 13.1  | 12.4   | 6.3   | 14.6  | 20.4   | 11.4  | 0.527181075 | 10.975  | 13.175  | 2.2     | 0.833017078 | 0.6884  | 1.122  |
| 94687_at   | 4.4   | 8.9   | 1.5   | 3      | 3.2   | 8.2   | 5.6    | 3.6   | 0.735035194 | 4.45    | 5.15    | 0.7     | 0.86407767  | 0.5445  | 1.318  |
| 94688_at   | 8.2   | 9.6   | 4.8   | 6.9    | 5.1   | 8.5   | 7.6    | 5.6   | 0.623366352 | 7.375   | 6.7     | 0.675   | 1.100746269 | 0.6553  | -1.095 |
| 94689_at   | 530.9 | 618.2 | 648.1 | 1131.4 | 742.4 | 707.6 | 1194.8 | 915.3 | 0.403617142 | 732.15  | 890.025 | 157.875 | 0.822617342 | 0.3274  | 1.243  |
| 94690_at   | 16.9  | 17    | 4.6   | 26.4   | 4.7   | 8     | 8      | 6.4   | 0.123407093 | 16.225  | 6.775   | 9.45    | 2.394833948 | 0.1148  | -2.077 |
| 94691_at   | 31.1  | 39.3  | 5.2   | 47.3   | 27    | 32.8  | 47     | 35.1  | 0.659881464 | 30.725  | 35.475  | 4.75    | 0.866102889 | 0.4789  | 1.481  |
| 94692_at   | 56.2  | 43.5  | 53.6  | 55.5   | 47.8  | 96.4  | 62.2   | 86    | 0.153864529 | 52.2    | 73.1    | 20.9    | 0.714090287 | 0.1227  | 1.357  |
| 94693_at   | 17.1  | 4     | 9.7   | 9.4    | 7.3   | 30.8  | 9      | 7.3   | 0.60402019  | 10.05   | 13.6    | 3.55    | 0.738970588 | 0.6585  | 1.238  |
| 94694_at   | 29.3  | 21.2  | 28.1  | 38     | 38.5  | 20.8  | 35.2   | 46.1  | 0.384977356 | 29.15   | 35.15   | 6       | 0.829302987 | 0.4531  | 1.183  |
| 94695_at   | 90.6  | 102.1 | 94.9  | 127.3  | 84.3  | 185.8 | 125.2  | 168.9 | 0.203025048 | 103.725 | 141.05  | 37.325  | 0.735377526 | 0.209   | 1.312  |
| 94696_at   | 23.4  | 11.4  | 17.2  | 18.2   | 32.2  | 26.4  | 57.4   | 14.6  | 0.193156157 | 17.55   | 32.65   | 15.1    | 0.537519142 | 0.1443  | 1.709  |
| 94697_at   | 129.9 | 64.9  | 78.8  | 107.2  | 63.3  | 134.5 | 109.5  | 78.8  | 0.952946582 | 95.2    | 96.525  | 1.325   | 0.986272986 | 0.9747  | 1.008  |
| 94698_at   | 72.3  | 84.3  | 78.3  | 95.9   | 48.2  | 67.1  | 125.4  | 104.7 | 0.852488688 | 82.7    | 86.35   | 3.65    | 0.957730168 | 0.9363  | -1.019 |
| 94699_at   | 203.1 | 202.6 | 166.4 | 190.1  | 144   | 248.4 | 158.7  | 154.2 | 0.611304601 | 190.55  | 176.325 | 14.225  | 1.08067489  | 0.4839  | -1.104 |
| 94700_at   | 31.9  | 4.1   | 26.7  | 21.3   | 13.8  | 27.7  | 49.5   | 18.5  | 0.547261768 | 21      | 27.375  | 6.375   | 0.767123288 | 0.5073  | 1.469  |
| 94701_at   | 12.3  | 19.7  | 11.5  | 6.7    | 14    | 41.8  | 4.8    | 37.5  | 0.278672075 | 12.55   | 24.525  | 11.975  | 0.511722732 | 0.4616  | 1.544  |
| 94702_at   | 15.9  | 1.8   | 2.4   | 12.8   | 3     | 1.8   | 13.5   | 13.8  | 0.968463219 | 8.225   | 8.025   | 0.2     | 1.024922118 | 0.9625  | 1.038  |
| 94703_at   | 12.7  | 25.8  | 11.6  | 34.7   | 16.7  | 21.6  | 11     | 19.5  | 0.541065961 | 21.2    | 17.2    | 4       | 1.23255814  | 0.676   | -1.143 |
| 94704_at   | 39.3  | 26.4  | 27.3  | 31.3   | 32.3  | 53.6  | 24.8   | 51.6  | 0.28516039  | 31.075  | 40.575  | 9.5     | 0.765865681 | 0.3135  | 1.257  |
| 94705_at   | 46.5  | 25.7  | 20.4  | 72.4   | 29.8  | 61.5  | 22.6   | 80.8  | 0.695289384 | 41.25   | 48.675  | 7.425   | 0.847457627 | 0.7118  | 1.174  |
| 94706_s_at | 378.7 | 300.2 | 300   | 449.2  | 261.6 | 455.1 | 388    | 390.9 | 0.76586089  | 357.025 | 373.9   | 16.875  | 0.954867612 | 0.7989  | 1.042  |
| 94707_s_at | 52    | 51.8  | 23.4  | 18.4   | 13.7  | 84.7  | 25.6   | 25.3  | 0.961940882 | 36.4    | 37.325  | 0.925   | 0.975217683 | 0.8248  | -1.114 |
| 94708_at   | 72.3  | 47.4  | 50.7  | 40.3   | 41.5  | 99.8  | 53.5   | 41.8  | 0.694919716 | 52.675  | 59.15   | 6.475   | 0.890532544 | 0.7802  | 1.073  |
| 94709_at   | 134.7 | 104.5 | 84.6  | 84.8   | 76.7  | 138.1 | 94.6   | 86.7  | 0.867691655 | 102.15  | 99.025  | 3.125   | 1.031557687 | 0.83    | -1.038 |
| 94710_g_at | 3.9   | 4.7   | 1     | 5.3    | 3.3   | 3.4   | 1.4    | 4.2   | 0.587474595 | 3.725   | 3.075   | 0.65    | 1.211382114 | 0.8699  | -1.083 |
| 94711_at   | 40.9  | 13.9  | 50.9  | 50.3   | 38.3  | 17.9  | 15.4   | 16    | 0.155851016 | 39      | 21.9    | 17.1    | 1.780821918 | 0.2016  | -1.715 |
| 94712_at   | 52.8  | 29.1  | 66.8  | 89     | 72.4  | 69.3  | 46.8   | 84.8  | 0.574683292 | 59.425  | 68.325  | 8.9     | 0.869740212 | 0.4957  | 1.216  |



|            |         |         |         |         |         |         |         |         |             |           |          |             |             |         |        |
|------------|---------|---------|---------|---------|---------|---------|---------|---------|-------------|-----------|----------|-------------|-------------|---------|--------|
| 94713_at   | 1530.8  | 1235.4  | 1856    | 2454.7  | 1205.7  | 1117.2  | 1941.2  | 1495.7  | 0.347937712 | 1769.225  | 1439.95  | 329.275     | 1.228671134 | 0.3421  | -1.218 |
| 94714_at   | 7.2     | 4.2     | 7.4     | 11.5    | 5.6     | 29.9    | 17.2    | 6.6     | 0.29448369  | 7.575     | 14.825   | 7.25        | 0.510961214 | 0.3031  | 1.657  |
| 94715_at   | 59.4    | 32.8    | 17.7    | 8.7     | 20.5    | 54.3    | 10.2    | 18.7    | 0.809191228 | 29.65     | 25.925   | 3.725       | 1.143683703 | 0.8762  | -1.091 |
| 94716_f_at | 55.3    | 56      | 52.3    | 52.7    | 76      | 58.3    | 14.6    | 63.9    | 0.952072695 | 54.075    | 53.2     | 0.875       | 1.016447368 | 0.6495  | -1.2   |
| 94717_f_at | 95.2    | 20.1    | 19.9    | 16      | 53.2    | 58      | 79.4    | 22.2    | 0.524156626 | 37.8      | 53.2     | 15.4        | 0.710526316 | 0.3103  | 1.729  |
| 94718_at   | 6.2     | 5.1     | 2.5     | 5.7     | 1.4     | 3.1     | 3.7     | 4.6     | 0.168418774 | 4.875     | 3.2      | 1.675       | 1.5234375   | 0.2153  | -1.565 |
| 94719_at   | 5.5     | 6.6     | 2.6     | 4.7     | 2.3     | 3.4     | 4.5     | 3.2     | 0.18349821  | 4.85      | 3.35     | 1.5         | 1.447761194 | 0.2084  | -1.412 |
| 94720_at   | 113     | 22.3    | 90.6    | 134     | 68.6    | 105.5   | 134.7   | 61.9    | 0.930599098 | 89.975    | 92.675   | 2.7         | 0.970865929 | 0.7186  | 1.185  |
| 94721_at   | 18.5    | 10.5    | 5.1     | 36.7    | 19.9    | 37.8    | 32.8    | 26.8    | 0.205215891 | 17.7      | 29.325   | 11.625      | 0.603580563 | 0.1523  | 2.057  |
| 94722_f_at | 20.7    | 9       | 10.2    | 12.2    | 11      | 22.9    | 17.7    | 11.9    | 0.484960454 | 13.025    | 15.875   | 2.85        | 0.820472441 | 0.4359  | 1.233  |
| 94723_at   | 5.1     | 24.9    | 14.4    | 6.3     | 36      | 57      | 23.6    | 38      | 0.024280097 | 12.675    | 38.65    | 25.975      | 0.327943079 | 0.02118 | 3.556  |
| 94724_at   | 3.6     | 2.2     | 0.4     | 1       | 0.6     | 5.1     | 5.4     | 2.1     | 0.322688129 | 1.8       | 3.3      | 1.5         | 0.545454545 | 0.4089  | 1.849  |
| 94725_f_at | 179.5   | 170     | 173.8   | 155.1   | 155.7   | 237.9   | 236.3   | 184     | 0.193141511 | 169.6     | 203.475  | 33.875      | 0.833517631 | 0.1705  | 1.183  |
| 94726_at   | 13.9    | 8.8     | 8.7     | 9.4     | 6.7     | 9.6     | 8.7     | 8.3     | 0.241257301 | 10.2      | 8.325    | 1.875       | 1.225225225 | 0.208   | -1.208 |
| 94727_f_at | 69.8    | 26.3    | 16.9    | 38.1    | 27.6    | 59      | 12.9    | 8.9     | 0.534049516 | 37.775    | 27.1     | 10.675      | 1.393911439 | 0.4071  | -1.584 |
| 94728_f_at | 92.8    | 177.9   | 102.7   | 22.1    | 75.1    | 83.9    | 121.7   | 37.5    | 0.618633858 | 98.875    | 79.55    | 19.325      | 1.242928975 | 0.9012  | -1.068 |
| 94729_r_at | 13.2    | 17.4    | 17.1    | 21.6    | 10.5    | 13.3    | 10.9    | 18.3    | 0.151861721 | 17.325    | 13.25    | 4.075       | 1.30754717  | 0.1349  | -1.325 |
| 94730_at   | 21.1    | 12.9    | 0.6     | 2.2     | 2.5     | 13.2    | 5.1     | 9       | 0.758866716 | 9.2       | 7.45     | 1.75        | 1.234899329 | 0.7082  | 1.418  |
| 94731_at   | 51.3    | 35.9    | 20.3    | 28.4    | 27.9    | 38.5    | 28.5    | 13.6    | 0.445234579 | 33.975    | 27.125   | 6.85        | 1.252534562 | 0.4562  | -1.265 |
| 94732_at   | 30.1    | 12.2    | 12.3    | 10.2    | 12.5    | 29.9    | 11.6    | 18.8    | 0.761136393 | 16.2      | 18.2     | 2           | 0.89010989  | 0.6775  | 1.153  |
| 94733_at   | 153.5   | 144.8   | 125.4   | 113     | 142.4   | 282     | 70.7    | 120.5   | 0.696044942 | 134.175   | 153.9    | 19.725      | 0.871832359 | 0.9458  | 1.021  |
| 94734_at   | 13.5    | 4.9     | 5.3     | 6       | 4.1     | 11.7    | 8.7     | 11.8    | 0.567177546 | 7.425     | 9.075    | 1.65        | 0.818181818 | 0.5664  | 1.23   |
| 94735_s_at | 100.4   | 43.8    | 89.7    | 106.9   | 87      | 130.7   | 78.7    | 82.5    | 0.629142097 | 85.2      | 94.725   | 9.525       | 0.899445764 | 0.5755  | 1.151  |
| 94736_at   | 103.5   | 61      | 83      | 70      | 48.5    | 121     | 115.5   | 97.6    | 0.430713111 | 79.375    | 95.65    | 16.275      | 0.829848406 | 0.5626  | 1.159  |
| 94737_at   | 17.6    | 23.4    | 18.8    | 19      | 33.3    | 48.8    | 11      | 18.9    | 0.39428528  | 19.7      | 28       | 8.3         | 0.703571429 | 0.5544  | 1.231  |
| 94738_s_at | 0.9     | 1.6     | 0.5     | 0.8     | 1.2     | 1.9     | 0.8     | 0.9     | 0.490423531 | 0.95      | 1.2      | 0.25        | 0.791666667 | 0.4771  | 1.251  |
| 94739_at   | 43.5    | 68.3    | 37.5    | 61.5    | 52.4    | 78.5    | 65.1    | 74.4    | 0.162901568 | 52.7      | 67.6     | 14.9        | 0.779585799 | 0.1615  | 1.306  |
| 94740_g_at | 10.1    | 7.6     | 15.8    | 5.4     | 14.4    | 10      | 4.5     | 17.3    | 0.628961988 | 9.725     | 11.55    | 1.825       | 0.841991342 | 0.7309  | 1.145  |
| 94741_at   | 20.4    | 8.4     | 14.6    | 5.6     | 4.3     | 9.7     | 4.8     | 23.1    | 0.758113366 | 12.25     | 10.475   | 1.775       | 1.169451074 | 0.5848  | -1.321 |
| 94743_f_at | 120.3   | 183.6   | 95.7    | 117.2   | 144.6   | 128.1   | 121.8   | 133     | 0.898873662 | 129.2     | 131.875  | 2.675       | 0.97971564  | 0.7476  | 1.049  |
| 94744_at   | 78      | 36.1    | 104.8   | 116.9   | 137.1   | 111.4   | 131.6   | 106.8   | 0.123037445 | 83.95     | 121.725  | 37.775      | 0.689669337 | 0.1443  | 1.579  |
| 94745_f_at | 66.9    | 67.6    | 60.3    | 78.6    | 58      | 82.5    | 70.7    | 60      | 0.938473618 | 68.35     | 67.8     | 0.55        | 1.008112094 | 0.8921  | 1.014  |
| 94746_at   | 12.3    | 12.2    | 7.3     | 41.5    | 6.7     | 38.8    | 25.2    | 8.2     | 0.902103617 | 18.325    | 19.725   | 1.4         | 0.929024081 | 0.9471  | 1.04   |
| 94747_at   | 20.6    | 15.6    | 15.2    | 15.1    | 13.8    | 22.6    | 15.2    | 14.9    | 1           | 16.625    | 16.625   | 3.55271E-15 | 1           | 0.9247  | -1.013 |
| 94748_g_at | 86.2    | 62.2    | 113.3   | 119.4   | 85.9    | 106.1   | 108.1   | 119.5   | 0.549714385 | 95.275    | 104.9    | 9.625       | 0.908245949 | 0.4901  | 1.129  |
| 94749_f_at | 68.8    | 57.7    | 39.8    | 33.9    | 36.2    | 77.5    | 11.2    | 36      | 0.565044656 | 50.05     | 40.225   | 9.825       | 1.244251088 | 0.4019  | -1.474 |
| 94750_at   | 2182    | 1741.4  | 1692.5  | 2385.7  | 1645.5  | 1974.3  | 1499.3  | 2135.2  | 0.435938746 | 2000.4    | 1813.575 | 186.825     | 1.103014764 | 0.438   | -1.102 |
| 94752_s_at | 22.5    | 71.4    | 61      | 80.7    | 32.8    | 20.8    | 65      | 45.7    | 0.308625185 | 58.9      | 41.075   | 17.825      | 1.433962264 | 0.4031  | -1.406 |
| 94753_at   | 42.8    | 21.1    | 32.9    | 24.5    | 24.8    | 54.7    | 39.6    | 48.6    | 0.206067423 | 30.325    | 41.925   | 11.6        | 0.723315444 | 0.2222  | 1.376  |
| 94754_at   | 13.2    | 7       | 7       | 17.4    | 8.6     | 12      | 25.3    | 42.9    | 0.255168786 | 11.15     | 22.2     | 11.05       | 0.502252252 | 0.2277  | 1.779  |
| 94755_at   | 28.5    | 21.9    | 2.9     | 7.7     | 18.1    | 51.8    | 27.8    | 9.7     | 0.333910908 | 15.25     | 26.85    | 11.6        | 0.567970205 | 0.2934  | 2.068  |
| 94756_at   | 19      | 4.6     | 4.7     | 3.9     | 1.3     | 7.6     | 6.2     | 1.8     | 0.389880521 | 8.05      | 4.225    | 3.825       | 1.905325444 | 0.2888  | -1.961 |
| 94757_at   | 108.2   | 108.9   | 103.2   | 110.9   | 83.9    | 168.7   | 132.6   | 112.6   | 0.419670508 | 107.8     | 124.45   | 16.65       | 0.86621133  | 0.4757  | 1.119  |
| 94758_s_at | 15.6    | 5.4     | 1.6     | 1.8     | 9.4     | 13      | 3.5     | 7.2     | 0.595953216 | 6.1       | 8.275    | 2.175       | 0.737160121 | 0.3358  | 1.884  |
| 94759_at   | 45      | 25.1    | 21.1    | 18.2    | 23.3    | 26.1    | 16.7    | 46.6    | 0.92872726  | 27.35     | 28.175   | 0.825       | 0.970718722 | 0.945   | 1.021  |
| 94760_at   | 6.6     | 2.5     | 6.4     | 5.6     | 4.8     | 11.5    | 5.5     | 3.3     | 0.646117866 | 5.275     | 6.275    | 1           | 0.84063745  | 0.7156  | 1.142  |
| 94761_at   | 4.8     | 12.8    | 21.4    | 3.3     | 5.3     | 4.8     | 17.1    | 7.4     | 0.71840324  | 10.575    | 8.65     | 1.925       | 1.222543353 | 0.8854  | -1.081 |
| 94762_at   | 90.3    | 88.1    | 47.2    | 74.7    | 78.9    | 121.4   | 58.6    | 86      | 0.524042195 | 75.075    | 86.225   | 11.15       | 0.870687156 | 0.5474  | 1.145  |
| 94763_at   | 10.7    | 28.5    | 6.9     | 16.5    | 16.2    | 7.1     | 12.2    | 9.7     | 0.441806831 | 15.65     | 11.3     | 4.35        | 1.384955752 | 0.5264  | -1.266 |
| 94764_at   | 57.8    | 21.3    | 98.5    | 53.5    | 52.9    | 96.4    | 64.5    | 69.5    | 0.509077222 | 57.775    | 70.825   | 13.05       | 0.815743029 | 0.392   | 1.37   |
| 94765_at   | 187.3   | 236.2   | 230.6   | 180.7   | 189.9   | 197.9   | 199.2   | 147.4   | 0.233093773 | 208.7     | 183.6    | 25.1        | 1.13671024  | 0.2454  | -1.137 |
| 94766_at   | 24662.2 | 26163.7 | 15974.3 | 18756.7 | 19737.5 | 19830.4 | 22035.2 | 21861.7 | 0.845653763 | 21389.225 | 20866.2  | 523.025     | 1.025065656 | 0.9599  | -1.006 |
| 94767_at   | 18845.9 | 22826.3 | 13502.2 | 15003   | 17200.7 | 15016.9 | 16805.9 | 17261.3 | 0.679004001 | 17544.35  | 16571.2  | 973.15      | 1.058725379 | 0.7674  | -1.038 |
| 94768_at   | 3581.8  | 3525.6  | 4022.1  | 5050.3  | 3215.5  | 2924.8  | 3964.2  | 4156    | 0.338058667 | 4044.95   | 3565.125 | 479.825     | 1.134588549 | 0.3261  | -1.134 |
| 94769_at   | 19.1    | 14.3    | 19      | 8.5     | 21.4    | 80.1    | 34.8    | 14      | 0.228815924 | 15.225    | 37.575   | 22.35       | 0.405189621 | 0.1301  | 2.088  |
| 94770_at   | 227.2   | 219.1   | 253.7   | 274.5   | 252     | 239.3   | 315.3   | 231.9   | 0.513745169 | 243.625   | 259.625  | 16          | 0.938372653 | 0.5136  | 1.062  |



|            |         |         |         |         |         |         |         |         |             |           |           |         |             |         |        |
|------------|---------|---------|---------|---------|---------|---------|---------|---------|-------------|-----------|-----------|---------|-------------|---------|--------|
| 94771_at   | 161.8   | 130.9   | 215.2   | 211.8   | 113.8   | 163.6   | 281.2   | 221.3   | 0.732659455 | 179.925   | 194.975   | 15.05   | 0.922810617 | 0.8489  | 1.047  |
| 94772_at   | 48.4    | 32.9    | 24.6    | 40.9    | 16.4    | 60.1    | 40.2    | 40.6    | 0.809569881 | 36.7      | 39.325    | 2.625   | 0.93324857  | 0.9959  | 1.002  |
| 94773_at   | 2.9     | 3.3     | 2.5     | 8       | 2.9     | 5.5     | 1.7     | 2.3     | 0.513727776 | 4.175     | 3.1       | 1.075   | 1.346774194 | 0.4501  | -1.338 |
| 94774_at   | 2.6     | 1.9     | 1.4     | 2.2     | 1.5     | 8.4     | 2       | 3.9     | 0.309099226 | 2.025     | 3.95      | 1.925   | 0.512658228 | 0.2927  | 1.603  |
| 94775_at   | 499.5   | 364.7   | 311.8   | 334.2   | 296.6   | 530.8   | 278.6   | 376.3   | 0.925459887 | 377.55    | 370.575   | 6.975   | 1.018822101 | 0.8521  | -1.036 |
| 94776_f_at | 18.6    | 8.7     | 4.4     | 2.8     | 2.8     | 21.4    | 3.4     | 3       | 0.872340991 | 8.625     | 7.65      | 0.975   | 1.12745098  | 0.6579  | -1.346 |
| 94777_at   | 58.9    | 29.7    | 45.3    | 52.8    | 48.9    | 81.7    | 61.1    | 94.9    | 0.09357007  | 46.675    | 71.65     | 24.975  | 0.651430565 | 0.089   | 1.535  |
| 94778_at   | 158.2   | 153.3   | 209     | 242     | 360.3   | 346.4   | 194.4   | 176.8   | 0.209833524 | 190.625   | 269.475   | 78.85   | 0.707394007 | 0.2     | 1.368  |
| 94779_f_at | 11      | 8.8     | 8.1     | 6.1     | 6.6     | 79      | 8.6     | 6.6     | 0.420830574 | 8.5       | 25.2      | 16.7    | 0.337301587 | 0.4885  | 1.573  |
| 94780_at   | 193.3   | 240.9   | 165.2   | 345.6   | 230.9   | 156.6   | 375.4   | 344.9   | 0.552081778 | 236.25    | 276.95    | 40.7    | 0.853042065 | 0.6022  | 1.152  |
| 94781_at   | 19239.2 | 24297.3 | 14386   | 12192.6 | 18457.1 | 19552.1 | 11009   | 15622.7 | 0.694328584 | 17528.775 | 16160.225 | 1368.55 | 1.084686321 | 0.74    | -1.072 |
| 94782_at   | 1.4     | 5.4     | 10      | 6.9     | 1.2     | 1.2     | 12      | 9.3     | 1           | 5.925     | 5.925     | 0       | 1           | 0.7109  | -1.346 |
| 94783_at   | 12.3    | 7.1     | 4.4     | 5.5     | 6       | 6.6     | 6.7     | 6.7     | 0.670087605 | 7.325     | 6.5       | 0.825   | 1.126923077 | 0.8602  | -1.042 |
| 94784_at   | 501.5   | 355.7   | 404.3   | 470     | 381.9   | 514.5   | 485.1   | 491.8   | 0.452060752 | 432.875   | 468.325   | 35.45   | 0.924304703 | 0.458   | 1.084  |
| 94785_at   | 31.3    | 20.3    | 30.4    | 13.5    | 7.4     | 31.1    | 27.3    | 7.2     | 0.49453561  | 23.875    | 18.25     | 5.625   | 1.308219178 | 0.3628  | -1.552 |
| 94786_at   | 114.4   | 49.2    | 50.5    | 50.5    | 45.7    | 95.3    | 55.1    | 47.3    | 0.79944636  | 66.15     | 60.85     | 5.3     | 1.087099425 | 0.8336  | -1.061 |
| 94787_at   | 166.6   | 146.7   | 127.4   | 108.9   | 85      | 195.2   | 93.8    | 143.4   | 0.789140648 | 137.4     | 129.35    | 8.05    | 1.062234248 | 0.6415  | -1.11  |
| 94788_f_at | 13924.1 | 12907.6 | 9876.5  | 10583.9 | 10847.5 | 11124.1 | 10815.8 | 10067.1 | 0.332447651 | 11823.025 | 10713.625 | 1109.4  | 1.103550386 | 0.3268  | -1.094 |
| 94789_r_at | 14405.1 | 15917.6 | 10353.8 | 12076.2 | 11563.3 | 12257.7 | 13033.4 | 12209.9 | 0.514463636 | 13188.175 | 12266.075 | 922.1   | 1.075174822 | 0.564   | -1.062 |
| 94790_at   | 119.3   | 56.4    | 117.2   | 129     | 95      | 131.7   | 103.1   | 99.8    | 0.921727964 | 105.475   | 107.4     | 1.925   | 0.98207635  | 0.7849  | 1.061  |
| 94791_s_at | 323.4   | 195.8   | 334.4   | 257.5   | 243.8   | 362.9   | 313.9   | 265.4   | 0.669777491 | 277.775   | 296.5     | 18.725  | 0.936846543 | 0.6382  | 1.078  |
| 94792_at   | 13.9    | 61.6    | 41.6    | 57.1    | 39.4    | 31.4    | 54      | 20      | 0.59323456  | 43.55     | 36.2      | 7.35    | 1.203038674 | 0.8037  | -1.11  |
| 94793_at   | 67.9    | 66.2    | 38      | 35.7    | 35.7    | 12.2    | 30.5    | 19.2    | 0.043552469 | 51.95     | 24.4      | 27.55   | 2.129098361 | 0.0373  | -2.212 |
| 94794_at   | 5434.6  | 6171.8  | 6115.8  | 6338.8  | 5842.8  | 5280.7  | 5527.4  | 5811    | 0.153036836 | 6015.25   | 5615.475  | 399.775 | 1.071191662 | 0.1536  | -1.07  |
| 94795_at   | 53.2    | 23      | 29.9    | 8.5     | 25.9    | 73.2    | 31.6    | 41.2    | 0.348880725 | 28.65     | 42.975    | 14.325  | 0.666666667 | 0.2886  | 1.676  |
| 94796_at   | 1454.3  | 1513.4  | 2076.2  | 1705.3  | 1374.3  | 1100.9  | 1488.5  | 1430.9  | 0.094836498 | 1687.3    | 1348.65   | 338.65  | 1.251102955 | 0.07934 | -1.247 |
| 94797_at   | 8.4     | 6.2     | 8.6     | 8.4     | 9.9     | 14.4    | 8.7     | 9.3     | 0.130250074 | 7.9       | 10.575    | 2.675   | 0.747044917 | 0.08327 | 1.33   |
| 94798_at   | 2.7     | 2       | 5.5     | 2.3     | 8.6     | 7       | 14.5    | 6.2     | 0.042582218 | 3.125     | 9.075     | 5.95    | 0.344352617 | 0.01009 | 2.957  |
| 94799_at   | 86.9    | 76.7    | 53.2    | 48.4    | 67.2    | 68.5    | 29.1    | 77.7    | 0.703301623 | 66.3      | 60.625    | 5.675   | 1.093608247 | 0.6559  | -1.132 |
| 94800_at   | 22.2    | 28.1    | 13.9    | 20.2    | 20.9    | 33.5    | 33.6    | 16.8    | 0.371494002 | 21.1      | 26.2      | 5.1     | 0.805343511 | 0.4037  | 1.226  |
| 94801_at   | 159.2   | 172.4   | 299.4   | 301.5   | 193.5   | 219.8   | 253.3   | 253.2   | 0.942957599 | 233.125   | 229.95    | 3.175   | 1.013807349 | 0.9008  | 1.024  |
| 94802_at   | 122.3   | 216.7   | 277.8   | 269.3   | 178.3   | 221.1   | 168.2   | 177.3   | 0.406122152 | 221.525   | 186.225   | 35.3    | 1.189555645 | 0.5375  | -1.139 |
| 94803_at   | 217.4   | 190.7   | 245.8   | 278.2   | 216.7   | 236.4   | 285.7   | 283.8   | 0.409878834 | 233.025   | 255.65    | 22.625  | 0.911500098 | 0.4038  | 1.1    |
| 94804_at   | 533.8   | 470.2   | 541.4   | 617.2   | 490.9   | 720.9   | 619     | 595.2   | 0.291503352 | 540.65    | 606.5     | 65.85   | 0.891426216 | 0.2974  | 1.117  |
| 94805_f_at | 24781.9 | 26459.9 | 13400.7 | 16707.7 | 17334.2 | 16467.6 | 18192   | 18800.2 | 0.465176454 | 20337.55  | 17698.5   | 2639.05 | 1.149111507 | 0.5582  | -1.107 |
| 94806_at   | 2104.5  | 2628    | 2448.7  | 1992.5  | 2801.5  | 2298.5  | 2476.3  | 2507.6  | 0.260150131 | 2293.425  | 2520.975  | 227.55  | 0.909737304 | 0.245   | 1.103  |
| 94807_at   | 877.8   | 829.3   | 1024.6  | 901.3   | 727.6   | 843.8   | 907.5   | 719.9   | 0.13013957  | 908.25    | 799.7     | 108.55  | 1.135738402 | 0.1245  | -1.138 |
| 94809_at   | 78.2    | 76.6    | 56.1    | 112.8   | 121.9   | 91.4    | 99.7    | 149.6   | 0.095577037 | 80.925    | 115.65    | 34.725  | 0.699740597 | 0.08654 | 1.446  |
| 94810_at   | 3019    | 2798.8  | 2668.2  | 2615.5  | 2856.7  | 2590.3  | 2776.4  | 2811    | 0.881623526 | 2775.375  | 2758.6    | 16.775  | 1.006080983 | 0.8966  | 1.005  |
| 94811_s_at | 2499.3  | 2415.8  | 2600.3  | 1857.3  | 2360.8  | 2238    | 2587.2  | 2181.3  | 0.994600973 | 2343.175  | 2341.825  | 1.35    | 1.000576473 | 0.9499  | 1.006  |
| 94812_at   | 484.9   | 486.6   | 592.9   | 497.5   | 665.6   | 463.6   | 561.2   | 534.9   | 0.444569954 | 515.475   | 556.325   | 40.85   | 0.926571698 | 0.4516  | 1.074  |
| 94813_at   | 973.6   | 1342    | 1379.1  | 1895    | 1196.1  | 1281.6  | 2024.2  | 1852.3  | 0.519945257 | 1397.425  | 1588.55   | 191.125 | 0.879685877 | 0.5167  | 1.139  |
| 94814_at   | 4710.5  | 2843.8  | 2930.4  | 2743.2  | 3362.1  | 3698.7  | 2922.8  | 2807.2  | 0.841278873 | 3306.975  | 3197.7    | 109.275 | 1.034172999 | 0.9276  | -1.014 |
| 94815_at   | 499.2   | 597.5   | 539.6   | 493.3   | 568.4   | 620.5   | 529.9   | 568.5   | 0.244782372 | 532.4     | 571.825   | 39.425  | 0.931054081 | 0.2316  | 1.076  |
| 94817_at   | 6876.1  | 7892.7  | 6191.5  | 6167.2  | 6140    | 6336.2  | 7360.3  | 6757    | 0.794413558 | 6781.875  | 6648.375  | 133.5   | 1.020080095 | 0.8157  | 1.017  |
| 94818_at   | 857.5   | 811     | 1060.1  | 1272.7  | 1125.6  | 839.8   | 1349.8  | 1249.2  | 0.392569109 | 1000.325  | 1141.1    | 140.775 | 0.876632197 | 0.4008  | 1.142  |
| 94819_f_at | 1642.4  | 1857.6  | 1994.7  | 2456.4  | 1848.5  | 1785.2  | 2032.9  | 2260    | 0.977044693 | 1987.775  | 1981.65   | 6.125   | 1.003090859 | 0.9729  | 1.004  |
| 94820_r_at | 145.4   | 252.8   | 315.8   | 396.8   | 231.9   | 268     | 252     | 295.5   | 0.788920394 | 277.7     | 261.85    | 15.85   | 1.060530838 | 0.9961  | 1.001  |
| 94821_at   | 1149.2  | 1303.8  | 1619.8  | 1576.7  | 1195.9  | 1248.5  | 1718.9  | 1636.8  | 0.836089035 | 1412.375  | 1450.025  | 37.65   | 0.97403493  | 0.8561  | 1.024  |
| 94822_at   | 13      | 11.9    | 7.7     | 5.4     | 31.9    | 18      | 8.9     | 14.3    | 0.172525457 | 9.5       | 18.275    | 8.775   | 0.519835841 | 0.1206  | 1.834  |
| 94823_at   | 18437.6 | 21405   | 13144.1 | 14895.6 | 16475.4 | 16626.7 | 16288.3 | 16805.3 | 0.833944957 | 16970.575 | 16548.925 | 421.65  | 1.025478996 | 0.9472  | -1.008 |
| 94825_at   | 37.3    | 22.5    | 22.7    | 26.1    | 20.9    | 58.5    | 32.1    | 32.5    | 0.364938895 | 27.15     | 36        | 8.85    | 0.754166667 | 0.3691  | 1.265  |
| 94826_at   | 1398.6  | 1376.7  | 1303.9  | 1021.1  | 1263.5  | 1390.4  | 972.2   | 1021.1  | 0.424489735 | 1275.075  | 1161.8    | 113.275 | 1.09749957  | 0.4237  | -1.101 |
| 94827_at   | 199.1   | 181.9   | 141.4   | 150.2   | 146.5   | 171.4   | 139     | 194.3   | 0.781598389 | 168.15    | 162.8     | 5.35    | 1.032862408 | 0.7846  | -1.032 |
| 94828_at   | 733     | 590.4   | 687.1   | 552.8   | 485.2   | 701.9   | 529.9   | 597.1   | 0.361153294 | 640.825   | 578.525   | 62.3    | 1.107687654 | 0.3458  | -1.111 |
| 94829_at   | 437.4   | 607.4   | 548     | 357.9   | 398.5   | 1005.1  | 409.5   | 387.6   | 0.719690773 | 487.675   | 550.175   | 62.5    | 0.886399782 | 0.8547  | 1.051  |



|            |        |        |        |        |        |        |        |        |             |          |          |         |             |          |        |
|------------|--------|--------|--------|--------|--------|--------|--------|--------|-------------|----------|----------|---------|-------------|----------|--------|
| 94830_at   | 401.1  | 482.9  | 534.9  | 833.1  | 517.3  | 421.6  | 663.8  | 607.6  | 0.927107556 | 563      | 552.575  | 10.425  | 1.018866217 | 0.9802   | 1.005  |
| 94831_at   | 4026.8 | 3631.3 | 3341.6 | 2934.3 | 3769.9 | 3892.9 | 3650.2 | 3446.8 | 0.454626212 | 3483.5   | 3689.95  | 206.45  | 0.944050732 | 0.4121   | 1.065  |
| 94832_at   | 298.1  | 280.8  | 422.6  | 320.1  | 497.8  | 377.9  | 467.2  | 390.1  | 0.054841271 | 330.4    | 433.25   | 102.85  | 0.762608194 | 0.04932  | 1.319  |
| 94833_at   | 2015.3 | 2161.1 | 2441.3 | 1864   | 2572   | 2469.5 | 2959.7 | 2430.9 | 0.030079506 | 2120.425 | 2608.025 | 487.6   | 0.813038602 | 0.02833  | 1.232  |
| 94834_at   | 575.4  | 689.7  | 616.1  | 501.9  | 842.3  | 825    | 633.2  | 708.7  | 0.050128804 | 595.775  | 752.3    | 156.525 | 0.791938057 | 0.04874  | 1.263  |
| 94835_f_at | 2364.1 | 2587.5 | 2497.4 | 2034.8 | 2777.1 | 2386.1 | 2525.2 | 2216.4 | 0.557327893 | 2370.95  | 2476.2   | 105.25  | 0.957495356 | 0.558    | 1.045  |
| 94836_at   | 23.3   | 25.6   | 22.1   | 17.6   | 19.4   | 28.8   | 23.3   | 18.7   | 0.893849592 | 22.15    | 22.55    | 0.4     | 0.982261641 | 0.9248   | 1.013  |
| 94837_at   | 6343.7 | 7102.9 | 5694.6 | 4885.7 | 6692.3 | 6210.1 | 5587.7 | 5504.4 | 0.988799485 | 6006.725 | 5998.625 | 8.1     | 1.001350309 | 0.9597   | 1.005  |
| 94838_r_at | 11.5   | 14.1   | 6.9    | 12.2   | 10.3   | 27.9   | 12.8   | 8.7    | 0.4696898   | 11.175   | 14.925   | 3.75    | 0.748743719 | 0.5038   | 1.239  |
| 94839_at   | 617.1  | 633.5  | 1039.2 | 1072.1 | 749.1  | 802.2  | 1089.9 | 1142   | 0.534160842 | 840.475  | 945.8    | 105.325 | 0.888639247 | 0.4927   | 1.145  |
| 94840_at   | 628.3  | 760.3  | 537.1  | 747.1  | 754.1  | 617.8  | 759.2  | 811.8  | 0.355371811 | 668.2    | 735.725  | 67.525  | 0.908219783 | 0.355    | 1.106  |
| 94841_at   | 3654.3 | 3599.5 | 2667.2 | 2520.1 | 3332.8 | 3191.6 | 2624.6 | 2426.6 | 0.582961415 | 3110.275 | 2893.9   | 216.375 | 1.074769342 | 0.6103   | -1.069 |
| 94842_at   | 2223.9 | 2175.4 | 1958.5 | 1718.8 | 2200.6 | 2150.7 | 2114.2 | 2064.5 | 0.404299277 | 2019.15  | 2132.5   | 113.35  | 0.946846424 | 0.3632   | 1.061  |
| 94843_at   | 265    | 323.6  | 206    | 232.5  | 268.1  | 267.5  | 208.5  | 178.5  | 0.468772042 | 256.775  | 230.65   | 26.125  | 1.113266855 | 0.4672   | -1.114 |
| 94844_at   | 41.9   | 48.3   | 28.4   | 24.6   | 32     | 50.9   | 38     | 33.1   | 0.716312639 | 35.8     | 38.5     | 2.7     | 0.92987013  | 0.6457   | 1.097  |
| 94845_at   | 1870.5 | 1876.8 | 2004.5 | 2417.1 | 1999.5 | 1952.3 | 2309.6 | 2564.4 | 0.426848025 | 2042.225 | 2206.45  | 164.225 | 0.925570487 | 0.4163   | 1.08   |
| 94848_at   | 57.4   | 26.5   | 15.7   | 31.2   | 26.8   | 67.3   | 28.9   | 28.9   | 0.70330418  | 32.7     | 37.975   | 5.275   | 0.861092824 | 0.627    | 1.193  |
| 94849_at   | 10.1   | 11.3   | 10     | 5.6    | 10.4   | 11.7   | 14.2   | 8.3    | 0.321399883 | 9.25     | 11.15    | 1.9     | 0.829596413 | 0.3383   | 1.222  |
| 94850_at   | 602.1  | 717    | 740    | 890.5  | 898.8  | 851    | 873.2  | 901    | 0.09162195  | 737.4    | 881      | 143.6   | 0.837003405 | 0.06078  | 1.206  |
| 94852_at   | 409.4  | 338.6  | 305.3  | 181.5  | 445.1  | 333.2  | 432.5  | 228.9  | 0.487778459 | 308.7    | 359.925  | 51.225  | 0.857678683 | 0.512    | 1.176  |
| 94853_at   | 661.4  | 648.4  | 822.5  | 919.1  | 602.8  | 709.1  | 593.1  | 913.5  | 0.578557122 | 762.85   | 704.625  | 58.225  | 1.082632606 | 0.5456   | -1.088 |
| 94854_g_at | 1017.2 | 959.1  | 1382.7 | 1122.6 | 589.1  | 1235.3 | 854.2  | 1417.5 | 0.6661128   | 1120.4   | 1024.025 | 96.375  | 1.094113913 | 0.5486   | -1.145 |
| 94855_at   | 602.7  | 557    | 473.6  | 453.3  | 474.6  | 487.3  | 492.2  | 480.3  | 0.35869037  | 521.65   | 483.6    | 38.05   | 1.078680728 | 0.3459   | -1.072 |
| 94856_r_at | 22.4   | 6.2    | 19.9   | 28.6   | 5.1    | 34.6   | 13.7   | 8.5    | 0.658396252 | 19.275   | 15.475   | 3.8     | 1.245557351 | 0.547    | -1.404 |
| 94857_at   | 514    | 450.3  | 473.1  | 536.6  | 434.4  | 420.4  | 416.4  | 447.3  | 0.03990251  | 493.5    | 429.625  | 63.875  | 1.148676171 | 0.01879  | -1.147 |
| 94860_at   | 1772   | 1743.7 | 1809.9 | 1617.1 | 2072.1 | 1553.2 | 1722.2 | 1585.7 | 0.9859097   | 1735.675 | 1733.3   | 2.375   | 1.001370219 | 0.922    | 1.007  |
| 94861_at   | 334.5  | 272    | 313.5  | 300.5  | 283.2  | 297.7  | 330.9  | 219.4  | 0.444708084 | 305.125  | 282.8    | 22.325  | 1.078942716 | 0.4209   | -1.088 |
| 94862_i_at | 1671.2 | 2837.1 | 2244.3 | 2095.3 | 3041.6 | 1997.4 | 2462.6 | 2365.2 | 0.461878196 | 2211.975 | 2466.7   | 254.725 | 0.896734504 | 0.4382   | 1.122  |
| 94863_r_at | 533.7  | 399.5  | 485.2  | 288.3  | 473.8  | 426.2  | 332.6  | 434.7  | 0.879581674 | 426.675  | 416.825  | 9.85    | 1.02363102  | 0.9735   | 1.005  |
| 94865_at   | 767.1  | 788.9  | 925    | 725.1  | 838.3  | 713.5  | 798.8  | 790.3  | 0.760106837 | 801.525  | 785.225  | 16.3    | 1.020758381 | 0.7809   | -1.018 |
| 94866_at   | 167.6  | 87.1   | 91.9   | 85.9   | 29.7   | 109.6  | 41     | 113    | 0.285969802 | 108.125  | 73.325   | 34.8    | 1.474599386 | 0.2266   | -1.663 |
| 94868_at   | 2298.3 | 2342.5 | 1779.7 | 1554.7 | 2266.8 | 2381.3 | 1906.2 | 1895.8 | 0.628278006 | 1993.8   | 2112.525 | 118.725 | 0.943799482 | 0.5824   | 1.07   |
| 94869_at   | 223.7  | 185.1  | 230.9  | 228.3  | 220.4  | 186.4  | 217.2  | 212.6  | 0.57702059  | 217      | 209.15   | 7.85    | 1.037532871 | 0.6075   | -1.036 |
| 94870_f_at | 648.1  | 691.1  | 712.7  | 529.8  | 656.7  | 585    | 614.4  | 595.9  | 0.501045163 | 645.425  | 613      | 32.425  | 1.052895595 | 0.5418   | -1.047 |
| 94871_r_at | 622.6  | 832.5  | 868.5  | 1044.2 | 1003.5 | 862.8  | 1014.5 | 1131.6 | 0.175827056 | 841.95   | 1003.1   | 161.15  | 0.839348021 | 0.1717   | 1.206  |
| 94872_at   | 458.6  | 675.7  | 481.4  | 496.4  | 756.6  | 586.9  | 609.3  | 579.7  | 0.158259101 | 528.025  | 633.125  | 105.1   | 0.833998026 | 0.1319   | 1.206  |
| 94874_at   | 32.5   | 11.8   | 2.5    | 12.3   | 7.6    | 51.7   | 25.8   | 13     | 0.441331993 | 14.775   | 24.525   | 9.75    | 0.602446483 | 0.4073   | 1.819  |
| 94875_at   | 817.1  | 1044.3 | 711.6  | 759.8  | 910.8  | 790.1  | 715    | 815.4  | 0.775500177 | 833.2    | 807.825  | 25.375  | 1.031411506 | 0.8156   | 1.024  |
| 94876_f_at | 2106.3 | 2008.1 | 2558.8 | 2194.1 | 2126.5 | 1848.9 | 2308.4 | 2409.6 | 0.808828597 | 2216.825 | 2173.35  | 43.475  | 1.020003681 | 0.8018   | -1.021 |
| 94877_at   | 82.4   | 73.5   | 68.6   | 62.8   | 66.2   | 112.2  | 100.8  | 73.7   | 0.235417784 | 71.825   | 88.225   | 16.4    | 0.814111646 | 0.2213   | 1.207  |
| 94878_at   | 1596.1 | 1593.9 | 1532.8 | 1521.5 | 1523   | 1527.9 | 1584.9 | 1537.7 | 0.4963404   | 1561.075 | 1543.375 | 17.7    | 1.011468373 | 0.4956   | -1.011 |
| 94881_at   | 108.8  | 85.6   | 109.9  | 36.8   | 63.5   | 89.7   | 58     | 99.2   | 0.714812214 | 85.275   | 77.6     | 7.675   | 1.098904639 | 0.9078   | -1.036 |
| 94882_at   | 488.3  | 550.8  | 663.8  | 757.8  | 673.4  | 589.6  | 726    | 709.7  | 0.420594962 | 615.175  | 674.675  | 59.5    | 0.91180939  | 0.3759   | 1.109  |
| 94885_at   | 816.2  | 709.6  | 751.6  | 861.4  | 724.5  | 691    | 895.6  | 869.4  | 0.871337682 | 784.7    | 795.125  | 10.425  | 0.986888854 | 0.9051   | 1.01   |
| 94886_at   | 446.7  | 270.1  | 343.1  | 371.5  | 345.4  | 454.7  | 276.2  | 391    | 0.869693699 | 357.85   | 366.825  | 8.975   | 0.975533292 | 0.8741   | 1.025  |
| 94889_at   | 5624.7 | 5504.3 | 5403.6 | 5553   | 4268.2 | 3852.7 | 3942.9 | 4675.2 | 0.004115852 | 5521.4   | 4184.75  | 1336.65 | 1.319409762 | 0.000759 | -1.323 |
| 94890_at   | 31.3   | 15.7   | 16.2   | 25.7   | 21.6   | 16.6   | 37.5   | 11.6   | 0.955096231 | 22.225   | 21.825   | 0.4     | 1.018327606 | 0.8291   | -1.07  |
| 94891_s_at | 1009.1 | 1486.1 | 722.7  | 660    | 1056.1 | 1139.6 | 538.8  | 652.8  | 0.627588495 | 969.475  | 846.825  | 122.65  | 1.144835119 | 0.631    | -1.14  |
| 94892_r_at | 2610.3 | 2953.5 | 1857.7 | 1589.9 | 2420.6 | 2622.9 | 1712.7 | 1925.8 | 0.837488517 | 2252.85  | 2170.5   | 82.35   | 1.037940567 | 0.9085   | 1.021  |
| 94893_at   | 535.8  | 408.4  | 462.4  | 443.4  | 488    | 607.9  | 664    | 570.8  | 0.042451774 | 462.5    | 582.675  | 120.175 | 0.79375295  | 0.03746  | 1.258  |
| 94895_at   | 649.3  | 734.3  | 885    | 817.2  | 851.2  | 733.8  | 739.4  | 758.2  | 0.989560835 | 771.45   | 770.65   | 0.8     | 1.001038085 | 0.9611   | 1.004  |
| 94896_at   | 467.3  | 460.2  | 638    | 665.9  | 435.9  | 535.5  | 659.2  | 859    | 0.570539963 | 557.85   | 622.4    | 64.55   | 0.89628856  | 0.6177   | 1.097  |
| 94897_at   | 1064.8 | 1327.7 | 841.9  | 785.1  | 1204.2 | 1042.9 | 840.1  | 913    | 0.97505369  | 1004.875 | 1000.05  | 4.825   | 1.004824759 | 0.9595   | 1.008  |
| 94898_at   | 822.8  | 896.1  | 1012   | 842.2  | 921.8  | 872.9  | 854.5  | 834.5  | 0.654714032 | 893.275  | 870.925  | 22.35   | 1.02566237  | 0.6709   | 1.023  |
| 94899_at   | 3845.5 | 3367.2 | 3978   | 4634.6 | 3338.7 | 3563.8 | 4031.1 | 4148.1 | 0.588778333 | 3956.325 | 3770.425 | 185.9   | 1.049304787 | 0.604    | -1.047 |
| 94900_at   | 360    | 343.1  | 236.6  | 249.1  | 269    | 222.5  | 171    | 204.6  | 0.084578599 | 297.2    | 216.775  | 80.425  | 1.371006804 | 0.07233  | -1.365 |



|            |        |        |        |        |        |        |        |        |             |          |          |         |             |          |        |
|------------|--------|--------|--------|--------|--------|--------|--------|--------|-------------|----------|----------|---------|-------------|----------|--------|
| 94902_at   | 699.5  | 496.9  | 674.9  | 724.6  | 455    | 579.7  | 835.7  | 716.3  | 0.982069744 | 648.975  | 646.675  | 2.3     | 1.003556655 | 0.911    | 1.019  |
| 94903_at   | 1791.5 | 2069.6 | 2273.2 | 2185.1 | 1939.8 | 1652.9 | 2215.8 | 2336.7 | 0.822647377 | 2079.85  | 2036.3   | 43.55   | 1.021386829 | 0.7899   | 1.026  |
| 94906_at   | 1386.2 | 2036.4 | 1759.2 | 1098.6 | 1957.7 | 2216   | 2089   | 2222   | 0.070469571 | 1570.1   | 2121.175 | 551.075 | 0.740202954 | 0.05696  | 1.386  |
| 94907_f_at | 3866.3 | 4068   | 2576.4 | 2535.6 | 3864.1 | 3625.5 | 2931.2 | 3067.1 | 0.822862652 | 3261.575 | 3371.975 | 110.4   | 0.967259544 | 0.7347   | 1.052  |
| 94908_r_at | 903.3  | 1018.6 | 735    | 734    | 1118.3 | 1118.5 | 853.3  | 712.7  | 0.436979593 | 847.725  | 950.7    | 102.975 | 0.891685074 | 0.465    | 1.113  |
| 94909_at   | 2398.2 | 3041.7 | 2277.6 | 2161.2 | 2492.8 | 2503.6 | 2053.4 | 2163.3 | 0.498889162 | 2469.675 | 2303.275 | 166.4   | 1.072244956 | 0.5022   | -1.067 |
| 94910_at   | 743.3  | 685.9  | 715.4  | 830    | 690.3  | 659.4  | 875.7  | 869.8  | 0.665462402 | 743.65   | 773.8    | 30.15   | 0.961036444 | 0.7048   | 1.035  |
| 94912_at   | 2106.4 | 2562.1 | 1721.8 | 1468.6 | 2414.9 | 2127.1 | 2161.7 | 1771.2 | 0.5982165   | 1964.725 | 2118.725 | 154     | 0.927314777 | 0.5294   | 1.096  |
| 94913_at   | 1344   | 1129.8 | 1678.7 | 1285.2 | 933.3  | 1092.2 | 1444.4 | 1074.9 | 0.20937485  | 1359.425 | 1136.2   | 223.225 | 1.196466291 | 0.19     | -1.199 |
| 94914_at   | 78.3   | 80.3   | 59     | 25.1   | 17     | 107.6  | 52.7   | 18.2   | 0.654663603 | 60.675   | 48.875   | 11.8    | 1.241432225 | 0.4539   | -1.518 |
| 94915_at   | 5610.9 | 6379   | 3797.6 | 3768.8 | 5212.9 | 5359.1 | 4654.6 | 4564.7 | 0.936438624 | 4889.075 | 4947.825 | 58.75   | 0.988126096 | 0.8023   | 1.037  |
| 94916_at   | 287.8  | 250    | 333.4  | 260.2  | 282    | 348.3  | 306.4  | 294.7  | 0.331666146 | 282.85   | 307.85   | 25      | 0.918791619 | 0.3071   | 1.092  |
| 94917_at   | 70.7   | 105.4  | 100.1  | 122.9  | 90.4   | 97.6   | 130.8  | 104.3  | 0.683268914 | 99.775   | 105.775  | 6       | 0.943275821 | 0.6482   | 1.07   |
| 94918_at   | 608.9  | 552.7  | 723.5  | 505.5  | 638.3  | 585.7  | 701    | 601.1  | 0.5566327   | 597.65   | 631.525  | 33.875  | 0.946360002 | 0.5025   | 1.064  |
| 94920_at   | 256.1  | 189.5  | 249    | 274    | 240.3  | 243.3  | 260.7  | 264.8  | 0.630336203 | 242.15   | 252.275  | 10.125  | 0.959865226 | 0.5797   | 1.051  |
| 94921_i_at | 3.2    | 0.6    | 1.2    | 0.4    | 4.4    | 0.8    | 0.4    | 0.8    | 0.833969195 | 1.35     | 1.6      | 0.25    | 0.84375     | 0.9477   | 1.047  |
| 94922_i_at | 132.9  | 80.5   | 179.6  | 170.4  | 151.6  | 87.3   | 148.2  | 180.3  | 0.974355222 | 140.85   | 141.85   | 1       | 0.9929503   | 0.9396   | 1.019  |
| 94923_f_at | 3066.6 | 3075.1 | 2447.9 | 3470.5 | 3525.7 | 2498.1 | 3707.7 | 3920.7 | 0.340400194 | 3015.025 | 3413.05  | 398.025 | 0.883381433 | 0.3844   | 1.124  |
| 94924_at   | 1357.8 | 1128.2 | 1004.9 | 1195.4 | 932.5  | 785.1  | 1140.1 | 856.3  | 0.06221515  | 1171.575 | 928.5    | 243.075 | 1.261793215 | 0.05855  | -1.267 |
| 94925_at   | 804.6  | 961.4  | 958.8  | 940.8  | 932.3  | 731.8  | 758.3  | 748.1  | 0.087191889 | 916.4    | 792.625  | 123.775 | 1.156158335 | 0.08201  | -1.159 |
| 94927_at   | 5.4    | 1.6    | 4.4    | 2.5    | 7.8    | 7.6    | 1.2    | 3.5    | 0.439523545 | 3.475    | 5.025    | 1.55    | 0.691542289 | 0.6339   | 1.297  |
| 94928_at   | 103.1  | 88     | 101    | 73.4   | 84.4   | 118.3  | 106.1  | 79.3   | 0.640573776 | 91.375   | 97.025   | 5.65    | 0.941767586 | 0.6686   | 1.057  |
| 94929_at   | 751.2  | 842    | 972.7  | 947    | 854.7  | 677.7  | 708.2  | 898.6  | 0.255603232 | 878.225  | 784.8    | 93.425  | 1.119043068 | 0.2559   | -1.121 |
| 94930_at   | 727    | 773.2  | 1136.6 | 984.3  | 972.6  | 769.6  | 1470.8 | 894.1  | 0.531604454 | 905.275  | 1026.775 | 121.5   | 0.88166833  | 0.5427   | 1.118  |
| 94931_at   | 495    | 583.2  | 605.8  | 473.7  | 511.5  | 545    | 577.3  | 434.8  | 0.634981297 | 539.425  | 517.15   | 22.275  | 1.043072609 | 0.6405   | -1.043 |
| 94932_at   | 2614.1 | 2557.3 | 2071.2 | 1905   | 1719.6 | 1593.9 | 1092.8 | 1241.9 | 0.009365479 | 2286.9   | 1412.05  | 874.85  | 1.619560214 | 0.00983  | -1.632 |
| 94933_at   | 1172.9 | 1118.9 | 890.1  | 914.3  | 890.6  | 839.2  | 1101.2 | 954.2  | 0.428145329 | 1024.05  | 946.3    | 77.75   | 1.082162105 | 0.4311   | -1.08  |
| 94934_at   | 1987.4 | 2289.7 | 2203.2 | 1631.7 | 2493.3 | 2367.2 | 3282.4 | 2315.8 | 0.079530993 | 2028     | 2614.675 | 586.675 | 0.775622209 | 0.06302  | 1.287  |
| 94935_at   | 188.8  | 145.9  | 102.4  | 175.7  | 105    | 145.1  | 147.8  | 153.5  | 0.520211433 | 153.2    | 137.85   | 15.35   | 1.11135292  | 0.5991   | -1.094 |
| 94936_at   | 2.6    | 3.2    | 4.7    | 12     | 24.3   | 6.2    | 3.9    | 5.7    | 0.447440207 | 5.625    | 10.025   | 4.4     | 0.561097257 | 0.387    | 1.629  |
| 94937_at   | 305.7  | 431.5  | 356.8  | 307.6  | 452.6  | 326.4  | 316.4  | 300.1  | 0.974534622 | 350.4    | 348.875  | 1.525   | 1.004371193 | 0.9507   | 1.008  |
| 94939_at   | 137.4  | 147.9  | 118.4  | 140.8  | 197.8  | 197    | 158.8  | 158.7  | 0.023936558 | 136.125  | 178.075  | 41.95   | 0.764425102 | 0.01511  | 1.305  |
| 94940_at   | 299.3  | 267.9  | 294.4  | 273.4  | 411.1  | 353.9  | 499.5  | 400.1  | 0.019104337 | 283.75   | 416.15   | 132.4   | 0.681845488 | 0.002638 | 1.457  |
| 94941_at   | 187.4  | 161.5  | 197.5  | 242.8  | 203.9  | 164.6  | 178.8  | 196.9  | 0.584842253 | 197.3    | 186.05   | 11.25   | 1.060467616 | 0.6159   | -1.053 |
| 94942_at   | 898    | 841.6  | 855.9  | 748.6  | 922.5  | 880.4  | 882.5  | 824.7  | 0.316397407 | 836.025  | 877.525  | 41.5    | 0.9527079   | 0.3102   | 1.051  |
| 94944_at   | 330.3  | 303.8  | 292.4  | 254.7  | 237.2  | 286.9  | 212.6  | 292.8  | 0.182046477 | 295.3    | 257.375  | 37.925  | 1.147353084 | 0.1829   | -1.152 |
| 94945_at   | 584.7  | 600.3  | 531.1  | 428.1  | 533.1  | 536.6  | 404.7  | 406.2  | 0.267762341 | 536.05   | 470.15   | 65.9    | 1.140168031 | 0.278    | -1.141 |
| 94946_at   | 222.8  | 216.9  | 260.8  | 251.2  | 161    | 206.5  | 165.3  | 250.7  | 0.14091117  | 237.925  | 195.875  | 42.05   | 1.214677728 | 0.1159   | -1.231 |
| 94947_g_at | 260.1  | 340.6  | 487.5  | 427.7  | 288.6  | 267.1  | 341.8  | 412.1  | 0.423573261 | 378.975  | 327.4    | 51.575  | 1.157529016 | 0.4601   | -1.142 |
| 94948_at   | 1318.3 | 1300.7 | 1104.9 | 1150.1 | 978.7  | 1264.5 | 1025.2 | 1023.1 | 0.135397294 | 1218.5   | 1072.875 | 145.625 | 1.135733427 | 0.1239   | -1.138 |
| 94951_at   | 567.5  | 608.7  | 628.5  | 581.9  | 598.5  | 605    | 707.7  | 602.1  | 0.341531016 | 596.65   | 628.325  | 31.675  | 0.949588191 | 0.3242   | 1.051  |
| 94952_at   | 762    | 660.8  | 1131.5 | 1326.9 | 733.2  | 1115.1 | 1236.2 | 1502.6 | 0.459678136 | 970.3    | 1146.775 | 176.475 | 0.846111923 | 0.464    | 1.19   |
| 94953_at   | 523.6  | 506.9  | 668    | 966.2  | 503    | 473.2  | 748.5  | 753.9  | 0.735510695 | 666.175  | 619.65   | 46.525  | 1.075082708 | 0.7651   | -1.063 |
| 94954_at   | 1531.7 | 1497.3 | 1423.1 | 1256.5 | 1813.8 | 1539.1 | 1732.4 | 1595   | 0.032462968 | 1427.15  | 1670.075 | 242.925 | 0.854542461 | 0.03452  | 1.171  |
| 94955_at   | 95.6   | 72.4   | 88.7   | 159    | 67.9   | 39.8   | 79.4   | 80.4   | 0.149119225 | 103.925  | 66.875   | 37.05   | 1.554018692 | 0.1148   | -1.542 |
| 94956_at   | 502.3  | 550.4  | 487.7  | 446.6  | 495.6  | 487.1  | 413.6  | 451.4  | 0.267731438 | 496.75   | 461.925  | 34.825  | 1.075391027 | 0.2706   | -1.075 |
| 94957_at   | 488.9  | 445.2  | 669.4  | 642.4  | 547.3  | 646.2  | 821.6  | 610.4  | 0.284977061 | 561.475  | 656.375  | 94.9    | 0.855418016 | 0.272    | 1.173  |
| 94958_at   | 54.6   | 80.3   | 188.3  | 208.2  | 153.5  | 118.7  | 141.4  | 148.7  | 0.855141984 | 132.85   | 140.575  | 7.725   | 0.945047128 | 0.5677   | 1.222  |
| 94961_at   | 16.2   | 8.9    | 8.2    | 36.1   | 42.4   | 26.7   | 35.7   | 34.8   | 0.067353531 | 17.35    | 34.9     | 17.55   | 0.49713467  | 0.04921  | 2.4    |
| 94962_g_at | 18.3   | 14.9   | 7.5    | 9.4    | 11.3   | 12.3   | 3.9    | 12.6   | 0.468879045 | 12.525   | 10.025   | 2.5     | 1.249376559 | 0.4949   | -1.288 |
| 94963_at   | 2369   | 2252.1 | 2866.4 | 3357.8 | 1581.6 | 1589.4 | 2401.4 | 2087.5 | 0.050955871 | 2711.325 | 1914.975 | 796.35  | 1.415853993 | 0.04421  | -1.421 |
| 94964_at   | 213.2  | 172.8  | 214.8  | 202.3  | 80     | 143.9  | 196.8  | 140.5  | 0.079401864 | 200.775  | 140.3    | 60.475  | 1.431040627 | 0.08256  | -1.498 |
| 94966_at   | 758    | 870.8  | 862.5  | 643.6  | 924.1  | 950.4  | 859.7  | 795.9  | 0.179019149 | 783.725  | 882.525  | 98.8    | 0.888048497 | 0.178    | 1.132  |
| 94967_at   | 547.8  | 394.8  | 494.1  | 603.7  | 338.7  | 477.5  | 427.8  | 479    | 0.205549745 | 510.1    | 430.75   | 79.35   | 1.184213581 | 0.2215   | -1.181 |
| 94968_at   | 1787.8 | 1779.5 | 1881.2 | 1662.2 | 1948.5 | 1568.6 | 1814.8 | 1662   | 0.772115497 | 1777.675 | 1748.475 | 29.2    | 1.016700267 | 0.7369   | -1.019 |
| 94969_at   | 677.9  | 635.5  | 560.1  | 453.7  | 325.4  | 496    | 465.9  | 396.9  | 0.04379967  | 581.8    | 421.05   | 160.75  | 1.381783636 | 0.04561  | -1.384 |



|            |        |        |        |        |        |        |        |        |             |          |          |         |             |          |        |
|------------|--------|--------|--------|--------|--------|--------|--------|--------|-------------|----------|----------|---------|-------------|----------|--------|
| 94970_at   | 192.4  | 146.6  | 251.5  | 221.8  | 214.6  | 232.2  | 227.9  | 228.4  | 0.3870243   | 203.075  | 225.775  | 22.7    | 0.899457424 | 0.3276   | 1.133  |
| 94971_at   | 325.8  | 368.1  | 252.6  | 278.3  | 278.1  | 246    | 238.8  | 272.2  | 0.161150073 | 306.2    | 258.775  | 47.425  | 1.183267317 | 0.1307   | -1.173 |
| 94972_at   | 671.4  | 474.7  | 542.8  | 923.4  | 434.5  | 549.8  | 791.5  | 631.4  | 0.694950428 | 653.075  | 601.8    | 51.275  | 1.085202725 | 0.7174   | -1.076 |
| 94973_at   | 627.7  | 688.8  | 744.6  | 890.3  | 658.8  | 644.1  | 786.5  | 941.9  | 0.830361431 | 737.85   | 757.825  | 19.975  | 0.973641672 | 0.8481   | 1.023  |
| 94975_at   | 457.5  | 444.2  | 543.7  | 594.2  | 627.4  | 472.1  | 625.3  | 634.7  | 0.183298889 | 509.9    | 589.875  | 79.975  | 0.864420428 | 0.196    | 1.157  |
| 94976_at   | 909.5  | 919.5  | 1082.9 | 1351.6 | 942.2  | 790.4  | 1092.1 | 1157.9 | 0.614226265 | 1065.875 | 995.65   | 70.225  | 1.070531813 | 0.6212   | -1.068 |
| 94977_at   | 789    | 790    | 1047.8 | 729.7  | 874.8  | 662.1  | 967.3  | 1142.2 | 0.578208552 | 839.125  | 911.6    | 72.475  | 0.920496928 | 0.6159   | 1.076  |
| 94978_at   | 1503.9 | 1417.3 | 1617.4 | 1753.7 | 1423.8 | 1162.2 | 1442.3 | 1386.8 | 0.06617719  | 1573.075 | 1353.775 | 219.3   | 1.161991468 | 0.06926  | -1.163 |
| 94979_at   | 695.8  | 691.6  | 929.1  | 1081.1 | 922.7  | 715    | 914.6  | 1042.1 | 0.689730835 | 849.4    | 898.6    | 49.2    | 0.945248164 | 0.6456   | 1.068  |
| 94980_at   | 455.2  | 394.2  | 347.4  | 334.8  | 359.2  | 383.4  | 385.8  | 384.8  | 0.879051181 | 382.9    | 378.3    | 4.6     | 1.012159662 | 0.9443   | 1.005  |
| 94981_i_at | 427.5  | 502.6  | 328.9  | 354.2  | 454.8  | 354.6  | 356.7  | 375.5  | 0.711751137 | 403.3    | 385.4    | 17.9    | 1.046445252 | 0.7539   | -1.037 |
| 94982_f_at | 823.1  | 1143.8 | 622.4  | 588.6  | 1056.1 | 685.8  | 548.4  | 770    | 0.865840363 | 794.475  | 765.075  | 29.4    | 1.038427605 | 0.8878   | -1.031 |
| 94983_at   | 588.2  | 441    | 378.3  | 409.7  | 454    | 423.3  | 450.7  | 432.1  | 0.780357702 | 454.3    | 440.025  | 14.275  | 1.032441339 | 0.8602   | -1.018 |
| 94985_at   | 872.5  | 898.9  | 1222.6 | 1124.9 | 992.1  | 862.3  | 1266.9 | 1111.8 | 0.822098794 | 1029.725 | 1058.275 | 28.55   | 0.973022135 | 0.8204   | 1.028  |
| 94986_at   | 265.8  | 343.7  | 127.6  | 206.8  | 183.7  | 227.9  | 136.9  | 212.4  | 0.409901373 | 235.975  | 190.225  | 45.75   | 1.240504666 | 0.5029   | -1.186 |
| 94987_at   | 275.7  | 250.2  | 182.9  | 181.4  | 262.9  | 238.7  | 192.4  | 140.7  | 0.713670848 | 222.55   | 208.675  | 13.875  | 1.066490955 | 0.6854   | -1.077 |
| 94988_at   | 41.1   | 76     | 78     | 51     | 65.3   | 96.8   | 61.9   | 93.3   | 0.21815719  | 61.525   | 79.325   | 17.8    | 0.775606681 | 0.2174   | 1.309  |
| 94989_at   | 1024.9 | 929    | 1396   | 1359.5 | 1135.4 | 1044   | 1556.2 | 1513.8 | 0.471042704 | 1177.35  | 1312.35  | 135     | 0.897131101 | 0.4761   | 1.115  |
| 94990_at   | 758.4  | 808.2  | 649.6  | 540.2  | 683.7  | 556.1  | 631.7  | 672.4  | 0.464518634 | 689.1    | 635.975  | 53.125  | 1.083533158 | 0.5057   | -1.074 |
| 94991_at   | 200    | 194    | 309.8  | 251.3  | 186.8  | 171.6  | 204.6  | 226    | 0.228824568 | 238.775  | 197.25   | 41.525  | 1.210519645 | 0.2028   | -1.195 |
| 94992_at   | 1440   | 1492.4 | 1358.5 | 1315.5 | 1421   | 1506.8 | 1522.5 | 1318.6 | 0.53382124  | 1401.6   | 1442.225 | 40.625  | 0.971831718 | 0.5417   | 1.029  |
| 94993_f_at | 40.6   | 21.7   | 26.2   | 37.1   | 41     | 41.5   | 53.3   | 28.9   | 0.194524509 | 31.4     | 41.175   | 9.775   | 0.762598664 | 0.1985   | 1.322  |
| 94994_at   | 5.2    | 3      | 2      | 5.1    | 2      | 6.8    | 4      | 4.6    | 0.693478304 | 3.825    | 4.35     | 0.525   | 0.879310345 | 0.7806   | 1.107  |
| 94995_at   | 241.4  | 264.6  | 263.9  | 266.9  | 432    | 482.2  | 372.1  | 389.6  | 0.005675245 | 259.2    | 418.975  | 159.775 | 0.618652664 | 0.000263 | 1.61   |
| 94997_at   | 311.9  | 387.6  | 341.4  | 299.4  | 469    | 415.3  | 324.4  | 342.3  | 0.234251566 | 335.075  | 387.75   | 52.675  | 0.86415216  | 0.2228   | 1.15   |
| 94998_at   | 348.4  | 340.7  | 461.5  | 463.9  | 381.6  | 409.5  | 454.4  | 425.1  | 0.725905551 | 403.625  | 417.65   | 14.025  | 0.966419251 | 0.6594   | 1.044  |
| 94999_at   | 83.9   | 69.5   | 69.8   | 74.1   | 56     | 126.8  | 77.6   | 61.2   | 0.735106777 | 74.325   | 80.4     | 6.075   | 0.924440299 | 0.8891   | 1.028  |
| 95000_g_at | 123.3  | 109.8  | 93.6   | 114.9  | 135    | 125    | 80     | 116.1  | 0.800320907 | 110.4    | 114.025  | 3.625   | 0.968208726 | 0.8939   | 1.018  |
| 95001_at   | 414.3  | 491.6  | 706.8  | 742    | 657.2  | 412.9  | 801.8  | 770.5  | 0.568715211 | 588.675  | 660.6    | 71.925  | 0.891121708 | 0.607    | 1.119  |
| 95002_at   | 615.3  | 643.4  | 812.5  | 811.7  | 593.9  | 562.5  | 501.4  | 691    | 0.094121497 | 720.725  | 587.2    | 133.525 | 1.227392711 | 0.08763  | -1.226 |
| 95003_at   | 1486.6 | 1453.7 | 1310.4 | 1433.9 | 1551.4 | 1314   | 1185.7 | 1452.2 | 0.634350618 | 1421.15  | 1375.825 | 45.325  | 1.03294387  | 0.5952   | -1.037 |
| 95004_at   | 635    | 447.7  | 597    | 677.2  | 622.1  | 620.5  | 593.9  | 622.5  | 0.64633459  | 589.225  | 614.75   | 25.525  | 0.958479057 | 0.5783   | 1.056  |
| 95007_at   | 101.6  | 130    | 163.9  | 184.2  | 131    | 111.2  | 150.9  | 165.7  | 0.819656528 | 144.925  | 139.7    | 5.225   | 1.037401575 | 0.8912   | -1.023 |
| 95009_at   | 127.2  | 136    | 129    | 136.8  | 141    | 102    | 153.7  | 125.6  | 0.89161081  | 132.25   | 130.575  | 1.675   | 1.012827877 | 0.8025   | 1.024  |
| 95010_at   | 272.1  | 256.5  | 305.2  | 428.5  | 345.8  | 300.2  | 332.3  | 445.5  | 0.451767265 | 315.575  | 355.95   | 40.375  | 0.886571148 | 0.3948   | 1.139  |
| 95011_at   | 651.4  | 690.7  | 762.4  | 463.9  | 680.3  | 615.2  | 433.6  | 547.1  | 0.412032645 | 642.1    | 569.05   | 73.05   | 1.128371848 | 0.4468   | -1.125 |
| 95012_at   | 996.4  | 789.9  | 1205.4 | 962.6  | 906.3  | 1036.2 | 803.5  | 1026.1 | 0.671904307 | 988.575  | 943.025  | 45.55   | 1.048302007 | 0.7089   | -1.042 |
| 95014_at   | 1096.6 | 861.8  | 862.6  | 790.4  | 835.7  | 1132.8 | 591.4  | 779    | 0.624674155 | 902.85   | 834.725  | 68.125  | 1.081613705 | 0.5418   | -1.103 |
| 95015_at   | 44.1   | 79.3   | 131.8  | 120.2  | 106.3  | 78.2   | 119.6  | 93.8   | 0.809644206 | 93.85    | 99.475   | 5.625   | 0.943453129 | 0.6415   | 1.139  |
| 95016_at   | 1666.5 | 1639.6 | 1697.6 | 1371.1 | 2140.8 | 1768.1 | 2314   | 1771.9 | 0.051848983 | 1593.7   | 1998.7   | 405     | 0.797368289 | 0.03793  | 1.25   |
| 95018_r_at | 591.6  | 1106.4 | 1218.6 | 1110.7 | 1280.8 | 941.9  | 771.1  | 416.2  | 0.525934921 | 1006.825 | 852.5    | 154.325 | 1.181026393 | 0.5021   | -1.23  |
| 95019_at   | 654.1  | 706.7  | 602.9  | 480.4  | 881.1  | 845.6  | 609.5  | 581.4  | 0.253068693 | 611.025  | 729.4    | 118.375 | 0.837709076 | 0.2598   | 1.185  |
| 95020_at   | 153    | 207.8  | 324.1  | 288.6  | 246.6  | 219.6  | 253.5  | 306.6  | 0.77221039  | 243.375  | 256.575  | 13.2    | 0.948553055 | 0.6522   | 1.091  |
| 95021_at   | 1057   | 1754.8 | 1983.9 | 1826.1 | 2016.8 | 1774.5 | 1363.1 | 1686.7 | 0.831916856 | 1655.45  | 1710.275 | 54.825  | 0.967943752 | 0.7683   | 1.052  |
| 95022_at   | 1797.7 | 2024.4 | 1646.5 | 1343.6 | 1793.6 | 2197.1 | 1522.4 | 2538.8 | 0.294216005 | 1703.05  | 2012.975 | 309.925 | 0.846036339 | 0.3038   | 1.173  |
| 95023_at   | 2109.3 | 2048.2 | 2400.8 | 2633.8 | 2054.8 | 1869   | 2013.5 | 2269   | 0.182366409 | 2298.025 | 2051.575 | 246.45  | 1.120127219 | 0.1691   | -1.117 |
| 95024_at   | 6.5    | 42.1   | 16.7   | 11.2   | 79.2   | 18     | 19.4   | 69.4   | 0.197459528 | 19.125   | 46.5     | 27.375  | 0.411290323 | 0.158    | 2.468  |
| 95025_at   | 621.3  | 611    | 594.1  | 665    | 654.3  | 783.3  | 683.7  | 689.3  | 0.057809593 | 622.85   | 702.65   | 79.8    | 0.886429944 | 0.03977  | 1.127  |
| 95026_at   | 212.2  | 208.2  | 201.4  | 170    | 190.1  | 153.7  | 187.5  | 146.6  | 0.10369178  | 197.95   | 169.475  | 28.475  | 1.168018882 | 0.1088   | -1.171 |
| 95027_at   | 263.1  | 273.7  | 406.1  | 449.1  | 266.5  | 302.8  | 374.2  | 387.8  | 0.793829863 | 348      | 332.825  | 15.175  | 1.045594532 | 0.8655   | 1.029  |
| 95028_r_at | 737.8  | 722.6  | 839.8  | 942.1  | 1091.8 | 931.4  | 1381.4 | 1070.6 | 0.038423246 | 810.575  | 1118.8   | 308.225 | 0.724503933 | 0.02109  | 1.374  |
| 95029_at   | 325.4  | 369.1  | 345.3  | 533.3  | 469.8  | 275.8  | 410.7  | 433.2  | 0.950744903 | 393.275  | 397.375  | 4.1     | 0.98968229  | 0.9511   | 1.01   |
| 95030_at   | 1052.1 | 1117.2 | 788.1  | 437.5  | 1293.6 | 884.8  | 824.4  | 734.6  | 0.680996306 | 848.725  | 934.35   | 85.625  | 0.908358752 | 0.6062   | 1.144  |
| 95031_at   | 75.1   | 78.5   | 98.9   | 116.1  | 82.5   | 93     | 127.7  | 120.6  | 0.376614967 | 92.15    | 105.95   | 13.8    | 0.869749882 | 0.3764   | 1.149  |
| 95032_at   | 1886.9 | 1614.6 | 1902.7 | 1727.8 | 1709.8 | 1556.1 | 1677.3 | 1441   | 0.089168357 | 1783     | 1596.05  | 186.95  | 1.117132922 | 0.09143  | -1.117 |
| 95033_at   | 741.4  | 928.9  | 741    | 858.3  | 1150.9 | 919.3  | 710.9  | 958.3  | 0.304691139 | 817.4    | 934.85   | 117.45  | 0.874364871 | 0.3168   | 1.133  |



|            |         |         |        |        |         |         |         |        |              |          |           |         |             |          |        |
|------------|---------|---------|--------|--------|---------|---------|---------|--------|--------------|----------|-----------|---------|-------------|----------|--------|
| 95034_f_at | 256     | 290     | 278.4  | 381.9  | 302.4   | 262.6   | 299.9   | 377    | 0.816247972  | 301.575  | 310.475   | 8.9     | 0.971334246 | 0.7879   | 1.033  |
| 95035_at   | 663.2   | 779.1   | 916    | 858.8  | 674.5   | 799.6   | 677     | 855.1  | 0.486819527  | 804.275  | 751.55    | 52.725  | 1.070155013 | 0.5019   | -1.068 |
| 95036_at   | 57.3    | 25.3    | 29.5   | 116.5  | 134.8   | 166.9   | 126     | 82.1   | 0.043521723  | 57.15    | 127.45    | 70.3    | 0.448411142 | 0.04465  | 2.612  |
| 95037_at   | 662.3   | 622.5   | 863.8  | 887.7  | 787.1   | 800.1   | 724.1   | 799.5  | 0.806484975  | 759.075  | 777.7     | 18.625  | 0.976051177 | 0.7169   | 1.036  |
| 95040_at   | 87.5    | 84.1    | 163.1  | 201.4  | 100.2   | 110.7   | 179.3   | 183.8  | 0.803909704  | 134.025  | 143.5     | 9.475   | 0.933972125 | 0.7165   | 1.109  |
| 95041_at   | 581.4   | 629.9   | 403    | 452    | 552.2   | 493.6   | 523.3   | 454.4  | 0.8611111034 | 516.575  | 505.875   | 10.7    | 1.02115147  | 0.9509   | 1.007  |
| 95042_at   | 2059.6  | 1799.1  | 1794.5 | 1418.8 | 2023.4  | 2152.6  | 1878.7  | 1567.3 | 0.47924933   | 1768     | 1905.5    | 137.5   | 0.927840462 | 0.4863   | 1.08   |
| 95043_at   | 42      | 23.6    | 21.6   | 17.3   | 32      | 42      | 22.9    | 32.9   | 0.385560652  | 26.125   | 32.45     | 6.325   | 0.805084746 | 0.3091   | 1.285  |
| 95044_at   | 1654    | 1935.7  | 1290.7 | 1479.4 | 1782.4  | 1311    | 1320.4  | 1466.2 | 0.521546215  | 1589.95  | 1470      | 119.95  | 1.081598639 | 0.5257   | -1.078 |
| 95045_at   | 938.8   | 1031.2  | 1003   | 1364.4 | 1002.4  | 870.4   | 1033.2  | 1109.8 | 0.49189884   | 1084.35  | 1003.95   | 80.4    | 1.08008367  | 0.4965   | -1.073 |
| 95046_s_at | 894.2   | 793.9   | 901    | 730.7  | 1007.8  | 702.7   | 664.9   | 650.9  | 0.475130455  | 829.95   | 756.575   | 73.375  | 1.096983115 | 0.3906   | -1.111 |
| 95048_at   | 98      | 38.2    | 57.4   | 81     | 80.5    | 138.4   | 111     | 96.6   | 0.079351515  | 68.65    | 106.625   | 37.975  | 0.643845252 | 0.08812  | 1.619  |
| 95049_at   | 8890.8  | 10541   | 5607.8 | 5250.7 | 8151.6  | 7229.6  | 5062.4  | 5936.3 | 0.534122807  | 7572.575 | 6594.975  | 977.6   | 1.148234072 | 0.6011   | -1.117 |
| 95050_at   | 1009.2  | 800     | 955.7  | 916.7  | 683.7   | 787     | 1038.2  | 882.2  | 0.444980926  | 920.4    | 847.775   | 72.625  | 1.085665418 | 0.4073   | -1.095 |
| 95052_at   | 532.6   | 613.3   | 509.9  | 534.9  | 639     | 631.2   | 627.8   | 648    | 0.026880126  | 547.675  | 636.5     | 88.825  | 0.860447761 | 0.009414 | 1.165  |
| 95053_s_at | 3649.2  | 4106    | 2553.2 | 2214.4 | 3378.6  | 3107.5  | 2212.2  | 2324.5 | 0.511026556  | 3130.7   | 2755.7    | 375     | 1.136081576 | 0.5534   | -1.119 |
| 95054_at   | 817.8   | 773.7   | 817.7  | 921.9  | 878.1   | 757.6   | 979     | 867.7  | 0.521226907  | 832.775  | 870.6     | 37.825  | 0.956552952 | 0.5342   | 1.043  |
| 95056_r_at | 21.8    | 37.3    | 21.3   | 39.9   | 32.1    | 30.4    | 23.1    | 13.6   | 0.448887284  | 30.075   | 24.8      | 5.275   | 1.212701613 | 0.4617   | -1.226 |
| 95057_at   | 763.5   | 738.8   | 827.3  | 585.9  | 892.5   | 622.4   | 643.5   | 569.9  | 0.616676432  | 728.875  | 682.075   | 46.8    | 1.068614155 | 0.5713   | -1.076 |
| 95058_f_at | 962.2   | 1252.8  | 1211.9 | 1370   | 1583.7  | 1081.3  | 1314.8  | 1359.1 | 0.352267526  | 1199.225 | 1334.725  | 135.5   | 0.89848096  | 0.3665   | 1.112  |
| 95059_at   | 3410.1  | 3426.7  | 3160   | 2947.6 | 3720.2  | 3603    | 3971.4  | 3745.3 | 0.011316869  | 3236.1   | 3759.975  | 523.875 | 0.860670616 | 0.01024  | 1.163  |
| 95060_at   | 32.3    | 37.4    | 38.9   | 44     | 18.2    | 36.4    | 34.5    | 49.1   | 0.6247229    | 38.15    | 34.55     | 3.6     | 1.104196816 | 0.5118   | -1.165 |
| 95061_at   | 202.2   | 245.3   | 243.6  | 308    | 249.8   | 159.9   | 266     | 362    | 0.845522542  | 249.775  | 259.425   | 9.65    | 0.962802351 | 0.9667   | -1.008 |
| 95062_at   | 151.3   | 222.3   | 304.1  | 233.5  | 268.9   | 273.7   | 289.5   | 242.8  | 0.28697428   | 227.8    | 268.725   | 40.925  | 0.847706763 | 0.2407   | 1.213  |
| 95063_at   | 1320.3  | 902.5   | 1089.8 | 1059.5 | 857.8   | 813     | 915.7   | 988.8  | 0.099790857  | 1093.025 | 893.825   | 199.2   | 1.222862417 | 0.07065  | -1.215 |
| 95064_at   | 12526.1 | 15113.7 | 9993.7 | 9423.3 | 12841.5 | 12239.4 | 10364.2 | 10481  | 0.853885074  | 11764.2  | 11481.525 | 282.675 | 1.024619987 | 0.9317   | 1.011  |
| 95065_at   | 514.2   | 454.1   | 530.8  | 487.2  | 558.9   | 570.3   | 609.9   | 636.4  | 0.007453745  | 496.575  | 593.875   | 97.3    | 0.836160808 | 0.00761  | 1.196  |
| 95066_at   | 1029.8  | 1055.6  | 970.1  | 921.5  | 1301.2  | 979.7   | 931.1   | 998.6  | 0.550974343  | 994.25   | 1052.65   | 58.4    | 0.944520971 | 0.5626   | 1.051  |
| 95067_at   | 641.1   | 708.6   | 634.8  | 499.1  | 701.3   | 616.1   | 510.6   | 552.4  | 0.684327251  | 620.9    | 595.1     | 25.8    | 1.043354058 | 0.6958   | -1.042 |
| 95068_at   | 541.5   | 416.9   | 460.9  | 364.2  | 429.9   | 519.5   | 477.4   | 390    | 0.865391139  | 445.875  | 454.2     | 8.325   | 0.98167107  | 0.8323   | -1.023 |
| 95069_at   | 3708.4  | 2348.6  | 2991.2 | 2338.8 | 3099.2  | 2171.1  | 2662    | 2533.2 | 0.569078357  | 2846.75  | 2616.375  | 230.375 | 1.088051216 | 0.5985   | -1.076 |
| 95070_at   | 618.9   | 653.9   | 822.9  | 666.3  | 733.6   | 735.8   | 976.5   | 828.7  | 0.131655134  | 690.5    | 818.65    | 128.15  | 0.843461797 | 0.1149   | 1.185  |
| 95071_at   | 184.9   | 205     | 204.6  | 246.6  | 149.2   | 257     | 244.5   | 218.2  | 0.810364828  | 210.275  | 217.225   | 6.95    | 0.968005524 | 0.9072   | 1.017  |
| 95072_at   | 5051.8  | 5833.6  | 4290.6 | 5288.8 | 5219.7  | 5072.4  | 4347.5  | 5369   | 0.782034524  | 5116.2   | 5002.15   | 114.05  | 1.022800196 | 0.8123   | 1.02   |
| 95073_at   | 4.9     | 3.4     | 5.9    | 18.9   | 8       | 23.7    | 11.7    | 15.1   | 0.243239932  | 8.275    | 14.625    | 6.35    | 0.565811966 | 0.147    | 2.068  |
| 95074_at   | 542.1   | 955.1   | 780.9  | 905.5  | 870.1   | 1003.2  | 849.3   | 947    | 0.288215742  | 795.9    | 917.4     | 121.5   | 0.867560497 | 0.2681   | 1.177  |
| 95075_at   | 202.1   | 149.9   | 178.2  | 195.2  | 213.7   | 210.4   | 196.8   | 212.4  | 0.098799128  | 181.35   | 208.325   | 26.975  | 0.870514821 | 0.08295  | 1.155  |
| 95076_at   | 2305.7  | 1931.6  | 2004.6 | 1549.4 | 1803.3  | 2063.6  | 1628.7  | 1732.9 | 0.473009271  | 1947.825 | 1807.125  | 140.7   | 1.077858477 | 0.5016   | -1.071 |
| 95077_at   | 626     | 517.5   | 694.3  | 732    | 670.4   | 661     | 880.9   | 776.2  | 0.185342981  | 642.45   | 747.125   | 104.675 | 0.859896269 | 0.1864   | 1.165  |
| 95078_at   | 207     | 187.2   | 246.2  | 254.1  | 190.7   | 196.1   | 244     | 256.2  | 0.937670188  | 223.625  | 221.75    | 1.875   | 1.008455468 | 0.933    | 1.009  |
| 95079_at   | 5450.5  | 5670.8  | 5027.5 | 4815.1 | 5784.4  | 5283.8  | 5631.9  | 5699.8 | 0.172720365  | 5240.975 | 5599.975  | 359     | 0.935892571 | 0.1598   | 1.07   |
| 95081_at   | 269.4   | 413.1   | 288.5  | 319.7  | 374.9   | 411.1   | 304.7   | 381.6  | 0.293655778  | 322.675  | 368.075   | 45.4    | 0.876655573 | 0.2657   | 1.15   |
| 95082_at   | 1310.8  | 1480.3  | 1271.6 | 1810.2 | 1364.6  | 991.7   | 1643.2  | 1856.3 | 0.985455156  | 1468.225 | 1463.95   | 4.275   | 1.002920182 | 0.905    | -1.02  |
| 95083_at   | 575.6   | 587.8   | 669.1  | 733.5  | 341.3   | 400     | 792.3   | 644    | 0.437345389  | 641.5    | 544.4     | 97.1    | 1.178361499 | 0.3318   | -1.242 |
| 95084_f_at | 2154.4  | 2251.6  | 1781.5 | 1845   | 2590.4  | 1997.1  | 1566.6  | 2143.3 | 0.794798218  | 2008.125 | 2074.35   | 66.225  | 0.968074337 | 0.8627   | 1.022  |
| 95085_r_at | 37.7    | 38.7    | 22.3   | 20.8   | 22.3    | 26.3    | 39.8    | 34.9   | 0.884390751  | 29.875   | 30.825    | 0.95    | 0.96918086  | 0.8384   | 1.046  |
| 95086_at   | 2096.7  | 2217.8  | 2472.9 | 2241.9 | 2223.9  | 2109.9  | 2132.4  | 2544.2 | 0.971682598  | 2257.325 | 2252.6    | 4.725   | 1.002097576 | 0.956    | 1.003  |
| 95090_at   | 1522.1  | 1291.4  | 1292.3 | 1285.7 | 1100.6  | 1466.8  | 1333    | 1251.6 | 0.557979818  | 1347.875 | 1288      | 59.875  | 1.046486801 | 0.5341   | -1.049 |
| 95091_at   | 2909.8  | 2731.6  | 2246   | 1709   | 2494.5  | 2546.9  | 2064.3  | 2003.2 | 0.706958374  | 2399.1   | 2277.225  | 121.875 | 1.053519086 | 0.7909   | -1.038 |
| 95092_at   | 514.3   | 686.8   | 936.6  | 985.6  | 1024.6  | 649     | 979.3   | 880.5  | 0.48901109   | 780.825  | 883.35    | 102.525 | 0.883936152 | 0.4692   | 1.152  |
| 95093_at   | 264.3   | 250.3   | 349    | 309.1  | 257     | 316.9   | 349.5   | 285.5  | 0.773399826  | 293.175  | 302.225   | 9.05    | 0.970055422 | 0.7579   | 1.033  |
| 95094_g_at | 257.2   | 242.5   | 391.7  | 308.9  | 237.7   | 296     | 382.2   | 361.2  | 0.697257707  | 300.075  | 319.275   | 19.2    | 0.939863754 | 0.694    | 1.065  |
| 95095_at   | 514.1   | 523.1   | 598    | 573.5  | 601.7   | 533.3   | 509.6   | 775.8  | 0.455003347  | 552.175  | 605.1     | 52.925  | 0.912535118 | 0.4596   | 1.083  |
| 95096_at   | 1965.5  | 2621.3  | 3305.3 | 4026.4 | 2639.6  | 2066.8  | 3148.9  | 2958.2 | 0.608273159  | 2979.625 | 2703.375  | 276.25  | 1.102187081 | 0.6921   | -1.078 |
| 95097_at   | 1905.5  | 1898.5  | 1609.9 | 1889.9 | 1971.3  | 1667.8  | 1741.4  | 1787.6 | 0.7381799    | 1825.95  | 1792.025  | 33.925  | 1.018931098 | 0.749    | 1.018  |
| 95098_at   | 850.8   | 842.1   | 1030.2 | 1003.4 | 762.3   | 760.1   | 1081.8  | 899.4  | 0.564967009  | 931.625  | 875.9     | 55.725  | 1.063620276 | 0.5176   | -1.071 |



|            |        |        |        |        |        |        |        |        |             |          |          |         |             |         |        |
|------------|--------|--------|--------|--------|--------|--------|--------|--------|-------------|----------|----------|---------|-------------|---------|--------|
| 95100_at   | 8101.9 | 6890.9 | 5437   | 5601.9 | 6289.6 | 6837.5 | 6089   | 5847.3 | 0.732968323 | 6507.925 | 6265.85  | 242.075 | 1.038634024 | 0.8007  | -1.027 |
| 95101_at   | 317.3  | 432.5  | 489.6  | 496.4  | 664.4  | 520.3  | 590.2  | 498.8  | 0.05320256  | 433.95   | 568.425  | 134.475 | 0.763425254 | 0.06319 | 1.322  |
| 95102_at   | 1344.3 | 1204.7 | 1645.1 | 1345.2 | 1378.1 | 1494.4 | 1695.4 | 1503   | 0.291554061 | 1384.825 | 1517.725 | 132.9   | 0.91243473  | 0.2661  | 1.1    |
| 95103_at   | 939.7  | 1042.2 | 1031.8 | 920.2  | 1222   | 998.3  | 1060   | 1109.3 | 0.098636535 | 983.475  | 1097.4   | 113.925 | 0.896186441 | 0.08764 | 1.114  |
| 95104_at   | 937.9  | 905    | 859.6  | 818.1  | 857.1  | 850.3  | 867.1  | 786.9  | 0.263468782 | 880.15   | 840.35   | 39.8    | 1.047361219 | 0.2646  | -1.047 |
| 95105_at   | 3102.8 | 3188.5 | 3043.3 | 3165.8 | 3197.3 | 2710.4 | 2870.6 | 3213.2 | 0.386666647 | 3125.1   | 2997.875 | 127.225 | 1.042438394 | 0.3467  | -1.045 |
| 95108_at   | 55.4   | 24     | 13.4   | 42.7   | 10.6   | 22     | 19.2   | 64.9   | 0.770553124 | 33.875   | 29.175   | 4.7     | 1.161096829 | 0.6415  | -1.273 |
| 95109_at   | 1964.1 | 1886.9 | 1789.3 | 1484.6 | 1995.6 | 1512.9 | 1563.2 | 1701.1 | 0.581157184 | 1781.225 | 1693.2   | 88.025  | 1.051987361 | 0.5811  | -1.052 |
| 95110_at   | 693.3  | 662.6  | 609.3  | 500.1  | 522    | 625.4  | 543.5  | 508.3  | 0.23996881  | 616.325  | 549.8    | 66.525  | 1.120998545 | 0.2469  | -1.116 |
| 95111_i_at | 10.4   | 10.6   | 14.7   | 18.9   | 26.4   | 8.6    | 27.5   | 8      | 0.529278697 | 13.65    | 17.625   | 3.975   | 0.774468085 | 0.7564  | 1.127  |
| 95112_f_at | 356.4  | 481.5  | 391    | 319.8  | 484.6  | 441.8  | 425.2  | 328.6  | 0.51742622  | 387.175  | 420.05   | 32.875  | 0.921735508 | 0.5154  | 1.087  |
| 95113_at   | 65.3   | 38.7   | 40.7   | 49.8   | 28.6   | 72.8   | 53.6   | 60.8   | 0.651883817 | 48.625   | 53.95    | 5.325   | 0.901297498 | 0.7776  | 1.072  |
| 95114_s_at | 1914.6 | 1600.4 | 1681.8 | 1191.7 | 1579.5 | 1655.6 | 1323.3 | 1497.6 | 0.642503817 | 1597.125 | 1514     | 83.125  | 1.054904227 | 0.7158  | -1.043 |
| 95117_at   | 967.2  | 1011.1 | 1086.9 | 1097   | 1052.8 | 1034.9 | 1360.3 | 1190.3 | 0.218248195 | 1040.55  | 1159.575 | 119.025 | 0.897354634 | 0.1907  | 1.109  |
| 95118_r_at | 2389.5 | 2556   | 2003.2 | 2322.8 | 2920.1 | 2790   | 2434.7 | 2539.7 | 0.070433188 | 2317.875 | 2671.125 | 353.25  | 0.867752352 | 0.07401 | 1.154  |
| 95119_at   | 426.2  | 480.2  | 406.9  | 558.7  | 489.8  | 415.8  | 462.7  | 633.5  | 0.597509681 | 468      | 500.45   | 32.45   | 0.935158357 | 0.6042  | 1.064  |
| 95120_at   | 57.3   | 70.8   | 71.3   | 82.2   | 76.4   | 126    | 81.8   | 99     | 0.103891625 | 70.4     | 95.8     | 25.4    | 0.734864301 | 0.06961 | 1.345  |
| 95121_at   | 184.9  | 188    | 222    | 196.3  | 199.6  | 184.6  | 259.4  | 223.1  | 0.355625836 | 197.8    | 216.675  | 18.875  | 0.912887966 | 0.3512  | 1.089  |
| 95122_g_at | 116.8  | 110.5  | 140    | 158.1  | 111.9  | 86.3   | 182    | 159.4  | 0.890736271 | 131.35   | 134.9    | 3.55    | 0.973684211 | 0.9793  | 1.005  |
| 95123_at   | 179.2  | 195.7  | 138.7  | 193.6  | 224.6  | 180.7  | 170.5  | 214.5  | 0.305682291 | 176.8    | 197.575  | 20.775  | 0.894850057 | 0.3166  | 1.12   |
| 95124_i_at | 1998.9 | 1799.5 | 1637.7 | 1720.7 | 1997.8 | 1900   | 1766.5 | 2009.9 | 0.229401515 | 1789.2   | 1918.55  | 129.35  | 0.932579292 | 0.2193  | 1.074  |
| 95125_f_at | 560.3  | 528.8  | 753    | 646.6  | 799.5  | 513    | 618.6  | 663.7  | 0.744931949 | 622.175  | 648.7    | 26.525  | 0.959110529 | 0.7605  | 1.039  |
| 95128_at   | 1498.3 | 1391.1 | 1255.9 | 1420.7 | 1360   | 1202.1 | 1342.6 | 1368   | 0.297277204 | 1391.5   | 1318.175 | 73.325  | 1.05562615  | 0.307   | -1.055 |
| 95129_at   | 622.4  | 669    | 1156   | 1289.8 | 618.3  | 539.8  | 672.5  | 725    | 0.178470882 | 934.3    | 638.9    | 295.4   | 1.462357176 | 0.1394  | -1.398 |
| 95131_f_at | 6442.5 | 7149.4 | 4181.8 | 4196.1 | 5686.5 | 5152.2 | 4009.8 | 3952.9 | 0.410875595 | 5492.45  | 4700.35  | 792.1   | 1.168519366 | 0.4403  | -1.149 |
| 95132_r_at | 6001.4 | 6367.5 | 3709.3 | 3584.6 | 4526.7 | 4312.5 | 3134   | 3389.6 | 0.252501946 | 4915.7   | 3840.7   | 1075    | 1.279896894 | 0.2535  | -1.251 |
| 95133_at   | 3294.6 | 3186.2 | 2918.2 | 2572   | 2690.6 | 2583.4 | 1823.5 | 2235.8 | 0.041940904 | 2992.75  | 2333.325 | 659.425 | 1.282611724 | 0.04898 | -1.291 |
| 95134_at   | 281.8  | 281.3  | 285    | 344.8  | 198.5  | 340.1  | 315.4  | 369.8  | 0.858352274 | 298.225  | 305.95   | 7.725   | 0.974750776 | 0.9864  | 1.003  |
| 95135_at   | 787.5  | 766.8  | 1001.9 | 1096.5 | 966.9  | 879    | 912.6  | 1187.5 | 0.518026665 | 913.175  | 986.5    | 73.325  | 0.925671566 | 0.4882  | 1.085  |
| 95136_at   | 928.3  | 829.1  | 709.8  | 644.6  | 851.2  | 755    | 685.6  | 760.7  | 0.844766017 | 777.95   | 763.125  | 14.825  | 1.019426699 | 0.898   | 1.012  |
| 95137_at   | 1502.6 | 1612.3 | 1644.2 | 1269.6 | 1610   | 1556.1 | 1365.3 | 1359.4 | 0.758196461 | 1507.175 | 1472.7   | 34.475  | 1.023409384 | 0.7841  | -1.021 |
| 95138_at   | 360.6  | 303.5  | 423    | 408.1  | 312.9  | 321.6  | 433.9  | 393.3  | 0.839715897 | 373.8    | 365.425  | 8.375   | 1.02291852  | 0.8338  | 1.024  |
| 95139_at   | 456.7  | 404.1  | 415    | 463.7  | 360.3  | 372.3  | 443.7  | 305.8  | 0.106529758 | 434.875  | 370.525  | 64.35   | 1.173672492 | 0.09268 | -1.182 |
| 95140_at   | 2306.2 | 2679.6 | 2468.9 | 2659   | 2594.1 | 2483.3 | 2631.6 | 2489.6 | 0.834953175 | 2528.425 | 2549.65  | 21.225  | 0.991675328 | 0.8043  | 1.01   |
| 95141_at   | 52     | 16.1   | 26     | 60.4   | 19.5   | 70     | 43.3   | 30     | 0.895447121 | 38.625   | 40.7     | 2.075   | 0.949017199 | 0.8604  | 1.078  |
| 95142_s_at | 3214   | 3048.7 | 3172.1 | 3098.5 | 3330.2 | 2933.9 | 3328.1 | 3467.9 | 0.343310645 | 3133.325 | 3265.025 | 131.7   | 0.959663402 | 0.3415  | 1.04   |
| 95144_at   | 1333.3 | 1485   | 1206.6 | 1346.2 | 1474.1 | 1293.1 | 1311.1 | 1551.5 | 0.475166117 | 1342.775 | 1407.45  | 64.675  | 0.954048101 | 0.4761  | 1.048  |
| 95146_at   | 2202.1 | 2267   | 2064.5 | 1978.7 | 2128.4 | 2333.2 | 2191.9 | 2240.1 | 0.275522911 | 2128.075 | 2223.4   | 95.325  | 0.957126473 | 0.2649  | 1.046  |
| 95147_at   | 3127.1 | 3330.8 | 1790.3 | 1370   | 2373.2 | 2363.6 | 1665.4 | 1636.8 | 0.495461615 | 2404.55  | 2009.75  | 394.8   | 1.196442344 | 0.612   | -1.137 |
| 95148_at   | 1000.6 | 837.6  | 1096.1 | 1104.9 | 984.4  | 1065.2 | 1057.4 | 1086   | 0.592821607 | 1009.8   | 1048.25  | 38.45   | 0.963319819 | 0.5525  | 1.044  |
| 95149_at   | 1951.6 | 1814.1 | 1696.3 | 1376.8 | 1794.7 | 2008.3 | 1745.9 | 1751.2 | 0.444169943 | 1709.7   | 1825.025 | 115.325 | 0.936809085 | 0.4151  | 1.074  |
| 95150_at   | 93.3   | 113.9  | 91.4   | 92.5   | 112.6  | 29.1   | 96.9   | 94.4   | 0.498283887 | 97.775   | 83.25    | 14.525  | 1.174474474 | 0.4209  | -1.316 |
| 95151_at   | 131.2  | 153.6  | 228    | 195.8  | 46     | 99.3   | 96.9   | 166.1  | 0.062529653 | 177.15   | 102.075  | 75.075  | 1.735488611 | 0.07534 | -1.87  |
| 95152_g_at | 186.1  | 205.8  | 206.7  | 198.6  | 169.2  | 198.3  | 150.4  | 232.6  | 0.568855149 | 199.3    | 187.625  | 11.675  | 1.062225183 | 0.4833  | -1.076 |
| 95153_at   | 1326.2 | 1299.2 | 1473.8 | 1230.8 | 1508.5 | 1260.4 | 1305.5 | 1381.3 | 0.688317977 | 1332.5   | 1363.925 | 31.425  | 0.976959877 | 0.6858  | 1.023  |
| 95154_at   | 4.3    | 5      | 2.6    | 10     | 2.3    | 11.2   | 2.9    | 1.5    | 0.731212769 | 5.475    | 4.475    | 1       | 1.223463687 | 0.4714  | -1.486 |
| 95155_at   | 364.7  | 361.7  | 316.6  | 395.1  | 326.1  | 299.8  | 332    | 358.2  | 0.184622818 | 359.525  | 329.025  | 30.5    | 1.092698123 | 0.1863  | -1.091 |
| 95156_g_at | 41.1   | 58.6   | 46.4   | 87.8   | 76.7   | 13     | 56.4   | 60.7   | 0.7075187   | 58.475   | 51.7     | 6.775   | 1.131044487 | 0.5681  | -1.302 |
| 95157_at   | 151    | 39.2   | 158.3  | 295.4  | 133.9  | 60.9   | 311.8  | 241.2  | 0.745832998 | 160.975  | 186.95   | 25.975  | 0.861059107 | 0.7336  | 1.221  |
| 95158_at   | 2813.1 | 2850.2 | 2539.8 | 1982.6 | 2608.6 | 2622.7 | 2090.7 | 2377.9 | 0.628591904 | 2546.425 | 2424.975 | 121.45  | 1.050082991 | 0.6813  | -1.044 |
| 95159_at   | 739.9  | 762    | 666    | 695.9  | 695.6  | 829.2  | 601.8  | 612    | 0.611186188 | 715.95   | 684.65   | 31.3    | 1.04571679  | 0.5417  | -1.053 |
| 95161_at   | 1519.4 | 2044   | 2000   | 2133.8 | 1925.4 | 1412.2 | 1661.8 | 1934.1 | 0.343676775 | 1924.3   | 1733.375 | 190.925 | 1.110146391 | 0.3688  | -1.11  |
| 95164_at   | 80.2   | 19.2   | 25.5   | 11.9   | 8.1    | 22.8   | 11     | 32.8   | 0.405069742 | 34.2     | 18.675   | 15.525  | 1.831325301 | 0.3866  | -1.622 |
| 95165_at   | 239    | 134.9  | 242    | 187.4  | 90.1   | 291.9  | 262.3  | 206.7  | 0.825583354 | 200.825  | 212.75   | 11.925  | 0.943948296 | 0.984   | 1.006  |
| 95177_at   | 22.2   | 11.9   | 22.6   | 23.3   | 15.7   | 19.4   | 2.8    | 17.9   | 0.246769515 | 20       | 13.95    | 6.05    | 1.433691756 | 0.2995  | -1.738 |
| 95182_at   | 29.4   | 17.8   | 49.8   | 36.4   | 49.1   | 65.3   | 16.3   | 47.3   | 0.402365797 | 33.35    | 44.5     | 11.15   | 0.749438202 | 0.5456  | 1.27   |



|            |         |         |        |         |        |        |        |         |             |          |         |          |             |          |        |
|------------|---------|---------|--------|---------|--------|--------|--------|---------|-------------|----------|---------|----------|-------------|----------|--------|
| 95183_i_at | 75.5    | 42.6    | 42.4   | 48.6    | 56.7   | 92.7   | 33.6   | 92.3    | 0.364351637 | 52.275   | 68.825  | 16.55    | 0.759535053 | 0.4487   | 1.252  |
| 95184_f_at | 202.3   | 209     | 181.9  | 234.7   | 349.1  | 243.3  | 269.1  | 350.6   | 0.032578431 | 206.975  | 303.025 | 96.05    | 0.683029453 | 0.01281  | 1.451  |
| 95215_f_at | 8729.2  | 11083.4 | 8499.2 | 11515.3 | 8596.6 | 7710.3 | 9854.4 | 10239.5 | 0.415630107 | 9956.775 | 9100.2  | 856.575  | 1.094127052 | 0.4279   | -1.091 |
| 95228_f_at | 22.7    | 31.3    | 23.5   | 21.2    | 23.1   | 33.8   | 35.6   | 33.2    | 0.113401801 | 24.675   | 31.425  | 6.75     | 0.785202864 | 0.1187   | 1.27   |
| 95232_at   | 512.1   | 826.7   | 1159.3 | 977.4   | 655.1  | 627.5  | 629.9  | 648.7   | 0.193754991 | 868.875  | 640.3   | 228.575  | 1.356981103 | 0.1873   | -1.3   |
| 95244_at   | 53.6    | 48.6    | 58     | 79.9    | 56.3   | 68.4   | 84.3   | 81.4    | 0.231258406 | 60.025   | 72.6    | 12.575   | 0.826790634 | 0.2164   | 1.216  |
| 95246_at   | 7       | 7.8     | 3.1    | 4.3     | 3.4    | 4.3    | 5.3    | 3       | 0.269493971 | 5.55     | 4       | 1.55     | 1.3875      | 0.3049   | -1.322 |
| 95247_at   | 41.9    | 21      | 15.2   | 38.1    | 8      | 44.4   | 5.1    | 24.9    | 0.479503277 | 29.05    | 20.6    | 8.45     | 1.410194175 | 0.3178   | -1.828 |
| 95248_at   | 3.1     | 4.7     | 2.7    | 31.2    | 3.8    | 8.1    | 7.2    | 9.9     | 0.681426647 | 10.425   | 7.25    | 3.175    | 1.437931034 | 0.8193   | 1.155  |
| 95249_at   | 9.3     | 2.3     | 1.5    | 6.7     | 1.2    | 2.7    | 1.7    | 3.6     | 0.249549244 | 4.95     | 2.3     | 2.65     | 2.152173913 | 0.265    | -1.827 |
| 95275_at   | 13.1    | 13.8    | 7.2    | 14.7    | 7.4    | 18.1   | 13.6   | 13      | 0.776801328 | 12.2     | 13.025  | 0.825    | 0.936660269 | 0.8349   | 1.056  |
| 95281_at   | 1.6     | 3.2     | 0.6    | 2.6     | 0.4    | 3.3    | 2.1    | 1.2     | 0.777402448 | 2        | 1.75    | 0.25     | 1.142857143 | 0.7357   | -1.227 |
| 95282_at   | 8881.5  | 9681.3  | 8114.1 | 9041    | 9970.7 | 6970   | 9182.2 | 8360.1  | 0.687079866 | 8929.475 | 8620.75 | 308.725  | 1.035811849 | 0.6398   | -1.043 |
| 95283_at   | 35.8    | 38.5    | 28.1   | 34.2    | 17.1   | 41.6   | 34.9   | 46.5    | 0.904275437 | 34.15    | 35.025  | 0.875    | 0.975017844 | 0.8907   | -1.034 |
| 95284_at   | 22.2    | 26.5    | 22     | 27.3    | 12.7   | 33.9   | 27.1   | 16.8    | 0.730520066 | 24.5     | 22.625  | 1.875    | 1.082872928 | 0.5438   | -1.159 |
| 95285_at   | 416.8   | 343.4   | 311.2  | 343.3   | 361.1  | 421.3  | 359    | 379.3   | 0.36416292  | 353.675  | 380.175 | 26.5     | 0.930295259 | 0.3295   | 1.079  |
| 95286_at   | 10523.7 | 9981.4  | 7703.8 | 7486    | 7487.2 | 6644   | 7698.9 | 7134.1  | 0.11566459  | 8923.725 | 7241.05 | 1682.675 | 1.232379973 | 0.07646  | -1.22  |
| 95287_at   | 326.8   | 285.1   | 313    | 386.7   | 278.5  | 380.1  | 352.9  | 360.9   | 0.640426252 | 327.9    | 343.1   | 15.2     | 0.955698047 | 0.6509   | 1.046  |
| 95288_i_at | 238.1   | 264.5   | 447.5  | 523.2   | 324    | 273.8  | 460.8  | 465.6   | 0.886178242 | 368.325  | 381.05  | 12.725   | 0.966605432 | 0.7945   | 1.066  |
| 95289_r_at | 48.5    | 29      | 72.7   | 100.9   | 57.8   | 56.5   | 77.5   | 74.4    | 0.830728044 | 62.775   | 66.55   | 3.775    | 0.943275733 | 0.6123   | 1.162  |
| 95290_at   | 25.2    | 26.6    | 61.6   | 49.2    | 16.7   | 48.7   | 63.7   | 66.3    | 0.592235955 | 40.65    | 48.85   | 8.2      | 0.832139202 | 0.7501   | 1.14   |
| 95291_r_at | 2.4     | 10.4    | 2.4    | 4.3     | 0.3    | 13.8   | 0.8    | 2.4     | 0.888088697 | 4.875    | 4.325   | 0.55     | 1.12716763  | 0.3798   | -2.267 |
| 95292_at   | 86.9    | 60.2    | 65.9   | 51.5    | 47.1   | 66     | 90.8   | 95.7    | 0.545947733 | 66.125   | 74.9    | 8.775    | 0.882843792 | 0.6131   | 1.111  |
| 95293_at   | 51.5    | 8.7     | 10.1   | 10.4    | 7.9    | 13.4   | 20.8   | 40.9    | 0.965531911 | 20.175   | 20.75   | 0.575    | 0.972289157 | 0.7799   | 1.173  |
| 95294_at   | 39.2    | 88.2    | 58.3   | 132.4   | 65.3   | 76.4   | 107.8  | 128     | 0.574700956 | 79.525   | 94.375  | 14.85    | 0.842649007 | 0.4656   | 1.268  |
| 95295_s_at | 418.1   | 435.6   | 252.4  | 297.8   | 191.1  | 308.7  | 188.2  | 214     | 0.063916674 | 350.975  | 225.5   | 125.475  | 1.556430155 | 0.04688  | -1.55  |
| 95296_r_at | 358.8   | 351.1   | 287    | 312.1   | 248.4  | 468.5  | 269.3  | 353.9   | 0.890581175 | 327.25   | 335.025 | 7.775    | 0.976792777 | 0.9787   | 1.004  |
| 95297_at   | 3.1     | 2.9     | 2.6    | 4.5     | 12     | 13.2   | 8.8    | 8.3     | 0.00562286  | 3.275    | 10.575  | 7.3      | 0.309692671 | 0.000364 | 3.229  |
| 95298_at   | 240.8   | 259.3   | 264.5  | 306.7   | 123.1  | 248.9  | 500.9  | 427.2   | 0.554489677 | 267.825  | 325.025 | 57.2     | 0.824013537 | 0.8469   | 1.067  |
| 95299_at   | 9.8     | 8.9     | 6.9    | 3.4     | 9.4    | 8.2    | 5.3    | 7.9     | 0.797389516 | 7.25     | 7.7     | 0.45     | 0.941558442 | 0.686    | 1.121  |
| 95300_at   | 62      | 31.8    | 38.8   | 18.7    | 29.9   | 17.1   | 60.8   | 62      | 0.760280904 | 37.825   | 42.45   | 4.625    | 0.891048292 | 0.8553   | 1.079  |
| 95301_at   | 54.5    | 54.6    | 33.6   | 38.3    | 54     | 56.3   | 18.5   | 37.1    | 0.729697352 | 45.25    | 41.475  | 3.775    | 1.091018686 | 0.6145   | -1.164 |
| 95302_at   | 536.2   | 431.2   | 389.9  | 395.2   | 344    | 551.3  | 411.1  | 400.3   | 0.844169443 | 438.125  | 426.675 | 11.45    | 1.026835413 | 0.7968   | -1.034 |
| 95303_at   | 94.3    | 128.9   | 93.7   | 65.5    | 90.1   | 115.8  | 80     | 75.8    | 0.755379863 | 95.6     | 90.425  | 5.175    | 1.057229748 | 0.8147   | -1.042 |
| 95304_at   | 32.9    | 35.3    | 27.4   | 32.5    | 24.1   | 51.5   | 36.6   | 33.3    | 0.509249565 | 32.025   | 36.375  | 4.35     | 0.880412371 | 0.5837   | 1.1    |
| 95305_at   | 240.1   | 100.5   | 75.3   | 170.2   | 138.1  | 253.1  | 107.1  | 157.1   | 0.734257107 | 146.525  | 163.85  | 17.325   | 0.894263045 | 0.6302   | 1.174  |
| 95306_at   | 150     | 112.5   | 130.5  | 94.1    | 123.5  | 276.3  | 92.8   | 128.8   | 0.482374507 | 121.775  | 155.35  | 33.575   | 0.783875121 | 0.5296   | 1.184  |
| 95307_at   | 116.8   | 42.2    | 78.4   | 52.6    | 90     | 137.6  | 109.5  | 75      | 0.205910174 | 72.5     | 103.025 | 30.525   | 0.703712691 | 0.1722   | 1.496  |
| 95308_at   | 155.5   | 141.9   | 128.4  | 173.1   | 150.6  | 170.6  | 183.7  | 156.8   | 0.244227577 | 149.725  | 165.425 | 15.7     | 0.905092942 | 0.233    | 1.109  |
| 95309_at   | 57.6    | 31.6    | 35.3   | 16.4    | 37.8   | 27.8   | 55.6   | 16.3    | 0.945395353 | 35.225   | 34.375  | 0.85     | 1.024727273 | 0.9473   | -1.026 |
| 95310_at   | 1.7     | 1.8     | 0.9    | 0.4     | 1.5    | 3.1    | 1.3    | 0.8     | 0.462192014 | 1.2      | 1.675   | 0.475    | 0.71641791  | 0.4613   | 1.413  |
| 95311_at   | 22.8    | 30.7    | 21     | 30.4    | 22.4   | 24.2   | 35.7   | 35.8    | 0.485534035 | 26.225   | 29.525  | 3.3      | 0.888230313 | 0.5208   | 1.114  |
| 95312_at   | 139.3   | 102     | 126.7  | 116.1   | 54.8   | 134    | 78.5   | 86.5    | 0.146385701 | 121.025  | 88.45   | 32.575   | 1.368287168 | 0.1166   | -1.431 |
| 95313_at   | 264.2   | 214     | 372.7  | 313.3   | 124.5  | 315    | 391.7  | 302     | 0.911061314 | 291.05   | 283.3   | 7.75     | 1.02735616  | 0.7631   | -1.092 |
| 95314_at   | 20.3    | 16.2    | 17     | 17.6    | 14.3   | 26.9   | 17.6   | 12.7    | 0.977478387 | 17.775   | 17.875  | 0.1      | 0.994405594 | 0.8486   | -1.035 |
| 95315_at   | 55.2    | 44.9    | 39.9   | 42.6    | 41.9   | 48.2   | 45     | 42.7    | 0.757361267 | 45.65    | 44.45   | 1.2      | 1.026996625 | 0.7994   | -1.021 |
| 95316_at   | 133     | 132.6   | 112.5  | 134     | 118.5  | 68.5   | 107.2  | 120.9   | 0.13884125  | 128.025  | 103.775 | 24.25    | 1.233678632 | 0.1473   | -1.261 |
| 95317_at   | 37.6    | 37.1    | 28.3   | 19.7    | 17.1   | 105.3  | 29.4   | 33      | 0.498490537 | 30.675   | 46.2    | 15.525   | 0.663961039 | 0.6391   | 1.225  |
| 95318_at   | 881     | 748.2   | 811.6  | 788.2   | 757.7  | 788.4  | 782.2  | 791.9   | 0.407590373 | 807.25   | 780.05  | 27.2     | 1.03486956  | 0.3936   | -1.033 |
| 95319_at   | 31.2    | 42.5    | 22.4   | 26      | 26.6   | 40.6   | 33.9   | 25.9    | 0.833977895 | 30.525   | 31.75   | 1.225    | 0.961417323 | 0.7796   | 1.052  |
| 95320_at   | 21.1    | 19.3    | 1.9    | 3.1     | 19.8   | 41.1   | 5.8    | 4.8     | 0.539206206 | 11.35    | 17.875  | 6.525    | 0.634965035 | 0.5107   | 1.753  |
| 95321_at   | 11.5    | 13.4    | 14.6   | 16.5    | 45.5   | 9.2    | 6.9    | 15.8    | 0.592237394 | 14       | 19.35   | 5.35     | 0.723514212 | 0.9077   | 1.053  |
| 95322_g_at | 233.8   | 159.4   | 159.3  | 159.1   | 130    | 286.8  | 158.2  | 137.5   | 0.995875924 | 177.9    | 178.125 | 0.225    | 0.998736842 | 0.8588   | -1.039 |
| 95323_at   | 69.7    | 20.2    | 42     | 40.9    | 39     | 50.9   | 47.8   | 22.5    | 0.803147492 | 43.2     | 40.05   | 3.15     | 1.078651685 | 0.9264   | 1.031  |
| 95324_at   | 44.8    | 31.8    | 21.6   | 38.6    | 22.4   | 34.7   | 34.5   | 30.4    | 0.548738079 | 34.2     | 30.5    | 3.7      | 1.121311475 | 0.6332   | -1.099 |
| 95325_at   | 16.9    | 18.9    | 60.1   | 56.6    | 12.6   | 60.9   | 50     | 71.9    | 0.560648659 | 38.125   | 48.85   | 10.725   | 0.780450358 | 0.6722   | 1.263  |



|            |         |         |         |        |         |         |         |         |             |          |           |         |             |         |        |
|------------|---------|---------|---------|--------|---------|---------|---------|---------|-------------|----------|-----------|---------|-------------|---------|--------|
| 95326_at   | 138.9   | 183.9   | 332.9   | 239.1  | 131.1   | 226.3   | 227.3   | 179.6   | 0.52595468  | 223.7    | 191.075   | 32.625  | 1.170744472 | 0.5896  | -1.138 |
| 95327_at   | 14.1    | 16.3    | 6.3     | 11.9   | 5.7     | 14      | 9.3     | 11.6    | 0.499935673 | 12.15    | 10.15     | 2       | 1.197044335 | 0.567   | -1.188 |
| 95328_at   | 15.5    | 16.7    | 4.2     | 10.4   | 11.3    | 11.4    | 18.5    | 15.4    | 0.495941728 | 11.7     | 14.15     | 2.45    | 0.826855124 | 0.4227  | 1.336  |
| 95329_at   | 6.3     | 7.4     | 5.2     | 9.2    | 5.8     | 9.1     | 6.3     | 7.9     | 0.833684659 | 7.025    | 7.275     | 0.25    | 0.965635739 | 0.8243  | 1.038  |
| 95330_at   | 2       | 4.3     | 3.1     | 2      | 4.4     | 6       | 7.3     | 18.7    | 0.149625778 | 2.85     | 9.1       | 6.25    | 0.313186813 | 0.02752 | 2.883  |
| 95331_at   | 7       | 14.2    | 6.2     | 23.9   | 14.2    | 9.9     | 16.5    | 5.9     | 0.810307187 | 12.825   | 11.625    | 1.2     | 1.103225806 | 0.9668  | -1.017 |
| 95332_at   | 49.8    | 50      | 13.4    | 30.3   | 22.7    | 35.6    | 36.8    | 24.8    | 0.569054398 | 35.875   | 29.975    | 5.9     | 1.196830692 | 0.8203  | -1.083 |
| 95333_at   | 50.8    | 32.9    | 10.3    | 51.4   | 18.8    | 15.3    | 14      | 37.6    | 0.240594529 | 36.35    | 21.425    | 14.925  | 1.696616103 | 0.3559  | -1.554 |
| 95334_at   | 71.8    | 56.9    | 44.5    | 75.7   | 16.2    | 79.2    | 55.4    | 15.3    | 0.292551033 | 62.225   | 41.525    | 20.7    | 1.498494883 | 0.1976  | -1.887 |
| 95335_at   | 224.5   | 210.2   | 204.5   | 233    | 193.5   | 291.9   | 255.1   | 227.9   | 0.339222841 | 218.05   | 242.1     | 24.05   | 0.900660884 | 0.3438  | 1.099  |
| 95336_at   | 95.5    | 77.3    | 102.2   | 58.9   | 61.8    | 77.9    | 48.9    | 51.7    | 0.099970127 | 83.475   | 60.075    | 23.4    | 1.389513109 | 0.09322 | -1.382 |
| 95337_at   | 153     | 116.9   | 131.6   | 159.7  | 225.8   | 192     | 154.2   | 180.1   | 0.042162414 | 140.3    | 188.025   | 47.725  | 0.74617737  | 0.03417 | 1.338  |
| 95338_s_at | 35.1    | 37      | 35.7    | 33     | 24.4    | 48.6    | 40.3    | 41.1    | 0.554572286 | 35.2     | 38.6      | 3.4     | 0.911917098 | 0.6922  | 1.065  |
| 95339_r_at | 44.6    | 40.4    | 29.7    | 64.2   | 40.9    | 33.4    | 14.4    | 28      | 0.142242327 | 44.725   | 29.175    | 15.55   | 1.532990574 | 0.1481  | -1.581 |
| 95340_at   | 1812.3  | 1904.7  | 1589.7  | 1474   | 2618.8  | 2490.8  | 1678    | 1416.5  | 0.324427082 | 1695.175 | 2051.025  | 355.85  | 0.826501383 | 0.352   | 1.177  |
| 95341_at   | 276.7   | 219.6   | 348.4   | 265.4  | 125.2   | 166.9   | 224.2   | 210.1   | 0.034095304 | 277.525  | 181.6     | 95.925  | 1.528221366 | 0.03644 | -1.546 |
| 95342_at   | 2.4     | 6.6     | 1.5     | 1.7    | 1.7     | 10.3    | 6       | 1.3     | 0.499342954 | 3.05     | 4.825     | 1.775   | 0.632124352 | 0.6258  | 1.363  |
| 95343_at   | 41.7    | 7.2     | 4.8     | 9.3    | 40      | 12.3    | 10.2    | 11.3    | 0.819211306 | 15.75    | 18.45     | 2.7     | 0.853658537 | 0.5538  | 1.43   |
| 95344_at   | 3.9     | 4.3     | 11.7    | 9.9    | 11.5    | 14.1    | 5.5     | 8.4     | 0.406107758 | 7.45     | 9.875     | 2.425   | 0.75443038  | 0.3713  | 1.401  |
| 95345_at   | 155.4   | 182.3   | 200.1   | 263.3  | 184.8   | 283.9   | 125.1   | 194     | 0.936742999 | 200.275  | 196.95    | 3.325   | 1.016882457 | 0.8497  | 1.041  |
| 95346_at   | 48      | 29.7    | 34.1    | 60.4   | 38.3    | 77      | 50.4    | 80.5    | 0.192971902 | 43.05    | 61.55     | 18.5    | 0.699431357 | 0.1936  | 1.421  |
| 95347_at   | 16.6    | 17.1    | 19.4    | 19.8   | 18      | 20.3    | 10.8    | 20.9    | 0.783502593 | 18.225   | 17.5      | 0.725   | 1.041428571 | 0.6823  | -1.071 |
| 95348_at   | 27.6    | 16.9    | 16.4    | 17.3   | 63.8    | 46.7    | 13      | 54.7    | 0.106553535 | 19.55    | 44.55     | 25      | 0.438832772 | 0.1221  | 1.998  |
| 95349_g_at | 29.1    | 22.5    | 28.7    | 27.4   | 36.8    | 23.8    | 32      | 35.5    | 0.188485128 | 26.925   | 32.025    | 5.1     | 0.840749415 | 0.2059  | 1.179  |
| 95350_at   | 74.5    | 39.7    | 20.2    | 23.9   | 46.7    | 110.2   | 52.1    | 56      | 0.217167967 | 39.575   | 66.25     | 26.675  | 0.597358491 | 0.1454  | 1.802  |
| 95351_at   | 82.7    | 56.4    | 94.5    | 110.2  | 42.4    | 55.1    | 96.8    | 72.2    | 0.281882807 | 85.95    | 66.625    | 19.325  | 1.290056285 | 0.277   | -1.313 |
| 95352_at   | 1.7     | 1.7     | 1.7     | 3.6    | 2.1     | 1.6     | 2.1     | 1.7     | 0.580428319 | 2.175    | 1.875     | 0.3     | 1.16        | 0.6753  | -1.093 |
| 95353_at   | 6.1     | 9.5     | 2.1     | 7.3    | 2.2     | 5.5     | 1.7     | 4.3     | 0.177965659 | 6.25     | 3.425     | 2.825   | 1.824817518 | 0.2345  | -1.78  |
| 95354_at   | 3.2     | 8.7     | 11.2    | 24.6   | 11.6    | 24      | 4.4     | 9.5     | 0.944155111 | 11.925   | 12.375    | 0.45    | 0.963636364 | 0.8531  | 1.111  |
| 95355_at   | 238.3   | 282.7   | 185.1   | 326.5  | 274.5   | 189.8   | 330.1   | 264.7   | 0.879340402 | 258.15   | 264.775   | 6.625   | 0.974978756 | 0.8729  | 1.028  |
| 95356_at   | 4002.6  | 3764.9  | 3323.4  | 2277.5 | 4123.6  | 3772.3  | 3159.8  | 2788.9  | 0.814864912 | 3342.1   | 3461.15   | 119.05  | 0.965603918 | 0.7754  | 1.047  |
| 95357_at   | 204.4   | 109     | 230.8   | 156.5  | 97.9    | 151.4   | 179.9   | 164     | 0.441053684 | 175.175  | 148.3     | 26.875  | 1.181220499 | 0.5025  | -1.165 |
| 95358_at   | 185.2   | 143.3   | 161.4   | 216.3  | 121.3   | 163.4   | 171.4   | 151     | 0.250575101 | 176.55   | 151.775   | 24.775  | 1.163235052 | 0.2546  | -1.159 |
| 95359_at   | 16562.4 | 17103.1 | 12171.5 | 13079  | 14216.1 | 13452.1 | 13591.9 | 13719.2 | 0.48502651  | 14729    | 13744.825 | 984.175 | 1.071603313 | 0.5182  | -1.06  |
| 95360_at   | 81.7    | 48.3    | 89.2    | 78.6   | 52.3    | 83.6    | 81.6    | 71.1    | 0.848394428 | 74.45    | 72.15     | 2.3     | 1.031878032 | 0.9062  | -1.022 |
| 95363_at   | 24.7    | 32.8    | 29.2    | 27.1   | 26.7    | 54.3    | 11.1    | 23.1    | 0.972169856 | 28.45    | 28.8      | 0.35    | 0.987847222 | 0.6964  | -1.145 |
| 95364_at   | 234.7   | 205.5   | 259.5   | 168.5  | 169.6   | 179.5   | 153     | 186.5   | 0.101487066 | 217.05   | 172.15    | 44.9    | 1.260819053 | 0.07429 | -1.248 |
| 95366_at   | 43.3    | 56.7    | 33.8    | 64.3   | 41.7    | 89.5    | 56.8    | 64.6    | 0.308079192 | 49.525   | 63.15     | 13.625  | 0.784243864 | 0.3116  | 1.266  |
| 95368_at   | 71.6    | 54.4    | 54.7    | 33.6   | 55.7    | 17.9    | 96.5    | 51.1    | 0.927481119 | 53.575   | 55.3      | 1.725   | 0.96880651  | 0.8138  | -1.1   |
| 95369_at   | 39.1    | 26.1    | 17.1    | 18.2   | 14.1    | 46.5    | 23.4    | 19.5    | 0.93479718  | 25.125   | 25.875    | 0.75    | 0.971014493 | 0.9633  | 1.015  |
| 95370_at   | 3.6     | 4       | 2.9     | 5.1    | 3.2     | 4.8     | 4.1     | 2       | 0.640369636 | 3.9      | 3.525     | 0.375   | 1.106382979 | 0.5544  | -1.151 |
| 95371_g_at | 13.8    | 9.2     | 7.7     | 10.8   | 13      | 15.3    | 10.7    | 15      | 0.114876113 | 10.375   | 13.5      | 3.125   | 0.768518519 | 0.1096  | 1.32   |
| 95372_at   | 45.8    | 22.5    | 8.8     | 19.6   | 4.3     | 29.6    | 9       | 39.2    | 0.759396086 | 24.175   | 20.525    | 3.65    | 1.177831912 | 0.5983  | -1.409 |
| 95373_at   | 14.7    | 9.3     | 11.7    | 15.6   | 15.5    | 21.6    | 18.5    | 16.8    | 0.035801398 | 12.825   | 18.1      | 5.275   | 0.708563536 | 0.04058 | 1.432  |
| 95374_f_at | 1012.8  | 571.3   | 750.7   | 872.9  | 639.2   | 874.9   | 747.8   | 633.8   | 0.508612093 | 801.925  | 723.925   | 78      | 1.107745968 | 0.5572  | -1.094 |
| 95375_r_at | 37      | 31.6    | 58.5    | 68.2   | 39.8    | 68.2    | 41.5    | 38.3    | 0.873064795 | 48.825   | 46.95     | 1.875   | 1.039936102 | 0.9334  | 1.02   |
| 95376_at   | 44.2    | 46.5    | 68.6    | 28.4   | 24      | 53.3    | 34.7    | 49      | 0.555006576 | 46.925   | 40.25     | 6.675   | 1.165838509 | 0.5751  | -1.164 |
| 95377_at   | 443.4   | 316.2   | 376.8   | 525.3  | 344.6   | 338.7   | 298.6   | 344.6   | 0.157618408 | 415.425  | 331.625   | 83.8    | 1.252695062 | 0.1164  | -1.233 |
| 95378_at   | 224.2   | 214.8   | 220.4   | 221    | 193.1   | 235.2   | 204.9   | 210.5   | 0.380686298 | 220.1    | 210.925   | 9.175   | 1.043498874 | 0.3272  | -1.046 |
| 95379_at   | 54.5    | 52.8    | 40.4    | 28     | 33.9    | 55.4    | 41.8    | 52.3    | 0.815949644 | 43.925   | 45.85     | 1.925   | 0.958015267 | 0.7693  | 1.06   |
| 95380_at   | 62.6    | 31      | 35.1    | 25.1   | 31.8    | 48.8    | 37      | 42.8    | 0.864401608 | 38.45    | 40.1      | 1.65    | 0.958852868 | 0.6915  | 1.094  |
| 95381_at   | 267.9   | 167.3   | 174.3   | 156.7  | 184.1   | 228.8   | 146.3   | 107.4   | 0.52100244  | 191.55   | 166.65    | 24.9    | 1.149414941 | 0.4763  | -1.166 |
| 95382_at   | 30.7    | 28.1    | 32.3    | 44     | 44.9    | 26.9    | 33.1    | 51.4    | 0.456046641 | 33.775   | 39.075    | 5.3     | 0.864363404 | 0.4903  | 1.138  |
| 95383_at   | 291.9   | 268.7   | 210.2   | 297.9  | 225.4   | 317.2   | 288.8   | 305.3   | 0.573985641 | 267.175  | 284.175   | 17      | 0.940177707 | 0.5947  | 1.064  |
| 95385_at   | 382     | 244.1   | 313.5   | 380.2  | 375.2   | 487.9   | 381.9   | 384.5   | 0.119433119 | 329.95   | 407.375   | 77.425  | 0.8099417   | 0.122   | 1.247  |
| 95386_at   | 517     | 554.3   | 680.7   | 540.6  | 690.5   | 381     | 808.8   | 624.5   | 0.615012509 | 573.15   | 626.2     | 53.05   | 0.915282657 | 0.7505  | 1.059  |



|            |        |        |        |        |        |        |        |        |             |          |          |         |             |          |        |
|------------|--------|--------|--------|--------|--------|--------|--------|--------|-------------|----------|----------|---------|-------------|----------|--------|
| 95387_f_at | 131.5  | 233.7  | 332.4  | 606.6  | 216.2  | 209.9  | 577.5  | 544.8  | 0.685208716 | 326.05   | 387.1    | 61.05   | 0.842288814 | 0.6411   | 1.232  |
| 95388_at   | 4.7    | 7.8    | 3.3    | 3.2    | 4      | 4.9    | 3.2    | 4.5    | 0.626825776 | 4.75     | 4.15     | 0.6     | 1.144578313 | 0.719    | -1.089 |
| 95389_at   | 47     | 35     | 13.9   | 40.4   | 13.6   | 20.9   | 21.9   | 17     | 0.1126279   | 34.075   | 18.35    | 15.725  | 1.856948229 | 0.1159   | -1.718 |
| 95390_at   | 14.2   | 4.8    | 7      | 9.2    | 4      | 9.1    | 5      | 7.6    | 0.355961449 | 8.8      | 6.425    | 2.375   | 1.369649805 | 0.3655   | -1.335 |
| 95391_at   | 104.3  | 71.9   | 146.5  | 91.4   | 99.6   | 109.2  | 85.9   | 127.6  | 0.914345444 | 103.525  | 105.575  | 2.05    | 0.980582524 | 0.808    | 1.044  |
| 95392_at   | 7.7    | 5.9    | 49.2   | 15.2   | 21.2   | 33.3   | 20.9   | 39.5   | 0.450763948 | 19.5     | 28.725   | 9.225   | 0.678851175 | 0.2059   | 2.028  |
| 95393_at   | 286.8  | 211    | 315.8  | 327.9  | 135    | 206.1  | 401.5  | 310.4  | 0.74674646  | 285.375  | 263.25   | 22.125  | 1.084045584 | 0.5892   | -1.159 |
| 95395_at   | 339.9  | 342.8  | 447.5  | 601.4  | 454.4  | 418.1  | 578.2  | 575.5  | 0.363574059 | 432.9    | 506.55   | 73.65   | 0.854604679 | 0.3108   | 1.192  |
| 95396_at   | 6.6    | 5.7    | 3.5    | 0.2    | 3.3    | 9.2    | 8      | 4.8    | 0.284121893 | 4        | 6.325    | 2.325   | 0.632411067 | 0.3082   | 2.637  |
| 95397_at   | 887.4  | 809.2  | 879.2  | 656.4  | 781.6  | 782.4  | 740.1  | 654.7  | 0.318741108 | 808.05   | 739.7    | 68.35   | 1.092402325 | 0.3434   | -1.088 |
| 95398_at   | 144.2  | 113.8  | 70.7   | 103    | 101.4  | 125.2  | 85.3   | 83.2   | 0.632499988 | 107.925  | 98.775   | 9.15    | 1.092634776 | 0.7023   | -1.073 |
| 95399_at   | 35.9   | 20.1   | 7.4    | 13.4   | 8.9    | 12.4   | 23.4   | 10.4   | 0.474315617 | 19.2     | 13.775   | 5.425   | 1.393829401 | 0.5603   | -1.276 |
| 95400_i_at | 797.9  | 678.2  | 709    | 814.3  | 957.5  | 929.6  | 749.5  | 791.9  | 0.136347942 | 749.85   | 857.125  | 107.275 | 0.874843226 | 0.1291   | 1.14   |
| 95401_at   | 933.8  | 749.2  | 1044.7 | 949.8  | 724.2  | 934.3  | 740.8  | 922.1  | 0.329352761 | 919.375  | 830.35   | 89.025  | 1.107213825 | 0.3403   | -1.107 |
| 95404_at   | 1101.5 | 1116.2 | 1799.3 | 1371.3 | 1095.2 | 1387.2 | 1779   | 1343.7 | 0.810190693 | 1347.075 | 1401.275 | 54.2    | 0.96132094  | 0.7772   | 1.046  |
| 95405_at   | 3011.8 | 2697.8 | 2730.4 | 2447.2 | 2981   | 2811.9 | 3263.5 | 2957.1 | 0.109995686 | 2721.8   | 3003.375 | 281.575 | 0.906247139 | 0.1066   | 1.105  |
| 95406_at   | 5612.6 | 5192.2 | 3898.1 | 3843.4 | 4535.1 | 4386.2 | 3348.3 | 3585.4 | 0.264268281 | 4636.575 | 3963.75  | 672.825 | 1.16974456  | 0.2645   | -1.163 |
| 95407_at   | 19.4   | 2.3    | 9.4    | 13.7   | 3      | 11.8   | 14.9   | 13.8   | 0.945015197 | 11.2     | 10.875   | 0.325   | 1.029885057 | 0.9229   | 1.063  |
| 95408_at   | 2044.8 | 2311.8 | 1783.8 | 1983.8 | 2335.7 | 1895.5 | 1918.9 | 2364.1 | 0.583507318 | 2031.05  | 2128.55  | 97.5    | 0.95419417  | 0.591    | 1.047  |
| 95409_at   | 1607.7 | 1742   | 1356.6 | 1325.6 | 1576.8 | 1654.9 | 1476.7 | 1396.9 | 0.879994979 | 1507.975 | 1526.325 | 18.35   | 0.987977659 | 0.8338   | 1.017  |
| 95410_s_at | 74     | 54.2   | 49.8   | 50.9   | 43.9   | 89.3   | 59     | 27.4   | 0.878810089 | 57.225   | 54.9     | 2.325   | 1.042349727 | 0.6715   | -1.125 |
| 95411_at   | 2806   | 3030.5 | 2713.6 | 2632.5 | 2958.6 | 2995.7 | 2787   | 2763.1 | 0.473206367 | 2795.65  | 2876.1   | 80.45   | 0.972028094 | 0.4562   | 1.03   |
| 95412_at   | 954    | 1200.6 | 1391.2 | 1304.6 | 1570.9 | 1388.3 | 1427.8 | 1333.7 | 0.103490654 | 1212.6   | 1430.175 | 217.575 | 0.847868268 | 0.1013   | 1.189  |
| 95413_at   | 3217.1 | 2986.1 | 2941.1 | 2573.9 | 2303.1 | 3036.2 | 2577.7 | 2577.1 | 0.181437751 | 2929.55  | 2623.525 | 306.025 | 1.116646497 | 0.1777   | -1.119 |
| 95414_i_at | 428.9  | 374.9  | 338    | 333.4  | 530.5  | 460.2  | 376.6  | 402.3  | 0.128750194 | 368.8    | 442.4    | 73.6    | 0.83363472  | 0.1116   | 1.195  |
| 95415_f_at | 705.5  | 701.4  | 628.2  | 814.9  | 625    | 858.9  | 674    | 751.8  | 0.823636474 | 712.5    | 727.425  | 14.925  | 0.979482421 | 0.8451   | 1.018  |
| 95416_at   | 494.9  | 457.8  | 568.3  | 436.8  | 843.5  | 542.5  | 627.9  | 519.9  | 0.145159532 | 489.45   | 633.45   | 144     | 0.772673455 | 0.09564  | 1.277  |
| 95417_at   | 292.8  | 330.3  | 401.6  | 428.3  | 352.4  | 287.9  | 441.2  | 441.6  | 0.731977918 | 363.25   | 380.775  | 17.525  | 0.953975445 | 0.7603   | 1.044  |
| 95418_at   | 530    | 778.8  | 780.5  | 825.8  | 599.8  | 658.2  | 592.1  | 858    | 0.592162552 | 728.775  | 677.025  | 51.75   | 1.076437355 | 0.6159   | -1.073 |
| 95419_at   | 4858   | 4765.6 | 4442.7 | 4853.4 | 4518.4 | 4981   | 4810.8 | 4795.7 | 0.745700148 | 4729.925 | 4776.475 | 46.55   | 0.990254319 | 0.7481   | 1.01   |
| 95420_at   | 1820.4 | 1119.4 | 1351.3 | 984.5  | 1221.5 | 1755.9 | 1092.1 | 1025.3 | 0.861074298 | 1318.9   | 1273.7   | 45.2    | 1.035487163 | 0.8716   | -1.031 |
| 95423_at   | 1115.7 | 708.4  | 721.8  | 1079.1 | 695.4  | 809.7  | 995.5  | 1158.8 | 0.956325624 | 906.25   | 914.85   | 8.6     | 0.990599552 | 0.9387   | 1.014  |
| 95424_at   | 8508   | 8731.6 | 7981.8 | 7614.7 | 8432.2 | 8930.7 | 8406.3 | 8797   | 0.195700455 | 8209.025 | 8641.55  | 432.525 | 0.949948215 | 0.1791   | 1.054  |
| 95425_at   | 323.6  | 396.7  | 382.6  | 527.5  | 436.8  | 311.4  | 354.1  | 382.3  | 0.50207286  | 407.6    | 371.15   | 36.45   | 1.098208272 | 0.5159   | -1.089 |
| 95426_at   | 2217.1 | 2099.1 | 1889.3 | 1389.8 | 2475.8 | 2510.5 | 1909.6 | 1980.6 | 0.235105834 | 1898.825 | 2219.125 | 320.3   | 0.855663831 | 0.2446   | 1.178  |
| 95427_at   | 1311.6 | 1233.7 | 1530.8 | 1358   | 1472.4 | 1029.9 | 1451.6 | 1336.2 | 0.776018649 | 1358.525 | 1322.525 | 36      | 1.027220657 | 0.7347   | -1.034 |
| 95428_at   | 380.1  | 434.6  | 366.7  | 528.9  | 398.4  | 521    | 319.7  | 372.4  | 0.676770973 | 427.575  | 402.875  | 24.7    | 1.061309339 | 0.6394   | -1.067 |
| 95430_f_at | 1536.5 | 1976.8 | 2138.8 | 2282.5 | 2124.2 | 1827.2 | 1953   | 2020.7 | 0.989735528 | 1983.65  | 1981.275 | 2.375   | 1.001198723 | 0.9328   | 1.008  |
| 95431_at   | 285.5  | 348.8  | 432    | 407.2  | 268.6  | 309.1  | 394.1  | 350.9  | 0.409152652 | 368.375  | 330.675  | 37.7    | 1.114009224 | 0.4267   | -1.111 |
| 95432_f_at | 1101.4 | 1118.4 | 1149.4 | 1170   | 1148.8 | 1071.5 | 1168.3 | 1124.3 | 0.809383965 | 1134.8   | 1128.225 | 6.575   | 1.005827738 | 0.8017   | 1.006  |
| 95433_at   | 382.6  | 321.7  | 370.6  | 446.5  | 300.4  | 313    | 311.7  | 359.9  | 0.102563447 | 380.35   | 321.25   | 59.1    | 1.183968872 | 0.0798   | -1.179 |
| 95434_at   | 2023.4 | 2811   | 1921   | 1746   | 2308.3 | 2086.2 | 1836.6 | 1630.3 | 0.589641939 | 2125.35  | 1965.35  | 160     | 1.081410436 | 0.6045   | -1.073 |
| 95435_at   | 237    | 228.1  | 162.5  | 235.3  | 244.4  | 277.5  | 236.4  | 301.4  | 0.081045032 | 215.725  | 264.925  | 49.2    | 0.814287062 | 0.09456  | 1.237  |
| 95436_at   | 25.6   | 33.7   | 25.2   | 36.3   | 20.1   | 19.4   | 21.4   | 18     | 0.030273488 | 30.2     | 19.725   | 10.475  | 1.531051965 | 0.006157 | -1.513 |
| 95437_at   | 367.7  | 452.6  | 475.4  | 545.8  | 482.6  | 426.4  | 497    | 502.6  | 0.699588358 | 460.375  | 477.15   | 16.775  | 0.964843341 | 0.6458   | 1.045  |
| 95438_at   | 356.7  | 367.4  | 451.3  | 453    | 487.5  | 442.6  | 547.5  | 505.6  | 0.041265    | 407.1    | 495.8    | 88.7    | 0.821097217 | 0.04259  | 1.222  |
| 95439_at   | 5.3    | 5.9    | 6.9    | 3.6    | 3.4    | 13.4   | 1.4    | 5.6    | 0.857710261 | 5.425    | 5.95     | 0.525   | 0.911764706 | 0.7228   | -1.2   |
| 95440_at   | 275.7  | 231.3  | 239.3  | 257.8  | 227    | 276.8  | 249.3  | 224.3  | 0.686328846 | 251.025  | 244.35   | 6.675   | 1.027317373 | 0.6668   | -1.029 |
| 95441_at   | 3856.8 | 3657.5 | 3507.9 | 3103.9 | 3374.6 | 3845.7 | 3019.4 | 3090.1 | 0.450277847 | 3531.525 | 3332.45  | 199.075 | 1.059738331 | 0.4386   | -1.061 |
| 95442_at   | 1535.4 | 1712.7 | 1311.3 | 1185.3 | 1653.6 | 1411.2 | 1441.1 | 1240.3 | 0.998023708 | 1436.175 | 1436.55  | 0.375   | 0.999738958 | 0.9616   | 1.005  |
| 95444_at   | 1350.9 | 1342.8 | 1610.4 | 1440.3 | 1585.9 | 1446.5 | 1632.2 | 1467.9 | 0.257461301 | 1436.1   | 1533.125 | 97.025  | 0.936714227 | 0.2415   | 1.069  |
| 95445_at   | 859.1  | 704.5  | 1071.3 | 917.4  | 785.4  | 674.1  | 841.7  | 978.4  | 0.516547279 | 888.075  | 819.9    | 68.175  | 1.083150384 | 0.5291   | -1.081 |
| 95446_at   | 4488.7 | 4187.8 | 4126.6 | 3496   | 4156.9 | 3914   | 4246.5 | 4103.3 | 0.897353424 | 4074.775 | 4105.175 | 30.4    | 0.992594713 | 0.8488   | 1.011  |
| 95447_at   | 1173.2 | 1281.3 | 1037   | 875.3  | 1008   | 1171.3 | 957.2  | 1022.4 | 0.624544185 | 1091.7   | 1039.725 | 51.975  | 1.04998918  | 0.671    | -1.042 |
| 95448_at   | 3165.2 | 3570.1 | 3341.5 | 2724.6 | 3715.4 | 3360.4 | 2881.4 | 3032.9 | 0.860704697 | 3200.35  | 3247.525 | 47.175  | 0.985473553 | 0.8614   | 1.015  |
| 95449_at   | 1039.2 | 938    | 873.6  | 992.6  | 793.6  | 967.2  | 886.2  | 831.6  | 0.129434419 | 960.85   | 869.65   | 91.2    | 1.104869775 | 0.128    | -1.106 |



|            |        |        |        |        |        |        |        |        |             |          |          |         |             |         |        |
|------------|--------|--------|--------|--------|--------|--------|--------|--------|-------------|----------|----------|---------|-------------|---------|--------|
| 95450_at   | 28.8   | 4.6    | 17     | 16.3   | 4.2    | 19.2   | 7.1    | 3.4    | 0.234762913 | 16.675   | 8.475    | 8.2     | 1.967551622 | 0.2309  | -2.08  |
| 95451_at   | 1305.9 | 975.1  | 1174.6 | 1109.8 | 1217.4 | 1217.7 | 1364.8 | 1207.5 | 0.222250377 | 1141.35  | 1251.85  | 110.5   | 0.911730639 | 0.2025  | 1.101  |
| 95452_i_at | 8.9    | 29.5   | 15.8   | 24     | 6.6    | 58     | 21.5   | 3.3    | 0.844360247 | 19.55    | 22.35    | 2.8     | 0.874720358 | 0.65    | -1.39  |
| 95453_f_at | 358.4  | 508.7  | 309.8  | 344.4  | 458.6  | 350.8  | 388.7  | 355.3  | 0.880398074 | 380.325  | 388.35   | 8.025   | 0.979335651 | 0.7972  | 1.034  |
| 95454_at   | 20.2   | 19.3   | 8.2    | 8.7    | 30     | 20.3   | 5.3    | 13.8   | 0.619942921 | 14.1     | 17.35    | 3.25    | 0.812680115 | 0.8078  | 1.12   |
| 95455_at   | 8.3    | 2.9    | 3.2    | 13.4   | 3.8    | 23.2   | 5.2    | 22.2   | 0.313267592 | 6.95     | 13.6     | 6.65    | 0.511029412 | 0.3817  | 1.773  |
| 95456_r_at | 4845.6 | 5508.9 | 4323.2 | 4161.2 | 5259.3 | 4582.1 | 4825.1 | 4465   | 0.843414293 | 4709.725 | 4782.875 | 73.15   | 0.984705852 | 0.7977  | 1.02   |
| 95457_at   | 1394.7 | 1475   | 1693.6 | 1508   | 1436.3 | 1365.8 | 1531   | 1458.6 | 0.378694442 | 1517.825 | 1447.925 | 69.9    | 1.048275981 | 0.3722  | -1.046 |
| 95458_s_at | 2208.7 | 1706.3 | 1721.5 | 2319   | 1251.7 | 1551.2 | 2392.7 | 2382.7 | 0.788823785 | 1988.875 | 1894.575 | 94.3    | 1.049773696 | 0.6859  | -1.08  |
| 95460_at   | 1741.8 | 2005   | 1818.2 | 1793.1 | 1845.2 | 1857   | 2054.5 | 1888.3 | 0.378087068 | 1839.525 | 1911.25  | 71.725  | 0.962472204 | 0.3632  | 1.039  |
| 95462_at   | 2218.9 | 2221.8 | 2178.3 | 1768.7 | 2543.6 | 2418.9 | 2505.1 | 2188.5 | 0.062162335 | 2096.925 | 2414.025 | 317.1   | 0.86864262  | 0.06903 | 1.154  |
| 95464_at   | 20.6   | 33.1   | 6.9    | 15.9   | 12.5   | 14     | 5.2    | 25     | 0.497256684 | 19.125   | 14.175   | 4.95    | 1.349206349 | 0.544   | -1.344 |
| 95465_s_at | 303.4  | 313.4  | 277.9  | 214.2  | 264.8  | 303.7  | 173.1  | 172.7  | 0.274795071 | 277.225  | 228.575  | 48.65   | 1.212840424 | 0.2526  | -1.239 |
| 95466_at   | 162.6  | 135.1  | 142.4  | 135.5  | 58.2   | 117.7  | 138.5  | 125    | 0.149880819 | 143.9    | 109.85   | 34.05   | 1.309968138 | 0.1663  | -1.375 |
| 95467_at   | 514.2  | 617.5  | 631.7  | 605    | 667.2  | 595.8  | 664.4  | 667    | 0.133812311 | 592.1    | 648.6    | 56.5    | 0.9128893   | 0.1384  | 1.098  |
| 95468_at   | 579.6  | 581.1  | 859.4  | 849.9  | 555.5  | 550.6  | 775.1  | 776.1  | 0.621555139 | 717.5    | 664.325  | 53.175  | 1.080043653 | 0.642   | -1.075 |
| 95469_at   | 527.1  | 532.2  | 447.3  | 422.8  | 409.5  | 439.4  | 499.1  | 343.1  | 0.213607749 | 482.35   | 422.775  | 59.575  | 1.140914198 | 0.2126  | -1.145 |
| 95470_at   | 1021.3 | 973.7  | 855    | 1036.9 | 1260.7 | 901    | 826.9  | 892.6  | 0.989960357 | 971.725  | 970.3    | 1.425   | 1.001468618 | 0.9073  | 1.013  |
| 95471_at   | 1161.4 | 1672.7 | 1608   | 1710   | 1753.9 | 1776.3 | 2671.9 | 2195.3 | 0.077012763 | 1538.025 | 2099.35  | 561.325 | 0.73261962  | 0.06277 | 1.36   |
| 95472_f_at | 2573.5 | 2971.2 | 2909.7 | 3133.7 | 3456.5 | 2684.7 | 3204   | 3756.5 | 0.205202406 | 2897.025 | 3275.425 | 378.4   | 0.884473007 | 0.2048  | 1.125  |
| 95473_s_at | 3862.8 | 4391.9 | 2955.1 | 2894.9 | 3886.1 | 3803.1 | 2622.3 | 2744.1 | 0.615752724 | 3526.175 | 3263.9   | 262.275 | 1.080356322 | 0.6139  | -1.081 |
| 95474_at   | 1861.7 | 1688.4 | 1900.5 | 1687.3 | 1894   | 1332.6 | 1518.5 | 1689.2 | 0.250610771 | 1784.475 | 1608.575 | 175.9   | 1.109351445 | 0.2226  | -1.117 |
| 95477_at   | 1092.8 | 1441.6 | 1778.6 | 2089   | 1872.8 | 1748.9 | 2027.6 | 2177.5 | 0.201165847 | 1600.5   | 1956.7   | 356.2   | 0.817958808 | 0.1772  | 1.254  |
| 95478_at   | 607.4  | 610    | 463.5  | 553.5  | 627.8  | 599.5  | 556    | 622    | 0.319206832 | 558.6    | 601.325  | 42.725  | 0.928948572 | 0.3037  | 1.082  |
| 95479_at   | 280.4  | 448.9  | 768.6  | 1045.2 | 669    | 530    | 658.9  | 496.4  | 0.803529587 | 635.775  | 588.575  | 47.2    | 1.080193688 | 0.9132  | 1.035  |
| 95480_at   | 757.8  | 574    | 632.5  | 539.1  | 537.2  | 630.6  | 668    | 649.5  | 0.938910266 | 625.85   | 621.325  | 4.525   | 1.007282823 | 0.9805  | 1.002  |
| 95481_at   | 136.8  | 119.3  | 144.4  | 187.6  | 108.9  | 146.5  | 150.7  | 196    | 0.884195434 | 147.025  | 150.525  | 3.5     | 0.976748048 | 0.9207  | 1.016  |
| 95482_at   | 869.4  | 682.8  | 974.5  | 1184.9 | 948.6  | 901.4  | 1102.4 | 1109.8 | 0.493160725 | 927.9    | 1015.55  | 87.65   | 0.913692088 | 0.436   | 1.111  |
| 95483_at   | 2429.9 | 2541.3 | 2192.1 | 1953.7 | 2226.3 | 1992.1 | 2153.7 | 2155.5 | 0.353454546 | 2279.25  | 2131.9   | 147.35  | 1.06911675  | 0.3594  | -1.065 |
| 95485_at   | 2538.3 | 3002.7 | 2554.9 | 2462.1 | 2424   | 2043.9 | 2379.2 | 2126.9 | 0.045145286 | 2639.5   | 2243.5   | 396     | 1.176509918 | 0.03805 | -1.176 |
| 95486_at   | 1675.4 | 1366   | 693.9  | 1197.2 | 1252.8 | 1454.5 | 888.7  | 996.8  | 0.739471961 | 1233.125 | 1148.2   | 84.925  | 1.073963595 | 0.8579  | -1.042 |
| 95488_at   | 1028.6 | 1143.8 | 1639   | 1916.8 | 1232.9 | 904.3  | 1636.6 | 1893.8 | 0.961648818 | 1432.05  | 1416.9   | 15.15   | 1.010692357 | 0.9414  | -1.017 |
| 95489_at   | 536.7  | 440.4  | 529.9  | 532.6  | 514.8  | 516    | 542.1  | 577.9  | 0.358105022 | 509.9    | 537.7    | 27.8    | 0.948298308 | 0.3539  | 1.057  |
| 95490_at   | 2421.6 | 2331   | 2606.8 | 2267.7 | 2194.4 | 2208.9 | 2600.3 | 2382.5 | 0.634817441 | 2406.775 | 2346.525 | 60.25   | 1.025676266 | 0.6162  | -1.027 |
| 95491_at   | 3749.1 | 5137.7 | 3450.7 | 3572.5 | 4474.2 | 3378.9 | 3347.5 | 3511   | 0.553889082 | 3977.5   | 3677.9   | 299.6   | 1.081459529 | 0.5487  | -1.075 |
| 95493_at   | 5339.7 | 5377.5 | 6049.5 | 7143.6 | 4902.7 | 4763.2 | 7768.2 | 6875.6 | 0.911614787 | 5977.575 | 6077.425 | 99.85   | 0.983570344 | 0.993   | 1.001  |
| 95496_at   | 1382.9 | 1266.3 | 1320.3 | 1454.9 | 1310.5 | 1007   | 994    | 1554.5 | 0.382790061 | 1356.1   | 1216.5   | 139.6   | 1.114755446 | 0.3082  | -1.133 |
| 95497_at   | 506.1  | 659.8  | 651.6  | 578.2  | 593    | 453.2  | 624.1  | 584.4  | 0.524547734 | 598.925  | 563.675  | 35.25   | 1.062536036 | 0.5345  | -1.064 |
| 95498_at   | 342.6  | 464.1  | 358.8  | 361.9  | 424.6  | 374.5  | 416.2  | 352.6  | 0.768570747 | 381.85   | 391.975  | 10.125  | 0.974169271 | 0.7194  | 1.031  |
| 95501_at   | 358.7  | 364.7  | 361.3  | 343.9  | 386.9  | 420.1  | 377    | 461.2  | 0.06156727  | 357.15   | 411.3    | 54.15   | 0.868344274 | 0.02667 | 1.148  |
| 95502_at   | 908.4  | 709.9  | 723.7  | 677.8  | 593.6  | 667.9  | 782.5  | 725.3  | 0.380612644 | 754.95   | 692.325  | 62.625  | 1.090456072 | 0.3712  | -1.089 |
| 95503_at   | 86.3   | 62.8   | 94.7   | 62     | 92.3   | 78.1   | 41.4   | 79.4   | 0.799930698 | 76.45    | 72.8     | 3.65    | 1.050137363 | 0.7364  | -1.076 |
| 95505_at   | 307.4  | 262.4  | 312    | 253.9  | 337.2  | 303.5  | 317.5  | 299.1  | 0.141826304 | 283.925  | 314.325  | 30.4    | 0.903284817 | 0.1291  | 1.11   |
| 95506_at   | 75.2   | 162.2  | 147.9  | 167.3  | 84.6   | 120.7  | 203.4  | 200.4  | 0.713437699 | 138.15   | 152.275  | 14.125  | 0.90724019  | 0.7867  | 1.084  |
| 95507_at   | 1092.7 | 1028.6 | 1329.8 | 1103.3 | 1317.3 | 1238.9 | 1207.6 | 1056.4 | 0.467860291 | 1138.6   | 1205.05  | 66.45   | 0.94485706  | 0.452   | 1.06   |
| 95508_at   | 2478.4 | 2742.7 | 2787.8 | 2835.5 | 3112.4 | 2476.1 | 2486.8 | 2743.9 | 0.97188265  | 2711.1   | 2704.8   | 6.3     | 1.002329193 | 0.9329  | -1.005 |
| 95509_at   | 10.6   | 8.4    | 9.8    | 4.9    | 6.7    | 32.3   | 9.5    | 5.9    | 0.474260905 | 8.425    | 13.6     | 5.175   | 0.619485294 | 0.5573  | 1.302  |
| 95511_at   | 205.9  | 222.5  | 348.1  | 480.4  | 360    | 202.9  | 374.9  | 344.1  | 0.936955751 | 314.225  | 320.475  | 6.25    | 0.980497699 | 0.84    | 1.053  |
| 95512_at   | 429.5  | 337.2  | 359.2  | 377    | 468.4  | 490    | 579.1  | 418.6  | 0.034523231 | 375.725  | 489.025  | 113.3   | 0.768314503 | 0.0217  | 1.298  |
| 95513_at   | 458.9  | 530.8  | 527.6  | 467.9  | 696.6  | 545.4  | 647.9  | 551    | 0.046629773 | 496.3    | 610.225  | 113.925 | 0.813306567 | 0.02979 | 1.226  |
| 95514_at   | 540.1  | 538.8  | 665.5  | 744    | 464.9  | 429.9  | 493.8  | 423.4  | 0.037961053 | 622.1    | 453      | 169.1   | 1.373289183 | 0.01236 | -1.363 |
| 95516_at   | 2032   | 1870.2 | 2058.7 | 2080.7 | 2007.9 | 2077.3 | 2338.2 | 2163.6 | 0.170404516 | 2010.4   | 2146.75  | 136.35  | 0.936485385 | 0.1632  | 1.067  |
| 95517_i_at | 2416.9 | 2231.7 | 1637.8 | 1589.1 | 2288.2 | 2440.5 | 1693.8 | 1774.5 | 0.783284693 | 1968.875 | 2049.25  | 80.375  | 0.960778334 | 0.7607  | 1.046  |
| 95518_at   | 210.3  | 307.7  | 296.5  | 369.8  | 464    | 487.3  | 415.1  | 389    | 0.014192602 | 296.075  | 438.85   | 142.775 | 0.674661046 | 0.01889 | 1.506  |
| 95520_at   | 204.5  | 143.1  | 231.7  | 243.5  | 159.9  | 178.9  | 217.1  | 232.9  | 0.772637354 | 205.7    | 197.2    | 8.5     | 1.043103448 | 0.83    | -1.034 |
| 95521_s_at | 543.9  | 847.9  | 713.7  | 657.9  | 918.3  | 735.4  | 674.3  | 835.8  | 0.274574052 | 690.85   | 790.95   | 100.1   | 0.873443328 | 0.265   | 1.151  |



|            |        |        |        |        |        |        |        |        |             |          |          |         |             |          |        |
|------------|--------|--------|--------|--------|--------|--------|--------|--------|-------------|----------|----------|---------|-------------|----------|--------|
| 95522_i_at | 1385.5 | 1431.5 | 1473.3 | 1347.9 | 1560.3 | 1376.4 | 1464.4 | 1605.1 | 0.177780629 | 1409.55  | 1501.55  | 92      | 0.938729979 | 0.1664   | 1.064  |
| 95523_at   | 4624.6 | 4574.3 | 4072.8 | 4053.8 | 4554   | 4626.6 | 5176.4 | 4747.2 | 0.07744721  | 4331.375 | 4776.05  | 444.675 | 0.906894819 | 0.07538  | 1.103  |
| 95525_at   | 216    | 151.2  | 286.6  | 375.6  | 205.8  | 193.9  | 394.5  | 327.6  | 0.747008001 | 257.35   | 280.45   | 23.1    | 0.917632377 | 0.7263   | 1.101  |
| 95526_at   | 1200.8 | 1171.1 | 1503.5 | 1548.5 | 1299.4 | 1095.1 | 1402.4 | 1337.7 | 0.568650151 | 1355.975 | 1283.65  | 72.325  | 1.05634324  | 0.5945   | -1.052 |
| 95527_at   | 353.8  | 272.2  | 269.9  | 284.7  | 255.2  | 307.2  | 284.4  | 272.4  | 0.529719691 | 295.15   | 279.8    | 15.35   | 1.054860615 | 0.533    | -1.051 |
| 95528_at   | 175.6  | 122.8  | 102.1  | 123.6  | 149.7  | 170.8  | 108.5  | 160.7  | 0.460866829 | 131.025  | 147.425  | 16.4    | 0.888756995 | 0.4474   | 1.131  |
| 95529_at   | 819    | 427.5  | 620.4  | 659.2  | 450.8  | 1018   | 501.6  | 644.8  | 0.888668367 | 631.525  | 653.8    | 22.275  | 0.965929948 | 0.9697   | 1.009  |
| 95530_at   | 995.8  | 876.8  | 1139.4 | 1158.4 | 1013.7 | 1019.7 | 1163.6 | 1061.6 | 0.780757241 | 1042.6   | 1064.65  | 22.05   | 0.979288968 | 0.7363   | 1.026  |
| 95531_at   | 547.3  | 606.3  | 741.7  | 800.3  | 650.6  | 647.9  | 810.1  | 816.7  | 0.476111207 | 673.9    | 731.325  | 57.425  | 0.921478139 | 0.4572   | 1.091  |
| 95532_at   | 8.9    | 10.3   | 24.3   | 8.8    | 9.3    | 45.2   | 4.2    | 23.8   | 0.489331271 | 13.075   | 20.625   | 7.55    | 0.633939394 | 0.7506   | 1.211  |
| 95533_at   | 312.1  | 570.5  | 623.3  | 464.3  | 677.9  | 333.5  | 404.3  | 472.6  | 0.846264779 | 492.55   | 472.075  | 20.475  | 1.043372345 | 0.8443   | -1.045 |
| 95536_at   | 525.6  | 508.8  | 486.8  | 368.6  | 682.4  | 442.3  | 618.5  | 528.7  | 0.188805105 | 472.45   | 567.975  | 95.525  | 0.831814781 | 0.1986   | 1.198  |
| 95537_at   | 140.9  | 190.8  | 322.8  | 274.6  | 234.4  | 190.1  | 336    | 294.3  | 0.569200367 | 232.275  | 263.7    | 31.425  | 0.880830489 | 0.5189   | 1.166  |
| 95538_at   | 382.1  | 349.6  | 315.5  | 382.1  | 337    | 527.6  | 348.7  | 339.4  | 0.567217079 | 357.325  | 388.175  | 30.85   | 0.920525536 | 0.5912   | 1.069  |
| 95539_at   | 361.6  | 283.3  | 328.7  | 404.8  | 291.3  | 333.7  | 332.2  | 370    | 0.690255171 | 344.6    | 331.8    | 12.8    | 1.038577456 | 0.7273   | -1.033 |
| 95540_r_at | 68.9   | 54.4   | 85.2   | 86.4   | 101.8  | 153.4  | 71.5   | 125.1  | 0.105709152 | 73.725   | 112.95   | 39.225  | 0.652722444 | 0.08403  | 1.5    |
| 95541_at   | 883.3  | 800.7  | 892.2  | 944.3  | 779    | 761.4  | 999.9  | 945.4  | 0.901805169 | 880.125  | 871.425  | 8.7     | 1.009983647 | 0.8488   | 1.015  |
| 95542_at   | 6460.7 | 6450.6 | 5610.8 | 4959   | 4959.1 | 5456.6 | 6342.5 | 5603.3 | 0.568285131 | 5870.275 | 5590.375 | 279.9   | 1.050068198 | 0.5856   | -1.048 |
| 95543_at   | 694.7  | 741.4  | 774.9  | 758.7  | 409.7  | 574.5  | 1117   | 821.2  | 0.943895805 | 742.425  | 730.6    | 11.825  | 1.016185327 | 0.7123   | -1.088 |
| 95544_at   | 111.7  | 80.9   | 122    | 141.8  | 106    | 138.7  | 141    | 153.4  | 0.252451633 | 114.1    | 134.775  | 20.675  | 0.846596179 | 0.2608   | 1.195  |
| 95545_at   | 922.4  | 819.8  | 794.5  | 747.8  | 770.4  | 1034.5 | 926.3  | 709.7  | 0.658318833 | 821.125  | 860.225  | 39.1    | 0.954546776 | 0.7039   | 1.039  |
| 95546_g_at | 1735.1 | 1426.8 | 1597.8 | 1238   | 1606.2 | 1706   | 1981   | 1648   | 0.138065474 | 1499.425 | 1735.3   | 235.875 | 0.864072495 | 0.1338   | 1.163  |
| 95547_at   | 407.7  | 501.1  | 406.5  | 395.9  | 416.8  | 496.6  | 407.7  | 417.7  | 0.837460757 | 427.8    | 434.7    | 6.9     | 0.984126984 | 0.8152   | 1.018  |
| 95549_at   | 419.3  | 391.7  | 473.7  | 403.4  | 480.9  | 383.7  | 419.3  | 395.5  | 0.941192354 | 422.025  | 419.85   | 2.175   | 1.005180422 | 0.9256   | 1.006  |
| 95550_at   | 129.3  | 151.6  | 192.1  | 204.8  | 205.4  | 150.8  | 163.8  | 183.7  | 0.771861256 | 169.45   | 175.925  | 6.475   | 0.963194543 | 0.7197   | 1.049  |
| 95551_at   | 482.6  | 570.4  | 620.5  | 636.3  | 475.1  | 501.4  | 522.4  | 628    | 0.379186506 | 577.45   | 531.725  | 45.725  | 1.0859937   | 0.3799   | -1.086 |
| 95552_at   | 2.5    | 20.4   | 6.3    | 3      | 15.2   | 2.5    | 0.9    | 2.3    | 0.618643379 | 8.05     | 5.225    | 2.825   | 1.540669856 | 0.4388   | -1.873 |
| 95553_at   | 60.8   | 60.1   | 98.4   | 75.2   | 41.5   | 139.1  | 88.6   | 83.8   | 0.53947144  | 73.625   | 88.25    | 14.625  | 0.83427762  | 0.689    | 1.123  |
| 95554_at   | 50.8   | 49.5   | 55.4   | 61.7   | 53.9   | 51.6   | 45.5   | 37.4   | 0.170321949 | 54.35    | 47.1     | 7.25    | 1.153927813 | 0.1712   | -1.161 |
| 95555_at   | 1201.9 | 1115.4 | 1096.3 | 1222.6 | 1101.9 | 935.6  | 802.3  | 1003.2 | 0.042751376 | 1159.05  | 960.75   | 198.3   | 1.206401249 | 0.03663  | -1.213 |
| 95556_at   | 844.8  | 1070.4 | 853.8  | 706.9  | 918.5  | 788.3  | 633.1  | 696.7  | 0.303746661 | 868.975  | 759.15   | 109.825 | 1.144668379 | 0.2958   | -1.143 |
| 95557_at   | 520.9  | 615.9  | 631.6  | 758.6  | 621.8  | 473.6  | 532.5  | 636.1  | 0.332809871 | 631.75   | 566      | 65.75   | 1.116166078 | 0.3371   | -1.114 |
| 95559_at   | 1705.3 | 1532.7 | 1758.2 | 1171.5 | 1616.4 | 1836.2 | 1648.4 | 1619.6 | 0.388184255 | 1541.925 | 1680.15  | 138.225 | 0.91773056  | 0.3586   | 1.101  |
| 95561_at   | 334.6  | 426.5  | 357.5  | 363.1  | 369.8  | 227.7  | 280.5  | 324.8  | 0.110628486 | 370.425  | 300.7    | 69.725  | 1.231875624 | 0.1063   | -1.247 |
| 95562_at   | 5.2    | 3.2    | 1.8    | 3.1    | 3.2    | 4.9    | 2.2    | 2.5    | 0.897118462 | 3.325    | 3.2      | 0.125   | 1.0390625   | 0.9379   | 1.023  |
| 95563_at   | 310.2  | 210.9  | 422.9  | 472.8  | 200.3  | 285.6  | 533.6  | 354.7  | 0.911664107 | 354.2    | 343.55   | 10.65   | 1.030999854 | 0.8686   | -1.048 |
| 95564_at   | 165.9  | 164.3  | 241    | 258.7  | 189.6  | 159    | 191.3  | 239.2  | 0.686597297 | 207.475  | 194.775  | 12.7    | 1.06520344  | 0.7349   | -1.053 |
| 95565_at   | 669.8  | 579.3  | 570    | 552.9  | 670.7  | 627.1  | 552.2  | 662.6  | 0.386307868 | 593      | 628.15   | 35.15   | 0.944042028 | 0.3871   | 1.059  |
| 95566_at   | 52.8   | 61.6   | 78.7   | 72.5   | 102.4  | 124.3  | 100.7  | 67     | 0.065544497 | 66.4     | 98.6     | 32.2    | 0.673427992 | 0.05063  | 1.467  |
| 95567_at   | 171.6  | 141.7  | 251.4  | 336.8  | 163.6  | 136.6  | 241.9  | 245.8  | 0.606527036 | 225.375  | 196.975  | 28.4    | 1.144180734 | 0.6675   | -1.116 |
| 95568_at   | 145.1  | 195.7  | 210.5  | 222.1  | 287.3  | 151.8  | 238.4  | 256.5  | 0.287880381 | 193.35   | 233.5    | 40.15   | 0.828051392 | 0.3421   | 1.191  |
| 95569_at   | 20.4   | 16.5   | 15.4   | 12.7   | 8.8    | 21     | 5.9    | 17.7   | 0.498945845 | 16.25    | 13.35    | 2.9     | 1.217228464 | 0.3675   | -1.356 |
| 95571_at   | 721.5  | 620.6  | 893.8  | 753.1  | 937.6  | 720.5  | 729.7  | 772.5  | 0.592358692 | 747.25   | 790.075  | 42.825  | 0.945796285 | 0.5674   | 1.06   |
| 95573_at   | 404.4  | 403    | 654.6  | 665.2  | 568.1  | 466.3  | 530.9  | 660.1  | 0.783519643 | 531.8    | 556.35   | 24.55   | 0.955873101 | 0.6881   | 1.069  |
| 95574_f_at | 31     | 16.4   | 19.4   | 13.6   | 18.1   | 18.5   | 57.3   | 10.9   | 0.616099717 | 20.1     | 26.2     | 6.1     | 0.767175573 | 0.7844   | 1.119  |
| 95575_r_at | 122.7  | 65.4   | 76.8   | 91.5   | 51.1   | 128    | 75.3   | 99.4   | 0.975944325 | 89.1     | 88.45    | 0.65    | 1.007348785 | 0.8868   | -1.036 |
| 95577_at   | 634.7  | 734.7  | 616.5  | 774.8  | 703.9  | 732    | 705.5  | 775.1  | 0.403096376 | 690.175  | 729.125  | 38.95   | 0.946579805 | 0.3641   | 1.061  |
| 95580_at   | 337.1  | 486    | 267.4  | 470.7  | 388.3  | 357.4  | 235.9  | 306.4  | 0.323738835 | 390.3    | 322      | 68.3    | 1.212111801 | 0.3553   | -1.197 |
| 95584_at   | 68.9   | 72     | 54.8   | 79.5   | 62.3   | 60     | 58.7   | 78.8   | 0.600899458 | 68.8     | 64.95    | 3.85    | 1.059276366 | 0.6108   | -1.057 |
| 95585_at   | 64.5   | 110.6  | 110.1  | 105.5  | 67.7   | 92.6   | 62     | 114.3  | 0.441108677 | 97.675   | 84.15    | 13.525  | 1.160724896 | 0.4496   | -1.169 |
| 95586_at   | 181.1  | 244.6  | 177.9  | 204.6  | 417.1  | 305.2  | 309.6  | 354.6  | 0.005302616 | 202.05   | 346.625  | 144.575 | 0.582906599 | 0.001958 | 1.716  |
| 95587_at   | 406.6  | 344.5  | 342.9  | 300.4  | 336.6  | 374.8  | 353.9  | 375    | 0.653907217 | 348.6    | 360.075  | 11.475  | 0.968131639 | 0.6001   | 1.038  |
| 95588_at   | 324.2  | 340.8  | 219.8  | 293.4  | 340    | 368.3  | 255.9  | 250.7  | 0.826238464 | 294.55   | 303.725  | 9.175   | 0.969791752 | 0.8357   | 1.03   |
| 95590_at   | 707.6  | 621.9  | 686.6  | 592.7  | 718.9  | 656.7  | 845.1  | 750.8  | 0.111915804 | 652.2    | 742.875  | 90.675  | 0.877940434 | 0.1027   | 1.137  |
| 95591_at   | 595.2  | 627.2  | 746.7  | 888.9  | 596.3  | 488.4  | 585.5  | 752.1  | 0.254579678 | 714.5    | 605.575  | 108.925 | 1.179870371 | 0.2422   | -1.179 |
| 95592_at   | 807    | 611.1  | 563.7  | 515.5  | 609    | 522.1  | 542.2  | 608.7  | 0.474617006 | 624.325  | 570.5    | 53.825  | 1.094347064 | 0.485    | -1.081 |



|            |        |        |        |        |        |        |        |        |             |          |          |         |             |         |        |
|------------|--------|--------|--------|--------|--------|--------|--------|--------|-------------|----------|----------|---------|-------------|---------|--------|
| 95593_at   | 862.5  | 866.4  | 842    | 707.4  | 787.7  | 934.8  | 849.5  | 733.4  | 0.909979347 | 819.575  | 826.35   | 6.775   | 0.991801295 | 0.919   | 1.008  |
| 95594_at   | 326.8  | 352.6  | 514.8  | 580.8  | 449.3  | 364.1  | 427.7  | 475.6  | 0.836900018 | 443.75   | 429.175  | 14.575  | 1.033960506 | 0.9566  | 1.009  |
| 95595_at   | 34.7   | 65.8   | 43.9   | 27.1   | 76     | 168.7  | 17.8   | 68.2   | 0.298729198 | 42.875   | 82.675   | 39.8    | 0.518596916 | 0.4174  | 1.549  |
| 95596_at   | 266.1  | 256.7  | 292.7  | 363.2  | 254.2  | 232.5  | 280    | 311.3  | 0.429209625 | 294.675  | 269.5    | 25.175  | 1.093413729 | 0.4243  | -1.09  |
| 95597_at   | 33     | 36.2   | 47.8   | 42.2   | 47.1   | 55.1   | 54.7   | 65.2   | 0.019606871 | 39.8     | 55.525   | 15.725  | 0.716794237 | 0.01919 | 1.399  |
| 95599_at   | 2321.7 | 2448.9 | 1839.4 | 1758.8 | 2563.1 | 1998.8 | 1792.7 | 1955.3 | 0.953132352 | 2092.2   | 2077.475 | 14.725  | 1.007087931 | 0.9592  | 1.006  |
| 95600_at   | 262.1  | 240.9  | 285.1  | 309.3  | 205.9  | 191.5  | 268.5  | 290.5  | 0.265355078 | 274.35   | 239.1    | 35.25   | 1.147427854 | 0.2421  | -1.16  |
| 95601_at   | 648    | 593.8  | 818    | 985.8  | 676    | 600.3  | 752.6  | 805.2  | 0.62031638  | 761.4    | 708.525  | 52.875  | 1.074626866 | 0.6742  | -1.06  |
| 95602_at   | 1908.7 | 1767   | 1775.6 | 1768.4 | 1906.8 | 1937.9 | 1599.4 | 1848.4 | 0.83920993  | 1804.925 | 1823.125 | 18.2    | 0.990017141 | 0.8763  | 1.008  |
| 95603_at   | 105.4  | 72.9   | 110.3  | 124.8  | 56.4   | 110.8  | 82.9   | 122.7  | 0.60354311  | 103.35   | 93.2     | 10.15   | 1.108905579 | 0.5646  | -1.136 |
| 95604_at   | 869.8  | 912.6  | 699.6  | 1067.8 | 618.8  | 1030.6 | 655.5  | 619.8  | 0.262949251 | 887.45   | 731.175  | 156.275 | 1.213731323 | 0.2197  | -1.23  |
| 95606_at   | 266.4  | 198.4  | 299.7  | 355    | 298.6  | 229.6  | 259.2  | 264.3  | 0.658836184 | 279.875  | 262.925  | 16.95   | 1.064467053 | 0.7481  | -1.046 |
| 95607_at   | 991.4  | 926.5  | 953.9  | 896.3  | 890    | 1028.9 | 888.4  | 896.6  | 0.704360767 | 942.025  | 925.975  | 16.05   | 1.017333081 | 0.6735  | -1.019 |
| 95608_at   | 252.2  | 313.4  | 295.2  | 165.3  | 305.5  | 304    | 309.7  | 249    | 0.378411597 | 256.525  | 292.05   | 35.525  | 0.87835987  | 0.3517  | 1.167  |
| 95609_at   | 536.1  | 423.1  | 547.8  | 531.4  | 436.8  | 390.4  | 493.8  | 472.9  | 0.150991288 | 509.6    | 448.475  | 61.125  | 1.136295223 | 0.1634  | -1.135 |
| 95610_at   | 347    | 406.4  | 425.8  | 342.2  | 320.4  | 354.6  | 453.2  | 423    | 0.848092324 | 380.35   | 387.8    | 7.45    | 0.980789067 | 0.8862  | 1.015  |
| 95611_at   | 678.3  | 1244.2 | 807    | 613.8  | 1156.5 | 730.9  | 1640.6 | 987    | 0.269161552 | 835.825  | 1128.75  | 292.925 | 0.740487265 | 0.244   | 1.345  |
| 95612_at   | 596.4  | 536.9  | 639.1  | 584.2  | 593.1  | 620.3  | 520.2  | 651.5  | 0.846064516 | 589.15   | 596.275  | 7.125   | 0.988050815 | 0.8679  | 1.01   |
| 95613_at   | 776.4  | 787.6  | 899.7  | 990.6  | 679.8  | 796.3  | 1185   | 991.8  | 0.704251051 | 863.575  | 913.225  | 49.65   | 0.945632237 | 0.7843  | 1.039  |
| 95614_at   | 1148.1 | 1103.8 | 1350.7 | 1246   | 1130.9 | 1082.2 | 1380.3 | 1283.5 | 0.93862897  | 1212.15  | 1219.225 | 7.075   | 0.994197133 | 0.9562  | 1.004  |
| 95616_at   | 431.3  | 383.6  | 471.4  | 522.4  | 601.1  | 487.7  | 512.5  | 532.3  | 0.079509443 | 452.175  | 533.4    | 81.225  | 0.84772216  | 0.0778  | 1.184  |
| 95617_at   | 119    | 142.3  | 162    | 184.8  | 202.3  | 145.3  | 206.2  | 202.2  | 0.117573792 | 152.025  | 189      | 36.975  | 0.804365079 | 0.1312  | 1.247  |
| 95618_at   | 238.2  | 293.8  | 332.7  | 542    | 333.6  | 329.1  | 343.9  | 433.9  | 0.911029019 | 351.675  | 360.125  | 8.45    | 0.976535925 | 0.7381  | 1.067  |
| 95619_at   | 180.7  | 192.5  | 216.6  | 252.5  | 197.1  | 196.9  | 183.4  | 227.4  | 0.632281295 | 210.575  | 201.2    | 9.375   | 1.046595427 | 0.6557  | -1.041 |
| 95620_at   | 1092.5 | 1098.7 | 873.5  | 836.1  | 1213.5 | 1239.3 | 998.3  | 982.5  | 0.222285899 | 975.2    | 1108.4   | 133.2   | 0.879826777 | 0.2205  | 1.139  |
| 95621_at   | 104.6  | 144.9  | 108.4  | 106.1  | 116.7  | 135.4  | 87.7   | 98     | 0.662977959 | 116      | 109.45   | 6.55    | 1.059844678 | 0.6295  | -1.065 |
| 95622_at   | 1237.4 | 1464.1 | 1450.9 | 1548.4 | 1415.5 | 1422.9 | 1372.3 | 1473.9 | 0.956577735 | 1425.2   | 1421.15  | 4.05    | 1.002849805 | 0.9967  | 1      |
| 95625_at   | 287.7  | 330.4  | 447.9  | 422.1  | 337.8  | 261.9  | 292.1  | 412.1  | 0.39267232  | 372.025  | 325.975  | 46.05   | 1.141268502 | 0.3949  | -1.14  |
| 95626_at   | 270.5  | 304.8  | 331.4  | 330.7  | 341.9  | 276.7  | 276.7  | 361.8  | 0.858751773 | 309.35   | 314.275  | 4.925   | 0.984329011 | 0.8946  | 1.012  |
| 95627_at   | 605.1  | 750.9  | 696.4  | 1312.5 | 494.3  | 607.2  | 1115.1 | 1134.6 | 0.988676827 | 841.225  | 837.8    | 3.425   | 1.004088088 | 0.937   | -1.023 |
| 95628_at   | 150.4  | 198.8  | 144.3  | 210.8  | 160.3  | 118.3  | 139.4  | 170.7  | 0.21291895  | 176.075  | 147.175  | 28.9    | 1.196364872 | 0.2134  | -1.191 |
| 95629_at   | 1873.4 | 2097.7 | 1767   | 1580.3 | 1842.6 | 1924.8 | 1738.9 | 1589.7 | 0.685681445 | 1829.6   | 1774     | 55.6    | 1.031341601 | 0.7092  | -1.029 |
| 95630_at   | 450    | 393.9  | 407.4  | 459.6  | 408.8  | 482.8  | 334.4  | 363.4  | 0.44328222  | 427.725  | 397.35   | 30.375  | 1.076443941 | 0.3916  | -1.085 |
| 95631_at   | 2240.4 | 2350.3 | 2038.6 | 2455.4 | 1897.5 | 2248.7 | 2006.3 | 2245   | 0.219158761 | 2271.175 | 2099.375 | 171.8   | 1.081833879 | 0.2232  | -1.082 |
| 95632_f_at | 49.3   | 99.7   | 79.7   | 83.3   | 108.7  | 40.4   | 95.6   | 41.4   | 0.767895938 | 78       | 71.525   | 6.475   | 1.090527787 | 0.6236  | -1.171 |
| 95633_r_at | 547.8  | 429.3  | 403.1  | 428.9  | 382.4  | 558.5  | 351.9  | 366.7  | 0.547207986 | 452.275  | 414.875  | 37.4    | 1.090147635 | 0.4702  | -1.102 |
| 95634_at   | 827.2  | 907.7  | 575.5  | 603.9  | 765.8  | 638.6  | 595.6  | 641.1  | 0.488170033 | 728.575  | 660.275  | 68.3    | 1.103441748 | 0.5291  | -1.087 |
| 95635_g_at | 1080.3 | 1220.9 | 915.8  | 935.8  | 1170   | 1068.8 | 810.4  | 1008.5 | 0.826567152 | 1038.2   | 1014.425 | 23.775  | 1.023436922 | 0.8148  | -1.026 |
| 95636_at   | 1324.9 | 1342.8 | 741    | 799.9  | 1151.8 | 992.6  | 914.2  | 943.4  | 0.779767107 | 1052.15  | 1000.5   | 51.65   | 1.051624188 | 0.9233  | 1.017  |
| 95637_at   | 359.9  | 320.7  | 387.2  | 381.4  | 271.5  | 355.6  | 397.5  | 418.9  | 0.970122212 | 362.3    | 360.875  | 1.425   | 1.003948736 | 0.8946  | 1.015  |
| 95639_at   | 46.2   | 96.4   | 27.8   | 33.3   | 117.4  | 89.9   | 134.6  | 31.7   | 0.178420802 | 50.925   | 93.4     | 42.475  | 0.545235546 | 0.2115  | 1.818  |
| 95641_at   | 1704.6 | 3081.6 | 1623.4 | 1006.6 | 2375.9 | 1181.4 | 2563.2 | 1943.3 | 0.773440121 | 1854.05  | 2015.95  | 161.9   | 0.919690469 | 0.6867  | 1.13   |
| 95642_at   | 194    | 203.7  | 106.5  | 279    | 139.4  | 178.5  | 481.9  | 338.8  | 0.35879078  | 195.8    | 284.65   | 88.85   | 0.687862287 | 0.4084  | 1.364  |
| 95643_at   | 566.6  | 400.4  | 731.4  | 690.4  | 556.2  | 629.5  | 571.5  | 720.1  | 0.80207928  | 597.2    | 619.325  | 22.125  | 0.964275623 | 0.7121  | 1.059  |
| 95645_at   | 244.8  | 134.1  | 122.3  | 172.4  | 139.1  | 215.5  | 136.2  | 163.9  | 0.892049416 | 168.4    | 163.675  | 4.725   | 1.028868184 | 0.9661  | 1.008  |
| 95646_at   | 1655.4 | 1590.9 | 1505.1 | 1400.6 | 1837.7 | 1632.8 | 1481.2 | 1446.8 | 0.581900928 | 1538     | 1599.625 | 61.625  | 0.961475346 | 0.5947  | 1.037  |
| 95647_f_at | 1508.5 | 1466.3 | 1803.8 | 1861.7 | 1705.8 | 1428.1 | 1877   | 1920.1 | 0.646146739 | 1660.075 | 1732.75  | 72.675  | 0.958058    | 0.6614  | 1.043  |
| 95648_at   | 1938.7 | 1696.4 | 2008.2 | 1941.4 | 1712.8 | 1786.1 | 2088.8 | 1774.3 | 0.627354224 | 1896.175 | 1840.5   | 55.675  | 1.030249932 | 0.6138  | -1.031 |
| 95649_at   | 814.2  | 797.3  | 816.4  | 674.5  | 933.3  | 885.9  | 926.6  | 1015.2 | 0.009937095 | 775.6    | 940.25   | 164.65  | 0.824886998 | 0.01133 | 1.214  |
| 95650_at   | 4040.6 | 3233.6 | 3278.4 | 3196   | 3067.5 | 3709.6 | 3606.7 | 3254.6 | 0.916622057 | 3437.15  | 3409.6   | 27.55   | 1.008080127 | 0.934   | 1.006  |
| 95651_at   | 84.4   | 100.5  | 85.4   | 69.6   | 89.2   | 106.8  | 86.7   | 71.3   | 0.727080222 | 84.975   | 88.5     | 3.525   | 0.960169492 | 0.7422  | 1.039  |
| 95652_at   | 7921.6 | 8813.9 | 5721.2 | 5486.3 | 7482.3 | 7233.3 | 5122.4 | 5719   | 0.575494774 | 6985.75  | 6389.25  | 596.5   | 1.093359941 | 0.607   | -1.084 |
| 95653_at   | 967.2  | 812.7  | 835.8  | 719.1  | 831    | 947.2  | 773.1  | 893.5  | 0.681752917 | 833.7    | 861.2    | 27.5    | 0.968067812 | 0.6568  | 1.036  |
| 95654_at   | 2876.6 | 3143.6 | 2797.9 | 2608.1 | 3249.6 | 3351   | 3496.4 | 3173.7 | 0.016714675 | 2856.55  | 3317.675 | 461.125 | 0.861009593 | 0.01373 | 1.163  |
| 95655_at   | 234    | 190.2  | 337    | 431.1  | 258    | 119.9  | 158.4  | 269.1  | 0.19566558  | 298.075  | 201.35   | 96.725  | 1.480382419 | 0.1886  | -1.488 |
| 95656_i_at | 237.3  | 383.5  | 478.8  | 436    | 407.8  | 323    | 404.4  | 423.3  | 0.925080292 | 383.9    | 389.625  | 5.725   | 0.985306384 | 0.8071  | 1.044  |



|            |        |        |        |        |        |        |        |        |             |          |          |         |             |          |        |
|------------|--------|--------|--------|--------|--------|--------|--------|--------|-------------|----------|----------|---------|-------------|----------|--------|
| 95657_f_at | 1746.1 | 2046.8 | 2256.8 | 2028.2 | 2104.3 | 2027.7 | 1836.9 | 1880.8 | 0.660215888 | 2019.475 | 1962.425 | 57.05   | 1.029071175 | 0.688    | -1.026 |
| 95658_at   | 493.3  | 626    | 467    | 513.4  | 575.4  | 510.3  | 589.3  | 380.7  | 0.859030961 | 524.925  | 513.925  | 11      | 1.021403901 | 0.8137   | -1.03  |
| 95659_at   | 1027.8 | 1136.2 | 1173.4 | 1100.6 | 1201.9 | 1146.7 | 1153.6 | 1228.8 | 0.101832724 | 1109.5   | 1182.75  | 73.25   | 0.938068062 | 0.09583  | 1.067  |
| 95660_at   | 562.5  | 561.9  | 532.8  | 480.3  | 557    | 687.5  | 648.3  | 536.8  | 0.139584473 | 534.375  | 607.4    | 73.025  | 0.879774448 | 0.1247   | 1.133  |
| 95661_at   | 748.9  | 872    | 708.3  | 882.1  | 819.3  | 747.6  | 749.1  | 693.1  | 0.366311057 | 802.825  | 752.275  | 50.55   | 1.067196172 | 0.3723   | -1.064 |
| 95662_at   | 1011.7 | 891.9  | 934.4  | 909.4  | 821.1  | 991    | 835.5  | 878.2  | 0.285619427 | 936.85   | 881.45   | 55.4    | 1.062850984 | 0.2631   | -1.065 |
| 95663_at   | 25.6   | 12.2   | 5.1    | 10.2   | 5.5    | 13.5   | 6.3    | 11.7   | 0.446815612 | 13.275   | 9.25     | 4.025   | 1.435135135 | 0.5172   | -1.315 |
| 95664_at   | 104.9  | 99.7   | 181.2  | 207.8  | 102.7  | 143.1  | 309.1  | 233.3  | 0.407359597 | 148.4    | 197.05   | 48.65   | 0.753108348 | 0.4538   | 1.281  |
| 95665_at   | 423.9  | 366.8  | 484.7  | 614.1  | 526.2  | 460.7  | 581.9  | 529.4  | 0.420340224 | 472.375  | 524.55   | 52.175  | 0.900533791 | 0.3557   | 1.127  |
| 95666_at   | 1741   | 1535.3 | 1387.1 | 1305.8 | 1582.1 | 1675.4 | 1440.6 | 1424.9 | 0.74676721  | 1492.3   | 1530.75  | 38.45   | 0.974881594 | 0.7068   | 1.03   |
| 95668_at   | 77.8   | 58.4   | 57     | 24.5   | 40.1   | 98.7   | 12.6   | 41.7   | 0.783401374 | 54.425   | 48.275   | 6.15    | 1.127395132 | 0.5892   | -1.323 |
| 95669_g_at | 232.6  | 233.5  | 203.2  | 187.8  | 168.5  | 291.5  | 229.2  | 205.1  | 0.757784836 | 214.275  | 223.575  | 9.3     | 0.95840322  | 0.8376   | 1.027  |
| 95670_at   | 83.8   | 60.7   | 73.1   | 84.6   | 41.3   | 142.8  | 83.3   | 67.4   | 0.735582221 | 75.55    | 83.7     | 8.15    | 0.902628435 | 0.9628   | 1.013  |
| 95671_at   | 201.7  | 185.9  | 218.4  | 220.5  | 262.3  | 321    | 333.6  | 270.3  | 0.009057955 | 206.625  | 296.8    | 90.175  | 0.696175876 | 0.002552 | 1.432  |
| 95672_at   | 66.2   | 66.2   | 32.9   | 24.9   | 64.9   | 72.7   | 49.3   | 42.9   | 0.476299125 | 47.55    | 57.45    | 9.9     | 0.82767624  | 0.3909   | 1.292  |
| 95673_s_at | 1585.6 | 1563.7 | 1670.7 | 1818.2 | 1591.2 | 1790.1 | 1904.2 | 1932.8 | 0.188068865 | 1659.55  | 1804.575 | 145.025 | 0.919634817 | 0.1896   | 1.086  |
| 95674_r_at | 2085.9 | 2118.8 | 1874.3 | 1743   | 1435.5 | 2611.4 | 1659.9 | 1905   | 0.855843955 | 1955.5   | 1902.95  | 52.55   | 1.027615019 | 0.7289   | -1.051 |
| 95675_at   | 849.9  | 801.7  | 962.2  | 1027.6 | 965.6  | 801.6  | 974.6  | 1065   | 0.602645379 | 910.35   | 951.7    | 41.35   | 0.956551434 | 0.6122   | 1.045  |
| 95676_at   | 12.1   | 9.9    | 6.1    | 9.3    | 7.6    | 13     | 8.1    | 11.4   | 0.720170576 | 9.35     | 10.025   | 0.675   | 0.932668329 | 0.7215   | 1.075  |
| 95677_at   | 994.2  | 902.5  | 917.2  | 944.6  | 870.1  | 1007.3 | 980.4  | 980    | 0.609805843 | 939.625  | 959.45   | 19.825  | 0.97933712  | 0.6269   | 1.02   |
| 95679_at   | 532.8  | 462.5  | 464.5  | 440.4  | 405.9  | 449.4  | 466.1  | 440.7  | 0.20399713  | 475.05   | 440.525  | 34.525  | 1.078372397 | 0.1904   | -1.077 |
| 95680_at   | 205.4  | 143.3  | 186.9  | 176    | 146.2  | 276.1  | 202.6  | 240.8  | 0.27410488  | 177.9    | 216.425  | 38.525  | 0.821993762 | 0.3021   | 1.194  |
| 95681_f_at | 147.1  | 165    | 220.7  | 273.6  | 189.6  | 129.8  | 172.8  | 239.9  | 0.63079603  | 201.6    | 183.025  | 18.575  | 1.101488868 | 0.6506   | -1.095 |
| 95682_at   | 5814.6 | 5053.2 | 4451.1 | 4996.9 | 5308.2 | 5104.6 | 5589.7 | 4888.1 | 0.671597274 | 5078.95  | 5222.65  | 143.7   | 0.972485233 | 0.6313   | 1.032  |
| 95683_g_at | 3822.2 | 4016.8 | 3806.1 | 3802   | 3959.6 | 4254.2 | 3923.1 | 4194.6 | 0.072968616 | 3861.775 | 4082.875 | 221.1   | 0.945846983 | 0.06262  | 1.057  |
| 95684_at   | 26.3   | 32.8   | 35.4   | 42.6   | 44     | 58.5   | 40.2   | 32     | 0.207391127 | 34.275   | 43.675   | 9.4     | 0.784773898 | 0.1951   | 1.263  |
| 95685_at   | 605.8  | 564    | 475.4  | 365.9  | 475.9  | 448.5  | 433.7  | 443    | 0.39810954  | 502.775  | 450.275  | 52.5    | 1.116595414 | 0.4458   | -1.097 |
| 95686_at   | 141.4  | 85.7   | 81.2   | 107.5  | 99.6   | 116.2  | 94     | 94.3   | 0.852334421 | 103.95   | 101.025  | 2.925   | 1.028953229 | 0.9589   | 1.007  |
| 95688_at   | 1614   | 1919.4 | 1828.8 | 1670.4 | 2003.8 | 1673.7 | 1878.8 | 1867.5 | 0.35678006  | 1758.15  | 1855.95  | 97.8    | 0.947304615 | 0.3578   | 1.056  |
| 95689_at   | 797.1  | 692    | 1234.3 | 867.2  | 874.6  | 1061.5 | 958.3  | 810.2  | 0.83639645  | 897.65   | 926.15   | 28.5    | 0.969227447 | 0.727    | 1.051  |
| 95690_at   | 1533.9 | 1319.8 | 1440.8 | 1173.7 | 1505.5 | 1521.4 | 1336.5 | 1233.7 | 0.767856057 | 1367.05  | 1399.275 | 32.225  | 0.976970217 | 0.7601   | 1.025  |
| 95692_at   | 2065.2 | 1748.1 | 2200.5 | 1714.6 | 1770.8 | 2218.7 | 2027.3 | 2011.5 | 0.637315368 | 1932.1   | 2007.075 | 74.975  | 0.962644645 | 0.6176   | 1.041  |
| 95693_at   | 2952.3 | 2737.6 | 2767.5 | 2276.7 | 2667.3 | 2856.6 | 3022.4 | 2770.9 | 0.413848808 | 2683.525 | 2829.3   | 145.775 | 0.948476655 | 0.3963   | 1.058  |
| 95694_at   | 4317.5 | 4694.3 | 3669.2 | 3611.4 | 4274.5 | 3666.9 | 3897.4 | 3895.2 | 0.654082162 | 4073.1   | 3933.5   | 139.6   | 1.035490022 | 0.6853   | -1.031 |
| 95695_at   | 1073.1 | 991.2  | 959.5  | 811.3  | 865.8  | 828.6  | 804.5  | 769.9  | 0.07534664  | 958.775  | 817.2    | 141.575 | 1.173244004 | 0.05062  | -1.168 |
| 95696_at   | 4085.9 | 5380.8 | 4105.3 | 4503.1 | 5668.1 | 4376.8 | 5356.8 | 5185.2 | 0.176464151 | 4518.775 | 5146.725 | 627.95  | 0.877990373 | 0.1717   | 1.141  |
| 95697_at   | 70.5   | 38.1   | 45.9   | 47.5   | 33     | 98     | 71.5   | 68.5   | 0.30893615  | 50.5     | 67.75    | 17.25   | 0.745387454 | 0.3824   | 1.282  |
| 95698_at   | 5337   | 5116   | 3800.6 | 3051.4 | 4284.7 | 4586.2 | 3407.4 | 3280   | 0.521079654 | 4326.25  | 3889.575 | 436.675 | 1.11226805  | 0.5782   | -1.096 |
| 95699_f_at | 5690.4 | 4867   | 4318.9 | 3966.4 | 4733   | 4647.2 | 4623.3 | 4122.8 | 0.678762325 | 4710.675 | 4531.575 | 179.1   | 1.039522683 | 0.7264   | 1.031  |
| 95700_r_at | 2276.8 | 2140.7 | 2114.5 | 1820.5 | 2324.1 | 1841   | 2037.4 | 1744   | 0.551014996 | 2088.125 | 1986.625 | 101.5   | 1.051091676 | 0.5303   | -1.054 |
| 95701_at   | 1091   | 1006.8 | 1406.6 | 1605.3 | 902.3  | 827.5  | 808.3  | 882.1  | 0.054202616 | 1277.425 | 855.05   | 422.375 | 1.49397696  | 0.01376  | -1.469 |
| 95702_at   | 577.4  | 608.6  | 618.7  | 749.1  | 555.9  | 736.9  | 916.7  | 841.3  | 0.220573323 | 638.45   | 762.7    | 124.25  | 0.83709191  | 0.2276   | 1.18   |
| 95703_at   | 1308.3 | 1308.1 | 1537.4 | 1642.9 | 1515   | 1334.2 | 1511.7 | 1598.9 | 0.702341788 | 1449.175 | 1489.95  | 40.775  | 0.97263331  | 0.6748   | 1.031  |
| 95704_at   | 865.3  | 781.9  | 945.1  | 917    | 835.6  | 824    | 795.4  | 922.7  | 0.495286921 | 877.325  | 844.425  | 32.9    | 1.038961423 | 0.5053   | -1.038 |
| 95705_s_at | 429.7  | 802.4  | 345.4  | 618    | 708.6  | 629.8  | 578.5  | 592.5  | 0.5058586   | 548.875  | 627.35   | 78.475  | 0.874910337 | 0.3795   | 1.201  |
| 95706_at   | 74.5   | 129.5  | 80.8   | 68.3   | 102    | 76.9   | 85.1   | 68.1   | 0.753551337 | 88.275   | 83.025   | 5.25    | 1.063233966 | 0.8181   | -1.041 |
| 95707_at   | 1593.2 | 2291.8 | 1004.2 | 1045.5 | 1649.5 | 1203.7 | 941.4  | 1216   | 0.525235517 | 1483.675 | 1252.65  | 231.025 | 1.18442901  | 0.5842   | -1.14  |
| 95708_at   | 2178   | 1925.9 | 2891.6 | 2654.3 | 1850.3 | 1760.6 | 2772.3 | 2336.7 | 0.49683919  | 2412.45  | 2179.975 | 232.475 | 1.106641131 | 0.4804   | -1.111 |
| 95709_at   | 3658.9 | 4112.5 | 3108.7 | 2735.1 | 4026   | 3946.8 | 3748.4 | 3301.7 | 0.356740973 | 3403.8   | 3755.725 | 351.925 | 0.906296388 | 0.3244   | 1.113  |
| 95712_at   | 1632.3 | 1275.6 | 883.2  | 1025   | 1252   | 1198.3 | 1171.4 | 1271   | 0.915093955 | 1204.025 | 1223.175 | 19.15   | 0.984344023 | 0.7642   | 1.043  |
| 95713_at   | 1450.2 | 1232.9 | 1745.1 | 1414.6 | 1462.4 | 1205.8 | 1125.1 | 1484.7 | 0.351349424 | 1460.7   | 1319.5   | 141.2   | 1.107010231 | 0.3492   | -1.106 |
| 95714_at   | 2196.9 | 2538.9 | 2239.8 | 2346.1 | 2639.5 | 2195.6 | 2688.4 | 2451.4 | 0.278480898 | 2330.425 | 2493.725 | 163.3   | 0.934515634 | 0.2828   | 1.068  |
| 95715_at   | 6875.9 | 7780.5 | 4214.9 | 3679.5 | 5773.7 | 5606.2 | 3711.5 | 3896.5 | 0.472180754 | 5637.7   | 4746.975 | 890.725 | 1.18764055  | 0.5337   | -1.154 |
| 95716_at   | 4382.5 | 3217.7 | 4421.7 | 4271.9 | 3189.9 | 3218.5 | 3841.4 | 3818.9 | 0.161303169 | 4073.45  | 3517.175 | 556.275 | 1.158159603 | 0.1724   | -1.153 |
| 95717_at   | 1367.7 | 1328.1 | 1431.7 | 960.4  | 1557.1 | 1390   | 914.1  | 1018.6 | 0.789291724 | 1271.975 | 1219.95  | 52.025  | 1.04264519  | 0.7416   | -1.055 |
| 95718_f_at | 8084   | 9509.7 | 6655.7 | 7215.5 | 8037.5 | 6722.8 | 7482.5 | 6467.7 | 0.383124471 | 7866.225 | 7177.625 | 688.6   | 1.095937027 | 0.3843   | -1.09  |



|            |        |        |        |        |        |        |        |         |             |          |          |         |             |          |        |
|------------|--------|--------|--------|--------|--------|--------|--------|---------|-------------|----------|----------|---------|-------------|----------|--------|
| 95719_at   | 46.6   | 16.3   | 10.1   | 48.4   | 12.1   | 17.3   | 17.4   | 29.6    | 0.353344765 | 30.35    | 19.1     | 11.25   | 1.589005236 | 0.4973   | -1.365 |
| 95721_at   | 1670.6 | 1494.3 | 1963.7 | 1721.4 | 1344.9 | 1655.3 | 1300.7 | 1794.8  | 0.268931134 | 1712.5   | 1523.925 | 188.575 | 1.123742966 | 0.2561   | -1.129 |
| 95722_at   | 826.2  | 950.1  | 742.6  | 769.1  | 1187.6 | 1231.9 | 1113.5 | 981.6   | 0.005538261 | 822      | 1128.65  | 306.65  | 0.728303726 | 0.005077 | 1.374  |
| 95723_r_at | 6430.9 | 6182.2 | 6488.1 | 5794.7 | 5118.9 | 6494.6 | 5499.6 | 5774.8  | 0.193955229 | 6223.975 | 5721.975 | 502     | 1.087731946 | 0.1734   | -1.091 |
| 95725_at   | 190.3  | 195.2  | 244.3  | 221.6  | 169.5  | 196.9  | 206.9  | 196.2   | 0.226042153 | 212.85   | 192.375  | 20.475  | 1.106432749 | 0.221    | -1.104 |
| 95726_at   | 1176   | 1199.3 | 1195.6 | 1455.2 | 1005.2 | 1181.2 | 1122.2 | 1133.8  | 0.117049174 | 1256.525 | 1110.6   | 145.925 | 1.131392941 | 0.09428  | -1.129 |
| 95727_at   | 11.9   | 12     | 38.6   | 32.7   | 10.8   | 42.5   | 9.7    | 11.6    | 0.643527063 | 23.8     | 18.65    | 5.15    | 1.27613941  | 0.5306   | -1.367 |
| 95728_g_at | 187.9  | 97     | 105.2  | 105.3  | 69.2   | 139.4  | 105.6  | 123.4   | 0.60348247  | 123.85   | 109.4    | 14.45   | 1.132084095 | 0.6042   | -1.125 |
| 95729_at   | 3.5    | 7.2    | 2.4    | 3.8    | 4.8    | 3      | 5      | 5.5     | 0.778208531 | 4.225    | 4.575    | 0.35    | 0.923497268 | 0.6394   | 1.141  |
| 95730_at   | 1037.7 | 887.6  | 958.6  | 854.2  | 692.6  | 542.5  | 671.9  | 888.9   | 0.037334345 | 934.525  | 698.975  | 235.55  | 1.336993455 | 0.03298  | -1.354 |
| 95731_at   | 1441.8 | 1449.8 | 1390.9 | 1485.1 | 1573   | 1640.5 | 1837.3 | 1748.2  | 0.016590794 | 1441.9   | 1699.75  | 257.85  | 0.848301221 | 0.004454 | 1.177  |
| 95732_at   | 2295.7 | 2322.3 | 1810.5 | 1681.9 | 2279.8 | 1872.6 | 2068.8 | 1710.1  | 0.83541242  | 2027.6   | 1982.825 | 44.775  | 1.022581418 | 0.8667   | 1.018  |
| 95733_at   | 3166.4 | 2910.2 | 2387.2 | 1588.5 | 2327.3 | 2504.7 | 2517.2 | 2025.6  | 0.670302177 | 2513.075 | 2343.7   | 169.375 | 1.072268208 | 0.8109   | -1.041 |
| 95734_at   | 733.1  | 411.7  | 413.7  | 475.9  | 435.9  | 697.5  | 408.6  | 376.5   | 0.79383141  | 508.6    | 479.625  | 28.975  | 1.06041178  | 0.7682   | -1.062 |
| 95735_at   | 291.3  | 263.1  | 281.5  | 213.6  | 170.9  | 155.9  | 230.9  | 207.1   | 0.026207232 | 262.375  | 191.2    | 71.175  | 1.372254184 | 0.02955  | -1.379 |
| 95736_at   | 2149.3 | 2023   | 1703.2 | 1445.3 | 1553   | 1805.6 | 1384.3 | 1438.6  | 0.184957052 | 1830.2   | 1545.375 | 284.825 | 1.184308016 | 0.1795   | -1.177 |
| 95737_at   | 950.6  | 1067.6 | 1231   | 1341.9 | 1469   | 1232.7 | 1324   | 1411.8  | 0.091053503 | 1147.775 | 1359.375 | 211.6   | 0.84434023  | 0.08545  | 1.192  |
| 95738_at   | 89.5   | 134.6  | 202.7  | 176.1  | 147.4  | 143.2  | 207.3  | 186.2   | 0.517701996 | 150.725  | 171.025  | 20.3    | 0.881303903 | 0.4574   | 1.173  |
| 95739_at   | 36.1   | 22     | 13.1   | 30.8   | 17.6   | 19.8   | 18     | 27      | 0.422824817 | 25.5     | 20.6     | 4.9     | 1.237864078 | 0.5403   | -1.172 |
| 95740_at   | 253.2  | 166.3  | 210.8  | 236    | 181    | 212.5  | 272    | 220.1   | 0.862530664 | 216.575  | 221.4    | 4.825   | 0.978206865 | 0.8548   | 1.024  |
| 95742_at   | 1378.9 | 1290.9 | 1398.4 | 1143.8 | 1483.5 | 1300.8 | 1222.4 | 1123.5  | 0.838409469 | 1303     | 1282.55  | 20.45   | 1.015944797 | 0.8173   | 1.018  |
| 95743_at   | 1829   | 1994.2 | 2010.2 | 2354.7 | 2313.8 | 2033.2 | 2207.6 | 2315.1  | 0.244160945 | 2047.025 | 2217.425 | 170.4   | 0.923154109 | 0.2226   | 1.086  |
| 95744_at   | 722.1  | 708.9  | 926.8  | 754.3  | 976.1  | 940.9  | 888.1  | 787.3   | 0.11678977  | 778.025  | 898.1    | 120.075 | 0.86630108  | 0.1085   | 1.157  |
| 95745_g_at | 676.3  | 709    | 573.4  | 543.6  | 820.6  | 712.1  | 695.7  | 692.3   | 0.084932195 | 625.575  | 730.175  | 104.6   | 0.85674667  | 0.08078  | 1.171  |
| 95746_at   | 1989.6 | 2015.6 | 2157.5 | 1637   | 2222.9 | 2287   | 2121.7 | 1689.7  | 0.483489305 | 1949.925 | 2080.325 | 130.4   | 0.937317486 | 0.5138   | 1.065  |
| 95747_at   | 1.6    | 1.1    | 0.6    | 0.9    | 1      | 1.1    | 1      | 1       | 0.913242419 | 1.05     | 1.025    | 0.025   | 1.024390244 | 0.8754   | 1.034  |
| 95749_at   | 2141.1 | 2408.6 | 1903   | 2522   | 2535.9 | 2194   | 2920.6 | 2263.7  | 0.318643373 | 2243.675 | 2478.55  | 234.875 | 0.905236933 | 0.3157   | 1.104  |
| 95750_at   | 687.3  | 610.1  | 650.5  | 638.6  | 768    | 629.7  | 490    | 732.8   | 0.902428091 | 646.625  | 655.125  | 8.5     | 0.987025377 | 0.994    | 1.001  |
| 95752_at   | 1314   | 664    | 827.3  | 862.1  | 734.9  | 1099.5 | 983.9  | 930.9   | 0.902850098 | 916.85   | 937.3    | 20.45   | 0.978182012 | 0.8028   | 1.044  |
| 95753_at   | 466.7  | 362    | 443    | 522.3  | 472    | 386.3  | 446.2  | 448.9   | 0.800669171 | 448.5    | 438.35   | 10.15   | 1.023155013 | 0.8535   | -1.017 |
| 95754_at   | 2034.9 | 1638.1 | 1469   | 1957.9 | 1569.3 | 1427.2 | 1791.3 | 1869.2  | 0.534848708 | 1774.975 | 1664.25  | 110.725 | 1.066531471 | 0.5553   | -1.063 |
| 95755_at   | 805.6  | 743.2  | 819.5  | 1107   | 793.4  | 810.9  | 957.2  | 929.3   | 0.967878175 | 868.825  | 872.7    | 3.875   | 0.995559757 | 0.8996   | 1.013  |
| 95756_at   | 355.8  | 434.3  | 405.2  | 368.9  | 532.5  | 408.7  | 407.3  | 436.1   | 0.171886145 | 391.05   | 446.15   | 55.1    | 0.876498935 | 0.1479   | 1.137  |
| 95758_at   | 6158.5 | 8687.7 | 7828.5 | 8751.3 | 8391.4 | 7482.3 | 8620.1 | 10182.7 | 0.362502593 | 7856.5   | 8669.125 | 812.625 | 0.906262166 | 0.3638   | 1.107  |
| 95759_at   | 367.3  | 362.2  | 382.4  | 461.7  | 396.1  | 430.1  | 379.1  | 415.4   | 0.669010096 | 393.4    | 405.175  | 11.775  | 0.970938483 | 0.6146   | 1.034  |
| 95760_at   | 1655.4 | 1664.9 | 1267.5 | 1026.2 | 1272.9 | 1378.8 | 1010.2 | 1147.6  | 0.308986141 | 1403.5   | 1202.375 | 201.125 | 1.167273105 | 0.3333   | -1.152 |
| 95765_at   | 4121.5 | 4186.4 | 3456.9 | 3341   | 3252.9 | 2896.8 | 3158.6 | 3102.7  | 0.048469754 | 3776.45  | 3102.75  | 673.7   | 1.217129965 | 0.02298  | -1.212 |
| 95766_f_at | 1.9    | 1.4    | 1.2    | 1.4    | 1.5    | 1.9    | 1.3    | 1.3     | 0.907223137 | 1.475    | 1.5      | 0.025   | 0.983333333 | 0.7774   | 1.04   |
| 95770_s_at | 49.8   | 13.6   | 29.6   | 22.5   | 24     | 59.3   | 42.3   | 43.5    | 0.251577398 | 28.875   | 42.275   | 13.4    | 0.683027794 | 0.2315   | 1.553  |
| 95771_i_at | 23.6   | 3.8    | 13.2   | 4.2    | 4.7    | 39.3   | 38.6   | 44.7    | 0.10759049  | 11.2     | 31.825   | 20.625  | 0.351924588 | 0.1891   | 2.831  |
| 95772_r_at | 3      | 3.3    | 14.3   | 4.2    | 2.2    | 30.7   | 14.9   | 17.3    | 0.188705608 | 6.2      | 16.275   | 10.075  | 0.380952381 | 0.253    | 2.341  |
| 95773_at   | 79.1   | 5.9    | 12.9   | 28.5   | 33.4   | 56.6   | 7.6    | 56.6    | 0.744191068 | 31.6     | 38.55    | 6.95    | 0.819714656 | 0.6128   | 1.475  |
| 95775_f_at | 43     | 48.9   | 47.5   | 84.6   | 110.1  | 81.2   | 108.4  | 59.9    | 0.071706112 | 56       | 89.9     | 33.9    | 0.622914349 | 0.06119  | 1.619  |
| 95781_at   | 244.3  | 148.5  | 131.3  | 192.6  | 155.6  | 258.1  | 195.8  | 157.3   | 0.731573435 | 179.175  | 191.7    | 12.525  | 0.934663537 | 0.6968   | 1.077  |
| 95782_at   | 165.9  | 137.3  | 127.5  | 142.5  | 122.1  | 213.6  | 121.8  | 156.3   | 0.684092008 | 143.3    | 153.45   | 10.15   | 0.933854676 | 0.762    | 1.047  |
| 95783_g_at | 83.5   | 23.1   | 48.6   | 81.5   | 30.6   | 53.7   | 56.6   | 73.9    | 0.759976625 | 59.175   | 53.7     | 5.475   | 1.101955307 | 0.9432   | 1.027  |
| 95784_at   | 26.8   | 9.5    | 28.3   | 31.7   | 29.6   | 31.2   | 4.2    | 22.9    | 0.800581833 | 24.075   | 21.975   | 2.1     | 1.09556314  | 0.6834   | -1.266 |
| 95785_s_at | 1057.2 | 776.4  | 1189.9 | 902.2  | 482.5  | 1029.8 | 1301   | 927.6   | 0.820858053 | 981.425  | 935.225  | 46.2    | 1.049399877 | 0.6926   | -1.101 |
| 95786_at   | 16.3   | 11     | 11.3   | 8.2    | 7      | 8.5    | 10.8   | 8.3     | 0.172197888 | 11.7     | 8.65     | 3.05    | 1.352601156 | 0.1394   | -1.329 |
| 95787_s_at | 706.2  | 765.8  | 762.7  | 707.1  | 658.7  | 701.9  | 1030   | 740.2   | 0.617327753 | 735.45   | 782.7    | 47.25   | 0.939632043 | 0.6594   | 1.048  |
| 95791_s_at | 2099.2 | 1954   | 2960.7 | 3049.4 | 1816.7 | 1746.4 | 2801.4 | 2824.4  | 0.614915431 | 2515.825 | 2297.225 | 218.6   | 1.095158289 | 0.599    | -1.102 |
| 95792_at   | 7.9    | 5.6    | 20.9   | 2.8    | 3.6    | 33.5   | 3.6    | 5.2     | 0.806146447 | 9.3      | 11.475   | 2.175   | 0.810457516 | 0.9572   | -1.039 |
| 95793_at   | 100.1  | 73.4   | 40.9   | 39.3   | 96.5   | 117.5  | 33.6   | 101.1   | 0.352456323 | 63.425   | 87.175   | 23.75   | 0.727559507 | 0.4508   | 1.344  |
| 95794_f_at | 594.7  | 589.2  | 677.3  | 637.4  | 545.8  | 683.2  | 579    | 589     | 0.509338414 | 624.65   | 599.25   | 25.4    | 1.042386316 | 0.4812   | -1.044 |
| 95795_at   | 684.4  | 827.3  | 675.9  | 827.3  | 904.3  | 716    | 654.8  | 732.6   | 0.979876181 | 753.725  | 751.925  | 1.8     | 1.002393856 | 0.9585   | 1.005  |
| 95796_g_at | 2467.9 | 3160.1 | 2171.3 | 2212.3 | 2966.2 | 2385.6 | 1874.4 | 2197.9  | 0.666005816 | 2502.9   | 2356.025 | 146.875 | 1.06234017  | 0.6435   | -1.065 |



|            |       |       |       |       |       |       |       |       |             |         |         |        |             |         |        |
|------------|-------|-------|-------|-------|-------|-------|-------|-------|-------------|---------|---------|--------|-------------|---------|--------|
| 95797_f_at | 16.8  | 10.8  | 6.8   | 11.7  | 32.5  | 68.9  | 11    | 36.7  | 0.118697212 | 11.525  | 37.275  | 25.75  | 0.309188464 | 0.05031 | 2.818  |
| 95798_f_at | 48.7  | 10.1  | 8.1   | 29    | 14.8  | 15.8  | 7.4   | 22.9  | 0.435513985 | 23.975  | 15.225  | 8.75   | 1.574712644 | 0.604   | -1.305 |
| 95799_s_at | 7.5   | 9.4   | 6.1   | 8     | 4.9   | 7.7   | 9.9   | 6.5   | 0.706204989 | 7.75    | 7.25    | 0.5    | 1.068965517 | 0.6402  | -1.09  |
| 95800_s_at | 70.2  | 43.6  | 90.3  | 98.8  | 30.1  | 77.4  | 164.5 | 84.9  | 0.679817192 | 75.725  | 89.225  | 13.5   | 0.848697114 | 0.9143  | 1.045  |
| 95801_s_at | 250.6 | 284.5 | 475.2 | 364.7 | 236.5 | 340.1 | 560.6 | 493.9 | 0.501465198 | 343.75  | 407.775 | 64.025 | 0.842989394 | 0.5636  | 1.159  |
| 95803_at   | 45.3  | 38.2  | 70.1  | 83    | 34.1  | 78    | 94.9  | 83.7  | 0.457163187 | 59.15   | 72.675  | 13.525 | 0.813897489 | 0.5541  | 1.203  |
| 95804_g_at | 35.9  | 33.7  | 167.6 | 62    | 24.2  | 42.4  | 95.2  | 92.7  | 0.771332501 | 74.8    | 63.625  | 11.175 | 1.175638507 | 0.8739  | -1.086 |
| 95805_at   | 512.5 | 598.9 | 348.2 | 410   | 449.8 | 496   | 443   | 495.1 | 0.953669683 | 467.4   | 470.975 | 3.575  | 0.992409364 | 0.8308  | 1.028  |
| 95806_f_at | 242.4 | 324.7 | 185.1 | 201.6 | 126.4 | 278.8 | 171   | 192.9 | 0.341094566 | 238.45  | 192.275 | 46.175 | 1.240150826 | 0.3023  | -1.261 |
| 95807_at   | 278   | 296.6 | 325.4 | 256   | 321.1 | 422.4 | 483.7 | 339.8 | 0.065892946 | 289     | 391.75  | 102.75 | 0.73771538  | 0.03449 | 1.342  |
| 95808_g_at | 21.3  | 15.5  | 9.1   | 12    | 9.3   | 12.2  | 9.4   | 6.1   | 0.141681104 | 14.475  | 9.25    | 5.225  | 1.564864865 | 0.1136  | -1.534 |
| 95848_at   | 357.5 | 257.4 | 576.2 | 420.7 | 326   | 424.7 | 763.2 | 487.2 | 0.433486512 | 402.95  | 500.275 | 97.325 | 0.805456999 | 0.4254  | 1.233  |
| 95852_at   | 63.2  | 39.2  | 46.7  | 26.6  | 33.6  | 19.4  | 59.7  | 14.5  | 0.379348342 | 43.925  | 31.8    | 12.125 | 1.381289308 | 0.2835  | -1.529 |
| 95853_at   | 4.6   | 2.2   | 1.5   | 2     | 8.5   | 3.4   | 2.2   | 1.4   | 0.495369826 | 2.575   | 3.875   | 1.3    | 0.664516129 | 0.5751  | 1.307  |
| 95854_at   | 27.2  | 10.4  | 17.6  | 3.1   | 29.7  | 54.3  | 17.3  | 19.2  | 0.179319463 | 14.575  | 30.125  | 15.55  | 0.483817427 | 0.1495  | 2.421  |
| 95855_at   | 50.3  | 33    | 27.4  | 39.5  | 27.8  | 46.6  | 40.9  | 33.5  | 0.958327964 | 37.55   | 37.2    | 0.35   | 1.009408602 | 0.9855  | 1.003  |
| 95856_at   | 14.1  | 1.5   | 1.4   | 3.6   | 6.2   | 25.8  | 12    | 14.9  | 0.114099511 | 5.15    | 14.725  | 9.575  | 0.349745331 | 0.06241 | 4.065  |
| 95857_at   | 24.6  | 32.1  | 22    | 33.5  | 36.2  | 16.5  | 15.3  | 36.3  | 0.775906714 | 28.05   | 26.075  | 1.975  | 1.075743049 | 0.607   | -1.151 |
| 95858_at   | 51    | 35.9  | 41.4  | 48.4  | 43.6  | 60.1  | 63.4  | 43.5  | 0.235347863 | 44.175  | 52.65   | 8.475  | 0.839031339 | 0.2338  | 1.185  |
| 95861_at   | 113.1 | 81.3  | 54.4  | 105.8 | 86.7  | 114.2 | 89.6  | 73.3  | 0.889742277 | 88.65   | 90.95   | 2.3    | 0.97471138  | 0.7969  | 1.052  |
| 95862_at   | 132.1 | 97.6  | 79.7  | 139.3 | 77.5  | 134.1 | 84.4  | 127.2 | 0.763494081 | 112.175 | 105.8   | 6.375  | 1.060255198 | 0.7554  | -1.065 |
| 95863_at   | 41.4  | 60.4  | 72.4  | 79    | 54.9  | 32.2  | 41.5  | 43.6  | 0.088763587 | 63.3    | 43.05   | 20.25  | 1.470383275 | 0.08295 | -1.454 |
| 95864_at   | 5.9   | 8.4   | 7.6   | 5.7   | 17.9  | 5.5   | 1.8   | 12.1  | 0.548558079 | 6.9     | 9.325   | 2.425  | 0.739946381 | 0.9988  | 1.001  |
| 95869_at   | 39.3  | 5.5   | 15.2  | 41.5  | 16.2  | 27.2  | 44.8  | 34.9  | 0.636236115 | 25.375  | 30.775  | 5.4    | 0.8245329   | 0.469   | 1.499  |
| 95870_at   | 5.3   | 4.1   | 13.4  | 28.1  | 2.9   | 8.5   | 30.5  | 23.8  | 0.678498935 | 12.725  | 16.425  | 3.7    | 0.774733638 | 0.7942  | 1.21   |
| 95871_at   | 6.5   | 17.7  | 11.8  | 10.1  | 11.3  | 28.8  | 10.6  | 6.1   | 0.651876919 | 11.525  | 14.2    | 2.675  | 0.811619718 | 0.7931  | 1.111  |
| 95872_at   | 110.3 | 95.2  | 96.1  | 119.6 | 102.1 | 132.5 | 138.8 | 140.9 | 0.081033398 | 105.3   | 128.575 | 23.275 | 0.818977251 | 0.08099 | 1.217  |
| 95875_at   | 141.8 | 68.1  | 85.4  | 86.3  | 104   | 147.6 | 102.1 | 92.6  | 0.455349462 | 95.4    | 111.575 | 16.175 | 0.855030249 | 0.3741  | 1.195  |
| 95876_at   | 169.1 | 103.1 | 155.4 | 120.1 | 207.6 | 160.9 | 177.4 | 171.6 | 0.066036188 | 136.925 | 179.375 | 42.45  | 0.763344948 | 0.06527 | 1.329  |
| 95877_at   | 79.8  | 70    | 66.1  | 47.1  | 67.3  | 65.8  | 40    | 56.3  | 0.401054912 | 65.75   | 57.35   | 8.4    | 1.14646905  | 0.4308  | -1.149 |
| 95878_at   | 2.9   | 3.5   | 11.7  | 6.7   | 2.5   | 26    | 2.2   | 5.9   | 0.651726678 | 6.2     | 9.15    | 2.95   | 0.677595628 | 0.9702  | 1.026  |
| 95879_at   | 65.2  | 80.8  | 53.9  | 103.7 | 66.2  | 55.6  | 123.5 | 135   | 0.440096423 | 75.9    | 95.075  | 19.175 | 0.798317118 | 0.5116  | 1.201  |
| 95880_s_at | 18.9  | 82.1  | 29    | 90.8  | 30.9  | 74.7  | 8.8   | 60.9  | 0.646372672 | 55.2    | 43.825  | 11.375 | 1.259555048 | 0.6465  | -1.348 |
| 95881_f_at | 129.4 | 123.2 | 83.7  | 128.7 | 176.7 | 129.2 | 133   | 137.9 | 0.121362682 | 116.25  | 144.2   | 27.95  | 0.806171983 | 0.1298  | 1.25   |
| 95882_at   | 4.9   | 10.1  | 15.8  | 16.3  | 5     | 6.1   | 5     | 6.8   | 0.108424147 | 11.775  | 5.725   | 6.05   | 2.056768559 | 0.0714  | -1.877 |
| 95883_at   | 209.7 | 208.7 | 256.6 | 265.4 | 137.6 | 159.9 | 219.6 | 179.4 | 0.038788742 | 235.1   | 174.125 | 60.975 | 1.350179469 | 0.03927 | -1.362 |
| 95884_at   | 10.8  | 24.5  | 18.2  | 10.8  | 38.9  | 8.3   | 17.9  | 35.8  | 0.314525024 | 16.075  | 25.225  | 9.15   | 0.637264618 | 0.4343  | 1.413  |
| 95885_at   | 245.1 | 209.9 | 287.1 | 260.8 | 229   | 228.7 | 317   | 318.7 | 0.4890792   | 250.725 | 273.35  | 22.625 | 0.917230657 | 0.5175  | 1.083  |
| 95886_g_at | 548.6 | 509   | 531.2 | 639.8 | 593.6 | 353.6 | 506   | 623.6 | 0.599674158 | 557.15  | 519.2   | 37.95  | 1.07309322  | 0.5379  | -1.094 |
| 95887_at   | 51    | 66.6  | 90.2  | 80.8  | 96.6  | 51.6  | 83.7  | 79.3  | 0.67373415  | 72.15   | 77.8    | 5.65   | 0.927377892 | 0.7061  | 1.075  |
| 95888_at   | 22.4  | 26    | 19.8  | 24.6  | 5     | 11.9  | 47.4  | 33.9  | 0.899774593 | 23.2    | 24.55   | 1.35   | 0.945010183 | 0.6153  | -1.315 |
| 95889_at   | 282.8 | 263.8 | 387.4 | 427.4 | 274.9 | 343.4 | 366.8 | 374.9 | 0.994209388 | 340.35  | 340     | 0.35   | 1.001029412 | 0.9308  | 1.013  |
| 95890_r_at | 17.5  | 7.2   | 5.5   | 3.8   | 2.1   | 22.4  | 11.2  | 11.6  | 0.545771286 | 8.5     | 11.825  | 3.325  | 0.718816068 | 0.7441  | 1.229  |
| 95891_at   | 115.7 | 92    | 71.6  | 105.5 | 116.5 | 147.5 | 119.8 | 105.6 | 0.092129403 | 96.2    | 122.35  | 26.15  | 0.786268901 | 0.09536 | 1.282  |
| 95892_at   | 20.1  | 15.7  | 17.3  | 11.9  | 2.7   | 24.6  | 16.3  | 4.8   | 0.4891933   | 16.25   | 12.1    | 4.15   | 1.342975207 | 0.2764  | -1.885 |
| 95893_at   | 90.9  | 81.5  | 54.3  | 69.9  | 57.2  | 107.2 | 52.2  | 52    | 0.672034929 | 74.15   | 67.15   | 7      | 1.104244229 | 0.5496  | -1.14  |
| 95894_at   | 88.3  | 68.1  | 63.1  | 108.9 | 74.8  | 37.1  | 85.5  | 91.4  | 0.560932086 | 82.1    | 72.2    | 9.9    | 1.137119114 | 0.5307  | -1.175 |
| 95895_at   | 49.6  | 36.5  | 43.3  | 28.9  | 62.6  | 56.3  | 68    | 41.2  | 0.056854684 | 39.575  | 57.025  | 17.45  | 0.693993862 | 0.06102 | 1.444  |
| 95896_at   | 102.7 | 99.4  | 97.7  | 164.6 | 188.2 | 167.7 | 176.3 | 161.3 | 0.032004073 | 116.1   | 173.375 | 57.275 | 0.66964672  | 0.01687 | 1.529  |
| 95897_at   | 295   | 439.1 | 571.6 | 514.2 | 518.2 | 587.1 | 710.7 | 738.3 | 0.06041629  | 454.975 | 638.575 | 183.6  | 0.71248483  | 0.07574 | 1.431  |
| 95898_at   | 33.4  | 24.1  | 24.6  | 32.3  | 23.8  | 28.7  | 29.3  | 31.8  | 0.948967108 | 28.6    | 28.4    | 0.2    | 1.007042254 | 0.9906  | 1.001  |
| 95901_f_at | 54.1  | 43.1  | 35.7  | 35.9  | 40    | 56.7  | 45.5  | 60.1  | 0.238321404 | 42.2    | 50.575  | 8.375  | 0.83440435  | 0.2303  | 1.2    |
| 95902_at   | 199.5 | 99.6  | 156   | 194.9 | 84.4  | 183.2 | 165.2 | 127.7 | 0.508564292 | 162.5   | 140.125 | 22.375 | 1.159678858 | 0.5383  | -1.167 |
| 95903_at   | 80    | 92.9  | 86    | 83.5  | 70.6  | 83.1  | 97.2  | 71.7  | 0.504184941 | 85.6    | 80.65   | 4.95   | 1.061376317 | 0.4426  | -1.069 |
| 95904_at   | 182.4 | 80.9  | 99.4  | 94.1  | 83.7  | 162.5 | 128   | 79.7  | 0.981711717 | 114.2   | 113.475 | 0.725  | 1.006389072 | 0.9963  | 1.001  |
| 95905_at   | 73.1  | 49.3  | 45.6  | 66.6  | 70.9  | 71.9  | 36.3  | 33.6  | 0.678458084 | 58.65   | 53.175  | 5.475  | 1.102961918 | 0.5718  | -1.152 |



|            |       |       |       |        |       |       |       |       |             |         |         |        |             |          |        |
|------------|-------|-------|-------|--------|-------|-------|-------|-------|-------------|---------|---------|--------|-------------|----------|--------|
| 95906_at   | 60.9  | 41.1  | 60.1  | 54     | 34.7  | 64.6  | 74.5  | 71.2  | 0.513192715 | 54.025  | 61.25   | 7.225  | 0.882040816 | 0.6502   | 1.1    |
| 95907_at   | 158.5 | 213.2 | 163.4 | 142.4  | 191.2 | 246   | 177   | 214.2 | 0.129228547 | 169.375 | 207.1   | 37.725 | 0.817841622 | 0.1162   | 1.228  |
| 95908_at   | 9.9   | 20.7  | 9     | 12.1   | 15.2  | 21.5  | 4     | 3.6   | 0.733855831 | 12.925  | 11.075  | 1.85   | 1.167042889 | 0.4598   | -1.476 |
| 95909_at   | 13.5  | 6.6   | 12.4  | 7.3    | 11.7  | 10.4  | 17.8  | 8.1   | 0.479296272 | 9.95    | 12      | 2.05   | 0.829166667 | 0.4506   | 1.219  |
| 95910_f_at | 586   | 561.6 | 504.1 | 421.4  | 567.8 | 482   | 439.5 | 487.2 | 0.615014761 | 518.275 | 494.125 | 24.15  | 1.048874273 | 0.6438   | -1.045 |
| 95911_at   | 32.7  | 21.5  | 37.7  | 41.6   | 32.4  | 28.2  | 38.8  | 39.7  | 0.796181065 | 33.375  | 34.775  | 1.4    | 0.959741193 | 0.7262   | 1.063  |
| 95912_at   | 175.4 | 148.5 | 146.8 | 121.1  | 50.9  | 151.8 | 134.3 | 110.8 | 0.211238743 | 147.95  | 111.95  | 36     | 1.32157213  | 0.2242   | -1.416 |
| 95913_at   | 129.7 | 126.1 | 131   | 151.7  | 180.1 | 126.5 | 167.3 | 209.3 | 0.123059361 | 134.625 | 170.8   | 36.175 | 0.788202576 | 0.09517  | 1.252  |
| 95914_at   | 160.7 | 203.2 | 309.8 | 251.8  | 208   | 153.7 | 325.3 | 292.7 | 0.798361269 | 231.375 | 244.925 | 13.55  | 0.944676942 | 0.8467   | 1.046  |
| 95915_at   | 163.9 | 82.1  | 121.2 | 154.9  | 78.3  | 116.9 | 191.6 | 123.1 | 0.922512649 | 130.525 | 127.475 | 3.05   | 1.02392626  | 0.876    | -1.04  |
| 95916_at   | 47.9  | 8.9   | 45.6  | 73.2   | 23.8  | 33.8  | 31.6  | 62.2  | 0.71515246  | 43.9    | 37.85   | 6.05   | 1.15984148  | 0.9611   | 1.026  |
| 95917_at   | 25.4  | 4.2   | 6.4   | 29.6   | 28.3  | 28.7  | 55.7  | 70.4  | 0.061834065 | 16.4    | 45.775  | 29.375 | 0.358274167 | 0.05804  | 3.543  |
| 95919_at   | 13.9  | 11.9  | 9.1   | 8.8    | 9.4   | 12.8  | 7.1   | 8.3   | 0.410691374 | 10.925  | 9.4     | 1.525  | 1.162234043 | 0.385    | -1.168 |
| 95920_at   | 53.2  | 8     | 21.3  | 16.3   | 31.2  | 50.3  | 15    | 53.9  | 0.372886561 | 24.7    | 37.6    | 12.9   | 0.656914894 | 0.3163   | 1.708  |
| 95923_at   | 46.3  | 51.9  | 60.3  | 59.5   | 77.8  | 67.5  | 46.9  | 55    | 0.385884998 | 54.5    | 61.8    | 7.3    | 0.881877023 | 0.4101   | 1.12   |
| 95924_at   | 198.5 | 175.4 | 140.5 | 212.7  | 119.1 | 228.5 | 148.3 | 168.8 | 0.60016896  | 181.775 | 166.175 | 15.6   | 1.093876937 | 0.5424   | -1.112 |
| 95925_at   | 7.5   | 7     | 17.6  | 8.7    | 21.9  | 26.8  | 38.7  | 7.2   | 0.128861623 | 10.2    | 23.65   | 13.45  | 0.431289641 | 0.1235   | 2.119  |
| 95926_at   | 61.3  | 23.6  | 34.7  | 40.7   | 7.5   | 58.5  | 28.6  | 36.9  | 0.606201705 | 40.075  | 32.875  | 7.2    | 1.219011407 | 0.4711   | -1.45  |
| 95927_f_at | 205.7 | 248.6 | 237.1 | 175.7  | 306.5 | 313.8 | 282.3 | 233.9 | 0.033132062 | 216.775 | 284.125 | 67.35  | 0.762956445 | 0.03759  | 1.314  |
| 95929_at   | 109.2 | 72.2  | 71    | 53.6   | 67.3  | 99.6  | 105.5 | 87.4  | 0.390511693 | 76.5    | 89.95   | 13.45  | 0.850472485 | 0.3487   | 1.198  |
| 95930_at   | 16.1  | 24.5  | 11.9  | 8.2    | 22.3  | 17.2  | 5.9   | 7.6   | 0.726553449 | 15.175  | 13.25   | 1.925  | 1.145283019 | 0.6267   | -1.224 |
| 95931_at   | 92.5  | 54.5  | 52.1  | 66.5   | 67.6  | 58    | 34.5  | 36.8  | 0.212667639 | 66.4    | 49.225  | 17.175 | 1.348908075 | 0.1881   | -1.368 |
| 95932_at   | 95.9  | 29.1  | 53.6  | 43.6   | 58.8  | 65.6  | 33.7  | 62    | 0.975376183 | 55.55   | 55.025  | 0.525  | 1.009541118 | 0.8634   | 1.054  |
| 95933_f_at | 299   | 256   | 214.4 | 251.6  | 155.1 | 123.6 | 126.9 | 200.6 | 0.005857577 | 255.25  | 151.55  | 103.7  | 1.68426262  | 0.006581 | -1.705 |
| 95934_at   | 4.3   | 1.9   | 4.4   | 14.7   | 2.4   | 5.3   | 10.1  | 2.7   | 0.73560132  | 6.325   | 5.125   | 1.2    | 1.234146341 | 0.8426   | -1.118 |
| 95935_at   | 18.6  | 15.2  | 15.1  | 12.2   | 11    | 15.8  | 15.4  | 8.4   | 0.284429146 | 15.275  | 12.65   | 2.625  | 1.207509881 | 0.271    | -1.233 |
| 95936_at   | 15.7  | 38.6  | 15.5  | 29.3   | 60.7  | 32    | 51.4  | 54.1  | 0.025289939 | 24.775  | 49.55   | 24.775 | 0.5         | 0.03259  | 2.102  |
| 95937_at   | 56.4  | 56.5  | 71.9  | 82.3   | 45.7  | 92.3  | 70.5  | 86.2  | 0.595417869 | 66.775  | 73.675  | 6.9    | 0.906345436 | 0.6915   | 1.08   |
| 95938_at   | 95.5  | 72.5  | 114.6 | 112.8  | 71.7  | 178.2 | 117.1 | 127   | 0.359296322 | 98.85   | 123.5   | 24.65  | 0.800404858 | 0.4168   | 1.207  |
| 95939_i_at | 119.6 | 130.4 | 122.6 | 175.7  | 106   | 115.2 | 93.3  | 104.3 | 0.084554251 | 137.075 | 104.7   | 32.375 | 1.30921681  | 0.03893  | -1.297 |
| 95940_f_at | 103.3 | 146.4 | 142.9 | 193.7  | 52.1  | 55.7  | 76.2  | 87.4  | 0.016438734 | 146.575 | 67.85   | 78.725 | 2.160280029 | 0.005078 | -2.157 |
| 95941_at   | 9.9   | 16.9  | 10.4  | 22.5   | 14.8  | 22.9  | 18.5  | 22.6  | 0.235008777 | 14.925  | 19.7    | 4.775  | 0.757614213 | 0.2005   | 1.378  |
| 95943_at   | 13.6  | 21.7  | 11.9  | 69.2   | 12.6  | 14.1  | 25.9  | 18.3  | 0.467095989 | 29.1    | 17.725  | 11.375 | 1.641748942 | 0.5601   | -1.304 |
| 95944_at   | 470.9 | 460.9 | 440.5 | 1117.1 | 477.6 | 525   | 929.8 | 984.2 | 0.632511398 | 622.35  | 729.15  | 106.8  | 0.853528081 | 0.5375   | 1.211  |
| 95945_at   | 8.1   | 22.8  | 3     | 13.3   | 15.4  | 20.1  | 5.7   | 3.9   | 0.930068028 | 11.8    | 11.275  | 0.525  | 1.046563193 | 0.9758   | 1.019  |
| 95946_at   | 33.9  | 32.1  | 39.2  | 9.3    | 20.2  | 68.8  | 23.3  | 30.9  | 0.606264529 | 28.625  | 35.8    | 7.175  | 0.799581006 | 0.6114   | 1.26   |
| 95947_at   | 1.2   | 1.8   | 0.8   | 2      | 2     | 3.1   | 1     | 1.6   | 0.403576676 | 1.45    | 1.925   | 0.475  | 0.753246753 | 0.4648   | 1.276  |
| 95948_at   | 116   | 90.2  | 44.8  | 54.9   | 71.6  | 141.5 | 82    | 56.3  | 0.663105796 | 76.475  | 87.85   | 11.375 | 0.870517928 | 0.6288   | 1.161  |
| 95949_at   | 90.5  | 92.3  | 43.9  | 58.2   | 74.6  | 86.7  | 68.5  | 58    | 0.959296366 | 71.225  | 71.95   | 0.725  | 0.989923558 | 0.8232   | 1.047  |
| 95950_at   | 11.8  | 14.3  | 6.9   | 11.8   | 8.5   | 17.5  | 17.4  | 3.4   | 0.901682912 | 11.2    | 11.7    | 0.5    | 0.957264957 | 0.793    | -1.122 |
| 95951_at   | 64.4  | 125   | 56.9  | 113.9  | 112.8 | 146.8 | 96.8  | 66.1  | 0.541033019 | 90.05   | 105.625 | 15.575 | 0.852544379 | 0.5204   | 1.194  |
| 95952_at   | 200.4 | 150.2 | 129.3 | 118.8  | 197.1 | 169.6 | 78.3  | 160.3 | 0.959898743 | 149.675 | 151.325 | 1.65   | 0.989096316 | 0.9213   | -1.025 |
| 95953_at   | 87.9  | 74.4  | 86    | 189.9  | 96    | 122.8 | 204.9 | 213.8 | 0.258605871 | 109.55  | 159.375 | 49.825 | 0.687372549 | 0.2213   | 1.483  |
| 95954_at   | 38    | 31.4  | 36.5  | 49.2   | 52.2  | 65.7  | 33    | 72.2  | 0.144448911 | 38.775  | 55.775  | 17     | 0.695203944 | 0.1418   | 1.397  |
| 95955_at   | 40.1  | 38.1  | 44    | 70.6   | 19.2  | 37.4  | 81.8  | 88.5  | 0.668008106 | 48.2    | 56.725  | 8.525  | 0.84971353  | 0.9552   | 1.023  |
| 95956_at   | 63.6  | 39.4  | 24.3  | 38.7   | 32.4  | 50.2  | 34.2  | 41.6  | 0.843935605 | 41.5    | 39.6    | 1.9    | 1.047979798 | 0.9852   | 1.004  |
| 95957_at   | 19.8  | 17.8  | 12    | 29.5   | 26.1  | 19.2  | 27.9  | 29.1  | 0.231945629 | 19.775  | 25.575  | 5.8    | 0.773216031 | 0.205    | 1.342  |
| 95958_at   | 39.7  | 21.2  | 5     | 28.8   | 5.8   | 29.3  | 31.3  | 18.9  | 0.810226186 | 23.675  | 21.325  | 2.35   | 1.110199297 | 0.9369   | -1.051 |
| 95959_at   | 42.1  | 23.9  | 4.2   | 8.5    | 7.1   | 14.9  | 46.8  | 25.4  | 0.7607869   | 19.675  | 23.55   | 3.875  | 0.835456476 | 0.6487   | 1.368  |
| 95960_at   | 6.4   | 26.2  | 14.9  | 23.5   | 18    | 45.3  | 27.3  | 33.5  | 0.120595735 | 17.75   | 31.025  | 13.275 | 0.572119259 | 0.1411   | 1.888  |
| 95961_at   | 109.7 | 38.2  | 14.8  | 26.5   | 84.1  | 30.5  | 21.3  | 26.8  | 0.807423575 | 47.3    | 40.675  | 6.625  | 1.16287646  | 0.9562   | -1.03  |
| 95962_at   | 28.1  | 43.1  | 24.9  | 48.1   | 36    | 36.8  | 55.8  | 62.1  | 0.231747543 | 36.05   | 47.675  | 11.625 | 0.75616151  | 0.2251   | 1.333  |
| 95963_at   | 151.4 | 132.1 | 132.1 | 236.3  | 84.2  | 113.6 | 227.9 | 173.4 | 0.756224901 | 162.975 | 149.775 | 13.2   | 1.088132198 | 0.6473   | -1.134 |
| 95964_at   | 58.8  | 81.9  | 41.6  | 96.5   | 63.9  | 77.8  | 91.8  | 127   | 0.305274867 | 69.7    | 90.125  | 20.425 | 0.773370319 | 0.2892   | 1.316  |
| 95965_at   | 10.3  | 11    | 5.8   | 7.1    | 5.8   | 8.1   | 38.6  | 10.5  | 0.419746741 | 8.55    | 15.75   | 7.2    | 0.542857143 | 0.4586   | 1.42   |
| 95966_at   | 1.3   | 1.3   | 0.5   | 2.6    | 2     | 2.7   | 1.9   | 2.6   | 0.138128975 | 1.425   | 2.3     | 0.875  | 0.619565217 | 0.1255   | 1.86   |



|            |        |        |        |        |        |        |        |        |             |          |          |         |             |         |        |
|------------|--------|--------|--------|--------|--------|--------|--------|--------|-------------|----------|----------|---------|-------------|---------|--------|
| 95967_at   | 10.3   | 9.1    | 12.5   | 7.9    | 6.7    | 37.8   | 8.5    | 6.8    | 0.560582278 | 9.95     | 14.95    | 5       | 0.665551839 | 0.7942  | 1.123  |
| 95968_at   | 7.4    | 6.9    | 24.8   | 36.7   | 32.3   | 29.5   | 4.4    | 25.4   | 0.69558302  | 18.95    | 22.9     | 3.95    | 0.827510917 | 0.7616  | 1.224  |
| 95970_at   | 7.9    | 8.2    | 5.2    | 8.7    | 6.5    | 31.2   | 7.5    | 7.5    | 0.416312297 | 7.5      | 13.175   | 5.675   | 0.569259962 | 0.4194  | 1.401  |
| 95971_at   | 82.9   | 50     | 41.1   | 31.8   | 47.2   | 68.1   | 56.8   | 44.8   | 0.83211979  | 51.45    | 54.225   | 2.775   | 0.948824343 | 0.6631  | 1.108  |
| 95972_at   | 23     | 62.3   | 14.5   | 18     | 15.8   | 19.2   | 19.8   | 12.6   | 0.339733638 | 29.45    | 16.85    | 12.6    | 1.747774481 | 0.281   | -1.492 |
| 95973_at   | 8.7    | 10     | 1.8    | 5.6    | 13.3   | 3      | 3.4    | 8.4    | 0.874990334 | 6.525    | 7.025    | 0.5     | 0.928825623 | 0.8973  | 1.075  |
| 95974_at   | 3.9    | 2.6    | 2.4    | 2.9    | 1.6    | 3      | 4      | 2.3    | 0.727270125 | 2.95     | 2.725    | 0.225   | 1.082568807 | 0.618   | -1.124 |
| 95975_at   | 26.1   | 5.5    | 15.7   | 22.6   | 16.8   | 24.4   | 17.2   | 13.1   | 0.941035791 | 17.475   | 17.875   | 0.4     | 0.977622378 | 0.7065  | 1.16   |
| 95976_at   | 13.9   | 5.7    | 3.9    | 6.9    | 5.1    | 8.7    | 7.9    | 5.2    | 0.731142997 | 7.6      | 6.725    | 0.875   | 1.130111524 | 0.8946  | -1.043 |
| 95977_at   | 7.6    | 2.7    | 4      | 6.5    | 3.6    | 5.2    | 3.2    | 4.3    | 0.404983427 | 5.2      | 4.075    | 1.125   | 1.27607362  | 0.5105  | -1.199 |
| 95978_at   | 105.9  | 60.8   | 120.8  | 95.4   | 87.3   | 112.1  | 108    | 71.4   | 0.950828275 | 95.725   | 94.7     | 1.025   | 1.010823654 | 0.984   | 1.004  |
| 95979_at   | 5.9    | 9.3    | 6.8    | 25.7   | 11.5   | 27.3   | 31.4   | 26.3   | 0.103996097 | 11.925   | 24.125   | 12.2    | 0.494300518 | 0.08734 | 2.281  |
| 95980_at   | 42.1   | 12.6   | 7      | 38.8   | 35.8   | 48.6   | 27.3   | 24.9   | 0.427024184 | 25.125   | 34.15    | 9.025   | 0.735724744 | 0.2997  | 1.694  |
| 95981_at   | 103.4  | 82.1   | 73.8   | 75.9   | 100.6  | 105.1  | 89.9   | 81.5   | 0.27170924  | 83.8     | 94.275   | 10.475  | 0.888888889 | 0.2494  | 1.129  |
| 95982_at   | 156.3  | 134.2  | 158.3  | 129    | 149    | 157.9  | 165.2  | 114.1  | 0.882881214 | 144.45   | 146.55   | 2.1     | 0.98567042  | 0.9324  | 1.009  |
| 95983_at   | 24.2   | 17.8   | 19.3   | 35.9   | 15     | 39.7   | 24.4   | 15.1   | 0.919886066 | 24.3     | 23.55    | 0.75    | 1.031847134 | 0.7914  | -1.081 |
| 95984_at   | 63.4   | 93.5   | 76.4   | 88.3   | 80.5   | 61.8   | 69.5   | 62.1   | 0.194814083 | 80.4     | 68.475   | 11.925  | 1.17415115  | 0.1936  | -1.169 |
| 95985_at   | 12     | 9.8    | 9.9    | 10.1   | 6.2    | 12.2   | 9.1    | 7.9    | 0.307329174 | 10.45    | 8.85     | 1.6     | 1.18079096  | 0.241   | -1.215 |
| 95986_at   | 183.1  | 194.1  | 184.4  | 245.2  | 216.5  | 304.7  | 232.7  | 172.3  | 0.386454309 | 201.7    | 231.55   | 29.85   | 0.871086158 | 0.3954  | 1.133  |
| 95987_at   | 47.6   | 13.3   | 32.3   | 15.4   | 48     | 41.4   | 27.9   | 20.4   | 0.503724625 | 27.15    | 34.425   | 7.275   | 0.788671024 | 0.4086  | 1.376  |
| 95988_r_at | 4.3    | 1.2    | 1.5    | 1.2    | 7.7    | 9.7    | 1.3    | 2.3    | 0.219288236 | 2.05     | 5.25     | 3.2     | 0.39047619  | 0.2066  | 2.225  |
| 95989_at   | 98.2   | 72     | 48.3   | 62.7   | 50.2   | 134.6  | 71.2   | 71.9   | 0.604123473 | 70.3     | 81.975   | 11.675  | 0.85757853  | 0.6525  | 1.127  |
| 95990_at   | 22.5   | 15     | 8.9    | 11.4   | 8.5    | 27.9   | 10.1   | 12.2   | 0.968104366 | 14.45    | 14.675   | 0.225   | 0.984667802 | 0.9121  | -1.039 |
| 95991_at   | 27.9   | 10.7   | 7.5    | 8.4    | 12.5   | 26     | 26.3   | 23.9   | 0.198154624 | 13.625   | 22.175   | 8.55    | 0.614430665 | 0.1373  | 1.813  |
| 95992_at   | 68     | 22.4   | 35.3   | 89.6   | 11.6   | 72.6   | 79.4   | 13.6   | 0.7044962   | 53.825   | 44.3     | 9.525   | 1.215011287 | 0.5179  | -1.518 |
| 95994_at   | 61.9   | 64.7   | 48.3   | 58.9   | 57.7   | 71.3   | 56.1   | 57.3   | 0.686194225 | 58.45    | 60.6     | 2.15    | 0.964521452 | 0.6823  | 1.037  |
| 95995_at   | 11.4   | 12.8   | 5.9    | 18.9   | 6.3    | 11.3   | 38.7   | 6.3    | 0.701965883 | 12.25    | 15.65    | 3.4     | 0.782747604 | 0.9708  | 1.019  |
| 95996_at   | 35.8   | 20     | 21.9   | 10.5   | 20.6   | 44.7   | 33.2   | 24.4   | 0.289985415 | 22.05    | 30.725   | 8.675   | 0.717656631 | 0.2632  | 1.456  |
| 95997_at   | 15.5   | 18     | 9.4    | 14.7   | 15.3   | 14.2   | 11.7   | 13.2   | 0.704404027 | 14.4     | 13.6     | 0.8     | 1.058823529 | 0.8252  | -1.036 |
| 95998_at   | 64.3   | 22.3   | 25.3   | 33.4   | 45.3   | 63.3   | 42.4   | 40.8   | 0.34001015  | 36.325   | 47.95    | 11.625  | 0.757559958 | 0.2187  | 1.422  |
| 95999_at   | 12.4   | 29.2   | 20.8   | 14.5   | 12.2   | 12.9   | 8.5    | 13.4   | 0.139960546 | 19.225   | 11.75    | 7.475   | 1.636170213 | 0.08297 | -1.572 |
| 96000_at   | 11.6   | 8.5    | 6.8    | 5.4    | 6.1    | 11.4   | 8.7    | 10.3   | 0.573564099 | 8.075    | 9.125    | 1.05    | 0.884931507 | 0.5573  | 1.141  |
| 96001_at   | 1054.2 | 906.8  | 874.1  | 894.1  | 770.8  | 1170.6 | 903.7  | 742.5  | 0.755247956 | 932.3    | 896.9    | 35.4    | 1.039469283 | 0.655   | -1.054 |
| 96002_at   | 514.2  | 463.9  | 579.6  | 550.3  | 527.8  | 533.4  | 702.1  | 554.8  | 0.326311584 | 527      | 579.525  | 52.525  | 0.909365429 | 0.3108  | 1.096  |
| 96003_at   | 642.2  | 818.7  | 795.3  | 964.7  | 816.1  | 503.9  | 824.3  | 848.2  | 0.607104378 | 805.225  | 748.125  | 57.1    | 1.076324144 | 0.5937  | -1.088 |
| 96004_at   | 930.9  | 791.1  | 895.6  | 912.2  | 907.5  | 1067.1 | 886.4  | 1071.4 | 0.147850163 | 882.45   | 983.1    | 100.65  | 0.897619774 | 0.1422  | 1.112  |
| 96007_at   | 7620.5 | 6845   | 5905.9 | 5633.3 | 6332.7 | 7364.1 | 7015.5 | 6852.9 | 0.478335739 | 6501.175 | 6891.3   | 390.125 | 0.943388766 | 0.4318  | 1.066  |
| 96008_at   | 6432.4 | 5685.9 | 5094   | 4314   | 5094.7 | 5713.7 | 4826.2 | 4836.6 | 0.620801788 | 5381.575 | 5117.8   | 263.775 | 1.051540701 | 0.6692  | -1.043 |
| 96009_s_at | 174.4  | 136    | 108.7  | 123.8  | 81.2   | 118.5  | 94.7   | 154.7  | 0.315368247 | 135.725  | 112.275  | 23.45   | 1.208862169 | 0.2801  | -1.227 |
| 96010_at   | 1728.6 | 1582.9 | 1825.4 | 1532.6 | 1837.2 | 2039.6 | 1833.4 | 1583.7 | 0.227943836 | 1667.375 | 1823.475 | 156.1   | 0.91439422  | 0.2292  | 1.092  |
| 96011_at   | 1022.6 | 1040.6 | 1334.6 | 1332.4 | 970.1  | 1221.7 | 1677.3 | 1332.3 | 0.521542901 | 1182.55  | 1300.35  | 117.8   | 0.909409005 | 0.5576  | 1.088  |
| 96012_f_at | 6933.9 | 7471   | 6244   | 7102.6 | 7705.7 | 7445.8 | 8114.1 | 8215.1 | 0.028435967 | 6937.875 | 7870.175 | 932.3   | 0.881540118 | 0.02785 | 1.136  |
| 96013_r_at | 149.3  | 135.8  | 195.1  | 284.7  | 259.4  | 223.5  | 220.7  | 267.5  | 0.227035048 | 191.225  | 242.775  | 51.55   | 0.787663474 | 0.1596  | 1.32   |
| 96014_at   | 1006.9 | 992.6  | 801.5  | 789.8  | 1054.2 | 1210.5 | 870.5  | 835.8  | 0.405238203 | 897.7    | 992.75   | 95.05   | 0.904255855 | 0.4114  | 1.101  |
| 96016_at   | 5736.9 | 5144.6 | 3870.2 | 3519.7 | 4662.4 | 5257.2 | 3498.5 | 3403.2 | 0.61941699  | 4567.85  | 4205.325 | 362.525 | 1.086206179 | 0.6293  | -1.083 |
| 96017_at   | 2433.2 | 2090.7 | 1615.3 | 1497.6 | 1751   | 1999.8 | 1580   | 1592.2 | 0.492934824 | 1909.2   | 1730.75  | 178.45  | 1.10310559  | 0.5297  | -1.087 |
| 96018_r_at | 244.4  | 261.4  | 320.6  | 307.2  | 263.6  | 329.7  | 238    | 230.8  | 0.560304197 | 283.4    | 265.525  | 17.875  | 1.067319461 | 0.5286  | -1.072 |
| 96019_at   | 1888.9 | 1690.4 | 2194.5 | 2154.7 | 1722.7 | 1841.9 | 2801.6 | 2594.4 | 0.42798965  | 1982.125 | 2240.15  | 258.025 | 0.884817981 | 0.4657  | 1.112  |
| 96020_at   | 374.4  | 517.7  | 351.6  | 279.5  | 485.3  | 447.8  | 539.7  | 412    | 0.177322898 | 380.8    | 471.2    | 90.4    | 0.808149406 | 0.1466  | 1.262  |
| 96021_at   | 1336.7 | 1322   | 1116.5 | 991.9  | 1177.8 | 1245.7 | 989.5  | 1093.4 | 0.54268188  | 1191.775 | 1126.6   | 65.175  | 1.057851056 | 0.5702  | -1.054 |
| 96023_at   | 137.5  | 117    | 164.7  | 134    | 125.9  | 117.1  | 117.8  | 107.3  | 0.11704081  | 138.3    | 117.025  | 21.275  | 1.181798761 | 0.08286 | -1.175 |
| 96024_at   | 3085.2 | 2819.3 | 2554   | 2637.1 | 2921.6 | 2850   | 2864.5 | 2824.6 | 0.497319972 | 2773.9   | 2865.175 | 91.275  | 0.968143307 | 0.4409  | 1.036  |
| 96025_g_at | 3691.5 | 4313.1 | 3535.4 | 3636.7 | 4436.5 | 3547.3 | 4032.5 | 4090.5 | 0.395095842 | 3794.175 | 4026.7   | 232.525 | 0.942254203 | 0.3913  | 1.061  |
| 96026_at   | 412    | 340.3  | 288.3  | 326.5  | 426.7  | 494.8  | 351.8  | 335.2  | 0.233078047 | 341.775  | 402.125  | 60.35   | 0.849922288 | 0.2216  | 1.172  |
| 96027_at   | 307.4  | 261.9  | 510    | 548.9  | 347.2  | 326.6  | 394.6  | 331.8  | 0.489408848 | 407.05   | 350.05   | 57      | 1.162833881 | 0.5997  | -1.11  |
| 96028_at   | 22.5   | 23.4   | 11.6   | 16.6   | 13.9   | 24.2   | 5.2    | 10.9   | 0.348619616 | 18.525   | 13.55    | 4.975   | 1.367158672 | 0.2881  | -1.519 |



|            |        |        |        |        |        |        |        |        |             |          |          |         |             |          |        |
|------------|--------|--------|--------|--------|--------|--------|--------|--------|-------------|----------|----------|---------|-------------|----------|--------|
| 96029_at   | 2517.3 | 2147.5 | 1935.3 | 1772.8 | 2089.5 | 1964.1 | 1880.8 | 1788.1 | 0.401654722 | 2093.225 | 1930.625 | 162.6   | 1.084221431 | 0.4037   | -1.077 |
| 96030_at   | 13.5   | 12.2   | 24.3   | 12     | 14.4   | 37.6   | 2.7    | 27.9   | 0.564807548 | 15.5     | 20.65    | 5.15    | 0.750605327 | 0.9459   | -1.044 |
| 96031_r_at | 148.9  | 109.4  | 109.5  | 156.5  | 123.3  | 151.2  | 122    | 173.5  | 0.540705567 | 131.075  | 142.5    | 11.425  | 0.919824561 | 0.527    | 1.09   |
| 96032_at   | 147.9  | 89.1   | 89.1   | 68     | 81.1   | 168.4  | 106    | 89.8   | 0.642273057 | 98.525   | 111.325  | 12.8    | 0.885021334 | 0.6139   | 1.13   |
| 96033_at   | 106.4  | 107.6  | 122.1  | 94.2   | 111.4  | 139.6  | 126.5  | 112.5  | 0.140816997 | 107.575  | 122.5    | 14.925  | 0.878163265 | 0.1353   | 1.139  |
| 96035_at   | 701.7  | 753.4  | 573.2  | 484.2  | 706.8  | 539.5  | 477.2  | 565.2  | 0.501729609 | 628.125  | 572.175  | 55.95   | 1.097784769 | 0.5185   | -1.093 |
| 96036_at   | 7.1    | 23.7   | 7.8    | 20.5   | 20.6   | 23.8   | 12.3   | 18     | 0.46606906  | 14.775   | 18.675   | 3.9     | 0.791164659 | 0.3535   | 1.415  |
| 96037_at   | 1791.5 | 2050.4 | 2325.1 | 1900.1 | 1747   | 1993.5 | 1266.9 | 1587   | 0.105940034 | 2016.775 | 1648.6   | 368.175 | 1.223325852 | 0.1069   | -1.234 |
| 96038_at   | 538.5  | 878.5  | 829.9  | 787.7  | 1116.6 | 807.7  | 1173.8 | 960.7  | 0.062375917 | 758.65   | 1014.7   | 256.05  | 0.747659407 | 0.07627  | 1.347  |
| 96041_at   | 6584.6 | 7816.7 | 6783.7 | 7633.2 | 7372.9 | 6853.9 | 7324.5 | 8224   | 0.587847454 | 7204.55  | 7443.825 | 239.275 | 0.967855907 | 0.5802   | 1.034  |
| 96042_at   | 396.7  | 410.4  | 374.1  | 418.4  | 495.9  | 471.5  | 454.1  | 530.3  | 0.006315241 | 399.9    | 487.95   | 88.05   | 0.819551184 | 0.003118 | 1.219  |
| 96043_at   | 104.1  | 116.1  | 140.9  | 115.7  | 100.5  | 101.5  | 99.3   | 87.6   | 0.058783146 | 119.2    | 97.225   | 21.975  | 1.226022114 | 0.03227  | -1.221 |
| 96044_at   | 104.2  | 83.7   | 96.9   | 91.3   | 93.1   | 101.5  | 79.5   | 64.5   | 0.358444275 | 94.025   | 84.65    | 9.375   | 1.110750148 | 0.3304   | -1.124 |
| 96045_at   | 427.6  | 408.2  | 425.9  | 392.2  | 446.8  | 475.6  | 365.3  | 387    | 0.857329817 | 413.475  | 418.675  | 5.2     | 0.987579865 | 0.9127   | 1.007  |
| 96046_at   | 1100.4 | 1099.1 | 696.1  | 752.1  | 1002.3 | 884.7  | 925.7  | 931.3  | 0.842055747 | 911.925  | 936      | 24.075  | 0.974278846 | 0.7186   | 1.048  |
| 96047_at   | 143.6  | 275.8  | 200.9  | 254.4  | 218    | 273.7  | 249.3  | 239.6  | 0.452367111 | 218.675  | 245.15   | 26.475  | 0.892004895 | 0.3929   | 1.152  |
| 96048_at   | 191.6  | 206.2  | 186.8  | 231    | 234.8  | 228.5  | 258.3  | 203.9  | 0.116480048 | 203.9    | 231.375  | 27.475  | 0.881253377 | 0.1133   | 1.135  |
| 96049_at   | 8051.6 | 8290.3 | 8192.9 | 7310.8 | 6319.9 | 7798   | 7612.6 | 8143.7 | 0.332269539 | 7961.4   | 7468.55  | 492.85  | 1.065990052 | 0.3256   | -1.07  |
| 96050_at   | 1137.3 | 1366.8 | 1301.7 | 1528.7 | 1202.6 | 984.6  | 1185.3 | 1273.3 | 0.145659262 | 1333.625 | 1161.45  | 172.175 | 1.148241422 | 0.1489   | -1.147 |
| 96051_at   | 32.7   | 24.5   | 32.3   | 40.6   | 10.5   | 24     | 38.4   | 30.1   | 0.363268808 | 32.525   | 25.75    | 6.775   | 1.263106796 | 0.3274   | -1.378 |
| 96052_at   | 1208.5 | 1155.2 | 1003.3 | 905.3  | 1062.6 | 1013.9 | 1068.2 | 994.3  | 0.670867197 | 1068.075 | 1034.75  | 33.325  | 1.032205847 | 0.7202   | 1.026  |
| 96053_i_at | 490.4  | 369.3  | 278.2  | 360.9  | 273.7  | 388.9  | 353    | 338.4  | 0.502820428 | 374.7    | 338.5    | 36.2    | 1.106942393 | 0.5394   | -1.094 |
| 96054_f_at | 504.9  | 582.5  | 636.6  | 450.4  | 390.4  | 559.9  | 622.6  | 476.5  | 0.649065796 | 543.6    | 512.35   | 31.25   | 1.060993462 | 0.6238   | -1.068 |
| 96055_at   | 11.2   | 64.6   | 12.2   | 11.1   | 38.4   | 16.5   | 5.2    | 31.8   | 0.910858433 | 24.775   | 22.975   | 1.8     | 1.078346028 | 0.9797   | 1.017  |
| 96056_at   | 1862   | 2096.2 | 1721   | 1344   | 1757.6 | 2181.7 | 1938.7 | 1697.5 | 0.501213739 | 1755.8   | 1893.875 | 138.075 | 0.927093921 | 0.4737   | 1.087  |
| 96057_at   | 697.6  | 731.2  | 963.6  | 1255.2 | 737.9  | 690.3  | 1085.4 | 1075.4 | 0.933030308 | 911.9    | 897.25   | 14.65   | 1.016327668 | 0.9611   | 1.009  |
| 96058_s_at | 827.1  | 931.4  | 1186.9 | 1462.4 | 1129.5 | 908.9  | 1234.7 | 1289.4 | 0.824173064 | 1101.95  | 1140.625 | 38.675  | 0.966093151 | 0.7479   | 1.051  |
| 96059_at   | 672.1  | 925.2  | 613    | 647.2  | 871.6  | 656.5  | 665.2  | 673.9  | 0.97901505  | 714.375  | 716.8    | 2.425   | 0.996616908 | 0.9351   | 1.01   |
| 96060_at   | 6415.8 | 6692.2 | 5267   | 5697.8 | 7965.2 | 5893.4 | 6207.8 | 6638.5 | 0.289510764 | 6018.2   | 6676.225 | 658.025 | 0.901437564 | 0.28     | 1.107  |
| 96061_at   | 833.8  | 726    | 1043.7 | 976.6  | 801.6  | 719    | 1207.3 | 974    | 0.822905439 | 895.025  | 925.475  | 30.45   | 0.967097977 | 0.8728   | 1.024  |
| 96063_at   | 407.5  | 469.1  | 406.8  | 383.3  | 534.5  | 432.5  | 436.6  | 437.3  | 0.211624818 | 416.675  | 460.225  | 43.55   | 0.905372372 | 0.1924   | 1.103  |
| 96064_at   | 11.9   | 8.9    | 8.8    | 9.5    | 7.4    | 17.2   | 8.8    | 12.6   | 0.500692242 | 9.775    | 11.5     | 1.725   | 0.85        | 0.5826   | 1.123  |
| 96065_at   | 454.4  | 619.3  | 498.8  | 514.2  | 565.6  | 367.7  | 491.1  | 467.5  | 0.400559484 | 521.675  | 472.975  | 48.7    | 1.102965273 | 0.3864   | -1.109 |
| 96066_s_at | 6759.9 | 5730.3 | 5087   | 4495.4 | 5338.8 | 5954.7 | 5039.7 | 5289.1 | 0.84001273  | 5518.15  | 5405.575 | 112.575 | 1.020825722 | 0.9097   | 1.011  |
| 96068_at   | 1477.2 | 1888.1 | 1332   | 1209.9 | 1637.9 | 1161.1 | 1143.8 | 1233.2 | 0.370095441 | 1476.8   | 1294     | 182.8   | 1.141267388 | 0.3494   | -1.138 |
| 96069_at   | 2017   | 1691.6 | 1634.4 | 1173.4 | 1333   | 1550.2 | 1077.6 | 1281.6 | 0.173956258 | 1629.1   | 1310.6   | 318.5   | 1.243018465 | 0.1767   | -1.231 |
| 96070_at   | 292.4  | 229.1  | 192.1  | 158.1  | 174.4  | 270.1  | 210.2  | 202.4  | 0.920943095 | 217.925  | 214.275  | 3.65    | 1.017034185 | 0.9815   | 1.004  |
| 96071_at   | 430.3  | 575    | 504.8  | 473.5  | 727.8  | 603.5  | 404.9  | 503    | 0.443966141 | 495.9    | 559.8    | 63.9    | 0.88585209  | 0.4862   | 1.109  |
| 96072_at   | 5038   | 4518.9 | 4323.9 | 3643   | 4744.7 | 4872.7 | 4751   | 4224.8 | 0.449625849 | 4380.95  | 4648.3   | 267.35  | 0.942484349 | 0.4207   | 1.067  |
| 96073_at   | 1162.3 | 1364.4 | 1576.7 | 1611.5 | 1042.8 | 1558.7 | 1617.6 | 1588   | 0.898098163 | 1428.725 | 1451.775 | 23.05   | 0.984122884 | 0.9478   | 1.009  |
| 96074_at   | 6.1    | 10.6   | 8.7    | 8.1    | 12.3   | 11.3   | 6.4    | 9.2    | 0.411013399 | 8.375    | 9.8      | 1.425   | 0.854591837 | 0.4683   | 1.155  |
| 96075_at   | 2405   | 2117.2 | 2199.2 | 1784.9 | 1769.5 | 2260   | 2065   | 1803.8 | 0.414602374 | 2126.575 | 1974.575 | 152     | 1.07697859  | 0.4215   | -1.076 |
| 96076_at   | 1476.9 | 1587.8 | 1372.3 | 1474.8 | 1567.9 | 1723   | 1420.9 | 1605.8 | 0.236931373 | 1477.95  | 1579.4   | 101.45  | 0.935766747 | 0.2369   | 1.068  |
| 96077_at   | 59.5   | 20     | 19.2   | 21.1   | 20.3   | 47.2   | 14.1   | 29     | 0.857303333 | 29.95    | 27.65    | 2.3     | 1.08318264  | 0.8946   | -1.053 |
| 96078_g_at | 36.7   | 11.5   | 18.8   | 40.8   | 28.9   | 43.2   | 26.3   | 42.6   | 0.363373318 | 26.95    | 35.25    | 8.3     | 0.764539007 | 0.3026   | 1.443  |
| 96079_at   | 901.7  | 992.6  | 1026.5 | 1210.7 | 1027.2 | 802.2  | 980.2  | 930.1  | 0.275404364 | 1032.875 | 934.925  | 97.95   | 1.104767762 | 0.2737   | -1.103 |
| 96081_at   | 2406.5 | 2208.6 | 1768.4 | 1565.1 | 1737.5 | 2116.1 | 1657.5 | 1594.5 | 0.395203203 | 1987.15  | 1776.4   | 210.75  | 1.11863882  | 0.4106   | -1.109 |
| 96082_at   | 1722.7 | 1779.5 | 831.6  | 795.7  | 1266.4 | 957.6  | 846.9  | 773.1  | 0.333620193 | 1282.375 | 961      | 321.375 | 1.334417274 | 0.3776   | -1.264 |
| 96083_s_at | 4340.1 | 4284   | 4236.9 | 4887.9 | 4885.7 | 4462   | 4863.7 | 4870.3 | 0.125705211 | 4437.225 | 4770.425 | 333.2   | 0.930152974 | 0.1153   | 1.076  |
| 96084_at   | 952.3  | 899.1  | 1200.7 | 1306.7 | 1373.8 | 1159.1 | 1486   | 1724   | 0.06576429  | 1089.7   | 1435.725 | 346.025 | 0.758989361 | 0.06335  | 1.32   |
| 96085_at   | 2117.5 | 2256.2 | 1847.9 | 1588.1 | 2028.4 | 1775   | 1098.3 | 1277   | 0.176353112 | 1952.425 | 1544.675 | 407.75  | 1.263971386 | 0.1663   | -1.291 |
| 96086_at   | 1588   | 1880.9 | 1518.3 | 1323.1 | 1918.5 | 1835.7 | 1620.7 | 1409.3 | 0.493684423 | 1577.575 | 1696.05  | 118.475 | 0.930146517 | 0.4925   | 1.076  |
| 96087_at   | 707    | 718.5  | 882.9  | 984.8  | 707    | 680.7  | 980.2  | 1013.4 | 0.849183482 | 823.3    | 845.325  | 22.025  | 0.973944932 | 0.8861   | 1.02   |
| 96088_at   | 494.8  | 540.7  | 712.1  | 530.6  | 891.2  | 710.7  | 828.5  | 701.6  | 0.019012118 | 569.55   | 783      | 213.45  | 0.727394636 | 0.01738  | 1.382  |
| 96089_at   | 253    | 237.2  | 226.9  | 205.8  | 208.1  | 248.2  | 224    | 193.3  | 0.453641522 | 230.725  | 218.4    | 12.325  | 1.05643315  | 0.4442   | -1.058 |
| 96090_g_at | 476.9  | 464.7  | 520.8  | 477.5  | 552.1  | 548.9  | 563.9  | 500.9  | 0.023132504 | 484.975  | 541.45   | 56.475  | 0.89569674  | 0.02273  | 1.116  |



|            |        |        |        |        |        |        |        |        |             |          |          |         |             |         |        |
|------------|--------|--------|--------|--------|--------|--------|--------|--------|-------------|----------|----------|---------|-------------|---------|--------|
| 96091_at   | 82.6   | 95.3   | 115.2  | 67.2   | 70.9   | 49.6   | 132.3  | 72.7   | 0.689236034 | 90.075   | 81.375   | 8.7     | 1.106912442 | 0.5505  | -1.159 |
| 96092_at   | 307.8  | 236    | 222.3  | 189    | 244.4  | 302    | 162.9  | 233    | 0.935621059 | 238.775  | 235.575  | 3.2     | 1.013583784 | 0.9003  | -1.022 |
| 96093_at   | 840.5  | 620    | 564.2  | 569.1  | 696.7  | 821.4  | 550.7  | 568    | 0.909605393 | 648.45   | 659.2    | 10.75   | 0.983692354 | 0.9028  | 1.017  |
| 96094_at   | 18     | 16.2   | 140.4  | 18.8   | 244.7  | 74.8   | 21.1   | 14.8   | 0.542641117 | 48.35    | 88.85    | 40.5    | 0.544175577 | 0.5661  | 1.649  |
| 96095_i_at | 142.2  | 175    | 146.7  | 160.5  | 151.8  | 198.6  | 189.2  | 156.2  | 0.253344791 | 156.1    | 173.95   | 17.85   | 0.897384306 | 0.2499  | 1.11   |
| 96096_f_at | 408.4  | 309    | 396.1  | 387.8  | 430.8  | 523.4  | 474.5  | 334.2  | 0.218633414 | 375.325  | 440.725  | 65.4    | 0.851608146 | 0.2334  | 1.165  |
| 96097_at   | 521.9  | 352.4  | 501.7  | 373.1  | 353.7  | 277.5  | 434.3  | 442.3  | 0.3402953   | 437.275  | 376.95   | 60.325  | 1.160034487 | 0.349   | -1.162 |
| 96098_at   | 628.1  | 651.7  | 577.9  | 576.9  | 675.2  | 690.1  | 613.8  | 627.6  | 0.15150857  | 608.65   | 651.675  | 43.025  | 0.933977826 | 0.1504  | 1.071  |
| 96099_at   | 339.5  | 316.9  | 211.4  | 468.7  | 356.4  | 492.9  | 281.4  | 207.8  | 0.995254843 | 334.125  | 334.625  | 0.5     | 0.99850579  | 0.9712  | 1.009  |
| 96101_at   | 18.8   | 11.3   | 6.2    | 6.4    | 10.9   | 42.6   | 24.7   | 9.9    | 0.240445051 | 10.675   | 22.025   | 11.35   | 0.484676504 | 0.1861  | 1.917  |
| 96102_i_at | 864.9  | 830.2  | 1015.8 | 872.7  | 852.1  | 814.2  | 868.2  | 892.4  | 0.426107525 | 895.9    | 856.725  | 39.175  | 1.045726458 | 0.4149  | -1.043 |
| 96103_f_at | 900.7  | 670.1  | 842.2  | 762.2  | 635.1  | 837    | 775.1  | 555.5  | 0.298813874 | 793.8    | 700.675  | 93.125  | 1.132907553 | 0.2902  | -1.141 |
| 96104_at   | 1596.8 | 957.5  | 1287.1 | 1430.2 | 1474.3 | 1598.4 | 1387.3 | 1378.6 | 0.386062146 | 1317.9   | 1459.65  | 141.75  | 0.902887679 | 0.3462  | 1.125  |
| 96106_at   | 759.3  | 792.5  | 636.2  | 539.7  | 776.9  | 643.5  | 486.3  | 539.3  | 0.446969879 | 681.925  | 611.5    | 70.425  | 1.115167621 | 0.4334  | -1.12  |
| 96109_at   | 18     | 19.3   | 10.2   | 15.7   | 11     | 17.9   | 12.7   | 11.8   | 0.374497073 | 15.8     | 13.35    | 2.45    | 1.183520599 | 0.4039  | -1.174 |
| 96110_at   | 518.2  | 551.8  | 478.7  | 517.3  | 609.4  | 530.6  | 548.7  | 634    | 0.075930284 | 516.5    | 580.675  | 64.175  | 0.889482068 | 0.06463 | 1.123  |
| 96112_at   | 1296.2 | 1497.6 | 1455.5 | 1728.1 | 1682.5 | 1467.1 | 1714   | 1738.1 | 0.206754021 | 1494.35  | 1650.425 | 156.075 | 0.905433449 | 0.1988  | 1.108  |
| 96113_at   | 3363.4 | 2682.4 | 2117.1 | 1982.7 | 2683.5 | 2449.5 | 2291.4 | 2067.7 | 0.656295028 | 2536.4   | 2373.025 | 163.375 | 1.068846725 | 0.7245  | -1.05  |
| 96114_at   | 22.1   | 27.1   | 45.6   | 53.2   | 46.4   | 64.6   | 38     | 46.9   | 0.247443839 | 37       | 48.975   | 11.975  | 0.755487494 | 0.2167  | 1.384  |
| 96115_at   | 4036.8 | 4181.9 | 3674.6 | 3294.8 | 4274.1 | 4133.5 | 3448.7 | 3776.6 | 0.696624019 | 3797.025 | 3908.225 | 111.2   | 0.971547186 | 0.6948  | 1.03   |
| 96116_at   | 2.1    | 4.5    | 1.5    | 0.9    | 2.4    | 1.7    | 0.9    | 3      | 0.794925104 | 2.25     | 2        | 0.25    | 1.125       | 0.9882  | 1.007  |
| 96117_r_at | 1769.5 | 2128.1 | 1693.8 | 1420.8 | 1859.8 | 1665.2 | 1462.7 | 1444.3 | 0.44438101  | 1753.05  | 1608     | 145.05  | 1.090205224 | 0.4557  | -1.085 |
| 96118_at   | 177.2  | 200.4  | 95     | 123.4  | 103    | 203.8  | 72.2   | 115.8  | 0.521913552 | 149      | 123.7    | 25.3    | 1.204527082 | 0.461   | -1.241 |
| 96119_s_at | 754.9  | 785.6  | 757.8  | 522.9  | 640    | 832.6  | 711.6  | 613.4  | 0.942567931 | 705.3    | 699.4    | 5.9     | 1.008435802 | 0.9834  | 1.003  |
| 96120_at   | 3017.9 | 3448.2 | 3609.9 | 3472.5 | 3713.6 | 3460.1 | 3581.1 | 3475.2 | 0.290130919 | 3387.125 | 3557.5   | 170.375 | 0.952108222 | 0.2746  | 1.052  |
| 96121_at   | 600    | 540.3  | 720    | 686.4  | 464.5  | 566.3  | 548.9  | 615    | 0.141767235 | 636.675  | 548.675  | 88      | 1.160386385 | 0.1444  | -1.159 |
| 96122_at   | 348.1  | 504.9  | 329.4  | 294.1  | 657.5  | 622.3  | 494.6  | 526.6  | 0.015171142 | 369.125  | 575.25   | 206.125 | 0.641677532 | 0.01455 | 1.582  |
| 96123_at   | 339.9  | 328.1  | 276.2  | 430.5  | 301.4  | 335.2  | 274.3  | 338    | 0.422338933 | 343.675  | 312.225  | 31.45   | 1.100728641 | 0.4348  | -1.091 |
| 96124_at   | 465.9  | 490.9  | 632.8  | 815.2  | 487.2  | 333    | 485    | 463.1  | 0.142232292 | 601.2    | 442.075  | 159.125 | 1.359950235 | 0.1119  | -1.342 |
| 96125_at   | 334.4  | 398.4  | 413.4  | 476.7  | 319.4  | 310.3  | 270.2  | 320.3  | 0.033554849 | 405.725  | 305.05   | 100.675 | 1.330027864 | 0.0153  | -1.323 |
| 96126_at   | 605.1  | 383.9  | 729.6  | 587.8  | 263.6  | 534.6  | 944.4  | 690.1  | 0.851871265 | 576.6    | 608.175  | 31.575  | 0.948082378 | 0.9489  | -1.02  |
| 96127_at   | 796.7  | 838.9  | 1011.5 | 984.1  | 888.3  | 947    | 1026.2 | 995.5  | 0.398763365 | 907.8    | 964.25   | 56.45   | 0.941457091 | 0.3745  | 1.066  |
| 96128_at   | 249.9  | 153    | 199.1  | 189.6  | 183.9  | 233.2  | 158.6  | 196.2  | 0.852475875 | 197.9    | 192.975  | 4.925   | 1.025521441 | 0.8829  | 1.02   |
| 96130_at   | 944    | 880.3  | 926    | 1015.8 | 942.9  | 1071.2 | 976.3  | 1093.2 | 0.1379449   | 941.525  | 1020.9   | 79.375  | 0.922249976 | 0.1342  | 1.084  |
| 96131_at   | 346.6  | 295.8  | 355    | 318    | 284.2  | 323.5  | 268.7  | 315    | 0.148607793 | 328.85   | 297.85   | 31      | 1.104079235 | 0.1508  | -1.104 |
| 96132_at   | 158.8  | 155.7  | 259.3  | 239.5  | 207    | 213.1  | 233.5  | 223.7  | 0.59879599  | 203.325  | 219.325  | 16      | 0.9270489   | 0.4861  | 1.107  |
| 96134_at   | 178.9  | 142.8  | 271.2  | 229.6  | 292.6  | 196.3  | 226.2  | 348.4  | 0.223691511 | 205.625  | 265.875  | 60.25   | 0.773389751 | 0.2193  | 1.299  |
| 96135_at   | 1620.6 | 2070.4 | 2287.6 | 2397.9 | 2222.1 | 2303.6 | 2625.3 | 2445.6 | 0.182001948 | 2094.125 | 2399.15  | 305.025 | 0.872861222 | 0.1767  | 1.156  |
| 96136_at   | 287.6  | 201.5  | 214.3  | 178.6  | 275.3  | 211.9  | 208.8  | 160.8  | 0.856021923 | 220.5    | 214.2    | 6.3     | 1.029411765 | 0.8421  | -1.032 |
| 96138_at   | 523.2  | 647    | 609.6  | 968.3  | 625.2  | 492.1  | 683.6  | 946    | 0.99831339  | 687.025  | 686.725  | 0.3     | 1.000436856 | 0.9956  | 1.001  |
| 96139_at   | 980.9  | 765.8  | 1004.8 | 948.4  | 720.7  | 860.2  | 763.9  | 851    | 0.105794872 | 924.975  | 798.95   | 126.025 | 1.157738281 | 0.1062  | -1.154 |
| 96140_at   | 370.1  | 236.9  | 500.9  | 453.1  | 282.4  | 345.9  | 552    | 463    | 0.813385134 | 390.25   | 410.825  | 20.575  | 0.949917848 | 0.8082  | 1.058  |
| 96143_at   | 46     | 25     | 30.3   | 29.9   | 29.9   | 52.4   | 29     | 31.8   | 0.694427864 | 32.8     | 35.775   | 2.975   | 0.91684137  | 0.6841  | 1.085  |
| 96144_at   | 177.6  | 204.3  | 224.9  | 304.8  | 141.4  | 204    | 205.7  | 172    | 0.196883275 | 227.9    | 180.775  | 47.125  | 1.26068317  | 0.1742  | -1.25  |
| 96145_at   | 565.1  | 468.9  | 562.9  | 488.2  | 460.4  | 487.8  | 367    | 508.5  | 0.155795158 | 521.275  | 455.925  | 65.35   | 1.143334978 | 0.1643  | -1.148 |
| 96146_at   | 980.2  | 885.3  | 1209.4 | 1228.8 | 981.6  | 892.4  | 958.1  | 1067.3 | 0.334553792 | 1075.925 | 974.85   | 101.075 | 1.103682618 | 0.3433  | -1.095 |
| 96147_at   | 128.9  | 105.6  | 172.6  | 193.9  | 132.4  | 180    | 135.9  | 169    | 0.868547595 | 150.25   | 154.325  | 4.075   | 0.973594687 | 0.7814  | 1.047  |
| 96148_at   | 473.6  | 425    | 562.8  | 539.9  | 504.4  | 379.3  | 566.8  | 584.6  | 0.885853449 | 500.325  | 508.775  | 8.45    | 0.98339148  | 0.9413  | 1.009  |
| 96151_at   | 52     | 42.1   | 37.1   | 31.5   | 46.8   | 83     | 51     | 37.4   | 0.266949132 | 40.675   | 54.55    | 13.875  | 0.745646196 | 0.2297  | 1.304  |
| 96152_at   | 864.1  | 927.1  | 1083.6 | 1033.4 | 980.7  | 723.8  | 879.3  | 890.2  | 0.187642334 | 977.05   | 868.5    | 108.55  | 1.124985607 | 0.1934  | -1.127 |
| 96153_at   | 36.7   | 48.9   | 159.4  | 36     | 136.1  | 38.8   | 30.3   | 54.5   | 0.894619445 | 70.25    | 64.925   | 5.325   | 1.082017713 | 0.9348  | -1.042 |
| 96154_at   | 687    | 697    | 682.4  | 656.4  | 679.2  | 704.8  | 628.8  | 539.8  | 0.330270864 | 680.7    | 638.15   | 42.55   | 1.066677114 | 0.2949  | -1.072 |
| 96155_at   | 738.3  | 852    | 467    | 770.7  | 823.4  | 1010.4 | 615.6  | 621.7  | 0.646558631 | 707      | 767.775  | 60.775  | 0.920842695 | 0.6511  | 1.089  |
| 96156_at   | 2480.2 | 2504.8 | 1972.4 | 2237.4 | 3882.9 | 2409   | 2919.5 | 1638.5 | 0.450777331 | 2298.7   | 2712.475 | 413.775 | 0.847454815 | 0.5418  | 1.13   |
| 96157_at   | 1552.1 | 1651.1 | 1657.5 | 1671.7 | 1863.1 | 1450.8 | 1364.4 | 1631   | 0.653688156 | 1633.1   | 1577.325 | 55.775  | 1.0353605   | 0.5789  | -1.042 |
| 96158_at   | 1190.6 | 1033.2 | 1127   | 1171.6 | 1246.2 | 1162.6 | 1010.1 | 1206   | 0.697510907 | 1130.6   | 1156.225 | 25.625  | 0.977837359 | 0.724   | 1.021  |



|            |        |        |        |        |        |        |        |        |             |          |          |         |             |         |        |
|------------|--------|--------|--------|--------|--------|--------|--------|--------|-------------|----------|----------|---------|-------------|---------|--------|
| 96160_at   | 766    | 588.6  | 902    | 889.2  | 686.3  | 909.8  | 719.1  | 784.9  | 0.901399997 | 786.45   | 775.025  | 11.425  | 1.01474146  | 0.9576  | 1.007  |
| 96162_at   | 75.1   | 74.5   | 77.9   | 83.2   | 141.7  | 97.2   | 69.1   | 112.7  | 0.166735779 | 77.675   | 105.175  | 27.5    | 0.73853102  | 0.1265  | 1.311  |
| 96165_at   | 647.5  | 652.5  | 950.1  | 761.5  | 814.9  | 686.8  | 847.5  | 821.7  | 0.639865743 | 752.9    | 792.725  | 39.825  | 0.949761897 | 0.5721  | 1.063  |
| 96166_at   | 1197.2 | 1201.7 | 1438.6 | 1472   | 1214.1 | 1073.5 | 1547.2 | 1409.2 | 0.902985303 | 1327.375 | 1311     | 16.375  | 1.012490465 | 0.8651  | -1.018 |
| 96167_at   | 148.6  | 133.1  | 286.8  | 305.2  | 203.6  | 180.7  | 245    | 291.6  | 0.827714793 | 218.425  | 230.225  | 11.8    | 0.948745792 | 0.6792  | 1.11   |
| 96168_at   | 1247.7 | 1352.1 | 1371.1 | 1413.1 | 1379.6 | 1140.3 | 1728.6 | 1321   | 0.738043224 | 1346     | 1392.375 | 46.375  | 0.966693599 | 0.802   | 1.024  |
| 96169_at   | 77.4   | 86.2   | 135.4  | 268.9  | 86.7   | 107.9  | 93.3   | 134.7  | 0.477045236 | 141.975  | 105.65   | 36.325  | 1.343823947 | 0.5659  | -1.199 |
| 96171_at   | 522    | 469.9  | 436.9  | 416.2  | 500.2  | 509.3  | 399.8  | 540.6  | 0.520115894 | 461.25   | 487.475  | 26.225  | 0.946202369 | 0.5466  | 1.054  |
| 96172_at   | 227    | 256.4  | 312.5  | 227.1  | 299.3  | 313    | 349.8  | 271.1  | 0.091219802 | 255.75   | 308.3    | 52.55   | 0.82954914  | 0.08279 | 1.211  |
| 96174_at   | 456.4  | 421.7  | 495.2  | 707.7  | 385.2  | 290.4  | 315.6  | 398.6  | 0.067930461 | 520.25   | 347.45   | 172.8   | 1.497337746 | 0.02934 | -1.48  |
| 96176_at   | 638.8  | 539.1  | 673.3  | 595.4  | 666.4  | 601.7  | 626.8  | 607.7  | 0.68617202  | 611.65   | 625.65   | 14      | 0.977623272 | 0.6529  | 1.026  |
| 96177_at   | 620.7  | 591.4  | 495    | 564.1  | 589    | 619.3  | 542.7  | 439.9  | 0.689529642 | 567.8    | 547.725  | 20.075  | 1.036651604 | 0.6655  | -1.042 |
| 96178_at   | 1399.8 | 1217.3 | 1662.9 | 1523.2 | 1339.9 | 1351   | 1189.9 | 1252   | 0.176549674 | 1450.8   | 1283.2   | 167.6   | 1.130610973 | 0.1579  | -1.125 |
| 96180_at   | 72.1   | 65.7   | 109.4  | 96.5   | 41     | 112.7  | 125.3  | 88.5   | 0.791354441 | 85.925   | 91.875   | 5.95    | 0.935238095 | 0.9841  | 1.006  |
| 96183_at   | 137.4  | 175.2  | 206.9  | 258.2  | 163.3  | 160.6  | 175.9  | 244.8  | 0.80720743  | 194.425  | 186.15   | 8.275   | 1.044453398 | 0.8512  | -1.033 |
| 96184_at   | 263.1  | 322.9  | 380.4  | 428.6  | 289.6  | 277.4  | 240.3  | 204.4  | 0.069442057 | 348.75   | 252.925  | 95.825  | 1.378867253 | 0.05486 | -1.369 |
| 96185_at   | 1093.9 | 1071.8 | 1426   | 1609.2 | 1457.8 | 1103   | 1360.8 | 1528.1 | 0.713466908 | 1300.225 | 1362.425 | 62.2    | 0.954346111 | 0.6749  | 1.056  |
| 96186_at   | 510.2  | 492    | 711.4  | 600.1  | 469.3  | 488    | 459.7  | 478.3  | 0.127982946 | 578.425  | 473.825  | 104.6   | 1.220756608 | 0.0693  | -1.208 |
| 96187_at   | 685    | 768.4  | 1029   | 1221   | 1142.9 | 946.6  | 1279.8 | 1307.1 | 0.157874625 | 925.85   | 1169.1   | 243.25  | 0.791933966 | 0.1481  | 1.286  |
| 96188_at   | 144.2  | 102.2  | 153.6  | 164.6  | 126.4  | 170.8  | 185.1  | 198.9  | 0.211728687 | 141.15   | 170.3    | 29.15   | 0.828831474 | 0.2405  | 1.209  |
| 96189_at   | 71.4   | 104.1  | 112.3  | 144.2  | 156.4  | 97.7   | 119.7  | 130.6  | 0.385911149 | 108      | 126.1    | 18.1    | 0.856463125 | 0.3665  | 1.187  |
| 96191_at   | 896.1  | 1072.2 | 1143.1 | 1565.4 | 1269.7 | 925.4  | 1044.8 | 1282.1 | 0.825624306 | 1169.2   | 1130.5   | 38.7    | 1.03423264  | 0.8804  | 1.022  |
| 96192_at   | 1768.1 | 1930.5 | 1860.7 | 1863.5 | 2019.1 | 1756.6 | 1702.3 | 2305.5 | 0.567111607 | 1855.7   | 1945.875 | 90.175  | 0.95365838  | 0.5938  | 1.041  |
| 96193_at   | 225.5  | 256.9  | 261.3  | 253.2  | 211.7  | 207.5  | 192.3  | 227.5  | 0.011072447 | 249.225  | 209.75   | 39.475  | 1.188200238 | 0.01151 | -1.188 |
| 96195_at   | 951.3  | 906.6  | 1014.2 | 1108.4 | 823.4  | 812.5  | 823.3  | 987.3  | 0.069943423 | 995.125  | 861.625  | 133.5   | 1.154939794 | 0.06385 | -1.156 |
| 96196_i_at | 684.8  | 639    | 581.7  | 488.1  | 472.5  | 511.1  | 554.6  | 664.1  | 0.450334864 | 598.4    | 550.575  | 47.825  | 1.086863733 | 0.4501  | -1.087 |
| 96197_f_at | 406    | 530.1  | 537.7  | 511.9  | 481.4  | 488.1  | 633.5  | 601.2  | 0.314106987 | 496.425  | 551.05   | 54.625  | 0.900871064 | 0.3263  | 1.109  |
| 96198_at   | 212.4  | 201.7  | 149.1  | 218.8  | 205.3  | 126.9  | 146.8  | 264.2  | 0.792900536 | 195.5    | 185.8    | 9.7     | 1.052206674 | 0.6801  | -1.085 |
| 96199_at   | 196.2  | 201.1  | 208.1  | 231.6  | 164.9  | 207.1  | 187.6  | 205    | 0.201122918 | 209.25   | 191.15   | 18.1    | 1.094690034 | 0.2003  | -1.097 |
| 96200_at   | 1341   | 948.9  | 1116.2 | 1021.8 | 977.7  | 1007   | 950.3  | 987.7  | 0.235049519 | 1106.975 | 980.675  | 126.3   | 1.128788844 | 0.1857  | -1.12  |
| 96201_at   | 155.1  | 129.4  | 137.7  | 142.6  | 117.9  | 142.9  | 156.1  | 152.2  | 0.919563436 | 141.2    | 142.275  | 1.075   | 0.99244421  | 0.9606  | 1.004  |
| 96202_at   | 95.8   | 19.3   | 50.5   | 123.9  | 97.7   | 94.6   | 143.3  | 157.8  | 0.127383233 | 72.375   | 123.35   | 50.975  | 0.586745034 | 0.146   | 2.064  |
| 96203_at   | 399.5  | 497.6  | 322.6  | 398.1  | 560.6  | 490.5  | 377.9  | 481.4  | 0.20926338  | 404.45   | 477.6    | 73.15   | 0.846838358 | 0.2131  | 1.183  |
| 96204_at   | 100.3  | 108.4  | 144.3  | 159.8  | 132.4  | 143    | 136.6  | 120.5  | 0.760487549 | 128.2    | 133.125  | 4.925   | 0.963004695 | 0.6592  | 1.056  |
| 96205_at   | 429.9  | 345.4  | 272.8  | 289.8  | 269.8  | 352.6  | 263.6  | 291.6  | 0.373004678 | 334.475  | 294.4    | 40.075  | 1.136124321 | 0.368   | -1.126 |
| 96206_at   | 298.5  | 316.5  | 341.9  | 332    | 280.8  | 310    | 270.6  | 273.7  | 0.025970063 | 322.225  | 283.775  | 38.45   | 1.13549467  | 0.02492 | -1.136 |
| 96207_at   | 610.4  | 724.8  | 782.6  | 1007   | 807.9  | 523.8  | 969.5  | 1026.5 | 0.730801851 | 781.2    | 831.925  | 50.725  | 0.939026956 | 0.8067  | 1.048  |
| 96208_at   | 237.3  | 369.7  | 437.4  | 479    | 381.5  | 249.1  | 355    | 427.6  | 0.688049888 | 380.85   | 353.3    | 27.55   | 1.077979055 | 0.7657  | -1.063 |
| 96211_at   | 219.6  | 155.6  | 177.8  | 261.7  | 157.1  | 332.9  | 263.3  | 287.1  | 0.255509842 | 203.675  | 260.1    | 56.425  | 0.783064206 | 0.2972  | 1.256  |
| 96212_at   | 550.6  | 609.7  | 815.8  | 1073.8 | 698.3  | 625.6  | 664.8  | 838.4  | 0.684319529 | 762.475  | 706.775  | 55.7    | 1.078808673 | 0.7826  | -1.048 |
| 96214_at   | 222.8  | 188.7  | 170.4  | 209    | 133.8  | 288    | 166.3  | 169.5  | 0.828173741 | 197.725  | 189.4    | 8.325   | 1.043954593 | 0.6589  | -1.084 |
| 96215_f_at | 952.9  | 979.8  | 694    | 1401.6 | 2050.3 | 1278.3 | 1431.1 | 1222.1 | 0.091146855 | 1007.075 | 1495.45  | 488.375 | 0.673426059 | 0.07187 | 1.499  |
| 96216_at   | 231.6  | 199.2  | 255.7  | 234.2  | 201.2  | 291.9  | 299.6  | 268    | 0.229662123 | 230.175  | 265.175  | 35      | 0.86801169  | 0.2503  | 1.143  |
| 96217_at   | 252.5  | 242.6  | 242    | 177.5  | 206.3  | 228.7  | 195.9  | 206.4  | 0.357241611 | 228.65   | 209.325  | 19.325  | 1.092320554 | 0.3954  | -1.084 |
| 96218_at   | 157.2  | 148.9  | 273.3  | 205.3  | 148.1  | 175.4  | 155.8  | 174.8  | 0.339716477 | 196.175  | 163.525  | 32.65   | 1.19966366  | 0.3299  | -1.167 |
| 96219_at   | 280.7  | 230.9  | 273.9  | 271.7  | 256.6  | 251.7  | 247.7  | 330.2  | 0.762414402 | 264.3    | 271.55   | 7.25    | 0.973301418 | 0.7889  | 1.023  |
| 96220_at   | 153    | 184.1  | 218.3  | 268.3  | 190.5  | 117.5  | 266.4  | 273.9  | 0.894653133 | 205.925  | 212.075  | 6.15    | 0.971000825 | 0.9916  | -1.003 |
| 96221_at   | 725.6  | 975.3  | 715.6  | 558.1  | 756.1  | 850.3  | 601.6  | 763.1  | 0.993398176 | 743.65   | 742.775  | 0.875   | 1.001178015 | 0.9388  | 1.011  |
| 96222_at   | 283.2  | 201.5  | 262.4  | 318.8  | 285.2  | 244    | 321.5  | 340.6  | 0.373196948 | 266.475  | 297.825  | 31.35   | 0.894736842 | 0.375   | 1.124  |
| 96223_at   | 228.3  | 256.8  | 234.5  | 293.1  | 271.8  | 214.1  | 289.2  | 349.6  | 0.418699149 | 253.175  | 281.175  | 28      | 0.900417889 | 0.445   | 1.099  |
| 96224_at   | 357.8  | 334.9  | 315.4  | 311.5  | 360.4  | 338.3  | 276.7  | 285.1  | 0.550828375 | 329.9    | 315.125  | 14.775  | 1.046886156 | 0.5079  | -1.052 |
| 96226_at   | 1040.6 | 985.1  | 724.8  | 722.5  | 606    | 588.7  | 615.1  | 610.5  | 0.051964083 | 868.25   | 605.075  | 263.175 | 1.434946081 | 0.01222 | -1.415 |
| 96227_at   | 91.4   | 78.3   | 78.2   | 69.1   | 69.6   | 95.4   | 50.4   | 72.1   | 0.510055518 | 79.25    | 71.875   | 7.375   | 1.102608696 | 0.4401  | -1.125 |
| 96228_at   | 1558.1 | 1711.5 | 2338.7 | 2505.5 | 2771.8 | 3029   | 3737.9 | 3956.5 | 0.010950781 | 2028.45  | 3373.8   | 1345.35 | 0.601235995 | 0.01126 | 1.679  |
| 96229_at   | 28.2   | 23.9   | 14.5   | 14.6   | 11.6   | 56     | 11.1   | 19.6   | 0.723902316 | 20.3     | 24.575   | 4.275   | 0.826042726 | 0.9981  | 1.001  |
| 96230_at   | 19.8   | 40.3   | 52.2   | 90.5   | 34     | 28.5   | 52.9   | 40.1   | 0.497440341 | 50.7     | 38.875   | 11.825  | 1.304180064 | 0.6726  | -1.164 |



|            |         |         |         |         |         |         |         |         |             |           |           |         |             |         |        |
|------------|---------|---------|---------|---------|---------|---------|---------|---------|-------------|-----------|-----------|---------|-------------|---------|--------|
| 96231_at   | 412.1   | 320.4   | 312     | 373.7   | 342.9   | 381.4   | 404.6   | 410.8   | 0.327949849 | 354.55    | 384.925   | 30.375  | 0.921088524 | 0.3085  | 1.09   |
| 96232_at   | 825.3   | 796.9   | 899.4   | 828     | 917.1   | 667.3   | 893.4   | 777.5   | 0.722061964 | 837.4     | 813.825   | 23.575  | 1.028968144 | 0.6638  | -1.036 |
| 96234_at   | 900.5   | 886.4   | 908.5   | 753.6   | 1251.2  | 756.7   | 933.8   | 773.6   | 0.612511464 | 862.25    | 928.825   | 66.575  | 0.928323419 | 0.6683  | 1.058  |
| 96236_at   | 967.9   | 845.3   | 1087.2  | 980.5   | 1232.3  | 948.1   | 1407.4  | 1364.7  | 0.075398903 | 970.225   | 1238.125  | 267.9   | 0.783624432 | 0.06267 | 1.266  |
| 96237_at   | 52.1    | 13.2    | 41.5    | 25.2    | 21.5    | 74.3    | 38      | 22.7    | 0.699274195 | 33        | 39.125    | 6.125   | 0.843450479 | 0.7121  | 1.176  |
| 96238_at   | 360.2   | 425.5   | 547.8   | 542.5   | 492.3   | 393.4   | 517.4   | 465.2   | 0.972575714 | 469       | 467.075   | 1.925   | 1.004121394 | 0.9626  | 1.006  |
| 96239_at   | 600.2   | 612.9   | 536.2   | 625.2   | 621.4   | 571.6   | 604.2   | 648.1   | 0.514377067 | 593.625   | 611.325   | 17.7    | 0.971046497 | 0.5129  | 1.031  |
| 96240_at   | 700.8   | 828.4   | 725.7   | 825.2   | 778     | 596.5   | 662.4   | 751.9   | 0.223125912 | 770.025   | 697.2     | 72.825  | 1.104453528 | 0.2211  | -1.107 |
| 96241_at   | 132.2   | 142.7   | 59.8    | 26      | 27.3    | 133.9   | 51.1    | 87.9    | 0.694061822 | 90.175    | 75.05     | 15.125  | 1.201532312 | 0.7914  | -1.157 |
| 96242_at   | 107.7   | 87.1    | 92.3    | 76.7    | 51.9    | 118.6   | 90      | 48.2    | 0.486546735 | 90.95     | 77.175    | 13.775  | 1.178490444 | 0.3574  | -1.256 |
| 96243_f_at | 387.5   | 439.8   | 560.1   | 679.3   | 588.1   | 372.3   | 489     | 622.6   | 0.988224128 | 516.675   | 518       | 1.325   | 0.997442085 | 0.9689  | 1.007  |
| 96244_at   | 928.3   | 625.9   | 813.5   | 1011.8  | 786.7   | 1010.1  | 1041.3  | 868.6   | 0.459509394 | 844.875   | 926.675   | 81.8    | 0.911727413 | 0.442   | 1.107  |
| 96245_at   | 803.7   | 656.7   | 702.7   | 686.1   | 627.4   | 647.1   | 660.8   | 706.8   | 0.216467446 | 712.3     | 660.525   | 51.775  | 1.078384618 | 0.1945  | -1.076 |
| 96249_at   | 2862.8  | 3082.1  | 2893.4  | 2610.2  | 2728.1  | 2928.7  | 3251.7  | 2799.1  | 0.683679875 | 2862.125  | 2926.9    | 64.775  | 0.977869076 | 0.6875  | 1.022  |
| 96252_at   | 746     | 604.1   | 902.3   | 934.7   | 589.7   | 760.4   | 751.1   | 758.1   | 0.39243295  | 796.775   | 714.825   | 81.95   | 1.114643444 | 0.4325  | -1.105 |
| 96254_at   | 825.5   | 734.7   | 872.7   | 779     | 641.4   | 741.9   | 680.3   | 687     | 0.022207576 | 802.975   | 687.65    | 115.325 | 1.167708864 | 0.01771 | -1.167 |
| 96255_at   | 1488.8  | 1517.3  | 1493.4  | 1528.3  | 1491.6  | 1599.6  | 1498.3  | 1448.5  | 0.943224406 | 1506.95   | 1509.5    | 2.55    | 0.998310699 | 0.9626  | 1.001  |
| 96256_at   | 2193.5  | 3958.9  | 2214.6  | 2534.4  | 2727    | 2565.3  | 2599.9  | 2758.3  | 0.890836689 | 2725.35   | 2662.625  | 62.725  | 1.023557579 | 0.9606  | -1.007 |
| 96257_at   | 1589.9  | 1593.1  | 1639.2  | 1586.4  | 1662.8  | 1488.4  | 1676.1  | 1689    | 0.615243045 | 1602.15   | 1629.075  | 26.925  | 0.983472216 | 0.6345  | 1.016  |
| 96258_at   | 2112.2  | 2651.7  | 1259.7  | 1155.2  | 2095.8  | 1696.5  | 1253.8  | 1368.5  | 0.658087293 | 1794.7    | 1603.65   | 191.05  | 1.119134474 | 0.7648  | -1.075 |
| 96259_at   | 547.7   | 555.3   | 726.8   | 720.6   | 580.3   | 532.3   | 649     | 730     | 0.830656236 | 637.6     | 622.9     | 14.7    | 1.023599294 | 0.8452  | 1.021  |
| 96260_at   | 887.5   | 850.9   | 764.8   | 812.4   | 659.4   | 880.3   | 845     | 822.9   | 0.649288853 | 828.9     | 801.9     | 27      | 1.033670034 | 0.6203  | -1.038 |
| 96261_at   | 2913.9  | 3358.5  | 2010.3  | 2659.3  | 3215.3  | 2466.6  | 2813.1  | 2925.8  | 0.725851973 | 2735.5    | 2855.2    | 119.7   | 0.958076492 | 0.6646  | 1.057  |
| 96262_at   | 1116.9  | 1110.8  | 1048.9  | 1064.4  | 809.5   | 1280.1  | 823.8   | 1095.9  | 0.520556566 | 1085.25   | 1002.325  | 82.925  | 1.082732647 | 0.4189  | -1.103 |
| 96263_at   | 1006.5  | 809.2   | 673.7   | 617.5   | 740.1   | 549.6   | 695.7   | 711.3   | 0.342651819 | 776.725   | 674.175   | 102.55  | 1.15211184  | 0.346   | -1.139 |
| 96264_at   | 917.2   | 769.7   | 923.4   | 790.5   | 904.1   | 943.1   | 844.8   | 775.2   | 0.772114578 | 850.2     | 866.8     | 16.6    | 0.9808491   | 0.766   | 1.02   |
| 96266_at   | 2063.4  | 2181.5  | 2186.7  | 2387.8  | 2116.4  | 2379    | 2692    | 1965.9  | 0.654391352 | 2204.85   | 2288.325  | 83.475  | 0.963521353 | 0.6912  | 1.032  |
| 96267_at   | 7622.7  | 6260.9  | 5297.7  | 4110.5  | 5693.9  | 6334.5  | 4533.8  | 4328    | 0.526443793 | 5822.95   | 5222.55   | 600.4   | 1.114962997 | 0.5688  | -1.101 |
| 96268_at   | 2096    | 1994.3  | 2096.4  | 1756.3  | 2325.4  | 2188.3  | 1973.5  | 1972.4  | 0.315995221 | 1985.75   | 2114.9    | 129.15  | 0.938933283 | 0.3204  | 1.065  |
| 96269_at   | 1060.7  | 837.6   | 828.4   | 923.7   | 916     | 986.9   | 952     | 1042.8  | 0.357461607 | 912.6     | 974.425   | 61.825  | 0.936552326 | 0.3169  | 1.072  |
| 96270_at   | 1397.4  | 1535.6  | 1839    | 1888    | 1714.8  | 1743.2  | 1428.7  | 1433.7  | 0.585186436 | 1665      | 1580.1    | 84.9    | 1.053730777 | 0.6076  | -1.05  |
| 96271_at   | 1730    | 1880.8  | 2151.3  | 2270.6  | 2237.1  | 1987.7  | 2385.7  | 2086.9  | 0.31813756  | 2008.175  | 2174.35   | 166.175 | 0.923574861 | 0.3046  | 1.086  |
| 96272_at   | 785.6   | 756.8   | 944     | 982.1   | 717.9   | 656.8   | 608.1   | 803.7   | 0.054671913 | 867.125   | 696.625   | 170.5   | 1.24475148  | 0.04893 | -1.244 |
| 96273_at   | 8.5     | 19      | 21.8    | 8.4     | 18      | 14.2    | 12.4    | 12.2    | 0.955081735 | 14.425    | 14.2      | 0.225   | 1.01584507  | 0.8153  | 1.068  |
| 96275_f_at | 98.2    | 132.5   | 141.6   | 194.5   | 156.2   | 148.3   | 158.9   | 162.9   | 0.511903478 | 141.7     | 156.575   | 14.875  | 0.904997605 | 0.399   | 1.137  |
| 96276_r_at | 181     | 254.5   | 676.5   | 1090.4  | 317.6   | 307.2   | 881.2   | 629.5   | 0.949486884 | 550.6     | 533.875   | 16.725  | 1.031327558 | 0.821   | 1.123  |
| 96277_at   | 331.3   | 362.2   | 573     | 610.7   | 403.8   | 392.8   | 493.6   | 530.1   | 0.865317989 | 469.3     | 455.075   | 14.225  | 1.031258584 | 0.987   | -1.003 |
| 96278_at   | 477     | 479.2   | 605.3   | 640.8   | 470.8   | 707.9   | 558.7   | 584.4   | 0.661356596 | 550.575   | 580.45    | 29.875  | 0.948531312 | 0.6686  | 1.053  |
| 96280_at   | 1621.7  | 2514.9  | 1614.2  | 1845.2  | 2426.5  | 1823.1  | 1851.1  | 2159.6  | 0.54325208  | 1899      | 2065.075  | 166.075 | 0.919579192 | 0.4784  | 1.098  |
| 96281_at   | 3352.1  | 4176.5  | 3983.1  | 3525    | 5000.6  | 3762.9  | 3986.6  | 4181.2  | 0.207967028 | 3759.175  | 4232.825  | 473.65  | 0.888100737 | 0.1947  | 1.124  |
| 96283_at   | 5320.6  | 5294.7  | 4715.2  | 4377.3  | 5370.7  | 5012    | 4904    | 4935.3  | 0.638273841 | 4926.95   | 5055.5    | 128.55  | 0.974572248 | 0.6027  | 1.029  |
| 96284_at   | 1036.8  | 1174.1  | 1439.1  | 1502.9  | 972.8   | 971.7   | 939.8   | 1108.8  | 0.072322278 | 1288.225  | 998.275   | 289.95  | 1.290451028 | 0.04076 | -1.279 |
| 96285_at   | 4119.1  | 4626.9  | 4572    | 4238.8  | 4261    | 3656.1  | 5324.5  | 4540.1  | 0.886382446 | 4389.2    | 4445.425  | 56.225  | 0.987352165 | 0.9553  | 1.005  |
| 96286_at   | 1170.9  | 868.8   | 1040.2  | 911     | 1107    | 1087.7  | 954.4   | 1060.5  | 0.509732617 | 997.725   | 1052.4    | 54.675  | 0.94804732  | 0.4654  | 1.06   |
| 96287_at   | 71.7    | 125.5   | 104.5   | 25.9    | 59      | 27.6    | 33.3    | 131.7   | 0.578071958 | 81.9      | 62.9      | 19      | 1.302066773 | 0.5605  | -1.359 |
| 96288_at   | 346.2   | 370.5   | 482.1   | 404.7   | 346.2   | 394.9   | 333.2   | 411.3   | 0.43846701  | 400.875   | 371.4     | 29.475  | 1.079361874 | 0.4411  | -1.075 |
| 96289_at   | 2243.4  | 2373.5  | 1795.5  | 1350.6  | 2081.4  | 2036.6  | 1448.8  | 1543.1  | 0.589040706 | 1940.75   | 1777.475  | 163.275 | 1.091857832 | 0.6427  | -1.08  |
| 96290_f_at | 13889.9 | 17196.3 | 11245.5 | 13081   | 13091.7 | 12651.8 | 14554.4 | 14918.8 | 0.972944439 | 13853.175 | 13804.175 | 49      | 1.003549651 | 0.954   | 1.006  |
| 96291_f_at | 3757.4  | 3664.2  | 2727.6  | 2455.3  | 3384.7  | 3604.3  | 2638.9  | 2667    | 0.857294947 | 3151.125  | 3073.725  | 77.4    | 1.025181173 | 0.8979  | -1.018 |
| 96292_r_at | 3115.7  | 3373.1  | 2464.8  | 2208.2  | 2625.6  | 2574.8  | 2447.2  | 2413.3  | 0.38943012  | 2790.45   | 2515.225  | 275.225 | 1.10942361  | 0.4074  | -1.094 |
| 96293_at   | 2660.4  | 2855.1  | 1655    | 1572.8  | 2008    | 2312.4  | 1352.2  | 1530.1  | 0.377095081 | 2185.825  | 1800.675  | 385.15  | 1.213892013 | 0.3976  | -1.198 |
| 96294_s_at | 1107    | 1190.2  | 813.7   | 687.9   | 942.4   | 864     | 619.2   | 599     | 0.240388248 | 949.7     | 756.15    | 193.55  | 1.255967731 | 0.2443  | -1.25  |
| 96295_at   | 1867    | 1742.1  | 2128.9  | 1934.5  | 1683.8  | 1818.4  | 2041.3  | 1764.8  | 0.444694331 | 1918.125  | 1827.075  | 91.05   | 1.049833751 | 0.4384  | -1.05  |
| 96296_at   | 500.1   | 784.8   | 555.4   | 565.5   | 529.7   | 642.2   | 503.9   | 605.3   | 0.679154654 | 601.45    | 570.275   | 31.175  | 1.054666608 | 0.7155  | -1.044 |
| 96297_at   | 592.2   | 569.9   | 559.4   | 526.4   | 593.8   | 455     | 574.5   | 555.5   | 0.635388667 | 561.975   | 544.7     | 17.275  | 1.031714705 | 0.6022  | -1.036 |
| 96298_f_at | 15984.4 | 16165.1 | 11587.5 | 11497.5 | 12299.3 | 13039.3 | 12777.7 | 13159.8 | 0.50667432  | 13808.625 | 12819.025 | 989.6   | 1.077197759 | 0.5515  | -1.063 |



|            |         |         |         |         |         |         |         |         |             |           |           |          |             |          |        |
|------------|---------|---------|---------|---------|---------|---------|---------|---------|-------------|-----------|-----------|----------|-------------|----------|--------|
| 96299_at   | 2522.2  | 2527.9  | 3259    | 3590.2  | 2645.8  | 2473.1  | 3850    | 3441.5  | 0.772926249 | 2974.825  | 3102.6    | 127.775  | 0.958816799 | 0.7951   | 1.038  |
| 96300_f_at | 15247   | 18884.5 | 12348.3 | 13455.3 | 14600.9 | 13209   | 14552.2 | 15198.4 | 0.713546132 | 14983.775 | 14390.125 | 593.65   | 1.041253985 | 0.7772   | -1.029 |
| 96301_at   | 1007.2  | 820.8   | 778.9   | 802.2   | 697.2   | 804.1   | 715.2   | 751.8   | 0.124469529 | 852.275   | 742.075   | 110.2    | 1.14850251  | 0.08873  | -1.144 |
| 96302_at   | 1784.7  | 1529.2  | 1362.6  | 2015.4  | 1737    | 1575.1  | 2152    | 2753.9  | 0.262711587 | 1672.975  | 2054.5    | 381.525  | 0.814297883 | 0.2483   | 1.213  |
| 96305_at   | 979.4   | 1428.7  | 960.6   | 950.3   | 1433.2  | 1081.8  | 884.8   | 1084.4  | 0.808469545 | 1079.75   | 1121.05   | 41.3     | 0.963159538 | 0.7944   | 1.039  |
| 96306_at   | 551     | 481.8   | 351.4   | 277     | 433.2   | 374.3   | 237.6   | 277     | 0.313533737 | 415.3     | 330.525   | 84.775   | 1.256485894 | 0.3266   | -1.247 |
| 96307_s_at | 24801.4 | 26169.9 | 14743.7 | 15739.8 | 18031   | 17144   | 16888.5 | 18139.6 | 0.415372188 | 20363.7   | 17550.775 | 2812.925 | 1.160273549 | 0.47     | -1.123 |
| 96308_r_at | 373.2   | 458.1   | 322.8   | 484.3   | 347.5   | 262.1   | 311.4   | 254.6   | 0.045859115 | 409.6     | 293.9     | 115.7    | 1.393671317 | 0.03339  | -1.387 |
| 96309_r_at | 13.7    | 53      | 9.5     | 7.2     | 11.4    | 11.8    | 22.5    | 7.9     | 0.548858747 | 20.85     | 13.4      | 7.45     | 1.555970149 | 0.7237   | -1.201 |
| 96310_at   | 190.6   | 254.7   | 247.3   | 244.9   | 219.3   | 248.7   | 240.5   | 256.2   | 0.702971861 | 234.375   | 241.175   | 6.8      | 0.971804706 | 0.673    | 1.034  |
| 96311_at   | 154.1   | 124.5   | 116.1   | 170.5   | 82.4    | 137.4   | 67.9    | 96.6    | 0.061895594 | 141.3     | 96.075    | 45.225   | 1.470725995 | 0.05779  | -1.503 |
| 96313_at   | 19.1    | 11.9    | 14.4    | 26      | 8.7     | 14      | 0.7     | 11.3    | 0.07313217  | 17.85     | 8.675     | 9.175    | 2.057636888 | 0.1673   | -3.016 |
| 96316_at   | 28.3    | 35.7    | 18.4    | 27.2    | 15.1    | 35.5    | 14.8    | 30.4    | 0.61064715  | 27.4      | 23.95     | 3.45     | 1.144050104 | 0.5131   | -1.205 |
| 96318_at   | 1573.8  | 1745.1  | 1263.6  | 1002.5  | 1337.2  | 1512    | 1111.4  | 996.1   | 0.467791389 | 1396.25   | 1239.175  | 157.075  | 1.126757722 | 0.5018   | -1.117 |
| 96319_at   | 1657.3  | 1410.2  | 1704.1  | 2000.2  | 1647.6  | 1786.7  | 1606.5  | 1729.3  | 0.997515913 | 1692.95   | 1692.525  | 0.425    | 1.000251104 | 0.9336   | 1.007  |
| 96320_at   | 1094.6  | 1327.3  | 1286.9  | 1542.9  | 1234.2  | 1066.2  | 1333.3  | 1324    | 0.535242276 | 1312.925  | 1239.425  | 73.5     | 1.059301692 | 0.5583   | -1.056 |
| 96321_at   | 4025.9  | 3121.5  | 2942.1  | 2530.5  | 3156.2  | 3616    | 2870.3  | 2702.5  | 0.861103118 | 3155      | 3086.25   | 68.75    | 1.022276225 | 0.9088   | 1.014  |
| 96322_at   | 1421.8  | 1484.9  | 933.4   | 825.4   | 1215.4  | 1232.5  | 918.5   | 1029.1  | 0.731510358 | 1166.375  | 1098.875  | 67.5     | 1.061426459 | 0.8393   | -1.035 |
| 96324_at   | 155.6   | 41.1    | 74      | 121.3   | 66.7    | 132.9   | 103.7   | 89.8    | 0.99278409  | 98        | 98.275    | 0.275    | 0.99720173  | 0.792    | 1.094  |
| 96325_at   | 363.7   | 340.2   | 438.2   | 497.3   | 310.7   | 251.3   | 382.5   | 343.3   | 0.10368485  | 409.85    | 321.95    | 87.9     | 1.273023761 | 0.1004   | -1.274 |
| 96326_at   | 15.6    | 55.7    | 11.8    | 17.5    | 23.4    | 30.6    | 12.4    | 51      | 0.759639605 | 25.15     | 29.35     | 4.2      | 0.856899489 | 0.6268   | 1.26   |
| 96327_at   | 707.1   | 636.8   | 703.5   | 723     | 669.5   | 774.6   | 840     | 625.7   | 0.543421193 | 692.6     | 727.45    | 34.85    | 0.952092927 | 0.5721   | 1.044  |
| 96329_at   | 2673.1  | 2702.8  | 2337.5  | 2011.1  | 2535    | 2310.2  | 1735.5  | 2122.5  | 0.318579132 | 2431.125  | 2175.8    | 255.325  | 1.117347642 | 0.3271   | -1.12  |
| 96331_at   | 807.3   | 1021.3  | 1146.1  | 881.7   | 1083.5  | 909.1   | 1134.3  | 957.7   | 0.559557697 | 964.1     | 1021.15   | 57.05    | 0.944131616 | 0.5278   | 1.065  |
| 96332_at   | 4       | 10.4    | 6.2     | 2.2     | 1.9     | 7.7     | 5.3     | 12.6    | 0.696248906 | 5.7       | 6.875     | 1.175    | 0.829090909 | 0.8134   | 1.137  |
| 96333_g_at | 1650    | 1368.2  | 1478    | 1188.1  | 950.3   | 1649.8  | 1721.1  | 1184.3  | 0.84002449  | 1421.075  | 1376.375  | 44.7     | 1.032476614 | 0.7433   | -1.055 |
| 96334_f_at | 45      | 64.3    | 66.9    | 35.9    | 70.7    | 98.8    | 30.8    | 73.5    | 0.381242448 | 53.025    | 68.45     | 15.425   | 0.774653031 | 0.5089   | 1.227  |
| 96335_at   | 875.5   | 733.4   | 730.4   | 693.8   | 694.1   | 794.8   | 673.2   | 707.8   | 0.434279681 | 758.275   | 717.475   | 40.8     | 1.056866093 | 0.4259   | -1.055 |
| 96336_at   | 5831.7  | 5784    | 6404.2  | 6781.4  | 5001.1  | 4513    | 6199.9  | 5287.3  | 0.074404363 | 6200.325  | 5250.325  | 950      | 1.18094118  | 0.06737  | -1.186 |
| 96337_at   | 123.5   | 115.3   | 142.1   | 110     | 122.1   | 104.9   | 111.4   | 115     | 0.294245095 | 122.725   | 113.35    | 9.375    | 1.082708425 | 0.2791   | -1.079 |
| 96338_at   | 1690.4  | 1582.5  | 1775.6  | 1713.2  | 1685.2  | 1664.9  | 1238    | 1455.8  | 0.187379088 | 1690.425  | 1510.975  | 179.45   | 1.118764374 | 0.168    | -1.126 |
| 96339_at   | 10.7    | 9.2     | 11.6    | 37.4    | 10      | 16.2    | 11.3    | 13      | 0.548092708 | 17.225    | 12.625    | 4.6      | 1.364356436 | 0.6761   | -1.16  |
| 96340_at   | 1330.1  | 1081    | 1453    | 1201.6  | 1237.8  | 1251.7  | 1540    | 1245.3  | 0.648925723 | 1266.425  | 1318.7    | 52.275   | 0.960358687 | 0.6308   | 1.043  |
| 96341_at   | 883.6   | 874.6   | 862.7   | 844.5   | 971.5   | 1026.6  | 933.9   | 860.8   | 0.097095176 | 866.35    | 948.2     | 81.85    | 0.913678549 | 0.0605   | 1.092  |
| 96342_at   | 1213.1  | 975     | 854.9   | 743.5   | 1115.1  | 1038.5  | 896     | 838     | 0.840160887 | 946.625   | 971.9     | 25.275   | 0.973994238 | 0.7776   | 1.037  |
| 96343_at   | 1095.4  | 1358.6  | 1657.4  | 1652    | 1297.3  | 1111.2  | 1382    | 1373.1  | 0.366898509 | 1440.85   | 1290.9    | 149.95   | 1.116159269 | 0.4028   | -1.105 |
| 96344_at   | 392     | 372.5   | 319.7   | 348.6   | 479.8   | 453     | 463.9   | 414.3   | 0.004152362 | 358.2     | 452.75    | 94.55    | 0.791165102 | 0.004774 | 1.266  |
| 96345_at   | 4105.3  | 4203.3  | 3355.8  | 2830.3  | 3796    | 4451.7  | 3359.3  | 3642.3  | 0.654944437 | 3623.675  | 3812.325  | 188.65   | 0.950515761 | 0.6173   | 1.06   |
| 96346_at   | 363.3   | 474.8   | 385.5   | 338.2   | 297.5   | 360.7   | 302     | 327.9   | 0.10179129  | 390.45    | 322.025   | 68.425   | 1.212483503 | 0.07054  | -1.206 |
| 96347_at   | 17.3    | 16.6    | 13.6    | 13.6    | 6.9     | 24.8    | 13.2    | 3.8     | 0.556432783 | 15.275    | 12.175    | 3.1      | 1.254620123 | 0.3086   | -1.577 |
| 96348_at   | 706.7   | 560.3   | 754.2   | 675     | 583.1   | 572.3   | 576.4   | 800.3   | 0.577790336 | 674.05    | 633.025   | 41.025   | 1.064807867 | 0.5396   | -1.07  |
| 96351_at   | 789.3   | 725.8   | 905.6   | 676.4   | 620.4   | 765.3   | 946.9   | 765.2   | 0.998395322 | 774.275   | 774.45    | 0.175    | 0.999774033 | 0.9646   | 1.005  |
| 96352_at   | 1174.2  | 1314.4  | 1051.9  | 968.7   | 1269    | 1137.3  | 862.8   | 1161.5  | 0.869684097 | 1127.3    | 1107.65   | 19.65    | 1.017740261 | 0.8504   | -1.021 |
| 96353_at   | 1820.5  | 1684.3  | 1746.7  | 1252.9  | 1731.1  | 2001.2  | 1437.2  | 1452.7  | 0.87850603  | 1626.1    | 1655.55   | 29.45    | 0.98221135  | 0.8769   | 1.019  |
| 96354_at   | 1343.1  | 1019.3  | 1217.1  | 1109.5  | 1301.8  | 1250.3  | 1240.8  | 1086.1  | 0.594818004 | 1172.25   | 1219.75   | 47.5     | 0.961057594 | 0.5709   | 1.044  |
| 96355_at   | 123.8   | 78.5    | 91.7    | 121.8   | 108.9   | 99.3    | 93.1    | 115.2   | 0.989268247 | 103.95    | 104.125   | 0.175    | 0.998319328 | 0.894    | 1.017  |
| 96356_at   | 20      | 18.3    | 10      | 14.4    | 14.3    | 11      | 13.4    | 8.8     | 0.19960423  | 15.675    | 11.875    | 3.8      | 1.32        | 0.222    | -1.296 |
| 96357_at   | 983.1   | 942.7   | 1042.6  | 780     | 1110.6  | 994.3   | 986.4   | 1080.5  | 0.164383754 | 937.1     | 1042.95   | 105.85   | 0.898509037 | 0.1596   | 1.118  |
| 96358_at   | 24721.3 | 25077.6 | 15588   | 17249.4 | 19181.1 | 18596.5 | 20680.5 | 20209.2 | 0.718166266 | 20659.075 | 19666.825 | 992.25   | 1.050452984 | 0.8302   | -1.028 |
| 96359_at   | 3102.9  | 3218.2  | 3056.5  | 2712.6  | 3111.2  | 3002.8  | 3273.2  | 2865.5  | 0.780075908 | 3022.55   | 3063.175  | 40.625   | 0.986737617 | 0.7708   | 1.014  |
| 96360_at   | 2340.4  | 2426.4  | 3579.4  | 2913    | 2066.6  | 2605.7  | 2624.5  | 2324.2  | 0.257863363 | 2814.8    | 2405.25   | 409.55   | 1.17027336  | 0.239    | -1.159 |
| 96365_at   | 18      | 10.6    | 15.1    | 6.6     | 2       | 22.2    | 2.7     | 3.2     | 0.405501454 | 12.575    | 7.525     | 5.05     | 1.671096346 | 0.1498   | -2.649 |
| 96367_at   | 58.1    | 93.7    | 30.8    | 90.7    | 83.3    | 72      | 82.5    | 79.6    | 0.515458458 | 68.325    | 79.35     | 11.025   | 0.861058601 | 0.3974   | 1.269  |
| 96373_at   | 39.2    | 28.2    | 24.4    | 24.6    | 10.6    | 48.6    | 17.2    | 19      | 0.596280377 | 29.1      | 23.85     | 5.25     | 1.220125786 | 0.3512   | -1.406 |
| 96374_at   | 39.3    | 18.8    | 3.6     | 2.6     | 5.5     | 15.8    | 4.5     | 29.8    | 0.842219099 | 16.075    | 13.9      | 2.175    | 1.15647482  | 0.8822   | 1.13   |
| 96375_at   | 221.3   | 188     | 194     | 284.2   | 235.3   | 258.8   | 234.4   | 321.2   | 0.225444596 | 221.875   | 262.425   | 40.55    | 0.845479661 | 0.1978   | 1.189  |



|            |        |        |        |        |        |        |        |        |             |          |          |         |             |         |        |
|------------|--------|--------|--------|--------|--------|--------|--------|--------|-------------|----------|----------|---------|-------------|---------|--------|
| 96387_at   | 21.5   | 22.6   | 19     | 20.1   | 23.1   | 17.9   | 17.7   | 37.4   | 0.539137862 | 20.8     | 24.025   | 3.225   | 0.865764828 | 0.613   | 1.1    |
| 96388_at   | 32     | 8.4    | 8.3    | 16.1   | 14.4   | 10.2   | 27.3   | 29.8   | 0.586926623 | 16.2     | 20.425   | 4.225   | 0.793145655 | 0.4932  | 1.35   |
| 96389_at   | 49.9   | 19.4   | 36.5   | 39.8   | 33.3   | 47.6   | 43     | 33     | 0.715738762 | 36.4     | 39.225   | 2.825   | 0.927979605 | 0.6176  | 1.124  |
| 96390_at   | 48.1   | 5.9    | 9.6    | 17.8   | 12.9   | 34.2   | 12.3   | 23.3   | 0.977425931 | 20.35    | 20.675   | 0.325   | 0.984280532 | 0.656   | 1.273  |
| 96391_at   | 1121.2 | 992.5  | 1069.3 | 1205.4 | 843.5  | 939.4  | 961.8  | 732.1  | 0.016853476 | 1097.1   | 869.2    | 227.9   | 1.262195122 | 0.0193  | -1.266 |
| 96392_at   | 60.2   | 57.8   | 67.6   | 90     | 82.1   | 82     | 72     | 84.2   | 0.22990909  | 68.9     | 80.075   | 11.175  | 0.860443334 | 0.1719  | 1.178  |
| 96393_at   | 12.1   | 33.2   | 7.8    | 11.2   | 35     | 10.4   | 15.9   | 7.1    | 0.908030945 | 16.075   | 17.1     | 1.025   | 0.94005848  | 0.9337  | 1.041  |
| 96394_at   | 24.9   | 11.7   | 6.6    | 7.1    | 4.3    | 8.7    | 3.4    | 10.9   | 0.28127911  | 12.575   | 6.825    | 5.75    | 1.842490842 | 0.2208  | -1.76  |
| 96400_at   | 2.3    | 2.3    | 2.9    | 1.4    | 10.3   | 14.5   | 3.2    | 16.9   | 0.056993001 | 2.225    | 11.225   | 9       | 0.198218263 | 0.01086 | 4.415  |
| 96408_at   | 7      | 4.8    | 3.7    | 5.7    | 1.4    | 7.8    | 3.9    | 4.2    | 0.544734659 | 5.3      | 4.325    | 0.975   | 1.225433526 | 0.4077  | -1.398 |
| 96413_at   | 25.7   | 2.5    | 3.6    | 3.9    | 7.8    | 18.1   | 3.2    | 17.6   | 0.698092399 | 8.925    | 11.675   | 2.75    | 0.764453961 | 0.4383  | 1.741  |
| 96414_at   | 14.9   | 5.7    | 2.6    | 21.5   | 15.8   | 17.8   | 41.6   | 8.5    | 0.297697079 | 11.175   | 20.925   | 9.75    | 0.534050179 | 0.2355  | 2.15   |
| 96416_f_at | 808    | 814.7  | 529    | 626.1  | 396.3  | 766.6  | 456    | 456    | 0.160914062 | 694.45   | 518.725  | 175.725 | 1.338763314 | 0.1348  | -1.363 |
| 96417_s_at | 31.9   | 6.9    | 6.6    | 13.4   | 18     | 35.1   | 6.2    | 27     | 0.454087746 | 14.7     | 21.575   | 6.875   | 0.681344148 | 0.4539  | 1.529  |
| 96418_r_at | 297.3  | 288.8  | 247    | 323.7  | 161.2  | 402.2  | 229    | 283.3  | 0.725564616 | 289.2    | 268.925  | 20.275  | 1.075392768 | 0.5623  | -1.13  |
| 96419_f_at | 10.4   | 8.3    | 10.2   | 6.5    | 6.3    | 12.4   | 13.4   | 11.7   | 0.306005984 | 8.85     | 10.95    | 2.1     | 0.808219178 | 0.3894  | 1.212  |
| 96420_at   | 27.4   | 4.7    | 9.1    | 9.7    | 4.4    | 14.1   | 7.4    | 4.5    | 0.40270939  | 12.725   | 7.6      | 5.125   | 1.674342105 | 0.3864  | -1.531 |
| 96421_at   | 5.8    | 11.5   | 16     | 7.5    | 31.3   | 32.2   | 3.5    | 30.8   | 0.131802535 | 10.2     | 24.45    | 14.25   | 0.417177914 | 0.3158  | 1.914  |
| 96422_at   | 14.9   | 55     | 22.2   | 23.5   | 17.6   | 14.4   | 21.8   | 43.2   | 0.689109796 | 28.9     | 24.25    | 4.65    | 1.191752577 | 0.7018  | -1.157 |
| 96423_at   | 83.1   | 43.4   | 72.7   | 113.3  | 25     | 122.6  | 86.2   | 89.7   | 0.916190199 | 78.125   | 80.875   | 2.75    | 0.965996909 | 0.8936  | -1.058 |
| 96424_at   | 160.6  | 102.3  | 133    | 153    | 127.9  | 172.4  | 127.5  | 123.1  | 0.978070509 | 137.225  | 137.725  | 0.5     | 0.996369577 | 0.9487  | 1.009  |
| 96426_at   | 6127   | 7956.3 | 5936.3 | 6644.5 | 6933.8 | 6366.8 | 8102.6 | 6876.1 | 0.516875236 | 6666.025 | 7069.825 | 403.8   | 0.942884018 | 0.4855  | 1.063  |
| 96431_at   | 12.4   | 6.7    | 16.7   | 9.1    | 12.1   | 34.3   | 2.4    | 9.5    | 0.669386649 | 11.225   | 14.575   | 3.35    | 0.770154374 | 0.9082  | -1.072 |
| 96433_at   | 9.3    | 8.4    | 10.8   | 21.2   | 23.3   | 23.1   | 16.4   | 10.5   | 0.215702195 | 12.425   | 18.325   | 5.9     | 0.678035471 | 0.1928  | 1.509  |
| 96435_at   | 441.3  | 613.5  | 558.7  | 488.7  | 587.9  | 575.2  | 457.6  | 531.6  | 0.803465686 | 525.55   | 538.075  | 12.525  | 0.976722576 | 0.7814  | 1.027  |
| 96464_at   | 403.7  | 292.9  | 505.6  | 475    | 177.7  | 415.3  | 539.1  | 444.8  | 0.792194423 | 419.3    | 394.225  | 25.075  | 1.063605809 | 0.6819  | -1.125 |
| 96474_at   | 90.6   | 79.4   | 85     | 91.4   | 20.9   | 132    | 102.8  | 65.6   | 0.811631485 | 86.6     | 80.325   | 6.275   | 1.078120137 | 0.5271  | -1.316 |
| 96481_at   | 42.2   | 42.1   | 29.2   | 27.4   | 35.2   | 62.9   | 45.7   | 53.2   | 0.1019713   | 35.225   | 49.25    | 14.025  | 0.715228426 | 0.09621 | 1.395  |
| 96482_at   | 3.1    | 5.3    | 7.2    | 2.3    | 3.2    | 2.9    | 3.4    | 5.2    | 0.546775111 | 4.475    | 3.675    | 0.8     | 1.217687075 | 0.6765  | -1.133 |
| 96483_at   | 7.3    | 3.8    | 5.2    | 6.4    | 3.2    | 11.4   | 10.6   | 9.2    | 0.218905868 | 5.675    | 8.6      | 2.925   | 0.659883721 | 0.3472  | 1.397  |
| 96484_at   | 22.1   | 3.1    | 5.7    | 2.8    | 4.9    | 23.6   | 2.6    | 11.8   | 0.739045149 | 8.425    | 10.725   | 2.3     | 0.785547786 | 0.6803  | 1.344  |
| 96485_at   | 13.2   | 10.5   | 10.8   | 14.3   | 12.3   | 15     | 33.2   | 14.9   | 0.262964565 | 12.2     | 18.85    | 6.65    | 0.647214854 | 0.1687  | 1.439  |
| 96486_at   | 16.9   | 16.7   | 22.5   | 38.4   | 28.1   | 49.7   | 52.8   | 54.2   | 0.030733208 | 23.625   | 46.2     | 22.575  | 0.511363636 | 0.03122 | 2.011  |
| 96487_at   | 17.8   | 30.5   | 22.2   | 18.1   | 23     | 25.2   | 28.9   | 15.6   | 0.809851349 | 22.15    | 23.175   | 1.025   | 0.955771305 | 0.8172  | 1.045  |
| 96488_at   | 25.1   | 12     | 2.7    | 3.6    | 3.9    | 6.8    | 28.3   | 11.8   | 0.814050969 | 10.85    | 12.7     | 1.85    | 0.854330709 | 0.7017  | 1.309  |
| 96489_at   | 6.8    | 13.8   | 12.3   | 10.8   | 16.8   | 16.7   | 18.5   | 18.9   | 0.014618989 | 10.925   | 17.725   | 6.8     | 0.616361072 | 0.0171  | 1.679  |
| 96490_at   | 80.1   | 116.5  | 114.9  | 146.4  | 85.6   | 135.4  | 120    | 156.9  | 0.638702316 | 114.475  | 124.475  | 10      | 0.919662583 | 0.6623  | 1.086  |
| 96491_at   | 270.6  | 269.1  | 280.4  | 241.9  | 290.6  | 278.3  | 273.4  | 245.8  | 0.62224209  | 265.5    | 272.025  | 6.525   | 0.976013234 | 0.6341  | 1.024  |
| 96492_at   | 45.4   | 5.8    | 3.1    | 9.9    | 10.7   | 11.9   | 4.9    | 7.2    | 0.512279469 | 16.05    | 8.675    | 7.375   | 1.850144092 | 0.8101  | -1.165 |
| 96493_at   | 244.3  | 197.9  | 210    | 277.5  | 169.9  | 292.3  | 248.6  | 233.3  | 0.911896605 | 232.425  | 236.025  | 3.6     | 0.984747378 | 0.9691  | 1.006  |
| 96494_at   | 159.7  | 141.7  | 110.3  | 172.3  | 76.6   | 136.9  | 191.7  | 154.9  | 0.837272846 | 146      | 140.025  | 5.975   | 1.042670952 | 0.7248  | -1.084 |
| 96495_at   | 177    | 144.6  | 90.9   | 127.9  | 125.3  | 125.5  | 176.2  | 179.2  | 0.509757576 | 135.1    | 151.55   | 16.45   | 0.891454965 | 0.4848  | 1.137  |
| 96496_g_at | 16.8   | 20.5   | 32.5   | 61.9   | 40.6   | 15.4   | 35.3   | 56.6   | 0.771253466 | 32.925   | 36.975   | 4.05    | 0.890466531 | 0.727   | 1.158  |
| 96497_s_at | 46.5   | 13     | 7.8    | 8.8    | 22.4   | 14.6   | 22.4   | 19.9   | 0.937228039 | 19.025   | 19.825   | 0.8     | 0.95964691  | 0.4841  | 1.368  |
| 96498_at   | 73.4   | 66.1   | 62.4   | 57.3   | 41.8   | 72.3   | 91.8   | 50.8   | 0.960315985 | 64.8     | 64.175   | 0.625   | 1.009738995 | 0.7872  | -1.053 |
| 96499_at   | 12.2   | 15.8   | 0.9    | 6.3    | 1.6    | 11.1   | 0.7    | 0.7    | 0.253198746 | 8.8      | 3.525    | 5.275   | 2.496453901 | 0.2355  | -3.323 |
| 96500_at   | 16.1   | 19.4   | 11.9   | 6.8    | 12.7   | 15.3   | 6.6    | 24.5   | 0.800117732 | 13.55    | 14.775   | 1.225   | 0.917089679 | 0.8811  | 1.057  |
| 96501_at   | 16.1   | 4.7    | 10.9   | 14.5   | 11.2   | 14.9   | 14.6   | 5.1    | 0.977519661 | 11.55    | 11.45    | 0.1     | 1.008733624 | 0.9778  | 1.011  |
| 96502_at   | 39.8   | 20.8   | 17.2   | 15.9   | 20.2   | 24.2   | 28.2   | 22.1   | 0.968002483 | 23.425   | 23.675   | 0.25    | 0.989440338 | 0.7478  | 1.077  |
| 96503_at   | 15.8   | 12.1   | 11.1   | 13.5   | 10.5   | 13.9   | 8.8    | 10.1   | 0.173792252 | 13.125   | 10.825   | 2.3     | 1.212471132 | 0.1571  | -1.22  |
| 96504_at   | 44.2   | 24.3   | 106.1  | 74.9   | 168    | 41.7   | 63.7   | 100.5  | 0.387301628 | 62.375   | 93.475   | 31.1    | 0.667290719 | 0.3818  | 1.514  |
| 96505_at   | 33.5   | 8.8    | 22.4   | 16.7   | 13     | 35.6   | 22.3   | 22.6   | 0.679570793 | 20.35    | 23.375   | 3.025   | 0.870588235 | 0.6094  | 1.208  |
| 96506_at   | 363.8  | 338.1  | 320    | 317.8  | 335.8  | 408.2  | 321    | 354.9  | 0.402843388 | 334.925  | 354.975  | 20.05   | 0.943517149 | 0.3969  | 1.057  |
| 96507_at   | 25.4   | 28.3   | 17.8   | 23.6   | 18.8   | 26.1   | 22.9   | 19.8   | 0.524448671 | 23.775   | 21.9     | 1.875   | 1.085616438 | 0.5577  | -1.08  |
| 96508_at   | 106.6  | 83.1   | 82     | 99.4   | 42.3   | 81.3   | 98.1   | 91.2   | 0.348824075 | 92.775   | 78.225   | 14.55   | 1.186001918 | 0.335   | -1.237 |
| 96509_at   | 26.9   | 18.7   | 16.2   | 4.8    | 8.1    | 8.2    | 19.6   | 22.2   | 0.730968989 | 16.65    | 14.525   | 2.125   | 1.146299484 | 0.8767  | -1.078 |



|            |        |        |        |        |        |        |        |        |             |          |          |         |             |         |        |
|------------|--------|--------|--------|--------|--------|--------|--------|--------|-------------|----------|----------|---------|-------------|---------|--------|
| 96510_at   | 65.3   | 51.6   | 47.6   | 35.5   | 22.3   | 47.6   | 72.8   | 66     | 0.87276852  | 50       | 52.175   | 2.175   | 0.958313368 | 0.9293  | -1.028 |
| 96511_s_at | 79.7   | 39.8   | 54.4   | 58.7   | 50.1   | 82.3   | 56.4   | 86.4   | 0.419606799 | 58.15    | 68.8     | 10.65   | 0.845203488 | 0.4164  | 1.187  |
| 96512_at   | 195.5  | 171.8  | 187.3  | 205    | 107.4  | 202.9  | 219.4  | 196.2  | 0.765645059 | 189.9    | 181.475  | 8.425   | 1.046425127 | 0.6538  | -1.083 |
| 96513_at   | 116.6  | 111.5  | 88.8   | 339.1  | 109.1  | 172.7  | 322.5  | 348.3  | 0.40293316  | 164      | 238.15   | 74.15   | 0.688641612 | 0.3393  | 1.525  |
| 96514_at   | 83.9   | 82.1   | 43.1   | 108.6  | 54.6   | 28.4   | 58.8   | 59.1   | 0.121091063 | 79.425   | 50.225   | 29.2    | 1.581383773 | 0.1413  | -1.565 |
| 96515_at   | 11.5   | 10.5   | 11.4   | 4.5    | 9.6    | 13.4   | 12     | 7.5    | 0.608442867 | 9.475    | 10.625   | 1.15    | 0.891764706 | 0.5739  | 1.168  |
| 96516_at   | 35.3   | 43.1   | 44.4   | 51.8   | 42.3   | 30.7   | 48.4   | 43.6   | 0.651610978 | 43.65    | 41.25    | 2.4     | 1.058181818 | 0.6428  | -1.063 |
| 96517_at   | 35.9   | 26.3   | 18.7   | 31.6   | 22.1   | 38     | 20.8   | 34.2   | 0.912731657 | 28.125   | 28.775   | 0.65    | 0.977410947 | 0.9337  | 1.018  |
| 96518_at   | 9.8    | 14.2   | 20.2   | 27.7   | 16.8   | 9.4    | 10.2   | 38.1   | 0.936474233 | 17.975   | 18.625   | 0.65    | 0.965100671 | 0.8828  | -1.062 |
| 96519_at   | 82.2   | 79.6   | 65.4   | 80.7   | 92.9   | 93     | 59.3   | 51.5   | 0.822306747 | 76.975   | 74.175   | 2.8     | 1.037748568 | 0.6935  | -1.069 |
| 96520_at   | 35.1   | 28.4   | 26     | 25.1   | 4.2    | 31.8   | 26     | 20.9   | 0.282956888 | 28.65    | 20.725   | 7.925   | 1.38238842  | 0.2871  | -1.73  |
| 96521_at   | 81.5   | 77.9   | 59.7   | 70.4   | 92.4   | 92.3   | 63.6   | 62.7   | 0.60482565  | 72.375   | 77.75    | 5.375   | 0.930868167 | 0.6545  | 1.063  |
| 96522_at   | 5430.9 | 5452   | 4685.9 | 3892.9 | 4459   | 5543.5 | 5042.4 | 4042.9 | 0.856514493 | 4865.425 | 4771.95  | 93.475  | 1.019588428 | 0.8746  | 1.018  |
| 96523_at   | 52.8   | 68.7   | 21.6   | 46.1   | 40.1   | 109.2  | 22.7   | 77.1   | 0.52375668  | 47.3     | 62.275   | 14.975  | 0.759534324 | 0.6771  | 1.206  |
| 96524_at   | 427.3  | 407.6  | 602.8  | 593.2  | 542.1  | 476.9  | 548.7  | 588.3  | 0.61263083  | 507.725  | 539      | 31.275  | 0.941975881 | 0.5416  | 1.076  |
| 96525_at   | 15.9   | 16.3   | 10.8   | 10.4   | 8.4    | 14.8   | 9.9    | 11.6   | 0.341654346 | 13.35    | 11.175   | 2.175   | 1.194630872 | 0.3264  | -1.2   |
| 96526_at   | 513.4  | 594.5  | 603.4  | 752.1  | 776.5  | 555.8  | 841.1  | 900.7  | 0.149225772 | 615.85   | 768.525  | 152.675 | 0.80134023  | 0.1572  | 1.239  |
| 96527_at   | 237.2  | 187.7  | 138.3  | 188    | 155.4  | 303.9  | 172.6  | 163.8  | 0.795264667 | 187.8    | 198.925  | 11.125  | 0.9440744   | 0.8582  | 1.036  |
| 96528_at   | 40.6   | 16.3   | 18.1   | 18.4   | 12.3   | 29     | 12.9   | 21.3   | 0.548771589 | 23.35    | 18.875   | 4.475   | 1.237086093 | 0.5172  | -1.225 |
| 96529_at   | 108.1  | 73.4   | 85.9   | 192.2  | 79.3   | 67.9   | 99.8   | 194.9  | 0.914222325 | 114.9    | 110.475  | 4.425   | 1.040054311 | 0.8644  | -1.058 |
| 96530_at   | 383.2  | 384.5  | 700.9  | 729.7  | 415.8  | 383.5  | 505.6  | 610.5  | 0.54602613  | 549.575  | 478.85   | 70.725  | 1.147697609 | 0.6267  | -1.112 |
| 96531_at   | 650.7  | 482.9  | 617.3  | 415.2  | 425    | 460.3  | 554    | 424    | 0.289828696 | 541.525  | 465.825  | 75.7    | 1.162507379 | 0.2964  | -1.151 |
| 96532_at   | 192.4  | 147.9  | 146    | 350.2  | 200    | 161.3  | 322.3  | 386.2  | 0.444237946 | 209.125  | 267.45   | 58.325  | 0.781921855 | 0.4131  | 1.289  |
| 96533_at   | 127.1  | 96.5   | 86.5   | 97.1   | 135.4  | 156.4  | 143.3  | 129.9  | 0.012353379 | 101.8    | 141.25   | 39.45   | 0.720707965 | 0.01032 | 1.399  |
| 96534_at   | 27.1   | 22.7   | 23     | 24.9   | 22.9   | 35.3   | 22.2   | 28.7   | 0.429225193 | 24.425   | 27.275   | 2.85    | 0.895508708 | 0.4436  | 1.1    |
| 96535_at   | 270.3  | 228.4  | 314.2  | 295.4  | 234.4  | 257.6  | 230.8  | 241.8  | 0.146602491 | 277.075  | 241.15   | 35.925  | 1.148973668 | 0.1208  | -1.142 |
| 96536_at   | 39.8   | 28.3   | 19.3   | 35.7   | 31.4   | 49.1   | 33.4   | 36.2   | 0.305088304 | 30.775   | 37.525   | 6.75    | 0.82011992  | 0.2886  | 1.245  |
| 96537_at   | 35.5   | 6.4    | 5.8    | 6.6    | 6.6    | 13.2   | 6.9    | 14.9   | 0.700986556 | 13.575   | 10.4     | 3.175   | 1.305288462 | 0.983   | 1.011  |
| 96538_at   | 7.3    | 5.5    | 9.1    | 8.6    | 8.9    | 6.4    | 5      | 3.3    | 0.279209446 | 7.625    | 5.9      | 1.725   | 1.292372881 | 0.245   | -1.352 |
| 96539_at   | 211.7  | 239.9  | 252    | 236.2  | 220.9  | 220.8  | 253.3  | 215.3  | 0.564912993 | 234.95   | 227.575  | 7.375   | 1.032406899 | 0.563   | -1.032 |
| 96540_at   | 26     | 10.9   | 12.1   | 12.7   | 14.3   | 18.6   | 17.4   | 18.6   | 0.654501316 | 15.425   | 17.225   | 1.8     | 0.895500726 | 0.442   | 1.187  |
| 96541_at   | 406    | 457.9  | 458.9  | 439    | 430.1  | 491.5  | 467.8  | 518.4  | 0.16252957  | 440.45   | 476.95   | 36.5    | 0.923472062 | 0.1597  | 1.082  |
| 96542_at   | 4565.2 | 4439.7 | 4891.8 | 4728.9 | 4135.2 | 5698.1 | 5098.7 | 4594.3 | 0.559510289 | 4656.4   | 4881.575 | 225.175 | 0.953872469 | 0.5915  | 1.042  |
| 96543_at   | 3.9    | 4.4    | 2.2    | 2.2    | 1.3    | 2.8    | 2      | 2.8    | 0.21859189  | 3.175    | 2.225    | 0.95    | 1.426966292 | 0.217   | -1.426 |
| 96544_at   | 3      | 2      | 1.4    | 5.7    | 1.5    | 6.2    | 4      | 2.1    | 0.77555578  | 3.025    | 3.45     | 0.425   | 0.876811594 | 0.7841  | 1.135  |
| 96545_s_at | 182.7  | 188.9  | 261.9  | 344    | 235.1  | 188.8  | 264.3  | 289.5  | 0.999129627 | 244.375  | 244.425  | 0.05    | 0.999795438 | 0.9042  | 1.022  |
| 96546_r_at | 3116.7 | 2389.5 | 2448   | 2602.6 | 2475.6 | 2809.9 | 2564.7 | 2505.5 | 0.795393108 | 2639.2   | 2588.925 | 50.275  | 1.019419257 | 0.8297  | -1.015 |
| 96547_at   | 11.3   | 10.3   | 8.6    | 6.1    | 8.9    | 15.8   | 12.1   | 10     | 0.219626773 | 9.075    | 11.7     | 2.625   | 0.775641026 | 0.2136  | 1.294  |
| 96548_at   | 3.2    | 2.5    | 7.5    | 2.6    | 2.6    | 9.4    | 7.1    | 19.5   | 0.211312771 | 3.95     | 9.65     | 5.7     | 0.409326425 | 0.1663  | 2.157  |
| 96549_at   | 14.4   | 15.5   | 26.8   | 11     | 7.8    | 16.2   | 27.8   | 8.7    | 0.76600125  | 16.925   | 15.125   | 1.8     | 1.119008264 | 0.5991  | -1.214 |
| 96550_at   | 117.1  | 39.7   | 58.9   | 39.1   | 18.2   | 51.8   | 72.1   | 37.8   | 0.425923925 | 63.7     | 44.975   | 18.725  | 1.416342412 | 0.3961  | -1.428 |
| 96551_at   | 5.8    | 26.3   | 15.6   | 34.5   | 10.8   | 11.9   | 14.2   | 6.2    | 0.217241901 | 20.55    | 10.775   | 9.775   | 1.907192575 | 0.2949  | -1.641 |
| 96552_at   | 299.9  | 252.2  | 244    | 243.9  | 257.9  | 268.3  | 338.4  | 232.5  | 0.611747595 | 260      | 274.275  | 14.275  | 0.947953696 | 0.6288  | 1.049  |
| 96553_at   | 13.8   | 6.9    | 13     | 8.8    | 33.1   | 10.6   | 30.4   | 5.5    | 0.276174575 | 10.625   | 19.9     | 9.275   | 0.533919598 | 0.3969  | 1.525  |
| 96554_r_at | 39.7   | 34.4   | 17.6   | 56.2   | 44.3   | 40.1   | 37.7   | 47.9   | 0.545638393 | 36.975   | 42.5     | 5.525   | 0.87        | 0.4184  | 1.242  |
| 96555_at   | 75.3   | 94.8   | 71.6   | 61.9   | 100.4  | 98.9   | 59.2   | 113.8  | 0.265618221 | 75.9     | 93.075   | 17.175  | 0.815471394 | 0.3127  | 1.205  |
| 96556_at   | 10.4   | 9.7    | 8      | 20.1   | 13.3   | 26.9   | 7.4    | 7.7    | 0.752388574 | 12.05    | 13.825   | 1.775   | 0.871609403 | 0.8796  | 1.059  |
| 96557_at   | 370    | 384.1  | 385.8  | 440.4  | 378.3  | 392.6  | 416.5  | 423.4  | 0.699834989 | 395.075  | 402.7    | 7.625   | 0.981065309 | 0.6745  | 1.021  |
| 96558_at   | 237    | 175.8  | 166.9  | 207.4  | 185.9  | 137.1  | 223.7  | 211.2  | 0.779894462 | 196.775  | 189.475  | 7.3     | 1.03852751  | 0.7514  | -1.046 |
| 96559_at   | 22.7   | 22.2   | 22.2   | 34.7   | 23.9   | 41.4   | 29.5   | 26.1   | 0.375839586 | 25.45    | 30.225   | 4.775   | 0.842018197 | 0.3405  | 1.184  |
| 96560_at   | 142.5  | 181.4  | 257.5  | 191.1  | 257.7  | 262.4  | 324.6  | 298.1  | 0.021866729 | 193.125  | 285.7    | 92.575  | 0.675971299 | 0.02189 | 1.506  |
| 96561_at   | 94.3   | 125.2  | 185.6  | 236.8  | 148    | 111.4  | 129.4  | 163.3  | 0.54372177  | 160.475  | 138.025  | 22.45   | 1.162651694 | 0.6676  | -1.105 |
| 96562_at   | 135.4  | 110.9  | 122.4  | 134.3  | 112.9  | 170.4  | 133.7  | 81.8   | 0.959863564 | 125.75   | 124.7    | 1.05    | 1.008420209 | 0.812   | -1.041 |
| 96563_at   | 300.4  | 233.6  | 307.1  | 399.2  | 140.5  | 253.5  | 344.4  | 344.9  | 0.534791027 | 310.075  | 270.825  | 39.25   | 1.144927536 | 0.4841  | -1.194 |
| 96564_at   | 6490.1 | 7376.6 | 5771.4 | 5804.2 | 6590.5 | 6585.2 | 5948.1 | 5666.4 | 0.727942846 | 6360.575 | 6197.55  | 163.025 | 1.026304749 | 0.7502  | -1.023 |
| 96565_at   | 181.3  | 106.7  | 168.5  | 178.8  | 189.8  | 115.1  | 139.4  | 125.9  | 0.525253909 | 158.825  | 142.55   | 16.275  | 1.114170467 | 0.5525  | -1.111 |



|            |         |         |         |         |         |         |         |         |             |           |           |         |             |         |        |
|------------|---------|---------|---------|---------|---------|---------|---------|---------|-------------|-----------|-----------|---------|-------------|---------|--------|
| 96566_at   | 35.8    | 23.7    | 29.6    | 15.7    | 20.3    | 29      | 30.5    | 15.5    | 0.685551149 | 26.2      | 23.825    | 2.375   | 1.099685205 | 0.7242  | -1.092 |
| 96567_at   | 11.3    | 9.9     | 6       | 6.1     | 7.7     | 14.5    | 6.9     | 8.8     | 0.618262508 | 8.325     | 9.475     | 1.15    | 0.878627968 | 0.6019  | 1.135  |
| 96568_at   | 5.3     | 7.6     | 5       | 10.8    | 9.4     | 8.4     | 5.4     | 8.9     | 0.619932519 | 7.175     | 8.025     | 0.85    | 0.894080997 | 0.5375  | 1.154  |
| 96569_at   | 532.6   | 500.2   | 433.9   | 425.1   | 469     | 695.2   | 464.6   | 535.7   | 0.313569498 | 472.95    | 541.125   | 68.175  | 0.874012474 | 0.2926  | 1.134  |
| 96570_at   | 51.5    | 48.3    | 75.5    | 90      | 72.1    | 63      | 65.3    | 76.7    | 0.79301515  | 66.325    | 69.275    | 2.95    | 0.957416095 | 0.6513  | 1.077  |
| 96571_at   | 15.5    | 10.4    | 6       | 6.8     | 6.7     | 35.4    | 4.9     | 6.8     | 0.650564038 | 9.675     | 13.45     | 3.775   | 0.719330855 | 0.9254  | 1.05   |
| 96572_at   | 74.2    | 93.1    | 114.8   | 93.9    | 105.4   | 103     | 111.8   | 100.2   | 0.277414626 | 94        | 105.1     | 11.1    | 0.894386299 | 0.232   | 1.131  |
| 96573_at   | 12720.3 | 13685.1 | 10917.7 | 13001.6 | 11340.9 | 11272.2 | 13363   | 13906.3 | 0.90646052  | 12581.175 | 12470.6   | 110.575 | 1.008866855 | 0.8972  | 1.01   |
| 96574_at   | 114.4   | 74.8    | 68.4    | 63.5    | 46.1    | 156.6   | 41.8    | 62.4    | 0.909559133 | 80.275    | 76.725    | 3.55    | 1.046269143 | 0.624   | -1.185 |
| 96575_at   | 18620.4 | 20095.9 | 12620.6 | 14356.3 | 15296   | 15323.9 | 15631.2 | 16375.4 | 0.693884274 | 16423.3   | 15656.625 | 766.675 | 1.048968089 | 0.7907  | -1.031 |
| 96576_at   | 3.1     | 3.2     | 3.4     | 3.3     | 2.6     | 4.3     | 2.5     | 7.5     | 0.465098249 | 3.25      | 4.225     | 0.975   | 0.769230769 | 0.5342  | 1.183  |
| 96577_i_at | 560.5   | 465.7   | 716.5   | 565.8   | 584.1   | 448.5   | 566     | 621.5   | 0.742349647 | 577.125   | 555.025   | 22.1    | 1.039818026 | 0.7709  | -1.035 |
| 96578_r_at | 499.9   | 565.7   | 674.2   | 801.1   | 584.8   | 644.5   | 627.2   | 717.9   | 0.912416629 | 635.225   | 643.6     | 8.375   | 0.986987259 | 0.8209  | 1.027  |
| 96579_at   | 152     | 109.6   | 120.9   | 154.8   | 114.5   | 107.2   | 145.2   | 118.7   | 0.393984058 | 134.325   | 121.4     | 12.925  | 1.106466227 | 0.4034  | -1.102 |
| 96580_at   | 400.9   | 379.4   | 481.8   | 425.1   | 410.8   | 390.2   | 489     | 451.9   | 0.675961331 | 421.8     | 435.475   | 13.675  | 0.968597508 | 0.67    | 1.033  |
| 96581_at   | 20      | 4.9     | 8.1     | 7.2     | 6.5     | 13.2    | 32.1    | 6.7     | 0.539102073 | 10.05     | 14.625    | 4.575   | 0.687179487 | 0.5616  | 1.342  |
| 96582_at   | 28      | 27      | 17.6    | 27.3    | 24.5    | 24.2    | 19      | 19.3    | 0.315495194 | 24.975    | 21.75     | 3.225   | 1.148275862 | 0.3673  | -1.136 |
| 96583_s_at | 69.1    | 77      | 47.4    | 13.1    | 61.7    | 39.1    | 48.3    | 43.3    | 0.826700029 | 51.65     | 48.1      | 3.55    | 1.073804574 | 0.8094  | 1.111  |
| 96584_f_at | 20.8    | 19      | 38.6    | 34.4    | 9.3     | 51.8    | 12      | 58.8    | 0.748662477 | 28.2      | 32.975    | 4.775   | 0.855193328 | 0.8397  | -1.114 |
| 96585_at   | 54      | 74.9    | 24.2    | 65      | 44.9    | 91.7    | 31.5    | 47      | 0.966457934 | 54.525    | 53.775    | 0.75    | 1.013947001 | 0.9784  | 1.01   |
| 96586_at   | 5.8     | 6.3     | 6.1     | 5.2     | 5.1     | 7.7     | 5.5     | 4.6     | 0.871964204 | 5.85      | 5.725     | 0.125   | 1.021834061 | 0.7313  | -1.044 |
| 96587_at   | 44.2    | 35.9    | 110     | 80.1    | 41.9    | 55.6    | 61.4    | 56.7    | 0.488957848 | 67.55     | 53.9      | 13.65   | 1.253246753 | 0.6344  | -1.146 |
| 96588_at   | 1.4     | 12.7    | 9       | 20.9    | 1.9     | 4.8     | 30.6    | 33      | 0.510734201 | 11        | 17.575    | 6.575   | 0.625889047 | 0.8025  | 1.271  |
| 96589_at   | 22.8    | 13      | 9.4     | 4.5     | 12.1    | 18.1    | 15.5    | 6.2     | 0.910227838 | 12.425    | 12.975    | 0.55    | 0.95761079  | 0.76    | 1.141  |
| 96590_f_at | 106.9   | 106.8   | 113.9   | 119.4   | 184.9   | 83.4    | 108     | 103.1   | 0.742249456 | 111.75    | 119.85    | 8.1     | 0.932415519 | 0.8868  | 1.026  |
| 96591_at   | 177.2   | 106.8   | 210     | 366.4   | 175.6   | 157.9   | 250.3   | 291.2   | 0.956266522 | 215.1     | 218.75    | 3.65    | 0.983314286 | 0.7885  | 1.085  |
| 96592_at   | 146.5   | 145     | 193     | 310.6   | 122.7   | 168.3   | 505.7   | 365.6   | 0.396804617 | 198.775   | 290.575   | 91.8    | 0.68407468  | 0.4916  | 1.316  |
| 96593_at   | 138.1   | 112.1   | 162.9   | 156.6   | 131     | 185.3   | 158.6   | 174     | 0.272125893 | 142.425   | 162.225   | 19.8    | 0.877947295 | 0.2881  | 1.141  |
| 96594_at   | 1278.8  | 1322.9  | 1325.6  | 1218.8  | 1381.4  | 1208    | 1428.2  | 1262.5  | 0.58507315  | 1286.525  | 1320.025  | 33.5    | 0.974621693 | 0.601   | 1.024  |
| 96595_at   | 76      | 53      | 50.3    | 45.7    | 44      | 74.4    | 60.4    | 73      | 0.518440039 | 56.25     | 62.95     | 6.7     | 0.893566322 | 0.5284  | 1.117  |
| 96596_at   | 589.3   | 646.1   | 564.7   | 706.1   | 590.5   | 555.9   | 666.1   | 653.5   | 0.814485771 | 626.55    | 616.5     | 10.05   | 1.016301703 | 0.8251  | -1.015 |
| 96597_at   | 66.4    | 61.1    | 61.1    | 76.3    | 79.9    | 76      | 50.6    | 91.9    | 0.423208099 | 66.225    | 74.6      | 8.375   | 0.887734584 | 0.4982  | 1.105  |
| 96598_at   | 188.1   | 156.5   | 195.3   | 256     | 188.3   | 181.9   | 174     | 239.9   | 0.91235253  | 198.975   | 196.025   | 2.95    | 1.015049101 | 0.9555  | 1.007  |
| 96599_at   | 24.7    | 32.2    | 45.3    | 58.8    | 47.4    | 50.2    | 27.1    | 67.6    | 0.510778329 | 40.25     | 48.075    | 7.825   | 0.837233489 | 0.5278  | 1.198  |
| 96600_at   | 29.8    | 20.6    | 15.8    | 48.9    | 9.4     | 21.7    | 47.9    | 36.9    | 0.986311774 | 28.775    | 28.975    | 0.2     | 0.993097498 | 0.8809  | -1.07  |
| 96601_at   | 13      | 7       | 4.8     | 6.2     | 16.1    | 10.9    | 10.6    | 8.7     | 0.163604634 | 7.75      | 11.575    | 3.825   | 0.669546436 | 0.1216  | 1.561  |
| 96602_g_at | 127     | 74.6    | 100.9   | 116.5   | 89.9    | 167.5   | 91      | 109.6   | 0.669095783 | 104.75    | 114.5     | 9.75    | 0.914847162 | 0.7012  | 1.078  |
| 96603_at   | 384.2   | 371.5   | 407.4   | 455.2   | 435.1   | 406.4   | 570.7   | 513.5   | 0.132828761 | 404.575   | 481.425   | 76.85   | 0.840369736 | 0.1091  | 1.183  |
| 96604_at   | 381.9   | 350.1   | 341.8   | 334.6   | 461.4   | 339.9   | 337.8   | 346.4   | 0.579765707 | 352.1     | 371.375   | 19.275  | 0.948098283 | 0.5934  | 1.047  |
| 96605_at   | 837.4   | 922.7   | 794.1   | 705.1   | 1052.7  | 1135.7  | 841.4   | 886.6   | 0.1018312   | 814.825   | 979.1     | 164.275 | 0.832218364 | 0.09166 | 1.198  |
| 96606_at   | 246.2   | 228.6   | 320.6   | 298.3   | 104     | 244     | 392.6   | 294.5   | 0.830508627 | 273.425   | 258.775   | 14.65   | 1.056612888 | 0.6272  | -1.164 |
| 96607_at   | 377.1   | 352.8   | 493.7   | 392.3   | 369.9   | 359.9   | 415.2   | 413     | 0.692399697 | 403.975   | 389.5     | 14.475  | 1.03716303  | 0.7233  | 1.031  |
| 96608_at   | 937     | 811.4   | 836.5   | 774     | 915.1   | 838.2   | 976.9   | 1080.9  | 0.124717848 | 839.725   | 952.775   | 113.05  | 0.881346593 | 0.1137  | 1.133  |
| 96609_at   | 2489.4  | 2461.5  | 3099.5  | 3159.6  | 2789.4  | 2696.4  | 3309.2  | 3292.3  | 0.413564967 | 2802.5    | 3021.825  | 219.325 | 0.927419688 | 0.4036  | 1.081  |
| 96610_at   | 1088.8  | 1013.3  | 868.5   | 889.5   | 963.9   | 973.1   | 715     | 844.7   | 0.300090446 | 965.025   | 874.175   | 90.85   | 1.103926559 | 0.2993  | -1.108 |
| 96611_at   | 3427.9  | 4012.7  | 2689.9  | 2063.7  | 3320.3  | 3014.6  | 2278    | 2248    | 0.536587442 | 3048.55   | 2715.225  | 333.325 | 1.122761465 | 0.5911  | -1.105 |
| 96613_at   | 1337.6  | 1479.1  | 1542.7  | 1539.6  | 1604.1  | 1658.2  | 1658.2  | 1495.1  | 0.082688405 | 1474.75   | 1603.9    | 129.15  | 0.919477524 | 0.08671 | 1.088  |
| 96614_at   | 457.9   | 432.5   | 707.8   | 664.5   | 536     | 428.4   | 578.6   | 602.8   | 0.731495124 | 565.675   | 536.45    | 29.225  | 1.054478516 | 0.8061  | -1.039 |
| 96615_at   | 1842.5  | 1903.1  | 1378.3  | 1566.7  | 1529.6  | 1776.6  | 1284.1  | 1532.1  | 0.405640792 | 1672.65   | 1530.6    | 142.05  | 1.092806742 | 0.4182  | -1.091 |
| 96616_at   | 934.2   | 857     | 903.4   | 900.1   | 1047.2  | 982.4   | 931.7   | 956     | 0.040339011 | 898.675   | 979.325   | 80.65   | 0.917647359 | 0.03209 | 1.089  |
| 96617_at   | 664     | 712.7   | 803.2   | 766.8   | 625.8   | 535.3   | 690     | 730.3   | 0.136758381 | 736.675   | 645.35    | 91.325  | 1.141512358 | 0.1379  | -1.146 |
| 96618_at   | 715.5   | 780.4   | 600.2   | 519.1   | 748.7   | 717.7   | 533.4   | 558.4   | 0.864445912 | 653.8     | 639.55    | 14.25   | 1.022281292 | 0.8736  | -1.021 |
| 96619_at   | 188.4   | 246.5   | 211.3   | 214.9   | 174.4   | 258     | 234.6   | 214.2   | 0.823025635 | 215.275   | 220.3     | 5.025   | 0.977190195 | 0.8683  | 1.017  |
| 96620_at   | 323.4   | 283.4   | 249     | 242.3   | 178.2   | 285.4   | 226.4   | 221.4   | 0.158026344 | 274.525   | 227.85    | 46.675  | 1.204849682 | 0.1488  | -1.214 |
| 96621_at   | 1040    | 1123.9  | 763.6   | 717.3   | 857.9   | 796.2   | 607.3   | 654.5   | 0.180300084 | 911.2     | 728.975   | 182.225 | 1.249974279 | 0.1702  | -1.239 |
| 96623_at   | 990.6   | 1083.5  | 1272.1  | 1393.2  | 1774.7  | 1225.7  | 1794.7  | 1756.2  | 0.038808655 | 1184.85   | 1637.825  | 452.975 | 0.723428938 | 0.0375  | 1.378  |



|            |        |        |        |        |        |        |         |        |             |          |          |         |             |          |        |
|------------|--------|--------|--------|--------|--------|--------|---------|--------|-------------|----------|----------|---------|-------------|----------|--------|
| 96624_r_at | 76.6   | 71.8   | 81.1   | 97     | 123.1  | 110.5  | 116     | 160.8  | 0.0191357   | 81.625   | 127.6    | 45.975  | 0.639694357 | 0.005832 | 1.556  |
| 96625_at   | 504.6  | 365.7  | 487.8  | 475.6  | 433.5  | 452.1  | 472.3   | 483.4  | 0.95749645  | 458.425  | 460.325  | 1.9     | 0.995872481 | 0.8925   | 1.011  |
| 96626_at   | 775.4  | 994.8  | 1004.2 | 740.7  | 1083.1 | 672.2  | 743.4   | 865.2  | 0.752297416 | 878.775  | 840.975  | 37.8    | 1.044947828 | 0.7124   | -1.052 |
| 96627_at   | 413.6  | 388.1  | 330.8  | 301.9  | 370.5  | 437.3  | 280.2   | 293.4  | 0.777737916 | 358.6    | 345.35   | 13.25   | 1.038366874 | 0.7266   | -1.048 |
| 96628_at   | 881    | 906.4  | 824.9  | 906.5  | 1057.4 | 1073.3 | 1017.3  | 838.3  | 0.116041967 | 879.7    | 996.575  | 116.875 | 0.882723327 | 0.09668  | 1.128  |
| 96629_at   | 683.3  | 986.5  | 1246.9 | 1005.2 | 876.4  | 846.3  | 785.8   | 840.1  | 0.303909584 | 980.475  | 837.15   | 143.325 | 1.171205877 | 0.3237   | -1.146 |
| 96630_at   | 8.1    | 4.4    | 3.4    | 5.9    | 9.1    | 7.9    | 7.7     | 10.1   | 0.041663466 | 5.45     | 8.7      | 3.25    | 0.626436782 | 0.03953  | 1.667  |
| 96632_at   | 9071.4 | 9029   | 7338.9 | 7894.5 | 8745.6 | 8739   | 10072.5 | 8842.8 | 0.207847151 | 8333.45  | 9099.975 | 766.525 | 0.915766252 | 0.1993   | 1.094  |
| 96633_s_at | 4614.3 | 4941   | 5058.5 | 5617.5 | 5618   | 5315.7 | 6146.7  | 5119.7 | 0.159192166 | 5057.825 | 5550.025 | 492.2   | 0.911315715 | 0.1536   | 1.097  |
| 96634_at   | 536.2  | 677.2  | 713.4  | 745.7  | 680    | 570.8  | 583.3   | 657.5  | 0.437401675 | 668.125  | 622.9    | 45.225  | 1.072603949 | 0.4737   | -1.067 |
| 96635_at   | 492    | 388.1  | 537.2  | 665.6  | 626.7  | 553.5  | 461.9   | 577.5  | 0.632448216 | 520.725  | 554.9    | 34.175  | 0.938412327 | 0.5769   | 1.079  |
| 96636_at   | 1487.2 | 1586.4 | 1263.8 | 1057.9 | 1439.8 | 1360.5 | 1194.4  | 1397.2 | 0.995073653 | 1348.825 | 1347.975 | 0.85    | 1.000630575 | 0.9316   | 1.009  |
| 96637_at   | 381.8  | 333.2  | 333.7  | 379.1  | 364.2  | 366.7  | 316.7   | 401.5  | 0.817938112 | 356.95   | 362.275  | 5.325   | 0.985301221 | 0.8359   | 1.014  |
| 96638_at   | 27.4   | 8.2    | 21.8   | 18.2   | 25.8   | 42.1   | 24      | 21     | 0.185606069 | 18.9     | 28.225   | 9.325   | 0.669619132 | 0.1842   | 1.578  |
| 96639_at   | 3.5    | 1.9    | 3.1    | 1.7    | 2.2    | 3.8    | 1       | 2.3    | 0.76727211  | 2.55     | 2.325    | 0.225   | 1.096774194 | 0.6618   | -1.165 |
| 96640_at   | 419.4  | 365.9  | 404.1  | 380.5  | 365.1  | 508    | 369.9   | 408.8  | 0.594252355 | 392.475  | 412.95   | 20.475  | 0.950417726 | 0.6185   | 1.044  |
| 96641_at   | 1587   | 1532.5 | 1406   | 1035.1 | 1588   | 1536.2 | 1203.6  | 1291.5 | 0.92803407  | 1390.15  | 1404.825 | 14.675  | 0.989553859 | 0.8885   | 1.017  |
| 96643_at   | 104.9  | 150.3  | 71.5   | 45     | 95     | 175.6  | 53.5    | 97.1   | 0.729609915 | 92.925   | 105.3    | 12.375  | 0.882478632 | 0.7191   | 1.143  |
| 96644_at   | 30.9   | 22.1   | 19.4   | 33     | 27.2   | 36.6   | 27.3    | 29.5   | 0.381702361 | 26.35    | 30.15    | 3.8     | 0.873963516 | 0.34     | 1.164  |
| 96646_at   | 336.9  | 244.6  | 320.9  | 286.9  | 324.7  | 277.5  | 277.1   | 309.9  | 0.999199297 | 297.325  | 297.3    | 0.025   | 1.00008409  | 0.9538   | 1.005  |
| 96647_at   | 1273.6 | 1503   | 1672.2 | 1615.1 | 1562.1 | 1533.2 | 1386.8  | 1666.3 | 0.848655336 | 1515.975 | 1537.1   | 21.125  | 0.986256587 | 0.8195   | 1.017  |
| 96648_at   | 275.5  | 333.1  | 253.2  | 184    | 266.9  | 223.2  | 211.8   | 196.8  | 0.339511242 | 261.45   | 224.675  | 36.775  | 1.163680872 | 0.3687   | -1.145 |
| 96649_at   | 1655.7 | 1450.5 | 1232.5 | 1126.5 | 1570.7 | 1356.7 | 1212.9  | 1413.3 | 0.879851963 | 1366.3   | 1388.4   | 22.1    | 0.984082397 | 0.8287   | 1.023  |
| 96650_at   | 297.7  | 283.1  | 283.6  | 265.6  | 413    | 372.4  | 284.1   | 372.2  | 0.060569908 | 282.5    | 360.425  | 77.925  | 0.783796906 | 0.03032  | 1.265  |
| 96651_at   | 305.8  | 402.9  | 437.5  | 400.4  | 379.8  | 411.5  | 427.3   | 399    | 0.587671687 | 386.65   | 404.4    | 17.75   | 0.956107814 | 0.5436   | 1.054  |
| 96652_at   | 1365.8 | 1611.5 | 1281.9 | 1197.7 | 1689.2 | 1310.9 | 1271.9  | 1244.8 | 0.91674622  | 1364.225 | 1379.2   | 14.975  | 0.989142256 | 0.9263   | 1.009  |
| 96653_at   | 5010.3 | 5890.4 | 5338.2 | 5502.1 | 5586.9 | 5762.3 | 6459.8  | 6617.3 | 0.080255914 | 5435.25  | 6106.575 | 671.325 | 0.890065217 | 0.07435  | 1.122  |
| 96654_at   | 150.3  | 197.9  | 274.5  | 287.3  | 213.8  | 235.7  | 274.6   | 257.1  | 0.638087143 | 227.5    | 245.3    | 17.8    | 0.927435793 | 0.5424   | 1.11   |
| 96655_g_at | 607.9  | 499.9  | 504.4  | 484.1  | 503.2  | 614.7  | 503.8   | 476.3  | 0.992214103 | 524.075  | 524.5    | 0.425   | 0.999189704 | 1        | 1      |
| 96656_at   | 702.3  | 615.8  | 723.5  | 733.5  | 669.3  | 777    | 613.1   | 630.3  | 0.657044702 | 693.775  | 672.425  | 21.35   | 1.031750753 | 0.6343   | -1.034 |
| 96657_at   | 741.7  | 573.6  | 739.6  | 640.5  | 667.1  | 976.6  | 571.1   | 607.2  | 0.769528917 | 673.85   | 705.5    | 31.65   | 0.9551382   | 0.8404   | 1.029  |
| 96658_at   | 1897.5 | 1975.8 | 1640.5 | 1324.3 | 1549.3 | 1667.6 | 1918.8  | 2083.1 | 0.635214671 | 1709.525 | 1804.7   | 95.175  | 0.947262703 | 0.6167   | 1.061  |
| 96661_at   | 1905   | 1716.5 | 1836.7 | 1682.8 | 1849.8 | 1571.7 | 1657.9  | 1873.4 | 0.621756116 | 1785.25  | 1738.2   | 47.05   | 1.027068232 | 0.6043   | -1.029 |
| 96662_at   | 1497.4 | 2026.2 | 2661.7 | 2817.9 | 2431.7 | 1921.8 | 3252    | 2944   | 0.394768021 | 2250.8   | 2637.375 | 386.575 | 0.853424333 | 0.3977   | 1.184  |
| 96663_at   | 243.1  | 201.2  | 267.1  | 294.2  | 225.5  | 245.2  | 279     | 270.4  | 0.881841697 | 251.4    | 255.025  | 3.625   | 0.985785707 | 0.8356   | 1.021  |
| 96664_at   | 830.1  | 696.4  | 758.5  | 1038.9 | 849.1  | 789.2  | 921.2   | 1012   | 0.515316055 | 830.975  | 892.875  | 61.9    | 0.930673387 | 0.4657   | 1.082  |
| 96665_at   | 1221.3 | 1563.7 | 1621.2 | 1746.3 | 1544.2 | 1504   | 1591.6  | 1794.9 | 0.610384941 | 1538.125 | 1608.675 | 70.55   | 0.956144032 | 0.5771   | 1.052  |
| 96666_at   | 469.1  | 576.1  | 427.7  | 456.1  | 548.3  | 465.1  | 444.9   | 398.8  | 0.703778943 | 482.25   | 464.275  | 17.975  | 1.038716278 | 0.6926   | -1.039 |
| 96667_at   | 1010.9 | 847.4  | 794.2  | 906.9  | 941.2  | 1133.8 | 824.7   | 1062.2 | 0.273611437 | 889.85   | 990.475  | 100.625 | 0.89840733  | 0.278    | 1.109  |
| 96668_at   | 2907.5 | 2476.5 | 1937.2 | 1641.7 | 2098   | 2763.6 | 1968.9  | 2265.2 | 0.924007741 | 2240.725 | 2273.925 | 33.2    | 0.985399694 | 0.8428   | 1.031  |
| 96669_at   | 1095.9 | 1001.9 | 1192.5 | 1093   | 1202.9 | 1215.4 | 1261.6  | 1129.4 | 0.071590718 | 1095.825 | 1202.325 | 106.5   | 0.911421621 | 0.06878  | 1.098  |
| 96670_at   | 399.4  | 486.4  | 570.2  | 310.4  | 545.9  | 403.4  | 513     | 470.8  | 0.544594421 | 441.6    | 483.275  | 41.675  | 0.913765454 | 0.4849   | 1.115  |
| 96672_at   | 127.6  | 181.9  | 132.3  | 140.4  | 166    | 184.2  | 167.5   | 162.7  | 0.140846148 | 145.55   | 170.1    | 24.55   | 0.855673133 | 0.1004   | 1.179  |
| 96674_at   | 1408   | 1353.7 | 1136.9 | 1131.9 | 1621.2 | 987.1  | 1213.4  | 1190.8 | 0.977481948 | 1257.625 | 1253.125 | 4.5     | 1.003591022 | 0.9039   | 1.015  |
| 96675_at   | 3183.1 | 2530.9 | 2860.3 | 2486   | 2877.8 | 3093.4 | 2763.2  | 2648.8 | 0.686232067 | 2765.075 | 2845.8   | 80.725  | 0.971633636 | 0.6458   | 1.033  |
| 96676_at   | 908.6  | 1203.8 | 982.9  | 928.2  | 1015.6 | 1240.2 | 844.8   | 1006.4 | 0.850347277 | 1005.875 | 1026.75  | 20.875  | 0.979668858 | 0.8675   | 1.018  |
| 96677_at   | 385.9  | 449.8  | 601.9  | 589.1  | 408.9  | 408.5  | 372.5   | 427.1  | 0.147319644 | 506.675  | 404.25   | 102.425 | 1.253370439 | 0.1089   | -1.234 |
| 96678_at   | 579.2  | 539    | 375.3  | 528.2  | 389.6  | 693.5  | 582.2   | 550    | 0.555620878 | 505.425  | 553.825  | 48.4    | 0.912607773 | 0.6081   | 1.087  |
| 96679_at   | 88.9   | 81.8   | 178.8  | 71.8   | 56.6   | 106.2  | 119.9   | 84.8   | 0.656178104 | 105.325  | 91.875   | 13.45   | 1.146394558 | 0.7003   | -1.112 |
| 96680_at   | 389.1  | 330.1  | 598.7  | 744.1  | 500.5  | 439.5  | 766.3   | 768.4  | 0.454712763 | 515.5    | 618.675  | 103.175 | 0.833232311 | 0.4221   | 1.227  |
| 96682_at   | 119.4  | 155.2  | 146.6  | 137.1  | 161.5  | 106.1  | 186.1   | 163    | 0.475480042 | 139.575  | 154.175  | 14.6    | 0.905302416 | 0.5578   | 1.087  |
| 96684_at   | 642.5  | 852.4  | 941.6  | 963.5  | 787    | 641.4  | 745.5   | 813    | 0.271296863 | 850      | 746.725  | 103.275 | 1.138303927 | 0.3      | -1.129 |
| 96685_at   | 72.3   | 46.6   | 52.2   | 45.8   | 35.3   | 59.6   | 45.3    | 72.4   | 0.919857401 | 54.225   | 53.15    | 1.075   | 1.020225776 | 0.8438   | -1.04  |
| 96686_i_at | 3234.7 | 3749.4 | 2403.3 | 2541.2 | 3431.4 | 2652.7 | 2833.2  | 2854.1 | 0.916850989 | 2982.15  | 2942.85  | 39.3    | 1.013354401 | 0.9897   | 1.002  |
| 96687_f_at | 1747.2 | 2343.8 | 1621.5 | 1962   | 2490.5 | 2212   | 1831.1  | 2364.8 | 0.20181855  | 1918.625 | 2224.6   | 305.975 | 0.862458419 | 0.1986   | 1.163  |
| 96688_at   | 155.5  | 179.1  | 176.3  | 211.6  | 203    | 196.9  | 209.7   | 232    | 0.082831299 | 180.625  | 210.4    | 29.775  | 0.85848384  | 0.07438  | 1.17   |



|            |         |        |         |         |         |         |         |        |             |          |          |         |             |          |        |
|------------|---------|--------|---------|---------|---------|---------|---------|--------|-------------|----------|----------|---------|-------------|----------|--------|
| 96691_at   | 1076.5  | 995.1  | 810.2   | 1018.6  | 909.2   | 993.4   | 1026.8  | 864.7  | 0.714001577 | 975.1    | 948.525  | 26.575  | 1.028017185 | 0.7518   | 1.025  |
| 96692_at   | 265     | 154.1  | 285.9   | 259.5   | 266.5   | 352.5   | 270.8   | 272.1  | 0.225957188 | 241.125  | 290.475  | 49.35   | 0.830105861 | 0.2355   | 1.229  |
| 96693_at   | 1467.8  | 1464.4 | 1704.2  | 1423.3  | 2136.6  | 1723.3  | 1604.1  | 1443.9 | 0.257543351 | 1514.925 | 1726.975 | 212.05  | 0.877213046 | 0.231    | 1.131  |
| 96694_at   | 21.7    | 37.7   | 34.2    | 39.2    | 23.4    | 53.2    | 33.3    | 43.1   | 0.532429192 | 33.2     | 38.25    | 5.05    | 0.867973856 | 0.6053   | 1.13   |
| 96695_at   | 321.9   | 245.5  | 313.9   | 361.4   | 282.1   | 263.2   | 327.8   | 340.9  | 0.821303274 | 310.675  | 303.5    | 7.175   | 1.023640857 | 0.8557   | 1.02   |
| 96696_at   | 3593.6  | 4169.8 | 4850.4  | 4078.9  | 4003.5  | 4169.5  | 4518.1  | 3406.8 | 0.683920438 | 4173.175 | 4024.475 | 148.7   | 1.036948919 | 0.6902   | -1.036 |
| 96698_at   | 2207    | 1682.2 | 1718.1  | 1593.3  | 1797.1  | 2097.5  | 2033.1  | 1698.5 | 0.551654811 | 1800.15  | 1906.55  | 106.4   | 0.944192389 | 0.5085   | 1.064  |
| 96699_at   | 13307.5 | 13134  | 10753.8 | 12266.3 | 11332.3 | 12150.8 | 12801.3 | 12239  | 0.737311414 | 12365.4  | 12130.85 | 234.55  | 1.019335001 | 0.7722   | 1.017  |
| 96700_r_at | 77.7    | 62.7   | 82.6    | 212.1   | 95.2    | 132.3   | 87.9    | 156.6  | 0.820707919 | 108.775  | 118      | 9.225   | 0.921822034 | 0.5804   | 1.194  |
| 96701_at   | 4061.7  | 3907.9 | 3924.5  | 4124.4  | 3952.2  | 3888.3  | 3792.4  | 3903.1 | 0.110405871 | 4004.625 | 3884     | 120.625 | 1.0310569   | 0.1014   | -1.031 |
| 96703_at   | 10362.9 | 9831   | 7706.8  | 7322.3  | 8786.5  | 8292.9  | 8208.3  | 8082.6 | 0.58825681  | 8805.75  | 8342.575 | 463.175 | 1.055519429 | 0.6415   | -1.044 |
| 96704_at   | 264.9   | 230.4  | 139.5   | 197.4   | 98.2    | 59.6    | 66.5    | 77.2   | 0.011709435 | 208.05   | 75.375   | 132.675 | 2.760199005 | 0.001212 | -2.735 |
| 96707_at   | 1928.7  | 1813.9 | 1727.4  | 1513.9  | 1873.4  | 2013.3  | 1618.9  | 1877.8 | 0.438148262 | 1745.975 | 1845.85  | 99.875  | 0.945892136 | 0.444    | 1.058  |
| 96708_at   | 1995.7  | 2223.2 | 2044.6  | 1872.1  | 2609.8  | 2481.7  | 2427.8  | 2360.4 | 0.003672073 | 2033.9   | 2469.925 | 436.025 | 0.8234663   | 0.003246 | 1.216  |
| 96709_at   | 1199.3  | 1250.2 | 1286.8  | 1088.1  | 1368.9  | 1414.6  | 1225.6  | 1154   | 0.304204445 | 1206.1   | 1290.775 | 84.675  | 0.934399876 | 0.3099   | 1.069  |
| 96710_at   | 3915.2  | 4292.6 | 3815.6  | 4627.3  | 4988.5  | 3628    | 4287.6  | 4803.9 | 0.49262746  | 4162.675 | 4427     | 264.325 | 0.940292523 | 0.5228   | 1.059  |
| 96711_at   | 1208.8  | 1258.6 | 1078.4  | 1284    | 1180.4  | 1342    | 1577.1  | 1278.9 | 0.216788724 | 1207.45  | 1344.6   | 137.15  | 0.897999405 | 0.2009   | 1.11   |
| 96712_at   | 735.8   | 850.2  | 1298.1  | 1009.2  | 1334.4  | 999.3   | 1049.9  | 1258.9 | 0.254248702 | 973.325  | 1160.625 | 187.3   | 0.838621432 | 0.2221   | 1.211  |
| 96713_at   | 115.6   | 126.3  | 165.1   | 196.9   | 163     | 135.4   | 181.6   | 169.1  | 0.616511138 | 150.975  | 162.275  | 11.3    | 0.930365121 | 0.5414   | 1.093  |
| 96716_at   | 1404.3  | 1287.1 | 1250.8  | 1187.1  | 1066.9  | 1205.3  | 1288.8  | 1230.8 | 0.245339386 | 1282.325 | 1197.95  | 84.375  | 1.070432823 | 0.2468   | -1.071 |
| 96717_at   | 1178.8  | 1257.1 | 985.2   | 842.9   | 1289    | 1083.3  | 874     | 977.1  | 0.939887183 | 1066     | 1055.85  | 10.15   | 1.009613108 | 0.9508   | 1.008  |
| 96718_at   | 1813    | 1616   | 1560.5  | 1402.5  | 1290.6  | 1362.7  | 993.7   | 1456.6 | 0.050396745 | 1598     | 1275.9   | 322.1   | 1.252449252 | 0.05841  | -1.26  |
| 96719_i_at | 913.7   | 640.9  | 754.6   | 842.6   | 896.9   | 632.7   | 927.2   | 802.5  | 0.772046037 | 787.95   | 814.825  | 26.875  | 0.967017458 | 0.7949   | 1.032  |
| 96720_f_at | 12.7    | 24.2   | 4.1     | 18.6    | 13.8    | 12.2    | 4       | 26.1   | 0.89354947  | 14.9     | 14.025   | 0.875   | 1.062388592 | 0.8968   | -1.078 |
| 96722_at   | 17.3    | 12.1   | 11.4    | 15.7    | 16.1    | 19.2    | 19.6    | 15.1   | 0.113374857 | 14.125   | 17.5     | 3.375   | 0.807142857 | 0.109    | 1.251  |
| 96723_f_at | 874.6   | 535.3  | 648.2   | 769.9   | 630     | 935.3   | 600.3   | 649    | 0.976072674 | 707      | 703.65   | 3.35    | 1.00476089  | 0.9771   | 1.004  |
| 96724_r_at | 160.6   | 183.4  | 191.5   | 309.8   | 254.6   | 204.8   | 262.1   | 383.8  | 0.247432353 | 211.325  | 276.325  | 65      | 0.764769746 | 0.2063   | 1.316  |
| 96725_at   | 403.4   | 554.4  | 877.6   | 841.6   | 496.4   | 569.4   | 513.4   | 627.8  | 0.385429485 | 669.25   | 551.75   | 117.5   | 1.212958768 | 0.4678   | -1.16  |
| 96726_at   | 1052.3  | 952    | 1351.5  | 1250.9  | 1249.9  | 938.6   | 1274.7  | 1241.3 | 0.84651196  | 1151.675 | 1176.125 | 24.45   | 0.979211393 | 0.8392   | 1.023  |
| 96728_at   | 515.9   | 482.7  | 335.7   | 374.8   | 540.5   | 467.4   | 321.6   | 379.7  | 0.999703482 | 427.275  | 427.3    | 0.025   | 0.999941493 | 0.981    | 1.004  |
| 96729_at   | 31.8    | 47.6   | 45      | 19.6    | 5.6     | 25      | 9.3     | 11.1   | 0.028622562 | 36       | 12.75    | 23.25   | 2.823529412 | 0.02269  | -3.095 |
| 96730_at   | 162.9   | 227    | 213.3   | 140.5   | 219.6   | 180.8   | 224.7   | 217.3  | 0.335415377 | 185.925  | 210.6    | 24.675  | 0.882834758 | 0.3017   | 1.15   |
| 96731_at   | 834.7   | 989.1  | 972     | 1108.7  | 762.7   | 826.2   | 1032    | 1026.1 | 0.497312788 | 976.125  | 911.75   | 64.375  | 1.070605978 | 0.4837   | -1.075 |
| 96732_at   | 902.6   | 741.9  | 879.3   | 978.9   | 743.8   | 1456.7  | 730.2   | 931.8  | 0.641740024 | 875.675  | 965.625  | 89.95   | 0.906847896 | 0.7313   | 1.063  |
| 96733_at   | 681.5   | 637.3  | 914.8   | 970.8   | 608.8   | 666.4   | 669     | 720.5  | 0.203566758 | 801.1    | 666.175  | 134.925 | 1.202536871 | 0.1748   | -1.185 |
| 96734_at   | 990     | 861.6  | 872.9   | 775.4   | 763.2   | 930.3   | 861.8   | 793.5  | 0.537775605 | 874.975  | 837.2    | 37.775  | 1.04512064  | 0.54     | -1.044 |
| 96735_at   | 300.3   | 350.1  | 296.9   | 338.9   | 286.4   | 330.4   | 237     | 292.9  | 0.192944252 | 321.55   | 286.675  | 34.875  | 1.12165344  | 0.1887   | -1.127 |
| 96736_at   | 1508.5  | 1648.1 | 1332    | 1467.2  | 1416    | 1459.7  | 1499.6  | 1660   | 0.821251273 | 1488.95  | 1508.825 | 19.875  | 0.986827498 | 0.806    | 1.014  |
| 96737_at   | 381.3   | 359.1  | 355.7   | 295.6   | 274.1   | 355     | 335     | 299.3  | 0.259259319 | 347.925  | 315.85   | 32.075  | 1.101551369 | 0.2685   | -1.102 |
| 96738_at   | 412.5   | 361.5  | 449.5   | 468.9   | 409.7   | 369.1   | 431.4   | 434    | 0.68451669  | 423.1    | 411.05   | 12.05   | 1.029315168 | 0.7163   | -1.026 |
| 96739_at   | 107.6   | 92.3   | 73.5    | 85.9    | 82.7    | 110.5   | 85.5    | 87.8   | 0.856626889 | 89.825   | 91.625   | 1.8     | 0.980354707 | 0.8341   | 1.023  |
| 96741_at   | 175.5   | 205.9  | 263.4   | 380.3   | 225     | 168.7   | 239.1   | 273.7  | 0.584126192 | 256.275  | 226.625  | 29.65   | 1.130832874 | 0.6491   | -1.099 |
| 96742_at   | 428.5   | 685.3  | 389.3   | 365.1   | 725.6   | 527.8   | 1064.1  | 649.5  | 0.099248837 | 467.05   | 741.75   | 274.7   | 0.629659589 | 0.06506  | 1.587  |
| 96743_at   | 2002.3  | 2374.4 | 2128.7  | 2498.1  | 2618.5  | 2079    | 2397.6  | 2408.3 | 0.460536919 | 2250.875 | 2375.85  | 124.975 | 0.947397773 | 0.4633   | 1.056  |
| 96744_at   | 629.3   | 601.1  | 519.3   | 458.8   | 754.2   | 742.6   | 410.1   | 607.1  | 0.43577792  | 552.125  | 628.5    | 76.375  | 0.878480509 | 0.5182   | 1.115  |
| 96745_at   | 164     | 112.9  | 91.9    | 94.1    | 98.9    | 152.9   | 97.4    | 90.2   | 0.799897253 | 115.725  | 109.85   | 5.875   | 1.053482021 | 0.8032   | -1.048 |
| 96746_at   | 207.7   | 220.1  | 267.3   | 337     | 237.6   | 201.4   | 237.1   | 245.9  | 0.427739229 | 258.025  | 230.5    | 27.525  | 1.119414317 | 0.4419   | -1.102 |
| 96747_at   | 717.4   | 664.9  | 870.8   | 929.9   | 1171.9  | 814.6   | 942.8   | 1146   | 0.083407411 | 795.75   | 1018.825 | 223.075 | 0.781046794 | 0.08052  | 1.278  |
| 96748_i_at | 60.6    | 35.9   | 29.4    | 47.9    | 21.9    | 81.3    | 49.9    | 33.3   | 0.838844235 | 43.45    | 46.6     | 3.15    | 0.932403433 | 0.9794   | 1.009  |
| 96749_f_at | 9       | 8.7    | 4.7     | 0.9     | 9       | 7.9     | 13.2    | 4.1    | 0.34780037  | 5.825    | 8.55     | 2.725   | 0.68128655  | 0.341    | 1.843  |
| 96750_at   | 1378    | 1261.6 | 1163.2  | 1172.3  | 1389.3  | 1271.1  | 1089    | 1325.8 | 0.770275652 | 1243.775 | 1268.8   | 25.025  | 0.980276639 | 0.7916   | 1.018  |
| 96751_at   | 1139.3  | 1286.7 | 1469.8  | 1592.3  | 1513.4  | 1113.3  | 1973.9  | 1685.5 | 0.379467495 | 1372.025 | 1571.525 | 199.5   | 0.873053244 | 0.4194   | 1.131  |
| 96752_at   | 49.1    | 54.6   | 46.7    | 45.1    | 74.7    | 88.1    | 59.9    | 89.9   | 0.020152863 | 48.875   | 78.15    | 29.275  | 0.625399872 | 0.004299 | 1.582  |
| 96753_at   | 764.2   | 1043   | 1147    | 1066.2  | 934.7   | 998.6   | 775.9   | 926.7  | 0.363916245 | 1005.1   | 908.975  | 96.125  | 1.105750983 | 0.4076   | -1.098 |
| 96754_s_at | 1835.6  | 1792.1 | 2090.5  | 1802.5  | 1670.4  | 2001.3  | 1670.2  | 1534.5 | 0.239625802 | 1880.175 | 1719.1   | 161.075 | 1.093697283 | 0.2158   | -1.097 |
| 96755_at   | 1895.7  | 1585.9 | 2598.6  | 2077.8  | 1397    | 1296.4  | 1822.9  | 1950.2 | 0.165984399 | 2039.5   | 1616.625 | 422.875 | 1.261578907 | 0.1571   | -1.26  |



|            |        |        |        |        |        |        |        |        |             |          |          |         |             |          |        |
|------------|--------|--------|--------|--------|--------|--------|--------|--------|-------------|----------|----------|---------|-------------|----------|--------|
| 96756_at   | 158    | 155.7  | 184.8  | 178.8  | 199    | 154.9  | 189.4  | 269    | 0.25687446  | 169.325  | 203.075  | 33.75   | 0.833805244 | 0.2261   | 1.179  |
| 96757_at   | 1438.7 | 1413.3 | 1155.6 | 1057.2 | 1437   | 1399.7 | 1174.3 | 1174.6 | 0.807432543 | 1266.2   | 1296.4   | 30.2    | 0.976704721 | 0.7779   | 1.028  |
| 96758_s_at | 42.2   | 76.1   | 8.5    | 50.2   | 5.7    | 32.9   | 52.2   | 69     | 0.832532736 | 44.25    | 39.95    | 4.3     | 1.107634543 | 0.8173   | -1.195 |
| 96759_r_at | 37.2   | 18.6   | 56.7   | 27     | 44.3   | 26.6   | 20.3   | 53.8   | 0.907036936 | 34.875   | 36.25    | 1.375   | 0.962068966 | 0.8835   | 1.051  |
| 96760_at   | 140.6  | 218.8  | 238.4  | 222.8  | 243.5  | 188.8  | 220.4  | 255.4  | 0.443142844 | 205.15   | 227.025  | 21.875  | 0.903644973 | 0.4364   | 1.122  |
| 96761_at   | 469.2  | 383.5  | 374    | 446    | 423.9  | 587.4  | 409    | 428.3  | 0.404245464 | 418.175  | 462.15   | 43.975  | 0.904846911 | 0.391    | 1.098  |
| 96762_at   | 2490.2 | 2314.4 | 2629.9 | 2638.2 | 2503.8 | 2912.7 | 3061.8 | 2806.3 | 0.08206178  | 2518.175 | 2821.15  | 302.975 | 0.892605852 | 0.07698  | 1.119  |
| 96763_at   | 237.3  | 198.2  | 240.8  | 239.1  | 211.3  | 255.6  | 277.1  | 230.4  | 0.438851663 | 228.85   | 243.6    | 14.75   | 0.939449918 | 0.4545   | 1.062  |
| 96764_at   | 82.2   | 136    | 62.2   | 72.6   | 144.8  | 344.2  | 95.5   | 129.3  | 0.207994056 | 88.25    | 178.45   | 90.2    | 0.494536285 | 0.1012   | 1.868  |
| 96765_at   | 4809.3 | 4978.5 | 5246.7 | 5479.2 | 5578.5 | 5389.1 | 7317.6 | 5925.9 | 0.121185492 | 5128.425 | 6052.775 | 924.35  | 0.847284923 | 0.07536  | 1.173  |
| 96766_s_at | 2375.1 | 2227.7 | 2555.1 | 2795.5 | 1942.9 | 1951.2 | 1972.6 | 2034   | 0.02302739  | 2488.35  | 1975.175 | 513.175 | 1.259812422 | 0.003866 | -1.255 |
| 96767_at   | 897    | 807    | 960.8  | 1088.7 | 843.3  | 842.3  | 1005.9 | 1068.4 | 0.985167296 | 938.375  | 939.975  | 1.6     | 0.998297827 | 0.9823   | 1.002  |
| 96768_at   | 251.7  | 187.8  | 240.5  | 293.1  | 242.5  | 205.7  | 278.9  | 148.7  | 0.517229064 | 243.275  | 218.95   | 24.325  | 1.111098424 | 0.4941   | -1.127 |
| 96770_at   | 9.1    | 8.6    | 6.6    | 6.4    | 8.7    | 8.1    | 2.8    | 17.7   | 0.635255704 | 7.675    | 9.325    | 1.65    | 0.8230563   | 0.9749   | 1.013  |
| 96771_at   | 127.4  | 105.7  | 120.3  | 191.1  | 160.8  | 150.9  | 108.7  | 216.2  | 0.459299441 | 136.125  | 159.15   | 23.025  | 0.855325165 | 0.4528   | 1.165  |
| 96772_at   | 429.5  | 505.4  | 447    | 455.4  | 653.9  | 452.6  | 419.9  | 380.6  | 0.797944293 | 459.325  | 476.75   | 17.425  | 0.963450446 | 0.895    | 1.017  |
| 96773_at   | 898.9  | 919.8  | 855.3  | 958    | 941.6  | 830    | 963.6  | 947    | 0.74926066  | 908      | 920.55   | 12.55   | 0.986366846 | 0.7686   | 1.013  |
| 96774_at   | 846.9  | 1051.7 | 1093.4 | 1100.6 | 1127.3 | 988.2  | 1336.5 | 1175.8 | 0.203700264 | 1023.15  | 1156.95  | 133.8   | 0.884351096 | 0.2122   | 1.13   |
| 96775_at   | 409.4  | 321.1  | 320.6  | 422.8  | 386    | 484.7  | 431.6  | 526    | 0.075559855 | 368.475  | 457.075  | 88.6    | 0.806158727 | 0.07551  | 1.243  |
| 96777_at   | 843.4  | 925.1  | 1147.9 | 1052.9 | 1174.9 | 926.1  | 1079   | 1067.3 | 0.445459341 | 992.325  | 1061.825 | 69.5    | 0.934546653 | 0.4312   | 1.074  |
| 96778_at   | 393.3  | 381    | 673    | 707.6  | 468.5  | 433.8  | 644.3  | 669.4  | 0.891127218 | 538.725  | 554      | 15.275  | 0.972427798 | 0.8062   | 1.053  |
| 96779_f_at | 624.4  | 739.4  | 677.9  | 832.3  | 916.2  | 711.6  | 576.9  | 798.5  | 0.717307058 | 718.5    | 750.8    | 32.3    | 0.956979222 | 0.7684   | 1.036  |
| 96780_at   | 222.8  | 244.2  | 259.7  | 270.6  | 236.5  | 252.8  | 191.7  | 276    | 0.646217955 | 249.325  | 239.25   | 10.075  | 1.042110763 | 0.6131   | -1.048 |
| 96781_at   | 471    | 442.4  | 558.3  | 563.3  | 596.6  | 405.8  | 584.3  | 547.7  | 0.660464932 | 508.75   | 533.6    | 24.85   | 0.953429535 | 0.7117   | 1.043  |
| 96782_at   | 503.1  | 436.9  | 385.6  | 481.1  | 446.7  | 326.5  | 454.1  | 433.9  | 0.394406685 | 451.675  | 415.3    | 36.375  | 1.087587286 | 0.4045   | -1.091 |
| 96783_at   | 65.3   | 53.8   | 85.6   | 60.2   | 63.3   | 102.4  | 74.8   | 77.6   | 0.262502917 | 66.225   | 79.525   | 13.3    | 0.832756995 | 0.2397   | 1.201  |
| 96784_at   | 1244.4 | 1003.5 | 1264.3 | 1232   | 1287.4 | 1073.2 | 1140.5 | 1037.2 | 0.555692709 | 1186.05  | 1134.575 | 51.475  | 1.045369411 | 0.5692   | -1.045 |
| 96785_at   | 649.5  | 649.8  | 750.1  | 672.3  | 906.2  | 641.2  | 851.6  | 721.1  | 0.201440724 | 680.425  | 780.025  | 99.6    | 0.872311785 | 0.183    | 1.138  |
| 96786_s_at | 60     | 101.6  | 54.5   | 52.1   | 87.5   | 34     | 68.3   | 89     | 0.883302042 | 67.05    | 69.7     | 2.65    | 0.961979914 | 0.9696   | 1.011  |
| 96787_at   | 123.2  | 90.8   | 56     | 37.2   | 62.7   | 139.6  | 81.5   | 76.8   | 0.619580571 | 76.8     | 90.15    | 13.35   | 0.851913478 | 0.5223   | 1.238  |
| 96789_i_at | 94.4   | 102.8  | 116.9  | 130.6  | 112    | 130.5  | 115.4  | 90.6   | 0.936579803 | 111.175  | 112.125  | 0.95    | 0.991527313 | 0.9443   | 1.008  |
| 96790_f_at | 163.7  | 142.3  | 160.7  | 137.6  | 238.8  | 274.9  | 178.9  | 199.7  | 0.037621776 | 151.075  | 223.075  | 72      | 0.677238597 | 0.01105  | 1.461  |
| 96791_at   | 618.9  | 604.6  | 692.9  | 859.8  | 570.5  | 634.4  | 664.4  | 840.3  | 0.846199838 | 694.05   | 677.4    | 16.65   | 1.024579274 | 0.8374   | 1.025  |
| 96792_at   | 32.1   | 37.1   | 32.2   | 20.8   | 46.6   | 49.2   | 14.6   | 22.1   | 0.796774553 | 30.55    | 33.125   | 2.575   | 0.922264151 | 0.9588   | -1.017 |
| 96793_at   | 526.4  | 582.9  | 484.1  | 383.4  | 498.5  | 479    | 419.2  | 412.9  | 0.421441253 | 494.2    | 452.4    | 41.8    | 1.09239611  | 0.4575   | -1.083 |
| 96794_at   | 490.4  | 420.5  | 414    | 409.1  | 317.1  | 402.6  | 454.7  | 368.8  | 0.225129011 | 433.5    | 385.8    | 47.7    | 1.123639191 | 0.2085   | -1.13  |
| 96795_at   | 95.9   | 55.7   | 83.8   | 82.1   | 82.2   | 114.7  | 101.9  | 103.7  | 0.099927447 | 79.375   | 100.625  | 21.25   | 0.788819876 | 0.1167   | 1.283  |
| 96796_f_at | 37.7   | 17.6   | 28.8   | 39.7   | 39     | 41.5   | 17.8   | 24.9   | 0.984873224 | 30.95    | 30.8     | 0.15    | 1.00487013  | 0.9664   | -1.012 |
| 96797_s_at | 710.2  | 559.6  | 870.4  | 778.3  | 609.4  | 663.2  | 598.6  | 649.1  | 0.226760265 | 729.625  | 630.075  | 99.55   | 1.157997064 | 0.2142   | -1.144 |
| 96798_r_at | 2      | 1.2    | 0.9    | 1.3    | 0.9    | 2.4    | 2.1    | 1.8    | 0.306582204 | 1.35     | 1.8      | 0.45    | 0.75        | 0.3932   | 1.301  |
| 96799_at   | 322.4  | 338.9  | 395    | 435.7  | 356.3  | 317    | 357.9  | 409.9  | 0.708167636 | 373      | 360.275  | 12.725  | 1.035320241 | 0.7284   | 1.032  |
| 96801_at   | 67.5   | 100.8  | 83.3   | 68.9   | 145.2  | 89.1   | 143.3  | 98.8   | 0.070577976 | 80.125   | 119.1    | 38.975  | 0.672753988 | 0.04935  | 1.471  |
| 96802_at   | 458.3  | 412.5  | 457.6  | 437.5  | 433    | 469.3  | 397.6  | 464.9  | 0.989456089 | 441.475  | 441.2    | 0.275   | 1.0006233   | 0.9677   | -1.002 |
| 96803_at   | 87.6   | 92.7   | 116.3  | 102.7  | 110.4  | 97.9   | 114.9  | 107    | 0.339304832 | 99.825   | 107.55   | 7.725   | 0.928172943 | 0.3085   | 1.082  |
| 96804_at   | 764.3  | 611    | 647.8  | 680.8  | 573    | 640.6  | 586.2  | 611.7  | 0.108516511 | 675.975  | 602.875  | 73.1    | 1.121252333 | 0.08154  | -1.118 |
| 96806_at   | 527.4  | 461    | 407.6  | 500.9  | 597.2  | 342.5  | 460.8  | 547.2  | 0.846082986 | 474.225  | 486.925  | 12.7    | 0.973917955 | 0.9457   | 1.01   |
| 96807_at   | 51.1   | 39     | 39.5   | 43.8   | 38.2   | 85.5   | 40.1   | 15.8   | 0.923192892 | 43.35    | 44.9     | 1.55    | 0.965478842 | 0.7289   | -1.136 |
| 96808_at   | 116.1  | 40.3   | 51.8   | 65.5   | 18     | 103.1  | 67.9   | 88     | 0.974713434 | 68.425   | 69.25    | 0.825   | 0.988086643 | 0.8511   | -1.094 |
| 96810_at   | 306.8  | 461.3  | 251.5  | 353.7  | 429.9  | 523.4  | 431    | 335.5  | 0.191982378 | 343.325  | 429.95   | 86.625  | 0.798523084 | 0.1807   | 1.268  |
| 96811_at   | 1339.7 | 1026.2 | 1064.4 | 936.5  | 905.8  | 1198.1 | 902.6  | 985.5  | 0.433307382 | 1091.7   | 998      | 93.7    | 1.093887776 | 0.4191   | -1.092 |
| 96812_at   | 541.1  | 503.6  | 762.5  | 743.4  | 666.4  | 648    | 646.2  | 676.9  | 0.768313293 | 637.65   | 659.375  | 21.725  | 0.967052133 | 0.6564   | 1.052  |
| 96813_f_at | 660.3  | 704.9  | 855.4  | 1114.6 | 821    | 671.9  | 846.4  | 983.3  | 0.980187874 | 833.8    | 830.65   | 3.15    | 1.003792211 | 0.9541   | 1.009  |
| 96814_r_at | 121.7  | 125.9  | 112.5  | 180.2  | 124.7  | 128.9  | 158.1  | 108.3  | 0.794055437 | 135.075  | 130      | 5.075   | 1.039038462 | 0.8255   | -1.031 |
| 96817_at   | 258.9  | 252.8  | 181.9  | 227.4  | 289.1  | 247.5  | 226.4  | 203.1  | 0.671474608 | 230.25   | 241.525  | 11.275  | 0.953317462 | 0.6729   | 1.05   |
| 96818_at   | 383.9  | 441.3  | 521.1  | 562.9  | 483.1  | 405.4  | 421.5  | 482    | 0.546160963 | 477.3    | 448      | 29.3    | 1.065401786 | 0.5875   | -1.057 |
| 96819_at   | 345.4  | 325.9  | 313.9  | 276.2  | 245.5  | 242.3  | 351.7  | 346    | 0.600812967 | 315.35   | 296.375  | 18.975  | 1.064023619 | 0.5351   | -1.078 |



|            |         |         |        |         |         |        |         |         |             |          |          |         |             |          |        |
|------------|---------|---------|--------|---------|---------|--------|---------|---------|-------------|----------|----------|---------|-------------|----------|--------|
| 96822_at   | 895.8   | 780.8   | 789.9  | 756.5   | 860.5   | 757.4  | 705.5   | 805.7   | 0.622703586 | 805.75   | 782.275  | 23.475  | 1.030008629 | 0.6123   | -1.031 |
| 96824_at   | 193     | 97.8    | 126    | 127.4   | 163     | 229.1  | 146.6   | 157.5   | 0.216272797 | 136.05   | 174.05   | 38      | 0.781671933 | 0.1797   | 1.299  |
| 96825_at   | 181.5   | 248.2   | 263.4  | 267.4   | 221.7   | 147.3  | 250.6   | 218.4   | 0.342335451 | 240.125  | 209.5    | 30.625  | 1.146181384 | 0.3662   | -1.154 |
| 96826_at   | 56.4    | 8.1     | 50     | 27.3    | 27.8    | 41.8   | 52.7    | 26.6    | 0.894386458 | 35.45    | 37.225   | 1.775   | 0.952316991 | 0.6302   | 1.272  |
| 96827_at   | 247.9   | 255.2   | 293.2  | 426.3   | 211.3   | 171    | 224.1   | 212     | 0.088639569 | 305.65   | 204.6    | 101.05  | 1.493890518 | 0.03267  | -1.465 |
| 96828_at   | 70.3    | 29.5    | 56.5   | 48.7    | 132.2   | 118.2  | 77.3    | 81.7    | 0.023717837 | 51.25    | 102.35   | 51.1    | 0.50073278  | 0.02031  | 2.038  |
| 96829_at   | 845.2   | 955.5   | 1167.9 | 1205.2  | 1131.4  | 853.3  | 923.3   | 1038.1  | 0.611542933 | 1043.45  | 986.525  | 56.925  | 1.057702542 | 0.6411   | -1.053 |
| 96831_at   | 441.8   | 570     | 529.1  | 553     | 739.4   | 460.3  | 592.2   | 497.7   | 0.512229886 | 523.475  | 572.4    | 48.925  | 0.914526555 | 0.543    | 1.08   |
| 96832_at   | 1249.8  | 1874.1  | 881.4  | 1267.2  | 1265.4  | 1400.7 | 1133.8  | 1090.5  | 0.684583352 | 1318.125 | 1222.6   | 95.525  | 1.078132668 | 0.7965   | -1.045 |
| 96833_at   | 168.9   | 194.2   | 248.5  | 310.1   | 170.2   | 175.6  | 266.4   | 252     | 0.733100303 | 230.425  | 216.05   | 14.375  | 1.066535524 | 0.7576   | -1.059 |
| 96834_at   | 2627.8  | 2799    | 3192.1 | 3802.9  | 2653.9  | 2341.6 | 2776.7  | 2966.2  | 0.216174677 | 3105.45  | 2684.6   | 420.85  | 1.156764509 | 0.1964   | -1.149 |
| 96835_at   | 132     | 74      | 142.8  | 154.8   | 15.2    | 168.8  | 114.5   | 95.1    | 0.487158003 | 125.9    | 98.4     | 27.5    | 1.279471545 | 0.3969   | -1.668 |
| 96836_r_at | 49.2    | 87.5    | 116.5  | 119.4   | 141.6   | 79.2   | 89      | 121.2   | 0.527910184 | 93.15    | 107.75   | 14.6    | 0.86450116  | 0.5023   | 1.192  |
| 96837_at   | 1052.9  | 952.2   | 1084.5 | 1038.7  | 859.2   | 1378.9 | 854     | 885.5   | 0.791495936 | 1032.075 | 994.4    | 37.675  | 1.037887168 | 0.6461   | -1.06  |
| 96838_at   | 661.7   | 578.4   | 587.2  | 512.9   | 544.1   | 660.8  | 496.2   | 501.4   | 0.509113205 | 585.05   | 550.625  | 34.425  | 1.062519864 | 0.481    | -1.065 |
| 96839_at   | 375.5   | 316.1   | 263    | 348.7   | 281.3   | 543    | 230.1   | 389.2   | 0.658923666 | 325.825  | 360.9    | 35.075  | 0.902812413 | 0.7887   | 1.059  |
| 96840_at   | 1635.2  | 1590.8  | 1363.8 | 1368.4  | 1588.2  | 1601   | 1378.9  | 1525.9  | 0.714563452 | 1489.55  | 1523.5   | 33.95   | 0.977715786 | 0.6959   | 1.025  |
| 96841_at   | 448.2   | 364.5   | 450.9  | 405.1   | 400.9   | 403.1  | 362.7   | 282.2   | 0.170894326 | 417.175  | 362.225  | 54.95   | 1.151701291 | 0.1807   | -1.159 |
| 96843_at   | 190.3   | 264.8   | 218.4  | 273.6   | 223.8   | 414.1  | 241.3   | 236.2   | 0.440646952 | 236.775  | 278.85   | 42.075  | 0.849112426 | 0.4332   | 1.151  |
| 96845_at   | 250.6   | 355.5   | 380.4  | 443.3   | 440.4   | 343.7  | 397.8   | 363     | 0.556624063 | 357.45   | 386.225  | 28.775  | 0.925496796 | 0.5052   | 1.098  |
| 96846_at   | 18.2    | 40.2    | 26.5   | 19      | 50      | 23.3   | 6.5     | 24.1    | 1           | 25.975   | 25.975   | 0       | 1           | 0.7188   | -1.19  |
| 96847_at   | 2338.7  | 2593.1  | 1991.2 | 1489.4  | 2248    | 2560.7 | 1700.6  | 1706.3  | 0.882732532 | 2103.1   | 2053.9   | 49.2    | 1.023954428 | 0.9108   | 1.019  |
| 96848_at   | 31.2    | 28.3    | 47.5   | 53.9    | 34.3    | 73     | 66.1    | 74.4    | 0.109398571 | 40.225   | 61.95    | 21.725  | 0.649313963 | 0.1298   | 1.529  |
| 96849_at   | 569.2   | 574.3   | 727.8  | 703     | 789.7   | 659.3  | 726     | 768.3   | 0.125075162 | 643.575  | 735.825  | 92.25   | 0.874630517 | 0.1208   | 1.148  |
| 96850_at   | 286.6   | 303.7   | 417.1  | 571.9   | 318.5   | 266    | 469.9   | 562.6   | 0.924003698 | 394.825  | 404.25   | 9.425   | 0.97668522  | 0.9383   | 1.019  |
| 96852_at   | 4561.5  | 4626    | 4780.7 | 5155.5  | 4437.4  | 3968.6 | 5563.8  | 5185.3  | 0.984704012 | 4780.925 | 4788.775 | 7.85    | 0.99836075  | 0.9446   | 1.006  |
| 96854_at   | 4217.5  | 4053    | 4063.3 | 3894.6  | 4070    | 5197.9 | 5188.6  | 4355.8  | 0.108931318 | 4057.1   | 4703.075 | 645.975 | 0.862648374 | 0.06848  | 1.153  |
| 96855_at   | 1463.7  | 1271    | 1463.2 | 1306.1  | 1542.3  | 1560.7 | 1555.4  | 1573.8  | 0.036409126 | 1376     | 1558.05  | 182.05  | 0.883155226 | 0.01496  | 1.135  |
| 96856_at   | 29.4    | 41.1    | 26.5   | 39.3    | 36.9    | 69.8   | 47.1    | 28.3    | 0.302129007 | 34.075   | 45.525   | 11.45   | 0.748489841 | 0.2989   | 1.285  |
| 96857_at   | 17.3    | 20.1    | 14.7   | 17.7    | 12.1    | 22.1   | 17.9    | 13      | 0.669979896 | 17.45    | 16.275   | 1.175   | 1.072196621 | 0.561    | -1.1   |
| 96858_at   | 2065.5  | 2008.5  | 1963.4 | 1974.3  | 2209.3  | 1967.7 | 2148.2  | 1797.8  | 0.788578136 | 2002.925 | 2030.75  | 27.825  | 0.986298166 | 0.8299   | 1.011  |
| 96859_at   | 4487.9  | 1739.7  | 3042.8 | 5284.6  | 1570    | 3886.3 | 4219    | 1798.3  | 0.488934439 | 3638.75  | 2868.4   | 770.35  | 1.268564356 | 0.5094   | -1.283 |
| 96861_at   | 526.9   | 422.5   | 554.7  | 595.7   | 402.2   | 578.6  | 659.5   | 611.2   | 0.595806251 | 524.95   | 562.875  | 37.925  | 0.932622696 | 0.6627   | 1.063  |
| 96862_at   | 2132.1  | 2641.1  | 2351   | 2641.3  | 2853.3  | 2498.6 | 2881.2  | 2875.1  | 0.076692998 | 2441.375 | 2777.05  | 335.675 | 0.879125331 | 0.08005  | 1.14   |
| 96864_at   | 205.4   | 201.5   | 236.5  | 268.8   | 311.5   | 271.4  | 216     | 359.8   | 0.138914186 | 228.05   | 289.675  | 61.625  | 0.787261586 | 0.1234   | 1.257  |
| 96865_at   | 2065.4  | 3024.8  | 3406.6 | 3643.9  | 2977    | 2258.2 | 3984.4  | 3474.2  | 0.79386957  | 3035.175 | 3173.45  | 138.275 | 0.956427547 | 0.8041   | 1.047  |
| 96866_at   | 28.5    | 64.4    | 31.9   | 112.2   | 119.3   | 38     | 46.9    | 86.8    | 0.635199169 | 59.25    | 72.75    | 13.5    | 0.81443299  | 0.5571   | 1.296  |
| 96867_at   | 69.1    | 7.4     | 51.1   | 18.3    | 49.4    | 175.9  | 61.5    | 65      | 0.186045658 | 36.475   | 87.95    | 51.475  | 0.414724275 | 0.1153   | 2.916  |
| 96868_at   | 4.6     | 6.9     | 2      | 2.5     | 1.7     | 4.8    | 3.5     | 15.3    | 0.516777271 | 4        | 6.325    | 2.325   | 0.632411067 | 0.6736   | 1.269  |
| 96869_at   | 4782    | 5291.3  | 4635.6 | 4421.4  | 4883.3  | 5273.1 | 5219.6  | 4102.5  | 0.800233478 | 4782.575 | 4869.625 | 87.05   | 0.98212388  | 0.8326   | 1.015  |
| 96870_at   | 4810.8  | 4449.8  | 3734.7 | 3189.4  | 4201.6  | 4402   | 3878.1  | 4049.9  | 0.831719325 | 4046.175 | 4132.9   | 86.725  | 0.979015945 | 0.7454   | 1.033  |
| 96871_at   | 532.7   | 488.9   | 619.8  | 488.8   | 607.5   | 521.8  | 505.6   | 527.2   | 0.842794989 | 532.55   | 540.525  | 7.975   | 0.985245826 | 0.8136   | 1.017  |
| 96872_at   | 2139.7  | 2012.5  | 1908.8 | 1900.8  | 1622    | 1959.2 | 1613.3  | 1909    | 0.103246694 | 1990.45  | 1775.875 | 214.575 | 1.120827761 | 0.09375  | -1.124 |
| 96873_at   | 376.2   | 285.9   | 318.1  | 391.5   | 272.3   | 375.2  | 337.1   | 350.8   | 0.793146869 | 342.925  | 333.85   | 9.075   | 1.027182867 | 0.8068   | 1.026  |
| 96874_g_at | 5138.7  | 6119.2  | 4855.6 | 5091.9  | 6054.6  | 5106.8 | 5351.3  | 5290.6  | 0.684053593 | 5301.35  | 5450.825 | 149.475 | 0.972577546 | 0.6534   | 1.03   |
| 96875_r_at | 121.9   | 111.7   | 153.2  | 178.3   | 183     | 162.7  | 149.2   | 134.8   | 0.416275397 | 141.275  | 157.425  | 16.15   | 0.897411466 | 0.3769   | 1.127  |
| 96876_at   | 13797.2 | 16039.1 | 12078  | 11488.5 | 12593.8 | 11494  | 12575.3 | 12510.7 | 0.382238486 | 13350.7  | 12293.45 | 1057.25 | 1.086001082 | 0.3747   | -1.078 |
| 96878_at   | 442.6   | 410.2   | 457.7  | 412.9   | 379.4   | 394    | 559.9   | 395.3   | 0.978199444 | 430.85   | 432.15   | 1.3     | 0.996991785 | 0.9263   | 1.009  |
| 96879_at   | 791     | 765.1   | 933.7  | 941.4   | 694.1   | 772.8  | 778.6   | 750     | 0.095806312 | 857.8    | 748.875  | 108.925 | 1.145451511 | 0.07071  | -1.142 |
| 96881_at   | 898.7   | 941.4   | 893.6  | 899.7   | 954.7   | 935    | 951.9   | 904.2   | 0.130671847 | 908.35   | 936.45   | 28.1    | 0.969993059 | 0.1295   | 1.031  |
| 96882_at   | 3527.9  | 4663.1  | 4038.4 | 4342.4  | 5081.6  | 3064   | 3686.6  | 3881.1  | 0.678206848 | 4142.95  | 3928.325 | 214.625 | 1.054635245 | 0.6103   | -1.067 |
| 96883_at   | 4668.9  | 4545.6  | 3694.3 | 3272.8  | 4166.3  | 3545.2 | 3126.7  | 3376.1  | 0.274784773 | 4045.4   | 3553.575 | 491.825 | 1.138402876 | 0.2781   | -1.133 |
| 96884_at   | 1180    | 1036    | 1097.6 | 1010.4  | 834.9   | 964.7  | 826.4   | 887.8   | 0.006717131 | 1081     | 878.45   | 202.55  | 1.230576584 | 0.005744 | -1.231 |
| 96885_at   | 1762.9  | 1792.1  | 1772.1 | 1745.1  | 1826.2  | 1968.3 | 1941    | 2124.5  | 0.047312396 | 1768.05  | 1965     | 196.95  | 0.899770992 | 0.01643  | 1.11   |
| 96886_at   | 172.2   | 141.1   | 161.9  | 244.7   | 153.5   | 185.6  | 234.8   | 176     | 0.800535736 | 179.975  | 187.475  | 7.5     | 0.959994666 | 0.7434   | 1.052  |
| 96887_at   | 4052.2  | 5188.7  | 3522.5 | 3122.6  | 4589.2  | 3734.3 | 3124.3  | 3427.7  | 0.662929896 | 3971.5   | 3718.875 | 252.625 | 1.06793049  | 0.6866   | -1.06  |



|            |        |         |        |        |        |        |        |        |             |          |          |         |             |         |        |
|------------|--------|---------|--------|--------|--------|--------|--------|--------|-------------|----------|----------|---------|-------------|---------|--------|
| 96888_at   | 8725.5 | 10730.8 | 7943.7 | 7820.1 | 9929.9 | 9602.6 | 9739.5 | 8938.3 | 0.355415942 | 8805.025 | 9552.575 | 747.55  | 0.921743614 | 0.2882  | 1.093  |
| 96890_at   | 906.5  | 1040.8  | 862.7  | 757.8  | 1196.5 | 921.7  | 1010.2 | 1038.4 | 0.117440429 | 891.95   | 1041.7   | 149.75  | 0.8562446   | 0.1136  | 1.17   |
| 96891_at   | 3704   | 3499.4  | 3782.8 | 3886   | 3286.9 | 3097.9 | 3528.8 | 3539.2 | 0.040296301 | 3718.05  | 3363.2   | 354.85  | 1.105509634 | 0.04066 | -1.106 |
| 96892_at   | 788    | 925.7   | 740.6  | 882.7  | 922.9  | 758.1  | 853.1  | 796.1  | 0.976620133 | 834.25   | 832.55   | 1.7     | 1.002041919 | 0.9892  | 1.001  |
| 96894_at   | 2096.5 | 2068.5  | 1736.1 | 1593.3 | 2120.8 | 1932.8 | 1783.3 | 1770.6 | 0.85640593  | 1873.6   | 1901.875 | 28.275  | 0.985133092 | 0.819   | 1.019  |
| 96895_at   | 67.6   | 44      | 27.5   | 45.3   | 30.9   | 16.4   | 10.9   | 11     | 0.030635547 | 46.1     | 17.3     | 28.8    | 2.664739884 | 0.01537 | -2.8   |
| 96896_at   | 2020.8 | 1677.9  | 2085.7 | 2155.3 | 1871.7 | 1797.6 | 2927.5 | 2633.6 | 0.344056751 | 1984.925 | 2307.6   | 322.675 | 0.860168573 | 0.3601  | 1.142  |
| 96898_at   | 221.5  | 163.3   | 160.2  | 128.6  | 143    | 254.8  | 206.6  | 188.4  | 0.362373995 | 168.4    | 198.2    | 29.8    | 0.849646821 | 0.3635  | 1.175  |
| 96899_at   | 2672.5 | 2832.5  | 2553   | 2386.5 | 2858   | 2450.8 | 2357.3 | 2812.6 | 0.958629685 | 2611.125 | 2619.675 | 8.55    | 0.996736236 | 0.9783  | -1.002 |
| 96900_at   | 8255.4 | 8496.2  | 7778.6 | 7503.9 | 7604.6 | 5881.6 | 6548.1 | 6067.8 | 0.022187052 | 8008.525 | 6525.525 | 1483    | 1.227261408 | 0.01705 | -1.232 |
| 96902_at   | 699.3  | 911.7   | 726.9  | 875    | 772.7  | 736.1  | 769.6  | 826.9  | 0.658276171 | 803.225  | 776.325  | 26.9    | 1.034650436 | 0.6999  | -1.029 |
| 96904_at   | 818.8  | 653.9   | 608.2  | 500.6  | 804.9  | 517.1  | 479.2  | 583.6  | 0.63515096  | 645.375  | 596.2    | 49.175  | 1.082480711 | 0.6015  | -1.088 |
| 96905_at   | 20.1   | 20.8    | 23.1   | 30.4   | 17.1   | 42.5   | 44.3   | 43.4   | 0.136242531 | 23.6     | 36.825   | 13.225  | 0.640868975 | 0.1712  | 1.478  |
| 96906_at   | 5.8    | 3.6     | 3.1    | 0.8    | 3.4    | 4.5    | 2.2    | 2.3    | 0.854483366 | 3.325    | 3.1      | 0.225   | 1.072580645 | 0.8349  | 1.104  |
| 96907_at   | 230.6  | 349.8   | 523.6  | 576.9  | 354.2  | 208    | 390.2  | 419    | 0.441743642 | 420.225  | 342.85   | 77.375  | 1.225681785 | 0.5282  | -1.193 |
| 96908_at   | 79.7   | 69.3    | 29.6   | 40.4   | 33.6   | 98.5   | 44.4   | 40     | 0.974953862 | 54.75    | 54.125   | 0.625   | 1.011547344 | 0.9346  | 1.029  |
| 96909_at   | 2967.7 | 3852.6  | 2735.3 | 2862.2 | 3347.5 | 2642.5 | 3293.7 | 3098.5 | 0.977481485 | 3104.45  | 3095.55  | 8.9     | 1.002875095 | 0.9828  | 1.002  |
| 96910_at   | 99.1   | 71.1    | 72.4   | 94.6   | 59.8   | 92.9   | 97.3   | 165.1  | 0.453864599 | 84.3     | 103.775  | 19.475  | 0.812334377 | 0.5198  | 1.167  |
| 96911_at   | 2937.3 | 3407.5  | 3173.6 | 3258.7 | 2643.8 | 2334.9 | 2839.5 | 2789.7 | 0.011629535 | 3194.275 | 2651.975 | 542.3   | 1.204489107 | 0.01333 | -1.206 |
| 96912_s_at | 271    | 396.7   | 271.1  | 293.9  | 396.2  | 366.6  | 328.3  | 360    | 0.170106562 | 308.175  | 362.775  | 54.6    | 0.849493488 | 0.1278  | 1.19   |
| 96913_at   | 2996.2 | 2883.1  | 2738.2 | 2283.7 | 2930.6 | 3031.6 | 2386.9 | 2328.3 | 0.823307592 | 2725.3   | 2669.35  | 55.95   | 1.020960159 | 0.8129  | -1.023 |
| 96915_f_at | 4866.3 | 4911.1  | 3501.4 | 3416.3 | 4435.1 | 4275.1 | 3897.6 | 3724.6 | 0.848555998 | 4173.775 | 4083.1   | 90.675  | 1.022207391 | 0.9328  | 1.01   |
| 96916_at   | 488.5  | 514.9   | 516.3  | 588.2  | 587.1  | 649.5  | 473.3  | 669.6  | 0.23347314  | 526.975  | 594.875  | 67.9    | 0.885858374 | 0.2396  | 1.122  |
| 96917_at   | 1102.3 | 766     | 928.1  | 866.9  | 924.2  | 1001.5 | 758.7  | 875.3  | 0.776933029 | 915.825  | 889.925  | 25.9    | 1.029103576 | 0.8026  | -1.025 |
| 96918_at   | 12.6   | 11.4    | 32.8   | 19.1   | 25.2   | 43.6   | 30.4   | 38.9   | 0.052889725 | 18.975   | 34.525   | 15.55   | 0.549601738 | 0.04863 | 1.95   |
| 96919_at   | 7206.6 | 5199.7  | 5410.4 | 4449   | 5606.6 | 6137.1 | 6263.5 | 5096.3 | 0.760077583 | 5566.425 | 5775.875 | 209.45  | 0.963737096 | 0.6733  | 1.05   |
| 96920_at   | 2674.5 | 2426.1  | 2428.6 | 2543.9 | 2998.7 | 2722   | 2625.4 | 2530   | 0.149039384 | 2518.275 | 2719.025 | 200.75  | 0.926168388 | 0.1313  | 1.078  |
| 96921_at   | 266.2  | 399.2   | 322.8  | 272.8  | 442.6  | 323.7  | 413.3  | 327.1  | 0.203758524 | 315.25   | 376.675  | 61.425  | 0.836928387 | 0.1906  | 1.199  |
| 96924_at   | 1187.3 | 1609.2  | 1442.5 | 1325.7 | 1295.4 | 1618.8 | 1521   | 1289   | 0.75451439  | 1391.175 | 1431.05  | 39.875  | 0.972135844 | 0.7444  | 1.03   |
| 96925_at   | 1262.7 | 1252.1  | 1105.4 | 1089.5 | 1041.4 | 1144.4 | 1267.1 | 1105.8 | 0.590059067 | 1177.425 | 1139.675 | 37.75   | 1.033123478 | 0.5854  | -1.033 |
| 96926_at   | 2272.6 | 2228.4  | 2313.2 | 2219.8 | 2047.9 | 2041.7 | 2809.1 | 2847.2 | 0.489815807 | 2258.5   | 2436.475 | 177.975 | 0.926953899 | 0.5291  | 1.065  |
| 96929_at   | 34.3   | 32.3    | 5.2    | 23.1   | 27.6   | 36.1   | 8      | 15.1   | 0.832020691 | 23.725   | 21.7     | 2.025   | 1.093317972 | 0.9636  | 1.027  |
| 96930_at   | 195.2  | 239     | 280.6  | 293.2  | 216.1  | 234    | 212.8  | 248.8  | 0.369790015 | 252      | 227.925  | 24.075  | 1.105626851 | 0.3984  | -1.094 |
| 96931_at   | 17.7   | 38      | 18.5   | 22.5   | 11.4   | 25.9   | 66.1   | 16.3   | 0.688544444 | 24.175   | 29.925   | 5.75    | 0.807852966 | 0.9426  | 1.032  |
| 96932_at   | 269.9  | 246.3   | 204.7  | 185.1  | 157.9  | 206.4  | 197.5  | 179.1  | 0.124214889 | 226.5    | 185.225  | 41.275  | 1.22283709  | 0.1101  | -1.216 |
| 96934_at   | 1452.7 | 1985    | 1465.6 | 1354.8 | 1746   | 1689.2 | 1561.9 | 1330.1 | 0.922738211 | 1564.525 | 1581.8   | 17.275  | 0.989078897 | 0.8765  | 1.017  |
| 96935_at   | 232.7  | 225.5   | 160.8  | 218.3  | 225.9  | 244.3  | 194.2  | 162.2  | 0.91641128  | 209.325  | 206.65   | 2.675   | 1.012944592 | 0.911   | -1.015 |
| 96936_at   | 1405   | 1175.1  | 1134.1 | 1146.2 | 1300.7 | 1266.9 | 1293   | 1129.7 | 0.684287116 | 1215.1   | 1247.575 | 32.475  | 0.973969501 | 0.6505  | 1.029  |
| 96937_at   | 26.5   | 24.5    | 8.3    | 13.5   | 8      | 10.1   | 6.6    | 15.9   | 0.165973945 | 18.2     | 10.15    | 8.05    | 1.793103448 | 0.1559  | -1.716 |
| 96938_at   | 25.1   | 20.3    | 9.2    | 6.3    | 22.9   | 52.4   | 16.7   | 27.6   | 0.167123311 | 15.225   | 29.9     | 14.675  | 0.509197324 | 0.1214  | 2.08   |
| 96939_at   | 1276.6 | 1219.2  | 844.2  | 933.6  | 929.5  | 1092.4 | 954.9  | 901.1  | 0.435418989 | 1068.4   | 969.475  | 98.925  | 1.102039764 | 0.4672  | -1.089 |
| 96940_at   | 351.8  | 371     | 399.2  | 402.9  | 375.9  | 381.6  | 352.5  | 368.5  | 0.438618895 | 381.225  | 369.625  | 11.6    | 1.031383159 | 0.4442  | -1.03  |
| 96941_at   | 1625.2 | 1796.4  | 1212.4 | 916.8  | 1413.9 | 1485.4 | 983.8  | 1048.6 | 0.540470745 | 1387.7   | 1232.925 | 154.775 | 1.125534805 | 0.603   | -1.106 |
| 96942_at   | 7125.2 | 7383.9  | 5659.8 | 4663.3 | 6900.7 | 6816.1 | 5353.6 | 5540.5 | 0.944704062 | 6208.05  | 6152.725 | 55.325  | 1.008991951 | 0.993   | 1.001  |
| 96943_at   | 4192.1 | 3692.8  | 2827.1 | 2814.7 | 3254.4 | 3430.7 | 3100.5 | 3142.2 | 0.693198737 | 3381.675 | 3231.95  | 149.725 | 1.046326521 | 0.7705  | 1.032  |
| 96945_at   | 130.4  | 178.7   | 252.1  | 228.6  | 177.2  | 196.6  | 199.1  | 202.3  | 0.902780401 | 197.45   | 193.8    | 3.65    | 1.018833849 | 0.9443  | 1.011  |
| 96946_at   | 380.6  | 469.2   | 455.2  | 414.6  | 362    | 681.5  | 465.6  | 354.8  | 0.67458533  | 429.9    | 465.975  | 36.075  | 0.922581684 | 0.7757  | 1.049  |
| 96947_at   | 1828.8 | 1805.8  | 1505.3 | 1053.6 | 2004.5 | 1498.4 | 1438.2 | 1390.5 | 0.885824653 | 1548.375 | 1582.9   | 34.525  | 0.978188767 | 0.8308  | 1.035  |
| 96948_at   | 2867.1 | 2481.1  | 2837.5 | 2304.2 | 2168.4 | 2857.2 | 2301.6 | 2533.2 | 0.470431716 | 2622.475 | 2465.1   | 157.375 | 1.063841223 | 0.4615  | -1.065 |
| 96949_at   | 1540.8 | 1589.2  | 2148.3 | 2173   | 1684.5 | 1581.1 | 1678.6 | 1993   | 0.540275255 | 1862.825 | 1734.3   | 128.525 | 1.074107709 | 0.5777  | -1.064 |
| 96950_at   | 318.8  | 246.6   | 233.2  | 262.5  | 247.3  | 375    | 263    | 320.6  | 0.343288234 | 265.275  | 301.475  | 36.2    | 0.879923708 | 0.3397  | 1.129  |
| 96951_at   | 892.2  | 1215.4  | 1242.6 | 1195.7 | 1410.7 | 1194.6 | 1267.4 | 1182.5 | 0.246614495 | 1136.475 | 1263.8   | 127.325 | 0.899252255 | 0.2489  | 1.119  |
| 96952_at   | 5160.9 | 6395.1  | 4900   | 4579.6 | 5301.5 | 4686.3 | 5010.6 | 5309.6 | 0.690700341 | 5258.9   | 5077     | 181.9   | 1.035828245 | 0.7275  | -1.029 |
| 96953_at   | 66.5   | 43      | 60.3   | 43.1   | 41.9   | 81.7   | 34.4   | 55.4   | 0.992115592 | 53.225   | 53.35    | 0.125   | 0.997656982 | 0.8891  | -1.032 |
| 96954_at   | 553.2  | 627.8   | 669.5  | 710.3  | 372.8  | 731.5  | 769.9  | 531.9  | 0.715124381 | 640.2    | 601.525  | 38.675  | 1.064294917 | 0.5982  | -1.103 |
| 96955_at   | 1651.8 | 1323    | 1106.7 | 872.5  | 1019.6 | 1405.5 | 1115.6 | 1028   | 0.633095677 | 1238.5   | 1142.175 | 96.325  | 1.084334712 | 0.7     | -1.065 |



|            |         |         |         |         |         |         |         |         |             |           |           |        |             |         |        |
|------------|---------|---------|---------|---------|---------|---------|---------|---------|-------------|-----------|-----------|--------|-------------|---------|--------|
| 96956_at   | 3575.5  | 3127.5  | 2891.6  | 2418.6  | 3051.8  | 2785.2  | 2987.7  | 2714.5  | 0.667324805 | 3003.3    | 2884.8    | 118.5  | 1.041077371 | 0.727   | -1.032 |
| 96957_at   | 435     | 378.7   | 276.3   | 354.8   | 297.2   | 425.9   | 324.5   | 362.3   | 0.846563352 | 361.2     | 352.475   | 8.725  | 1.024753529 | 0.8728  | -1.021 |
| 96958_at   | 11      | 10.8    | 4       | 7.5     | 1.9     | 16.4    | 10.8    | 9       | 0.740607989 | 8.325     | 9.525     | 1.2    | 0.874015748 | 0.946   | -1.038 |
| 96959_at   | 2262.1  | 2482.4  | 2858.7  | 2902.5  | 2761.9  | 2638.7  | 2573    | 2706.6  | 0.799678174 | 2626.425  | 2670.05   | 43.625 | 0.983661355 | 0.7404  | -1.022 |
| 96961_at   | 171.8   | 165.1   | 107.4   | 197.5   | 127.9   | 246.1   | 253.2   | 292.4   | 0.150343435 | 160.45    | 229.9     | 69.45  | 0.697912136 | 0.1855  | 1.403  |
| 96962_at   | 14673.1 | 16978.6 | 10621.8 | 11302.8 | 13004.4 | 12093.1 | 12396.9 | 13146.5 | 0.658208453 | 13394.075 | 12660.225 | 733.85 | 1.057965005 | 0.742   | -1.039 |
| 96963_s_at | 180     | 90.6    | 101.4   | 131.1   | 112.2   | 201.7   | 134.3   | 127.3   | 0.544103016 | 125.775   | 143.875   | 18.1   | 0.874196351 | 0.4925  | 1.156  |
| 96964_at   | 8.3     | 5.3     | 2.7     | 4.3     | 2       | 5.3     | 3.9     | 2.3     | 0.2607423   | 5.15      | 3.375     | 1.775  | 1.525925926 | 0.2472  | -1.516 |
| 96965_at   | 33.2    | 31.6    | 24.3    | 54.1    | 33      | 55.2    | 34.2    | 28      | 0.844458686 | 35.8      | 37.6      | 1.8    | 0.95212766  | 0.8027  | 1.06   |
| 96966_at   | 31.2    | 25.8    | 9.4     | 2.7     | 7.5     | 14.3    | 4.3     | 4.6     | 0.253197208 | 17.275    | 7.675     | 9.6    | 2.250814332 | 0.4036  | -1.759 |
| 96967_at   | 8.9     | 7.5     | 7.1     | 9.3     | 11.6    | 36.3    | 32.7    | 8.5     | 0.142418234 | 8.2       | 22.275    | 14.075 | 0.368125701 | 0.06807 | 2.277  |
| 96968_at   | 212.6   | 157.9   | 140.3   | 171.6   | 149.9   | 263.2   | 162.3   | 176.9   | 0.584829847 | 170.6     | 188.075   | 17.475 | 0.90708494  | 0.5996  | 1.088  |
| 96969_at   | 35.9    | 22.1    | 10.7    | 18.3    | 18.4    | 66.3    | 20      | 7.1     | 0.683653488 | 21.75     | 27.95     | 6.2    | 0.778175313 | 0.9586  | 1.029  |
| 96970_at   | 19.4    | 67      | 16.1    | 14      | 14.3    | 83.5    | 15.6    | 47.1    | 0.614825739 | 29.125    | 40.125    | 11     | 0.725856698 | 0.639   | 1.319  |
| 96971_f_at | 76.9    | 67      | 38.3    | 59      | 78.5    | 104     | 64.4    | 64.7    | 0.206251378 | 60.3      | 77.9      | 17.6   | 0.77406932  | 0.2045  | 1.307  |
| 96972_f_at | 257.9   | 198.4   | 162.6   | 227     | 148.9   | 274.3   | 239.2   | 200.8   | 0.902370127 | 211.475   | 215.8     | 4.325  | 0.979958295 | 0.9563  | 1.009  |
| 96973_f_at | 9.2     | 6.4     | 14.8    | 16.3    | 13.9    | 10.9    | 24.4    | 30.5    | 0.175035482 | 11.675    | 19.925    | 8.25   | 0.585947302 | 0.1608  | 1.677  |
| 96974_at   | 59      | 30.9    | 28.8    | 20.1    | 16.1    | 25.8    | 26      | 38.6    | 0.441806233 | 34.7      | 26.625    | 8.075  | 1.303286385 | 0.4492  | -1.261 |
| 96975_at   | 204     | 131.5   | 127.3   | 213     | 126.9   | 191.1   | 157.1   | 112.2   | 0.473768386 | 168.95    | 146.825   | 22.125 | 1.150689596 | 0.4916  | -1.142 |
| 96976_f_at | 166     | 102.8   | 93.3    | 118     | 73.2    | 168.6   | 113.3   | 124.6   | 0.996991918 | 120.025   | 119.925   | 0.1    | 1.000833854 | 0.9333  | 1.019  |
| 96977_at   | 53.5    | 28.8    | 53.2    | 87.7    | 48.5    | 123.4   | 27      | 63.7    | 0.698487411 | 55.8      | 65.65     | 9.85   | 0.849961919 | 0.8262  | 1.093  |
| 96978_at   | 1106.3  | 973.1   | 948.1   | 1047.7  | 1266.2  | 1147.4  | 1110.1  | 1111.9  | 0.03461507  | 1018.8    | 1158.9    | 140.1  | 0.8791095   | 0.03288 | 1.138  |
| 96979_at   | 3.6     | 5.7     | 3.9     | 7.2     | 7.1     | 5.3     | 9       | 3.9     | 0.414052361 | 5.1       | 6.325     | 1.225  | 0.806324111 | 0.4139  | 1.235  |
| 96980_at   | 39.2    | 16.4    | 34.2    | 35.8    | 29.3    | 33.2    | 49.6    | 11.5    | 0.959318356 | 31.4      | 30.9      | 0.5    | 1.01618123  | 0.8182  | -1.093 |
| 96981_at   | 60.2    | 34.8    | 47.1    | 44.5    | 54.9    | 99.2    | 40.9    | 77      | 0.197434715 | 46.65     | 68        | 21.35  | 0.686029412 | 0.179   | 1.406  |
| 96982_g_at | 7.7     | 8.1     | 6       | 6.5     | 4.5     | 7.8     | 7.8     | 8.5     | 0.944727178 | 7.075     | 7.15      | 0.075  | 0.98951049  | 0.9488  | -1.011 |
| 96983_at   | 30.5    | 23.4    | 15.6    | 17.4    | 16.4    | 34.4    | 17.2    | 9.6     | 0.725470475 | 21.725    | 19.4      | 2.325  | 1.119845361 | 0.5659  | -1.202 |
| 96984_at   | 114.9   | 66.1    | 57.9    | 95.6    | 80.3    | 90.2    | 68.1    | 60.1    | 0.574326102 | 83.625    | 74.675    | 8.95   | 1.119852695 | 0.6481  | -1.092 |
| 96985_at   | 92.6    | 72.2    | 58.3    | 76.5    | 63.6    | 154     | 72.5    | 66.4    | 0.570156745 | 74.9      | 89.125    | 14.225 | 0.840392707 | 0.6341  | 1.122  |
| 96986_at   | 255.8   | 284.7   | 251     | 298.2   | 175     | 248.5   | 317.4   | 271.8   | 0.579046457 | 272.425   | 253.175   | 19.25  | 1.076034364 | 0.5082  | -1.098 |
| 96987_at   | 790.7   | 570     | 680     | 721.6   | 520     | 838.8   | 636.2   | 569.9   | 0.581055513 | 690.575   | 641.225   | 49.35  | 1.076962065 | 0.5257  | -1.087 |
| 96992_r_at | 12.1    | 7.5     | 7.2     | 23.4    | 5.5     | 12.6    | 33.5    | 5.9     | 0.819964647 | 12.55     | 14.375    | 1.825  | 0.873043478 | 0.9653  | -1.023 |
| 96993_at   | 135.4   | 183.2   | 120.4   | 133.9   | 138.6   | 225.4   | 121     | 163.2   | 0.511825815 | 143.225   | 162.05    | 18.825 | 0.883832151 | 0.5271  | 1.115  |
| 96994_at   | 81.3    | 48.5    | 77.5    | 44.8    | 33.5    | 49.7    | 45.3    | 33.6    | 0.09438721  | 63.025    | 40.525    | 22.5   | 1.555212832 | 0.06292 | -1.525 |
| 96995_at   | 8.4     | 20.7    | 5.6     | 15.5    | 3       | 5.5     | 15      | 4.5     | 0.253405749 | 12.55     | 7         | 5.55   | 1.792857143 | 0.1988  | -1.923 |
| 96996_at   | 76.3    | 83.6    | 41.9    | 68.7    | 50.6    | 96.5    | 104.5   | 93.9    | 0.266045336 | 67.625    | 86.375    | 18.75  | 0.7829233   | 0.3316  | 1.272  |
| 96997_at   | 24      | 16.7    | 18.1    | 19.8    | 14      | 33.2    | 24.6    | 30.1    | 0.268534968 | 19.65     | 25.475    | 5.825  | 0.771344455 | 0.3351  | 1.244  |
| 96998_at   | 50.5    | 22.1    | 49.2    | 62.5    | 37.9    | 28.6    | 80.6    | 51.3    | 0.812689055 | 46.075    | 49.6      | 3.525  | 0.928931452 | 0.8404  | 1.069  |
| 96999_at   | 11.1    | 20.5    | 25      | 34.4    | 9.5     | 61.9    | 45.7    | 50.3    | 0.194376555 | 22.75     | 41.85     | 19.1   | 0.543608124 | 0.3667  | 1.619  |
| 97000_s_at | 108     | 41.9    | 58.1    | 105.7   | 80.2    | 104.8   | 92.2    | 52.4    | 0.850992233 | 78.425    | 82.4      | 3.975  | 0.951759709 | 0.7448  | 1.099  |
| 97001_r_at | 84.2    | 50.3    | 12.5    | 44.7    | 59.8    | 115     | 24.5    | 57.2    | 0.523306313 | 47.925    | 64.125    | 16.2   | 0.747368421 | 0.5201  | 1.421  |
| 97002_f_at | 338.4   | 182.1   | 247     | 287.6   | 158.4   | 368.7   | 249.1   | 254.1   | 0.913032541 | 263.775   | 257.575   | 6.2    | 1.024070659 | 0.8522  | -1.043 |
| 97003_at   | 62.8    | 24.9    | 7.7     | 37.3    | 14.2    | 54.6    | 26.1    | 21.4    | 0.788699986 | 33.175    | 29.075    | 4.1    | 1.141014617 | 0.9885  | 1.008  |
| 97004_at   | 839.4   | 825.7   | 712.9   | 739.8   | 755.4   | 1145.4  | 681.4   | 839.3   | 0.520199149 | 779.45    | 855.375   | 75.925 | 0.911237761 | 0.5492  | 1.079  |
| 97005_at   | 179.1   | 161     | 115.6   | 116.7   | 103.5   | 132     | 89.4    | 127.5   | 0.172709825 | 143.1     | 113.1     | 30     | 1.265251989 | 0.1644  | -1.257 |
| 97006_s_at | 57.6    | 30.9    | 58.7    | 36      | 25      | 60.4    | 35.3    | 25.2    | 0.430387279 | 45.8      | 36.475    | 9.325  | 1.255654558 | 0.3683  | -1.293 |
| 97007_at   | 94.4    | 58.8    | 10.6    | 67      | 56.6    | 121.1   | 64.2    | 56.9    | 0.49491157  | 57.7      | 74.7      | 17     | 0.772423025 | 0.41    | 1.587  |
| 97008_f_at | 3.9     | 9.5     | 2.4     | 3.4     | 7.4     | 25.7    | 10.9    | 13.6    | 0.089463709 | 4.8       | 14.4      | 9.6    | 0.333333333 | 0.0278  | 3.095  |
| 97009_f_at | 6.1     | 7.7     | 5.5     | 6.5     | 5.1     | 6.6     | 5.8     | 22.2    | 0.460425067 | 6.45      | 9.925     | 3.475  | 0.649874055 | 0.5163  | 1.27   |
| 97010_at   | 19.8    | 26.1    | 20.7    | 22.5    | 20.4    | 30.8    | 23.8    | 22.6    | 0.457882798 | 22.275    | 24.4      | 2.125  | 0.912909836 | 0.4625  | 1.087  |
| 97012_f_at | 244.9   | 290     | 172.1   | 182     | 239     | 174.2   | 156.7   | 231.9   | 0.553104447 | 222.25    | 200.45    | 21.8   | 1.108755301 | 0.5741  | -1.101 |
| 97013_f_at | 385.4   | 514.6   | 331.8   | 385.9   | 429.8   | 313.9   | 319.5   | 375.7   | 0.386446253 | 404.425   | 359.725   | 44.7   | 1.124261589 | 0.3772  | -1.119 |
| 97017_f_at | 645.5   | 561.1   | 580.9   | 642.1   | 571.6   | 632.8   | 642.2   | 617.7   | 0.755747329 | 607.4     | 616.075   | 8.675  | 0.985918922 | 0.7437  | 1.015  |
| 97048_at   | 4.5     | 4.8     | 2.7     | 3.8     | 3.8     | 10.8    | 3.4     | 6.8     | 0.283459639 | 3.95      | 6.2       | 2.25   | 0.637096774 | 0.2679  | 1.44   |
| 97049_at   | 2.8     | 2.5     | 3.3     | 3.9     | 3       | 3.7     | 2.9     | 4.6     | 0.428131095 | 3.125     | 3.55      | 0.425  | 0.88028169  | 0.4474  | 1.121  |
| 97052_at   | 16      | 13      | 13.8    | 11.6    | 11.7    | 9.9     | 8.3     | 9       | 0.017808702 | 13.6      | 9.725     | 3.875  | 1.398457584 | 0.01523 | -1.399 |



|            |        |        |        |        |        |        |        |        |             |         |          |         |             |         |        |
|------------|--------|--------|--------|--------|--------|--------|--------|--------|-------------|---------|----------|---------|-------------|---------|--------|
| 97053_at   | 92.8   | 105.6  | 112.8  | 144.7  | 101    | 149.3  | 146.5  | 124.3  | 0.34099874  | 113.975 | 130.275  | 16.3    | 0.874880061 | 0.3385  | 1.145  |
| 97054_at   | 218.7  | 132.1  | 144.3  | 188.8  | 151.1  | 231.4  | 99     | 137.1  | 0.652681058 | 170.975 | 154.65   | 16.325  | 1.105560944 | 0.5695  | -1.135 |
| 97055_s_at | 9062.1 | 9609.9 | 7605   | 8549.6 | 9088.2 | 9259.9 | 9917.3 | 8812.6 | 0.303193236 | 8706.65 | 9269.5   | 562.85  | 0.939279357 | 0.286   | 1.068  |
| 97058_f_at | 955.7  | 798.6  | 787.3  | 682.2  | 885.7  | 889.6  | 752    | 783.5  | 0.756683755 | 805.95  | 827.7    | 21.75   | 0.973722363 | 0.715   | 1.032  |
| 97060_at   | 355.6  | 280    | 321.2  | 363.7  | 366.7  | 420.7  | 322    | 358.8  | 0.234141528 | 330.125 | 367.05   | 36.925  | 0.899400627 | 0.2359  | 1.113  |
| 97061_g_at | 7293.9 | 8688   | 7062.5 | 7169   | 8484.3 | 7230.8 | 7613.4 | 7922   | 0.598981449 | 7553.35 | 7812.625 | 259.275 | 0.966813331 | 0.5673  | 1.036  |
| 97073_at   | 11.5   | 2.3    | 2.1    | 3.8    | 7.5    | 2.5    | 1.2    | 1.8    | 0.554436235 | 4.925   | 3.25     | 1.675   | 1.515384615 | 0.4862  | -1.508 |
| 97077_f_at | 2358.1 | 2062.2 | 2552.3 | 1794.8 | 2170.6 | 1752.5 | 2033.9 | 2508.1 | 0.75232194  | 2191.85 | 2116.275 | 75.575  | 1.035711332 | 0.7586  | 1.035  |
| 97080_at   | 97.6   | 71.6   | 25.8   | 48.5   | 52.5   | 105.2  | 53.7   | 59.4   | 0.743698068 | 60.875  | 67.7     | 6.825   | 0.899187592 | 0.6157  | 1.191  |
| 97082_at   | 98.9   | 161.2  | 159    | 128.2  | 154.1  | 183.9  | 146.8  | 187.6  | 0.138268351 | 136.825 | 168.1    | 31.275  | 0.81395003  | 0.1437  | 1.245  |
| 97083_at   | 139.5  | 153.9  | 108.8  | 137.9  | 157.7  | 117.9  | 187.5  | 200.2  | 0.201270274 | 135.025 | 165.825  | 30.8    | 0.814262023 | 0.2143  | 1.213  |
| 97084_at   | 16.1   | 13.2   | 6.8    | 8.9    | 5.8    | 19.8   | 11.8   | 3.3    | 0.809823379 | 11.25   | 10.175   | 1.075   | 1.105651106 | 0.5723  | -1.298 |
| 97085_at   | 41.5   | 12.1   | 52.7   | 33.1   | 13.1   | 48.5   | 73.9   | 18.7   | 0.831700409 | 34.85   | 38.55    | 3.7     | 0.904020752 | 1       | 1      |
| 97086_i_at | 16.6   | 16.7   | 11.6   | 24.2   | 10.2   | 25.2   | 14.2   | 22.7   | 0.861577796 | 17.275  | 18.075   | 0.8     | 0.955739972 | 0.9566  | 1.015  |
| 97087_f_at | 5.4    | 3.3    | 11.5   | 4.4    | 4.3    | 2.9    | 4.9    | 7.6    | 0.58398488  | 6.15    | 4.925    | 1.225   | 1.248730964 | 0.6335  | -1.182 |
| 97088_at   | 3.6    | 11.1   | 7.1    | 6.2    | 4      | 10.5   | 5.8    | 9.6    | 0.835497684 | 7       | 7.475    | 0.475   | 0.936454849 | 0.8378  | 1.071  |
| 97089_at   | 4.9    | 20.5   | 6.3    | 1.8    | 14.6   | 35.4   | 37.5   | 41     | 0.020017212 | 8.375   | 32.125   | 23.75   | 0.260700389 | 0.02512 | 5.124  |
| 97090_at   | 48.9   | 74.1   | 66.5   | 70.7   | 24.2   | 83.4   | 67.9   | 64.3   | 0.729928131 | 65.05   | 59.95    | 5.1     | 1.085070892 | 0.5924  | -1.179 |
| 97091_at   | 154.3  | 106.1  | 104.8  | 153.4  | 108.7  | 128.2  | 163    | 153.1  | 0.660358629 | 129.65  | 138.25   | 8.6     | 0.937793852 | 0.6432  | 1.072  |
| 97092_at   | 58.6   | 161.3  | 101.7  | 151.6  | 154.7  | 58.1   | 126.9  | 171.9  | 0.790473778 | 118.3   | 127.9    | 9.6     | 0.92494136  | 0.8328  | 1.077  |
| 97094_at   | 27.4   | 24.6   | 22.8   | 27     | 26.7   | 36.9   | 27.3   | 29.4   | 0.144269573 | 25.45   | 30.075   | 4.625   | 0.846217789 | 0.1081  | 1.175  |
| 97095_at   | 93     | 69.3   | 97.2   | 85.8   | 124    | 88.3   | 119.3  | 120.1  | 0.044852746 | 86.325  | 112.925  | 26.6    | 0.764445428 | 0.04976 | 1.307  |
| 97096_at   | 118.7  | 88.7   | 140.4  | 152.3  | 37.5   | 98.6   | 135.4  | 141.8  | 0.469954934 | 125.025 | 103.325  | 21.7    | 1.210016937 | 0.4171  | -1.335 |
| 97097_at   | 179.9  | 147.8  | 240.6  | 249.4  | 217.8  | 223.5  | 232.6  | 227.8  | 0.454084254 | 204.425 | 225.425  | 21      | 0.906842631 | 0.3747  | 1.127  |
| 97098_at   | 77.1   | 49.9   | 69.5   | 85     | 108.5  | 79.9   | 62.5   | 79.6   | 0.354108827 | 70.375  | 82.625   | 12.25   | 0.851739788 | 0.3587  | 1.174  |
| 97099_at   | 11.9   | 14.2   | 6.9    | 8.9    | 8.3    | 10.1   | 10.4   | 9.6    | 0.633139322 | 10.475  | 9.6      | 0.875   | 1.091145833 | 0.7551  | -1.056 |
| 97100_at   | 57.3   | 45.5   | 140.1  | 35.6   | 31.8   | 215.2  | 35.8   | 195.7  | 0.412483563 | 69.625  | 119.625  | 50      | 0.582027168 | 0.6073  | 1.385  |
| 97101_at   | 32.8   | 9.1    | 27.6   | 56.2   | 19     | 39.8   | 23.7   | 39.2   | 0.931747843 | 31.425  | 30.425   | 1       | 1.032867707 | 0.8146  | 1.11   |
| 97102_at   | 123.8  | 138.5  | 148.7  | 102.3  | 188.3  | 153.2  | 176    | 151.1  | 0.02876172  | 128.325 | 167.15   | 38.825  | 0.767723602 | 0.03276 | 1.309  |
| 97103_at   | 377.3  | 341.1  | 371.4  | 324.2  | 228.4  | 384.3  | 355.3  | 327.3  | 0.459710661 | 353.5   | 323.825  | 29.675  | 1.091639003 | 0.4195  | -1.11  |
| 97104_g_at | 794.9  | 694.7  | 818.6  | 850.2  | 433.6  | 667.5  | 772.2  | 721.6  | 0.15822201  | 789.6   | 648.725  | 140.875 | 1.217156731 | 0.1646  | -1.243 |
| 97105_at   | 284.1  | 206.8  | 250.3  | 331.4  | 266.2  | 246.8  | 267.6  | 327    | 0.792309652 | 268.15  | 276.9    | 8.75    | 0.968400144 | 0.736   | 1.042  |
| 97106_at   | 14.7   | 7.3    | 20.9   | 19.7   | 8.5    | 8.8    | 10.2   | 5.8    | 0.094476419 | 15.65   | 8.325    | 7.325   | 1.87987988  | 0.07587 | -1.783 |
| 97107_at   | 75.3   | 111.2  | 94.3   | 114.6  | 130.1  | 87.7   | 105.3  | 150.9  | 0.28669624  | 98.85   | 118.5    | 19.65   | 0.834177215 | 0.3     | 1.19   |
| 97108_at   | 12.8   | 55.7   | 92     | 113.6  | 103.8  | 21.9   | 50.6   | 121.3  | 0.860116471 | 68.525  | 74.4     | 5.875   | 0.921034946 | 0.812   | 1.169  |
| 97109_at   | 8.9    | 16.3   | 7.7    | 8.2    | 7.3    | 11.4   | 7.9    | 12.9   | 0.875655654 | 10.275  | 9.875    | 0.4     | 1.040506329 | 0.9357  | 1.019  |
| 97110_at   | 77.9   | 83.2   | 128.4  | 88.8   | 45.1   | 69.7   | 92.1   | 77.4   | 0.172319834 | 94.575  | 71.075   | 23.5    | 1.330636651 | 0.1653  | -1.347 |
| 97111_at   | 104.8  | 79.6   | 153.8  | 160.6  | 62.3   | 94.3   | 130    | 156.2  | 0.638603957 | 124.7   | 110.7    | 14      | 1.126467931 | 0.6196  | -1.147 |
| 97112_at   | 224    | 238.3  | 231.9  | 326.9  | 221.7  | 138    | 262.9  | 337.3  | 0.763402908 | 255.275 | 239.975  | 15.3    | 1.063756641 | 0.6479  | -1.105 |
| 97113_at   | 6.1    | 7.2    | 4.5    | 7      | 12.2   | 8.8    | 8      | 2.8    | 0.444015126 | 6.2     | 7.95     | 1.75    | 0.779874214 | 0.7017  | 1.145  |
| 97114_at   | 3736.7 | 3146.5 | 3680.7 | 3395.1 | 2731.3 | 3659.5 | 3386.4 | 3362.8 | 0.428903267 | 3489.75 | 3285     | 204.75  | 1.062328767 | 0.4226  | -1.066 |
| 97115_at   | 131.3  | 53.5   | 78.9   | 108.3  | 89.1   | 135.9  | 85.1   | 93.8   | 0.714442158 | 93      | 100.975  | 7.975   | 0.921020054 | 0.6138  | 1.126  |
| 97116_at   | 109.2  | 92.5   | 78.7   | 108.8  | 122    | 111.6  | 116.2  | 154.2  | 0.05842456  | 97.3    | 126      | 28.7    | 0.772222222 | 0.05084 | 1.296  |
| 97117_at   | 11.5   | 12     | 6.4    | 5.9    | 9.5    | 19.5   | 7.5    | 7.2    | 0.580056422 | 8.95    | 10.925   | 1.975   | 0.819221968 | 0.6143  | 1.171  |
| 97118_at   | 576.1  | 545.9  | 701.5  | 660.1  | 755.7  | 638.4  | 561.7  | 734.2  | 0.406461972 | 620.9   | 672.5    | 51.6    | 0.923271375 | 0.4189  | 1.081  |
| 97119_at   | 42.3   | 33.7   | 24.7   | 22.4   | 32.9   | 27.4   | 33.2   | 29.6   | 1           | 30.775  | 30.775   | 0       | 1           | 0.8541  | 1.03   |
| 97120_at   | 57.2   | 30.8   | 15.8   | 54     | 16.7   | 42.8   | 40.8   | 36.6   | 0.669127105 | 39.45   | 34.225   | 5.225   | 1.15266618  | 0.8222  | -1.091 |
| 97121_at   | 48.9   | 40     | 24.1   | 46.5   | 33     | 64.1   | 29.2   | 35.9   | 0.947205153 | 39.875  | 40.55    | 0.675   | 0.983353884 | 0.9918  | 1.003  |
| 97122_at   | 216.7  | 196.5  | 266.2  | 413.2  | 219.9  | 180.9  | 235.9  | 255.7  | 0.390872403 | 273.15  | 223.1    | 50.05   | 1.224338861 | 0.3906  | -1.182 |
| 97123_at   | 159.5  | 183.2  | 159.9  | 115.4  | 191    | 55.7   | 148.6  | 139.2  | 0.542472054 | 154.5   | 133.625  | 20.875  | 1.156220767 | 0.4646  | -1.251 |
| 97124_at   | 115.7  | 105.9  | 175.2  | 228.9  | 96     | 142    | 168.5  | 141.9  | 0.578475349 | 156.425 | 137.1    | 19.325  | 1.140955507 | 0.652   | -1.108 |
| 97125_f_at | 42.6   | 112    | 130.4  | 148.8  | 115.9  | 71.5   | 143    | 137.9  | 0.772351429 | 108.45  | 117.075  | 8.625   | 0.926329276 | 0.679   | 1.152  |
| 97126_at   | 35.9   | 23.2   | 36.7   | 42.9   | 38.2   | 46.5   | 35.5   | 37.8   | 0.360929791 | 34.675  | 39.5     | 4.825   | 0.877848101 | 0.3404  | 1.161  |
| 97127_f_at | 29.3   | 24.4   | 23     | 26.4   | 25.5   | 48.1   | 20.1   | 30.1   | 0.461478858 | 25.775  | 30.95    | 5.175   | 0.83279483  | 0.5061  | 1.145  |
| 97128_at   | 1      | 0.9    | 0.5    | 0.8    | 0.3    | 0.9    | 0.5    | 3.9    | 0.529429414 | 0.8     | 1.4      | 0.6     | 0.571428571 | 0.8243  | 1.142  |
| 97129_at   | 29.7   | 10.9   | 13.5   | 22.8   | 15.7   | 20.2   | 21.1   | 21.5   | 0.934337234 | 19.225  | 19.625   | 0.4     | 0.979617834 | 0.7146  | 1.098  |



|            |        |        |        |        |        |        |        |        |             |          |          |         |             |         |        |
|------------|--------|--------|--------|--------|--------|--------|--------|--------|-------------|----------|----------|---------|-------------|---------|--------|
| 97130_at   | 77.9   | 71.5   | 84     | 103.7  | 59.2   | 89.2   | 170.7  | 85.8   | 0.541395635 | 84.275   | 101.225  | 16.95   | 0.832551247 | 0.6371  | 1.123  |
| 97131_at   | 181.3  | 185.1  | 274.1  | 315.1  | 186.5  | 199    | 251.6  | 261.2  | 0.723337761 | 238.9    | 224.575  | 14.325  | 1.063787154 | 0.7992  | -1.044 |
| 97132_at   | 240    | 259.7  | 224.3  | 238    | 251.6  | 396.2  | 242.4  | 275.6  | 0.248910987 | 240.5    | 291.45   | 50.95   | 0.825184423 | 0.1864  | 1.189  |
| 97133_at   | 19.2   | 11.1   | 7.2    | 8.6    | 7.6    | 20.7   | 13.3   | 14.6   | 0.530802014 | 11.525   | 14.05    | 2.525   | 0.820284698 | 0.5034  | 1.236  |
| 97134_at   | 9.6    | 24.1   | 7.4    | 7      | 11.5   | 29.4   | 8.9    | 17.1   | 0.471150942 | 12.025   | 16.725   | 4.7     | 0.718983558 | 0.3823  | 1.441  |
| 97135_at   | 4.7    | 3.3    | 4.3    | 19.5   | 2.3    | 9.9    | 5.9    | 5.2    | 0.637157801 | 7.95     | 5.825    | 2.125   | 1.364806867 | 0.7581  | -1.175 |
| 97136_at   | 92.6   | 60.3   | 77.7   | 156.8  | 67.5   | 175.8  | 213.2  | 231.8  | 0.138586253 | 96.85    | 172.075  | 75.225  | 0.562835973 | 0.1737  | 1.714  |
| 97137_at   | 8.8    | 10.8   | 7.7    | 18.6   | 5.3    | 8.2    | 13.1   | 13     | 0.632342657 | 11.475   | 9.9      | 1.575   | 1.159090909 | 0.625   | -1.161 |
| 97138_at   | 143.2  | 117.8  | 94     | 246.6  | 65.9   | 130.1  | 236.9  | 326.3  | 0.581019062 | 150.4    | 189.8    | 39.4    | 0.792413066 | 0.7577  | 1.141  |
| 97139_at   | 59     | 67.8   | 31.9   | 39.2   | 16.5   | 46.9   | 41.3   | 43.6   | 0.299364601 | 49.475   | 37.075   | 12.4    | 1.334457181 | 0.3299  | -1.376 |
| 97140_at   | 69.7   | 29.1   | 11.5   | 76.4   | 59.8   | 83     | 29.1   | 96     | 0.381609282 | 46.675   | 66.975   | 20.3    | 0.696901829 | 0.3587  | 1.67   |
| 97141_s_at | 43.5   | 44.3   | 12     | 12.1   | 10.7   | 41.9   | 21.7   | 24.1   | 0.775218471 | 27.975   | 24.6     | 3.375   | 1.137195122 | 0.9285  | -1.045 |
| 97142_at   | 136.7  | 84.8   | 65.3   | 230.6  | 81     | 144.9  | 181.6  | 227.7  | 0.564459894 | 129.35   | 158.8    | 29.45   | 0.814546599 | 0.4995  | 1.291  |
| 97143_at   | 61     | 66.1   | 43.4   | 62.9   | 45.9   | 74.3   | 38.2   | 36     | 0.384331939 | 58.35    | 48.6     | 9.75    | 1.200617284 | 0.3071  | -1.237 |
| 97144_at   | 6.5    | 30.8   | 8.3    | 10.1   | 5.7    | 20.9   | 31.8   | 6.5    | 0.794583171 | 13.925   | 16.225   | 2.3     | 0.858243451 | 0.8688  | 1.099  |
| 97145_at   | 309.3  | 260.3  | 249.9  | 203.3  | 263.8  | 348.6  | 230.5  | 163    | 0.927889396 | 255.7    | 251.475  | 4.225   | 1.016800875 | 0.8222  | -1.043 |
| 97146_g_at | 88.7   | 66.2   | 28.8   | 74.7   | 46.1   | 55.4   | 41.4   | 65.9   | 0.422324436 | 64.6     | 52.2     | 12.4    | 1.237547893 | 0.6024  | -1.16  |
| 97147_at   | 31.1   | 22.8   | 4.9    | 29.8   | 3.8    | 30.7   | 22.4   | 13.5   | 0.605880676 | 22.15    | 17.6     | 4.55    | 1.258522727 | 0.6886  | -1.307 |
| 97148_at   | 110.2  | 71.4   | 73.9   | 87.1   | 84.6   | 108.8  | 87     | 127.8  | 0.270712517 | 85.65    | 102.05   | 16.4    | 0.839294463 | 0.2531  | 1.192  |
| 97149_at   | 78.1   | 58.4   | 80.5   | 51.3   | 43.5   | 114.4  | 88.8   | 81     | 0.410796855 | 67.075   | 81.925   | 14.85   | 0.818736649 | 0.5175  | 1.174  |
| 97150_at   | 7      | 0.9    | 3.9    | 1      | 0.7    | 6.8    | 1.4    | 0.8    | 0.719559542 | 3.2      | 2.425    | 0.775   | 1.319587629 | 0.6503  | -1.414 |
| 97151_at   | 679.9  | 413.1  | 502.1  | 505.9  | 345.2  | 725.7  | 482.7  | 402.9  | 0.733700091 | 525.25   | 489.125  | 36.125  | 1.073856376 | 0.6345  | -1.1   |
| 97152_at   | 4.6    | 2.4    | 1.4    | 1.2    | 2.8    | 3.4    | 4.4    | 2      | 0.455015811 | 2.4      | 3.15     | 0.75    | 0.761904762 | 0.3087  | 1.475  |
| 97153_at   | 46.9   | 23.9   | 25.9   | 17     | 21.3   | 19.9   | 11     | 12.7   | 0.15484516  | 28.425   | 16.225   | 12.2    | 1.75192604  | 0.09338 | -1.703 |
| 97154_f_at | 206.3  | 142.3  | 260.4  | 322.8  | 350.4  | 304.6  | 284.1  | 321.6  | 0.11903034  | 232.95   | 315.175  | 82.225  | 0.739113191 | 0.1062  | 1.41   |
| 97155_at   | 59.8   | 33.9   | 19.9   | 35.7   | 15.6   | 69.1   | 26.1   | 44.7   | 0.91796204  | 37.325   | 38.875   | 1.55    | 0.960128617 | 0.9344  | 1.034  |
| 97156_at   | 39.6   | 14.7   | 38.6   | 67.2   | 35.3   | 58.2   | 75.6   | 28.4   | 0.561965048 | 40.025   | 49.375   | 9.35    | 0.810632911 | 0.5152  | 1.307  |
| 97157_at   | 190    | 152.9  | 218.7  | 294.6  | 29     | 54     | 20.9   | 87.7   | 0.006016149 | 214.05   | 47.9     | 166.15  | 4.46868476  | 0.00348 | -5.052 |
| 97158_at   | 577.5  | 494.8  | 543.2  | 532.4  | 456.9  | 480.9  | 394.2  | 537.3  | 0.099644522 | 536.975  | 467.325  | 69.65   | 1.149039747 | 0.09237 | -1.154 |
| 97159_at   | 133.8  | 149.1  | 115.1  | 106.8  | 98.9   | 126.4  | 126.8  | 138.7  | 0.792191629 | 126.2    | 122.7    | 3.5     | 1.028524857 | 0.8024  | -1.028 |
| 97160_at   | 5891.8 | 7958.9 | 6682.9 | 7192.3 | 7890.8 | 6584   | 7133.6 | 7889.9 | 0.444910739 | 6931.475 | 7374.575 | 443.1   | 0.939915182 | 0.4304  | 1.067  |
| 97161_at   | 42.1   | 38.6   | 25.8   | 55.6   | 58.4   | 67.4   | 40.1   | 54.2   | 0.133720441 | 40.525   | 55.025   | 14.5    | 0.736483417 | 0.1431  | 1.383  |
| 97162_at   | 8.9    | 5.2    | 5.6    | 19.8   | 33.8   | 15.7   | 39.1   | 8.6    | 0.141462056 | 9.875    | 24.3     | 14.425  | 0.406378601 | 0.1059  | 2.434  |
| 97163_g_at | 491.6  | 392.4  | 436.3  | 516.7  | 417.1  | 511.6  | 441.4  | 473.4  | 0.964200956 | 459.25   | 460.875  | 1.625   | 0.996474098 | 0.9367  | 1.006  |
| 97164_at   | 1183.6 | 1209.9 | 1080   | 962    | 1169.5 | 1136.8 | 940.6  | 1031.9 | 0.628255689 | 1108.875 | 1069.7   | 39.175  | 1.036622418 | 0.638   | -1.036 |
| 97165_r_at | 33     | 51.7   | 49.9   | 79.9   | 69.2   | 45     | 88.3   | 91.2   | 0.219317441 | 53.625   | 73.425   | 19.8    | 0.730337079 | 0.2288  | 1.386  |
| 97166_at   | 153    | 224.2  | 214.5  | 248.4  | 194.6  | 286.9  | 186.7  | 218.6  | 0.71526808  | 210.025  | 221.7    | 11.675  | 0.947338746 | 0.7126  | 1.057  |
| 97167_g_at | 827.5  | 563.8  | 756.7  | 817.2  | 615.8  | 781.8  | 769.7  | 787.5  | 0.973172017 | 741.3    | 738.7    | 2.6     | 1.003519697 | 0.9796  | 1.003  |
| 97168_at   | 11     | 7.1    | 8.8    | 6.4    | 6.6    | 12.1   | 5      | 8      | 0.835508692 | 8.325    | 7.925    | 0.4     | 1.050473186 | 0.7315  | -1.083 |
| 97169_f_at | 62.2   | 16.1   | 28.9   | 11.6   | 34.2   | 85.6   | 22.7   | 37.2   | 0.431499454 | 29.7     | 44.925   | 15.225  | 0.661101836 | 0.3214  | 1.647  |
| 97170_at   | 15.5   | 6.3    | 1.2    | 1.9    | 11.9   | 3.1    | 2.1    | 3.2    | 0.784985628 | 6.225    | 5.075    | 1.15    | 1.226600985 | 0.9956  | 1.004  |
| 97171_f_at | 1742.2 | 2026.6 | 1757.6 | 1537   | 1838.7 | 1856.7 | 2254.8 | 1835.1 | 0.256153032 | 1765.85  | 1946.325 | 180.475 | 0.907273965 | 0.2425  | 1.103  |
| 97172_s_at | 110.6  | 91.5   | 159.8  | 131.4  | 78.5   | 128.3  | 162.3  | 208.9  | 0.529676928 | 123.325  | 144.5    | 21.175  | 0.853460208 | 0.6394  | 1.126  |
| 97173_f_at | 57     | 14     | 78.2   | 13.9   | 55.2   | 25.3   | 106.5  | 36.3   | 0.555976264 | 40.775   | 55.825   | 15.05   | 0.730407524 | 0.4385  | 1.581  |
| 97174_r_at | 76.6   | 100.3  | 51.9   | 27.5   | 42.7   | 53.7   | 67.1   | 33.6   | 0.437570664 | 64.075   | 49.275   | 14.8    | 1.30035515  | 0.5757  | -1.207 |
| 97175_at   | 62.8   | 63.3   | 42.5   | 75.8   | 47.6   | 80.2   | 73.7   | 53.9   | 0.800374468 | 61.1     | 63.85    | 2.75    | 0.956930305 | 0.8196  | 1.042  |
| 97176_at   | 299.1  | 174.5  | 239    | 251.9  | 131.4  | 241    | 258.2  | 235.3  | 0.546695026 | 241.125  | 216.475  | 24.65   | 1.113869962 | 0.5481  | -1.131 |
| 97177_at   | 25     | 11.9   | 20.4   | 18.7   | 3      | 18     | 13     | 19     | 0.257603365 | 19       | 13.25    | 5.75    | 1.433962264 | 0.2899  | -1.709 |
| 97178_at   | 178    | 163.7  | 202.2  | 249.3  | 251.6  | 287.3  | 284.2  | 288.6  | 0.016376454 | 198.3    | 277.925  | 79.625  | 0.713501844 | 0.01152 | 1.417  |
| 97179_at   | 433    | 384.5  | 346.6  | 391.9  | 314.1  | 361.1  | 315.2  | 351.2  | 0.051923522 | 389      | 335.4    | 53.6    | 1.159809183 | 0.04481 | -1.159 |
| 97180_f_at | 32.6   | 42.2   | 21.4   | 22.6   | 89.2   | 60.1   | 22.2   | 47.5   | 0.170056856 | 29.7     | 54.75    | 25.05   | 0.542465753 | 0.1598  | 1.709  |
| 97181_f_at | 5068.8 | 5512.9 | 5043   | 4862.5 | 5471.4 | 5386.5 | 5468.7 | 5439.4 | 0.102507309 | 5121.8   | 5441.5   | 319.7   | 0.941247818 | 0.06104 | 1.064  |
| 97182_at   | 40.6   | 32.3   | 50.9   | 65.3   | 35.4   | 13.2   | 63     | 72.4   | 0.936808315 | 47.275   | 46       | 1.275   | 1.027717391 | 0.6812  | -1.196 |
| 97184_at   | 166.5  | 181.7  | 190    | 204.9  | 132.7  | 183.2  | 194.6  | 180.7  | 0.452189068 | 185.775  | 172.8    | 12.975  | 1.075086806 | 0.4383  | -1.083 |
| 97185_at   | 45.4   | 18.6   | 23.2   | 37.3   | 33     | 37.5   | 27.2   | 39.7   | 0.658717296 | 31.125   | 34.35    | 3.225   | 0.906113537 | 0.5204  | 1.164  |
| 97186_s_at | 125.3  | 106.4  | 96.8   | 24.1   | 19.4   | 41.9   | 78.8   | 77.7   | 0.257265272 | 88.15    | 54.45    | 33.7    | 1.618916437 | 0.3997  | -1.58  |



|            |        |        |        |        |        |        |        |        |             |          |          |         |             |          |        |
|------------|--------|--------|--------|--------|--------|--------|--------|--------|-------------|----------|----------|---------|-------------|----------|--------|
| 97187_at   | 45.7   | 13.8   | 39.6   | 50.2   | 34.3   | 71.7   | 37.9   | 43.9   | 0.44426738  | 37.325   | 46.95    | 9.625   | 0.794994675 | 0.4197   | 1.343  |
| 97188_at   | 4.1    | 8      | 4.2    | 3.2    | 7.1    | 8.5    | 16     | 21.7   | 0.084685878 | 4.875    | 13.325   | 8.45    | 0.365853659 | 0.02627  | 2.613  |
| 97189_at   | 3.7    | 1.3    | 7.2    | 2.3    | 6.7    | 34.5   | 1.7    | 2.7    | 0.393183145 | 3.625    | 11.4     | 7.775   | 0.317982456 | 0.4183   | 1.921  |
| 97190_f_at | 7.3    | 4.8    | 3.2    | 5.7    | 7.7    | 7.9    | 22.8   | 20.4   | 0.097414181 | 5.25     | 14.7     | 9.45    | 0.357142857 | 0.03273  | 2.573  |
| 97191_at   | 3.4    | 2.4    | 4.4    | 2.8    | 0.8    | 6.1    | 3.8    | 4.7    | 0.64482188  | 3.25     | 3.85     | 0.6     | 0.844155844 | 0.9436   | -1.036 |
| 97192_at   | 54.3   | 11.3   | 24.7   | 28.2   | 29.1   | 79.3   | 34.7   | 34.8   | 0.355195638 | 29.625   | 44.475   | 14.85   | 0.666104553 | 0.279    | 1.597  |
| 97193_at   | 142.8  | 110.8  | 83.9   | 59.4   | 80     | 176.4  | 109.2  | 149.3  | 0.331346793 | 99.225   | 128.725  | 29.5    | 0.770829287 | 0.3371   | 1.307  |
| 97194_at   | 13.5   | 5.4    | 7.8    | 6.1    | 7.7    | 14.4   | 14.3   | 7.6    | 0.334434666 | 8.2      | 11       | 2.8     | 0.745454545 | 0.2976   | 1.365  |
| 97195_at   | 81.9   | 52.6   | 94.4   | 102    | 27.4   | 113.3  | 148.8  | 94.8   | 0.654752463 | 82.725   | 96.075   | 13.35   | 0.861046058 | 0.9737   | 1.014  |
| 97196_at   | 3.9    | 17.3   | 5.3    | 9.6    | 4      | 11.7   | 8      | 9      | 0.81397197  | 9.025    | 8.175    | 0.85    | 1.103975535 | 0.9842   | 1.008  |
| 97197_r_at | 483.1  | 762.2  | 910.5  | 692.4  | 466.9  | 751.4  | 587.5  | 808.3  | 0.63817948  | 712.05   | 653.525  | 58.525  | 1.08955281  | 0.666    | -1.086 |
| 97198_at   | 258.2  | 234.7  | 267.1  | 346.9  | 162.1  | 386.1  | 535.7  | 392.3  | 0.32414626  | 276.725  | 369.05   | 92.325  | 0.749830646 | 0.461    | 1.237  |
| 97199_at   | 451.4  | 534.3  | 883.1  | 802.4  | 531.6  | 611    | 856.2  | 679.9  | 0.988558222 | 667.8    | 669.675  | 1.875   | 0.997200134 | 0.8983   | 1.026  |
| 97200_f_at | 5338.7 | 7406.1 | 5508.8 | 6130.7 | 7157.4 | 5894.5 | 5824.8 | 6299.9 | 0.737468439 | 6096.075 | 6294.15  | 198.075 | 0.968530302 | 0.6881   | 1.038  |
| 97201_s_at | 3897   | 4523.9 | 3818.2 | 3253.9 | 5195   | 3872.4 | 4327.6 | 4058   | 0.257738418 | 3873.25  | 4363.25  | 490     | 0.88769839  | 0.2472   | 1.127  |
| 97203_at   | 2713.6 | 2763.1 | 3502.7 | 3377.5 | 2824.2 | 3000.6 | 3196.3 | 3047.8 | 0.758830305 | 3089.225 | 3017.225 | 72      | 1.023862987 | 0.8089   | -1.018 |
| 97204_s_at | 1037.2 | 1355.2 | 819.3  | 614.9  | 1165.5 | 822.7  | 726.4  | 705.7  | 0.61637464  | 956.65   | 855.075  | 101.575 | 1.118790749 | 0.6701   | -1.096 |
| 97205_at   | 1013.3 | 1696.2 | 1649.7 | 1839.6 | 1896.4 | 1380.5 | 1492   | 1671   | 0.790633568 | 1549.7   | 1609.975 | 60.275  | 0.96256153  | 0.7249   | 1.058  |
| 97206_at   | 44.9   | 91.4   | 139.2  | 150.5  | 74.3   | 92.4   | 55.6   | 84.2   | 0.311801891 | 106.5    | 76.625   | 29.875  | 1.389885808 | 0.4411   | -1.279 |
| 97207_f_at | 575.8  | 883.8  | 1057.2 | 834.2  | 1004.8 | 778.9  | 673    | 779.9  | 0.822778175 | 837.75   | 809.15   | 28.6    | 1.035345733 | 0.8893   | 1.022  |
| 97208_at   | 406.4  | 303.4  | 446.2  | 359.8  | 331.9  | 392.5  | 470.3  | 358.9  | 0.833156611 | 378.95   | 388.4    | 9.45    | 0.975669413 | 0.8228   | 1.027  |
| 97210_at   | 758.5  | 638.9  | 798.7  | 554.9  | 753.4  | 869.4  | 552.7  | 602.8  | 0.942961786 | 687.75   | 694.575  | 6.825   | 0.990173847 | 0.977    | 1.004  |
| 97211_at   | 2049.8 | 2261.3 | 2966.6 | 2710.2 | 2552.6 | 2341.3 | 3187.4 | 2987.4 | 0.379718146 | 2496.975 | 2767.175 | 270.2   | 0.90235529  | 0.3727   | 1.112  |
| 97213_at   | 66.7   | 45.4   | 74.4   | 8.9    | 19.4   | 10.4   | 51.1   | 52.7   | 0.431995798 | 48.85    | 33.4     | 15.45   | 1.46257485  | 0.6228   | -1.387 |
| 97216_at   | 56.1   | 85.6   | 65.8   | 80.2   | 55.2   | 93.7   | 22.2   | 80.5   | 0.625591986 | 71.925   | 62.9     | 9.025   | 1.143481717 | 0.4821   | -1.287 |
| 97217_at   | 3769.4 | 3536.1 | 3326.1 | 3250.4 | 3471.4 | 3779.1 | 2973.2 | 3622.9 | 0.967921861 | 3470.5   | 3461.65  | 8.85    | 1.002556584 | 0.9395   | 1.005  |
| 97220_at   | 979.4  | 1385.2 | 872.5  | 857.4  | 1065.7 | 846.9  | 786.3  | 879.4  | 0.39691006  | 1023.625 | 894.575  | 129.05  | 1.144258447 | 0.3817   | -1.129 |
| 97222_at   | 599.4  | 629.5  | 527.1  | 584.7  | 490.6  | 709    | 451.8  | 468    | 0.438854156 | 585.175  | 529.85   | 55.325  | 1.104416344 | 0.3406   | -1.121 |
| 97224_at   | 474.4  | 436.9  | 394.2  | 470.5  | 426.3  | 508    | 436.9  | 507.7  | 0.408721741 | 444      | 469.725  | 25.725  | 0.945233913 | 0.4166   | 1.057  |
| 97226_at   | 1082.8 | 1179.5 | 1115.9 | 1538.7 | 701.8  | 596    | 778.7  | 888.4  | 0.010938228 | 1229.225 | 741.225  | 488     | 1.658369591 | 0.00482  | -1.659 |
| 97227_at   | 319.2  | 258.9  | 458.2  | 419.5  | 111.7  | 244.9  | 278.4  | 230.2  | 0.046547029 | 363.95   | 216.3    | 147.65  | 1.682616736 | 0.06433  | -1.735 |
| 97228_at   | 871.7  | 756.2  | 643    | 729.7  | 561.2  | 667.5  | 573.7  | 637.5  | 0.051305699 | 750.15   | 609.975  | 140.175 | 1.2298045   | 0.03515  | -1.226 |
| 97229_at   | 3793.9 | 4633.1 | 3438.2 | 3332   | 4455.7 | 3656   | 3225.6 | 3226.6 | 0.715033725 | 3799.3   | 3640.975 | 158.325 | 1.043484232 | 0.7      | -1.044 |
| 97232_at   | 45.9   | 23.7   | 24.6   | 20.6   | 37.4   | 30.9   | 15.5   | 55.1   | 0.572764167 | 28.7     | 34.725   | 6.025   | 0.82649388  | 0.6635   | 1.157  |
| 97234_at   | 118.4  | 139    | 105    | 119.4  | 115.3  | 139.5  | 109.3  | 117.4  | 0.994034769 | 120.45   | 120.375  | 0.075   | 1.000623053 | 0.9992   | 1      |
| 97235_f_at | 10.4   | 8.6    | 5.7    | 3.5    | 3      | 13.4   | 2.3    | 14.3   | 0.753560317 | 7.05     | 8.25     | 1.2     | 0.854545455 | 0.898    | -1.075 |
| 97236_r_at | 68.5   | 29.7   | 45.9   | 59.3   | 17.1   | 114.8  | 56.3   | 56.4   | 0.661531579 | 50.85    | 61.15    | 10.3    | 0.831561733 | 0.9475   | 1.03   |
| 97237_at   | 939.1  | 1028.1 | 1193.1 | 1032.9 | 999    | 892.2  | 1194   | 1040.6 | 0.84397681  | 1048.3   | 1031.45  | 16.85   | 1.016336226 | 0.8254   | 1.018  |
| 97238_at   | 203.9  | 177.6  | 193.2  | 332.7  | 232.8  | 172    | 274.2  | 273.5  | 0.803354066 | 226.85   | 238.125  | 11.275  | 0.952650919 | 0.7343   | 1.066  |
| 97239_at   | 71.2   | 74.6   | 91.3   | 105.5  | 83.2   | 86.4   | 81.8   | 99.8   | 0.820591213 | 85.65    | 87.8     | 2.15    | 0.975512528 | 0.7474   | 1.035  |
| 97240_g_at | 2961.2 | 2962.1 | 2981.7 | 2677.7 | 2843.6 | 2908.7 | 2366.2 | 2791.4 | 0.292972092 | 2895.675 | 2727.475 | 168.2   | 1.06166876  | 0.291    | -1.064 |
| 97241_at   | 1214.1 | 1250.2 | 1429.4 | 1287.9 | 1363.7 | 995.4  | 1028.3 | 1043.3 | 0.117857883 | 1295.4   | 1107.675 | 187.725 | 1.169476606 | 0.09087  | -1.177 |
| 97242_at   | 626.6  | 549.1  | 498.6  | 523.3  | 489.9  | 541.8  | 452.9  | 514    | 0.194819924 | 549.4    | 499.65   | 49.75   | 1.099569699 | 0.184    | -1.098 |
| 97243_at   | 941.6  | 1082.8 | 1129   | 1050.2 | 620.5  | 683.5  | 679.4  | 830.9  | 0.001216806 | 1050.9   | 703.575  | 347.325 | 1.493657393 | 0.001423 | -1.499 |
| 97247_at   | 1266.6 | 1804.7 | 2529.5 | 1756.2 | 1529.7 | 1767.3 | 2298.5 | 1908.1 | 0.90932834  | 1839.25  | 1875.9   | 36.65   | 0.980462711 | 0.822    | 1.039  |
| 97248_at   | 3605.7 | 3730.9 | 3080.7 | 2765.5 | 3342.8 | 3055.7 | 2611   | 2491.3 | 0.211640233 | 3295.7   | 2875.2   | 420.5   | 1.146250696 | 0.2125   | -1.146 |
| 97249_at   | 880    | 682.2  | 682.6  | 689.3  | 625.4  | 526.8  | 482.8  | 586.6  | 0.02708078  | 733.525  | 555.4    | 178.125 | 1.3207148   | 0.01729  | -1.319 |
| 97250_at   | 4881   | 5174.6 | 3850   | 3453.2 | 5289.7 | 4569.3 | 3715.3 | 3858.7 | 0.974064377 | 4339.7   | 4358.25  | 18.55   | 0.995743704 | 0.9523   | 1.008  |
| 97251_at   | 503.5  | 539.4  | 406.5  | 396.4  | 454.4  | 570.3  | 479.6  | 468.4  | 0.50124659  | 461.45   | 493.175  | 31.725  | 0.935671922 | 0.4684   | 1.074  |
| 97252_at   | 1144.6 | 875    | 923.6  | 799.6  | 749.2  | 621.2  | 519.7  | 796.3  | 0.035634869 | 935.7    | 671.6    | 264.1   | 1.393240024 | 0.03402  | -1.4   |
| 97253_at   | 325.1  | 294.7  | 310.6  | 282    | 294.9  | 286    | 309.9  | 246.5  | 0.302855486 | 303.1    | 284.325  | 18.775  | 1.066033588 | 0.2996   | -1.068 |
| 97254_at   | 2060.4 | 1703.8 | 1772.4 | 1941.4 | 1736.5 | 1831.6 | 2024   | 2050.2 | 0.723708167 | 1869.5   | 1910.575 | 41.075  | 0.978501237 | 0.7198   | 1.022  |
| 97255_at   | 735.3  | 878.7  | 1141.4 | 1335.7 | 972.9  | 787.3  | 1175.3 | 980.7  | 0.790313686 | 1022.775 | 979.05   | 43.725  | 1.04466064  | 0.8667   | -1.028 |
| 97256_at   | 35.1   | 11.6   | 11.1   | 15.4   | 9.3    | 52     | 44     | 58.3   | 0.132368856 | 18.3     | 40.9     | 22.6    | 0.447432763 | 0.2049   | 2.055  |
| 97257_at   | 91.1   | 62.7   | 129.5  | 105.3  | 79.9   | 103.6  | 115.2  | 116    | 0.705609971 | 97.15    | 103.675  | 6.525   | 0.937062937 | 0.6372   | 1.091  |
| 97258_at   | 32.1   | 38.4   | 52.5   | 51     | 44.5   | 38.2   | 39.6   | 52     | 0.990250265 | 43.5     | 43.575   | 0.075   | 0.99827883  | 0.914    | 1.016  |



|            |        |        |        |        |        |        |        |        |             |          |          |         |             |          |        |
|------------|--------|--------|--------|--------|--------|--------|--------|--------|-------------|----------|----------|---------|-------------|----------|--------|
| 97259_at   | 460.9  | 486.9  | 475.1  | 346.6  | 270    | 339.6  | 431.1  | 334.7  | 0.077509961 | 442.375  | 343.85   | 98.525  | 1.286534826 | 0.08399  | -1.293 |
| 97260_at   | 680.5  | 731.3  | 788.3  | 514.4  | 787.5  | 763.3  | 737    | 625.9  | 0.502950915 | 678.625  | 728.425  | 49.8    | 0.931633318 | 0.4832   | 1.083  |
| 97261_at   | 3704.6 | 3330.1 | 3299.1 | 2396.4 | 3561.6 | 3924.2 | 2944.1 | 2931.7 | 0.68450688  | 3182.55  | 3340.4   | 157.85  | 0.95274518  | 0.6701   | 1.055  |
| 97262_at   | 1821.9 | 1544.8 | 1946.8 | 1727.8 | 1520.3 | 1722.9 | 1768.7 | 1888   | 0.76744815  | 1760.325 | 1724.975 | 35.35   | 1.020493051 | 0.7764   | 1.02   |
| 97263_s_at | 1762.3 | 1182.8 | 2034.4 | 1527   | 1124.2 | 1654.5 | 1511.8 | 1359.3 | 0.361013034 | 1626.625 | 1412.45  | 214.175 | 1.151633686 | 0.3904   | -1.141 |
| 97264_r_at | 58.5   | 73.1   | 261.4  | 182.3  | 62.8   | 56     | 348.5  | 210.4  | 0.77324946  | 143.825  | 169.425  | 25.6    | 0.848900694 | 0.9218   | 1.061  |
| 97265_at   | 1914.1 | 2353.2 | 1560.9 | 1555.4 | 1567.4 | 1326.5 | 1131   | 1082   | 0.049646767 | 1845.9   | 1276.725 | 569.175 | 1.445808612 | 0.03074  | -1.44  |
| 97267_at   | 501.8  | 328    | 370.7  | 362.4  | 329.8  | 384.1  | 414.1  | 335.7  | 0.592713204 | 390.725  | 365.925  | 24.8    | 1.067773451 | 0.6129   | -1.059 |
| 97268_i_at | 3886.4 | 3467.9 | 3162.1 | 2371.9 | 2763.1 | 3556.9 | 2576.8 | 2488   | 0.388495372 | 3222.075 | 2846.2   | 375.875 | 1.132062048 | 0.4079   | -1.125 |
| 97269_f_at | 3383.4 | 3560.5 | 3148.5 | 2499.1 | 3675.1 | 3209.8 | 3110.8 | 3014   | 0.718731938 | 3147.875 | 3252.425 | 104.55  | 0.967854755 | 0.6815   | 1.039  |
| 97270_at   | 71.1   | 89.6   | 124.6  | 111.7  | 75.2   | 125.9  | 34.7   | 117.5  | 0.670891417 | 99.25    | 88.325   | 10.925  | 1.123690914 | 0.541    | -1.232 |
| 97271_at   | 1099.4 | 1212.7 | 749.7  | 792.2  | 1162.5 | 1000.9 | 827.3  | 825    | 0.947795234 | 963.5    | 953.925  | 9.575   | 1.010037477 | 0.9963   | 1.001  |
| 97272_at   | 1243.3 | 1330.4 | 863.6  | 1626.8 | 1152   | 1638.7 | 1104.4 | 854.8  | 0.741317257 | 1266.025 | 1187.475 | 78.55   | 1.066148761 | 0.7363   | -1.069 |
| 97273_at   | 728.8  | 510.2  | 856.6  | 745.3  | 666.8  | 564.2  | 631.8  | 595.2  | 0.283011615 | 710.225  | 614.5    | 95.725  | 1.155777055 | 0.3082   | -1.138 |
| 97274_at   | 1590.5 | 1672.3 | 1705.6 | 1507.8 | 2142.6 | 1600.9 | 2045.5 | 1628.2 | 0.192177805 | 1619.05  | 1854.3   | 235.25  | 0.873132719 | 0.1626   | 1.137  |
| 97276_at   | 471.3  | 472.1  | 384.1  | 360    | 441.4  | 463.6  | 379.8  | 380.8  | 0.885021138 | 421.875  | 416.4    | 5.475   | 1.013148415 | 0.9146   | 1.01   |
| 97277_at   | 328.9  | 417.9  | 393.6  | 400.7  | 473.7  | 435.4  | 451.9  | 468.6  | 0.026195599 | 385.275  | 457.4    | 72.125  | 0.84231526  | 0.02077  | 1.191  |
| 97278_at   | 16.9   | 11     | 8.7    | 12.6   | 7.7    | 14.1   | 12.1   | 13.7   | 0.865889539 | 12.3     | 11.9     | 0.4     | 1.033613445 | 0.8771   | -1.032 |
| 97279_at   | 831.1  | 881.4  | 1086.6 | 1139.7 | 926.1  | 757.4  | 925    | 994.3  | 0.396204327 | 984.7    | 900.7    | 84      | 1.093260797 | 0.4136   | -1.089 |
| 97281_at   | 57.3   | 66.2   | 58.3   | 33.1   | 52.2   | 71.2   | 64     | 58.1   | 0.397439607 | 53.725   | 61.375   | 7.65    | 0.875356415 | 0.3797   | 1.172  |
| 97282_at   | 138.7  | 86.7   | 116.5  | 134.8  | 94.6   | 127.8  | 133.3  | 84.5   | 0.609039045 | 119.175  | 110.05   | 9.125   | 1.082916856 | 0.6166   | -1.085 |
| 97283_at   | 29.2   | 21.8   | 28.5   | 37.4   | 136.4  | 108.6  | 106.3  | 73.7   | 0.007226904 | 29.225   | 106.25   | 77.025  | 0.275058824 | 0.000266 | 3.617  |
| 97284_at   | 761.6  | 688.8  | 790.1  | 844.2  | 718.8  | 858.8  | 707.2  | 699.3  | 0.631729629 | 771.175  | 746.025  | 25.15   | 1.033712007 | 0.6159   | -1.035 |
| 97285_f_at | 292.7  | 305    | 226.6  | 266.5  | 317.8  | 237.9  | 232.4  | 284.9  | 0.873170371 | 272.7    | 268.25   | 4.45    | 1.016589003 | 0.8588   | 1.019  |
| 97287_at   | 3.3    | 5.3    | 5.2    | 3.4    | 8.6    | 7.2    | 9      | 5.2    | 0.024945407 | 4.3      | 7.5      | 3.2     | 0.573333333 | 0.01965  | 1.755  |
| 97288_at   | 2.7    | 3.5    | 4.4    | 5.3    | 14.8   | 8.8    | 2.8    | 7      | 0.17661846  | 3.975    | 8.35     | 4.375   | 0.476047904 | 0.162    | 1.827  |
| 97292_at   | 2543.5 | 2157.6 | 2342.9 | 2070.6 | 2230.1 | 1931.9 | 2341.9 | 2013.1 | 0.331882531 | 2278.65  | 2129.25  | 149.4   | 1.070165551 | 0.3294   | -1.07  |
| 97293_at   | 429.2  | 447.4  | 510.3  | 570.4  | 443.1  | 422.6  | 485.1  | 475.2  | 0.402130532 | 489.325  | 456.5    | 32.825  | 1.071905805 | 0.4052   | -1.067 |
| 97295_at   | 723.1  | 536    | 824.8  | 938.5  | 541    | 773.9  | 790.2  | 707.2  | 0.629709667 | 755.6    | 703.075  | 52.525  | 1.074707535 | 0.6898   | -1.064 |
| 97296_at   | 720    | 640.1  | 621.4  | 585    | 763    | 647.7  | 601.1  | 691.1  | 0.475334612 | 641.625  | 675.725  | 34.1    | 0.949535684 | 0.4756   | 1.052  |
| 97297_at   | 178.6  | 301    | 368.6  | 332.7  | 319.7  | 316.6  | 282.6  | 364.9  | 0.594965711 | 295.225  | 320.95   | 25.725  | 0.919847328 | 0.523    | 1.122  |
| 97300_at   | 37     | 8.6    | 6.7    | 6      | 16.4   | 26.6   | 19.5   | 7.2    | 0.752328065 | 14.575   | 17.425   | 2.85    | 0.836441894 | 0.4653   | 1.484  |
| 97301_at   | 1982.6 | 2188.7 | 2688.1 | 2991   | 1991   | 1942.3 | 2406.1 | 2403.3 | 0.343391648 | 2462.6   | 2185.675 | 276.925 | 1.12669999  | 0.353    | -1.118 |
| 97302_at   | 1251.6 | 1297.7 | 1440.2 | 1883.6 | 1659.6 | 1365.3 | 1882   | 1544.1 | 0.455707409 | 1468.275 | 1612.75  | 144.475 | 0.91041699  | 0.4132   | 1.106  |
| 97304_at   | 594.6  | 491.7  | 998.2  | 1085.7 | 821.8  | 821.5  | 936.4  | 1297.6 | 0.378354891 | 792.55   | 969.325  | 176.775 | 0.817630826 | 0.3249   | 1.268  |
| 97305_at   | 801.1  | 724    | 768.9  | 776.2  | 871.2  | 745.4  | 784.5  | 749.9  | 0.572289048 | 767.55   | 787.75   | 20.2    | 0.974357347 | 0.5777   | 1.025  |
| 97307_f_at | 9401.9 | 9549.3 | 6976.2 | 6984.7 | 9006.8 | 8214.5 | 7243.5 | 7687.6 | 0.825758188 | 8228.025 | 8038.1   | 189.925 | 1.023628096 | 0.8854   | -1.015 |
| 97308_at   | 620.1  | 552.3  | 493.3  | 590.1  | 560.8  | 508.8  | 526.6  | 530.2  | 0.334015587 | 563.95   | 531.6    | 32.35   | 1.060854026 | 0.3345   | -1.058 |
| 97309_at   | 1243.6 | 1203.2 | 1142.2 | 1166   | 1122.8 | 1173.8 | 1315.3 | 1036   | 0.691504216 | 1188.75  | 1161.975 | 26.775  | 1.023042664 | 0.6421   | -1.026 |
| 97310_at   | 565.3  | 450    | 406.4  | 469.3  | 337.2  | 480.5  | 472.8  | 452.1  | 0.462701156 | 472.75   | 435.65   | 37.1    | 1.085160106 | 0.4651   | -1.088 |
| 97311_at   | 5336.7 | 5305.9 | 4375.1 | 4223.9 | 4651.4 | 4786.6 | 4655.4 | 4136.1 | 0.482475013 | 4810.4   | 4557.375 | 253.025 | 1.055519899 | 0.5031   | -1.051 |
| 97312_at   | 4584.9 | 3904.4 | 6985.3 | 6965.2 | 6042.5 | 4770.8 | 8177.7 | 5906.3 | 0.587145968 | 5609.95  | 6224.325 | 614.375 | 0.901294518 | 0.5494   | 1.124  |
| 97313_at   | 1206.8 | 1034.8 | 1400.1 | 1301.9 | 1203.9 | 1183   | 1328   | 1360.7 | 0.728178751 | 1235.9   | 1268.9   | 33      | 0.973993222 | 0.691    | 1.031  |
| 97315_at   | 1233.8 | 1265.8 | 1172.9 | 1090.6 | 1358.4 | 1280.7 | 1207.3 | 1205.7 | 0.221481818 | 1190.775 | 1263.025 | 72.25   | 0.942796065 | 0.2208   | 1.061  |
| 97316_at   | 23.7   | 12.6   | 11.3   | 10.2   | 9.8    | 14     | 22.7   | 10.7   | 0.973244549 | 14.45    | 14.3     | 0.15    | 1.01048951  | 0.9763   | 1.008  |
| 97317_at   | 584.5  | 647.2  | 557.3  | 409.9  | 424.7  | 369.5  | 352.6  | 342.6  | 0.032072601 | 549.725  | 372.35   | 177.375 | 1.476366322 | 0.01325  | -1.461 |
| 97318_at   | 577.3  | 582.6  | 578.2  | 646.6  | 818.3  | 670.7  | 646.8  | 688    | 0.057248974 | 596.175  | 705.95   | 109.775 | 0.844500319 | 0.03067  | 1.181  |
| 97319_at   | 217.7  | 230.4  | 275.6  | 259.7  | 293.7  | 292    | 182    | 245.9  | 0.808843436 | 245.85   | 253.4    | 7.55    | 0.970205209 | 0.8979   | -1.017 |
| 97320_at   | 143.8  | 145.8  | 140.4  | 154.1  | 236.9  | 178.7  | 100.2  | 154.1  | 0.505418803 | 146.025  | 167.475  | 21.45   | 0.871921182 | 0.6309   | 1.096  |
| 97322_at   | 2.1    | 11     | 6.1    | 6.8    | 10.8   | 2.1    | 15.5   | 2.4    | 0.763427591 | 6.5      | 7.7      | 1.2     | 0.844155844 | 0.9607   | -1.032 |
| 97324_at   | 189    | 224.4  | 155.2  | 150.6  | 226    | 219.7  | 136    | 228.5  | 0.451051387 | 179.8    | 202.55   | 22.75   | 0.887682054 | 0.5061   | 1.117  |
| 97325_at   | 295.3  | 256.5  | 463.2  | 301.9  | 320.9  | 339.3  | 426.8  | 445.8  | 0.371970091 | 329.225  | 383.2    | 53.975  | 0.85914666  | 0.3114   | 1.182  |
| 97327_at   | 1075.7 | 789.6  | 977.4  | 846.4  | 710    | 777.8  | 755.3  | 740.9  | 0.068685169 | 922.275  | 746      | 176.275 | 1.236293566 | 0.02954  | -1.228 |
| 97328_at   | 78.9   | 46.8   | 174.4  | 196.9  | 71.9   | 137.9  | 93.7   | 132    | 0.71723457  | 124.25   | 108.875  | 15.375  | 1.141216992 | 0.9831   | 1.008  |
| 97329_at   | 579.7  | 579    | 629.5  | 766.3  | 593.9  | 530.9  | 644    | 617.8  | 0.445230228 | 638.625  | 596.65   | 41.975  | 1.070351127 | 0.4448   | -1.066 |
| 97330_at   | 1009.9 | 1046.9 | 1090   | 1229.2 | 956.9  | 1112.5 | 931    | 1110   | 0.368254572 | 1094     | 1027.6   | 66.4    | 1.064616582 | 0.3606   | -1.065 |



|            |        |        |        |        |        |        |        |        |             |          |          |         |             |         |        |
|------------|--------|--------|--------|--------|--------|--------|--------|--------|-------------|----------|----------|---------|-------------|---------|--------|
| 97331_at   | 325.3  | 301.2  | 352.1  | 363.7  | 338.2  | 413.1  | 320.5  | 397.2  | 0.284064795 | 335.575  | 367.25   | 31.675  | 0.913750851 | 0.2861  | 1.091  |
| 97332_at   | 698.1  | 653.9  | 565.2  | 491.4  | 612.8  | 668.6  | 513.4  | 588.4  | 0.914201496 | 602.15   | 595.8    | 6.35    | 1.010657939 | 0.9516  | 1.006  |
| 97333_at   | 814.2  | 682.5  | 787.9  | 1219.4 | 812.6  | 690.5  | 1047.4 | 1373.5 | 0.603585382 | 876      | 981      | 105     | 0.892966361 | 0.6156  | 1.109  |
| 97334_at   | 337.3  | 315.6  | 291.1  | 213    | 262.9  | 295.9  | 275.4  | 281    | 0.730837055 | 289.25   | 278.8    | 10.45   | 1.037482066 | 0.8334  | 1.023  |
| 97335_at   | 54     | 52.7   | 22.9   | 19.6   | 30.3   | 85     | 57     | 55.7   | 0.225651869 | 37.3     | 57       | 19.7    | 0.654385965 | 0.2221  | 1.602  |
| 97336_at   | 830.7  | 847.3  | 867.4  | 601.4  | 984.6  | 982.1  | 834.6  | 836.7  | 0.16105304  | 786.7    | 909.5    | 122.8   | 0.864980759 | 0.1726  | 1.165  |
| 97338_at   | 24.5   | 28.2   | 1.3    | 16.4   | 10.2   | 20.6   | 13.1   | 20.1   | 0.817456885 | 17.6     | 16       | 1.6     | 1.1         | 0.6678  | 1.402  |
| 97339_at   | 472    | 535    | 682.4  | 532.1  | 470.1  | 482.8  | 555.2  | 520.7  | 0.377900053 | 555.375  | 507.2    | 48.175  | 1.094982256 | 0.3689  | -1.087 |
| 97340_at   | 421.9  | 512.3  | 587.7  | 696.8  | 507.1  | 384.1  | 542.1  | 569.7  | 0.480628739 | 554.675  | 500.75   | 53.925  | 1.107688467 | 0.5103  | -1.101 |
| 97341_at   | 501.1  | 523.5  | 557.5  | 404.8  | 546.6  | 621.9  | 568.1  | 472    | 0.265632741 | 496.725  | 552.15   | 55.425  | 0.899619669 | 0.2764  | 1.114  |
| 97342_at   | 2235.7 | 2385.4 | 2268.2 | 2141.8 | 2451.9 | 2281.4 | 2122   | 2040.1 | 0.75836414  | 2257.775 | 2223.85  | 33.925  | 1.015255076 | 0.7275  | 1.017  |
| 97343_at   | 812.3  | 869.5  | 956.5  | 1093.8 | 918.2  | 670.8  | 846.5  | 982.8  | 0.421956191 | 933.025  | 854.575  | 78.45   | 1.091800018 | 0.4182  | -1.096 |
| 97345_at   | 571.2  | 500.1  | 430.6  | 634    | 302.8  | 569.4  | 546.1  | 522.9  | 0.546250452 | 533.975  | 485.3    | 48.675  | 1.100298784 | 0.5249  | -1.122 |
| 97346_at   | 103.3  | 131.5  | 159.2  | 172.9  | 155.8  | 102.7  | 201.6  | 179.1  | 0.518803073 | 141.725  | 159.8    | 18.075  | 0.886889862 | 0.5804  | 1.115  |
| 97347_at   | 2052.1 | 1947.9 | 2853.7 | 3383.3 | 1675.3 | 1961.4 | 2495.3 | 2490.5 | 0.35707528  | 2559.25  | 2155.625 | 403.625 | 1.187242679 | 0.3704  | -1.173 |
| 97349_at   | 229.5  | 235.3  | 268.9  | 344.7  | 243.8  | 193.8  | 266.2  | 271    | 0.451442973 | 269.6    | 243.7    | 25.9    | 1.106278211 | 0.4565  | -1.101 |
| 97351_i_at | 1102.2 | 1107.8 | 835.6  | 908.8  | 986.7  | 397.6  | 572.1  | 799.1  | 0.100612067 | 988.6    | 688.875  | 299.725 | 1.435093449 | 0.09958 | -1.508 |
| 97352_f_at | 1385.5 | 1113.6 | 961.4  | 1153.9 | 1009   | 884.2  | 908.6  | 1112.8 | 0.148562597 | 1153.6   | 978.65   | 174.95  | 1.178766668 | 0.1314  | -1.174 |
| 97353_at   | 241.6  | 283.1  | 367.4  | 520.9  | 339.3  | 231.7  | 341.6  | 389.6  | 0.710515584 | 353.25   | 325.55   | 27.7    | 1.085086776 | 0.791   | -1.058 |
| 97354_at   | 528.7  | 575    | 708.2  | 751.6  | 485.5  | 443    | 519.3  | 492.2  | 0.055375475 | 640.875  | 485      | 155.875 | 1.321391753 | 0.02387 | -1.31  |
| 97355_at   | 101.8  | 96.6   | 94.8   | 105.5  | 92.3   | 135    | 60.2   | 127.6  | 0.828610023 | 99.675   | 103.775  | 4.1     | 0.960491448 | 0.9711  | 1.007  |
| 97356_at   | 932.2  | 1048.8 | 822.9  | 599.1  | 724    | 831.3  | 657.4  | 672.3  | 0.279269743 | 850.75   | 721.25   | 129.5   | 1.179549393 | 0.3019  | -1.16  |
| 97357_at   | 142.3  | 148.6  | 211    | 229    | 175.9  | 145.8  | 235.9  | 196.3  | 0.849046093 | 182.725  | 188.475  | 5.75    | 0.969491975 | 0.8182  | 1.038  |
| 97358_at   | 1769.4 | 1603.2 | 2016.7 | 2206.8 | 1547.8 | 1571.4 | 1744.2 | 1718.2 | 0.152412874 | 1899.025 | 1645.4   | 253.625 | 1.15414185  | 0.124   | -1.147 |
| 97359_at   | 1164.9 | 1048.6 | 1237.7 | 1264.2 | 1098.8 | 1010   | 1231.6 | 1270.8 | 0.747522001 | 1178.85  | 1152.8   | 26.05   | 1.022597155 | 0.7354  | -1.024 |
| 97360_at   | 372.4  | 304.4  | 395.2  | 353.6  | 391.6  | 338.6  | 377    | 528.7  | 0.310825665 | 356.4    | 408.975  | 52.575  | 0.87144691  | 0.2914  | 1.136  |
| 97363_at   | 624.5  | 574    | 646    | 598.3  | 670.3  | 515.9  | 649.8  | 460.6  | 0.535482734 | 610.7    | 574.15   | 36.55   | 1.063659322 | 0.4686  | -1.076 |
| 97364_at   | 304.1  | 301.1  | 345    | 405    | 259.6  | 259.5  | 307.2  | 411.3  | 0.524967989 | 338.8    | 309.4    | 29.4    | 1.095022624 | 0.459   | -1.107 |
| 97365_at   | 213.9  | 158.9  | 148.3  | 216    | 121.9  | 172.9  | 169.4  | 143.7  | 0.190343668 | 184.275  | 151.975  | 32.3    | 1.212534956 | 0.1911  | -1.207 |
| 97366_at   | 619.9  | 619.7  | 646.5  | 566.7  | 651.1  | 509.7  | 421.3  | 584.8  | 0.248606156 | 613.2    | 541.725  | 71.475  | 1.131939637 | 0.215   | -1.145 |
| 97367_at   | 119.7  | 133.1  | 216.3  | 189.1  | 184.7  | 131.4  | 167.8  | 184.6  | 0.925504314 | 164.55   | 167.125  | 2.575   | 0.984592371 | 0.8326  | 1.036  |
| 97368_at   | 346.8  | 190.6  | 424.7  | 361.7  | 310.1  | 413.2  | 315.5  | 271    | 0.954408765 | 330.95   | 327.45   | 3.5     | 1.010688655 | 0.9267  | 1.019  |
| 97369_g_at | 301    | 196.2  | 343.2  | 208.7  | 185.8  | 264.7  | 257.8  | 245.1  | 0.578660722 | 262.275  | 238.35   | 23.925  | 1.100377596 | 0.6452  | -1.08  |
| 97370_at   | 701.7  | 650.6  | 728.9  | 599.7  | 738    | 826.7  | 691.7  | 728.9  | 0.10877148  | 670.225  | 746.325  | 76.1    | 0.898033698 | 0.1075  | 1.114  |
| 97371_at   | 144.9  | 175.4  | 144.6  | 136.5  | 171.1  | 147.8  | 179.4  | 137.6  | 0.532091681 | 150.35   | 158.975  | 8.625   | 0.945746187 | 0.5319  | 1.056  |
| 97372_at   | 235.5  | 261.2  | 244.9  | 278    | 238    | 310.9  | 278    | 222.7  | 0.749506915 | 254.9    | 262.4    | 7.5     | 0.971417683 | 0.7978  | 1.023  |
| 97373_at   | 361.4  | 280.3  | 279.8  | 303    | 275.2  | 303.3  | 270.5  | 278.7  | 0.306535526 | 306.125  | 281.925  | 24.2    | 1.085838432 | 0.278   | -1.081 |
| 97374_at   | 1202.1 | 1161.3 | 881.4  | 933.7  | 1042.8 | 1032.3 | 1014.3 | 907.8  | 0.627217164 | 1044.625 | 999.3    | 45.325  | 1.04535675  | 0.6755  | -1.038 |
| 97375_at   | 267.2  | 294.3  | 340.6  | 413.4  | 260.9  | 298.8  | 306.2  | 401.9  | 0.794857514 | 328.875  | 316.95   | 11.925  | 1.037624231 | 0.7933  | -1.037 |
| 97377_at   | 391.4  | 277    | 334.6  | 325.2  | 359.3  | 317.1  | 308.2  | 295.8  | 0.679403181 | 332.05   | 320.1    | 11.95   | 1.037332084 | 0.7116  | -1.032 |
| 97379_at   | 10     | 13     | 17.2   | 26.8   | 47.5   | 31.9   | 5.6    | 22.3   | 0.348907723 | 16.75    | 26.825   | 10.075  | 0.624417521 | 0.5928  | 1.333  |
| 97380_at   | 2738.4 | 2564.4 | 2183.4 | 2419.4 | 2550.8 | 2286   | 1958.7 | 1790   | 0.166869886 | 2476.4   | 2146.375 | 330.025 | 1.153759245 | 0.158   | -1.161 |
| 97381_s_at | 82.1   | 53.7   | 47     | 56.9   | 60.2   | 70.1   | 60     | 50.6   | 0.973802133 | 59.925   | 60.225   | 0.3     | 0.99501868  | 0.8857  | 1.021  |
| 97382_at   | 8.3    | 16.7   | 14.1   | 16.1   | 15.2   | 34.1   | 5.3    | 2.5    | 0.952383148 | 13.8     | 14.275   | 0.475   | 0.966725044 | 0.549   | -1.46  |
| 97383_at   | 710.9  | 702    | 1041.8 | 882.6  | 673.9  | 700.7  | 717.2  | 975.9  | 0.552278906 | 834.325  | 766.925  | 67.4    | 1.087883431 | 0.5429  | -1.085 |
| 97384_at   | 118    | 108.6  | 65.1   | 77     | 119    | 111.3  | 81.3   | 96.5   | 0.54175633  | 92.175   | 102.025  | 9.85    | 0.903455036 | 0.4907  | 1.128  |
| 97385_at   | 425.3  | 417.6  | 400.6  | 423.5  | 426.7  | 542.7  | 496.7  | 458.4  | 0.079228413 | 416.75   | 481.125  | 64.375  | 0.866199013 | 0.03996 | 1.15   |
| 97386_at   | 381.8  | 415.1  | 525.2  | 481.9  | 365.6  | 291.9  | 351.4  | 325.5  | 0.027245457 | 451      | 333.6    | 117.4   | 1.351918465 | 0.01436 | -1.346 |
| 97387_at   | 669.2  | 680.2  | 1018   | 713.1  | 646.5  | 672.1  | 644.5  | 715.5  | 0.3156128   | 770.125  | 669.65   | 100.475 | 1.150041066 | 0.2665  | -1.133 |
| 97389_at   | 12.5   | 7.3    | 4.8    | 12.5   | 6.1    | 13     | 15.6   | 19     | 0.266109093 | 9.275    | 13.425   | 4.15    | 0.690875233 | 0.3248  | 1.436  |
| 97390_at   | 477.2  | 384.1  | 500.3  | 523    | 437.4  | 517.7  | 430.5  | 504.7  | 0.971322579 | 471.15   | 472.575  | 1.425   | 0.996984606 | 0.9423  | 1.006  |
| 97391_at   | 299.1  | 315    | 293.1  | 174.3  | 171.5  | 259.9  | 259.1  | 191.6  | 0.260042745 | 270.375  | 220.525  | 49.85   | 1.226051468 | 0.3075  | -1.215 |
| 97392_at   | 577.7  | 377.1  | 514.1  | 473.9  | 421.7  | 552.8  | 417.9  | 445    | 0.635928063 | 485.7    | 459.35   | 26.35   | 1.057363666 | 0.6654  | -1.052 |
| 97393_at   | 364.8  | 424.3  | 347.5  | 442    | 390    | 277.1  | 376    | 364.8  | 0.259038144 | 394.65   | 351.975  | 42.675  | 1.121244407 | 0.2698  | -1.125 |
| 97394_at   | 700.1  | 611.2  | 1164.3 | 847.2  | 677    | 697.2  | 948.2  | 814.7  | 0.749162474 | 830.7    | 784.275  | 46.425  | 1.059194798 | 0.8266  | -1.037 |
| 97395_at   | 2428.4 | 2607.4 | 2533.2 | 2184.3 | 2495.5 | 2515   | 2398.4 | 2430.6 | 0.835209741 | 2438.325 | 2459.875 | 21.55   | 0.991239392 | 0.7976  | 1.011  |



|            |        |        |        |        |        |        |        |        |             |          |          |         |             |          |        |
|------------|--------|--------|--------|--------|--------|--------|--------|--------|-------------|----------|----------|---------|-------------|----------|--------|
| 97397_at   | 206.6  | 232.5  | 288.3  | 246    | 247.5  | 215.4  | 279.6  | 255.6  | 0.78528449  | 243.35   | 249.525  | 6.175   | 0.975252981 | 0.7613   | 1.028  |
| 97398_at   | 240.8  | 242.5  | 227.6  | 246.6  | 225    | 303.1  | 263.9  | 251.3  | 0.281496591 | 239.375  | 260.825  | 21.45   | 0.917760951 | 0.2571   | 1.084  |
| 97400_at   | 239.1  | 129.4  | 303.7  | 215.6  | 163.7  | 150.4  | 257.1  | 260.6  | 0.774292883 | 221.95   | 207.95   | 14      | 1.067323876 | 0.8315   | -1.053 |
| 97401_at   | 728.7  | 675.9  | 752.5  | 974    | 679.6  | 632.1  | 787.3  | 877.9  | 0.669386029 | 782.775  | 744.225  | 38.55   | 1.051798851 | 0.6677   | -1.05  |
| 97402_at   | 11.2   | 58.7   | 21.3   | 23.2   | 27.3   | 57.4   | 52.8   | 34.2   | 0.305379162 | 28.6     | 42.925   | 14.325  | 0.666278393 | 0.2079   | 1.719  |
| 97403_at   | 482.9  | 412.2  | 482.8  | 449.5  | 422.3  | 424.9  | 458.5  | 406.9  | 0.210008664 | 456.85   | 428.15   | 28.7    | 1.067032582 | 0.2078   | -1.066 |
| 97404_at   | 247.7  | 316.7  | 469.7  | 458.4  | 287    | 280    | 433.1  | 463.6  | 0.924237395 | 373.125  | 365.925  | 7.2     | 1.019676163 | 0.9564   | 1.012  |
| 97405_at   | 364    | 259.3  | 346.9  | 374.1  | 215.4  | 365.7  | 300    | 362.3  | 0.588063895 | 336.075  | 310.85   | 25.225  | 1.081148464 | 0.5719   | -1.094 |
| 97406_at   | 525.1  | 624.4  | 660.7  | 599.5  | 709.2  | 513.7  | 570.1  | 660.9  | 0.841454799 | 602.425  | 613.475  | 11.05   | 0.981987856 | 0.8791   | 1.014  |
| 97407_at   | 738.2  | 978.8  | 781.5  | 822.2  | 870.2  | 573.7  | 727.7  | 669.1  | 0.191488049 | 830.175  | 710.175  | 120     | 1.168972436 | 0.178    | -1.176 |
| 97409_at   | 71     | 98.4   | 103.9  | 134.1  | 150.5  | 193.8  | 118.1  | 144.2  | 0.051420046 | 101.85   | 151.65   | 49.8    | 0.671612265 | 0.04914  | 1.503  |
| 97410_at   | 646.5  | 553.1  | 530.3  | 559.2  | 509.3  | 807.5  | 532.8  | 465    | 0.941869046 | 572.275  | 578.65   | 6.375   | 0.988982978 | 0.9409   | -1.01  |
| 97411_at   | 1014.7 | 1016.3 | 1053.6 | 1171.7 | 1033.7 | 950.7  | 1095.3 | 1064.3 | 0.58294081  | 1064.075 | 1036     | 28.075  | 1.027099421 | 0.5843   | 1.027  |
| 97412_at   | 2001.7 | 1778.9 | 1493.7 | 1771.1 | 1571.3 | 1670.6 | 1556.6 | 1445   | 0.150512213 | 1761.35  | 1560.875 | 200.475 | 1.128437575 | 0.1327   | -1.124 |
| 97413_at   | 63.4   | 63.2   | 65.2   | 56.2   | 103.4  | 67.6   | 53.6   | 55.2   | 0.54465805  | 62       | 69.95    | 7.95    | 0.886347391 | 0.6005   | 1.089  |
| 97414_at   | 761.8  | 602.4  | 741.6  | 641.2  | 699.7  | 580.3  | 610.8  | 684.3  | 0.408352704 | 686.75   | 643.775  | 42.975  | 1.066754689 | 0.4178   | -1.065 |
| 97415_at   | 478.6  | 445.2  | 471.9  | 421    | 427.4  | 432.2  | 525.5  | 397.8  | 0.795517455 | 454.175  | 445.725  | 8.45    | 1.018957878 | 0.7418   | -1.023 |
| 97418_at   | 20.5   | 16.4   | 28.9   | 21     | 33.8   | 47.8   | 19.9   | 30.8   | 0.142592538 | 21.7     | 33.075   | 11.375  | 0.656084656 | 0.1152   | 1.485  |
| 97419_at   | 1224.9 | 942.1  | 1007.8 | 821.6  | 998.8  | 1229   | 928.5  | 972    | 0.770999407 | 999.1    | 1032.075 | 32.975  | 0.968049803 | 0.7336   | 1.038  |
| 97420_at   | 29.2   | 16.1   | 17.9   | 15     | 13.1   | 27.2   | 44     | 12.5   | 0.596295458 | 19.55    | 24.2     | 4.65    | 0.80785124  | 0.7548   | 1.117  |
| 97421_at   | 1145.4 | 1289.3 | 1621.5 | 1599   | 1474.8 | 1401.9 | 1592.3 | 1372.5 | 0.732448888 | 1413.8   | 1460.375 | 46.575  | 0.968107507 | 0.6656   | 1.042  |
| 97422_at   | 1601   | 1320.1 | 1551.3 | 1193.8 | 1776.5 | 1317.1 | 1309.7 | 1735.8 | 0.490451973 | 1416.55  | 1534.775 | 118.225 | 0.922969165 | 0.5071   | 1.08   |
| 97423_at   | 807.2  | 772    | 497.9  | 617.3  | 765.4  | 680    | 533.1  | 667.3  | 0.893203369 | 673.6    | 661.45   | 12.15   | 1.018368735 | 0.9515   | 1.009  |
| 97424_at   | 929.1  | 1045.1 | 1149.4 | 848.8  | 800.9  | 1137.5 | 1018.7 | 813.3  | 0.64874355  | 993.1    | 942.6    | 50.5    | 1.053575217 | 0.6205   | -1.058 |
| 97425_at   | 683.7  | 653.7  | 747.4  | 736.2  | 522.8  | 543.9  | 836    | 766.6  | 0.670461182 | 705.25   | 667.325  | 37.925  | 1.056831379 | 0.5649   | -1.078 |
| 97426_at   | 4807.7 | 4608.9 | 4206.7 | 3921.8 | 4012.1 | 4042.5 | 4208.6 | 4223.2 | 0.279048979 | 4386.275 | 4121.6   | 264.675 | 1.064216566 | 0.2587   | -1.061 |
| 97427_at   | 43.2   | 51.8   | 31.3   | 50.9   | 48.3   | 58.2   | 74.8   | 77.9   | 0.057122924 | 44.3     | 64.8     | 20.5    | 0.683641975 | 0.05652  | 1.464  |
| 97428_at   | 897.2  | 908.3  | 911.1  | 836.8  | 790.7  | 604.8  | 677.1  | 685.8  | 0.008132534 | 888.35   | 689.6    | 198.75  | 1.288210557 | 0.004568 | -1.293 |
| 97429_at   | 519.3  | 605.4  | 629    | 578.8  | 468.3  | 346.6  | 372.5  | 409.8  | 0.00211344  | 583.125  | 399.3    | 183.825 | 1.460368144 | 0.002546 | -1.466 |
| 97430_at   | 182.2  | 182.1  | 265.9  | 214.8  | 307.9  | 197.6  | 171    | 194    | 0.867989385 | 211.25   | 217.625  | 6.375   | 0.970706491 | 0.9228   | 1.016  |
| 97431_at   | 16.7   | 13.6   | 8.9    | 12.3   | 17.5   | 17.2   | 11.8   | 12.1   | 0.459486995 | 12.875   | 14.65    | 1.775   | 0.87883959  | 0.4522   | 1.147  |
| 97433_at   | 412.1  | 334.7  | 410    | 475.9  | 350.6  | 248.6  | 431.8  | 437.5  | 0.471020791 | 408.175  | 367.125  | 41.05   | 1.111814777 | 0.4454   | -1.131 |
| 97434_at   | 192.5  | 211.7  | 236.8  | 241.2  | 287.6  | 277.1  | 268.8  | 280.8  | 0.010343225 | 220.55   | 278.575  | 58.025  | 0.791707799 | 0.004794 | 1.268  |
| 97435_at   | 15.1   | 19.9   | 17.5   | 15.4   | 14.8   | 35.1   | 20.3   | 34     | 0.168709172 | 16.975   | 26.05    | 9.075   | 0.651631478 | 0.1384   | 1.453  |
| 97436_at   | 1007.2 | 858.3  | 914.9  | 957.6  | 943.9  | 989.1  | 1021.1 | 945    | 0.324277746 | 934.5    | 974.775  | 40.275  | 0.958682773 | 0.3085   | 1.044  |
| 97437_f_at | 60.1   | 48.8   | 59     | 72.1   | 60.9   | 49.3   | 59.7   | 73.7   | 0.900614056 | 60       | 60.9     | 0.9     | 0.985221675 | 0.9042   | 1.014  |
| 97438_r_at | 49.5   | 26.7   | 38.2   | 28.5   | 31.9   | 14.6   | 34.3   | 31.9   | 0.31958242  | 35.725   | 28.175   | 7.55    | 1.267968057 | 0.3345   | -1.296 |
| 97441_at   | 711.4  | 603.4  | 745.7  | 960.7  | 597.6  | 709.2  | 687.1  | 703.1  | 0.368438239 | 755.3    | 674.25   | 81.05   | 1.120207638 | 0.3668   | -1.107 |
| 97442_at   | 82.1   | 87.1   | 76.3   | 81.4   | 93.6   | 126.2  | 108.6  | 113.6  | 0.01860595  | 81.725   | 110.5    | 28.775  | 0.73959276  | 0.004638 | 1.345  |
| 97443_at   | 6262.5 | 6037.9 | 4318.9 | 3823.3 | 5486.4 | 5323.5 | 4179.1 | 4241.9 | 0.684935849 | 5110.65  | 4807.725 | 302.925 | 1.063007972 | 0.7531   | -1.048 |
| 97444_at   | 522.9  | 664.4  | 307.8  | 360.1  | 459.1  | 371.1  | 447.7  | 381    | 0.595508922 | 463.8    | 414.725  | 49.075  | 1.118331424 | 0.7142   | -1.073 |
| 97445_at   | 950.5  | 900.3  | 964.3  | 1084.1 | 1254.7 | 1074.9 | 1230   | 1088.9 | 0.022521778 | 974.8    | 1162.125 | 187.325 | 0.838808218 | 0.02031  | 1.192  |
| 97446_at   | 1209.1 | 766.9  | 922    | 897.5  | 926.6  | 745.7  | 753.7  | 927.5  | 0.349584062 | 948.875  | 838.375  | 110.5   | 1.131802594 | 0.344    | -1.123 |
| 97447_at   | 1449.7 | 1461.1 | 1365   | 1131.7 | 1294.1 | 1202.4 | 1189.6 | 1120.1 | 0.145245266 | 1351.875 | 1201.55  | 150.325 | 1.125109234 | 0.1369   | -1.121 |
| 97448_at   | 922.6  | 892.6  | 822.3  | 960.2  | 1189.5 | 1332.2 | 1386.3 | 1340.9 | 0.000372648 | 899.425  | 1312.225 | 412.8   | 0.685419802 | 0.000195 | 1.459  |
| 97449_at   | 1513.7 | 1259.4 | 1330.8 | 1413.2 | 1236.4 | 1633.3 | 1547.4 | 1372.1 | 0.543336077 | 1379.275 | 1447.3   | 68.025  | 0.952998687 | 0.5667   | 1.046  |
| 97450_s_at | 1863.6 | 1750.1 | 1569.9 | 1491.5 | 1648.6 | 2071.1 | 1713.1 | 1592.9 | 0.547073481 | 1668.775 | 1756.425 | 87.65   | 0.950097499 | 0.5448   | 1.051  |
| 97451_at   | 2424.6 | 2294.7 | 2180.4 | 1656   | 2211.1 | 2423.4 | 1927.9 | 1929.6 | 0.941440135 | 2138.925 | 2123     | 15.925  | 1.007501178 | 0.9852   | 1.002  |
| 97452_at   | 1592.9 | 1262.1 | 1244.4 | 1195.7 | 1097.1 | 1015.9 | 1154.3 | 1000.2 | 0.059376467 | 1323.775 | 1066.875 | 256.9   | 1.240796719 | 0.02782  | -1.235 |
| 97456_at   | 274.8  | 304.3  | 320.5  | 284.7  | 327.7  | 259    | 282.6  | 333    | 0.836015634 | 296.075  | 300.575  | 4.5     | 0.985028695 | 0.8751   | 1.011  |
| 97458_at   | 1582.3 | 1517.6 | 2093.4 | 1961.9 | 1634.1 | 1575   | 1407.5 | 2103.9 | 0.615706757 | 1788.8   | 1680.125 | 108.675 | 1.064682687 | 0.5986   | -1.067 |
| 97459_at   | 3986.2 | 4034.4 | 3869.7 | 3404.6 | 3442.1 | 3945.6 | 3618.2 | 3431.1 | 0.297368583 | 3823.725 | 3609.25  | 214.475 | 1.059423703 | 0.3035   | -1.059 |
| 97460_at   | 1794.9 | 2183.4 | 2147.6 | 2471.7 | 2031.8 | 1948.8 | 2043.8 | 2201.7 | 0.566504216 | 2149.4   | 2056.525 | 92.875  | 1.045161133 | 0.6032   | -1.039 |
| 97462_at   | 784.4  | 872.8  | 997.1  | 1075   | 758    | 622.6  | 952.5  | 1027.3 | 0.446915325 | 932.325  | 840.1    | 92.225  | 1.109778598 | 0.4191   | -1.123 |
| 97463_g_at | 1926.5 | 1855.5 | 2199.7 | 2253.9 | 1951.2 | 1731.2 | 1951.1 | 1911.4 | 0.188292758 | 2058.9   | 1886.225 | 172.675 | 1.091545282 | 0.1782   | -1.089 |
| 97464_at   | 1291   | 1408.1 | 1610.5 | 1714.6 | 1586.5 | 1488.7 | 1587.9 | 1545.7 | 0.668644483 | 1506.05  | 1552.2   | 46.15   | 0.970268007 | 0.6051   | 1.037  |



|            |         |         |         |        |        |         |         |         |             |           |          |          |             |           |        |
|------------|---------|---------|---------|--------|--------|---------|---------|---------|-------------|-----------|----------|----------|-------------|-----------|--------|
| 97465_at   | 73.4    | 38.1    | 65.8    | 121.1  | 112.6  | 132.6   | 94.5    | 60.1    | 0.315538073 | 74.6      | 99.95    | 25.35    | 0.746373187 | 0.2962    | 1.397  |
| 97468_at   | 3703.7  | 3477.5  | 3322.6  | 3378.6 | 3234.4 | 3366.4  | 3115.8  | 3428.7  | 0.144275537 | 3470.6    | 3286.325 | 184.275  | 1.056073273 | 0.1403    | -1.056 |
| 97469_at   | 34.1    | 90      | 56.2    | 81.5   | 68.6   | 60.3    | 87      | 38.9    | 0.917332474 | 65.45     | 63.7     | 1.75     | 1.027472527 | 0.9965    | 1.001  |
| 97470_at   | 116     | 99.2    | 129.6   | 179.5  | 89.9   | 112.3   | 168.9   | 130.6   | 0.822095809 | 131.075   | 125.425  | 5.65     | 1.045046841 | 0.8102    | -1.047 |
| 97471_at   | 739.9   | 748.6   | 1007.6  | 869.5  | 821.7  | 864.8   | 857     | 784.8   | 0.894460784 | 841.4     | 832.075  | 9.325    | 1.011206922 | 0.9615    | 1.004  |
| 97472_at   | 1651.3  | 1302.9  | 1264.3  | 1252.3 | 1302.5 | 1465.5  | 1465.2  | 1489.9  | 0.577229263 | 1367.7    | 1430.775 | 63.075   | 0.9559155   | 0.5137    | 1.052  |
| 97473_at   | 1199.1  | 1311.7  | 1118.2  | 962.7  | 1315.2 | 1150.6  | 911     | 1083.5  | 0.777944518 | 1147.925  | 1115.075 | 32.85    | 1.029459902 | 0.7652    | -1.032 |
| 97474_r_at | 111.2   | 217.7   | 278.2   | 215.8  | 401.6  | 284.7   | 217.8   | 243.5   | 0.180674111 | 205.725   | 286.9    | 81.175   | 0.717061694 | 0.1834    | 1.429  |
| 97475_at   | 9.2     | 21      | 9.3     | 41.5   | 16.6   | 27.3    | 7.3     | 31      | 0.975451739 | 20.25     | 20.55    | 0.3      | 0.98540146  | 0.8737    | 1.084  |
| 97477_at   | 1309.3  | 1620.3  | 1244.3  | 1377.1 | 1602.6 | 1231.5  | 1267.6  | 1314.1  | 0.7839959   | 1387.75   | 1353.95  | 33.8     | 1.024963994 | 0.7709    | -1.025 |
| 97478_at   | 805.7   | 763.7   | 944.1   | 835.2  | 964.7  | 986.4   | 889     | 866.4   | 0.116729578 | 837.175   | 926.625  | 89.45    | 0.903466883 | 0.1091    | 1.109  |
| 97479_at   | 2762.2  | 2142.1  | 2289    | 2028.8 | 2333.5 | 2478.5  | 2548.6  | 2481.2  | 0.414759509 | 2305.525  | 2460.45  | 154.925  | 0.937033876 | 0.3452    | 1.074  |
| 97480_f_at | 110.4   | 107.9   | 113.6   | 140.4  | 102.4  | 119.9   | 128.3   | 130.1   | 0.838240668 | 118.075   | 120.175  | 2.1      | 0.982525484 | 0.8256    | 1.019  |
| 97481_r_at | 48.6    | 51.7    | 48.3    | 64.7   | 47.7   | 61.3    | 86.9    | 49.6    | 0.45761119  | 53.325    | 61.375   | 8.05     | 0.868839104 | 0.4726    | 1.125  |
| 97482_at   | 305.3   | 334.6   | 298.6   | 322.5  | 240.3  | 401.1   | 320.4   | 353.5   | 0.720075016 | 315.25    | 328.825  | 13.575   | 0.958716643 | 0.8245    | 1.026  |
| 97483_at   | 18778.4 | 21730.1 | 12765.2 | 13835  | 15389  | 13998.5 | 15547.4 | 16190.9 | 0.533919368 | 16777.175 | 15281.45 | 1495.725 | 1.097878474 | 0.6021    | -1.074 |
| 97484_at   | 1854    | 1886.9  | 1830.9  | 2096.1 | 1677.5 | 1829.9  | 1880.7  | 2335    | 0.932832625 | 1916.975  | 1930.775 | 13.8     | 0.992852611 | 0.99      | 1.001  |
| 97485_at   | 1965.9  | 2099.3  | 2289    | 2379.7 | 2351.7 | 2236.8  | 2721.1  | 2464.6  | 0.111603266 | 2183.475  | 2443.55  | 260.075  | 0.893566737 | 0.1092    | 1.119  |
| 97486_at   | 2312.1  | 2472.6  | 3293    | 2214.2 | 2546.3 | 3016    | 2650.4  | 2140.5  | 0.961667746 | 2572.975  | 2588.3   | 15.325   | 0.994079125 | 0.926     | 1.011  |
| 97487_at   | 2328.5  | 2306.7  | 2274.1  | 2353   | 3035.6 | 2790.8  | 2911.1  | 2964.1  | 0.000601468 | 2315.575  | 2925.4   | 609.825  | 0.791541328 | 0.0000187 | 1.263  |
| 97488_at   | 1113.3  | 800.4   | 828.8   | 801.9  | 828.9  | 809.7   | 618.9   | 669.5   | 0.150867154 | 886.1     | 731.75   | 154.35   | 1.210932696 | 0.1284    | -1.208 |
| 97489_at   | 625.1   | 745.8   | 775.8   | 767    | 719    | 586.2   | 945.4   | 772.5   | 0.755011092 | 728.425   | 755.775  | 27.35    | 0.963811981 | 0.8225    | 1.026  |
| 97490_at   | 119.5   | 122.1   | 145.1   | 152.9  | 127.5  | 134     | 125.5   | 140.9   | 0.761703168 | 134.9     | 131.975  | 2.925    | 1.022163289 | 0.8058    | 1.017  |
| 97491_at   | 1294    | 1795.5  | 2279.4  | 2219.1 | 1831.1 | 1361.9  | 2053.8  | 1536.3  | 0.495579521 | 1897      | 1695.775 | 201.225  | 1.118662558 | 0.5524    | -1.106 |
| 97492_at   | 1245.8  | 1293.6  | 983.6   | 988.6  | 1395.8 | 1413    | 1235.5  | 1114.3  | 0.188356362 | 1127.9    | 1289.65  | 161.75   | 0.874578374 | 0.1869    | 1.147  |
| 97496_f_at | 1208.6  | 2247.4  | 1326.4  | 1363.4 | 1825   | 1397.7  | 1978.7  | 1800.3  | 0.466967169 | 1536.45   | 1750.425 | 213.975  | 0.877758259 | 0.3699    | 1.166  |
| 97497_at   | 137     | 119.8   | 160.5   | 205    | 199.3  | 33.7    | 175.3   | 228.7   | 0.941414277 | 155.575   | 159.25   | 3.675    | 0.976923077 | 0.7199    | -1.19  |
| 97498_at   | 1322    | 1172.5  | 1271    | 1305.4 | 1036   | 1247.1  | 1510.8  | 1239.3  | 0.93177416  | 1267.725  | 1258.3   | 9.425    | 1.007490265 | 0.8572    | -1.015 |
| 97499_at   | 11.3    | 4.3     | 1.9     | 4.8    | 2.8    | 2.5     | 4       | 17.7    | 0.790677329 | 5.575     | 6.75     | 1.175    | 0.825925926 | 0.9769    | 1.018  |
| 97500_g_at | 661.2   | 493.4   | 815.3   | 729.8  | 391.8  | 689.5   | 800.2   | 525.4   | 0.542285817 | 674.925   | 601.725  | 73.2     | 1.121650256 | 0.5084    | -1.143 |
| 97502_at   | 1772.9  | 2262.2  | 2430.2  | 2242.8 | 2693.9 | 2321.9  | 2393.7  | 2292.4  | 0.198488853 | 2177.025  | 2425.475 | 248.45   | 0.897566456 | 0.1976    | 1.119  |
| 97504_at   | 1307.9  | 1122.9  | 1255.9  | 2098.8 | 728.8  | 1003.2  | 2270.4  | 1170.2  | 0.719569407 | 1446.375  | 1293.15  | 153.225  | 1.118489734 | 0.5556    | -1.188 |
| 97505_at   | 1823.7  | 2011.6  | 2232.7  | 2105.4 | 2235.5 | 1805.5  | 2202.9  | 2117.7  | 0.73113869  | 2043.35   | 2090.4   | 47.05    | 0.977492346 | 0.747     | 1.022  |
| 97506_at   | 641.9   | 770.1   | 933.4   | 1115   | 922.1  | 652.1   | 991.2   | 910.5   | 0.976675298 | 865.1     | 868.975  | 3.875    | 0.995540723 | 0.9329    | 1.013  |
| 97507_at   | 135.1   | 226.6   | 179.3   | 201.7  | 297.3  | 205.5   | 203.2   | 290.7   | 0.10143273  | 185.675   | 249.175  | 63.5     | 0.745159025 | 0.1015    | 1.344  |
| 97508_at   | 270.3   | 214.6   | 176.6   | 212.6  | 181.5  | 338.6   | 166.8   | 177.6   | 0.960115646 | 218.525   | 216.125  | 2.4      | 1.011104685 | 0.8187    | -1.046 |
| 97509_f_at | 378     | 432.8   | 571.3   | 574.8  | 533.7  | 463.5   | 607.7   | 665.3   | 0.282815923 | 489.225   | 567.55   | 78.325   | 0.861994538 | 0.2794    | 1.168  |
| 97510_at   | 106.7   | 50.9    | 60.7    | 59.1   | 46.9   | 80.2    | 63.4    | 67.1    | 0.745669934 | 69.35     | 64.4     | 4.95     | 1.076863354 | 0.813     | -1.05  |
| 97511_at   | 141.3   | 125.4   | 147.2   | 142.2  | 113.3  | 142     | 113.6   | 154.1   | 0.503436444 | 139.025   | 130.75   | 8.275    | 1.063288719 | 0.4524    | -1.071 |
| 97512_at   | 5653.6  | 5372.8  | 4206.1  | 4887.4 | 6084   | 4851.3  | 4488.9  | 5185.7  | 0.801470736 | 5029.975  | 5152.475 | 122.5    | 0.976225018 | 0.8031    | 1.024  |
| 97514_at   | 477.4   | 520.1   | 443.9   | 462.2  | 610.8  | 451.4   | 438.6   | 517.1   | 0.539275785 | 475.9     | 504.475  | 28.575   | 0.943356955 | 0.5591    | 1.053  |
| 97515_at   | 842.2   | 863.6   | 981.6   | 995.6  | 1011.3 | 1133.2  | 888.5   | 881.5   | 0.453290798 | 920.75    | 978.625  | 57.875   | 0.940860902 | 0.4583    | 1.06   |
| 97516_at   | 698.6   | 840.2   | 1007.9  | 786    | 867.6  | 798.5   | 860.4   | 848.1   | 0.884694042 | 833.175   | 843.65   | 10.475   | 0.987583714 | 0.8007    | 1.021  |
| 97517_at   | 614.2   | 549.1   | 712.5   | 660.7  | 474.5  | 729.1   | 522.9   | 429.2   | 0.264300443 | 634.125   | 538.925  | 95.2     | 1.176647957 | 0.2109    | -1.196 |
| 97518_at   | 1156.6  | 1171.7  | 999.9   | 932.9  | 1406.7 | 1209    | 966.6   | 1086.2  | 0.399938135 | 1065.275  | 1167.125 | 101.85   | 0.912734283 | 0.4094    | 1.09   |
| 97519_at   | 3292    | 3354    | 2759.4  | 2394.7 | 3706.3 | 4515.5  | 4684.4  | 2890.6  | 0.091303571 | 2950.025  | 3949.2   | 999.175  | 0.746993062 | 0.08309   | 1.328  |
| 97520_s_at | 1280.2  | 1197.8  | 813.8   | 786.9  | 290.1  | 397     | 423.1   | 408     | 0.012860826 | 1019.675  | 379.55   | 640.125  | 2.686536688 | 0.000724  | -2.651 |
| 97521_at   | 384.6   | 364.3   | 305.9   | 314.5  | 327.4  | 474.8   | 355.1   | 323.5   | 0.523157116 | 342.325   | 370.2    | 27.875   | 0.924702863 | 0.53      | 1.073  |
| 97523_i_at | 1.2     | 19.7    | 1.1     | 0.7    | 3.6    | 1.1     | 1.3     | 13.1    | 0.875766622 | 5.675     | 4.775    | 0.9      | 1.188481675 | 0.7309    | 1.407  |
| 97524_f_at | 22.2    | 43.9    | 15.6    | 35.4   | 43.8   | 32.4    | 15.8    | 30.8    | 0.873715721 | 29.275    | 30.7     | 1.425    | 0.953583062 | 0.8456    | 1.066  |
| 97525_at   | 248.4   | 230.5   | 227.9   | 207    | 227.3  | 312.8   | 288.4   | 258.2   | 0.097901233 | 228.45    | 271.675  | 43.225   | 0.840894451 | 0.07657   | 1.183  |
| 97526_at   | 397.5   | 456.6   | 609.2   | 535.3  | 556.4  | 533.3   | 675.5   | 552.7   | 0.212116563 | 499.65    | 579.475  | 79.825   | 0.862245999 | 0.1944    | 1.17   |
| 97527_at   | 3333.7  | 4209.1  | 3043    | 3683.6 | 3318.1 | 3068.9  | 3198.6  | 3168.2  | 0.228625957 | 3567.35   | 3188.45  | 378.9    | 1.118835171 | 0.1903    | -1.111 |
| 97528_at   | 2201.3  | 2647.1  | 2422    | 2290.8 | 2648.3 | 2045.2  | 2451.4  | 2377.5  | 0.953334608 | 2390.3    | 2380.6   | 9.7      | 1.004074603 | 0.9322    | -1.006 |
| 97529_at   | 44.1    | 107.9   | 88.1    | 69.2   | 88.7   | 120.3   | 54.7    | 104.5   | 0.479569224 | 77.325    | 92.05    | 14.725   | 0.840032591 | 0.4993    | 1.204  |
| 97530_at   | 755.8   | 543.5   | 641.7   | 588.2  | 528.9  | 584.4   | 493.6   | 629.2   | 0.236395783 | 632.3     | 559.025  | 73.275   | 1.131076428 | 0.2254    | -1.127 |



|            |        |         |         |         |        |         |         |         |             |           |          |          |             |         |        |
|------------|--------|---------|---------|---------|--------|---------|---------|---------|-------------|-----------|----------|----------|-------------|---------|--------|
| 97531_at   | 409.4  | 374.1   | 328.4   | 292.9   | 399.8  | 387.8   | 391.5   | 406.4   | 0.174605928 | 351.2     | 396.375  | 45.175   | 0.886029644 | 0.1329  | 1.138  |
| 97532_at   | 160.6  | 143.1   | 124.4   | 128.9   | 110    | 139.4   | 178.8   | 180.1   | 0.529349092 | 139.25    | 152.075  | 12.825   | 0.915666612 | 0.5958  | 1.076  |
| 97533_at   | 10.1   | 67.1    | 40.4    | 49.8    | 45.6   | 60.5    | 75.5    | 43.8    | 0.349216571 | 41.85     | 56.35    | 14.5     | 0.742679681 | 0.3207  | 1.609  |
| 97535_at   | 2699.6 | 2556.8  | 3140.9  | 3429.7  | 2825.1 | 2668.8  | 3368.6  | 3312.9  | 0.754795392 | 2956.75   | 3043.85  | 87.1     | 0.971384924 | 0.7403  | 1.031  |
| 97536_at   | 312.9  | 284.6   | 374     | 335.7   | 258.7  | 338.1   | 254.4   | 304.4   | 0.216785862 | 326.8     | 288.9    | 37.9     | 1.131187262 | 0.2101  | -1.133 |
| 97538_at   | 506.5  | 572.8   | 818.9   | 818.6   | 787.7  | 686.3   | 891.1   | 838.2   | 0.251012856 | 679.2     | 800.825  | 121.625  | 0.848125371 | 0.2266  | 1.2    |
| 97539_at   | 275.6  | 198.5   | 261.8   | 280     | 241.4  | 363.5   | 212.3   | 332.5   | 0.452051108 | 253.975   | 287.425  | 33.45    | 0.883621814 | 0.4987  | 1.115  |
| 97540_f_at | 360.2  | 482.2   | 692.8   | 537.4   | 891.6  | 753.9   | 881.1   | 679     | 0.018591029 | 518.15    | 801.4    | 283.25   | 0.646556027 | 0.02291 | 1.579  |
| 97541_f_at | 12     | 59.3    | 48.2    | 54.4    | 83.9   | 59.8    | 95.6    | 57.7    | 0.074059618 | 43.475    | 74.25    | 30.775   | 0.585521886 | 0.1406  | 1.961  |
| 97542_at   | 99.6   | 57.3    | 84.4    | 19.7    | 26.5   | 36.8    | 54.3    | 84.1    | 0.520360158 | 65.25     | 50.425   | 14.825   | 1.294000992 | 0.6831  | -1.208 |
| 97543_at   | 1939.8 | 1778.8  | 2255.4  | 2210.4  | 2558.4 | 2069.6  | 2381.8  | 2353.7  | 0.100673851 | 2046.1    | 2340.875 | 294.775  | 0.874074865 | 0.1048  | 1.146  |
| 97544_at   | 4822.9 | 5068.2  | 5945.2  | 5049.6  | 4726.7 | 5362    | 5121.3  | 4967.5  | 0.558810974 | 5221.475  | 5044.375 | 177.1    | 1.035108413 | 0.5632  | -1.033 |
| 97546_at   | 117.1  | 101.2   | 120.2   | 113.6   | 57.3   | 105.9   | 160.9   | 112.3   | 0.86657459  | 113.025   | 109.1    | 3.925    | 1.035976169 | 0.6692  | -1.103 |
| 97548_at   | 64.4   | 56.8    | 72.7    | 78.9    | 82.6   | 105.8   | 105     | 109.2   | 0.006505575 | 68.2      | 100.65   | 32.45    | 0.677595628 | 0.0068  | 1.478  |
| 97549_at   | 371.8  | 493.9   | 726.5   | 772.3   | 604.2  | 670     | 768.3   | 665.9   | 0.445747044 | 591.125   | 677.1    | 85.975   | 0.873024664 | 0.3666  | 1.191  |
| 97550_at   | 595    | 526.6   | 793.3   | 662.4   | 505.2  | 654.4   | 627.9   | 720.8   | 0.820421855 | 644.325   | 627.075  | 17.25    | 1.027508671 | 0.8415  | 1.024  |
| 97551_at   | 103.2  | 121.6   | 180.2   | 193.9   | 198.4  | 125.1   | 113.8   | 132.6   | 0.811943155 | 149.725   | 142.475  | 7.25     | 1.05088612  | 0.8462  | -1.04  |
| 97553_at   | 953.4  | 738.4   | 926.1   | 892.1   | 852.5  | 862.8   | 804.7   | 847.3   | 0.518819865 | 877.5     | 841.825  | 35.675   | 1.042378166 | 0.5568  | -1.038 |
| 97554_at   | 491.9  | 558.1   | 453.7   | 437.4   | 511.1  | 474.2   | 478.6   | 460.5   | 0.892190328 | 485.275   | 481.1    | 4.175    | 1.00867803  | 0.9365  | 1.005  |
| 97555_at   | 8.5    | 9.3     | 7.5     | 4.6     | 23.2   | 8.1     | 3.6     | 8.1     | 0.505977949 | 7.475     | 10.75    | 3.275    | 0.695348837 | 0.6824  | 1.193  |
| 97556_at   | 1939.3 | 1810.6  | 1911.3  | 2084.1  | 1839.1 | 1961.3  | 1964.2  | 1844.2  | 0.629344349 | 1936.325  | 1902.2   | 34.125   | 1.017939754 | 0.6375  | -1.017 |
| 97557_at   | 350.9  | 380.4   | 373.4   | 276.3   | 446.2  | 298     | 294     | 338.6   | 0.981299666 | 345.25    | 344.2    | 1.05     | 1.003050552 | 0.9378  | -1.01  |
| 97559_at   | 9688.8 | 10009.9 | 7688.1  | 7523.9  | 7802.5 | 8279.5  | 7304.5  | 8170.9  | 0.295377832 | 8727.675  | 7889.35  | 838.325  | 1.106260338 | 0.2864  | -1.098 |
| 97560_at   | 211    | 162.1   | 302.9   | 270.3   | 50     | 218.1   | 340.1   | 210.2   | 0.656270457 | 236.575   | 204.6    | 31.975   | 1.156280547 | 0.4941  | -1.377 |
| 97561_at   | 16.1   | 16.4    | 17.9    | 14.2    | 15.3   | 27      | 14.4    | 14.6    | 0.628765128 | 16.15     | 17.825   | 1.675    | 0.906030856 | 0.6993  | 1.066  |
| 97562_r_at | 45.3   | 42.5    | 61.9    | 116.5   | 69.4   | 58.8    | 120.8   | 104.7   | 0.370322996 | 66.55     | 88.425   | 21.875   | 0.752615211 | 0.2947  | 1.389  |
| 97563_f_at | 71.1   | 28.3    | 52.8    | 22.5    | 68.5   | 38.7    | 48.2    | 18.6    | 0.991249221 | 43.675    | 43.5     | 0.175    | 1.004022989 | 0.9924  | 1.004  |
| 97564_f_at | 9.9    | 10.8    | 7.4     | 21.4    | 20.3   | 19.6    | 36.9    | 19.8    | 0.070612646 | 12.375    | 24.15    | 11.775   | 0.51242236  | 0.04064 | 2.033  |
| 97565_r_at | 97.6   | 27.1    | 79.8    | 62.9    | 37.3   | 113.9   | 71.6    | 75.6    | 0.733321709 | 66.85     | 74.6     | 7.75     | 0.896112601 | 0.719   | 1.147  |
| 97566_f_at | 103    | 43.1    | 68.1    | 61.3    | 66.4   | 83.9    | 75.1    | 68.9    | 0.740517482 | 68.875    | 73.575   | 4.7      | 0.936119606 | 0.5766  | 1.117  |
| 97567_f_at | 88     | 163.6   | 115.4   | 146.9   | 120.5  | 92.2    | 85.7    | 152.2   | 0.511047173 | 128.475   | 112.65   | 15.825   | 1.140479361 | 0.52    | -1.139 |
| 97568_at   | 21.2   | 48.8    | 82.4    | 21.6    | 10.7   | 27.3    | 41.7    | 18.4    | 0.296661688 | 43.5      | 24.525   | 18.975   | 1.773700306 | 0.2777  | -1.69  |
| 97569_at   | 56.7   | 8.4     | 14.5    | 30.9    | 38.4   | 58.7    | 40.5    | 24.7    | 0.3588356   | 27.625    | 40.575   | 12.95    | 0.680837954 | 0.2432  | 1.803  |
| 97570_at   | 132.5  | 75      | 78.8    | 71.4    | 60.8   | 130.4   | 78.5    | 108     | 0.820953334 | 89.425    | 94.425   | 5        | 0.947047922 | 0.8419  | 1.047  |
| 97571_r_at | 10     | 7.9     | 4.5     | 5.9     | 5.9    | 6.4     | 9       | 10      | 0.647677983 | 7.075     | 7.825    | 0.75     | 0.904153355 | 0.5957  | 1.129  |
| 97572_at   | 74.5   | 8.4     | 4.6     | 10      | 35.3   | 79.4    | 20.8    | 42.6    | 0.374768406 | 24.375    | 44.525   | 20.15    | 0.547445255 | 0.1447  | 3.046  |
| 97573_at   | 77.3   | 161.4   | 165.7   | 85.4    | 200.4  | 163.4   | 215.5   | 258.5   | 0.031635933 | 122.45    | 209.45   | 87       | 0.584626402 | 0.04044 | 1.793  |
| 97574_f_at | 7.3    | 8.8     | 3.3     | 7.1     | 5.6    | 3.8     | 3.1     | 4       | 0.120673347 | 6.625     | 4.125    | 2.5      | 1.606060606 | 0.1262  | -1.549 |
| 97575_f_at | 10.5   | 12.5    | 20.4    | 24.7    | 9.3    | 27.6    | 2.6     | 33.3    | 0.890316445 | 17.025    | 18.2     | 1.175    | 0.93543956  | 0.6735  | -1.318 |
| 97576_f_at | 8.3    | 8.4     | 5.7     | 11.7    | 4.8    | 11.3    | 17.7    | 6.9     | 0.622686097 | 8.525     | 10.175   | 1.65     | 0.837837838 | 0.7792  | 1.099  |
| 97577_f_at | 48     | 26.7    | 19.7    | 36.7    | 29.8   | 36.7    | 28.1    | 32.8    | 0.893558258 | 32.775    | 31.85    | 0.925    | 1.029042386 | 0.9232  | 1.02   |
| 97578_at   | 25.1   | 17.5    | 5.8     | 17.8    | 6      | 17.3    | 15.3    | 5.8     | 0.321369208 | 16.55     | 11.1     | 5.45     | 1.490990991 | 0.395   | -1.488 |
| 97579_f_at | 203    | 241.6   | 177.1   | 151.5   | 206.7  | 163.5   | 75      | 74.5    | 0.160511349 | 193.3     | 129.925  | 63.375   | 1.487781412 | 0.136   | -1.625 |
| 97580_at   | 6.8    | 8.1     | 14.4    | 5.8     | 6.5    | 7.1     | 14.7    | 13.4    | 0.585650469 | 8.775     | 10.425   | 1.65     | 0.841726619 | 0.5768  | 1.185  |
| 97581_at   | 394.8  | 255.7   | 365.3   | 390.9   | 215.7  | 487.3   | 336.6   | 337.6   | 0.913518079 | 351.675   | 344.3    | 7.375    | 1.021420273 | 0.8183  | -1.048 |
| 97593_f_at | 976.8  | 879.7   | 659.4   | 714.5   | 910.9  | 710.8   | 764.7   | 683.7   | 0.670565053 | 807.6     | 767.525  | 40.075   | 1.052213283 | 0.7006  | -1.046 |
| 97594_r_at | 2097.2 | 1966.8  | 1813.3  | 1688.7  | 1886.3 | 2087.2  | 1468.4  | 1889.9  | 0.724994173 | 1891.5    | 1832.95  | 58.55    | 1.031943043 | 0.6967  | -1.037 |
| 97598_at   | 40.6   | 42      | 28      | 40      | 36.9   | 28.3    | 20      | 45      | 0.455351038 | 37.65     | 32.55    | 5.1      | 1.156682028 | 0.4089  | -1.194 |
| 97601_f_at | 29.6   | 75      | 58.2    | 84      | 61.9   | 99.2    | 50.2    | 28.1    | 0.926074026 | 61.7      | 59.85    | 1.85     | 1.03091061  | 0.8773  | -1.058 |
| 97610_f_at | 53.8   | 50.6    | 32.2    | 12      | 26     | 59.7    | 55.6    | 38.5    | 0.553649057 | 37.15     | 44.95    | 7.8      | 0.82647386  | 0.4949  | 1.333  |
| 97645_f_at | 40.9   | 40.9    | 32.6    | 47.5    | 57.7   | 44.4    | 41.6    | 34.9    | 0.494378787 | 40.475    | 44.65    | 4.175    | 0.906494961 | 0.5102  | 1.095  |
| 97647_at   | 22442  | 24932.1 | 14246.6 | 15428.6 | 18519  | 17285.7 | 16926.4 | 17116.7 | 0.542622183 | 19262.325 | 17461.95 | 1800.375 | 1.103102746 | 0.6297  | -1.073 |
| 97651_at   | 28.9   | 28.9    | 21      | 33.4    | 20.8   | 26.8    | 35.7    | 34      | 0.777315864 | 28.05     | 29.325   | 1.275    | 0.956521739 | 0.8257  | 1.037  |
| 97652_at   | 141.9  | 112.7   | 84.6    | 128.7   | 109.4  | 206     | 88.4    | 132.8   | 0.575985437 | 116.975   | 134.15   | 17.175   | 0.871971673 | 0.6401  | 1.11   |
| 97653_at   | 11.3   | 12.4    | 13.3    | 10.9    | 9.6    | 23.8    | 13.2    | 10.9    | 0.514002529 | 11.975    | 14.375   | 2.4      | 0.833043478 | 0.5724  | 1.131  |
| 97654_at   | 14.8   | 26      | 9.5     | 10.2    | 8.3    | 12      | 19.2    | 10.2    | 0.573974238 | 15.125    | 12.425   | 2.7      | 1.217303823 | 0.5884  | -1.18  |



|            |         |         |         |         |         |         |         |         |             |           |           |         |             |          |        |
|------------|---------|---------|---------|---------|---------|---------|---------|---------|-------------|-----------|-----------|---------|-------------|----------|--------|
| 97655_at   | 11.2    | 8.7     | 3.3     | 6.1     | 3.9     | 7.7     | 3.6     | 5.8     | 0.337912658 | 7.325     | 5.25      | 2.075   | 1.395238095 | 0.4106   | -1.331 |
| 97658_f_at | 65      | 61.1    | 39.7    | 40.2    | 64.8    | 68.2    | 32.3    | 72.7    | 0.511436831 | 51.5      | 59.5      | 8       | 0.865546218 | 0.6114   | 1.132  |
| 97659_r_at | 1164.4  | 1035.9  | 1006    | 969.2   | 935.2   | 1074.3  | 905.1   | 911.3   | 0.183904848 | 1043.875  | 956.475   | 87.4    | 1.091377192 | 0.1718   | -1.091 |
| 97660_s_at | 74.9    | 65      | 52.6    | 56.8    | 47.8    | 76.5    | 58.3    | 62.8    | 0.90374726  | 62.325    | 61.35     | 0.975   | 1.015892421 | 0.8749   | 1.021  |
| 97661_at   | 50.1    | 53.9    | 72.3    | 64.6    | 62.4    | 52.9    | 42      | 64.2    | 0.524882704 | 60.225    | 55.375    | 4.85    | 1.08758465  | 0.5235   | -1.091 |
| 97665_i_at | 63.5    | 130.6   | 95.2    | 165.5   | 130.8   | 115.3   | 138.5   | 168.2   | 0.371967812 | 113.7     | 138.2     | 24.5    | 0.822720695 | 0.3072   | 1.281  |
| 97666_r_at | 183.3   | 136.1   | 202.9   | 390.3   | 251.5   | 313     | 347.6   | 424.3   | 0.170295233 | 228.15    | 334.1     | 105.95  | 0.682879377 | 0.1237   | 1.557  |
| 97667_at   | 3.8     | 2.3     | 2.5     | 5.1     | 1.6     | 4.7     | 2.6     | 18.4    | 0.451260558 | 3.425     | 6.825     | 3.4     | 0.501831502 | 0.6239   | 1.334  |
| 97678_r_at | 1.8     | 0.3     | 0.5     | 6.8     | 0.7     | 0.6     | 0.5     | 4.3     | 0.662644045 | 2.35      | 1.525     | 0.825   | 1.540983607 | 0.9275   | -1.087 |
| 97679_at   | 46      | 96      | 50.7    | 60.1    | 53.5    | 43.9    | 64.6    | 33.8    | 0.327919171 | 63.2      | 48.95     | 14.25   | 1.291113381 | 0.3031   | -1.273 |
| 97680_at   | 36.1    | 40.9    | 26.4    | 33.6    | 27.5    | 34.6    | 26.7    | 27      | 0.196938982 | 34.25     | 28.95     | 5.3     | 1.183074266 | 0.1921   | -1.176 |
| 97681_f_at | 3264.9  | 3169    | 3256.9  | 2960.2  | 3847.6  | 3279.5  | 3552.7  | 3323.6  | 0.075605451 | 3162.75   | 3500.85   | 338.1   | 0.903423454 | 0.05906  | 1.105  |
| 97682_r_at | 239.3   | 304.6   | 312.4   | 397.3   | 271.9   | 579.8   | 349.4   | 443.8   | 0.250109267 | 313.4     | 411.225   | 97.825  | 0.762113198 | 0.2438   | 1.282  |
| 97683_at   | 58.6    | 28.2    | 66.7    | 49.9    | 57.8    | 93.4    | 64.7    | 33.1    | 0.477810119 | 50.85     | 62.25     | 11.4    | 0.81686747  | 0.541    | 1.204  |
| 97684_at   | 141.6   | 171     | 153.1   | 130.9   | 110.9   | 89.3    | 117     | 111.9   | 0.009001013 | 149.15    | 107.275   | 41.875  | 1.390351899 | 0.007359 | -1.391 |
| 97685_at   | 16.1    | 13      | 54.3    | 8.4     | 9.3     | 25.3    | 38.4    | 17.5    | 0.979890118 | 22.95     | 22.625    | 0.325   | 1.014364641 | 0.8121   | 1.132  |
| 97686_r_at | 809.1   | 518.2   | 577.4   | 692.4   | 558.6   | 853.6   | 707.7   | 533.4   | 0.891029239 | 649.275   | 663.325   | 14.05   | 0.978818829 | 0.9078   | 1.018  |
| 97687_at   | 261.1   | 193.8   | 176.8   | 226.8   | 153.3   | 218.3   | 241.9   | 205.5   | 0.721549469 | 214.625   | 204.75    | 9.875   | 1.048229548 | 0.7152   | -1.051 |
| 97688_at   | 11.9    | 10.7    | 7.2     | 25.6    | 12.5    | 27.2    | 14      | 9.8     | 0.729977461 | 13.85     | 15.875    | 2.025   | 0.872440945 | 0.6312   | 1.19   |
| 97689_at   | 148.7   | 239.9   | 165.2   | 202.8   | 255.3   | 181.8   | 155.3   | 193.1   | 0.813920793 | 189.15    | 196.375   | 7.225   | 0.963208148 | 0.8064   | 1.039  |
| 97690_at   | 61.7    | 25.9    | 5.9     | 25.3    | 30.4    | 45.8    | 49.1    | 17.4    | 0.681812468 | 29.7      | 35.675    | 5.975   | 0.832515767 | 0.4857   | 1.496  |
| 97691_at   | 111.9   | 68.5    | 49.4    | 24.7    | 60.7    | 111.2   | 34.6    | 47.7    | 0.997695171 | 63.625    | 63.55     | 0.075   | 1.001180173 | 0.9175   | 1.044  |
| 97692_at   | 1.2     | 1.7     | 1.2     | 2       | 1.7     | 2.1     | 1.1     | 1       | 0.8834636   | 1.525     | 1.475     | 0.05    | 1.033898305 | 0.8569   | -1.043 |
| 97693_at   | 16.1    | 27.6    | 6.2     | 28.5    | 18.8    | 46.9    | 19.1    | 32.6    | 0.297963424 | 19.6      | 29.35     | 9.75    | 0.667802385 | 0.2913   | 1.624  |
| 97694_at   | 95.4    | 94.3    | 75.3    | 99.7    | 75.5    | 126     | 105.9   | 97.9    | 0.431763535 | 91.175    | 101.325   | 10.15   | 0.899827288 | 0.4744   | 1.099  |
| 97695_s_at | 17319.1 | 19600.6 | 13416.2 | 16071.7 | 16446   | 15347.4 | 16329.6 | 16183.1 | 0.714064716 | 16601.9   | 16076.525 | 525.375 | 1.032679637 | 0.7833   | 1.024  |
| 97696_r_at | 19982.9 | 22469.9 | 13599.3 | 16547.4 | 17215.5 | 18746.3 | 17705.5 | 18184.9 | 0.930136364 | 18149.875 | 17963.05  | 186.825 | 1.010400517 | 0.9521   | 1.007  |
| 97697_at   | 9.4     | 9.6     | 5.3     | 5.3     | 4       | 14.9    | 23.6    | 3.4     | 0.466894493 | 7.4       | 11.475    | 4.075   | 0.644880174 | 0.7043   | 1.214  |
| 97698_at   | 4.1     | 3.7     | 1.8     | 13.3    | 12.4    | 10.9    | 13.6    | 13.4    | 0.072794921 | 5.725     | 12.575    | 6.85    | 0.45526839  | 0.0462   | 2.865  |
| 97699_at   | 207.1   | 199.2   | 325.7   | 303.5   | 112.8   | 215     | 291.4   | 168.3   | 0.261159932 | 258.875   | 196.875   | 62      | 1.314920635 | 0.2423   | -1.361 |
| 97700_at   | 159.2   | 64.8    | 91.6    | 134.9   | 80.7    | 150.3   | 117.6   | 105.2   | 0.975542078 | 112.625   | 113.45    | 0.825   | 0.992728074 | 0.8694   | 1.042  |
| 97701_at   | 168.8   | 142.1   | 147.7   | 150     | 170.3   | 186.9   | 177.4   | 141     | 0.205987048 | 152.15    | 168.9     | 16.75   | 0.900828893 | 0.2086   | 1.106  |
| 97702_at   | 39.3    | 15.3    | 16.1    | 50.6    | 65.6    | 72.8    | 41.2    | 21.4    | 0.226703849 | 30.325    | 50.25     | 19.925  | 0.603482587 | 0.2422   | 1.712  |
| 97703_at   | 182     | 176.3   | 269.4   | 318     | 265.7   | 186.2   | 229.6   | 228.2   | 0.824515137 | 236.425   | 227.425   | 9       | 1.039573486 | 0.9308   | 1.015  |
| 97704_at   | 7       | 26      | 31.5    | 41.5    | 5.5     | 7.1     | 45.8    | 32.1    | 0.762801882 | 26.5      | 22.625    | 3.875   | 1.171270718 | 0.6072   | -1.432 |
| 97705_at   | 293.7   | 282.4   | 348.9   | 403.1   | 234.2   | 284.5   | 378.2   | 330.2   | 0.56556958  | 332.025   | 306.775   | 25.25   | 1.08230788  | 0.5444   | -1.088 |
| 97706_at   | 74.2    | 25.1    | 44.1    | 81.8    | 57.1    | 76.2    | 84.4    | 85      | 0.252899862 | 56.3      | 75.675    | 19.375  | 0.743970928 | 0.2303   | 1.468  |
| 97707_at   | 34.6    | 18.3    | 21.1    | 29.5    | 29.9    | 64.6    | 40.7    | 43.6    | 0.075326485 | 25.875    | 44.7      | 18.825  | 0.57885906  | 0.04651  | 1.715  |
| 97708_at   | 35      | 15.4    | 10.8    | 23.2    | 29.7    | 36.9    | 16.9    | 21.2    | 0.491672658 | 21.1      | 26.175    | 5.075   | 0.806112703 | 0.4197   | 1.307  |
| 97709_at   | 13.5    | 3.7     | 1.9     | 13.8    | 11.2    | 4.7     | 8.4     | 3.2     | 0.72631342  | 8.225     | 6.875     | 1.35    | 1.196363636 | 0.9832   | 1.012  |
| 97710_f_at | 200.8   | 334.9   | 394.5   | 325.1   | 394.7   | 245.8   | 383.4   | 305.9   | 0.740577971 | 313.825   | 332.45    | 18.625  | 0.943976538 | 0.7177   | 1.072  |
| 97711_at   | 147.8   | 154.6   | 175.8   | 186.8   | 95      | 165.4   | 333.9   | 248.3   | 0.45618261  | 166.25    | 210.65    | 44.4    | 0.789223831 | 0.6373   | 1.148  |
| 97712_at   | 18.7    | 33.8    | 12.7    | 68.1    | 6.9     | 14.7    | 81      | 63.5    | 0.723805934 | 33.325    | 41.525    | 8.2     | 0.802528597 | 0.9848   | -1.014 |
| 97713_at   | 61.8    | 16.8    | 26.5    | 47.4    | 16.1    | 33.6    | 14.9    | 22.2    | 0.209619392 | 38.125    | 21.7      | 16.425  | 1.756912442 | 0.2015   | -1.643 |
| 97714_r_at | 13      | 12.9    | 12.2    | 9.4     | 10.7    | 10.7    | 9.3     | 13.6    | 0.541777176 | 11.875    | 11.075    | 0.8     | 1.072234763 | 0.5608   | -1.07  |
| 97717_at   | 96      | 80      | 88.7    | 101.9   | 89.5    | 118.4   | 93.5    | 110.6   | 0.228646698 | 91.65     | 103       | 11.35   | 0.889805825 | 0.2254   | 1.121  |
| 97718_at   | 9.1     | 6.2     | 2.7     | 12.1    | 2.4     | 6.4     | 2.9     | 7.3     | 0.292162554 | 7.525     | 4.75      | 2.775   | 1.584210526 | 0.3481   | -1.543 |
| 97719_at   | 197.7   | 187.5   | 174     | 203.2   | 152.5   | 210     | 151.5   | 186.2   | 0.371731189 | 190.6     | 175.05    | 15.55   | 1.088831762 | 0.3244   | -1.098 |
| 97720_at   | 5.6     | 7.2     | 2.7     | 3.1     | 4.1     | 5.4     | 4.2     | 4.1     | 0.867028234 | 4.65      | 4.45      | 0.2     | 1.04494382  | 0.8932   | 1.035  |
| 97721_at   | 7.3     | 11.4    | 6.8     | 5.3     | 8.8     | 10.7    | 8.4     | 3.9     | 0.901872961 | 7.7       | 7.95      | 0.25    | 0.968553459 | 0.9743   | 1.009  |
| 97722_at   | 910.5   | 769.5   | 845.3   | 688.8   | 433.2   | 764.5   | 884.2   | 711.9   | 0.376003267 | 803.525   | 698.45    | 105.075 | 1.150440261 | 0.3516   | -1.183 |
| 97723_at   | 157.6   | 129.5   | 129.2   | 111.2   | 43.6    | 159.5   | 128.6   | 150.3   | 0.707717889 | 131.875   | 120.5     | 11.375  | 1.09439834  | 0.5563   | -1.215 |
| 97724_at   | 213.6   | 128.5   | 179.4   | 211.5   | 80.4    | 180.2   | 189.5   | 184.4   | 0.483534362 | 183.25    | 158.625   | 24.625  | 1.155240347 | 0.4803   | -1.198 |
| 97725_at   | 34.4    | 24.6    | 12.5    | 23.9    | 29.3    | 38.9    | 28.9    | 15.3    | 0.543774348 | 23.85     | 28.1      | 4.25    | 0.848754448 | 0.5722   | 1.188  |
| 97726_at   | 182.7   | 205.2   | 217.8   | 207.7   | 162.6   | 197.9   | 141.4   | 148.6   | 0.039464135 | 203.35    | 162.625   | 40.725  | 1.250422752 | 0.03242  | -1.258 |
| 97727_at   | 134.9   | 113.2   | 83.7    | 59.5    | 80.8    | 172.7   | 126.5   | 108.9   | 0.374570575 | 97.825    | 122.225   | 24.4    | 0.800368173 | 0.3703   | 1.261  |



|            |        |         |        |        |        |        |        |        |             |          |          |         |             |          |        |
|------------|--------|---------|--------|--------|--------|--------|--------|--------|-------------|----------|----------|---------|-------------|----------|--------|
| 97728_at   | 8.3    | 9.9     | 6.5    | 6.7    | 6.2    | 9.3    | 6.6    | 7.3    | 0.651225327 | 7.85     | 7.35     | 0.5     | 1.068027211 | 0.6514   | -1.064 |
| 97729_at   | 27.1   | 16      | 11.8   | 12     | 3      | 9.4    | 8.2    | 7.3    | 0.0664317   | 16.725   | 6.975    | 9.75    | 2.397849462 | 0.03181  | -2.467 |
| 97730_at   | 30.8   | 27.2    | 18.2   | 31.1   | 49.5   | 34.6   | 83.9   | 90     | 0.063607775 | 26.825   | 64.5     | 37.675  | 0.415891473 | 0.01908  | 2.284  |
| 97731_at   | 16.9   | 20      | 17.3   | 21     | 17.3   | 21.6   | 9.8    | 3.5    | 0.248869699 | 18.8     | 13.05    | 5.75    | 1.440613027 | 0.2168   | -1.756 |
| 97732_at   | 49.4   | 50.1    | 63.4   | 65.7   | 80.3   | 65.2   | 16.4   | 108.2  | 0.631871737 | 57.15    | 67.525   | 10.375  | 0.846353203 | 0.9523   | -1.027 |
| 97733_at   | 19.2   | 13.5    | 14.8   | 16.6   | 8.3    | 16.9   | 9.2    | 18.6   | 0.390146441 | 16.025   | 13.25    | 2.775   | 1.209433962 | 0.3074   | -1.279 |
| 97734_at   | 63.2   | 15.4    | 27.5   | 14.7   | 13.2   | 69.4   | 43.7   | 36.3   | 0.543658382 | 30.2     | 40.65    | 10.45   | 0.742927429 | 0.5296   | 1.385  |
| 97735_at   | 4.8    | 5.7     | 2.9    | 4.9    | 4.4    | 7.3    | 3.6    | 11.1   | 0.327454545 | 4.575    | 6.6      | 2.025   | 0.693181818 | 0.3443   | 1.346  |
| 97736_at   | 65     | 28.2    | 53.2   | 42.5   | 34.2   | 74.5   | 44.3   | 27.8   | 0.881425499 | 47.225   | 45.2     | 2.025   | 1.044800885 | 0.8104   | -1.072 |
| 97737_f_at | 212.9  | 203.8   | 221.4  | 293.4  | 172.9  | 172.1  | 197.8  | 256.1  | 0.288022663 | 232.875  | 199.725  | 33.15   | 1.16597822  | 0.255    | -1.169 |
| 97738_r_at | 270.3  | 246     | 323.1  | 411.8  | 292.5  | 374.4  | 290.2  | 283.9  | 0.954584372 | 312.8    | 310.25   | 2.55    | 1.008219178 | 0.9715   | 1.005  |
| 97739_at   | 5.6    | 6.4     | 12.3   | 7.7    | 3.8    | 4.6    | 5      | 8.5    | 0.220896808 | 8        | 5.475    | 2.525   | 1.461187215 | 0.1741   | -1.454 |
| 97740_at   | 347.2  | 297.6   | 437.1  | 435.5  | 365.5  | 377.5  | 452.7  | 429.5  | 0.532678164 | 379.35   | 406.3    | 26.95   | 0.933669702 | 0.4948   | 1.081  |
| 97741_at   | 13.1   | 13.5    | 11.1   | 44.6   | 41.4   | 17.4   | 6.9    | 50     | 0.54193826  | 20.575   | 28.925   | 8.35    | 0.711322385 | 0.6518   | 1.301  |
| 97742_s_at | 5.2    | 5.1     | 3.2    | 4.1    | 4.1    | 5.4    | 4.5    | 3.1    | 0.858158336 | 4.4      | 4.275    | 0.125   | 1.029239766 | 0.8412   | -1.035 |
| 97743_at   | 1114.5 | 804.4   | 1135.6 | 971.7  | 810.8  | 1214.8 | 1018.5 | 902.5  | 0.869513598 | 1006.55  | 986.65   | 19.9    | 1.02016926  | 0.8569   | -1.022 |
| 97744_at   | 479.9  | 376     | 323    | 315.5  | 313.2  | 488.3  | 427.4  | 388.6  | 0.580812605 | 373.6    | 404.375  | 30.775  | 0.9238949   | 0.5693   | 1.084  |
| 97745_at   | 28.4   | 17.7    | 17.9   | 18     | 15.9   | 32.3   | 23.3   | 19.5   | 0.628723881 | 20.5     | 22.75    | 2.25    | 0.901098901 | 0.6551   | 1.093  |
| 97746_f_at | 21.4   | 0.9     | 12.3   | 7      | 2      | 31.6   | 2.1    | 1.9    | 0.911898185 | 10.4     | 9.4      | 1       | 1.106382979 | 0.658    | -1.581 |
| 97747_r_at | 776    | 708.9   | 657.5  | 568.5  | 631.3  | 748.2  | 563.5  | 545.5  | 0.41440542  | 677.725  | 622.125  | 55.6    | 1.089371107 | 0.4047   | -1.091 |
| 97748_at   | 10.5   | 7.2     | 2.8    | 7.3    | 4.4    | 5.9    | 11     | 23.8   | 0.411046731 | 6.95     | 11.275   | 4.325   | 0.616407982 | 0.4556   | 1.454  |
| 97749_at   | 29     | 39.8    | 46.1   | 51.9   | 33.9   | 44.5   | 19.2   | 30.6   | 0.226153792 | 41.7     | 32.05    | 9.65    | 1.301092044 | 0.2347   | -1.329 |
| 97750_at   | 5725   | 7219.1  | 5514.5 | 4802.7 | 6057.6 | 5330   | 4761.4 | 5103.1 | 0.427109265 | 5815.325 | 5313.025 | 502.3   | 1.094541245 | 0.4307   | -1.087 |
| 97751_f_at | 880.9  | 1181.2  | 745.7  | 867.2  | 822.1  | 990.2  | 784.5  | 907.8  | 0.699610309 | 918.75   | 876.15   | 42.6    | 1.048621811 | 0.7447   | -1.038 |
| 97752_at   | 36     | 3.7     | 16.2   | 33.5   | 25.6   | 31.4   | 16     | 31.7   | 0.672793863 | 22.35    | 26.175   | 3.825   | 0.853868195 | 0.4632   | 1.542  |
| 97753_at   | 34.4   | 6.4     | 19.1   | 9.3    | 29.8   | 9.2    | 6.3    | 68.9   | 0.513600012 | 17.3     | 28.55    | 11.25   | 0.605954466 | 0.6871   | 1.324  |
| 97754_at   | 80.7   | 54.9    | 51.2   | 51.9   | 65.4   | 85.8   | 45.4   | 72.3   | 0.51825509  | 59.675   | 67.225   | 7.55    | 0.887690591 | 0.5386   | 1.119  |
| 97755_at   | 251    | 174     | 195.3  | 197.8  | 184.9  | 329.4  | 199    | 179.6  | 0.657142073 | 204.525  | 223.225  | 18.7    | 0.916228021 | 0.7075   | 1.066  |
| 97756_s_at | 14     | 27.6    | 8.7    | 8.7    | 38.3   | 22.5   | 36.8   | 60.9   | 0.043712396 | 14.75    | 39.625   | 24.875  | 0.372239748 | 0.02169  | 2.855  |
| 97757_at   | 5.1    | 17.9    | 2.6    | 4.8    | 3.5    | 26.1   | 3.6    | 18.5   | 0.457604001 | 7.6      | 12.925   | 5.325   | 0.588007737 | 0.5554   | 1.519  |
| 97758_at   | 9732.4 | 10363.7 | 7643   | 8491.7 | 8016.2 | 9615.9 | 9564.9 | 9277.8 | 0.93551934  | 9057.7   | 9118.7   | 61      | 0.99331045  | 0.8962   | 1.011  |
| 97759_at   | 277    | 269.8   | 218.8  | 327.7  | 230.2  | 310.7  | 399.1  | 375.2  | 0.26333607  | 273.325  | 328.8    | 55.475  | 0.831280414 | 0.289    | 1.189  |
| 97760_at   | 41.1   | 13      | 28.7   | 48.9   | 3.8    | 23.2   | 85.6   | 29.8   | 0.895834901 | 32.925   | 35.6     | 2.675   | 0.924859551 | 0.6867   | -1.35  |
| 97761_f_at | 57.4   | 44.4    | 55.8   | 62.6   | 38.7   | 85.4   | 42     | 49.6   | 0.92644126  | 55.05    | 53.925   | 1.125   | 1.020862309 | 0.7488   | -1.067 |
| 97762_f_at | 62.1   | 38.8    | 33     | 28.1   | 26.1   | 55.1   | 21.4   | 24.4   | 0.451579494 | 40.5     | 31.75    | 8.75    | 1.275590551 | 0.3574   | -1.313 |
| 97763_at   | 101.6  | 82.3    | 75.7   | 28.3   | 73.7   | 91.1   | 104.2  | 59.3   | 0.606499688 | 71.975   | 82.075   | 10.1    | 0.876941822 | 0.5236   | 1.234  |
| 97764_at   | 2      | 1.3     | 2.2    | 11.6   | 1.5    | 9.4    | 8.5    | 4.7    | 0.588811857 | 4.275    | 6.025    | 1.75    | 0.709543568 | 0.4355   | 1.711  |
| 97765_g_at | 10.5   | 6.4     | 2.7    | 4.4    | 3.2    | 6      | 3.5    | 16.8   | 0.721014453 | 6        | 7.375    | 1.375   | 0.813559322 | 0.856    | 1.095  |
| 97766_at   | 25.2   | 22.8    | 2.1    | 2.4    | 3.2    | 5.7    | 3.6    | 3.8    | 0.246389492 | 13.125   | 4.075    | 9.05    | 3.220858896 | 0.4265   | -1.819 |
| 97767_at   | 536.9  | 390.7   | 352.6  | 443    | 396.1  | 525    | 407    | 286.7  | 0.682575849 | 430.8    | 403.7    | 27.1    | 1.067129056 | 0.6419   | -1.078 |
| 97768_at   | 16.9   | 7.7     | 15.3   | 16.4   | 21.6   | 28.3   | 31.8   | 28.9   | 0.004298416 | 14.075   | 27.65    | 13.575  | 0.509041591 | 0.01341  | 2.036  |
| 97769_at   | 52.7   | 50.5    | 45.7   | 54.6   | 37.5   | 89.2   | 49.2   | 66.7   | 0.451504063 | 50.875   | 60.65    | 9.775   | 0.838829349 | 0.5351   | 1.134  |
| 97770_s_at | 794.6  | 959.1   | 898.1  | 1047.1 | 894.7  | 853    | 1033.2 | 888.7  | 0.915865935 | 924.725  | 917.4    | 7.325   | 1.007984521 | 0.9398   | 1.006  |
| 97771_r_at | 53     | 23.8    | 29.2   | 64.2   | 32.3   | 33.5   | 7.8    | 40.3   | 0.287221904 | 42.55    | 28.475   | 14.075  | 1.49429324  | 0.3205   | -1.625 |
| 97772_at   | 95.2   | 58.1    | 103.9  | 66.6   | 70.4   | 108    | 88.6   | 50.6   | 0.928292872 | 80.95    | 79.4     | 1.55    | 1.019521411 | 0.8975   | -1.029 |
| 97773_at   | 788.4  | 788.1   | 926    | 648.7  | 696.1  | 960.4  | 1495.7 | 921.5  | 0.272149461 | 787.8    | 1018.425 | 230.625 | 0.773547389 | 0.2421   | 1.253  |
| 97774_at   | 10.2   | 6.9     | 4.3    | 5.3    | 7.5    | 10.7   | 6.9    | 6      | 0.530324391 | 6.675    | 7.775    | 1.1     | 0.8585209   | 0.4596   | 1.192  |
| 97775_at   | 123.7  | 37.5    | 74.9   | 76.9   | 77.3   | 160.1  | 78.9   | 86.5   | 0.431512318 | 78.25    | 100.7    | 22.45   | 0.777060576 | 0.3753   | 1.333  |
| 97776_at   | 69.1   | 73.1    | 55.6   | 54.5   | 60.9   | 95.6   | 70.2   | 67.6   | 0.292989065 | 63.075   | 73.575   | 10.5    | 0.857288481 | 0.272    | 1.16   |
| 97777_at   | 17.2   | 19.4    | 13.6   | 20.6   | 15     | 12.7   | 13.7   | 18.5   | 0.221932759 | 17.7     | 14.975   | 2.725   | 1.18196995  | 0.2229   | -1.18  |
| 97778_at   | 24.5   | 44.6    | 63.1   | 22.3   | 6.4    | 16.8   | 40.5   | 32.1   | 0.278169089 | 38.625   | 23.95    | 14.675  | 1.612734864 | 0.2602   | -1.817 |
| 97779_at   | 12.6   | 3.6     | 5.8    | 4.2    | 12.8   | 11.7   | 27.2   | 6.4    | 0.175452947 | 6.55     | 14.525   | 7.975   | 0.450946644 | 0.09982  | 2.197  |
| 97780_at   | 24.6   | 24.3    | 5.7    | 27.7   | 17.9   | 49.3   | 27.7   | 5.3    | 0.690787148 | 20.575   | 25.05    | 4.475   | 0.821357285 | 0.901    | 1.082  |
| 97781_at   | 5.2    | 4.3     | 3.6    | 5.4    | 11.5   | 7.6    | 10.6   | 14.5   | 0.016223075 | 4.625    | 11.05    | 6.425   | 0.418552036 | 0.001747 | 2.377  |
| 97782_at   | 138.5  | 112.2   | 65.3   | 52.4   | 108.1  | 194.8  | 109.3  | 120.9  | 0.203673428 | 92.1     | 133.275  | 41.175  | 0.691052335 | 0.1716   | 1.512  |
| 97783_at   | 2355.1 | 3812.9  | 2306.2 | 2155.9 | 4837.6 | 3084.4 | 2220.8 | 2770.1 | 0.440868048 | 2657.525 | 3228.225 | 570.7   | 0.823215544 | 0.4231   | 1.197  |



|            |        |        |        |        |        |        |        |        |             |          |          |         |             |          |        |
|------------|--------|--------|--------|--------|--------|--------|--------|--------|-------------|----------|----------|---------|-------------|----------|--------|
| 97784_at   | 141.4  | 108.6  | 62.6   | 116.9  | 107.6  | 142.1  | 87.5   | 118.6  | 0.755077573 | 107.375  | 113.95   | 6.575   | 0.942299254 | 0.6833   | 1.09   |
| 97785_at   | 80.4   | 89.4   | 51.1   | 64.1   | 92.3   | 59.8   | 76     | 81.6   | 0.592071349 | 71.25    | 77.425   | 6.175   | 0.920245399 | 0.564    | 1.099  |
| 97786_at   | 149.7  | 77.9   | 103.3  | 92.9   | 107.1  | 184.7  | 129.4  | 101.7  | 0.352137592 | 105.95   | 130.725  | 24.775  | 0.810480015 | 0.3166   | 1.235  |
| 97787_at   | 45.6   | 40.2   | 42.1   | 38.4   | 31.8   | 40.4   | 38.8   | 32.4   | 0.081799539 | 41.575   | 35.85    | 5.725   | 1.159693166 | 0.07839  | -1.163 |
| 97788_at   | 95.9   | 88     | 47.6   | 103.1  | 119.5  | 169.3  | 77.1   | 126    | 0.139963452 | 83.65    | 122.975  | 39.325  | 0.680219557 | 0.1561   | 1.476  |
| 97789_at   | 29.9   | 21.6   | 23     | 22.8   | 14.3   | 32.9   | 19.6   | 21.9   | 0.644694283 | 24.325   | 22.175   | 2.15    | 1.096956032 | 0.5149   | -1.138 |
| 97790_s_at | 333.2  | 317.2  | 301.7  | 406.1  | 242.2  | 246.2  | 274.5  | 276.1  | 0.033592058 | 339.55   | 259.75   | 79.8    | 1.307218479 | 0.01184  | -1.301 |
| 97791_at   | 796.9  | 512.8  | 947.8  | 1019.1 | 527.3  | 610.6  | 635.1  | 574.5  | 0.128288298 | 819.15   | 586.875  | 232.275 | 1.395782748 | 0.1059   | -1.354 |
| 97792_at   | 51.2   | 37.4   | 37.3   | 43     | 27.9   | 31.8   | 19.8   | 10.4   | 0.016836176 | 42.225   | 22.475   | 19.75   | 1.878754171 | 0.03512  | -2.026 |
| 97793_at   | 13.3   | 12     | 24.9   | 32.6   | 5.2    | 28.3   | 56.8   | 26.1   | 0.509840176 | 20.7     | 29.1     | 8.4     | 0.711340206 | 0.8251   | 1.138  |
| 97794_at   | 133.9  | 126.3  | 136.8  | 114.8  | 72.8   | 115    | 155.2  | 135.3  | 0.674265704 | 127.95   | 119.575  | 8.375   | 1.070039724 | 0.5644   | -1.109 |
| 97795_at   | 32.5   | 40.9   | 35.6   | 12.4   | 27.3   | 38.9   | 46.6   | 39     | 0.350229431 | 30.35    | 37.95    | 7.6     | 0.799736495 | 0.353    | 1.344  |
| 97796_at   | 63.3   | 35.8   | 58.1   | 61.3   | 38.3   | 37.3   | 42.7   | 56.1   | 0.208470175 | 54.625   | 43.6     | 11.025  | 1.252866972 | 0.238    | -1.239 |
| 97797_at   | 1984.8 | 2055.1 | 1878   | 1845.6 | 2211.8 | 2076.5 | 1829.6 | 1946.4 | 0.468087531 | 1940.875 | 2016.075 | 75.2    | 0.9626998   | 0.4753   | 1.037  |
| 97798_at   | 608.4  | 630.9  | 547.9  | 510.2  | 678.2  | 505.6  | 473.3  | 582.4  | 0.797012964 | 574.35   | 559.875  | 14.475  | 1.025853985 | 0.7461   | -1.032 |
| 97800_at   | 656    | 762.5  | 719.9  | 662    | 611.6  | 632    | 569.3  | 614.8  | 0.025838701 | 700.1    | 606.925  | 93.175  | 1.153519792 | 0.0153   | -1.152 |
| 97802_at   | 396.9  | 386.7  | 283    | 379.7  | 332.9  | 259.1  | 338.4  | 312.7  | 0.170206418 | 361.575  | 310.775  | 50.8    | 1.163462312 | 0.1904   | -1.159 |
| 97803_at   | 1563.8 | 1529.8 | 1347.5 | 1222.7 | 1392.3 | 1373.3 | 1336.7 | 1190.4 | 0.362457706 | 1415.95  | 1323.175 | 92.775  | 1.070115442 | 0.3759   | -1.067 |
| 97807_at   | 929.2  | 1102.5 | 913.6  | 963.5  | 1081.1 | 773.6  | 1003.6 | 1159   | 0.785002079 | 977.2    | 1004.325 | 27.125  | 0.97299181  | 0.8533   | 1.019  |
| 97808_at   | 2410.7 | 2774.1 | 1974.8 | 3426.8 | 2504.3 | 2141.7 | 3752.8 | 3368.5 | 0.564528746 | 2646.6   | 2941.825 | 295.225 | 0.899645628 | 0.5827   | 1.106  |
| 97809_at   | 1053.1 | 1314   | 1660.9 | 1557.8 | 1315.5 | 1269.9 | 1038.4 | 1357.8 | 0.373734931 | 1396.45  | 1245.4   | 151.05  | 1.121286334 | 0.4108   | -1.11  |
| 97811_at   | 503.5  | 417.8  | 474    | 463.5  | 493.5  | 624.1  | 321.8  | 723.5  | 0.449713514 | 464.7    | 540.725  | 76.025  | 0.859401729 | 0.5665   | 1.116  |
| 97812_at   | 202.9  | 206.3  | 342.2  | 539.1  | 348.2  | 241.9  | 279.9  | 367.6  | 0.883403084 | 322.625  | 309.4    | 13.225  | 1.042744021 | 0.9128   | 1.029  |
| 97813_at   | 1115.7 | 1385.5 | 1823.7 | 1904.9 | 1054.4 | 976.8  | 1039.6 | 1106.5 | 0.068994262 | 1557.45  | 1044.325 | 513.125 | 1.491346085 | 0.02549  | -1.459 |
| 97814_at   | 243.5  | 209    | 168.1  | 182.7  | 188.3  | 280.5  | 166.1  | 209    | 0.746612067 | 200.825  | 210.975  | 10.15   | 0.951890034 | 0.7815   | 1.041  |
| 97816_at   | 158.3  | 217.6  | 250    | 338    | 324.8  | 219    | 278.9  | 349    | 0.315746984 | 240.975  | 292.925  | 51.95   | 0.822650849 | 0.2935   | 1.242  |
| 97817_at   | 1159.1 | 957.6  | 1353.8 | 1325   | 1096.3 | 772.4  | 943.8  | 1071.1 | 0.102366922 | 1198.875 | 970.9    | 227.975 | 1.23480791  | 0.1111   | -1.235 |
| 97818_at   | 3282.7 | 2939.1 | 2879.2 | 2693.6 | 3119.3 | 3517.5 | 2802.8 | 2889.1 | 0.53393051  | 2948.65  | 3082.175 | 133.525 | 0.95667832  | 0.5347   | 1.044  |
| 97819_at   | 1263.6 | 1283.4 | 1166.3 | 907.9  | 1079.7 | 1000.7 | 983    | 1015.8 | 0.215270919 | 1155.3   | 1019.8   | 135.5   | 1.13286919  | 0.209    | -1.123 |
| 97820_at   | 780.8  | 753.8  | 804.7  | 642.5  | 684.4  | 701.9  | 735    | 685.5  | 0.316760495 | 745.45   | 701.7    | 43.75   | 1.062348582 | 0.3201   | -1.059 |
| 97821_at   | 282.4  | 350.5  | 441.1  | 428    | 441.1  | 357.7  | 391    | 375.5  | 0.717948836 | 375.5    | 391.325  | 15.825  | 0.959560468 | 0.6502   | 1.055  |
| 97822_at   | 758.5  | 392.7  | 606.8  | 629    | 432.4  | 578.3  | 581.8  | 519.2  | 0.453633537 | 596.75   | 527.925  | 68.825  | 1.130368897 | 0.5355   | -1.108 |
| 97823_g_at | 798.4  | 687.9  | 672.5  | 642.7  | 533.9  | 784.9  | 573.3  | 574.2  | 0.2628641   | 700.375  | 616.575  | 83.8    | 1.135912095 | 0.2155   | -1.145 |
| 97824_at   | 3030   | 3603.7 | 2704.1 | 2091.5 | 3077.5 | 2956.3 | 2190.3 | 2320.7 | 0.590251302 | 2857.325 | 2636.2   | 221.125 | 1.083880206 | 0.6297   | -1.075 |
| 97825_at   | 12.7   | 74.3   | 91.5   | 92.2   | 126.3  | 71.5   | 67.9   | 105.5  | 0.328131499 | 67.675   | 92.8     | 25.125  | 0.729256466 | 0.3379   | 1.689  |
| 97826_at   | 142    | 88.4   | 82.1   | 96.6   | 93.9   | 123.5  | 114.9  | 109.1  | 0.616002132 | 102.275  | 110.35   | 8.075   | 0.926823743 | 0.509    | 1.099  |
| 97828_at   | 3716.1 | 3926.4 | 2682.8 | 2281.6 | 3128.5 | 2712.8 | 1753.1 | 2147   | 0.205310163 | 3151.725 | 2435.35  | 716.375 | 1.294156897 | 0.2084   | -1.293 |
| 97829_at   | 953.7  | 930.6  | 994    | 850.4  | 993.1  | 911.7  | 966.2  | 861.2  | 0.984103662 | 932.175  | 933.05   | 0.875   | 0.999062215 | 0.983    | 1.001  |
| 97830_at   | 238.5  | 143    | 150.3  | 262.6  | 199.5  | 275.1  | 153.8  | 210.8  | 0.786061152 | 198.6    | 209.8    | 11.2    | 0.946615825 | 0.7346   | 1.072  |
| 97832_at   | 75.6   | 50.5   | 57.8   | 66.7   | 33.5   | 52.2   | 55.2   | 46.7   | 0.073707702 | 62.65    | 46.9     | 15.75   | 1.335820896 | 0.08261  | -1.343 |
| 97833_at   | 62.5   | 66.3   | 85.6   | 95.6   | 76.4   | 80.8   | 56.5   | 79.3   | 0.677943533 | 77.5     | 73.25    | 4.25    | 1.058020478 | 0.713    | -1.052 |
| 97834_g_at | 42.8   | 58.4   | 72.9   | 61.8   | 75.9   | 75.5   | 89.1   | 65.2   | 0.072089328 | 58.975   | 76.425   | 17.45   | 0.771671573 | 0.07953  | 1.311  |
| 97835_at   | 2445.6 | 3581   | 2227.6 | 2248.7 | 2657.4 | 2535   | 1931.5 | 2170.2 | 0.44675409  | 2625.725 | 2323.525 | 302.2   | 1.130061006 | 0.4419   | -1.116 |
| 97836_at   | 328.5  | 440.3  | 486.8  | 653.3  | 601.2  | 507.4  | 557.1  | 661.2  | 0.230422135 | 477.225  | 581.725  | 104.5   | 0.820361855 | 0.1937   | 1.25   |
| 97838_at   | 1613.8 | 1940.7 | 1700.1 | 1928.6 | 2272.4 | 1832   | 1657.3 | 2010.8 | 0.384975904 | 1795.8   | 1943.125 | 147.325 | 0.924181409 | 0.3919   | 1.078  |
| 97839_at   | 4256.4 | 4362.2 | 4174.6 | 4094.6 | 4450.5 | 4056.7 | 4490.6 | 3926.8 | 0.954711264 | 4221.95  | 4231.15  | 9.2     | 0.99782565  | 0.9839   | 1.001  |
| 97841_at   | 1746.4 | 1906.7 | 1637.1 | 1558.1 | 1964.9 | 1535.1 | 1636.4 | 1643.1 | 0.890958471 | 1712.075 | 1694.875 | 17.2    | 1.010148241 | 0.8718   | -1.012 |
| 97843_at   | 1230.1 | 1856   | 1783.7 | 1700.1 | 2030.5 | 1680.2 | 1748.7 | 1740.8 | 0.376510036 | 1642.475 | 1800.05  | 157.575 | 0.912460765 | 0.3626   | 1.107  |
| 97844_at   | 1048.1 | 1127   | 990.2  | 990.8  | 2355.5 | 1490.5 | 1764.3 | 1794.3 | 0.019062543 | 1039.025 | 1851.15  | 812.125 | 0.561286227 | 0.001282 | 1.76   |
| 97845_at   | 1041.2 | 1036.4 | 1127.2 | 1058.4 | 1045.3 | 954.2  | 921.5  | 1107.5 | 0.277918934 | 1065.8   | 1007.125 | 58.675  | 1.058259898 | 0.2517   | -1.06  |
| 97846_at   | 1223.9 | 1205.3 | 1147.8 | 1119.2 | 1366.1 | 1148.2 | 1228   | 1167.9 | 0.380605077 | 1174.05  | 1227.55  | 53.5    | 0.956417254 | 0.3706   | 1.044  |
| 97847_at   | 536.4  | 462.1  | 457.9  | 476.9  | 360.3  | 470.1  | 364.8  | 473.9  | 0.13243951  | 483.325  | 417.275  | 66.05   | 1.158288898 | 0.1191   | -1.166 |
| 97848_at   | 323.8  | 219.1  | 328.2  | 482.4  | 406.4  | 357.8  | 439.5  | 487.5  | 0.230191302 | 338.375  | 422.8    | 84.425  | 0.8003193   | 0.1928   | 1.29   |
| 97849_at   | 81.8   | 56.2   | 44.7   | 46.1   | 25.2   | 100.5  | 79.7   | 41.8   | 0.82177654  | 57.2     | 61.8     | 4.6     | 0.925566343 | 0.9376   | -1.028 |
| 97853_at   | 655.5  | 743.2  | 873.7  | 1003.6 | 853    | 789    | 855.1  | 923.9  | 0.67883197  | 819      | 855.25   | 36.25   | 0.957614733 | 0.5984   | 1.056  |
| 97857_at   | 507.7  | 544.3  | 567.1  | 540.7  | 545.4  | 512    | 534.2  | 519.1  | 0.431705993 | 539.95   | 527.675  | 12.275  | 1.023262425 | 0.4349   | 1.023  |



|            |        |        |        |        |        |        |        |        |             |          |          |             |             |          |        |
|------------|--------|--------|--------|--------|--------|--------|--------|--------|-------------|----------|----------|-------------|-------------|----------|--------|
| 97858_at   | 763.9  | 743.3  | 810.5  | 721    | 684.2  | 721.8  | 822.9  | 753.7  | 0.70513019  | 759.675  | 745.65   | 14.025      | 1.018809093 | 0.6802   | 1.02   |
| 97859_at   | 1170.7 | 1022.8 | 1380.6 | 1318.8 | 1136.4 | 1333.8 | 1252.7 | 1432.8 | 0.543482981 | 1223.225 | 1288.925 | 65.7        | 0.94902729  | 0.5307   | 1.057  |
| 97860_at   | 590.5  | 510.8  | 495.4  | 413.2  | 381.1  | 659    | 408.6  | 468.8  | 0.763021987 | 502.475  | 479.375  | 23.1        | 1.048187744 | 0.6757   | -1.064 |
| 97861_at   | 35.8   | 17.3   | 24.2   | 28.2   | 15.6   | 46.7   | 39.4   | 29.1   | 0.454573805 | 26.375   | 32.7     | 6.325       | 0.806574924 | 0.5743   | 1.185  |
| 97862_s_at | 802.2  | 697.1  | 679.6  | 644.2  | 667.5  | 668.2  | 774.5  | 658.1  | 0.76522113  | 705.775  | 692.075  | 13.7        | 1.019795542 | 0.7701   | -1.019 |
| 97863_at   | 490.9  | 430.6  | 620.1  | 687    | 503.9  | 512.2  | 637.5  | 628.9  | 0.852639354 | 557.15   | 570.625  | 13.475      | 0.976385542 | 0.7895   | 1.035  |
| 97864_at   | 196    | 162.7  | 187.8  | 190    | 184.3  | 220.2  | 204.2  | 177.6  | 0.348220397 | 184.125  | 196.575  | 12.45       | 0.936665395 | 0.3551   | 1.066  |
| 97865_g_at | 1366.8 | 1332.9 | 1331   | 1168.8 | 1197.1 | 1726.3 | 1232.1 | 1264.4 | 0.699629759 | 1299.875 | 1354.975 | 55.1        | 0.959335043 | 0.7418   | 1.032  |
| 97866_at   | 1525   | 1970.6 | 1698.4 | 1628.1 | 2126.4 | 2100   | 1913.1 | 1899.6 | 0.042170665 | 1705.525 | 2009.775 | 304.25      | 0.848614895 | 0.0357   | 1.182  |
| 97867_at   | 90     | 91.7   | 80.5   | 14     | 51.6   | 76.9   | 45.1   | 62.8   | 0.642507674 | 69.05    | 59.1     | 9.95        | 1.168358714 | 0.9231   | 1.049  |
| 97868_at   | 617.7  | 564.8  | 855.3  | 1041.5 | 672.8  | 892.4  | 991.8  | 962.9  | 0.440530925 | 769.825  | 879.975  | 110.15      | 0.874825989 | 0.3964   | 1.165  |
| 97869_at   | 901    | 654.1  | 730.4  | 692.6  | 967.8  | 774.8  | 792.6  | 676    | 0.501860489 | 744.525  | 802.8    | 58.275      | 0.927410314 | 0.4909   | 1.077  |
| 97870_s_at | 774.7  | 553.7  | 634.2  | 642.1  | 530.5  | 876.5  | 688.1  | 509.6  | 1           | 651.175  | 651.175  | 1.13687E-13 | 1           | 0.9086   | -1.017 |
| 97871_at   | 658.8  | 597.5  | 673    | 693.1  | 596.6  | 906    | 767.3  | 637.3  | 0.391151646 | 655.6    | 726.8    | 71.2        | 0.902036324 | 0.3965   | 1.095  |
| 97873_at   | 358.6  | 227.8  | 206.4  | 176.4  | 240.9  | 428.9  | 204.2  | 256.4  | 0.553884647 | 242.3    | 282.6    | 40.3        | 0.857395612 | 0.5238   | 1.161  |
| 97874_at   | 743.3  | 1047.3 | 947.4  | 733.4  | 1301.7 | 952.5  | 880.3  | 811.1  | 0.413043239 | 867.85   | 986.4    | 118.55      | 0.879815491 | 0.4011   | 1.131  |
| 97875_at   | 1554.3 | 1266.1 | 1654.8 | 1499.8 | 1515.5 | 1521.3 | 1112.2 | 1426.6 | 0.461635686 | 1493.75  | 1393.9   | 99.85       | 1.071633546 | 0.4696   | -1.075 |
| 97876_at   | 1306.9 | 1619.5 | 1199.7 | 1371.2 | 1515.7 | 1039.3 | 1257.9 | 1049.3 | 0.311744663 | 1374.325 | 1215.55  | 158.775     | 1.130619884 | 0.2827   | -1.138 |
| 97880_at   | 914    | 936.2  | 1542.6 | 1212   | 949.2  | 856    | 1432.4 | 962.6  | 0.624562957 | 1151.2   | 1050.05  | 101.15      | 1.096328746 | 0.6137   | -1.093 |
| 97882_at   | 3506.2 | 3143.8 | 2941.2 | 2669.3 | 3361.9 | 3610   | 2699.2 | 2972.7 | 0.733367564 | 3065.125 | 3160.95  | 95.825      | 0.969684747 | 0.7442   | 1.03   |
| 97884_at   | 1293.8 | 1510.1 | 1042.3 | 1034.7 | 1325.2 | 1064.2 | 1031.5 | 1282.6 | 0.757408132 | 1220.225 | 1175.875 | 44.35       | 1.037716594 | 0.7939   | 1.031  |
| 97885_at   | 3478.4 | 3710.4 | 3103.7 | 2650.7 | 3867.6 | 3905.2 | 3529.6 | 3402.8 | 0.159781498 | 3235.8   | 3676.3   | 440.5       | 0.88017844  | 0.15     | 1.143  |
| 97886_at   | 260.6  | 208.7  | 328.5  | 292.8  | 219.1  | 239.8  | 284.8  | 288.4  | 0.652106743 | 272.65   | 258.025  | 14.625      | 1.056680554 | 0.6973   | -1.049 |
| 97887_at   | 128.1  | 130.9  | 148.9  | 62.2   | 104.6  | 161.7  | 74.4   | 72     | 0.629519048 | 117.525  | 103.175  | 14.35       | 1.13908408  | 0.638    | -1.145 |
| 97888_at   | 886.6  | 842.7  | 1075.3 | 929.8  | 1213.4 | 1139.9 | 1315.6 | 1381.5 | 0.004270911 | 933.6    | 1262.6   | 329         | 0.73942658  | 0.004171 | 1.354  |
| 97889_at   | 8.7    | 6.9    | 108.7  | 2.4    | 100    | 96     | 4.3    | 6.3    | 0.609891689 | 31.675   | 51.65    | 19.975      | 0.613262343 | 0.5745   | 2.005  |
| 97890_at   | 274.6  | 319.2  | 399.4  | 496.6  | 390.8  | 358.9  | 496.4  | 458.3  | 0.396123491 | 372.45   | 426.1    | 53.65       | 0.874090589 | 0.3481   | 1.164  |
| 97891_at   | 555.6  | 544.9  | 570.2  | 509.5  | 537.1  | 495.6  | 501.4  | 539.6  | 0.176553414 | 545.05   | 518.425  | 26.625      | 1.051357477 | 0.1784   | -1.051 |
| 97892_at   | 284.3  | 275.3  | 345.4  | 434.9  | 326.5  | 294.6  | 469.4  | 442.8  | 0.425502235 | 334.975  | 383.325  | 48.35       | 0.873866823 | 0.4251   | 1.142  |
| 97893_at   | 246.7  | 216.9  | 293.7  | 265.5  | 266.7  | 262.2  | 274.8  | 262.8  | 0.550287702 | 255.7    | 266.625  | 10.925      | 0.959024848 | 0.489    | 1.049  |
| 97894_at   | 357.6  | 451.9  | 807    | 866.7  | 464.9  | 492.8  | 508.2  | 579.6  | 0.455092123 | 620.8    | 511.375  | 109.425     | 1.213981912 | 0.5828   | -1.138 |
| 97895_f_at | 2457.9 | 2064.3 | 2201.2 | 2013.9 | 2984.3 | 2434.9 | 1670.7 | 1929.9 | 0.830145838 | 2184.325 | 2254.95  | 70.625      | 0.968680015 | 0.9425   | 1.01   |
| 97896_r_at | 657.8  | 743.5  | 929.2  | 921.6  | 1089.7 | 909.9  | 841.3  | 903.6  | 0.204205426 | 813.025  | 936.125  | 123.1       | 0.868500467 | 0.1963   | 1.158  |
| 97897_at   | 626.2  | 839.3  | 882    | 952.8  | 855.9  | 764.3  | 951.9  | 904.2  | 0.611039267 | 825.075  | 869.075  | 44          | 0.949371458 | 0.5776   | 1.063  |
| 97900_at   | 671.7  | 646.5  | 614    | 534.2  | 779.4  | 659.9  | 629.7  | 551.5  | 0.52142215  | 616.6    | 655.125  | 38.525      | 0.941194429 | 0.5404   | 1.058  |
| 97901_at   | 1378.1 | 1576.5 | 1596.3 | 1551   | 1448.8 | 1503.3 | 1215.5 | 1402   | 0.14978956  | 1525.475 | 1392.4   | 133.075     | 1.095572393 | 0.1577   | -1.097 |
| 97903_at   | 1517.5 | 1494.9 | 1251   | 1326.7 | 1175.2 | 1451   | 1333.6 | 1223.1 | 0.297893656 | 1397.525 | 1295.725 | 101.8       | 1.078566054 | 0.2968   | -1.079 |
| 97904_at   | 3617.1 | 3553.3 | 4025.1 | 4038.8 | 3464.7 | 3499.6 | 3970.3 | 4038   | 0.754227982 | 3808.575 | 3743.15  | 65.425      | 1.017478594 | 0.7448   | -1.018 |
| 97906_at   | 116.5  | 171.4  | 236.5  | 253    | 206.7  | 248.5  | 175.7  | 214.7  | 0.647650068 | 194.35   | 211.4    | 17.05       | 0.919347209 | 0.5507   | 1.128  |
| 97907_at   | 3812.8 | 4808.7 | 3305.1 | 3431.3 | 4788.7 | 3649.9 | 3408.1 | 3678.8 | 0.930346924 | 3839.475 | 3881.375 | 41.9        | 0.989204857 | 0.9112   | 1.013  |
| 97908_at   | 831.5  | 832.5  | 926.1  | 1092.3 | 955.6  | 771.3  | 1045.1 | 1061.2 | 0.691612107 | 920.6    | 958.3    | 37.7        | 0.960659501 | 0.7058   | 1.039  |
| 97909_at   | 6138.2 | 5464.5 | 5830.7 | 6561.6 | 5944.1 | 6050.8 | 6368.8 | 6517.1 | 0.448600546 | 5998.75  | 6220.2   | 221.45      | 0.964398251 | 0.427    | 1.039  |
| 97910_at   | 7.9    | 6.7    | 5.5    | 5.2    | 5.2    | 7.7    | 6      | 4.3    | 0.600911938 | 6.325    | 5.8      | 0.525       | 1.090517241 | 0.5805   | -1.095 |
| 97911_at   | 1544.4 | 1554.5 | 1230.9 | 1099.2 | 1560.2 | 1427.9 | 1116.7 | 1235.3 | 0.887867185 | 1357.25  | 1335.025 | 22.225      | 1.016647628 | 0.9068   | 1.014  |
| 97912_at   | 49.4   | 43.8   | 44.9   | 42.1   | 31.1   | 52.9   | 57     | 46     | 0.789676719 | 45.05    | 46.75    | 1.7         | 0.963636364 | 0.9242   | 1.014  |
| 97914_at   | 2213.9 | 2141.6 | 2345.5 | 2565.5 | 2809.2 | 2265.7 | 2828.3 | 2734   | 0.084370537 | 2316.625 | 2659.3   | 342.675     | 0.871140902 | 0.08373  | 1.146  |
| 97915_at   | 659.5  | 419.7  | 600.8  | 515.9  | 559.2  | 529.6  | 500.1  | 374.1  | 0.414899889 | 548.975  | 490.75   | 58.225      | 1.118644931 | 0.4438   | -1.115 |
| 97916_at   | 1634.1 | 1882.1 | 1743.3 | 1666.5 | 1982   | 1610.7 | 1673.6 | 1505.5 | 0.7548676   | 1731.5   | 1692.95  | 38.55       | 1.022770903 | 0.7057   | -1.027 |
| 97917_at   | 1558.3 | 1968.9 | 1203.2 | 1179.9 | 1572   | 1467.5 | 1148.4 | 1245.6 | 0.596139942 | 1477.575 | 1358.375 | 119.2       | 1.087751909 | 0.6401   | -1.072 |
| 97918_at   | 324.3  | 423.8  | 387.4  | 564.2  | 428.6  | 444.2  | 541.4  | 484.5  | 0.42540112  | 424.925  | 474.675  | 49.75       | 0.895191447 | 0.3546   | 1.136  |
| 97919_at   | 416.1  | 365    | 440.3  | 555.7  | 431.3  | 364.8  | 588.9  | 556.4  | 0.559773374 | 444.275  | 485.35   | 41.075      | 0.915370351 | 0.5858   | 1.085  |
| 97920_at   | 150    | 211.3  | 249.3  | 216.4  | 207.5  | 282.4  | 196.9  | 265.5  | 0.330211534 | 206.75   | 238.075  | 31.325      | 0.868423816 | 0.3377   | 1.157  |
| 97921_at   | 382.4  | 405.5  | 533.3  | 663.4  | 440.5  | 493.4  | 527.8  | 745.3  | 0.572785611 | 496.15   | 551.75   | 55.6        | 0.899229724 | 0.5401   | 1.117  |
| 97922_at   | 767.5  | 915.7  | 852.9  | 953    | 934.5  | 903.3  | 947.5  | 997.1  | 0.173474072 | 872.275  | 945.6    | 73.325      | 0.922456641 | 0.158    | 1.087  |
| 97923_at   | 1151   | 1169.5 | 811.6  | 1023.8 | 943.9  | 1116.3 | 1145.5 | 1142.3 | 0.636949009 | 1038.975 | 1087     | 48.025      | 0.955818767 | 0.6063   | 1.054  |
| 97924_at   | 859.6  | 758    | 645.7  | 598.4  | 764.7  | 808.3  | 750    | 682.9  | 0.602769767 | 715.425  | 751.475  | 36.05       | 0.952027679 | 0.5407   | 1.059  |



|            |        |        |        |        |        |        |        |        |             |          |          |         |             |          |        |
|------------|--------|--------|--------|--------|--------|--------|--------|--------|-------------|----------|----------|---------|-------------|----------|--------|
| 97925_at   | 574.4  | 627    | 523.8  | 742.5  | 627.3  | 416.5  | 412.5  | 508    | 0.117723811 | 616.925  | 491.075  | 125.85  | 1.2562745   | 0.1065   | -1.265 |
| 97926_s_at | 29.2   | 3.9    | 4.5    | 18.6   | 30     | 13.7   | 23.4   | 26.5   | 0.242845661 | 14.05    | 23.4     | 9.35    | 0.60042735  | 0.1741   | 2.275  |
| 97927_at   | 778.3  | 629.7  | 732.5  | 636.9  | 549.8  | 717.5  | 582.3  | 654.2  | 0.239107612 | 694.35   | 625.95   | 68.4    | 1.109273904 | 0.2338   | -1.111 |
| 97928_at   | 272.6  | 304.1  | 320.2  | 373.9  | 201.3  | 265.8  | 290.9  | 353.3  | 0.338873967 | 317.7    | 277.825  | 39.875  | 1.143525601 | 0.3135   | -1.159 |
| 97929_r_at | 566.7  | 632.6  | 436.6  | 489.1  | 587.6  | 521.5  | 441.6  | 585.8  | 0.960204455 | 531.25   | 534.125  | 2.875   | 0.994617365 | 0.9369   | 1.009  |
| 97930_f_at | 1976.2 | 2325.3 | 2093.6 | 1903.4 | 2240.2 | 2465.9 | 1901.3 | 2155.7 | 0.465958401 | 2074.625 | 2190.775 | 116.15  | 0.946982232 | 0.4729   | 1.054  |
| 97931_i_at | 6.3    | 4.6    | 2.4    | 3.1    | 30.2   | 2.7    | 1.9    | 2.1    | 0.518248932 | 4.1      | 9.225    | 5.125   | 0.444444444 | 0.89     | 1.105  |
| 97932_f_at | 2251.1 | 2186.1 | 1735.4 | 1904   | 2033   | 2568.9 | 1585.4 | 2084   | 0.84398384  | 2019.15  | 2067.825 | 48.675  | 0.976460774 | 0.9025   | 1.015  |
| 97933_at   | 1034.5 | 780.8  | 460.5  | 670.3  | 503.1  | 1057.5 | 676.3  | 521.1  | 0.797872594 | 736.525  | 689.5    | 47.025  | 1.068201595 | 0.7769   | -1.074 |
| 97934_at   | 1601.9 | 1435.3 | 1522.2 | 1284.2 | 1564   | 1556.5 | 1613.2 | 1679   | 0.125467374 | 1460.9   | 1603.175 | 142.275 | 0.91125423  | 0.1072   | 1.101  |
| 97935_at   | 502.4  | 503.7  | 693.7  | 746.9  | 509    | 576.6  | 664.4  | 710.8  | 0.965562236 | 611.675  | 615.2    | 3.525   | 0.994270156 | 0.9175   | 1.014  |
| 97936_at   | 103.8  | 167.9  | 213.4  | 236    | 147.7  | 134.7  | 177.6  | 186.8  | 0.588448086 | 180.275  | 161.7    | 18.575  | 1.114873222 | 0.7313   | -1.074 |
| 97937_at   | 148.5  | 173.5  | 142.7  | 159.8  | 158.6  | 200    | 153.4  | 171.3  | 0.28907325  | 156.125  | 170.825  | 14.7    | 0.913947022 | 0.2771   | 1.091  |
| 97939_at   | 1481.8 | 1560.2 | 1608.5 | 1466.7 | 1839.3 | 1689.3 | 1932.9 | 1760.9 | 0.006402701 | 1529.3   | 1805.6   | 276.3   | 0.846976074 | 0.003796 | 1.18   |
| 97940_at   | 45.6   | 22.4   | 28.6   | 23.6   | 29.7   | 21     | 39.1   | 10     | 0.557097382 | 30.05    | 24.95    | 5.1     | 1.204408818 | 0.4674   | -1.298 |
| 97941_at   | 209    | 203.9  | 258.4  | 256.9  | 64.5   | 159.8  | 203.1  | 173.9  | 0.065497611 | 232.05   | 150.325  | 81.725  | 1.543655413 | 0.1027   | -1.669 |
| 97942_g_at | 1967.5 | 1839.5 | 1427.9 | 2051.7 | 696    | 976.9  | 1376.8 | 1178.6 | 0.008909787 | 1821.65  | 1057.075 | 764.575 | 1.723293049 | 0.01502  | -1.761 |
| 97943_at   | 1391.8 | 1143.7 | 1230.2 | 1344.1 | 708.2  | 922.3  | 937.9  | 900.2  | 0.001849591 | 1277.45  | 867.15   | 410.3   | 1.4731592   | 0.002667 | -1.478 |
| 97944_f_at | 713.3  | 561.9  | 676    | 579.5  | 439.6  | 699.6  | 457.1  | 463.3  | 0.163583863 | 632.675  | 514.9    | 117.775 | 1.228733735 | 0.1254   | -1.246 |
| 97945_at   | 148    | 95.5   | 234.3  | 225.8  | 82.3   | 118.8  | 167.2  | 139.7  | 0.254803114 | 175.9    | 127      | 48.9    | 1.38503937  | 0.2963   | -1.345 |
| 97946_at   | 18.7   | 27.3   | 5.3    | 14.2   | 15     | 22.8   | 10     | 22.6   | 0.833380962 | 16.375   | 17.6     | 1.225   | 0.930397727 | 0.6795   | 1.19   |
| 97947_at   | 497.1  | 505.1  | 660.4  | 833.8  | 649    | 530.8  | 771    | 780.1  | 0.576272596 | 624.1    | 682.725  | 58.625  | 0.914130873 | 0.5321   | 1.106  |
| 97948_at   | 72     | 60.3   | 112.7  | 152.3  | 95     | 114.8  | 95.5   | 105.9  | 0.88072308  | 99.325   | 102.8    | 3.475   | 0.966196498 | 0.6648   | 1.103  |
| 97949_at   | 284.7  | 318.5  | 374.8  | 412.2  | 273.6  | 295.7  | 391.6  | 265    | 0.351861834 | 347.55   | 306.475  | 41.075  | 1.134023982 | 0.3321   | -1.137 |
| 97950_at   | 20.4   | 9.9    | 55.8   | 44.3   | 31.2   | 44.7   | 71.1   | 56.5   | 0.228421332 | 32.6     | 50.875   | 18.275  | 0.640786241 | 0.2103   | 1.83   |
| 97951_s_at | 717.6  | 568.6  | 607.8  | 873.5  | 545.5  | 735    | 624.8  | 664.9  | 0.560296832 | 691.875  | 642.55   | 49.325  | 1.076764454 | 0.5863   | -1.068 |
| 97952_at   | 16.2   | 15.5   | 11.6   | 11.4   | 10.9   | 21.8   | 14.2   | 14.5   | 0.553306952 | 13.675   | 15.35    | 1.675   | 0.890879479 | 0.582    | 1.104  |
| 97953_g_at | 333    | 322.2  | 410.2  | 543.7  | 310    | 283.3  | 419.9  | 471.9  | 0.664138241 | 402.275  | 371.275  | 31      | 1.083496061 | 0.6577   | -1.083 |
| 97954_at   | 9.2    | 29     | 15.3   | 14.3   | 17.4   | 20.7   | 3.6    | 26     | 0.997005245 | 16.95    | 16.925   | 0.025   | 1.001477105 | 0.7975   | -1.146 |
| 97955_at   | 29.7   | 26.6   | 18.4   | 29.9   | 15.2   | 33.5   | 30.8   | 24.6   | 0.980484418 | 26.15    | 26.025   | 0.125   | 1.004803074 | 0.894    | 1.03   |
| 97956_g_at | 28.5   | 17.1   | 12.9   | 22.9   | 17.9   | 15.1   | 15.4   | 24.4   | 0.616269842 | 20.35    | 18.2     | 2.15    | 1.118131868 | 0.6794   | -1.093 |
| 97957_at   | 115.1  | 154.8  | 182.4  | 160.4  | 123.7  | 129.1  | 130.3  | 171.8  | 0.451689929 | 153.175  | 138.725  | 14.45   | 1.104162912 | 0.4711   | -1.099 |
| 97958_at   | 75.2   | 66.3   | 82.1   | 130.1  | 90.5   | 70.5   | 102.8  | 119.8  | 0.687877569 | 88.425   | 95.9     | 7.475   | 0.922054223 | 0.6177   | 1.102  |
| 97960_at   | 689.8  | 580.5  | 967.7  | 714.8  | 372.6  | 500.8  | 831.9  | 692.1  | 0.329892247 | 738.2    | 599.35   | 138.85  | 1.23166764  | 0.296    | -1.267 |
| 97962_at   | 215.6  | 148.2  | 301.8  | 292.8  | 141.6  | 187.1  | 228.6  | 203.4  | 0.282691961 | 239.6    | 190.175  | 49.425  | 1.259892205 | 0.3275   | -1.23  |
| 97963_at   | 255.5  | 255.3  | 315.1  | 345.6  | 247    | 226.3  | 221    | 322.7  | 0.280185908 | 292.875  | 254.25   | 38.625  | 1.151917404 | 0.2581   | -1.155 |
| 97964_at   | 580    | 795.7  | 417.5  | 288.8  | 617.9  | 569.9  | 490    | 415.4  | 0.982232187 | 520.5    | 523.3    | 2.8     | 0.994649341 | 0.7963   | 1.065  |
| 97965_at   | 296.5  | 245.7  | 261.9  | 414.4  | 262    | 70.5   | 213.5  | 348.5  | 0.294990417 | 304.625  | 223.625  | 81      | 1.362213527 | 0.2802   | -1.548 |
| 97966_at   | 327.7  | 336.4  | 325.9  | 364    | 275.2  | 336.3  | 311.4  | 350.7  | 0.336477656 | 338.5    | 318.4    | 20.1    | 1.063128141 | 0.3179   | -1.066 |
| 97967_at   | 370.8  | 318.7  | 393.8  | 455.5  | 341.7  | 367.2  | 403.6  | 511.9  | 0.66602064  | 384.7    | 406.1    | 21.4    | 0.94730362  | 0.677    | 1.052  |
| 97969_at   | 60.4   | 73     | 76.5   | 76.4   | 150.8  | 126.6  | 120.5  | 114    | 0.002493118 | 71.575   | 127.975  | 56.4    | 0.559288924 | 0.000418 | 1.786  |
| 97970_at   | 106.3  | 42.2   | 105    | 103.8  | 101.5  | 167.8  | 64.4   | 71.9   | 0.686630605 | 89.325   | 101.4    | 12.075  | 0.88091716  | 0.7155   | 1.127  |
| 97971_at   | 399.5  | 486.1  | 435.8  | 403.5  | 529.3  | 566.4  | 351    | 397.3  | 0.619850875 | 431.225  | 461      | 29.775  | 0.935412148 | 0.695    | 1.052  |
| 97972_at   | 438.3  | 417.8  | 592.5  | 574.9  | 504    | 323.2  | 429.3  | 465.4  | 0.254265727 | 505.875  | 430.475  | 75.4    | 1.175155352 | 0.2653   | -1.177 |
| 97973_at   | 14.2   | 6      | 6.9    | 24.1   | 5.8    | 10.9   | 8.1    | 12.9   | 0.494224863 | 12.8     | 9.425    | 3.375   | 1.358090186 | 0.6298   | -1.206 |
| 97974_at   | 772.3  | 869    | 1236.4 | 1197.8 | 565.8  | 514.8  | 608.6  | 544.8  | 0.027052455 | 1018.875 | 558.5    | 460.375 | 1.824306177 | 0.003084 | -1.791 |
| 97975_at   | 566    | 479.6  | 410.7  | 783.6  | 345.4  | 421.8  | 667.4  | 700.1  | 0.833615409 | 559.975  | 533.675  | 26.3    | 1.049280929 | 0.7879   | -1.064 |
| 97976_at   | 170.7  | 154.5  | 183.7  | 231.3  | 190.3  | 188.8  | 176.9  | 239.5  | 0.546123473 | 185.05   | 198.875  | 13.825  | 0.930483972 | 0.5066   | 1.08   |
| 97977_at   | 201.7  | 131.9  | 138.5  | 185.6  | 100.4  | 259.5  | 155.8  | 182.9  | 0.796120911 | 164.425  | 174.65   | 10.225  | 0.941454337 | 0.9293   | 1.021  |
| 97979_at   | 716    | 582.1  | 640.8  | 574.8  | 649.5  | 594    | 677.9  | 744    | 0.433741957 | 628.425  | 666.35   | 37.925  | 0.943085466 | 0.425    | 1.061  |
| 97980_at   | 421.4  | 388.4  | 401.4  | 402    | 376.2  | 349.4  | 349.2  | 408.7  | 0.10205533  | 403.3    | 370.875  | 32.425  | 1.087428379 | 0.08189  | -1.089 |
| 97982_at   | 426.4  | 532.5  | 500.1  | 483.4  | 355.7  | 299.9  | 281.5  | 347.2  | 0.001387097 | 485.6    | 321.075  | 164.525 | 1.512419217 | 0.001312 | -1.515 |
| 97983_s_at | 250.9  | 228.2  | 515    | 576    | 314.1  | 346.2  | 393.7  | 439.9  | 0.849581276 | 392.525  | 373.475  | 19.05   | 1.05100743  | 0.9211   | 1.026  |
| 97984_i_at | 829.6  | 780.7  | 804.5  | 853.2  | 719.7  | 787.4  | 932.2  | 944.3  | 0.644322403 | 817      | 845.9    | 28.9    | 0.965835205 | 0.691    | 1.029  |
| 97985_f_at | 1641.7 | 1374.6 | 1651.8 | 1601   | 1406.2 | 1701.4 | 1619.3 | 1583.9 | 0.911674676 | 1567.275 | 1577.7   | 10.425  | 0.99339228  | 0.9112   | 1.007  |
| 97986_at   | 413.4  | 370.4  | 316.7  | 297.4  | 270.5  | 381.5  | 388.1  | 285.1  | 0.671341631 | 349.475  | 331.3    | 18.175  | 1.054859644 | 0.6457   | -1.06  |



|            |        |        |        |        |        |        |        |        |             |          |          |         |             |          |        |
|------------|--------|--------|--------|--------|--------|--------|--------|--------|-------------|----------|----------|---------|-------------|----------|--------|
| 97987_at   | 27.9   | 23.6   | 21.6   | 24.9   | 18.4   | 29.2   | 25     | 22.9   | 0.820251765 | 24.5     | 23.875   | 0.625   | 1.02617801  | 0.7627   | -1.035 |
| 97988_at   | 61.2   | 43     | 53.1   | 40.3   | 57.4   | 82.7   | 58.7   | 63.8   | 0.077110272 | 49.4     | 65.65    | 16.25   | 0.752475248 | 0.06493  | 1.333  |
| 97989_at   | 147.5  | 112.5  | 184.5  | 232.8  | 140.5  | 104.3  | 186.8  | 240.8  | 0.976096859 | 169.325  | 168.1    | 1.225   | 1.007287329 | 0.9371   | 1.02   |
| 97990_at   | 1636.4 | 1358.9 | 1561.8 | 1360.4 | 956.9  | 1131.7 | 1368.1 | 1229.3 | 0.034358821 | 1479.375 | 1171.5   | 307.875 | 1.262804097 | 0.03698  | -1.269 |
| 97991_at   | 271.9  | 240    | 427.9  | 499.3  | 351.2  | 370.9  | 594    | 358.3  | 0.516471483 | 359.775  | 418.6    | 58.825  | 0.85947205  | 0.4571   | 1.187  |
| 97992_at   | 160.9  | 157.8  | 145.2  | 157.1  | 140.2  | 152.2  | 152.2  | 156.3  | 0.344631865 | 155.25   | 150.225  | 5.025   | 1.033449825 | 0.3505   | -1.034 |
| 97993_at   | 400.2  | 279.9  | 349.6  | 337.3  | 318.9  | 386.8  | 333.8  | 340.5  | 0.914409474 | 341.75   | 345      | 3.25    | 0.99057971  | 0.8657   | 1.015  |
| 97994_at   | 918.2  | 865.6  | 1184   | 1284.9 | 901.4  | 786.1  | 618.2  | 927.1  | 0.090438551 | 1063.175 | 808.2    | 254.975 | 1.315485028 | 0.08667  | -1.314 |
| 97995_at   | 249.6  | 288.4  | 366.7  | 454.4  | 235.1  | 260.7  | 244.5  | 266.3  | 0.146076903 | 339.775  | 251.65   | 88.125  | 1.350188754 | 0.08811  | -1.317 |
| 97996_at   | 50.2   | 50.2   | 54.6   | 91.6   | 43.9   | 62     | 55.8   | 72.9   | 0.808345008 | 61.65    | 58.65    | 3       | 1.051150895 | 0.8643   | -1.033 |
| 97997_at   | 795.4  | 1093.4 | 1117.7 | 1237   | 956.9  | 1081.5 | 1122.8 | 1367.8 | 0.595661841 | 1060.875 | 1132.25  | 71.375  | 0.936961802 | 0.585    | 1.072  |
| 97998_at   | 172.7  | 163.5  | 294.4  | 223    | 193.9  | 351.6  | 157.3  | 169.2  | 0.935566478 | 213.4    | 218      | 4.6     | 0.978899083 | 0.9818   | 1.005  |
| 98000_at   | 35.7   | 35.1   | 67.7   | 54.7   | 56.4   | 102.7  | 67     | 72.7   | 0.08502359  | 48.3     | 74.7     | 26.4    | 0.646586345 | 0.0706   | 1.571  |
| 98001_at   | 134.6  | 157    | 226.2  | 227.5  | 119.4  | 176.5  | 174.2  | 201.8  | 0.558748432 | 186.325  | 167.975  | 18.35   | 1.109242447 | 0.6007   | -1.101 |
| 98002_at   | 140.6  | 114.4  | 143    | 178.6  | 147.1  | 155.4  | 147.8  | 162    | 0.554349082 | 144.15   | 153.075  | 8.925   | 0.941695247 | 0.4739   | 1.074  |
| 98003_at   | 129.5  | 121    | 112.3  | 103.1  | 107.5  | 135.1  | 117.8  | 114.8  | 0.785001074 | 116.475  | 118.8    | 2.325   | 0.980429293 | 0.7813   | 1.02   |
| 98004_at   | 157.2  | 159.4  | 107.2  | 131.5  | 96.8   | 163    | 165.3  | 148.3  | 0.830270964 | 138.825  | 143.35   | 4.525   | 0.968433903 | 0.8895   | 1.023  |
| 98005_at   | 474.3  | 429.5  | 422.1  | 426.3  | 517.5  | 338.4  | 748.9  | 465.5  | 0.424048195 | 438.05   | 517.575  | 79.525  | 0.84635077  | 0.4715   | 1.136  |
| 98006_at   | 1006   | 943.6  | 787.8  | 842.2  | 876.6  | 912.3  | 870.2  | 626.1  | 0.406930615 | 894.9    | 821.3    | 73.6    | 1.089614027 | 0.407    | -1.096 |
| 98007_at   | 455.1  | 397.8  | 554.9  | 649.9  | 267.1  | 233.5  | 240.7  | 336.1  | 0.015097753 | 514.425  | 269.35   | 245.075 | 1.909875627 | 0.003308 | -1.897 |
| 98008_at   | 808.2  | 775.6  | 899.2  | 940.2  | 632.3  | 571.2  | 627.2  | 527.7  | 0.001933652 | 855.8    | 589.6    | 266.2   | 1.451492537 | 0.000966 | -1.451 |
| 98010_at   | 147.7  | 132.9  | 123.9  | 154.1  | 245.3  | 156.6  | 209.3  | 197    | 0.035182718 | 139.65   | 202.05   | 62.4    | 0.691165553 | 0.01414  | 1.434  |
| 98011_at   | 336.4  | 253.3  | 296.9  | 373.7  | 354    | 409.1  | 324.2  | 372.7  | 0.169210059 | 315.075  | 365      | 49.925  | 0.863219178 | 0.1631   | 1.166  |
| 98013_at   | 513.9  | 583.4  | 795.5  | 791.7  | 743.2  | 510.1  | 714.2  | 689.4  | 0.94110597  | 671.125  | 664.225  | 6.9     | 1.010388046 | 0.984    | 1.003  |
| 98014_at   | 9      | 6.8    | 5.7    | 8.1    | 3.4    | 9.5    | 9.4    | 6.4    | 0.895675458 | 7.4      | 7.175    | 0.225   | 1.031358885 | 0.7214   | -1.103 |
| 98015_at   | 649.6  | 723.8  | 898.8  | 805.9  | 770    | 876.6  | 1020.7 | 908.5  | 0.145617635 | 769.525  | 893.95   | 124.425 | 0.860814363 | 0.1448   | 1.164  |
| 98016_at   | 526.8  | 640.3  | 527.9  | 581.8  | 674.3  | 478.7  | 512.8  | 548.8  | 0.770335735 | 569.2    | 553.65   | 15.55   | 1.028086336 | 0.7196   | -1.033 |
| 98017_at   | 211.2  | 197.8  | 190.1  | 235.1  | 153.7  | 181    | 175    | 150.5  | 0.014339093 | 208.55   | 165.05   | 43.5    | 1.263556498 | 0.01163  | -1.264 |
| 98018_at   | 169.4  | 170.3  | 165    | 205.9  | 144.5  | 91.2   | 110.8  | 121.6  | 0.006340576 | 177.65   | 117.025  | 60.625  | 1.518051698 | 0.007671 | -1.533 |
| 98019_at   | 1397.4 | 1327.4 | 1160.4 | 1051.6 | 1006.2 | 1163.4 | 1281.4 | 1344   | 0.754248736 | 1234.2   | 1198.75  | 35.45   | 1.029572471 | 0.7603   | -1.029 |
| 98020_at   | 2192.8 | 1986.7 | 1879.4 | 1893.1 | 1812.1 | 1842.7 | 1959.7 | 1905.1 | 0.242175438 | 1988     | 1879.9   | 108.1   | 1.057503059 | 0.2179   | -1.056 |
| 98021_at   | 187.5  | 197.4  | 211.1  | 162.2  | 283.9  | 204.1  | 209.6  | 190.4  | 0.232479014 | 189.55   | 222      | 32.45   | 0.853828829 | 0.2008   | 1.162  |
| 98022_at   | 108.4  | 144.7  | 158.9  | 128.2  | 133.2  | 115.2  | 143.6  | 147.9  | 0.995638805 | 135.05   | 134.975  | 0.075   | 1.000555658 | 0.9622   | 1.005  |
| 98023_r_at | 5.7    | 3.6    | 1.3    | 0.8    | 2.9    | 11.6   | 7.6    | 1.3    | 0.307489458 | 2.85     | 5.85     | 3       | 0.487179487 | 0.3551   | 1.967  |
| 98024_at   | 611.8  | 600.4  | 839.7  | 927.4  | 642.4  | 654.6  | 938.3  | 750.4  | 0.988552442 | 744.825  | 746.425  | 1.6     | 0.997856449 | 0.9533   | 1.009  |
| 98025_at   | 39.9   | 54.5   | 35.1   | 30.6   | 48.5   | 60.6   | 29     | 38.4   | 0.649209736 | 40.025   | 44.125   | 4.1     | 0.907082153 | 0.6899   | 1.088  |
| 98026_g_at | 55.5   | 107.2  | 87.2   | 74.5   | 94.4   | 131.4  | 89.2   | 71.8   | 0.38406139  | 81.1     | 96.7     | 15.6    | 0.838676319 | 0.3723   | 1.197  |
| 98027_at   | 527.1  | 457.3  | 549.1  | 582.1  | 415.8  | 453.2  | 399.9  | 413.8  | 0.01902665  | 528.9    | 420.675  | 108.225 | 1.25726511  | 0.007935 | -1.254 |
| 98028_at   | 419.8  | 661.2  | 586.5  | 437.4  | 452    | 498.8  | 494.7  | 475.5  | 0.492560396 | 526.225  | 480.25   | 45.975  | 1.09573139  | 0.5393   | -1.076 |
| 98029_at   | 310.6  | 313    | 267    | 282.6  | 224    | 276.2  | 251.1  | 218.8  | 0.027247405 | 293.3    | 242.525  | 50.775  | 1.20935986  | 0.02726  | -1.212 |
| 98030_at   | 5.1    | 21.3   | 26.6   | 42     | 54.9   | 7.5    | 31.7   | 33.5   | 0.534231909 | 23.75    | 31.9     | 8.15    | 0.744514107 | 0.6249   | 1.381  |
| 98031_at   | 2592.5 | 2338.8 | 2058.4 | 2035.7 | 2239.6 | 2354.9 | 1369.5 | 1520.1 | 0.23501486  | 2256.35  | 1871.025 | 385.325 | 1.205943266 | 0.2056   | -1.233 |
| 98032_at   | 514.3  | 386.6  | 261.7  | 286    | 511.5  | 388.8  | 347.6  | 399.3  | 0.494186479 | 362.15   | 411.8    | 49.65   | 0.879431763 | 0.4086   | 1.167  |
| 98033_at   | 917.4  | 771.8  | 753    | 764.7  | 861.8  | 772.9  | 858.7  | 802.3  | 0.640013169 | 801.725  | 823.925  | 22.2    | 0.9730558   | 0.6002   | 1.03   |
| 98034_at   | 5.7    | 5.9    | 6      | 2.6    | 67.5   | 12     | 45     | 25.9   | 0.073295131 | 5.05     | 37.6     | 32.55   | 0.134308511 | 0.004558 | 6.501  |
| 98035_g_at | 125.9  | 108.8  | 152.9  | 129.9  | 185    | 232.4  | 183.1  | 142.2  | 0.047135009 | 129.375  | 185.675  | 56.3    | 0.696782012 | 0.02758  | 1.424  |
| 98036_at   | 506.3  | 439.8  | 601.4  | 524.2  | 450.1  | 559.5  | 472.4  | 546.9  | 0.811454677 | 517.925  | 507.225  | 10.7    | 1.021095175 | 0.8279   | 1.019  |
| 98037_at   | 1127.8 | 1381.2 | 1150.9 | 1196.4 | 1418.8 | 1307.4 | 1167.3 | 1245.5 | 0.401494534 | 1214.075 | 1284.75  | 70.675  | 0.944989298 | 0.3875   | 1.059  |
| 98038_at   | 9682.9 | 8611   | 8266.4 | 8974.1 | 7869.1 | 8143.8 | 8623.7 | 8663.8 | 0.179620984 | 8883.6   | 8325.1   | 558.5   | 1.067086281 | 0.1693   | -1.066 |
| 98039_at   | 1144.6 | 1383.2 | 808.8  | 767.3  | 1277.9 | 1093.3 | 836.6  | 861.7  | 0.963484621 | 1025.975 | 1017.375 | 8.6     | 1.008453127 | 0.9726   | 1.006  |
| 98040_at   | 280    | 268    | 262.8  | 253.2  | 249.1  | 331.6  | 233.8  | 296.2  | 0.643554303 | 266      | 277.675  | 11.675  | 0.957954443 | 0.6958   | 1.035  |
| 98041_at   | 18.6   | 1      | 5.1    | 3.3    | 1.9    | 2.2    | 0.9    | 3.6    | 0.308669369 | 7        | 2.15     | 4.85    | 3.255813953 | 0.2789   | -2.214 |
| 98042_at   | 734.1  | 612.3  | 869.7  | 734    | 786.4  | 725.3  | 860.1  | 801.3  | 0.39528161  | 737.525  | 793.275  | 55.75   | 0.929721723 | 0.362    | 1.082  |
| 98044_at   | 203    | 153    | 220.6  | 230.1  | 144.2  | 241.4  | 286.8  | 223.3  | 0.546759016 | 201.675  | 223.925  | 22.25   | 0.900636374 | 0.6346   | 1.09   |
| 98045_s_at | 387    | 551    | 641.8  | 961.3  | 539.2  | 458.8  | 832.3  | 919.1  | 0.762103594 | 635.275  | 687.35   | 52.075  | 0.924238016 | 0.7308   | 1.095  |
| 98047_at   | 1453.4 | 1194.5 | 1142.4 | 1008.7 | 1167.5 | 1198.6 | 1099.9 | 1076.7 | 0.55083439  | 1199.75  | 1135.675 | 64.075  | 1.056420191 | 0.5769   | -1.048 |



|            |         |         |         |         |         |         |         |         |             |          |          |         |             |         |        |
|------------|---------|---------|---------|---------|---------|---------|---------|---------|-------------|----------|----------|---------|-------------|---------|--------|
| 98048_at   | 672.4   | 478.2   | 870.6   | 950.1   | 653.5   | 641.3   | 960     | 803.2   | 0.873240746 | 742.825  | 764.5    | 21.675  | 0.971648136 | 0.7972  | 1.05   |
| 98049_at   | 620.4   | 542     | 583.4   | 604.6   | 629.2   | 489.9   | 590.2   | 641.3   | 0.999016369 | 587.6    | 587.65   | 0.05    | 0.999914915 | 0.9537  | 1.004  |
| 98051_at   | 480.4   | 430.8   | 455.6   | 424.5   | 476.7   | 478.6   | 525.3   | 469.1   | 0.070941769 | 447.825  | 487.425  | 39.6    | 0.918756732 | 0.06773 | 1.089  |
| 98052_at   | 459     | 340.1   | 373.5   | 335.8   | 417.9   | 534.7   | 358.6   | 421.4   | 0.276810168 | 377.1    | 433.15   | 56.05   | 0.8705991   | 0.2604  | 1.146  |
| 98053_at   | 667.1   | 754.5   | 729.5   | 623     | 626.4   | 730.8   | 607.4   | 618.9   | 0.292723271 | 693.525  | 645.875  | 47.65   | 1.073775885 | 0.2858  | -1.074 |
| 98054_at   | 37.8    | 31.4    | 19.5    | 4.8     | 22.7    | 45.7    | 22.9    | 32.5    | 0.437671792 | 23.375   | 30.95    | 7.575   | 0.755250404 | 0.3654  | 1.62   |
| 98055_at   | 379.6   | 298.8   | 491.5   | 321.9   | 400.8   | 389     | 374.3   | 462.6   | 0.512780308 | 372.95   | 406.675  | 33.725  | 0.917071371 | 0.4263  | 1.107  |
| 98056_at   | 625.3   | 670.1   | 762.4   | 653.1   | 702.2   | 619     | 634.5   | 707.2   | 0.759959868 | 677.725  | 665.725  | 12      | 1.018025461 | 0.7683  | -1.017 |
| 98057_at   | 336.4   | 434.4   | 505.5   | 492.2   | 393.2   | 353.7   | 451.5   | 522.9   | 0.831998035 | 442.125  | 430.325  | 11.8    | 1.027421135 | 0.8458  | 1.026  |
| 98059_s_at | 2181.6  | 2650.7  | 3272    | 2770.8  | 2273.7  | 2083.9  | 2785    | 2657.1  | 0.372913621 | 2718.775 | 2449.925 | 268.85  | 1.109738053 | 0.3845  | -1.106 |
| 98060_at   | 281.5   | 349.4   | 359.7   | 323     | 313.1   | 320.5   | 308.9   | 321.1   | 0.528152702 | 328.4    | 315.9    | 12.5    | 1.039569484 | 0.557   | -1.035 |
| 98061_at   | 1329.2  | 1322    | 1088.3  | 874.3   | 1039.7  | 1240.3  | 891.9   | 896.4   | 0.357544752 | 1153.45  | 1017.075 | 136.375 | 1.13408549  | 0.3746  | -1.129 |
| 98063_at   | 26.7    | 12.4    | 12.1    | 12.4    | 12.9    | 27.6    | 30.9    | 14      | 0.389836319 | 15.9     | 21.35    | 5.45    | 0.744730679 | 0.3809  | 1.325  |
| 98064_at   | 2863.1  | 2458.2  | 2801.9  | 2239    | 2411.9  | 2548.6  | 2228.2  | 2219.9  | 0.217895125 | 2590.55  | 2352.15  | 238.4   | 1.10135408  | 0.2115  | -1.098 |
| 98065_at   | 1288.4  | 1530    | 1964.8  | 2147.2  | 1937.2  | 1636.3  | 1880.9  | 1983    | 0.581667196 | 1732.6   | 1859.35  | 126.75  | 0.931831016 | 0.5061  | 1.092  |
| 98066_r_at | 291.8   | 287.2   | 276.6   | 370.6   | 292.7   | 250.5   | 279.6   | 250.2   | 0.180701454 | 306.55   | 268.25   | 38.3    | 1.14277726  | 0.1467  | -1.138 |
| 98067_at   | 84.6    | 143.2   | 135.7   | 124.9   | 96      | 77.9    | 60.2    | 42.6    | 0.023140077 | 122.1    | 69.175   | 52.925  | 1.765088544 | 0.03114 | -1.809 |
| 98069_s_at | 822.3   | 832     | 852.3   | 729.1   | 939.9   | 1123.7  | 762.1   | 714.7   | 0.482107938 | 808.925  | 885.1    | 76.175  | 0.913936278 | 0.5135  | 1.079  |
| 98070_at   | 933     | 855.7   | 811.4   | 709.4   | 953.1   | 755.7   | 645.3   | 707     | 0.477072829 | 827.375  | 765.275  | 62.1    | 1.0811473   | 0.4387  | -1.087 |
| 98071_f_at | 890.2   | 868.6   | 1049.2  | 993.8   | 881.2   | 940.6   | 1082    | 1035    | 0.602544759 | 950.45   | 984.7    | 34.25   | 0.965217833 | 0.605   | 1.036  |
| 98072_r_at | 30.7    | 47.2    | 41      | 70.3    | 45.4    | 42.7    | 56.9    | 69.7    | 0.564673125 | 47.3     | 53.675   | 6.375   | 0.881229623 | 0.4859  | 1.165  |
| 98073_at   | 799.1   | 773.8   | 812.5   | 867.2   | 645.9   | 763.4   | 648.7   | 795.5   | 0.076454022 | 813.15   | 713.375  | 99.775  | 1.139863326 | 0.06386 | -1.144 |
| 98075_at   | 1454.7  | 1314.1  | 1115.9  | 1149.8  | 1246.7  | 1328.6  | 1241.1  | 1269.3  | 0.883252357 | 1258.625 | 1271.425 | 12.8    | 0.989932556 | 0.8154  | 1.016  |
| 98076_at   | 2380.3  | 2194.8  | 1943.8  | 1587    | 2271.8  | 2289.1  | 2068.1  | 1961.7  | 0.554910397 | 2026.475 | 2147.675 | 121.2   | 0.94356688  | 0.5084  | 1.07   |
| 98077_at   | 884.2   | 1112    | 1345.1  | 1379.6  | 585     | 860.8   | 1461.7  | 1343.4  | 0.640377897 | 1180.225 | 1062.725 | 117.5   | 1.110564822 | 0.5406  | -1.165 |
| 98078_at   | 257.8   | 259.7   | 232.5   | 231     | 201.5   | 297.4   | 211.5   | 280.7   | 0.926041715 | 245.25   | 247.775  | 2.525   | 0.989809303 | 0.9797  | -1.003 |
| 98079_at   | 145.9   | 177.2   | 119.2   | 93.1    | 125     | 165     | 82.8    | 88.2    | 0.504897916 | 133.85   | 115.25   | 18.6    | 1.161388286 | 0.4758  | -1.175 |
| 98081_at   | 706.8   | 673.5   | 627.1   | 565     | 624.4   | 539     | 577.3   | 625.9   | 0.221733448 | 643.1    | 591.65   | 51.45   | 1.086960196 | 0.2242  | -1.085 |
| 98082_at   | 8.8     | 4       | 9.4     | 9.7     | 6       | 43.1    | 6.3     | 10.1    | 0.419410793 | 7.975    | 16.375   | 8.4     | 0.487022901 | 0.4554  | 1.502  |
| 98083_at   | 893.6   | 730.8   | 942.8   | 973.3   | 874.7   | 670.6   | 1083.1  | 1021.4  | 0.807876033 | 885.125  | 912.45   | 27.325  | 0.970053154 | 0.8789  | 1.02   |
| 98084_at   | 4228.8  | 3500.9  | 4174.4  | 3671.8  | 3614.3  | 4642.6  | 3631.2  | 3934.8  | 0.844842106 | 3893.975 | 3955.725 | 61.75   | 0.984389714 | 0.8606  | 1.014  |
| 98085_f_at | 21735.9 | 24480.3 | 14203.8 | 16355.4 | 17253.5 | 17575.1 | 16878.7 | 18283.3 | 0.52731345  | 19193.85 | 17497.65 | 1696.2  | 1.096938732 | 0.6021  | -1.072 |
| 98086_r_at | 142     | 81.7    | 79.8    | 86.5    | 92.8    | 137.8   | 19.7    | 70      | 0.570941891 | 97.5     | 80.075   | 17.425  | 1.217608492 | 0.4252  | -1.459 |
| 98087_at   | 513.9   | 504.3   | 507     | 618.4   | 551     | 534.8   | 636     | 640     | 0.212009983 | 535.9    | 590.45   | 54.55   | 0.907612838 | 0.2025  | 1.102  |
| 98088_at   | 384.3   | 419.7   | 358.2   | 427.9   | 282.7   | 477.7   | 439.6   | 391.1   | 0.995864591 | 397.525  | 397.775  | 0.25    | 0.999371504 | 0.902   | 1.016  |
| 98089_at   | 232.3   | 222.7   | 243.9   | 198     | 271.5   | 248.5   | 235.9   | 208     | 0.350888516 | 224.225  | 240.975  | 16.75   | 0.930490715 | 0.3626  | 1.073  |
| 98090_at   | 259.8   | 186.7   | 193.5   | 208.3   | 203.4   | 185     | 182     | 171.6   | 0.211060249 | 212.075  | 185.5    | 26.575  | 1.143261456 | 0.1725  | -1.136 |
| 98092_at   | 1812.4  | 2600.4  | 1496.9  | 1720.4  | 3281.5  | 2714.3  | 1835.3  | 2227    | 0.177773807 | 1907.525 | 2514.525 | 607     | 0.758602519 | 0.1612  | 1.316  |
| 98094_f_at | 654.4   | 606.6   | 682.1   | 842.5   | 614.4   | 596.7   | 670.7   | 785.4   | 0.672491108 | 696.4    | 666.8    | 29.6    | 1.044391122 | 0.6723  | -1.042 |
| 98096_f_at | 278.2   | 238.2   | 306.8   | 287.7   | 300.7   | 224.9   | 319.8   | 332     | 0.579471079 | 277.725  | 294.35   | 16.625  | 0.94351962  | 0.6381  | 1.053  |
| 98097_r_at | 151.8   | 87.4    | 144.4   | 123.1   | 119.5   | 140.5   | 172.4   | 170.2   | 0.259298468 | 126.675  | 150.65   | 23.975  | 0.840856289 | 0.272   | 1.202  |
| 98098_at   | 12      | 14.7    | 7.4     | 11.7    | 7.4     | 14      | 16.7    | 14.6    | 0.520085203 | 11.45    | 13.175   | 1.725   | 0.869070209 | 0.6159  | 1.132  |
| 98099_at   | 835     | 1050.4  | 786     | 908.4   | 1178.7  | 704     | 847.8   | 936.4   | 0.857614816 | 894.95   | 916.725  | 21.775  | 0.976246966 | 0.9223  | 1.013  |
| 98101_at   | 1415.4  | 1652.2  | 1553.6  | 1361.8  | 1612.5  | 1324.1  | 1319.5  | 1360.8  | 0.378322867 | 1495.75  | 1404.225 | 91.525  | 1.065178301 | 0.3633  | -1.066 |
| 98102_at   | 1937.3  | 2185.6  | 2419.5  | 1719.6  | 2483.3  | 2435.9  | 2425.9  | 2165.8  | 0.131479293 | 2065.5   | 2377.725 | 312.225 | 0.868687506 | 0.1155  | 1.159  |
| 98104_at   | 2281.1  | 1983.4  | 1895    | 1702.7  | 1599.5  | 1645.2  | 1394.4  | 1479.5  | 0.027811326 | 1965.55  | 1529.65  | 435.9   | 1.284967149 | 0.01333 | -1.281 |
| 98106_at   | 686     | 669.4   | 584.7   | 578.2   | 671.5   | 678     | 561     | 598.7   | 0.956447508 | 629.575  | 627.3    | 2.275   | 1.003626654 | 0.9544  | 1.004  |
| 98107_at   | 880.9   | 850.2   | 1263.8  | 1199    | 679.9   | 812.7   | 1100.7  | 992.8   | 0.325812532 | 1048.475 | 896.525  | 151.95  | 1.169487744 | 0.3281  | -1.171 |
| 98108_at   | 198.8   | 199.4   | 187.6   | 185.5   | 220.1   | 234.4   | 167.1   | 219.2   | 0.32848726  | 192.825  | 210.2    | 17.375  | 0.917340628 | 0.3496  | 1.082  |
| 98109_at   | 134.7   | 190.2   | 105.4   | 150.4   | 133     | 137.6   | 155.6   | 179.6   | 0.773073615 | 145.175  | 151.45   | 6.275   | 0.958567184 | 0.696   | 1.059  |
| 98110_at   | 545.3   | 553.1   | 694.8   | 603     | 699.2   | 600.5   | 551.8   | 701.5   | 0.468621864 | 599.05   | 638.25   | 39.2    | 0.93858206  | 0.468   | 1.065  |
| 98111_at   | 670.8   | 554.6   | 1103.8  | 1113.2  | 791.3   | 686.1   | 1018.1  | 983.9   | 0.957682463 | 860.6    | 869.85   | 9.25    | 0.989365983 | 0.8352  | 1.044  |
| 98112_r_at | 27.1    | 45.5    | 68.4    | 103.6   | 58.1    | 79.7    | 56.2    | 67.7    | 0.818521689 | 61.15    | 65.425   | 4.275   | 0.934658005 | 0.576   | 1.192  |
| 98113_at   | 3076.8  | 4220.1  | 3726.9  | 3281.3  | 4783.8  | 3401.7  | 3499.5  | 4029.2  | 0.420300889 | 3576.275 | 3928.55  | 352.275 | 0.910329511 | 0.4141  | 1.096  |
| 98114_at   | 422.6   | 396.4   | 420.3   | 551.5   | 511.1   | 359.1   | 540.6   | 588     | 0.427643756 | 447.7    | 499.7    | 52      | 0.895937563 | 0.4677  | 1.107  |
| 98116_at   | 6.1     | 7.9     | 2.6     | 4       | 2.4     | 25.5    | 19.1    | 4.7     | 0.259640483 | 5.15     | 12.925   | 7.775   | 0.398452611 | 0.3708  | 1.815  |



|            |         |         |         |         |         |         |         |         |             |          |           |          |             |          |        |
|------------|---------|---------|---------|---------|---------|---------|---------|---------|-------------|----------|-----------|----------|-------------|----------|--------|
| 98117_at   | 97.7    | 81.4    | 69      | 115.8   | 86.4    | 112.4   | 114.3   | 131.6   | 0.193354627 | 90.975   | 111.175   | 20.2     | 0.818304475 | 0.1935   | 1.232  |
| 98118_at   | 8.6     | 6.8     | 4.9     | 7.9     | 4.4     | 23.6    | 6.2     | 20.5    | 0.269352017 | 7.05     | 13.675    | 6.625    | 0.515539305 | 0.3549   | 1.553  |
| 98119_at   | 18295.9 | 21169.6 | 14384.7 | 17317.6 | 16883.8 | 17359.9 | 17986.8 | 18432.8 | 0.935188751 | 17791.95 | 17665.825 | 126.125  | 1.007139491 | 0.9834   | 1.002  |
| 98120_at   | 1633.8  | 1975.1  | 1429.3  | 1179.3  | 1775.7  | 1608.4  | 1221.1  | 1272.9  | 0.707023596 | 1554.375 | 1469.525  | 84.85    | 1.057739746 | 0.7318   | -1.052 |
| 98121_at   | 1254.6  | 1400.1  | 1300.2  | 1332.6  | 1395.5  | 1386.1  | 1394.9  | 1477    | 0.054372035 | 1321.875 | 1413.375  | 91.5     | 0.935261343 | 0.04918  | 1.07   |
| 98122_at   | 1329.8  | 1366.5  | 1562.7  | 1338.6  | 1224.9  | 1111.5  | 1208.3  | 1264.1  | 0.028225411 | 1399.4   | 1202.2    | 197.2    | 1.164032607 | 0.01821  | -1.163 |
| 98123_at   | 24.8    | 17      | 5.6     | 3.3     | 16.8    | 18.4    | 21.5    | 15.3    | 0.372998498 | 12.675   | 18        | 5.325    | 0.704166667 | 0.2262   | 1.904  |
| 98124_at   | 990.2   | 962.7   | 781.9   | 639.3   | 1118.9  | 917.7   | 800.2   | 793.2   | 0.588803689 | 843.525  | 907.5     | 63.975   | 0.929504132 | 0.5688   | 1.081  |
| 98125_at   | 867     | 901.2   | 806.4   | 778     | 1071.1  | 1084.6  | 729.9   | 810.3   | 0.421427359 | 838.15   | 923.975   | 85.825   | 0.907113288 | 0.4531   | 1.088  |
| 98126_s_at | 95.2    | 71.3    | 88      | 119.7   | 16.6    | 35.7    | 50.9    | 38.2    | 0.004264073 | 93.55    | 35.35     | 58.2     | 2.646393211 | 0.007586 | -2.805 |
| 98127_at   | 1377.7  | 1765.5  | 1693.2  | 1557.5  | 1696.2  | 1475.8  | 1687.2  | 1623.3  | 0.83255329  | 1598.475 | 1620.625  | 22.15    | 0.986332433 | 0.8021   | 1.017  |
| 98128_at   | 3741.2  | 3957.2  | 3387.3  | 2924.9  | 3215.3  | 3575.4  | 3341.9  | 3053.5  | 0.454157257 | 3502.65  | 3296.525  | 206.125  | 1.062527965 | 0.4795   | -1.057 |
| 98129_at   | 8725.8  | 12116.1 | 7775.5  | 7959.4  | 10021.9 | 8066.9  | 9672.5  | 9144.3  | 0.943889611 | 9144.2   | 9226.4    | 82.2     | 0.991090783 | 0.8507   | 1.022  |
| 98130_at   | 1692.9  | 1463.7  | 1350.9  | 1180.3  | 1446.3  | 1752.3  | 1043.1  | 1314.7  | 0.863504829 | 1421.95  | 1389.1    | 32.85    | 1.023648405 | 0.8155   | -1.033 |
| 98131_at   | 525.2   | 518.3   | 468.5   | 383.2   | 494.1   | 448     | 466.2   | 402.9   | 0.604356334 | 473.8    | 452.8     | 21       | 1.046378092 | 0.6491   | -1.041 |
| 98132_at   | 572.4   | 730.5   | 683.7   | 739     | 477.5   | 431.1   | 336     | 451.8   | 0.002240413 | 681.4    | 424.1     | 257.3    | 1.606696534 | 0.002704 | -1.612 |
| 98133_at   | 7.3     | 9.4     | 10      | 8.9     | 11.6    | 9       | 17.9    | 23.8    | 0.136510477 | 8.9      | 15.575    | 6.675    | 0.571428571 | 0.0726   | 1.639  |
| 98134_at   | 452.6   | 436.6   | 572.8   | 484.9   | 462.3   | 398.4   | 555.1   | 432     | 0.604918105 | 486.725  | 461.95    | 24.775   | 1.053631345 | 0.5798   | -1.056 |
| 98135_r_at | 30.9    | 35.2    | 23.6    | 20.9    | 20.1    | 29.8    | 40.2    | 22.6    | 0.928325525 | 27.65    | 28.175    | 0.525    | 0.98136646  | 0.9835   | 1.004  |
| 98136_at   | 685.4   | 685.4   | 840     | 814.4   | 689.8   | 707.4   | 745.8   | 667.4   | 0.294603779 | 756.3    | 702.6     | 53.7     | 1.076430401 | 0.2841   | -1.072 |
| 98137_at   | 92      | 67.5    | 42.4    | 62.7    | 57.6    | 141.2   | 61.7    | 72.2    | 0.479005294 | 66.15    | 83.175    | 17.025   | 0.795311091 | 0.4764   | 1.218  |
| 98138_at   | 287.4   | 331.8   | 298.4   | 277.1   | 311.5   | 272.2   | 265.4   | 306.1   | 0.574837472 | 298.675  | 288.8     | 9.875    | 1.034193213 | 0.5694   | 1.034  |
| 98139_at   | 16.8    | 15.9    | 10.8    | 13.1    | 29.6    | 23.7    | 35.8    | 13.8    | 0.085576156 | 14.15    | 25.725    | 11.575   | 0.550048591 | 0.05179  | 1.742  |
| 98140_at   | 467.6   | 383.3   | 290.5   | 367.7   | 278.6   | 493.2   | 310.6   | 359     | 0.786587002 | 377.275  | 360.35    | 16.925   | 1.046968225 | 0.7362   | -1.057 |
| 98141_at   | 147.1   | 152.5   | 138.3   | 242.7   | 144.9   | 276.1   | 274.3   | 204.7   | 0.22008292  | 170.15   | 225       | 54.85    | 0.756222222 | 0.2201   | 1.314  |
| 98142_at   | 409.4   | 502.2   | 688.5   | 571.1   | 713.4   | 540.1   | 741.8   | 610.7   | 0.200009816 | 542.8    | 651.5     | 108.7    | 0.833154259 | 0.1938   | 1.212  |
| 98143_at   | 346.9   | 415.7   | 483.6   | 604.5   | 499.9   | 406.8   | 597.5   | 631.1   | 0.377873724 | 462.675  | 533.825   | 71.15    | 0.866716621 | 0.3685   | 1.161  |
| 98144_f_at | 534.8   | 857.5   | 557     | 661.4   | 936.7   | 375.1   | 595.3   | 588.6   | 0.842512283 | 652.675  | 623.925   | 28.75    | 1.046079256 | 0.7259   | -1.082 |
| 98146_at   | 1242.7  | 1663.4  | 1617.9  | 1469.7  | 1517.6  | 1254.3  | 1226.5  | 1503    | 0.356361768 | 1498.425 | 1375.35   | 123.075  | 1.089486313 | 0.3709   | -1.088 |
| 98147_at   | 721.4   | 704.2   | 785.5   | 856.2   | 778.8   | 702.8   | 792.5   | 795.4   | 0.989775555 | 766.825  | 767.375   | 0.55     | 0.999283271 | 0.9649   | 1.002  |
| 98148_at   | 110.4   | 85.4    | 67.5    | 79.8    | 66.7    | 114.2   | 76.8    | 51.7    | 0.621754813 | 85.775   | 77.35     | 8.425    | 1.108920491 | 0.5288   | -1.139 |
| 98149_s_at | 2534.1  | 2663.2  | 2196.2  | 2222.6  | 2223.3  | 1867.5  | 1949.8  | 1758.1  | 0.025237222 | 2404.025 | 1949.675  | 454.35   | 1.23303884  | 0.02287  | -1.233 |
| 98150_at   | 2078.5  | 2165.1  | 2127.6  | 1828.4  | 1792.6  | 2120.5  | 1839.7  | 1893.5  | 0.236162001 | 2049.9   | 1911.575  | 138.325  | 1.072361796 | 0.2379   | -1.072 |
| 98151_s_at | 482.3   | 498.5   | 826.1   | 864.1   | 571.2   | 687.6   | 958.8   | 903.9   | 0.443758373 | 667.75   | 780.375   | 112.625  | 0.85567836  | 0.4217   | 1.187  |
| 98152_at   | 2187.6  | 1760.9  | 2612.9  | 2384.1  | 2107.4  | 2867.7  | 2513.9  | 2384.3  | 0.371706724 | 2236.375 | 2468.325  | 231.95   | 0.906029392 | 0.3683   | 1.108  |
| 98153_at   | 2314.2  | 2346.7  | 2087    | 1677.8  | 2672.4  | 2112    | 2160.9  | 2050.6  | 0.523066088 | 2106.425 | 2248.975  | 142.55   | 0.936615569 | 0.5116   | 1.071  |
| 98154_at   | 405.5   | 444.1   | 467.3   | 624.4   | 561.7   | 389.8   | 491.1   | 597     | 0.723746333 | 485.325  | 509.9     | 24.575   | 0.951804275 | 0.719    | 1.051  |
| 98155_r_at | 1949.1  | 1628.1  | 1339.2  | 1206.1  | 1149.9  | 1397.6  | 1092.5  | 1146    | 0.134641044 | 1530.625 | 1196.5    | 334.125  | 1.279251985 | 0.09825  | -1.263 |
| 98168_at   | 11842.9 | 14205.8 | 9146.7  | 9226.2  | 10565.6 | 9209.8  | 10052.1 | 9285.8  | 0.357753411 | 11105.4  | 9778.325  | 1327.075 | 1.135715984 | 0.3542   | -1.118 |
| 98169_s_at | 805.2   | 595.2   | 557.7   | 698.7   | 490.6   | 610.7   | 546.5   | 544.2   | 0.12657176  | 664.2    | 548       | 116.2    | 1.212043796 | 0.09627  | -1.203 |
| 98240_at   | 27.4    | 33      | 36      | 18.1    | 11.9    | 39      | 13.2    | 37.2    | 0.711149355 | 28.625   | 25.325    | 3.3      | 1.130306022 | 0.5294   | -1.268 |
| 98245_at   | 211.5   | 176.5   | 303.7   | 285.6   | 165     | 244.8   | 276.5   | 246.3   | 0.781602071 | 244.325  | 233.15    | 11.175   | 1.047930517 | 0.819    | -1.042 |
| 98247_at   | 18.4    | 16.7    | 14.5    | 18.4    | 13.3    | 17.7    | 20.9    | 14.8    | 0.872431279 | 17       | 16.675    | 0.325    | 1.019490255 | 0.798    | 1.031  |
| 98254_f_at | 8066.9  | 9770.9  | 7835.3  | 7651.5  | 9039.6  | 9529.6  | 8917.8  | 8507.8  | 0.27572631  | 8331.15  | 8998.7    | 667.55   | 0.925817062 | 0.2284   | 1.084  |
| 98276_at   | 10.6    | 14.7    | 22.5    | 18.5    | 7.7     | 22.5    | 22.3    | 19      | 0.774451347 | 16.575   | 17.875    | 1.3      | 0.927272727 | 0.9191   | 1.033  |
| 98277_at   | 237.2   | 162.5   | 143.1   | 157.5   | 123     | 235.1   | 133.8   | 162.5   | 0.739620394 | 175.075  | 163.6     | 11.475   | 1.070140587 | 0.6723   | -1.084 |
| 98278_at   | 310.1   | 130.3   | 166.5   | 187.1   | 205.6   | 256.4   | 260.7   | 200.3   | 0.487426132 | 198.5    | 230.75    | 32.25    | 0.860238353 | 0.3555   | 1.216  |
| 98279_at   | 11.3    | 20.7    | 13.4    | 16.3    | 11.8    | 15.7    | 13.3    | 10.8    | 0.326665969 | 15.425   | 12.9      | 2.525    | 1.195736434 | 0.3276   | -1.177 |
| 98280_at   | 118.5   | 91.6    | 108.2   | 118.3   | 75.7    | 93.3    | 117.6   | 137     | 0.837107641 | 109.15   | 105.9     | 3.25     | 1.03068933  | 0.74     | -1.051 |
| 98281_at   | 7.4     | 1.6     | 1.7     | 4       | 1.2     | 22.1    | 1.3     | 5       | 0.516395226 | 3.675    | 7.4       | 3.725    | 0.496621622 | 0.8056   | 1.221  |
| 98282_at   | 13.7    | 5.8     | 4.6     | 7.1     | 6.7     | 12.8    | 20.2    | 8.5     | 0.291365563 | 7.8      | 12.05     | 4.25     | 0.647302905 | 0.2379   | 1.555  |
| 98283_at   | 303.2   | 164.6   | 92.1    | 238.1   | 64.3    | 112.1   | 168.4   | 266     | 0.485321992 | 199.5    | 152.7     | 46.8     | 1.306483301 | 0.4719   | -1.357 |
| 98284_f_at | 293.2   | 309.9   | 326     | 697.5   | 317.9   | 476.2   | 421.3   | 486.6   | 0.865876104 | 406.65   | 425.5     | 18.85    | 0.955699177 | 0.6704   | 1.107  |
| 98285_at   | 106.2   | 67      | 180.5   | 96.9    | 57      | 105.9   | 142.4   | 109.9   | 0.777819102 | 112.65   | 103.8     | 8.85     | 1.085260116 | 0.8149   | -1.071 |
| 98286_at   | 23.1    | 59.6    | 20.1    | 21      | 19.8    | 21.9    | 49.5    | 14.9    | 0.732769279 | 30.95    | 26.525    | 4.425    | 1.166823751 | 0.6998   | -1.159 |
| 98287_at   | 76.9    | 77.5    | 30.8    | 82.3    | 75.5    | 102.1   | 48.5    | 89      | 0.501827661 | 66.875   | 78.775    | 11.9     | 0.848936845 | 0.5169   | 1.218  |



|            |         |         |         |         |         |         |         |         |             |           |           |         |             |          |        |
|------------|---------|---------|---------|---------|---------|---------|---------|---------|-------------|-----------|-----------|---------|-------------|----------|--------|
| 98288_at   | 13.3    | 10.8    | 8.4     | 7.4     | 11.4    | 15.3    | 10.9    | 13      | 0.159633682 | 9.975     | 12.65     | 2.675   | 0.788537549 | 0.1413   | 1.291  |
| 98289_at   | 251.5   | 173.7   | 167.4   | 171.7   | 141.6   | 261.2   | 161.9   | 148.8   | 0.726302765 | 191.075   | 178.375   | 12.7    | 1.071198318 | 0.6329   | -1.09  |
| 98290_at   | 185.3   | 136.1   | 120.3   | 188.8   | 149.5   | 242.7   | 140.1   | 118.6   | 0.881136486 | 157.625   | 162.725   | 5.1     | 0.96865878  | 0.9485   | 1.013  |
| 98291_at   | 310.4   | 229.7   | 278.8   | 249.7   | 313.6   | 287.3   | 326.6   | 235.2   | 0.414420641 | 267.15    | 290.675   | 23.525  | 0.919067687 | 0.4304   | 1.087  |
| 98292_at   | 45.5    | 69.4    | 41.4    | 64.3    | 12.7    | 57.5    | 48.3    | 67.4    | 0.557205543 | 55.15     | 46.475    | 8.675   | 1.186659494 | 0.4632   | -1.37  |
| 98293_g_at | 14.1    | 6.7     | 30.3    | 35.8    | 31.8    | 47.4    | 28.8    | 15.4    | 0.37190916  | 21.725    | 30.85     | 9.125   | 0.704213938 | 0.3382   | 1.598  |
| 98294_at   | 12.1    | 13.9    | 6.7     | 9.2     | 7.7     | 13.9    | 6.5     | 14.5    | 0.948802527 | 10.475    | 10.65     | 0.175   | 0.983568075 | 0.9667   | 1.011  |
| 98295_at   | 282.6   | 189     | 239.9   | 182.4   | 161.8   | 337.1   | 173.9   | 251.5   | 0.877785907 | 223.475   | 231.075   | 7.6     | 0.967110246 | 0.9807   | 1.005  |
| 98296_at   | 93.1    | 152.6   | 141.6   | 161.5   | 125.5   | 178.6   | 142.5   | 146.6   | 0.579510169 | 137.2     | 148.3     | 11.1    | 0.925151719 | 0.5515   | 1.096  |
| 98297_at   | 10.8    | 15.3    | 5.8     | 26.9    | 3.2     | 5.5     | 3.7     | 10.2    | 0.136170873 | 14.7      | 5.65      | 9.05    | 2.601769912 | 0.06927  | -2.49  |
| 98298_at   | 260.5   | 212.2   | 216.2   | 243.5   | 177.5   | 318.1   | 255.8   | 267.2   | 0.529142533 | 233.1     | 254.65    | 21.55   | 0.915374043 | 0.6121   | 1.073  |
| 98299_s_at | 33.3    | 5.3     | 15.2    | 15.8    | 12.8    | 32.3    | 18      | 8.9     | 0.940855733 | 17.4      | 18        | 0.6     | 0.966666667 | 0.8205   | 1.116  |
| 98300_at   | 40.6    | 15.3    | 20.3    | 82.2    | 17.9    | 14.2    | 13.7    | 23.2    | 0.23851282  | 39.6      | 17.25     | 22.35   | 2.295652174 | 0.1567   | -1.895 |
| 98301_at   | 71.5    | 47.9    | 29.3    | 62.5    | 49.4    | 66.1    | 41.6    | 34.5    | 0.684854675 | 52.8      | 47.9      | 4.9     | 1.102296451 | 0.7716   | -1.076 |
| 98302_at   | 6.5     | 8.7     | 3.8     | 12.7    | 7.9     | 7.2     | 4.2     | 7.2     | 0.560230095 | 7.925     | 6.625     | 1.3     | 1.196226415 | 0.7192   | -1.117 |
| 98303_at   | 234.7   | 145.6   | 193.4   | 204.7   | 96.4    | 207.6   | 212.3   | 183.2   | 0.570883899 | 194.6     | 174.875   | 19.725  | 1.112794853 | 0.5374   | -1.148 |
| 98304_at   | 73.3    | 49.1    | 47.7    | 41.3    | 59.2    | 86.1    | 39.2    | 45.3    | 0.728713979 | 52.85     | 57.45     | 4.6     | 0.919930374 | 0.785    | 1.062  |
| 98305_at   | 102     | 145     | 231.4   | 263.6   | 98.5    | 113.8   | 224.5   | 175.8   | 0.521871517 | 185.5     | 153.15    | 32.35   | 1.211230819 | 0.5619   | -1.195 |
| 98306_g_at | 652.5   | 541.4   | 767.6   | 705.2   | 380.2   | 619.6   | 538.5   | 641.7   | 0.163585282 | 666.675   | 545       | 121.675 | 1.223256881 | 0.1801   | -1.238 |
| 98307_at   | 64.5    | 80.2    | 53      | 68.3    | 57.7    | 80.3    | 71.1    | 66      | 0.767244222 | 66.5      | 68.775    | 2.275   | 0.96692112  | 0.7496   | 1.037  |
| 98308_at   | 20.7    | 35.8    | 31.3    | 45.8    | 72.8    | 51.4    | 20.4    | 39.9    | 0.349563791 | 33.4      | 46.125    | 12.725  | 0.724119241 | 0.4352   | 1.302  |
| 98309_at   | 64.8    | 73.8    | 51      | 26.2    | 49      | 78.1    | 11      | 55.4    | 0.760000476 | 53.95     | 48.375    | 5.575   | 1.115245478 | 0.6252   | -1.288 |
| 98310_at   | 55.2    | 59.2    | 91.6    | 49.4    | 74.7    | 148.6   | 71.5    | 73.5    | 0.245588239 | 63.85     | 92.075    | 28.225  | 0.693456421 | 0.1745   | 1.41   |
| 98311_at   | 86.3    | 66.2    | 33.3    | 37.9    | 9.6     | 21.7    | 13.9    | 11.1    | 0.040765675 | 55.925    | 14.075    | 41.85   | 3.973357016 | 0.003323 | -3.873 |
| 98312_at   | 63.2    | 95.2    | 94.5    | 98.9    | 44.4    | 93.4    | 112.7   | 78.7    | 0.748643675 | 87.95     | 82.3      | 5.65    | 1.068651276 | 0.6577   | -1.112 |
| 98313_at   | 132     | 124.2   | 106.4   | 283.8   | 88.8    | 137.4   | 285.6   | 262.9   | 0.629357256 | 161.6     | 193.675   | 32.075  | 0.834387505 | 0.6787   | 1.166  |
| 98314_g_at | 218.9   | 140.5   | 137     | 273.5   | 100     | 165.2   | 288.8   | 256.5   | 0.858131711 | 192.475   | 202.625   | 10.15   | 0.949907465 | 0.9608   | 1.015  |
| 98315_at   | 47.2    | 57.3    | 36.5    | 36.6    | 37.6    | 63.7    | 35      | 46.4    | 0.881516047 | 44.4      | 45.675    | 1.275   | 0.972085386 | 0.9183   | 1.019  |
| 98316_at   | 20.2    | 42.4    | 52.6    | 71.8    | 53.3    | 16.3    | 16.6    | 71.4    | 0.689195795 | 46.75     | 39.4      | 7.35    | 1.186548223 | 0.565    | -1.332 |
| 98317_at   | 48.4    | 20.4    | 22.7    | 36.6    | 30      | 48.9    | 94.1    | 68.1    | 0.131164908 | 32.025    | 60.275    | 28.25   | 0.531314807 | 0.1031   | 1.839  |
| 98318_at   | 54.9    | 38.5    | 35.2    | 39.9    | 41.8    | 47.9    | 67.4    | 129.6   | 0.238208998 | 42.125    | 71.675    | 29.55   | 0.587722358 | 0.1528   | 1.557  |
| 98319_at   | 36.2    | 42.5    | 37.8    | 24.9    | 29.7    | 15.6    | 43.8    | 54.8    | 0.949544158 | 35.35     | 35.975    | 0.625   | 0.982626824 | 0.8319   | -1.068 |
| 98320_at   | 26.2    | 19      | 14.8    | 31.8    | 37.7    | 26      | 38.5    | 34.5    | 0.058522897 | 22.95     | 34.175    | 11.225  | 0.671543526 | 0.06698  | 1.537  |
| 98321_at   | 12      | 11.3    | 14.2    | 11.1    | 13.1    | 15.9    | 10.4    | 10.7    | 0.808311199 | 12.15     | 12.525    | 0.375   | 0.97005988  | 0.8764   | 1.019  |
| 98322_at   | 151.8   | 144.7   | 198.3   | 171     | 167.3   | 266.4   | 184.1   | 207.2   | 0.172671064 | 166.45    | 206.25    | 39.8    | 0.807030303 | 0.1434   | 1.229  |
| 98323_at   | 49.6    | 59.5    | 11.3    | 36.2    | 33.5    | 73.7    | 33.2    | 51.3    | 0.558576048 | 39.15     | 47.925    | 8.775   | 0.816901408 | 0.4848   | 1.366  |
| 98324_at   | 53.7    | 37.7    | 63.6    | 52.7    | 73.2    | 77.2    | 57.5    | 50.7    | 0.17566478  | 51.925    | 64.65     | 12.725  | 0.80317092  | 0.1854   | 1.248  |
| 98325_at   | 1.4     | 1.7     | 0.7     | 0.5     | 1.6     | 2.6     | 1.4     | 0.7     | 0.345411813 | 1.075     | 1.575     | 0.5     | 0.682539683 | 0.3444   | 1.49   |
| 98326_f_at | 5.8     | 1.9     | 0.8     | 1.6     | 2.4     | 4       | 0.8     | 4.3     | 0.808736209 | 2.525     | 2.875     | 0.35    | 0.87826087  | 0.7109   | 1.243  |
| 98327_at   | 2.1     | 2.6     | 0.8     | 3       | 1.6     | 1.3     | 1.3     | 13.6    | 0.503855822 | 2.125     | 4.45      | 2.325   | 0.47752809  | 0.6836   | 1.32   |
| 98328_at   | 2.4     | 6       | 1.5     | 4.9     | 2       | 5.2     | 3.1     | 6.8     | 0.714928683 | 3.7       | 4.275     | 0.575   | 0.865497076 | 0.675    | 1.205  |
| 98329_at   | 41.3    | 24.5    | 25.4    | 39.7    | 20.3    | 16.1    | 33.1    | 20.2    | 0.129248124 | 32.725    | 22.425    | 10.3    | 1.459308807 | 0.1115   | -1.471 |
| 98330_at   | 124.7   | 89.4    | 101.2   | 114.7   | 47.3    | 66.3    | 39.2    | 71      | 0.00311061  | 107.5     | 55.95     | 51.55   | 1.921358356 | 0.005327 | -1.962 |
| 98331_at   | 7626.8  | 9742.6  | 6991    | 8678.1  | 7326.5  | 6900.7  | 10920.6 | 9660.1  | 0.711717797 | 8259.625  | 8701.975  | 442.35  | 0.949166712 | 0.7604   | 1.043  |
| 98332_at   | 117.2   | 127.1   | 98.9    | 112.8   | 110.9   | 138.8   | 24.2    | 154.7   | 0.831263492 | 114       | 107.15    | 6.85    | 1.063929071 | 0.5656   | -1.303 |
| 98333_at   | 20383.9 | 23218.3 | 14022.4 | 16109.2 | 17317   | 16007   | 17734.8 | 18567.6 | 0.660647224 | 18433.45  | 17406.6   | 1026.85 | 1.058991992 | 0.7485   | 1.04   |
| 98334_at   | 10.6    | 21.1    | 2.3     | 5.3     | 22.2    | 7.6     | 3.8     | 17      | 0.649434875 | 9.825     | 12.65     | 2.825   | 0.776679842 | 0.6019   | 1.41   |
| 98335_at   | 871.9   | 843.6   | 1022.8  | 985.4   | 1109.1  | 972.9   | 1229    | 1014.7  | 0.083085925 | 930.925   | 1081.425  | 150.5   | 0.860831773 | 0.07625  | 1.161  |
| 98336_s_at | 112.2   | 37.9    | 93.1    | 146.6   | 16.2    | 63.4    | 182.8   | 55.4    | 0.689561792 | 97.45     | 79.45     | 18      | 1.226557583 | 0.484    | -1.538 |
| 98337_at   | 83.2    | 67      | 62.2    | 75.5    | 81.2    | 86.7    | 20.4    | 61.8    | 0.583917123 | 71.975    | 62.525    | 9.45    | 1.151139544 | 0.46     | -1.311 |
| 98338_at   | 107.2   | 97.6    | 95.2    | 76.6    | 68.3    | 145.4   | 86.4    | 88      | 0.880544152 | 94.15     | 97.025    | 2.875   | 0.970368462 | 0.9892   | 1.002  |
| 98339_at   | 296.2   | 171.3   | 203.2   | 143.9   | 229.1   | 244.2   | 179.7   | 198.4   | 0.811632727 | 203.65    | 212.85    | 9.2     | 0.956777073 | 0.6776   | 1.077  |
| 98340_at   | 74.6    | 46.7    | 79.1    | 141     | 86.6    | 107.6   | 131.2   | 146.5   | 0.227425844 | 85.35     | 117.975   | 32.625  | 0.72345836  | 0.1838   | 1.465  |
| 98341_f_at | 72.1    | 166.8   | 171.6   | 211.5   | 159.3   | 68.3    | 151.7   | 148.8   | 0.545728747 | 155.5     | 132.025   | 23.475  | 1.177807233 | 0.6614   | -1.155 |
| 98342_at   | 18485.7 | 21746.9 | 12788.8 | 14024.9 | 16261.5 | 15462.7 | 15915.6 | 15596.3 | 0.676445857 | 16761.575 | 15809.025 | 952.55  | 1.060253558 | 0.7792   | -1.037 |
| 98343_s_at | 11.7    | 9.9     | 3.1     | 11.4    | 14      | 34.7    | 5.1     | 26.4    | 0.191639063 | 9.025     | 20.05     | 11.025  | 0.450124688 | 0.2401   | 2      |



|            |        |        |        |        |        |        |        |        |             |          |          |         |             |         |        |
|------------|--------|--------|--------|--------|--------|--------|--------|--------|-------------|----------|----------|---------|-------------|---------|--------|
| 98344_f_at | 957.2  | 579.6  | 891    | 789.1  | 776.5  | 1109.9 | 885.7  | 896.4  | 0.337191031 | 804.225  | 917.125  | 112.9   | 0.876897915 | 0.3321  | 1.151  |
| 98345_at   | 3.5    | 2.6    | 1.2    | 3.3    | 9.7    | 2.7    | 3.1    | 13.9   | 0.180743278 | 2.65     | 7.35     | 4.7     | 0.360544218 | 0.127   | 2.341  |
| 98346_at   | 409.1  | 524.2  | 318.9  | 400.2  | 363.5  | 396.2  | 431.5  | 467.6  | 0.974721518 | 413.1    | 414.7    | 1.6     | 0.996141789 | 0.9006  | 1.015  |
| 98347_at   | 5.1    | 3.7    | 2.6    | 14.1   | 6.7    | 13.1   | 4.2    | 7      | 0.687084228 | 6.375    | 7.75     | 1.375   | 0.822580645 | 0.4785  | 1.389  |
| 98348_at   | 127    | 85.3   | 89.6   | 105.3  | 90.6   | 83.8   | 77.3   | 100.3  | 0.256920468 | 101.8    | 88       | 13.8    | 1.156818182 | 0.2384  | -1.148 |
| 98349_at   | 264.5  | 230.7  | 389.4  | 410.9  | 118.7  | 205.8  | 542    | 348.5  | 0.853553357 | 323.875  | 303.75   | 20.125  | 1.066255144 | 0.6197  | -1.206 |
| 98350_at   | 62.2   | 60.5   | 24.6   | 62.1   | 51.3   | 54.9   | 49.6   | 33.4   | 0.650407452 | 52.35    | 47.3     | 5.05    | 1.106765328 | 0.8455  | -1.053 |
| 98351_g_at | 99.2   | 91     | 76.8   | 88.5   | 63.4   | 199.8  | 80.3   | 107.8  | 0.490560263 | 88.875   | 112.825  | 23.95   | 0.787724352 | 0.587   | 1.157  |
| 98352_r_at | 75.7   | 45.1   | 55.4   | 49.2   | 36.6   | 78.4   | 70.6   | 46.8   | 0.888872438 | 56.35    | 58.1     | 1.75    | 0.969879518 | 0.984   | 1.004  |
| 98353_at   | 10.6   | 6.6    | 11.7   | 8.6    | 25.7   | 8      | 18.9   | 27.6   | 0.091646883 | 9.375    | 20.05    | 10.675  | 0.467581047 | 0.07154 | 1.979  |
| 98354_at   | 41.9   | 11.2   | 20.1   | 7.3    | 44.8   | 50.8   | 26.9   | 14.6   | 0.258875557 | 20.125   | 34.275   | 14.15   | 0.587162655 | 0.2254  | 1.897  |
| 98355_at   | 163.3  | 227    | 187.6  | 235.3  | 183.3  | 257.6  | 284.5  | 232.3  | 0.237691197 | 203.3    | 239.425  | 36.125  | 0.849117678 | 0.2519  | 1.175  |
| 98356_at   | 252.5  | 237.9  | 276    | 335.2  | 261.6  | 289.2  | 250.4  | 326.5  | 0.819561925 | 275.4    | 281.925  | 6.525   | 0.976855547 | 0.7886  | 1.027  |
| 98357_at   | 76.8   | 37.8   | 58.6   | 64.3   | 55     | 111.3  | 66.5   | 74.4   | 0.285067131 | 59.375   | 76.8     | 17.425  | 0.773111979 | 0.2745  | 1.29   |
| 98358_at   | 8.6    | 30.3   | 8.7    | 7.7    | 5.4    | 29.7   | 7.6    | 25.1   | 0.717306229 | 13.825   | 16.95    | 3.125   | 0.815634218 | 0.8055  | 1.148  |
| 98360_at   | 189.5  | 167.5  | 146.6  | 168.9  | 131.6  | 251.8  | 151.7  | 173.4  | 0.763256693 | 168.125  | 177.125  | 9       | 0.949188426 | 0.8682  | 1.026  |
| 98361_at   | 123    | 116.4  | 116.4  | 151    | 60.9   | 115.4  | 145.5  | 103    | 0.346381958 | 126.7    | 106.2    | 20.5    | 1.193032015 | 0.3056  | -1.243 |
| 98362_s_at | 14.8   | 3      | 25.5   | 28.4   | 13.5   | 12.8   | 15.5   | 16.2   | 0.596544161 | 17.925   | 14.5     | 3.425   | 1.236206897 | 0.8883  | 1.08   |
| 98363_at   | 4.1    | 15.9   | 10.2   | 1.6    | 12     | 16.2   | 12.7   | 11     | 0.218413707 | 7.95     | 12.975   | 5.025   | 0.612716763 | 0.1667  | 2.242  |
| 98364_at   | 47.4   | 20.3   | 10.4   | 24.6   | 20.4   | 27.2   | 37     | 27.4   | 0.798583918 | 25.675   | 28       | 2.325   | 0.916964286 | 0.5589  | 1.231  |
| 98365_at   | 78.5   | 12.5   | 44.2   | 31.9   | 56.4   | 62.3   | 52.3   | 77     | 0.247733772 | 41.775   | 62       | 20.225  | 0.673790323 | 0.19    | 1.787  |
| 98366_at   | 74.1   | 74.8   | 99.5   | 128.9  | 38.8   | 70.6   | 120.1  | 136.9  | 0.920746632 | 94.325   | 91.6     | 2.725   | 1.029748908 | 0.7309  | -1.121 |
| 98367_at   | 81.8   | 100.3  | 69     | 92.3   | 71.9   | 100.6  | 89.2   | 123    | 0.451858504 | 85.85    | 96.175   | 10.325  | 0.892643618 | 0.4789  | 1.11   |
| 98368_at   | 5.6    | 5.5    | 3      | 4.8    | 4.6    | 6.6    | 5.3    | 5.2    | 0.381523514 | 4.725    | 5.425    | 0.7     | 0.870967742 | 0.359   | 1.178  |
| 98369_f_at | 2427.2 | 2058.7 | 1977.6 | 2049   | 2209.1 | 2407.4 | 2207.2 | 2250.5 | 0.273841185 | 2128.125 | 2268.55  | 140.425 | 0.938099226 | 0.2335  | 1.069  |
| 98370_at   | 42.3   | 42.2   | 45.6   | 21.5   | 59.8   | 34.2   | 80.1   | 46.3   | 0.191279731 | 37.9     | 55.1     | 17.2    | 0.68784029  | 0.197   | 1.443  |
| 98371_at   | 55.7   | 14.9   | 21.3   | 33.6   | 16.5   | 30.6   | 44.5   | 26     | 0.860773965 | 31.375   | 29.4     | 1.975   | 1.067176871 | 0.9888  | 1.005  |
| 98372_at   | 101.1  | 108    | 158.1  | 182.1  | 177.8  | 121.7  | 269.8  | 221.8  | 0.164443512 | 137.325  | 197.775  | 60.45   | 0.69434964  | 0.1638  | 1.424  |
| 98373_at   | 14.5   | 17.3   | 30.8   | 27.5   | 37.2   | 47     | 37.9   | 43.3   | 0.009626896 | 22.525   | 41.35    | 18.825  | 0.544740024 | 0.01365 | 1.915  |
| 98374_at   | 53.4   | 69.3   | 37.1   | 39.9   | 35.5   | 79.6   | 20.2   | 39.8   | 0.692694652 | 49.925   | 43.775   | 6.15    | 1.140491148 | 0.511   | -1.247 |
| 98375_at   | 20.6   | 18.7   | 19.6   | 16.2   | 15.4   | 22.1   | 42.4   | 20.3   | 0.371102003 | 18.775   | 25.05    | 6.275   | 0.749500998 | 0.3618  | 1.244  |
| 98376_at   | 6.8    | 7.7    | 3.6    | 32.1   | 7      | 5.3    | 5      | 7.3    | 0.402819244 | 12.55    | 6.15     | 6.4     | 2.040650407 | 0.457   | -1.453 |
| 98379_r_at | 467.9  | 377.1  | 340.7  | 414.3  | 197.9  | 234.3  | 387.8  | 415.2  | 0.201077795 | 400      | 308.8    | 91.2    | 1.295336788 | 0.1745  | -1.351 |
| 98380_at   | 59.5   | 73     | 67.9   | 224.6  | 64.7   | 73.5   | 123.1  | 171.1  | 0.969853688 | 106.25   | 108.1    | 1.85    | 0.982886216 | 0.795   | 1.109  |
| 98381_at   | 9.3    | 47.7   | 8.1    | 21.8   | 11.5   | 24     | 9.8    | 28.1   | 0.757198982 | 21.725   | 18.35    | 3.375   | 1.183923706 | 0.987   | 1.008  |
| 98382_f_at | 63.3   | 49.3   | 36.7   | 34.1   | 57.6   | 100.3  | 46.2   | 44.7   | 0.320435304 | 45.85    | 62.2     | 16.35   | 0.737138264 | 0.2796  | 1.322  |
| 98383_r_at | 113.2  | 42.1   | 48.6   | 102.5  | 68.4   | 203.1  | 81.4   | 73.1   | 0.458796904 | 76.6     | 106.5    | 29.9    | 0.719248826 | 0.4186  | 1.366  |
| 98384_at   | 27.7   | 13.8   | 2.5    | 5.1    | 10.7   | 19     | 14.1   | 7.5    | 0.933391886 | 12.275   | 12.825   | 0.55    | 0.95711501  | 0.5342  | 1.454  |
| 98385_at   | 116.4  | 55.8   | 90     | 152.1  | 93.8   | 118.7  | 103    | 105.1  | 0.944494859 | 103.575  | 105.15   | 1.575   | 0.985021398 | 0.7411  | 1.079  |
| 98386_s_at | 210.7  | 146.7  | 196.3  | 252    | 144.7  | 201.9  | 155.2  | 193.9  | 0.335642965 | 201.425  | 173.925  | 27.5    | 1.15811413  | 0.3582  | -1.149 |
| 98387_at   | 23     | 9      | 6.9    | 12.1   | 6.4    | 11.5   | 8.2    | 9.8    | 0.376780771 | 12.75    | 8.975    | 3.775   | 1.420612813 | 0.3843  | -1.311 |
| 98388_at   | 9.9    | 8      | 11.5   | 34.2   | 12.3   | 11.4   | 7.1    | 5.3    | 0.349983194 | 15.9     | 9.025    | 6.875   | 1.761772853 | 0.2853  | -1.56  |
| 98389_at   | 14.5   | 11.4   | 15.5   | 10.8   | 11.1   | 17.7   | 12.2   | 28.3   | 0.363284142 | 13.05    | 17.325   | 4.275   | 0.753246753 | 0.3684  | 1.251  |
| 98390_at   | 47.9   | 100    | 128.9  | 130.5  | 108.8  | 170.8  | 111.9  | 139.5  | 0.250280808 | 101.825  | 132.75   | 30.925  | 0.767043315 | 0.2611  | 1.378  |
| 98391_at   | 3.2    | 3.7    | 12     | 6.2    | 6.8    | 4.9    | 3.4    | 18.3   | 0.621799612 | 6.275    | 8.35     | 2.075   | 0.751497006 | 0.6822  | 1.224  |
| 98392_at   | 130    | 85.4   | 103.4  | 92.1   | 86.6   | 115.6  | 106.1  | 105.7  | 0.94910382  | 102.725  | 103.5    | 0.775   | 0.992512077 | 0.8957  | 1.015  |
| 98394_at   | 5.5    | 5.4    | 2.5    | 4.8    | 3.9    | 6.1    | 3.6    | 3.7    | 0.814977605 | 4.55     | 4.325    | 0.225   | 1.052023121 | 0.8421  | -1.047 |
| 98395_at   | 6.4    | 11.8   | 15     | 10.1   | 10.4   | 10.6   | 4.5    | 10.2   | 0.445481981 | 10.825   | 8.925    | 1.9     | 1.212885154 | 0.4849  | -1.229 |
| 98397_at   | 285.3  | 243.1  | 297.8  | 275.5  | 314.4  | 286.9  | 293.4  | 420.7  | 0.187035088 | 275.425  | 328.85   | 53.425  | 0.837539912 | 0.1396  | 1.183  |
| 98398_s_at | 100.1  | 81.5   | 74.3   | 89.5   | 91.8   | 89     | 90.2   | 77.5   | 0.908803154 | 86.35    | 87.125   | 0.775   | 0.991104735 | 0.8688  | 1.013  |
| 98400_at   | 485.9  | 363.2  | 449.3  | 549    | 465.7  | 450.2  | 477.7  | 525.7  | 0.691115818 | 461.85   | 479.825  | 17.975  | 0.962538425 | 0.6274  | 1.049  |
| 98401_at   | 41.4   | 24.5   | 10.1   | 7.5    | 5      | 30.1   | 27.4   | 15.6   | 0.894265716 | 20.875   | 19.525   | 1.35    | 1.069142125 | 0.9399  | -1.046 |
| 98402_at   | 2575.2 | 2098.2 | 1826.3 | 2400.8 | 2133.1 | 2301.5 | 2241.4 | 2418.5 | 0.797187575 | 2225.125 | 2273.625 | 48.5    | 0.978668426 | 0.73    | 1.029  |
| 98403_at   | 451.4  | 441.3  | 564.7  | 608.2  | 433.5  | 444    | 505.8  | 508.5  | 0.39452096  | 516.4    | 472.95   | 43.45   | 1.091870177 | 0.4067  | -1.084 |
| 98404_at   | 5573.5 | 4232.8 | 4615.3 | 5002.7 | 4191.3 | 4449   | 4621.1 | 4859   | 0.359902133 | 4856.075 | 4530.1   | 325.975 | 1.071957573 | 0.36    | -1.068 |
| 98405_at   | 426.8  | 385.3  | 461.8  | 415.5  | 460.7  | 509.6  | 573.7  | 421.7  | 0.125278168 | 422.35   | 491.425  | 69.075  | 0.859439385 | 0.1016  | 1.158  |



|            |        |        |        |        |        |        |        |        |             |          |          |         |             |           |        |
|------------|--------|--------|--------|--------|--------|--------|--------|--------|-------------|----------|----------|---------|-------------|-----------|--------|
| 98406_at   | 10.5   | 7.8    | 6.4    | 4.7    | 8.5    | 13.2   | 6      | 9.2    | 0.370551975 | 7.35     | 9.225    | 1.875   | 0.796747967 | 0.3658    | 1.256  |
| 98407_at   | 483.5  | 558.1  | 709.8  | 757.9  | 376    | 481.3  | 620.2  | 841.7  | 0.706517726 | 627.325  | 579.8    | 47.525  | 1.08196792  | 0.6141    | -1.113 |
| 98408_at   | 91     | 61.4   | 66.8   | 86.3   | 42.9   | 54.4   | 76.2   | 65.1   | 0.151026161 | 76.375   | 59.65    | 16.725  | 1.280385583 | 0.1526    | -1.292 |
| 98409_at   | 369.7  | 395    | 417.7  | 414.2  | 426.5  | 412.1  | 486.6  | 531.4  | 0.095302731 | 399.15   | 464.15   | 65      | 0.859959065 | 0.06579   | 1.158  |
| 98410_at   | 223.1  | 245.7  | 183.4  | 178.9  | 225.9  | 285.8  | 203.5  | 280.9  | 0.165586193 | 207.775  | 249.025  | 41.25   | 0.834353981 | 0.164     | 1.197  |
| 98413_at   | 4.1    | 3      | 4      | 4.6    | 3.3    | 4.3    | 2.4    | 5.7    | 1           | 3.925    | 3.925    | 0       | 1           | 0.8758    | 1.034  |
| 98414_at   | 14.2   | 9.8    | 10.7   | 16.2   | 34.6   | 11.6   | 8.3    | 9.6    | 0.638592964 | 12.725   | 16.025   | 3.3     | 0.794071763 | 0.8439    | 1.074  |
| 98415_at   | 985.4  | 783.6  | 800.2  | 919.1  | 940.6  | 801.3  | 725.9  | 882.4  | 0.626632209 | 872.075  | 837.55   | 34.525  | 1.04122142  | 0.6257    | -1.041 |
| 98416_at   | 738.7  | 584.2  | 513.8  | 434.6  | 507.5  | 534.4  | 492.6  | 551.6  | 0.529769758 | 567.825  | 521.525  | 46.3    | 1.088778103 | 0.5798    | -1.069 |
| 98417_at   | 11     | 18.8   | 23.4   | 21.7   | 6.2    | 6.1    | 5.6    | 16.5   | 0.037560525 | 18.725   | 8.6      | 10.125  | 2.177325581 | 0.03284   | -2.34  |
| 98418_at   | 787.9  | 675.8  | 667.5  | 784.8  | 644.2  | 662.9  | 521.7  | 598    | 0.036821759 | 729      | 606.7    | 122.3   | 1.201582331 | 0.03912   | -1.203 |
| 98419_at   | 132.1  | 121.8  | 117.9  | 150.4  | 97.6   | 153.4  | 161.7  | 161.3  | 0.487176934 | 130.55   | 143.5    | 12.95   | 0.909756098 | 0.5775    | 1.082  |
| 98420_at   | 16.3   | 49.5   | 12.7   | 45.3   | 13.3   | 9.4    | 72.5   | 9      | 0.798792602 | 30.95    | 26.05    | 4.9     | 1.188099808 | 0.4986    | -1.544 |
| 98421_at   | 31.8   | 9.2    | 6.5    | 8.9    | 3.9    | 11.2   | 16.3   | 22.2   | 0.925053655 | 14.1     | 13.4     | 0.7     | 1.052238806 | 0.9758    | 1.016  |
| 98423_at   | 104.5  | 39.2   | 64.6   | 91     | 74.7   | 102.8  | 55.2   | 53.7   | 0.867341681 | 74.825   | 71.6     | 3.225   | 1.045041899 | 0.9599    | 1.014  |
| 98424_at   | 334.6  | 415.4  | 457.3  | 642.9  | 496.5  | 323.3  | 529.6  | 626    | 0.742144347 | 462.55   | 493.85   | 31.3    | 0.936620431 | 0.747     | 1.068  |
| 98426_at   | 229.7  | 250.5  | 276.8  | 263.7  | 246.4  | 357.9  | 223.5  | 261.3  | 0.61559261  | 255.175  | 272.275  | 17.1    | 0.93719585  | 0.6578    | 1.052  |
| 98427_s_at | 881.2  | 693.6  | 844.6  | 887.1  | 749.8  | 726.9  | 835.9  | 987.6  | 0.983849458 | 826.625  | 825.05   | 1.575   | 1.001908975 | 0.9622    | 1.004  |
| 98428_at   | 150.8  | 137.5  | 175.6  | 234.1  | 106.2  | 165.8  | 170.2  | 191    | 0.585553883 | 174.5    | 158.3    | 16.2    | 1.102337334 | 0.5876    | -1.105 |
| 98429_at   | 1185.9 | 1299.1 | 1434.6 | 1041.5 | 1064.1 | 1226.1 | 1037.4 | 1031.2 | 0.179249552 | 1240.275 | 1089.7   | 150.575 | 1.138180233 | 0.1661    | -1.133 |
| 98430_at   | 484.6  | 414.4  | 302.6  | 432.2  | 340.4  | 423.6  | 399.6  | 435.5  | 0.851163693 | 408.45   | 399.775  | 8.675   | 1.021699706 | 0.9243    | 1.011  |
| 98431_at   | 512    | 449.8  | 436.9  | 421.6  | 496.5  | 573.9  | 469.3  | 518.2  | 0.093546433 | 455.075  | 514.475  | 59.4    | 0.884542495 | 0.08671   | 1.13   |
| 98432_at   | 1328.9 | 1109.8 | 1515.7 | 1659.9 | 1373.9 | 1128.3 | 1483.1 | 1411.4 | 0.716653623 | 1403.575 | 1349.175 | 54.4    | 1.040320937 | 0.7625    | -1.034 |
| 98433_at   | 235    | 211.6  | 223.3  | 234.9  | 189    | 180.8  | 196.4  | 202.6  | 0.003758474 | 226.2    | 192.2    | 34      | 1.176899063 | 0.003492  | -1.177 |
| 98434_at   | 702.6  | 529.1  | 650.2  | 796.6  | 598.6  | 518.2  | 631.4  | 753    | 0.571894023 | 669.625  | 625.3    | 44.325  | 1.070885975 | 0.5844    | -1.069 |
| 98435_at   | 104.9  | 51.6   | 56.6   | 81.8   | 105.5  | 114.1  | 46     | 81.6   | 0.530423004 | 73.725   | 86.8     | 13.075  | 0.849366359 | 0.5945    | 1.159  |
| 98436_s_at | 266.9  | 282.3  | 368.5  | 391.4  | 284.5  | 401    | 675.8  | 570.8  | 0.172050439 | 327.275  | 483.025  | 155.75  | 0.677552922 | 0.1546    | 1.419  |
| 98437_at   | 510.9  | 593.6  | 575.7  | 380    | 838.2  | 768.3  | 712.3  | 703.7  | 0.008217607 | 515.05   | 755.625  | 240.575 | 0.681621175 | 0.01118   | 1.485  |
| 98438_f_at | 301.7  | 247.9  | 223.4  | 245.4  | 357.2  | 327    | 320.5  | 253.9  | 0.074022067 | 254.6    | 314.65   | 60.05   | 0.809153027 | 0.07203   | 1.234  |
| 98439_at   | 210.5  | 206.5  | 333    | 329.5  | 218.4  | 258.5  | 312.3  | 260.8  | 0.862668294 | 269.875  | 262.5    | 7.375   | 1.028095238 | 0.9538    | 1.009  |
| 98440_at   | 3383.5 | 2824.5 | 3272.1 | 3407.1 | 1659.2 | 1717.5 | 1857.5 | 1895   | 0.000609594 | 3221.8   | 1782.3   | 1439.5  | 1.807664254 | 0.0000347 | -1.805 |
| 98441_at   | 488.6  | 576    | 672.4  | 978.8  | 735.6  | 587.5  | 734.1  | 825.4  | 0.739856062 | 678.95   | 720.65   | 41.7    | 0.942135572 | 0.6178    | 1.09   |
| 98443_at   | 646.4  | 523.7  | 369.2  | 363.5  | 602.9  | 754.3  | 502.7  | 420.6  | 0.376484304 | 475.7    | 570.125  | 94.425  | 0.834378426 | 0.3573    | 1.206  |
| 98444_g_at | 38.2   | 48.9   | 25.8   | 28.8   | 28     | 41.4   | 27.6   | 41.9   | 0.918836408 | 35.425   | 34.725   | 0.7     | 1.020158387 | 0.9652    | 1.008  |
| 98445_at   | 255.6  | 180.3  | 274    | 236.1  | 241.2  | 157    | 149.3  | 159.3  | 0.090270396 | 236.5    | 176.7    | 59.8    | 1.338426712 | 0.08306   | -1.349 |
| 98446_s_at | 3631   | 3179.4 | 3069.1 | 2538   | 2884.9 | 3668.4 | 2984.5 | 2738.7 | 0.911713451 | 3104.375 | 3069.125 | 35.25   | 1.011485358 | 0.9242    | -1.01  |
| 98447_at   | 1146.1 | 883.1  | 1287.6 | 1049.2 | 818.1  | 759.1  | 749.8  | 729.2  | 0.027846903 | 1091.5   | 764.05   | 327.45  | 1.428571429 | 0.005779  | -1.417 |
| 98448_at   | 21.7   | 20.3   | 15.9   | 25.2   | 5      | 37.9   | 32.1   | 9.4    | 0.971290419 | 20.775   | 21.1     | 0.325   | 0.984597156 | 0.593     | -1.323 |
| 98449_at   | 354.6  | 317.4  | 293.7  | 356.7  | 328.4  | 330.9  | 298.6  | 275.7  | 0.313335512 | 330.6    | 308.4    | 22.2    | 1.071984436 | 0.3206    | -1.071 |
| 98451_at   | 236.3  | 217.9  | 346.4  | 257.9  | 282.8  | 212.6  | 329    | 327.9  | 0.574249617 | 264.625  | 288.075  | 23.45   | 0.918597587 | 0.5728    | 1.09   |
| 98452_at   | 56     | 55.8   | 85.1   | 80.6   | 66.5   | 84     | 80.7   | 97.6   | 0.253249681 | 69.375   | 82.2     | 12.825  | 0.843978102 | 0.2436    | 1.197  |
| 98453_at   | 23.6   | 23.7   | 18.4   | 37.1   | 18.1   | 22.8   | 37.2   | 25.1   | 0.98658071  | 25.7     | 25.8     | 0.1     | 0.996124031 | 0.9918    | 1.002  |
| 98454_at   | 529.9  | 570.9  | 634    | 620.5  | 522.8  | 593.5  | 425.9  | 490.4  | 0.111092257 | 588.825  | 508.15   | 80.675  | 1.158762177 | 0.1074    | -1.164 |
| 98455_at   | 841.4  | 1031   | 1381.4 | 1240.9 | 1144.4 | 1130.1 | 1389.3 | 1416   | 0.346511989 | 1123.675 | 1269.95  | 146.275 | 0.8848183   | 0.3232    | 1.144  |
| 98456_at   | 256.4  | 299.7  | 268.5  | 221.4  | 365.1  | 301    | 276.1  | 218.3  | 0.44715112  | 261.5    | 290.125  | 28.625  | 0.901335631 | 0.4814    | 1.097  |
| 98457_at   | 69.4   | 58.4   | 57.5   | 92.1   | 31.2   | 67.4   | 76.6   | 99.2   | 0.965114392 | 69.35    | 68.6     | 0.75    | 1.010932945 | 0.7964    | -1.076 |
| 98458_at   | 1720   | 1672.5 | 1159.2 | 968.4  | 1476.9 | 1584.6 | 1034.2 | 1077.5 | 0.72357219  | 1380.025 | 1293.3   | 86.725  | 1.067057141 | 0.7737    | -1.055 |
| 98459_at   | 779.3  | 649.2  | 742.9  | 676.1  | 587.8  | 633.3  | 586    | 543.3  | 0.016603656 | 711.875  | 587.6    | 124.275 | 1.211495916 | 0.0108    | -1.21  |
| 98460_at   | 771.9  | 713.3  | 1109.1 | 753.1  | 689.6  | 708.3  | 859.5  | 750.9  | 0.4406873   | 836.85   | 752.075  | 84.775  | 1.112721471 | 0.4314    | -1.099 |
| 98461_at   | 576.8  | 626.9  | 603.5  | 580.1  | 745    | 722.5  | 545.9  | 737.3  | 0.150212226 | 596.825  | 687.675  | 90.85   | 0.867888174 | 0.132     | 1.144  |
| 98462_s_at | 133.2  | 72.5   | 96.2   | 89.1   | 74.8   | 109.5  | 74.1   | 70.1   | 0.363741252 | 97.75    | 82.125   | 15.625  | 1.190258752 | 0.346     | -1.181 |
| 98463_at   | 876.8  | 761.7  | 1112.2 | 1336.9 | 733.8  | 679.2  | 920.3  | 1075   | 0.324231388 | 1021.9   | 852.075  | 169.825 | 1.199307573 | 0.3249    | -1.191 |
| 98464_at   | 126.6  | 190.5  | 308    | 316.1  | 241    | 195.6  | 178.1  | 222.8  | 0.623273334 | 235.3    | 209.375  | 25.925  | 1.123820896 | 0.8114    | -1.059 |
| 98465_f_at | 65     | 90.5   | 52     | 91.3   | 98.6   | 72.4   | 129.7  | 97.4   | 0.156096929 | 74.7     | 99.525   | 24.825  | 0.750565185 | 0.1577    | 1.34   |
| 98466_r_at | 13.3   | 11.6   | 5.7    | 18.1   | 14.9   | 17.2   | 17.9   | 19.2   | 0.137072669 | 12.175   | 17.3     | 5.125   | 0.703757225 | 0.1381    | 1.533  |
| 98467_at   | 13.3   | 11.7   | 39.1   | 14.2   | 27.5   | 22.6   | 12.6   | 12.8   | 0.929502172 | 19.575   | 18.875   | 0.7     | 1.037086093 | 0.9171    | 1.038  |



|            |        |        |        |        |        |        |        |        |             |          |          |          |             |          |        |
|------------|--------|--------|--------|--------|--------|--------|--------|--------|-------------|----------|----------|----------|-------------|----------|--------|
| 98468_r_at | 121.7  | 143.1  | 195.1  | 175.4  | 118    | 97.8   | 114.6  | 242.7  | 0.695922257 | 158.825  | 143.275  | 15.55    | 1.108532542 | 0.5228   | -1.168 |
| 98469_at   | 501.4  | 498.4  | 573.9  | 686.3  | 466    | 459.3  | 540.7  | 626.9  | 0.505412897 | 565      | 523.225  | 41.775   | 1.079841368 | 0.4938   | -1.079 |
| 98470_at   | 100.4  | 99.9   | 118.8  | 126.4  | 105.3  | 116.4  | 149.5  | 124.1  | 0.325344627 | 111.375  | 123.825  | 12.45    | 0.899454876 | 0.3183   | 1.109  |
| 98471_f_at | 400.4  | 118    | 127.6  | 152.3  | 82.2   | 70     | 74.7   | 289.3  | 0.444984061 | 199.575  | 129.05   | 70.525   | 1.546493607 | 0.2997   | -1.648 |
| 98472_at   | 83.3   | 86.5   | 71     | 84.6   | 76.9   | 74.7   | 62.2   | 70.3   | 0.07445698  | 81.35    | 71.025   | 10.325   | 1.145371348 | 0.08182  | -1.146 |
| 98473_at   | 68.1   | 77.2   | 51     | 74.4   | 84.4   | 97.2   | 31.5   | 67.6   | 0.878996429 | 67.675   | 70.175   | 2.5      | 0.964374777 | 0.9044   | -1.034 |
| 98474_r_at | 56.5   | 71.8   | 39.6   | 73.1   | 51     | 50.8   | 43.3   | 62.6   | 0.392665827 | 60.25    | 51.925   | 8.325    | 1.160327395 | 0.4556   | -1.137 |
| 98475_at   | 1106.8 | 1456.4 | 1448.9 | 1484.3 | 1511.2 | 1471.4 | 2028.9 | 1924.9 | 0.084156839 | 1374.1   | 1734.1   | 360      | 0.792399516 | 0.07756  | 1.258  |
| 98476_at   | 279.4  | 309.8  | 282.5  | 299.3  | 323.1  | 323.9  | 341.3  | 348.9  | 0.005148164 | 292.75   | 334.3    | 41.55    | 0.87571044  | 0.005149 | 1.142  |
| 98477_s_at | 113.1  | 147.1  | 106.9  | 126.1  | 89.4   | 137.7  | 105.9  | 111.8  | 0.401656663 | 123.3    | 111.2    | 12.1     | 1.10881295  | 0.3786   | -1.114 |
| 98478_at   | 1139.1 | 1237   | 1049.2 | 1306.1 | 1240.8 | 1151.4 | 1475.1 | 1455.9 | 0.186462159 | 1182.85  | 1330.8   | 147.95   | 0.88882627  | 0.1857   | 1.123  |
| 98479_f_at | 3.9    | 3.2    | 1.7    | 3.1    | 1.7    | 5      | 2.1    | 2.8    | 0.934496052 | 2.975    | 2.9      | 0.075    | 1.025862069 | 0.7956   | -1.082 |
| 98480_s_at | 2182.7 | 4176.5 | 3017.4 | 3157.3 | 3043.1 | 3478.3 | 1697.5 | 3542.7 | 0.755635387 | 3133.475 | 2940.4   | 193.075  | 1.065662835 | 0.7341   | -1.081 |
| 98481_at   | 105.8  | 26.5   | 23.8   | 53.2   | 43.3   | 114.9  | 98.3   | 69.3   | 0.285136191 | 52.325   | 81.45    | 29.125   | 0.642418662 | 0.2159   | 1.759  |
| 98482_at   | 93.2   | 206.2  | 241.4  | 146.5  | 134    | 204.7  | 156.4  | 210.3  | 0.909203489 | 171.825  | 176.35   | 4.525    | 0.9743408   | 0.7759   | 1.073  |
| 98483_at   | 331.8  | 361.6  | 432.4  | 454.3  | 407    | 381.7  | 415.6  | 446.7  | 0.606107032 | 395.025  | 412.75   | 17.725   | 0.957056329 | 0.5559   | 1.052  |
| 98484_at   | 280.8  | 237.3  | 194.1  | 219.9  | 212.7  | 318.7  | 205.8  | 235.4  | 0.761642621 | 233.025  | 243.15   | 10.125   | 0.958359038 | 0.784    | 1.037  |
| 98485_at   | 91.9   | 76.4   | 116    | 152.5  | 93     | 96     | 110.9  | 97.4   | 0.599048409 | 109.2    | 99.325   | 9.875    | 1.099421092 | 0.6965   | -1.065 |
| 98486_at   | 194.4  | 123.8  | 147    | 157.8  | 132    | 217.5  | 121.7  | 171.6  | 0.857621752 | 155.75   | 160.7    | 4.95     | 0.969197262 | 0.9141   | 1.018  |
| 98488_at   | 35.2   | 25.9   | 17.5   | 7.7    | 34.4   | 38.7   | 3.8    | 34.8   | 0.551168543 | 21.575   | 27.925   | 6.35     | 0.772605192 | 0.8965   | 1.092  |
| 98489_at   | 310.6  | 320.7  | 254.7  | 237.7  | 261.4  | 341.2  | 237.6  | 256.2  | 0.831722826 | 280.925  | 274.1    | 6.825    | 1.024899672 | 0.816    | -1.027 |
| 98490_at   | 247.4  | 224.7  | 307.7  | 315.1  | 137    | 233.2  | 363.5  | 258.2  | 0.64215495  | 273.725  | 247.975  | 25.75    | 1.103841113 | 0.5273   | -1.158 |
| 98491_at   | 438.9  | 407.8  | 545.3  | 487.7  | 340.6  | 475.9  | 498.1  | 493.1  | 0.720985093 | 469.925  | 451.925  | 18       | 1.039829618 | 0.7011   | -1.046 |
| 98492_at   | 1231.3 | 1024.2 | 1072.2 | 1023.2 | 1098.6 | 1195.6 | 1009.2 | 1093.3 | 0.860461819 | 1087.725 | 1099.175 | 11.45    | 0.989583096 | 0.842    | 1.012  |
| 98493_at   | 639    | 676.1  | 443.4  | 510.8  | 490.1  | 438.1  | 416.5  | 469.9  | 0.125166562 | 567.325  | 453.65   | 113.675  | 1.25057864  | 0.08992  | -1.235 |
| 98495_at   | 936.9  | 1172.3 | 1484.7 | 1284.5 | 1665.4 | 1424.5 | 1245.4 | 1260.3 | 0.278969564 | 1219.6   | 1398.9   | 179.3    | 0.871827865 | 0.2681   | 1.155  |
| 98496_at   | 553.5  | 556.7  | 622.7  | 712    | 595.6  | 627    | 701.1  | 711.7  | 0.349964731 | 611.225  | 658.85   | 47.625   | 0.927714958 | 0.331    | 1.081  |
| 98497_at   | 120.2  | 88.6   | 134.4  | 37.4   | 144    | 48.8   | 90.8   | 85.8   | 0.926483281 | 95.15    | 92.35    | 2.8      | 1.030319437 | 0.9873   | 1.006  |
| 98498_at   | 747.5  | 773.8  | 587.9  | 647.9  | 804.6  | 911.3  | 696.8  | 794.9  | 0.11746013  | 689.275  | 801.9    | 112.625  | 0.859552313 | 0.1192   | 1.165  |
| 98499_s_at | 523.1  | 304.6  | 399.7  | 274.5  | 250.4  | 448.3  | 351.3  | 315.8  | 0.643557416 | 375.475  | 341.45   | 34.025   | 1.099648558 | 0.6688   | -1.088 |
| 98500_at   | 42.4   | 31.1   | 45.7   | 50.6   | 34     | 67.6   | 58.3   | 50.1   | 0.279090264 | 42.45    | 52.5     | 10.05    | 0.808571429 | 0.3189   | 1.218  |
| 98501_at   | 46.3   | 27.5   | 23.9   | 26.7   | 17.6   | 50     | 14.6   | 20.6   | 0.600216697 | 31.1     | 25.7     | 5.4      | 1.210116732 | 0.402    | -1.322 |
| 98502_at   | 401.1  | 443.9  | 410.7  | 425.5  | 355.1  | 520.3  | 455.4  | 405.6  | 0.727615156 | 420.3    | 434.1    | 13.8     | 0.96821009  | 0.7934   | 1.023  |
| 98503_at   | 830    | 779.9  | 804.9  | 1022.1 | 871.9  | 795.2  | 881.7  | 902.3  | 0.955626751 | 859.225  | 862.775  | 3.55     | 0.99588537  | 0.9001   | 1.009  |
| 98504_at   | 354.6  | 253.1  | 437.8  | 534.6  | 300.4  | 258.6  | 639.6  | 559.1  | 0.706935513 | 395.025  | 439.425  | 44.4     | 0.898958867 | 0.808    | 1.072  |
| 98505_i_at | 244.9  | 176.3  | 221.2  | 177.5  | 173.9  | 195.3  | 180.5  | 194.6  | 0.352878861 | 204.975  | 186.075  | 18.9     | 1.101571947 | 0.3499   | -1.092 |
| 98506_r_at | 63.4   | 53.6   | 108.9  | 101.7  | 88.4   | 73.7   | 89.1   | 83.8   | 0.903595718 | 81.9     | 83.75    | 1.85     | 0.977910448 | 0.7323   | 1.067  |
| 98507_at   | 121.1  | 143.5  | 123.2  | 143    | 136.5  | 184.4  | 89.7   | 114.9  | 0.953088201 | 132.7    | 131.375  | 1.325    | 1.010085633 | 0.8044   | -1.042 |
| 98508_s_at | 574.8  | 730.1  | 802.9  | 556.4  | 635.6  | 689.7  | 689    | 618.4  | 0.906863932 | 666.05   | 658.175  | 7.875    | 1.011964903 | 0.9926   | 1.001  |
| 98509_at   | 1038.5 | 923.6  | 1386   | 1434.3 | 1250.7 | 906.1  | 1234.7 | 1306.2 | 0.896676065 | 1195.6   | 1174.425 | 21.175   | 1.0180301   | 0.9407   | 1.011  |
| 98511_at   | 831.3  | 804.5  | 665.8  | 675.5  | 756    | 675.1  | 565.3  | 817    | 0.577516224 | 744.275  | 703.35   | 40.925   | 1.058185825 | 0.5592   | -1.063 |
| 98512_at   | 691.1  | 556.1  | 473.8  | 512.4  | 509.8  | 471.7  | 471.2  | 413.8  | 0.148015617 | 558.35   | 466.625  | 91.725   | 1.196571122 | 0.1109   | -1.188 |
| 98513_at   | 698.6  | 620.9  | 525.6  | 478.1  | 812.8  | 946.5  | 559.7  | 793.3  | 0.090809797 | 580.8    | 778.075  | 197.275  | 0.746457604 | 0.08679  | 1.331  |
| 98514_at   | 504.9  | 690.1  | 553.8  | 531.7  | 800.5  | 636.1  | 747.9  | 692    | 0.034483084 | 570.125  | 719.125  | 149      | 0.792803755 | 0.03187  | 1.266  |
| 98515_at   | 1397.8 | 1603.1 | 1640.7 | 1355.3 | 1612.3 | 1413.8 | 1569.3 | 1307.2 | 0.822517077 | 1499.225 | 1475.65  | 23.575   | 1.015976011 | 0.8234   | 1.016  |
| 98516_at   | 2305.4 | 1846.9 | 2037   | 1715.7 | 1785.9 | 2091.4 | 1647.3 | 1741.9 | 0.35993653  | 1976.25  | 1816.625 | 159.625  | 1.087868988 | 0.355    | -1.086 |
| 98518_f_at | 4.5    | 5.6    | 2.8    | 23     | 10     | 6.2    | 6      | 2.6    | 0.607797074 | 8.975    | 6.2      | 2.775    | 1.447580645 | 0.8149   | -1.14  |
| 98519_r_at | 45.1   | 52.5   | 28.9   | 28.3   | 19.4   | 56.1   | 29.5   | 35.8   | 0.73418944  | 38.7     | 35.2     | 3.5      | 1.099431818 | 0.6474   | -1.139 |
| 98521_at   | 274.7  | 351.6  | 635.4  | 602.7  | 404.4  | 489.8  | 556.6  | 665.6  | 0.576515608 | 466.1    | 529.1    | 63       | 0.880929881 | 0.4859   | 1.187  |
| 98522_at   | 1834.4 | 1939   | 1314.4 | 1241.9 | 1967   | 1688.1 | 1475.4 | 1540.2 | 0.699600438 | 1582.425 | 1667.675 | 85.25    | 0.948880927 | 0.6328   | 1.068  |
| 98523_at   | 194.6  | 144.4  | 124.6  | 180.8  | 132.5  | 154.3  | 148.1  | 147.2  | 0.412866513 | 161.1    | 145.525  | 15.575   | 1.107026284 | 0.4456   | -1.092 |
| 98524_f_at | 292.3  | 296.3  | 285.5  | 380.7  | 456.9  | 414.6  | 327.8  | 519.3  | 0.056253347 | 313.7    | 429.65   | 115.95   | 0.730129175 | 0.04049  | 1.361  |
| 98525_f_at | 3321.3 | 3757.6 | 2862.2 | 4494.4 | 6443.1 | 5291.9 | 3485.4 | 4072.6 | 0.169329555 | 3608.875 | 4823.25  | 1214.375 | 0.748224745 | 0.1489   | 1.318  |
| 98526_r_at | 237    | 255.1  | 207.5  | 274.1  | 215.3  | 373.6  | 248.8  | 286.7  | 0.365303688 | 243.425  | 281.1    | 37.675   | 0.865972963 | 0.3681   | 1.137  |
| 98527_at   | 1046.8 | 974.1  | 781.7  | 757.1  | 886.8  | 940.4  | 775.1  | 738.3  | 0.549025153 | 889.925  | 835.15   | 54.775   | 1.06558702  | 0.5714   | -1.06  |
| 98528_at   | 1802.9 | 1841.4 | 1485   | 1227.6 | 1873.1 | 1685.6 | 1245.5 | 1334.6 | 0.800611204 | 1589.225 | 1534.7   | 54.525   | 1.035528116 | 0.8006   | -1.036 |



|            |         |         |         |         |         |         |         |         |             |          |           |         |             |          |        |
|------------|---------|---------|---------|---------|---------|---------|---------|---------|-------------|----------|-----------|---------|-------------|----------|--------|
| 98529_at   | 39.9    | 15.1    | 21.4    | 14.8    | 12.8    | 5.7     | 3.2     | 6.8     | 0.070896253 | 22.8     | 7.125     | 15.675  | 3.2         | 0.01727  | -3.336 |
| 98530_at   | 281.4   | 400     | 325.3   | 278.1   | 394.9   | 369.2   | 372.6   | 452.1   | 0.07451919  | 321.2    | 397.2     | 76      | 0.808660624 | 0.0632   | 1.246  |
| 98531_g_at | 8119.6  | 10074.1 | 7069.2  | 7822.3  | 8881.1  | 7358.1  | 7346.5  | 8201.6  | 0.679900279 | 8271.3   | 7946.825  | 324.475 | 1.040830772 | 0.7058   | -1.035 |
| 98532_at   | 3839.3  | 3277.7  | 3268    | 2746.8  | 2909.4  | 3237.7  | 2792.1  | 2673.9  | 0.19967999  | 3282.95  | 2903.275  | 379.675 | 1.130774729 | 0.1878   | -1.126 |
| 98533_at   | 2095.9  | 2819.7  | 2208    | 1895.1  | 3116.4  | 2521.4  | 2395.4  | 2319.6  | 0.261810146 | 2254.675 | 2588.2    | 333.525 | 0.871136311 | 0.2339   | 1.153  |
| 98534_at   | 116     | 104.2   | 101.8   | 137     | 98.3    | 112.4   | 153     | 119.4   | 0.686178277 | 114.75   | 120.775   | 6.025   | 0.950113848 | 0.7073   | 1.046  |
| 98535_at   | 744.2   | 962.9   | 717     | 633.4   | 786.1   | 685     | 653.7   | 568.6   | 0.323819429 | 764.375  | 673.35    | 91.025  | 1.135182297 | 0.3132   | -1.129 |
| 98538_at   | 446.3   | 446.9   | 478.2   | 556.1   | 504.8   | 437.5   | 479.2   | 573.2   | 0.677448971 | 481.875  | 498.675   | 16.8    | 0.966310723 | 0.677    | 1.034  |
| 98539_at   | 289.1   | 256     | 462.7   | 316.3   | 319.2   | 287.7   | 415.1   | 303.5   | 0.995062201 | 331.025  | 331.375   | 0.35    | 0.998943795 | 0.9167   | 1.017  |
| 98540_g_at | 821.4   | 1002.1  | 1177.1  | 1100.7  | 1099.4  | 1092.1  | 1331    | 1250.4  | 0.136497556 | 1025.325 | 1193.225  | 167.9   | 0.859288902 | 0.1397   | 1.17   |
| 98543_at   | 578.6   | 655.4   | 657.2   | 520     | 779.2   | 753.9   | 841.3   | 615.3   | 0.052036612 | 602.8    | 747.425   | 144.625 | 0.806502325 | 0.05025  | 1.238  |
| 98544_at   | 870.3   | 823.7   | 609.5   | 651.2   | 768.7   | 945.8   | 725.8   | 791.6   | 0.421121    | 738.675  | 807.975   | 69.3    | 0.914230019 | 0.3923   | 1.101  |
| 98545_at   | 2017    | 2197.9  | 2242.5  | 2114.9  | 2134.3  | 1605.7  | 1834.4  | 1786    | 0.063006598 | 2143.075 | 1840.1    | 302.975 | 1.164651378 | 0.04762  | -1.17  |
| 98547_at   | 1038.3  | 1211.7  | 844.9   | 579.6   | 894.5   | 602.4   | 799.4   | 871.8   | 0.445199325 | 918.625  | 792.025   | 126.6   | 1.159843439 | 0.5249   | -1.132 |
| 98549_at   | 127.1   | 135.6   | 69.9    | 81.1    | 99.3    | 144.6   | 102.6   | 108     | 0.621817067 | 103.425  | 113.625   | 10.2    | 0.910231023 | 0.5344   | 1.13   |
| 98550_at   | 1877.9  | 2143    | 2055.8  | 2259.4  | 2239.5  | 2002    | 2174.3  | 2073.5  | 0.70612936  | 2084.025 | 2122.325  | 38.3    | 0.981953754 | 0.6876   | 1.02   |
| 98552_at   | 482.7   | 550.9   | 444.5   | 414.2   | 531.9   | 669.2   | 408.8   | 353.5   | 0.826743499 | 473.075  | 490.85    | 17.775  | 0.963787308 | 0.9388   | 1.012  |
| 98553_at   | 3594.2  | 3769.8  | 3749.4  | 3374    | 2757.2  | 2147.8  | 2577.9  | 2405.7  | 0.000567213 | 3621.85  | 2472.15   | 1149.7  | 1.465060777 | 0.000625 | -1.47  |
| 98554_at   | 253.2   | 239.1   | 370.6   | 331.6   | 269.7   | 249.6   | 411.1   | 379.7   | 0.591330933 | 298.625  | 327.525   | 28.9    | 0.911762461 | 0.6149   | 1.09   |
| 98555_at   | 2411.2  | 2509.4  | 2136.3  | 2476.1  | 3103.9  | 2677.9  | 2289    | 2501.2  | 0.243309127 | 2383.25  | 2643      | 259.75  | 0.901721529 | 0.2289   | 1.104  |
| 98556_at   | 86.3    | 60.8    | 37.5    | 52.3    | 17.5    | 71.7    | 48.3    | 29.1    | 0.305559335 | 59.225   | 41.65     | 17.575  | 1.421968788 | 0.2568   | -1.553 |
| 98557_f_at | 5856.5  | 6260.3  | 5051.6  | 5951.8  | 6126.5  | 5369.5  | 5779.8  | 5777    | 0.957500345 | 5780.05  | 5763.2    | 16.85   | 1.002923723 | 0.987    | 1.001  |
| 98558_r_at | 3.2     | 1.7     | 1.3     | 3.6     | 3.5     | 2.7     | 1.8     | 15.5    | 0.368573128 | 2.45     | 5.875     | 3.425   | 0.417021277 | 0.3195   | 1.785  |
| 98559_at   | 55.8    | 34.7    | 182.6   | 64.1    | 27.9    | 36.7    | 97.9    | 48.3    | 0.436502605 | 84.3     | 52.7      | 31.6    | 1.599620493 | 0.4156   | -1.471 |
| 98560_at   | 740.7   | 563.6   | 690.6   | 767.9   | 509.5   | 613.9   | 496.5   | 507.6   | 0.030586156 | 690.7    | 531.875   | 158.825 | 1.298613396 | 0.02284  | -1.295 |
| 98561_at   | 1696.3  | 1584.1  | 1074.6  | 1072.1  | 1807.5  | 1823.2  | 1665.3  | 1557.2  | 0.116653562 | 1356.775 | 1713.3    | 356.525 | 0.79190743  | 0.09567  | 1.289  |
| 98562_at   | 415.6   | 748.6   | 558.9   | 459.5   | 469.4   | 608.6   | 652.8   | 478.4   | 0.942169434 | 545.65   | 552.3     | 6.65    | 0.987959442 | 0.8638   | 1.028  |
| 98563_f_at | 880     | 890.5   | 769.1   | 747.6   | 833     | 851.5   | 689.7   | 884.7   | 0.904894705 | 821.8    | 814.725   | 7.075   | 1.008683912 | 0.8921   | 1.01   |
| 98564_f_at | 15884.2 | 18344.3 | 11390.7 | 12843.4 | 13979.7 | 13164.8 | 14718.7 | 16114.5 | 0.945898257 | 14615.65 | 14494.425 | 121.225 | 1.00836356  | 0.9606   | 1.006  |
| 98565_at   | 13.1    | 1.9     | 1.8     | 11.8    | 0.9     | 7.7     | 9.5     | 7.4     | 0.838217404 | 7.15     | 6.375     | 0.775   | 1.121568627 | 0.9825   | -1.018 |
| 98568_at   | 7.7     | 5.3     | 5.8     | 8       | 5.8     | 31.5    | 6.4     | 7.6     | 0.399353497 | 6.7      | 12.825    | 6.125   | 0.522417154 | 0.3795   | 1.473  |
| 98569_at   | 394.3   | 470.4   | 473.8   | 545.6   | 342.4   | 477.5   | 458.5   | 467.9   | 0.465541156 | 471.025  | 436.575   | 34.45   | 1.078909695 | 0.4766   | -1.081 |
| 98570_at   | 53      | 6.3     | 6.1     | 5.6     | 15.6    | 50.6    | 6.2     | 12.3    | 0.831879794 | 17.75    | 21.175    | 3.425   | 0.838252656 | 0.5731   | 1.518  |
| 98571_s_at | 7910.4  | 11153.4 | 7846.8  | 8372.3  | 10805.9 | 9414.5  | 8264.7  | 9681.9  | 0.47794256  | 8820.725 | 9541.75   | 721.025 | 0.924434721 | 0.427    | 1.089  |
| 98572_at   | 276     | 379.9   | 404.6   | 547.2   | 495.3   | 321     | 579.6   | 646     | 0.274324116 | 401.925  | 510.475   | 108.55  | 0.787354915 | 0.3011   | 1.265  |
| 98573_r_at | 2711.2  | 3758.1  | 3663    | 3382.6  | 3754.3  | 2632.4  | 3383    | 2983.1  | 0.594563969 | 3378.725 | 3188.2    | 190.525 | 1.059759425 | 0.6012   | -1.061 |
| 98574_at   | 1781.3  | 1598.6  | 1998.9  | 1806.4  | 1720.5  | 1467    | 1860.9  | 2089.1  | 0.941188028 | 1796.3   | 1784.375  | 11.925  | 1.006683012 | 0.8976   | -1.012 |
| 98575_at   | 1124.7  | 1024.7  | 1470.6  | 2045.7  | 1313    | 1157.5  | 1333.3  | 1732.3  | 0.906492049 | 1416.425 | 1384.025  | 32.4    | 1.023409982 | 0.9867   | 1.003  |
| 98577_f_at | 97.9    | 89.8    | 67.6    | 100.6   | 108     | 109.4   | 109.1   | 152.7   | 0.065077105 | 88.975   | 119.8     | 30.825  | 0.74269616  | 0.05355  | 1.347  |
| 98578_at   | 12.5    | 12.9    | 9.5     | 10.6    | 4.5     | 7.1     | 10.6    | 7.7     | 0.04594731  | 11.375   | 7.475     | 3.9     | 1.52173913  | 0.05316  | -1.579 |
| 98579_at   | 363.3   | 288.7   | 623.7   | 702.4   | 360.3   | 415.3   | 428.2   | 345.4   | 0.364287608 | 494.525  | 387.3     | 107.225 | 1.276852569 | 0.4373   | -1.2   |
| 98580_at   | 772.2   | 817.1   | 804.3   | 863.6   | 722.1   | 836.1   | 792     | 599.5   | 0.238280293 | 814.3    | 737.425   | 76.875  | 1.10424789  | 0.2151   | -1.112 |
| 98582_at   | 18.8    | 10.3    | 7.4     | 8.9     | 8.4     | 8.5     | 6.8     | 8.4     | 0.284717627 | 11.35    | 8.025     | 3.325   | 1.414330218 | 0.2301   | -1.322 |
| 98583_at   | 10.9    | 7.3     | 8.2     | 6.7     | 7.3     | 14      | 21      | 2.4     | 0.530737156 | 8.275    | 11.175    | 2.9     | 0.74049217  | 0.9457   | 1.035  |
| 98586_at   | 433.1   | 477.8   | 669.6   | 666.7   | 592.8   | 509.6   | 666.5   | 578.3   | 0.736815943 | 561.8    | 586.8     | 25      | 0.957396046 | 0.661    | 1.06   |
| 98587_at   | 1478.3  | 1674    | 1754.5  | 1747.3  | 1692.6  | 1940.5  | 1929.7  | 1778.5  | 0.099463452 | 1663.525 | 1835.325  | 171.8   | 0.906392601 | 0.1053   | 1.104  |
| 98588_at   | 691.2   | 584.9   | 579.4   | 499.7   | 617.8   | 753.3   | 579.9   | 468.7   | 0.828098539 | 588.8    | 604.925   | 16.125  | 0.973343803 | 0.875    | 1.02   |
| 98589_at   | 714.2   | 1148.5  | 897.5   | 605.1   | 984.7   | 1114    | 894.5   | 770.7   | 0.506310641 | 841.325  | 940.975   | 99.65   | 0.894099206 | 0.4388   | 1.141  |
| 98590_at   | 576.5   | 686.6   | 450     | 607.3   | 691.9   | 856.9   | 632.6   | 655.7   | 0.117218265 | 580.1    | 709.275   | 129.175 | 0.81787741  | 0.1159   | 1.228  |
| 98593_at   | 1599.9  | 1433.3  | 1570.9  | 1421.1  | 1256.1  | 1333.9  | 1349.1  | 1271.6  | 0.013954328 | 1506.3   | 1302.675  | 203.625 | 1.156312971 | 0.00644  | -1.155 |
| 98594_at   | 691.8   | 653.4   | 1030.3  | 974.5   | 738.7   | 694.7   | 967.8   | 949.9   | 0.99824223  | 837.5    | 837.775   | 0.275   | 0.99967175  | 0.9488   | 1.01   |
| 98595_at   | 478.1   | 441.2   | 635.6   | 718.3   | 433.3   | 457     | 609.1   | 645.6   | 0.717701597 | 568.3    | 536.25    | 32.05   | 1.0597669   | 0.7405   | -1.054 |
| 98596_s_at | 1207.5  | 995.6   | 1161.1  | 999.7   | 1187.2  | 1114.4  | 1012.2  | 1114.1  | 0.816329453 | 1090.975 | 1106.975  | 16      | 0.985546196 | 0.79     | 1.017  |
| 98597_at   | 187.3   | 246.3   | 161     | 108.7   | 207.5   | 171.8   | 158.1   | 167.1   | 0.992664401 | 175.825  | 176.125   | 0.3     | 0.998296664 | 0.8385   | 1.039  |
| 98598_at   | 54.2    | 8.7     | 4.9     | 16.4    | 25.6    | 38.4    | 25.7    | 9.7     | 0.778771838 | 21.05    | 24.85     | 3.8     | 0.847082495 | 0.4636   | 1.588  |
| 98599_at   | 333.8   | 308.2   | 345.6   | 396.7   | 301.7   | 340.4   | 321.2   | 405     | 0.895390958 | 346.075  | 342.075   | 4       | 1.011693342 | 0.8737   | -1.014 |



|            |         |         |         |        |         |         |         |        |             |           |           |         |             |          |        |
|------------|---------|---------|---------|--------|---------|---------|---------|--------|-------------|-----------|-----------|---------|-------------|----------|--------|
| 98600_at   | 7044.5  | 7226.9  | 6272.6  | 5892.7 | 7617.5  | 6075.9  | 7567.4  | 6500.7 | 0.532595061 | 6609.175  | 6940.375  | 331.2   | 0.952279236 | 0.5442   | 1.049  |
| 98602_at   | 709     | 428.9   | 838     | 684.6  | 465.2   | 511.6   | 707.9   | 620.3  | 0.420865897 | 665.125   | 576.25    | 88.875  | 1.154229935 | 0.4844   | -1.137 |
| 98603_s_at | 280.8   | 269.3   | 437.7   | 433.7  | 221.9   | 288.6   | 399.3   | 351.1  | 0.531194256 | 355.375   | 315.225   | 40.15   | 1.127369339 | 0.5487   | -1.124 |
| 98604_at   | 1289.5  | 1268.2  | 1151.5  | 927.6  | 1103.7  | 1108.1  | 1051.7  | 919.3  | 0.28564488  | 1159.2    | 1045.7    | 113.5   | 1.108539734 | 0.307    | -1.102 |
| 98605_at   | 530.6   | 472     | 555.5   | 475.2  | 459     | 768.4   | 390.3   | 599.9  | 0.626058782 | 508.325   | 554.4     | 46.075  | 0.916892136 | 0.7312   | 1.057  |
| 98606_s_at | 554.6   | 392.9   | 842.7   | 478.6  | 283.7   | 358     | 409.4   | 462.3  | 0.147740905 | 567.2     | 378.35    | 188.85  | 1.499141007 | 0.09602  | -1.462 |
| 98608_at   | 1363.3  | 1368.4  | 1342.7  | 1461.9 | 1257.3  | 1220.7  | 1106.8  | 1203   | 0.004505214 | 1384.075  | 1196.95   | 187.125 | 1.156334851 | 0.004607 | -1.157 |
| 98609_at   | 1853.5  | 1637.3  | 1834.6  | 1693.1 | 1264    | 1415.5  | 1244.6  | 1434.9 | 0.001265014 | 1754.625  | 1339.75   | 414.875 | 1.309665982 | 0.001331 | -1.311 |
| 98610_at   | 636.7   | 766.2   | 591.3   | 443.7  | 701.3   | 640.3   | 473.3   | 494.7  | 0.724368685 | 609.475   | 577.4     | 32.075  | 1.055550745 | 0.752    | -1.05  |
| 98612_at   | 4.6     | 7.9     | 3.9     | 2.5    | 3.6     | 6       | 4.7     | 4.5    | 0.9849494   | 4.725     | 4.7       | 0.025   | 1.005319149 | 0.803    | 1.071  |
| 98613_at   | 962     | 1003.5  | 1090.7  | 909.5  | 1040.3  | 1158.6  | 1082.6  | 1004.9 | 0.165057092 | 991.425   | 1071.6    | 80.175  | 0.925181971 | 0.1596   | 1.082  |
| 98614_at   | 441.3   | 416.5   | 322.2   | 368.4  | 395.8   | 471.8   | 401.6   | 398.9  | 0.391687169 | 387.1     | 417.025   | 29.925  | 0.928241712 | 0.371    | 1.082  |
| 98615_at   | 1396.7  | 1612.2  | 1651.4  | 1777.8 | 1579.6  | 1472.1  | 1965.3  | 1778.1 | 0.534971364 | 1609.525  | 1698.775  | 89.25   | 0.947462142 | 0.55     | 1.053  |
| 98616_f_at | 458.6   | 551.7   | 393.2   | 353.4  | 495.9   | 440.8   | 375     | 500.2  | 0.802557778 | 439.225   | 452.975   | 13.75   | 0.969645124 | 0.7555   | 1.039  |
| 98617_at   | 1205.7  | 1194.7  | 1706.5  | 1480.2 | 1126.1  | 1026.3  | 1019.8  | 1223   | 0.088029436 | 1396.775  | 1098.8    | 297.975 | 1.271182199 | 0.05307  | -1.26  |
| 98618_at   | 810.8   | 888.4   | 539.2   | 589.2  | 727.1   | 656.3   | 537     | 555.5  | 0.40361358  | 706.9     | 618.975   | 87.925  | 1.142049356 | 0.4302   | -1.126 |
| 98619_at   | 793.5   | 880.2   | 773     | 803.2  | 848.8   | 805.4   | 707.8   | 770.9  | 0.470930915 | 812.475   | 783.225   | 29.25   | 1.03734559  | 0.4596   | -1.038 |
| 98621_at   | 45.1    | 41      | 52.7    | 73.4   | 53.8    | 79.7    | 76.2    | 69.1   | 0.123116885 | 53.05     | 69.7      | 16.65   | 0.761119082 | 0.1129   | 1.334  |
| 98622_at   | 10.4    | 43.1    | 7.6     | 8.5    | 14.1    | 12.5    | 7.7     | 6.1    | 0.462412807 | 17.4      | 10.1      | 7.3     | 1.722772277 | 0.5133   | -1.367 |
| 98623_g_at | 6351.2  | 7456.6  | 7043.3  | 6667.9 | 6797.1  | 6905.4  | 7219.6  | 7154.1 | 0.618916003 | 6879.75   | 7019.05   | 139.3   | 0.980154009 | 0.5863   | 1.022  |
| 98624_at   | 497.4   | 400.4   | 737.4   | 703.8  | 600.2   | 670.5   | 421.2   | 443.4  | 0.634349835 | 584.75    | 533.825   | 50.925  | 1.095396431 | 0.6809   | -1.083 |
| 98625_s_at | 7136.5  | 7460.1  | 6504    | 5798.8 | 5716.1  | 5303.2  | 5379.9  | 5251.8 | 0.032745079 | 6724.85   | 5412.75   | 1312.1  | 1.242409127 | 0.01111  | -1.237 |
| 98626_at   | 2266.7  | 2501.4  | 1526.4  | 1366.7 | 2009.3  | 1792.7  | 1383.9  | 1555.1 | 0.49412826  | 1915.3    | 1685.25   | 230.05  | 1.136507937 | 0.5536   | -1.111 |
| 98627_at   | 389.7   | 849.8   | 571.3   | 520.9  | 527.6   | 1087.6  | 825.5   | 792.3  | 0.185000753 | 582.925   | 808.25    | 225.325 | 0.721218682 | 0.1784   | 1.397  |
| 98628_f_at | 5031.1  | 5171.5  | 5689    | 5727   | 6235.6  | 5306.5  | 5977.9  | 5822.2 | 0.154781046 | 5404.65   | 5835.55   | 430.9   | 0.926159488 | 0.1579   | 1.08   |
| 98629_f_at | 5326.3  | 4999    | 5732.7  | 5831.4 | 6462.9  | 5512.4  | 6294    | 6355.1 | 0.057099837 | 5472.35   | 6156.1    | 683.75  | 0.888931304 | 0.06045  | 1.125  |
| 98630_at   | 543.4   | 321.8   | 443.7   | 431.2  | 318.4   | 595.8   | 551.5   | 472    | 0.541588923 | 435.025   | 484.425   | 49.4    | 0.89802343  | 0.601    | 1.102  |
| 98631_g_at | 843.3   | 627.6   | 840.9   | 667.9  | 626.4   | 866.9   | 795.6   | 661.9  | 0.930962831 | 744.925   | 737.7     | 7.225   | 1.009793954 | 0.9315   | 1.01   |
| 98632_at   | 517.1   | 361.3   | 314.6   | 214    | 296.1   | 452.5   | 280.7   | 258.7  | 0.714164193 | 351.75    | 322       | 29.75   | 1.092391304 | 0.7813   | -1.066 |
| 98633_at   | 1242.7  | 1159.1  | 1244.5  | 1003.7 | 1322.6  | 1254.4  | 1164.5  | 1314   | 0.190813309 | 1162.5    | 1263.875  | 101.375 | 0.919790327 | 0.1912   | 1.09   |
| 98635_at   | 644.3   | 752.3   | 752     | 778.8  | 733.6   | 632.4   | 787.2   | 873    | 0.691063531 | 731.85    | 756.55    | 24.7    | 0.967351794 | 0.7291   | 1.029  |
| 98726_at   | 48.4    | 39.3    | 28.4    | 36.2   | 24.3    | 46.6    | 10.9    | 32.8   | 0.324168568 | 38.075    | 28.65     | 9.425   | 1.328970332 | 0.2769   | -1.482 |
| 98727_at   | 64.6    | 45.6    | 13.9    | 17     | 56.3    | 60.5    | 17.3    | 22.1   | 0.826891274 | 35.275    | 39.05     | 3.775   | 0.903329065 | 0.7594   | 1.171  |
| 98728_at   | 65.5    | 58.6    | 14.1    | 54.4   | 38.1    | 101.3   | 40.1    | 65.9   | 0.509186281 | 48.15     | 61.35     | 13.2    | 0.784841076 | 0.496    | 1.364  |
| 98729_at   | 17.3    | 14.7    | 35.2    | 47.4   | 9       | 17.9    | 16.5    | 20.2   | 0.198948323 | 28.65     | 15.9      | 12.75   | 1.801886792 | 0.1724   | -1.675 |
| 98730_at   | 11.3    | 13.9    | 16      | 27.1   | 21.6    | 18.6    | 36.9    | 8.4    | 0.558187018 | 17.075    | 21.375    | 4.3     | 0.798830409 | 0.6863   | 1.164  |
| 98731_at   | 172     | 119     | 154.5   | 131.4  | 93.8    | 153.2   | 163.3   | 124.7  | 0.61351687  | 144.225   | 133.75    | 10.475  | 1.078317757 | 0.578    | -1.092 |
| 98732_at   | 18.1    | 15.6    | 29.8    | 50.2   | 43.4    | 23.8    | 47.4    | 23     | 0.578903734 | 28.425    | 34.4      | 5.975   | 0.82630814  | 0.4826   | 1.277  |
| 98756_at   | 79.3    | 49.8    | 74      | 103.3  | 64.7    | 90.2    | 80.1    | 106.9  | 0.553361207 | 76.6      | 85.475    | 8.875   | 0.89616847  | 0.5202   | 1.134  |
| 98758_at   | 13.7    | 13.8    | 24.3    | 9.7    | 21.8    | 30.3    | 31      | 9.9    | 0.233471175 | 15.375    | 23.25     | 7.875   | 0.661290323 | 0.2888   | 1.464  |
| 98759_f_at | 17914.7 | 20431.7 | 12806.7 | 13760  | 14441.8 | 14716.6 | 15083.5 | 13783  | 0.408196983 | 16228.275 | 14506.225 | 1722.05 | 1.118711105 | 0.4286   | -1.099 |
| 98760_at   | 15      | 4.4     | 3.8     | 8.9    | 4.2     | 14.6    | 9.1     | 11.8   | 0.597636967 | 8.025     | 9.925     | 1.9     | 0.808564232 | 0.5378   | 1.314  |
| 98761_i_at | 1565.2  | 1580.4  | 1359.4  | 1290.8 | 1762.9  | 1612.6  | 1422.3  | 1327.9 | 0.524673628 | 1448.95   | 1531.425  | 82.475  | 0.94614493  | 0.5367   | 1.055  |
| 98762_f_at | 281.5   | 209.6   | 196.8   | 258.4  | 291.6   | 271.1   | 208.6   | 202.3  | 0.827638868 | 236.575   | 243.4     | 6.825   | 0.971959737 | 0.8393   | 1.027  |
| 98763_at   | 3.5     | 7.7     | 5.7     | 1.8    | 1.5     | 4.4     | 2.6     | 6.8    | 0.640924069 | 4.675     | 3.825     | 0.85    | 1.222222222 | 0.6447   | -1.246 |
| 98764_at   | 2.2     | 12.3    | 5.1     | 6.6    | 0.4     | 8.6     | 7.7     | 2.9    | 0.588266949 | 6.55      | 4.9       | 1.65    | 1.336734694 | 0.4777   | -1.8   |
| 98765_f_at | 296.4   | 309.5   | 203.9   | 215.9  | 193.9   | 353     | 261.7   | 271.4  | 0.76001742  | 256.425   | 270       | 13.575  | 0.949722222 | 0.7854   | 1.047  |
| 98766_at   | 253.5   | 186.1   | 335.1   | 357.8  | 115.5   | 194.9   | 245.4   | 244.4  | 0.149396731 | 283.125   | 200.05    | 83.075  | 1.415271182 | 0.1731   | -1.431 |
| 98767_at   | 325.8   | 397.4   | 340.6   | 474.5  | 357.1   | 293.5   | 342.8   | 471.8  | 0.730425873 | 384.575   | 366.3     | 18.275  | 1.0498908   | 0.7002   | -1.054 |
| 98768_at   | 62.9    | 57.2    | 30      | 47.6   | 38.5    | 51      | 40.7    | 46.3   | 0.531816211 | 49.425    | 44.125    | 5.3     | 1.120113314 | 0.6563   | -1.086 |
| 98770_at   | 465.8   | 431.2   | 465.6   | 339.9  | 499.5   | 576.9   | 398.8   | 442.7  | 0.31286714  | 425.625   | 479.475   | 53.85   | 0.887689661 | 0.322    | 1.125  |
| 98771_at   | 175.9   | 114.7   | 150.9   | 154.7  | 108.1   | 157.2   | 165.1   | 137.6  | 0.708178408 | 149.05    | 142       | 7.05    | 1.049647887 | 0.7176   | -1.051 |
| 98772_at   | 49.6    | 41.9    | 5.2     | 29.2   | 27.7    | 52.2    | 43.7    | 21.4   | 0.706359275 | 31.475    | 36.25     | 4.775   | 0.868275862 | 0.5372   | 1.441  |
| 98773_s_at | 22.3    | 49.4    | 24.1    | 21.1   | 15.5    | 37.8    | 34.9    | 31.4   | 0.938700826 | 29.225    | 29.9      | 0.675   | 0.977424749 | 0.9083   | 1.035  |
| 98774_at   | 33.9    | 4.7     | 4.4     | 4.4    | 3.2     | 25.3    | 13.9    | 5.7    | 0.984998484 | 11.85     | 12.025    | 0.175   | 0.985446985 | 0.7907   | 1.209  |
| 98775_at   | 314.9   | 234.6   | 330.8   | 254.7  | 177.7   | 258.6   | 343.3   | 254.6  | 0.564254743 | 283.75    | 258.55    | 25.2    | 1.097466641 | 0.5144   | -1.116 |



|            |       |       |       |       |       |       |       |       |             |         |         |         |             |         |        |
|------------|-------|-------|-------|-------|-------|-------|-------|-------|-------------|---------|---------|---------|-------------|---------|--------|
| 98776_at   | 22.3  | 18.5  | 2.5   | 5.5   | 18.6  | 13.7  | 2.8   | 3.9   | 0.705828797 | 12.2    | 9.75    | 2.45    | 1.251282051 | 0.8081  | -1.193 |
| 98777_at   | 131.3 | 72.2  | 20.7  | 68.4  | 40.6  | 29.7  | 65.5  | 30.5  | 0.264366919 | 73.15   | 41.575  | 31.575  | 1.759470836 | 0.3556  | -1.536 |
| 98778_at   | 318.7 | 238.6 | 271.8 | 333.6 | 228.4 | 317.4 | 286.3 | 270.6 | 0.619137252 | 290.675 | 275.675 | 15      | 1.054411898 | 0.6368  | -1.053 |
| 98779_at   | 77.1  | 12.3  | 20.7  | 13.8  | 16    | 27.9  | 17.9  | 25.1  | 0.59568677  | 30.975  | 21.725  | 9.25    | 1.425776755 | 0.87    | -1.078 |
| 98780_at   | 62.1  | 37.4  | 53.9  | 69.9  | 60.9  | 65    | 69    | 40.5  | 0.758836943 | 55.825  | 58.85   | 3.025   | 0.948598131 | 0.7574  | 1.06   |
| 98781_at   | 8.2   | 1.5   | 2.1   | 4.9   | 2.2   | 7.9   | 2     | 2.9   | 0.844437441 | 4.175   | 3.75    | 0.425   | 1.113333333 | 0.9589  | -1.027 |
| 98782_at   | 121.3 | 110.2 | 124.7 | 151.1 | 96    | 214   | 132.8 | 123.8 | 0.611870242 | 126.825 | 141.65  | 14.825  | 0.895340628 | 0.6959  | 1.077  |
| 98783_at   | 365.5 | 714.1 | 584.9 | 933   | 615.7 | 483.7 | 249.5 | 604.5 | 0.316801651 | 649.375 | 488.35  | 161.025 | 1.329732774 | 0.3574  | -1.334 |
| 98784_at   | 678   | 506.6 | 459.6 | 582.6 | 536.3 | 930.6 | 622.8 | 543.8 | 0.379578083 | 556.7   | 658.375 | 101.675 | 0.845566736 | 0.3615  | 1.164  |
| 98785_at   | 8.7   | 5.9   | 1.8   | 7.9   | 5.8   | 10.3  | 6.6   | 9.7   | 0.332066609 | 6.075   | 8.1     | 2.025   | 0.75        | 0.3239  | 1.519  |
| 98786_at   | 29.6  | 20.6  | 19.1  | 23.5  | 19.7  | 32.4  | 19.4  | 19.3  | 0.904556237 | 23.2    | 22.7    | 0.5     | 1.022026432 | 0.8322  | -1.036 |
| 98787_at   | 54.1  | 61.1  | 33.4  | 34.9  | 33.7  | 59.7  | 45.3  | 40.6  | 0.909562927 | 45.875  | 44.825  | 1.05    | 1.023424428 | 0.9561  | 1.011  |
| 98788_at   | 19    | 17.1  | 15    | 9.1   | 10.2  | 3     | 4.8   | 3.1   | 0.012770406 | 15.05   | 5.275   | 9.775   | 2.853080569 | 0.01296 | -3.145 |
| 98789_at   | 143.3 | 94.9  | 80    | 75.6  | 65.9  | 81.3  | 62.3  | 101.1 | 0.298948119 | 98.45   | 77.65   | 20.8    | 1.267868641 | 0.2662  | -1.25  |
| 98790_s_at | 134.9 | 167.6 | 230.4 | 253.8 | 168.2 | 181.2 | 209   | 217.8 | 0.934083199 | 196.675 | 194.05  | 2.625   | 1.013527441 | 0.9411  | 1.012  |
| 98791_at   | 22.1  | 14.5  | 11.7  | 46.7  | 12.3  | 27.5  | 23.1  | 23.3  | 0.810705155 | 23.75   | 21.55   | 2.2     | 1.102088167 | 0.9747  | 1.012  |
| 98792_at   | 29.5  | 10.2  | 9.2   | 7.3   | 40.1  | 14.2  | 24.3  | 13.7  | 0.307163336 | 14.05   | 23.075  | 9.025   | 0.608884074 | 0.213   | 1.748  |
| 98793_at   | 41.3  | 29.5  | 22.3  | 45    | 18.2  | 41.3  | 25.2  | 50.6  | 0.941224995 | 34.525  | 33.825  | 0.7     | 1.020694752 | 0.8389  | -1.062 |
| 98794_at   | 43.2  | 6.9   | 20.3  | 44.6  | 26.8  | 47.6  | 30.5  | 51.8  | 0.387094432 | 28.75   | 39.175  | 10.425  | 0.733886407 | 0.3237  | 1.653  |
| 98795_at   | 42.8  | 38.3  | 27.4  | 34.6  | 37.5  | 88.9  | 35.3  | 38.2  | 0.358880841 | 35.775  | 49.975  | 14.2    | 0.715857929 | 0.3091  | 1.305  |
| 98796_at   | 29.7  | 9.3   | 3.5   | 8.3   | 18.7  | 26.3  | 12.8  | 2.9   | 0.756681591 | 12.7    | 15.175  | 2.475   | 0.836902801 | 0.7611  | 1.233  |
| 98797_at   | 101.3 | 21.7  | 78.4  | 31    | 32.8  | 32.8  | 55.6  | 26.3  | 0.354720354 | 58.1    | 36.875  | 21.225  | 1.57559322  | 0.4731  | -1.359 |
| 98798_at   | 74.7  | 69.1  | 75.6  | 77.7  | 74.4  | 87.5  | 43.2  | 45.1  | 0.365162276 | 74.275  | 62.55   | 11.725  | 1.18745004  | 0.2704  | -1.243 |
| 98799_g_at | 14.8  | 8.4   | 12.5  | 10.8  | 10.2  | 15.8  | 15.2  | 11    | 0.496172472 | 11.625  | 13.05   | 1.425   | 0.890804598 | 0.4946  | 1.126  |
| 98800_at   | 193.7 | 99.1  | 116.1 | 127.2 | 125.7 | 205.8 | 94.5  | 118   | 0.952615878 | 134.025 | 136     | 1.975   | 0.985477941 | 0.9842  | 1.005  |
| 98801_at   | 17    | 9.3   | 1.9   | 7     | 2.8   | 9.1   | 3.3   | 7     | 0.400111275 | 8.8     | 5.55    | 3.25    | 1.585585586 | 0.5844  | -1.37  |
| 98802_at   | 9.2   | 12.5  | 2.1   | 2     | 1.9   | 3.5   | 3.8   | 7.5   | 0.472452876 | 6.45    | 4.175   | 2.275   | 1.54491018  | 0.6961  | -1.257 |
| 98803_at   | 38.3  | 11.6  | 42.6  | 46.6  | 37.7  | 22.7  | 39    | 41.1  | 0.970472909 | 34.775  | 35.125  | 0.35    | 0.990035587 | 0.7667  | 1.116  |
| 98804_at   | 17.6  | 18.5  | 23.3  | 17    | 41.4  | 36    | 4.8   | 13.4  | 0.62568868  | 19.1    | 23.9    | 4.8     | 0.79916318  | 0.8901  | -1.075 |
| 98805_at   | 7.8   | 6     | 6.5   | 6.7   | 4.5   | 8.2   | 6.7   | 6.4   | 0.740222739 | 6.75    | 6.45    | 0.3     | 1.046511628 | 0.6756  | -1.061 |
| 98806_s_at | 157.7 | 95.1  | 80.5  | 108   | 112.3 | 117.3 | 173.5 | 138.5 | 0.294874897 | 110.325 | 135.4   | 25.075  | 0.814807976 | 0.2487  | 1.248  |
| 98807_at   | 140.3 | 158.2 | 145.2 | 209.3 | 134.9 | 148.5 | 178.8 | 141.8 | 0.538018254 | 163.25  | 151     | 12.25   | 1.081125828 | 0.5418  | -1.073 |
| 98808_at   | 126.6 | 58.5  | 40.7  | 56.6  | 50.4  | 146.2 | 34    | 65.2  | 0.918701718 | 70.6    | 73.95   | 3.35    | 0.954699121 | 0.9798  | 1.01   |
| 98809_s_at | 29.8  | 33.5  | 8.1   | 36.1  | 19.8  | 70.8  | 61.6  | 57    | 0.108641685 | 26.875  | 52.3    | 25.425  | 0.513862333 | 0.175   | 2.024  |
| 98810_at   | 118.2 | 66.8  | 63.1  | 87.9  | 59.4  | 101.3 | 62.3  | 70.2  | 0.527203895 | 84      | 73.3    | 10.7    | 1.145975443 | 0.5244  | -1.136 |
| 98811_at   | 32.5  | 35.3  | 19.5  | 40.2  | 21.2  | 48.3  | 33.7  | 52.6  | 0.439167623 | 31.875  | 38.95   | 7.075   | 0.818356868 | 0.5248  | 1.193  |
| 98812_at   | 5.8   | 3.6   | 1.6   | 1.9   | 2.7   | 1.6   | 1.9   | 3.3   | 0.459942361 | 3.225   | 2.375   | 0.85    | 1.357894737 | 0.541   | -1.242 |
| 98813_at   | 3.2   | 2.3   | 1.2   | 3.5   | 1.2   | 21.4  | 14.5  | 3.4   | 0.209232626 | 2.55    | 10.125  | 7.575   | 0.251851852 | 0.2386  | 2.513  |
| 98814_at   | 3.8   | 5.1   | 12    | 13.1  | 17.6  | 6.4   | 7.2   | 22.2  | 0.336733286 | 8.5     | 13.35   | 4.85    | 0.63670412  | 0.3518  | 1.555  |
| 98815_at   | 12.7  | 6.9   | 8     | 5.1   | 5.8   | 12.7  | 9.8   | 5.9   | 0.877246841 | 8.175   | 8.55    | 0.375   | 0.956140351 | 0.8742  | 1.046  |
| 98816_s_at | 70.5  | 17.8  | 45.6  | 17.5  | 15.9  | 102.4 | 16    | 69.3  | 0.621569754 | 37.85   | 50.9    | 13.05   | 0.743614931 | 0.8127  | 1.16   |
| 98817_at   | 74.6  | 43.8  | 49.1  | 96.8  | 47.2  | 57.2  | 46.7  | 47.4  | 0.273469369 | 66.075  | 49.625  | 16.45   | 1.331486146 | 0.2558  | -1.27  |
| 98818_at   | 53.2  | 56.9  | 89    | 100.3 | 39.9  | 80.3  | 143.2 | 106.8 | 0.508596829 | 74.85   | 92.55   | 17.7    | 0.808752026 | 0.6551  | 1.16   |
| 98819_at   | 10.1  | 5     | 12.5  | 10.1  | 8.9   | 36.6  | 7.6   | 15.4  | 0.338141058 | 9.425   | 17.125  | 7.7     | 0.550364964 | 0.3131  | 1.567  |
| 98820_g_at | 13.4  | 3.3   | 3.8   | 4.6   | 4.4   | 13    | 10.6  | 13.9  | 0.239038168 | 6.275   | 10.475  | 4.2     | 0.599045346 | 0.2011  | 1.809  |
| 98821_at   | 12.4  | 5.6   | 11    | 18.5  | 7.6   | 29.1  | 9.1   | 7     | 0.833518779 | 11.875  | 13.2    | 1.325   | 0.899621212 | 0.9943  | -1.003 |
| 98822_at   | 132   | 184.6 | 105.9 | 129.9 | 308.8 | 289.6 | 106.1 | 206.9 | 0.14612122  | 138.1   | 227.85  | 89.75   | 0.606100505 | 0.1534  | 1.555  |
| 98823_at   | 12.7  | 10.8  | 3.3   | 3.3   | 3.1   | 8.1   | 9.1   | 8.9   | 0.940215781 | 7.525   | 7.3     | 0.225   | 1.030821918 | 0.8785  | 1.074  |
| 98824_at   | 14    | 16    | 12.3  | 16    | 15.4  | 4.1   | 15.1  | 5.2   | 0.231003982 | 14.575  | 9.95    | 4.625   | 1.464824121 | 0.1724  | -1.726 |
| 98825_at   | 313.5 | 374.1 | 223.1 | 244.4 | 211.8 | 219   | 177.8 | 185.7 | 0.074164796 | 288.775 | 198.575 | 90.2    | 1.454236435 | 0.0316  | -1.429 |
| 98826_at   | 370   | 304.7 | 208.4 | 255.4 | 282.2 | 456.3 | 249.5 | 240.3 | 0.728133863 | 284.625 | 307.075 | 22.45   | 0.926890825 | 0.7537  | 1.065  |
| 98827_i_at | 1.7   | 2.2   | 4.4   | 1.3   | 1     | 1.8   | 7.5   | 3     | 0.593800956 | 2.4     | 3.325   | 0.925   | 0.721804511 | 0.7293  | 1.197  |
| 98828_at   | 11.2  | 19.7  | 24.3  | 9.3   | 5.3   | 9.4   | 9.5   | 8.7   | 0.108662986 | 16.125  | 8.225   | 7.9     | 1.960486322 | 0.05893 | -1.858 |
| 98829_at   | 9.8   | 5.4   | 18.2  | 22.2  | 18.3  | 31.9  | 3.4   | 12.9  | 0.71573948  | 13.9    | 16.625  | 2.725   | 0.836090226 | 0.9407  | 1.046  |
| 98830_at   | 31.5  | 5.8   | 7.5   | 19.5  | 22    | 36.2  | 24    | 34.4  | 0.120654211 | 16.075  | 29.15   | 13.075  | 0.551457976 | 0.1034  | 2.227  |
| 98831_at   | 143.1 | 158.3 | 130.4 | 84.6  | 119.2 | 235   | 180.9 | 102   | 0.423260581 | 129.1   | 159.275 | 30.175  | 0.810547795 | 0.4701  | 1.199  |



|            |        |        |        |        |        |        |        |        |             |          |          |        |             |          |        |
|------------|--------|--------|--------|--------|--------|--------|--------|--------|-------------|----------|----------|--------|-------------|----------|--------|
| 98832_at   | 62.6   | 29.2   | 35.6   | 30.5   | 35.9   | 40.6   | 6.8    | 46.7   | 0.57681348  | 39.475   | 32.5     | 6.975  | 1.214615385 | 0.4797   | -1.439 |
| 98833_at   | 39.7   | 12.3   | 13.4   | 26.4   | 6.9    | 20.3   | 16.1   | 4.2    | 0.199935014 | 22.95    | 11.875   | 11.075 | 1.932631579 | 0.168    | -2.065 |
| 98834_at   | 31.7   | 83.5   | 40.6   | 63.3   | 47.3   | 44.2   | 70.4   | 44.9   | 0.826282415 | 54.775   | 51.7     | 3.075  | 1.059477756 | 0.9755   | -1.008 |
| 98835_at   | 110    | 51.5   | 91.2   | 84.6   | 61.8   | 153.8  | 174.1  | 116.6  | 0.193159363 | 84.325   | 126.575  | 42.25  | 0.666205807 | 0.2367   | 1.449  |
| 98836_at   | 8.5    | 7.9    | 8.6    | 6.7    | 7.6    | 14.9   | 8.8    | 40.5   | 0.283207266 | 7.925    | 17.95    | 10.025 | 0.441504178 | 0.1752   | 1.8    |
| 98837_at   | 70.6   | 35.7   | 80     | 65.3   | 45.8   | 107.6  | 79     | 70.5   | 0.453901946 | 62.9     | 75.725   | 12.825 | 0.830637174 | 0.494    | 1.201  |
| 98838_at   | 7.5    | 10.6   | 6.3    | 6.4    | 8.2    | 10.2   | 14     | 12.5   | 0.075430117 | 7.7      | 11.225   | 3.525  | 0.68596882  | 0.06279  | 1.462  |
| 98839_at   | 92.4   | 108.2  | 118.9  | 151.2  | 158.3  | 109.9  | 185.9  | 227.9  | 0.122347585 | 117.675  | 170.5    | 52.825 | 0.690175953 | 0.1062   | 1.422  |
| 98840_at   | 56     | 25.2   | 33     | 43.3   | 46.8   | 66.4   | 10.9   | 40.7   | 0.896300887 | 39.375   | 41.2     | 1.825  | 0.955703883 | 0.833    | -1.099 |
| 98841_at   | 58.3   | 63.7   | 78.8   | 86.8   | 38.8   | 72.4   | 95     | 70.6   | 0.847548185 | 71.9     | 69.2     | 2.7    | 1.039017341 | 0.7337   | -1.078 |
| 98842_at   | 42.5   | 29     | 41.4   | 20.1   | 81.5   | 78.6   | 48.8   | 63.7   | 0.01117453  | 33.25    | 68.15    | 34.9   | 0.487894351 | 0.01297  | 2.099  |
| 98843_at   | 6.5    | 17     | 15     | 7.2    | 22.8   | 28.7   | 3.4    | 30.5   | 0.214509989 | 11.425   | 21.35    | 9.925  | 0.535128806 | 0.4834   | 1.542  |
| 98844_at   | 82.4   | 99.4   | 69.9   | 74.8   | 71     | 149.2  | 85.4   | 142.7  | 0.224869603 | 81.625   | 112.075  | 30.45  | 0.728306937 | 0.2176   | 1.318  |
| 98845_at   | 9.3    | 8.2    | 4.4    | 10.4   | 5.1    | 58.3   | 12.8   | 31.4   | 0.209816669 | 8.075    | 26.9     | 18.825 | 0.300185874 | 0.1666   | 2.426  |
| 98846_f_at | 270.1  | 210.9  | 184.9  | 203.2  | 144.9  | 243.6  | 187    | 262.9  | 0.822815621 | 217.275  | 209.6    | 7.675  | 1.036617366 | 0.7507   | -1.054 |
| 98847_at   | 90.2   | 51.4   | 67.3   | 67     | 34     | 107.7  | 53.3   | 61.2   | 0.791577143 | 68.975   | 64.05    | 4.925  | 1.076893052 | 0.6146   | -1.15  |
| 98848_at   | 162.6  | 177.4  | 276.1  | 231.8  | 65     | 50.8   | 198.3  | 216.5  | 0.178961276 | 211.975  | 132.65   | 79.325 | 1.598002262 | 0.1541   | -1.9   |
| 98849_at   | 88.8   | 68.7   | 92.5   | 127.8  | 83.7   | 102.6  | 106.5  | 117    | 0.596629455 | 94.45    | 102.45   | 8      | 0.921913128 | 0.5233   | 1.104  |
| 98850_at   | 38.8   | 40     | 44.1   | 46.9   | 56.9   | 63.5   | 78.1   | 65.1   | 0.008055082 | 42.45    | 65.9     | 23.45  | 0.644157815 | 0.001477 | 1.547  |
| 98851_at   | 79     | 91.4   | 31.2   | 84.8   | 67.7   | 67.8   | 43     | 63.9   | 0.50140599  | 71.6     | 60.6     | 11     | 1.181518152 | 0.7179   | -1.11  |
| 98852_at   | 130.9  | 130.9  | 98.6   | 121.3  | 132.8  | 116.5  | 88.1   | 125.6  | 0.720203566 | 120.425  | 115.75   | 4.675  | 1.040388769 | 0.704    | -1.046 |
| 98853_at   | 57.5   | 49.5   | 24.6   | 34.2   | 53.7   | 61.1   | 45.9   | 59.6   | 0.166768919 | 41.45    | 55.075   | 13.625 | 0.752610077 | 0.1523   | 1.391  |
| 98854_at   | 57.9   | 31.3   | 22.4   | 49.4   | 54.4   | 69     | 38.3   | 37.7   | 0.418173604 | 40.25    | 49.85    | 9.6    | 0.807422267 | 0.3774   | 1.283  |
| 98855_r_at | 132.3  | 164.8  | 186    | 213.6  | 237.5  | 200.1  | 208.3  | 171.7  | 0.218571667 | 174.175  | 204.4    | 30.225 | 0.85212818  | 0.2148   | 1.184  |
| 98856_at   | 30.9   | 8.9    | 5.6    | 11.6   | 16.3   | 11.5   | 3.5    | 5.6    | 0.470797561 | 14.25    | 9.225    | 5.025  | 1.544715447 | 0.4574   | -1.485 |
| 98857_at   | 5      | 4.6    | 4.5    | 7.7    | 3.5    | 24.9   | 5.7    | 2.8    | 0.526951996 | 5.45     | 9.225    | 3.775  | 0.590785908 | 0.7864   | 1.154  |
| 98858_at   | 22.2   | 21.7   | 34.3   | 26.9   | 21.6   | 23     | 18.9   | 18.1   | 0.136167133 | 26.275   | 20.4     | 5.875  | 1.287990196 | 0.08979  | -1.274 |
| 98859_at   | 97.2   | 102.1  | 103.2  | 96.9   | 173.3  | 132.5  | 83.8   | 89.2   | 0.413348422 | 99.85    | 119.7    | 19.85  | 0.834168755 | 0.4585   | 1.146  |
| 98860_at   | 16.2   | 12.3   | 18.8   | 12.2   | 18.1   | 15     | 15.8   | 15.2   | 0.54733861  | 14.875   | 16.025   | 1.15   | 0.928237129 | 0.4668   | 1.094  |
| 98861_at   | 208.8  | 79.5   | 98.2   | 89.6   | 45.9   | 205.1  | 99.9   | 105    | 0.914053928 | 119.025  | 113.975  | 5.05   | 1.044307962 | 0.8038   | -1.103 |
| 98862_at   | 121.5  | 86     | 66     | 85.4   | 94.3   | 130.6  | 72.1   | 64.8   | 0.97050829  | 89.725   | 90.45    | 0.725  | 0.991984522 | 0.9769   | 1.006  |
| 98863_at   | 29.9   | 27     | 27.9   | 19.9   | 40     | 37.3   | 42     | 42.4   | 0.002907641 | 26.175   | 40.425   | 14.25  | 0.647495362 | 0.003345 | 1.559  |
| 98864_s_at | 85.5   | 40.6   | 47.5   | 64.2   | 43.4   | 82.1   | 59.6   | 48.1   | 0.933509429 | 59.45    | 58.3     | 1.15   | 1.019725557 | 0.9682   | 1.009  |
| 98865_at   | 102    | 75.8   | 151.4  | 102.9  | 121.5  | 169.9  | 125.6  | 123.5  | 0.219834627 | 108.025  | 135.125  | 27.1   | 0.799444958 | 0.1837   | 1.277  |
| 98866_at   | 6.2    | 38.9   | 7.2    | 30.9   | 6.5    | 18.4   | 8.4    | 31.7   | 0.670476391 | 20.8     | 16.25    | 4.55   | 1.28        | 0.8371   | -1.138 |
| 98867_at   | 71     | 73.2   | 44.7   | 47.3   | 51     | 62     | 62.7   | 79.4   | 0.640057681 | 59.05    | 63.775   | 4.725  | 0.925911407 | 0.5948   | 1.093  |
| 98868_at   | 51.1   | 53.4   | 35.1   | 65.4   | 69     | 77.3   | 56.3   | 71     | 0.070530057 | 51.25    | 68.4     | 17.15  | 0.749269006 | 0.08095  | 1.358  |
| 98869_g_at | 253.7  | 182.8  | 176.1  | 242.1  | 173.9  | 219.5  | 185.7  | 238.4  | 0.722602874 | 213.675  | 204.375  | 9.3    | 1.045504587 | 0.7537   | -1.04  |
| 98870_at   | 350.9  | 280.8  | 333.8  | 293    | 218.1  | 298.6  | 285.6  | 233.2  | 0.074167828 | 314.625  | 258.875  | 55.75  | 1.215354901 | 0.07498  | -1.221 |
| 98871_at   | 37.5   | 31     | 6.8    | 21.6   | 22.4   | 51.5   | 17.3   | 28.5   | 0.592096037 | 24.225   | 29.925   | 5.7    | 0.80952381  | 0.5284   | 1.35   |
| 98872_at   | 33.8   | 24     | 17     | 19     | 4.5    | 34.3   | 16.4   | 24.1   | 0.641927182 | 23.45    | 19.825   | 3.625  | 1.182849937 | 0.4667   | -1.438 |
| 98873_at   | 33.7   | 111.4  | 148.7  | 87     | 115.5  | 37.7   | 103.9  | 44.4   | 0.550946789 | 95.2     | 75.375   | 19.825 | 1.263018242 | 0.627    | -1.247 |
| 98874_at   | 40.1   | 34.6   | 101.9  | 102.4  | 21.2   | 77.3   | 114.1  | 45.2   | 0.853647542 | 69.75    | 64.45    | 5.3    | 1.08223429  | 0.7828   | -1.144 |
| 98875_at   | 274.9  | 471.3  | 331.8  | 376.2  | 364.1  | 284.5  | 362.8  | 288.7  | 0.45320115  | 363.55   | 325.025  | 38.525 | 1.118529344 | 0.4794   | -1.105 |
| 98876_at   | 686.3  | 794.1  | 625.3  | 539.2  | 747.1  | 696.6  | 619.7  | 546.9  | 0.904860991 | 661.225  | 652.575  | 8.65   | 1.013255181 | 0.9258   | 1.01   |
| 98878_r_at | 291.2  | 237.5  | 188.6  | 223.7  | 203    | 209.6  | 149.9  | 168.1  | 0.09268647  | 235.25   | 182.65   | 52.6   | 1.28798248  | 0.08147  | -1.285 |
| 98880_at   | 1061.4 | 1061   | 1021.2 | 945.6  | 1176.7 | 1019.4 | 987.7  | 943.1  | 0.877065677 | 1022.3   | 1031.725 | 9.425  | 0.990864814 | 0.9061   | 1.007  |
| 98881_at   | 699.5  | 753.1  | 682.6  | 655    | 648    | 708.2  | 603.4  | 573.7  | 0.128631376 | 697.55   | 633.325  | 64.225 | 1.101409229 | 0.1197   | -1.103 |
| 98882_s_at | 1315.9 | 1107.4 | 1288.6 | 1288.6 | 1063.2 | 1302.2 | 1312.4 | 1331.4 | 0.97911436  | 1250.125 | 1252.3   | 2.175  | 0.998263196 | 0.999    | 1      |
| 98883_r_at | 23.3   | 33.5   | 22.2   | 48.8   | 12.1   | 28.3   | 31.8   | 19.3   | 0.282055959 | 31.95    | 22.875   | 9.075  | 1.396721311 | 0.2682   | -1.414 |
| 98884_r_at | 168.6  | 251.9  | 355    | 540.8  | 362.5  | 312.4  | 358.9  | 470.9  | 0.616678142 | 329.075  | 376.175  | 47.1   | 0.874792317 | 0.4473   | 1.238  |
| 98886_at   | 1031.9 | 1112.7 | 797.7  | 741.5  | 989    | 999.2  | 760.2  | 771.4  | 0.726370796 | 920.95   | 879.95   | 41     | 1.046593556 | 0.7593   | -1.04  |
| 98887_at   | 1501   | 1853.8 | 2137.8 | 1554   | 1979.7 | 1943.8 | 1912.7 | 860.5  | 0.789352123 | 1761.65  | 1674.175 | 87.475 | 1.052249615 | 0.6823   | -1.099 |
| 98889_at   | 220.4  | 191.9  | 142.2  | 208    | 140.3  | 241.4  | 177.9  | 165.2  | 0.744373821 | 190.625  | 181.2    | 9.425  | 1.052014349 | 0.7158   | -1.059 |
| 98890_at   | 268.3  | 191.8  | 513.7  | 371.4  | 228.1  | 339.4  | 247.5  | 361.8  | 0.612283502 | 336.3    | 294.2    | 42.1   | 1.143099932 | 0.7304   | -1.091 |
| 98891_at   | 181.3  | 162.7  | 215.7  | 284.1  | 217    | 187.3  | 317.1  | 267.6  | 0.389628385 | 210.95   | 247.25   | 36.3   | 0.853185035 | 0.3732   | 1.175  |



|            |        |        |        |        |        |        |        |        |             |          |          |         |             |         |        |
|------------|--------|--------|--------|--------|--------|--------|--------|--------|-------------|----------|----------|---------|-------------|---------|--------|
| 98892_at   | 128.6  | 155.1  | 249.5  | 243.7  | 254.5  | 235.9  | 263.1  | 285.4  | 0.119865209 | 194.225  | 259.725  | 65.5    | 0.747810184 | 0.102   | 1.388  |
| 98893_at   | 286.3  | 409.5  | 545.4  | 674.4  | 483.2  | 437.6  | 565.9  | 622    | 0.630821471 | 478.9    | 527.175  | 48.275  | 0.908426993 | 0.5237  | 1.146  |
| 98894_at   | 670.4  | 745.8  | 979.4  | 691.3  | 790.5  | 712.1  | 695.8  | 709.2  | 0.58231032  | 771.725  | 726.9    | 44.825  | 1.061665979 | 0.6066  | -1.051 |
| 98896_at   | 1303.8 | 847.1  | 1135   | 1069.5 | 1048.4 | 1253.6 | 1074   | 997.7  | 0.968389286 | 1088.85  | 1093.425 | 4.575   | 0.9958159   | 0.9083  | 1.012  |
| 98901_at   | 1306.2 | 1930.8 | 1336.8 | 1269.6 | 2141   | 1437   | 1188.4 | 1334.2 | 0.816044724 | 1460.85  | 1525.15  | 64.3    | 0.957840212 | 0.8463  | 1.033  |
| 98902_at   | 13.2   | 7.8    | 5      | 2.2    | 11.7   | 24.9   | 9.7    | 1.6    | 0.407141994 | 7.05     | 11.975   | 4.925   | 0.588726514 | 0.6467  | 1.4    |
| 98903_at   | 63.5   | 45.6   | 23.2   | 37.8   | 37.2   | 67.6   | 21.5   | 46.5   | 0.959606932 | 42.525   | 43.2     | 0.675   | 0.984375    | 0.9919  | 1.003  |
| 98904_at   | 1186.7 | 1400.4 | 1268.1 | 1306.7 | 1636.2 | 1397.9 | 1174.3 | 1399.7 | 0.34124405  | 1290.475 | 1402.025 | 111.55  | 0.920436511 | 0.345   | 1.081  |
| 98905_at   | 5223.4 | 6257.7 | 5495.6 | 5948.9 | 5499.8 | 5672.9 | 6979.2 | 6102.4 | 0.444838205 | 5731.4   | 6063.575 | 332.175 | 0.945217961 | 0.4445  | 1.056  |
| 98906_at   | 484.1  | 614.4  | 534.5  | 739.1  | 609.9  | 580.5  | 566.3  | 651    | 0.887364431 | 593.025  | 601.925  | 8.9     | 0.985214105 | 0.7951  | 1.027  |
| 98908_at   | 1406.9 | 1394.6 | 1851.6 | 2016.8 | 1411.8 | 1256.5 | 1548.1 | 1751.4 | 0.394936607 | 1667.475 | 1491.95  | 175.525 | 1.117648045 | 0.4063  | -1.111 |
| 98909_at   | 863.2  | 894.8  | 897.5  | 888.8  | 1028.8 | 851.9  | 1051.6 | 1024.3 | 0.11001995  | 886.075  | 989.15   | 103.075 | 0.895794369 | 0.07583 | 1.113  |
| 98910_at   | 829    | 1277.9 | 1015   | 939    | 1199   | 1011.1 | 953.1  | 1019.8 | 0.791960093 | 1015.225 | 1045.75  | 30.525  | 0.970810423 | 0.7216  | 1.039  |
| 98911_at   | 2900.2 | 2640.7 | 2639.1 | 2248   | 2262.8 | 2142.2 | 1845.6 | 2013   | 0.019030813 | 2607     | 2065.9   | 541.1   | 1.261919744 | 0.015   | -1.26  |
| 98912_at   | 609    | 674.7  | 620.6  | 579.8  | 649.1  | 509.4  | 636.7  | 672.5  | 0.925680655 | 621.025  | 616.925  | 4.1     | 1.006645865 | 0.8828  | -1.011 |
| 98914_at   | 2055.4 | 2478.2 | 2257.8 | 2209.3 | 2314.4 | 2137.7 | 2137.4 | 2267.4 | 0.731477797 | 2250.175 | 2214.225 | 35.95   | 1.016235929 | 0.751   | 1.015  |
| 98915_at   | 922.3  | 875.2  | 1133.4 | 831.8  | 943.9  | 905.9  | 653.3  | 765.3  | 0.2387276   | 940.675  | 817.1    | 123.575 | 1.151236079 | 0.2313  | -1.155 |
| 98916_at   | 180.1  | 92.9   | 186    | 165.6  | 82.6   | 174.3  | 145.8  | 142.3  | 0.516827929 | 156.15   | 136.25   | 19.9    | 1.146055046 | 0.5735  | -1.146 |
| 98917_at   | 844.6  | 953.2  | 1134   | 1079.9 | 1055.2 | 956.9  | 1259.7 | 1031   | 0.457912562 | 1002.925 | 1075.7   | 72.775  | 0.932346379 | 0.4493  | 1.074  |
| 98918_at   | 2062.2 | 1960.7 | 1979.9 | 1947.8 | 1816.5 | 2387.2 | 2134.6 | 2051   | 0.424638313 | 1987.65  | 2097.325 | 109.675 | 0.947707198 | 0.4275  | 1.05   |
| 98919_at   | 10.2   | 3.6    | 4.5    | 5.4    | 3.4    | 14.7   | 4.4    | 6.7    | 0.662025023 | 5.925    | 7.3      | 1.375   | 0.811643836 | 0.7606  | 1.132  |
| 98920_g_at | 752.8  | 812.6  | 690.8  | 623.9  | 732.9  | 844.8  | 599.2  | 691.4  | 0.965398258 | 720.025  | 717.075  | 2.95    | 1.004113935 | 0.9426  | 1.007  |
| 98921_at   | 1088.2 | 891.3  | 814.7  | 786.5  | 987.4  | 1155.8 | 828.1  | 768.1  | 0.732386386 | 895.175  | 934.85   | 39.675  | 0.957560036 | 0.7513  | 1.04   |
| 98922_at   | 267.9  | 183.8  | 314.8  | 274.9  | 271    | 204.4  | 431.4  | 312.4  | 0.457752349 | 260.35   | 304.8    | 44.45   | 0.854166667 | 0.4963  | 1.15   |
| 98923_at   | 569.7  | 534.4  | 626.9  | 606.4  | 678.5  | 631.5  | 684.2  | 673.1  | 0.018522568 | 584.35   | 666.825  | 82.475  | 0.876316875 | 0.01532 | 1.143  |
| 98924_at   | 109.9  | 119.7  | 107.1  | 104.7  | 112.5  | 125.1  | 85.9   | 84.6   | 0.478305861 | 110.35   | 102.025  | 8.325   | 1.081597648 | 0.4038  | -1.096 |
| 98925_at   | 17.6   | 26.8   | 78.1   | 44.3   | 29.7   | 29.9   | 38.5   | 64.5   | 0.949151882 | 41.7     | 40.65    | 1.05    | 1.025830258 | 0.8436  | 1.079  |
| 98926_at   | 387.8  | 510.4  | 596.6  | 681.6  | 521.3  | 512.4  | 485.8  | 562.4  | 0.736709585 | 544.1    | 520.475  | 23.625  | 1.045391229 | 0.8509  | -1.025 |
| 98927_at   | 1448.9 | 1318   | 1766.6 | 1669.3 | 1509.8 | 1414.9 | 1523.6 | 1658   | 0.841565332 | 1550.7   | 1526.575 | 24.125  | 1.015803351 | 0.8904  | 1.011  |
| 98928_at   | 1117.2 | 1053.5 | 916.4  | 996.6  | 949.1  | 1093.1 | 1023.1 | 957.3  | 0.788299598 | 1020.925 | 1005.65  | 15.275  | 1.015189181 | 0.8011  | 1.014  |
| 98929_at   | 947.6  | 1036.9 | 860.5  | 721.2  | 981.2  | 939.5  | 972.8  | 861.5  | 0.551174674 | 891.55   | 938.75   | 47.2    | 0.949720373 | 0.5033  | 1.061  |
| 98930_at   | 2321.2 | 2320.1 | 1417.6 | 1322.5 | 1837.8 | 1992.3 | 1531.4 | 1492.3 | 0.682745048 | 1845.35  | 1713.45  | 131.9   | 1.076979194 | 0.7895  | -1.048 |
| 98931_at   | 252.6  | 313.6  | 478    | 582.8  | 421.3  | 330.2  | 579.5  | 545.2  | 0.537535382 | 406.75   | 469.05   | 62.3    | 0.867178339 | 0.4834  | 1.188  |
| 98932_at   | 9.9    | 4.9    | 18.5   | 39.8   | 25.6   | 47.5   | 24.4   | 18.1   | 0.331303584 | 18.275   | 28.9     | 10.625  | 0.632352941 | 0.2164  | 1.969  |
| 98933_at   | 1111.7 | 1139.7 | 1270.1 | 1311.7 | 1340.3 | 1184.4 | 1018.3 | 1272.8 | 0.961039934 | 1208.3   | 1203.95  | 4.35    | 1.003613107 | 0.9324  | 1.006  |
| 98934_at   | 1078   | 1237.7 | 929.6  | 1000   | 1182.6 | 1063.4 | 1185.6 | 930.4  | 0.755922719 | 1061.325 | 1090.5   | 29.175  | 0.973246217 | 0.7495  | 1.028  |
| 98936_at   | 708.9  | 566    | 652.9  | 322.9  | 601.1  | 642.1  | 476.9  | 374.4  | 0.723257167 | 562.675  | 523.625  | 39.05   | 1.074576271 | 0.82    | -1.053 |
| 98937_at   | 2506.4 | 2360.3 | 2342.8 | 2241.2 | 2021.6 | 1975.1 | 2096   | 2239.6 | 0.012657362 | 2362.675 | 2083.075 | 279.6   | 1.134224644 | 0.01235 | -1.135 |
| 98938_at   | 1827.1 | 1611.7 | 1154.9 | 970.6  | 1031.5 | 1342.5 | 929.4  | 1013.7 | 0.222425356 | 1391.075 | 1079.275 | 311.8   | 1.28889764  | 0.2122  | -1.261 |
| 98940_at   | 14     | 9.5    | 6.6    | 1.1    | 3.6    | 13.8   | 6      | 6.2    | 0.91272046  | 7.8      | 7.4      | 0.4     | 1.054054054 | 0.808   | 1.17   |
| 98941_r_at | 18.7   | 8.6    | 5.7    | 18.5   | 11     | 24.7   | 14.9   | 12.7   | 0.540611012 | 12.875   | 15.825   | 2.95    | 0.813586098 | 0.4504  | 1.32   |
| 98942_r_at | 63.2   | 141.5  | 195.7  | 277    | 298.6  | 134.7  | 127.2  | 246.9  | 0.617774385 | 169.35   | 201.85   | 32.5    | 0.838989349 | 0.554   | 1.27   |
| 98943_at   | 285.7  | 233.2  | 192    | 166.1  | 249.1  | 280.5  | 232    | 261.8  | 0.263459732 | 219.25   | 255.85   | 36.6    | 0.85694743  | 0.214   | 1.189  |
| 98944_at   | 1005.8 | 947.1  | 1070.2 | 785.9  | 980.7  | 991.5  | 1029.6 | 926.8  | 0.66866148  | 952.25   | 982.15   | 29.9    | 0.969556585 | 0.6198  | 1.037  |
| 98945_at   | 92.2   | 136.1  | 151.4  | 211.8  | 175    | 159.9  | 141.4  | 199.4  | 0.484590733 | 147.875  | 168.925  | 21.05   | 0.875388486 | 0.4006  | 1.183  |
| 98946_at   | 1370.9 | 1296.8 | 1487.1 | 1562.5 | 1689.5 | 1212.6 | 1500.1 | 1579.2 | 0.600449347 | 1429.325 | 1495.35  | 66.025  | 0.955846457 | 0.644   | 1.041  |
| 98947_at   | 8.7    | 7.2    | 6.1    | 7      | 9.7    | 11.2   | 8.7    | 6.8    | 0.146043229 | 7.25     | 9.1      | 1.85    | 0.796703297 | 0.1331  | 1.246  |
| 98948_at   | 717.8  | 731.6  | 663.5  | 745.5  | 955.3  | 806.1  | 660.3  | 747.1  | 0.304682274 | 714.6    | 792.2    | 77.6    | 0.902044938 | 0.2872  | 1.1    |
| 98950_at   | 1233.2 | 1137   | 1308.6 | 1486.5 | 1014.6 | 1169.4 | 1176.6 | 1334.5 | 0.27906647  | 1291.325 | 1173.775 | 117.55  | 1.100146962 | 0.276   | -1.1   |
| 98951_at   | 301.4  | 218.3  | 193.5  | 332.1  | 175.1  | 198.8  | 254.7  | 321.5  | 0.626165147 | 261.325  | 237.525  | 23.8    | 1.100199979 | 0.6152  | -1.104 |
| 98952_at   | 40.1   | 222.4  | 257.2  | 336.1  | 117    | 200.6  | 229.6  | 380.2  | 0.837091943 | 213.95   | 231.85   | 17.9    | 0.922794911 | 0.6667  | 1.277  |
| 98953_at   | 1977.9 | 1683.8 | 1937.9 | 2093.4 | 1420.6 | 1747.2 | 1754.3 | 1862.4 | 0.128770003 | 1923.25  | 1696.125 | 227.125 | 1.133908173 | 0.1404  | -1.136 |
| 98954_f_at | 25     | 2.7    | 7.9    | 4.7    | 22.3   | 12.8   | 12.2   | 9      | 0.525526027 | 10.075   | 14.075   | 4       | 0.715808171 | 0.2618  | 1.885  |
| 98955_at   | 96.4   | 68.9   | 76.2   | 80.5   | 93.2   | 92.8   | 80.8   | 87     | 0.282880899 | 80.5     | 88.45    | 7.95    | 0.910118711 | 0.2451  | 1.106  |
| 98956_at   | 2724.1 | 2482.3 | 3411.4 | 2608.6 | 2512.4 | 2545.5 | 3021.2 | 2567.3 | 0.572993226 | 2806.6   | 2661.6   | 145     | 1.054478509 | 0.5799  | -1.049 |
| 98957_at   | 496.1  | 741    | 774.3  | 552.1  | 499.8  | 387.4  | 599.3  | 477.4  | 0.123844609 | 640.875  | 490.975  | 149.9   | 1.305310861 | 0.1147  | -1.298 |



|            |        |        |        |        |        |        |        |        |             |          |          |             |             |          |        |
|------------|--------|--------|--------|--------|--------|--------|--------|--------|-------------|----------|----------|-------------|-------------|----------|--------|
| 98958_at   | 228.7  | 235.2  | 278.9  | 288.5  | 258.2  | 277.9  | 312.8  | 366.3  | 0.161766018 | 257.825  | 303.8    | 45.975      | 0.848666886 | 0.1471   | 1.174  |
| 98959_at   | 409.9  | 452.5  | 600.3  | 545.5  | 455.9  | 405.6  | 616.5  | 524.7  | 0.983278755 | 502.05   | 500.675  | 1.375       | 1.002746293 | 0.9764   | 1.004  |
| 98960_s_at | 328    | 282.7  | 285.3  | 253.6  | 270.3  | 317    | 335    | 294.5  | 0.449556516 | 287.4    | 304.2    | 16.8        | 0.944773176 | 0.4423   | 1.059  |
| 98961_at   | 91.1   | 72.8   | 87     | 59.8   | 70.7   | 62.8   | 97.4   | 73.6   | 0.885472677 | 77.675   | 76.125   | 1.55        | 1.020361248 | 0.8824   | 1.021  |
| 98962_at   | 11.2   | 5.2    | 12.2   | 20.8   | 14.2   | 15.8   | 15     | 31.2   | 0.245817234 | 12.35    | 19.05    | 6.7         | 0.648293963 | 0.1999   | 1.63   |
| 98963_at   | 139.2  | 143.7  | 126.4  | 136.2  | 117.3  | 126.8  | 156.4  | 131.1  | 0.721924422 | 136.375  | 132.9    | 3.475       | 1.026147479 | 0.6645   | -1.031 |
| 98965_at   | 238.7  | 309.7  | 339.6  | 355.4  | 364.4  | 242.8  | 264.3  | 350    | 0.895437876 | 310.85   | 305.375  | 5.475       | 1.017928776 | 0.877    | 1.022  |
| 98966_at   | 208.9  | 222.7  | 204.5  | 241.2  | 340.2  | 252.9  | 350.5  | 300.8  | 0.019466704 | 219.325  | 311.1    | 91.775      | 0.704998393 | 0.006068 | 1.41   |
| 98967_at   | 21.4   | 44.7   | 19.5   | 46.7   | 88.8   | 12.3   | 95.2   | 37.4   | 0.304905608 | 33.075   | 58.425   | 25.35       | 0.566110398 | 0.5087   | 1.454  |
| 98968_at   | 68.2   | 66.2   | 78.4   | 81.1   | 68.7   | 82.5   | 66.1   | 79.7   | 0.891867832 | 73.475   | 74.25    | 0.775       | 0.98956229  | 0.8982   | 1.01   |
| 98969_at   | 160.2  | 112.4  | 202.5  | 239.7  | 134    | 49.3   | 169.1  | 136.4  | 0.182906169 | 178.7    | 122.2    | 56.5        | 1.462356792 | 0.2225   | -1.548 |
| 98970_at   | 218    | 275.2  | 280.5  | 251.7  | 191.3  | 257.6  | 310.5  | 212.1  | 0.674052133 | 256.35   | 242.875  | 13.475      | 1.055481215 | 0.6041   | -1.069 |
| 98971_at   | 40     | 44.5   | 16     | 10.7   | 24.6   | 36.6   | 16.6   | 40.9   | 0.860107007 | 27.8     | 29.675   | 1.875       | 0.936815501 | 0.6847   | 1.188  |
| 98972_at   | 663.7  | 714.9  | 537.8  | 617.8  | 684.4  | 830.7  | 766.6  | 694.5  | 0.072958639 | 633.55   | 744.05   | 110.5       | 0.851488475 | 0.07473  | 1.177  |
| 98973_at   | 1011.9 | 833.2  | 1175.6 | 1083.3 | 734.4  | 1053.7 | 1140.7 | 967.1  | 0.663395919 | 1026     | 973.975  | 52.025      | 1.053415129 | 0.6516   | -1.059 |
| 98974_at   | 2.2    | 1.9    | 1.2    | 0.5    | 2.2    | 1.2    | 0.7    | 1.7    | 1           | 1.45     | 1.45     | 2.22045E-16 | 1           | 0.8844   | 1.065  |
| 98975_at   | 372.8  | 313.1  | 451.7  | 436.6  | 422    | 414.6  | 424.1  | 413.3  | 0.490658707 | 393.55   | 418.5    | 24.95       | 0.940382318 | 0.4269   | 1.074  |
| 98976_at   | 26.2   | 10.5   | 38.1   | 47.6   | 23.8   | 76.8   | 10.4   | 9.7    | 0.981967624 | 30.6     | 30.175   | 0.425       | 1.014084507 | 0.6857   | -1.283 |
| 98977_at   | 601.3  | 450.3  | 386    | 398.2  | 363.2  | 422.7  | 383.4  | 375.5  | 0.2393878   | 458.95   | 386.2    | 72.75       | 1.1883739   | 0.1866   | -1.171 |
| 98979_at   | 620.8  | 622.9  | 538.3  | 487.3  | 616.8  | 552.7  | 605.5  | 500.6  | 0.971745832 | 567.325  | 568.9    | 1.575       | 0.997231499 | 0.9537   | 1.005  |
| 98980_at   | 176.6  | 149.4  | 84.2   | 97.8   | 136.3  | 137.1  | 60.5   | 124.7  | 0.678887709 | 127      | 114.65   | 12.35       | 1.107719145 | 0.6957   | -1.114 |
| 98981_s_at | 1946.2 | 2315.4 | 2088   | 2889.8 | 2215.9 | 2130.4 | 2326.2 | 2662.1 | 0.92451929  | 2309.85  | 2333.65  | 23.8        | 0.989801384 | 0.8609   | 1.018  |
| 98982_at   | 3545.6 | 3051.9 | 3070.1 | 3357.3 | 2863.7 | 3017.2 | 3253.6 | 3036.1 | 0.194388701 | 3256.225 | 3042.65  | 213.575     | 1.070193746 | 0.186    | -1.069 |
| 98983_at   | 798.6  | 667.6  | 942.8  | 669.5  | 876.7  | 896    | 998.6  | 830    | 0.143975975 | 769.625  | 900.325  | 130.7       | 0.8548302   | 0.1205   | 1.179  |
| 98984_f_at | 296.6  | 282.8  | 249    | 269.8  | 272.6  | 246.5  | 306.9  | 283.2  | 0.870245365 | 274.55   | 277.3    | 2.75        | 0.990082943 | 0.8835   | 1.009  |
| 98987_at   | 336.9  | 180.3  | 168.9  | 213.8  | 146.8  | 337.1  | 236    | 184.3  | 0.98542836  | 224.975  | 226.05   | 1.075       | 0.995244415 | 0.9844   | 1.005  |
| 98988_at   | 63.2   | 85.1   | 82     | 99.1   | 89.2   | 77.8   | 70.5   | 108.1  | 0.726264788 | 82.35    | 86.4     | 4.05        | 0.953125    | 0.7293   | 1.049  |
| 98989_at   | 269.9  | 213.5  | 393.7  | 299.7  | 264.2  | 308.3  | 250.2  | 222.1  | 0.470554167 | 294.2    | 261.2    | 33          | 1.126339969 | 0.5057   | -1.107 |
| 98990_at   | 660.9  | 808.5  | 1039.7 | 912.9  | 613.3  | 597.3  | 629.9  | 558.2  | 0.047299675 | 855.5    | 599.675  | 255.825     | 1.426606078 | 0.01389  | -1.409 |
| 98991_at   | 189    | 183.3  | 212.8  | 215.2  | 229.1  | 174.1  | 327.8  | 249.3  | 0.254397855 | 200.075  | 245.075  | 45          | 0.81638274  | 0.2356   | 1.197  |
| 98992_at   | 394.9  | 451.7  | 361.8  | 321.3  | 403.6  | 399.4  | 417.4  | 310.9  | 0.991670059 | 382.425  | 382.825  | 0.4         | 0.998955136 | 0.9831   | 1.002  |
| 98993_at   | 1598   | 1421   | 2089.3 | 1830   | 1472.6 | 2834.1 | 1962.2 | 1365   | 0.65795371  | 1734.575 | 1908.475 | 173.9       | 0.908880127 | 0.7452   | 1.065  |
| 98994_at   | 20.7   | 18.1   | 18.6   | 18.8   | 23.4   | 37.8   | 17.6   | 24.7   | 0.207714356 | 19.05    | 25.875   | 6.825       | 0.736231884 | 0.1456   | 1.307  |
| 98995_at   | 302.8  | 267.8  | 274.2  | 299.5  | 309.4  | 353.6  | 312.4  | 323.4  | 0.028591791 | 286.075  | 324.7    | 38.625      | 0.881044041 | 0.02647  | 1.135  |
| 98996_at   | 1028.6 | 1076.5 | 1192.3 | 1421   | 1095.1 | 1067.4 | 1127.1 | 974.1  | 0.293556875 | 1179.6   | 1065.925 | 113.675     | 1.106644464 | 0.2711   | -1.1   |
| 98997_f_at | 80.2   | 23.4   | 52.9   | 53     | 46.7   | 46.4   | 16.6   | 67.3   | 0.621371539 | 52.375   | 44.25    | 8.125       | 1.183615819 | 0.6421   | -1.214 |
| 98998_r_at | 126.5  | 79     | 98.3   | 108.2  | 80.3   | 129.1  | 102.6  | 80.4   | 0.759045561 | 103      | 98.1     | 4.9         | 1.049949032 | 0.7313   | -1.056 |
| 98999_at   | 623.3  | 774.9  | 634.4  | 777.1  | 844.8  | 544.2  | 957    | 548.9  | 0.859910113 | 702.425  | 723.725  | 21.3        | 0.970568932 | 0.9833   | 1.003  |
| 99000_at   | 76.8   | 149.8  | 256.6  | 260.7  | 184.9  | 46.7   | 190.8  | 169.7  | 0.525390532 | 185.975  | 148.025  | 37.95       | 1.256375612 | 0.5914   | -1.288 |
| 99001_at   | 606.1  | 671.3  | 480.8  | 878.3  | 571.4  | 802.4  | 992.8  | 1041.1 | 0.206825823 | 659.125  | 851.925  | 192.8       | 0.773688998 | 0.2196   | 1.289  |
| 99004_r_at | 364.9  | 251.4  | 301.3  | 331.5  | 292.5  | 446.2  | 313    | 304.4  | 0.562524181 | 312.275  | 339.025  | 26.75       | 0.921097264 | 0.5662   | 1.079  |
| 99005_at   | 128.5  | 152    | 221.4  | 246.4  | 195.1  | 188.8  | 225.1  | 222.1  | 0.523928715 | 187.075  | 207.775  | 20.7        | 0.900373    | 0.4253   | 1.147  |
| 99006_at   | 7.6    | 8.9    | 7.8    | 16.4   | 5.4    | 13.1   | 12.8   | 9.1    | 0.97928974  | 10.175   | 10.1     | 0.075       | 1.007425743 | 0.964    | 1.013  |
| 99007_at   | 349.1  | 360.7  | 423.4  | 544    | 386.4  | 386.2  | 430.2  | 448.6  | 0.898690721 | 419.3    | 412.85   | 6.45        | 1.015623108 | 0.9878   | 1.002  |
| 99009_at   | 826.9  | 883.3  | 1071.7 | 1095   | 917.2  | 880.2  | 1503.2 | 1282.6 | 0.340417159 | 969.225  | 1145.8   | 176.575     | 0.845893699 | 0.3514   | 1.161  |
| 99010_at   | 4873.8 | 5006   | 4410.1 | 3392.1 | 4282.9 | 4699.1 | 4101.5 | 4272.8 | 0.844492161 | 4420.5   | 4339.075 | 81.425      | 1.01876552  | 0.9298   | 1.009  |
| 99011_at   | 27.3   | 41.3   | 31.6   | 57.1   | 59.9   | 60.9   | 28.1   | 42.4   | 0.439312839 | 39.325   | 47.825   | 8.5         | 0.822268688 | 0.4653   | 1.209  |
| 99012_at   | 11.6   | 7.4    | 4.9    | 9.2    | 5      | 7.5    | 6.4    | 5.3    | 0.21961558  | 8.275    | 6.05     | 2.225       | 1.367768595 | 0.2263   | -1.321 |
| 99013_f_at | 5347.5 | 5627.3 | 4351.1 | 3763   | 4957.9 | 5083.6 | 4654.4 | 4199.3 | 0.923704711 | 4772.225 | 4723.8   | 48.425      | 1.010251281 | 0.9995   | 1      |
| 99014_at   | 360.8  | 308.3  | 217.7  | 286.8  | 244.9  | 353.6  | 214.2  | 251.7  | 0.543233848 | 293.4    | 266.1    | 27.3        | 1.10259301  | 0.5325   | -1.104 |
| 99015_at   | 352.5  | 327.1  | 466.7  | 511.2  | 321.9  | 313.8  | 473.9  | 349.7  | 0.425385582 | 414.375  | 364.825  | 49.55       | 1.135818543 | 0.4202   | -1.132 |
| 99016_at   | 123.6  | 109.2  | 99.4   | 151.1  | 96.5   | 200.5  | 124.5  | 126.4  | 0.549135402 | 120.825  | 136.975  | 16.15       | 0.882095273 | 0.5865   | 1.107  |
| 99018_at   | 85.5   | 91.8   | 146.7  | 121.7  | 61     | 97.5   | 201    | 138.5  | 0.712474757 | 111.425  | 124.5    | 13.075      | 0.89497992  | 0.8875   | 1.043  |
| 99019_at   | 365.5  | 359.6  | 399.8  | 414.7  | 363.1  | 392.2  | 301.1  | 416.7  | 0.584120154 | 384.9    | 368.275  | 16.625      | 1.045142896 | 0.5515   | -1.051 |
| 99020_at   | 30.6   | 33.6   | 38.3   | 29.4   | 28.4   | 22.8   | 39.9   | 30     | 0.53872352  | 32.975   | 30.275   | 2.7         | 1.089182494 | 0.4633   | -1.106 |
| 99021_at   | 34.9   | 48.5   | 57.9   | 68.8   | 42.7   | 79.7   | 69.2   | 74.2   | 0.249702869 | 52.525   | 66.45    | 13.925      | 0.790443943 | 0.284    | 1.269  |



|            |        |        |        |        |        |        |        |        |             |          |          |         |             |          |        |
|------------|--------|--------|--------|--------|--------|--------|--------|--------|-------------|----------|----------|---------|-------------|----------|--------|
| 99023_at   | 628.8  | 710.1  | 850.3  | 813.8  | 558.9  | 570.4  | 996.4  | 742.7  | 0.781117997 | 750.75   | 717.1    | 33.65   | 1.046925115 | 0.6724   | -1.07  |
| 99024_at   | 1361.3 | 1795.8 | 1392.2 | 1038.8 | 1870.1 | 1587.7 | 1174.5 | 1175   | 0.819783534 | 1397.025 | 1451.825 | 54.8    | 0.962254404 | 0.8263   | 1.038  |
| 99025_at   | 409.3  | 509.6  | 768.6  | 778.1  | 547    | 453.1  | 523    | 653.1  | 0.514971164 | 616.4    | 544.05   | 72.35   | 1.132984101 | 0.6008   | -1.102 |
| 99026_at   | 7.3    | 24.7   | 7.7    | 11.8   | 5.9    | 8.8    | 8      | 9.9    | 0.332372459 | 12.875   | 8.15     | 4.725   | 1.579754601 | 0.3002   | -1.409 |
| 99027_at   | 1012.8 | 956.5  | 1080.4 | 1104.1 | 1082   | 1041.9 | 938.9  | 1007.9 | 0.661820355 | 1038.45  | 1017.675 | 20.775  | 1.020414179 | 0.6679   | -1.02  |
| 99028_at   | 889.5  | 725.7  | 743.8  | 632.7  | 793.6  | 744.1  | 635.8  | 693.8  | 0.641895047 | 747.925  | 716.825  | 31.1    | 1.043385764 | 0.665    | -1.039 |
| 99029_at   | 435.8  | 473.8  | 457.9  | 421.3  | 623.6  | 481.5  | 386.7  | 447.9  | 0.512507897 | 447.2    | 484.925  | 37.725  | 0.922204465 | 0.5423   | 1.069  |
| 99030_at   | 55.7   | 33.8   | 25.5   | 29     | 21.2   | 62.8   | 32.6   | 33.4   | 0.897913017 | 36       | 37.5     | 1.5     | 0.96        | 0.9724   | 1.01   |
| 99031_at   | 288    | 268.5  | 471.5  | 564.3  | 369    | 275.8  | 566.5  | 468.5  | 0.826328575 | 398.075  | 419.95   | 21.875  | 0.947910466 | 0.7862   | 1.07   |
| 99032_at   | 217.4  | 273.3  | 298.1  | 435.5  | 474.1  | 175.1  | 405.6  | 475.2  | 0.407525207 | 306.075  | 382.5    | 76.425  | 0.800196078 | 0.5381   | 1.2    |
| 99033_at   | 801.7  | 782.5  | 850.7  | 897.7  | 728.7  | 642.4  | 658.1  | 654.1  | 0.002994615 | 833.15   | 670.825  | 162.325 | 1.241978161 | 0.002106 | -1.242 |
| 99034_at   | 94.9   | 82.7   | 70.1   | 91.5   | 79.8   | 102.7  | 95.1   | 91.1   | 0.352689986 | 84.8     | 92.175   | 7.375   | 0.919989151 | 0.357    | 1.089  |
| 99035_at   | 176.5  | 130.4  | 200.9  | 215    | 79.1   | 179.3  | 283.3  | 211.2  | 0.87848452  | 180.7    | 188.225  | 7.525   | 0.960021251 | 0.8981   | -1.04  |
| 99036_s_at | 110.6  | 43.2   | 84.4   | 102.5  | 53.3   | 89.7   | 66.1   | 60.1   | 0.3452121   | 85.175   | 67.3     | 17.875  | 1.265601783 | 0.4505   | -1.215 |
| 99037_at   | 23.7   | 16.7   | 10.7   | 10.1   | 16     | 17.8   | 12.5   | 17.1   | 0.879103294 | 15.3     | 15.85    | 0.55    | 0.965299685 | 0.6939   | 1.093  |
| 99038_at   | 1585.4 | 1485.5 | 1316.8 | 1163.7 | 1152.7 | 1800.2 | 1311.1 | 1260.4 | 0.97000996  | 1387.85  | 1381.1   | 6.75    | 1.004887409 | 0.9177   | -1.013 |
| 99039_g_at | 1963.6 | 1970   | 2242.7 | 1828.5 | 1901.3 | 2224.1 | 2452.8 | 2218.2 | 0.218158656 | 2001.2   | 2199.1   | 197.9   | 0.91000864  | 0.2187   | 1.097  |
| 99040_at   | 14     | 52.5   | 42.3   | 18.2   | 54.1   | 66.8   | 13.6   | 41.3   | 0.439594186 | 31.75    | 43.95    | 12.2    | 0.722411832 | 0.53     | 1.375  |
| 99041_at   | 565.9  | 659.6  | 557.5  | 495.9  | 613    | 759.7  | 542.4  | 580.6  | 0.391998814 | 569.725  | 623.925  | 54.2    | 0.913130585 | 0.3832   | 1.092  |
| 99042_s_at | 90.8   | 48.9   | 78.6   | 85.9   | 82.2   | 107.3  | 67.4   | 63.1   | 0.782856445 | 76.05    | 80       | 3.95    | 0.950625    | 0.7721   | 1.058  |
| 99043_s_at | 14.4   | 10.2   | 10.3   | 9.7    | 8.5    | 15.3   | 10.9   | 10.1   | 0.979025895 | 11.15    | 11.2     | 0.05    | 0.995535714 | 0.9629   | -1.007 |
| 99044_at   | 426.9  | 393.1  | 535.8  | 295.9  | 328.3  | 521.2  | 405.6  | 344.1  | 0.849167986 | 412.925  | 399.8    | 13.125  | 1.032828914 | 0.872    | -1.027 |
| 99045_at   | 116.5  | 94.3   | 65     | 102.9  | 80.5   | 118.1  | 87.7   | 100.2  | 0.891477053 | 94.675   | 96.625   | 1.95    | 0.979818887 | 0.8372   | 1.033  |
| 99046_at   | 1.7    | 2.6    | 0.7    | 6.6    | 2.6    | 4.2    | 0.5    | 6.1    | 0.806435032 | 2.9      | 3.35     | 0.45    | 0.865671642 | 0.8607   | 1.14   |
| 99047_at   | 32.6   | 14.9   | 17.8   | 16.1   | 65.9   | 56     | 21.5   | 16.1   | 0.215466251 | 20.35    | 39.875   | 19.525  | 0.510344828 | 0.2055   | 1.741  |
| 99048_g_at | 11.1   | 13.3   | 3.1    | 5.1    | 6.7    | 12.1   | 7.5    | 8.9    | 0.820169202 | 8.15     | 8.8      | 0.65    | 0.926136364 | 0.5832   | 1.236  |
| 99049_at   | 1577.5 | 1305.1 | 1562.7 | 1221.7 | 1284.6 | 1564   | 1434.7 | 1118   | 0.632525991 | 1416.75  | 1350.325 | 66.425  | 1.049191861 | 0.6268   | -1.051 |
| 99050_at   | 113.6  | 74.3   | 64.4   | 90.9   | 61.1   | 78.1   | 123.1  | 73     | 0.913099286 | 85.8     | 83.825   | 1.975   | 1.02356099  | 0.8606   | -1.036 |
| 99051_at   | 108.8  | 130.9  | 94.7   | 106.9  | 91.8   | 147.6  | 125.9  | 95.9   | 0.757023906 | 110.325  | 115.3    | 4.975   | 0.956851691 | 0.8203   | 1.032  |
| 99052_at   | 1977.8 | 1849.5 | 1830.7 | 1625.8 | 1627.1 | 1664.9 | 1797.1 | 1706.4 | 0.201643274 | 1820.95  | 1698.875 | 122.075 | 1.071856376 | 0.1916   | -1.07  |
| 99053_at   | 93.4   | 95     | 95.3   | 68.4   | 98.9   | 92.2   | 92.2   | 122    | 0.217226547 | 88.025   | 101.325  | 13.3    | 0.868739206 | 0.2209   | 1.154  |
| 99054_at   | 1307.7 | 965.2  | 1470.9 | 1679.2 | 1202.7 | 1397   | 1468.6 | 1515.2 | 0.820054912 | 1355.75  | 1395.875 | 40.125  | 0.971254589 | 0.7364   | 1.046  |
| 99055_at   | 113.9  | 99.6   | 105.6  | 95.9   | 105.5  | 122.2  | 132.6  | 132.4  | 0.048624589 | 103.75   | 123.175  | 19.425  | 0.842297544 | 0.04186  | 1.184  |
| 99056_at   | 264.8  | 265.4  | 298.9  | 208.5  | 134.4  | 163.9  | 115.2  | 137    | 0.003001958 | 259.4    | 137.625  | 121.775 | 1.884831971 | 0.000908 | -1.885 |
| 99057_at   | 71.6   | 168.3  | 103.5  | 152.7  | 173.4  | 200.7  | 74.5   | 163.8  | 0.442429193 | 124.025  | 153.1    | 29.075  | 0.810091444 | 0.5244   | 1.222  |
| 99058_at   | 8.2    | 55     | 33.4   | 73.2   | 38.6   | 85.8   | 53.9   | 64     | 0.335836201 | 42.45    | 60.575   | 18.125  | 0.700784152 | 0.2984   | 1.794  |
| 99059_at   | 322.4  | 287.2  | 285.6  | 370.1  | 298.8  | 418    | 353.4  | 334.8  | 0.317471187 | 316.325  | 351.25   | 34.925  | 0.900569395 | 0.31     | 1.108  |
| 99062_at   | 95.7   | 93.7   | 75.6   | 67     | 58.1   | 91.4   | 79.7   | 89.1   | 0.751364782 | 83       | 79.575   | 3.425   | 1.043041156 | 0.741    | -1.048 |
| 99063_at   | 209.3  | 219.9  | 156.7  | 167.8  | 211.2  | 175.1  | 179.3  | 151.8  | 0.661848176 | 188.425  | 179.35   | 9.075   | 1.050599387 | 0.6827   | -1.047 |
| 99064_at   | 1089.6 | 1265.9 | 1135.5 | 1080.1 | 1217.6 | 1407.8 | 1137.4 | 1167.5 | 0.276958437 | 1142.775 | 1232.575 | 89.8    | 0.927144393 | 0.262    | 1.077  |
| 99065_at   | 85.9   | 66.6   | 42.4   | 34.2   | 35.5   | 119.8  | 48.9   | 30.7   | 0.953946567 | 57.275   | 58.725   | 1.45    | 0.975308642 | 0.8654   | -1.068 |
| 99067_at   | 1749.5 | 1755.5 | 2264.2 | 1901.5 | 1389.4 | 1370.2 | 1468.1 | 1759.4 | 0.034138133 | 1917.675 | 1496.775 | 420.9   | 1.28120459  | 0.02517  | -1.281 |
| 99068_at   | 776.5  | 807.3  | 939.3  | 1178.7 | 878    | 732.7  | 960.1  | 845.4  | 0.522083289 | 925.45   | 854.05   | 71.4    | 1.083601663 | 0.5417   | -1.074 |
| 99069_at   | 10.5   | 12.2   | 7.6    | 21.6   | 7      | 13.6   | 12     | 6.6    | 0.407878617 | 12.975   | 9.8      | 3.175   | 1.323979592 | 0.4081   | -1.289 |
| 99070_at   | 588.4  | 593.4  | 747.6  | 686.2  | 710.6  | 923.8  | 705.7  | 769.9  | 0.104460288 | 653.9    | 777.5    | 123.6   | 0.841028939 | 0.09104  | 1.188  |
| 99071_at   | 314.9  | 289.6  | 303    | 285.9  | 278.3  | 512.1  | 210.9  | 311.6  | 0.676955875 | 298.35   | 328.225  | 29.875  | 0.90898012  | 0.8273   | 1.043  |
| 99073_at   | 655    | 518.7  | 622    | 664.7  | 527.7  | 491.5  | 617.1  | 650.9  | 0.420840945 | 615.1    | 571.8    | 43.3    | 1.075725778 | 0.4238   | -1.078 |
| 99074_at   | 4.2    | 31.8   | 37.2   | 35.7   | 75.4   | 33.9   | 4.7    | 46.1   | 0.478003461 | 27.225   | 40.025   | 12.8    | 0.680199875 | 0.7372   | 1.327  |
| 99076_at   | 367.6  | 278.8  | 390.5  | 394.8  | 232.2  | 284.7  | 349.5  | 315.4  | 0.140418954 | 357.925  | 295.45   | 62.475  | 1.211457099 | 0.1567   | -1.213 |
| 99077_at   | 286.6  | 267.7  | 318.4  | 313.1  | 242.2  | 253.8  | 239.9  | 247.6  | 0.020016322 | 296.45   | 245.875  | 50.575  | 1.20569395  | 0.004767 | -1.203 |
| 99078_at   | 607.3  | 530.5  | 563.3  | 457.7  | 490.7  | 443.7  | 395.8  | 415.9  | 0.039425701 | 539.7    | 436.525  | 103.175 | 1.236355306 | 0.03235  | -1.234 |
| 99080_at   | 386.4  | 426    | 509.9  | 507.6  | 441    | 414.4  | 481    | 438.4  | 0.702460068 | 457.475  | 443.7    | 13.775  | 1.031045752 | 0.7491   | -1.025 |
| 99081_at   | 2013.1 | 2249.4 | 1721.9 | 1681.3 | 2207.4 | 2119.7 | 2052.1 | 1992.2 | 0.284271069 | 1916.425 | 2092.85  | 176.425 | 0.915701077 | 0.2375   | 1.099  |
| 99082_at   | 1102.7 | 1142.6 | 1504.4 | 1461   | 1208   | 1215.7 | 1558.9 | 1635.7 | 0.531701032 | 1302.675 | 1404.575 | 101.9   | 0.927451364 | 0.5326   | 1.078  |
| 99083_at   | 76.4   | 34.1   | 17.4   | 45.8   | 53.5   | 22.5   | 86.5   | 78.5   | 0.411563546 | 43.425   | 60.25    | 16.825  | 0.720746888 | 0.4623   | 1.407  |
| 99084_s_at | 1749.9 | 1525   | 1542.2 | 1535.1 | 1764.3 | 1819.6 | 1487.1 | 1648.5 | 0.35628392  | 1588.05  | 1679.875 | 91.825  | 0.945338195 | 0.3609   | 1.056  |



|            |         |         |         |         |         |         |         |         |             |           |          |          |             |         |        |
|------------|---------|---------|---------|---------|---------|---------|---------|---------|-------------|-----------|----------|----------|-------------|---------|--------|
| 99085_at   | 881.5   | 822.7   | 922.4   | 927     | 666.2   | 612.4   | 885.3   | 919     | 0.226322824 | 888.4     | 770.725  | 117.675  | 1.152680917 | 0.1878  | -1.169 |
| 99086_g_at | 570.6   | 641.5   | 432.3   | 671     | 517.2   | 613.6   | 512.3   | 601.9   | 0.781207789 | 578.85    | 561.25   | 17.6     | 1.031358575 | 0.8587  | -1.021 |
| 99087_at   | 4479.9  | 3815.9  | 3471.6  | 2765.5  | 3454.4  | 4625.4  | 3391.6  | 3160.2  | 0.961104956 | 3633.225  | 3657.9   | 24.675   | 0.993254326 | 0.9381  | -1.011 |
| 99089_at   | 93.3    | 84.3    | 95.8    | 71.7    | 96.5    | 135.8   | 95.1    | 53.9    | 0.636590289 | 86.275    | 95.325   | 9.05     | 0.905061631 | 0.7979  | 1.056  |
| 99093_at   | 18265.1 | 21183.3 | 12202.3 | 12424.4 | 15635.7 | 14421.7 | 12756.4 | 12872.6 | 0.423722384 | 16018.775 | 13921.6  | 2097.175 | 1.150641808 | 0.4634  | -1.122 |
| 99094_at   | 34.3    | 22      | 21.1    | 44.3    | 31.3    | 57.3    | 18.7    | 14.9    | 0.991434957 | 30.425    | 30.55    | 0.125    | 0.995908347 | 0.8143  | -1.089 |
| 99095_at   | 607.2   | 667.8   | 884.9   | 1021.3  | 761     | 650.3   | 1115.1  | 1027.3  | 0.546414139 | 795.3     | 888.425  | 93.125   | 0.895179672 | 0.5559  | 1.115  |
| 99096_at   | 790.3   | 815.3   | 605.7   | 681.3   | 952.7   | 706     | 749.4   | 775.1   | 0.357986319 | 723.15    | 795.8    | 72.65    | 0.908708218 | 0.3492  | 1.101  |
| 99097_at   | 64.1    | 51.2    | 87.2    | 64.2    | 83.2    | 85      | 75.5    | 55.1    | 0.45955042  | 66.675    | 74.7     | 8.025    | 0.892570281 | 0.4577  | 1.125  |
| 99098_at   | 4958.3  | 4189.7  | 3183.5  | 2689.2  | 3625.7  | 4973.5  | 3455    | 3666.5  | 0.78755811  | 3755.175  | 3930.175 | 175      | 0.955472721 | 0.7095  | 1.065  |
| 99099_at   | 593.9   | 543.2   | 704.2   | 696.1   | 499.7   | 673.4   | 605     | 695.6   | 0.796656026 | 634.35    | 618.425  | 15.925   | 1.025750899 | 0.7873  | -1.028 |
| 99100_at   | 415.8   | 389.5   | 452.6   | 368.1   | 361.8   | 375.7   | 351.6   | 396.8   | 0.155906629 | 406.5     | 371.475  | 35.025   | 1.094286291 | 0.1381  | -1.092 |
| 99101_at   | 3855.2  | 3442.7  | 3071.5  | 2746.3  | 3391.7  | 3088.8  | 2728.5  | 3063.1  | 0.479189596 | 3278.925  | 3068.025 | 210.9    | 1.068741291 | 0.4994  | -1.063 |
| 99102_at   | 210.4   | 211.2   | 288.2   | 275.2   | 213.9   | 218.5   | 378     | 326.2   | 0.44800039  | 246.25    | 284.15   | 37.9     | 0.866619743 | 0.4875  | 1.131  |
| 99103_at   | 535.1   | 532.1   | 431.2   | 409.6   | 517.5   | 527.8   | 380.5   | 424.2   | 0.776283751 | 477       | 462.5    | 14.5     | 1.031351351 | 0.7654  | 1.034  |
| 99104_at   | 46.5    | 38.1    | 29.4    | 41.1    | 37.1    | 44      | 17.7    | 38.4    | 0.5368851   | 38.775    | 34.3     | 4.475    | 1.130466472 | 0.4956  | -1.18  |
| 99106_at   | 2969.4  | 3158.8  | 2527    | 2491.1  | 2607.1  | 2609.8  | 2810.5  | 2616.2  | 0.511178708 | 2786.575  | 2660.9   | 125.675  | 1.04723026  | 0.5273  | -1.042 |
| 99107_at   | 247.4   | 253.5   | 264.1   | 256.8   | 154.5   | 300.4   | 355.2   | 274.9   | 0.734534589 | 255.45    | 271.25   | 15.8     | 0.941751152 | 0.9335  | 1.016  |
| 99108_s_at | 175.1   | 192.6   | 163.3   | 179.1   | 171.3   | 126.1   | 215.9   | 210.5   | 0.883092874 | 177.525   | 180.95   | 3.425    | 0.981072119 | 0.9908  | 1.002  |
| 99109_at   | 725.5   | 741.7   | 1061.7  | 1067.9  | 717.7   | 673.4   | 731.1   | 701.6   | 0.135925736 | 899.2     | 705.95   | 193.25   | 1.273744599 | 0.08472 | -1.253 |
| 99111_at   | 334.9   | 274.9   | 302.7   | 384.3   | 316.9   | 340.6   | 406.1   | 345.1   | 0.391720697 | 324.2     | 352.175  | 27.975   | 0.92056506  | 0.3681  | 1.09   |
| 99112_at   | 416.1   | 285.1   | 405.3   | 433.9   | 271.6   | 325.2   | 391.6   | 365.6   | 0.320315192 | 385.1     | 338.5    | 46.6     | 1.137666174 | 0.3577  | -1.133 |
| 99113_at   | 1687.5  | 2058    | 1395.8  | 1517.8  | 2252.3  | 1522.7  | 1568.2  | 1592.4  | 0.76983617  | 1664.775  | 1733.9   | 69.125   | 0.960133226 | 0.7708  | 1.039  |
| 99114_r_at | 220     | 167.1   | 103.3   | 164.8   | 170.3   | 295.5   | 127.9   | 135.5   | 0.701722277 | 163.8     | 182.3    | 18.5     | 0.898518925 | 0.7486  | 1.086  |
| 99115_at   | 5332.7  | 6521    | 4225    | 4021.6  | 5655.6  | 4892.5  | 4185.5  | 4507.7  | 0.757996175 | 5025.075  | 4810.325 | 214.75   | 1.044643553 | 0.8182  | -1.031 |
| 99118_at   | 28.3    | 4.5     | 5.7     | 4.2     | 5       | 26.1    | 15.4    | 16.2    | 0.520858343 | 10.675    | 15.675   | 5        | 0.681020734 | 0.3383  | 1.811  |
| 99119_at   | 7515.8  | 7631.5  | 6401.5  | 5197.8  | 5729.4  | 7606.3  | 6860.7  | 5960.3  | 0.843593159 | 6686.65   | 6539.175 | 147.475  | 1.022552539 | 0.8819  | -1.017 |
| 99120_f_at | 2965.3  | 3684.2  | 4037.2  | 4877    | 3109.8  | 2251.9  | 4420.9  | 4861.7  | 0.761602223 | 3890.925  | 3661.075 | 229.85   | 1.062782106 | 0.677   | -1.093 |
| 99121_at   | 168.1   | 194.7   | 199.2   | 217.6   | 223.4   | 197.1   | 172.4   | 207.5   | 0.737240643 | 194.9     | 200.1    | 5.2      | 0.974012994 | 0.7463  | 1.026  |
| 99123_s_at | 1078.8  | 1311    | 931.8   | 747.1   | 1164    | 752     | 895.6   | 911.5   | 0.579528539 | 1017.175  | 930.775  | 86.4     | 1.092825871 | 0.6095  | -1.083 |
| 99124_at   | 101.9   | 168.4   | 114.4   | 138.1   | 109.8   | 151.1   | 107.1   | 172.8   | 0.842933862 | 130.7     | 135.2    | 4.5      | 0.966715976 | 0.8545  | 1.031  |
| 99126_at   | 29      | 26.5    | 27.8    | 36.8    | 16.3    | 24      | 43.4    | 57.2    | 0.620646374 | 30.025    | 35.225   | 5.2      | 0.852377573 | 0.8648  | 1.054  |
| 99127_at   | 4453.2  | 4548.4  | 4460.2  | 3910.3  | 4385.8  | 4538.5  | 4815.3  | 4357.9  | 0.355348719 | 4343.025  | 4524.375 | 181.35   | 0.959917116 | 0.3526  | 1.043  |
| 99128_at   | 5146.9  | 5563.2  | 3822.1  | 3114.3  | 4689    | 4333.8  | 3445.4  | 3264    | 0.504721381 | 4411.625  | 3933.05  | 478.575  | 1.121680375 | 0.5561  | -1.105 |
| 99129_at   | 738.8   | 867.7   | 869.5   | 655.8   | 1100.6  | 667     | 727.9   | 853.9   | 0.641392574 | 782.95    | 837.35   | 54.4     | 0.93503314  | 0.6838  | 1.057  |
| 99130_at   | 38.5    | 13.8    | 20.7    | 16.2    | 4.9     | 30.3    | 28.8    | 29.3    | 0.905874697 | 22.3      | 23.325   | 1.025    | 0.956055734 | 0.8677  | -1.091 |
| 99133_at   | 2987.4  | 3161.7  | 4188.5  | 3946.8  | 2615.4  | 2095.2  | 2974.2  | 2757.6  | 0.038895903 | 3571.1    | 2610.6   | 960.5    | 1.367923083 | 0.03175 | -1.365 |
| 99134_at   | 125.6   | 150.7   | 130     | 87.1    | 163.9   | 153.6   | 101.9   | 123.1   | 0.550855633 | 123.35    | 135.625  | 12.275   | 0.909493088 | 0.5641  | 1.102  |
| 99135_at   | 2651.3  | 2411.4  | 1952.7  | 1532.9  | 2122.2  | 2186.4  | 1722.8  | 1719.7  | 0.509505088 | 2137.075  | 1937.775 | 199.3    | 1.102849918 | 0.5707  | -1.086 |
| 99136_at   | 113.3   | 59.5    | 62.8    | 19.3    | 69.1    | 85.7    | 67.5    | 123.7   | 0.3704213   | 63.725    | 86.5     | 22.775   | 0.736705202 | 0.2983  | 1.569  |
| 99138_at   | 363.1   | 257     | 398.2   | 372.6   | 229.5   | 308.1   | 380.6   | 306.7   | 0.380309382 | 347.725   | 306.225  | 41.5     | 1.135521267 | 0.4006  | -1.138 |
| 99139_at   | 495.6   | 411.1   | 690.3   | 880.4   | 548.3   | 362.2   | 723.2   | 778.5   | 0.911692579 | 619.35    | 603.05   | 16.3     | 1.027029268 | 0.9196  | -1.026 |
| 99140_at   | 749.1   | 885.5   | 785.6   | 756.2   | 1071.3  | 794.7   | 815.9   | 758.9   | 0.443000175 | 794.1     | 860.2    | 66.1     | 0.923157405 | 0.434   | 1.075  |
| 99141_at   | 1843.5  | 2117.3  | 1693.7  | 1495.6  | 1692.5  | 1309.7  | 1312.8  | 1091.8  | 0.052765849 | 1787.525  | 1351.7   | 435.825  | 1.322427314 | 0.04996 | -1.328 |
| 99142_at   | 647     | 498.4   | 606.6   | 534.4   | 408.7   | 548.2   | 460.2   | 345.6   | 0.055427272 | 571.6     | 440.675  | 130.925  | 1.297101038 | 0.05599 | -1.309 |
| 99143_at   | 1105.3  | 1404.9  | 1260    | 1248.4  | 1438.8  | 1481.4  | 1553.7  | 1159.8  | 0.201217136 | 1254.65   | 1408.425 | 153.775  | 0.890817757 | 0.2127  | 1.12   |
| 99144_s_at | 354.8   | 320.2   | 378.6   | 331.7   | 264.9   | 387     | 518.3   | 377.9   | 0.495867601 | 346.325   | 387.025  | 40.7     | 0.894838835 | 0.5705  | 1.089  |
| 99146_at   | 324     | 316.2   | 397     | 352.9   | 316.7   | 380.1   | 371.6   | 370.6   | 0.62013955  | 347.525   | 359.75   | 12.225   | 0.966018068 | 0.6074  | 1.037  |
| 99147_at   | 1299.2  | 1441.4  | 1052.5  | 934.6   | 1192.1  | 1351.6  | 938.8   | 964     | 0.65898041  | 1181.925  | 1111.625 | 70.3     | 1.063240751 | 0.6722  | -1.06  |
| 99148_at   | 2106.9  | 1893.5  | 1708.7  | 1457.7  | 1902.2  | 1896.5  | 1804.3  | 1721.7  | 0.799610651 | 1791.7    | 1831.175 | 39.475   | 0.978442803 | 0.7261  | 1.031  |
| 99149_at   | 918.9   | 897.4   | 1256.1  | 1460.7  | 758.6   | 603.2   | 963.2   | 883.4   | 0.092000112 | 1133.275  | 802.1    | 331.175  | 1.412884927 | 0.0747  | -1.404 |
| 99150_at   | 641.2   | 866.9   | 584.9   | 560.2   | 813.8   | 550     | 573.6   | 530.4   | 0.647448611 | 663.3     | 616.95   | 46.35    | 1.075127644 | 0.6205  | -1.075 |
| 99151_at   | 995.4   | 767.8   | 717     | 718.3   | 789.8   | 897.8   | 927.2   | 808.6   | 0.487373122 | 799.625   | 855.85   | 56.225   | 0.934305077 | 0.4213  | 1.078  |
| 99152_at   | 121.4   | 204.4   | 245     | 288.6   | 99.3    | 53.9    | 312.4   | 232.2   | 0.586038833 | 214.85    | 174.45   | 40.4     | 1.231584981 | 0.4274  | -1.458 |
| 99153_at   | 488.3   | 647.9   | 480.1   | 378     | 634.9   | 440.5   | 432.9   | 426.1   | 0.848848253 | 498.575   | 483.6    | 14.975   | 1.030965674 | 0.8606  | -1.027 |
| 99154_s_at | 784     | 729.3   | 617.9   | 561.2   | 664.9   | 676.7   | 599.8   | 551     | 0.434939292 | 673.1     | 623.1    | 50       | 1.080243942 | 0.4547  | -1.075 |



|            |         |         |         |         |         |         |         |         |             |           |           |         |             |          |        |
|------------|---------|---------|---------|---------|---------|---------|---------|---------|-------------|-----------|-----------|---------|-------------|----------|--------|
| 99156_at   | 966.9   | 880.6   | 646.1   | 644.1   | 693.4   | 677.5   | 720.2   | 611.9   | 0.28233373  | 784.425   | 675.75    | 108.675 | 1.16082131  | 0.2704   | -1.144 |
| 99157_at   | 554.4   | 619.8   | 438.2   | 379.6   | 484     | 528.5   | 423.9   | 380     | 0.520879528 | 498       | 454.1     | 43.9    | 1.096674741 | 0.5598   | -1.085 |
| 99158_at   | 319.1   | 340.8   | 435.4   | 388.2   | 508.9   | 380.8   | 436.2   | 444.9   | 0.099310505 | 370.875   | 442.7     | 71.825  | 0.837756946 | 0.0972   | 1.196  |
| 99159_at   | 209.1   | 195.5   | 304.3   | 226.9   | 348.7   | 349.5   | 242.5   | 231.9   | 0.197754966 | 233.95    | 293.15    | 59.2    | 0.798055603 | 0.1859   | 1.248  |
| 99160_s_at | 581.2   | 599     | 923.9   | 668.1   | 515     | 635.4   | 775.8   | 739.3   | 0.796371269 | 693.05    | 666.375   | 26.675  | 1.040030013 | 0.8175   | -1.034 |
| 99161_at   | 1345.7  | 1317.1  | 1752.6  | 1474.4  | 1512.1  | 1449    | 1310.9  | 1530.4  | 0.852935031 | 1472.45   | 1450.6    | 21.85   | 1.015062733 | 0.8939   | 1.01   |
| 99162_at   | 623.9   | 773.6   | 1066.1  | 1149.8  | 840.6   | 796.3   | 906.6   | 923.6   | 0.789810074 | 903.35    | 866.775   | 36.575  | 1.042196648 | 0.9294   | 1.014  |
| 99163_at   | 371.8   | 420.2   | 742.2   | 396.4   | 303.5   | 384.6   | 439.9   | 430.1   | 0.374322042 | 482.65    | 389.525   | 93.125  | 1.23907323  | 0.349    | -1.201 |
| 99164_at   | 903.2   | 981.1   | 731     | 841.4   | 875.9   | 834.6   | 914.8   | 868.8   | 0.874855349 | 864.175   | 873.525   | 9.35    | 0.989296242 | 0.8146   | 1.016  |
| 99166_at   | 2264    | 2794.1  | 1663.1  | 1159.7  | 1954.4  | 1496.9  | 1138.1  | 1268.4  | 0.266547695 | 1970.225  | 1464.45   | 505.775 | 1.345368568 | 0.2825   | -1.304 |
| 99167_at   | 1220    | 1128    | 903.1   | 1047.2  | 1238.5  | 1430.5  | 1049    | 1002.8  | 0.411759558 | 1074.575  | 1180.2    | 105.625 | 0.910502457 | 0.419    | 1.094  |
| 99168_at   | 541.6   | 457.5   | 690.7   | 742.2   | 423.2   | 522.8   | 604.9   | 623.9   | 0.456407251 | 608       | 543.7     | 64.3    | 1.118263748 | 0.489    | -1.111 |
| 99169_at   | 396.5   | 342.1   | 544.6   | 567.6   | 372.1   | 424.7   | 399.5   | 448.4   | 0.428193302 | 462.7     | 411.175   | 51.525  | 1.125311607 | 0.4765   | -1.103 |
| 99171_at   | 104.1   | 50.7    | 64.7    | 91.3    | 70.5    | 130.1   | 86.4    | 64.5    | 0.615459511 | 77.7      | 87.875    | 10.175  | 0.884210526 | 0.6035   | 1.132  |
| 99172_at   | 33.8    | 6.4     | 32.9    | 54.6    | 27.7    | 36      | 55.3    | 15.7    | 0.896780838 | 31.925    | 33.675    | 1.75    | 0.948032665 | 0.7249   | 1.219  |
| 99175_at   | 1297    | 1722    | 1504    | 1693.1  | 1629.2  | 1680.9  | 1977.4  | 2066    | 0.099810289 | 1554.025  | 1838.375  | 284.35  | 0.845325355 | 0.103    | 1.184  |
| 99176_at   | 1089    | 1062.8  | 872.1   | 711.9   | 919.7   | 993.3   | 746.6   | 780.4   | 0.514651807 | 933.95    | 860       | 73.95   | 1.085988372 | 0.5541   | -1.078 |
| 99178_at   | 344.3   | 368.4   | 616.1   | 531.2   | 537.1   | 320.9   | 523     | 545.6   | 0.85065532  | 465       | 481.65    | 16.65   | 0.96543133  | 0.8311   | 1.043  |
| 99179_at   | 718.7   | 993.6   | 614.8   | 505     | 798.9   | 622.8   | 489.5   | 425     | 0.390348027 | 708.025   | 584.05    | 123.975 | 1.212267785 | 0.376    | -1.21  |
| 99180_at   | 2801.8  | 2610.4  | 2850.1  | 2535.9  | 2994    | 3056.2  | 2792.4  | 2797.7  | 0.083052175 | 2699.55   | 2910.075  | 210.525 | 0.927656504 | 0.08298  | 1.078  |
| 99182_at   | 579.2   | 511.3   | 567     | 481.5   | 454.9   | 466.1   | 475.6   | 458.3   | 0.051635303 | 534.75    | 463.725   | 71.025  | 1.153161896 | 0.02028  | -1.15  |
| 99183_at   | 1472.7  | 1164.8  | 1316.1  | 1333.1  | 1209.6  | 1397.6  | 1336.9  | 1342.2  | 0.998979941 | 1321.675  | 1321.575  | 0.1     | 1.000075667 | 0.9737   | 1.002  |
| 99184_at   | 396     | 443.4   | 419.3   | 478.8   | 489.5   | 445.7   | 456.2   | 448.7   | 0.26586545  | 434.375   | 460.025   | 25.65   | 0.944242161 | 0.2447   | 1.061  |
| 99185_at   | 630     | 614.6   | 418.3   | 406.6   | 585     | 526.3   | 454.8   | 474.2   | 0.918549611 | 517.375   | 510.075   | 7.3     | 1.014311621 | 0.9877   | 1.002  |
| 99186_at   | 1822.1  | 1245.3  | 1624.5  | 1657.3  | 1453.9  | 1661.9  | 1681.7  | 1826.8  | 0.653032861 | 1587.3    | 1656.075  | 68.775  | 0.958471084 | 0.6242   | 1.05   |
| 99187_f_at | 1268.8  | 1760.6  | 895.8   | 828.5   | 1431.9  | 1062.7  | 1042.6  | 1016.8  | 0.841899361 | 1188.425  | 1138.5    | 49.925  | 1.043851559 | 0.9726   | 1.007  |
| 99188_at   | 2711.5  | 3346.5  | 2020.6  | 1767.3  | 2597.4  | 2535.5  | 2070.8  | 2201.7  | 0.786338192 | 2461.475  | 2351.35   | 110.125 | 1.046834797 | 0.9056   | -1.019 |
| 99190_at   | 436.7   | 370.2   | 356.7   | 371.2   | 373.7   | 305.9   | 396.9   | 392     | 0.571287252 | 383.7     | 367.125   | 16.575  | 1.04514811  | 0.5612   | -1.047 |
| 99191_at   | 4969.4  | 5960    | 5810.3  | 6146.7  | 5531.4  | 5286.9  | 6661.9  | 6170.6  | 0.654841917 | 5721.6    | 5912.7    | 191.1   | 0.96767974  | 0.6665   | 1.032  |
| 99194_at   | 381.8   | 339.4   | 400.2   | 376.6   | 500.7   | 455.9   | 505.3   | 485.9   | 0.000605359 | 374.5     | 486.95    | 112.45  | 0.7690728   | 0.000746 | 1.301  |
| 99195_at   | 4.8     | 18.9    | 3.6     | 17.9    | 7.5     | 19.3    | 18.3    | 5.7     | 0.805335793 | 11.3      | 12.7      | 1.4     | 0.88976378  | 0.6759   | 1.263  |
| 99196_at   | 2125.9  | 2016.7  | 2306.1  | 1956.5  | 1881.8  | 1948.1  | 2139    | 2125.3  | 0.467534238 | 2101.3    | 2023.55   | 77.75   | 1.038422574 | 0.4678   | -1.038 |
| 99197_at   | 3       | 20.1    | 2.3     | 4.9     | 5.8     | 4.1     | 7.6     | 6.2     | 0.723768308 | 7.575     | 5.925     | 1.65    | 1.278481013 | 0.8107   | 1.132  |
| 99198_at   | 66.2    | 86      | 61.6    | 62.4    | 88.5    | 115.5   | 57.1    | 76.6    | 0.314509241 | 69.05     | 84.425    | 15.375  | 0.817885697 | 0.3241   | 1.196  |
| 99236_at   | 13.3    | 23.8    | 2.9     | 4.1     | 4       | 23.9    | 7.7     | 6.9     | 0.953748227 | 11.025    | 10.625    | 0.4     | 1.037647059 | 0.9069   | 1.078  |
| 99237_at   | 1.1     | 2.4     | 0.5     | 4.3     | 1       | 14.3    | 0.5     | 2.5     | 0.506869515 | 2.075     | 4.575     | 2.5     | 0.453551913 | 0.7437   | 1.335  |
| 99238_at   | 89.2    | 44.2    | 54      | 45      | 63.3    | 43      | 36.6    | 34.4    | 0.319810625 | 58.1      | 44.325    | 13.775  | 1.310772702 | 0.2745   | -1.293 |
| 99239_at   | 119.7   | 42.9    | 86.9    | 62.4    | 78      | 152     | 112.6   | 99.5    | 0.202214652 | 77.975    | 110.525   | 32.55   | 0.705496494 | 0.1837   | 1.478  |
| 99269_g_at | 10.3    | 56.2    | 14.5    | 8.3     | 22.4    | 17.4    | 12.1    | 10.2    | 0.597734546 | 22.325    | 15.525    | 6.8     | 1.438003221 | 0.8457   | -1.099 |
| 99320_at   | 120.6   | 124.2   | 132.6   | 94.1    | 138     | 200.7   | 101.8   | 180.3   | 0.191782534 | 117.875   | 155.2     | 37.325  | 0.759503866 | 0.1894   | 1.284  |
| 99321_at   | 122.9   | 97.9    | 87.8    | 74.9    | 108     | 73.2    | 137.6   | 98.1    | 0.637114733 | 95.875    | 104.225   | 8.35    | 0.919884864 | 0.6714   | 1.077  |
| 99322_at   | 33.2    | 29.9    | 22      | 43.1    | 14.2    | 68.3    | 24.6    | 17      | 0.942771745 | 32.05     | 31.025    | 1.025   | 1.033037873 | 0.6011   | -1.231 |
| 99323_at   | 38.3    | 47.8    | 33.7    | 35.2    | 24.5    | 29.1    | 16      | 8.2     | 0.016754341 | 38.75     | 19.45     | 19.3    | 1.992287918 | 0.03657  | -2.199 |
| 99324_at   | 29.9    | 30.9    | 23.6    | 27.7    | 7.3     | 15.1    | 25.3    | 16.7    | 0.040167369 | 28.025    | 16.1      | 11.925  | 1.74068323  | 0.05271  | -1.899 |
| 99325_at   | 156.5   | 135.5   | 86.1    | 113.2   | 96.9    | 145.6   | 108.6   | 92.2    | 0.558921737 | 122.825   | 110.825   | 12      | 1.108278818 | 0.5845   | -1.1   |
| 99326_at   | 273.8   | 189.5   | 149.2   | 218.9   | 251.2   | 263.2   | 198.7   | 234.2   | 0.378381112 | 207.85    | 236.825   | 28.975  | 0.877652275 | 0.3326   | 1.161  |
| 99327_at   | 204.3   | 261.3   | 173.3   | 194.9   | 246.5   | 288.3   | 143.8   | 208.7   | 0.725263255 | 208.45    | 221.825   | 13.375  | 0.939704722 | 0.8162   | 1.043  |
| 99328_at   | 44.6    | 64.8    | 80.7    | 119.7   | 52.4    | 110.9   | 57.9    | 74.1    | 0.866681616 | 77.45     | 73.825    | 3.625   | 1.049102608 | 0.9204   | -1.028 |
| 99329_at   | 193.6   | 123.7   | 163.8   | 191.2   | 107.1   | 193.2   | 295.2   | 187.9   | 0.542649982 | 168.075   | 195.85    | 27.775  | 0.858182282 | 0.6641   | 1.112  |
| 99330_at   | 187.4   | 136.7   | 177.4   | 231.5   | 125.8   | 166.6   | 152.9   | 204.3   | 0.444220603 | 183.25    | 162.4     | 20.85   | 1.1283867   | 0.453    | -1.126 |
| 99331_at   | 17.8    | 22      | 4.7     | 7.3     | 7.1     | 7.6     | 4.7     | 6.6     | 0.216965895 | 12.95     | 6.5       | 6.45    | 1.992307692 | 0.2277   | -1.674 |
| 99332_at   | 10.3    | 16.9    | 18.6    | 9.8     | 8.1     | 40      | 11      | 7.2     | 0.761943861 | 13.9      | 16.575    | 2.675   | 0.838612368 | 0.9079   | -1.053 |
| 99333_at   | 16.4    | 10.2    | 16.4    | 11      | 5.7     | 21.7    | 11.4    | 20.2    | 0.776942083 | 13.5      | 14.75     | 1.25    | 0.915254237 | 0.9606   | -1.017 |
| 99334_at   | 1.1     | 12.5    | 1.5     | 1.8     | 2.2     | 4.2     | 0.7     | 1.8     | 0.528601255 | 4.225     | 2.225     | 2       | 1.898876404 | 0.678    | -1.333 |
| 99335_at   | 14093.7 | 16042.9 | 11035.1 | 11933.4 | 13837.6 | 12352   | 12490.7 | 11404.6 | 0.571420672 | 13276.275 | 12521.225 | 755.05  | 1.060301608 | 0.6072   | -1.052 |
| 99336_at   | 16250.1 | 17622.1 | 11378.8 | 12705.5 | 14146.2 | 14051.5 | 13549.5 | 14350   | 0.772851307 | 14489.125 | 14024.3   | 464.825 | 1.033144257 | 0.8731   | -1.017 |



|            |         |         |         |         |         |         |         |         |             |         |           |          |             |         |        |
|------------|---------|---------|---------|---------|---------|---------|---------|---------|-------------|---------|-----------|----------|-------------|---------|--------|
| 99337_at   | 116.4   | 76.7    | 98.1    | 89.8    | 90.4    | 82.8    | 102.7   | 76.9    | 0.511106515 | 95.25   | 88.2      | 7.05     | 1.079931973 | 0.5284  | -1.074 |
| 99338_at   | 352.7   | 338.6   | 742.1   | 772.8   | 246.5   | 472.4   | 752.5   | 569     | 0.803144435 | 551.55  | 510.1     | 41.45    | 1.081258577 | 0.8168  | -1.083 |
| 99339_r_at | 32.5    | 31.1    | 23.3    | 45.9    | 52.6    | 23.9    | 28      | 33      | 0.887021126 | 33.2    | 34.375    | 1.175    | 0.965818182 | 0.9366  | 1.018  |
| 99340_at   | 19776.9 | 20962.3 | 13068.5 | 13783.1 | 15411.9 | 16541.2 | 14461.5 | 15538.1 | 0.540833496 | 16897.7 | 15488.175 | 1409.525 | 1.091006526 | 0.6134  | -1.069 |
| 99341_r_at | 9.6     | 3.7     | 6.2     | 5.7     | 5.4     | 4       | 2.1     | 6.3     | 0.275402351 | 6.3     | 4.45      | 1.85     | 1.415730337 | 0.2892  | -1.433 |
| 99342_at   | 13      | 7.9     | 11.8    | 13      | 9.7     | 18.3    | 6.8     | 14.3    | 0.776108007 | 11.425  | 12.275    | 0.85     | 0.930753564 | 0.9245  | 1.025  |
| 99343_at   | 74.2    | 69.8    | 57      | 62.9    | 46.5    | 86.7    | 84.6    | 72.8    | 0.540560494 | 65.975  | 72.65     | 6.675    | 0.908121129 | 0.659   | 1.075  |
| 99344_at   | 13.2    | 11.7    | 9.3     | 3.8     | 8.4     | 11.7    | 10.8    | 3.8     | 0.771864201 | 9.5     | 8.675     | 0.825    | 1.095100865 | 0.8402  | -1.084 |
| 99345_at   | 377.1   | 321.5   | 314.8   | 372.9   | 317.6   | 228.3   | 349.5   | 319.3   | 0.223503135 | 346.575 | 303.675   | 42.9     | 1.141269449 | 0.2272  | -1.152 |
| 99346_at   | 8.3     | 5.1     | 4.8     | 8.6     | 5.4     | 10.4    | 7.2     | 7.4     | 0.557563923 | 6.7     | 7.6       | 0.9      | 0.881578947 | 0.5383  | 1.143  |
| 99347_f_at | 145.4   | 91.9    | 66.7    | 115.7   | 81.7    | 122.5   | 93.7    | 114     | 0.923329679 | 104.925 | 102.975   | 1.95     | 1.018936635 | 0.9642  | 1.009  |
| 99348_r_at | 89.1    | 15.9    | 9.8     | 8.9     | 11.6    | 12.1    | 7.4     | 42      | 0.580001205 | 30.925  | 18.275    | 12.65    | 1.692202462 | 0.7029  | -1.298 |
| 99349_at   | 6.1     | 8.5     | 18.5    | 26      | 18.8    | 32.6    | 22.4    | 11.1    | 0.353456626 | 14.775  | 21.225    | 6.45     | 0.696113074 | 0.305   | 1.57   |
| 99350_at   | 79.4    | 75.4    | 132.2   | 180.4   | 72.2    | 47.8    | 159.2   | 132.6   | 0.711643513 | 116.85  | 102.95    | 13.9     | 1.135016999 | 0.6458  | -1.183 |
| 99351_at   | 28.4    | 35.7    | 19.9    | 33      | 38.3    | 63.4    | 33.7    | 18.5    | 0.408537259 | 29.25   | 38.475    | 9.225    | 0.760233918 | 0.495   | 1.229  |
| 99354_s_at | 19.9    | 26      | 13.9    | 37.2    | 27.5    | 27.2    | 23.8    | 39.3    | 0.424985422 | 24.25   | 29.45     | 5.2      | 0.823429542 | 0.3458  | 1.271  |
| 99355_r_at | 9.6     | 6.1     | 7.2     | 4.1     | 2.9     | 9.5     | 9.6     | 13.3    | 0.438978925 | 6.75    | 8.825     | 2.075    | 0.764872521 | 0.6636  | 1.189  |
| 99356_r_at | 51.2    | 67.8    | 46.1    | 57.7    | 38.1    | 70.8    | 56      | 49.4    | 0.807061085 | 55.7    | 53.575    | 2.125    | 1.039664022 | 0.7382  | -1.055 |
| 99357_at   | 7.7     | 4.9     | 2.9     | 3.1     | 3       | 26.1    | 7.1     | 8.4     | 0.295603619 | 4.65    | 11.15     | 6.5      | 0.417040359 | 0.2358  | 1.922  |
| 99358_at   | 11.1    | 8.3     | 3.1     | 19.3    | 3.5     | 11.1    | 5.8     | 11.7    | 0.565292175 | 10.45   | 8.025     | 2.425    | 1.302180685 | 0.7213  | -1.198 |
| 99359_at   | 18.6    | 6.4     | 5.3     | 5.7     | 4.1     | 26.8    | 5.6     | 8.7     | 0.724137842 | 9       | 11.3      | 2.3      | 0.796460177 | 0.844   | 1.11   |
| 99360_at   | 40.6    | 75.4    | 117.2   | 127.7   | 114.1   | 84.8    | 119.1   | 152.6   | 0.308521171 | 90.225  | 117.65    | 27.425   | 0.766893328 | 0.2881  | 1.4    |
| 99361_at   | 10.3    | 11.4    | 8.9     | 16.1    | 11.8    | 24.5    | 13      | 24.6    | 0.149457804 | 11.675  | 18.475    | 6.8      | 0.631935047 | 0.1189  | 1.534  |
| 99362_at   | 29.7    | 27.9    | 24.6    | 16.2    | 15.3    | 45.4    | 31      | 42.2    | 0.296422563 | 24.6    | 33.475    | 8.875    | 0.734876774 | 0.406   | 1.288  |
| 99363_at   | 19.8    | 3.8     | 4.7     | 17.1    | 2.4     | 3.8     | 5.4     | 13.5    | 0.342175873 | 11.35   | 6.275     | 5.075    | 1.80876494  | 0.3705  | -1.725 |
| 99364_at   | 61.1    | 89      | 153.5   | 173.1   | 128.9   | 95.5    | 101     | 126.5   | 0.83533589  | 119.175 | 112.975   | 6.2      | 1.054879398 | 0.9373  | 1.021  |
| 99365_at   | 438     | 364.8   | 391.7   | 420.5   | 407     | 447.7   | 362.8   | 412.8   | 0.877275923 | 403.75  | 407.575   | 3.825    | 0.990615224 | 0.8835  | 1.009  |
| 99366_at   | 267.8   | 220.6   | 241.7   | 243.3   | 246.5   | 262     | 290.4   | 260.9   | 0.15631301  | 243.35  | 264.95    | 21.6     | 0.918475184 | 0.1527  | 1.089  |
| 99367_at   | 99.4    | 48.1    | 150     | 131.2   | 46      | 65.7    | 264.1   | 158     | 0.655058817 | 107.175 | 133.45    | 26.275   | 0.803109779 | 0.8822  | 1.076  |
| 99368_at   | 19.9    | 16.3    | 15.3    | 10.7    | 13.7    | 17.2    | 15.5    | 23.2    | 0.533431383 | 15.55   | 17.4      | 1.85     | 0.893678161 | 0.5243  | 1.124  |
| 99369_f_at | 6       | 8.7     | 9.4     | 3.2     | 22.9    | 6.9     | 4.3     | 3.8     | 0.60935044  | 6.825   | 9.475     | 2.65     | 0.720316623 | 0.8102  | 1.128  |
| 99370_at   | 142.7   | 110     | 72.8    | 69.7    | 73.3    | 144.8   | 58.5    | 90      | 0.789131854 | 98.8    | 91.65     | 7.15     | 1.078014184 | 0.743   | -1.093 |
| 99371_at   | 55.1    | 94.3    | 46.4    | 95.6    | 43.1    | 37.7    | 50.7    | 82.2    | 0.280637011 | 72.85   | 53.425    | 19.425   | 1.363593823 | 0.269   | -1.358 |
| 99372_at   | 653.5   | 461.4   | 703.4   | 580.7   | 271.9   | 633.3   | 790.8   | 539.7   | 0.751213653 | 599.75  | 558.925   | 40.825   | 1.073042    | 0.6215  | -1.138 |
| 99373_at   | 14.9    | 14.8    | 23.8    | 15.2    | 12.2    | 35.6    | 15      | 12.5    | 0.798723981 | 17.175  | 18.825    | 1.65     | 0.912350598 | 0.9791  | 1.008  |
| 99374_at   | 22.7    | 29.4    | 46.5    | 8.2     | 49.2    | 74.4    | 33.2    | 20.4    | 0.263944155 | 26.7    | 44.3      | 17.6     | 0.602708804 | 0.2626  | 1.764  |
| 99375_at   | 99.7    | 66.1    | 78.9    | 88.7    | 80.1    | 120.7   | 59.7    | 76      | 0.960413358 | 83.35   | 84.125    | 0.775    | 0.990787519 | 0.9428  | 1.013  |
| 99376_at   | 9.8     | 12.2    | 4.9     | 5.2     | 5.5     | 10.6    | 7       | 4.5     | 0.633499399 | 8.025   | 6.9       | 1.125    | 1.163043478 | 0.6806  | -1.135 |
| 99377_at   | 15.2    | 2.7     | 1.2     | 9.7     | 10.6    | 7.5     | 1.1     | 2.4     | 0.665205729 | 7.2     | 5.4       | 1.8      | 1.333333333 | 0.8198  | -1.204 |
| 99378_f_at | 168.2   | 146.6   | 197.3   | 189.3   | 171.5   | 222.2   | 230.5   | 215.9   | 0.094623221 | 175.35  | 210.025   | 34.675   | 0.834900607 | 0.1044  | 1.198  |
| 99379_f_at | 165.6   | 201.1   | 173.7   | 158.9   | 194.2   | 211.4   | 212.9   | 178.9   | 0.093352641 | 174.825 | 199.35    | 24.525   | 0.876975169 | 0.08926 | 1.142  |
| 99380_at   | 59.5    | 49.2    | 37.7    | 79.5    | 40      | 78      | 47.9    | 72.1    | 0.820802272 | 56.475  | 59.5      | 3.025    | 0.949159664 | 0.8309  | 1.051  |
| 99381_at   | 32.2    | 22.8    | 20.4    | 22.7    | 15.9    | 36.9    | 22.9    | 23.3    | 0.966638537 | 24.525  | 24.75     | 0.225    | 0.990909091 | 0.9185  | -1.021 |
| 99382_at   | 158.6   | 64      | 97.6    | 99.9    | 96.9    | 154.4   | 109.6   | 101.1   | 0.676002551 | 105.025 | 115.5     | 10.475   | 0.909307359 | 0.5682  | 1.138  |
| 99383_at   | 67.3    | 9.3     | 41.3    | 44      | 51.6    | 65.2    | 49.1    | 13.1    | 0.801987817 | 40.475  | 44.75     | 4.275    | 0.904469274 | 0.7852  | 1.175  |
| 99384_at   | 136.6   | 102.8   | 127.6   | 145.7   | 75.5    | 104.2   | 155.8   | 167.7   | 0.924574058 | 128.175 | 125.8     | 2.375    | 1.018879173 | 0.7764  | -1.061 |
| 99385_at   | 32.1    | 36.5    | 19.1    | 19.5    | 18.4    | 32      | 85.9    | 24.3    | 0.460514662 | 26.8    | 40.15     | 13.35    | 0.667496887 | 0.5192  | 1.293  |
| 99386_at   | 4.2     | 2       | 2.9     | 2       | 2.7     | 3.4     | 3.4     | 2.6     | 0.680317205 | 2.775   | 3.025     | 0.25     | 0.917355372 | 0.5374  | 1.134  |
| 99387_at   | 20.2    | 57      | 19.4    | 40.8    | 38.9    | 73.2    | 23.9    | 20.1    | 0.768032372 | 34.35   | 39.025    | 4.675    | 0.880204997 | 0.8049  | 1.107  |
| 99388_at   | 128.6   | 96.9    | 150.9   | 174.7   | 73.1    | 163.4   | 94.8    | 98.9    | 0.282664936 | 137.775 | 107.55    | 30.225   | 1.281032078 | 0.2478  | -1.309 |
| 99389_at   | 119.1   | 102.9   | 102.5   | 90.5    | 129.4   | 138.3   | 118.7   | 124.5   | 0.018395988 | 103.75  | 127.725   | 23.975   | 0.812292034 | 0.0171  | 1.236  |
| 99390_at   | 495.4   | 417.5   | 518.9   | 944.2   | 182.1   | 370.2   | 823.3   | 821.5   | 0.832022718 | 594     | 549.275   | 44.725   | 1.081425515 | 0.639   | -1.221 |
| 99391_at   | 84.4    | 50      | 49.6    | 36.1    | 41.7    | 28.2    | 60.5    | 36.6    | 0.330491426 | 55.025  | 41.75     | 13.275   | 1.317964072 | 0.303   | -1.305 |
| 99392_at   | 6.9     | 7.9     | 7.4     | 15.7    | 6.6     | 7.9     | 3.5     | 7.1     | 0.232367516 | 9.475   | 6.275     | 3.2      | 1.509960159 | 0.1824  | -1.486 |
| 99393_at   | 125.7   | 68.5    | 85.1    | 62.9    | 49.4    | 126.6   | 70.3    | 76.6    | 0.831218523 | 85.55   | 80.725    | 4.825    | 1.059770827 | 0.7624  | -1.082 |
| 99394_at   | 57.5    | 42.9    | 47.5    | 30.3    | 59.9    | 78.1    | 95.9    | 30.8    | 0.223385204 | 44.55   | 66.175    | 21.625   | 0.67321496  | 0.2737  | 1.404  |



|            |        |        |        |        |        |        |        |        |             |          |          |         |             |         |        |
|------------|--------|--------|--------|--------|--------|--------|--------|--------|-------------|----------|----------|---------|-------------|---------|--------|
| 99395_at   | 69     | 33     | 4.7    | 7.6    | 8.5    | 20.4   | 12.3   | 18.5   | 0.430152964 | 28.575   | 14.925   | 13.65   | 1.914572864 | 0.7907  | -1.2   |
| 99396_at   | 17.1   | 19.5   | 14     | 17.3   | 12.9   | 40.3   | 13.2   | 14.8   | 0.655536277 | 16.975   | 20.3     | 3.325   | 0.836206897 | 0.8455  | 1.059  |
| 99397_at   | 216.9  | 197.9  | 257.5  | 224.2  | 141.4  | 277.3  | 205.3  | 207    | 0.617839088 | 224.125  | 207.75   | 16.375  | 1.078820698 | 0.529   | -1.104 |
| 99398_at   | 20.3   | 3      | 16.3   | 4.6    | 5.4    | 8.4    | 4.7    | 4.2    | 0.300222797 | 11.05    | 5.675    | 5.375   | 1.947136564 | 0.4385  | -1.503 |
| 99399_at   | 204.4  | 138.3  | 143.2  | 141    | 177    | 262.1  | 149.4  | 155.5  | 0.381917218 | 156.725  | 186      | 29.275  | 0.842607527 | 0.3551  | 1.172  |
| 99400_at   | 13.8   | 5.1    | 6.3    | 9.8    | 2.8    | 33.2   | 2.7    | 15.4   | 0.562491413 | 8.75     | 13.525   | 4.775   | 0.646950092 | 0.9743  | -1.023 |
| 99401_at   | 3.1    | 19     | 2.9    | 20.1   | 3.8    | 17.2   | 9.7    | 14.7   | 0.989877211 | 11.275   | 11.35    | 0.075   | 0.99339207  | 0.7061  | 1.289  |
| 99402_at   | 8.1    | 2.1    | 7.5    | 17.5   | 8.9    | 9.2    | 2.6    | 20.1   | 0.782314317 | 8.8      | 10.2     | 1.4     | 0.862745098 | 0.8096  | 1.166  |
| 99403_at   | 3.5    | 3.9    | 1.5    | 1.3    | 1.1    | 1.6    | 1.4    | 3.7    | 0.527662416 | 2.55     | 1.95     | 0.6     | 1.307692308 | 0.5255  | -1.298 |
| 99404_at   | 33.4   | 18.5   | 4      | 25.2   | 12.4   | 22.3   | 29.7   | 5.6    | 0.746422797 | 20.275   | 17.5     | 2.775   | 1.158571429 | 0.9038  | -1.079 |
| 99405_at   | 76.9   | 51.1   | 56.8   | 48.7   | 42.4   | 102.1  | 59.8   | 56.8   | 0.653700786 | 58.375   | 65.275   | 6.9     | 0.894293374 | 0.7329  | 1.078  |
| 99406_at   | 140.9  | 34.8   | 23.5   | 24.9   | 94.9   | 137.4  | 24.6   | 50     | 0.603809544 | 56.025   | 76.725   | 20.7    | 0.730205279 | 0.4747  | 1.537  |
| 99407_at   | 27.7   | 37.2   | 49.6   | 21.9   | 24     | 33.4   | 66.8   | 20.9   | 0.865073381 | 34.1     | 36.275   | 2.175   | 0.940041351 | 0.999   | 1      |
| 99408_at   | 110.8  | 63.5   | 85.9   | 26.8   | 26.9   | 46.3   | 31.6   | 41.7   | 0.141641902 | 71.75    | 36.625   | 35.125  | 1.959044369 | 0.136   | -1.773 |
| 99409_at   | 64.7   | 100.1  | 51.5   | 246    | 48.4   | 75.4   | 45.4   | 61.2   | 0.28600556  | 115.575  | 57.6     | 57.975  | 2.006510417 | 0.2012  | -1.687 |
| 99410_at   | 58.2   | 89.9   | 95.6   | 97.4   | 119.1  | 139.3  | 66.8   | 91.1   | 0.353970872 | 85.275   | 104.075  | 18.8    | 0.819361038 | 0.4027  | 1.199  |
| 99411_at   | 137.4  | 98.3   | 90.3   | 74     | 96.3   | 165.9  | 117.8  | 145.3  | 0.175533268 | 100      | 131.325  | 31.325  | 0.761469636 | 0.1658  | 1.319  |
| 99412_at   | 23.9   | 15.8   | 28.5   | 17.8   | 11.2   | 45.5   | 24.2   | 37.1   | 0.378266695 | 21.5     | 29.5     | 8       | 0.728813559 | 0.5432  | 1.243  |
| 99413_at   | 71.5   | 92.4   | 74     | 68     | 78     | 125.8  | 69.5   | 87.3   | 0.369105313 | 76.475   | 90.15    | 13.675  | 0.848308375 | 0.3538  | 1.157  |
| 99414_at   | 14.4   | 37.6   | 71.5   | 72.1   | 109.9  | 77.6   | 12.2   | 101.5  | 0.35918462  | 48.9     | 75.3     | 26.4    | 0.64940239  | 0.6242  | 1.393  |
| 99415_at   | 227.8  | 181.8  | 175.8  | 250.6  | 187.4  | 241.4  | 223.3  | 212    | 0.755134314 | 209      | 216.025  | 7.025   | 0.967480616 | 0.706   | 1.041  |
| 99416_at   | 9.1    | 10.7   | 23.7   | 67.3   | 100.4  | 45.8   | 87.2   | 136.4  | 0.034373117 | 27.7     | 92.45    | 64.75   | 0.299621417 | 0.02868 | 4.336  |
| 99417_at   | 31.4   | 28.7   | 24.9   | 24.1   | 33.9   | 132.3  | 23     | 29.1   | 0.371196995 | 27.275   | 54.575   | 27.3    | 0.499770957 | 0.3243  | 1.534  |
| 99418_at   | 137.8  | 144.8  | 118    | 184.9  | 112.8  | 189.8  | 149.3  | 155.6  | 0.803332912 | 146.375  | 151.875  | 5.5     | 0.963786008 | 0.8213  | 1.034  |
| 99419_g_at | 10     | 8      | 26.7   | 31.7   | 15.8   | 18.1   | 21     | 41.7   | 0.569729001 | 19.1     | 24.15    | 5.05    | 0.790890269 | 0.4542  | 1.386  |
| 99420_at   | 30.7   | 22.7   | 17.3   | 18     | 18.7   | 29.6   | 21     | 20     | 0.971008005 | 22.175   | 22.325   | 0.15    | 0.993281075 | 0.9258  | 1.016  |
| 99421_at   | 494    | 355.2  | 399.2  | 477.5  | 372.3  | 534.5  | 487.5  | 408.9  | 0.708749677 | 431.475  | 450.8    | 19.325  | 0.957131766 | 0.719   | 1.044  |
| 99422_at   | 104.9  | 39.3   | 18.2   | 66.6   | 52.1   | 39.8   | 46.4   | 85.9   | 0.957506077 | 57.25    | 56.05    | 1.2     | 1.021409456 | 0.7706  | 1.133  |
| 99423_at   | 18.9   | 14.1   | 11.8   | 12.5   | 5.1    | 13.7   | 14.9   | 13.5   | 0.399878903 | 14.325   | 11.8     | 2.525   | 1.213983051 | 0.3873  | -1.295 |
| 99424_at   | 11.2   | 8.6    | 18.5   | 10.9   | 9.4    | 14.7   | 9      | 11.3   | 0.652987558 | 12.3     | 11.1     | 1.2     | 1.108108108 | 0.6852  | -1.087 |
| 99425_at   | 36.3   | 36.5   | 71.4   | 68.1   | 1.3    | 34.1   | 120.6  | 63.3   | 0.951714809 | 53.075   | 54.825   | 1.75    | 0.968080255 | 0.5008  | -2.071 |
| 99426_at   | 580.8  | 613.8  | 679.7  | 496.8  | 284.8  | 528    | 517.3  | 445.1  | 0.076466359 | 592.775  | 443.8    | 148.975 | 1.335680487 | 0.09569 | -1.366 |
| 99427_at   | 6.6    | 3.7    | 3.7    | 2.5    | 3      | 10.7   | 2.4    | 2.6    | 0.81407743  | 4.125    | 4.675    | 0.55    | 0.882352941 | 0.958   | 1.022  |
| 99428_at   | 110    | 95.5   | 120.5  | 139.1  | 128.8  | 151.4  | 110.3  | 110.1  | 0.53288222  | 116.275  | 125.15   | 8.875   | 0.929085098 | 0.5239  | 1.077  |
| 99429_at   | 97.7   | 65.3   | 44.5   | 62.3   | 73.5   | 39.1   | 77.4   | 27.7   | 0.463313031 | 67.45    | 54.425   | 13.025  | 1.239320165 | 0.4092  | -1.302 |
| 99430_at   | 41.6   | 45     | 41.8   | 43     | 102.8  | 56.1   | 45.3   | 89     | 0.109667353 | 42.85    | 73.3     | 30.45   | 0.584583902 | 0.04626 | 1.621  |
| 99431_at   | 176.6  | 85.4   | 111.2  | 106.5  | 73.8   | 202.8  | 99.5   | 102.6  | 0.994498624 | 119.925  | 119.675  | 0.25    | 1.002088991 | 0.8861  | -1.04  |
| 99432_at   | 55.4   | 58.5   | 60.5   | 58.5   | 16.1   | 27.9   | 34.2   | 57.2   | 0.065587158 | 58.225   | 33.85    | 24.375  | 1.720088626 | 0.05015 | -1.898 |
| 99433_at   | 5.7    | 6.4    | 1.5    | 3.7    | 2.8    | 3      | 3.5    | 12.3   | 0.694060427 | 4.325    | 5.4      | 1.075   | 0.800925926 | 0.7589  | 1.166  |
| 99434_at   | 44     | 52     | 20     | 49.4   | 12.5   | 75.9   | 49.6   | 66.1   | 0.568315082 | 41.35    | 51.025   | 9.675   | 0.810387065 | 0.8719  | 1.082  |
| 99435_at   | 70     | 50.5   | 54     | 49.4   | 61.5   | 72.1   | 104.3  | 105.5  | 0.069497195 | 55.975   | 85.85    | 29.875  | 0.652009319 | 0.03961 | 1.509  |
| 99436_at   | 14     | 56.3   | 20     | 14.6   | 15.9   | 35.9   | 77.8   | 24     | 0.504969588 | 26.225   | 38.4     | 12.175  | 0.682942708 | 0.4437  | 1.469  |
| 99437_at   | 7.7    | 20.7   | 12     | 39.8   | 37.1   | 8.1    | 19.2   | 21.6   | 0.88125839  | 20.05    | 21.5     | 1.45    | 0.93255814  | 0.8029  | 1.132  |
| 99438_at   | 66.6   | 34.1   | 53.7   | 100.9  | 59.3   | 70.8   | 65.3   | 90.4   | 0.648443884 | 63.825   | 71.45    | 7.625   | 0.893282015 | 0.4979  | 1.191  |
| 99439_at   | 271.2  | 184    | 199    | 212.7  | 196.4  | 314.1  | 184.7  | 200.1  | 0.850441197 | 216.725  | 223.825  | 7.1     | 0.968278789 | 0.9021  | 1.019  |
| 99440_at   | 1027.3 | 1177.3 | 1315.8 | 1232.3 | 1156   | 1065.5 | 1471.4 | 1343.2 | 0.545820686 | 1188.175 | 1259.025 | 70.85   | 0.943726296 | 0.5684  | 1.056  |
| 99441_at   | 186.7  | 266.6  | 325.1  | 248.4  | 242.6  | 200.2  | 268.9  | 226.6  | 0.522908497 | 256.7    | 234.575  | 22.125  | 1.094319514 | 0.5795  | -1.079 |
| 99442_at   | 50.5   | 55.6   | 44.8   | 40.8   | 40.6   | 58.4   | 48.8   | 41.2   | 0.902559726 | 47.925   | 47.25    | 0.675   | 1.014285714 | 0.8683  | -1.019 |
| 99444_at   | 1112.5 | 1194.5 | 1322.1 | 937.3  | 1188.1 | 1089.7 | 1147.1 | 1203.7 | 0.863951036 | 1141.6   | 1157.15  | 15.55   | 0.986561811 | 0.7954  | 1.021  |
| 99445_at   | 695    | 642.1  | 830.9  | 984.9  | 965.1  | 870.1  | 1012.7 | 965    | 0.117421115 | 788.225  | 953.225  | 165     | 0.826903407 | 0.09141 | 1.224  |
| 99446_at   | 85     | 15.8   | 10.1   | 45.3   | 32.1   | 53.9   | 36.5   | 19.7   | 0.85955747  | 39.05    | 35.55    | 3.5     | 1.098452883 | 0.75    | 1.193  |
| 99447_at   | 297.3  | 343.7  | 348.5  | 365.5  | 292.6  | 291.3  | 358    | 236.9  | 0.187706971 | 338.75   | 294.7    | 44.05   | 1.149474041 | 0.174   | -1.158 |
| 99448_at   | 803.3  | 654.1  | 874.6  | 908.4  | 622.5  | 875    | 903    | 1069.1 | 0.618832935 | 810.1    | 867.4    | 57.3    | 0.933940512 | 0.6841  | 1.059  |
| 99449_at   | 145.6  | 21.7   | 71.5   | 129.8  | 87.8   | 93.8   | 91.2   | 71.5   | 0.845803246 | 92.15    | 86.075   | 6.075   | 1.070577984 | 0.7425  | 1.164  |
| 99450_at   | 53     | 26.9   | 23.4   | 34.6   | 45.5   | 65.8   | 45.4   | 60.5   | 0.058923012 | 34.475   | 54.3     | 19.825  | 0.634898711 | 0.05228 | 1.635  |
| 99451_at   | 539.6  | 470.9  | 512.4  | 487    | 475.3  | 499.6  | 544.3  | 494.5  | 0.965312405 | 502.475  | 503.425  | 0.95    | 0.998112926 | 0.9635  | 1.002  |



|            |        |        |        |        |        |        |        |        |             |          |          |         |             |          |        |
|------------|--------|--------|--------|--------|--------|--------|--------|--------|-------------|----------|----------|---------|-------------|----------|--------|
| 99452_at   | 1656.6 | 1530.1 | 1507   | 1684.3 | 1314.1 | 1063.2 | 1231.4 | 1189.7 | 0.00131266  | 1594.5   | 1199.6   | 394.9   | 1.329193064 | 0.001564 | -1.332 |
| 99453_at   | 22     | 7.8    | 14.9   | 29     | 6.4    | 20.2   | 24.7   | 31.4   | 0.758450359 | 18.425   | 20.675   | 2.25    | 0.891172914 | 0.8732   | 1.078  |
| 99455_s_at | 23     | 26.7   | 31.8   | 28.3   | 35.3   | 82.1   | 55.5   | 41.7   | 0.083837418 | 27.45    | 53.65    | 26.2    | 0.511649581 | 0.0194   | 1.866  |
| 99456_at   | 14.3   | 9.8    | 6.8    | 8.5    | 9.3    | 12.5   | 12.7   | 13.1   | 0.31692812  | 9.85     | 11.9     | 2.05    | 0.827731092 | 0.2626   | 1.24   |
| 99457_at   | 1258.7 | 1467.9 | 1517.4 | 1944.9 | 1696.6 | 1297   | 1946.9 | 2174.3 | 0.36825482  | 1547.225 | 1778.7   | 231.475 | 0.869862821 | 0.3866   | 1.143  |
| 99458_i_at | 1425.6 | 1894.2 | 2025.1 | 2408.9 | 1886.7 | 1279.2 | 1433.5 | 1739   | 0.206283511 | 1938.45  | 1584.6   | 353.85  | 1.223305566 | 0.213    | -1.216 |
| 99459_f_at | 123.3  | 124.1  | 202.7  | 177.9  | 105.8  | 80.4   | 90     | 126.6  | 0.058819303 | 157      | 100.7    | 56.3    | 1.559086395 | 0.03517  | -1.545 |
| 99460_at   | 17.9   | 20.5   | 29     | 42.9   | 16.1   | 50.7   | 16.4   | 20.4   | 0.873844526 | 27.575   | 25.9     | 1.675   | 1.064671815 | 0.7167   | -1.136 |
| 99461_at   | 55.1   | 48     | 60.7   | 47.1   | 39.9   | 78.8   | 56.5   | 44.2   | 0.83092827  | 52.725   | 54.85    | 2.125   | 0.961257976 | 0.9567   | 1.009  |
| 99462_at   | 327.4  | 403.8  | 391.6  | 495.4  | 492.3  | 358.6  | 536.9  | 517.3  | 0.226546427 | 404.55   | 476.275  | 71.725  | 0.849404231 | 0.2439   | 1.176  |
| 99463_at   | 69.1   | 30.5   | 45.1   | 50.6   | 55.6   | 85.6   | 58.1   | 49.9   | 0.276787261 | 48.825   | 62.3     | 13.475  | 0.783707865 | 0.2482   | 1.301  |
| 99464_at   | 385.4  | 586.4  | 662.2  | 672.4  | 820.5  | 715.7  | 671.2  | 610.4  | 0.168211536 | 576.6    | 704.45   | 127.85  | 0.818510895 | 0.1814   | 1.243  |
| 99465_at   | 273.6  | 262.8  | 242.4  | 271.6  | 256.4  | 322.8  | 304.5  | 298.6  | 0.0972684   | 262.6    | 295.575  | 32.975  | 0.888437791 | 0.08561  | 1.123  |
| 99466_at   | 302.3  | 254.1  | 239.9  | 210.9  | 161.9  | 259.7  | 220.7  | 168.5  | 0.154217309 | 251.8    | 202.7    | 49.1    | 1.242229896 | 0.1428   | -1.256 |
| 99467_at   | 453.2  | 498    | 769.3  | 979.8  | 646.9  | 542.5  | 810.1  | 897.8  | 0.750617525 | 675.075  | 724.325  | 49.25   | 0.93200566  | 0.6528   | 1.107  |
| 99469_at   | 363.9  | 385.8  | 329    | 324.8  | 293    | 367.1  | 279.4  | 298.1  | 0.144900845 | 350.875  | 309.4    | 41.475  | 1.134049774 | 0.1286   | -1.138 |
| 99471_at   | 840.5  | 556    | 646.5  | 665.7  | 592.3  | 676.4  | 659    | 790    | 0.976295313 | 677.175  | 679.425  | 2.25    | 0.996688376 | 0.933    | 1.009  |
| 99472_at   | 61.9   | 43.9   | 41.8   | 57.7   | 30     | 58.3   | 39.5   | 36.7   | 0.243148194 | 51.325   | 41.125   | 10.2    | 1.248024316 | 0.2134   | -1.267 |
| 99473_at   | 5.4    | 4.5    | 3.7    | 3.5    | 5.1    | 9.4    | 6      | 4.3    | 0.18692615  | 4.275    | 6.2      | 1.925   | 0.689516129 | 0.1296   | 1.406  |
| 99474_at   | 30.4   | 36.6   | 25.8   | 45.1   | 40.1   | 56.9   | 28.1   | 49.5   | 0.272788641 | 34.475   | 43.65    | 9.175   | 0.789805269 | 0.2936   | 1.252  |
| 99475_at   | 6872.6 | 6804   | 6140.7 | 4475.7 | 5198.9 | 7172.6 | 4027.6 | 4406.3 | 0.369700799 | 6073.25  | 5201.35  | 871.9   | 1.167629558 | 0.3447   | -1.181 |
| 99476_at   | 237    | 343.5  | 313.5  | 413.7  | 297.6  | 337.1  | 556.7  | 503.4  | 0.242870585 | 326.925  | 423.7    | 96.775  | 0.771595468 | 0.2476   | 1.277  |
| 99477_at   | 150    | 120.3  | 190.8  | 189    | 44.4   | 122.7  | 237.3  | 151.4  | 0.614512299 | 162.525  | 138.95   | 23.575  | 1.169665347 | 0.449    | -1.351 |
| 99478_at   | 248    | 264.6  | 195.5  | 198.6  | 224.4  | 265.2  | 174.5  | 266    | 0.840600731 | 226.675  | 232.525  | 5.85    | 0.974841415 | 0.8775   | 1.02   |
| 99479_at   | 53.9   | 98.1   | 46.4   | 63.4   | 61.2   | 73.3   | 33.5   | 64.9   | 0.633027163 | 65.45    | 58.225   | 7.225   | 1.124087591 | 0.6411   | -1.124 |
| 99481_at   | 225.3  | 262.2  | 242.6  | 143.7  | 361    | 221.5  | 309.3  | 246.1  | 0.159070585 | 218.45   | 284.475  | 66.025  | 0.767905791 | 0.171    | 1.311  |
| 99485_at   | 186.9  | 163.8  | 190.2  | 187.7  | 139.7  | 206.1  | 241.2  | 174.9  | 0.733139775 | 182.15   | 190.475  | 8.325   | 0.956293477 | 0.8362   | 1.027  |
| 99486_at   | 414.8  | 439.4  | 468.7  | 387.5  | 363.9  | 436.1  | 407.9  | 302.7  | 0.201159266 | 427.6    | 377.65   | 49.95   | 1.132265325 | 0.1941   | -1.14  |
| 99488_at   | 5      | 3.4    | 2.3    | 7      | 2.5    | 3.9    | 1.8    | 2      | 0.167321004 | 4.425    | 2.55     | 1.875   | 1.735294118 | 0.1421   | -1.653 |
| 99489_at   | 193.3  | 220    | 164.6  | 228.7  | 211.2  | 156    | 238.5  | 204    | 0.973610381 | 201.65   | 202.425  | 0.775   | 0.996171422 | 0.997    | -1     |
| 99490_at   | 468.3  | 468.9  | 690.1  | 534.8  | 529.4  | 529    | 470.7  | 462    | 0.485901291 | 540.525  | 497.775  | 42.75   | 1.085882176 | 0.4953   | -1.074 |
| 99491_at   | 992.8  | 998.2  | 1026.8 | 1080.7 | 1147.6 | 894.1  | 961.4  | 913.1  | 0.501709023 | 1024.625 | 979.05   | 45.575  | 1.046550227 | 0.4368   | -1.051 |
| 99492_at   | 404.6  | 284.7  | 313.8  | 368.4  | 276.4  | 442.2  | 305.9  | 301.4  | 0.813887365 | 342.875  | 331.475  | 11.4    | 1.034391734 | 0.7601   | -1.043 |
| 99493_at   | 710.1  | 599.3  | 707.9  | 619.6  | 685.2  | 702.8  | 773.7  | 696.7  | 0.173713577 | 659.225  | 714.6    | 55.375  | 0.922509096 | 0.1644   | 1.086  |
| 99494_at   | 273.9  | 332.3  | 318    | 295.7  | 417.2  | 420.9  | 327.1  | 353.1  | 0.041422587 | 304.975  | 379.575  | 74.6    | 0.803464401 | 0.02892  | 1.241  |
| 99497_at   | 549.5  | 415.9  | 421.8  | 423.1  | 414.4  | 569.2  | 485.8  | 587.8  | 0.277347682 | 452.575  | 514.3    | 61.725  | 0.8799825   | 0.2764   | 1.134  |
| 99498_at   | 70.9   | 72.3   | 45.6   | 62.6   | 79.2   | 82.6   | 66.3   | 86.2   | 0.086409881 | 62.85    | 78.575   | 15.725  | 0.799872733 | 0.1007   | 1.265  |
| 99499_at   | 331.2  | 248.7  | 209.4  | 273.2  | 276.6  | 299.5  | 273.2  | 325.6  | 0.372454939 | 265.625  | 293.725  | 28.1    | 0.904332284 | 0.3234   | 1.118  |
| 99500_at   | 681.7  | 748.4  | 1076.7 | 1270.4 | 931.1  | 877.6  | 1126.9 | 1255.4 | 0.555799444 | 944.3    | 1047.75  | 103.45  | 0.901264615 | 0.4845   | 1.134  |
| 99501_at   | 276.7  | 309.5  | 472.2  | 330.5  | 206    | 298.5  | 473    | 263.4  | 0.62648703  | 347.225  | 310.225  | 37      | 1.119268273 | 0.5307   | -1.149 |
| 99502_at   | 481.7  | 549.1  | 658.7  | 654.7  | 714.2  | 370.8  | 641.1  | 644.5  | 0.942758126 | 586.05   | 592.65   | 6.6     | 0.988863579 | 0.9522   | 1.01   |
| 99503_at   | 683.2  | 734    | 752.2  | 658.2  | 727.5  | 667.2  | 592.8  | 660.4  | 0.250803427 | 706.9    | 661.975  | 44.925  | 1.067865101 | 0.2473   | -1.069 |
| 99504_at   | 67.4   | 61.1   | 60.3   | 67.1   | 88.7   | 71     | 68.5   | 57.2   | 0.346197282 | 63.975   | 71.35    | 7.375   | 0.8966363   | 0.3391   | 1.103  |
| 99505_at   | 1345.1 | 992    | 946.1  | 1221.6 | 895.7  | 1199.8 | 1128.4 | 1094.1 | 0.700167018 | 1126.2   | 1079.5   | 46.7    | 1.043260769 | 0.7323   | -1.038 |
| 99506_at   | 307.9  | 205.8  | 226.6  | 259    | 227.5  | 327.9  | 241    | 246    | 0.746500888 | 249.825  | 260.6    | 10.775  | 0.958653108 | 0.73     | 1.044  |
| 99507_at   | 11.7   | 11.3   | 22.6   | 39.1   | 44.1   | 16.7   | 7      | 10.7   | 0.889179698 | 21.175   | 19.625   | 1.55    | 1.078980892 | 0.7178   | -1.205 |
| 99508_at   | 44.3   | 133.1  | 78.9   | 43.4   | 95.6   | 70.6   | 50.7   | 63.8   | 0.846709893 | 74.925   | 70.175   | 4.75    | 1.067687923 | 0.9485   | 1.02   |
| 99509_s_at | 251.7  | 233.3  | 226.6  | 213.2  | 201    | 372.2  | 210.7  | 227.3  | 0.631964087 | 231.2    | 252.8    | 21.6    | 0.914556962 | 0.7036   | 1.06   |
| 99510_at   | 297.4  | 201.5  | 225.9  | 427.5  | 247.8  | 266.9  | 272.1  | 296.9  | 0.76056503  | 288.075  | 270.925  | 17.15   | 1.063301652 | 0.9116   | 1.02   |
| 99511_at   | 41.1   | 36.1   | 51     | 61.9   | 35.8   | 61.7   | 35.3   | 50.4   | 0.846635649 | 47.525   | 45.8     | 1.725   | 1.037663755 | 0.8172   | -1.045 |
| 99512_at   | 2572   | 2517.5 | 2389.4 | 2452.4 | 3027.2 | 2742.4 | 2751.8 | 2677.7 | 0.018182014 | 2482.825 | 2799.775 | 316.95  | 0.886794475 | 0.00898  | 1.127  |
| 99513_at   | 679.1  | 781    | 757.6  | 820.1  | 741.2  | 820.5  | 919.6  | 763    | 0.342218465 | 759.45   | 811.075  | 51.625  | 0.936349906 | 0.3413   | 1.067  |
| 99514_at   | 1641.6 | 1611.3 | 2058.4 | 1900.5 | 1388.7 | 1323   | 1473.5 | 1638.3 | 0.040292519 | 1802.95  | 1455.875 | 347.075 | 1.238396154 | 0.02989  | -1.236 |
| 99515_at   | 162.8  | 171.4  | 351.4  | 172.7  | 119.8  | 240.5  | 210.4  | 140.7  | 0.525140992 | 214.575  | 177.85   | 36.725  | 1.206494237 | 0.5123   | -1.187 |
| 99516_at   | 24.5   | 58     | 12.4   | 17     | 16     | 23.3   | 30.5   | 39.7   | 0.960657202 | 27.975   | 27.375   | 0.6     | 1.021917808 | 0.7995   | 1.108  |
| 99517_at   | 115.1  | 110.8  | 82.8   | 112.8  | 103.9  | 127.7  | 137.3  | 91.9   | 0.478584635 | 105.375  | 115.2    | 9.825   | 0.914713542 | 0.508    | 1.089  |



|            |        |         |        |        |        |        |        |        |             |          |          |         |             |         |        |
|------------|--------|---------|--------|--------|--------|--------|--------|--------|-------------|----------|----------|---------|-------------|---------|--------|
| 99518_at   | 227.8  | 253.3   | 222.7  | 293.5  | 301.3  | 211.6  | 347.5  | 226.8  | 0.561092154 | 249.325  | 271.8    | 22.475  | 0.917310522 | 0.6096  | 1.074  |
| 99521_at   | 184    | 105.6   | 152.4  | 152.4  | 164.2  | 128.7  | 141.2  | 141.5  | 0.803813164 | 148.6    | 143.9    | 4.7     | 1.032661571 | 0.9008  | 1.017  |
| 99522_at   | 62.4   | 50.9    | 55.5   | 85.9   | 53.5   | 46     | 53.3   | 71.7   | 0.460827627 | 63.675   | 56.125   | 7.55    | 1.134521158 | 0.4496  | -1.127 |
| 99523_at   | 154.2  | 140.5   | 129.9  | 140.8  | 125.6  | 224.1  | 119.5  | 128.2  | 0.772647989 | 141.35   | 149.35   | 8       | 0.94643455  | 0.8938  | 1.021  |
| 99524_at   | 506.7  | 827.3   | 838.8  | 984.5  | 765.4  | 635.3  | 933.5  | 1081.6 | 0.660949811 | 789.325  | 853.95   | 64.625  | 0.924322267 | 0.653   | 1.091  |
| 99525_at   | 16.3   | 61.2    | 51.7   | 52.4   | 10.6   | 53.5   | 49.9   | 33.5   | 0.563366102 | 45.4     | 36.875   | 8.525   | 1.231186441 | 0.6072  | -1.299 |
| 99527_at   | 24.9   | 3.3     | 15.2   | 3.1    | 12     | 8      | 18.5   | 19.8   | 0.642526136 | 11.625   | 14.575   | 2.95    | 0.797598628 | 0.3682  | 1.747  |
| 99528_at   | 456.8  | 485.5   | 662.1  | 575.9  | 318.9  | 326.8  | 561.4  | 498.5  | 0.176993275 | 545.075  | 426.4    | 118.675 | 1.27831848  | 0.163   | -1.305 |
| 99529_f_at | 170.2  | 183.7   | 369.4  | 358    | 289.2  | 225    | 260.2  | 353.8  | 0.854951722 | 270.325  | 282.05   | 11.725  | 0.958429356 | 0.7004  | 1.097  |
| 99530_at   | 38.4   | 40      | 19.8   | 11.6   | 14.6   | 29.2   | 9.2    | 31.6   | 0.506267275 | 27.45    | 21.15    | 6.3     | 1.29787234  | 0.5514  | -1.3   |
| 99531_at   | 47.8   | 47.9    | 36.5   | 39.3   | 38.3   | 53.7   | 36.8   | 40.3   | 0.906018543 | 42.875   | 42.275   | 0.6     | 1.014192785 | 0.8743  | 1.018  |
| 99532_at   | 825.9  | 842.1   | 1204.5 | 1258.9 | 969.6  | 777.3  | 1062.9 | 1166   | 0.79411052  | 1032.85  | 993.95   | 38.9    | 1.039136778 | 0.8383  | 1.031  |
| 99534_at   | 12.6   | 10      | 7.5    | 8      | 8      | 12.2   | 8.6    | 9.7    | 0.948573411 | 9.525    | 9.625    | 0.1     | 0.98961039  | 0.9155  | 1.017  |
| 99535_at   | 348.8  | 293.9   | 453.4  | 502    | 325    | 302.2  | 332.1  | 397.5  | 0.30753146  | 399.525  | 339.2    | 60.325  | 1.177844929 | 0.3194  | -1.158 |
| 99536_at   | 190.2  | 180.5   | 215.7  | 233.4  | 288.6  | 153.5  | 214.7  | 225    | 0.63385785  | 204.95   | 220.45   | 15.5    | 0.929689272 | 0.7202  | 1.055  |
| 99537_at   | 1520.7 | 1379.9  | 1198.7 | 977.9  | 1337.6 | 1470.6 | 1189.2 | 1240.1 | 0.775990383 | 1269.3   | 1309.375 | 40.075  | 0.969393795 | 0.712   | 1.042  |
| 99541_at   | 649.4  | 624.7   | 680.5  | 642    | 624.9  | 585.9  | 633.8  | 559.1  | 0.067098171 | 649.15   | 600.925  | 48.225  | 1.080251279 | 0.06264 | -1.081 |
| 99542_at   | 66     | 71.1    | 33.4   | 55.2   | 56     | 65     | 35     | 51     | 0.671818322 | 56.425   | 51.75    | 4.675   | 1.090338164 | 0.7485  | -1.075 |
| 99543_s_at | 1564.6 | 1304.1  | 1408.7 | 1206.5 | 1314.9 | 1446.4 | 1320.1 | 1417.9 | 0.965445184 | 1370.975 | 1374.825 | 3.85    | 0.997199644 | 0.9175  | 1.007  |
| 99544_at   | 1019.4 | 913     | 716.2  | 675.3  | 813.8  | 786.6  | 777.8  | 730.9  | 0.56143534  | 830.975  | 777.275  | 53.7    | 1.069087517 | 0.6149  | -1.055 |
| 99545_at   | 22.5   | 43.3    | 22     | 30.1   | 73.3   | 42.1   | 21.4   | 67.5   | 0.171350246 | 29.475   | 51.075   | 21.6    | 0.577092511 | 0.1856  | 1.623  |
| 99546_at   | 1942.9 | 1709.6  | 1765.8 | 1710.9 | 1765.4 | 2001.7 | 1995.7 | 1492.9 | 0.822324767 | 1782.3   | 1813.925 | 31.625  | 0.982565431 | 0.879   | 1.012  |
| 99548_at   | 89.5   | 89.9    | 118.3  | 98.8   | 89.7   | 181.9  | 115    | 126.1  | 0.236471798 | 99.125   | 128.175  | 29.05   | 0.773356739 | 0.2002  | 1.26   |
| 99549_at   | 1985.7 | 2178.9  | 2048.8 | 2475.7 | 1963.9 | 1987.4 | 3461.6 | 2746.5 | 0.38689472  | 2172.275 | 2539.85  | 367.575 | 0.855276886 | 0.4011  | 1.14   |
| 99551_f_at | 28     | 20.8    | 24.9   | 40.4   | 26.4   | 42.4   | 40.3   | 29.5   | 0.330129358 | 28.525   | 34.65    | 6.125   | 0.823232323 | 0.3023  | 1.228  |
| 99552_at   | 1686.1 | 1631.5  | 1917.7 | 1736   | 1716.8 | 1486.7 | 1897.8 | 2126   | 0.688945407 | 1742.825 | 1806.825 | 64      | 0.96457875  | 0.7376  | 1.03   |
| 99553_f_at | 122.8  | 144.5   | 84.5   | 93.9   | 78.7   | 116.2  | 71.6   | 86     | 0.221039261 | 111.425  | 88.125   | 23.3    | 1.264397163 | 0.2051  | -1.258 |
| 99555_at   | 13.4   | 5.9     | 20.8   | 14     | 12.7   | 19.6   | 17.9   | 10.8   | 0.658881719 | 13.525   | 15.25    | 1.725   | 0.886885246 | 0.5642  | 1.2    |
| 99556_s_at | 54.2   | 43.6    | 10.1   | 52.1   | 51.4   | 58.6   | 37.3   | 32.7   | 0.691623882 | 40       | 45       | 5       | 0.888888889 | 0.5459  | 1.312  |
| 99557_at   | 28     | 27.8    | 35.4   | 53     | 11.7   | 29.4   | 26     | 31.8   | 0.182132384 | 36.05    | 24.725   | 11.325  | 1.458038423 | 0.1884  | -1.506 |
| 99558_at   | 388.9  | 242     | 316.9  | 227    | 269.1  | 390.9  | 293.3  | 277.2  | 0.776767806 | 293.7    | 307.625  | 13.925  | 0.954733848 | 0.7123  | 1.06   |
| 99559_at   | 917.5  | 717     | 683.5  | 791.7  | 558.8  | 584    | 680.5  | 691.9  | 0.059916866 | 777.425  | 628.8    | 148.625 | 1.236362913 | 0.04717 | -1.234 |
| 99561_f_at | 9.4    | 22.9    | 29.3   | 37.8   | 25.8   | 10.6   | 5.4    | 34     | 0.533543876 | 24.85    | 18.95    | 5.9     | 1.311345646 | 0.4801  | -1.477 |
| 99562_at   | 536.8  | 610.7   | 683    | 660.5  | 608.8  | 541.6  | 731.3  | 780.7  | 0.532032385 | 622.75   | 665.6    | 42.85   | 0.935621995 | 0.5663  | 1.062  |
| 99563_at   | 2792   | 2766.8  | 3119.3 | 3185.5 | 2664.5 | 2108   | 2697.6 | 2782.9 | 0.081429193 | 2965.9   | 2563.25  | 402.65  | 1.157085731 | 0.08825 | -1.162 |
| 99564_at   | 892    | 937.9   | 1108.8 | 1072.4 | 813    | 704.1  | 924.4  | 919    | 0.069357271 | 1002.775 | 840.125  | 162.65  | 1.193602143 | 0.07374 | -1.196 |
| 99566_at   | 4529.7 | 4955.2  | 3846.5 | 3364.5 | 4483.6 | 5534.2 | 4277.4 | 3919   | 0.472607803 | 4173.975 | 4553.55  | 379.575 | 0.916641961 | 0.4573  | 1.094  |
| 99567_at   | 2.3    | 2.3     | 1.2    | 2.6    | 1.4    | 3.1    | 2.5    | 2.5    | 0.579965959 | 2.1      | 2.375    | 0.275   | 0.884210526 | 0.683   | 1.113  |
| 99569_at   | 90.1   | 114.8   | 94.5   | 87.8   | 94.6   | 131.7  | 93.9   | 118.5  | 0.298800347 | 96.8     | 109.675  | 12.875  | 0.882607705 | 0.2925  | 1.127  |
| 99570_s_at | 153.1  | 155.4   | 275.4  | 302    | 247.1  | 206    | 267.4  | 313.1  | 0.451768357 | 221.475  | 258.4    | 36.925  | 0.857101393 | 0.3779  | 1.211  |
| 99571_at   | 422.7  | 333.2   | 372.6  | 453    | 355.7  | 489.5  | 475.3  | 374.9  | 0.53618044  | 395.375  | 423.85   | 28.475  | 0.932818214 | 0.5537  | 1.069  |
| 99574_at   | 806.1  | 773.3   | 907.5  | 1117.4 | 733.3  | 684    | 775.6  | 859.1  | 0.178513109 | 901.075  | 763      | 138.075 | 1.180963303 | 0.1466  | -1.173 |
| 99575_at   | 733    | 632.2   | 1253.3 | 1186.4 | 707.3  | 829.7  | 1046.2 | 1173.5 | 0.951495191 | 951.225  | 939.175  | 12.05   | 1.01283041  | 0.9586  | 1.011  |
| 99576_at   | 6      | 13.8    | 1.9    | 7.6    | 5.8    | 10.6   | 3.4    | 10.1   | 0.962145576 | 7.325    | 7.475    | 0.15    | 0.97993311  | 0.7861  | 1.151  |
| 99577_at   | 1430.4 | 1614.8  | 2065.1 | 1698.2 | 1094.2 | 810.6  | 1253.7 | 1080.2 | 0.009388029 | 1702.125 | 1059.675 | 642.45  | 1.606270791 | 0.00714 | -1.611 |
| 99578_at   | 1335.3 | 1228.3  | 1317.6 | 1233.2 | 1287.7 | 1176.7 | 1431.6 | 1165.9 | 0.85563332  | 1278.6   | 1265.475 | 13.125  | 1.0103716   | 0.8114  | -1.013 |
| 99579_at   | 5444   | 4082.1  | 4596.3 | 4409.3 | 3995.8 | 4455.2 | 4852.3 | 4282.1 | 0.519072595 | 4632.925 | 4396.35  | 236.575 | 1.053811685 | 0.5258  | -1.05  |
| 99580_s_at | 1081.7 | 1192.6  | 1251.7 | 944.7  | 1370.7 | 1563.7 | 1414.1 | 1042.6 | 0.134527392 | 1117.675 | 1347.775 | 230.1   | 0.829274174 | 0.1385  | 1.2    |
| 99581_at   | 9585   | 11910.3 | 8031.5 | 7509.8 | 9559.4 | 9324.8 | 7488.1 | 8723   | 0.678056304 | 9259.15  | 8773.825 | 485.325 | 1.055315099 | 0.7318  | -1.043 |
| 99582_at   | 34.3   | 22.6    | 32.9   | 37.3   | 44.9   | 47.1   | 35.3   | 40.9   | 0.048262628 | 31.775   | 42.05    | 10.275  | 0.755648038 | 0.06366 | 1.338  |
| 99583_at   | 4410.8 | 3990.7  | 3307.5 | 3606.8 | 3408.3 | 3723.9 | 3604.3 | 3873.9 | 0.532725214 | 3828.95  | 3652.6   | 176.35  | 1.048280677 | 0.5552  | -1.043 |
| 99584_at   | 880.7  | 628.9   | 829    | 660.5  | 487.9  | 964.3  | 698.3  | 837.8  | 0.982837509 | 749.775  | 747.075  | 2.7     | 1.003614095 | 0.8907  | -1.025 |
| 99585_at   | 225.5  | 238.9   | 175.9  | 232.4  | 237    | 321.8  | 244.9  | 256.7  | 0.103212249 | 218.175  | 265.1    | 46.925  | 0.822991324 | 0.09595 | 1.215  |
| 99586_at   | 8464.5 | 11544.4 | 6769.9 | 7175.3 | 9366.5 | 8180.1 | 8183   | 6728.2 | 0.770932664 | 8488.525 | 8114.45  | 374.075 | 1.046099859 | 0.8374  | -1.03  |
| 99587_at   | 823.7  | 679.7   | 1000.3 | 717.6  | 943.6  | 659.5  | 873.5  | 958.2  | 0.611037951 | 805.325  | 858.7    | 53.375  | 0.937842087 | 0.6152  | 1.067  |
| 99589_f_at | 3.7    | 9.7     | 1.6    | 7.7    | 6.2    | 16.2   | 6.3    | 9.4    | 0.246947832 | 5.675    | 9.525    | 3.85    | 0.595800525 | 0.2116  | 1.923  |



|            |         |        |         |         |         |         |         |         |             |          |          |          |             |         |        |
|------------|---------|--------|---------|---------|---------|---------|---------|---------|-------------|----------|----------|----------|-------------|---------|--------|
| 99590_at   | 11413.1 | 13800  | 10709.6 | 11674.5 | 13740.5 | 13571.2 | 12375.8 | 13340.5 | 0.133730251 | 11899.3  | 13257    | 1357.7   | 0.897586181 | 0.1067  | 1.118  |
| 99591_i_at | 434.9   | 344.2  | 311.5   | 386.2   | 376.9   | 312     | 468.3   | 435.5   | 0.531938788 | 369.2    | 398.175  | 28.975   | 0.927230489 | 0.5563  | 1.074  |
| 99592_f_at | 1402.6  | 1478.8 | 1467.6  | 1432.3  | 1736.6  | 1236.3  | 1653.1  | 1610.8  | 0.381371183 | 1445.325 | 1559.2   | 113.875  | 0.926965752 | 0.4135  | 1.07   |
| 99593_at   | 3544.8  | 3855.3 | 2904    | 2653.2  | 3998.8  | 2852.8  | 3062.6  | 2871.2  | 0.915600726 | 3239.325 | 3196.35  | 42.975   | 1.013445023 | 0.9211  | -1.012 |
| 99594_at   | 2445.3  | 2494   | 1868.2  | 1650.7  | 2049    | 2346.8  | 1736.4  | 1849.4  | 0.652123181 | 2114.55  | 1995.4   | 119.15   | 1.059712338 | 0.698   | -1.051 |
| 99595_at   | 70.1    | 61.6   | 44      | 42      | 48.1    | 72.7    | 54.2    | 20.5    | 0.682112426 | 54.425   | 48.875   | 5.55     | 1.113554987 | 0.5698  | -1.197 |
| 99596_f_at | 5409.9  | 6732.3 | 6973.8  | 6909.5  | 5750.2  | 5295.4  | 5987.2  | 6191.7  | 0.159539684 | 6506.375 | 5806.125 | 700.25   | 1.120605395 | 0.1611  | -1.117 |
| 99597_at   | 1015.3  | 871.1  | 842.7   | 806.9   | 767.4   | 829     | 596.6   | 650.4   | 0.049280881 | 884      | 710.85   | 173.15   | 1.243581628 | 0.04869 | -1.249 |
| 99598_g_at | 2108.2  | 2045.8 | 3352.1  | 2294.6  | 2292.8  | 2548.7  | 1860.5  | 1981.1  | 0.456052238 | 2450.175 | 2170.775 | 279.4    | 1.128709793 | 0.4523  | -1.114 |
| 99599_s_at | 6872.2  | 6847.1 | 6110.2  | 5648.5  | 5432.7  | 6043.5  | 4879.1  | 4948.4  | 0.041173863 | 6369.5   | 5325.925 | 1043.575 | 1.195942489 | 0.03991 | -1.196 |
| 99600_at   | 1041.9  | 1216.9 | 1150.6  | 994.5   | 1576    | 1235.8  | 850.6   | 899.3   | 0.834980069 | 1100.975 | 1140.425 | 39.45    | 0.965407633 | 0.9665  | 1.007  |
| 99602_at   | 819     | 1034.8 | 1218.9  | 886.9   | 827.4   | 1162.8  | 861.1   | 847.2   | 0.603911007 | 989.9    | 924.625  | 65.275   | 1.070596188 | 0.5957  | -1.069 |
| 99603_g_at | 587.8   | 639.8  | 907.5   | 662.6   | 628.3   | 876.2   | 706.2   | 675.5   | 0.813101962 | 699.425  | 721.55   | 22.125   | 0.969336844 | 0.7639  | 1.038  |
| 99604_at   | 1447.6  | 1658   | 2009.9  | 2156.9  | 2022.7  | 1657.7  | 1887.4  | 1963.3  | 0.736796217 | 1818.1   | 1882.775 | 64.675   | 0.965649108 | 0.6759  | 1.045  |
| 99605_at   | 16.8    | 14.1   | 4.5     | 1.2     | 2.8     | 20.2    | 5.5     | 5       | 0.891892238 | 9.15     | 8.375    | 0.775    | 1.092537313 | 0.9583  | 1.041  |
| 99606_at   | 312.9   | 272.9  | 252.4   | 281.7   | 212.3   | 315.3   | 246.8   | 248.4   | 0.376604976 | 279.975  | 255.7    | 24.275   | 1.094935471 | 0.3327  | -1.103 |
| 99607_at   | 2935    | 3907.8 | 3582.9  | 4174.6  | 4102.1  | 3397.4  | 4288.9  | 3976    | 0.414081953 | 3650.075 | 3941.1   | 291.025  | 0.926156403 | 0.409   | 1.085  |
| 99608_at   | 649.1   | 684    | 450.1   | 378     | 568.9   | 695.4   | 630.6   | 558.9   | 0.41763192  | 540.3    | 613.45   | 73.15    | 0.880756378 | 0.3524  | 1.166  |
| 99609_at   | 3.4     | 2.2    | 1.1     | 4.1     | 3.4     | 2.9     | 3.7     | 2.2     | 0.658305905 | 2.7      | 3.05     | 0.35     | 0.885245902 | 0.5216  | 1.234  |
| 99610_at   | 1325.1  | 1281.3 | 1399.9  | 1726.2  | 1393    | 1380.5  | 1887.1  | 1762.9  | 0.334203083 | 1433.125 | 1605.875 | 172.75   | 0.892426247 | 0.329   | 1.117  |
| 99613_at   | 443.2   | 565.5  | 465.5   | 389.8   | 832.1   | 636.1   | 599.9   | 610.1   | 0.025531279 | 466      | 669.55   | 203.55   | 0.695989844 | 0.01573 | 1.437  |
| 99615_at   | 96.1    | 58.8   | 53.7    | 63      | 61      | 103.5   | 102.3   | 87.8    | 0.182635675 | 67.9     | 88.65    | 20.75    | 0.765933446 | 0.1786  | 1.312  |
| 99616_s_at | 615.3   | 631.9  | 723.3   | 822.5   | 908.1   | 499.5   | 774.9   | 704.3   | 0.820445421 | 698.25   | 721.7    | 23.45    | 0.967507274 | 0.9095  | 1.017  |
| 99617_at   | 687.4   | 638.9  | 826.1   | 955.7   | 658     | 680.6   | 838.5   | 881.9   | 0.897208872 | 777.025  | 764.75   | 12.275   | 1.016050997 | 0.9248  | -1.012 |
| 99618_at   | 1934.7  | 2714.5 | 1803.7  | 1738.4  | 2592.9  | 1985.8  | 2049.5  | 2085.7  | 0.643652646 | 2047.825 | 2178.475 | 130.65   | 0.940026854 | 0.5634  | 1.075  |
| 99619_at   | 1395.1  | 1236.6 | 1286    | 1103.5  | 1267.5  | 1540.5  | 1159.3  | 1285.6  | 0.588226654 | 1255.3   | 1313.225 | 57.925   | 0.955891032 | 0.5951  | 1.044  |
| 99620_at   | 87.7    | 103.8  | 253.8   | 235.9   | 132.6   | 106.8   | 223     | 183.1   | 0.866767757 | 170.3    | 161.375  | 8.925    | 1.055305964 | 0.9646  | 1.015  |
| 99621_s_at | 620.3   | 564.9  | 1110.8  | 1144.1  | 378.8   | 567     | 1016.6  | 958.5   | 0.574018816 | 860.025  | 730.225  | 129.8    | 1.177753432 | 0.5514  | -1.208 |
| 99622_at   | 178.2   | 226.7  | 369.6   | 473.7   | 250.6   | 157.4   | 307.8   | 288.8   | 0.460273075 | 312.05   | 251.15   | 60.9     | 1.242484571 | 0.5395  | -1.192 |
| 99623_s_at | 64.9    | 59.8   | 79.1    | 105.8   | 80.9    | 64.2    | 91.4    | 64.9    | 0.873410291 | 77.4     | 75.35    | 2.05     | 1.02720637  | 0.9338  | 1.013  |
| 99624_at   | 1879.2  | 1972.4 | 2424.8  | 2420.4  | 1776.9  | 1704.3  | 1968.5  | 2008    | 0.121622619 | 2174.2   | 1864.425 | 309.775  | 1.166150422 | 0.1037  | -1.161 |
| 99626_i_at | 4.9     | 4      | 1.3     | 2.6     | 9.1     | 2.8     | 2       | 5.5     | 0.403788007 | 3.2      | 4.85     | 1.65     | 0.659793814 | 0.4439  | 1.444  |
| 99627_r_at | 62      | 49.8   | 43.3    | 56.3    | 28.7    | 70.2    | 38.6    | 58      | 0.716049129 | 52.85    | 48.875   | 3.975    | 1.081329923 | 0.5723  | -1.137 |
| 99628_at   | 2804.4  | 2864   | 2518    | 2947    | 2675.7  | 2720.1  | 3257.1  | 3371.7  | 0.326392265 | 2783.35  | 3006.15  | 222.8    | 0.925885269 | 0.3289  | 1.076  |
| 99629_at   | 1932.4  | 2109   | 2185.1  | 2243    | 2012.1  | 1885.7  | 2386.2  | 2545    | 0.622123938 | 2117.375 | 2207.25  | 89.875   | 0.959281912 | 0.6614  | 1.036  |
| 99630_at   | 353.9   | 384.5  | 245.6   | 279.8   | 352.2   | 304.8   | 232.1   | 261.6   | 0.521627996 | 315.95   | 287.675  | 28.275   | 1.098287999 | 0.5362  | -1.095 |
| 99631_f_at | 7376.8  | 8024.9 | 6368    | 6192.1  | 8090.7  | 6782.4  | 6847.6  | 7340.8  | 0.623023517 | 6990.45  | 7265.375 | 274.925  | 0.962159558 | 0.5915  | 1.043  |
| 99632_at   | 1672.7  | 1839.1 | 1925.1  | 1936.5  | 2005.9  | 1391.3  | 1926    | 1754.1  | 0.645546456 | 1843.35  | 1769.325 | 74.025   | 1.041837989 | 0.6004  | -1.05  |
| 99633_at   | 327.2   | 249.8  | 394.9   | 404.8   | 255.6   | 302.2   | 302.1   | 242.6   | 0.152863462 | 344.175  | 275.625  | 68.55    | 1.248707483 | 0.1459  | -1.233 |
| 99635_at   | 893.7   | 927    | 878.3   | 837.8   | 1161.8  | 1157.7  | 822     | 1043.1  | 0.132918291 | 884.2    | 1046.15  | 161.95   | 0.845194284 | 0.1059  | 1.173  |
| 99636_at   | 1088.7  | 979.6  | 1156.9  | 980.4   | 1047.4  | 1061.2  | 853.9   | 1139.8  | 0.742574498 | 1051.4   | 1025.575 | 25.825   | 1.025180996 | 0.72    | -1.028 |
| 99637_at   | 529.4   | 459.8  | 658.8   | 773.1   | 377.1   | 531.1   | 482.3   | 536.9   | 0.18309377  | 605.275  | 481.85   | 123.425  | 1.256148179 | 0.1743  | -1.243 |
| 99638_at   | 938.2   | 1007.8 | 1058.1  | 954.2   | 835.4   | 1043.3  | 991.1   | 898.4   | 0.419468616 | 989.575  | 942.05   | 47.525   | 1.05044849  | 0.3968  | -1.053 |
| 99639_at   | 629.7   | 489.3  | 671.5   | 721.8   | 577.8   | 618.3   | 632     | 722     | 0.877999521 | 628.075  | 637.525  | 9.45     | 0.985177052 | 0.8276  | 1.022  |
| 99640_at   | 848.5   | 907.3  | 1009.6  | 1042.8  | 726.3   | 722.2   | 803.1   | 984.5   | 0.113637201 | 952.05   | 809.025  | 143.025  | 1.176786873 | 0.1015  | -1.182 |
| 99641_at   | 378.3   | 489.6  | 332.8   | 369.3   | 392.9   | 358.9   | 229.3   | 326     | 0.227197637 | 392.5    | 326.775  | 65.725   | 1.201132278 | 0.2285  | -1.212 |
| 99642_i_at | 2850.6  | 3115.9 | 3680.9  | 5047.2  | 4724.5  | 3658.3  | 5690.7  | 5101.2  | 0.136480785 | 3673.65  | 4793.675 | 1120.025 | 0.76635358  | 0.1271  | 1.32   |
| 99643_f_at | 3339    | 3948.2 | 4337.9  | 5407    | 6102.6  | 4630.5  | 5937.2  | 5599.8  | 0.056236063 | 4258.025 | 5567.525 | 1309.5   | 0.764796745 | 0.05708 | 1.32   |
| 99644_at   | 868     | 755.3  | 1016.5  | 1094    | 890.2   | 1325.2  | 1058.4  | 1168.6  | 0.188299269 | 933.45   | 1110.6   | 177.15   | 0.840491626 | 0.1917  | 1.189  |
| 99645_at   | 1160.6  | 1151.2 | 1653.1  | 1700.1  | 1392.1  | 1338.8  | 1520.1  | 1842.4  | 0.591659525 | 1416.25  | 1523.35  | 107.1    | 0.929694423 | 0.5467  | 1.086  |
| 99646_at   | 13.8    | 12.8   | 6.7     | 11.2    | 10.1    | 8.9     | 13      | 12.6    | 0.989756364 | 11.125   | 11.15    | 0.025    | 0.997757848 | 0.8947  | -1.026 |
| 99647_at   | 204.4   | 181.2  | 158.4   | 169.5   | 189.7   | 266.3   | 203.6   | 179.4   | 0.217350331 | 178.375  | 209.75   | 31.375   | 0.850417163 | 0.1842  | 1.167  |
| 99648_at   | 76.2    | 36.3   | 45.8    | 60.1    | 52.2    | 71.4    | 29.7    | 42.4    | 0.66263092  | 54.6     | 48.925   | 5.675    | 1.115993868 | 0.6388  | -1.129 |
| 99649_at   | 322.5   | 287.4  | 398.1   | 394.5   | 324.6   | 340.8   | 353.3   | 405.6   | 0.873146447 | 350.625  | 356.075  | 5.45     | 0.984694236 | 0.8262  | 1.022  |
| 99650_at   | 1704    | 1948.4 | 2382.6  | 2878.5  | 1909.6  | 1653.6  | 2453.8  | 2606.6  | 0.839380223 | 2228.375 | 2155.9   | 72.475   | 1.033617051 | 0.8547  | 1.03   |
| 99651_at   | 977.3   | 867.5  | 837.5   | 974.7   | 907.7   | 849.7   | 767.9   | 859.7   | 0.195227468 | 914.25   | 846.25   | 68       | 1.080354505 | 0.197   | -1.08  |



|            |         |         |         |         |         |         |         |         |             |           |          |          |             |         |        |
|------------|---------|---------|---------|---------|---------|---------|---------|---------|-------------|-----------|----------|----------|-------------|---------|--------|
| 99652_at   | 1467.9  | 1375.7  | 1136.9  | 954.5   | 1252.2  | 1462.8  | 893.3   | 1182.5  | 0.834734327 | 1233.75   | 1197.7   | 36.05    | 1.030099357 | 0.8334  | -1.032 |
| 99653_at   | 905.3   | 985.1   | 645     | 762.4   | 739.2   | 1000.5  | 772.1   | 876.3   | 0.82192684  | 824.45    | 847.025  | 22.575   | 0.973347894 | 0.7861  | 1.034  |
| 99654_s_at | 77.1    | 141.2   | 74.9    | 81.4    | 92.6    | 60      | 96.7    | 110.2   | 0.851074887 | 93.65     | 89.875   | 3.775    | 1.042002782 | 0.8911  | -1.029 |
| 99655_at   | 1895.5  | 2612.9  | 2708.8  | 2831.8  | 3413    | 2806.8  | 2973.3  | 3645.3  | 0.050786077 | 2512.25   | 3209.6   | 697.35   | 0.782729935 | 0.06162 | 1.286  |
| 99656_at   | 659.6   | 701     | 583.9   | 609.2   | 601.4   | 759     | 582.7   | 631.6   | 0.916246136 | 638.425   | 643.675  | 5.25     | 0.99184371  | 0.9435  | 1.005  |
| 99657_at   | 52.8    | 44.8    | 15.8    | 29.7    | 39.2    | 77.1    | 38      | 39.7    | 0.351672593 | 35.775    | 48.5     | 12.725   | 0.737628866 | 0.3093  | 1.425  |
| 99658_f_at | 407.6   | 735.2   | 801.5   | 789.6   | 792.7   | 662.1   | 719     | 731.1   | 0.684870943 | 683.475   | 726.225  | 42.75    | 0.941133946 | 0.5926  | 1.098  |
| 99659_r_at | 11.4    | 5.8     | 18.2    | 12.9    | 26.1    | 30.4    | 18.7    | 21.3    | 0.016143787 | 12.075    | 24.125   | 12.05    | 0.500518135 | 0.02846 | 2.125  |
| 99660_f_at | 16312.1 | 19197.3 | 11815.7 | 13268.4 | 15660.3 | 14416.4 | 15051.9 | 14464.8 | 0.8898733   | 15148.375 | 14898.35 | 250.025  | 1.01678206  | 0.998   | 1      |
| 99661_r_at | 14567.8 | 12833.7 | 8140.8  | 7489.1  | 8815.7  | 12632.3 | 7173.4  | 7522.3  | 0.455288592 | 10757.85  | 9035.925 | 1721.925 | 1.190564331 | 0.4721  | -1.174 |
| 99662_at   | 639.8   | 581.4   | 845.9   | 552.2   | 695     | 449.6   | 637.7   | 467.5   | 0.345538624 | 654.825   | 562.45   | 92.375   | 1.164236821 | 0.3236  | -1.169 |
| 99663_g_at | 1428.5  | 1231.7  | 1360.4  | 1146.7  | 1362    | 1345.7  | 1114    | 1173.8  | 0.644798733 | 1291.825  | 1248.875 | 42.95    | 1.034390952 | 0.6461  | -1.035 |
| 99664_at   | 13.1    | 66.9    | 10.1    | 6.9     | 10.7    | 17.3    | 28.4    | 62.8    | 0.773365648 | 24.25     | 29.8     | 5.55     | 0.813758389 | 0.524   | 1.528  |
| 99665_at   | 149.3   | 181.9   | 170.7   | 187.6   | 221.6   | 237     | 151.6   | 256.9   | 0.146702588 | 172.375   | 216.775  | 44.4     | 0.795179333 | 0.1441  | 1.238  |
| 99666_at   | 1588.5  | 1309    | 2005.4  | 1670.8  | 1623.3  | 1670.2  | 1930.3  | 1838.2  | 0.485023435 | 1643.425  | 1765.5   | 122.075  | 0.930855282 | 0.4358  | 1.084  |
| 99667_at   | 91.6    | 193.7   | 143.8   | 116.6   | 210.4   | 167     | 128.5   | 144.4   | 0.390784501 | 136.425   | 162.575  | 26.15    | 0.839151161 | 0.3443  | 1.217  |
| 99668_at   | 2060.5  | 2039.5  | 1937.6  | 1614.9  | 2167.9  | 2232    | 1581.3  | 1738.2  | 0.933207443 | 1913.125  | 1929.85  | 16.725   | 0.991333523 | 0.9786  | 1.003  |
| 99669_at   | 16712.2 | 18547.1 | 11477.7 | 12417.8 | 14032.2 | 14234.3 | 14963   | 14237.7 | 0.820175127 | 14788.7   | 14366.8  | 421.9    | 1.029366317 | 0.9382  | 1.009  |
| 99670_at   | 394.6   | 395.6   | 297     | 258.8   | 341.4   | 337.3   | 268.7   | 332     | 0.687561068 | 336.5     | 319.85   | 16.65    | 1.052055651 | 0.7575  | -1.04  |
| 99671_at   | 11.3    | 12.9    | 48.7    | 6.7     | 11      | 13.8    | 7.5     | 13.4    | 0.448155614 | 19.9      | 11.425   | 8.475    | 1.741794311 | 0.5476  | -1.327 |
| 99672_at   | 720.3   | 641     | 635.3   | 638.9   | 759.5   | 793.2   | 772.2   | 671.9   | 0.038731855 | 658.875   | 749.2    | 90.325   | 0.879438067 | 0.03619 | 1.136  |
| 99674_at   | 815.4   | 806     | 724.8   | 758.5   | 754.5   | 628.7   | 536     | 819.4   | 0.249004474 | 776.175   | 684.65   | 91.525   | 1.133681443 | 0.2132  | -1.148 |
| 99675_at   | 887.4   | 857.9   | 886.7   | 748.1   | 1019.7  | 1085.8  | 803.5   | 843.9   | 0.280118151 | 845.025   | 938.225  | 93.2     | 0.900663487 | 0.2784  | 1.104  |
| 99677_at   | 454.7   | 544.4   | 410.9   | 351.9   | 524.9   | 564.5   | 369.5   | 469.6   | 0.503822911 | 440.475   | 482.125  | 41.65    | 0.913611615 | 0.5128  | 1.095  |
| 99678_f_at | 118.2   | 110.8   | 82.2    | 136.7   | 90.2    | 159.9   | 103.4   | 142.9   | 0.567284489 | 111.975   | 124.1    | 12.125   | 0.902296535 | 0.6088  | 1.097  |
| 99681_at   | 64.8    | 25.5    | 28.4    | 43.7    | 19.3    | 42.4    | 52.6    | 41      | 0.881713417 | 40.6      | 38.825   | 1.775    | 1.045717965 | 0.9067  | 1.038  |
| 99699_at   | 20.4    | 4.5     | 6.5     | 5       | 4.3     | 28.4    | 5.8     | 6.5     | 0.76662513  | 9.1       | 11.25    | 2.15     | 0.808888889 | 0.851   | 1.113  |
| 99700_at   | 73.4    | 45.8    | 11      | 49.8    | 45.7    | 71.9    | 56      | 45.5    | 0.528749884 | 45        | 54.775   | 9.775    | 0.821542675 | 0.4122  | 1.46   |
| 99701_f_at | 256     | 287.1   | 337     | 248.8   | 227.1   | 307.6   | 266.1   | 277.1   | 0.642572586 | 282.225   | 269.475  | 12.75    | 1.047314222 | 0.6477  | -1.046 |
| 99702_at   | 40.9    | 49      | 33.9    | 39.6    | 12.9    | 48.7    | 29.4    | 59.8    | 0.787567646 | 40.85     | 37.7     | 3.15     | 1.083554377 | 0.5494  | -1.248 |
| 99708_at   | 13.4    | 23.8    | 10.1    | 11.2    | 13.7    | 27.4    | 27.8    | 80      | 0.220608932 | 14.625    | 37.225   | 22.6     | 0.392881128 | 0.105   | 2.189  |
| 99756_at   | 214.1   | 193.4   | 183.7   | 233.6   | 165.6   | 305.3   | 202.8   | 283.2   | 0.400751331 | 206.2     | 239.225  | 33.025   | 0.861950047 | 0.453   | 1.131  |
| 99776_at   | 14.2    | 13.2    | 6.3     | 12      | 11.6    | 21.5    | 10.7    | 10.2    | 0.545721054 | 11.425    | 13.5     | 2.075    | 0.846296296 | 0.5475  | 1.175  |
| 99777_s_at | 87.1    | 107.2   | 132.5   | 129     | 92.6    | 87.7    | 109.9   | 118.6   | 0.398563699 | 113.95    | 102.2    | 11.75    | 1.114970646 | 0.4255  | -1.108 |
| 99778_at   | 1394.1  | 1515.6  | 1121.1  | 1321.5  | 1600.1  | 1555    | 1307.4  | 1554.8  | 0.170411391 | 1338.075  | 1504.325 | 166.25   | 0.889485317 | 0.1778  | 1.127  |
| 99779_at   | 101.3   | 85.3    | 71.5    | 83.7    | 77.9    | 109.2   | 97.5    | 78.8    | 0.600900239 | 85.45     | 90.85    | 5.4      | 0.940561365 | 0.6118  | 1.06   |
| 99798_at   | 23.3    | 32.1    | 19.9    | 34.4    | 11.9    | 51.3    | 23.6    | 40.2    | 0.669478215 | 27.425    | 31.75    | 4.325    | 0.863779528 | 0.9324  | 1.031  |
| 99799_at   | 38.1    | 34.3    | 22.7    | 45.2    | 36.7    | 35.5    | 42.4    | 25.6    | 0.996743942 | 35.075    | 35.05    | 0.025    | 1.000713267 | 0.9414  | 1.014  |
| 99800_at   | 11.4    | 11.4    | 19.8    | 30      | 10.2    | 9.3     | 33.4    | 36.1    | 0.649399036 | 18.15     | 22.25    | 4.1      | 0.815730337 | 0.8303  | 1.103  |
| 99801_at   | 27.6    | 10.4    | 31      | 40.4    | 19.8    | 50.6    | 17.9    | 36.9    | 0.705518476 | 27.35     | 31.3     | 3.95     | 0.873801917 | 0.7087  | 1.164  |
| 99802_at   | 23.8    | 13.6    | 14.3    | 16.3    | 12.8    | 25.7    | 14.5    | 15.8    | 0.958991815 | 17        | 17.2     | 0.2      | 0.988372093 | 0.9927  | 1.002  |
| 99803_at   | 19.8    | 17.3    | 8.3     | 14.7    | 6.9     | 10.5    | 15.8    | 16.5    | 0.46870841  | 15.025    | 12.425   | 2.6      | 1.209255533 | 0.5104  | -1.216 |
| 99804_at   | 161     | 65.9    | 86.8    | 106     | 74.7    | 177     | 66.4    | 108.1   | 0.9616822   | 104.925   | 106.55   | 1.625    | 0.984748944 | 0.9812  | 1.007  |
| 99805_at   | 60.5    | 21.4    | 16.6    | 24      | 21.8    | 32.4    | 27.9    | 29.1    | 0.800514548 | 30.625    | 27.8     | 2.825    | 1.101618705 | 0.9311  | 1.027  |
| 99806_at   | 20.5    | 37.9    | 36.4    | 20      | 30.7    | 25.4    | 73.9    | 30.6    | 0.404617149 | 28.7      | 40.15    | 11.45    | 0.714819427 | 0.3756  | 1.329  |
| 99807_r_at | 212.4   | 109.6   | 129.9   | 117.5   | 50.4    | 249.4   | 157.9   | 76.4    | 0.869495711 | 142.35    | 133.525  | 8.825    | 1.066092492 | 0.6034  | -1.237 |
| 99808_at   | 55.6    | 64.7    | 41.1    | 45.4    | 41.6    | 110.4   | 51.7    | 44      | 0.586019295 | 51.7      | 61.925   | 10.225   | 0.834880904 | 0.6693  | 1.118  |
| 99809_at   | 99.9    | 81.1    | 67.9    | 75.6    | 52.5    | 133.7   | 68.3    | 84.9    | 0.853273082 | 81.125    | 84.85    | 3.725    | 0.956098998 | 0.9822  | 1.005  |
| 99810_at   | 159.6   | 138.6   | 92.1    | 125.7   | 97.5    | 160.6   | 110.3   | 121.3   | 0.749180698 | 129       | 122.425  | 6.575    | 1.053706351 | 0.7613  | -1.051 |
| 99811_at   | 47.5    | 26.7    | 19.7    | 30.4    | 35.1    | 73.8    | 20.3    | 35.9    | 0.467336027 | 31.075    | 41.275   | 10.2     | 0.752877044 | 0.5062  | 1.255  |
| 99812_at   | 25      | 38.3    | 33.7    | 32.1    | 37.1    | 43.8    | 41.9    | 31.1    | 0.168000244 | 32.275    | 38.475   | 6.2      | 0.8388564   | 0.1772  | 1.197  |
| 99813_g_at | 12.4    | 26.7    | 17.1    | 12.1    | 16.6    | 36      | 16.3    | 23.5    | 0.337022056 | 17.075    | 23.1     | 6.025    | 0.739177489 | 0.2928  | 1.353  |
| 99814_at   | 10.7    | 4.6     | 4       | 7.2     | 4.7     | 5.9     | 5.8     | 4.9     | 0.460571661 | 6.625     | 5.325    | 1.3      | 1.244131455 | 0.5655  | -1.153 |
| 99815_at   | 110     | 97.9    | 64.6    | 73      | 58.2    | 131.8   | 64      | 121.2   | 0.747938776 | 86.375    | 93.8     | 7.425    | 0.920842217 | 0.8767  | 1.041  |
| 99816_at   | 109.7   | 98.5    | 119.4   | 145.5   | 104.3   | 70.1    | 154.6   | 130     | 0.87174659  | 118.275   | 114.75   | 3.525    | 1.030718954 | 0.7584  | -1.063 |
| 99817_at   | 38.2    | 28.8    | 20.5    | 71.3    | 19.8    | 43.1    | 56.4    | 35.4    | 0.942281592 | 39.7      | 38.675   | 1.025    | 1.026502909 | 0.9671  | 1.015  |



|            |        |         |        |        |        |        |         |         |             |          |          |         |             |          |        |
|------------|--------|---------|--------|--------|--------|--------|---------|---------|-------------|----------|----------|---------|-------------|----------|--------|
| 99818_at   | 11.4   | 3.9     | 18.5   | 8.1    | 5.7    | 13.2   | 11.8    | 9.3     | 0.89766645  | 10.475   | 10       | 0.475   | 1.0475      | 0.8876   | 1.057  |
| 99819_at   | 42.7   | 31.1    | 19.1   | 36     | 22.6   | 136.4  | 25.3    | 100.7   | 0.262207542 | 32.225   | 71.25    | 39.025  | 0.452280702 | 0.3197   | 1.711  |
| 99820_f_at | 363.5  | 292.8   | 252    | 330.2  | 240.3  | 265.1  | 246.7   | 248.6   | 0.08692981  | 309.625  | 250.175  | 59.45   | 1.237633656 | 0.04642  | -1.227 |
| 99821_at   | 3.2    | 3.9     | 2.3    | 2.7    | 2      | 3.3    | 1.9     | 3.4     | 0.508026903 | 3.025    | 2.65     | 0.375   | 1.141509434 | 0.5016   | -1.149 |
| 99823_r_at | 113.6  | 142.9   | 67.1   | 98.6   | 81.4   | 168.6  | 96.7    | 90.9    | 0.885020166 | 105.55   | 109.4    | 3.85    | 0.964808044 | 0.9034   | 1.029  |
| 99824_at   | 28.1   | 27.1    | 23.9   | 29.7   | 38.3   | 41.8   | 36.9    | 34.2    | 0.002209714 | 27.2     | 37.8     | 10.6    | 0.71957672  | 0.00188  | 1.391  |
| 99825_at   | 244    | 195.3   | 234.2  | 269.4  | 187.1  | 330.8  | 270.6   | 252.6   | 0.497887461 | 235.725  | 260.275  | 24.55   | 0.905676688 | 0.5531   | 1.089  |
| 99826_at   | 5.4    | 4       | 0.5    | 0.6    | 3.1    | 10     | 3.6     | 0.9     | 0.476966904 | 2.625    | 4.4      | 1.775   | 0.596590909 | 0.4203   | 2.012  |
| 99827_at   | 29.4   | 56.1    | 12.4   | 53.6   | 39.4   | 93.9   | 14.1    | 60.4    | 0.509725042 | 37.875   | 51.95    | 14.075  | 0.72906641  | 0.6401   | 1.302  |
| 99828_at   | 138.8  | 163.7   | 157.5  | 173.6  | 256    | 156.4  | 238.6   | 197.2   | 0.090576741 | 158.4    | 212.05   | 53.65   | 0.746993634 | 0.0603   | 1.32   |
| 99829_at   | 16.7   | 6.6     | 11.5   | 4.8    | 26.9   | 10.2   | 12.7    | 9.3     | 0.364012875 | 9.9      | 14.775   | 4.875   | 0.670050761 | 0.2981   | 1.522  |
| 99830_at   | 26.8   | 7.7     | 17.4   | 21     | 21.1   | 14.2   | 16.6    | 22.6    | 0.932463934 | 18.225   | 18.625   | 0.4     | 0.97852349  | 0.7464   | 1.103  |
| 99831_at   | 149.7  | 101.5   | 88.9   | 113.3  | 116.7  | 173.4  | 120.7   | 158.7   | 0.18132579  | 113.35   | 142.375  | 29.025  | 0.796136962 | 0.168    | 1.262  |
| 99832_at   | 14.6   | 7.1     | 23.8   | 13.2   | 12.1   | 16.2   | 10      | 13      | 0.64299108  | 14.675   | 12.825   | 1.85    | 1.144249513 | 0.823    | -1.064 |
| 99833_at   | 81.1   | 59.7    | 78.1   | 86.3   | 80.1   | 125.7  | 74.4    | 89.1    | 0.275961858 | 76.3     | 92.325   | 16.025  | 0.826428378 | 0.254    | 1.196  |
| 99834_at   | 3.6    | 4.6     | 9      | 5.7    | 4.7    | 2.9    | 11.5    | 3       | 0.935558585 | 5.725    | 5.525    | 0.2     | 1.036199095 | 0.7008   | -1.164 |
| 99835_at   | 75.4   | 11.8    | 7.2    | 70.8   | 18.9   | 11.8   | 8.2     | 7.5     | 0.204955321 | 41.3     | 11.6     | 29.7    | 3.560344828 | 0.2219   | -2.399 |
| 99836_at   | 46.8   | 22.9    | 22.4   | 25.2   | 21.2   | 31.5   | 47.4    | 57.2    | 0.356769288 | 29.325   | 39.325   | 10      | 0.745708837 | 0.3671   | 1.315  |
| 99837_at   | 151.7  | 117.9   | 86.9   | 72.7   | 105.9  | 177.2  | 66.1    | 95.7    | 0.898423685 | 107.3    | 111.225  | 3.925   | 0.964711171 | 0.9642   | 1.012  |
| 99838_at   | 10.8   | 31.4    | 24.3   | 8.2    | 16.8   | 42.1   | 36.2    | 26.5    | 0.185002879 | 18.675   | 30.4     | 11.725  | 0.614309211 | 0.1785   | 1.782  |
| 99839_at   | 10.1   | 18      | 10     | 6.6    | 17.6   | 12.4   | 7.6     | 21.7    | 0.388043755 | 11.175   | 14.825   | 3.65    | 0.753794266 | 0.4107   | 1.315  |
| 99840_at   | 303.5  | 292.5   | 328    | 242.2  | 350.6  | 217.7  | 153.9   | 257.2   | 0.356085637 | 291.55   | 244.85   | 46.7    | 1.190729018 | 0.2912   | -1.236 |
| 99841_at   | 12.8   | 20.1    | 11.2   | 16.4   | 11.9   | 8.4    | 12.5    | 7.9     | 0.086024286 | 15.125   | 10.175   | 4.95    | 1.486486486 | 0.06845  | -1.477 |
| 99842_at   | 69.7   | 46.1    | 51.3   | 52.9   | 49.9   | 103.9  | 48.2    | 52.2    | 0.586123258 | 55       | 63.55    | 8.55    | 0.865460268 | 0.6381   | 1.106  |
| 99843_at   | 43.1   | 87.9    | 32.2   | 38.5   | 42.1   | 51     | 51.7    | 30.1    | 0.649816637 | 50.425   | 43.725   | 6.7     | 1.153230417 | 0.75     | -1.088 |
| 99844_at   | 129    | 164.4   | 102.6  | 104    | 110.7  | 123.8  | 105.9   | 97.2    | 0.372846709 | 125      | 109.4    | 15.6    | 1.142595978 | 0.3678   | -1.126 |
| 99845_at   | 483.3  | 395.3   | 531.3  | 463    | 132    | 40.3   | 150.6   | 197.8   | 0.000265771 | 468.225  | 130.175  | 338.05  | 3.596888804 | 0.007206 | -4.149 |
| 99846_at   | 4.5    | 4.4     | 2.5    | 2.8    | 1.9    | 14.3   | 1.8     | 0.9     | 0.739930822 | 3.55     | 4.725    | 1.175   | 0.751322751 | 0.6717   | -1.315 |
| 99847_at   | 317.2  | 179.6   | 227.7  | 191.1  | 191.7  | 246    | 233.5   | 303.2   | 0.718526254 | 228.9    | 243.6    | 14.7    | 0.939655172 | 0.6561   | 1.077  |
| 99848_at   | 64.5   | 30.5    | 14.5   | 19.4   | 31.3   | 54.6   | 18.4    | 27.6    | 0.958186005 | 32.225   | 32.975   | 0.75    | 0.977255497 | 0.7889   | 1.117  |
| 99849_at   | 8257.5 | 10384.3 | 8900   | 9834.6 | 9218.6 | 9240.5 | 11868.9 | 12143.4 | 0.231964683 | 9344.1   | 10617.85 | 1273.75 | 0.880036919 | 0.228    | 1.131  |
| 99850_at   | 35.5   | 29.5    | 9.9    | 37.9   | 29.1   | 22.4   | 26.9    | 40.8    | 0.838745242 | 28.2     | 29.8     | 1.6     | 0.946308725 | 0.6731   | 1.161  |
| 99851_at   | 1578.2 | 1761.6  | 1257.5 | 1321.4 | 1465.7 | 1457.1 | 1396.9  | 1352.1  | 0.6387795   | 1479.675 | 1417.95  | 61.725  | 1.043531154 | 0.6881   | -1.035 |
| 99854_at   | 5.7    | 1.5     | 8      | 5.3    | 6.6    | 4.2    | 2.7     | 11.7    | 0.642291579 | 5.125    | 6.3      | 1.175   | 0.813492063 | 0.6551   | 1.252  |
| 99855_at   | 95.8   | 110.7   | 148.8  | 165.4  | 109.4  | 166.2  | 156.6   | 239.2   | 0.28382096  | 130.175  | 167.85   | 37.675  | 0.77554364  | 0.2851   | 1.271  |
| 99856_r_at | 204.5  | 135     | 174.6  | 182.2  | 155.2  | 242.1  | 117.6   | 151.9   | 0.817667799 | 174.075  | 166.7    | 7.375   | 1.044241152 | 0.7118   | -1.07  |
| 99860_at   | 24.6   | 9.4     | 27.4   | 24     | 18     | 42.4   | 34.9    | 23.5    | 0.271509059 | 21.35    | 29.7     | 8.35    | 0.718855219 | 0.3051   | 1.425  |
| 99861_at   | 2102.4 | 1374.6  | 1617.1 | 1375   | 940.2  | 1455.2 | 1273.7  | 1224.9  | 0.108478843 | 1617.275 | 1223.5   | 393.775 | 1.321843073 | 0.08867  | -1.317 |
| 99862_at   | 155.3  | 176.9   | 147.1  | 192.3  | 127.1  | 123.8  | 94.1    | 130.7   | 0.010942792 | 167.9    | 118.925  | 48.975  | 1.411814169 | 0.0119   | -1.415 |
| 99863_at   | 8.4    | 8.1     | 8.8    | 8.7    | 16.9   | 38.2   | 21      | 39.7    | 0.039409935 | 8.5      | 28.95    | 20.45   | 0.293609672 | 0.001668 | 3.185  |
| 99864_at   | 33.5   | 36.9    | 30.9   | 37.8   | 32.1   | 17     | 12.3    | 34.2    | 0.137501491 | 34.775   | 23.9     | 10.875  | 1.455020921 | 0.1191   | -1.582 |
| 99865_at   | 106.2  | 111.3   | 143.3  | 123.7  | 86.4   | 166.2  | 168.1   | 137.4   | 0.424539965 | 121.125  | 139.525  | 18.4    | 0.868123992 | 0.5227   | 1.122  |
| 99866_at   | 227.5  | 183.2   | 130.8  | 211.6  | 150.1  | 247.8  | 301     | 287.3   | 0.206054667 | 188.275  | 246.55   | 58.275  | 0.763638207 | 0.2497   | 1.292  |
| 99867_at   | 9.9    | 14.4    | 5.9    | 6.5    | 3.6    | 8      | 6.2     | 4.6     | 0.16958363  | 9.175    | 5.6      | 3.575   | 1.638392857 | 0.1302   | -1.603 |
| 99868_at   | 4.1    | 1       | 10.4   | 7.2    | 2.8    | 18.1   | 20.1    | 15.7    | 0.116900813 | 5.675    | 14.175   | 8.5     | 0.400352734 | 0.203    | 2.717  |
| 99869_at   | 10.2   | 11.8    | 8.8    | 7.3    | 24.8   | 15.7   | 7.3     | 10      | 0.295827062 | 9.525    | 14.45    | 4.925   | 0.65916955  | 0.2994   | 1.386  |
| 99870_at   | 49.1   | 21.4    | 2.5    | 29.9   | 34.4   | 60     | 40.6    | 24.1    | 0.298177123 | 25.725   | 39.775   | 14.05   | 0.646763042 | 0.2795   | 2.25   |
| 99871_f_at | 161.8  | 102.6   | 68.7   | 128.9  | 81     | 196.3  | 32.7    | 137.9   | 0.934264331 | 115.5    | 111.975  | 3.525   | 1.031480241 | 0.6915   | -1.196 |
| 99872_s_at | 9657.2 | 10376.8 | 8517.1 | 7769.8 | 8883.8 | 9310.8 | 9238.8  | 9301.6  | 0.871201834 | 9080.225 | 9183.75  | 103.525 | 0.988727372 | 0.7997   | 1.017  |
| 99873_at   | 12.9   | 13.3    | 11.3   | 10.1   | 9.9    | 18.1   | 11.3    | 12.6    | 0.609332015 | 11.9     | 12.975   | 1.075   | 0.917148362 | 0.6485   | 1.072  |
| 99874_at   | 145.2  | 100.3   | 115    | 201.4  | 140.9  | 196.5  | 216     | 162.9   | 0.220313043 | 140.475  | 179.075  | 38.6    | 0.784447857 | 0.1912   | 1.304  |
| 99875_at   | 184.3  | 178.8   | 138.9  | 165.4  | 170.4  | 180.1  | 195.3   | 122.1   | 0.994940576 | 166.85   | 166.975  | 0.125   | 0.999251385 | 0.9458   | 1.009  |
| 99876_at   | 21.8   | 37.5    | 17.2   | 21     | 20.8   | 31.1   | 20.3    | 30.5    | 0.818257345 | 24.375   | 25.675   | 1.3     | 0.949367089 | 0.7284   | 1.077  |
| 99878_at   | 121.4  | 81.4    | 101.6  | 105    | 73     | 138.9  | 149.3   | 105.8   | 0.490910167 | 102.35   | 116.75   | 14.4    | 0.876659529 | 0.5866   | 1.11   |
| 99880_at   | 26.1   | 26.9    | 69     | 26.6   | 14.5   | 19.6   | 20      | 55.5    | 0.518697921 | 37.15    | 27.4     | 9.75    | 1.355839416 | 0.3895   | -1.42  |
| 99881_at   | 6.8    | 5.1     | 2.1    | 9.4    | 4.3    | 19.1   | 4.6     | 12.9    | 0.321730153 | 5.85     | 10.225   | 4.375   | 0.572127139 | 0.3604   | 1.634  |



|            |        |        |        |        |        |       |        |        |             |          |          |         |             |          |        |
|------------|--------|--------|--------|--------|--------|-------|--------|--------|-------------|----------|----------|---------|-------------|----------|--------|
| 99882_at   | 74.4   | 53.1   | 45.7   | 56.9   | 34.7   | 50.7  | 60     | 77     | 0.864307102 | 57.525   | 55.6     | 1.925   | 1.034622302 | 0.7753   | -1.06  |
| 99883_g_at | 265.4  | 168.4  | 109.7  | 163.4  | 91.1   | 304.2 | 243.7  | 203.5  | 0.564982841 | 176.725  | 210.625  | 33.9    | 0.839050445 | 0.6868   | 1.144  |
| 99884_at   | 4.6    | 4.1    | 4.8    | 1.7    | 2.4    | 13    | 16.6   | 2.8    | 0.267864949 | 3.8      | 8.7      | 4.9     | 0.436781609 | 0.355    | 1.754  |
| 99885_at   | 4.3    | 7.6    | 6.1    | 3.4    | 1.7    | 3.4   | 16.6   | 15.2   | 0.396416845 | 5.35     | 9.225    | 3.875   | 0.579945799 | 0.7575   | 1.21   |
| 99886_at   | 54.6   | 22.8   | 30.5   | 30.9   | 24.4   | 59.8  | 15.5   | 16.9   | 0.674329733 | 34.7     | 29.15    | 5.55    | 1.190394511 | 0.4636   | -1.324 |
| 99887_at   | 32.6   | 22.1   | 26     | 34.1   | 21.5   | 40.7  | 33.8   | 29.6   | 0.60410358  | 28.7     | 31.4     | 2.7     | 0.914012739 | 0.6581   | 1.081  |
| 99888_at   | 233.9  | 141.9  | 133.5  | 176.7  | 127.1  | 246.2 | 161.7  | 178.3  | 0.846918682 | 171.5    | 178.325  | 6.825   | 0.961727184 | 0.8558   | 1.036  |
| 99889_at   | 44.2   | 30.9   | 58.6   | 48     | 55.3   | 65.7  | 51.1   | 46     | 0.250563722 | 45.425   | 54.525   | 9.1     | 0.833104081 | 0.2393   | 1.222  |
| 99890_at   | 119.8  | 87.4   | 113    | 111.2  | 51.9   | 47.8  | 60.7   | 72.1   | 0.001732123 | 107.85   | 58.125   | 49.725  | 1.855483871 | 0.001568 | -1.866 |
| 99891_at   | 46.8   | 20.4   | 25.8   | 37.3   | 8.4    | 58.7  | 37.5   | 52.3   | 0.62385856  | 32.575   | 39.225   | 6.65    | 0.830465264 | 0.9789   | 1.013  |
| 99892_at   | 18.3   | 14.6   | 13.2   | 8.3    | 13.2   | 21.3  | 11.6   | 15.6   | 0.560787548 | 13.6     | 15.425   | 1.825   | 0.881685575 | 0.5423   | 1.147  |
| 99893_at   | 34.8   | 47.3   | 74.3   | 88     | 14.8   | 38.3  | 30.4   | 30.6   | 0.068939814 | 61.1     | 28.525   | 32.575  | 2.141980719 | 0.04356  | -2.126 |
| 99894_at   | 52.5   | 38.5   | 81.1   | 52.7   | 59.5   | 52.6  | 56.9   | 42.2   | 0.743866319 | 56.2     | 52.8     | 3.4     | 1.064393939 | 0.8449   | -1.036 |
| 99895_at   | 20.3   | 17.2   | 14     | 21.3   | 13.6   | 24.3  | 16.4   | 16.8   | 0.885668237 | 18.2     | 17.775   | 0.425   | 1.023909986 | 0.8401   | -1.033 |
| 99896_at   | 187.5  | 113.3  | 97.5   | 133.6  | 134.3  | 154.8 | 119.7  | 118.8  | 0.962216601 | 132.975  | 131.9    | 1.075   | 1.008150114 | 0.917    | 1.017  |
| 99897_at   | 43.5   | 54.9   | 69.9   | 93.4   | 89.3   | 96.5  | 62.9   | 84.1   | 0.226536223 | 65.425   | 83.2     | 17.775  | 0.786358173 | 0.2055   | 1.307  |
| 99898_at   | 28     | 24.8   | 16.8   | 25.3   | 25.9   | 36.7  | 30.5   | 24.8   | 0.164506024 | 23.725   | 29.475   | 5.75    | 0.804919423 | 0.1711   | 1.251  |
| 99899_at   | 20.1   | 52.8   | 19.6   | 16.4   | 16.5   | 34.4  | 21.3   | 21.2   | 0.700204048 | 27.225   | 23.35    | 3.875   | 1.165952891 | 0.8225   | -1.074 |
| 99900_at   | 22.5   | 42.7   | 66.9   | 83.1   | 76.9   | 104.9 | 116    | 58.2   | 0.109267487 | 53.8     | 89       | 35.2    | 0.604494382 | 0.1276   | 1.787  |
| 99901_at   | 191.9  | 142.7  | 173.3  | 151.5  | 95.7   | 204.3 | 213.3  | 148.2  | 0.986655616 | 164.85   | 165.375  | 0.525   | 0.996825397 | 0.8534   | -1.039 |
| 99902_at   | 3.5    | 5.2    | 2.1    | 2.3    | 2.3    | 7.4   | 2.2    | 3.1    | 0.752799259 | 3.275    | 3.75     | 0.475   | 0.873333333 | 0.8158   | 1.089  |
| 99903_at   | 29.1   | 8.4    | 23.5   | 30.7   | 20.5   | 37.8  | 19.4   | 26.4   | 0.655816944 | 22.925   | 26.025   | 3.1     | 0.880883766 | 0.5713   | 1.224  |
| 99904_at   | 10.5   | 41.3   | 29.8   | 28.9   | 36.9   | 11    | 16.8   | 46     | 0.996337964 | 27.625   | 27.675   | 0.05    | 0.998193315 | 0.9283   | -1.043 |
| 99905_at   | 15.5   | 40.1   | 16.7   | 4      | 18.6   | 6.5   | 7.3    | 26.4   | 0.645500978 | 19.075   | 14.7     | 4.375   | 1.297619048 | 0.8125   | -1.156 |
| 99906_at   | 19.9   | 64.6   | 92.5   | 83.3   | 72.9   | 55.5  | 62.1   | 90.9   | 0.781827528 | 65.075   | 70.35    | 5.275   | 0.925017768 | 0.5933   | 1.232  |
| 99907_at   | 31.4   | 9.6    | 5.8    | 7.3    | 5.5    | 9.6   | 18.6   | 4.3    | 0.583165485 | 13.525   | 9.5      | 4.025   | 1.423684211 | 0.6038   | -1.312 |
| 99908_at   | 126.2  | 157.7  | 117.8  | 180.7  | 218    | 222   | 154.5  | 163.1  | 0.106812941 | 145.6    | 189.4    | 43.8    | 0.7687434   | 0.1024   | 1.302  |
| 99909_at   | 15.3   | 9.9    | 11.5   | 7.8    | 11.8   | 6.9   | 13     | 14.5   | 0.858544087 | 11.125   | 11.55    | 0.425   | 0.963203463 | 0.8897   | 1.032  |
| 99910_at   | 118.7  | 150    | 161.3  | 219.7  | 126.5  | 174.6 | 148.6  | 208.7  | 0.939692861 | 162.425  | 164.6    | 2.175   | 0.986786148 | 0.9063   | 1.021  |
| 99911_at   | 13.5   | 22.5   | 13     | 11.8   | 14.9   | 21.5  | 44.7   | 11.8   | 0.368743891 | 15.2     | 23.225   | 8.025   | 0.654467169 | 0.362    | 1.379  |
| 99912_at   | 10.4   | 8.1    | 22.5   | 39.1   | 14.5   | 32.5  | 38.9   | 12.8   | 0.646444664 | 20.025   | 24.675   | 4.65    | 0.811550152 | 0.5483   | 1.338  |
| 99913_at   | 175.7  | 163.5  | 120.8  | 145.6  | 97.4   | 172.2 | 130    | 88.2   | 0.245766798 | 151.4    | 121.95   | 29.45   | 1.241492415 | 0.2093   | -1.273 |
| 99914_at   | 53.6   | 18.7   | 18.5   | 27.4   | 30.1   | 31.2  | 9.9    | 4.3    | 0.361355315 | 29.55    | 18.875   | 10.675  | 1.565562914 | 0.2823   | -1.892 |
| 99915_at   | 29.2   | 10.1   | 19.3   | 14.2   | 25     | 28    | 8.1    | 17.3   | 0.825093125 | 18.2     | 19.6     | 1.4     | 0.928571429 | 0.8956   | 1.05   |
| 99916_at   | 22.4   | 27.4   | 51     | 63.9   | 18.1   | 20.1  | 34.4   | 26.5   | 0.195767565 | 41.175   | 24.775   | 16.4    | 1.661957619 | 0.1695   | -1.566 |
| 99917_at   | 727.6  | 905    | 927.5  | 1069.1 | 985    | 664.5 | 885    | 841.5  | 0.537851203 | 907.3    | 844      | 63.3    | 1.075       | 0.5483   | -1.076 |
| 99920_at   | 67.6   | 76.9   | 75.6   | 99.6   | 85.6   | 77.2  | 75.7   | 114.9  | 0.490351403 | 79.925   | 88.35    | 8.425   | 0.904640634 | 0.4778   | 1.1    |
| 99922_at   | 54     | 156.5  | 349.9  | 295.4  | 125.4  | 164.5 | 247.1  | 310    | 0.978818782 | 213.95   | 211.75   | 2.2     | 1.01038961  | 0.7627   | 1.16   |
| 99923_at   | 193.8  | 193.5  | 190.5  | 294.7  | 264.1  | 227.2 | 282.1  | 282.5  | 0.177480958 | 218.125  | 263.975  | 45.85   | 0.82630931  | 0.1333   | 1.228  |
| 99924_at   | 338.1  | 430    | 559.3  | 447.4  | 565.4  | 358.5 | 343.4  | 425.6  | 0.773633008 | 443.7    | 423.225  | 20.475  | 1.048378522 | 0.7483   | -1.053 |
| 99925_f_at | 198.1  | 133    | 189.5  | 231.7  | 157.4  | 151.9 | 146.5  | 231.4  | 0.59033159  | 188.075  | 171.8    | 16.275  | 1.094732247 | 0.5947   | -1.093 |
| 99926_at   | 301.3  | 265.1  | 238.5  | 289.2  | 273.5  | 373.9 | 278.5  | 295.2  | 0.296244039 | 273.525  | 305.275  | 31.75   | 0.895995414 | 0.2793   | 1.111  |
| 99927_at   | 15     | 32.4   | 10.9   | 14.5   | 370.6  | 155.5 | 370.2  | 205.4  | 0.018751738 | 18.2     | 275.425  | 257.225 | 0.066079695 | 0.000138 | 15.47  |
| 99928_at   | 4.4    | 13.3   | 14.1   | 29.8   | 15.9   | 6.7   | 35.2   | 16.5   | 0.704547792 | 15.4     | 18.575   | 3.175   | 0.829071332 | 0.6753   | 1.257  |
| 99929_at   | 938.2  | 979.9  | 925.2  | 884.3  | 803.2  | 783.3 | 904.4  | 807.9  | 0.021103113 | 931.9    | 824.7    | 107.2   | 1.129986662 | 0.01831  | -1.131 |
| 99930_s_at | 310.5  | 282.8  | 289.5  | 373.9  | 315.6  | 310   | 294.4  | 332.8  | 0.967185768 | 314.175  | 313.2    | 0.975   | 1.003113027 | 0.9772   | 1.002  |
| 99931_at   | 194    | 163.6  | 164.5  | 200.9  | 194    | 240.8 | 179.1  | 225.7  | 0.14713796  | 180.75   | 209.9    | 29.15   | 0.861124345 | 0.141    | 1.158  |
| 99932_at   | 70.2   | 298.6  | 163    | 52.1   | 402.1  | 51.3  | 50.9   | 53.4   | 0.952229626 | 145.975  | 139.425  | 6.55    | 1.046978662 | 0.6714   | -1.335 |
| 99933_at   | 844.3  | 636.8  | 894.7  | 732    | 544.8  | 788.4 | 586.3  | 608.4  | 0.116178634 | 776.95   | 631.975  | 144.975 | 1.229399897 | 0.1095   | -1.231 |
| 99934_at   | 914.6  | 776.4  | 1021.3 | 905.9  | 791.5  | 717.7 | 736.5  | 749.5  | 0.047494716 | 904.55   | 748.8    | 155.75  | 1.207999466 | 0.02172  | -1.203 |
| 99935_at   | 1033.3 | 1147.1 | 1291.2 | 1695.3 | 1063.9 | 727.5 | 1141.9 | 1436.6 | 0.36912682  | 1291.725 | 1092.475 | 199.25  | 1.182384036 | 0.352    | -1.196 |
| 99936_at   | 138.9  | 228.1  | 227.5  | 223.9  | 163.6  | 229.8 | 217.6  | 219.7  | 0.911971438 | 204.6    | 207.675  | 3.075   | 0.985193211 | 0.8588   | 1.027  |
| 99937_at   | 39.5   | 41.7   | 39.5   | 42.2   | 35.5   | 14.8  | 40.9   | 53.2   | 0.604833929 | 40.725   | 36.1     | 4.625   | 1.128116343 | 0.4593   | -1.246 |
| 99938_at   | 352.8  | 350.5  | 337.2  | 278.2  | 312.5  | 344.3 | 242.7  | 314.4  | 0.382877362 | 329.675  | 303.475  | 26.2    | 1.086333306 | 0.3917   | -1.09  |
| 99939_at   | 334.9  | 246.9  | 267.4  | 340.5  | 155.3  | 274.2 | 215.9  | 258.8  | 0.092499106 | 297.425  | 226.05   | 71.375  | 1.315748728 | 0.1055   | -1.334 |
| 99940_at   | 833    | 709.6  | 793.8  | 850.2  | 773.9  | 647.8 | 878.2  | 849.3  | 0.88274345  | 796.65   | 787.3    | 9.35    | 1.011876032 | 0.8447   | -1.016 |



|            |       |       |        |        |        |        |        |        |             |         |         |         |             |          |        |
|------------|-------|-------|--------|--------|--------|--------|--------|--------|-------------|---------|---------|---------|-------------|----------|--------|
| 99941_at   | 40.8  | 38.1  | 29.6   | 12.6   | 9      | 33.7   | 37.8   | 43.5   | 0.944133958 | 30.275  | 31      | 0.725   | 0.976612903 | 0.9353   | -1.039 |
| 99942_s_at | 297.7 | 317.2 | 357.7  | 304.4  | 196.9  | 209.7  | 302.1  | 236.5  | 0.029445244 | 319.25  | 236.3   | 82.95   | 1.351036818 | 0.02304  | -1.366 |
| 99944_at   | 64.3  | 33.5  | 75.8   | 63     | 70.7   | 92     | 76.6   | 86.3   | 0.086399492 | 59.15   | 81.4    | 22.25   | 0.726658477 | 0.1077   | 1.429  |
| 99945_at   | 209.8 | 104.8 | 116.3  | 139    | 136.1  | 215.2  | 104.4  | 127.1  | 0.926865643 | 142.475 | 145.7   | 3.225   | 0.977865477 | 0.9211   | 1.023  |
| 99947_at   | 660   | 590.4 | 802.5  | 903.2  | 768.9  | 728.7  | 709.4  | 799.5  | 0.87275756  | 739.025 | 751.625 | 12.6    | 0.983236321 | 0.7766   | 1.03   |
| 99948_at   | 163.5 | 172.5 | 258.6  | 236    | 156.7  | 155.4  | 176.4  | 178.6  | 0.178932576 | 207.65  | 166.775 | 40.875  | 1.245090691 | 0.1416   | -1.224 |
| 99949_at   | 410.8 | 369   | 536.3  | 484.1  | 305    | 401.8  | 373.6  | 377.8  | 0.105383713 | 450.05  | 364.55  | 85.5    | 1.234535729 | 0.09219  | -1.228 |
| 99950_at   | 417.1 | 354.5 | 425.3  | 366.8  | 418.5  | 498.7  | 337.6  | 326.1  | 0.926539777 | 390.925 | 395.225 | 4.3     | 0.989120121 | 0.9932   | 1.001  |
| 99951_at   | 18.3  | 52.4  | 53.4   | 64.6   | 91.7   | 76.3   | 109.8  | 112.7  | 0.008977934 | 47.175  | 97.625  | 50.45   | 0.483226633 | 0.03453  | 2.26   |
| 99952_at   | 5.7   | 12.6  | 5.7    | 7.8    | 26.1   | 9.5    | 5      | 4.5    | 0.569454304 | 7.95    | 11.275  | 3.325   | 0.705099778 | 0.7614   | 1.152  |
| 99953_at   | 345   | 322.6 | 334.4  | 320.7  | 304.7  | 460.6  | 336.6  | 309.6  | 0.589220557 | 330.675 | 352.875 | 22.2    | 0.937088204 | 0.6222   | 1.052  |
| 99954_at   | 861.9 | 745.5 | 767.6  | 822.2  | 664.7  | 1038.7 | 763.6  | 694.1  | 0.924956991 | 799.3   | 790.275 | 9.025   | 1.011420075 | 0.8162   | -1.026 |
| 99955_at   | 326.6 | 335.2 | 515.8  | 524.3  | 453.6  | 341.8  | 519.1  | 520.4  | 0.647678769 | 425.475 | 458.725 | 33.25   | 0.927516486 | 0.6156   | 1.091  |
| 99956_at   | 131.5 | 127.8 | 261    | 246.5  | 210.4  | 181    | 255.1  | 245.7  | 0.471942634 | 191.7   | 223.05  | 31.35   | 0.859448554 | 0.3815   | 1.219  |
| 99957_at   | 99.8  | 86.5  | 144    | 166.8  | 13.2   | 46     | 19.9   | 54     | 0.009615844 | 124.275 | 33.275  | 91      | 3.734785875 | 0.008046 | -4.227 |
| 99958_at   | 567.6 | 489.9 | 432.5  | 233.7  | 213.6  | 487.1  | 421    | 232.5  | 0.385286291 | 430.925 | 338.55  | 92.375  | 1.272854822 | 0.4071   | -1.289 |
| 99959_at   | 134.1 | 96.7  | 219.6  | 267.4  | 185.4  | 120.3  | 181.4  | 198.9  | 0.861145338 | 179.45  | 171.5   | 7.95    | 1.046355685 | 0.959    | 1.014  |
| 99960_at   | 653.1 | 302.9 | 376.1  | 503.7  | 453.5  | 570.8  | 444    | 438.6  | 0.841097375 | 458.95  | 476.725 | 17.775  | 0.962714353 | 0.6933   | 1.077  |
| 99961_s_at | 409.5 | 380.3 | 476.9  | 521.5  | 369    | 390.5  | 474.3  | 433.9  | 0.478806686 | 447.05  | 416.925 | 30.125  | 1.072255202 | 0.4898   | -1.069 |
| 99962_at   | 301   | 287.4 | 454.9  | 452.6  | 389.9  | 274.1  | 377.9  | 393.6  | 0.791770255 | 373.975 | 358.875 | 15.1    | 1.042075932 | 0.8584   | -1.029 |
| 99963_at   | 124.7 | 166.8 | 124    | 120.9  | 192    | 109.8  | 133    | 233.8  | 0.337053646 | 134.1   | 167.15  | 33.05   | 0.802273407 | 0.3607   | 1.204  |
| 99964_at   | 7.2   | 9.6   | 8      | 25.1   | 8.2    | 7.7    | 5.1    | 7.6    | 0.299063773 | 12.475  | 7.15    | 5.325   | 1.744755245 | 0.2018   | -1.547 |
| 99965_at   | 47.1  | 65    | 48.1   | 42.1   | 19.7   | 90.4   | 37     | 18     | 0.62965745  | 50.575  | 41.275  | 9.3     | 1.225317989 | 0.3224   | -1.513 |
| 99966_at   | 15.2  | 8.8   | 10.6   | 11.8   | 8.3    | 14.3   | 11.4   | 10.5   | 0.804362255 | 11.6    | 11.125  | 0.475   | 1.042696629 | 0.812    | -1.041 |
| 99970_at   | 91.4  | 121.2 | 143    | 136.9  | 112.6  | 103.7  | 83.8   | 116.7  | 0.223568295 | 123.125 | 104.2   | 18.925  | 1.181621881 | 0.248    | -1.174 |
| 99972_at   | 28.6  | 31.7  | 30.3   | 27     | 44     | 44.2   | 14.9   | 29.4   | 0.633273246 | 29.4    | 33.125  | 3.725   | 0.88754717  | 0.9001   | 1.034  |
| 99973_s_at | 43.5  | 7.3   | 21.5   | 58.2   | 17.3   | 18     | 18.7   | 7.1    | 0.223768076 | 32.625  | 15.275  | 17.35   | 2.135842881 | 0.3128   | -1.768 |
| 99974_at   | 3.2   | 4.5   | 4.8    | 5.9    | 2.7    | 4.5    | 4.5    | 3.2    | 0.27167508  | 4.6     | 3.725   | 0.875   | 1.234899329 | 0.2599   | -1.244 |
| 99975_at   | 701.7 | 648.7 | 643.7  | 658.6  | 701.1  | 662.9  | 697.4  | 662.6  | 0.334392958 | 663.175 | 681     | 17.825  | 0.973825257 | 0.3266   | 1.027  |
| 99977_at   | 96.2  | 66    | 62.1   | 61.9   | 107.8  | 109.3  | 60.9   | 86.1   | 0.219361207 | 71.55   | 91.025  | 19.475  | 0.786047789 | 0.2273   | 1.261  |
| 99978_s_at | 515.9 | 691   | 1114.5 | 1222.1 | 828.1  | 753.3  | 1101.1 | 996.6  | 0.863715244 | 885.875 | 919.775 | 33.9    | 0.96314316  | 0.7108   | 1.09   |
| 99979_at   | 330.8 | 406.1 | 516.9  | 522.3  | 503.4  | 416    | 684.8  | 552    | 0.241010493 | 444.025 | 539.05  | 95.025  | 0.823717651 | 0.2421   | 1.216  |
| 99980_at   | 122   | 109.2 | 102.9  | 117.5  | 86.7   | 128.6  | 97.5   | 73.3   | 0.265183582 | 112.9   | 96.525  | 16.375  | 1.16964517  | 0.2068   | -1.192 |
| 99981_at   | 52.5  | 31.4  | 63.8   | 83.7   | 58.9   | 74     | 64.5   | 61.6   | 0.581885826 | 57.85   | 64.75   | 6.9     | 0.893436293 | 0.4588   | 1.184  |
| 99982_at   | 460.5 | 335   | 449.1  | 396.2  | 331.9  | 393.6  | 276.9  | 368.9  | 0.129934375 | 410.2   | 342.825 | 67.375  | 1.196528841 | 0.1394   | -1.198 |
| 99984_at   | 93    | 56.4  | 81.3   | 97.3   | 41.8   | 60.5   | 148.9  | 145.4  | 0.594504112 | 82      | 99.15   | 17.15   | 0.827029753 | 0.8456   | 1.072  |
| 99985_at   | 555.2 | 491.7 | 739.2  | 765.4  | 564.2  | 567.8  | 688.1  | 807.1  | 0.838598412 | 637.875 | 656.8   | 18.925  | 0.971186054 | 0.8069   | 1.036  |
| 99986_at   | 435.2 | 327.6 | 411.1  | 396.1  | 210.7  | 388.4  | 405.5  | 298.5  | 0.250239732 | 392.5   | 325.775 | 66.725  | 1.204819277 | 0.2384   | -1.237 |
| 99987_at   | 90.6  | 59.4  | 177.7  | 111.1  | 74.5   | 25.4   | 93.4   | 92.5   | 0.253025249 | 109.7   | 71.45   | 38.25   | 1.535339398 | 0.2695   | -1.597 |
| 99988_at   | 382.1 | 379   | 280.4  | 408    | 405    | 313.1  | 362.8  | 328    | 0.780889449 | 362.375 | 352.225 | 10.15   | 1.028816807 | 0.8261   | -1.024 |
| 99990_at   | 833.6 | 703.3 | 803.9  | 1078.2 | 848.3  | 770.9  | 970.9  | 1049.4 | 0.605696208 | 854.75  | 909.875 | 55.125  | 0.939414755 | 0.5699   | 1.07   |
| 99991_at   | 126.1 | 109.8 | 176.4  | 159.7  | 90.5   | 174.4  | 195.9  | 156.6  | 0.694858783 | 143     | 154.35  | 11.35   | 0.926465824 | 0.7988   | 1.055  |
| 99992_at   | 230.1 | 182.9 | 249.7  | 316.9  | 330.1  | 279.2  | 263.2  | 260.2  | 0.289290473 | 244.9   | 283.175 | 38.275  | 0.864836232 | 0.2518   | 1.173  |
| 99993_at   | 106.1 | 138.4 | 131.4  | 170.2  | 92.9   | 120.4  | 140.5  | 145.4  | 0.534518221 | 136.525 | 124.8   | 11.725  | 1.093950321 | 0.5432   | -1.095 |
| 99994_at   | 411.9 | 348.2 | 357.2  | 386.8  | 70.8   | 98.7   | 40.4   | 92.9   | 5.32279E-06 | 376.025 | 75.7    | 300.325 | 4.967305152 | 0.000206 | -5.245 |
| 99995_at   | 17.2  | 27.7  | 36     | 54.9   | 29.4   | 53.8   | 44.3   | 40.7   | 0.429227874 | 33.95   | 42.05   | 8.1     | 0.807372176 | 0.3496   | 1.319  |
| 99996_at   | 7.3   | 6.4   | 7.3    | 2.8    | 2.8    | 8.9    | 4.8    | 6.8    | 0.943620627 | 5.95    | 5.825   | 0.125   | 1.021459227 | 0.8883   | -1.051 |
| 99997_at   | 197.5 | 214.6 | 129.3  | 163.6  | 169.9  | 208.5  | 128.9  | 154.6  | 0.683969128 | 176.25  | 165.475 | 10.775  | 1.065115576 | 0.7047   | -1.062 |
| 99998_at   | 26.6  | 18.1  | 17.9   | 17.2   | 11.4   | 18.8   | 9.3    | 11.9   | 0.05804228  | 19.95   | 12.85   | 7.1     | 1.552529183 | 0.04406  | -1.582 |
| 99999_at   | 723.6 | 833.8 | 756.1  | 683.3  | 1007.9 | 793.8  | 798.2  | 654    | 0.463634602 | 749.2   | 813.475 | 64.275  | 0.920987123 | 0.4834   | 1.076  |
