# Supplementary material
Source: publisher figshare collection journal article supplement (https://karger.figshare.com/articles/dataset/_/5104510)
Supplement: Supplementary file 2 [file 1 › Suppl_TableS2A.pdf]

| Affymetrix<br>Probe Set ID | WT      | WT      | WT      | WT      | KO      | KO      | KO      | KO      | T-Test (Excel) | Mean WT  | Mean KO  | Delta   | Fold Change<br>P2 (Excel) | T-Test P2 P-   | Fold Change    |
|----------------------------|---------|---------|---------|---------|---------|---------|---------|---------|----------------|----------|----------|---------|---------------------------|----------------|----------------|
|                            | UCF_8_  | UCF_9_  | UCF_10  | UCF_18  | UCF_11  | UCF_12  | UCF_13  | UCF_17  |                |          |          |         |                           | value          | P2             |
|                            | U74Av2_ | U74Av2_ | U74Av2_ | U74Av2_ | U74Av2_ | U74Av2_ | U74Av2_ | U74Av2_ |                |          |          |         |                           | (Expressionist | (Expressionist |
| Signal                     | Signal  | _Signal | _Signal | _Signal | _Signal | _Signal | _Signal | _Signal |                |          |          |         |                           | )              | )              |
| 100001_at                  | 24.1    | 6.9     | 5.4     | 9       | 51.5    | 33.7    | 17.7    | 7.5     | 0.195382128    | 11.35    | 27.6     | 16.25   | 0.411231884               | 0.1408         | 2.377          |
| 100002_at                  | 69.7    | 78.2    | 79.9    | 56.7    | 94.9    | 92.4    | 67.6    | 63.1    | 0.430711525    | 71.125   | 79.5     | 8.375   | 0.894654088               | 0.457          | 1.11           |
| 100003_at                  | 27.5    | 47.7    | 28.3    | 30.8    | 21.1    | 36.2    | 49.2    | 27.6    | 0.995050875    | 33.575   | 33.525   | 0.05    | 1.001491424               | 0.917          | -1.024         |
| 100004_at                  | 333.4   | 282.4   | 319.3   | 323.8   | 236.4   | 324     | 346.4   | 431.2   | 0.662601897    | 314.725  | 334.5    | 19.775  | 0.940881913               | 0.7657         | -1.041         |
| 100005_at                  | 513.3   | 573.6   | 554.1   | 689.2   | 690.5   | 533.7   | 524.4   | 715.5   | 0.61591514     | 582.55   | 616.025  | 33.475  | 0.945659673               | 0.6347         | -1.053         |
| 100006_at                  | 316.4   | 291.3   | 293.1   | 331.7   | 152.4   | 226.9   | 169.4   | 321.1   | 0.094013742    | 308.125  | 217.45   | 90.675  | 1.416992412               | 0.06148        | -1.477         |
| 100007_at                  | 591.7   | 736.1   | 584.5   | 754.5   | 603.8   | 726.2   | 664.1   | 643.2   | 0.893554517    | 666.7    | 659.325  | 7.375   | 1.011185682               | 0.9383         | -1.006         |
| 100009_r_at                | 86      | 157.7   | 84.2    | 83.2    | 207.5   | 249.7   | 290.3   | 144.2   | 0.022015042    | 102.775  | 222.925  | 120.15  | 0.461029494               | 0.01139        | 2.186          |
| 100010_at                  | 101.6   | 191.7   | 119.7   | 138.2   | 128.1   | 155.9   | 96.8    | 178.8   | 0.939010603    | 137.8    | 139.9    | 2.1     | 0.984989278               | 0.9299         | -1.018         |
| 100011_at                  | 186.1   | 266.6   | 216.1   | 258.7   | 177.5   | 282.8   | 199.9   | 299.5   | 0.829703094    | 231.875  | 239.925  | 8.05    | 0.966447848               | 0.9001         | -1.02          |
| 100012_at                  | 41.5    | 176.9   | 51.7    | 91.2    | 55      | 55.8    | 97.8    | 203     | 0.79596111     | 90.325   | 102.9    | 12.575  | 0.877793975               | 0.7625         | 1.152          |
| 100013_at                  | 236.3   | 250.3   | 277.3   | 237.5   | 295.2   | 278.2   | 262.9   | 286.2   | 0.045609509    | 250.35   | 280.625  | 30.275  | 0.892115813               | 0.04125        | 1.122          |
| 100014_at                  | 307.9   | 258.3   | 262.8   | 253.9   | 169.1   | 226.6   | 205.7   | 264.9   | 0.069971645    | 270.725  | 216.575  | 54.15   | 1.250028858               | 0.06581        | -1.263         |
| 100015_at                  | 410.8   | 364.1   | 308.7   | 370.8   | 267.1   | 314.7   | 358.8   | 316.5   | 0.13089508     | 363.6    | 314.275  | 49.325  | 1.156948532               | 0.1352         | -1.157         |
| 100016_at                  | 813.6   | 1306.6  | 980.8   | 989.1   | 1263.5  | 1094.7  | 1204.3  | 1102.5  | 0.265545185    | 1022.525 | 1166.25  | 143.725 | 0.87676313                | 0.2134         | 1.155          |
| 100017_at                  | 66.8    | 66.6    | 100.9   | 86.2    | 75.8    | 71      | 93.1    | 57.2    | 0.618417287    | 80.125   | 74.275   | 5.85    | 1.07876136                | 0.6177         | -1.078         |
| 100018_at                  | 127.9   | 122.3   | 151.5   | 143.7   | 186     | 126.2   | 155.5   | 131     | 0.428606226    | 136.35   | 149.675  | 13.325  | 0.910973777               | 0.4364         | -1.089         |
| 100019_at                  | 1345.7  | 984.8   | 1046    | 1098.6  | 1117.8  | 1047.7  | 1167.7  | 1151.9  | 0.977670439    | 1118.775 | 1121.275 | 2.5     | 0.997770395               | 0.9104         | -1.008         |
| 100020_at                  | 715.8   | 948     | 739.7   | 900.1   | 641.1   | 702     | 846     | 746.6   | 0.252613518    | 825.9    | 733.925  | 91.975  | 1.125319345               | 0.2503         | -1.123         |
| 100021_at                  | 13      | 7.1     | 25.7    | 34.5    | 39.5    | 9.8     | 12.2    | 14.6    | 0.913447442    | 20.075   | 19.025   | 1.05    | 1.055190539               | 0.9304         | -1.044         |
| 100022_at                  | 174.3   | 263.8   | 226.4   | 265.3   | 185.4   | 229.9   | 238.4   | 159.2   | 0.343935404    | 232.45   | 203.225  | 29.225  | 1.143806126               | 0.3656         | -1.143         |
| 100023_at                  | 157.5   | 274.7   | 188.4   | 202.1   | 129.9   | 181.7   | 162     | 153.8   | 0.143884118    | 205.675  | 156.85   | 48.825  | 1.311284667               | 0.1056         | -1.294         |
| 100024_at                  | 193.4   | 405.5   | 218.1   | 248.7   | 305.7   | 431.3   | 374     | 389.5   | 0.106457627    | 266.425  | 375.125  | 108.7   | 0.710229923               | 0.07834        | 1.458          |
| 100026_at                  | 172.3   | 170.5   | 229.3   | 133.5   | 121     | 244.5   | 285.9   | 173.8   | 0.507563482    | 176.4    | 206.3    | 29.9    | 0.855065439               | 0.5983         | 1.131          |
| 100027_s_at                | 694.3   | 893.5   | 856     | 731.4   | 846.1   | 848.5   | 971.6   | 844     | 0.201874532    | 793.8    | 877.55   | 83.75   | 0.904563843               | 0.1873         | 1.11           |
| 100028_r_at                | 106.1   | 142.4   | 105.4   | 130.5   | 114.1   | 151.2   | 144.6   | 84.5    | 0.894343399    | 121.1    | 123.6    | 2.5     | 0.979773463               | 0.9828         | -1.003         |
| 100029_at                  | 905.2   | 1086.2  | 1089.8  | 965.4   | 1079.8  | 1099.7  | 1153.7  | 916.5   | 0.487394669    | 1011.65  | 1062.425 | 50.775  | 0.952208391               | 0.502          | -1.05          |
| 100030_at                  | 16.8    | 16.4    | 13      | 15.1    | 29.1    | 15.6    | 19.9    | 20.9    | 0.118201044    | 15.325   | 21.375   | 6.05    | 0.716959064               | 0.06768        | 1.367          |
| 100032_at                  | 566.8   | 513.6   | 436.1   | 958.6   | 537.7   | 647.3   | 549.8   | 1168    | 0.594113137    | 618.775  | 725.7    | 106.925 | 0.852659501               | 0.5637         | 1.164          |
| 100033_at                  | 712.9   | 970.6   | 847.1   | 906.7   | 690.9   | 909.5   | 922.5   | 830.6   | 0.793294178    | 859.325  | 838.375  | 20.95   | 1.024988818               | 0.8011         | -1.025         |
| 100034_at                  | 1.1     | 1.9     | 2.9     | 1.7     | 3.4     | 1.9     | 6.8     | 4.7     | 0.109887912    | 1.9      | 4.2      | 2.3     | 0.452380952               | 0.06875        | 2.097          |
| 100035_at                  | 23.5    | 15.4    | 20      | 18.5    | 23.8    | 6.5     | 4.3     | 21.5    | 0.376372017    | 19.35    | 14.025   | 5.325   | 1.379679144               | 0.2474         | -1.747         |
| 100037_at                  | 600.1   | 471.9   | 655.2   | 628.6   | 468.2   | 489     | 452.9   | 485.9   | 0.063301115    | 588.95   | 474      | 114.95  | 1.242510549               | 0.03223        | -1.234         |
| 100039_at                  | 2147.8  | 2346.5  | 2598.2  | 2247.8  | 3009.5  | 2393    | 1995    | 2316.8  | 0.707773111    | 2335.075 | 2428.575 | 93.5    | 0.961500057               | 0.7553         | -1.031         |
| 100040_at                  | 490.2   | 623.5   | 459.6   | 397.6   | 908.2   | 437.5   | 532.7   | 513.4   | 0.412542363    | 492.725  | 597.95   | 105.225 | 0.824023748               | 0.4014         | 1.181          |
| 100041_at                  | 1535.2  | 1899.8  | 1676.5  | 1697.2  | 1782.8  | 1913.6  | 2057.3  | 1804.5  | 0.105590799    | 1702.175 | 1889.55  | 187.375 | 0.900836178               | 0.1014         | -1.111         |
| 100042_at                  | 467.3   | 380.4   | 422.9   | 483.5   | 297.6   | 379.7   | 374.1   | 425.3   | 0.0972528      | 438.525  | 369.175  | 69.35   | 1.18785129                | 0.1053         | -1.192         |
| 100043_f_at                | 146.7   | 91.8    | 149.4   | 132.7   | 124.2   | 111.2   | 53.8    | 139.8   | 0.361613258    | 130.15   | 107.25   | 22.9    | 1.213519814               | 0.3685         | -1.266         |
| 100044_at                  | 394.2   | 349.9   | 365.7   | 448.1   | 182.7   | 316.5   | 228.9   | 208.5   | 0.006153776    | 389.475  | 234.15   | 155.325 | 1.663356823               | 0.006526       | -1.692         |
| 100046_at                  | 1622.7  | 1452.8  | 1859.5  | 1526.3  | 1460.7  | 1427.7  | 1382.7  | 1464.3  | 0.130971147    | 1615.325 | 1433.85  | 181.475 | 1.126564843               | 0.08131        | -1.122         |
| 100047_at                  | 7.5     | 4.8     | 12.7    | 5.6     | 7.5     | 5.1     | 7.3     | 8       | 0.739871731    | 7.65     | 6.975    | 0.675   | 1.096774194               | 0.8928         | -1.034         |
| 100048_at                  | 268.9   | 216.9   | 234.9   | 197.4   | 133.4   | 259.5   | 180.8   | 216.5   | 0.348716238    | 229.525  | 197.55   | 31.975  | 1.161857758               | 0.3112         | -1.189         |
| 100049_at                  | 0.9     | 5.3     | 3       | 2.5     | 4.3     | 1.3     | 3.9     | 1.4     | 0.874253953    | 2.925    | 2.725    | 0.2     | 1.073394495               | 0.9392         | -1.039         |
| 100050_at                  | 1233.3  | 1130    | 1058.3  | 863.2   | 1322.7  | 1710.2  | 1512.7  | 1116.5  | 0.069448209    | 1071.2   | 1415.525 | 344.325 | 0.756751029               | 0.06023        | 1.316          |
| 100051_at                  | 1161.4  | 1175.8  | 1286.2  | 1162.6  | 1389.5  | 1461.6  | 1373.8  | 1092.5  | 0.203410571    | 1196.5   | 1329.35  | 132.85  | 0.900063941               | 0.1985         | 1.105          |
| 100052_at                  | 10.4    | 5.9     | 7.2     | 10.4    | 29.9    | 6.9     | 6.1     | 9.4     | 0.479299987    | 8.475    | 13.075   | 4.6     | 0.648183556               | 0.5734         | 1.26           |
| 100054_s_at                | 322.8   | 462     | 475.5   | 434.2   | 550.9   | 345.1   | 432.6   | 333.4   | 0.899047518    | 423.625  | 415.5    | 8.125   | 1.019554753               | 0.8494         | -1.029         |
| 100056_at                  | 902.5   | 865     | 915.4   | 906.4   | 746.5   | 988     | 795.1   | 887.5   | 0.482693468    | 897.325  | 854.275  | 43.05   | 1.050393609               | 0.4191         | -1.056         |
| 100057_at                  | 1457.4  | 1197.9  | 1233.5  | 1306.6  | 1292.8  | 1051.9  | 1226.6  | 1128.7  | 0.164923387    | 1298.85  | 1175     | 123.85  | 1.105404255               | 0.1605         | -1.106         |
| 100058_at                  | 222.8   | 345.3   | 299.5   | 318.2   | 354.9   | 325.1   | 291.6   | 313.5   | 0.44188987     | 296.45   | 321.275  | 24.825  | 0.922729749               | 0.4149         | -1.095         |
| 100059_at                  | 890.4   | 1627.4  | 1114.7  | 1137.9  | 1498    | 1368.8  | 1344.2  | 1289.4  | 0.330157367    | 1192.6   | 1375.1   | 182.5   | 0.867282379               | 0.2474         | 1.179          |
| 100060_i_at                | 0.8     | 1       | 2.1     | 2.6     | 1.1     | 2.6     | 1.3     | 1       | 0.834028676    | 1.625    | 1.5      | 0.125   | 1.083333333               | 0.9623         | -1.018         |



|             |         |         |         |         |        |         |         |         |             |           |          |         |             |          |        |
|-------------|---------|---------|---------|---------|--------|---------|---------|---------|-------------|-----------|----------|---------|-------------|----------|--------|
| 100061_f_at | 16.7    | 17.3    | 32.3    | 56.3    | 90.9   | 64.2    | 76.6    | 101.2   | 0.005497795 | 30.65     | 83.225   | 52.575  | 0.368278762 | 0.01078  | 3.047  |
| 100062_at   | 1318.1  | 986.5   | 1050.4  | 920.8   | 737.8  | 870.8   | 825.6   | 666.9   | 0.034657094 | 1068.95   | 775.275  | 293.675 | 1.378801071 | 0.01771  | -1.373 |
| 100064_f_at | 10040.3 | 10151.4 | 9780.9  | 10401.5 | 7063.2 | 5738    | 7119    | 6774.3  | 0.000631163 | 10093.525 | 6673.625 | 3419.9  | 1.51245013  | 0.000198 | -1.518 |
| 100065_r_at | 1903.8  | 1402.6  | 1899    | 2076.9  | 917.9  | 1044.5  | 1097.1  | 1092.7  | 0.009520023 | 1820.575  | 1038.05  | 782.525 | 1.753841337 | 0.001156 | -1.74  |
| 100066_at   | 1318.7  | 1136    | 1094.9  | 1080.6  | 1119.8 | 1073.2  | 1130.2  | 1103.1  | 0.426875467 | 1157.55   | 1106.575 | 50.975  | 1.046065563 | 0.4067   | -1.043 |
| 100067_at   | 13.8    | 10.4    | 34.2    | 11.8    | 23.4   | 17.4    | 9.8     | 13.8    | 0.827927089 | 17.55     | 16.1     | 1.45    | 1.090062112 | 0.9696   | -1.013 |
| 100068_at   | 14863.1 | 14730.1 | 15356.5 | 15176.3 | 24703  | 15989.3 | 21558.4 | 16355.1 | 0.116048695 | 15031.5   | 19651.45 | 4619.95 | 0.764905389 | 0.05713  | 1.285  |
| 100069_at   | 54.8    | 61.9    | 66.3    | 87.8    | 114.9  | 89.3    | 75.5    | 80.2    | 0.098329702 | 67.7      | 89.975   | 22.275  | 0.752431231 | 0.08014  | 1.332  |
| 100071_at   | 51.2    | 16.2    | 75.4    | 80.8    | 71     | 27.9    | 68      | 48.5    | 0.912481503 | 55.9      | 53.85    | 2.05    | 1.038068709 | 0.887    | -1.066 |
| 100072_at   | 726.2   | 1174.8  | 618.3   | 891.5   | 931.4  | 904     | 833.8   | 1087.9  | 0.54812084  | 852.7     | 939.275  | 86.575  | 0.907827846 | 0.448    | -1.129 |
| 100073_at   | 629.1   | 500.6   | 456.5   | 399.7   | 685.1  | 427.1   | 397.4   | 488.3   | 0.971758706 | 496.475   | 499.475  | 3       | 0.993993693 | 0.985    | -1.003 |
| 100074_at   | 2137.7  | 2325.1  | 2027.6  | 1573.6  | 1473.8 | 2179.1  | 1119    | 958.3   | 0.12461577  | 2016      | 1432.55  | 583.45  | 1.407280723 | 0.1031   | -1.465 |
| 100078_at   | 26.6    | 28.1    | 32.9    | 35.2    | 37     | 31.5    | 40.2    | 23.7    | 0.588359946 | 30.7      | 33.1     | 2.4     | 0.927492447 | 0.6585   | -1.064 |
| 100079_at   | 2940.1  | 2665.8  | 2677.5  | 2822.3  | 3208.9 | 2414.9  | 2575.4  | 2822    | 0.914674988 | 2776.425  | 2755.3   | 21.125  | 1.007667042 | 0.8545   | -1.013 |
| 100080_at   | 57.5    | 37.1    | 20.2    | 40.6    | 13.3   | 44.9    | 11.9    | 48.2    | 0.486147365 | 38.85     | 29.575   | 9.275   | 1.313609467 | 0.3862   | -1.503 |
| 100081_at   | 684.8   | 892     | 760.6   | 661     | 624    | 740.9   | 580.6   | 901.2   | 0.684771073 | 749.6     | 711.675  | 37.925  | 1.053289774 | 0.6334   | -1.062 |
| 100082_at   | 175.6   | 185.6   | 176.3   | 210.8   | 221.3  | 192.1   | 195.2   | 196.6   | 0.231246232 | 187.075   | 201.3    | 14.225  | 0.929334327 | 0.2136   | -1.077 |
| 100084_at   | 531.1   | 578.3   | 432.3   | 477.6   | 505.3  | 556.6   | 552.1   | 580.5   | 0.27833774  | 504.825   | 548.625  | 43.8    | 0.920164046 | 0.2539   | -1.092 |
| 100085_at   | 23      | 62.3    | 27      | 33.2    | 17.2   | 12.5    | 15.6    | 10      | 0.082904413 | 36.375    | 13.825   | 22.55   | 2.631103074 | 0.01055  | -2.493 |
| 100086_at   | 679.7   | 739.9   | 608.6   | 682.8   | 892.5  | 722.6   | 756.3   | 538.1   | 0.559952686 | 677.75    | 727.375  | 49.625  | 0.931775219 | 0.6318   | -1.059 |
| 100088_at   | 1643.8  | 1705    | 1714.8  | 2051.7  | 2154.1 | 1947.1  | 2223.3  | 1808.5  | 0.10343072  | 1778.825  | 2033.25  | 254.425 | 0.874867822 | 0.09854  | 1.144  |
| 100089_at   | 2096.4  | 2146    | 1955.6  | 2033.5  | 1836.8 | 2609.1  | 2370.7  | 2271.1  | 0.279667455 | 2057.875  | 2271.925 | 214.05  | 0.905784742 | 0.2784   | -1.096 |
| 100091_at   | 2629.8  | 2190.5  | 2683.4  | 1886.2  | 1925.3 | 2237.6  | 1944.7  | 2083.6  | 0.215822661 | 2347.475  | 2047.8   | 299.675 | 1.146339975 | 0.2048   | -1.137 |
| 100093_at   | 791.1   | 1243    | 867.1   | 1024.1  | 1004.1 | 1203.4  | 1010.2  | 1011.1  | 0.529184279 | 981.325   | 1057.2   | 75.875  | 0.928230231 | 0.4569   | -1.09  |
| 100094_at   | 1325.9  | 1640.8  | 1299.3  | 1342.7  | 1596.9 | 1521.3  | 1453.2  | 1582.7  | 0.190465373 | 1402.175  | 1538.525 | 136.35  | 0.911376156 | 0.1492   | -1.101 |
| 100095_at   | 1311.5  | 2651    | 1854.9  | 1754.7  | 1746.4 | 2504    | 2272.3  | 2745.3  | 0.27561022  | 1893.025  | 2317     | 423.975 | 0.817015537 | 0.2539   | 1.246  |
| 100099_at   | 1219.5  | 1209.9  | 1290.6  | 1096.3  | 1000.7 | 1232.5  | 1064.8  | 1568.4  | 0.930111195 | 1204.075  | 1216.6   | 12.525  | 0.989704915 | 0.9755   | -1.003 |
| 100100_at   | 67.8    | 60.4    | 39.7    | 57.8    | 62.8   | 57.4    | 50.5    | 67.5    | 0.673817678 | 56.425    | 59.55    | 3.125   | 0.94752309  | 0.6278   | -1.07  |
| 100101_at   | 1782.1  | 1752    | 1793.4  | 1720.9  | 1857.9 | 1700    | 1762.5  | 1520.1  | 0.523431267 | 1762.1    | 1710.125 | 51.975  | 1.030392515 | 0.4826   | -1.033 |
| 100103_f_at | 364.3   | 332.7   | 406.5   | 402.9   | 435.6  | 377.5   | 412.6   | 406.6   | 0.193993411 | 376.6     | 408.075  | 31.475  | 0.922869571 | 0.1903   | -1.086 |
| 100104_r_at | 23.1    | 19.3    | 29.2    | 24      | 20.1   | 35.3    | 27.7    | 25.9    | 0.410286873 | 23.9      | 27.25    | 3.35    | 0.87706422  | 0.4243   | 1.13   |
| 100106_at   | 48.1    | 65.1    | 48.4    | 92.3    | 40.4   | 42.2    | 39.2    | 106.8   | 0.759324957 | 63.475    | 57.15    | 6.325   | 1.110673666 | 0.5786   | -1.184 |
| 100109_s_at | 34.2    | 35.3    | 11.4    | 44.4    | 6.7    | 39.1    | 52.8    | 37.2    | 0.83474187  | 31.325    | 33.95    | 2.625   | 0.922680412 | 0.9412   | -1.044 |
| 100112_at   | 312     | 594.9   | 386.7   | 439     | 460.1  | 506.9   | 396.8   | 770     | 0.364802716 | 433.15    | 533.45   | 100.3   | 0.81197863  | 0.3381   | 1.226  |
| 100113_s_at | 551.2   | 405     | 470.8   | 494.4   | 317.5  | 479.1   | 423     | 384.7   | 0.132506988 | 480.35    | 401.075  | 79.275  | 1.197656299 | 0.1363   | -1.204 |
| 100115_at   | 508.3   | 1001.9  | 834.1   | 880.1   | 762.3  | 869.6   | 573.1   | 888     | 0.806773616 | 806.1     | 773.25   | 32.85   | 1.042483026 | 0.8909   | -1.026 |
| 100116_at   | 1390.7  | 1393    | 1411.4  | 1174.7  | 1935   | 983.2   | 1126.1  | 1131.9  | 0.840944606 | 1342.45   | 1294.05  | 48.4    | 1.037401955 | 0.6681   | -1.073 |
| 100117_at   | 28.8    | 10.5    | 13.1    | 22.2    | 24.6   | 11.5    | 9.4     | 14      | 0.511665119 | 18.65     | 14.875   | 3.775   | 1.253781513 | 0.5124   | -1.242 |
| 100120_at   | 334.9   | 292.4   | 277.9   | 385.8   | 299.9  | 378.6   | 419.4   | 332.6   | 0.36621096  | 322.75    | 357.625  | 34.875  | 0.90248165  | 0.361    | -1.108 |
| 100122_at   | 286.4   | 290.7   | 292.3   | 317.9   | 319.2  | 339.2   | 364     | 252.7   | 0.433893252 | 296.825   | 318.775  | 21.95   | 0.931142655 | 0.473    | -1.065 |
| 100123_f_at | 7878.5  | 7177.4  | 7668.3  | 8636.5  | 7944   | 7343.1  | 7555.1  | 7845.6  | 0.638884824 | 7840.175  | 7671.95  | 168.225 | 1.021927281 | 0.6539   | -1.02  |
| 100124_r_at | 2149.4  | 1797.9  | 1940.3  | 2237.8  | 1609.5 | 2136    | 2069.7  | 1480.9  | 0.329148109 | 2031.35   | 1824.025 | 207.325 | 1.113663464 | 0.3045   | -1.123 |
| 100125_at   | 488.5   | 351.7   | 503.6   | 542.2   | 274.7  | 582.3   | 313.9   | 508.8   | 0.573325305 | 471.5     | 419.925  | 51.575  | 1.122819551 | 0.4886   | -1.164 |
| 100126_at   | 1107.3  | 1200.2  | 1367.3  | 1029.1  | 1747   | 1214.8  | 1274.1  | 1111.6  | 0.361383594 | 1175.975  | 1336.875 | 160.9   | 0.879644694 | 0.3448   | -1.126 |
| 100127_at   | 85.8    | 69.6    | 55.9    | 60.5    | 223.9  | 414.8   | 429.9   | 231.6   | 0.018905094 | 67.95     | 325.05   | 257.1   | 0.209044762 | 0.000272 | 4.625  |
| 100128_at   | 4588.1  | 3523.8  | 4123.1  | 3201.2  | 3141.4 | 2667.6  | 2473.9  | 2181.1  | 0.018973881 | 3859.05   | 2616     | 1243.05 | 1.475172018 | 0.01271  | -1.474 |
| 100130_at   | 138     | 377.8   | 212.2   | 216.8   | 269.7  | 225.1   | 310.4   | 197.7   | 0.808118276 | 236.2     | 250.725  | 14.525  | 0.942068003 | 0.648    | 1.116  |
| 100131_at   | 32.3    | 21      | 36.5    | 45.3    | 57.9   | 45.3    | 26.3    | 72.5    | 0.196029184 | 33.775    | 50.5     | 16.725  | 0.668811881 | 0.2169   | 1.453  |
| 100133_at   | 1072.5  | 1441.8  | 1126.6  | 1220.3  | 1256.6 | 1558.5  | 1582.4  | 1279.6  | 0.139149629 | 1215.3    | 1419.275 | 203.975 | 0.856282257 | 0.1329   | 1.169  |
| 100134_at   | 902.6   | 2002.6  | 1069.6  | 1317.9  | 2335.5 | 1348.6  | 1894.3  | 1559.4  | 0.20495595  | 1323.175  | 1784.45  | 461.275 | 0.741502984 | 0.1728   | 1.382  |
| 100136_at   | 501.1   | 413.9   | 390.6   | 388.9   | 430.6  | 478.6   | 380.1   | 560.1   | 0.440978279 | 423.625   | 462.35   | 38.725  | 0.916243106 | 0.4459   | -1.086 |
| 100138_f_at | 461.2   | 703.1   | 346.8   | 355.9   | 448.9  | 378.1   | 504.4   | 418.4   | 0.755236977 | 466.75    | 437.45   | 29.3    | 1.066979083 | 0.8788   | -1.028 |
| 100139_at   | 13.6    | 12.7    | 17.5    | 20.2    | 24.6   | 29.7    | 15.4    | 24.1    | 0.084352955 | 16        | 23.45    | 7.45    | 0.682302772 | 0.07961  | 1.453  |
| 100141_at   | 63.7    | 58.9    | 45.1    | 75.8    | 53.3   | 63.7    | 44.5    | 67.3    | 0.66988285  | 60.875    | 57.2     | 3.675   | 1.064248252 | 0.6976   | -1.06  |
| 100142_at   | 741.1   | 895.1   | 841.8   | 988.5   | 626.1  | 855.9   | 802.7   | 955     | 0.536660713 | 866.625   | 809.925  | 56.7    | 1.070006482 | 0.5188   | -1.077 |
| 100143_at   | 31.7    | 21.2    | 17.4    | 8.7     | 13.2   | 13.2    | 19.3    | 15.2    | 0.420894896 | 19.75     | 15.225   | 4.525   | 1.297208539 | 0.569    | -1.187 |



|             |         |         |         |         |         |        |         |        |             |           |          |          |             |          |        |
|-------------|---------|---------|---------|---------|---------|--------|---------|--------|-------------|-----------|----------|----------|-------------|----------|--------|
| 100144_at   | 7100.8  | 6066.5  | 7238.9  | 7331.2  | 4794.1  | 6639.4 | 5718.6  | 7639.5 | 0.333874702 | 6934.35   | 6197.9   | 736.45   | 1.118822504 | 0.2989   | -1.132 |
| 100147_at   | 85.9    | 107.4   | 55.8    | 95.1    | 34.7    | 96.7   | 111.7   | 106.5  | 0.951143889 | 86.05     | 87.4     | 1.35     | 0.984553776 | 0.8765   | -1.052 |
| 100148_at   | 764.4   | 871.9   | 684.7   | 766.1   | 591.8   | 751.2  | 604.9   | 752.7  | 0.151986863 | 771.775   | 675.15   | 96.625   | 1.143116345 | 0.1491   | -1.146 |
| 100149_at   | 13.4    | 31.2    | 17.3    | 6.3     | 10.5    | 8.1    | 9.3     | 32.3   | 0.806111234 | 17.05     | 15.05    | 2        | 1.132890365 | 0.7653   | -1.155 |
| 100150_f_at | 50.7    | 27      | 62.6    | 63.1    | 39.6    | 33.1   | 60.8    | 29.5   | 0.394092231 | 50.85     | 40.75    | 10.1     | 1.247852761 | 0.4469   | -1.231 |
| 100151_at   | 7731.7  | 6700.8  | 6957.6  | 7331.8  | 7790.1  | 6617   | 8103.8  | 7507.1 | 0.442498959 | 7180.475  | 7504.5   | 324.025  | 0.956822573 | 0.4573   | -1.044 |
| 100152_at   | 7       | 6.9     | 21      | 7.1     | 47.9    | 12.5   | 18.4    | 9.3    | 0.292933798 | 10.5      | 22.025   | 11.525   | 0.476730988 | 0.1906   | 1.942  |
| 100153_at   | 634.5   | 690.9   | 626.1   | 435.2   | 771.4   | 916.6  | 724.9   | 1089.1 | 0.035308563 | 596.675   | 875.5    | 278.825  | 0.681524843 | 0.03109  | 1.47   |
| 100154_at   | 681.5   | 1061.7  | 841.4   | 974.3   | 971.6   | 958.4  | 967.6   | 832.1  | 0.658134254 | 889.725   | 932.425  | 42.7     | 0.954205432 | 0.5936   | -1.06  |
| 100155_at   | 511     | 1035.9  | 837.7   | 961.8   | 1132.8  | 839.1  | 1208.2  | 993    | 0.200429261 | 836.6     | 1043.275 | 206.675  | 0.80189787  | 0.217    | 1.279  |
| 100156_at   | 2629.8  | 2060    | 2451.3  | 2029    | 2004.7  | 2075.6 | 2157.4  | 2331   | 0.40716527  | 2292.525  | 2142.175 | 150.35   | 1.070185676 | 0.4131   | -1.065 |
| 100213_f_at | 22914.7 | 25403.3 | 26408.5 | 21224.4 | 48616.6 | 20237  | 30259.2 | 23202  | 0.379457047 | 23987.725 | 30578.7  | 6590.975 | 0.784458626 | 0.3834   | 1.206  |
| 100225_f_at | 782.6   | 546.1   | 639.9   | 683.5   | 762     | 558    | 670.2   | 593    | 0.805135565 | 663.025   | 645.8    | 17.225   | 1.026672344 | 0.8129   | -1.025 |
| 100272_at   | 49.3    | 35.6    | 49.7    | 55.1    | 40.9    | 78.2   | 29.4    | 53.7   | 0.795436468 | 47.425    | 50.55    | 3.125    | 0.93818002  | 0.9565   | -1.013 |
| 100277_at   | 1678.8  | 1583.8  | 1358.6  | 1860.8  | 1589    | 1682.7 | 1620.5  | 2314.9 | 0.40972963  | 1620.5    | 1801.775 | 181.275  | 0.899390878 | 0.399    | 1.105  |
| 100278_at   | 50.2    | 47.8    | 17.2    | 17.8    | 83.5    | 62.2   | 11.4    | 16.8   | 0.629305868 | 33.25     | 43.475   | 10.225   | 0.764807361 | 0.8985   | -1.079 |
| 100279_at   | 98.2    | 239.7   | 182     | 77.8    | 41.2    | 85.9   | 146.2   | 35.8   | 0.170284136 | 149.425   | 77.275   | 72.15    | 1.933678421 | 0.1365   | -2.061 |
| 100280_at   | 27.9    | 43.2    | 56.9    | 39      | 50.8    | 23.9   | 44      | 43     | 0.878734566 | 41.75     | 40.425   | 1.325    | 1.032776747 | 0.868    | -1.039 |
| 100281_at   | 9.4     | 56.8    | 32.2    | 9.2     | 68.5    | 9.3    | 13.2    | 9.1    | 0.922436531 | 26.9      | 25.025   | 1.875    | 1.074925075 | 0.793    | -1.199 |
| 100282_at   | 131.8   | 172.5   | 184.1   | 165.9   | 183.5   | 175.4  | 158     | 160.3  | 0.674631884 | 163.575   | 169.3    | 5.725    | 0.966184288 | 0.6384   | -1.041 |
| 100283_at   | 20.2    | 14.9    | 21.7    | 19.9    | 32.2    | 20.3   | 21.9    | 12     | 0.612865559 | 19.175    | 21.6     | 2.425    | 0.887731481 | 0.7552   | -1.074 |
| 100284_at   | 7.7     | 9.2     | 3.7     | 8.3     | 7.7     | 4.6    | 11.4    | 7.8    | 0.73700797  | 7.225     | 7.875    | 0.65     | 0.917460317 | 0.7468   | -1.098 |
| 100285_at   | 5.1     | 4       | 16.2    | 4.5     | 3.7     | 6      | 5.7     | 3.5    | 0.424756221 | 7.45      | 4.725    | 2.725    | 1.576719577 | 0.4255   | -1.351 |
| 100286_at   | 14.6    | 11.9    | 14.5    | 10.3    | 18.6    | 15.6   | 19.2    | 11.2   | 0.178119623 | 12.825    | 16.15    | 3.325    | 0.794117647 | 0.1943   | 1.245  |
| 100287_at   | 63.5    | 42.2    | 53.2    | 30.7    | 51.6    | 33.8   | 13.5    | 62.9   | 0.612494278 | 47.4      | 40.45    | 6.95     | 1.171817058 | 0.4993   | -1.311 |
| 100289_at   | 688.2   | 696.9   | 762.2   | 836.4   | 692.7   | 746.3  | 630.4   | 814.4  | 0.648852971 | 745.925   | 720.95   | 24.975   | 1.034641792 | 0.6354   | -1.036 |
| 100290_f_at | 248.3   | 195.5   | 218.3   | 189.6   | 155.9   | 184.5  | 175.6   | 152.1  | 0.032255591 | 212.925   | 167.025  | 45.9     | 1.27480916  | 0.02034  | -1.272 |
| 100291_at   | 171.8   | 149.1   | 176.5   | 127.1   | 124.7   | 135.4  | 89.6    | 57.7   | 0.048165264 | 156.125   | 101.85   | 54.275   | 1.532891507 | 0.06383  | -1.602 |
| 100292_at   | 43      | 45.2    | 58.7    | 35.9    | 61.8    | 44.4   | 45.6    | 62.8   | 0.293857071 | 45.7      | 53.65    | 7.95     | 0.851817335 | 0.2823   | 1.178  |
| 100293_at   | 243.6   | 195.6   | 220.7   | 308.2   | 184.7   | 214.9  | 193.7   | 270.4  | 0.431690846 | 242.025   | 215.925  | 26.1     | 1.120875304 | 0.4205   | -1.117 |
| 100294_at   | 83.7    | 55.5    | 45.7    | 76.1    | 83.4    | 66.4   | 58      | 87.8   | 0.473807999 | 65.25     | 73.9     | 8.65     | 0.882949932 | 0.4469   | 1.149  |
| 100295_at   | 185.9   | 117.5   | 168.4   | 196.6   | 195.4   | 193.3  | 195.4   | 218    | 0.151305958 | 167.1     | 200.525  | 33.425   | 0.833312555 | 0.1443   | 1.221  |
| 100296_at   | 153.6   | 164.3   | 162.2   | 189.3   | 70.2    | 161.1  | 101.7   | 228.6  | 0.501315165 | 167.35    | 140.4    | 26.95    | 1.191951567 | 0.3428   | -1.31  |
| 100297_at   | 162.6   | 231     | 234.2   | 335     | 194.8   | 354.6  | 237.3   | 438.3  | 0.36452916  | 240.7     | 306.25   | 65.55    | 0.785959184 | 0.3824   | 1.25   |
| 100298_at   | 218.4   | 183.3   | 258.1   | 244.6   | 147     | 82.9   | 192.8   | 287.7  | 0.354228761 | 226.1     | 177.6    | 48.5     | 1.273085586 | 0.2708   | -1.391 |
| 100299_f_at | 18.6    | 8.6     | 8.9     | 13.4    | 13.3    | 5.8    | 8       | 8.6    | 0.274482404 | 12.375    | 8.925    | 3.45     | 1.386554622 | 0.2488   | -1.378 |
| 100300_at   | 66      | 56.8    | 63.9    | 43.6    | 50.8    | 66.7   | 59.3    | 96.6   | 0.384221107 | 57.575    | 68.35    | 10.775   | 0.842355523 | 0.3879   | 1.167  |
| 100301_at   | 11.4    | 21.7    | 13.9    | 18.8    | 15.5    | 19.8   | 13.6    | 9.4    | 0.576508684 | 16.45     | 14.575   | 1.875    | 1.12864494  | 0.5815   | -1.132 |
| 100302_at   | 13.4    | 83.7    | 53.5    | 45.1    | 102.9   | 75.4   | 64.1    | 53.4   | 0.216848586 | 48.925    | 73.95    | 25.025   | 0.661595673 | 0.2185   | 1.77   |
| 100303_at   | 48      | 15.4    | 25.5    | 27.5    | 13.1    | 26.7   | 11.8    | 35.9   | 0.450645308 | 29.1      | 21.875   | 7.225    | 1.330285714 | 0.414    | -1.369 |
| 100304_at   | 214     | 197.6   | 240.9   | 199.1   | 334.4   | 234.1  | 210.3   | 217.9  | 0.305188937 | 212.9     | 249.175  | 36.275   | 0.854419585 | 0.2654   | 1.153  |
| 100305_g_at | 79      | 61.6    | 408.1   | 249.5   | 279.5   | 159.4  | 236.2   | 42.5   | 0.842821554 | 199.55    | 179.4    | 20.15    | 1.112318841 | 0.9678   | -1.026 |
| 100306_at   | 194.4   | 146.5   | 201.8   | 218.1   | 196.1   | 194    | 163.9   | 175    | 0.666147016 | 190.2     | 182.25   | 7.95     | 1.043621399 | 0.7329   | -1.035 |
| 100307_at   | 73.1    | 114.2   | 163.5   | 145.9   | 161.6   | 191.1  | 115.5   | 126.1  | 0.39007706  | 124.175   | 148.575  | 24.4     | 0.835773179 | 0.3739   | 1.226  |
| 100308_at   | 92.6    | 108.2   | 56      | 108.2   | 127     | 112.2  | 123.7   | 112.6  | 0.106984302 | 91.25     | 118.875  | 27.625   | 0.767613039 | 0.1119   | 1.345  |
| 100309_at   | 21.7    | 28.1    | 8.2     | 9.6     | 27.5    | 39.3   | 9.1     | 7.4    | 0.682147929 | 16.9      | 20.825   | 3.925    | 0.81152461  | 0.8432   | 1.111  |
| 100311_f_at | 16.7    | 18.8    | 6       | 34      | 6.1     | 9.7    | 5.1     | 4.5    | 0.11637001  | 18.875    | 6.35     | 12.525   | 2.972440945 | 0.0501   | -2.64  |
| 100313_at   | 33      | 37.7    | 53.4    | 34.2    | 15      | 43.5   | 28.8    | 36.3   | 0.305630643 | 39.575    | 30.9     | 8.675    | 1.280744337 | 0.286    | -1.351 |
| 100314_f_at | 11.5    | 6.2     | 7.2     | 8.7     | 14.2    | 11.5   | 7.7     | 7.6    | 0.387831109 | 8.4       | 10.25    | 1.85     | 0.819512195 | 0.3833   | 1.209  |
| 100315_at   | 71.7    | 59.9    | 23.5    | 100.5   | 67      | 69.2   | 77      | 106.7  | 0.423606599 | 63.9      | 79.975   | 16.075   | 0.798999687 | 0.3536   | 1.392  |
| 100317_at   | 23.7    | 27.9    | 32.6    | 32.4    | 39.5    | 57.7   | 43.3    | 40     | 0.024855513 | 29.15     | 45.125   | 15.975   | 0.64598338  | 0.009734 | 1.54   |
| 100318_at   | 147.5   | 98.1    | 200.1   | 125     | 213.3   | 122.9  | 225.7   | 134.8  | 0.393062408 | 142.675   | 174.175  | 31.5     | 0.819147409 | 0.3955   | 1.218  |
| 100319_at   | 22.3    | 17.1    | 14.4    | 23.6    | 37.4    | 6.3    | 21      | 31.1   | 0.557110975 | 19.35     | 23.95    | 4.6      | 0.807933194 | 0.9233   | -1.043 |
| 100320_at   | 96.6    | 65.9    | 100     | 72.2    | 53.1    | 90.9   | 52.3    | 44.2   | 0.133998274 | 83.675    | 60.125   | 23.55    | 1.391683992 | 0.1092   | -1.424 |
| 100321_f_at | 50      | 46.4    | 60.9    | 64.7    | 58.1    | 53.4   | 55.8    | 59.1   | 0.821656763 | 55.5      | 56.6     | 1.1      | 0.980565371 | 0.7477   | -1.028 |
| 100322_at   | 10.5    | 24.4    | 35.7    | 22.7    | 59.2    | 49.9   | 61.7    | 69.1   | 0.001658108 | 23.325    | 59.975   | 36.65    | 0.388912047 | 0.008217 | 2.789  |



|             |         |         |         |         |         |         |         |         |             |           |           |          |             |            |        |
|-------------|---------|---------|---------|---------|---------|---------|---------|---------|-------------|-----------|-----------|----------|-------------|------------|--------|
| 100323_at   | 3116.5  | 2125.4  | 3086.8  | 3245.5  | 2482.1  | 3093.9  | 2683.2  | 3114.2  | 0.87451127  | 2893.55   | 2843.35   | 50.2     | 1.017655231 | 0.9433     | -1.008 |
| 100324_g_at | 696.5   | 424     | 492.1   | 715.8   | 377.4   | 695     | 456.2   | 566.6   | 0.583026063 | 582.1     | 523.8     | 58.3     | 1.111302024 | 0.5841     | -1.113 |
| 100325_at   | 29.4    | 38.7    | 34      | 37.3    | 26.5    | 46.5    | 32.9    | 47      | 0.572713356 | 34.85     | 38.225    | 3.375    | 0.911706998 | 0.6638     | -1.072 |
| 100326_f_at | 28.1    | 49.6    | 53.5    | 39.2    | 41.9    | 48.5    | 43      | 38.6    | 0.950709966 | 42.6      | 43        | 0.4      | 0.990697674 | 0.8227     | -1.036 |
| 100327_at   | 100.9   | 68.8    | 126     | 95.5    | 125.9   | 156.3   | 69.5    | 199.7   | 0.248572262 | 97.8      | 137.85    | 40.05    | 0.709466812 | 0.2949     | 1.344  |
| 100328_s_at | 141.8   | 55.9    | 125.8   | 116.3   | 99.3    | 127.1   | 114.5   | 199.3   | 0.421456445 | 109.95    | 135.05    | 25.1     | 0.81414291  | 0.4135     | 1.255  |
| 100329_at   | 8.3     | 5.3     | 4.1     | 3       | 15.4    | 6.7     | 6.7     | 20.1    | 0.121629792 | 5.175     | 12.225    | 7.05     | 0.423312883 | 0.06345    | 2.242  |
| 100330_at   | 1.3     | 1.1     | 2.5     | 3.4     | 1.5     | 1.2     | 1.1     | 1.1     | 0.213044549 | 2.075     | 1.225     | 0.85     | 1.693877551 | 0.1866     | -1.538 |
| 100331_g_at | 9968.8  | 9821.8  | 11089.9 | 8745.1  | 13871.5 | 8723.8  | 11159.4 | 9126.9  | 0.557216866 | 9906.4    | 10720.4   | 814      | 0.924069997 | 0.5967     | -1.067 |
| 100332_s_at | 1549.4  | 1061.3  | 1206.6  | 1088.4  | 958.1   | 1279.5  | 951.6   | 1015.9  | 0.251833635 | 1226.425  | 1051.275  | 175.15   | 1.166607215 | 0.2248     | -1.162 |
| 100333_at   | 35      | 26.8    | 78.7    | 67.4    | 59.5    | 117.9   | 105     | 47.4    | 0.205090012 | 51.975    | 82.45     | 30.475   | 0.63038205  | 0.2006     | 1.628  |
| 100334_f_at | 8.8     | 13.5    | 46.9    | 25.9    | 7.8     | 12.6    | 6.3     | 12.8    | 0.200838085 | 23.775    | 9.875     | 13.9     | 2.407594937 | 0.1263     | -2.062 |
| 100335_at   | 53      | 27      | 122.1   | 47.5    | 73.2    | 36.8    | 66.3    | 29.2    | 0.658399503 | 62.4      | 51.375    | 11.025   | 1.21459854  | 0.7711     | -1.124 |
| 100336_s_at | 133.3   | 118.5   | 159.7   | 163.1   | 165.8   | 126.4   | 180     | 148     | 0.497093299 | 143.65    | 155.05    | 11.4     | 0.926475331 | 0.506      | -1.079 |
| 100337_at   | 26.6    | 16      | 15.8    | 15.4    | 7.6     | 12.1    | 10.5    | 11.5    | 0.053391937 | 18.45     | 10.425    | 8.025    | 1.769784173 | 0.0157     | -1.745 |
| 100338_s_at | 13.3    | 8.6     | 19.5    | 17.5    | 27.6    | 18.1    | 26.8    | 20.6    | 0.043658102 | 14.725    | 23.275    | 8.55     | 0.632653061 | 0.0582     | 1.627  |
| 100339_at   | 34.3    | 8.1     | 13.4    | 19.1    | 15.1    | 45.7    | 18.4    | 36.2    | 0.316700435 | 18.725    | 28.85     | 10.125   | 0.649046794 | 0.2895     | 1.597  |
| 100340_at   | 0.7     | 2.9     | 2.1     | 1.9     | 1.6     | 5.5     | 1.6     | 2       | 0.498560407 | 1.9       | 2.675     | 0.775    | 0.710280374 | 0.4754     | 1.38   |
| 100341_g_at | 7.4     | 7.1     | 4.5     | 5.5     | 3.4     | 4.7     | 23.4    | 5.9     | 0.544870546 | 6.125     | 9.35      | 3.225    | 0.655080214 | 0.7646     | 1.148  |
| 100342_i_at | 11193.6 | 12879.6 | 12450.2 | 10564.6 | 21808.6 | 10869.4 | 13217.5 | 11599.8 | 0.382387551 | 11772     | 14373.825 | 2601.825 | 0.818988683 | 0.3604     | 1.177  |
| 100343_f_at | 14298.7 | 13821.4 | 16198.8 | 11810.8 | 18004   | 11371.7 | 14970   | 11385.7 | 0.958958951 | 14032.425 | 13932.85  | 99.575   | 1.007146779 | 0.8821     | -1.02  |
| 100344_at   | 593.5   | 545.8   | 719.2   | 675.7   | 583.3   | 596.9   | 730     | 776.9   | 0.561777199 | 633.55    | 671.775   | 38.225   | 0.943098508 | 0.5724     | -1.058 |
| 100345_f_at | 2644    | 2544.2  | 2599.9  | 2057.3  | 3865.8  | 2293.9  | 3051.2  | 2419.7  | 0.312985272 | 2461.35   | 2907.65   | 446.3    | 0.846508349 | 0.304      | 1.161  |
| 100346_at   | 47.2    | 37.1    | 34.7    | 28.1    | 43      | 19.5    | 23      | 42.9    | 0.557412564 | 36.775    | 32.1      | 4.675    | 1.145638629 | 0.4671     | -1.198 |
| 100347_at   | 15.8    | 11.9    | 16.8    | 22.4    | 19.7    | 10.3    | 15.6    | 27.9    | 0.717400767 | 16.725    | 18.375    | 1.65     | 0.910204082 | 0.8234     | -1.059 |
| 100348_at   | 16      | 46.1    | 46.6    | 7.2     | 62.4    | 39.8    | 29.7    | 43.8    | 0.275073874 | 28.975    | 43.925    | 14.95    | 0.659647126 | 0.2277     | 1.898  |
| 100349_at   | 11      | 28.9    | 48.9    | 10.8    | 71.5    | 11.5    | 28.3    | 10.4    | 0.757036714 | 24.9      | 30.425    | 5.525    | 0.818405916 | 0.8828     | -1.094 |
| 100350_at   | 5.4     | 7.3     | 9.8     | 6.5     | 8.2     | 6.7     | 9.6     | 7.3     | 0.560673998 | 7.25      | 7.95      | 0.7      | 0.911949686 | 0.494      | -1.112 |
| 100351_f_at | 7.4     | 2.8     | 6.2     | 9.6     | 11      | 23.7    | 18.8    | 10.3    | 0.053298922 | 6.5       | 15.95     | 9.45     | 0.407523511 | 0.03241    | 2.514  |
| 100352_at   | 86.1    | 81      | 103.5   | 144.4   | 86.4    | 108.8   | 100     | 164.6   | 0.63546774  | 103.75    | 114.95    | 11.2     | 0.902566333 | 0.6222     | -1.104 |
| 100353_g_at | 557.2   | 887.8   | 608.5   | 976.1   | 768.7   | 780.5   | 741.5   | 1103    | 0.522028575 | 757.4     | 848.425   | 91.025   | 0.892712968 | 0.4698     | 1.137  |
| 100354_at   | 1.8     | 3.2     | 1.4     | 1.5     | 2       | 1.2     | 1.2     | 2.4     | 0.613592375 | 1.975     | 1.7       | 0.275    | 1.161764706 | 0.6018     | -1.155 |
| 100355_g_at | 12.3    | 8.6     | 16.4    | 10.4    | 33.3    | 6.1     | 9.1     | 8.5     | 0.745242707 | 11.925    | 14.25     | 2.325    | 0.836842105 | 0.9304     | -1.037 |
| 100356_at   | 7.4     | 9.1     | 9.1     | 18.2    | 9.3     | 18.6    | 7.1     | 17      | 0.603788501 | 10.95     | 13        | 2.05     | 0.842307692 | 0.6262     | 1.17   |
| 100357_g_at | 189.3   | 141.1   | 193.8   | 193.9   | 133.5   | 170.9   | 124.3   | 141.1   | 0.066204409 | 179.525   | 142.45    | 37.075   | 1.26026676  | 0.06778    | -1.259 |
| 100358_s_at | 155.8   | 155.4   | 171.5   | 164.7   | 169.8   | 139.1   | 214.5   | 191.4   | 0.375375121 | 161.85    | 178.7     | 16.85    | 0.90570789  | 0.3965     | -1.091 |
| 100359_at   | 26.1    | 8.5     | 34      | 15.8    | 16.2    | 18.7    | 43.2    | 64.2    | 0.310539108 | 21.1      | 35.575    | 14.475   | 0.593113141 | 0.3199     | 1.629  |
| 100360_f_at | 204.2   | 236.3   | 229.3   | 227.6   | 286.2   | 243.1   | 190.2   | 274.4   | 0.35071661  | 224.35    | 248.475   | 24.125   | 0.902907737 | 0.3836     | -1.096 |
| 100361_f_at | 34      | 50.4    | 49.2    | 58      | 45.1    | 29.8    | 81.9    | 52.6    | 0.729358568 | 47.9      | 52.35     | 4.45     | 0.914995224 | 0.8655     | -1.043 |
| 100362_f_at | 30.5    | 14.5    | 27.6    | 15      | 24.1    | 37.3    | 18.2    | 48.7    | 0.259906231 | 21.9      | 32.075    | 10.175   | 0.682774747 | 0.2587     | 1.444  |
| 100363_at   | 16.3    | 28.8    | 6.6     | 13.7    | 3       | 23.9    | 6.9     | 4.8     | 0.354638203 | 16.35     | 9.65      | 6.7      | 1.694300518 | 0.229      | -2.062 |
| 100364_at   | 11.6    | 8.4     | 10.9    | 8.6     | 15.7    | 25.4    | 20.1    | 10      | 0.090588724 | 9.875     | 17.8      | 7.925    | 0.554775281 | 0.04602    | 1.718  |
| 100365_at   | 7.6     | 12.1    | 11.2    | 19.6    | 23.6    | 32.2    | 20.4    | 14      | 0.078538043 | 12.625    | 22.55     | 9.925    | 0.559866962 | 0.0635     | 1.806  |
| 100366_at   | 209.6   | 210.7   | 227.8   | 250.7   | 265     | 291     | 250.2   | 236.5   | 0.056293195 | 224.7     | 260.675   | 35.975   | 0.861992903 | 0.05112    | 1.16   |
| 100367_g_at | 197.8   | 180.1   | 237.6   | 202     | 234.6   | 270.9   | 275.5   | 244.3   | 0.016835372 | 204.375   | 256.325   | 51.95    | 0.797327611 | 0.0166     | 1.258  |
| 100368_at   | 109.3   | 117.3   | 127.8   | 141.9   | 117.9   | 147.2   | 73.7    | 96.7    | 0.423749291 | 124.075   | 108.875   | 15.2     | 1.139609644 | 0.3549     | -1.171 |
| 100369_at   | 30.2    | 130.2   | 116     | 80.1    | 130.4   | 147.1   | 74.7    | 66.2    | 0.624667904 | 89.125    | 104.6     | 15.475   | 0.852055449 | 0.56       | 1.269  |
| 100370_at   | 16.6    | 49.1    | 52.1    | 53.7    | 59      | 49.9    | 51.4    | 19.2    | 0.877579523 | 42.875    | 44.875    | 2        | 0.955431755 | 0.8778     | -1.064 |
| 100371_at   | 409.9   | 271.1   | 286.2   | 322.3   | 277.7   | 345.1   | 308.3   | 328     | 0.834860737 | 322.375   | 314.775   | 7.6      | 1.02414423  | 0.8964     | -1.014 |
| 100372_at   | 25.1    | 35.6    | 19.4    | 36.6    | 31.6    | 7       | 5.3     | 16.4    | 0.108629933 | 29.175    | 15.075    | 14.1     | 1.935323383 | 0.09137    | -2.401 |
| 100373_at   | 42.4    | 37.6    | 54.3    | 39.5    | 58      | 39.2    | 77      | 38.9    | 0.374031257 | 43.45     | 53.275    | 9.825    | 0.81557954  | 0.3843     | 1.189  |
| 100374_at   | 651.5   | 1033.6  | 839.1   | 1014.4  | 55.4    | 64.1    | 53.7    | 37.8    | 0.002544613 | 884.65    | 52.75     | 831.9    | 16.77061611 | 0.00000177 | -16.79 |
| 100375_i_at | 4.8     | 11.9    | 5.9     | 11.7    | 5.9     | 1.9     | 9.7     | 10.4    | 0.576852003 | 8.575     | 6.975     | 1.6      | 1.229390681 | 0.5156     | -1.376 |
| 100376_f_at | 59.6    | 23.1    | 36.2    | 19.6    | 28      | 16.4    | 39.8    | 11.9    | 0.377269627 | 34.625    | 24.025    | 10.6     | 1.441207076 | 0.3455     | -1.456 |
| 100377_f_at | 8.4     | 43.4    | 22.3    | 7.7     | 17.8    | 27.8    | 7.2     | 14.4    | 0.715260359 | 20.45     | 16.8      | 3.65     | 1.217261905 | 0.926      | -1.05  |
| 100378_at   | 7.8     | 11.4    | 21.4    | 17.3    | 19.4    | 11      | 47.5    | 21.8    | 0.285250548 | 14.475    | 24.925    | 10.45    | 0.580742227 | 0.2516     | 1.612  |



|             |        |        |        |        |        |        |        |        |             |          |          |         |             |          |        |
|-------------|--------|--------|--------|--------|--------|--------|--------|--------|-------------|----------|----------|---------|-------------|----------|--------|
| 100379_f_at | 2651.3 | 4122.1 | 4109.7 | 3591.6 | 8118.4 | 3892   | 5791   | 3743.1 | 0.183273002 | 3618.675 | 5386.125 | 1767.45 | 0.671851285 | 0.1362   | 1.435  |
| 100380_at   | 6003.9 | 5129.3 | 5235.3 | 5175.9 | 5419.1 | 5270.8 | 4734.1 | 4674.6 | 0.243980834 | 5386.1   | 5024.65  | 361.45  | 1.071935359 | 0.2352   | -1.072 |
| 100381_at   | 111.4  | 40.7   | 45.9   | 49.4   | 91.5   | 58.2   | 17.2   | 83.5   | 0.975643855 | 61.85    | 62.6     | 0.75    | 0.988019169 | 0.8747   | -1.077 |
| 100382_at   | 3.4    | 4.2    | 14     | 7.6    | 7.8    | 4.1    | 4.4    | 2.8    | 0.390938345 | 7.3      | 4.775    | 2.525   | 1.528795812 | 0.4151   | -1.4   |
| 100383_at   | 10.8   | 9      | 49.8   | 15.7   | 60.8   | 24.1   | 40.5   | 18.6   | 0.318531903 | 21.325   | 36       | 14.675  | 0.592361111 | 0.2016   | 1.952  |
| 100384_at   | 11.4   | 15.3   | 10.4   | 30.7   | 15.5   | 16     | 13.5   | 8.4    | 0.514380655 | 16.95    | 13.35    | 3.6     | 1.269662921 | 0.5695   | -1.188 |
| 100385_at   | 130.9  | 149.9  | 185.1  | 147.7  | 206.5  | 162.7  | 147    | 191.4  | 0.232665937 | 153.4    | 176.9    | 23.5    | 0.867156586 | 0.2271   | 1.152  |
| 100386_at   | 87.7   | 95.8   | 124.7  | 34.6   | 124.7  | 64.8   | 94.7   | 108    | 0.608123932 | 85.7     | 98.05    | 12.35   | 0.874043855 | 0.5343   | 1.229  |
| 100387_f_at | 1.5    | 5.4    | 3.2    | 2.2    | 1.6    | 2.8    | 3.5    | 0.9    | 0.432781035 | 3.075    | 2.2      | 0.875   | 1.397727273 | 0.3872   | -1.47  |
| 100388_at   | 7      | 7.5    | 11.5   | 17.5   | 16.9   | 8      | 15.5   | 6.1    | 0.842758983 | 10.875   | 11.625   | 0.75    | 0.935483871 | 0.8871   | -1.05  |
| 100389_at   | 168    | 156.1  | 188.5  | 90.6   | 193.9  | 137.7  | 70.6   | 194.9  | 0.967940261 | 150.8    | 149.275  | 1.525   | 1.010216044 | 0.8698   | -1.051 |
| 100390_s_at | 67.4   | 112.8  | 86.9   | 63.2   | 80.7   | 96.8   | 67.4   | 89.1   | 0.946010643 | 82.575   | 83.5     | 0.925   | 0.988922156 | 0.8552   | -1.03  |
| 100391_at   | 36.1   | 32.5   | 47.4   | 39.2   | 48.9   | 105.5  | 9.4    | 67     | 0.415713282 | 38.8     | 57.7     | 18.9    | 0.672443674 | 0.8574   | -1.105 |
| 100392_at   | 240.3  | 245.8  | 249    | 271.6  | 304.8  | 254.1  | 250.1  | 261.5  | 0.321176205 | 251.675  | 267.625  | 15.95   | 0.940401681 | 0.3031   | -1.061 |
| 100393_at   | 21.5   | 34.2   | 23.5   | 4.1    | 20.1   | 23.6   | 9.4    | 19.8   | 0.7256359   | 20.825   | 18.225   | 2.6     | 1.14266118  | 0.9175   | -1.057 |
| 100394_at   | 9.6    | 9.5    | 18.9   | 18.5   | 19.2   | 15.2   | 17     | 12.1   | 0.590919193 | 14.125   | 15.875   | 1.75    | 0.88976378  | 0.4952   | 1.171  |
| 100395_at   | 128.1  | 245.4  | 150.3  | 202.6  | 132.6  | 173.3  | 213.4  | 188.5  | 0.887766492 | 181.6    | 176.95   | 4.65    | 1.02627861  | 0.9626   | -1.009 |
| 100396_i_at | 73.3   | 73.9   | 35     | 22.7   | 71.2   | 112.2  | 43.5   | 21.2   | 0.665695611 | 51.225   | 62.025   | 10.8    | 0.825876663 | 0.7804   | 1.144  |
| 100397_at   | 386.5  | 243.7  | 332.9  | 263.7  | 617.1  | 351.1  | 323.8  | 427.4  | 0.16424765  | 306.7    | 429.85   | 123.15  | 0.713504711 | 0.1213   | 1.38   |
| 100398_at   | 164.7  | 129.5  | 152.3  | 206.7  | 84.5   | 164.8  | 145.6  | 157.5  | 0.342801992 | 163.3    | 138.1    | 25.2    | 1.182476466 | 0.3497   | -1.204 |
| 100400_at   | 389.6  | 265.9  | 313.2  | 379.3  | 290.8  | 375.3  | 366.8  | 277.4  | 0.815308184 | 337      | 327.575  | 9.425   | 1.028772037 | 0.836    | -1.026 |
| 100401_at   | 452.8  | 416    | 404.5  | 472.4  | 505.6  | 388.4  | 566    | 470.5  | 0.31489164  | 436.425  | 482.625  | 46.2    | 0.904273504 | 0.3242   | 1.098  |
| 100402_f_at | 4.3    | 6.1    | 29.9   | 12.9   | 14.1   | 24.6   | 12.7   | 25.5   | 0.421311074 | 13.3     | 19.225   | 5.925   | 0.691807542 | 0.2448   | 1.824  |
| 100403_at   | 50.5   | 39.8   | 50     | 12     | 16.8   | 33.3   | 66.1   | 6.3    | 0.657613788 | 38.075   | 30.625   | 7.45    | 1.243265306 | 0.5262   | -1.504 |
| 100404_at   | 1103.3 | 936.9  | 1046.9 | 1046.3 | 1225.9 | 991.2  | 1149.1 | 1339.6 | 0.146984442 | 1033.35  | 1176.45  | 143.1   | 0.878362871 | 0.1329   | 1.134  |
| 100405_at   | 526.6  | 137.1  | 166.2  | 361.8  | 119.6  | 365.8  | 179.1  | 428.4  | 0.840290254 | 297.925  | 273.225  | 24.7    | 1.090401684 | 0.8882   | -1.066 |
| 100406_at   | 33.1   | 36.2   | 14.9   | 12.6   | 20.6   | 20.9   | 15.2   | 18.6   | 0.446404632 | 24.2     | 18.825   | 5.375   | 1.285524568 | 0.6017   | -1.167 |
| 100407_at   | 240.2  | 210.5  | 289.8  | 289.9  | 334.1  | 248.4  | 252.8  | 300.9  | 0.386745101 | 257.6    | 284.05   | 26.45   | 0.906882591 | 0.3855   | -1.104 |
| 100408_at   | 421.9  | 250.3  | 395.6  | 354.3  | 305.4  | 283.8  | 271.9  | 327.5  | 0.222218872 | 355.525  | 297.15   | 58.375  | 1.196449605 | 0.2349   | -1.177 |
| 100409_at   | 559.3  | 800    | 638.8  | 709.7  | 423.7  | 563.8  | 495    | 687.5  | 0.127804719 | 676.95   | 542.5    | 134.45  | 1.247834101 | 0.1238   | -1.257 |
| 100410_at   | 686.1  | 461    | 568.2  | 586.3  | 520.7  | 577    | 510.6  | 541.7  | 0.481759713 | 575.4    | 537.5    | 37.9    | 1.070511628 | 0.5161   | -1.061 |
| 100411_at   | 1      | 0.9    | 1.4    | 1.2    | 1.4    | 2.8    | 1.3    | 15.6   | 0.316347372 | 1.125    | 5.275    | 4.15    | 0.213270142 | 0.1323   | 2.735  |
| 100412_g_at | 318.9  | 595    | 427.3  | 466.3  | 635.8  | 583.2  | 603.9  | 551.8  | 0.084067456 | 451.875  | 593.675  | 141.8   | 0.761148777 | 0.0663   | 1.345  |
| 100413_at   | 508.3  | 569.5  | 478.6  | 583.5  | 398.4  | 501.4  | 512.6  | 613.8  | 0.599647794 | 534.975  | 506.55   | 28.425  | 1.056114895 | 0.5531   | -1.065 |
| 100414_s_at | 11     | 44.1   | 49.2   | 45.7   | 52.4   | 52.4   | 11.9   | 35     | 0.975150096 | 37.5     | 37.925   | 0.425   | 0.988793672 | 0.9822   | -1.012 |
| 100415_at   | 40     | 54.5   | 52.9   | 45.6   | 82.5   | 49.3   | 67.7   | 33     | 0.436675303 | 48.25    | 58.125   | 9.875   | 0.830107527 | 0.5439   | 1.147  |
| 100416_at   | 80.6   | 54.3   | 49.6   | 66.1   | 66.2   | 43.4   | 53.8   | 60.4   | 0.462301783 | 62.65    | 55.95    | 6.7     | 1.119749777 | 0.4739   | -1.114 |
| 100417_at   | 119.4  | 97.9   | 90.5   | 109.3  | 13.9   | 89.6   | 78.6   | 96     | 0.162524568 | 104.275  | 69.525   | 34.75   | 1.499820209 | 0.2271   | -1.871 |
| 100418_at   | 93.8   | 110.1  | 95.4   | 74.3   | 100.7  | 106.9  | 83.9   | 78.4   | 0.929192195 | 93.4     | 92.475   | 0.925   | 1.010002703 | 0.9428   | -1.008 |
| 100420_at   | 19.6   | 20.5   | 31.4   | 56.4   | 31.1   | 57.7   | 97.7   | 33     | 0.25637904  | 31.975   | 54.875   | 22.9    | 0.582687927 | 0.2003   | 1.688  |
| 100421_at   | 307.9  | 195.4  | 304    | 393.4  | 390.3  | 217.9  | 226.4  | 475.6  | 0.730409564 | 300.175  | 327.55   | 27.375  | 0.916424973 | 0.813    | -1.062 |
| 100422_i_at | 390.8  | 394.4  | 393.9  | 467.3  | 562.4  | 438.2  | 387.5  | 419.3  | 0.394089726 | 411.6    | 451.85   | 40.25   | 0.910921766 | 0.3818   | -1.09  |
| 100423_f_at | 153.5  | 219.8  | 328.6  | 282.5  | 340.7  | 311.9  | 320.2  | 304.5  | 0.14892364  | 246.1    | 319.325  | 73.225  | 0.77068817  | 0.1254   | 1.349  |
| 100424_at   | 251.6  | 218.5  | 240.7  | 308.4  | 295.3  | 229.7  | 322.1  | 182.2  | 0.948297183 | 254.8    | 257.325  | 2.525   | 0.990187506 | 0.9675   | -1.006 |
| 100425_at   | 323    | 335.4  | 357.1  | 397.6  | 551.7  | 466.5  | 552    | 517.9  | 0.000746412 | 353.275  | 522.025  | 168.75  | 0.67673962  | 0.000637 | 1.479  |
| 100426_s_at | 5.5    | 6.9    | 5.7    | 10     | 6.4    | 15.4   | 7.9    | 10.6   | 0.235673237 | 7.025    | 10.075   | 3.05    | 0.697270471 | 0.1988   | 1.402  |
| 100427_at   | 110.8  | 155.9  | 98.2   | 146.4  | 121.2  | 94.3   | 121.5  | 159.7  | 0.856261764 | 127.825  | 124.175  | 3.65    | 1.029394    | 0.8605   | -1.029 |
| 100428_at   | 176.1  | 144.7  | 132.2  | 136.6  | 187.1  | 200.2  | 174.8  | 191.4  | 0.01724263  | 147.4    | 188.375  | 40.975  | 0.782481752 | 0.01176  | 1.285  |
| 100429_at   | 244.9  | 300.9  | 309.7  | 248.3  | 290.5  | 327.9  | 295.6  | 251.5  | 0.530215346 | 275.95   | 291.375  | 15.425  | 0.947061347 | 0.5259   | -1.057 |
| 100430_at   | 44.3   | 48     | 37.4   | 12.6   | 43.8   | 23.3   | 8.3    | 49.4   | 0.736177764 | 35.575   | 31.2     | 4.375   | 1.140224359 | 0.6865   | -1.243 |
| 100431_at   | 186    | 186.9  | 150.5  | 126.8  | 103.3  | 161.7  | 171.9  | 181.5  | 0.740271041 | 162.55   | 154.6    | 7.95    | 1.051423027 | 0.7168   | -1.062 |
| 100432_f_at | 276.3  | 402.2  | 286.1  | 365.1  | 534.9  | 580.5  | 457.3  | 812.6  | 0.033491076 | 332.425  | 596.325  | 263.9   | 0.557456085 | 0.009259 | 1.776  |
| 100433_r_at | 157    | 253.8  | 254.2  | 274    | 308.2  | 256.9  | 232.5  | 570.4  | 0.267060296 | 234.75   | 342      | 107.25  | 0.686403509 | 0.2124   | 1.395  |
| 100434_s_at | 12.8   | 12.6   | 14     | 81.2   | 66.8   | 22.7   | 24.7   | 297.6  | 0.353414728 | 30.15    | 102.95   | 72.8    | 0.292860612 | 0.2216   | 2.792  |
| 100435_at   | 1051.2 | 832.8  | 899.1  | 773    | 681.6  | 872.6  | 805    | 1003.9 | 0.611527211 | 889.025  | 840.775  | 48.25   | 1.057387529 | 0.5919   | -1.061 |
| 100436_at   | 2      | 4.2    | 5.1    | 15.7   | 3.5    | 13     | 2.2    | 16.1   | 0.68690727  | 6.75     | 8.7      | 1.95    | 0.775862069 | 0.7391   | 1.254  |



|             |        |        |        |        |        |        |        |        |             |          |          |         |             |          |        |
|-------------|--------|--------|--------|--------|--------|--------|--------|--------|-------------|----------|----------|---------|-------------|----------|--------|
| 100437_g_at | 9.3    | 14.8   | 19.2   | 19.4   | 14.8   | 18.4   | 20.6   | 17.9   | 0.440796133 | 15.675   | 17.925   | 2.25    | 0.874476987 | 0.3966   | 1.184  |
| 100438_at   | 165.3  | 129.9  | 177.4  | 131.1  | 200.4  | 201    | 95.5   | 147.4  | 0.733581386 | 150.925  | 161.075  | 10.15   | 0.936985876 | 0.8747   | -1.032 |
| 100439_i_at | 154.7  | 234.6  | 217    | 168.9  | 164.5  | 153.1  | 153.8  | 209.4  | 0.353458693 | 193.8    | 170.2    | 23.6    | 1.1386604   | 0.3549   | -1.132 |
| 100440_f_at | 344    | 360    | 466    | 425.1  | 403.9  | 461    | 390.3  | 393.8  | 0.699657676 | 398.775  | 412.25   | 13.475  | 0.967313523 | 0.6511   | -1.039 |
| 100441_s_at | 9.3    | 20.9   | 47.3   | 22.9   | 14.2   | 7.9    | 17.4   | 24.6   | 0.354847132 | 25.1     | 16.025   | 9.075   | 1.566302652 | 0.398    | -1.45  |
| 100442_at   | 253.3  | 281.3  | 285.2  | 292.4  | 269.7  | 229.5  | 275.1  | 321.2  | 0.849068012 | 278.05   | 273.875  | 4.175   | 1.015244181 | 0.7927   | -1.021 |
| 100443_at   | 686    | 1022.3 | 891.6  | 890    | 493.7  | 725.9  | 612.8  | 326.6  | 0.024539499 | 872.475  | 539.75   | 332.725 | 1.616442798 | 0.03688  | -1.669 |
| 100444_at   | 1380   | 1521.3 | 1542.4 | 1543.6 | 1493.6 | 1084.2 | 1222.6 | 1106.1 | 0.056659978 | 1496.825 | 1226.625 | 270.2   | 1.220279221 | 0.03837  | -1.229 |
| 100445_f_at | 3.9    | 2.2    | 1.6    | 3.6    | 2.1    | 1.6    | 2      | 2.2    | 0.221598471 | 2.825    | 1.975    | 0.85    | 1.430379747 | 0.2107   | -1.361 |
| 100446_r_at | 5510.1 | 4705   | 4884.4 | 3534.4 | 6760.7 | 3773   | 4929.1 | 5950.9 | 0.405636958 | 4658.475 | 5353.425 | 694.95  | 0.870185909 | 0.4467   | 1.137  |
| 100447_at   | 710    | 947.8  | 818    | 710.9  | 996.5  | 814.2  | 943.5  | 852.2  | 0.189369448 | 796.675  | 901.6    | 104.925 | 0.883623558 | 0.1743   | 1.136  |
| 100448_at   | 326.9  | 355    | 312.4  | 411.3  | 322.7  | 345.9  | 323.2  | 305.3  | 0.312577483 | 351.4    | 324.275  | 27.125  | 1.083648138 | 0.2921   | -1.079 |
| 100449_g_at | 344.9  | 379.9  | 254.7  | 374    | 332.8  | 291.2  | 305.4  | 301.7  | 0.375496067 | 338.375  | 307.775  | 30.6    | 1.09942328  | 0.4221   | -1.087 |
| 100450_r_at | 492.9  | 627.1  | 549.4  | 597.9  | 536    | 484.1  | 581.4  | 402.4  | 0.225381336 | 566.825  | 500.975  | 65.85   | 1.131443685 | 0.226    | -1.137 |
| 100451_at   | 200.9  | 290.6  | 292.3  | 295.6  | 233.3  | 250.5  | 257.1  | 306.6  | 0.785609433 | 269.85   | 261.875  | 7.975   | 1.030453461 | 0.8436   | -1.023 |
| 100452_at   | 157.2  | 70.1   | 138.6  | 175    | 152.4  | 109.4  | 164.1  | 152.4  | 0.734428724 | 135.225  | 144.575  | 9.35    | 0.935327685 | 0.6396   | 1.117  |
| 100453_at   | 90.6   | 48.4   | 29.9   | 17.4   | 16.2   | 107.6  | 70.2   | 102.3  | 0.340185018 | 46.575   | 74.075   | 27.5    | 0.628754641 | 0.4812   | 1.529  |
| 100454_at   | 284.8  | 261    | 332    | 204.6  | 387.9  | 281.3  | 356.4  | 267.7  | 0.22877091  | 270.6    | 323.325  | 52.725  | 0.836928787 | 0.2301   | 1.198  |
| 100455_at   | 31     | 54     | 55.3   | 43.8   | 34     | 46.9   | 51.1   | 57.6   | 0.860953499 | 46.025   | 47.4     | 1.375   | 0.970991561 | 0.8409   | -1.037 |
| 100457_at   | 762.3  | 1278.8 | 1175.8 | 1411   | 1103.9 | 1148.5 | 1294.4 | 1293.4 | 0.740072024 | 1156.975 | 1210.05  | 53.075  | 0.956138176 | 0.6488   | -1.07  |
| 100458_at   | 54.1   | 50     | 49     | 57.1   | 87.3   | 60.2   | 43.4   | 73     | 0.247152331 | 52.55    | 65.975   | 13.425  | 0.796513831 | 0.2465   | 1.218  |
| 100459_at   | 813.2  | 780.5  | 738.3  | 929    | 641.9  | 646.4  | 914.3  | 988.2  | 0.867263734 | 815.25   | 797.7    | 17.55   | 1.022000752 | 0.7725   | -1.038 |
| 100460_at   | 516.1  | 691.9  | 657.9  | 760.5  | 477.5  | 709    | 667.3  | 652.9  | 0.694302599 | 656.6    | 626.675  | 29.925  | 1.047752025 | 0.7059   | -1.049 |
| 100461_at   | 2024.1 | 1657.4 | 2046.6 | 1715.1 | 2540.3 | 1868.4 | 2101.1 | 1846.6 | 0.283623951 | 1860.8   | 2089.1   | 228.3   | 0.890718491 | 0.2703   | -1.118 |
| 100462_at   | 51.7   | 71.2   | 68     | 61.3   | 32.7   | 44.4   | 40.9   | 43.8   | 0.006611519 | 63.05    | 40.45    | 22.6    | 1.558714462 | 0.004409 | -1.558 |
| 100463_at   | 3.9    | 7.3    | 5.1    | 9.6    | 5.4    | 7      | 2.9    | 7.6    | 0.66364326  | 6.475    | 5.725    | 0.75    | 1.131004367 | 0.6858   | -1.132 |
| 100464_at   | 765.9  | 606.8  | 650.8  | 771.2  | 458.6  | 742.9  | 661.7  | 869.1  | 0.877669646 | 698.675  | 683.075  | 15.6    | 1.022837902 | 0.7789   | -1.045 |
| 100465_i_at | 1138.9 | 1217.5 | 1234.8 | 726.3  | 1840.3 | 1204.9 | 1638.9 | 1007.8 | 0.188357503 | 1079.375 | 1422.975 | 343.6   | 0.758534057 | 0.199    | 1.31   |
| 100466_f_at | 2648   | 2136   | 2050   | 1836   | 3278.2 | 2149.4 | 2599.4 | 2506.4 | 0.166249314 | 2167.5   | 2633.35  | 465.85  | 0.823096056 | 0.1492   | 1.212  |
| 100467_at   | 45.3   | 63.5   | 52.4   | 47.2   | 65.6   | 44.8   | 62.2   | 86.2   | 0.247289262 | 52.1     | 64.7     | 12.6    | 0.805255023 | 0.245    | 1.22   |
| 100468_g_at | 60.3   | 108.3  | 86     | 74.1   | 193.9  | 94.9   | 115.6  | 131.6  | 0.088696565 | 82.175   | 134      | 51.825  | 0.613246269 | 0.04996  | 1.61   |
| 100469_at   | 418.3  | 523.9  | 466.6  | 433.6  | 331.8  | 489.9  | 506.8  | 334    | 0.442589149 | 460.6    | 415.625  | 44.975  | 1.108210526 | 0.3831   | -1.127 |
| 100470_at   | 202    | 155.5  | 211.7  | 235    | 168.7  | 256.7  | 247.5  | 220.4  | 0.423218793 | 201.05   | 223.325  | 22.275  | 0.900257472 | 0.4545   | -1.109 |
| 100471_at   | 786.3  | 827.4  | 772.7  | 643.6  | 852.8  | 928.2  | 889.8  | 808.7  | 0.061969095 | 757.5    | 869.875  | 112.375 | 0.870814772 | 0.06355  | 1.152  |
| 100472_at   | 566.7  | 672.4  | 545.4  | 664.2  | 423.3  | 529.2  | 435.2  | 604.4  | 0.080985658 | 612.175  | 498.025  | 114.15  | 1.229205361 | 0.07741  | -1.237 |
| 100473_at   | 201.8  | 180.8  | 252.5  | 210.8  | 172.5  | 210.2  | 231    | 230.8  | 0.986870724 | 211.475  | 211.125  | 0.35    | 1.001657786 | 0.9909   | -1.001 |
| 100474_at   | 426.7  | 370.5  | 373.9  | 363.8  | 360.6  | 433.6  | 408.6  | 423    | 0.335081776 | 383.725  | 406.45   | 22.725  | 0.944089064 | 0.3376   | -1.059 |
| 100475_at   | 381.5  | 527.5  | 402.3  | 516    | 318.7  | 713.4  | 502.8  | 519.5  | 0.556527086 | 456.825  | 513.6    | 56.775  | 0.889456776 | 0.6526   | -1.092 |
| 100476_at   | 16.7   | 3.1    | 2      | 14.6   | 16.4   | 3.5    | 7      | 18     | 0.697119831 | 9.1      | 11.225   | 2.125   | 0.810690423 | 0.5752   | 1.48   |
| 100477_at   | 944.3  | 711    | 863.2  | 774.7  | 689.5  | 816.9  | 801.9  | 797.8  | 0.464020288 | 823.3    | 776.525  | 46.775  | 1.060236309 | 0.4816   | -1.057 |
| 100479_at   | 137.7  | 146.7  | 145.6  | 182.1  | 262.4  | 219.5  | 192.8  | 239    | 0.007334093 | 153.025  | 228.425  | 75.4    | 0.669913538 | 0.004321 | 1.492  |
| 100481_at   | 123    | 142.9  | 75.4   | 153.7  | 75.9   | 140.1  | 153    | 147.3  | 0.837916386 | 123.75   | 129.075  | 5.325   | 0.958744916 | 0.8662   | -1.041 |
| 100482_at   | 460    | 663.2  | 669.7  | 604.5  | 775.5  | 696.7  | 759.2  | 739    | 0.054223513 | 599.35   | 742.6    | 143.25  | 0.807096687 | 0.04809  | 1.252  |
| 100483_at   | 470.7  | 605.3  | 559.9  | 490.6  | 718.4  | 616.4  | 533.6  | 473.1  | 0.42422761  | 531.625  | 585.375  | 53.75   | 0.908178518 | 0.4388   | -1.093 |
| 100484_at   | 20.9   | 17     | 22.5   | 27.5   | 7.8    | 13.5   | 27.4   | 33.3   | 0.82736142  | 21.975   | 20.5     | 1.475   | 1.07195122  | 0.5757   | -1.228 |
| 100486_at   | 446.3  | 381.7  | 377.7  | 510.3  | 337    | 447    | 366.1  | 574.4  | 0.973884158 | 429      | 431.125  | 2.125   | 0.995071035 | 0.9504   | -1.009 |
| 100488_at   | 723    | 795.3  | 720.6  | 940.1  | 727.9  | 742.8  | 757    | 725    | 0.353217967 | 794.75   | 738.175  | 56.575  | 1.076641718 | 0.3225   | -1.07  |
| 100489_at   | 138.5  | 206.2  | 225.8  | 229.5  | 145.8  | 209.8  | 162    | 218    | 0.581144888 | 200      | 183.9    | 16.1    | 1.08754758  | 0.6269   | -1.082 |
| 100491_at   | 370.6  | 508.5  | 400.9  | 421.1  | 491    | 542.2  | 580.9  | 486.6  | 0.038770527 | 425.275  | 525.175  | 99.9    | 0.809777693 | 0.03521  | 1.24   |
| 100492_at   | 822    | 1085.4 | 949.2  | 879.6  | 1184.2 | 902    | 1067   | 1195   | 0.136889362 | 934.05   | 1087.05  | 153     | 0.859252104 | 0.1391   | 1.163  |
| 100493_at   | 103.3  | 155    | 149.9  | 68.3   | 133.7  | 161    | 151.4  | 104.2  | 0.477850701 | 119.125  | 137.575  | 18.45   | 0.865891332 | 0.4286   | 1.2    |
| 100494_at   | 65.9   | 44.6   | 29     | 68     | 58     | 56.6   | 42.3   | 55     | 0.91748679  | 51.875   | 52.975   | 1.1     | 0.979235488 | 0.7564   | -1.072 |
| 100495_at   | 262.6  | 413.7  | 426.1  | 516    | 265.5  | 393.8  | 518.1  | 419.9  | 0.945438014 | 404.6    | 399.325  | 5.275   | 1.013209792 | 0.9532   | -1.012 |
| 100496_at   | 32.2   | 152.8  | 121.1  | 80.5   | 100.8  | 75.1   | 339.2  | 127.7  | 0.384786385 | 96.65    | 160.7    | 64.05   | 0.601431238 | 0.3498   | 1.617  |
| 100497_at   | 4      | 7.8    | 6.2    | 12.6   | 31.3   | 5.3    | 11.5   | 7.8    | 0.371030753 | 7.65     | 13.975   | 6.325   | 0.547406082 | 0.3531   | 1.571  |
| 100498_g_at | 88.5   | 27.1   | 27.1   | 16.7   | 39.4   | 62.8   | 39.5   | 33.7   | 0.831857842 | 39.85    | 43.85    | 4       | 0.908779932 | 0.4918   | 1.321  |



|             |         |        |        |        |         |        |         |        |             |          |           |         |             |          |        |
|-------------|---------|--------|--------|--------|---------|--------|---------|--------|-------------|----------|-----------|---------|-------------|----------|--------|
| 100499_at   | 82.5    | 79.4   | 86     | 79.7   | 66.9    | 87.5   | 69.2    | 77.5   | 0.255310167 | 81.9     | 75.275    | 6.625   | 1.088010628 | 0.2101   | -1.093 |
| 100500_at   | 351.9   | 401.9  | 298.2  | 332.6  | 258.1   | 319.5  | 239.8   | 273.1  | 0.039087675 | 346.15   | 272.625   | 73.525  | 1.269692801 | 0.03356  | -1.27  |
| 100501_at   | 6.1     | 5.6    | 7.1    | 6.6    | 7       | 7.8    | 6.9     | 5.8    | 0.355961795 | 6.35     | 6.875     | 0.525   | 0.923636364 | 0.3424   | -1.085 |
| 100502_at   | 5       | 3.7    | 5.9    | 11.6   | 4.1     | 8.3    | 24.9    | 18     | 0.223807507 | 6.55     | 13.825    | 7.275   | 0.473779385 | 0.2332   | 1.868  |
| 100505_at   | 8       | 14.5   | 10.9   | 5.6    | 6.8     | 11.5   | 21.1    | 10.9   | 0.465794984 | 9.75     | 12.575    | 2.825   | 0.775347913 | 0.4775   | 1.264  |
| 100507_at   | 18.4    | 71.7   | 19.7   | 104.7  | 56.9    | 85.4   | 38.9    | 29.2   | 0.96819609  | 53.625   | 52.6      | 1.025   | 1.019486692 | 0.7366   | 1.193  |
| 100508_at   | 136.9   | 196.3  | 143.9  | 126.7  | 196.4   | 149.9  | 149.7   | 252.1  | 0.265432477 | 150.95   | 187.025   | 36.075  | 0.807111349 | 0.2422   | 1.227  |
| 100509_at   | 1297.6  | 1296.6 | 1173.5 | 1299.1 | 1122.7  | 1338.2 | 1328.6  | 1404.6 | 0.663799663 | 1266.7   | 1298.525  | 31.825  | 0.975491423 | 0.7006   | -1.022 |
| 100510_at   | 130.1   | 100    | 170.2  | 173.6  | 129     | 156.9  | 119.8   | 221.5  | 0.662013392 | 143.475  | 156.8     | 13.325  | 0.915019133 | 0.6747   | -1.087 |
| 100511_at   | 103.1   | 156.4  | 152.5  | 128.1  | 148.1   | 179.7  | 172.2   | 126.5  | 0.257950315 | 135.025  | 156.625   | 21.6    | 0.862090982 | 0.2688   | 1.165  |
| 100512_at   | 412.8   | 306.2  | 335.3  | 362.9  | 258.6   | 331.7  | 323.4   | 363.7  | 0.311385132 | 354.3    | 319.35    | 34.95   | 1.109441052 | 0.3147   | -1.111 |
| 100513_at   | 435.8   | 719.8  | 472.1  | 497.9  | 625.5   | 635    | 524.1   | 661.5  | 0.317385894 | 531.4    | 611.525   | 80.125  | 0.868975103 | 0.2496   | 1.169  |
| 100514_at   | 952.6   | 817.1  | 936.7  | 1132   | 597.3   | 1089.5 | 830.3   | 935.9  | 0.465458453 | 959.6    | 863.25    | 96.35   | 1.11161309  | 0.4281   | -1.13  |
| 100515_at   | 545.1   | 996.4  | 780.7  | 790    | 944     | 846    | 914.3   | 848.5  | 0.322591766 | 778.05   | 888.2     | 110.15  | 0.875985138 | 0.2735   | 1.166  |
| 100516_at   | 342.8   | 470.7  | 420.1  | 577.8  | 447.2   | 533.8  | 533.6   | 663.9  | 0.217242889 | 452.85   | 544.625   | 91.775  | 0.831489557 | 0.2063   | 1.212  |
| 100518_at   | 60.3    | 68.2   | 73     | 84     | 59.9    | 35.7   | 81.1    | 50.9   | 0.239927845 | 71.375   | 56.9      | 14.475  | 1.254393673 | 0.2047   | -1.299 |
| 100521_at   | 92.6    | 100.8  | 97.6   | 98.7   | 114.8   | 117.6  | 127.7   | 167.6  | 0.06497448  | 97.425   | 131.925   | 34.5    | 0.738487777 | 0.01652  | 1.339  |
| 100522_s_at | 9759.5  | 8767.9 | 9498.8 | 9533.8 | 11939.7 | 9537.6 | 10598.5 | 9064.7 | 0.260227263 | 9390     | 10285.125 | 895.125 | 0.912968972 | 0.235    | -1.09  |
| 100523_r_at | 1752.1  | 1343.6 | 1358.3 | 1439.9 | 1480.3  | 1308.1 | 1585.7  | 1162.8 | 0.528359656 | 1473.475 | 1384.225  | 89.25   | 1.064476512 | 0.5159   | -1.066 |
| 100525_at   | 535.2   | 575.8  | 589    | 611.7  | 846     | 540.3  | 672.4   | 678.1  | 0.188147047 | 577.925  | 684.2     | 106.275 | 0.84467261  | 0.1514   | 1.17   |
| 100526_f_at | 5.1     | 11.2   | 13.2   | 3.9    | 6.1     | 5.5    | 27      | 22.7   | 0.311215457 | 8.35     | 15.325    | 6.975   | 0.544861338 | 0.3796   | 1.627  |
| 100527_at   | 1551.6  | 1765.2 | 1513.9 | 1180.9 | 2653.8  | 1264.8 | 1705.4  | 1284.6 | 0.554804224 | 1502.9   | 1727.15   | 224.25  | 0.870161827 | 0.6165   | 1.107  |
| 100528_at   | 515.2   | 602.8  | 512.3  | 707.2  | 349.9   | 565.7  | 599.1   | 663    | 0.645813115 | 584.375  | 544.425   | 39.95   | 1.073380172 | 0.5986   | -1.094 |
| 100529_at   | 256.8   | 486    | 407.2  | 418.7  | 322.5   | 426.2  | 423.3   | 524    | 0.634469041 | 392.175  | 424       | 31.825  | 0.924941038 | 0.6166   | -1.094 |
| 100530_at   | 743.9   | 866.3  | 780    | 752.3  | 702.5   | 828.2  | 830.7   | 1045.3 | 0.437404344 | 785.625  | 851.675   | 66.05   | 0.922446943 | 0.4457   | -1.075 |
| 100533_s_at | 170.5   | 108.7  | 116.5  | 122.2  | 129.6   | 170.8  | 140.1   | 122.7  | 0.543888019 | 129.475  | 140.8     | 11.325  | 0.919566761 | 0.4874   | -1.096 |
| 100534_at   | 1609.2  | 1236.1 | 1155.1 | 1361.7 | 1006.1  | 1362.4 | 1369    | 1561   | 0.920376338 | 1340.525 | 1324.625  | 15.9    | 1.012003397 | 0.8933   | -1.017 |
| 100535_at   | 419.1   | 483.3  | 492.2  | 460.1  | 610.1   | 499.1  | 514     | 573.7  | 0.037820627 | 463.675  | 549.225   | 85.55   | 0.844235058 | 0.02971  | 1.183  |
| 100536_at   | 3.2     | 2.1    | 2      | 2.2    | 1.9     | 1.9    | 2.2     | 3.7    | 0.926015571 | 2.375    | 2.425     | 0.05    | 0.979381443 | 0.9983   | -1     |
| 100537_at   | 10.9    | 8.5    | 8.7    | 4      | 3.6     | 8.7    | 10.3    | 30.3   | 0.446571193 | 8.025    | 13.225    | 5.2     | 0.606805293 | 0.5911   | 1.319  |
| 100538_at   | 3615.5  | 3285.7 | 3539.4 | 2559.7 | 3835    | 2952.8 | 3275.8  | 3313.7 | 0.766318015 | 3250.075 | 3344.325  | 94.25   | 0.97181793  | 0.7407   | -1.034 |
| 100539_at   | 505.8   | 572.8  | 563.9  | 472.8  | 614.7   | 647.9  | 536.1   | 603.4  | 0.075883142 | 528.825  | 600.525   | 71.7    | 0.880604471 | 0.0796   | 1.136  |
| 100540_at   | 2549.6  | 2168.3 | 2431.9 | 2360.1 | 2598    | 2602.6 | 2547.1  | 3244.4 | 0.109314277 | 2377.475 | 2748.025  | 370.55  | 0.865157704 | 0.07798  | 1.152  |
| 100542_at   | 8.4     | 32.5   | 24.9   | 13.7   | 31      | 18.9   | 11.8    | 31.2   | 0.659825589 | 19.875   | 23.225    | 3.35    | 0.855758881 | 0.6045   | 1.232  |
| 100543_s_at | 1429.4  | 1177   | 1283.5 | 1148.9 | 1047    | 1244   | 1321.1  | 1178.9 | 0.49899325  | 1259.7   | 1197.75   | 61.95   | 1.051721979 | 0.4988   | -1.052 |
| 100544_at   | 227.4   | 181    | 221.5  | 206.3  | 157.9   | 232.8  | 201.1   | 191.6  | 0.507481563 | 209.05   | 195.85    | 13.2    | 1.067398519 | 0.484    | -1.073 |
| 100546_at   | 71      | 79.1   | 91.3   | 59.8   | 52.2    | 70.5   | 66.6    | 76.5   | 0.335743677 | 75.3     | 66.45     | 8.85    | 1.133182844 | 0.3496   | -1.131 |
| 100547_at   | 794     | 705.1  | 745.5  | 722.3  | 625.6   | 759    | 453.1   | 890.2  | 0.572475091 | 741.725  | 681.975   | 59.75   | 1.087613182 | 0.471    | -1.12  |
| 100548_at   | 1404.6  | 733.7  | 572.1  | 767.9  | 831.6   | 615.5  | 694.7   | 1166.9 | 0.854521943 | 869.575  | 827.175   | 42.4    | 1.051258803 | 0.9294   | -1.022 |
| 100549_at   | 98.5    | 89.7   | 131.7  | 88.1   | 61.1    | 101    | 83.4    | 95.6   | 0.261849345 | 102      | 85.275    | 16.725  | 1.196130167 | 0.2555   | -1.202 |
| 100550_f_at | 10310.9 | 9545.5 | 9759.2 | 9241.1 | 14620   | 9380.5 | 11232   | 9350.4 | 0.333537295 | 9714.175 | 11145.725 | 1431.55 | 0.871560621 | 0.3045   | 1.129  |
| 100551_r_at | 9.8     | 10.7   | 10.2   | 10.1   | 43.4    | 12.1   | 14      | 12.1   | 0.276142138 | 10.2     | 20.4      | 10.2    | 0.5         | 0.1379   | 1.697  |
| 100552_at   | 374.2   | 302.7  | 293.7  | 290.2  | 304.1   | 348.7  | 287.4   | 261.6  | 0.604638789 | 315.2    | 300.45    | 14.75   | 1.049093027 | 0.5918   | -1.049 |
| 100553_at   | 1046.8  | 1390.1 | 1229   | 1301.8 | 1126.2  | 1055.8 | 1316.2  | 1361.5 | 0.803042129 | 1241.925 | 1214.925  | 27      | 1.022223594 | 0.8053   | -1.022 |
| 100554_at   | 867.7   | 534.9  | 697    | 693.1  | 419.7   | 502.3  | 489.3   | 433.4  | 0.03474559  | 698.175  | 461.175   | 237     | 1.5139047   | 0.009849 | -1.496 |
| 100555_at   | 1962.1  | 1943.8 | 1845.3 | 1937.6 | 1661.2  | 2096   | 1870.7  | 1864.7 | 0.627933863 | 1922.2   | 1873.15   | 49.05   | 1.026185837 | 0.5795   | -1.029 |
| 100556_at   | 6.4     | 17     | 5.7    | 42.5   | 37.4    | 13     | 26.5    | 35.7   | 0.362138299 | 17.9     | 28.15     | 10.25   | 0.635879218 | 0.2264   | 2.038  |
| 100557_g_at | 2728.1  | 2335.3 | 2465.4 | 2414.4 | 1281.8  | 2388.1 | 1953.3  | 2230.9 | 0.119051555 | 2485.8   | 1963.525  | 522.275 | 1.265988465 | 0.1186   | -1.299 |
| 100558_at   | 11.2    | 36     | 44.8   | 13.7   | 7.1     | 4.1    | 20.2    | 9.6    | 0.145727015 | 26.425   | 10.25     | 16.175  | 2.57804878  | 0.09643  | -2.569 |
| 100559_at   | 209.8   | 320.3  | 256.4  | 327.5  | 320.4   | 272.8  | 289.9   | 250    | 0.886394245 | 278.5    | 283.275   | 4.775   | 0.983143588 | 0.8138   | -1.029 |
| 100560_at   | 911.5   | 858.9  | 862.9  | 869.1  | 888.5   | 1021.1 | 762.9   | 815.2  | 0.952574085 | 875.6    | 871.925   | 3.675   | 1.004214812 | 0.8817   | -1.01  |
| 100561_at   | 1027.6  | 833.6  | 886.7  | 1081.9 | 784.5   | 1014.2 | 655.5   | 983.6  | 0.38266227  | 957.45   | 859.45    | 98      | 1.114026412 | 0.3622   | -1.125 |
| 100562_at   | 615.5   | 609    | 645.1  | 582.6  | 846.8   | 482.7  | 574.3   | 602.8  | 0.873398059 | 613.05   | 626.65    | 13.6    | 0.978297295 | 0.993    | -1.001 |
| 100564_at   | 938.4   | 815.5  | 860.6  | 641.2  | 1279.4  | 913.4  | 936.5   | 924.2  | 0.121947642 | 813.925  | 1013.375  | 199.45  | 0.803182435 | 0.1069   | 1.244  |
| 100565_at   | 637.1   | 427.8  | 609.6  | 573.6  | 366.9   | 583    | 486.2   | 474.8  | 0.237411815 | 562.025  | 477.725   | 84.3    | 1.176461353 | 0.2559   | -1.179 |
| 100566_at   | 2654.4  | 3898.3 | 3019.4 | 3032.4 | 2862.1  | 3013.7 | 2624.5  | 3741.2 | 0.808023872 | 3151.125 | 3060.375  | 90.75   | 1.029653229 | 0.8077   | -1.028 |



|             |         |         |         |        |         |         |         |        |             |           |          |          |             |          |        |
|-------------|---------|---------|---------|--------|---------|---------|---------|--------|-------------|-----------|----------|----------|-------------|----------|--------|
| 100567_at   | 55.9    | 41.2    | 51.9    | 56.1   | 15.1    | 33.6    | 46.1    | 29.3   | 0.042200071 | 51.275    | 31.025   | 20.25    | 1.652699436 | 0.05982  | -1.77  |
| 100568_at   | 1399.9  | 1096.6  | 1230.1  | 1456.1 | 1189.8  | 1220.8  | 1419.2  | 1391.2 | 0.9275683   | 1295.675  | 1305.25  | 9.575    | 0.992664241 | 0.898    | -1.011 |
| 100569_at   | 11132.3 | 11326.5 | 12253.8 | 9329.9 | 17163.3 | 10555.4 | 12848.7 | 8722.6 | 0.535316835 | 11010.625 | 12322.5  | 1311.875 | 0.893538243 | 0.602    | -1.089 |
| 100570_at   | 582.9   | 704.2   | 609     | 601.7  | 713.3   | 590.6   | 604.9   | 547.4  | 0.823496656 | 624.45    | 614.05   | 10.4     | 1.016936732 | 0.7954   | -1.019 |
| 100571_at   | 2700.6  | 1855.4  | 1985.4  | 1740.5 | 1395.4  | 2014.5  | 1683.2  | 1747   | 0.211427962 | 2070.475  | 1710.025 | 360.45   | 1.210786392 | 0.1842   | -1.203 |
| 100572_at   | 544.1   | 566.3   | 583.2   | 799.2  | 324.6   | 675.1   | 532.2   | 540.9  | 0.305895113 | 623.2     | 518.2    | 105      | 1.202624469 | 0.292    | -1.228 |
| 100573_f_at | 505.2   | 359.5   | 423.8   | 464.9  | 343.4   | 372.5   | 373.6   | 489.5  | 0.368782734 | 438.35    | 394.75   | 43.6     | 1.110449652 | 0.3561   | -1.112 |
| 100574_f_at | 7617.6  | 7502.9  | 5777.7  | 7374.2 | 8307.3  | 7443.6  | 6632.7  | 7655.4 | 0.457022991 | 7068.1    | 7509.75  | 441.65   | 0.941189787 | 0.4593   | -1.066 |
| 100575_at   | 555.5   | 797.7   | 512.3   | 487.8  | 1006.5  | 602.3   | 580     | 591.2  | 0.433614306 | 588.325   | 695      | 106.675  | 0.846510791 | 0.3995   | 1.171  |
| 100576_at   | 1995.8  | 1803    | 1794.4  | 1582   | 2425.7  | 1715.5  | 1728.9  | 1724.8 | 0.61699742  | 1793.8    | 1898.725 | 104.925  | 0.944739233 | 0.6368   | -1.05  |
| 100577_at   | 398.5   | 307.2   | 331.2   | 371.7  | 334.8   | 367.5   | 311.6   | 292.6  | 0.366034924 | 352.15    | 326.625  | 25.525   | 1.078147723 | 0.3687   | -1.077 |
| 100578_at   | 3119.2  | 3233.2  | 2545.3  | 2672.3 | 2637.7  | 2780.3  | 2664.2  | 3143.5 | 0.689514518 | 2892.5    | 2806.425 | 86.075   | 1.030670693 | 0.7096   | -1.028 |
| 100579_s_at | 1524    | 2039.8  | 1884.3  | 1953   | 2009.5  | 2023.6  | 2184.6  | 1658.4 | 0.482207604 | 1850.275  | 1969.025 | 118.75   | 0.939690964 | 0.4965   | -1.065 |
| 100580_at   | 39.1    | 13.3    | 59      | 11.9   | 75.3    | 53.6    | 20.2    | 18.3   | 0.559581871 | 30.825    | 41.85    | 11.025   | 0.73655914  | 0.5312   | 1.422  |
| 100581_at   | 3991.8  | 3211.8  | 3607.5  | 3879.5 | 3768.3  | 3466.1  | 3796.2  | 4090.2 | 0.636769286 | 3672.65   | 3780.2   | 107.55   | 0.971549124 | 0.6235   | -1.031 |
| 100582_at   | 350.8   | 465.6   | 501.8   | 623.8  | 411.9   | 470.7   | 396.8   | 548.6  | 0.683661535 | 485.5     | 457      | 28.5     | 1.062363239 | 0.743    | -1.049 |
| 100583_at   | 84.8    | 113.7   | 83.6    | 61     | 139.9   | 56.4    | 23.6    | 187.4  | 0.705431814 | 85.775    | 101.825  | 16.05    | 0.842376627 | 0.8661   | -1.089 |
| 100584_at   | 866.9   | 591     | 864.7   | 713    | 543.1   | 846.1   | 792.9   | 825    | 0.943776035 | 758.9     | 751.775  | 7.125    | 1.00947757  | 0.9318   | -1.012 |
| 100585_at   | 10.7    | 28.7    | 14.4    | 14.9   | 11.3    | 10.3    | 75.6    | 12.6   | 0.573974793 | 17.175    | 27.45    | 10.275   | 0.62568306  | 0.8075   | 1.141  |
| 100586_i_at | 42      | 34.3    | 85.4    | 78.9   | 135.3   | 71.7    | 65.4    | 53     | 0.385561831 | 60.15     | 81.35    | 21.2     | 0.739397664 | 0.3461   | 1.364  |
| 100587_f_at | 452.7   | 350.1   | 324.1   | 536    | 469.9   | 413.5   | 442.8   | 493.8  | 0.49282305  | 415.725   | 455      | 39.275   | 0.913681319 | 0.4094   | -1.114 |
| 100588_at   | 1242.6  | 1167.1  | 1362.2  | 1269.1 | 1941.9  | 1288.9  | 1655.6  | 987.4  | 0.395054775 | 1260.25   | 1468.45  | 208.2    | 0.858217849 | 0.4495   | 1.13   |
| 100589_at   | 69.8    | 102.7   | 114.8   | 66.9   | 48.3    | 64.8    | 58.8    | 54.3   | 0.07029723  | 88.55     | 56.55    | 32       | 1.565870911 | 0.02929  | -1.531 |
| 100592_at   | 2551    | 2134.7  | 2522    | 2235.7 | 1924.9  | 2344.2  | 2297.8  | 2100.3 | 0.219774086 | 2360.85   | 2166.8   | 194.05   | 1.089556027 | 0.2232   | -1.09  |
| 100593_at   | 97.8    | 72      | 137.6   | 115.1  | 71.2    | 71.9    | 60.4    | 66.6   | 0.068312519 | 105.625   | 67.525   | 38.1     | 1.564235468 | 0.02553  | -1.526 |
| 100594_at   | 800.3   | 761.6   | 865.2   | 773.9  | 576.3   | 729.9   | 688.6   | 714.1  | 0.03020343  | 800.25    | 677.225  | 123.025  | 1.181660453 | 0.03135  | -1.185 |
| 100595_at   | 2895.4  | 2539.8  | 2897.8  | 3023.5 | 1894.9  | 2871.9  | 2645.2  | 2735.7 | 0.276449849 | 2839.125  | 2536.925 | 302.2    | 1.119120589 | 0.2723   | -1.131 |
| 100596_at   | 750     | 722.8   | 799.9   | 642.1  | 837.3   | 651.3   | 778.9   | 698.8  | 0.816237745 | 728.7     | 741.575  | 12.875   | 0.982638304 | 0.8328   | -1.016 |
| 100597_at   | 253.7   | 228.5   | 269     | 276.6  | 165.6   | 281.2   | 163.6   | 276.7  | 0.373583688 | 256.95    | 221.775  | 35.175   | 1.158606696 | 0.3009   | -1.196 |
| 100599_at   | 1497.8  | 1770.1  | 1821.5  | 1466.1 | 1802.3  | 1844.9  | 1923.3  | 1383.4 | 0.537425709 | 1638.875  | 1738.475 | 99.6     | 0.942708408 | 0.5726   | -1.057 |
| 100600_at   | 1959.4  | 1316.6  | 1486.7  | 1275.8 | 1600.9  | 1567.5  | 1585.4  | 1922.3 | 0.41514411  | 1509.625  | 1669.025 | 159.4    | 0.904495139 | 0.3454   | 1.118  |
| 100601_at   | 1135.8  | 1464.8  | 1289.2  | 1521.8 | 2278.2  | 1796.3  | 2268.4  | 1555.3 | 0.031844392 | 1352.9    | 1974.55  | 621.65   | 0.685168773 | 0.01766  | 1.45   |
| 100602_at   | 26.5    | 20.8    | 8.5     | 16.8   | 8.5     | 17.9    | 28.8    | 29.1   | 0.655764772 | 18.15     | 21.075   | 2.925    | 0.861209964 | 0.7623   | 1.127  |
| 100603_at   | 1055.6  | 782.5   | 792.3   | 726.6  | 658.1   | 866.6   | 759.1   | 645.9  | 0.283890951 | 839.25    | 732.425  | 106.825  | 1.145851111 | 0.2617   | -1.142 |
| 100605_at   | 235.2   | 257     | 305.4   | 312.8  | 292.3   | 248.9   | 321.3   | 257.6  | 0.926222809 | 277.6     | 280.025  | 2.425    | 0.991340059 | 0.9117   | -1.011 |
| 100606_at   | 1567.6  | 1872.7  | 1792.3  | 1372.3 | 1687.9  | 3083    | 1936.5  | 1837.4 | 0.23065747  | 1651.225  | 2136.2   | 484.975  | 0.772973036 | 0.1731   | 1.265  |
| 100607_at   | 1196.1  | 982.8   | 922.8   | 850.1  | 1067.4  | 1341.4  | 1289.1  | 1263.4 | 0.040211575 | 987.95    | 1240.325 | 252.375  | 0.796525104 | 0.0396   | 1.261  |
| 100608_at   | 1233    | 939.8   | 1148.2  | 1160.6 | 895.7   | 1141.8  | 1105.8  | 1229.4 | 0.783675129 | 1120.4    | 1093.175 | 27.225   | 1.024904521 | 0.7804   | -1.027 |
| 100609_at   | 24.9    | 9.3     | 24.1    | 13.6   | 22.8    | 16.2    | 29.7    | 48.9   | 0.219275566 | 17.975    | 29.4     | 11.425   | 0.611394558 | 0.1922   | 1.631  |
| 100610_at   | 3340.6  | 3157.2  | 3786.9  | 2907.9 | 2361.4  | 2923.2  | 2823.1  | 3343.9 | 0.163618141 | 3298.15   | 2862.9   | 435.25   | 1.152031157 | 0.162    | -1.155 |
| 100611_at   | 305.5   | 230.8   | 267.1   | 555.1  | 401.8   | 384.3   | 257     | 219.1  | 0.791664899 | 339.625   | 315.55   | 24.075   | 1.076295357 | 0.8566   | -1.047 |
| 100612_at   | 2617.9  | 1960.6  | 2389.6  | 2140.2 | 1351    | 1623.3  | 1716.9  | 1507.1 | 0.007998522 | 2277.075  | 1549.575 | 727.5    | 1.469483568 | 0.003366 | -1.467 |
| 100613_at   | 1778.4  | 1991.7  | 1973.7  | 2220.7 | 2429.5  | 1905.6  | 1826.3  | 2444.5 | 0.437223836 | 1991.125  | 2151.475 | 160.35   | 0.925469736 | 0.4568   | -1.074 |
| 100614_at   | 42.1    | 38.8    | 32.4    | 43.4   | 22.1    | 35.5    | 17.5    | 57.5   | 0.557672898 | 39.175    | 33.15    | 6.025    | 1.181749623 | 0.3632   | -1.308 |
| 100615_at   | 5       | 8.8     | 9.1     | 20.3   | 9.3     | 41.2    | 16.6    | 7.4    | 0.406444803 | 10.8      | 18.625   | 7.825    | 0.579865772 | 0.3979   | 1.547  |
| 100616_at   | 453.4   | 483.2   | 425.8   | 429.8  | 328.9   | 363     | 312.4   | 312.6  | 0.00056805  | 448.05    | 329.225  | 118.825  | 1.360923381 | 0.000516 | -1.362 |
| 100617_at   | 50.5    | 45.2    | 56.4    | 24.1   | 47.2    | 31.3    | 44.1    | 51.9   | 0.961132182 | 44.05     | 43.625   | 0.425    | 1.00974212  | 0.9217   | -1.023 |
| 100618_f_at | 2052.8  | 1097.9  | 1406.5  | 1435.4 | 1494.7  | 1576.7  | 1344.6  | 1351.4 | 0.801853645 | 1498.15   | 1441.85  | 56.3     | 1.039047058 | 0.914    | -1.015 |
| 100619_r_at | 230.3   | 220.5   | 241.4   | 362.6  | 335.9   | 281.8   | 270.8   | 278.1  | 0.484260544 | 263.7     | 291.65   | 27.95    | 0.904165952 | 0.3803   | 1.125  |
| 100620_at   | 77.2    | 34.6    | 61.9    | 61.5   | 59.1    | 26.5    | 33.9    | 53.6   | 0.236646861 | 58.8      | 43.275   | 15.525   | 1.358752166 | 0.2591   | -1.375 |
| 100621_at   | 1627.1  | 1668    | 1795.9  | 1529   | 2451    | 1623.2  | 1966.8  | 1738.7 | 0.213204738 | 1655      | 1944.925 | 289.925  | 0.850932555 | 0.1696   | 1.162  |
| 100622_at   | 1789.8  | 1507.8  | 1569.7  | 1811.6 | 1442.1  | 1623.2  | 1607.2  | 1699.9 | 0.449549137 | 1669.725  | 1593.1   | 76.625   | 1.048098048 | 0.461    | -1.047 |
| 100623_at   | 28.9    | 50.3    | 37.8    | 46.2   | 25.5    | 31.7    | 11.5    | 19.5   | 0.026715897 | 40.8      | 22.05    | 18.75    | 1.850340136 | 0.03945  | -1.933 |
| 100626_at   | 74.4    | 25.5    | 99.4    | 84.8   | 77.5    | 112.5   | 74.8    | 132    | 0.233230556 | 71.025    | 99.2     | 28.175   | 0.715977823 | 0.2609   | 1.523  |
| 100628_at   | 4502.3  | 3907.1  | 3965.9  | 3772.3 | 4946.5  | 3613.7  | 4183    | 3588   | 0.903332286 | 4036.9    | 4082.8   | 45.9     | 0.988757715 | 0.9569   | -1.005 |
| 100629_at   | 2287.9  | 1873.7  | 2033.3  | 2018.1 | 2052.8  | 1976.7  | 2086.2  | 1742.2 | 0.47293308  | 2053.25   | 1964.475 | 88.775   | 1.045190191 | 0.4762   | -1.045 |



|             |         |         |         |         |         |         |         |         |             |           |           |          |             |          |        |
|-------------|---------|---------|---------|---------|---------|---------|---------|---------|-------------|-----------|-----------|----------|-------------|----------|--------|
| 100630_f_at | 5473.7  | 4731.9  | 5287.7  | 5009.6  | 5752.7  | 4712.9  | 5246.8  | 5159.9  | 0.742860032 | 5125.725  | 5218.075  | 92.35    | 0.982301903 | 0.7559   | -1.017 |
| 100631_r_at | 110.5   | 204.8   | 342.1   | 149.1   | 227.2   | 98.6    | 250.2   | 238.6   | 0.975033404 | 201.625   | 203.65    | 2.025    | 0.990056469 | 0.915    | -1.037 |
| 100632_at   | 339.4   | 405.5   | 346.7   | 348.7   | 423.3   | 393.9   | 378.2   | 444.3   | 0.057496429 | 360.075   | 409.925   | 49.85    | 0.878392389 | 0.05417  | 1.139  |
| 100633_at   | 3141.6  | 2346.8  | 2601.8  | 2527.6  | 2366.1  | 3020.6  | 2501    | 2636.1  | 0.919152188 | 2654.45   | 2630.95   | 23.5     | 1.008932135 | 0.9325   | -1.007 |
| 100634_at   | 75.3    | 43.4    | 19.9    | 118.5   | 88.4    | 73.4    | 57.6    | 64      | 0.785021448 | 64.275    | 70.85     | 6.575    | 0.907198306 | 0.501    | 1.327  |
| 100635_at   | 4890.2  | 4183.3  | 5164.6  | 4078.7  | 3660.3  | 4670.9  | 4536.9  | 4538.7  | 0.543574584 | 4579.2    | 4351.7    | 227.5    | 1.05227842  | 0.5552   | -1.052 |
| 100636_at   | 911.9   | 779.4   | 644.2   | 960.3   | 981.2   | 728.7   | 1122.8  | 968.1   | 0.288781197 | 823.95    | 950.2     | 126.25   | 0.867133235 | 0.3078   | 1.153  |
| 100669_at   | 4       | 16.9    | 11.8    | 4.8     | 11.9    | 13      | 7.1     | 16.9    | 0.470670334 | 9.375     | 12.225    | 2.85     | 0.766871166 | 0.3559   | 1.48   |
| 100670_at   | 13.3    | 8.6     | 2.9     | 8.4     | 4.6     | 5.4     | 5       | 8       | 0.325981993 | 8.3       | 5.75      | 2.55     | 1.443478261 | 0.4903   | -1.292 |
| 100671_at   | 2.8     | 17.6    | 9.9     | 9.4     | 2.1     | 7.5     | 5.7     | 8       | 0.281106568 | 9.925     | 5.825     | 4.1      | 1.703862661 | 0.3789   | -1.601 |
| 100672_at   | 15.8    | 12.3    | 11.2    | 2.6     | 9.5     | 7.6     | 2.3     | 13.1    | 0.538608772 | 10.475    | 8.125     | 2.35     | 1.289230769 | 0.682    | -1.271 |
| 100673_f_at | 52.5    | 48.2    | 66.4    | 45.8    | 54.4    | 63      | 50.2    | 76.7    | 0.334431472 | 53.225    | 61.075    | 7.85     | 0.871469505 | 0.3206   | 1.144  |
| 100674_f_at | 43.5    | 32.7    | 35.5    | 44.8    | 52.9    | 36      | 48.6    | 46.5    | 0.192126648 | 39.125    | 46        | 6.875    | 0.850543478 | 0.2052   | 1.174  |
| 100675_at   | 8.4     | 7.3     | 7       | 13      | 19.3    | 47      | 41      | 21.6    | 0.040860964 | 8.925     | 32.225    | 23.3     | 0.276958883 | 0.003335 | 3.468  |
| 100676_at   | 4.5     | 8.5     | 20.6    | 16.7    | 11      | 6       | 10.6    | 8.8     | 0.424591455 | 12.575    | 9.1       | 3.475    | 1.381868132 | 0.63     | -1.209 |
| 100677_f_at | 38.7    | 12      | 18.5    | 12.2    | 9.1     | 25.6    | 68.9    | 6.8     | 0.66778147  | 20.35     | 27.6      | 7.25     | 0.737318841 | 0.9876   | -1.01  |
| 100678_s_at | 6.5     | 4       | 23.3    | 15.7    | 4.1     | 3.8     | 1.8     | 3.2     | 0.129923304 | 12.375    | 3.225     | 9.15     | 3.837209302 | 0.03799  | -3.232 |
| 100679_at   | 11.3    | 20.6    | 10.5    | 13.6    | 12.1    | 12.2    | 11.2    | 7.7     | 0.270953444 | 14        | 10.8      | 3.2      | 1.296296296 | 0.2419   | -1.271 |
| 100680_at   | 5.3     | 1.4     | 12.7    | 15.7    | 24.4    | 7.1     | 4.4     | 4       | 0.845578774 | 8.775     | 9.975     | 1.2      | 0.879699248 | 0.7939   | 1.208  |
| 100681_f_at | 39      | 11.7    | 9.1     | 8.8     | 38.4    | 41.7    | 19.3    | 42.4    | 0.095511076 | 17.15     | 35.45     | 18.3     | 0.483779972 | 0.06629  | 2.45   |
| 100682_f_at | 51.6    | 53.4    | 51.1    | 53      | 52.9    | 69.9    | 68.3    | 55.9    | 0.11387734  | 52.275    | 61.75     | 9.475    | 0.846558704 | 0.06601  | 1.173  |
| 100683_r_at | 119.4   | 104.1   | 143.1   | 128.3   | 229     | 146.8   | 170.4   | 83.3    | 0.350900266 | 123.725   | 157.375   | 33.65    | 0.786179508 | 0.4392   | 1.202  |
| 100684_at   | 1676.5  | 1713.1  | 1682.4  | 1648.9  | 2007.7  | 1790.7  | 1670.9  | 1801.8  | 0.142502666 | 1680.225  | 1817.775  | 137.55   | 0.924330569 | 0.09521  | -1.08  |
| 100685_at   | 79.3    | 51.9    | 85.7    | 87.5    | 119.4   | 46.4    | 94.7    | 103     | 0.446186107 | 76.1      | 90.875    | 14.775   | 0.83741403  | 0.5864   | 1.15   |
| 100686_at   | 16132.3 | 18601.5 | 17125.4 | 13875.8 | 27503.1 | 14772.9 | 20606.9 | 15401.7 | 0.375129392 | 16433.75  | 19571.15  | 3137.4   | 0.839692609 | 0.3826   | 1.16   |
| 100687_f_at | 18.6    | 23      | 11.5    | 17      | 13.5    | 11.6    | 31.8    | 23.2    | 0.656018995 | 17.525    | 20.025    | 2.5      | 0.875156055 | 0.7786   | -1.085 |
| 100688_at   | 8.2     | 10.5    | 11.4    | 10.7    | 18.2    | 10.5    | 10.6    | 6.8     | 0.626961082 | 10.2      | 11.525    | 1.325    | 0.885032538 | 0.7622   | -1.07  |
| 100689_at   | 2.2     | 1.5     | 3.8     | 2.8     | 1.5     | 1.6     | 3       | 6       | 0.71601467  | 2.575     | 3.025     | 0.45     | 0.851239669 | 0.9087   | -1.047 |
| 100690_at   | 66.6    | 82.5    | 88.5    | 114.8   | 88.9    | 95.8    | 112.8   | 85.5    | 0.543203121 | 88.1      | 95.75     | 7.65     | 0.920104439 | 0.4786   | -1.101 |
| 100691_at   | 2.9     | 1.3     | 5       | 17.8    | 30.3    | 14.3    | 4.7     | 3.9     | 0.404876217 | 6.75      | 13.3      | 6.55     | 0.507518797 | 0.3237   | 2.191  |
| 100692_at   | 20.3    | 30.6    | 34.9    | 55.6    | 85.3    | 39.6    | 118.7   | 31.6    | 0.202396264 | 35.35     | 68.8      | 33.45    | 0.51380814  | 0.1682   | 1.8    |
| 100693_at   | 55.2    | 60.2    | 69.7    | 45.6    | 65.9    | 42.1    | 45.8    | 77.5    | 0.988363477 | 57.675    | 57.825    | 0.15     | 0.997405966 | 0.9198   | -1.018 |
| 100694_at   | 19819.4 | 19582.8 | 20575.4 | 17169.2 | 27577.3 | 16930.3 | 21128.9 | 18163.9 | 0.544760712 | 19286.7   | 20950.1   | 1663.4   | 0.920601811 | 0.5819   | -1.069 |
| 100695_at   | 38.1    | 14.9    | 55.3    | 13.6    | 58.5    | 20.5    | 34.3    | 16      | 0.898011873 | 30.475    | 32.325    | 1.85     | 0.942768755 | 0.8175   | 1.115  |
| 100696_at   | 81.3    | 56.9    | 110.6   | 93.2    | 37.8    | 104.3   | 85      | 119.8   | 0.955845547 | 85.5      | 86.725    | 1.225    | 0.985874892 | 0.8886   | -1.044 |
| 100697_at   | 8.9     | 14.8    | 18.4    | 49.4    | 61.5    | 32.9    | 54      | 73      | 0.039602572 | 22.875    | 55.35     | 32.475   | 0.413279133 | 0.03864  | 2.854  |
| 100698_at   | 8.7     | 9.8     | 6       | 6.1     | 5.9     | 10.1    | 16.8    | 7.4     | 0.408108713 | 7.65      | 10.05     | 2.4      | 0.76119403  | 0.4391   | 1.238  |
| 100699_at   | 5.7     | 4       | 10.9    | 6.6     | 5.4     | 6.4     | 6.1     | 6.6     | 0.68004856  | 6.8       | 6.125     | 0.675    | 1.110204082 | 0.8671   | -1.037 |
| 100700_s_at | 3085.9  | 3329.2  | 2728.9  | 2218.9  | 1628.6  | 2552.1  | 3142.1  | 2849.9  | 0.494558872 | 2840.725  | 2543.175  | 297.55   | 1.11699942  | 0.4788   | -1.137 |
| 100701_r_at | 1250.7  | 1397.6  | 1303.3  | 1097.1  | 1128.4  | 1286.3  | 1247    | 1213.8  | 0.572331859 | 1262.175  | 1218.875  | 43.3     | 1.035524562 | 0.5984   | -1.033 |
| 100702_at   | 925.8   | 951.4   | 908.6   | 970.7   | 756.8   | 551.6   | 557.6   | 622.7   | 0.004829118 | 939.125   | 622.175   | 316.95   | 1.50942259  | 0.001365 | -1.522 |
| 100703_at   | 29.1    | 10.2    | 53.2    | 38.9    | 50.7    | 43.1    | 62.3    | 41.6    | 0.170791488 | 32.85     | 49.425    | 16.575   | 0.664643399 | 0.1845   | 1.74   |
| 100704_at   | 18.6    | 11      | 8.7     | 10.5    | 8.2     | 11.1    | 5.6     | 9.6     | 0.214483283 | 12.2      | 8.625     | 3.575    | 1.414492754 | 0.1737   | -1.402 |
| 100705_at   | 64.9    | 36.4    | 61.1    | 39.8    | 36.8    | 54.6    | 54.6    | 67.2    | 0.783983163 | 50.55     | 53.3      | 2.75     | 0.948405253 | 0.7561   | -1.065 |
| 100706_f_at | 308.5   | 375     | 352.9   | 394.6   | 264.6   | 325.2   | 392.2   | 414.4   | 0.832488518 | 357.75    | 349.1     | 8.65     | 1.024778001 | 0.7682   | -1.036 |
| 100707_at   | 102.3   | 94.1    | 80.4    | 106.4   | 87      | 134.4   | 80.3    | 118.9   | 0.542367218 | 95.8      | 105.15    | 9.35     | 0.91107941  | 0.6015   | -1.079 |
| 100708_at   | 12146.1 | 13246.7 | 13963.8 | 12494.2 | 17113.8 | 12179.7 | 14500.2 | 13342.2 | 0.309532678 | 12962.7   | 14283.975 | 1321.275 | 0.907499488 | 0.2935   | -1.095 |
| 100709_at   | 20.4    | 24.4    | 101.6   | 38      | 33.3    | 20.3    | 10.1    | 50.3    | 0.442424377 | 46.1      | 28.5      | 17.6     | 1.61754386  | 0.4209   | -1.538 |
| 100710_at   | 3361.8  | 3194.2  | 3067.6  | 3070.3  | 3486    | 3145.3  | 3492.5  | 3555.4  | 0.081374046 | 3173.475  | 3419.8    | 246.325  | 0.927970934 | 0.07967  | -1.077 |
| 100711_at   | 13147.7 | 14818.2 | 12822.3 | 11486.1 | 23901.8 | 11367.7 | 14611.6 | 14432.5 | 0.352625419 | 13068.575 | 16078.4   | 3009.825 | 0.812803202 | 0.3339   | 1.189  |
| 100712_at   | 46.5    | 14.6    | 87.1    | 74      | 73.4    | 77.7    | 76.1    | 61.3    | 0.382173357 | 55.55     | 72.125    | 16.575   | 0.770190641 | 0.3098   | 1.57   |
| 100713_at   | 279.2   | 275.1   | 278.3   | 354.2   | 264.4   | 275.2   | 214.2   | 346.8   | 0.545233588 | 296.7     | 275.15    | 21.55    | 1.078320916 | 0.4952   | -1.088 |
| 100714_at   | 26      | 17.6    | 56.1    | 62.3    | 20.6    | 18      | 17      | 17.8    | 0.137376511 | 40.5      | 18.35     | 22.15    | 2.207084469 | 0.0743   | -1.943 |
| 100715_at   | 2       | 4.2     | 3.2     | 3.4     | 3.9     | 2.9     | 5       | 14.5    | 0.297712078 | 3.2       | 6.575     | 3.375    | 0.486692015 | 0.1992   | 1.748  |
| 100716_at   | 72.6    | 26      | 59.5    | 57      | 68.7    | 27.1    | 53.1    | 76.9    | 0.862100732 | 53.775    | 56.45     | 2.675    | 0.952612932 | 0.9      | -1.044 |
| 100717_at   | 314.3   | 294.3   | 395.4   | 366.7   | 345.4   | 329.8   | 361.4   | 382.1   | 0.664680191 | 342.675   | 354.675   | 12       | 0.966166209 | 0.6138   | -1.041 |



|             |         |         |         |         |         |         |         |         |             |           |           |          |             |         |        |
|-------------|---------|---------|---------|---------|---------|---------|---------|---------|-------------|-----------|-----------|----------|-------------|---------|--------|
| 100718_at   | 10107.4 | 10660.1 | 9236    | 10273.8 | 15434.9 | 9608    | 10954.8 | 11778.6 | 0.230776603 | 10069.325 | 11944.075 | 1874.75  | 0.843039331 | 0.1842  | 1.17   |
| 100719_f_at | 11.6    | 10.2    | 7.2     | 11.2    | 9.6     | 8       | 8.9     | 28      | 0.514979512 | 10.05     | 13.625    | 3.575    | 0.737614679 | 0.5968  | 1.191  |
| 100720_at   | 4700.1  | 7637.7  | 5398.6  | 5955.8  | 5417.5  | 5521.3  | 5184.2  | 4827.3  | 0.358373126 | 5923.05   | 5237.575  | 685.475  | 1.130876407 | 0.349   | -1.114 |
| 100721_f_at | 49.9    | 11.6    | 49.1    | 44.9    | 84.8    | 10.3    | 32.9    | 39      | 0.880253635 | 38.875    | 41.75     | 2.875    | 0.931137725 | 0.9539  | -1.034 |
| 100722_r_at | 54      | 27.4    | 29.6    | 91      | 25.1    | 68.7    | 58.2    | 28.9    | 0.783610741 | 50.5      | 45.225    | 5.275    | 1.116639027 | 0.8397  | -1.083 |
| 100723_f_at | 810.2   | 886.6   | 1137.2  | 986.5   | 1206.2  | 1020.1  | 1141.4  | 1010.8  | 0.159470066 | 955.125   | 1094.625  | 139.5    | 0.872559096 | 0.1461  | 1.152  |
| 100724_at   | 67.5    | 50.7    | 74.7    | 35.8    | 54.7    | 69.9    | 70.2    | 79.3    | 0.313839555 | 57.175    | 68.525    | 11.35    | 0.834367019 | 0.2903  | 1.235  |
| 100725_at   | 30.4    | 38.1    | 21.4    | 34.3    | 38.1    | 37.4    | 23.3    | 44      | 0.444344391 | 31.05     | 35.7      | 4.65     | 0.869747899 | 0.494   | 1.145  |
| 100726_at   | 12.3    | 29      | 47.4    | 13.6    | 30.3    | 20.8    | 13.5    | 20.1    | 0.646861716 | 25.575    | 21.175    | 4.4      | 1.207792208 | 0.8405  | -1.079 |
| 100727_at   | 14182.6 | 16523.7 | 14874.9 | 12207   | 28516.9 | 12451.9 | 17294.1 | 13374.2 | 0.422417433 | 14447.05  | 17909.275 | 3462.225 | 0.806679779 | 0.4379  | 1.179  |
| 100728_at   | 120.6   | 143.7   | 180.2   | 119.3   | 94.7    | 166.9   | 139.6   | 115.6   | 0.597680184 | 140.95    | 129.2     | 11.75    | 1.090944272 | 0.5647  | -1.099 |
| 100729_at   | 13759.6 | 12623.8 | 10673.6 | 10914.1 | 18867.6 | 11628.2 | 11669.7 | 11733.5 | 0.488021138 | 11992.775 | 13474.75  | 1481.975 | 0.890018368 | 0.4899  | -1.104 |
| 100730_at   | 35.1    | 26.8    | 50.8    | 55.3    | 51.8    | 26.1    | 44.4    | 19.2    | 0.537855271 | 42        | 35.375    | 6.625    | 1.187279152 | 0.4957  | -1.23  |
| 100731_at   | 10.6    | 11      | 12.8    | 22.9    | 14.9    | 9.4     | 13.3    | 17.7    | 0.888178421 | 14.325    | 13.825    | 0.5      | 1.036166365 | 0.9796  | -1.006 |
| 100732_at   | 16353.9 | 15413.8 | 12505.1 | 14831.2 | 20636   | 12996.4 | 14181.1 | 15269.5 | 0.621792076 | 14776     | 15770.75  | 994.75   | 0.936924369 | 0.6562  | -1.056 |
| 100733_at   | 6536.2  | 5465.6  | 6329.6  | 4650.9  | 5700.8  | 5697.4  | 5762.7  | 4694    | 0.599936804 | 5745.575  | 5463.725  | 281.85   | 1.051585686 | 0.6433  | -1.046 |
| 100734_at   | 15345.8 | 15305.9 | 15281.7 | 14117.4 | 20383.8 | 13838.2 | 16206.8 | 14352.4 | 0.488233514 | 15012.7   | 16195.3   | 1182.6   | 0.926978815 | 0.4987  | -1.067 |
| 100735_at   | 6.7     | 15.1    | 3.2     | 3.6     | 7.1     | 8       | 25      | 14.6    | 0.243622788 | 7.15      | 13.675    | 6.525    | 0.52285192  | 0.1669  | 2.059  |
| 100736_at   | 13.8    | 42.1    | 15.2    | 59.5    | 21.3    | 7.4     | 14.6    | 33.2    | 0.329946521 | 32.65     | 19.125    | 13.525   | 1.707189542 | 0.3555  | -1.623 |
| 100737_at   | 54      | 51.5    | 57.2    | 43.8    | 97.6    | 47.3    | 73.8    | 47.4    | 0.308610846 | 51.625    | 66.525    | 14.9     | 0.776024051 | 0.3034  | 1.234  |
| 100738_at   | 21.1    | 16.5    | 39.4    | 31.5    | 19.6    | 29.4    | 19.3    | 24.1    | 0.515411436 | 27.125    | 23.1      | 4.025    | 1.174242424 | 0.6076  | -1.126 |
| 100739_at   | 31.5    | 29.4    | 38.1    | 31.9    | 5.5     | 19.8    | 19.8    | 11.5    | 0.006613947 | 32.725    | 14.15     | 18.575   | 2.312720848 | 0.02112 | -2.59  |
| 100740_at   | 13      | 10.7    | 12.3    | 15.7    | 15      | 14.4    | 14.9    | 9       | 0.830758763 | 12.925    | 13.325    | 0.4      | 0.969981238 | 0.9094  | -1.018 |
| 100741_at   | 12.1    | 14.3    | 18      | 12.1    | 31.8    | 43.9    | 43.1    | 10.9    | 0.095659819 | 14.125    | 32.425    | 18.3     | 0.435620663 | 0.08152 | 2.044  |
| 100742_at   | 207.4   | 184.3   | 264.2   | 326.7   | 182.8   | 236.5   | 222.7   | 365.1   | 0.90791869  | 245.65    | 251.775   | 6.125    | 0.975672724 | 0.9373  | -1.016 |
| 100743_at   | 191.6   | 168.8   | 148.2   | 160.2   | 120.4   | 164.8   | 133     | 85.5    | 0.082718929 | 167.2     | 125.925   | 41.275   | 1.327774469 | 0.08262 | -1.358 |
| 100744_at   | 13.1    | 29      | 20.2    | 10.3    | 15.5    | 12      | 47.3    | 63.1    | 0.2862039   | 18.15     | 34.475    | 16.325   | 0.526468455 | 0.3379  | 1.629  |
| 100745_r_at | 2.9     | 6.9     | 2.8     | 2.7     | 8.6     | 7.1     | 3.9     | 0.4     | 0.599394795 | 3.825     | 5         | 1.175    | 0.765       | 0.8855  | -1.116 |
| 100746_at   | 18.4    | 33.1    | 16.2    | 45.1    | 30.6    | 68.5    | 29.3    | 53.7    | 0.192847334 | 28.2      | 45.525    | 17.325   | 0.619439868 | 0.168   | 1.652  |
| 100747_at   | 16      | 28.4    | 66.9    | 49.6    | 9.1     | 20.7    | 34.3    | 29.4    | 0.245287475 | 40.225    | 23.375    | 16.85    | 1.720855615 | 0.2777  | -1.676 |
| 100748_at   | 26.9    | 28.9    | 5.4     | 5       | 4.8     | 4.2     | 4       | 28.5    | 0.515024656 | 16.55     | 10.375    | 6.175    | 1.595180723 | 0.4475  | -1.736 |
| 100749_at   | 102.3   | 121.3   | 132.5   | 139.9   | 107.2   | 94.4    | 99.3    | 107.9   | 0.069697808 | 124       | 102.2     | 21.8     | 1.213307241 | 0.04693 | -1.207 |
| 100750_at   | 47.3    | 27.4    | 60      | 58.9    | 41.3    | 39      | 45.3    | 35      | 0.361575391 | 48.4      | 40.15     | 8.25     | 1.205479452 | 0.4732  | -1.157 |
| 100751_at   | 334     | 495.6   | 446.4   | 450.3   | 282.7   | 451.1   | 304     | 320.7   | 0.123260251 | 431.575   | 339.625   | 91.95    | 1.270739787 | 0.1165  | -1.279 |
| 100752_at   | 50.8    | 12.5    | 55.8    | 70.8    | 16      | 16.6    | 69      | 64.5    | 0.766862599 | 47.475    | 41.525    | 5.95     | 1.143287176 | 0.7523  | -1.205 |
| 100753_at   | 6203    | 6712.2  | 6763.6  | 7351.5  | 7253.8  | 6707    | 7512    | 7099.5  | 0.235477226 | 6757.575  | 7143.075  | 385.5    | 0.946031646 | 0.2284  | -1.058 |
| 100754_at   | 44.5    | 11.3    | 5       | 7.4     | 16.5    | 5.9     | 7.1     | 49.6    | 0.849822459 | 17.05     | 19.775    | 2.725    | 0.862199747 | 0.8246  | 1.17   |
| 100755_at   | 130.8   | 170.7   | 104.5   | 107.5   | 155     | 101.4   | 147.2   | 123.7   | 0.865757175 | 128.375   | 131.825   | 3.45     | 0.97382894  | 0.8309  | -1.034 |
| 100756_r_at | 416.2   | 141.1   | 306.6   | 265.2   | 325.9   | 421.9   | 367     | 410     | 0.181948279 | 282.275   | 381.2     | 98.925   | 0.740490556 | 0.1701  | 1.443  |
| 100757_at   | 214.6   | 316.6   | 284.2   | 246.4   | 203.3   | 315.6   | 221.3   | 301.5   | 0.893423725 | 265.45    | 260.425   | 5.025    | 1.019295383 | 0.8554  | -1.027 |
| 100758_at   | 17174   | 18319.6 | 18525.9 | 14345.2 | 31947.6 | 15314   | 20876.9 | 17643.7 | 0.32647863  | 17091.175 | 21445.55  | 4354.375 | 0.796956711 | 0.3017  | 1.212  |
| 100759_at   | 25.4    | 157     | 106.9   | 133.7   | 191.1   | 188.8   | 72.4    | 134.6   | 0.346072382 | 105.75    | 146.725   | 40.975   | 0.720736071 | 0.3758  | 1.576  |
| 100760_at   | 4.4     | 32.8    | 45.9    | 30.8    | 61.4    | 8.1     | 11.9    | 35.8    | 0.958366183 | 28.475    | 29.3      | 0.825    | 0.971843003 | 0.9887  | -1.011 |
| 100761_at   | 27.5    | 50.2    | 49.3    | 45.7    | 12.3    | 92.7    | 41.9    | 50.1    | 0.746848966 | 43.175    | 49.25     | 6.075    | 0.876649746 | 0.8866  | -1.069 |
| 100762_at   | 12.5    | 21.3    | 17.4    | 15.7    | 25.3    | 22.1    | 28.6    | 22.4    | 0.017021067 | 16.725    | 24.6      | 7.875    | 0.679878049 | 0.0199  | 1.489  |
| 100763_at   | 18.3    | 19.8    | 15.5    | 8.3     | 10.5    | 27.7    | 22.4    | 18.5    | 0.373247684 | 15.475    | 19.775    | 4.3      | 0.782553729 | 0.4436  | 1.265  |
| 100764_at   | 14.7    | 23.9    | 64      | 112.1   | 109.8   | 54.8    | 60.7    | 76.6    | 0.432673622 | 53.675    | 75.475    | 21.8     | 0.711162637 | 0.2621  | 1.826  |
| 100765_at   | 23.6    | 12.5    | 25      | 32.4    | 28.5    | 28.8    | 31.7    | 25.9    | 0.287927699 | 23.375    | 28.725    | 5.35     | 0.813751088 | 0.2561  | 1.295  |
| 100766_at   | 35.4    | 71      | 80.8    | 29.3    | 24.2    | 65.3    | 72.5    | 66.3    | 0.867424137 | 54.125    | 57.075    | 2.95     | 0.948313622 | 0.8696  | -1.064 |
| 100767_at   | 3.3     | 3.2     | 5.4     | 4.2     | 4.3     | 13.3    | 11.2    | 4.6     | 0.154512318 | 4.025     | 8.35      | 4.325    | 0.482035928 | 0.09515 | 1.872  |
| 100768_at   | 21.6    | 3.5     | 25.8    | 33.4    | 4.1     | 7.4     | 8.1     | 5.8     | 0.101887816 | 21.075    | 6.35      | 14.725   | 3.318897638 | 0.1252  | -2.603 |
| 100769_at   | 69.3    | 64.4    | 75      | 84.3    | 54.9    | 88      | 57.6    | 109     | 0.778581164 | 73.25     | 77.375    | 4.125    | 0.946688207 | 0.9229  | -1.018 |
| 100771_at   | 94.8    | 49.8    | 89.3    | 59.5    | 108.4   | 105.8   | 143.1   | 111.6   | 0.022025797 | 73.35     | 117.225   | 43.875   | 0.62571977  | 0.02726 | 1.643  |
| 100772_g_at | 38.7    | 50.8    | 41.9    | 48.8    | 73.6    | 79.3    | 103.8   | 121.2   | 0.017574448 | 45.05     | 94.475    | 49.425   | 0.476845726 | 0.00156 | 2.067  |
| 100773_at   | 5.4     | 7.1     | 7.7     | 6.9     | 6.9     | 8.3     | 9.5     | 8.9     | 0.071511441 | 6.775     | 8.4       | 1.625    | 0.806547619 | 0.07679 | 1.244  |
| 100774_at   | 47      | 71.7    | 64.7    | 77.5    | 85.6    | 78      | 97.3    | 121.9   | 0.0445605   | 65.225    | 95.7      | 30.475   | 0.681556949 | 0.03857 | 1.471  |



|             |         |         |         |         |         |         |         |        |             |           |          |          |             |         |        |
|-------------|---------|---------|---------|---------|---------|---------|---------|--------|-------------|-----------|----------|----------|-------------|---------|--------|
| 100775_at   | 90.1    | 116.5   | 146     | 160.4   | 168.7   | 172.5   | 133.2   | 253    | 0.131599485 | 128.25    | 181.85   | 53.6     | 0.705251581 | 0.1106  | 1.413  |
| 100776_at   | 22.6    | 35.9    | 55.7    | 36.3    | 12.3    | 52      | 11.4    | 40.6   | 0.515980506 | 37.625    | 29.075   | 8.55     | 1.294067068 | 0.3631  | -1.535 |
| 100778_at   | 55.8    | 78.5    | 33.8    | 43.1    | 13.1    | 46.1    | 38.7    | 40.8   | 0.190121029 | 52.8      | 34.675   | 18.125   | 1.522710887 | 0.2156  | -1.609 |
| 100779_at   | 13.7    | 8.3     | 32.9    | 25.4    | 66      | 19.8    | 27.7    | 17.4   | 0.367810597 | 20.075    | 32.725   | 12.65    | 0.613445378 | 0.3154  | 1.603  |
| 100780_at   | 17578.6 | 17877.3 | 17635.6 | 16322.2 | 26298.1 | 15148.8 | 19691.3 | 18203  | 0.370465739 | 17353.425 | 19835.3  | 2481.875 | 0.874875853 | 0.3654  | -1.121 |
| 100828_at   | 272.7   | 256.5   | 292.4   | 314.1   | 256     | 217.8   | 227.5   | 348.2  | 0.540237002 | 283.925   | 262.375  | 21.55    | 1.08213435  | 0.4451  | -1.098 |
| 100839_at   | 19.8    | 15.7    | 27.1    | 18.7    | 27.3    | 20.4    | 28.6    | 43.5   | 0.144465783 | 20.325    | 29.95    | 9.625    | 0.678631052 | 0.1037  | 1.447  |
| 100876_at   | 489.3   | 465.2   | 401.5   | 582.4   | 538     | 478.8   | 565.9   | 494.6  | 0.454012756 | 484.6     | 519.325  | 34.725   | 0.933134357 | 0.4109  | -1.079 |
| 100877_at   | 2799.7  | 2592.4  | 2262.9  | 2647.6  | 2160.7  | 2748.5  | 2165.3  | 2730   | 0.561657807 | 2575.65   | 2451.125 | 124.525  | 1.050803203 | 0.5372  | -1.055 |
| 100878_at   | 1618.4  | 1489.2  | 1420.7  | 1505.5  | 1545.1  | 1305.9  | 1439    | 1573.6 | 0.585227534 | 1508.45   | 1465.9   | 42.55    | 1.029026537 | 0.5691  | -1.031 |
| 100879_at   | 149.7   | 196.8   | 169.5   | 111.8   | 271.3   | 168.5   | 184.1   | 342.3  | 0.126344255 | 156.95    | 241.55   | 84.6     | 0.649761954 | 0.09238 | 1.507  |
| 100880_at   | 265.1   | 165.8   | 195.1   | 331.6   | 189.3   | 247.3   | 264.6   | 274.9  | 0.916587564 | 239.4     | 244.025  | 4.625    | 0.981047024 | 0.8074  | -1.046 |
| 100882_at   | 10.6    | 28.4    | 29.3    | 5.9     | 17.5    | 25.8    | 10.1    | 21.8   | 0.972582405 | 18.55     | 18.8     | 0.25     | 0.986702128 | 0.7256  | 1.176  |
| 100883_at   | 22.4    | 32.8    | 30.5    | 50      | 26.1    | 25.1    | 26.9    | 62.6   | 0.912575617 | 33.925    | 35.175   | 1.25     | 0.964463397 | 0.9914  | -1.003 |
| 100884_at   | 4633.9  | 3913    | 3931.1  | 3974    | 4225.2  | 3903.2  | 4081    | 3893.3 | 0.670694892 | 4113      | 4025.675 | 87.325   | 1.021692014 | 0.6809  | -1.02  |
| 100885_at   | 628.9   | 595.4   | 642.1   | 676.5   | 457.2   | 550.7   | 545.4   | 402.2  | 0.018763192 | 635.725   | 488.875  | 146.85   | 1.300383534 | 0.01495 | -1.31  |
| 100886_f_at | 639.3   | 639.8   | 696.1   | 659.3   | 817.6   | 672.4   | 737.1   | 712.1  | 0.0832906   | 658.625   | 734.8    | 76.175   | 0.896332335 | 0.0568  | 1.113  |
| 100887_at   | 722.5   | 605.2   | 647.7   | 675.9   | 377.2   | 669.3   | 500.7   | 854.4  | 0.595335324 | 662.825   | 600.4    | 62.425   | 1.103972352 | 0.4593  | -1.154 |
| 100888_at   | 29.5    | 19.9    | 33.4    | 9.3     | 6.4     | 12.8    | 10      | 10.3   | 0.088993705 | 23.025    | 9.875    | 13.15    | 2.33164557  | 0.05343 | -2.162 |
| 100889_at   | 378.8   | 495.5   | 409.7   | 520.4   | 333     | 434.8   | 425.2   | 498.1  | 0.576325587 | 451.1     | 422.775  | 28.325   | 1.066997812 | 0.5771  | -1.069 |
| 100890_at   | 318.5   | 269.7   | 261.9   | 367.1   | 400.9   | 261.7   | 333.2   | 274.8  | 0.751153676 | 304.3     | 317.65   | 13.35    | 0.957972611 | 0.7727  | -1.039 |
| 100891_at   | 11.4    | 17.7    | 23.2    | 51.4    | 29.3    | 11.7    | 46.5    | 47.5   | 0.5457312   | 25.925    | 33.75    | 7.825    | 0.768148148 | 0.5516  | 1.333  |
| 100892_at   | 639.9   | 539.1   | 563.7   | 591.2   | 555.6   | 618.4   | 602.6   | 633.9  | 0.512958764 | 583.475   | 602.625  | 19.15    | 0.968222361 | 0.503   | -1.034 |
| 100893_at   | 995.3   | 790.1   | 849.6   | 892     | 835.7   | 1111.6  | 960.9   | 1211.8 | 0.179381028 | 881.75    | 1030     | 148.25   | 0.856067961 | 0.1683  | 1.161  |
| 100894_at   | 478.4   | 372.6   | 370     | 452.9   | 436.2   | 383.1   | 483.3   | 473.4  | 0.50402449  | 418.475   | 444      | 25.525   | 0.942511261 | 0.4932  | -1.064 |
| 100895_at   | 429.6   | 319.1   | 347.5   | 446.6   | 352.5   | 372.5   | 444.2   | 377.7  | 0.978858202 | 385.7     | 386.725  | 1.025    | 0.997349538 | 0.9302  | -1.009 |
| 100896_at   | 12.9    | 64.8    | 58.2    | 21      | 22.9    | 44.2    | 63.4    | 19.4   | 0.919532165 | 39.225    | 37.475   | 1.75     | 1.046697799 | 0.9208  | -1.051 |
| 100897_f_at | 63.6    | 122.8   | 71.2    | 108.4   | 112.5   | 133.8   | 124.5   | 99.5   | 0.173031735 | 91.5      | 117.575  | 26.075   | 0.778226664 | 0.1511  | 1.326  |
| 100898_r_at | 15.2    | 10.5    | 8.7     | 13.2    | 9.3     | 18.4    | 14.3    | 6.6    | 0.936874752 | 11.9      | 12.15    | 0.25     | 0.979423868 | 0.9081  | -1.032 |
| 100899_s_at | 389.6   | 796.7   | 576.7   | 557.7   | 556.2   | 625.4   | 580.9   | 483.5  | 0.844098723 | 580.175   | 561.5    | 18.675   | 1.033259127 | 0.9734  | -1.005 |
| 100900_at   | 798.1   | 1314.3  | 959.1   | 1009.1  | 1067.8  | 937.8   | 1102.1  | 1111.1 | 0.779675581 | 1020.15   | 1054.7   | 34.55    | 0.96724187  | 0.6838  | -1.048 |
| 100901_at   | 89.2    | 185     | 104     | 135.7   | 91.5    | 158.7   | 86.8    | 125.7  | 0.65326069  | 128.475   | 115.675  | 12.8     | 1.110654852 | 0.6688  | -1.101 |
| 100902_at   | 492.1   | 448.6   | 460.1   | 543.8   | 394.7   | 509.4   | 487     | 463    | 0.51558033  | 486.15    | 463.525  | 22.625   | 1.048810744 | 0.5089  | -1.051 |
| 100903_at   | 1008.5  | 1140.2  | 1101    | 1083.4  | 902.4   | 1040.8  | 1070.3  | 1014.8 | 0.151845505 | 1083.275  | 1007.075 | 76.2     | 1.075664672 | 0.1551  | -1.077 |
| 100904_at   | 467.6   | 418.7   | 405.7   | 393     | 574.5   | 423.1   | 476     | 385.1  | 0.382514839 | 421.25    | 464.675  | 43.425   | 0.906547587 | 0.3809  | 1.093  |
| 100905_at   | 449.5   | 345.4   | 425.5   | 452.9   | 318     | 454.4   | 478.8   | 380.6  | 0.823604754 | 418.325   | 407.95   | 10.375   | 1.025432038 | 0.786   | -1.032 |
| 100906_at   | 183.6   | 194.1   | 147.3   | 222.2   | 150.9   | 187.9   | 156.1   | 266    | 0.915751015 | 186.8     | 190.225  | 3.425    | 0.981995006 | 0.9892  | -1.002 |
| 100907_at   | 262.4   | 210.2   | 206.9   | 170.5   | 236.4   | 272.3   | 256.3   | 301.6  | 0.063911089 | 212.5     | 266.65   | 54.15    | 0.796924808 | 0.06103 | 1.265  |
| 100908_at   | 347.5   | 335     | 353.6   | 303.3   | 294.7   | 391.7   | 428.9   | 421.8  | 0.211525569 | 334.85    | 384.275  | 49.425   | 0.871381172 | 0.2193  | 1.137  |
| 100909_at   | 90.5    | 77.5    | 67.3    | 29.3    | 34.9    | 80.2    | 93.4    | 144.4  | 0.437426    | 66.15     | 88.225   | 22.075   | 0.749787475 | 0.5435  | 1.285  |
| 100910_at   | 580.9   | 484.1   | 372.4   | 435.7   | 461.4   | 515.6   | 611     | 439.6  | 0.53228606  | 468.275   | 506.9    | 38.625   | 0.923801539 | 0.5043  | -1.088 |
| 100911_at   | 470.2   | 796.1   | 611.2   | 629.3   | 497.1   | 613.8   | 647     | 629.1  | 0.707520454 | 626.7     | 596.75   | 29.95    | 1.050188521 | 0.7745  | -1.038 |
| 100912_at   | 264.1   | 202.4   | 250.7   | 269.2   | 184     | 225.8   | 232.6   | 296.1  | 0.682952512 | 246.6     | 234.625  | 11.975   | 1.051038892 | 0.64    | -1.06  |
| 100913_at   | 46.4    | 37.3    | 10.7    | 16.4    | 15      | 74.4    | 63.6    | 47.8   | 0.203521788 | 27.7      | 50.2     | 22.5     | 0.551792829 | 0.2735  | 1.827  |
| 100914_at   | 160.7   | 242.5   | 252.5   | 231.8   | 210.8   | 235.1   | 402.6   | 288.9  | 0.253191218 | 221.875   | 284.35   | 62.475   | 0.780288377 | 0.2365  | 1.261  |
| 100915_at   | 1671.3  | 2555    | 1811.3  | 2233.1  | 1759.9  | 2157.2  | 2295.4  | 2222.8 | 0.86771949  | 2067.675  | 2108.825 | 41.15    | 0.980486764 | 0.8098  | -1.029 |
| 100916_at   | 6.5     | 18.2    | 11      | 9.1     | 4.1     | 5.2     | 4.6     | 8.2    | 0.104704905 | 11.2      | 5.525    | 5.675    | 2.027149321 | 0.04343 | -1.957 |
| 100917_at   | 208.5   | 158.2   | 232.2   | 249     | 173.4   | 234.2   | 215.3   | 221.8  | 0.974380589 | 211.975   | 211.175  | 0.8      | 1.003788327 | 0.9734  | -1.004 |
| 100920_at   | 25.2    | 31.4    | 52.7    | 43.2    | 63.6    | 49.3    | 26.9    | 22.3   | 0.842361749 | 38.125    | 40.525   | 2.4      | 0.940777298 | 0.9703  | -1.012 |
| 100921_at   | 2622.3  | 2035.1  | 2059.6  | 1726.1  | 3544.6  | 2082.1  | 2815.2  | 2180   | 0.221269655 | 2110.775  | 2655.475 | 544.7    | 0.794876623 | 0.1983  | 1.243  |
| 100923_at   | 452.5   | 830.4   | 588.6   | 764.5   | 454.4   | 600.5   | 582.3   | 644    | 0.399427056 | 659       | 570.3    | 88.7     | 1.155532176 | 0.4543  | -1.134 |
| 100924_at   | 37.4    | 29.5    | 33.8    | 36.3    | 68      | 33.9    | 28      | 58.7   | 0.273551713 | 34.25     | 47.15    | 12.9     | 0.72640509  | 0.2862  | 1.293  |
| 100925_at   | 116.2   | 102.7   | 89.7    | 105.4   | 124.7   | 117.5   | 102     | 109.7  | 0.222772629 | 103.5     | 113.475  | 9.975    | 0.912095175 | 0.2234  | -1.098 |
| 100926_at   | 4       | 13.1    | 9.8     | 3.4     | 8.2     | 6.1     | 12.3    | 2      | 0.897910732 | 7.575     | 7.15     | 0.425    | 1.059440559 | 0.8611  | -1.099 |
| 100927_at   | 739.6   | 930.4   | 710.4   | 642.6   | 605.8   | 619.4   | 738.1   | 798.7  | 0.433597292 | 755.75    | 690.5    | 65.25    | 1.094496741 | 0.4279  | -1.092 |
| 100928_at   | 1165.3  | 1308    | 1240.2  | 1381.7  | 1835.5  | 1824    | 2030.1  | 1742.1 | 0.000370115 | 1273.8    | 1857.925 | 584.125  | 0.685603563 | 0.00024 | 1.459  |



|             |        |        |        |        |        |        |        |        |             |          |          |         |             |           |        |
|-------------|--------|--------|--------|--------|--------|--------|--------|--------|-------------|----------|----------|---------|-------------|-----------|--------|
| 100929_at   | 150.4  | 142.2  | 137.9  | 153.6  | 124    | 206.2  | 184.9  | 160    | 0.289875379 | 146.025  | 168.775  | 22.75   | 0.865205155 | 0.2996    | 1.137  |
| 100931_at   | 218.1  | 268.8  | 211    | 285.5  | 235.8  | 232    | 282.9  | 273.4  | 0.669243504 | 245.85   | 256.025  | 10.175  | 0.960257787 | 0.636     | -1.046 |
| 100932_at   | 326.7  | 485.3  | 521    | 435.1  | 435    | 521.7  | 519.9  | 516.1  | 0.294814955 | 442.025  | 498.175  | 56.15   | 0.887288603 | 0.2833    | 1.141  |
| 100933_at   | 228.8  | 329.8  | 289.7  | 241.3  | 252.5  | 323.7  | 285.3  | 310.7  | 0.492542627 | 272.4    | 293.05   | 20.65   | 0.929534209 | 0.4597    | -1.083 |
| 100935_at   | 439.7  | 360.2  | 456.7  | 379.2  | 563.5  | 417.7  | 432.4  | 460.3  | 0.195220371 | 408.95   | 468.475  | 59.525  | 0.872938791 | 0.1793    | 1.143  |
| 100938_at   | 57.4   | 24.8   | 59.4   | 69.2   | 27.6   | 49.8   | 61.4   | 45.1   | 0.595324323 | 52.7     | 45.975   | 6.725   | 1.14627515  | 0.7198    | -1.114 |
| 100939_at   | 96.6   | 86.2   | 82.2   | 119.6  | 86.1   | 112.4  | 52.9   | 95.4   | 0.556730697 | 96.15    | 86.7     | 9.45    | 1.10899654  | 0.506     | -1.138 |
| 100941_at   | 502.5  | 551.1  | 507.7  | 618.4  | 435.4  | 614.5  | 482.3  | 664.8  | 0.945996813 | 544.925  | 549.25   | 4.325   | 0.992125626 | 0.9766    | -1.003 |
| 100943_at   | 420.2  | 468.4  | 429    | 443.2  | 639.5  | 593.9  | 601.2  | 631.6  | 2.69124E-05 | 440.2    | 616.55   | 176.35  | 0.713972914 | 0.0000288 | 1.401  |
| 100944_at   | 18.4   | 25.7   | 29.2   | 40.2   | 16     | 25     | 24.9   | 60.6   | 0.779286275 | 28.375   | 31.625   | 3.25    | 0.897233202 | 0.9483    | -1.022 |
| 100946_at   | 544    | 910    | 613.8  | 765.4  | 909.6  | 774    | 939.3  | 836.3  | 0.152499534 | 708.3    | 864.8    | 156.5   | 0.819033302 | 0.1277    | 1.242  |
| 100947_at   | 111.1  | 217.3  | 174    | 213    | 175.7  | 190    | 173.2  | 234.9  | 0.630472135 | 178.85   | 193.45   | 14.6    | 0.924528302 | 0.5643    | 1.11   |
| 100948_at   | 277.3  | 415.2  | 257.7  | 350.1  | 367.7  | 311.5  | 348.6  | 377.3  | 0.537400963 | 325.075  | 351.275  | 26.2    | 0.925414561 | 0.4583    | -1.097 |
| 100949_at   | 225.7  | 281    | 215.2  | 227.1  | 307.5  | 250.9  | 277    | 271.2  | 0.084558318 | 237.25   | 276.65   | 39.4    | 0.857581782 | 0.07497   | 1.169  |
| 100951_at   | 861.9  | 1043.3 | 1057.9 | 1103.8 | 805.5  | 1151.6 | 1068.9 | 1156.3 | 0.780367089 | 1016.725 | 1045.575 | 28.85   | 0.972407527 | 0.8359    | -1.022 |
| 100952_at   | 266.5  | 411.1  | 333.2  | 403.1  | 454.8  | 330.5  | 429.4  | 426.2  | 0.242017308 | 353.475  | 410.225  | 56.75   | 0.861661283 | 0.2524    | 1.169  |
| 100953_at   | 716    | 632.9  | 641.8  | 747.8  | 522.7  | 451.4  | 647.5  | 710.9  | 0.189337835 | 684.625  | 583.125  | 101.5   | 1.174062165 | 0.1676    | -1.19  |
| 100954_at   | 482.1  | 324.9  | 339.4  | 446.9  | 306.5  | 339.6  | 323.4  | 491.4  | 0.587492943 | 398.325  | 365.225  | 33.1    | 1.090629064 | 0.5562    | -1.095 |
| 100955_at   | 467.1  | 523.8  | 501.3  | 437.3  | 734    | 527.6  | 398.1  | 432.7  | 0.633069276 | 482.375  | 523.1    | 40.725  | 0.922146817 | 0.7135    | -1.056 |
| 100956_at   | 2.2    | 3      | 9.5    | 4.8    | 6.1    | 4.7    | 5.5    | 4.4    | 0.868559219 | 4.875    | 5.175    | 0.3     | 0.942028986 | 0.5425    | 1.238  |
| 100957_at   | 1324.2 | 955.5  | 1154.9 | 1145.2 | 765.4  | 1139.7 | 1008.2 | 948.8  | 0.148530582 | 1144.95  | 965.525  | 179.425 | 1.185831542 | 0.1546    | -1.19  |
| 100958_at   | 440    | 420.3  | 476.4  | 460.8  | 299    | 418.8  | 420.8  | 441.8  | 0.19565085  | 449.375  | 395.1    | 54.275  | 1.137370286 | 0.1894    | -1.149 |
| 100959_at   | 858.1  | 648.8  | 790.8  | 773.7  | 870.1  | 755.6  | 903.6  | 841.1  | 0.219695855 | 767.85   | 842.6    | 74.75   | 0.911286494 | 0.2219    | -1.101 |
| 100960_g_at | 693.8  | 579.5  | 663.5  | 604.4  | 798.3  | 624.1  | 704.4  | 575.7  | 0.501814461 | 635.3    | 675.625  | 40.325  | 0.940314524 | 0.5199    | -1.058 |
| 100961_at   | 357.4  | 513    | 476.4  | 457.4  | 592.2  | 451.6  | 570.7  | 480.9  | 0.177285884 | 451.05   | 523.85   | 72.8    | 0.86102892  | 0.1872    | 1.164  |
| 100962_at   | 574.7  | 755.1  | 712    | 939.7  | 555.6  | 716.7  | 603.2  | 864.1  | 0.574741299 | 745.375  | 684.9    | 60.475  | 1.088297562 | 0.5728    | -1.088 |
| 100963_at   | 240.7  | 385.6  | 369.7  | 261.3  | 868.1  | 313.2  | 439.7  | 212.5  | 0.397197358 | 314.325  | 458.375  | 144.05  | 0.68573766  | 0.4491    | 1.297  |
| 100964_at   | 720.1  | 647.2  | 603.6  | 712.7  | 894.3  | 757    | 807    | 526.3  | 0.420980783 | 670.9    | 746.15   | 75.25   | 0.899148965 | 0.4903    | 1.094  |
| 100965_at   | 577.4  | 508.7  | 600.2  | 630.7  | 544    | 522.4  | 558.9  | 714    | 0.917010792 | 579.25   | 584.825  | 5.575   | 0.990467234 | 0.9557    | -1.005 |
| 100966_at   | 32.2   | 39.3   | 44.5   | 45.2   | 43.7   | 26.5   | 47     | 59.6   | 0.627719363 | 40.3     | 44.2     | 3.9     | 0.911764706 | 0.7594    | -1.062 |
| 100967_at   | 16.2   | 7.4    | 26.7   | 6.9    | 8.5    | 16     | 30.3   | 24.6   | 0.437766697 | 14.3     | 19.85    | 5.55    | 0.720403023 | 0.4083    | 1.466  |
| 100968_at   | 328.2  | 297.9  | 219.7  | 439.3  | 263.5  | 286.4  | 259.7  | 345.2  | 0.546414718 | 321.275  | 288.7    | 32.575  | 1.112833391 | 0.6153    | -1.087 |
| 100970_at   | 1008.4 | 1838.5 | 1236   | 1220.5 | 1455.6 | 1369.3 | 1854.4 | 1723.3 | 0.249693822 | 1325.85  | 1600.65  | 274.8   | 0.828319745 | 0.2049    | 1.228  |
| 100971_at   | 11.3   | 10.8   | 10.8   | 17.9   | 14.3   | 10.4   | 16.6   | 10.1   | 0.951080591 | 12.7     | 12.85    | 0.15    | 0.988326848 | 0.9541    | -1.01  |
| 100972_s_at | 194.1  | 231.6  | 182.7  | 181.8  | 466.8  | 298.1  | 340.9  | 279    | 0.034410363 | 197.55   | 346.2    | 148.65  | 0.570623917 | 0.005234  | 1.725  |
| 100973_i_at | 121.1  | 209.1  | 172    | 202.5  | 287.3  | 243.1  | 298.6  | 251.6  | 0.01049339  | 176.175  | 270.15   | 93.975  | 0.652137701 | 0.01622   | 1.562  |
| 100974_at   | 281.4  | 561.9  | 513.7  | 490.7  | 512.9  | 533.1  | 533.7  | 383.6  | 0.704169439 | 461.925  | 490.825  | 28.9    | 0.941119544 | 0.6465    | -1.089 |
| 100975_f_at | 32.9   | 26.1   | 89.3   | 25.5   | 28.6   | 64.1   | 71.6   | 41.1   | 0.683937613 | 43.45    | 51.35    | 7.9     | 0.846153846 | 0.5123    | 1.288  |
| 100976_at   | 1411.5 | 1513.9 | 1580.6 | 1397.7 | 1271.7 | 1550.2 | 1290.3 | 1168.8 | 0.156898784 | 1475.925 | 1320.25  | 155.675 | 1.117913274 | 0.1318    | -1.123 |
| 100977_at   | 823    | 782.2  | 979.5  | 1034.5 | 733    | 865.4  | 893.6  | 911.2  | 0.490532246 | 904.8    | 850.8    | 54      | 1.063469676 | 0.5112    | -1.06  |
| 100978_at   | 721.9  | 437.3  | 686.8  | 434.2  | 561    | 657.6  | 574.1  | 418.5  | 0.859017879 | 570.05   | 552.8    | 17.25   | 1.031204776 | 0.9316    | -1.015 |
| 100979_at   | 1150.4 | 1582   | 1203.5 | 1286.4 | 1265.3 | 1268.3 | 1223   | 1514   | 0.921506174 | 1305.575 | 1317.65  | 12.075  | 0.990835958 | 0.8817    | -1.013 |
| 100980_at   | 359.1  | 317.2  | 288.5  | 399.1  | 223.6  | 283    | 268.2  | 356.7  | 0.165820486 | 340.975  | 282.875  | 58.1    | 1.205391074 | 0.1568    | -1.213 |
| 100981_at   | 5.6    | 5.5    | 7.1    | 7.7    | 5.3    | 18.4   | 6.4    | 5.9    | 0.483253804 | 6.475    | 9        | 2.525   | 0.719444444 | 0.5306    | 1.221  |
| 100982_at   | 156.1  | 272.2  | 200.2  | 154.9  | 104.2  | 140    | 89.5   | 91.7   | 0.039719705 | 195.85   | 106.35   | 89.5    | 1.841560884 | 0.01178   | -1.822 |
| 100983_at   | 98     | 228.8  | 134    | 197.8  | 96.8   | 239.3  | 205.6  | 182.5  | 0.713006564 | 164.65   | 181.05   | 16.4    | 0.909417288 | 0.7426    | -1.1   |
| 100984_at   | 859    | 1196.2 | 912.9  | 1016.7 | 672    | 1021.1 | 882.9  | 939.1  | 0.307108833 | 996.2    | 878.775  | 117.425 | 1.13362351  | 0.3083    | -1.138 |
| 100985_at   | 390.5  | 398.4  | 438.1  | 433.1  | 412.5  | 657.1  | 474.4  | 392.5  | 0.337007365 | 415.025  | 484.125  | 69.1    | 0.857268267 | 0.3049    | 1.144  |
| 100986_at   | 1708.2 | 1799.1 | 1664.4 | 1583   | 1575.9 | 1467.6 | 1306.4 | 1257.8 | 0.020818938 | 1688.675 | 1401.925 | 286.75  | 1.204540186 | 0.01776   | -1.208 |
| 100987_f_at | 495.3  | 465    | 506.9  | 473.8  | 554.2  | 476.3  | 536.4  | 500.5  | 0.179196566 | 485.25   | 516.85   | 31.6    | 0.938860404 | 0.1672    | -1.064 |
| 100988_at   | 391    | 499.9  | 433.8  | 398.7  | 373.1  | 460.5  | 385.5  | 523.5  | 0.915096403 | 430.85   | 435.65   | 4.8     | 0.988981981 | 0.9505    | -1.006 |
| 100989_at   | 416.9  | 345.5  | 323    | 290.4  | 337.2  | 291.4  | 281    | 245.8  | 0.149393017 | 343.95   | 288.85   | 55.1    | 1.190756448 | 0.1357    | -1.188 |
| 100990_g_at | 572.7  | 521.7  | 543.8  | 460.7  | 838.7  | 500.9  | 606.9  | 438.4  | 0.483280479 | 524.725  | 596.225  | 71.5    | 0.880078829 | 0.5244    | -1.105 |
| 100991_at   | 201.5  | 215.1  | 177.9  | 176.8  | 199.2  | 213.9  | 188.1  | 214.8  | 0.366994837 | 192.825  | 204      | 11.175  | 0.945220588 | 0.3508    | -1.06  |
| 100992_at   | 469.1  | 604.2  | 465    | 574.9  | 368.7  | 503.7  | 428.1  | 619.8  | 0.48993831  | 528.3    | 480.075  | 48.225  | 1.100453054 | 0.4411    | -1.114 |
| 100994_at   | 196.7  | 168.6  | 152.4  | 144.1  | 100.8  | 133    | 162.6  | 175.9  | 0.318158147 | 165.45   | 143.075  | 22.375  | 1.156386511 | 0.3008    | -1.174 |



|             |         |         |         |        |         |        |        |        |             |           |           |         |             |            |        |
|-------------|---------|---------|---------|--------|---------|--------|--------|--------|-------------|-----------|-----------|---------|-------------|------------|--------|
| 100995_at   | 18.9    | 33      | 29.4    | 8.4    | 29.5    | 12.7   | 20.9   | 22.1   | 0.869950608 | 22.425    | 21.3      | 1.125   | 1.052816901 | 0.9391     | -1.029 |
| 100996_at   | 33.5    | 45.8    | 35      | 51.1   | 20.7    | 30     | 48.3   | 5.6    | 0.19441383  | 41.35     | 26.15     | 15.2    | 1.58126195  | 0.1909     | -2.005 |
| 100997_at   | 132.7   | 189.4   | 205.1   | 98.6   | 168.3   | 144.5  | 151.6  | 166.4  | 0.963608657 | 156.45    | 157.7     | 1.25    | 0.992073557 | 0.7955     | -1.048 |
| 100998_at   | 25.8    | 35.4    | 29.5    | 25.3   | 198.2   | 247.1  | 279.1  | 193    | 0.002109164 | 29        | 229.35    | 200.35  | 0.126444299 | 0.00000221 | 7.889  |
| 101000_at   | 608.9   | 1038.7  | 918.2   | 798.8  | 639.8   | 1078.4 | 845    | 804.7  | 0.995094501 | 841.15    | 841.975   | 0.825   | 0.999020161 | 0.9861     | -1.003 |
| 101001_at   | 1874.9  | 1606.3  | 1534.5  | 1541.4 | 1280.6  | 1845.6 | 1146.9 | 1814.3 | 0.582390321 | 1639.275  | 1521.85   | 117.425 | 1.077159378 | 0.5026     | -1.097 |
| 101002_at   | 2145.6  | 1641.4  | 1739.5  | 1941.9 | 1448.3  | 1518.8 | 1632.1 | 1469.2 | 0.045467768 | 1867.1    | 1517.1    | 350     | 1.230703316 | 0.0205     | -1.226 |
| 101003_at   | 462.4   | 385.4   | 329.9   | 376.5  | 335.8   | 335.1  | 385.9  | 337.6  | 0.252894646 | 388.55    | 348.6     | 39.95   | 1.114601262 | 0.2322     | -1.109 |
| 101004_f_at | 2116.6  | 2078.4  | 2263.3  | 2894   | 2568.6  | 2347   | 2277.5 | 2160.5 | 0.998825469 | 2338.075  | 2338.4    | 0.325   | 0.999861016 | 0.9345     | -1.007 |
| 101006_at   | 165.9   | 121.4   | 154.4   | 168.6  | 172.1   | 129.2  | 138.5  | 120.6  | 0.455517992 | 152.575   | 140.1     | 12.475  | 1.08904354  | 0.4572     | -1.09  |
| 101007_at   | 448.5   | 589.2   | 533     | 519.1  | 478.2   | 524.5  | 560.9  | 640    | 0.549316592 | 522.45    | 550.9     | 28.45   | 0.948357234 | 0.5548     | -1.053 |
| 101008_at   | 388.2   | 473.9   | 395.8   | 423.7  | 339.6   | 454.1  | 420    | 391.5  | 0.561870076 | 420.4     | 401.3     | 19.1    | 1.047595315 | 0.5456     | -1.05  |
| 101009_at   | 557.6   | 521.4   | 482.6   | 351    | 1150.9  | 781.1  | 985.2  | 1022.2 | 0.002556823 | 478.15    | 984.85    | 506.7   | 0.485505407 | 0.001418   | 2.071  |
| 101010_at   | 7.8     | 15      | 24      | 20.8   | 19      | 17.5   | 17     | 19.2   | 0.745734343 | 16.9      | 18.175    | 1.275   | 0.929848693 | 0.5621     | 1.168  |
| 101011_at   | 5084.6  | 4376.9  | 4450.7  | 4102.5 | 3538.4  | 4206.3 | 3786   | 4391.6 | 0.115696613 | 4503.675  | 3980.575  | 523.1   | 1.131413175 | 0.1123     | -1.132 |
| 101013_at   | 9412.3  | 10523.8 | 9877.3  | 7971.3 | 11435.7 | 7983.6 | 9030.2 | 8085.5 | 0.759419284 | 9446.175  | 9133.75   | 312.425 | 1.034205556 | 0.7143     | -1.04  |
| 101014_at   | 399.1   | 412.7   | 385.4   | 497.8  | 453.6   | 399    | 418.5  | 508.1  | 0.567801638 | 423.75    | 444.8     | 21.05   | 0.95267536  | 0.5503     | -1.05  |
| 101015_s_at | 325.3   | 252.1   | 350.9   | 267.7  | 354     | 325.7  | 236.3  | 240.2  | 0.802510246 | 299       | 289.05    | 9.95    | 1.03442311  | 0.7642     | -1.042 |
| 101016_at   | 10677.9 | 10944.2 | 11144.6 | 9636.4 | 10182.9 | 9965.1 | 10627  | 9493.9 | 0.245904061 | 10600.775 | 10067.225 | 533.55  | 1.052998716 | 0.2505     | -1.052 |
| 101017_at   | 1869.3  | 1743.8  | 1089    | 1297.5 | 1185.3  | 1418.8 | 981.9  | 1953.9 | 0.694764518 | 1499.9    | 1384.975  | 114.925 | 1.082979837 | 0.6619     | -1.093 |
| 101019_at   | 161.2   | 129.3   | 122.1   | 118.5  | 115.6   | 184    | 144    | 153.1  | 0.37965671  | 132.775   | 149.175   | 16.4    | 0.890062008 | 0.3865     | 1.117  |
| 101020_at   | 91.5    | 75.6    | 52.1    | 73.1   | 56.3    | 69.7   | 64.7   | 89.4   | 0.785688945 | 73.075    | 70.025    | 3.05    | 1.043555873 | 0.8136     | -1.038 |
| 101022_at   | 27.7    | 7.9     | 40.4    | 43.1   | 59.6    | 33.2   | 23     | 35.3   | 0.500495849 | 29.775    | 37.775    | 8       | 0.788219722 | 0.4461     | 1.43   |
| 101023_f_at | 614.7   | 1065    | 817.8   | 948    | 1314.7  | 996.9  | 1134.8 | 903.1  | 0.136978631 | 861.375   | 1087.375  | 226     | 0.792160018 | 0.1419     | 1.275  |
| 101024_i_at | 32      | 36.7    | 32.4    | 32.9   | 43.1    | 29.5   | 44     | 30     | 0.494900647 | 33.5      | 36.65     | 3.15    | 0.914051842 | 0.5494     | -1.075 |
| 101025_f_at | 116.7   | 147.2   | 173.4   | 133.2  | 157.8   | 142.2  | 131.5  | 147    | 0.886465426 | 142.625   | 144.625   | 2       | 0.986171132 | 0.8163     | -1.023 |
| 101026_at   | 15.1    | 25.5    | 30.5    | 22     | 3.6     | 27     | 38.1   | 34.3   | 0.782450942 | 23.275    | 25.75     | 2.475   | 0.903883495 | 0.7681     | -1.195 |
| 101027_s_at | 2218.8  | 1996.1  | 1946.1  | 1475.5 | 2752    | 1805.4 | 2156.7 | 1682.8 | 0.534898139 | 1909.125  | 2099.225  | 190.1   | 0.909442771 | 0.5559     | -1.091 |
| 101028_i_at | 86      | 22.1    | 30.8    | 29.5   | 49.5    | 31     | 47.9   | 96.7   | 0.513549466 | 42.1      | 56.275    | 14.175  | 0.74811195  | 0.3863     | 1.425  |
| 101029_f_at | 1277.7  | 890.4   | 1302.8  | 1155.5 | 925.3   | 1180.1 | 905.2  | 940.2  | 0.196412563 | 1156.6    | 987.7     | 168.9   | 1.171003341 | 0.2036     | -1.165 |
| 101030_at   | 1493.3  | 2160.8  | 1384.2  | 2414.1 | 1206.5  | 1465.1 | 1554.5 | 1885.4 | 0.299816955 | 1863.1    | 1527.875  | 335.225 | 1.219406038 | 0.3079     | -1.201 |
| 101031_at   | 689.5   | 607.6   | 684.7   | 597.2  | 664.7   | 644.6  | 650.9  | 644.5  | 0.812844324 | 644.75    | 651.175   | 6.425   | 0.990133221 | 0.7675     | -1.012 |
| 101033_at   | 82.4    | 24.2    | 72.4    | 32.4   | 84.3    | 85.3   | 54.4   | 40.4   | 0.49653149  | 52.85     | 66.1      | 13.25   | 0.799546142 | 0.4186     | 1.356  |
| 101034_at   | 300.8   | 396.8   | 410.1   | 309.8  | 151.7   | 448.2  | 301.6  | 400.4  | 0.705954597 | 354.375   | 325.475   | 28.9    | 1.088793302 | 0.5713     | -1.166 |
| 101035_at   | 1344.4  | 1049.6  | 1100.8  | 1019.8 | 699.9   | 1109.7 | 1083.5 | 1171.3 | 0.42386554  | 1128.65   | 1016.1    | 112.55  | 1.110766657 | 0.411      | -1.126 |
| 101036_at   | 200.7   | 252.5   | 317.6   | 332.1  | 456.4   | 341    | 364.2  | 191.6  | 0.367334133 | 275.725   | 338.3     | 62.575  | 0.815031038 | 0.4479     | 1.194  |
| 101037_at   | 27      | 129.3   | 58.7    | 102.8  | 37.5    | 100.5  | 20.8   | 98.5   | 0.639810874 | 79.45     | 64.325    | 15.125  | 1.235134085 | 0.6479     | -1.284 |
| 101039_at   | 2165.5  | 3174.7  | 2824    | 2694.5 | 1857.1  | 2353.5 | 2344.9 | 2121.8 | 0.07531683  | 2714.675  | 2169.325  | 545.35  | 1.251391562 | 0.06542    | -1.245 |
| 101040_at   | 526.1   | 721     | 627.4   | 547.9  | 533.4   | 635.5  | 591    | 402    | 0.370815378 | 605.6     | 540.475   | 65.125  | 1.12049586  | 0.3665     | -1.128 |
| 101041_at   | 25      | 33.6    | 26      | 28.1   | 13.9    | 15.3   | 13.2   | 16.9   | 0.002930325 | 28.175    | 14.825    | 13.35   | 1.900505902 | 0.0003     | -1.896 |
| 101042_f_at | 627     | 497.5   | 527.2   | 574.1  | 538.8   | 518.9  | 439.4  | 537    | 0.241889972 | 556.45    | 508.525   | 47.925  | 1.094243154 | 0.2467     | -1.094 |
| 101043_f_at | 53.9    | 49.2    | 71.8    | 27.5   | 52      | 54.7   | 23     | 68     | 0.931690265 | 50.6      | 49.425    | 1.175   | 1.023773394 | 0.8977     | -1.043 |
| 101044_at   | 1143.3  | 2308.8  | 1527.4  | 1754.2 | 2468.8  | 1806.8 | 2476   | 1568.3 | 0.282991465 | 1683.425  | 2079.975  | 396.55  | 0.80934867  | 0.2736     | 1.251  |
| 101045_at   | 1924.1  | 1632.9  | 1875.9  | 1581.7 | 2523.9  | 1832.4 | 2192.1 | 1785   | 0.155982942 | 1753.65   | 2083.35   | 329.7   | 0.841745266 | 0.1313     | 1.18   |
| 101046_at   | 48.5    | 62.6    | 83.8    | 36.8   | 75      | 40.7   | 53.6   | 97.8   | 0.603210609 | 57.925    | 66.775    | 8.85    | 0.867465369 | 0.6247     | 1.143  |
| 101047_at   | 1806    | 2612.3  | 2457.8  | 2254.6 | 2452.4  | 2494   | 2054.8 | 1905   | 0.813865344 | 2282.675  | 2226.55   | 56.125  | 1.025207159 | 0.8402     | -1.022 |
| 101048_at   | 19.9    | 3.6     | 21.2    | 39.1   | 44.9    | 18.4   | 28.6   | 46     | 0.219457898 | 20.95     | 34.475    | 13.525  | 0.60768673  | 0.2398     | 2.072  |
| 101049_at   | 74.9    | 209.3   | 185.4   | 211.4  | 344.2   | 206.7  | 219.3  | 258.1  | 0.100856551 | 170.25    | 257.075   | 86.825  | 0.662258096 | 0.1376     | 1.6    |
| 101050_at   | 618.1   | 509.9   | 502.6   | 606.8  | 421.2   | 525.7  | 423.3  | 460    | 0.043072852 | 559.35    | 457.55    | 101.8   | 1.222489345 | 0.03802    | -1.222 |
| 101051_at   | 120.8   | 106.5   | 153.7   | 99.4   | 190.2   | 97.5   | 102.3  | 144.4  | 0.610191122 | 120.1     | 133.6     | 13.5    | 0.898952096 | 0.668      | -1.086 |
| 101052_g_at | 21.1    | 41.1    | 14.8    | 21.9   | 37.6    | 2.5    | 19.6   | 53.9   | 0.781687028 | 24.725    | 28.4      | 3.675   | 0.870598592 | 0.7317     | -1.294 |
| 101053_at   | 2334.8  | 1624.7  | 2230.8  | 1942.3 | 1697.7  | 1954.1 | 2078   | 2278.5 | 0.882243597 | 2033.15   | 2002.075  | 31.075  | 1.015521397 | 0.9153     | -1.011 |
| 101054_at   | 182     | 167.5   | 180.6   | 156.2  | 297.4   | 409.2  | 340.8  | 322.1  | 0.004177853 | 171.575   | 342.375   | 170.8   | 0.5011318   | 0.00011    | 1.985  |
| 101055_at   | 948.9   | 1012.2  | 905.3   | 1006.1 | 1178.8  | 948.5  | 1087.3 | 1097.8 | 0.103139679 | 968.125   | 1078.1    | 109.975 | 0.897991837 | 0.09112    | 1.111  |
| 101056_at   | 2579.1  | 2561.5  | 2363.9  | 2975   | 2560.1  | 2228.2 | 2887.6 | 2789.2 | 0.985843658 | 2619.875  | 2616.275  | 3.6     | 1.001376002 | 0.9713     | -1.003 |
| 101057_at   | 711.4   | 724.6   | 702.4   | 602.2  | 903.5   | 554.6  | 650.7  | 721.6  | 0.790565549 | 685.15    | 707.6     | 22.45   | 0.968273036 | 0.8693     | -1.019 |



|             |        |        |        |        |        |        |        |        |             |          |          |          |             |         |        |
|-------------|--------|--------|--------|--------|--------|--------|--------|--------|-------------|----------|----------|----------|-------------|---------|--------|
| 101058_at   | 1.7    | 5      | 3.4    | 13.8   | 41.9   | 11     | 13.2   | 22.2   | 0.101983661 | 5.975    | 22.075   | 16.1     | 0.270668177 | 0.03367 | 4.298  |
| 101059_at   | 3133.1 | 4181.8 | 3672.2 | 3201.5 | 5228.9 | 3901.9 | 3888.2 | 3099.9 | 0.385262422 | 3547.15  | 4029.725 | 482.575  | 0.880246171 | 0.3906  | 1.124  |
| 101060_at   | 3132.4 | 2733.8 | 2201.6 | 3542   | 3627.9 | 3245.8 | 3881.7 | 3053.2 | 0.166480109 | 2902.45  | 3452.15  | 549.7    | 0.8407659   | 0.1612  | 1.202  |
| 101061_at   | 2209.6 | 1899.6 | 2101.2 | 1794.3 | 2244.5 | 2161.7 | 2101.1 | 1638.3 | 0.839229231 | 2001.175 | 2036.4   | 35.225   | 0.982702318 | 0.8801  | -1.014 |
| 101062_at   | 279.7  | 247    | 249.2  | 245.4  | 247.3  | 247.5  | 286.3  | 238    | 0.968891261 | 255.325  | 254.775  | 0.55     | 1.002158768 | 0.9514  | -1.003 |
| 101063_at   | 163.3  | 86     | 110.8  | 129.2  | 118.3  | 112.4  | 118.9  | 72.5   | 0.430713425 | 122.325  | 105.525  | 16.8     | 1.15920398  | 0.4646  | -1.151 |
| 101064_at   | 1922   | 1221.6 | 1206.5 | 1261.1 | 1215   | 1292.5 | 1317.2 | 1499.1 | 0.716931892 | 1402.8   | 1330.95  | 71.85    | 1.053983996 | 0.7788  | -1.036 |
| 101065_at   | 4411.1 | 3913.1 | 4252.2 | 4083.5 | 5000.3 | 3487.8 | 3961.8 | 3659.3 | 0.720297418 | 4164.975 | 4027.3   | 137.675  | 1.034185434 | 0.6303  | -1.043 |
| 101067_at   | 2183.9 | 1956.3 | 2038.8 | 2043.8 | 2753.1 | 1963.7 | 2419.8 | 1832.4 | 0.447845626 | 2055.7   | 2242.25  | 186.55   | 0.916802319 | 0.4702  | -1.077 |
| 101068_at   | 158.1  | 152.7  | 185.3  | 226.3  | 134.6  | 184.1  | 160.3  | 163.4  | 0.35600015  | 180.6    | 160.6    | 20       | 1.124533001 | 0.3542  | -1.117 |
| 101069_g_at | 2236.2 | 1946.5 | 1906.9 | 2098.4 | 1768.4 | 2183.3 | 1510.1 | 1770.7 | 0.196380716 | 2047     | 1808.125 | 238.875  | 1.132111994 | 0.1703  | -1.14  |
| 101070_at   | 553.1  | 569.1  | 528.3  | 702.4  | 392.7  | 712.4  | 645.9  | 518.7  | 0.807765861 | 588.225  | 567.425  | 20.8     | 1.036656827 | 0.7199  | -1.057 |
| 101071_at   | 116    | 89.1   | 95.7   | 68.4   | 162.1  | 189.8  | 162.9  | 176.3  | 0.000860697 | 92.3     | 172.775  | 80.475   | 0.534220807 | 0.00143 | 1.901  |
| 101072_at   | 845    | 1153.2 | 1100.1 | 1045.9 | 1101.5 | 1138.5 | 1136.4 | 1054.5 | 0.372162051 | 1036.05  | 1107.725 | 71.675   | 0.935295312 | 0.3421  | -1.076 |
| 101073_at   | 865.8  | 1791.9 | 1150.7 | 1282.2 | 1550.6 | 1268.7 | 1425.8 | 1686.7 | 0.3770842   | 1272.65  | 1482.95  | 210.3    | 0.858188071 | 0.3058  | 1.199  |
| 101074_at   | 653.4  | 766.8  | 829.2  | 848.5  | 1099.2 | 925.4  | 1167.4 | 702.9  | 0.15069803  | 774.475  | 973.725  | 199.25   | 0.795373437 | 0.1435  | 1.24   |
| 101075_f_at | 23.1   | 42     | 5.3    | 29.6   | 13.7   | 36.6   | 43.7   | 20.2   | 0.743485772 | 25       | 28.55    | 3.55     | 0.875656743 | 0.6337  | 1.303  |
| 101076_r_at | 47.2   | 44.3   | 43.2   | 57     | 29.2   | 57.4   | 69     | 38.7   | 0.949043625 | 47.925   | 48.575   | 0.65     | 0.986618631 | 0.8673  | -1.036 |
| 101077_at   | 77.5   | 16.3   | 78.7   | 46.4   | 89.2   | 72.5   | 58.9   | 41.4   | 0.573432453 | 54.725   | 65.5     | 10.775   | 0.835496183 | 0.4763  | 1.359  |
| 101078_at   | 4014   | 4663.3 | 4474.6 | 3787.5 | 6925.5 | 4467.4 | 5360.8 | 4362.9 | 0.176709127 | 4234.85  | 5279.15  | 1044.3   | 0.802184064 | 0.1287  | 1.229  |
| 101079_at   | 709.7  | 710.2  | 773.2  | 671.1  | 579.3  | 827.2  | 823.9  | 670.4  | 0.89441695  | 716.05   | 725.2    | 9.15     | 0.987382791 | 0.9754  | -1.003 |
| 101080_at   | 460.1  | 806    | 614.5  | 762    | 582.1  | 614.9  | 500.5  | 717.2  | 0.557088322 | 660.65   | 603.675  | 56.975   | 1.094380254 | 0.6269  | -1.078 |
| 101081_at   | 1500.7 | 2512.2 | 1784.2 | 2071.9 | 1566.5 | 2080.8 | 1847.3 | 1726   | 0.535579493 | 1967.25  | 1805.15  | 162.1    | 1.089798632 | 0.5778  | -1.076 |
| 101082_at   | 3738.6 | 5083.1 | 4737.3 | 5741.4 | 4544.3 | 4046.5 | 5167.6 | 4691.5 | 0.675837921 | 4825.1   | 4612.475 | 212.625  | 1.046097811 | 0.7328  | -1.038 |
| 101083_s_at | 640.8  | 1013   | 698.8  | 544.3  | 1064.5 | 590.8  | 844.8  | 711.2  | 0.603528606 | 724.225  | 802.825  | 78.6     | 0.902095724 | 0.5795  | -1.112 |
| 101084_f_at | 2468.3 | 1994.8 | 2289.6 | 1982.6 | 3224.1 | 2106.2 | 2680.8 | 1916.5 | 0.403514464 | 2183.825 | 2481.9   | 298.075  | 0.879900479 | 0.4229  | 1.118  |
| 101085_at   | 1002.2 | 1255.7 | 1112.8 | 1131.1 | 2421.8 | 954.3  | 1272.3 | 1102.8 | 0.42119157  | 1125.45  | 1437.8   | 312.35   | 0.782758381 | 0.4274  | 1.196  |
| 101086_f_at | 7397.1 | 6236.9 | 6750.8 | 5601.4 | 6597.3 | 6044.3 | 6165.1 | 5336   | 0.362142831 | 6496.55  | 6035.675 | 460.875  | 1.076358485 | 0.3712  | -1.074 |
| 101087_r_at | 15.6   | 30.4   | 13.3   | 22.7   | 15.6   | 12     | 16.7   | 29.7   | 0.726819526 | 20.5     | 18.5     | 2        | 1.108108108 | 0.7051  | -1.112 |
| 101088_f_at | 5081.4 | 3923.7 | 4014.6 | 4362.5 | 3645.6 | 3907.7 | 3396.6 | 4469.1 | 0.210303122 | 4345.55  | 3854.75  | 490.8    | 1.127323432 | 0.1978  | -1.127 |
| 101089_at   | 1767.5 | 2263.8 | 2021.9 | 2148   | 2139.6 | 2438.7 | 2091.2 | 2204.2 | 0.252196133 | 2050.3   | 2218.425 | 168.125  | 0.924214251 | 0.2462  | -1.085 |
| 101090_at   | 1933.9 | 2900.3 | 2507.3 | 2195.3 | 2440.1 | 2316.1 | 2999.6 | 2233.2 | 0.691034202 | 2384.2   | 2497.25  | 113.05   | 0.954730203 | 0.6572  | -1.052 |
| 101091_at   | 5149.7 | 3805.6 | 4445.6 | 3943.3 | 3531.4 | 4051.4 | 3812.4 | 3916.9 | 0.195551971 | 4336.05  | 3828.025 | 508.025  | 1.132712038 | 0.1611  | -1.126 |
| 101093_at   | 3794.2 | 5332.6 | 4253.3 | 3954   | 4801.2 | 3780.7 | 4593.9 | 4125.7 | 0.985089275 | 4333.525 | 4325.375 | 8.15     | 1.00188423  | 0.9776  | -1.003 |
| 101094_at   | 400.6  | 381.8  | 386.1  | 398.9  | 376.9  | 353.6  | 384.3  | 324.4  | 0.093421464 | 391.85   | 359.8    | 32.05    | 1.089077265 | 0.07175 | -1.091 |
| 101095_at   | 5513.2 | 4428.5 | 4770.9 | 4008.2 | 5268.6 | 5794.3 | 5355.2 | 6373.2 | 0.048387327 | 4680.2   | 5697.825 | 1017.625 | 0.821401149 | 0.04608 | 1.222  |
| 101096_s_at | 953.9  | 897.5  | 932.2  | 861.8  | 914.6  | 741.7  | 728.5  | 755.3  | 0.054794915 | 911.35   | 785.025  | 126.325  | 1.160918442 | 0.03732 | -1.165 |
| 101097_at   | 1299.2 | 1061.9 | 1240.6 | 1051   | 1353.2 | 1107   | 944.1  | 867    | 0.479394385 | 1163.175 | 1067.825 | 95.35    | 1.089293658 | 0.4241  | -1.101 |
| 101099_at   | 28.8   | 48.4   | 30.4   | 37.8   | 28.9   | 62.9   | 39.9   | 25     | 0.781885083 | 36.35    | 39.175   | 2.825    | 0.927887683 | 0.9028  | -1.031 |
| 101101_at   | 1571.7 | 1963.4 | 1795.6 | 1670.7 | 1451.7 | 1836.1 | 1736.8 | 1734.2 | 0.62653873  | 1750.35  | 1689.7   | 60.65    | 1.035893946 | 0.6293  | -1.036 |
| 101102_at   | 1038.3 | 815.2  | 891    | 901.1  | 556.2  | 868.3  | 647.3  | 913.8  | 0.157287901 | 911.4    | 746.4    | 165      | 1.221061093 | 0.1434  | -1.242 |
| 101103_at   | 28.5   | 11.2   | 50.9   | 9.8    | 22.6   | 31     | 12.7   | 23     | 0.801267608 | 25.1     | 22.325   | 2.775    | 1.124300112 | 0.8917  | -1.064 |
| 101104_at   | 855.2  | 764.6  | 713.7  | 837.9  | 670.4  | 774.6  | 711.3  | 693.2  | 0.09587617  | 792.85   | 712.375  | 80.475   | 1.112967187 | 0.08852 | -1.112 |
| 101105_at   | 5186.5 | 4754.2 | 4836   | 4804.1 | 4714.4 | 4486.3 | 4588.7 | 4886.6 | 0.135717154 | 4895.2   | 4669     | 226.2    | 1.048447205 | 0.1308  | -1.048 |
| 101106_at   | 2226.3 | 1606.8 | 1980.7 | 2085.6 | 1374.2 | 1610.3 | 1667.2 | 1720.2 | 0.056872377 | 1974.85  | 1592.975 | 381.875  | 1.239724415 | 0.05007 | -1.235 |
| 101107_at   | 3657.3 | 3025.7 | 3340.4 | 3254.3 | 3079.2 | 3538.2 | 3514.1 | 2908.4 | 0.781710446 | 3319.425 | 3259.975 | 59.45    | 1.018236336 | 0.7677  | -1.02  |
| 101108_at   | 843.8  | 538.1  | 673.2  | 689.6  | 412.6  | 585    | 523.3  | 426.7  | 0.043089288 | 686.175  | 486.9    | 199.275  | 1.409272951 | 0.03346 | -1.406 |
| 101109_at   | 1911.5 | 4007   | 2338.3 | 3166.1 | 2686.4 | 2604.8 | 3176.8 | 2854.3 | 0.961166886 | 2855.725 | 2830.575 | 25.15    | 1.008885121 | 0.8736  | -1.028 |
| 101110_at   | 3805.1 | 4939.5 | 3748.3 | 4328.4 | 3842.9 | 5636.5 | 5006.9 | 4896.1 | 0.220567591 | 4205.325 | 4845.6   | 640.275  | 0.867864661 | 0.2269  | 1.149  |
| 101111_at   | 180.2  | 125.7  | 217.9  | 110.7  | 217.4  | 158.7  | 146.1  | 141.5  | 0.818765186 | 158.625  | 165.925  | 7.3      | 0.956004219 | 0.7308  | -1.069 |
| 101112_g_at | 2605.1 | 2537.5 | 2373.8 | 2460.5 | 2245.6 | 2776.4 | 1658.5 | 2309.4 | 0.364022543 | 2494.225 | 2247.475 | 246.75   | 1.109789875 | 0.311   | -1.128 |
| 101113_at   | 1283.4 | 1575.6 | 908.8  | 1215.4 | 982.1  | 1343.1 | 1439.8 | 1269.9 | 0.941637907 | 1245.8   | 1258.725 | 12.925   | 0.989731673 | 0.8963  | -1.019 |
| 101114_at   | 40.9   | 48.2   | 82.1   | 69.6   | 60.7   | 83     | 90     | 81.9   | 0.159944489 | 60.2     | 78.9     | 18.7     | 0.762991128 | 0.1537  | 1.347  |
| 101115_at   | 27.5   | 21.4   | 25.3   | 14.7   | 94.7   | 46.9   | 21.9   | 113.4  | 0.11116361  | 22.225   | 69.225   | 47       | 0.321054532 | 0.04948 | 2.663  |
| 101116_at   | 5      | 4.5    | 3.3    | 4.3    | 4.9    | 3.1    | 3      | 5.2    | 0.754804738 | 4.275    | 4.05     | 0.225    | 1.055555556 | 0.6923  | -1.073 |
| 101117_at   | 4.6    | 6      | 8      | 9.3    | 10.9   | 4.3    | 9.6    | 6.1    | 0.700845329 | 6.975    | 7.725    | 0.75     | 0.902912621 | 0.7754  | -1.082 |



|             |         |         |         |         |         |         |         |         |             |          |           |          |             |         |        |
|-------------|---------|---------|---------|---------|---------|---------|---------|---------|-------------|----------|-----------|----------|-------------|---------|--------|
| 101118_at   | 5.4     | 27.6    | 4.6     | 23.8    | 38.7    | 29.6    | 27.6    | 19      | 0.121975286 | 15.35    | 28.725    | 13.375   | 0.53437772  | 0.1199  | 2.465  |
| 101119_at   | 23.8    | 18.7    | 15.9    | 27      | 28.9    | 26.8    | 35.2    | 19.6    | 0.177048985 | 21.35    | 27.625    | 6.275    | 0.772850679 | 0.1844  | 1.293  |
| 101120_at   | 7.4     | 23.6    | 24.9    | 14.6    | 14.3    | 12.5    | 19.6    | 10.6    | 0.496056808 | 17.625   | 14.25     | 3.375    | 1.236842105 | 0.6771  | -1.145 |
| 101121_at   | 5.3     | 2.5     | 2.7     | 5.9     | 5.2     | 9.5     | 4.1     | 9.1     | 0.134879578 | 4.1      | 6.975     | 2.875    | 0.58781362  | 0.1293  | 1.712  |
| 101122_at   | 13.3    | 25.9    | 35.6    | 29.9    | 44.4    | 52      | 55.8    | 53.5    | 0.006704825 | 26.175   | 51.425    | 25.25    | 0.50899368  | 0.01597 | 2.081  |
| 101123_at   | 5038.1  | 4637.3  | 4014.3  | 4181.5  | 4539.6  | 4949.2  | 4745.6  | 5177.9  | 0.212506814 | 4467.8   | 4853.075  | 385.275  | 0.920612189 | 0.1947  | -1.089 |
| 101124_at   | 29.4    | 43.4    | 13.6    | 49.4    | 10.6    | 10.1    | 50.9    | 62.3    | 0.977103399 | 33.95    | 33.475    | 0.475    | 1.014189694 | 0.6996  | -1.259 |
| 101125_at   | 1.1     | 1.4     | 3.5     | 1.4     | 4.5     | 1.6     | 1.2     | 2.9     | 0.481568543 | 1.85     | 2.55      | 0.7      | 0.725490196 | 0.454   | 1.374  |
| 101126_r_at | 1.5     | 1.4     | 7.5     | 1.6     | 13.5    | 2.1     | 19.7    | 8       | 0.126931451 | 3        | 10.825    | 7.825    | 0.277136259 | 0.08486 | 3.691  |
| 101127_at   | 35.6    | 38.7    | 14.5    | 7.3     | 11.6    | 33.2    | 14.3    | 33.4    | 0.92956583  | 24.025   | 23.125    | 0.9      | 1.038918919 | 0.9059  | -1.062 |
| 101128_at   | 200.4   | 129.6   | 187.2   | 196.7   | 100.5   | 144.6   | 152.7   | 145.5   | 0.085856725 | 178.475  | 135.825   | 42.65    | 1.314006994 | 0.1028  | -1.312 |
| 101129_at   | 14971.2 | 15390.2 | 17405.1 | 13275.9 | 22884.7 | 14429.3 | 20597.5 | 13517.1 | 0.351786504 | 15260.6  | 17857.15  | 2596.55  | 0.854593258 | 0.3709  | 1.146  |
| 101130_at   | 6558.2  | 10301.8 | 7074.3  | 8747    | 9235.8  | 8490    | 9177.3  | 9096.3  | 0.404657539 | 8170.325 | 8999.85   | 829.525  | 0.907829019 | 0.3247  | 1.119  |
| 101131_at   | 128.9   | 115     | 174.5   | 150.1   | 100.4   | 107.7   | 157.9   | 226.5   | 0.859428543 | 142.125  | 148.125   | 6        | 0.959493671 | 0.9955  | -1.001 |
| 101132_at   | 23.7    | 9       | 9.7     | 20.1    | 27.9    | 25.4    | 34.9    | 11.7    | 0.180156969 | 15.625   | 24.975    | 9.35     | 0.625625626 | 0.2105  | 1.618  |
| 101133_at   | 9       | 8.1     | 12.9    | 7.6     | 7.2     | 8       | 16.1    | 5.8     | 0.963892492 | 9.4      | 9.275     | 0.125    | 1.013477089 | 0.7887  | -1.073 |
| 101134_at   | 11.5    | 10      | 3.9     | 5.6     | 3.1     | 2.8     | 9.7     | 2.7     | 0.247461367 | 7.75     | 4.575     | 3.175    | 1.693989071 | 0.1857  | -1.81  |
| 101135_at   | 4.1     | 4.6     | 3.3     | 3.2     | 8.8     | 1.5     | 3.3     | 5.3     | 0.600505301 | 3.8      | 4.725     | 0.925    | 0.804232804 | 0.9335  | -1.034 |
| 101136_at   | 22.8    | 9.2     | 12      | 23.4    | 16.1    | 24      | 33.5    | 46.1    | 0.141588023 | 16.85    | 29.925    | 13.075   | 0.563074353 | 0.1249  | 1.787  |
| 101137_at   | 14828.3 | 17187.1 | 14922.5 | 12504.7 | 21489   | 12686.8 | 16163.5 | 14293.6 | 0.573984805 | 14860.65 | 16158.225 | 1297.575 | 0.919695697 | 0.6095  | -1.073 |
| 101138_at   | 62.9    | 74.7    | 17.9    | 43.9    | 27      | 78      | 40.2    | 33.7    | 0.77136297  | 49.85    | 44.725    | 5.125    | 1.114589156 | 0.8775  | -1.065 |
| 101139_r_at | 9.9     | 9.2     | 8.2     | 12.6    | 6.9     | 4.6     | 11.5    | 10.1    | 0.393827845 | 9.975    | 8.275     | 1.7      | 1.205438066 | 0.3315  | -1.269 |
| 101140_at   | 59.3    | 43.8    | 44.2    | 51.7    | 95.2    | 39.1    | 15      | 14.2    | 0.675777647 | 49.75    | 40.875    | 8.875    | 1.217125382 | 0.3127  | -1.656 |
| 101141_at   | 38.5    | 24.5    | 44.7    | 57.3    | 22.1    | 47      | 52      | 54.4    | 0.803235717 | 41.25    | 43.875    | 2.625    | 0.94017094  | 0.865   | -1.05  |
| 101142_at   | 57.9    | 32.5    | 61.8    | 63      | 73.7    | 61.8    | 44.1    | 31.7    | 0.936755906 | 53.8     | 52.825    | 0.975    | 1.01845717  | 0.8926  | -1.035 |
| 101143_at   | 104.6   | 118.2   | 119.5   | 120.7   | 113.6   | 128.6   | 99.7    | 70.3    | 0.389311927 | 115.75   | 103.05    | 12.7     | 1.123241145 | 0.3423  | -1.149 |
| 101144_at   | 2.5     | 20.3    | 9.1     | 19.5    | 9.4     | 20.9    | 34.2    | 34.9    | 0.163223571 | 12.85    | 24.85     | 12       | 0.517102616 | 0.2098  | 2.265  |
| 101145_at   | 124.2   | 135.2   | 80.7    | 157.9   | 37.4    | 125.1   | 203.8   | 96.2    | 0.827026556 | 124.5    | 115.625   | 8.875    | 1.076756757 | 0.6015  | -1.236 |
| 101146_at   | 51.6    | 69.8    | 68      | 96      | 23.8    | 39.6    | 22.2    | 83.2    | 0.144141925 | 71.35    | 42.2      | 29.15    | 1.690758294 | 0.09639 | -1.916 |
| 101147_at   | 20.8    | 39.2    | 30      | 42.9    | 36.2    | 31.3    | 56.5    | 20.1    | 0.769869879 | 33.225   | 36.025    | 2.8      | 0.922276197 | 0.8544  | -1.053 |
| 101148_at   | 134.2   | 142.8   | 163.8   | 164     | 131.9   | 152.6   | 120.3   | 167.6   | 0.557525278 | 151.2    | 143.1     | 8.1      | 1.056603774 | 0.5303  | -1.061 |
| 101149_at   | 4.5     | 3.9     | 22.1    | 4.6     | 6       | 6.7     | 3.2     | 4.8     | 0.480076543 | 8.775    | 5.175     | 3.6      | 1.695652174 | 0.5691  | -1.306 |
| 101150_at   | 30.1    | 70.6    | 62.2    | 13.9    | 121.2   | 46.6    | 20.6    | 23.6    | 0.758274052 | 44.2     | 53        | 8.8      | 0.833962264 | 0.8615  | -1.106 |
| 101151_at   | 11.4    | 6.8     | 10.4    | 16.2    | 7.9     | 10.2    | 9.2     | 13.9    | 0.714196906 | 11.2     | 10.3      | 0.9      | 1.087378641 | 0.7888  | -1.062 |
| 101152_at   | 239.9   | 225.9   | 284.3   | 212.1   | 220     | 184.7   | 253.1   | 236.4   | 0.457491611 | 240.55   | 223.55    | 17       | 1.076045627 | 0.4535  | -1.077 |
| 101153_at   | 11.6    | 20.5    | 2.4     | 12      | 19.5    | 3.6     | 10.4    | 3.7     | 0.674466214 | 11.625   | 9.3       | 2.325    | 1.25        | 0.7238  | -1.258 |
| 101154_at   | 47.3    | 23.2    | 38.6    | 39.2    | 33      | 40.1    | 23.8    | 39.7    | 0.660709687 | 37.075   | 34.15     | 2.925    | 1.085651537 | 0.7287  | -1.074 |
| 101155_at   | 8.2     | 6.8     | 10.6    | 39.3    | 13.8    | 19.7    | 6.5     | 12.1    | 0.717449225 | 16.225   | 13.025    | 3.2      | 1.245681382 | 0.9713  | -1.017 |
| 101156_at   | 6.5     | 3.1     | 10      | 22.4    | 24.9    | 5.1     | 8.1     | 5.6     | 0.948535948 | 10.5     | 10.925    | 0.425    | 0.961098398 | 0.9207  | -1.059 |
| 101157_at   | 222.1   | 170.6   | 151.4   | 213.3   | 151.7   | 161.3   | 214.6   | 267.2   | 0.779111071 | 189.35   | 198.7     | 9.35     | 0.952944137 | 0.8372  | -1.035 |
| 101158_at   | 90.1    | 86.8    | 119.9   | 112.1   | 73      | 104.9   | 102.4   | 107.1   | 0.654442201 | 102.225  | 96.85     | 5.375    | 1.055498193 | 0.6585  | -1.058 |
| 101159_at   | 45.6    | 63.3    | 39.6    | 46.6    | 42.6    | 54.8    | 38.6    | 76.7    | 0.677530859 | 48.775   | 53.175    | 4.4      | 0.917254349 | 0.7334  | -1.067 |
| 101160_at   | 7.6     | 19.4    | 34.8    | 27.1    | 41.1    | 34.9    | 25.7    | 21.9    | 0.280295895 | 22.225   | 30.9      | 8.675    | 0.719255663 | 0.2711  | 1.553  |
| 101161_at   | 78.6    | 84.8    | 103.1   | 103.4   | 95.2    | 75.3    | 112     | 88.1    | 0.986546992 | 92.475   | 92.65     | 0.175    | 0.998111171 | 0.9912  | -1.001 |
| 101162_at   | 6       | 17      | 14.6    | 9.4     | 30.7    | 4.2     | 3.4     | 9.8     | 0.969966266 | 11.75    | 12.025    | 0.275    | 0.977130977 | 0.6122  | -1.343 |
| 101163_at   | 15.1    | 8.5     | 35.6    | 10.6    | 9.9     | 14.2    | 14.4    | 18.1    | 0.638861741 | 17.45    | 14.15     | 3.3      | 1.233215548 | 0.8443  | -1.072 |
| 101164_at   | 4       | 2.3     | 7.1     | 5.7     | 36.9    | 1.9     | 2.6     | 4.8     | 0.483809477 | 4.775    | 11.55     | 6.775    | 0.413419913 | 0.7823  | 1.228  |
| 101165_at   | 447.7   | 438.1   | 717.3   | 584.6   | 462.9   | 442.9   | 556.1   | 644.4   | 0.810012543 | 546.925  | 526.575   | 20.35    | 1.038645967 | 0.853   | -1.029 |
| 101166_at   | 28.9    | 49.5    | 15.2    | 25.9    | 11.1    | 58.8    | 35.8    | 17      | 0.952943565 | 29.875   | 30.675    | 0.8      | 0.97392013  | 0.8503  | -1.091 |
| 101167_at   | 39.8    | 33.9    | 13.6    | 19.4    | 22.9    | 25      | 4.2     | 43.6    | 0.795387725 | 26.675   | 23.925    | 2.75     | 1.114942529 | 0.6082  | -1.356 |
| 101168_at   | 227.3   | 194.3   | 215.4   | 213.1   | 210.4   | 396.1   | 117.5   | 341.1   | 0.457675705 | 212.525  | 266.275   | 53.75    | 0.79814102  | 0.6668  | 1.133  |
| 101169_at   | 34      | 14.4    | 17.2    | 11.9    | 64.8    | 18.3    | 14.4    | 13.1    | 0.570696713 | 19.375   | 27.65     | 8.275    | 0.700723327 | 0.6636  | 1.221  |
| 101170_at   | 21.6    | 5.1     | 5       | 6.8     | 17.1    | 5       | 12.4    | 9.3     | 0.791482506 | 9.625    | 10.95     | 1.325    | 0.878995434 | 0.5985  | 1.271  |
| 101171_at   | 19.4    | 38.2    | 15.2    | 15.3    | 14.2    | 38      | 22.6    | 19.2    | 0.850756708 | 22.025   | 23.5      | 1.475    | 0.937234043 | 0.8071  | -1.079 |
| 101172_at   | 27.1    | 20      | 21.1    | 23.8    | 22.5    | 19.7    | 25.6    | 28.7    | 0.669925923 | 23       | 24.125    | 1.125    | 0.953367876 | 0.6901  | -1.045 |
| 101173_at   | 60.2    | 60.1    | 60.1    | 45.9    | 39      | 75.3    | 50.7    | 13.4    | 0.427559972 | 56.575   | 44.6      | 11.975   | 1.268497758 | 0.325   | -1.497 |



|             |         |         |         |         |         |         |         |         |             |           |           |          |             |          |        |
|-------------|---------|---------|---------|---------|---------|---------|---------|---------|-------------|-----------|-----------|----------|-------------|----------|--------|
| 101174_at   | 12.3    | 65.6    | 67.3    | 14.9    | 18.2    | 19.2    | 19.4    | 15.4    | 0.245762015 | 40.025    | 18.05     | 21.975   | 2.217451524 | 0.31     | -1.671 |
| 101175_at   | 18      | 12.1    | 8.4     | 7.8     | 7.3     | 7.1     | 5.9     | 18.2    | 0.618654543 | 11.575    | 9.625     | 1.95     | 1.202597403 | 0.4878   | -1.264 |
| 101176_at   | 5.3     | 4.3     | 4.7     | 7.3     | 11.8    | 8       | 5.8     | 15.3    | 0.100942635 | 5.4       | 10.225    | 4.825    | 0.528117359 | 0.05153  | 1.808  |
| 101177_at   | 40.7    | 74.4    | 65.5    | 140.3   | 122.6   | 115.6   | 67.3    | 135.2   | 0.296957053 | 80.225    | 110.175   | 29.95    | 0.728159746 | 0.2472   | 1.468  |
| 101178_at   | 422.4   | 348.2   | 360.9   | 318.5   | 230.8   | 373.8   | 211.5   | 153.4   | 0.076765167 | 362.5     | 242.375   | 120.125  | 1.495616297 | 0.05897  | -1.568 |
| 101179_at   | 1972.7  | 1512.6  | 2099.3  | 2205.5  | 2038.2  | 1824.6  | 2181    | 1950    | 0.778247691 | 1947.525  | 1998.45   | 50.925   | 0.974517751 | 0.7261   | -1.034 |
| 101180_at   | 376.4   | 282.1   | 383.3   | 500.9   | 232.2   | 373.5   | 320.5   | 371.2   | 0.31648567  | 385.675   | 324.35    | 61.325   | 1.189070449 | 0.3331   | -1.186 |
| 101181_at   | 9.1     | 37      | 13.3    | 13.4    | 21.4    | 13.7    | 20.3    | 10.7    | 0.818978185 | 18.2      | 16.525    | 1.675    | 1.101361573 | 0.968    | -1.014 |
| 101182_at   | 105.4   | 150.1   | 124.9   | 150     | 90      | 124.6   | 91.3    | 118.3   | 0.109874276 | 132.6     | 106.05    | 26.55    | 1.250353607 | 0.1117   | -1.251 |
| 101183_at   | 17.9    | 28.2    | 31.6    | 34.8    | 12.1    | 16.5    | 31.9    | 79.4    | 0.691750963 | 28.125    | 34.975    | 6.85     | 0.804145818 | 0.961    | -1.023 |
| 101184_at   | 1325.5  | 1138.5  | 1308.9  | 1638.4  | 626.9   | 933.2   | 604.1   | 627.6   | 0.002963735 | 1352.825  | 697.95    | 654.875  | 1.938283545 | 0.001897 | -1.954 |
| 101185_at   | 202.8   | 168.1   | 184.9   | 196.2   | 204.3   | 195.4   | 198.4   | 233.6   | 0.137365352 | 188       | 207.925   | 19.925   | 0.904172177 | 0.1319   | 1.106  |
| 101186_at   | 42.2    | 39.4    | 48.4    | 64.8    | 66.4    | 45      | 50      | 56.8    | 0.456657352 | 48.7      | 54.55     | 5.85     | 0.892758937 | 0.412    | 1.13   |
| 101187_at   | 1248.9  | 1198.3  | 1291.4  | 1348.1  | 1038.2  | 734.6   | 826.7   | 994.8   | 0.007966952 | 1271.675  | 898.575   | 373.1    | 1.415212976 | 0.005631 | -1.428 |
| 101188_at   | 26.7    | 40.6    | 31.8    | 14.6    | 25.2    | 13.8    | 33.1    | 31.6    | 0.73307074  | 28.425    | 25.925    | 2.5      | 1.096432015 | 0.7917   | -1.085 |
| 101189_at   | 18.9    | 22.1    | 8.9     | 9.5     | 5.7     | 18.1    | 6.2     | 4.1     | 0.221255677 | 14.85     | 8.525     | 6.325    | 1.741935484 | 0.1539   | -1.915 |
| 101190_at   | 4.5     | 17.8    | 10.7    | 8.3     | 35.5    | 19.7    | 28.1    | 11.2    | 0.080611458 | 10.325    | 23.625    | 13.3     | 0.437037037 | 0.0649   | 2.364  |
| 101191_at   | 98.9    | 134.2   | 130.8   | 91.7    | 39.5    | 115.4   | 102.1   | 80.3    | 0.194318253 | 113.9     | 84.325    | 29.575   | 1.350726356 | 0.2108   | -1.436 |
| 101192_at   | 16.2    | 7.5     | 34.4    | 10.3    | 9.1     | 12      | 8.2     | 13.4    | 0.368795803 | 17.1      | 10.675    | 6.425    | 1.601873536 | 0.3943   | -1.377 |
| 101193_at   | 72      | 47.5    | 81.6    | 110.5   | 57      | 77.3    | 71.5    | 63.7    | 0.4903307   | 77.9      | 67.375    | 10.525   | 1.156215213 | 0.5868   | -1.114 |
| 101194_at   | 54.8    | 40.1    | 98.2    | 198.4   | 16.6    | 82.9    | 87.2    | 5.8     | 0.286757565 | 97.875    | 48.125    | 49.75    | 2.033766234 | 0.2172   | -2.798 |
| 101195_at   | 12.4    | 12.1    | 10.4    | 17.1    | 21.3    | 10.1    | 26.1    | 40.3    | 0.163691633 | 13        | 24.45     | 11.45    | 0.531697342 | 0.1342   | 1.705  |
| 101196_at   | 366.3   | 337.9   | 408.5   | 405.5   | 590.6   | 600.5   | 692.8   | 717.3   | 0.001020251 | 379.55    | 650.3     | 270.75   | 0.583653698 | 0.000198 | 1.712  |
| 101197_at   | 5.8     | 4.6     | 7.1     | 5.7     | 12      | 6.3     | 4.8     | 7.1     | 0.351515065 | 5.8       | 7.55      | 1.75     | 0.768211921 | 0.336    | 1.245  |
| 101198_at   | 49.3    | 67      | 56.8    | 65.2    | 70.9    | 57.4    | 65.2    | 68.2    | 0.292343936 | 59.575    | 65.425    | 5.85     | 0.910584639 | 0.2895   | -1.103 |
| 101199_at   | 11.8    | 40.7    | 30.2    | 11.2    | 8.5     | 12.5    | 35.6    | 7       | 0.470921949 | 23.475    | 15.9      | 7.575    | 1.476415094 | 0.3875   | -1.578 |
| 101200_at   | 7.9     | 7.5     | 4.1     | 4.3     | 8.5     | 5.2     | 6.5     | 24.7    | 0.332685055 | 5.95      | 11.225    | 5.275    | 0.530066815 | 0.2618   | 1.618  |
| 101201_r_at | 11.8    | 1.2     | 1       | 1.2     | 2.5     | 1.2     | 1.8     | 1.2     | 0.485099528 | 3.8       | 1.675     | 2.125    | 2.268656716 | 0.689    | -1.295 |
| 101202_at   | 13.8    | 9       | 8.3     | 4.4     | 11.3    | 5.5     | 4.7     | 12.2    | 0.874584218 | 8.875     | 8.425     | 0.45     | 1.053412463 | 0.8732   | -1.058 |
| 101203_r_at | 4.1     | 2       | 3.7     | 2.3     | 17.6    | 5.7     | 1.5     | 1.5     | 0.421306014 | 3.025     | 6.575     | 3.55     | 0.460076046 | 0.6665   | 1.326  |
| 101204_at   | 7.2     | 7       | 7.8     | 8.6     | 11.5    | 7.4     | 9.1     | 12.1    | 0.113827684 | 7.65      | 10.025    | 2.375    | 0.763092269 | 0.08639  | 1.287  |
| 101205_at   | 1.6     | 1.7     | 13.2    | 1.3     | 4.6     | 2.8     | 13.8    | 2.3     | 0.73181376  | 4.45      | 5.875     | 1.425    | 0.757446809 | 0.4456   | 1.742  |
| 101206_at   | 6.4     | 20.6    | 25.1    | 10.6    | 23.2    | 10.1    | 35      | 21.7    | 0.347532157 | 15.675    | 22.5      | 6.825    | 0.696666667 | 0.3578   | 1.5    |
| 101207_at   | 18951.9 | 19032.3 | 19780.1 | 15923.8 | 28660   | 17062.1 | 21948.2 | 15857.8 | 0.468333837 | 18422.025 | 20882.025 | 2460     | 0.882195333 | 0.5054   | -1.106 |
| 101208_at   | 7.7     | 24.9    | 15.8    | 26.1    | 11.2    | 12.8    | 16.1    | 5.6     | 0.203373657 | 18.625    | 11.425    | 7.2      | 1.630196937 | 0.26     | -1.57  |
| 101209_at   | 13.4    | 5.7     | 2.5     | 10.4    | 22.9    | 2.9     | 17.6    | 24.5    | 0.170822348 | 8         | 16.975    | 8.975    | 0.471281296 | 0.3308   | 1.937  |
| 101210_at   | 219.4   | 303.8   | 241.9   | 230.2   | 189.9   | 319.4   | 208.5   | 333.9   | 0.750245002 | 248.825   | 262.925   | 14.1     | 0.94637254  | 0.8489   | -1.033 |
| 101211_at   | 6       | 3.5     | 9.4     | 2.2     | 7.7     | 3.6     | 4       | 6.9     | 0.889761444 | 5.275     | 5.55      | 0.275    | 0.95045045  | 0.7072   | 1.157  |
| 101212_at   | 15147.6 | 16064.5 | 15519.5 | 13500.6 | 25583.9 | 14401.3 | 18317.7 | 13975.4 | 0.347070946 | 15058.05  | 18069.575 | 3011.525 | 0.833337253 | 0.3293   | 1.166  |
| 101213_at   | 20171.5 | 23186.1 | 21823.6 | 18495.6 | 37055.7 | 18390.2 | 25316   | 20294.4 | 0.380998474 | 20919.2   | 25264.075 | 4344.875 | 0.828021608 | 0.3799   | 1.167  |
| 101214_f_at | 8019.7  | 6070.7  | 7768.6  | 7024.6  | 8795.7  | 6633.3  | 8082.6  | 6311.1  | 0.760970625 | 7220.9    | 7455.675  | 234.775  | 0.968510564 | 0.7879   | -1.029 |
| 101215_at   | 5.9     | 8       | 14      | 15.8    | 8.3     | 12.7    | 9.2     | 15.2    | 0.887074591 | 10.925    | 11.35     | 0.425    | 0.962555066 | 0.7669   | -1.088 |
| 101216_at   | 65.2    | 27.1    | 50.5    | 83.2    | 88.3    | 79.1    | 44.6    | 117.1   | 0.227776489 | 56.5      | 82.275    | 25.775   | 0.686721361 | 0.2526   | 1.49   |
| 101217_at   | 96.2    | 68.4    | 82.5    | 104.4   | 58.5    | 98.2    | 98      | 139     | 0.591769671 | 87.875    | 98.425    | 10.55    | 0.892811786 | 0.7026   | -1.084 |
| 101218_at   | 112.6   | 92.8    | 125.1   | 79.5    | 95.4    | 93      | 57.9    | 55.7    | 0.118759686 | 102.5     | 75.5      | 27       | 1.357615894 | 0.1196   | -1.381 |
| 101219_at   | 18.8    | 23.7    | 60.4    | 27      | 33.1    | 27.9    | 27.9    | 24.5    | 0.695360768 | 32.475    | 28.35     | 4.125    | 1.145502646 | 0.899    | -1.035 |
| 101220_at   | 31      | 41      | 31.9    | 24.8    | 22.2    | 50      | 50.4    | 43.4    | 0.271239653 | 32.175    | 41.5      | 9.325    | 0.775301205 | 0.3524   | 1.248  |
| 101221_at   | 259.9   | 207.4   | 246.9   | 231.5   | 243.3   | 200.9   | 243.1   | 246.5   | 0.855713347 | 236.425   | 233.45    | 2.975    | 1.012743628 | 0.8594   | -1.013 |
| 101222_f_at | 317.8   | 232.7   | 268.2   | 252.9   | 301.3   | 377.3   | 321.2   | 272.7   | 0.131388542 | 267.9     | 318.125   | 50.225   | 0.842121807 | 0.1207   | 1.187  |
| 101223_r_at | 4.4     | 6.2     | 2.6     | 12.3    | 14.8    | 2.3     | 3.7     | 14.4    | 0.567574697 | 6.375     | 8.8       | 2.425    | 0.724431818 | 0.7515   | 1.211  |
| 101224_at   | 11.8    | 5.6     | 10.1    | 9.5     | 9.9     | 9.3     | 58.1    | 7.5     | 0.404186739 | 9.25      | 21.2      | 11.95    | 0.436320755 | 0.3909   | 1.588  |
| 101225_at   | 152.2   | 102.6   | 128.5   | 135.7   | 155.4   | 140     | 109.8   | 141.6   | 0.639720443 | 129.75    | 136.7     | 6.95     | 0.949158742 | 0.6431   | -1.056 |
| 101226_at   | 188.4   | 130.5   | 162.9   | 159.4   | 159.1   | 173.7   | 158.6   | 220.6   | 0.384850135 | 160.3     | 178       | 17.7     | 0.900561798 | 0.3742   | 1.109  |
| 101227_at   | 9.7     | 29.2    | 51.6    | 32.1    | 50.4    | 26.4    | 14.2    | 74.5    | 0.528598775 | 30.65     | 41.375    | 10.725   | 0.740785498 | 0.6085   | 1.315  |
| 101228_at   | 12.6    | 41.4    | 35.3    | 124     | 50.2    | 14.4    | 10      | 51.5    | 0.459590025 | 53.325    | 31.525    | 21.8     | 1.691514671 | 0.4992   | -1.575 |
| 101229_at   | 17.8    | 28.2    | 84.1    | 62.3    | 20.2    | 49.7    | 45.1    | 15.8    | 0.422666653 | 48.1      | 32.7      | 15.4     | 1.470948012 | 0.5037   | -1.384 |



|             |         |         |         |         |         |         |         |         |             |           |           |         |             |          |        |
|-------------|---------|---------|---------|---------|---------|---------|---------|---------|-------------|-----------|-----------|---------|-------------|----------|--------|
| 101230_at   | 4.9     | 6.4     | 36.9    | 18.7    | 23.8    | 8.7     | 10.7    | 15.2    | 0.806078969 | 16.725    | 14.6      | 2.125   | 1.145547945 | 0.8354   | -1.119 |
| 101231_at   | 33.4    | 32.4    | 37.4    | 35.2    | 9.4     | 16.1    | 22.1    | 33.1    | 0.060996945 | 34.6      | 20.175    | 14.425  | 1.714993804 | 0.05439  | -1.894 |
| 101232_at   | 1.6     | 2.9     | 6.5     | 7.9     | 24.5    | 6.9     | 3.3     | 2.9     | 0.435960903 | 4.725     | 9.4       | 4.675   | 0.502659574 | 0.4603   | 1.627  |
| 101233_at   | 29.8    | 27.3    | 24.1    | 25.2    | 31.9    | 37.7    | 30      | 35      | 0.017718864 | 26.6      | 33.65     | 7.05    | 0.790490342 | 0.0146   | 1.265  |
| 101234_at   | 52.2    | 32.4    | 47      | 100     | 29.4    | 16.2    | 13.2    | 74.9    | 0.276443779 | 57.9      | 33.425    | 24.475  | 1.73223635  | 0.1709   | -2.027 |
| 101235_f_at | 48      | 37      | 53.3    | 70.1    | 32.3    | 42.5    | 38.2    | 48.2    | 0.19307346  | 52.1      | 40.3      | 11.8    | 1.29280397  | 0.1741   | -1.274 |
| 101254_at   | 12521.8 | 12506.2 | 12899.5 | 11139.1 | 15932   | 10796.8 | 12667.7 | 10766   | 0.84144667  | 12266.65  | 12540.625 | 273.975 | 0.978153003 | 0.9189   | -1.01  |
| 101255_at   | 20260.5 | 23056   | 23043.9 | 18473.1 | 39159.7 | 18935.1 | 26739.6 | 20428.1 | 0.352413881 | 21208.375 | 26315.625 | 5107.25 | 0.805923287 | 0.3432   | 1.195  |
| 101276_at   | 3.3     | 2.8     | 3.6     | 3.5     | 5.4     | 3.7     | 3.7     | 24.3    | 0.319964269 | 3.3       | 9.275     | 5.975   | 0.355795148 | 0.1868   | 1.963  |
| 101277_at   | 36.6    | 34.4    | 48.5    | 41.1    | 34      | 23.4    | 41.3    | 37.4    | 0.263680025 | 40.15     | 34.025    | 6.125   | 1.180014695 | 0.2673   | -1.195 |
| 101278_at   | 37.8    | 14.9    | 45.4    | 45.1    | 55.3    | 108.3   | 122.6   | 95.5    | 0.017812835 | 35.8      | 95.425    | 59.625  | 0.375163741 | 0.01809  | 2.79   |
| 101279_f_at | 46.8    | 34.9    | 64.2    | 63.1    | 39.4    | 26.6    | 7.3     | 49.2    | 0.110888564 | 52.25     | 30.625    | 21.625  | 1.706122449 | 0.1629   | -2.047 |
| 101280_at   | 38.8    | 35      | 42.7    | 33.7    | 48.1    | 39.4    | 43.3    | 39.6    | 0.129839714 | 37.55     | 42.6      | 5.05    | 0.881455399 | 0.1263   | 1.135  |
| 101281_at   | 10.3    | 56.1    | 51.5    | 48.4    | 78.2    | 54.4    | 52.9    | 33.7    | 0.380021666 | 41.575    | 54.8      | 13.225  | 0.758667883 | 0.382    | 1.515  |
| 101282_at   | 345     | 352.3   | 405.9   | 356.9   | 511.1   | 286.4   | 411.9   | 420.8   | 0.433645052 | 365.025   | 407.55    | 42.525  | 0.895656975 | 0.4966   | -1.096 |
| 101286_at   | 9.2     | 80.6    | 31.7    | 12.1    | 20.6    | 17.3    | 57.6    | 50      | 0.884151899 | 33.4      | 36.375    | 2.975   | 0.918213058 | 0.5999   | 1.38   |
| 101287_s_at | 8.2     | 6.8     | 14.5    | 14.9    | 6       | 5.7     | 7.7     | 13.5    | 0.340741667 | 11.1      | 8.225     | 2.875   | 1.349544073 | 0.326    | -1.352 |
| 101288_at   | 10.9    | 40.1    | 12.8    | 53.3    | 16      | 15      | 11.5    | 30.9    | 0.387443871 | 29.275    | 18.35     | 10.925  | 1.595367847 | 0.5148   | -1.367 |
| 101289_f_at | 27.5    | 21.9    | 36.6    | 12.6    | 100     | 45.9    | 59.8    | 97.6    | 0.026142868 | 24.65     | 75.825    | 51.175  | 0.325090669 | 0.008368 | 3.131  |
| 101290_at   | 116     | 134.8   | 88.9    | 99.1    | 141.2   | 84.8    | 112.3   | 159     | 0.479927361 | 109.7     | 124.325   | 14.625  | 0.88236477  | 0.5329   | 1.116  |
| 101291_at   | 65.9    | 80.9    | 133.1   | 70.9    | 90.2    | 116.6   | 122.5   | 67      | 0.591919077 | 87.7      | 99.075    | 11.375  | 0.885187989 | 0.5445   | 1.145  |
| 101292_f_at | 647.3   | 623.1   | 566.8   | 574.4   | 625.5   | 534.4   | 684.2   | 649.2   | 0.608721223 | 602.9     | 623.325   | 20.425  | 0.967232182 | 0.639    | -1.031 |
| 101293_at   | 54.3    | 3.5     | 37.1    | 40.4    | 70.7    | 11.2    | 38.8    | 30.7    | 0.814643775 | 33.825    | 37.85     | 4.025   | 0.893659181 | 0.702    | 1.346  |
| 101294_g_at | 984     | 887.7   | 996.8   | 914.9   | 871.9   | 892.6   | 769.7   | 776.1   | 0.030061504 | 945.85    | 827.575   | 118.275 | 1.14291756  | 0.03009  | -1.144 |
| 101295_s_at | 585.8   | 323.2   | 300.2   | 653.6   | 418.4   | 333.8   | 379.1   | 445.2   | 0.492384677 | 465.7     | 394.125   | 71.575  | 1.181604821 | 0.6068   | -1.121 |
| 101296_at   | 0.8     | 3       | 7.1     | 1.3     | 10.8    | 1.1     | 16.6    | 1.6     | 0.330327885 | 3.05      | 7.525     | 4.475   | 0.405315615 | 0.4593   | 1.927  |
| 101297_at   | 1.9     | 1.7     | 1.3     | 1.9     | 3.2     | 1.4     | 1.3     | 1.4     | 0.808971516 | 1.7       | 1.825     | 0.125   | 0.931506849 | 0.9743   | -1.008 |
| 101298_g_at | 27.8    | 10.4    | 12.2    | 21.8    | 13.5    | 8.4     | 18.4    | 27.9    | 0.869603061 | 18.05     | 17.05     | 1       | 1.058651026 | 0.8451   | -1.073 |
| 101299_at   | 21.7    | 8.3     | 7.7     | 26.4    | 19      | 18.4    | 57.8    | 14.1    | 0.369478982 | 16.025    | 27.325    | 11.3    | 0.586459286 | 0.2965   | 1.667  |
| 101300_at   | 94.3    | 114.5   | 186.9   | 126.5   | 151.9   | 152.9   | 121.4   | 146.8   | 0.58383526  | 130.55    | 143.25    | 12.7    | 0.911343805 | 0.463    | 1.128  |
| 101301_at   | 161.4   | 206.1   | 222.2   | 128.4   | 179     | 175     | 163.1   | 186.4   | 0.877286722 | 179.525   | 175.875   | 3.65    | 1.020753376 | 0.9954   | -1.001 |
| 101302_at   | 52.7    | 17.8    | 25.8    | 60.3    | 35.5    | 62.2    | 27      | 122.6   | 0.393392164 | 39.15     | 61.825    | 22.675  | 0.633238981 | 0.3986   | 1.495  |
| 101303_at   | 70.3    | 43.1    | 80      | 51.9    | 126.2   | 68.6    | 31.4    | 65.4    | 0.616640949 | 61.325    | 72.9      | 11.575  | 0.84122085  | 0.7943   | -1.09  |
| 101305_at   | 30.2    | 24.8    | 84.5    | 53.3    | 61.6    | 18      | 17.1    | 45.4    | 0.495372489 | 48.2      | 35.525    | 12.675  | 1.356790992 | 0.4548   | -1.407 |
| 101306_f_at | 8.1     | 7.3     | 8.9     | 10.4    | 11.4    | 9.1     | 12.5    | 8.3     | 0.218358769 | 8.675     | 10.325    | 1.65    | 0.840193705 | 0.2129   | 1.183  |
| 101307_at   | 40.8    | 38      | 42.4    | 47.4    | 57.7    | 41.9    | 50.3    | 51.4    | 0.084626728 | 42.15     | 50.325    | 8.175   | 0.837555887 | 0.07371  | 1.19   |
| 101308_at   | 8.5     | 14.6    | 15.2    | 10.3    | 9.3     | 54.3    | 17.3    | 18.4    | 0.296847176 | 12.15     | 24.825    | 12.675  | 0.489425982 | 0.2276   | 1.695  |
| 101309_at   | 21.2    | 23.7    | 20.9    | 19.4    | 20.1    | 20.9    | 25.7    | 17.1    | 0.868344461 | 21.3      | 20.95     | 0.35    | 1.016706444 | 0.7916   | -1.026 |
| 101310_at   | 20.7    | 18.1    | 11.4    | 17.4    | 11.9    | 13.8    | 33.1    | 10.4    | 0.94725699  | 16.9      | 17.3      | 0.4     | 0.976878613 | 0.8286   | -1.068 |
| 101311_at   | 15.3    | 14.8    | 13.3    | 11.4    | 6.8     | 15.6    | 9.9     | 46.9    | 0.556209703 | 13.7      | 19.8      | 6.1     | 0.691919192 | 0.837    | -1.095 |
| 101312_at   | 44.4    | 13.9    | 56.2    | 52.1    | 12.1    | 11.9    | 12      | 14.9    | 0.056179055 | 41.65     | 12.725    | 28.925  | 3.273084479 | 0.01871  | -2.888 |
| 101313_r_at | 36      | 30.4    | 27      | 23      | 38.8    | 66.2    | 57.8    | 27.3    | 0.126028269 | 29.1      | 47.525    | 18.425  | 0.612309311 | 0.09116  | 1.562  |
| 101314_at   | 21.7    | 21.1    | 79.1    | 24.7    | 21.2    | 23      | 28.2    | 22.6    | 0.430800683 | 36.65     | 23.75     | 12.9    | 1.543157895 | 0.4439   | -1.303 |
| 101315_at   | 38.7    | 28.5    | 26.3    | 31.6    | 51.1    | 64.5    | 57      | 58.3    | 0.000472565 | 31.275    | 57.725    | 26.45   | 0.541792984 | 0.000663 | 1.859  |
| 101316_at   | 8.1     | 11.3    | 8.5     | 17.1    | 8.3     | 10.3    | 8.4     | 12.9    | 0.611556515 | 11.25     | 9.975     | 1.275   | 1.127819549 | 0.6572   | -1.098 |
| 101317_f_at | 111.2   | 113     | 91      | 118.1   | 169.5   | 127.8   | 144.7   | 106.2   | 0.118939187 | 108.325   | 137.05    | 28.725  | 0.790404962 | 0.09643  | 1.253  |
| 101318_at   | 4       | 3.8     | 4.8     | 7.4     | 5.8     | 4.8     | 6.8     | 3.9     | 0.765722477 | 5         | 5.325     | 0.325   | 0.938967136 | 0.6916   | -1.084 |
| 101319_f_at | 18.9    | 8       | 12.2    | 41.1    | 7.6     | 44.7    | 26.7    | 17.1    | 0.725894778 | 20.05     | 24.025    | 3.975   | 0.834547347 | 0.7404   | 1.194  |
| 101320_f_at | 5.3     | 28.5    | 16.2    | 21.3    | 48.9    | 10      | 6.5     | 32.1    | 0.583645855 | 17.825    | 24.375    | 6.55    | 0.731282051 | 0.7916   | 1.181  |
| 101321_r_at | 3.9     | 12.4    | 12.6    | 6.2     | 23.4    | 6.8     | 8.5     | 10.3    | 0.464646156 | 8.775     | 12.25     | 3.475   | 0.716326531 | 0.4373   | 1.387  |
| 101324_r_at | 2.1     | 34      | 4.7     | 3.9     | 13.7    | 15.5    | 16.7    | 14.3    | 0.64715474  | 11.175    | 15.05     | 3.875   | 0.742524917 | 0.182    | 2.48   |
| 101325_r_at | 60      | 71.7    | 46      | 60.2    | 35.2    | 80.6    | 69.1    | 88.9    | 0.524290219 | 59.475    | 68.45     | 8.975   | 0.868882396 | 0.693    | -1.099 |
| 101326_at   | 42.1    | 44.2    | 54.7    | 14.4    | 49.6    | 43.7    | 43      | 16.8    | 0.961074121 | 38.85     | 38.275    | 0.575   | 1.015022861 | 0.9701   | -1.015 |
| 101327_at   | 18.5    | 28.5    | 25.1    | 72.8    | 32.4    | 34.8    | 54.3    | 29.8    | 0.91159787  | 36.225    | 37.825    | 1.6     | 0.957699934 | 0.64     | 1.173  |
| 101328_at   | 438.6   | 356.4   | 402.5   | 295.1   | 346.8   | 458.5   | 194.6   | 248.2   | 0.399621985 | 373.15    | 312.025   | 61.125  | 1.195897765 | 0.3264   | -1.247 |
| 101329_f_at | 6.8     | 5.1     | 6.6     | 8.3     | 14.1    | 4.7     | 8.3     | 4.9     | 0.604417075 | 6.7       | 8         | 1.3     | 0.8375      | 0.7691   | -1.089 |



|             |       |        |        |       |        |        |        |        |             |          |          |         |             |         |        |
|-------------|-------|--------|--------|-------|--------|--------|--------|--------|-------------|----------|----------|---------|-------------|---------|--------|
| 101330_f_at | 49.9  | 31.6   | 43.1   | 48.3  | 15.9   | 29     | 26     | 10.3   | 0.00884108  | 43.225   | 20.3     | 22.925  | 2.129310345 | 0.01993 | -2.269 |
| 101331_f_at | 8.2   | 3.6    | 3.5    | 3.3   | 3.6    | 4.4    | 2.6    | 6.3    | 0.77639666  | 4.65     | 4.225    | 0.425   | 1.100591716 | 0.8274  | -1.068 |
| 101332_at   | 27.8  | 27.2   | 16.9   | 20.5  | 32.5   | 23.2   | 49.1   | 19.1   | 0.334653715 | 23.1     | 30.975   | 7.875   | 0.745762712 | 0.3391  | 1.282  |
| 101333_at   | 72.4  | 124.6  | 135.4  | 164.2 | 98.5   | 120.8  | 130.9  | 171.6  | 0.806243358 | 124.15   | 130.45   | 6.3     | 0.951705634 | 0.7438  | -1.074 |
| 101334_at   | 17    | 51     | 45.9   | 14.5  | 13.5   | 43.1   | 64.3   | 19.9   | 0.843348391 | 32.1     | 35.2     | 3.1     | 0.911931818 | 0.9001  | -1.065 |
| 101335_at   | 61.8  | 53.3   | 78.4   | 15.6  | 83.3   | 48.3   | 35.3   | 10.9   | 0.710834147 | 52.275   | 44.45    | 7.825   | 1.176040495 | 0.6833  | -1.272 |
| 101336_at   | 86.3  | 32.2   | 47.4   | 54    | 136.1  | 27.1   | 24.4   | 18.8   | 0.917099919 | 54.975   | 51.6     | 3.375   | 1.065406977 | 0.4944  | -1.431 |
| 101337_at   | 16.6  | 10.3   | 9.2    | 9.2   | 24.3   | 8.8    | 14.6   | 30.5   | 0.190558567 | 11.325   | 19.55    | 8.225   | 0.579283887 | 0.1824  | 1.596  |
| 101338_f_at | 54    | 145.3  | 229.7  | 95    | 85.8   | 185    | 225.5  | 151.7  | 0.543610642 | 131      | 162      | 31      | 0.808641975 | 0.4677  | 1.335  |
| 101339_at   | 65.9  | 83.8   | 69.8   | 64.1  | 40.5   | 28     | 80.9   | 99.3   | 0.645343895 | 70.9     | 62.175   | 8.725   | 1.140329715 | 0.4391  | -1.284 |
| 101340_at   | 8.5   | 15     | 11.2   | 14    | 11     | 9      | 8.2    | 15.2   | 0.559367639 | 12.175   | 10.85    | 1.325   | 1.122119816 | 0.5413  | -1.128 |
| 101341_at   | 110.2 | 144.7  | 188    | 237.9 | 123.3  | 146.5  | 185.4  | 167.6  | 0.659461306 | 170.2    | 155.7    | 14.5    | 1.09312781  | 0.7611  | -1.062 |
| 101342_at   | 36.2  | 31.3   | 87.3   | 66    | 40.3   | 37.3   | 120.4  | 51.6   | 0.771938332 | 55.2     | 62.4     | 7.2     | 0.884615385 | 0.8141  | -1.093 |
| 101343_at   | 33.1  | 70.6   | 60.4   | 49.7  | 43.2   | 46.6   | 43.5   | 66.7   | 0.737873612 | 53.45    | 50       | 3.45    | 1.069       | 0.8212  | -1.047 |
| 101344_at   | 367.2 | 343.6  | 331.5  | 389.2 | 442.4  | 373.8  | 526.7  | 308    | 0.331301702 | 357.875  | 412.725  | 54.85   | 0.867102792 | 0.339   | 1.133  |
| 101345_at   | 13.6  | 15.3   | 18.1   | 14.6  | 22     | 16.1   | 16.6   | 16.9   | 0.193173552 | 15.4     | 17.9     | 2.5     | 0.860335196 | 0.1719  | 1.159  |
| 101346_at   | 22.1  | 25.4   | 50.7   | 47    | 27.7   | 28.8   | 44.2   | 35.1   | 0.788088209 | 36.3     | 33.95    | 2.35    | 1.06921944  | 0.9354  | -1.02  |
| 101347_at   | 54.4  | 55.2   | 39.3   | 126.7 | 62.3   | 77.1   | 101.2  | 56.8   | 0.815205912 | 68.9     | 74.35    | 5.45    | 0.92669805  | 0.6052  | 1.166  |
| 101348_at   | 96.1  | 39.6   | 52.4   | 50.1  | 55.5   | 76.9   | 38.2   | 61.9   | 0.927184836 | 59.55    | 58.125   | 1.425   | 1.024516129 | 0.9922  | -1.002 |
| 101349_at   | 10.7  | 34.2   | 38.7   | 13.5  | 9.7    | 17.4   | 44.5   | 22     | 0.935190788 | 24.275   | 23.4     | 0.875   | 1.037393162 | 0.9389  | -1.037 |
| 101350_g_at | 889.3 | 1014.7 | 748.3  | 794.1 | 767.4  | 810.7  | 636.1  | 557.1  | 0.088285474 | 861.6    | 692.825  | 168.775 | 1.243604085 | 0.08854 | -1.249 |
| 101351_at   | 6.6   | 2      | 4.5    | 16.1  | 3.7    | 1.5    | 11.1   | 10     | 0.858129898 | 7.3      | 6.575    | 0.725   | 1.11026616  | 0.8759  | -1.111 |
| 101352_g_at | 73    | 61.3   | 65.2   | 52.8  | 103.7  | 61     | 97     | 72.6   | 0.133046234 | 63.075   | 83.575   | 20.5    | 0.754711337 | 0.1097  | 1.304  |
| 101353_at   | 2.2   | 0.5    | 2.1    | 1.4   | 3.8    | 3.4    | 1.2    | 0.9    | 0.402710592 | 1.55     | 2.325    | 0.775   | 0.666666667 | 0.5004  | 1.436  |
| 101354_at   | 7.8   | 15.7   | 17.3   | 5.2   | 6.6    | 4.7    | 7.4    | 10.3   | 0.253147611 | 11.5     | 7.25     | 4.25    | 1.586206897 | 0.2871  | -1.472 |
| 101355_at   | 108.3 | 106.9  | 71.7   | 99    | 158.8  | 66.3   | 163.5  | 169.5  | 0.177836387 | 96.475   | 139.525  | 43.05   | 0.691453145 | 0.2459  | 1.373  |
| 101356_at   | 141.3 | 170    | 171    | 110.5 | 193.8  | 188.1  | 141.3  | 115.3  | 0.648103691 | 148.2    | 159.625  | 11.425  | 0.928425998 | 0.6904  | -1.07  |
| 101357_at   | 176.1 | 210.7  | 154.5  | 148.6 | 170.1  | 233.4  | 189.9  | 176.5  | 0.356145497 | 172.475  | 192.475  | 20      | 0.896090401 | 0.3324  | 1.118  |
| 101358_at   | 63.7  | 102.4  | 36.4   | 104.1 | 25.5   | 91     | 95.8   | 197.8  | 0.543070358 | 76.65    | 102.525  | 25.875  | 0.747622531 | 0.7793  | 1.155  |
| 101359_at   | 185.5 | 310.1  | 190.5  | 305.8 | 332    | 318    | 403    | 309.4  | 0.071981582 | 247.975  | 340.6    | 92.625  | 0.728053435 | 0.06893 | 1.408  |
| 101362_at   | 249.7 | 257.7  | 355.1  | 312.9 | 167.6  | 287.9  | 168.8  | 154.9  | 0.049428986 | 293.85   | 194.8    | 99.05   | 1.508470226 | 0.03923 | -1.543 |
| 101363_at   | 218.8 | 225.4  | 239    | 191.3 | 255.1  | 205.4  | 232.8  | 230.1  | 0.424890559 | 218.625  | 230.85   | 12.225  | 0.947043535 | 0.4295  | -1.056 |
| 101364_at   | 15.1  | 24.2   | 22.2   | 23.3  | 16     | 21.7   | 20.8   | 24.9   | 0.903737668 | 21.2     | 20.85    | 0.35    | 1.016786571 | 0.9382  | -1.012 |
| 101366_f_at | 178.8 | 184.2  | 205.1  | 156.9 | 255.5  | 168.1  | 194.6  | 138.3  | 0.783988398 | 181.25   | 189.125  | 7.875   | 0.958360872 | 0.8818  | -1.022 |
| 101367_at   | 1046  | 1708.9 | 1339.4 | 1385  | 1267.9 | 1272.8 | 1563.9 | 1482.3 | 0.869469585 | 1369.825 | 1396.725 | 26.9    | 0.980740661 | 0.8003  | -1.031 |
| 101368_at   | 248.9 | 198.3  | 203.4  | 178.2 | 162    | 161.3  | 194.2  | 192.7  | 0.151632759 | 207.2    | 177.55   | 29.65   | 1.166995213 | 0.1334  | -1.163 |
| 101369_at   | 308.6 | 314.7  | 317.2  | 252.9 | 396.6  | 251.4  | 252.2  | 324    | 0.848490215 | 298.35   | 306.05   | 7.7     | 0.974840712 | 0.9308  | -1.011 |
| 101370_at   | 737   | 500.4  | 744.8  | 580.8 | 337.9  | 653.4  | 570.8  | 444.4  | 0.181710584 | 640.75   | 501.625  | 139.125 | 1.277348617 | 0.1845  | -1.299 |
| 101371_at   | 713.9 | 759.5  | 830.5  | 661.9 | 751.6  | 723    | 709.7  | 699.5  | 0.616749457 | 741.45   | 720.95   | 20.5    | 1.028434704 | 0.6389  | -1.025 |
| 101372_at   | 192.8 | 295.4  | 210.9  | 362.1 | 128.2  | 350.4  | 236.4  | 185.1  | 0.537280611 | 265.3    | 225.025  | 40.275  | 1.178980113 | 0.4691  | -1.22  |
| 101374_at   | 30.4  | 48.1   | 36.8   | 36.6  | 42.9   | 22     | 16.3   | 47.3   | 0.525406316 | 37.975   | 32.125   | 5.85    | 1.182101167 | 0.3986  | -1.284 |
| 101375_at   | 12.1  | 19.2   | 9.7    | 13.8  | 8.7    | 20.3   | 55.3   | 17.6   | 0.336175348 | 13.7     | 25.475   | 11.775  | 0.537782139 | 0.334   | 1.533  |
| 101376_at   | 87.5  | 89.1   | 100.3  | 105.1 | 107.9  | 78.5   | 103.4  | 150.8  | 0.408418486 | 95.5     | 110.15   | 14.65   | 0.866999546 | 0.4328  | 1.126  |
| 101377_at   | 128.1 | 137.1  | 105.6  | 111.3 | 153.6  | 109.1  | 136.1  | 177.5  | 0.21191338  | 120.525  | 144.075  | 23.55   | 0.836543467 | 0.2086  | 1.183  |
| 101380_at   | 267.7 | 327.8  | 311.1  | 292.6 | 420.6  | 253.3  | 367.4  | 293.6  | 0.442775944 | 299.8    | 333.725  | 33.925  | 0.898344445 | 0.4812  | 1.095  |
| 101381_at   | 195.7 | 223.7  | 184.9  | 250.8 | 165    | 211    | 246.6  | 152.1  | 0.476906089 | 213.775  | 193.675  | 20.1    | 1.103782109 | 0.4302  | -1.117 |
| 101382_at   | 175.5 | 243.1  | 244.7  | 222.3 | 258.4  | 210.3  | 240.8  | 336.5  | 0.25818648  | 221.4    | 261.5    | 40.1    | 0.84665392  | 0.2499  | 1.174  |
| 101383_at   | 199   | 157.1  | 206.3  | 201.2 | 167.7  | 161.9  | 229.6  | 231.8  | 0.7703441   | 190.9    | 197.75   | 6.85    | 0.965360303 | 0.8236  | -1.027 |
| 101384_at   | 23    | 37     | 67.1   | 75.1  | 91     | 23.6   | 93.7   | 97.6   | 0.279283039 | 50.55    | 76.475   | 25.925  | 0.661000327 | 0.4243  | 1.461  |
| 101385_at   | 885   | 1094.2 | 932.8  | 866.8 | 1156.1 | 850.3  | 1084.1 | 751.2  | 0.891003796 | 944.7    | 960.425  | 15.725  | 0.98362704  | 0.963   | -1.006 |
| 101386_at   | 44.1  | 27.1   | 48.9   | 64.8  | 43     | 60.5   | 42.7   | 77.9   | 0.42440693  | 46.225   | 56.025   | 9.8     | 0.82507809  | 0.4083  | 1.23   |
| 101387_at   | 456.5 | 371.8  | 420.9  | 434.8 | 504.6  | 400.6  | 380.3  | 367.8  | 0.839818197 | 421      | 413.325  | 7.675   | 1.018568923 | 0.7884  | -1.024 |
| 101388_at   | 16.7  | 8.6    | 5.5    | 19.1  | 16.5   | 9.2    | 17.9   | 26.5   | 0.333587808 | 12.475   | 17.525   | 5.05    | 0.711840228 | 0.3281  | 1.475  |
| 101389_at   | 400.3 | 365.8  | 351.3  | 382.1 | 249.1  | 298.5  | 335.2  | 311.9  | 0.016164706 | 374.875  | 298.675  | 76.2    | 1.25512681  | 0.01543 | -1.261 |
| 101390_at   | 9.5   | 25     | 28.7   | 7     | 48.2   | 20.9   | 19     | 11.3   | 0.484964292 | 17.55    | 24.85    | 7.3     | 0.706237425 | 0.444   | 1.457  |
| 101392_at   | 310.2 | 493.5  | 431.7  | 423.3 | 357.1  | 510.1  | 445.6  | 448.1  | 0.624698347 | 414.675  | 440.225  | 25.55   | 0.941961497 | 0.6134  | -1.068 |



|             |        |        |        |        |        |        |        |        |             |          |          |         |             |          |        |
|-------------|--------|--------|--------|--------|--------|--------|--------|--------|-------------|----------|----------|---------|-------------|----------|--------|
| 101393_at   | 931.8  | 760.1  | 792.5  | 685.5  | 651    | 871.5  | 924.6  | 572.2  | 0.720464653 | 792.475  | 754.825  | 37.65   | 1.049879111 | 0.6536   | -1.064 |
| 101394_at   | 15.9   | 6.8    | 25.1   | 27.5   | 43.7   | 18.8   | 35.9   | 33.4   | 0.091565233 | 18.825   | 32.95    | 14.125  | 0.571320182 | 0.129    | 1.907  |
| 101395_at   | 149    | 146.4  | 225.4  | 149.9  | 136.2  | 137.9  | 170.3  | 170.4  | 0.548457648 | 167.675  | 153.7    | 13.975  | 1.090923878 | 0.5594   | -1.078 |
| 101396_at   | 25.6   | 4.1    | 4.6    | 12.1   | 24.9   | 8.5    | 3.1    | 10.6   | 0.980417471 | 11.6     | 11.775   | 0.175   | 0.985138004 | 0.9443   | -1.045 |
| 101397_at   | 218    | 260.7  | 309.8  | 234.6  | 301.1  | 279.5  | 270.6  | 245.2  | 0.465673343 | 255.775  | 274.1    | 18.325  | 0.933144838 | 0.4213   | -1.078 |
| 101398_at   | 486.1  | 496    | 593    | 520.2  | 535.1  | 547.9  | 587.2  | 528.7  | 0.392425527 | 523.825  | 549.725  | 25.9    | 0.952885534 | 0.3552   | -1.052 |
| 101399_at   | 353.1  | 601.6  | 423.9  | 512.2  | 787.4  | 433    | 424.4  | 645.1  | 0.378093797 | 472.7    | 572.475  | 99.775  | 0.825712913 | 0.3919   | 1.193  |
| 101401_at   | 348.7  | 208.5  | 213.4  | 257.8  | 174.3  | 239.9  | 225.9  | 213.1  | 0.282399811 | 257.1    | 213.3    | 43.8    | 1.205344585 | 0.2586   | -1.187 |
| 101402_at   | 870    | 890.3  | 963.6  | 949.3  | 778.6  | 945.9  | 857.6  | 982.7  | 0.621468139 | 918.3    | 891.2    | 27.1    | 1.030408438 | 0.5877   | -1.034 |
| 101403_at   | 40.4   | 44.8   | 21.1   | 18.1   | 33.5   | 37.6   | 31.8   | 27.7   | 0.837652425 | 31.1     | 32.65    | 1.55    | 0.952526799 | 0.6324   | 1.127  |
| 101404_at   | 146.8  | 123.9  | 152    | 169.5  | 209.2  | 142.6  | 212.2  | 183.3  | 0.094103235 | 148.05   | 186.825  | 38.775  | 0.79245283  | 0.09062  | 1.255  |
| 101405_at   | 206.6  | 403.3  | 301.2  | 332.6  | 289.8  | 375.4  | 358.8  | 218.8  | 0.996829566 | 310.925  | 310.7    | 0.225   | 1.000724171 | 0.9769   | -1.006 |
| 101406_at   | 72     | 76.3   | 72.1   | 66.4   | 105.8  | 56.6   | 110    | 98.9   | 0.183730449 | 71.7     | 92.825   | 21.125  | 0.772421223 | 0.2007   | 1.255  |
| 101407_at   | 265.5  | 404.3  | 262.6  | 233.3  | 306.4  | 242.4  | 281.8  | 281.4  | 0.758403036 | 291.425  | 278      | 13.425  | 1.048291367 | 0.8388   | -1.028 |
| 101408_at   | 1664.8 | 1590.7 | 1314.5 | 1579.5 | 1412.1 | 973.5  | 1157.5 | 1434.9 | 0.077131815 | 1537.375 | 1244.5   | 292.875 | 1.235335476 | 0.08268  | -1.246 |
| 101409_at   | 629.4  | 601.4  | 553.8  | 500.1  | 530.6  | 553.9  | 521.1  | 465.1  | 0.174545211 | 571.175  | 517.675  | 53.5    | 1.103346694 | 0.1746   | -1.101 |
| 101410_at   | 37.3   | 23.2   | 48.1   | 75.8   | 53.1   | 40.4   | 79.6   | 107.5  | 0.246985548 | 46.1     | 70.15    | 24.05   | 0.657163222 | 0.2294   | 1.552  |
| 101412_at   | 920.9  | 584.6  | 890.5  | 662.8  | 250.4  | 452.3  | 346.7  | 370.1  | 0.009327218 | 764.7    | 354.875  | 409.825 | 2.154843255 | 0.003493 | -2.162 |
| 101413_at   | 36     | 24.2   | 22.3   | 31.5   | 39.1   | 22.4   | 23.3   | 37.1   | 0.730940071 | 28.5     | 30.475   | 1.975   | 0.935192781 | 0.783    | -1.055 |
| 101414_at   | 194.5  | 323.9  | 259.5  | 242.5  | 216.9  | 243.9  | 219.9  | 227.8  | 0.376382688 | 255.1    | 227.125  | 27.975  | 1.123170061 | 0.3891   | -1.106 |
| 101415_i_at | 69.9   | 64.6   | 59.5   | 47.1   | 58.1   | 63.1   | 49     | 38.2   | 0.308140987 | 60.275   | 52.1     | 8.175   | 1.156909789 | 0.3145   | -1.166 |
| 101416_f_at | 486.7  | 474.3  | 477.8  | 538    | 556.1  | 508.7  | 518.9  | 554.5  | 0.081853664 | 494.2    | 534.55   | 40.35   | 0.924515948 | 0.07721  | -1.082 |
| 101417_at   | 38.2   | 19.6   | 39.7   | 34.1   | 9.6    | 28.9   | 24.7   | 10.8   | 0.075159018 | 32.9     | 18.5     | 14.4    | 1.778378378 | 0.09176  | -1.923 |
| 101419_at   | 165.8  | 178.2  | 317.2  | 214    | 189    | 234.6  | 176.7  | 221.3  | 0.735445649 | 218.8    | 205.4    | 13.4    | 1.065238559 | 0.8264   | -1.037 |
| 101420_at   | 6.8    | 4.5    | 8.4    | 13.6   | 5.6    | 15     | 6.7    | 32.6   | 0.372510824 | 8.325    | 14.975   | 6.65    | 0.555926544 | 0.4058   | 1.515  |
| 101421_at   | 1385.8 | 1102.5 | 1173.3 | 1063.8 | 941.7  | 1060.6 | 989.4  | 1006.4 | 0.080101116 | 1181.35  | 999.525  | 181.825 | 1.181911408 | 0.04267  | -1.177 |
| 101422_at   | 336.1  | 466.2  | 436.9  | 453.4  | 283.4  | 489.9  | 342.4  | 534    | 0.878779425 | 423.15   | 412.425  | 10.725  | 1.026004728 | 0.774    | -1.052 |
| 101423_at   | 443.5  | 291.9  | 299.3  | 307.2  | 291.1  | 334.7  | 232.2  | 308.5  | 0.34688176  | 335.475  | 291.625  | 43.85   | 1.150364338 | 0.3311   | -1.143 |
| 101424_at   | 167.3  | 108.3  | 96.7   | 136.5  | 140.3  | 149.3  | 163.9  | 104.4  | 0.567041648 | 127.2    | 139.475  | 12.275  | 0.911991396 | 0.5419   | -1.106 |
| 101425_at   | 157.3  | 446.5  | 442.1  | 439.4  | 454.1  | 369.1  | 494    | 469.9  | 0.380998335 | 371.325  | 446.775  | 75.45   | 0.831123049 | 0.3637   | 1.299  |
| 101426_at   | 279.9  | 443.8  | 395.1  | 369    | 275.8  | 363.5  | 349.6  | 294.1  | 0.260769858 | 371.95   | 320.75   | 51.2    | 1.159625877 | 0.279    | -1.151 |
| 101428_at   | 13.5   | 14.2   | 56.9   | 19.5   | 16.6   | 15.4   | 17.7   | 50     | 0.937052026 | 26.025   | 24.925   | 1.1     | 1.044132397 | 0.9728   | -1.016 |
| 101429_at   | 328.2  | 322    | 303.9  | 239.2  | 348.3  | 321.1  | 380.1  | 358.2  | 0.074676836 | 298.325  | 351.925  | 53.6    | 0.847694821 | 0.0792   | 1.186  |
| 101430_at   | 971.2  | 1688   | 1324.6 | 1325   | 1345.9 | 1513.8 | 1296.5 | 1676   | 0.476839646 | 1327.2   | 1458.05  | 130.85  | 0.91025685  | 0.4304   | 1.114  |
| 101431_at   | 35.8   | 33.5   | 30.2   | 32.2   | 55.7   | 34.3   | 45.3   | 43.9   | 0.068862902 | 32.925   | 44.8     | 11.875  | 0.734933036 | 0.03101  | 1.343  |
| 101432_at   | 212.8  | 323.1  | 280.9  | 244.2  | 297.6  | 373.6  | 359.6  | 320.4  | 0.052872173 | 265.25   | 337.8    | 72.55   | 0.785227946 | 0.05313  | 1.284  |
| 101433_at   | 379.6  | 230.3  | 297.6  | 265.6  | 216.2  | 308.7  | 259    | 254.8  | 0.407592772 | 293.275  | 259.675  | 33.6    | 1.12939251  | 0.414    | -1.119 |
| 101435_at   | 62.2   | 81.6   | 105.8  | 133.7  | 65.1   | 88.5   | 68.3   | 105.3  | 0.473474667 | 95.825   | 81.8     | 14.025  | 1.171454768 | 0.52     | -1.146 |
| 101436_at   | 4.1    | 4.2    | 5.2    | 9.5    | 4.2    | 4      | 4.5    | 3.1    | 0.254397639 | 5.75     | 3.95     | 1.8     | 1.455696203 | 0.1863   | -1.37  |
| 101437_at   | 292.2  | 183.2  | 235.3  | 240    | 219.5  | 283.8  | 230.4  | 191.6  | 0.83669222  | 237.675  | 231.325  | 6.35    | 1.027450557 | 0.8571   | -1.024 |
| 101439_at   | 749.4  | 558.1  | 671.5  | 583.5  | 673.4  | 650    | 692.6  | 491.8  | 0.836203145 | 640.625  | 626.95   | 13.675  | 1.021811947 | 0.8268   | -1.024 |
| 101440_at   | 219.3  | 238.6  | 267.8  | 225.6  | 263.1  | 239.4  | 213.4  | 316.4  | 0.450113659 | 237.825  | 258.075  | 20.25   | 0.921534438 | 0.4611   | -1.077 |
| 101441_i_at | 186.3  | 244.6  | 156.9  | 152.5  | 247.5  | 312.3  | 235.1  | 407.1  | 0.053343883 | 185.075  | 300.5    | 115.425 | 0.615890183 | 0.02788  | 1.614  |
| 101442_f_at | 39.3   | 70     | 22.7   | 36.9   | 111.7  | 74.6   | 101.7  | 63.6   | 0.023321541 | 42.225   | 87.9     | 45.675  | 0.480375427 | 0.02511  | 2.199  |
| 101443_at   | 48.4   | 42.4   | 53.8   | 58.6   | 29.6   | 41.8   | 52.3   | 68     | 0.761528862 | 50.8     | 47.925   | 2.875   | 1.059989567 | 0.6304   | -1.101 |
| 101444_at   | 1067.9 | 842    | 852    | 830.4  | 741.7  | 831.9  | 868.4  | 840.8  | 0.282384432 | 898.075  | 820.7    | 77.375  | 1.094279274 | 0.2577   | -1.09  |
| 101445_at   | 1640.3 | 1884   | 1775.7 | 1941.1 | 1310.9 | 1577.1 | 1606.9 | 1738.5 | 0.068277315 | 1810.275 | 1558.35  | 251.925 | 1.161661373 | 0.0726   | -1.165 |
| 101446_at   | 1040.7 | 711.6  | 869.7  | 824.2  | 1216.1 | 1004.4 | 1064.2 | 1058.7 | 0.039321438 | 861.55   | 1085.85  | 224.3   | 0.793433716 | 0.03594  | 1.269  |
| 101447_at   | 360.3  | 291.3  | 369.2  | 301.6  | 268.2  | 340.9  | 286.3  | 359.1  | 0.584948462 | 330.6    | 313.625  | 16.975  | 1.054125149 | 0.5762   | -1.056 |
| 101448_at   | 1242.6 | 1345.6 | 1710.9 | 1420.5 | 1628.1 | 1560.1 | 1917.7 | 1397   | 0.234465634 | 1429.9   | 1625.725 | 195.825 | 0.879546049 | 0.2218   | 1.138  |
| 101449_at   | 300.1  | 474.9  | 388.7  | 526.4  | 380    | 521.4  | 416.5  | 579.5  | 0.473860707 | 422.525  | 474.35   | 51.825  | 0.89074523  | 0.4631   | 1.132  |
| 101450_at   | 134.6  | 222.2  | 235.9  | 227.5  | 325.7  | 238.6  | 312.8  | 246.4  | 0.058837135 | 205.05   | 280.875  | 75.825  | 0.730040053 | 0.07795  | 1.39   |
| 101451_at   | 3008.2 | 2282.3 | 2236.4 | 3602.5 | 2117.1 | 2953   | 2172.6 | 5020.6 | 0.724370347 | 2782.35  | 3065.825 | 283.475 | 0.907537123 | 0.8286   | -1.054 |
| 101453_at   | 80.7   | 71.7   | 107.5  | 81.8   | 65     | 91     | 93.7   | 92.9   | 0.983356583 | 85.425   | 85.65    | 0.225   | 0.99737303  | 0.9814   | -1.003 |
| 101455_at   | 258.1  | 164.4  | 210.7  | 214.5  | 143.5  | 190.7  | 130.1  | 194.8  | 0.111802352 | 211.925  | 164.775  | 47.15   | 1.286147777 | 0.1137   | -1.289 |
| 101456_at   | 429.1  | 465.4  | 540.1  | 453.3  | 429.8  | 549.8  | 351.9  | 503.3  | 0.799982084 | 471.975  | 458.7    | 13.275  | 1.028940484 | 0.7352   | -1.04  |



|             |         |        |        |        |        |        |         |        |             |          |          |         |             |          |        |
|-------------|---------|--------|--------|--------|--------|--------|---------|--------|-------------|----------|----------|---------|-------------|----------|--------|
| 101457_at   | 264.3   | 243.8  | 249    | 265.6  | 208    | 288.3  | 279.9   | 222.6  | 0.791188167 | 255.675  | 249.7    | 5.975   | 1.023928714 | 0.7096   | -1.034 |
| 101458_at   | 543.1   | 524.1  | 423.5  | 585.6  | 313.8  | 392.9  | 320.4   | 342.9  | 0.007756807 | 519.075  | 342.5    | 176.575 | 1.515547445 | 0.003006 | -1.511 |
| 101459_at   | 611.3   | 585.1  | 617.4  | 706.4  | 507.1  | 590.7  | 527.1   | 776    | 0.677442068 | 630.05   | 600.225  | 29.825  | 1.0496897   | 0.5837   | -1.062 |
| 101461_f_at | 8221.8  | 7374.3 | 7424.5 | 7895.9 | 8249.6 | 7179.6 | 7842.9  | 8057.1 | 0.749436854 | 7729.125 | 7832.3   | 103.175 | 0.986826986 | 0.7579   | -1.013 |
| 101462_r_at | 257     | 159.4  | 183    | 214.5  | 204.6  | 247.9  | 199.8   | 202.4  | 0.690080928 | 203.475  | 213.675  | 10.2    | 0.952263952 | 0.6154   | -1.063 |
| 101463_at   | 69.2    | 13.1   | 43.8   | 19.7   | 67.6   | 44.7   | 47      | 36     | 0.433317508 | 36.45    | 48.825   | 12.375  | 0.746543779 | 0.2839   | 1.599  |
| 101464_at   | 1229.2  | 1238.7 | 1290.9 | 1586.4 | 1858.3 | 1161.9 | 1743.4  | 1684.9 | 0.182078075 | 1336.3   | 1612.125 | 275.825 | 0.828905947 | 0.1951   | 1.194  |
| 101465_at   | 149.7   | 162.1  | 174.9  | 152.1  | 145.1  | 155.6  | 132.5   | 154.6  | 0.155829513 | 159.7    | 146.95   | 12.75   | 1.086764206 | 0.1565   | -1.087 |
| 101466_at   | 175.1   | 139.3  | 159.6  | 135.5  | 206.1  | 176.6  | 194.3   | 187.2  | 0.016404009 | 152.375  | 191.05   | 38.675  | 0.797566082 | 0.01497  | 1.259  |
| 101467_at   | 143.3   | 161.3  | 161.7  | 209    | 187.8  | 249.5  | 260.2   | 137.7  | 0.272238465 | 168.825  | 208.8    | 39.975  | 0.808548851 | 0.2972   | 1.211  |
| 101468_at   | 19.2    | 53.9   | 61.6   | 62.5   | 76.7   | 52.7   | 69.3    | 61.6   | 0.23348738  | 49.3     | 65.075   | 15.775  | 0.757587399 | 0.2606   | 1.443  |
| 101469_at   | 1457.8  | 1048.9 | 1201.4 | 1403.2 | 897.1  | 1279.7 | 915.6   | 1392.9 | 0.361825903 | 1277.825 | 1121.325 | 156.5   | 1.13956703  | 0.339    | -1.152 |
| 101470_at   | 74      | 86.4   | 75     | 75.5   | 69.7   | 69.6   | 76.6    | 95.1   | 0.997178977 | 77.725   | 77.75    | 0.025   | 0.999678457 | 0.9421   | -1.006 |
| 101471_at   | 23.8    | 15.4   | 20.1   | 13.7   | 48.5   | 9.1    | 19.1    | 13.6   | 0.66588028  | 18.25    | 22.575   | 4.325   | 0.80841639  | 0.9327   | -1.034 |
| 101472_s_at | 146.7   | 22.8   | 45.2   | 104.3  | 275.1  | 34.7   | 124.7   | 164.2  | 0.279053341 | 79.75    | 149.675  | 69.925  | 0.532821112 | 0.3406   | 1.877  |
| 101473_at   | 102.8   | 64.6   | 48.5   | 132.1  | 145.2  | 84.3   | 48.6    | 28.4   | 0.756303899 | 87       | 76.625   | 10.375  | 1.135399674 | 0.6003   | -1.26  |
| 101474_at   | 9.6     | 28.9   | 57     | 43     | 38     | 14.2   | 31.8    | 23.9   | 0.533873787 | 34.625   | 26.975   | 7.65    | 1.283595922 | 0.789    | -1.133 |
| 101475_at   | 1362.8  | 1662.2 | 1359   | 1417.6 | 2093.5 | 1553   | 1520.6  | 1592   | 0.184526094 | 1450.4   | 1689.775 | 239.375 | 0.858339128 | 0.1478   | 1.159  |
| 101476_at   | 1091.1  | 1769   | 1545.8 | 1746.8 | 1466.6 | 1911.6 | 1746.5  | 1716.7 | 0.389270604 | 1538.175 | 1710.35  | 172.175 | 0.89933347  | 0.3777   | 1.127  |
| 101480_at   | 202.5   | 165.3  | 231.3  | 311.6  | 298.7  | 262.2  | 279     | 321.2  | 0.136032559 | 227.675  | 290.275  | 62.6    | 0.784342434 | 0.105    | 1.306  |
| 101481_at   | 926.5   | 680.2  | 769.6  | 799.2  | 467.7  | 662.9  | 654.9   | 672.4  | 0.04431602  | 793.875  | 614.475  | 179.4   | 1.291956548 | 0.05254  | -1.298 |
| 101482_at   | 1963.2  | 2615.8 | 2172.5 | 2736.1 | 2267.9 | 2371.9 | 2625.6  | 2609.3 | 0.656098268 | 2371.9   | 2468.675 | 96.775  | 0.960798809 | 0.6041   | -1.048 |
| 101483_at   | 1215.6  | 1169.4 | 1473.5 | 1243.5 | 1542   | 1536.7 | 1555.9  | 1424.9 | 0.030423915 | 1275.5   | 1514.875 | 239.375 | 0.841983662 | 0.01879  | 1.192  |
| 101484_at   | 1368.7  | 1866.9 | 1240.7 | 1434.3 | 1371.5 | 1245.6 | 1594.2  | 1967.4 | 0.759079004 | 1477.65  | 1544.675 | 67.025  | 0.956608995 | 0.7674   | -1.042 |
| 101485_at   | 3186.1  | 3433.4 | 2887   | 2615.3 | 4211.1 | 2999.9 | 3916.3  | 2982.3 | 0.231433861 | 3030.45  | 3527.4   | 496.95  | 0.859117197 | 0.2252   | 1.156  |
| 101486_at   | 685.6   | 464.6  | 617.4  | 513    | 726.7  | 654.2  | 720.9   | 571.5  | 0.167548749 | 570.15   | 668.325  | 98.175  | 0.853102907 | 0.1628   | 1.18   |
| 101487_f_at | 10452.9 | 9160.9 | 9690.6 | 8875.2 | 9603.3 | 9509.9 | 10414.8 | 8956.3 | 0.873698594 | 9544.9   | 9621.075 | 76.175  | 0.992082486 | 0.8648   | -1.008 |
| 101488_r_at | 81.7    | 26.2   | 45.5   | 33     | 70.8   | 62.1   | 64.1    | 97.3   | 0.125783309 | 46.6     | 73.575   | 26.975  | 0.633367312 | 0.09176  | 1.709  |
| 101489_at   | 2363.6  | 1659.4 | 1914.6 | 2315.2 | 1731.3 | 1810.3 | 1914.3  | 2218.2 | 0.499437151 | 2063.2   | 1918.525 | 144.675 | 1.075409494 | 0.5276   | -1.069 |
| 101490_at   | 1552.7  | 1200   | 1224.5 | 1549.5 | 929.9  | 1356.2 | 1194.2  | 1611.8 | 0.556877519 | 1381.675 | 1273.025 | 108.65  | 1.085347892 | 0.5152   | -1.099 |
| 101492_at   | 334.9   | 359.4  | 371.4  | 318.1  | 423    | 331.3  | 332.8   | 297.6  | 0.994252004 | 345.95   | 346.175  | 0.225   | 0.99935004  | 0.9437   | -1.006 |
| 101493_at   | 12.4    | 13.8   | 26.3   | 17.4   | 41.4   | 31.6   | 26.1    | 80.9   | 0.109830826 | 17.475   | 45       | 27.525  | 0.388333333 | 0.02448  | 2.434  |
| 101494_at   | 170.3   | 177.4  | 154.4  | 163.2  | 150.9  | 150.9  | 162.8   | 151.6  | 0.086070582 | 166.325  | 154.05   | 12.275  | 1.079681921 | 0.07408  | -1.079 |
| 101495_at   | 5659.7  | 4615.6 | 5332.4 | 4334   | 4588.6 | 5173.7 | 4910.9  | 4438.2 | 0.580115102 | 4985.425 | 4777.85  | 207.575 | 1.043445274 | 0.6055   | -1.039 |
| 101498_at   | 700.5   | 808.7  | 762    | 763    | 953.7  | 651.8  | 670.1   | 647.2  | 0.740532055 | 758.55   | 730.7    | 27.85   | 1.038114137 | 0.6285   | -1.051 |
| 101499_at   | 1409.7  | 1624.1 | 1236.6 | 1650   | 1347.9 | 1421.6 | 1400.4  | 1729.1 | 0.9685423   | 1480.1   | 1474.75  | 5.35    | 1.003627734 | 0.9851   | -1.002 |
| 101500_at   | 405.1   | 431.4  | 438.9  | 436.3  | 473.5  | 389.2  | 416.1   | 411.2  | 0.795230641 | 427.925  | 422.5    | 5.425   | 1.012840237 | 0.7534   | -1.015 |
| 101501_r_at | 153.2   | 97.7   | 117.1  | 77.6   | 93.9   | 114.1  | 81.4    | 81.8   | 0.352026236 | 111.4    | 92.8     | 18.6    | 1.200431034 | 0.3634   | -1.175 |
| 101502_at   | 1930.2  | 2703.5 | 1928.3 | 2237.8 | 1723.3 | 2134.7 | 1688.9  | 1995.3 | 0.200333509 | 2199.95  | 1885.55  | 314.4   | 1.166741799 | 0.1793   | -1.161 |
| 101503_at   | 343.5   | 273.5  | 384.4  | 372.8  | 297    | 315.6  | 284.6   | 375.4  | 0.458850817 | 343.55   | 318.15   | 25.4    | 1.079836555 | 0.4794   | -1.077 |
| 101505_at   | 750     | 877    | 673.6  | 636.6  | 760.4  | 834.9  | 926.8   | 848.8  | 0.145094105 | 734.3    | 842.725  | 108.425 | 0.871339998 | 0.1296   | 1.154  |
| 101506_at   | 864     | 667.4  | 694.5  | 756.3  | 604.5  | 725.3  | 700.5   | 618.9  | 0.172734409 | 745.55   | 662.3    | 83.25   | 1.125698324 | 0.1603   | -1.124 |
| 101507_at   | 333.8   | 314.6  | 252.2  | 247.4  | 437.2  | 239.1  | 327.1   | 258.2  | 0.596864865 | 287      | 315.4    | 28.4    | 0.909955612 | 0.6497   | -1.077 |
| 101508_at   | 260.6   | 294.4  | 149.6  | 201    | 290.2  | 161.5  | 229.3   | 589    | 0.415979321 | 226.4    | 317.5    | 91.1    | 0.713070866 | 0.4491   | 1.287  |
| 101509_at   | 3906    | 3099   | 3114   | 2939.3 | 2960.2 | 3099.3 | 2810.6  | 3222.8 | 0.362601484 | 3264.575 | 3023.225 | 241.35  | 1.079831968 | 0.3424   | -1.075 |
| 101510_at   | 2577.8  | 2536.6 | 2318.8 | 1968.9 | 3535.4 | 2356   | 2327.6  | 2267.6 | 0.46225009  | 2350.525 | 2621.65  | 271.125 | 0.896582305 | 0.4602   | -1.102 |
| 101511_at   | 7.9     | 14     | 16.8   | 5.4    | 5.5    | 5.7    | 4.5     | 19.6   | 0.641249893 | 11.025   | 8.825    | 2.2     | 1.249291785 | 0.4838   | -1.374 |
| 101513_at   | 93.5    | 78     | 93.5   | 107.5  | 79.4   | 90.7   | 95      | 113    | 0.884420422 | 93.125   | 94.525   | 1.4     | 0.985189103 | 0.8962   | -1.013 |
| 101514_at   | 1156.8  | 1041.1 | 1252.4 | 1256   | 997.7  | 1180.9 | 1178.4  | 1101.8 | 0.389050889 | 1176.575 | 1114.7   | 61.875  | 1.055508208 | 0.402    | -1.055 |
| 101515_at   | 186.6   | 219    | 201.3  | 159.6  | 195.7  | 242.8  | 168.5   | 201.7  | 0.61460531  | 191.625  | 202.175  | 10.55   | 0.947817485 | 0.6269   | -1.053 |
| 101516_at   | 695.3   | 712.2  | 537.9  | 453.1  | 674.9  | 612.7  | 519.6   | 577.3  | 0.962576961 | 599.625  | 596.125  | 3.5     | 1.005871252 | 0.957    | -1.007 |
| 101517_at   | 682.1   | 742.4  | 838.4  | 717.6  | 760.6  | 782.3  | 773.7   | 539.6  | 0.664229631 | 745.125  | 714.05   | 31.075  | 1.043519361 | 0.6274   | -1.052 |
| 101518_at   | 465.5   | 372.4  | 322.9  | 478.5  | 488.5  | 424    | 476.9   | 542.8  | 0.159941441 | 409.825  | 483.05   | 73.225  | 0.848411138 | 0.1548   | 1.19   |
| 101519_at   | 3884.2  | 2994.6 | 3278.7 | 2849.8 | 3332.7 | 3010.1 | 3208.3  | 2519.1 | 0.452454774 | 3251.825 | 3017.55  | 234.275 | 1.077637487 | 0.4564   | -1.076 |
| 101520_at   | 498.5   | 525.6  | 476.3  | 489.6  | 544.1  | 517.3  | 570.2   | 388.1  | 0.868878449 | 497.5    | 504.925  | 7.425   | 0.985294846 | 0.9583   | -1.005 |
| 101521_at   | 986.9   | 808.5  | 871.3  | 801.7  | 906.1  | 722.9  | 812.6   | 533.8  | 0.234742445 | 867.1    | 743.85   | 123.25  | 1.165692008 | 0.2226   | -1.183 |



|             |         |         |         |         |         |         |         |         |             |           |          |          |             |            |        |
|-------------|---------|---------|---------|---------|---------|---------|---------|---------|-------------|-----------|----------|----------|-------------|------------|--------|
| 101522_at   | 23.8    | 43.4    | 52.4    | 29.1    | 44      | 32.9    | 50.8    | 62.9    | 0.292301638 | 37.175    | 47.65    | 10.475   | 0.780167891 | 0.2773     | 1.31   |
| 101523_at   | 6283.3  | 7090.2  | 5938.6  | 6915.8  | 8153.5  | 6779.9  | 6370.8  | 5548.2  | 0.808689198 | 6556.975  | 6713.1   | 156.125  | 0.976743233 | 0.8613     | -1.017 |
| 101524_at   | 236     | 177.6   | 249.6   | 219.4   | 111.3   | 330.3   | 143.1   | 156.8   | 0.536111801 | 220.65    | 185.375  | 35.275   | 1.190289953 | 0.3374     | -1.292 |
| 101525_at   | 2235.8  | 2200.4  | 2062.6  | 1663.6  | 2829.6  | 1800.3  | 1948.8  | 1880    | 0.798267593 | 2040.6    | 2114.675 | 74.075   | 0.964970977 | 0.8468     | -1.025 |
| 101526_at   | 84.9    | 56.4    | 197     | 96.2    | 52.2    | 193.9   | 36.9    | 121.1   | 0.877598033 | 108.625   | 101.025  | 7.6      | 1.075228904 | 0.718      | -1.191 |
| 101527_at   | 2134.3  | 1979.2  | 2145    | 1943.3  | 1997.4  | 2213.3  | 2185.7  | 1815    | 0.982908119 | 2050.45   | 2052.85  | 2.4      | 0.998830894 | 0.985      | -1.001 |
| 101528_at   | 1502.9  | 1261.1  | 1317.1  | 1237.3  | 950.3   | 1361.1  | 984     | 1178.6  | 0.119038177 | 1329.6    | 1118.5   | 211.1    | 1.188734913 | 0.1042     | -1.198 |
| 101529_g_at | 1101.5  | 825.2   | 978.1   | 876.4   | 637.9   | 824.7   | 674.2   | 906     | 0.080138366 | 945.3     | 760.7    | 184.6    | 1.242671224 | 0.07819    | -1.248 |
| 101530_at   | 1164    | 1174.9  | 996.9   | 1169.1  | 953.1   | 965.5   | 1024.7  | 1098.5  | 0.080757404 | 1126.225  | 1010.45  | 115.775  | 1.114577663 | 0.0812     | -1.114 |
| 101531_at   | 24.7    | 43.4    | 45.6    | 64.9    | 71.9    | 37.2    | 34.3    | 45.7    | 0.832251081 | 44.65     | 47.275   | 2.625    | 0.944473823 | 0.7964     | -1.073 |
| 101532_g_at | 19.6    | 22.4    | 32.4    | 22.1    | 32      | 24.2    | 23.5    | 19.4    | 0.871933857 | 24.125    | 24.775   | 0.65     | 0.973763875 | 0.8542     | -1.029 |
| 101534_at   | 45.1    | 40.9    | 55.7    | 37      | 33.1    | 28.4    | 29.5    | 48.2    | 0.157348442 | 44.675    | 34.8     | 9.875    | 1.283764368 | 0.1293     | -1.299 |
| 101536_at   | 732.2   | 761.9   | 700.4   | 731.4   | 677.2   | 758.8   | 616.8   | 526.7   | 0.174539245 | 731.475   | 644.875  | 86.6     | 1.134289591 | 0.14       | -1.144 |
| 101537_at   | 4.8     | 17.5    | 6.2     | 23.2    | 45.8    | 6.6     | 5.5     | 6       | 0.792903579 | 12.925    | 15.975   | 3.05     | 0.809076682 | 0.9402     | -1.051 |
| 101538_i_at | 6.8     | 6.5     | 7       | 10.1    | 34.7    | 35.6    | 9.3     | 18.5    | 0.076645285 | 7.6       | 24.525   | 16.925   | 0.30988787  | 0.01942    | 2.878  |
| 101539_f_at | 12.6    | 7.2     | 23.5    | 25.7    | 49.6    | 35.3    | 33.1    | 23.7    | 0.040881573 | 17.25     | 35.425   | 18.175   | 0.486944248 | 0.05146    | 2.241  |
| 101540_at   | 779.9   | 791.1   | 844.7   | 1039.4  | 617.6   | 764.4   | 746.7   | 916.8   | 0.278324214 | 863.775   | 761.375  | 102.4    | 1.134493515 | 0.2629     | -1.138 |
| 101541_at   | 41.4    | 21.5    | 41.9    | 69.5    | 67.3    | 51.1    | 64      | 39.4    | 0.357390103 | 43.575    | 55.45    | 11.875   | 0.785843102 | 0.306      | 1.353  |
| 101542_f_at | 2987.9  | 2434.5  | 2298.2  | 2964.5  | 1752.8  | 2931.3  | 2180.3  | 2444.9  | 0.305643529 | 2671.275  | 2327.325 | 343.95   | 1.147787696 | 0.2874     | -1.16  |
| 101543_f_at | 17763   | 18982.8 | 19318.7 | 14549.6 | 24748.2 | 15756.9 | 19115.1 | 16457.6 | 0.582843775 | 17653.525 | 19019.45 | 1365.925 | 0.928182729 | 0.6128     | -1.067 |
| 101546_at   | 72.9    | 83.6    | 89.6    | 105.3   | 102.3   | 81.8    | 102.9   | 97.5    | 0.364321054 | 87.85     | 96.125   | 8.275    | 0.913914174 | 0.3515     | -1.099 |
| 101548_at   | 142.1   | 89.9    | 75.3    | 96.8    | 107.8   | 101     | 69.9    | 88.4    | 0.603166222 | 101.025   | 91.775   | 9.25     | 1.100789975 | 0.6406     | -1.084 |
| 101550_at   | 1.7     | 14.8    | 2.6     | 1       | 1.9     | 2.2     | 15.1    | 12.8    | 0.555823695 | 5.025     | 8        | 2.975    | 0.628125    | 0.4753     | 1.852  |
| 101551_s_at | 158.1   | 177.9   | 133.6   | 85.4    | 180.6   | 194.9   | 215.3   | 163     | 0.085009864 | 138.75    | 188.45   | 49.7     | 0.736269568 | 0.09676    | 1.401  |
| 101552_at   | 52.1    | 38.5    | 55.8    | 49.3    | 46.3    | 56.9    | 86.8    | 46.6    | 0.375997609 | 48.925    | 59.15    | 10.225   | 0.827134404 | 0.365      | 1.179  |
| 101553_at   | 15.1    | 8.9     | 13.8    | 15.6    | 11.2    | 14.7    | 15.3    | 14.6    | 0.751379994 | 13.35     | 13.95    | 0.6      | 0.956989247 | 0.6986     | -1.062 |
| 101554_at   | 1363.3  | 1471.3  | 1495    | 1255.8  | 1626.8  | 947.9   | 1099.9  | 1136.1  | 0.287954655 | 1396.35   | 1202.675 | 193.675  | 1.161036855 | 0.2165     | -1.182 |
| 101555_at   | 5223.3  | 7236.7  | 6919.5  | 5507.3  | 5435.4  | 6786.8  | 5757.7  | 3995.5  | 0.378511644 | 6221.7    | 5493.85  | 727.85   | 1.132484505 | 0.3726     | -1.141 |
| 101557_at   | 1335.5  | 1399.1  | 1362.2  | 1440.7  | 1282.1  | 1214.6  | 1501.4  | 1484.9  | 0.866690698 | 1384.375  | 1370.75  | 13.625   | 1.009939814 | 0.8134     | -1.014 |
| 101558_s_at | 3706.8  | 2911.4  | 3172    | 3076.4  | 2527.5  | 3049.3  | 2556.5  | 2509.8  | 0.044669461 | 3216.65   | 2660.775 | 555.875  | 1.208914696 | 0.03508    | -1.208 |
| 101560_at   | 344.7   | 239.2   | 296.3   | 334.9   | 87.4    | 71.8    | 70.7    | 72      | 0.002031517 | 303.775   | 75.475   | 228.3    | 4.024842663 | 0.00000741 | -4.002 |
| 101561_at   | 2132.3  | 1717.8  | 1781.7  | 2872.9  | 2247.2  | 3463.4  | 2819.7  | 3710.6  | 0.071397555 | 2126.175  | 3060.225 | 934.05   | 0.694777345 | 0.0652     | 1.444  |
| 101562_at   | 685.2   | 538.3   | 522.7   | 583.4   | 390.6   | 507.4   | 432.4   | 488.6   | 0.033536431 | 582.4     | 454.75   | 127.65   | 1.280703683 | 0.02723    | -1.28  |
| 101564_at   | 262.4   | 286.5   | 264.8   | 315.8   | 215     | 324     | 260.6   | 303.8   | 0.821010828 | 282.375   | 275.85   | 6.525    | 1.02365416  | 0.7562     | -1.033 |
| 101565_f_at | 145.5   | 143.6   | 214.9   | 113.5   | 144.1   | 140     | 169.2   | 209.2   | 0.689481741 | 154.375   | 165.625  | 11.25    | 0.932075472 | 0.6186     | -1.088 |
| 101566_f_at | 2.4     | 9.8     | 5.1     | 3.6     | 2.2     | 2.6     | 17.3    | 4.4     | 0.739551126 | 5.225     | 6.625    | 1.4      | 0.788679245 | 0.9948     | -1.004 |
| 101567_at   | 148.5   | 116.9   | 95.6    | 148.9   | 216.4   | 134     | 130.9   | 111.4   | 0.474838765 | 127.475   | 148.175  | 20.7     | 0.860300321 | 0.4803     | 1.144  |
| 101568_at   | 520.5   | 452.3   | 454.2   | 362.8   | 454.4   | 442.7   | 418.1   | 341.9   | 0.451792247 | 447.45    | 414.275  | 33.175   | 1.080079657 | 0.4761     | -1.078 |
| 101569_at   | 102.3   | 62.3    | 102.4   | 124.6   | 115.2   | 134.9   | 131     | 194.3   | 0.081833277 | 97.9      | 143.85   | 45.95    | 0.680570038 | 0.0773     | 1.485  |
| 101570_at   | 22.7    | 19.7    | 29.2    | 51.6    | 16.1    | 19.7    | 44.8    | 35      | 0.853330856 | 30.8      | 28.9     | 1.9      | 1.065743945 | 0.8193     | -1.079 |
| 101571_g_at | 742.2   | 1031.9  | 961.5   | 1040.8  | 789.7   | 1010.4  | 1026    | 1319.1  | 0.506101387 | 944.1     | 1036.3   | 92.2     | 0.911029625 | 0.5385     | -1.089 |
| 101572_f_at | 8.9     | 11      | 19.6    | 19.6    | 5.7     | 36      | 17.3    | 12.7    | 0.678305347 | 14.775    | 17.925   | 3.15     | 0.824267782 | 0.9232     | -1.044 |
| 101573_f_at | 13687.4 | 14816.8 | 16835.9 | 14040.3 | 27910   | 13108.6 | 18302.3 | 15957.1 | 0.306339712 | 14845.1   | 18819.5  | 3974.4   | 0.788814793 | 0.2744     | 1.222  |
| 101574_f_at | 69.3    | 47.1    | 41.5    | 64.5    | 69      | 15      | 35.5    | 20.2    | 0.20071099  | 55.6      | 34.925   | 20.675   | 1.59198282  | 0.1357     | -1.853 |
| 101575_i_at | 73.3    | 71      | 94.5    | 112.2   | 103.9   | 77.5    | 111.6   | 118.2   | 0.297742692 | 87.75     | 102.8    | 15.05    | 0.853599222 | 0.2972     | 1.178  |
| 101576_f_at | 15.9    | 31.8    | 24.9    | 20.2    | 36.3    | 17.2    | 47.4    | 27      | 0.287922228 | 23.2      | 31.975   | 8.775    | 0.725566849 | 0.3182     | 1.331  |
| 101577_at   | 19675.6 | 20568   | 18034.3 | 18021.5 | 29897.7 | 16154.2 | 18316   | 19373.3 | 0.590609488 | 19074.85  | 20935.3  | 1860.45  | 0.911133349 | 0.6481     | -1.068 |
| 101578_f_at | 838.9   | 1089.5  | 717     | 724.7   | 1826.5  | 640.3   | 1100.2  | 1817.5  | 0.181261728 | 842.525   | 1346.125 | 503.6    | 0.625889126 | 0.1875     | 1.49   |
| 101579_at   | 2095.4  | 1514.7  | 1701.3  | 1730.8  | 1513.8  | 1692.1  | 1592    | 1670.7  | 0.330774412 | 1760.55   | 1617.15  | 143.4    | 1.08867452  | 0.3133     | -1.082 |
| 101580_at   | 2210.6  | 1908.5  | 2002.8  | 2121.6  | 3618.5  | 2020.3  | 2457.7  | 2085.5  | 0.283213405 | 2060.875  | 2545.5   | 484.625  | 0.809615007 | 0.229      | 1.202  |
| 101581_at   | 378.6   | 352.7   | 318.6   | 422.6   | 210.7   | 350.1   | 292.1   | 307.9   | 0.080290252 | 368.125   | 290.2    | 77.925   | 1.268521709 | 0.08986    | -1.283 |
| 101582_at   | 717.1   | 569.9   | 590.1   | 492.7   | 521.3   | 573.4   | 498.6   | 487.2   | 0.224291574 | 592.45    | 520.125  | 72.325   | 1.139053112 | 0.1985     | -1.131 |
| 101583_at   | 1225    | 1087.1  | 1433.5  | 1214.9  | 1162.4  | 1268    | 1213.4  | 1115.9  | 0.557274184 | 1240.125  | 1189.925 | 50.2     | 1.042187533 | 0.5736     | -1.038 |
| 101584_at   | 2112.7  | 1524.7  | 1898.1  | 1719.1  | 1202.1  | 1751.1  | 1444.2  | 1434.5  | 0.079964463 | 1813.65   | 1457.975 | 355.675  | 1.243951371 | 0.07814    | -1.246 |
| 101585_at   | 4603.1  | 4487.8  | 4146.2  | 4315.3  | 4818.7  | 4900.3  | 4841.1  | 4420    | 0.05331227  | 4388.1    | 4745.025 | 356.925  | 0.924779111 | 0.05513    | -1.081 |
| 101587_at   | 394     | 265.6   | 293.6   | 256.8   | 556.3   | 347.3   | 367.9   | 453     | 0.071800316 | 302.5     | 431.125  | 128.625  | 0.701652653 | 0.05131    | 1.421  |



|             |         |        |        |        |         |       |        |        |             |          |         |         |             |         |        |
|-------------|---------|--------|--------|--------|---------|-------|--------|--------|-------------|----------|---------|---------|-------------|---------|--------|
| 101588_at   | 73.5    | 52.1   | 67     | 76.7   | 60.8    | 87.2  | 71.4   | 61.8   | 0.729401645 | 67.325   | 70.3    | 2.975   | 0.957681366 | 0.7295  | -1.045 |
| 101589_at   | 2612.4  | 2824.4 | 2317   | 3228.3 | 3408.2  | 3392  | 3115.9 | 2327.5 | 0.362016924 | 2745.525 | 3060.9  | 315.375 | 0.896966578 | 0.3933  | -1.11  |
| 101590_at   | 3475    | 2551.5 | 2506.6 | 3262.7 | 1824.6  | 2991  | 2195.8 | 2528.6 | 0.157829204 | 2948.95  | 2385    | 563.95  | 1.236457023 | 0.1553  | -1.244 |
| 101591_at   | 908.2   | 699.5  | 1147.3 | 755.2  | 1056.2  | 908.1 | 655    | 1038.7 | 0.795605342 | 877.55   | 914.5   | 36.95   | 0.959595407 | 0.7946  | -1.043 |
| 101593_at   | 107.5   | 114    | 102.7  | 87.7   | 117.4   | 121.2 | 136    | 100.5  | 0.139753511 | 102.975  | 118.775 | 15.8    | 0.866975374 | 0.1429  | 1.152  |
| 101595_at   | 78.4    | 48.7   | 84.6   | 102.5  | 83.1    | 64.7  | 70.8   | 100.2  | 0.935929132 | 78.55    | 79.7    | 1.15    | 0.985570891 | 0.8541  | -1.036 |
| 101596_at   | 17.1    | 6.2    | 2.2    | 17     | 20.1    | 15.9  | 22     | 5.6    | 0.356073619 | 10.625   | 15.9    | 5.275   | 0.668238994 | 0.361   | 1.775  |
| 101597_at   | 37.2    | 39.5   | 20     | 35.3   | 8.3     | 28.3  | 35.6   | 18.2   | 0.214191831 | 33       | 22.6    | 10.4    | 1.460176991 | 0.2285  | -1.613 |
| 101598_at   | 12.7    | 27.8   | 51.9   | 25.6   | 63.8    | 22.4  | 33.3   | 15.1   | 0.76936985  | 29.5     | 33.65   | 4.15    | 0.87667162  | 0.8086  | -1.113 |
| 101599_at   | 22.4    | 23.7   | 38.2   | 35.6   | 19.3    | 27.3  | 31.5   | 21.8   | 0.350608937 | 29.975   | 24.975  | 5       | 1.2002002   | 0.3641  | -1.188 |
| 101600_at   | 140.9   | 164.7  | 146.8  | 182.5  | 107.9   | 167.5 | 144.9  | 148.1  | 0.330398347 | 158.725  | 142.1   | 16.625  | 1.116995074 | 0.3259  | -1.125 |
| 101601_at   | 13.7    | 21.8   | 27.1   | 36.1   | 31.4    | 7.1   | 15.3   | 8.2    | 0.257639204 | 24.675   | 15.5    | 9.175   | 1.591935484 | 0.1881  | -1.797 |
| 101602_at   | 234.1   | 301.6  | 294.8  | 258.1  | 307.5   | 300.6 | 261.3  | 277.3  | 0.480099595 | 272.15   | 286.675 | 14.525  | 0.949332868 | 0.4621  | -1.057 |
| 101603_g_at | 65.2    | 65.1   | 66.2   | 106.8  | 79.9    | 54.4  | 94.1   | 138.3  | 0.473093839 | 75.825   | 91.675  | 15.85   | 0.827106627 | 0.5138  | 1.172  |
| 101604_at   | 8.8     | 10.1   | 4.4    | 1      | 2.4     | 9.9   | 18.4   | 18.2   | 0.221663167 | 6.075    | 12.225  | 6.15    | 0.496932515 | 0.3299  | 2.119  |
| 101605_at   | 6.7     | 6.9    | 36.9   | 31.4   | 26.3    | 8.7   | 56.6   | 42.9   | 0.355841492 | 20.475   | 33.625  | 13.15   | 0.608921933 | 0.3827  | 1.797  |
| 101606_at   | 79.4    | 44.3   | 146.7  | 100.6  | 82.8    | 53.6  | 124.4  | 46.4   | 0.587457072 | 92.75    | 76.8    | 15.95   | 1.207682292 | 0.6177  | -1.193 |
| 101607_at   | 99.3    | 123.6  | 122    | 145.8  | 169.5   | 125.2 | 142    | 205.1  | 0.120379625 | 122.675  | 160.45  | 37.775  | 0.764568401 | 0.09862 | 1.297  |
| 101608_at   | 10.4    | 8      | 10.9   | 8.2    | 9.3     | 6.9   | 7.1    | 6.6    | 0.098621696 | 9.375    | 7.475   | 1.9     | 1.254180602 | 0.09109 | -1.255 |
| 101609_at   | 31.5    | 28.2   | 34.8   | 21.3   | 38.8    | 29.5  | 38.8   | 32.7   | 0.158238831 | 28.95    | 34.95   | 6       | 0.82832618  | 0.1666  | 1.218  |
| 101610_at   | 6.4     | 5.9    | 5.9    | 9.2    | 12.4    | 6     | 7.9    | 17.6   | 0.210236471 | 6.85     | 10.975  | 4.125   | 0.624145786 | 0.1662  | 1.505  |
| 101611_at   | 37.1    | 31.4   | 72.1   | 70.5   | 80.1    | 43.8  | 98.7   | 63     | 0.286871362 | 52.775   | 71.4    | 18.625  | 0.739145658 | 0.2829  | 1.386  |
| 101612_at   | 11.2    | 12     | 16.4   | 39.4   | 15.6    | 25.8  | 14     | 32.8   | 0.784580225 | 19.75    | 22.05   | 2.3     | 0.89569161  | 0.6107  | 1.208  |
| 101613_at   | 56      | 25.4   | 14.4   | 70.2   | 15.6    | 19.3  | 55.4   | 79     | 0.968425765 | 41.5     | 42.325  | 0.825   | 0.980507974 | 0.9686  | -1.022 |
| 101614_at   | 34.5    | 31.8   | 40.9   | 29.2   | 7       | 43.6  | 19.8   | 40.3   | 0.521224373 | 34.1     | 27.675  | 6.425   | 1.232158988 | 0.3651  | -1.523 |
| 101615_at   | 17      | 15.6   | 21.7   | 19.2   | 18.1    | 15.2  | 13.8   | 17.8   | 0.252960315 | 18.375   | 16.225  | 2.15    | 1.132511556 | 0.2566  | -1.129 |
| 101616_at   | 73.4    | 20.7   | 25.1   | 21.5   | 27.4    | 21.9  | 20.9   | 32.5   | 0.515569529 | 35.175   | 25.675  | 9.5     | 1.370009737 | 0.5999  | -1.192 |
| 101617_s_at | 208     | 171.7  | 183.4  | 164.5  | 170.7   | 212.1 | 204.3  | 212.5  | 0.238573654 | 181.9    | 199.9   | 18      | 0.909954977 | 0.2432  | -1.099 |
| 101618_r_at | 217.9   | 250.8  | 261.9  | 285.2  | 419.4   | 253.6 | 352.2  | 216.6  | 0.314740727 | 253.95   | 310.45  | 56.5    | 0.81800612  | 0.3261  | 1.188  |
| 101619_at   | 1       | 1      | 1.1    | 2.1    | 1.9     | 1.4   | 2.4    | 1.3    | 0.268024411 | 1.3      | 1.75    | 0.45    | 0.742857143 | 0.2223  | 1.36   |
| 101620_at   | 6       | 2.3    | 4.3    | 3.1    | 8.4     | 2.8   | 2.8    | 3.4    | 0.798689073 | 3.925    | 4.35    | 0.425   | 0.902298851 | 0.8865  | -1.051 |
| 101621_at   | 382.7   | 300    | 355.7  | 295.5  | 271.2   | 329   | 318.1  | 290.3  | 0.267243466 | 333.475  | 302.15  | 31.325  | 1.103673672 | 0.2637  | -1.1   |
| 101622_at   | 103.8   | 79.2   | 82.8   | 98.9   | 60.5    | 41.4  | 90.2   | 107.6  | 0.367337742 | 91.175   | 74.925  | 16.25   | 1.21688355  | 0.2988  | -1.289 |
| 101623_at   | 98.5    | 117.5  | 76.9   | 82.7   | 134     | 92.7  | 130.8  | 54     | 0.687891845 | 93.9     | 102.875 | 8.975   | 0.912758202 | 0.8556  | -1.045 |
| 101624_at   | 35.4    | 22.4   | 75.2   | 38.8   | 16.6    | 73    | 49.4   | 54     | 0.756006276 | 42.95    | 48.25   | 5.3     | 0.89015544  | 0.8448  | -1.087 |
| 101625_at   | 76.8    | 121.5  | 94.3   | 134.6  | 119.7   | 128.9 | 89.3   | 110.6  | 0.745794073 | 106.8    | 112.125 | 5.325   | 0.952508361 | 0.6881  | -1.065 |
| 101626_at   | 15.7    | 28.9   | 23.8   | 34.9   | 55.6    | 36.4  | 54.6   | 51.2   | 0.00793895  | 25.825   | 49.45   | 23.625  | 0.522244692 | 0.01405 | 1.966  |
| 101627_at   | 87.7    | 83.1   | 90.6   | 95.9   | 62      | 93.8  | 63.8   | 85.5   | 0.19946549  | 89.325   | 76.275  | 13.05   | 1.171091445 | 0.1618  | -1.189 |
| 101628_g_at | 111.9   | 107.8  | 90.6   | 110.7  | 16.3    | 69.2  | 76.2   | 47.4   | 0.022991475 | 105.25   | 52.275  | 52.975  | 2.013390722 | 0.05484 | -2.333 |
| 101629_s_at | 2       | 3.8    | 4.2    | 9.2    | 16.4    | 1.8   | 1.6    | 1.7    | 0.892230443 | 4.8      | 5.375   | 0.575   | 0.893023256 | 0.6152  | -1.412 |
| 101630_f_at | 43.5    | 47.5   | 61.6   | 70.8   | 30.6    | 31.2  | 39.8   | 51.5   | 0.07283002  | 55.85    | 38.275  | 17.575  | 1.459177008 | 0.06155 | -1.465 |
| 101631_at   | 366.2   | 417.2  | 295.6  | 487.7  | 483.5   | 363.8 | 366.2  | 657.9  | 0.387415133 | 391.675  | 467.85  | 76.175  | 0.83718072  | 0.3885  | 1.178  |
| 101632_at   | 71.3    | 46.9   | 85.4   | 92.9   | 117.6   | 82.1  | 80     | 66.2   | 0.43955276  | 74.125   | 86.475  | 12.35   | 0.857184157 | 0.4299  | 1.178  |
| 101633_at   | 12.5    | 10.6   | 44.2   | 15.6   | 38.4    | 54.8  | 14.7   | 18.4   | 0.409663922 | 20.725   | 31.575  | 10.85   | 0.656373713 | 0.3446  | 1.579  |
| 101634_at   | 10760.8 | 9055.2 | 9242.2 | 9153.8 | 10531.5 | 9109  | 9507   | 8518.3 | 0.823392495 | 9553     | 9416.45 | 136.55  | 1.014501219 | 0.8136  | -1.015 |
| 101635_f_at | 16.1    | 58.8   | 53.9   | 54.4   | 26.2    | 35.6  | 33.5   | 18.8   | 0.183187555 | 45.8     | 28.525  | 17.275  | 1.605609115 | 0.3011  | -1.475 |
| 101636_at   | 18.4    | 37.5   | 33.5   | 38.2   | 24.5    | 31.5  | 29.8   | 26.7   | 0.485478719 | 31.9     | 28.125  | 3.775   | 1.134222222 | 0.6342  | -1.095 |
| 101637_at   | 27.1    | 30.1   | 56.6   | 27     | 32.6    | 36.1  | 40.4   | 22.6   | 0.791390682 | 35.2     | 32.925  | 2.275   | 1.069096431 | 0.8731  | -1.037 |
| 101638_s_at | 3       | 3.2    | 3.2    | 6.2    | 5.8     | 5     | 5.2    | 7.1    | 0.092369821 | 3.9      | 5.775   | 1.875   | 0.675324675 | 0.06535 | 1.528  |
| 101639_r_at | 1.7     | 1.5    | 2.3    | 2.9    | 8.4     | 1.7   | 0.9    | 16.7   | 0.27995175  | 2.1      | 6.925   | 4.825   | 0.303249097 | 0.3967  | 1.881  |
| 101640_f_at | 24.4    | 25.1   | 36     | 24.9   | 87.8    | 22.4  | 24.9   | 30.9   | 0.439810513 | 27.6     | 41.5    | 13.9    | 0.665060241 | 0.4674  | 1.289  |
| 101641_at   | 25      | 34.2   | 12.6   | 35.5   | 33      | 25.6  | 17     | 26.8   | 0.851782699 | 26.825   | 25.6    | 1.225   | 1.047851563 | 0.9944  | -1.002 |
| 101642_at   | 33.2    | 34     | 31.2   | 33     | 62.8    | 29.5  | 29.6   | 38.7   | 0.421572413 | 32.85    | 40.15   | 7.3     | 0.818181818 | 0.4306  | 1.163  |
| 101643_at   | 19.7    | 16.2   | 24.3   | 23.3   | 16.7    | 24.3  | 26.1   | 34.2   | 0.326088262 | 20.875   | 25.325  | 4.45    | 0.824284304 | 0.3574  | 1.191  |
| 101644_f_at | 8.1     | 25.3   | 8.4    | 9.2    | 5.2     | 6.4   | 10.8   | 9.2    | 0.337480772 | 12.75    | 7.9     | 4.85    | 1.613924051 | 0.2702  | -1.474 |
| 101645_f_at | 17.2    | 16.2   | 15.1   | 12.4   | 13.7    | 11.1  | 15.4   | 13.7   | 0.247578594 | 15.225   | 13.475  | 1.75    | 1.12987013  | 0.2672  | -1.128 |



|             |         |         |         |         |         |         |         |         |             |          |           |          |             |         |        |
|-------------|---------|---------|---------|---------|---------|---------|---------|---------|-------------|----------|-----------|----------|-------------|---------|--------|
| 101646_at   | 25      | 37.9    | 24.9    | 21.8    | 8.3     | 19.6    | 42.1    | 17.7    | 0.52842654  | 27.4     | 21.925    | 5.475    | 1.249714937 | 0.3476  | -1.433 |
| 101647_at   | 36.5    | 58      | 29.3    | 28.5    | 55.6    | 43      | 25.7    | 12      | 0.747141571 | 38.075   | 34.075    | 4        | 1.117388114 | 0.5812  | -1.244 |
| 101648_at   | 15.5    | 8.9     | 17.6    | 12      | 19.9    | 38.5    | 7.7     | 41.3    | 0.191844134 | 13.5     | 26.85     | 13.35    | 0.502793296 | 0.2496  | 1.701  |
| 101649_at   | 28.3    | 63.3    | 53.6    | 30.2    | 30.9    | 44.9    | 14.1    | 13.7    | 0.169290754 | 43.85    | 25.9      | 17.95    | 1.693050193 | 0.1465  | -1.815 |
| 101650_at   | 96.7    | 120.8   | 98.2    | 85.9    | 77.6    | 102.3   | 74.2    | 133.7   | 0.834379284 | 100.4    | 96.95     | 3.45     | 1.035585353 | 0.7285  | -1.058 |
| 101651_at   | 87.2    | 52.6    | 92      | 25.9    | 72.7    | 99.3    | 90.9    | 80.7    | 0.268541305 | 64.425   | 85.9      | 21.475   | 0.75        | 0.239   | 1.483  |
| 101652_i_at | 7.5     | 6.8     | 7.5     | 5.9     | 6.8     | 8.1     | 6.9     | 5.5     | 0.883798788 | 6.925    | 6.825     | 0.1      | 1.014652015 | 0.8279  | -1.022 |
| 101653_f_at | 15.7    | 19.5    | 12.1    | 11.5    | 25.7    | 13.2    | 13.2    | 14.9    | 0.586983724 | 14.7     | 16.75     | 2.05     | 0.87761194  | 0.5977  | -1.118 |
| 101654_at   | 2.5     | 7.4     | 6.1     | 6.5     | 8.9     | 5.3     | 4       | 3.2     | 0.873784662 | 5.625    | 5.35      | 0.275    | 1.051401869 | 0.8835  | -1.052 |
| 101655_at   | 33.4    | 51.8    | 22      | 58.7    | 65.2    | 32.7    | 53.3    | 47      | 0.483779796 | 41.475   | 49.55     | 8.075    | 0.8370333   | 0.4454  | 1.243  |
| 101656_f_at | 7.9     | 8.2     | 22.1    | 10.7    | 6.2     | 50.8    | 7.6     | 15.5    | 0.520804139 | 12.225   | 20.025    | 7.8      | 0.610486891 | 0.6898  | 1.249  |
| 101657_at   | 22.4    | 21.5    | 30.8    | 25.8    | 26.5    | 69.8    | 21.7    | 44.5    | 0.250829967 | 25.125   | 40.625    | 15.5     | 0.618461538 | 0.2117  | 1.469  |
| 101658_f_at | 27.5    | 40.6    | 40.9    | 18.7    | 27.2    | 98.8    | 61.8    | 66.7    | 0.115925394 | 31.925   | 63.625    | 31.7     | 0.501768173 | 0.0989  | 1.899  |
| 101659_at   | 40.1    | 32.6    | 48.4    | 69.7    | 49.2    | 63.5    | 20.7    | 47.5    | 0.843434644 | 47.7     | 45.225    | 2.475    | 1.054726368 | 0.7674  | -1.095 |
| 101660_at   | 19.9    | 17      | 16.2    | 9.3     | 51.5    | 29.4    | 20.3    | 12.1    | 0.232645179 | 15.6     | 28.325    | 12.725   | 0.550750221 | 0.2026  | 1.643  |
| 101661_r_at | 6.5     | 20.3    | 10.5    | 18.9    | 21.8    | 23.3    | 22.7    | 18.4    | 0.105101256 | 14.05    | 21.55     | 7.5      | 0.651972158 | 0.1031  | 1.693  |
| 101662_at   | 51.3    | 62.9    | 66.6    | 57.4    | 61      | 72.8    | 64.9    | 75.9    | 0.106580132 | 59.55    | 68.65     | 9.1      | 0.867443554 | 0.1099  | 1.154  |
| 101663_s_at | 7.2     | 5.9     | 9.2     | 10.7    | 17.5    | 16.2    | 6.3     | 6.5     | 0.356325691 | 8.25     | 11.625    | 3.375    | 0.709677419 | 0.4346  | 1.294  |
| 101664_at   | 19182.8 | 19186.3 | 19357.3 | 17136.4 | 31547   | 16941.1 | 21831.1 | 19007.7 | 0.346310849 | 18715.7  | 22331.725 | 3616.025 | 0.838076772 | 0.3215  | 1.161  |
| 101665_at   | 4861.5  | 5108    | 4746.3  | 4855.6  | 4441.5  | 4595.3  | 4839.7  | 4265.4  | 0.054995019 | 4892.85  | 4535.475  | 357.375  | 1.078795496 | 0.04796 | -1.08  |
| 101666_at   | 5.6     | 4.2     | 3.7     | 4.7     | 5.6     | 6.6     | 8.4     | 4.2     | 0.161158001 | 4.55     | 6.2       | 1.65     | 0.733870968 | 0.1409  | 1.336  |
| 101667_at   | 9.6     | 12.2    | 7       | 8.5     | 17.4    | 9.6     | 11.5    | 8.5     | 0.336552938 | 9.325    | 11.75     | 2.425    | 0.793617021 | 0.3188  | 1.237  |
| 101668_at   | 61.4    | 24      | 74      | 76      | 38.3    | 81      | 74.5    | 87.6    | 0.507900892 | 58.85    | 70.35     | 11.5     | 0.836531628 | 0.5264  | 1.25   |
| 101669_at   | 16      | 34.3    | 44      | 18.7    | 14.1    | 32.6    | 22.3    | 23.9    | 0.540517013 | 28.25    | 23.225    | 5.025    | 1.216361679 | 0.6247  | -1.165 |
| 101670_at   | 17.2    | 32.6    | 21.8    | 35.4    | 47.5    | 28.2    | 38.4    | 50.1    | 0.07375189  | 26.75    | 41.05     | 14.3     | 0.651644336 | 0.08273 | 1.562  |
| 101671_at   | 5.8     | 4.2     | 3.6     | 8.9     | 8.8     | 5       | 7.2     | 3.2     | 0.811775979 | 5.625    | 6.05      | 0.425    | 0.929752066 | 0.8289  | -1.07  |
| 101672_at   | 1.7     | 1.7     | 2.1     | 1.9     | 3.2     | 2.4     | 2.2     | 1.8     | 0.15758402  | 1.85     | 2.4       | 0.55     | 0.770833333 | 0.108   | 1.278  |
| 101673_r_at | 2.5     | 9.1     | 8.5     | 12.4    | 7.8     | 6.8     | 18.9    | 1.8     | 0.873071562 | 8.125    | 8.825     | 0.7      | 0.920679887 | 0.8951  | -1.086 |
| 101674_at   | 33.4    | 11.4    | 28.4    | 39.9    | 16.1    | 49.8    | 29.9    | 43.5    | 0.524160277 | 28.275   | 34.825    | 6.55     | 0.811916726 | 0.5806  | 1.246  |
| 101675_at   | 161.9   | 152.5   | 220.6   | 192     | 199.6   | 244.9   | 258.5   | 224     | 0.048595796 | 181.75   | 231.75    | 50       | 0.78425027  | 0.04906 | 1.283  |
| 101676_at   | 998.1   | 1239.5  | 1097.3  | 930     | 1093    | 1376.8  | 1196.4  | 1955.3  | 0.17683195  | 1066.225 | 1405.375  | 339.15   | 0.75867651  | 0.1214  | 1.292  |
| 101677_at   | 184.9   | 179.1   | 220     | 221     | 196.1   | 213.6   | 220.8   | 293.1   | 0.278987575 | 201.25   | 230.9     | 29.65    | 0.871589433 | 0.2557  | 1.139  |
| 101678_r_at | 280.9   | 305.3   | 172.8   | 529.5   | 399.3   | 539.9   | 685.6   | 778.9   | 0.047639169 | 322.125  | 600.925   | 278.8    | 0.536048592 | 0.04891 | 1.957  |
| 101679_at   | 94.9    | 89.4    | 87.3    | 83.6    | 112.3   | 95.6    | 81.1    | 174.6   | 0.279864863 | 88.8     | 115.9     | 27.1     | 0.766177739 | 0.2279  | 1.252  |
| 101680_at   | 11768.1 | 11020.7 | 10086.5 | 8947.5  | 14134.1 | 9204.2  | 10541.4 | 9493.4  | 0.776469457 | 10455.7  | 10843.275 | 387.575  | 0.964256648 | 0.8238  | -1.027 |
| 101681_f_at | 329.2   | 257     | 294.5   | 257.5   | 298.3   | 384.8   | 380.8   | 166.8   | 0.691605856 | 284.55   | 307.675   | 23.125   | 0.924839522 | 0.8812  | -1.032 |
| 101682_f_at | 9.8     | 54.1    | 24.6    | 63.2    | 19.3    | 59      | 37      | 52.9    | 0.797708457 | 37.925   | 42.05     | 4.125    | 0.901902497 | 0.6359  | 1.281  |
| 101683_at   | 8.9     | 10.1    | 42      | 17      | 74.3    | 8.5     | 47.9    | 23.4    | 0.301773562 | 19.5     | 38.525    | 19.025   | 0.506164828 | 0.3503  | 1.819  |
| 101684_r_at | 461.6   | 580     | 477.7   | 601.7   | 884.9   | 689.8   | 633.9   | 599.1   | 0.068732519 | 530.25   | 701.925   | 171.675  | 0.755422588 | 0.04492 | 1.317  |
| 101685_f_at | 397.9   | 398.9   | 381.4   | 526     | 463.1   | 430.9   | 445.3   | 399.3   | 0.823899144 | 426.05   | 434.65    | 8.6      | 0.980213965 | 0.7472  | -1.027 |
| 101686_at   | 9.9     | 9.1     | 12.1    | 12.5    | 13.4    | 5.1     | 5.8     | 6.2     | 0.194195757 | 10.9     | 7.625     | 3.275    | 1.429508197 | 0.1144  | -1.535 |
| 101687_r_at | 21.1    | 21.4    | 10.4    | 31.1    | 19.9    | 50.2    | 24.6    | 43.2    | 0.171952956 | 21       | 34.475    | 13.475   | 0.609137056 | 0.1699  | 1.644  |
| 101688_at   | 57      | 56.6    | 50.5    | 73.1    | 88.7    | 45.6    | 45.6    | 72.1    | 0.766014514 | 59.3     | 63        | 3.7      | 0.941269841 | 0.8852  | -1.028 |
| 101689_at   | 6.4     | 8.3     | 10      | 5.2     | 4.1     | 6.7     | 7.4     | 6.9     | 0.391977238 | 7.475    | 6.275     | 1.2      | 1.19123506  | 0.4138  | -1.187 |
| 101690_r_at | 10.7    | 18.2    | 8.7     | 5.9     | 7.7     | 12.4    | 3.5     | 7.3     | 0.367723812 | 10.875   | 7.725     | 3.15     | 1.40776699  | 0.3548  | -1.42  |
| 101691_s_at | 16.9    | 30.9    | 16.5    | 5.5     | 6.5     | 25.1    | 18.7    | 10.3    | 0.742744495 | 17.45    | 15.15     | 2.3      | 1.151815182 | 0.8333  | -1.109 |
| 101692_r_at | 3.6     | 5.2     | 5.7     | 3.3     | 4.2     | 4.6     | 2.9     | 4.3     | 0.547786617 | 4.45     | 4         | 0.45     | 1.1125      | 0.575   | -1.104 |
| 101693_f_at | 18.3    | 27.3    | 7       | 9.5     | 33.9    | 21.3    | 8.4     | 30.6    | 0.31803634  | 15.525   | 23.55     | 8.025    | 0.659235669 | 0.3708  | 1.534  |
| 101694_f_at | 100.7   | 116.1   | 136.1   | 145.2   | 142.1   | 118.8   | 91.7    | 184.8   | 0.677551603 | 124.525  | 134.35    | 9.825    | 0.926870115 | 0.763   | -1.055 |
| 101695_at   | 52.6    | 52      | 84.6    | 101.3   | 45      | 77.3    | 43.8    | 42.2    | 0.221445886 | 72.625   | 52.075    | 20.55    | 1.39462314  | 0.1943  | -1.382 |
| 101696_r_at | 6.3     | 6.1     | 7.8     | 8.9     | 5.1     | 6.5     | 7.2     | 20.2    | 0.535189771 | 7.275    | 9.75      | 2.475    | 0.746153846 | 0.6607  | 1.158  |
| 101697_f_at | 109.7   | 187.1   | 142.7   | 148.4   | 212.5   | 132.8   | 157.9   | 94.6    | 0.936045758 | 146.975  | 149.45    | 2.475    | 0.983439277 | 0.9713  | -1.008 |
| 101698_f_at | 207.3   | 164.4   | 205.4   | 279.4   | 137.5   | 177.3   | 188.7   | 293.9   | 0.732463091 | 214.125  | 199.35    | 14.775   | 1.074115877 | 0.6472  | -1.097 |
| 101699_at   | 8.8     | 19.6    | 3       | 2.4     | 19.1    | 2.7     | 15.5    | 9.2     | 0.576746082 | 8.45     | 11.625    | 3.175    | 0.72688172  | 0.5217  | 1.561  |
| 101700_at   | 125     | 192.8   | 205.4   | 216.2   | 209.4   | 245.9   | 239.8   | 270.9   | 0.0655733   | 184.85   | 241.5     | 56.65    | 0.765424431 | 0.08152 | 1.329  |
| 101701_at   | 1.4     | 2.4     | 1.1     | 1.9     | 3.1     | 5.9     | 1.1     | 1.7     | 0.331399355 | 1.7      | 2.95      | 1.25     | 0.576271186 | 0.3476  | 1.514  |



|             |        |        |        |        |        |        |        |        |             |          |          |         |             |          |        |
|-------------|--------|--------|--------|--------|--------|--------|--------|--------|-------------|----------|----------|---------|-------------|----------|--------|
| 101702_at   | 9.3    | 7.7    | 16.7   | 7.4    | 13.7   | 14     | 11.3   | 9.2    | 0.505576829 | 10.275   | 12.05    | 1.775   | 0.852697095 | 0.3755   | 1.225  |
| 101703_at   | 501.1  | 398.5  | 447.3  | 380.3  | 506.9  | 387.7  | 468.9  | 459.4  | 0.539684831 | 431.8    | 455.725  | 23.925  | 0.947501234 | 0.5352   | -1.057 |
| 101704_at   | 18.9   | 44.9   | 7      | 17.5   | 13.8   | 20.2   | 6.7    | 6.6    | 0.304366595 | 22.075   | 11.825   | 10.25   | 1.866807611 | 0.2999   | -1.704 |
| 101705_at   | 41.2   | 115.7  | 34.4   | 90.4   | 59.4   | 71.7   | 66.6   | 122    | 0.709639422 | 70.425   | 79.925   | 9.5     | 0.881138567 | 0.5505   | 1.236  |
| 101706_at   | 6.3    | 14     | 11.7   | 5.3    | 6.6    | 14.7   | 13.2   | 11.9   | 0.439105656 | 9.325    | 11.6     | 2.275   | 0.80387931  | 0.4207   | 1.293  |
| 101707_at   | 189.4  | 206.4  | 196.8  | 219.2  | 210    | 280.4  | 272.2  | 266.9  | 0.035209815 | 202.95   | 257.375  | 54.425  | 0.788538125 | 0.01946  | 1.262  |
| 101708_at   | 113.9  | 105.6  | 118.8  | 118.9  | 101.3  | 117.3  | 138.2  | 78.6   | 0.699971299 | 114.3    | 108.85   | 5.45    | 1.050068902 | 0.5944   | -1.072 |
| 101709_at   | 26.9   | 11.9   | 15     | 7.4    | 15.4   | 13.5   | 40.4   | 51.9   | 0.218187896 | 15.3     | 30.3     | 15      | 0.504950495 | 0.1958   | 1.871  |
| 101710_at   | 17.5   | 51.6   | 36.6   | 17.4   | 40.3   | 33.6   | 50.8   | 35.9   | 0.359066067 | 30.775   | 40.15    | 9.375   | 0.766500623 | 0.2525   | 1.438  |
| 101711_at   | 9.8    | 26.1   | 10     | 34.8   | 27.4   | 6.7    | 45.7   | 28.1   | 0.527193224 | 20.175   | 26.975   | 6.8     | 0.747914736 | 0.6607   | 1.274  |
| 101712_at   | 251.5  | 247.8  | 257.4  | 311.4  | 283    | 220.9  | 297.5  | 265.1  | 0.986299317 | 267.025  | 266.625  | 0.4     | 1.001500234 | 0.9691   | -1.003 |
| 101713_at   | 9.5    | 19.9   | 7.6    | 23.1   | 8.6    | 15.2   | 16     | 29.4   | 0.708375906 | 15.025   | 17.3     | 2.275   | 0.86849711  | 0.6947   | 1.165  |
| 101714_at   | 8.5    | 8.2    | 9.5    | 11     | 48.5   | 9.2    | 7.9    | 24.7   | 0.25467713  | 9.3      | 22.575   | 13.275  | 0.411960133 | 0.2039   | 1.859  |
| 101715_at   | 11.5   | 25.1   | 32.7   | 6.7    | 47.8   | 7      | 8.9    | 45.6   | 0.543817451 | 19       | 27.325   | 8.325   | 0.695333943 | 0.7733   | 1.21   |
| 101716_at   | 17.9   | 4.6    | 13.2   | 19.6   | 17.1   | 13.5   | 13.9   | 6.5    | 0.800096329 | 13.825   | 12.75    | 1.075   | 1.084313725 | 0.9922   | -1.004 |
| 101717_at   | 532.1  | 388.4  | 601.2  | 472.5  | 367.3  | 371.6  | 524.2  | 588    | 0.635378652 | 498.55   | 462.775  | 35.775  | 1.077305386 | 0.6028   | -1.087 |
| 101718_f_at | 98.4   | 79.8   | 94     | 73.9   | 110.3  | 83.8   | 61.2   | 98.3   | 0.882795529 | 86.525   | 88.4     | 1.875   | 0.978789593 | 0.9721   | -1.005 |
| 101719_at   | 1687.6 | 2335.7 | 1743.2 | 1963.6 | 2615   | 1999.4 | 2277.1 | 1520.7 | 0.560707091 | 1932.525 | 2103.05  | 170.525 | 0.918915385 | 0.6107   | -1.076 |
| 101720_f_at | 70.3   | 30.3   | 48.5   | 44.5   | 70.7   | 61.7   | 88.4   | 83.2   | 0.039240167 | 48.4     | 76       | 27.6    | 0.636842105 | 0.04364  | 1.626  |
| 101723_r_at | 506.5  | 329.8  | 487.5  | 286.9  | 398.6  | 433.3  | 420.9  | 147.7  | 0.571099833 | 402.675  | 350.125  | 52.55   | 1.150089254 | 0.5361   | -1.214 |
| 101724_at   | 103.2  | 59.7   | 54.2   | 61.3   | 89.9   | 54.1   | 81.5   | 80.8   | 0.631491598 | 69.6     | 76.575   | 6.975   | 0.908912831 | 0.5645   | 1.119  |
| 101725_at   | 62.6   | 11.1   | 35.8   | 43.8   | 15.2   | 25.6   | 11.8   | 19.2   | 0.150761919 | 38.325   | 17.95    | 20.375  | 2.135097493 | 0.1769   | -1.873 |
| 101726_at   | 5      | 5.3    | 26     | 46.5   | 11.4   | 24.5   | 14.9   | 11.9   | 0.656009544 | 20.7     | 15.675   | 5.025   | 1.320574163 | 0.8613   | -1.114 |
| 101727_at   | 53.2   | 36.6   | 119.4  | 108.7  | 116.3  | 113.2  | 142.6  | 46.4   | 0.417540347 | 79.475   | 104.625  | 25.15   | 0.759617682 | 0.4458   | 1.362  |
| 101728_at   | 152.6  | 159.5  | 177.6  | 172    | 154.8  | 198.1  | 188.4  | 171.8  | 0.300363275 | 165.425  | 178.275  | 12.85   | 0.927920348 | 0.3053   | -1.075 |
| 101729_at   | 13.9   | 14.7   | 7.2    | 12.5   | 13.1   | 19.7   | 10.6   | 15     | 0.362521646 | 12.075   | 14.6     | 2.525   | 0.827054795 | 0.3728   | 1.222  |
| 101730_at   | 54.2   | 73.5   | 37.1   | 36.7   | 71.1   | 47.1   | 70.1   | 73     | 0.215308601 | 50.375   | 65.325   | 14.95   | 0.771144279 | 0.1942   | 1.333  |
| 101731_at   | 4.2    | 8.9    | 3.9    | 3.3    | 5.7    | 4.3    | 3.7    | 3.4    | 0.595360402 | 5.075    | 4.275    | 0.8     | 1.187134503 | 0.6491   | -1.124 |
| 101732_at   | 151.7  | 115.1  | 162    | 187.8  | 196.5  | 190.2  | 199.4  | 126.9  | 0.333537869 | 154.15   | 178.25   | 24.1    | 0.864796634 | 0.3706   | 1.155  |
| 101733_at   | 25.5   | 32.6   | 16.9   | 19.6   | 43.6   | 20.1   | 35.3   | 25.8   | 0.278513555 | 23.65    | 31.2     | 7.55    | 0.758012821 | 0.2825   | 1.303  |
| 101734_at   | 107.1  | 50.9   | 69.5   | 84.1   | 132.2  | 72.1   | 119.4  | 130.3  | 0.10284744  | 77.9     | 113.5    | 35.6    | 0.686343612 | 0.1209   | 1.469  |
| 101735_f_at | 59.9   | 51.6   | 81     | 75.2   | 100.4  | 83.5   | 45.3   | 60.2   | 0.714740609 | 66.925   | 72.35    | 5.425   | 0.925017277 | 0.821    | -1.05  |
| 101736_at   | 11.1   | 7.4    | 10.8   | 9.5    | 10.5   | 9.6    | 17.8   | 14.7   | 0.17110297  | 9.7      | 13.15    | 3.45    | 0.737642586 | 0.1442   | 1.331  |
| 101737_at   | 34.3   | 10.3   | 20.4   | 23.4   | 35.8   | 27.5   | 47.1   | 14.2   | 0.332700551 | 22.1     | 31.15    | 9.05    | 0.709470305 | 0.3794   | 1.407  |
| 101738_at   | 226.7  | 241.4  | 250.5  | 267.6  | 340.2  | 324.4  | 296.5  | 324.5  | 0.000982627 | 246.55   | 321.4    | 74.85   | 0.767112632 | 0.001055 | 1.304  |
| 101739_at   | 9.6    | 9      | 15.4   | 14.1   | 19.8   | 9.7    | 14.1   | 11.6   | 0.539689437 | 12.025   | 13.8     | 1.775   | 0.871376812 | 0.5546   | 1.135  |
| 101740_at   | 17.7   | 36.6   | 25.2   | 30.6   | 11.4   | 21.1   | 31.9   | 28.5   | 0.505204706 | 27.525   | 23.225   | 4.3     | 1.185145318 | 0.4863   | -1.229 |
| 101741_at   | 1563.4 | 2573.5 | 2421.4 | 2199   | 2482.3 | 2035   | 1999   | 2524.4 | 0.798402837 | 2189.325 | 2260.175 | 70.85   | 0.96865287  | 0.7452   | -1.044 |
| 101742_at   | 13.2   | 7.5    | 8.9    | 12.9   | 20.5   | 22.1   | 1.9    | 7.9    | 0.6565304   | 10.625   | 13.1     | 2.475   | 0.811068702 | 0.8325   | -1.14  |
| 101743_f_at | 64.9   | 30.4   | 74.5   | 87.6   | 81     | 74.4   | 77.6   | 56.2   | 0.58439327  | 64.35    | 72.3     | 7.95    | 0.890041494 | 0.4997   | 1.195  |
| 101744_i_at | 1.6    | 2.2    | 3.2    | 1.4    | 1.6    | 2.4    | 2.6    | 3.2    | 0.52845074  | 2.1      | 2.45     | 0.35    | 0.857142857 | 0.48     | 1.189  |
| 101745_f_at | 22     | 11.5   | 13.4   | 11.9   | 5.2    | 19.7   | 11.1   | 20.9   | 0.919178898 | 14.7     | 14.225   | 0.475   | 1.033391916 | 0.7166   | -1.146 |
| 101746_i_at | 0.9    | 0.6    | 2.3    | 1.2    | 0.9    | 1.3    | 0.9    | 1      | 0.593484458 | 1.25     | 1.025    | 0.225   | 1.219512195 | 0.8595   | -1.058 |
| 101747_f_at | 6.7    | 5.1    | 5.2    | 7.4    | 8.5    | 8.1    | 5      | 4.4    | 0.752114393 | 6.1      | 6.5      | 0.4     | 0.938461538 | 0.886    | -1.029 |
| 101748_at   | 166.7  | 217.9  | 241.9  | 169.7  | 267    | 214.1  | 213.5  | 185.1  | 0.438860896 | 199.05   | 219.925  | 20.875  | 0.905081278 | 0.4173   | 1.109  |
| 101749_at   | 13.2   | 1.4    | 4.9    | 1.6    | 1.1    | 4.4    | 16.6   | 3.1    | 0.826176686 | 5.275    | 6.3      | 1.025   | 0.837301587 | 0.858    | 1.153  |
| 101751_f_at | 50.7   | 74     | 42     | 58.5   | 40.1   | 33.3   | 69     | 30     | 0.285541124 | 56.3     | 43.1     | 13.2    | 1.306264501 | 0.2213   | -1.351 |
| 101752_f_at | 3.3    | 3.6    | 3.5    | 6.4    | 5.3    | 6.3    | 3.3    | 1.5    | 0.941347289 | 4.2      | 4.1      | 0.1     | 1.024390244 | 0.7737   | -1.111 |
| 101753_s_at | 419.9  | 387.8  | 542.8  | 371.2  | 604.5  | 461.4  | 445.2  | 415.2  | 0.406121915 | 430.425  | 481.575  | 51.15   | 0.893786015 | 0.3762   | -1.12  |
| 101754_f_at | 544.1  | 572.2  | 638.5  | 670.1  | 984.8  | 608.7  | 875.8  | 666.3  | 0.135164139 | 606.225  | 783.9    | 177.675 | 0.773344814 | 0.09689  | 1.273  |
| 101755_f_at | 234.3  | 214.9  | 416.5  | 246.7  | 480    | 354.4  | 474.6  | 283.6  | 0.122718628 | 278.1    | 398.15   | 120.05  | 0.698480472 | 0.1063   | 1.45   |
| 101756_f_at | 139.3  | 116.3  | 133.2  | 157.3  | 141.8  | 211    | 221.5  | 227.6  | 0.040738994 | 136.525  | 200.475  | 63.95   | 0.681007607 | 0.02617  | 1.452  |
| 101757_at   | 314.3  | 405.3  | 399    | 457.7  | 318.7  | 474    | 383    | 289.1  | 0.603123389 | 394.075  | 366.2    | 27.875  | 1.076119607 | 0.562    | -1.086 |
| 101758_at   | 16.4   | 19.5   | 63.6   | 20.5   | 14.7   | 21.6   | 18.4   | 22.6   | 0.414198372 | 30       | 19.325   | 10.675  | 1.552393273 | 0.41     | -1.333 |
| 101759_at   | 54.7   | 41.5   | 62.2   | 44.7   | 48.5   | 26     | 60     | 53.9   | 0.693149094 | 50.775   | 47.1     | 3.675   | 1.078025478 | 0.6215   | -1.115 |
| 101760_at   | 8.5    | 5.9    | 12.6   | 11.3   | 16.3   | 39.9   | 39.3   | 11.8   | 0.100818355 | 9.575    | 26.825   | 17.25   | 0.35694315  | 0.03744  | 2.557  |



|             |        |        |        |        |        |        |        |        |             |          |          |             |             |          |        |
|-------------|--------|--------|--------|--------|--------|--------|--------|--------|-------------|----------|----------|-------------|-------------|----------|--------|
| 101761_f_at | 46.2   | 45.4   | 44.4   | 30.3   | 45.5   | 34.6   | 41.4   | 37.6   | 0.702708362 | 41.575   | 39.775   | 1.8         | 1.045254557 | 0.7775   | -1.035 |
| 101762_at   | 14     | 17.6   | 63.9   | 32.7   | 26.4   | 14.1   | 63.9   | 15.7   | 0.90490267  | 32.05    | 30.025   | 2.025       | 1.067443797 | 0.8733   | -1.084 |
| 101763_at   | 607.9  | 550.4  | 806.8  | 736.8  | 863.3  | 698.9  | 738.2  | 709    | 0.319648954 | 675.475  | 752.35   | 76.875      | 0.897820163 | 0.2914   | 1.123  |
| 101764_at   | 189.9  | 152.9  | 227    | 267.4  | 206.5  | 178.3  | 242    | 243    | 0.790411018 | 209.3    | 217.45   | 8.15        | 0.96252012  | 0.7274   | -1.053 |
| 101765_at   | 538.2  | 816.7  | 730.3  | 589.1  | 766.5  | 747.1  | 832.3  | 1052   | 0.105219725 | 668.575  | 849.475  | 180.9       | 0.78704494  | 0.09582  | 1.276  |
| 101768_at   | 4.5    | 8.6    | 9.7    | 9.4    | 14.1   | 10.5   | 4      | 3.6    | 1           | 8.05     | 8.05     | 1.77636E-15 | 1           | 0.7652   | -1.129 |
| 101769_at   | 112    | 142.9  | 190    | 188.8  | 113.5  | 205    | 109.4  | 167.5  | 0.758875397 | 158.425  | 148.85   | 9.575       | 1.064326503 | 0.7207   | -1.077 |
| 101770_i_at | 10.3   | 3.2    | 8.9    | 6.5    | 4.5    | 10.6   | 5      | 4.2    | 0.615513904 | 7.225    | 6.075    | 1.15        | 1.189300412 | 0.6517   | -1.173 |
| 101771_r_at | 766.7  | 772.2  | 752.6  | 851.5  | 746    | 983.6  | 758.8  | 981.4  | 0.314106435 | 785.75   | 867.45   | 81.7        | 0.905815897 | 0.3087   | -1.095 |
| 101772_r_at | 93.5   | 98     | 114.5  | 33.6   | 109.2  | 65.5   | 91.7   | 121.9  | 0.594075037 | 84.9     | 97.075   | 12.175      | 0.874581509 | 0.5348   | 1.227  |
| 101773_r_at | 144.3  | 89.7   | 118.7  | 187.2  | 98.2   | 145.3  | 71.5   | 152.3  | 0.544888538 | 134.975  | 116.825  | 18.15       | 1.155360582 | 0.5398   | -1.166 |
| 101774_at   | 105.7  | 141.7  | 114.6  | 143.1  | 20     | 93.9   | 71.5   | 42.7   | 0.014967932 | 126.275  | 57.025   | 69.25       | 2.214379658 | 0.03585  | -2.557 |
| 101775_at   | 27.6   | 32.1   | 19.7   | 27.3   | 75.7   | 28.2   | 53.1   | 19.6   | 0.263567118 | 26.675   | 44.15    | 17.475      | 0.60419026  | 0.2774   | 1.469  |
| 101776_at   | 5.6    | 4.3    | 8.5    | 6.8    | 5.4    | 7      | 8.2    | 9.1    | 0.384941325 | 6.3      | 7.425    | 1.125       | 0.848484848 | 0.3757   | 1.192  |
| 101777_at   | 18.9   | 13     | 15.2   | 13.4   | 51.9   | 20.3   | 33.5   | 42.8   | 0.04446276  | 15.125   | 37.125   | 22          | 0.407407407 | 0.008239 | 2.345  |
| 101778_at   | 128.1  | 82.5   | 107.9  | 138.1  | 170.1  | 122.2  | 106.8  | 151.2  | 0.259880304 | 114.15   | 137.575  | 23.425      | 0.829729239 | 0.2672   | 1.209  |
| 101779_at   | 37.2   | 7.3    | 28.7   | 23     | 91.5   | 30.7   | 23.3   | 16.4   | 0.424476239 | 24.05    | 40.475   | 16.425      | 0.594193947 | 0.4188   | 1.566  |
| 101780_at   | 3.4    | 7.1    | 5.9    | 5.5    | 7.1    | 5.6    | 9      | 2.8    | 0.686949422 | 5.475    | 6.125    | 0.65        | 0.893877551 | 0.8493   | -1.061 |
| 101781_f_at | 1503.3 | 1203.8 | 1044.1 | 1490.1 | 1220.6 | 1405.2 | 1411.2 | 960.8  | 0.70719832  | 1310.325 | 1249.45  | 60.875      | 1.048721437 | 0.7178   | -1.049 |
| 101782_at   | 3.6    | 12.8   | 4      | 2      | 3      | 3.7    | 4      | 3.5    | 0.462937547 | 5.6      | 3.55     | 2.05        | 1.577464789 | 0.6017   | -1.244 |
| 101783_i_at | 3.1    | 9.7    | 15.8   | 5.6    | 5.6    | 11.2   | 10.7   | 15.1   | 0.560880276 | 8.55     | 10.65    | 2.1         | 0.802816901 | 0.4365   | 1.408  |
| 101784_f_at | 22.2   | 11.9   | 9.6    | 13.4   | 11.8   | 18.3   | 15     | 13.1   | 0.933050227 | 14.275   | 14.55    | 0.275       | 0.981099656 | 0.7914   | -1.057 |
| 101786_at   | 28.5   | 25.8   | 5.3    | 11.9   | 20.5   | 16.4   | 19.1   | 6.9    | 0.749155502 | 17.875   | 15.725   | 2.15        | 1.13672496  | 0.9838   | -1.01  |
| 101787_f_at | 1972.5 | 1737.1 | 1715.2 | 2036.1 | 2024.4 | 1672.6 | 1539.3 | 2746.2 | 0.671086352 | 1865.225 | 1995.625 | 130.4       | 0.934657062 | 0.7527   | -1.046 |
| 101788_f_at | 12.9   | 25.7   | 14.5   | 32.9   | 27.2   | 15.7   | 20.5   | 30.2   | 0.754330805 | 21.5     | 23.4     | 1.9         | 0.918803419 | 0.6481   | 1.138  |
| 101789_i_at | 49.8   | 34.4   | 55.8   | 37     | 71.8   | 20     | 73.7   | 64.1   | 0.389956685 | 44.25    | 57.4     | 13.15       | 0.770905923 | 0.6441   | 1.177  |
| 101790_f_at | 55.1   | 23     | 36.6   | 28.2   | 52.3   | 64.2   | 55.6   | 41.1   | 0.090773888 | 35.725   | 53.3     | 17.575      | 0.670262664 | 0.07908  | 1.558  |
| 101791_f_at | 196.2  | 205.7  | 176.2  | 207    | 228.6  | 182.8  | 149.1  | 249    | 0.810249777 | 196.275  | 202.375  | 6.1         | 0.969857937 | 0.9176   | -1.013 |
| 101792_at   | 16.6   | 7.4    | 14.3   | 4.9    | 15.8   | 15.5   | 2.7    | 14.7   | 0.755202677 | 10.8     | 12.175   | 1.375       | 0.887063655 | 0.957    | -1.03  |
| 101793_at   | 12.2   | 20     | 17.4   | 17.9   | 13.4   | 13.7   | 14.6   | 14     | 0.172537874 | 16.875   | 13.925   | 2.95        | 1.211849192 | 0.157    | -1.192 |
| 101794_f_at | 25.2   | 78     | 101.4  | 59.5   | 68.4   | 91.1   | 22.1   | 70.5   | 0.894620438 | 66.025   | 63.025   | 3           | 1.047600159 | 0.9116   | -1.052 |
| 101795_f_at | 159.9  | 101    | 165.2  | 163.6  | 138.6  | 216.3  | 164.3  | 179.2  | 0.271796623 | 147.425  | 174.6    | 27.175      | 0.844358534 | 0.2887   | 1.193  |
| 101796_at   | 13.3   | 11.9   | 17.9   | 12.5   | 18.6   | 14.2   | 9.3    | 10.9   | 0.802196505 | 13.9     | 13.25    | 0.65        | 1.049056604 | 0.7047   | -1.073 |
| 101797_at   | 5.8    | 4.4    | 7.9    | 7.4    | 8.6    | 7.9    | 5.7    | 12     | 0.214623856 | 6.375    | 8.55     | 2.175       | 0.745614035 | 0.2076   | 1.334  |
| 101798_at   | 32     | 44.6   | 35.3   | 17.5   | 14.3   | 14.8   | 29.2   | 49.2   | 0.604372133 | 32.35    | 26.875   | 5.475       | 1.20372093  | 0.4827   | -1.306 |
| 101799_at   | 10     | 15.4   | 12.6   | 9.5    | 26.1   | 15.3   | 13.5   | 14.2   | 0.169579132 | 11.875   | 17.275   | 5.4         | 0.687409551 | 0.106    | 1.431  |
| 101800_at   | 20.7   | 27.7   | 13.8   | 19.7   | 18.7   | 15.2   | 14     | 55.2   | 0.636447086 | 20.475   | 25.775   | 5.3         | 0.794374394 | 0.8133   | -1.09  |
| 101801_at   | 8      | 18.9   | 9.9    | 5.7    | 46.5   | 12.1   | 5.5    | 23.9   | 0.302149561 | 10.625   | 22       | 11.375      | 0.482954545 | 0.343    | 1.715  |
| 101802_at   | 20.9   | 9.6    | 2.3    | 12.2   | 1.4    | 13.2   | 3.5    | 11.3   | 0.450143098 | 11.25    | 7.35     | 3.9         | 1.530612245 | 0.4993   | -1.668 |
| 101803_at   | 7.4    | 3.6    | 6.6    | 5.2    | 11     | 7.8    | 9.5    | 3      | 0.327630795 | 5.7      | 7.825    | 2.125       | 0.728434505 | 0.4751   | 1.287  |
| 101804_at   | 6.5    | 9.8    | 26     | 18.7   | 12.2   | 36.7   | 8.3    | 11.3   | 0.821855639 | 15.25    | 17.125   | 1.875       | 0.890510949 | 0.8695   | -1.081 |
| 101805_f_at | 118.4  | 91.7   | 88.9   | 145.9  | 75.3   | 147.2  | 121.2  | 150.1  | 0.59741603  | 111.225  | 123.45   | 12.225      | 0.900972053 | 0.6672   | -1.094 |
| 101806_at   | 250.3  | 201.6  | 283.2  | 311.7  | 290.4  | 234.3  | 279.2  | 293.2  | 0.66518726  | 261.7    | 274.275  | 12.575      | 0.954151855 | 0.6227   | -1.057 |
| 101807_at   | 15.7   | 12.7   | 37     | 30.7   | 27.4   | 23.7   | 9.9    | 17.3   | 0.551812464 | 24.025   | 19.575   | 4.45        | 1.227330779 | 0.6219   | -1.195 |
| 101808_at   | 40.8   | 54     | 28.6   | 15.9   | 15.4   | 14.4   | 12.9   | 12.2   | 0.080952647 | 34.825   | 13.725   | 21.1        | 2.537340619 | 0.02067  | -2.312 |
| 101809_at   | 9.9    | 14.9   | 40.3   | 9.9    | 15.3   | 59.8   | 20.4   | 13.4   | 0.546703553 | 18.75    | 27.225   | 8.475       | 0.688705234 | 0.4727   | 1.438  |
| 101810_at   | 1034.4 | 814    | 1061.9 | 942.5  | 489.3  | 565.2  | 391.6  | 448.6  | 0.000643565 | 963.2    | 473.675  | 489.525     | 2.033461762 | 0.000336 | -2.041 |
| 101811_at   | 21.8   | 20.3   | 18.4   | 13.8   | 33.4   | 19.4   | 22.5   | 19.8   | 0.225592765 | 18.575   | 23.775   | 5.2         | 0.78128286  | 0.1917   | 1.267  |
| 101814_at   | 14.2   | 14.1   | 36.5   | 30.7   | 21     | 20.5   | 20.7   | 14.2   | 0.474553732 | 23.875   | 19.1     | 4.775       | 1.25        | 0.6109   | -1.155 |
| 101815_at   | 36.3   | 9.4    | 30.5   | 25.7   | 22.4   | 29.3   | 6.4    | 19.2   | 0.445196576 | 25.475   | 19.325   | 6.15        | 1.318240621 | 0.5316   | -1.35  |
| 101816_at   | 27.2   | 21.8   | 17.7   | 15.2   | 5.3    | 18     | 45.9   | 41.8   | 0.514715724 | 20.475   | 27.75    | 7.275       | 0.737837838 | 0.9511   | -1.034 |
| 101820_at   | 10     | 35.9   | 16.7   | 28.4   | 28.8   | 28.1   | 38.6   | 13.4   | 0.586673451 | 22.75    | 27.225   | 4.475       | 0.835629017 | 0.5588   | 1.253  |
| 101821_at   | 12.7   | 13.9   | 21.9   | 19.6   | 21.3   | 17.4   | 12.6   | 17.4   | 0.959695672 | 17.025   | 17.175   | 0.15        | 0.991266376 | 0.9303   | -1.016 |
| 101822_at   | 81.1   | 65     | 52.5   | 32.8   | 34.6   | 100.1  | 114.1  | 57.6   | 0.417106031 | 57.85    | 76.6     | 18.75       | 0.755221932 | 0.5173   | 1.259  |
| 101823_at   | 39.7   | 19.8   | 39.7   | 61.6   | 46.1   | 38.4   | 54.5   | 42.1   | 0.611224483 | 40.2     | 45.275   | 5.075       | 0.887907234 | 0.4733   | 1.207  |
| 101824_at   | 21     | 5.2    | 15.1   | 5.4    | 7.8    | 16.2   | 5.2    | 12.1   | 0.779344911 | 11.675   | 10.325   | 1.35        | 1.130750605 | 0.9489   | -1.029 |



|             |         |         |         |         |         |         |         |         |             |           |           |         |             |          |        |
|-------------|---------|---------|---------|---------|---------|---------|---------|---------|-------------|-----------|-----------|---------|-------------|----------|--------|
| 101825_at   | 8.3     | 8.2     | 31.6    | 27.1    | 46.4    | 11.2    | 44.1    | 13.8    | 0.412561224 | 18.8      | 28.875    | 10.075  | 0.651082251 | 0.4486   | 1.531  |
| 101826_at   | 4.7     | 2.2     | 9.9     | 7.1     | 1.4     | 10.8    | 16.9    | 7       | 0.446113089 | 5.975     | 9.025     | 3.05    | 0.662049861 | 0.7263   | 1.258  |
| 101827_at   | 33.3    | 19.8    | 50.7    | 60.8    | 55.9    | 86.6    | 82.3    | 45.4    | 0.099633809 | 41.15     | 67.55     | 26.4    | 0.609178386 | 0.1127   | 1.725  |
| 101828_at   | 29.4    | 61.2    | 80.3    | 23.5    | 7       | 4.6     | 7.1     | 5.2     | 0.050101425 | 48.6      | 5.975     | 42.625  | 8.133891213 | 0.0007   | -7.268 |
| 101829_at   | 39.2    | 51.6    | 55.5    | 59.6    | 19.4    | 31.8    | 69.1    | 79.4    | 0.923676241 | 51.475    | 49.925    | 1.55    | 1.03104657  | 0.6393   | -1.185 |
| 101830_at   | 139     | 125     | 124.8   | 128.1   | 124.4   | 135.7   | 149.3   | 125.4   | 0.534337312 | 129.225   | 133.7     | 4.475   | 0.966529544 | 0.5384   | -1.033 |
| 101831_at   | 92.1    | 17.1    | 99.4    | 110.9   | 61.1    | 82.4    | 72.5    | 72.7    | 0.744728754 | 79.875    | 72.175    | 7.7     | 1.10668514  | 0.8207   | 1.112  |
| 101834_at   | 386.5   | 516.1   | 599.7   | 442.4   | 453.2   | 469.8   | 312.7   | 624.8   | 0.799174086 | 486.175   | 465.125   | 21.05   | 1.045256651 | 0.7368   | -1.062 |
| 101835_at   | 79.9    | 96.6    | 61      | 79.2    | 94.6    | 66      | 72.7    | 111.6   | 0.601652767 | 79.175    | 86.225    | 7.05    | 0.91823717  | 0.6355   | -1.079 |
| 101836_at   | 111.3   | 158.7   | 118.7   | 93.4    | 116.6   | 198.8   | 116.1   | 169.2   | 0.280494643 | 120.525   | 150.175   | 29.65   | 0.802563676 | 0.2724   | 1.235  |
| 101837_g_at | 757.4   | 936.7   | 878.7   | 819.5   | 586.1   | 1043.8  | 604     | 792.2   | 0.466791316 | 848.075   | 756.525   | 91.55   | 1.121013846 | 0.366    | -1.149 |
| 101838_r_at | 269.5   | 264.8   | 299     | 201.6   | 237.1   | 293.4   | 280.3   | 269.1   | 0.656433268 | 258.725   | 269.975   | 11.25   | 0.958329475 | 0.6226   | -1.051 |
| 101839_at   | 11.4    | 21.3    | 13.3    | 14.8    | 2.3     | 3.1     | 24      | 22.5    | 0.743543153 | 15.2      | 12.975    | 2.225   | 1.171483622 | 0.3649   | -1.874 |
| 101840_at   | 129.6   | 124.8   | 119.6   | 136.5   | 146.8   | 120.7   | 97      | 153     | 0.902990344 | 127.625   | 129.375   | 1.75    | 0.98647343  | 0.993    | -1.001 |
| 101841_at   | 30.5    | 28.2    | 57.3    | 41.8    | 51.3    | 50.4    | 80.6    | 54.7    | 0.08972765  | 39.45     | 59.25     | 19.8    | 0.665822785 | 0.07253  | 1.532  |
| 101842_g_at | 226.7   | 193.4   | 205     | 186     | 212.4   | 253.8   | 173.8   | 227.6   | 0.492167045 | 202.775   | 216.9     | 14.125  | 0.934877824 | 0.5256   | -1.063 |
| 101843_at   | 225.3   | 379.1   | 293.9   | 321     | 325.7   | 358     | 261.2   | 334.6   | 0.708280207 | 304.825   | 319.875   | 15.05   | 0.952950371 | 0.6637   | -1.06  |
| 101844_at   | 134.1   | 137.3   | 169.1   | 194.1   | 156.3   | 261.7   | 206.1   | 205.4   | 0.115414596 | 158.65    | 207.375   | 48.725  | 0.76503918  | 0.1036   | 1.301  |
| 101845_s_at | 2       | 11.8    | 5.4     | 2.2     | 5.4     | 2.3     | 1.7     | 13.6    | 0.914516834 | 5.35      | 5.75      | 0.4     | 0.930434783 | 0.9873   | -1.01  |
| 101846_r_at | 6.5     | 38.3    | 37.4    | 34.6    | 11.2    | 25.7    | 6.6     | 47      | 0.599690694 | 29.2      | 22.625    | 6.575   | 1.290607735 | 0.6193   | -1.379 |
| 101847_at   | 17.8    | 24.3    | 6.6     | 30.3    | 12.8    | 27.1    | 25.3    | 35.8    | 0.458561239 | 19.75     | 25.25     | 5.5     | 0.782178218 | 0.4521   | 1.38   |
| 101848_g_at | 16      | 17.3    | 30.7    | 50.7    | 5.3     | 30.2    | 48      | 44.4    | 0.802435973 | 28.675    | 31.975    | 3.3     | 0.896794371 | 0.9216   | -1.062 |
| 101850_at   | 270.9   | 244.6   | 213     | 210.4   | 280.6   | 301.9   | 287.7   | 304.1   | 0.019649886 | 234.725   | 293.575   | 58.85   | 0.799540152 | 0.01111  | 1.257  |
| 101851_at   | 847.6   | 815.8   | 936.8   | 1022.8  | 870.8   | 883.2   | 915     | 701.7   | 0.382058331 | 905.75    | 842.675   | 63.075  | 1.074850921 | 0.3875   | -1.076 |
| 101853_f_at | 184     | 154.8   | 147.9   | 174.1   | 153.2   | 225.1   | 238.7   | 172     | 0.222803835 | 165.2     | 197.25    | 32.05   | 0.837515843 | 0.2122   | 1.179  |
| 101854_r_at | 164.3   | 377.4   | 357.6   | 362.4   | 464.5   | 418.7   | 290.2   | 140.8   | 0.88753281  | 315.425   | 328.55    | 13.125  | 0.960051743 | 0.9941   | -1.003 |
| 101855_at   | 190.6   | 212.7   | 165.7   | 84.4    | 181.9   | 136.9   | 134.1   | 110.1   | 0.511328806 | 163.35    | 140.75    | 22.6    | 1.160568384 | 0.6568   | -1.114 |
| 101856_at   | 136.6   | 218.1   | 190.7   | 179.5   | 219.4   | 257.1   | 224.9   | 255.1   | 0.03317586  | 181.225   | 239.125   | 57.9    | 0.757867224 | 0.03528  | 1.335  |
| 101857_at   | 295.5   | 301.1   | 369     | 313.5   | 205.8   | 390.2   | 240.3   | 301.2   | 0.463976584 | 319.775   | 284.375   | 35.4    | 1.124483516 | 0.3725   | -1.154 |
| 101858_at   | 259.1   | 476.7   | 417.4   | 484.6   | 452     | 439.5   | 498.1   | 530.9   | 0.27925543  | 409.45    | 480.125   | 70.675  | 0.85279875  | 0.2702   | 1.204  |
| 101859_at   | 29.4    | 35.7    | 39.9    | 17.5    | 29.9    | 13.4    | 46      | 17      | 0.665594463 | 30.625    | 26.575    | 4.05    | 1.152398871 | 0.5476   | -1.236 |
| 101860_at   | 116.4   | 81.8    | 74.1    | 96.8    | 83.4    | 222     | 113.1   | 96.6    | 0.338662231 | 92.275    | 128.775   | 36.5    | 0.716559891 | 0.2976   | 1.312  |
| 101861_at   | 1903.6  | 1791.6  | 1615.5  | 1700.2  | 1889.5  | 1712.2  | 1722.1  | 2011.3  | 0.42586504  | 1752.725  | 1833.775  | 81.05   | 0.955801557 | 0.4255   | -1.046 |
| 101862_at   | 8       | 11.5    | 9.9     | 9.1     | 16.2    | 7.6     | 9.3     | 11.8    | 0.471360682 | 9.625     | 11.225    | 1.6     | 0.857461024 | 0.5112   | 1.132  |
| 101863_at   | 24.5    | 18.8    | 5.1     | 12.8    | 20.2    | 29      | 16.6    | 30.4    | 0.154671512 | 15.3      | 24.05     | 8.75    | 0.636174636 | 0.1763   | 1.773  |
| 101864_at   | 38.6    | 25.7    | 22.6    | 27.2    | 26.2    | 22.3    | 29.8    | 77.9    | 0.485887999 | 28.525    | 39.05     | 10.525  | 0.730473752 | 0.5331   | 1.222  |
| 101865_at   | 96.9    | 99.4    | 92.2    | 94.6    | 107.6   | 109.7   | 50.3    | 85.4    | 0.624513369 | 95.775    | 88.25     | 7.525   | 1.085269122 | 0.5149   | -1.134 |
| 101866_at   | 490.7   | 386.6   | 388     | 436.3   | 276.8   | 432.6   | 296.1   | 409.4   | 0.182674872 | 425.4     | 353.725   | 71.675  | 1.202629161 | 0.1665   | -1.22  |
| 101867_at   | 786.8   | 843.2   | 841.4   | 848.9   | 931.7   | 856.9   | 937.5   | 1017.6  | 0.040400964 | 830.075   | 935.925   | 105.85  | 0.886903331 | 0.02363  | -1.126 |
| 101868_i_at | 94.1    | 91.1    | 109.1   | 108     | 46      | 35.4    | 115.1   | 26      | 0.110494916 | 100.575   | 55.625    | 44.95   | 1.808089888 | 0.0579   | -2.134 |
| 101869_s_at | 17029.6 | 16777.7 | 15269.4 | 11216.6 | 25170.5 | 12526.3 | 15899.8 | 18339.3 | 0.381057265 | 15073.325 | 17983.975 | 2910.65 | 0.838153134 | 0.4029   | 1.171  |
| 101870_at   | 4.9     | 6.7     | 6.5     | 9.2     | 11      | 6.5     | 7.1     | 7.1     | 0.451327496 | 6.825     | 7.925     | 1.1     | 0.861198738 | 0.443    | 1.155  |
| 101871_f_at | 11.6    | 5.2     | 7.7     | 6.7     | 9.4     | 5.5     | 7.5     | 4.5     | 0.562040159 | 7.8       | 6.725     | 1.075   | 1.159851301 | 0.5438   | -1.161 |
| 101872_at   | 1331.3  | 1044.7  | 1444.1  | 1431.6  | 1930.6  | 1124.5  | 1336.9  | 1184.7  | 0.712050526 | 1312.925  | 1394.175  | 81.25   | 0.941721807 | 0.7659   | -1.046 |
| 101873_at   | 48      | 34.8    | 47.1    | 45.6    | 52.7    | 42.8    | 42.2    | 52      | 0.429016069 | 43.875    | 47.425    | 3.55    | 0.925144966 | 0.4364   | -1.083 |
| 101874_s_at | 3.9     | 2.7     | 15.9    | 6.6     | 8.4     | 1.7     | 2.3     | 1.9     | 0.329557894 | 7.275     | 3.575     | 3.7     | 2.034965035 | 0.2289   | -2.049 |
| 101875_at   | 522.6   | 399.7   | 425.2   | 323.6   | 527     | 488.5   | 492.4   | 445.3   | 0.187521948 | 417.775   | 488.3     | 70.525  | 0.855570346 | 0.1575   | 1.184  |
| 101876_s_at | 647     | 588.8   | 617.5   | 603.3   | 491.8   | 716.7   | 530.8   | 858.9   | 0.707853521 | 614.15    | 649.55    | 35.4    | 0.945500731 | 0.8218   | -1.031 |
| 101877_at   | 2037.9  | 1555.8  | 1875.6  | 1462.5  | 1252.4  | 1297.7  | 946.3   | 1002.3  | 0.012139591 | 1732.95   | 1124.675  | 608.275 | 1.540845133 | 0.007953 | -1.541 |
| 101878_at   | 23.7    | 22.3    | 19.7    | 18.8    | 21.6    | 27.5    | 22.9    | 19.6    | 0.418795788 | 21.125    | 22.9      | 1.775   | 0.922489083 | 0.425    | -1.08  |
| 101879_s_at | 513.8   | 497     | 541.9   | 450.3   | 564.9   | 597.7   | 670.4   | 501.2   | 0.098212919 | 500.75    | 583.55    | 82.8    | 0.858109845 | 0.08239  | 1.162  |
| 101880_at   | 20.3    | 43.2    | 43.4    | 40.7    | 17.8    | 17.5    | 22.1    | 23.9    | 0.053911459 | 36.9      | 20.325    | 16.575  | 1.815498155 | 0.03113  | -1.751 |
| 101881_g_at | 553.9   | 1239.2  | 846.4   | 811.6   | 1371.3  | 1108.1  | 1473.7  | 773.3   | 0.181725066 | 862.775   | 1181.6    | 318.825 | 0.730175186 | 0.1884   | 1.384  |
| 101882_s_at | 516.9   | 949.7   | 703.9   | 856.2   | 814.1   | 923.9   | 997.5   | 795.6   | 0.293721557 | 756.675   | 882.775   | 126.1   | 0.857154994 | 0.269    | 1.192  |
| 101883_s_at | 439.4   | 515.6   | 456.3   | 515.1   | 264.3   | 499.7   | 451.1   | 480.4   | 0.37610046  | 481.6     | 423.875   | 57.725  | 1.136184017 | 0.354    | -1.168 |
| 101884_at   | 74.1    | 65.7    | 91.2    | 74.2    | 60.3    | 100.7   | 99.5    | 80.1    | 0.457093161 | 76.3      | 85.15     | 8.85    | 0.896065766 | 0.5115   | -1.101 |



|             |        |        |        |        |        |        |        |        |             |          |          |         |             |          |        |
|-------------|--------|--------|--------|--------|--------|--------|--------|--------|-------------|----------|----------|---------|-------------|----------|--------|
| 101885_at   | 12.6   | 31.9   | 38.2   | 17.6   | 24.2   | 22.5   | 36.2   | 16.7   | 0.981636274 | 25.075   | 24.9     | 0.175   | 1.007028112 | 0.8769   | -1.05  |
| 101886_f_at | 382.7  | 415.1  | 434.6  | 329.7  | 439.1  | 739.1  | 496.5  | 582.5  | 0.07049466  | 390.525  | 564.3    | 173.775 | 0.6920521   | 0.03235  | 1.425  |
| 101887_at   | 202.1  | 214.2  | 299.1  | 121    | 371.3  | 278.8  | 312.3  | 343.4  | 0.040061829 | 209.1    | 326.45   | 117.35  | 0.64052688  | 0.04735  | 1.631  |
| 101888_at   | 8.3    | 7.1    | 11.5   | 4.4    | 19.8   | 9.5    | 3.3    | 4      | 0.762434684 | 7.825    | 9.15     | 1.325   | 0.855191257 | 0.9226   | -1.047 |
| 101889_s_at | 258.1  | 242    | 226.2  | 188.2  | 116.1  | 149.2  | 129.7  | 95.3   | 0.001675635 | 228.625  | 122.575  | 106.05  | 1.865184581 | 0.001662 | -1.877 |
| 101890_f_at | 1022.5 | 906.2  | 903.4  | 1041.4 | 1015   | 1062.9 | 1143.7 | 1131.2 | 0.047246074 | 968.375  | 1088.2   | 119.825 | 0.889886969 | 0.04727  | 1.125  |
| 101891_at   | 20.4   | 23.4   | 9.3    | 18.2   | 40     | 11.5   | 9.2    | 12.5   | 0.954782913 | 17.825   | 18.3     | 0.475   | 0.974043716 | 0.7925   | -1.113 |
| 101892_f_at | 201.6  | 196.3  | 221.7  | 244    | 298.2  | 212.4  | 202.5  | 214.2  | 0.552705142 | 215.9    | 231.825  | 15.925  | 0.931305942 | 0.5612   | -1.065 |
| 101893_r_at | 4.4    | 0.5    | 0.5    | 0.6    | 15.7   | 3      | 0.5    | 8.1    | 0.211852048 | 1.5      | 6.825    | 5.325   | 0.21978022  | 0.1623   | 4.263  |
| 101894_s_at | 265.5  | 195    | 215.2  | 181.3  | 188.5  | 273.7  | 192.2  | 231    | 0.802502613 | 214.25   | 221.35   | 7.1     | 0.967924102 | 0.8047   | -1.032 |
| 101896_at   | 50.1   | 12     | 34.7   | 11.6   | 10.1   | 14.7   | 46.9   | 45.6   | 0.875224673 | 27.1     | 29.325   | 2.225   | 0.924126172 | 0.903    | -1.071 |
| 101897_g_at | 458    | 442.7  | 567.5  | 454.8  | 466.7  | 653    | 560.1  | 603.4  | 0.120704369 | 480.75   | 570.8    | 90.05   | 0.842238963 | 0.1155   | 1.184  |
| 101898_s_at | 174.3  | 124.4  | 186.6  | 174.8  | 153.8  | 170.6  | 147.2  | 152.4  | 0.575066681 | 165.025  | 156      | 9.025   | 1.057852564 | 0.6506   | -1.047 |
| 101899_at   | 3.5    | 13.9   | 7.5    | 6.2    | 8.1    | 13.6   | 8.3    | 8.4    | 0.510936395 | 7.775    | 9.6      | 1.825   | 0.809895833 | 0.3661   | 1.354  |
| 101900_at   | 22.6   | 17     | 13.3   | 21     | 51.7   | 25.9   | 10.3   | 19.2   | 0.424846327 | 18.475   | 26.775   | 8.3     | 0.690009337 | 0.5492   | 1.253  |
| 101901_at   | 708.8  | 741.7  | 709.7  | 616.3  | 734.9  | 672.6  | 738.7  | 607.7  | 0.895135462 | 694.125  | 688.475  | 5.65    | 1.008206543 | 0.8885   | -1.009 |
| 101902_at   | 427.3  | 388    | 432.3  | 367.2  | 313.1  | 433.9  | 389.7  | 356.7  | 0.358193088 | 403.7    | 373.35   | 30.35   | 1.081291014 | 0.3368   | -1.087 |
| 101903_at   | 8.7    | 7.6    | 26     | 5.7    | 14.2   | 10     | 13.1   | 16.5   | 0.78393976  | 12       | 13.45    | 1.45    | 0.892193309 | 0.4458   | 1.329  |
| 101904_at   | 33.1   | 56.6   | 9.6    | 59.5   | 59.4   | 55     | 33.4   | 44.9   | 0.547057138 | 39.7     | 48.175   | 8.475   | 0.824078879 | 0.425    | 1.462  |
| 101905_at   | 788.8  | 522.5  | 482    | 592.5  | 622.6  | 631.5  | 514.8  | 591.4  | 0.934757598 | 596.45   | 590.075  | 6.375   | 1.010803711 | 0.9727   | -1.004 |
| 101906_at   | 3135.5 | 2856.1 | 2721.9 | 2757.4 | 2928   | 2148.6 | 2372.3 | 2434.7 | 0.09268926  | 2867.725 | 2470.9   | 396.825 | 1.160599377 | 0.0767   | -1.166 |
| 101907_s_at | 70.9   | 46.5   | 73.4   | 49.6   | 25.6   | 48.8   | 77.5   | 95     | 0.927706276 | 60.1     | 61.725   | 1.625   | 0.973673552 | 0.8395   | -1.069 |
| 101908_s_at | 19.8   | 20.4   | 63.3   | 33.9   | 57.7   | 41.4   | 52.3   | 65.7   | 0.148340022 | 34.35    | 54.275   | 19.925  | 0.63288807  | 0.1001   | 1.755  |
| 101909_f_at | 26.1   | 45.6   | 44.6   | 39.1   | 11.1   | 39.9   | 10.8   | 84     | 0.900496716 | 38.85    | 36.45    | 2.4     | 1.065843621 | 0.4613   | -1.506 |
| 101910_f_at | 10.3   | 13.5   | 31.6   | 9.8    | 58.4   | 10.5   | 11.6   | 13.6   | 0.599919899 | 16.3     | 23.525   | 7.225   | 0.692879915 | 0.6894   | 1.226  |
| 101912_at   | 53.7   | 35.8   | 35.1   | 45.3   | 73.4   | 53.1   | 25.1   | 91.3   | 0.294582289 | 42.475   | 60.725   | 18.25   | 0.6994648   | 0.4048   | 1.308  |
| 101913_at   | 1117.6 | 832.4  | 734.9  | 859.3  | 631.3  | 897.9  | 802.7  | 836.7  | 0.386572309 | 886.05   | 792.15   | 93.9    | 1.118538156 | 0.3883   | -1.115 |
| 101914_at   | 814    | 848.8  | 1002.6 | 831.4  | 975.9  | 990.3  | 1101.2 | 1082.3 | 0.025584273 | 874.2    | 1037.425 | 163.225 | 0.842663325 | 0.02222  | 1.189  |
| 101916_at   | 227.8  | 241.2  | 287.4  | 281.2  | 307.9  | 280.3  | 267.8  | 359.8  | 0.131852412 | 259.4    | 303.95   | 44.55   | 0.85342984  | 0.1204   | 1.17   |
| 101917_at   | 2.9    | 5      | 16.1   | 3.1    | 44.8   | 17.6   | 21.6   | 4.2    | 0.168809738 | 6.775    | 22.05    | 15.275  | 0.307256236 | 0.1197   | 3.147  |
| 101918_at   | 29.5   | 151.7  | 36.8   | 57.7   | 14.5   | 39.4   | 24.9   | 14.9   | 0.205502024 | 68.925   | 23.425   | 45.5    | 2.942369264 | 0.07106  | -2.587 |
| 101919_at   | 735.4  | 513.7  | 611.9  | 802.7  | 494    | 541.2  | 472.5  | 814.4  | 0.436136514 | 665.925  | 580.525  | 85.4    | 1.147108221 | 0.3899   | -1.159 |
| 101920_at   | 293.9  | 180.6  | 294.5  | 192.3  | 196    | 184    | 268    | 171.1  | 0.389678901 | 240.325  | 204.775  | 35.55   | 1.173605176 | 0.4008   | -1.161 |
| 101921_at   | 572.1  | 477    | 528.2  | 434.8  | 397.6  | 482.4  | 373.6  | 579.6  | 0.455768737 | 503.025  | 458.3    | 44.725  | 1.097588916 | 0.4096   | -1.108 |
| 101922_at   | 636.3  | 700.8  | 504.8  | 774.9  | 1132.9 | 523    | 658.4  | 849.7  | 0.395081106 | 654.2    | 791      | 136.8   | 0.827054362 | 0.4304   | 1.174  |
| 101923_at   | 223.9  | 157.9  | 200    | 221.3  | 133.4  | 150.9  | 132    | 164.6  | 0.026988922 | 200.775  | 145.225  | 55.55   | 1.382509898 | 0.01646  | -1.375 |
| 101924_at   | 116.8  | 129.5  | 125.5  | 150.7  | 110.9  | 147.3  | 100.4  | 127.3  | 0.495164028 | 130.625  | 121.475  | 9.15    | 1.075324141 | 0.4576   | -1.082 |
| 101926_at   | 113    | 111    | 153.1  | 201.2  | 139.8  | 147.8  | 172.2  | 187.2  | 0.507507129 | 144.575  | 161.75   | 17.175  | 0.89381762  | 0.4176   | 1.146  |
| 101927_at   | 322.6  | 330.1  | 383.5  | 392.5  | 363.9  | 353.7  | 342.2  | 410.7  | 0.671506456 | 357.175  | 367.625  | 10.45   | 0.971574294 | 0.6545   | -1.031 |
| 101928_at   | 13     | 9.7    | 8.9    | 20.2   | 20     | 17.1   | 15     | 13.3   | 0.304365327 | 12.95    | 16.35    | 3.4     | 0.79204893  | 0.2246   | 1.319  |
| 101929_at   | 938    | 1656.3 | 1364.8 | 1385.2 | 1425.5 | 2104.7 | 1765.5 | 1883.2 | 0.066896301 | 1336.075 | 1794.725 | 458.65  | 0.744445528 | 0.07951  | 1.357  |
| 101930_at   | 400.5  | 1388   | 766.2  | 703.4  | 781.4  | 963.3  | 876.2  | 720.7  | 0.927739653 | 814.525  | 835.4    | 20.875  | 0.97501197  | 0.6753   | 1.122  |
| 101931_at   | 1729.5 | 1337.9 | 1738.8 | 1600.2 | 1178.1 | 1730.2 | 1576.5 | 1342.1 | 0.385590687 | 1601.6   | 1456.725 | 144.875 | 1.099452539 | 0.3765   | -1.105 |
| 101932_at   | 373.8  | 478.7  | 378.6  | 519    | 358.3  | 446    | 355    | 486.5  | 0.613302823 | 437.525  | 411.45   | 26.075  | 1.063373435 | 0.616    | -1.062 |
| 101933_at   | 516.1  | 642.4  | 536.9  | 838.7  | 406.8  | 595.5  | 522.3  | 596.6  | 0.285621799 | 633.525  | 530.3    | 103.225 | 1.194653969 | 0.2773   | -1.186 |
| 101934_at   | 351.4  | 406.1  | 402.2  | 408.9  | 313    | 492.5  | 521.4  | 404    | 0.460470319 | 392.15   | 432.725  | 40.575  | 0.906233751 | 0.5266   | -1.085 |
| 101936_at   | 535.1  | 424.4  | 398    | 483.6  | 314.3  | 537.5  | 440.9  | 644.5  | 0.76936384  | 460.275  | 484.3    | 24.025  | 0.950392319 | 0.8932   | -1.024 |
| 101937_s_at | 230    | 166.7  | 193.3  | 189    | 145    | 219.8  | 126.5  | 178.9  | 0.313869672 | 194.75   | 167.55   | 27.2    | 1.1623396   | 0.2742   | -1.181 |
| 101938_at   | 80.5   | 130.9  | 147.2  | 160.1  | 135.4  | 166.3  | 135.4  | 148.4  | 0.426950822 | 129.675  | 146.375  | 16.7    | 0.885909479 | 0.3889   | 1.162  |
| 101939_at   | 1574.2 | 1121   | 1591.4 | 1488.2 | 938.9  | 1334.9 | 1178.5 | 1125.6 | 0.075297339 | 1443.7   | 1144.475 | 299.225 | 1.261451757 | 0.08109  | -1.259 |
| 101940_at   | 596.1  | 627.4  | 566.3  | 571.7  | 618.1  | 715.7  | 651.7  | 499.3  | 0.555736834 | 590.375  | 621.2    | 30.825  | 0.9503783   | 0.6075   | -1.044 |
| 101942_at   | 424    | 585.3  | 507.7  | 557.2  | 504.2  | 569.7  | 457    | 633    | 0.682615837 | 518.55   | 540.975  | 22.425  | 0.958547068 | 0.6898   | -1.043 |
| 101943_at   | 718.9  | 629.5  | 648.5  | 656.9  | 487.3  | 664.5  | 659.1  | 525.4  | 0.183207359 | 663.45   | 584.075  | 79.375  | 1.135898643 | 0.158    | -1.145 |
| 101944_at   | 844.6  | 898.7  | 1130.8 | 930    | 953.1  | 1036.7 | 850    | 830.3  | 0.686418091 | 951.025  | 917.525  | 33.5    | 1.036511267 | 0.6927   | -1.034 |
| 101945_g_at | 107.6  | 168.7  | 138.3  | 129.9  | 112.9  | 145.6  | 92.6   | 83.7   | 0.192516441 | 136.125  | 108.7    | 27.425  | 1.252299908 | 0.1757   | -1.265 |
| 101946_at   | 533.3  | 576.2  | 564    | 617.2  | 377.3  | 645.4  | 343.7  | 458.9  | 0.182964715 | 572.675  | 456.325  | 116.35  | 1.254971785 | 0.1226   | -1.292 |



|             |        |        |        |        |        |        |        |        |             |          |          |         |             |          |        |
|-------------|--------|--------|--------|--------|--------|--------|--------|--------|-------------|----------|----------|---------|-------------|----------|--------|
| 101947_at   | 314.2  | 461.6  | 306.9  | 513.6  | 466.6  | 466.5  | 477.5  | 684.9  | 0.146903254 | 399.075  | 523.875  | 124.8   | 0.761775233 | 0.1301   | 1.328  |
| 101948_at   | 1157.2 | 1031.6 | 1240.5 | 1345.2 | 1080.4 | 1218.8 | 1539.4 | 1297.7 | 0.47187821  | 1193.625 | 1284.075 | 90.45   | 0.929560189 | 0.482    | -1.072 |
| 101949_at   | 186.4  | 190.3  | 185.6  | 206.6  | 106.8  | 249    | 215    | 253.4  | 0.714679709 | 192.225  | 206.05   | 13.825  | 0.932904635 | 0.9416   | -1.016 |
| 101950_at   | 33.5   | 21.9   | 11.6   | 29.1   | 42.9   | 3.3    | 18.5   | 23.2   | 0.837328347 | 24.025   | 21.975   | 2.05    | 1.093287827 | 0.5789   | -1.418 |
| 101952_at   | 112.5  | 108.7  | 34.4   | 91.6   | 120.2  | 123.3  | 109.9  | 79.1   | 0.352423246 | 86.8     | 108.125  | 21.325  | 0.802774566 | 0.35     | 1.353  |
| 101953_at   | 3.2    | 4.4    | 3.5    | 2.6    | 23.5   | 5.3    | 8.9    | 4.5    | 0.205409169 | 3.425    | 10.55    | 7.125   | 0.32464455  | 0.05663  | 2.497  |
| 101954_at   | 6161.8 | 5607.8 | 6072.7 | 5553.9 | 7174.5 | 4418.4 | 5000.2 | 4640.4 | 0.462019523 | 5849.05  | 5308.375 | 540.675 | 1.101853204 | 0.3476   | -1.122 |
| 101955_at   | 5995.5 | 5047.9 | 5430.3 | 5880.9 | 6673.2 | 5730.1 | 6781.9 | 5653   | 0.149907379 | 5588.65  | 6209.55  | 620.9   | 0.900008857 | 0.1467   | -1.11  |
| 101956_at   | 301.3  | 470.9  | 302.5  | 381.4  | 380    | 425.9  | 436.6  | 487.3  | 0.200390122 | 364.025  | 432.45   | 68.425  | 0.841773615 | 0.1676   | 1.204  |
| 101957_f_at | 316.1  | 713.8  | 543.4  | 515.1  | 673.7  | 539.8  | 768.5  | 656    | 0.206260039 | 522.1    | 659.5    | 137.4   | 0.791660349 | 0.1988   | 1.305  |
| 101958_f_at | 1293.2 | 1372   | 1146.7 | 1202.9 | 1181.7 | 1062.8 | 1011.5 | 1070   | 0.033997773 | 1253.7   | 1081.5   | 172.2   | 1.159223301 | 0.02837  | -1.158 |
| 101959_r_at | 2946.7 | 3208.3 | 2752.8 | 3059.7 | 2145.4 | 2811.1 | 2125.2 | 2434.7 | 0.022639923 | 2991.875 | 2379.1   | 612.775 | 1.257565886 | 0.01855  | -1.264 |
| 101960_at   | 1633.6 | 1273.9 | 1489   | 1428.1 | 1184.7 | 1513   | 1375.6 | 1245.7 | 0.270822492 | 1456.15  | 1329.75  | 126.4   | 1.095055462 | 0.2685   | -1.096 |
| 101961_at   | 3832.3 | 3211.3 | 3741   | 3281   | 3295.9 | 3051   | 3254.9 | 2929.4 | 0.090283519 | 3516.4   | 3132.8   | 383.6   | 1.122446374 | 0.07479  | -1.12  |
| 101962_at   | 2652.4 | 3015.6 | 3160.2 | 2854.3 | 2399.1 | 3280.6 | 3510   | 3023.6 | 0.639599344 | 2920.625 | 3053.325 | 132.7   | 0.956539183 | 0.7016   | -1.037 |
| 101963_at   | 8577.6 | 8336.3 | 8710.6 | 8083.1 | 8740.7 | 7605.5 | 8332.9 | 7247.9 | 0.291388112 | 8426.9   | 7981.75  | 445.15  | 1.055770978 | 0.2608   | -1.058 |
| 101964_at   | 2828.8 | 3387.6 | 3124.8 | 2665.7 | 3802.4 | 3372.3 | 3530.4 | 3270.1 | 0.050925702 | 3001.725 | 3493.8   | 492.075 | 0.859157651 | 0.04806  | 1.167  |
| 101965_at   | 1012.8 | 797.6  | 503.2  | 570.6  | 665.7  | 741.5  | 550.2  | 501.6  | 0.450338276 | 721.05   | 614.75   | 106.3   | 1.172915819 | 0.4927   | -1.142 |
| 101966_s_at | 726.4  | 565.2  | 752.1  | 632.9  | 553.9  | 662.4  | 594.2  | 504.1  | 0.151196112 | 669.15   | 578.65   | 90.5    | 1.156398514 | 0.1506   | -1.155 |
| 101967_at   | 216.4  | 133    | 149.6  | 224.7  | 180.7  | 176.4  | 178.3  | 243.3  | 0.646306517 | 180.925  | 194.675  | 13.75   | 0.929369462 | 0.5793   | -1.094 |
| 101968_at   | 137.6  | 122.3  | 141.7  | 136    | 207    | 125.7  | 170.9  | 182.8  | 0.114456242 | 134.4    | 171.6    | 37.2    | 0.783216783 | 0.08361  | 1.258  |
| 101969_at   | 255.4  | 584.8  | 469.3  | 392.3  | 267.2  | 460.5  | 322.3  | 446.1  | 0.564424639 | 425.45   | 374.025  | 51.425  | 1.137490809 | 0.6328   | -1.117 |
| 101970_at   | 10.3   | 90.3   | 14.4   | 11.8   | 16.7   | 70.4   | 44.1   | 12.7   | 0.863644354 | 31.7     | 35.975   | 4.275   | 0.881167477 | 0.6027   | 1.428  |
| 101971_at   | 5216.7 | 3926.8 | 4818.7 | 4885.7 | 3471.6 | 3634.3 | 3580.1 | 4239.3 | 0.02934295  | 4711.975 | 3731.325 | 980.65  | 1.262815488 | 0.02274  | -1.26  |
| 101972_at   | 14.8   | 10.5   | 9.3    | 8.6    | 9.5    | 12     | 11.7   | 9      | 0.881221574 | 10.8     | 10.55    | 0.25    | 1.023696682 | 0.9602   | -1.007 |
| 101973_at   | 1729.8 | 2504.5 | 2233.3 | 2276.8 | 1166.4 | 1725.6 | 1366.2 | 1311.6 | 0.009233112 | 2186.1   | 1392.45  | 793.65  | 1.569966606 | 0.007388 | -1.572 |
| 101975_at   | 4596.3 | 8652.3 | 6075.3 | 6886   | 7080.5 | 7460.4 | 7591.1 | 9478.5 | 0.234467889 | 6552.475 | 7902.625 | 1350.15 | 0.829151706 | 0.2091   | 1.229  |
| 101976_at   | 1702.2 | 1190.1 | 1073.4 | 1325   | 1231.7 | 1324.9 | 1311.9 | 1246.4 | 0.770763062 | 1322.675 | 1278.725 | 43.95   | 1.034370173 | 0.8549   | -1.019 |
| 101977_at   | 1045.7 | 1828.4 | 1221   | 1453.8 | 1133.1 | 1325.5 | 1474.2 | 1079.6 | 0.518417178 | 1387.225 | 1253.1   | 134.125 | 1.107034554 | 0.5537   | -1.092 |
| 101978_at   | 345.9  | 249.3  | 316.5  | 343.6  | 305.6  | 228.2  | 349.9  | 360.5  | 0.943698839 | 313.825  | 311.05   | 2.775   | 1.008921395 | 0.9061   | -1.016 |
| 101979_at   | 174.8  | 218.1  | 193    | 136.4  | 174.5  | 166.5  | 175.3  | 207.2  | 0.988322903 | 180.575  | 180.875  | 0.3     | 0.998341396 | 0.9126   | -1.013 |
| 101980_at   | 198.8  | 154.2  | 190.2  | 193.1  | 153    | 179.4  | 180.5  | 215.4  | 0.906639841 | 184.075  | 182.075  | 2       | 1.010984484 | 0.8874   | -1.014 |
| 101981_at   | 391.2  | 349.9  | 297.2  | 435.6  | 333.7  | 348.3  | 283.3  | 258.3  | 0.140469365 | 368.475  | 305.9    | 62.575  | 1.204560314 | 0.1387   | -1.202 |
| 101982_at   | 703.6  | 1126.5 | 996.9  | 916.7  | 580.6  | 962.9  | 683.9  | 870.7  | 0.241285945 | 935.925  | 774.525  | 161.4   | 1.208385785 | 0.2484   | -1.215 |
| 101984_at   | 3444.6 | 3090.1 | 3187.8 | 2546.3 | 5234.4 | 3195.2 | 4069.3 | 3111.8 | 0.191842163 | 3067.2   | 3902.675 | 835.475 | 0.785922476 | 0.154    | 1.251  |
| 101985_at   | 22.5   | 13.3   | 36.4   | 27.9   | 4.9    | 34     | 9.1    | 26.3   | 0.477220444 | 25.025   | 18.575   | 6.45    | 1.347240915 | 0.3485   | -1.664 |
| 101989_at   | 1612.2 | 2771.6 | 1813.1 | 1839.6 | 3075.4 | 1993.8 | 2701.2 | 2223.5 | 0.217207416 | 2009.125 | 2498.475 | 489.35  | 0.804140526 | 0.1901   | 1.254  |
| 101990_at   | 2070   | 2018.3 | 1954.5 | 2715.7 | 2181.5 | 2587.1 | 3272.9 | 3204.1 | 0.102254394 | 2189.625 | 2811.4   | 621.775 | 0.778837946 | 0.09162  | 1.278  |
| 101991_at   | 267.1  | 204    | 203.3  | 269    | 209.5  | 246.2  | 228.1  | 274.2  | 0.880289936 | 235.85   | 239.5    | 3.65    | 0.984759916 | 0.8452   | -1.02  |
| 101992_at   | 4758.5 | 4332.2 | 3868.9 | 3454.2 | 4762.3 | 3870.3 | 3786.8 | 4391.9 | 0.794397893 | 4103.45  | 4202.825 | 99.375  | 0.97635519  | 0.772    | -1.027 |
| 101993_at   | 63.8   | 115.7  | 66.5   | 90.6   | 102.8  | 156.2  | 87.8   | 160.5  | 0.109333553 | 84.15    | 126.825  | 42.675  | 0.663512714 | 0.09555  | 1.502  |
| 101995_at   | 2425.1 | 2726.8 | 2904.5 | 2638.6 | 3266.6 | 2566.6 | 3004.3 | 2440.5 | 0.533170945 | 2673.75  | 2819.5   | 145.75  | 0.948306437 | 0.5564   | -1.049 |
| 101996_at   | 552.1  | 432    | 433.9  | 412.1  | 422.9  | 474.9  | 421    | 420.1  | 0.54580069  | 457.525  | 434.725  | 22.8    | 1.052446949 | 0.5511   | -1.047 |
| 101997_at   | 874.5  | 816.6  | 828.5  | 578.3  | 726.5  | 720.7  | 701.6  | 674    | 0.379928925 | 774.475  | 705.7    | 68.775  | 1.097456426 | 0.4306   | -1.084 |
| 101998_at   | 625.4  | 561    | 562.8  | 831.2  | 659.2  | 726.2  | 672.7  | 813.4  | 0.366406056 | 645.1    | 717.875  | 72.775  | 0.898624412 | 0.304    | 1.124  |
| 102000_f_at | 2537.3 | 2239.7 | 2564   | 2217.1 | 3545.7 | 2218.6 | 2666.4 | 2200.1 | 0.465936087 | 2389.525 | 2657.7   | 268.175 | 0.899095082 | 0.48     | -1.093 |
| 102001_at   | 952.8  | 806    | 755    | 760.2  | 648.2  | 716.2  | 623.4  | 794.3  | 0.088040708 | 818.5    | 695.525  | 122.975 | 1.176808885 | 0.07809  | -1.177 |
| 102002_at   | 225.3  | 376.1  | 265.8  | 339.3  | 297    | 259.6  | 235.8  | 236.9  | 0.298377972 | 301.625  | 257.325  | 44.3    | 1.172155834 | 0.3061   | -1.154 |
| 102003_at   | 477.6  | 486.6  | 539.4  | 444.8  | 388.2  | 449.9  | 359.3  | 589.9  | 0.505399428 | 487.1    | 446.825  | 40.275  | 1.090135959 | 0.412    | -1.108 |
| 102004_at   | 266.3  | 233    | 199.4  | 269.5  | 324.7  | 343.5  | 300.8  | 203.7  | 0.211119686 | 242.05   | 293.175  | 51.125  | 0.8256161   | 0.2395   | 1.196  |
| 102007_at   | 112.3  | 82     | 116.9  | 109.3  | 89.1   | 111.3  | 96.3   | 91.1   | 0.420286225 | 105.125  | 96.95    | 8.175   | 1.084321815 | 0.458    | -1.078 |
| 102009_at   | 81.5   | 96.4   | 96.8   | 96.1   | 133.6  | 128.8  | 139.6  | 159.3  | 0.001971666 | 92.7     | 140.325  | 47.625  | 0.6606093   | 0.000578 | 1.513  |
| 102010_at   | 17.2   | 20.3   | 33.9   | 21.6   | 18.7   | 19.5   | 26.5   | 21     | 0.675299686 | 23.25    | 21.425   | 1.825   | 1.085180863 | 0.7352   | -1.06  |
| 102011_at   | 255.5  | 183.9  | 216.3  | 210.7  | 213    | 229.4  | 216.6  | 152.9  | 0.568491718 | 216.6    | 202.975  | 13.625  | 1.067126493 | 0.5606   | -1.073 |
| 102012_at   | 962.9  | 714.4  | 840.1  | 866    | 652.5  | 1219   | 933.3  | 954.8  | 0.497431826 | 845.85   | 939.9    | 94.05   | 0.899936163 | 0.5647   | -1.091 |
| 102013_at   | 6      | 4.7    | 4.2    | 4.1    | 6      | 3.7    | 11.7   | 12.3   | 0.180968592 | 4.75     | 8.425    | 3.675   | 0.56379822  | 0.1719   | 1.595  |



|             |        |        |        |        |        |        |        |        |             |          |          |        |             |          |        |
|-------------|--------|--------|--------|--------|--------|--------|--------|--------|-------------|----------|----------|--------|-------------|----------|--------|
| 102014_at   | 169.5  | 300.3  | 241.4  | 298.1  | 389.7  | 271.4  | 352.5  | 305.1  | 0.104784926 | 252.325  | 329.675  | 77.35  | 0.765374991 | 0.1192   | 1.327  |
| 102015_at   | 64.4   | 132.9  | 121.4  | 108.3  | 185.6  | 131.5  | 140.1  | 102.1  | 0.199405573 | 106.75   | 139.825  | 33.075 | 0.763454318 | 0.2127   | 1.327  |
| 102016_at   | 2.6    | 6.4    | 2.4    | 2      | 3.2    | 2.8    | 3.1    | 3.7    | 0.89405273  | 3.35     | 3.2      | 0.15   | 1.046875    | 0.8688   | -1.047 |
| 102017_at   | 288.5  | 350.4  | 300.4  | 328.7  | 257.4  | 400.8  | 353    | 299.4  | 0.770753186 | 317      | 327.65   | 10.65  | 0.967495803 | 0.8415   | -1.022 |
| 102018_at   | 198.9  | 326    | 274.8  | 246.8  | 223    | 261    | 237.1  | 291.9  | 0.795510749 | 261.625  | 253.25   | 8.375  | 1.033070089 | 0.8592   | -1.022 |
| 102019_at   | 1779.6 | 1548.4 | 1521.2 | 1322.1 | 1874   | 1423.8 | 1457.2 | 1152   | 0.722603576 | 1542.825 | 1476.75  | 66.075 | 1.044743525 | 0.6642   | -1.055 |
| 102020_at   | 48.2   | 56.8   | 97.3   | 60.7   | 18.3   | 107.1  | 106.9  | 80.7   | 0.620865294 | 65.75    | 78.25    | 12.5   | 0.840255591 | 0.9817   | -1.011 |
| 102021_at   | 136.6  | 171.2  | 122.2  | 131.2  | 157.1  | 175    | 134.1  | 179.1  | 0.206275058 | 140.3    | 161.325  | 21.025 | 0.86967302  | 0.2      | 1.152  |
| 102022_at   | 563.1  | 385.7  | 475.6  | 440.6  | 804    | 402    | 524    | 518.9  | 0.359664725 | 466.25   | 562.225  | 95.975 | 0.829294322 | 0.3543   | 1.179  |
| 102024_at   | 126.4  | 92.5   | 133.2  | 180.2  | 129.7  | 106.3  | 125.1  | 168.9  | 0.980371367 | 133.075  | 132.5    | 0.575  | 1.004339623 | 0.9561   | -1.01  |
| 102025_at   | 30.3   | 24.3   | 34.1   | 17.4   | 6.4    | 26.2   | 8      | 13.6   | 0.067979497 | 26.525   | 13.55    | 12.975 | 1.957564576 | 0.06184  | -2.218 |
| 102026_s_at | 97.4   | 127.5  | 119.6  | 138.1  | 167.6  | 128.7  | 163.1  | 169    | 0.030203781 | 120.65   | 157.1    | 36.45  | 0.767982177 | 0.03626  | 1.305  |
| 102027_s_at | 573.2  | 1042.3 | 847.4  | 797.7  | 987.4  | 1037.3 | 1019.7 | 1002   | 0.133690608 | 815.15   | 1011.6   | 196.45 | 0.805802689 | 0.1043   | 1.269  |
| 102028_at   | 654.1  | 613.4  | 543.4  | 519.6  | 502.3  | 574.4  | 482.1  | 640.4  | 0.516999575 | 582.625  | 549.8    | 32.825 | 1.059703529 | 0.5008   | -1.062 |
| 102029_at   | 100.7  | 74     | 61.9   | 83.4   | 109.5  | 91.4   | 74.3   | 99.2   | 0.264867495 | 80       | 93.6     | 13.6   | 0.854700855 | 0.2618   | 1.177  |
| 102030_at   | 109.1  | 64.2   | 95.6   | 127.8  | 78.8   | 117.1  | 57     | 112.3  | 0.70130803  | 99.175   | 91.3     | 7.875  | 1.086254107 | 0.6946   | -1.097 |
| 102031_at   | 83.3   | 87.9   | 87.3   | 80.3   | 96.9   | 104.1  | 108.7  | 107.1  | 0.001328972 | 84.7     | 104.2    | 19.5   | 0.812859885 | 0.000794 | 1.23   |
| 102032_at   | 1271.8 | 1120.8 | 1255.1 | 1159.6 | 1179.4 | 1169.1 | 1388.1 | 1225   | 0.562201093 | 1201.825 | 1240.4   | 38.575 | 0.968901161 | 0.5639   | -1.031 |
| 102033_at   | 244.8  | 503.2  | 336.4  | 423.3  | 331.8  | 374.5  | 391.9  | 338.2  | 0.774647949 | 376.925  | 359.1    | 17.825 | 1.049637984 | 0.9251   | -1.016 |
| 102035_at   | 420    | 247.1  | 323.7  | 307    | 335.3  | 307.6  | 292.7  | 240.1  | 0.492511523 | 324.45   | 293.925  | 30.525 | 1.103853024 | 0.5227   | -1.092 |
| 102036_at   | 190.6  | 218.2  | 243.8  | 209.4  | 189.8  | 203.1  | 177.1  | 177.4  | 0.076352388 | 215.5    | 186.85   | 28.65  | 1.153331549 | 0.05936  | -1.151 |
| 102037_at   | 137.4  | 175.3  | 143.4  | 134.5  | 129.5  | 195.9  | 194.8  | 156    | 0.305112549 | 147.65   | 169.05   | 21.4   | 0.873410234 | 0.3188   | 1.135  |
| 102038_at   | 38.6   | 51.4   | 41.6   | 59.9   | 56.3   | 51.2   | 59     | 59.4   | 0.175920916 | 47.875   | 56.475   | 8.6    | 0.84772023  | 0.143    | 1.196  |
| 102039_at   | 859.4  | 895.3  | 958.2  | 832.5  | 766.6  | 833.7  | 788.5  | 943.8  | 0.314347184 | 886.35   | 833.15   | 53.2   | 1.063854048 | 0.2919   | -1.066 |
| 102040_at   | 462.8  | 533.1  | 682.2  | 526.4  | 624.9  | 627.4  | 624.8  | 652.6  | 0.178129793 | 551.125  | 632.425  | 81.3   | 0.871447207 | 0.1211   | 1.159  |
| 102041_at   | 7.1    | 10     | 25.7   | 6.6    | 11.4   | 10.2   | 8.6    | 58.6   | 0.491451818 | 12.35    | 22.2     | 9.85   | 0.556306306 | 0.4946   | 1.486  |
| 102042_at   | 279.7  | 288.1  | 255.8  | 321.6  | 308.1  | 310.8  | 294.2  | 371.6  | 0.16549596  | 286.3    | 321.175  | 34.875 | 0.891414338 | 0.153    | 1.121  |
| 102043_at   | 348    | 318    | 342.9  | 334.3  | 283.7  | 392.5  | 392    | 322    | 0.697738992 | 335.8    | 347.55   | 11.75  | 0.966191915 | 0.7644   | -1.026 |
| 102044_at   | 1908.1 | 1569.8 | 1560.5 | 1629.8 | 1282.4 | 1634.9 | 1336.4 | 1457.9 | 0.079048322 | 1667.05  | 1427.9   | 239.15 | 1.167483717 | 0.07206  | -1.169 |
| 102046_at   | 235.4  | 198.8  | 301.2  | 336.8  | 236.6  | 259.3  | 210    | 241.3  | 0.40008273  | 268.05   | 236.8    | 31.25  | 1.131967905 | 0.4359   | -1.112 |
| 102047_at   | 1305.2 | 1125.1 | 1165   | 1256.7 | 1218.2 | 981.9  | 1039.8 | 1166.5 | 0.159016706 | 1213     | 1101.6   | 111.4  | 1.101125635 | 0.1547   | -1.103 |
| 102048_at   | 8.1    | 6      | 1.6    | 4.1    | 6.4    | 2.9    | 16     | 12.4   | 0.236431571 | 4.95     | 9.425    | 4.475  | 0.525198939 | 0.2891   | 1.834  |
| 102049_at   | 127.1  | 144    | 177.3  | 105    | 81.2   | 118.5  | 102.5  | 153.1  | 0.297387754 | 138.35   | 113.825  | 24.525 | 1.215462333 | 0.2825   | -1.226 |
| 102050_at   | 22.2   | 7.6    | 9.2    | 9.9    | 14.4   | 13.1   | 8.6    | 6.9    | 0.715665294 | 12.225   | 10.75    | 1.475  | 1.137209302 | 0.8075   | -1.078 |
| 102052_at   | 448.6  | 371.9  | 418.7  | 357.3  | 352.7  | 403.2  | 323.1  | 358.2  | 0.190208683 | 399.125  | 359.3    | 39.825 | 1.110840523 | 0.1851   | -1.11  |
| 102053_at   | 47.5   | 60.3   | 41.6   | 53.1   | 32.4   | 45.7   | 37.8   | 42.9   | 0.073433506 | 50.625   | 39.7     | 10.925 | 1.275188917 | 0.06904  | -1.275 |
| 102054_at   | 1072.3 | 800.8  | 959.3  | 569.1  | 574.8  | 918.5  | 1059.8 | 593.7  | 0.708804935 | 850.375  | 786.7    | 63.675 | 1.080939367 | 0.6923   | -1.09  |
| 102056_f_at | 930.3  | 1045.6 | 768.2  | 911.8  | 946.4  | 879    | 964.9  | 977.4  | 0.671213444 | 913.975  | 941.925  | 27.95  | 0.970326725 | 0.6221   | -1.036 |
| 102057_r_at | 18.6   | 106.4  | 28.7   | 83.4   | 142.9  | 71.4   | 90.1   | 72.7   | 0.245252953 | 59.275   | 94.275   | 35     | 0.628745691 | 0.1907   | 1.936  |
| 102058_at   | 459.7  | 404.7  | 460.5  | 433.9  | 348.1  | 476.7  | 290    | 449.8  | 0.353948586 | 439.7    | 391.15   | 48.55  | 1.124121181 | 0.3011   | -1.145 |
| 102059_at   | 428.8  | 383.8  | 486.7  | 428.3  | 441.1  | 462.4  | 497.4  | 381.4  | 0.686212767 | 431.9    | 445.575  | 13.675 | 0.969309319 | 0.6985   | -1.031 |
| 102060_at   | 707.9  | 648    | 828.7  | 708.2  | 553.7  | 873.3  | 610.9  | 854.4  | 0.998961032 | 723.2    | 723.075  | 0.125  | 1.000172873 | 0.9027   | -1.016 |
| 102061_at   | 436.9  | 441.1  | 495.6  | 392.2  | 459.6  | 442.5  | 492.4  | 492.2  | 0.274495604 | 441.45   | 471.675  | 30.225 | 0.93591986  | 0.2558   | -1.071 |
| 102062_at   | 637.5  | 1405.8 | 939.8  | 1158.4 | 1411.9 | 908.4  | 1013.3 | 1044.7 | 0.774983581 | 1035.375 | 1094.575 | 59.2   | 0.945915081 | 0.6849   | -1.086 |
| 102063_at   | 112.6  | 109.6  | 98.1   | 133.1  | 133.9  | 134.1  | 124.4  | 191.6  | 0.122579795 | 113.35   | 146      | 32.65  | 0.776369863 | 0.07953  | 1.277  |
| 102064_at   | 15.9   | 30.5   | 10.2   | 42.9   | 37.8   | 36.7   | 45.7   | 34.9   | 0.154790875 | 24.875   | 38.775   | 13.9   | 0.641521599 | 0.1231   | 1.797  |
| 102065_at   | 84.4   | 76.8   | 71.5   | 51.8   | 66.6   | 33.1   | 15.2   | 52.9   | 0.078709257 | 71.125   | 41.95    | 29.175 | 1.695470799 | 0.1062   | -1.918 |
| 102069_at   | 719.5  | 654.7  | 684.9  | 884.1  | 590.5  | 658.3  | 571.7  | 1095.7 | 0.962183533 | 735.8    | 729.05   | 6.75   | 1.009258624 | 0.8186   | -1.04  |
| 102070_at   | 218    | 276.4  | 292.4  | 290    | 320.3  | 323.3  | 389.1  | 303.7  | 0.044950388 | 269.2    | 334.1    | 64.9   | 0.805746782 | 0.04731  | 1.244  |
| 102071_at   | 592.7  | 766.6  | 759.7  | 710.7  | 773.8  | 683.2  | 705.6  | 762.7  | 0.625740546 | 707.425  | 731.325  | 23.9   | 0.967319591 | 0.6      | -1.038 |
| 102072_g_at | 611.6  | 763.3  | 706.1  | 698.9  | 802.2  | 694.8  | 727.8  | 806.6  | 0.184065807 | 694.975  | 757.85   | 62.875 | 0.917035033 | 0.1872   | -1.092 |
| 102073_at   | 22.9   | 8.6    | 18     | 7.7    | 7.8    | 28.4   | 13.6   | 6.6    | 0.975482894 | 14.3     | 14.1     | 0.2    | 1.014184397 | 0.8632   | -1.079 |
| 102074_at   | 57.3   | 70.1   | 84.3   | 79.6   | 53.3   | 79.7   | 104.6  | 87.2   | 0.525213492 | 72.825   | 81.2     | 8.375  | 0.896859606 | 0.6057   | -1.095 |
| 102075_at   | 3.4    | 5.3    | 3.3    | 14.1   | 6      | 2.3    | 5.6    | 5.6    | 0.577995675 | 6.525    | 4.875    | 1.65   | 1.338461538 | 0.696    | -1.181 |
| 102076_at   | 64     | 17.7   | 34.9   | 88.3   | 94.9   | 90.7   | 94.7   | 107.8  | 0.057270397 | 51.225   | 97.025   | 45.8   | 0.527956712 | 0.06444  | 2.24   |
| 102077_at   | 50.3   | 10.4   | 21.7   | 6.3    | 15.3   | 64.6   | 54.9   | 51.9   | 0.146300525 | 22.175   | 46.675   | 24.5   | 0.475093733 | 0.1529   | 2.507  |



|             |         |         |         |         |         |         |         |         |             |           |           |          |             |         |        |
|-------------|---------|---------|---------|---------|---------|---------|---------|---------|-------------|-----------|-----------|----------|-------------|---------|--------|
| 102078_at   | 15.7    | 7.9     | 2.9     | 5       | 26      | 5       | 14.3    | 10.9    | 0.290547569 | 7.875     | 14.05     | 6.175    | 0.560498221 | 0.2668  | 1.834  |
| 102079_at   | 11.3    | 7.3     | 12.4    | 26.5    | 5.1     | 14.4    | 30.6    | 13.1    | 0.841095119 | 14.375    | 15.8      | 1.425    | 0.909810127 | 0.9672  | -1.02  |
| 102080_at   | 91.3    | 102.6   | 53.6    | 80.9    | 20.5    | 38      | 111.5   | 108.6   | 0.654157331 | 82.1      | 69.65     | 12.45    | 1.178750897 | 0.4372  | -1.441 |
| 102081_at   | 31.6    | 54.1    | 65.9    | 54.2    | 63.5    | 57.5    | 65.3    | 70.2    | 0.176308594 | 51.45     | 64.125    | 12.675   | 0.802339181 | 0.1729  | 1.287  |
| 102082_at   | 9.8     | 14.8    | 7.4     | 6.9     | 6.5     | 17.6    | 5.9     | 10      | 0.935501919 | 9.725     | 10        | 0.275    | 0.9725      | 0.9393  | -1.024 |
| 102083_at   | 66.9    | 76      | 94.2    | 109.9   | 45.2    | 71.6    | 88.1    | 114.6   | 0.708945303 | 86.75     | 79.875    | 6.875    | 1.086071987 | 0.6161  | -1.127 |
| 102084_f_at | 47.8    | 109.1   | 167     | 72.9    | 121.7   | 72      | 40.8    | 125.6   | 0.790627288 | 99.2      | 90.025    | 9.175    | 1.101916134 | 0.8257  | -1.091 |
| 102085_at   | 16.9    | 11.6    | 11.4    | 37.8    | 7.2     | 7.4     | 8.3     | 12.1    | 0.186099753 | 19.425    | 8.75      | 10.675   | 2.22        | 0.06299 | -2.002 |
| 102086_r_at | 2       | 2.2     | 9.5     | 8.3     | 5.6     | 2.2     | 0.7     | 12.2    | 0.923388941 | 5.5       | 5.175     | 0.325    | 1.062801932 | 0.7216  | -1.315 |
| 102087_at   | 57.5    | 67.6    | 54.7    | 59      | 44.6    | 57.1    | 99.6    | 16.9    | 0.786004201 | 59.7      | 54.55     | 5.15     | 1.094408799 | 0.4987  | -1.309 |
| 102088_at   | 53.1    | 42.1    | 11.3    | 46.9    | 14.6    | 35.7    | 4.9     | 64      | 0.615417349 | 38.35     | 29.8      | 8.55     | 1.286912752 | 0.4842  | -1.642 |
| 102089_at   | 28.1    | 3.8     | 39.6    | 32.9    | 8.3     | 6.2     | 5       | 6.3     | 0.085655237 | 26.1      | 6.45      | 19.65    | 4.046511628 | 0.09263 | -3.041 |
| 102090_f_at | 170.8   | 174.7   | 145.4   | 175     | 261.8   | 186.4   | 246.5   | 195.4   | 0.05024952  | 166.475   | 222.525   | 56.05    | 0.748118189 | 0.0249  | 1.326  |
| 102091_f_at | 45      | 51.8    | 68.8    | 68.9    | 86.4    | 74.5    | 70.6    | 103.1   | 0.039963204 | 58.625    | 83.65     | 25.025   | 0.70083682  | 0.03753 | 1.435  |
| 102092_s_at | 22.2    | 11.2    | 44.1    | 6.3     | 32.1    | 8.5     | 19.1    | 14.1    | 0.808931209 | 20.95     | 18.45     | 2.5      | 1.135501355 | 0.9798  | -1.013 |
| 102093_f_at | 233.3   | 355.2   | 201.3   | 238.1   | 298.9   | 277.9   | 393.9   | 241.9   | 0.362180248 | 256.975   | 303.15    | 46.175   | 0.847682665 | 0.3198  | 1.188  |
| 102094_f_at | 7097.7  | 7923.1  | 7634.9  | 9026.2  | 7482    | 7303.5  | 7579.6  | 8402.3  | 0.650138333 | 7920.475  | 7691.85   | 228.625  | 1.029723019 | 0.6647  | -1.027 |
| 102095_f_at | 112.9   | 129     | 140.4   | 111.5   | 145.7   | 82      | 130     | 102.4   | 0.61952183  | 123.45    | 115.025   | 8.425    | 1.073244947 | 0.5419  | -1.094 |
| 102096_f_at | 18      | 18.2    | 10.6    | 7.5     | 9.5     | 7.9     | 15.6    | 9.5     | 0.395753588 | 13.575    | 10.625    | 2.95     | 1.277647059 | 0.4395  | -1.24  |
| 102097_f_at | 226.1   | 170.9   | 197.7   | 198     | 266.8   | 166.8   | 231.5   | 237.1   | 0.30798504  | 198.175   | 225.55    | 27.375   | 0.878630016 | 0.3411  | -1.127 |
| 102098_at   | 14825.3 | 14227.6 | 12530.1 | 13416.1 | 17508.4 | 11409.5 | 13873.2 | 14830.5 | 0.654434591 | 13749.775 | 14405.4   | 655.625  | 0.954487553 | 0.7135  | -1.038 |
| 102099_f_at | 215.2   | 438.5   | 334.9   | 391.4   | 481.2   | 398.5   | 415.4   | 393.9   | 0.212834041 | 345       | 422.25    | 77.25    | 0.81705151  | 0.2029  | 1.262  |
| 102100_f_at | 373.8   | 337.2   | 324.7   | 287.7   | 242.8   | 301.3   | 303.1   | 297.2   | 0.100646476 | 330.85    | 286.1     | 44.75    | 1.156413841 | 0.105   | -1.156 |
| 102101_f_at | 77.9    | 121     | 103.9   | 154.3   | 112.9   | 133.6   | 111     | 104.7   | 0.944550063 | 114.275   | 115.55    | 1.275    | 0.988965816 | 0.8162  | -1.038 |
| 102102_at   | 52.5    | 52.7    | 67.5    | 96.2    | 60.6    | 72.4    | 54.8    | 66.7    | 0.759785774 | 67.225    | 63.625    | 3.6      | 1.056581532 | 0.8619  | -1.029 |
| 102103_f_at | 6847    | 6388.4  | 6072.3  | 6555.6  | 9807.4  | 5991.3  | 7719.5  | 6790.2  | 0.271112623 | 6465.825  | 7577.1    | 1111.275 | 0.853337689 | 0.2356  | 1.153  |
| 102104_f_at | 68.7    | 54.6    | 57.5    | 46.7    | 79.1    | 57.8    | 90.5    | 61.6    | 0.146079432 | 56.875    | 72.25     | 15.375   | 0.787197232 | 0.1285  | 1.261  |
| 102105_f_at | 2344.1  | 2558.6  | 3523.6  | 1664.4  | 5359.1  | 1739.7  | 2698.3  | 3072.7  | 0.459427426 | 2522.675  | 3217.45   | 694.775  | 0.784060358 | 0.5061  | 1.218  |
| 102106_at   | 81      | 59.3    | 20.9    | 95.9    | 86.5    | 81.6    | 75.2    | 71.8    | 0.442795329 | 64.275    | 78.775    | 14.5     | 0.81593145  | 0.3566  | 1.41   |
| 102107_at   | 91.7    | 82.1    | 80.7    | 67.2    | 30.4    | 91.3    | 60.1    | 100.5   | 0.590746813 | 80.425    | 70.575    | 9.85     | 1.139567836 | 0.4566  | -1.249 |
| 102108_f_at | 832.3   | 1783.1  | 811.1   | 1124.8  | 1645.3  | 940.3   | 1205.4  | 780.8   | 0.986725353 | 1137.825  | 1142.95   | 5.125    | 0.995515989 | 0.9431  | -1.018 |
| 102109_at   | 19248.6 | 21393.7 | 20643.3 | 16513.6 | 35879.7 | 16554.5 | 23049.5 | 18717.8 | 0.418627213 | 19449.8   | 23550.375 | 4100.575 | 0.825880692 | 0.4336  | 1.162  |
| 102110_at   | 38.7    | 61.3    | 17.6    | 65.8    | 46.4    | 50.4    | 39.9    | 34.7    | 0.811010833 | 45.85     | 42.85     | 3        | 1.070011669 | 0.9016  | -1.041 |
| 102111_f_at | 99.5    | 109.8   | 134.8   | 123.9   | 122.8   | 130.3   | 108.3   | 144.4   | 0.415665349 | 117       | 126.45    | 9.45     | 0.925266904 | 0.414   | -1.082 |
| 102112_s_at | 352.5   | 314.8   | 391.5   | 384.9   | 402.7   | 238.8   | 279.4   | 331.9   | 0.288184769 | 360.925   | 313.2     | 47.725   | 1.152378672 | 0.2486  | -1.17  |
| 102113_f_at | 381.1   | 452     | 480.9   | 458.4   | 598.8   | 465.7   | 556.5   | 553.5   | 0.031412621 | 443.1     | 543.625   | 100.525  | 0.815083927 | 0.03226 | 1.226  |
| 102114_f_at | 339.2   | 442.8   | 452.1   | 357.7   | 491.5   | 478     | 506.8   | 355.5   | 0.233356505 | 397.95    | 457.95    | 60       | 0.86898133  | 0.2538  | 1.149  |
| 102115_r_at | 107.9   | 101.2   | 161.8   | 170     | 134.6   | 136.3   | 123.8   | 132.7   | 0.863144446 | 135.225   | 131.85    | 3.375    | 1.02559727  | 0.994   | -1.001 |
| 102116_f_at | 42      | 36.8    | 28.8    | 8.9     | 5.4     | 29.5    | 24.8    | 28.9    | 0.479773691 | 29.125    | 22.15     | 6.975    | 1.31489842  | 0.5864  | -1.367 |
| 102117_at   | 483.5   | 505.8   | 416.7   | 416.6   | 588.2   | 433.4   | 491.1   | 571.2   | 0.186054258 | 455.65    | 520.975   | 65.325   | 0.874610106 | 0.1846  | 1.139  |
| 102118_at   | 57.1    | 42.6    | 71      | 112.1   | 72      | 57.3    | 53.4    | 107.3   | 0.929047518 | 70.7      | 72.5      | 1.8      | 0.975172414 | 0.8521  | -1.051 |
| 102119_at   | 48.8    | 23.6    | 34.2    | 15.7    | 18.9    | 29.3    | 13.1    | 8.1     | 0.178868461 | 30.575    | 17.35     | 13.225   | 1.762247839 | 0.1578  | -1.802 |
| 102120_f_at | 302.3   | 375.7   | 243.8   | 449.9   | 224.1   | 462.1   | 343.6   | 282.6   | 0.83415455  | 342.925   | 328.1     | 14.825   | 1.045184395 | 0.8003  | -1.055 |
| 102121_f_at | 3.2     | 4.3     | 5.7     | 4.8     | 4.3     | 6.1     | 8.9     | 8.2     | 0.105102608 | 4.5       | 6.875     | 2.375    | 0.654545455 | 0.09541 | 1.507  |
| 102122_f_at | 72      | 68.8    | 69.3    | 99.2    | 97      | 111.8   | 20.7    | 158.3   | 0.548337975 | 77.325    | 96.95     | 19.625   | 0.79757607  | 0.9828  | -1.01  |
| 102123_at   | 246.6   | 201     | 199.8   | 180.3   | 83.3    | 337.3   | 172.1   | 146.8   | 0.716816864 | 206.925   | 184.875   | 22.05    | 1.119269777 | 0.4642  | -1.259 |
| 102124_f_at | 396.4   | 373.8   | 277.2   | 344.4   | 488     | 356.9   | 408.3   | 281.7   | 0.511237125 | 347.95    | 383.725   | 35.775   | 0.906769171 | 0.557   | -1.091 |
| 102125_f_at | 83.7    | 72.1    | 116     | 79.6    | 74.3    | 91.1    | 63.8    | 88.2    | 0.49485805  | 87.85     | 79.35     | 8.5      | 1.107120353 | 0.4978  | -1.1   |
| 102126_at   | 17768.7 | 19557.4 | 18323   | 16366.5 | 29294.3 | 15854.4 | 20782.5 | 18207.4 | 0.381228028 | 18003.9   | 21034.65  | 3030.75  | 0.85591631  | 0.376   | 1.14   |
| 102127_at   | 46.9    | 11.5    | 69.5    | 74.9    | 47.5    | 10.1    | 30.6    | 13      | 0.192210796 | 50.7      | 25.3      | 25.4     | 2.003952569 | 0.2817  | -1.955 |
| 102128_f_at | 639.5   | 476.9   | 553.2   | 601.7   | 528.2   | 540.7   | 660.4   | 476.8   | 0.766088994 | 567.825   | 551.525   | 16.3     | 1.029554417 | 0.7555  | -1.031 |
| 102129_at   | 21      | 43.7    | 49.2    | 65.1    | 92.7    | 54.7    | 108.9   | 50.7    | 0.116758073 | 44.75     | 76.75     | 32       | 0.583061889 | 0.116   | 1.758  |
| 102130_f_at | 1132.7  | 976.1   | 1139.6  | 986.4   | 1087.1  | 1350.8  | 1095.1  | 1048.9  | 0.33933765  | 1058.7    | 1145.475  | 86.775   | 0.9242454   | 0.3258  | -1.079 |
| 102131_f_at | 598.1   | 416     | 601.1   | 422.3   | 629.5   | 491.5   | 371.8   | 562.6   | 0.954867874 | 509.375   | 513.85    | 4.475    | 0.991291233 | 0.9699  | -1.006 |
| 102132_i_at | 60.5    | 38.5    | 94.3    | 34.7    | 31.5    | 26.5    | 33.1    | 76.2    | 0.429810211 | 57        | 41.825    | 15.175   | 1.362821279 | 0.3655  | -1.38  |
| 102133_at   | 21.9    | 12      | 39      | 33.5    | 35.4    | 30.2    | 35      | 35.6    | 0.307088229 | 26.6      | 34.05     | 7.45     | 0.781204112 | 0.2514  | 1.402  |



|             |        |        |        |        |        |        |        |        |             |          |          |         |             |          |        |
|-------------|--------|--------|--------|--------|--------|--------|--------|--------|-------------|----------|----------|---------|-------------|----------|--------|
| 102134_f_at | 1566.3 | 1152.6 | 1303.8 | 1464.4 | 1126.2 | 1109.3 | 1148.4 | 1231.2 | 0.091859572 | 1371.775 | 1153.775 | 218     | 1.188944985 | 0.05742  | -1.182 |
| 102135_at   | 176.9  | 180.1  | 170.6  | 235.4  | 214.7  | 220.3  | 249.5  | 194    | 0.180493648 | 190.75   | 219.625  | 28.875  | 0.868525896 | 0.1579   | 1.157  |
| 102136_r_at | 40.7   | 51.2   | 58.8   | 72     | 55.2   | 66.4   | 38     | 58.3   | 0.897130794 | 55.675   | 54.475   | 1.2     | 1.022028453 | 0.9072   | -1.021 |
| 102137_f_at | 484.8  | 445.1  | 494.3  | 456.1  | 491.7  | 540.4  | 516.7  | 512.1  | 0.02649168  | 470.075  | 515.225  | 45.15   | 0.912368383 | 0.02637  | -1.096 |
| 102138_at   | 7.9    | 4.7    | 4.6    | 8.9    | 41.9   | 4      | 4.9    | 6.8    | 0.455584807 | 6.525    | 14.4     | 7.875   | 0.453125    | 0.5832   | 1.387  |
| 102139_at   | 2.9    | 5.1    | 4.6    | 5.8    | 7      | 6.9    | 8      | 7      | 0.017068987 | 4.6      | 7.225    | 2.625   | 0.636678201 | 0.0194   | 1.623  |
| 102140_at   | 74.7   | 64     | 45.8   | 72.6   | 33.3   | 84.9   | 72.6   | 65.3   | 0.985218611 | 64.275   | 64.025   | 0.25    | 1.003904725 | 0.8638   | -1.043 |
| 102141_f_at | 478.9  | 375.3  | 405.1  | 436.8  | 434.4  | 430.5  | 463    | 417    | 0.640092305 | 424.025  | 436.225  | 12.2    | 0.972032781 | 0.5966   | -1.032 |
| 102142_r_at | 28.7   | 39     | 46.4   | 44.5   | 68.6   | 53.1   | 56.7   | 41     | 0.076137717 | 39.65    | 54.85    | 15.2    | 0.722880583 | 0.07657  | 1.383  |
| 102143_at   | 292.3  | 206.6  | 234.3  | 303.4  | 333    | 243.2  | 295.6  | 237.9  | 0.593052543 | 259.15   | 277.425  | 18.275  | 0.93412634  | 0.583    | -1.073 |
| 102144_f_at | 174.3  | 277.7  | 145.4  | 293.9  | 193.8  | 177.1  | 199.3  | 169.7  | 0.384134789 | 222.825  | 184.975  | 37.85   | 1.204622246 | 0.4465   | -1.155 |
| 102145_f_at | 10.8   | 69.5   | 38.5   | 44.8   | 93.9   | 85.2   | 79.4   | 48.5   | 0.062777236 | 40.9     | 76.75    | 35.85   | 0.532899023 | 0.1122   | 2.208  |
| 102146_at   | 15.8   | 64     | 63.6   | 58.3   | 48     | 65.8   | 52.4   | 37.9   | 0.965141114 | 50.425   | 51.025   | 0.6     | 0.988241058 | 0.7342   | 1.137  |
| 102147_at   | 64.5   | 13.4   | 34.6   | 24.8   | 42.5   | 43.5   | 33.3   | 22.1   | 0.936014933 | 34.325   | 35.35    | 1.025   | 0.971004243 | 0.6881   | 1.166  |
| 102148_f_at | 131    | 79.7   | 107.1  | 158.1  | 209.4  | 103.6  | 138    | 131.1  | 0.383810578 | 118.975  | 145.525  | 26.55   | 0.817557121 | 0.3723   | 1.221  |
| 102149_f_at | 18.6   | 33.9   | 23.2   | 38.2   | 58.6   | 22.6   | 13.3   | 9.8    | 0.852116081 | 28.475   | 26.075   | 2.4     | 1.092042186 | 0.5183   | -1.34  |
| 102150_f_at | 13.9   | 76.9   | 60.4   | 55.2   | 21.5   | 88.2   | 83     | 39.2   | 0.77379503  | 51.6     | 57.975   | 6.375   | 0.89003881  | 0.7971   | 1.147  |
| 102151_at   | 106.7  | 107.3  | 119.9  | 214.3  | 85.9   | 167    | 195    | 232.7  | 0.446231402 | 137.05   | 170.15   | 33.1    | 0.805465766 | 0.4952   | 1.22   |
| 102152_f_at | 404.1  | 343.2  | 439.8  | 315.9  | 231.9  | 332.9  | 293.4  | 509.4  | 0.632950598 | 375.75   | 341.9    | 33.85   | 1.099005557 | 0.506    | -1.137 |
| 102153_at   | 33     | 37.5   | 23.2   | 5.7    | 44.9   | 22.7   | 16.8   | 21.4   | 0.871028592 | 24.85    | 26.45    | 1.6     | 0.939508507 | 0.69     | 1.223  |
| 102154_f_at | 6.2    | 12     | 12.4   | 13.9   | 61.4   | 11.2   | 13.7   | 21.9   | 0.266500245 | 11.125   | 27.05    | 15.925  | 0.411275416 | 0.1504   | 2.005  |
| 102155_f_at | 9.7    | 22.7   | 11.9   | 6      | 4.4    | 12.9   | 12.4   | 6.5    | 0.437419296 | 12.575   | 9.05     | 3.525   | 1.389502762 | 0.439    | -1.37  |
| 102156_f_at | 91.9   | 61     | 52.8   | 85.4   | 94.9   | 57.2   | 63.1   | 42.4   | 0.585617999 | 72.775   | 64.4     | 8.375   | 1.130046584 | 0.5392   | -1.149 |
| 102157_f_at | 3      | 3.6    | 4      | 2.6    | 8.3    | 3.5    | 9.8    | 3.3    | 0.175683421 | 3.3      | 6.225    | 2.925   | 0.530120482 | 0.1233   | 1.704  |
| 102158_at   | 76.8   | 67.1   | 119    | 84.2   | 65.1   | 68.8   | 64.8   | 90.8   | 0.318235635 | 86.775   | 72.375   | 14.4    | 1.198963731 | 0.2945   | -1.183 |
| 102159_at   | 44.6   | 37.3   | 35.1   | 41.3   | 16.8   | 40.5   | 59.6   | 33     | 0.831413366 | 39.575   | 37.475   | 2.1     | 1.056037358 | 0.6076   | -1.157 |
| 102160_at   | 15.7   | 42.9   | 35     | 35.3   | 46.4   | 45.1   | 39.6   | 40.7   | 0.16069502  | 32.225   | 42.95    | 10.725  | 0.750291036 | 0.1724   | 1.419  |
| 102161_f_at | 359.2  | 354    | 348.5  | 298.3  | 472.2  | 615.7  | 446.9  | 396.7  | 0.050605878 | 340      | 482.875  | 142.875 | 0.704115972 | 0.01597  | 1.405  |
| 102162_at   | 226    | 263.4  | 297.7  | 285.7  | 248.6  | 247.2  | 261.5  | 327.1  | 0.910276529 | 268.2    | 271.1    | 2.9     | 0.98930284  | 0.9194   | -1.01  |
| 102163_at   | 139.7  | 186.6  | 218.6  | 183.6  | 174.1  | 227.4  | 175.7  | 151.3  | 1           | 182.125  | 182.125  | 0       | 1           | 0.99     | -1.002 |
| 102164_at   | 2.6    | 2.6    | 3      | 3.9    | 4.5    | 5.9    | 3      | 4.1    | 0.107902013 | 3.025    | 4.375    | 1.35    | 0.691428571 | 0.08078  | 1.418  |
| 102165_at   | 206.2  | 343.3  | 304    | 445.6  | 396.5  | 362.9  | 321.4  | 401.4  | 0.437523119 | 324.775  | 370.55   | 45.775  | 0.876467413 | 0.3645   | 1.18   |
| 102166_g_at | 42.9   | 53.7   | 63.8   | 43.8   | 39     | 40.6   | 53.8   | 53     | 0.507139952 | 51.05    | 46.6     | 4.45    | 1.095493562 | 0.5093   | -1.093 |
| 102167_at   | 48.9   | 69.2   | 76     | 99.4   | 85.7   | 59.8   | 76.4   | 108.3  | 0.550708342 | 73.375   | 82.55    | 9.175   | 0.888855239 | 0.5338   | 1.135  |
| 102168_at   | 37.2   | 9.1    | 31.6   | 18.5   | 16.2   | 16.3   | 46.1   | 31.8   | 0.727617622 | 24.1     | 27.6     | 3.5     | 0.873188406 | 0.6986   | 1.181  |
| 102169_at   | 87.4   | 16     | 127.4  | 117.6  | 112.3  | 120.6  | 34.1   | 108.8  | 0.83902199  | 87.1     | 93.95    | 6.85    | 0.927088877 | 0.7159   | 1.245  |
| 102170_at   | 176.3  | 126.2  | 182.4  | 141.3  | 208.4  | 163.7  | 173.3  | 150.3  | 0.38179532  | 156.55   | 173.925  | 17.375  | 0.900100618 | 0.3671   | -1.116 |
| 102171_r_at | 145    | 157.4  | 296.6  | 222.4  | 218.7  | 257.3  | 215.1  | 233.6  | 0.520035902 | 205.35   | 231.175  | 25.825  | 0.888288093 | 0.3895   | 1.171  |
| 102192_r_at | 7.8    | 11.7   | 8.8    | 13.8   | 19.1   | 11.8   | 1.4    | 12     | 0.894773775 | 10.525   | 11.075   | 0.55    | 0.9503386   | 0.6658   | -1.316 |
| 102193_at   | 757.7  | 528.4  | 742.2  | 649.6  | 499.9  | 465.1  | 459.9  | 476.2  | 0.03281291  | 669.475  | 475.275  | 194.2   | 1.408605544 | 0.007773 | -1.395 |
| 102194_at   | 698.6  | 627.9  | 839.9  | 665.7  | 854.6  | 642.1  | 820.3  | 904.3  | 0.235583102 | 708.025  | 805.325  | 97.3    | 0.879179213 | 0.2449   | 1.135  |
| 102195_at   | 411.6  | 441.6  | 307.5  | 379.3  | 266.6  | 406.2  | 368.3  | 403.8  | 0.605343492 | 385      | 361.225  | 23.775  | 1.065817704 | 0.6063   | -1.071 |
| 102196_at   | 245    | 501.4  | 318.4  | 387.5  | 581    | 358.3  | 553.9  | 364.3  | 0.257518118 | 363.075  | 464.375  | 101.3   | 0.781857335 | 0.25     | 1.29   |
| 102197_at   | 332.6  | 163.3  | 212.7  | 240.6  | 141.3  | 313.6  | 296    | 203.8  | 0.980462966 | 237.3    | 238.675  | 1.375   | 0.994239028 | 0.9681   | -1.01  |
| 102198_at   | 148.4  | 145    | 125.1  | 228.1  | 266.3  | 184.8  | 232.7  | 187.1  | 0.11200863  | 161.65   | 217.725  | 56.075  | 0.742450339 | 0.09328  | 1.367  |
| 102199_at   | 402.3  | 333.9  | 432.3  | 330.1  | 325.7  | 363.6  | 368    | 326    | 0.357337338 | 374.65   | 345.825  | 28.825  | 1.083351406 | 0.3583   | -1.078 |
| 102200_at   | 72.1   | 77.2   | 76.5   | 127    | 98.3   | 78.3   | 85.2   | 86.4   | 0.937233651 | 88.2     | 87.05    | 1.15    | 1.013210798 | 0.9348   | -1.012 |
| 102201_s_at | 1226.9 | 1281.8 | 1125.4 | 1043.1 | 861.4  | 1091.8 | 891    | 1296   | 0.297065434 | 1169.3   | 1035.05  | 134.25  | 1.129703879 | 0.2561   | -1.142 |
| 102202_s_at | 277.5  | 338.8  | 314.2  | 271.4  | 413.7  | 361    | 316.3  | 275.5  | 0.280860341 | 300.475  | 341.625  | 41.15   | 0.879546286 | 0.2793   | 1.129  |
| 102203_at   | 9.9    | 19.9   | 11.1   | 10.8   | 15.2   | 11     | 9.9    | 14.8   | 0.943815678 | 12.925   | 12.725   | 0.2     | 1.015717092 | 0.9557   | -1.011 |
| 102204_at   | 48.8   | 67.8   | 24.2   | 34.6   | 54     | 59.2   | 52.7   | 51.5   | 0.349324202 | 43.85    | 54.35    | 10.5    | 0.806807728 | 0.2496   | 1.329  |
| 102205_at   | 60.1   | 73.1   | 107.6  | 64.1   | 41.9   | 78     | 63.8   | 58.5   | 0.282917593 | 76.225   | 60.55    | 15.675  | 1.258876961 | 0.2618   | -1.256 |
| 102206_at   | 166.7  | 106.8  | 154.1  | 127.1  | 207.4  | 112.6  | 152.2  | 143.2  | 0.552030701 | 138.675  | 153.85   | 15.175  | 0.901364966 | 0.5775   | -1.099 |
| 102207_at   | 252.5  | 652.6  | 581.9  | 625.6  | 450.8  | 837.1  | 774.4  | 741.1  | 0.221414038 | 528.15   | 700.85   | 172.7   | 0.753584933 | 0.2725   | 1.378  |
| 102208_at   | 264.8  | 221.8  | 280.8  | 248.7  | 236.7  | 317.1  | 240.4  | 230    | 0.936101326 | 254.025  | 256.05   | 2.025   | 0.992091388 | 0.975    | -1.003 |
| 102209_at   | 11.7   | 70.6   | 48.1   | 14.5   | 9.3    | 75.4   | 52.6   | 34.4   | 0.747707068 | 36.225   | 42.925   | 6.7     | 0.843913803 | 0.7663   | 1.218  |



|             |        |        |        |        |         |        |         |        |             |          |          |          |             |          |        |
|-------------|--------|--------|--------|--------|---------|--------|---------|--------|-------------|----------|----------|----------|-------------|----------|--------|
| 102210_at   | 335    | 422.8  | 357.3  | 347    | 419.6   | 345.2  | 460.3   | 362.2  | 0.381886295 | 365.525  | 396.825  | 31.3     | 0.921123921 | 0.3799   | -1.083 |
| 102211_r_at | 31.6   | 30.6   | 27.5   | 39     | 36.5    | 39.3   | 42.7    | 44.6   | 0.032426034 | 32.175   | 40.775   | 8.6      | 0.78908645  | 0.03095  | 1.272  |
| 102212_at   | 6.8    | 8.5    | 13.3   | 8.4    | 13.5    | 12.9   | 12      | 8.9    | 0.193457872 | 9.25     | 11.825   | 2.575    | 0.782241015 | 0.1666   | 1.305  |
| 102213_at   | 55.7   | 88.5   | 100.6  | 82.9   | 132.5   | 99.4   | 130.8   | 75.7   | 0.152503366 | 81.925   | 109.6    | 27.675   | 0.747490876 | 0.1676   | 1.335  |
| 102214_at   | 25.1   | 57.6   | 110.6  | 156.7  | 99.7    | 69     | 51.5    | 45.9   | 0.541186864 | 87.5     | 66.525   | 20.975   | 1.315295002 | 0.8141   | -1.114 |
| 102215_at   | 813.3  | 608.9  | 778.7  | 779.6  | 570.8   | 729.5  | 801.7   | 881    | 0.99408782  | 745.125  | 745.75   | 0.625    | 0.999161918 | 0.9631   | -1.006 |
| 102216_at   | 36.4   | 39.3   | 27.5   | 23.9   | 51.5    | 35.8   | 11.9    | 67.7   | 0.473387982 | 31.775   | 41.725   | 9.95     | 0.761533853 | 0.7839   | 1.121  |
| 102217_at   | 392.8  | 446.5  | 369.2  | 412.3  | 374.9   | 423.2  | 366.8   | 361.3  | 0.316902802 | 405.2    | 381.55   | 23.65    | 1.061984013 | 0.3099   | -1.062 |
| 102218_at   | 7.2    | 17.1   | 14.4   | 3.5    | 9.2     | 2.7    | 23.6    | 7.5    | 0.972250915 | 10.55    | 10.75    | 0.2      | 0.981395349 | 0.8872   | -1.089 |
| 102219_at   | 65.8   | 83.8   | 60.7   | 54.2   | 26.3    | 83.2   | 59.1    | 66.2   | 0.608362599 | 66.125   | 58.7     | 7.425    | 1.12649063  | 0.5075   | -1.207 |
| 102220_at   | 54.5   | 245.4  | 68.8   | 167.3  | 150.4   | 348.5  | 356     | 335.2  | 0.04970244  | 134      | 297.525  | 163.525  | 0.450382321 | 0.06667  | 2.525  |
| 102221_at   | 856.1  | 766.5  | 572.7  | 770.4  | 625.2   | 532.5  | 442.7   | 698.7  | 0.087914849 | 741.425  | 574.775  | 166.65   | 1.289939542 | 0.09726  | -1.295 |
| 102222_at   | 649.5  | 499.7  | 485.9  | 613    | 425     | 606.1  | 425.4   | 777.9  | 0.972535711 | 562.025  | 558.6    | 3.425    | 1.0061314   | 0.8547   | -1.032 |
| 102223_at   | 238.3  | 195.6  | 253.3  | 241.8  | 261.3   | 268.5  | 233.1   | 350    | 0.170402575 | 232.25   | 278.225  | 45.975   | 0.834756043 | 0.1433   | 1.19   |
| 102224_at   | 553.2  | 877.7  | 646.9  | 778.2  | 548.2   | 717.7  | 663.5   | 906.6  | 0.963009158 | 714      | 709      | 5        | 1.007052186 | 0.9574   | -1.008 |
| 102225_at   | 185.2  | 150    | 165.2  | 177.8  | 116.4   | 168    | 177.4   | 235    | 0.865086229 | 169.55   | 174.2    | 4.65     | 0.973306544 | 0.998    | -1     |
| 102226_at   | 39.9   | 54.7   | 95.3   | 17.1   | 63.9    | 39.1   | 17.2    | 21.4   | 0.440789043 | 51.75    | 35.4     | 16.35    | 1.461864407 | 0.4943   | -1.403 |
| 102227_g_at | 8.3    | 5.2    | 15.3   | 6.3    | 7.8     | 6.6    | 6.3     | 13     | 0.903464193 | 8.775    | 8.425    | 0.35     | 1.041543027 | 0.9912   | -1.003 |
| 102228_at   | 195    | 187.5  | 240.5  | 232.5  | 217.8   | 210.5  | 239.2   | 225    | 0.559013752 | 213.875  | 223.125  | 9.25     | 0.958543417 | 0.5152   | -1.048 |
| 102229_at   | 452.5  | 422.3  | 487.6  | 553.4  | 223.6   | 380.6  | 404.7   | 321.7  | 0.028411341 | 478.95   | 332.65   | 146.3    | 1.439801593 | 0.03822  | -1.469 |
| 102230_at   | 12.4   | 73     | 60.3   | 77.5   | 98      | 100.6  | 76.5    | 76.3   | 0.11869561  | 55.8     | 87.85    | 32.05    | 0.635173591 | 0.1903   | 1.92   |
| 102231_at   | 633.6  | 754.3  | 836.4  | 807.2  | 728.2   | 840.5  | 891.4   | 911.9  | 0.211234133 | 757.875  | 843      | 85.125   | 0.899021352 | 0.2238   | 1.114  |
| 102232_at   | 423.3  | 373.6  | 537.3  | 444.7  | 279.2   | 402.4  | 534.2   | 503    | 0.83148488  | 444.725  | 429.7    | 15.025   | 1.034966256 | 0.7457   | -1.058 |
| 102233_at   | 153.1  | 164.4  | 160.6  | 190.5  | 221.5   | 195.2  | 197.4   | 171    | 0.070900381 | 167.15   | 196.275  | 29.125   | 0.85161126  | 0.06499  | 1.173  |
| 102234_at   | 208.5  | 134.4  | 214.6  | 249    | 146.9   | 192.1  | 193     | 170.4  | 0.378906102 | 201.625  | 175.6    | 26.025   | 1.14820615  | 0.4489   | -1.127 |
| 102235_at   | 270.5  | 305.7  | 253.2  | 236    | 396.4   | 320.4  | 346.9   | 412.2  | 0.0095119   | 266.35   | 368.975  | 102.625  | 0.721864625 | 0.006715 | 1.385  |
| 102237_at   | 26.1   | 27.2   | 42.4   | 28.3   | 8.7     | 38     | 10.7    | 35.4   | 0.417157893 | 31       | 23.2     | 7.8      | 1.336206897 | 0.2808   | -1.612 |
| 102238_at   | 23.8   | 18.9   | 21.3   | 20.8   | 78.6    | 58.4   | 73.2    | 39.6   | 0.017245775 | 21.2     | 62.45    | 41.25    | 0.339471577 | 0.00062  | 2.86   |
| 102239_at   | 35.9   | 158.8  | 139.1  | 45.5   | 144.3   | 35.4   | 43.1    | 43.5   | 0.516295334 | 94.825   | 66.575   | 28.25    | 1.424333459 | 0.5291   | -1.394 |
| 102240_at   | 16.4   | 26.9   | 28.3   | 24.7   | 26.5    | 9.5    | 20.2    | 29.6   | 0.63394699  | 24.075   | 21.45    | 2.625    | 1.122377622 | 0.5499   | -1.197 |
| 102241_f_at | 340.7  | 346.9  | 249.9  | 339.7  | 291.1   | 333.8  | 246.8   | 388.3  | 0.914015373 | 319.3    | 315      | 4.3      | 1.013650794 | 0.8857   | -1.019 |
| 102242_at   | 172.9  | 222.5  | 191    | 230.8  | 263     | 250.8  | 268.6   | 264.1  | 0.020049272 | 204.3    | 261.625  | 57.325   | 0.780888677 | 0.01036  | 1.289  |
| 102243_at   | 28.3   | 22.2   | 36.3   | 16     | 24.9    | 6.5    | 14      | 5.9    | 0.082969926 | 25.7     | 12.825   | 12.875   | 2.003898635 | 0.07419  | -2.282 |
| 102244_at   | 64.8   | 68.2   | 42.2   | 63.7   | 51.1    | 61     | 89.4    | 53.9   | 0.7118741   | 59.725   | 63.85    | 4.125    | 0.935395458 | 0.7367   | -1.061 |
| 102247_at   | 104    | 90.5   | 99     | 107.5  | 71      | 109.4  | 100.3   | 119.1  | 0.979671397 | 100.25   | 99.95    | 0.3      | 1.003001501 | 0.8788   | -1.019 |
| 102248_f_at | 628.9  | 694.9  | 624.9  | 626.5  | 591.4   | 680.5  | 645     | 690.7  | 0.784021189 | 643.8    | 651.9    | 8.1      | 0.987574781 | 0.7979   | -1.012 |
| 102249_at   | 20.4   | 68.5   | 23.6   | 22.2   | 146.7   | 72     | 63.6    | 27.5   | 0.183798272 | 33.675   | 77.45    | 43.775   | 0.434796643 | 0.1206   | 2.241  |
| 102250_at   | 395.9  | 366.7  | 491.2  | 453.9  | 559.7   | 476.1  | 415.2   | 459.8  | 0.26447655  | 426.925  | 477.7    | 50.775   | 0.893709441 | 0.2579   | -1.12  |
| 102251_at   | 75.8   | 58.8   | 104.2  | 104.8  | 91.5    | 65.3   | 71.1    | 193.9  | 0.576364525 | 85.9     | 105.45   | 19.55    | 0.814604078 | 0.6599   | 1.14   |
| 102252_at   | 1128.9 | 1038.9 | 1026.2 | 1118.9 | 852.7   | 1126.8 | 1037.7  | 1102.3 | 0.512395584 | 1078.225 | 1029.875 | 48.35    | 1.046947445 | 0.4838   | -1.052 |
| 102253_at   | 5.6    | 11     | 6      | 11.1   | 4.2     | 9.5    | 4.7     | 15.7   | 0.975372761 | 8.425    | 8.525    | 0.1      | 0.988269795 | 0.8242   | -1.088 |
| 102254_f_at | 8      | 9.3    | 6.6    | 9.5    | 18.4    | 5.6    | 9.2     | 10     | 0.438034881 | 8.35     | 10.8     | 2.45     | 0.773148148 | 0.5239   | 1.19   |
| 102255_at   | 110.7  | 103.3  | 124.9  | 92.5   | 102.4   | 114.3  | 129.2   | 119.5  | 0.372679913 | 107.85   | 116.35   | 8.5      | 0.926944564 | 0.3635   | -1.081 |
| 102256_at   | 3.9    | 5      | 6.6    | 3.1    | 5.4     | 3.3    | 3.4     | 4.9    | 0.682144221 | 4.65     | 4.25     | 0.4      | 1.094117647 | 0.7777   | -1.063 |
| 102257_at   | 377.5  | 380.5  | 423.6  | 586.9  | 350.2   | 344.9  | 352.3   | 677.2  | 0.913277283 | 442.125  | 431.15   | 10.975   | 1.025455178 | 0.7928   | -1.055 |
| 102258_at   | 196    | 245.5  | 223.5  | 201.5  | 101.6   | 109.4  | 172.4   | 96.4   | 0.005528621 | 216.625  | 119.95   | 96.675   | 1.805960817 | 0.005011 | -1.85  |
| 102259_at   | 192.1  | 233.9  | 190.8  | 283.1  | 112.3   | 305.1  | 173     | 145.2  | 0.431438338 | 224.975  | 183.9    | 41.075   | 1.223355084 | 0.3063   | -1.296 |
| 102260_at   | 17.5   | 62.3   | 26.1   | 21.1   | 24.9    | 20.4   | 27.8    | 26.2   | 0.553155688 | 31.75    | 24.825   | 6.925    | 1.278952669 | 0.6925   | -1.127 |
| 102261_f_at | 206.2  | 330.6  | 248.8  | 305.4  | 368.1   | 245.1  | 283.5   | 439.2  | 0.288481989 | 272.75   | 333.975  | 61.225   | 0.816677895 | 0.2938   | 1.214  |
| 102262_r_at | 143.3  | 126.2  | 214.1  | 158.9  | 195.4   | 158.8  | 147.2   | 185.1  | 0.640231091 | 160.625  | 171.625  | 11       | 0.935906773 | 0.5642   | -1.083 |
| 102263_at   | 196.5  | 255.5  | 301.6  | 272.9  | 175.9   | 166.8  | 219.4   | 216.1  | 0.062863612 | 256.625  | 194.55   | 62.075   | 1.319069648 | 0.05639  | -1.313 |
| 102264_at   | 65.6   | 36.7   | 68.4   | 51     | 83.9    | 37.9   | 81.6    | 64.3   | 0.41093146  | 55.425   | 66.925   | 11.5     | 0.828165857 | 0.489    | 1.187  |
| 102265_at   | 10.8   | 34.1   | 40.8   | 44.6   | 94.6    | 48.8   | 55.1    | 79     | 0.033942376 | 32.575   | 69.375   | 36.8     | 0.46954955  | 0.05799  | 2.338  |
| 102266_at   | 8230.1 | 7953   | 7949.5 | 6908.8 | 10488.4 | 8108.9 | 10083.4 | 7988   | 0.117430386 | 7760.35  | 9167.175 | 1406.825 | 0.846536692 | 0.09425  | 1.175  |
| 102267_at   | 53.1   | 62.3   | 76.3   | 72.2   | 133.2   | 71.1   | 66.3    | 54.3   | 0.460443459 | 65.975   | 81.225   | 15.25    | 0.812249923 | 0.4843   | 1.169  |
| 102268_at   | 398    | 645.1  | 611.7  | 524    | 676.1   | 585.4  | 717.8   | 541.4  | 0.262115702 | 544.7    | 630.175  | 85.475   | 0.864363074 | 0.2616   | 1.169  |



|             |        |        |        |        |        |        |        |        |             |          |          |         |             |          |        |
|-------------|--------|--------|--------|--------|--------|--------|--------|--------|-------------|----------|----------|---------|-------------|----------|--------|
| 102269_at   | 18.2   | 11.8   | 17.1   | 11.8   | 23.5   | 16.7   | 14.1   | 12.1   | 0.559510945 | 14.725   | 16.6     | 1.875   | 0.887048193 | 0.577    | -1.114 |
| 102271_at   | 349.3  | 422.3  | 369.5  | 406.6  | 384.6  | 344.9  | 377.5  | 565.1  | 0.588270507 | 386.925  | 418.025  | 31.1    | 0.925602536 | 0.6227   | -1.063 |
| 102272_at   | 32.7   | 12.4   | 24.9   | 14.2   | 6      | 38.6   | 19.2   | 37.5   | 0.66064871  | 21.05    | 25.325   | 4.275   | 0.831194472 | 0.9432   | -1.037 |
| 102273_at   | 253.1  | 234.7  | 249.9  | 319.3  | 197.7  | 303.2  | 255.5  | 268    | 0.787448199 | 264.25   | 256.1    | 8.15    | 1.031823506 | 0.7586   | -1.037 |
| 102274_at   | 34.2   | 102.5  | 52.2   | 85.4   | 35.1   | 98.5   | 141.8  | 161.6  | 0.263362229 | 68.575   | 109.25   | 40.675  | 0.627688787 | 0.3774   | 1.501  |
| 102275_at   | 125.7  | 115.5  | 123.3  | 123.1  | 76.7   | 164.9  | 117.3  | 171.3  | 0.66477218  | 121.9    | 132.55   | 10.65   | 0.919652961 | 0.8558   | -1.036 |
| 102277_at   | 624.9  | 345.7  | 638.6  | 601.3  | 278.4  | 511.5  | 329.5  | 490.1  | 0.149177736 | 552.625  | 402.375  | 150.25  | 1.373407891 | 0.177    | -1.378 |
| 102278_at   | 264.1  | 207.1  | 284.9  | 222.1  | 249.1  | 264.9  | 284.4  | 172.4  | 0.953705639 | 244.55   | 242.7    | 1.85    | 1.007622579 | 0.9032   | -1.017 |
| 102279_at   | 324.1  | 350.8  | 354.2  | 339.6  | 464.4  | 339.5  | 361.2  | 557.4  | 0.176395213 | 342.175  | 430.625  | 88.45   | 0.794600871 | 0.1208   | 1.234  |
| 102280_at   | 89.1   | 124.3  | 129.3  | 120.9  | 103.2  | 145    | 98.6   | 155.5  | 0.594977603 | 115.9    | 125.575  | 9.675   | 0.92295441  | 0.6426   | -1.073 |
| 102281_at   | 16.3   | 25.8   | 36.2   | 29.1   | 28.3   | 30.3   | 35.5   | 20.2   | 0.75266162  | 26.85    | 28.575   | 1.725   | 0.939632546 | 0.7029   | -1.086 |
| 102282_g_at | 62.1   | 38     | 84.3   | 55.8   | 110.6  | 68.8   | 55.6   | 64.2   | 0.381029909 | 60.05    | 74.8     | 14.75   | 0.802807487 | 0.3529   | 1.251  |
| 102283_at   | 310.9  | 484.1  | 357    | 452.4  | 249.3  | 245.6  | 318.4  | 391.9  | 0.110733539 | 401.1    | 301.3    | 99.8    | 1.331231331 | 0.105    | -1.335 |
| 102284_at   | 2.5    | 6.6    | 14.5   | 10.2   | 8.5    | 15.7   | 3.1    | 4.3    | 0.890463219 | 8.45     | 7.9      | 0.55    | 1.069620253 | 0.8842   | -1.084 |
| 102285_at   | 98.2   | 95.9   | 100.8  | 100.2  | 89.6   | 85.9   | 92.9   | 92.1   | 0.005375247 | 98.775   | 90.125   | 8.65    | 1.095977809 | 0.00465  | -1.096 |
| 102286_at   | 223.9  | 347.3  | 369.8  | 273.7  | 362.7  | 274.3  | 309.9  | 480.4  | 0.383351679 | 303.675  | 356.825  | 53.15   | 0.851047432 | 0.3809   | 1.171  |
| 102287_at   | 20.4   | 18.9   | 32.8   | 41.3   | 38.8   | 71.1   | 54.5   | 11.2   | 0.322810381 | 28.35    | 43.9     | 15.55   | 0.645785877 | 0.5412   | 1.338  |
| 102288_at   | 32.3   | 46.5   | 14.5   | 38.2   | 52.7   | 16.3   | 43.1   | 78.6   | 0.359962149 | 32.875   | 47.675   | 14.8    | 0.689564761 | 0.4849   | 1.368  |
| 102289_r_at | 3.3    | 1.4    | 1.1    | 1.4    | 1.3    | 1.4    | 2.5    | 5.2    | 0.478352978 | 1.8      | 2.6      | 0.8     | 0.692307692 | 0.4516   | 1.375  |
| 102290_at   | 19.1   | 19.6   | 26.8   | 18.7   | 16.5   | 23.9   | 29.3   | 22.7   | 0.554283938 | 21.05    | 23.1     | 2.05    | 0.911255411 | 0.5885   | -1.087 |
| 102291_at   | 8.7    | 8.3    | 6.6    | 7.8    | 9.8    | 7.5    | 13.4   | 12.3   | 0.111838118 | 7.85     | 10.75    | 2.9     | 0.730232558 | 0.08708  | 1.341  |
| 102292_at   | 347.5  | 431.1  | 424    | 369.3  | 404.7  | 458.6  | 420.5  | 313.4  | 0.870654689 | 392.975  | 399.3    | 6.325   | 0.98415978  | 0.9177   | -1.011 |
| 102293_at   | 13.4   | 60.6   | 56.7   | 75.5   | 61.3   | 68.3   | 105.5  | 77.5   | 0.162735228 | 51.55    | 78.15    | 26.6    | 0.659628919 | 0.2144   | 1.773  |
| 102294_at   | 46.3   | 105    | 117.1  | 147.4  | 125.8  | 78     | 91.4   | 93.8   | 0.788610768 | 103.95   | 97.25    | 6.7     | 1.068894602 | 0.9983   | -1.001 |
| 102295_at   | 63.5   | 84.3   | 67.7   | 78.8   | 44.2   | 112.7  | 98.7   | 132    | 0.307531312 | 73.575   | 96.9     | 23.325  | 0.759287926 | 0.4461   | 1.228  |
| 102296_at   | 47.6   | 75.1   | 100.4  | 91     | 58.5   | 89.5   | 75     | 39.2   | 0.444027314 | 78.525   | 65.55    | 12.975  | 1.197940503 | 0.4694   | -1.207 |
| 102297_at   | 161.1  | 144.8  | 128.6  | 151.1  | 151.9  | 180.5  | 155.9  | 174.6  | 0.094958861 | 146.4    | 165.725  | 19.325  | 0.88339116  | 0.0979   | 1.133  |
| 102298_at   | 7.5    | 7.9    | 10.4   | 17.6   | 30.4   | 11.1   | 22.1   | 13.5   | 0.156926275 | 10.85    | 19.275   | 8.425   | 0.562905318 | 0.1141   | 1.745  |
| 102299_at   | 107.7  | 100.7  | 46.7   | 98.5   | 102    | 97.5   | 26.1   | 110.1  | 0.858744477 | 88.4     | 83.925   | 4.475   | 1.053321418 | 0.7368   | -1.15  |
| 102300_at   | 220.2  | 248    | 286.7  | 220.5  | 316.4  | 266.7  | 327.2  | 257.3  | 0.087609876 | 243.85   | 291.9    | 48.05   | 0.835388832 | 0.08281  | 1.198  |
| 102301_at   | 14.9   | 24.9   | 7.5    | 29.2   | 4.8    | 2.8    | 9.6    | 37.3   | 0.583937264 | 19.125   | 13.625   | 5.5     | 1.403669725 | 0.3107   | -2.029 |
| 102302_at   | 785.4  | 742.2  | 635.4  | 735.3  | 579.7  | 849.6  | 818    | 904.7  | 0.462599982 | 724.575  | 788      | 63.425  | 0.919511421 | 0.5309   | -1.076 |
| 102303_i_at | 295.7  | 315.3  | 366.2  | 358.4  | 399.8  | 361.2  | 338.4  | 339.6  | 0.289707674 | 333.9    | 359.75   | 25.85   | 0.928144545 | 0.2813   | -1.079 |
| 102304_f_at | 246.8  | 261.1  | 277.3  | 361.3  | 325.3  | 295.1  | 317.8  | 291.2  | 0.489455055 | 286.625  | 307.35   | 20.725  | 0.932568733 | 0.4034   | -1.083 |
| 102305_at   | 125.6  | 99.3   | 104.5  | 110.4  | 150.5  | 131.1  | 161.9  | 136.9  | 0.00835408  | 109.95   | 145.1    | 35.15   | 0.757753274 | 0.007005 | 1.32   |
| 102306_at   | 241.4  | 264.2  | 302.8  | 341.4  | 204.9  | 294.8  | 222.1  | 366.3  | 0.734914289 | 287.45   | 272.025  | 15.425  | 1.056704347 | 0.6495   | -1.076 |
| 102307_at   | 44.7   | 9.6    | 43.3   | 35.4   | 31.5   | 31.3   | 74     | 47.8   | 0.358905679 | 33.25    | 46.15    | 12.9    | 0.720476706 | 0.3588   | 1.516  |
| 102308_at   | 663.2  | 983.2  | 928.7  | 826.4  | 866.9  | 875.3  | 870.9  | 782    | 0.983852269 | 850.375  | 848.775  | 1.6     | 1.00188507  | 0.9327   | -1.008 |
| 102309_at   | 714.1  | 731.1  | 778.9  | 747.1  | 599.2  | 845.4  | 568.5  | 763.4  | 0.519407571 | 742.8    | 694.125  | 48.675  | 1.070124257 | 0.4358   | -1.084 |
| 102310_at   | 154.8  | 118.4  | 150.1  | 152.1  | 175.7  | 154.4  | 175    | 224.4  | 0.076776793 | 143.85   | 182.375  | 38.525  | 0.788759424 | 0.05921  | 1.263  |
| 102311_at   | 32.3   | 44.2   | 40.2   | 51.9   | 50.9   | 45.1   | 48.6   | 44.6   | 0.305181141 | 42.15    | 47.3     | 5.15    | 0.891120507 | 0.2668   | 1.136  |
| 102312_r_at | 151.9  | 172.8  | 190.1  | 236.6  | 248.5  | 203.1  | 210.5  | 157.9  | 0.532367847 | 187.85   | 205      | 17.15   | 0.916341463 | 0.5315   | -1.092 |
| 102313_at   | 71.8   | 102    | 104.7  | 63.2   | 119.2  | 125.6  | 84.1   | 71.5   | 0.419376081 | 85.425   | 100.1    | 14.675  | 0.853396603 | 0.4361   | 1.168  |
| 102314_at   | 88.5   | 141.2  | 91.9   | 123.8  | 113.9  | 100.1  | 120.2  | 135.5  | 0.697256909 | 111.35   | 117.425  | 6.075   | 0.94826485  | 0.6264   | -1.069 |
| 102315_at   | 2111.4 | 1378.7 | 1686.4 | 1754.8 | 1024.5 | 1910.8 | 1452.7 | 1581.1 | 0.350964675 | 1732.825 | 1492.275 | 240.55  | 1.16119683  | 0.3406   | -1.177 |
| 102316_at   | 317.1  | 430.4  | 380.7  | 429.7  | 354.6  | 425.9  | 421.8  | 340.5  | 0.91728485  | 389.475  | 385.7    | 3.775   | 1.0097874   | 0.9394   | -1.007 |
| 102317_at   | 870.9  | 897.7  | 907.5  | 892.9  | 838.9  | 907.8  | 788.7  | 969.3  | 0.714511982 | 892.25   | 876.175  | 16.075  | 1.018346791 | 0.6614   | -1.021 |
| 102318_at   | 147.4  | 119.8  | 105.1  | 191.4  | 108.1  | 156.8  | 125.5  | 209.2  | 0.769137404 | 140.925  | 149.9    | 8.975   | 0.940126751 | 0.7808   | -1.058 |
| 102319_at   | 670.1  | 555.6  | 564.5  | 585    | 477.7  | 683.4  | 468.9  | 591.2  | 0.534743225 | 593.8    | 555.3    | 38.5    | 1.069331893 | 0.4719   | -1.08  |
| 102320_at   | 619.6  | 427    | 483.9  | 413.6  | 383.3  | 424.2  | 375    | 562.1  | 0.465453091 | 486.025  | 436.15   | 49.875  | 1.11435286  | 0.4372   | -1.115 |
| 102321_at   | 154.7  | 347    | 272    | 246.5  | 236    | 335.3  | 394.8  | 370.4  | 0.185988427 | 255.05   | 334.125  | 79.075  | 0.763337074 | 0.2032   | 1.339  |
| 102322_at   | 2763.9 | 2472.8 | 2509   | 2849.4 | 2106.6 | 2765.6 | 2451.5 | 2467.4 | 0.271084003 | 2648.775 | 2447.775 | 201     | 1.082115391 | 0.2618   | -1.085 |
| 102323_at   | 434.8  | 507.6  | 581.7  | 608.9  | 593    | 662.9  | 658.1  | 677.1  | 0.053607148 | 533.25   | 647.775  | 114.525 | 0.823202501 | 0.04808  | 1.223  |
| 102324_at   | 240.9  | 286.9  | 277.7  | 320.8  | 343.6  | 271.9  | 346.2  | 296.9  | 0.226475198 | 281.575  | 314.65   | 33.075  | 0.894883204 | 0.2304   | -1.118 |
| 102326_at   | 92.2   | 81.1   | 57.3   | 42.6   | 29.1   | 56.8   | 86.7   | 61.6   | 0.571676634 | 68.3     | 58.55    | 9.75    | 1.166524338 | 0.5513   | -1.199 |
| 102327_at   | 136.6  | 272.9  | 147    | 203.1  | 393.3  | 222.7  | 323.2  | 174.1  | 0.189572696 | 189.9    | 278.325  | 88.425  | 0.682295877 | 0.1758   | 1.451  |



|             |        |        |        |        |         |        |         |        |             |          |           |         |             |          |        |
|-------------|--------|--------|--------|--------|---------|--------|---------|--------|-------------|----------|-----------|---------|-------------|----------|--------|
| 102328_at   | 252.7  | 129.3  | 192.3  | 164.2  | 172.4   | 141.2  | 159.8   | 170    | 0.436389831 | 184.625  | 160.85    | 23.775  | 1.147808517 | 0.4798   | -1.118 |
| 102329_at   | 38.6   | 18.1   | 68.8   | 18.9   | 37.5    | 23.6   | 54.8    | 16.6   | 0.845692192 | 36.1     | 33.125    | 2.975   | 1.089811321 | 0.9422   | -1.032 |
| 102330_at   | 31.8   | 16.5   | 22.4   | 15.6   | 44.1    | 67.9   | 16.5    | 39.5   | 0.146554831 | 21.575   | 42        | 20.425  | 0.513690476 | 0.1319   | 1.807  |
| 102331_at   | 844.2  | 738.5  | 887    | 925.7  | 746.1   | 1134.3 | 965.5   | 845.4  | 0.466789578 | 848.85   | 922.825   | 73.975  | 0.919838539 | 0.492    | -1.078 |
| 102332_at   | 247.7  | 415.5  | 335.5  | 295.2  | 239.3   | 351.6  | 292.3   | 328.5  | 0.652781803 | 323.475  | 302.925   | 20.55   | 1.067838574 | 0.6884   | -1.06  |
| 102333_at   | 754.5  | 855.6  | 1041   | 967.1  | 899.8   | 801.5  | 1116.7  | 1049.9 | 0.536467055 | 904.55   | 966.975   | 62.425  | 0.935443005 | 0.5472   | -1.068 |
| 102334_at   | 114    | 110.2  | 185.9  | 133    | 163.4   | 133.5  | 155.4   | 145.9  | 0.501762269 | 135.775  | 149.55    | 13.775  | 0.907890338 | 0.3959   | 1.123  |
| 102335_at   | 513.5  | 446.5  | 381.4  | 485.3  | 460.5   | 530.6  | 469.2   | 711.1  | 0.249126266 | 456.675  | 542.85    | 86.175  | 0.84125449  | 0.2206   | 1.177  |
| 102336_at   | 497.7  | 819.7  | 513.9  | 767.9  | 858.6   | 751.7  | 801.3   | 719    | 0.214822703 | 649.8    | 782.65    | 132.85  | 0.830256181 | 0.1761   | 1.233  |
| 102337_s_at | 39.8   | 21.4   | 16.7   | 7.7    | 40.7    | 54.1   | 22.2    | 28.1   | 0.179648224 | 21.4     | 36.275    | 14.875  | 0.589937974 | 0.158    | 1.881  |
| 102338_at   | 151.9  | 137.5  | 126.6  | 133.8  | 88.1    | 110.5  | 98.3    | 130.7  | 0.035959212 | 137.45   | 106.9     | 30.55   | 1.285781104 | 0.03089  | -1.297 |
| 102340_at   | 112    | 141.2  | 142    | 168.2  | 167.8   | 168.6  | 200.4   | 164.9  | 0.054707857 | 140.85   | 175.425   | 34.575  | 0.802907225 | 0.05501  | 1.254  |
| 102341_at   | 9.5    | 20     | 8      | 7.4    | 9.2     | 10.8   | 7.9     | 40.9   | 0.520541305 | 11.225   | 17.2      | 5.975   | 0.652616279 | 0.5737   | 1.299  |
| 102342_at   | 284.6  | 307.9  | 307.6  | 247.6  | 254.9   | 210.1  | 325.3   | 369    | 0.943204876 | 286.925  | 289.825   | 2.9     | 0.989993962 | 0.9461   | -1.01  |
| 102343_at   | 1268.5 | 1121.1 | 1379.4 | 1218.4 | 1490.1  | 1342   | 1251.3  | 1297.9 | 0.234827046 | 1246.85  | 1345.325  | 98.475  | 0.926802074 | 0.2287   | -1.08  |
| 102344_s_at | 77.7   | 120.7  | 100.4  | 107    | 227.2   | 215.8  | 167.1   | 199.3  | 0.001128113 | 101.45   | 202.35    | 100.9   | 0.501359031 | 0.000907 | 2.006  |
| 102345_at   | 139.1  | 172.7  | 279.7  | 156.6  | 280.5   | 208.9  | 272.9   | 194.7  | 0.229187768 | 187.025  | 239.25    | 52.225  | 0.781713689 | 0.1807   | 1.311  |
| 102346_at   | 744.8  | 552.3  | 512    | 589.3  | 305.6   | 562.4  | 420.9   | 529.3  | 0.110409123 | 599.6    | 454.55    | 145.05  | 1.319106809 | 0.1161   | -1.342 |
| 102348_at   | 272    | 358.5  | 325.7  | 508.9  | 500.6   | 573.7  | 533.5   | 713.4  | 0.021325777 | 366.275  | 580.3     | 214.025 | 0.631182147 | 0.02031  | 1.613  |
| 102349_at   | 269.3  | 377.1  | 327.9  | 227.7  | 319.4   | 343.5  | 273.8   | 240.6  | 0.883079751 | 300.5    | 294.325   | 6.175   | 1.020980209 | 0.9331   | -1.012 |
| 102350_at   | 214.3  | 532.2  | 299.2  | 416.3  | 274.7   | 380.3  | 457     | 352.3  | 0.994486346 | 365.5    | 366.075   | 0.575   | 0.998429284 | 0.8573   | -1.043 |
| 102351_at   | 82.1   | 76.2   | 101.7  | 91.2   | 84.1    | 65.6   | 50.8    | 71.1   | 0.067776605 | 87.8     | 67.9      | 19.9    | 1.293078056 | 0.07142  | -1.307 |
| 102352_at   | 164.4  | 255    | 179.6  | 154.1  | 188.1   | 192.3  | 230.1   | 147.8  | 0.965072732 | 188.275  | 189.575   | 1.3     | 0.993142556 | 0.9226   | -1.015 |
| 102353_at   | 43     | 42.5   | 27.3   | 30.1   | 59.3    | 43.8   | 60.5    | 41.6   | 0.054001925 | 35.725   | 51.3      | 15.575  | 0.696393762 | 0.05313  | 1.444  |
| 102354_at   | 975.2  | 1271.5 | 1103.3 | 878.1  | 1305.3  | 872.4  | 805.3   | 786.3  | 0.474177083 | 1057.025 | 942.325   | 114.7   | 1.121720213 | 0.4051   | -1.136 |
| 102356_at   | 328.6  | 247.8  | 340.1  | 312.5  | 286     | 308.5  | 261.5   | 271.5  | 0.32664167  | 307.25   | 281.875   | 25.375  | 1.090022173 | 0.3506   | -1.084 |
| 102357_at   | 388.3  | 334.8  | 522.2  | 427.2  | 315.9   | 335.2  | 430.8   | 366.9  | 0.285317831 | 418.125  | 362.2     | 55.925  | 1.154403644 | 0.2775   | -1.147 |
| 102360_at   | 182.9  | 321.9  | 270.5  | 395.3  | 243.6   | 286.4  | 320.9   | 412.7  | 0.699693364 | 292.65   | 315.9     | 23.25   | 0.92640076  | 0.6446   | -1.101 |
| 102362_i_at | 13.7   | 11.1   | 10.6   | 17.9   | 19.9    | 11.3   | 15.4    | 10.9   | 0.710004946 | 13.325   | 14.375    | 1.05    | 0.926956522 | 0.7377   | -1.067 |
| 102363_r_at | 91.3   | 67.8   | 109.3  | 163.3  | 171.9   | 151.5  | 194.2   | 162.4  | 0.047322879 | 107.925  | 170       | 62.075  | 0.634852941 | 0.03937  | 1.651  |
| 102364_at   | 7642.4 | 9020.9 | 6866.2 | 6777.8 | 15676.8 | 8143.3 | 11240.5 | 6122.3 | 0.285115383 | 7576.825 | 10295.725 | 2718.9  | 0.73591952  | 0.2828   | 1.286  |
| 102366_at   | 11     | 12.1   | 11.7   | 10.9   | 14      | 10.1   | 7.5     | 13.5   | 0.928835467 | 11.425   | 11.275    | 0.15    | 1.013303769 | 0.7923   | -1.041 |
| 102368_at   | 527.3  | 704.1  | 551.1  | 529.4  | 668.3   | 617.6  | 551.9   | 666.7  | 0.382777789 | 577.975  | 626.125   | 48.15   | 0.923098423 | 0.3449   | -1.088 |
| 102370_at   | 1325.6 | 1254.1 | 1230.8 | 1123.1 | 1355.3  | 1414.1 | 1404.2  | 1266.2 | 0.058978363 | 1233.4   | 1359.95   | 126.55  | 0.906945108 | 0.06068  | -1.103 |
| 102371_at   | 399.6  | 494.9  | 467.7  | 469.2  | 337.7   | 388.8  | 349.2   | 328.9  | 0.006638618 | 457.85   | 351.15    | 106.7   | 1.30385875  | 0.004197 | -1.303 |
| 102372_at   | 48.4   | 40.4   | 45.2   | 36.8   | 60.8    | 38.3   | 68.6    | 52.6   | 0.151743911 | 42.7     | 55.075    | 12.375  | 0.7753064   | 0.1394   | 1.268  |
| 102373_at   | 1734.9 | 1292   | 1450.7 | 1399.1 | 852     | 964.6  | 910.5   | 1145.9 | 0.00627671  | 1469.175 | 968.25    | 500.925 | 1.517350891 | 0.003363 | -1.518 |
| 102374_at   | 248.9  | 335.4  | 322.9  | 266.8  | 265     | 341.8  | 241.4   | 380.1  | 0.739461332 | 293.5    | 307.075   | 13.575  | 0.955792559 | 0.7876   | -1.037 |
| 102375_at   | 377.5  | 386.6  | 393.2  | 312    | 430.3   | 430.1  | 391.2   | 343.5  | 0.301935714 | 367.325  | 398.775   | 31.45   | 0.921133471 | 0.3194   | -1.086 |
| 102376_r_at | 94.6   | 171.2  | 98.6   | 97.8   | 141.2   | 282.2  | 102     | 179    | 0.226280054 | 115.55   | 176.1     | 60.55   | 0.656161272 | 0.185    | 1.47   |
| 102378_at   | 725.2  | 780.3  | 776.2  | 669.8  | 572.4   | 768.5  | 731.5   | 636.2  | 0.294552296 | 737.875  | 677.15    | 60.725  | 1.089677324 | 0.2777   | -1.095 |
| 102379_at   | 314.5  | 319.1  | 249.8  | 300.8  | 188.3   | 250.9  | 242.5   | 323    | 0.221148633 | 296.05   | 251.175   | 44.875  | 1.178660297 | 0.2013   | -1.195 |
| 102380_s_at | 39.2   | 298.5  | 241.5  | 241.2  | 223.1   | 265.3  | 255.6   | 334    | 0.354469844 | 205.1    | 269.5     | 64.4    | 0.761038961 | 0.3389   | 1.65   |
| 102381_at   | 821.3  | 641.1  | 612.3  | 704.6  | 669     | 749.1  | 745.7   | 831.7  | 0.383492304 | 694.825  | 748.875   | 54.05   | 0.927825071 | 0.3575   | -1.082 |
| 102382_at   | 330.4  | 339.3  | 320.9  | 278.2  | 209.8   | 225.8  | 249.5   | 271.5  | 0.006499348 | 317.2    | 239.15    | 78.05   | 1.326364207 | 0.007435 | -1.329 |
| 102383_at   | 292.8  | 433.8  | 435.9  | 348.2  | 414.1   | 415.6  | 468.1   | 387    | 0.320110976 | 377.675  | 421.2     | 43.525  | 0.896664292 | 0.2906   | -1.128 |
| 102384_at   | 979.8  | 916.7  | 817.9  | 995.4  | 822.1   | 1019.2 | 929.6   | 1070.8 | 0.64550719  | 927.45   | 960.425   | 32.975  | 0.965666242 | 0.6695   | -1.033 |
| 102385_at   | 859.3  | 606.9  | 784.1  | 819.5  | 531.1   | 764.2  | 706.3   | 676.6  | 0.23780455  | 767.45   | 669.55    | 97.9    | 1.146217609 | 0.2616   | -1.147 |
| 102387_at   | 1913.4 | 1577.8 | 1730.9 | 1825.7 | 1247.2  | 1760.6 | 1477.6  | 1664.6 | 0.154040282 | 1761.95  | 1537.5    | 224.45  | 1.14598374  | 0.1522   | -1.153 |
| 102389_s_at | 67.7   | 73     | 60.1   | 71.1   | 67.3    | 55.7   | 70.9    | 79.9   | 0.937633274 | 67.975   | 68.45     | 0.475   | 0.993060628 | 0.9871   | -1.001 |
| 102393_at   | 32.5   | 31.7   | 36.9   | 32.8   | 74.3    | 43.9   | 90.3    | 77.8   | 0.029581374 | 33.475   | 71.575    | 38.1    | 0.467691233 | 0.004024 | 2.069  |
| 102395_at   | 2959   | 2468.1 | 2317.4 | 2296.2 | 2588.1  | 2922   | 2822.7  | 2518   | 0.315328638 | 2510.175 | 2712.7    | 202.525 | 0.92534191  | 0.2817   | -1.084 |
| 102396_at   | 392.8  | 520.8  | 533.2  | 442.2  | 567.2   | 515.5  | 607.4   | 612.4  | 0.047390378 | 472.25   | 575.625   | 103.375 | 0.820412595 | 0.04856  | 1.225  |
| 102397_at   | 161.4  | 370.2  | 189.7  | 252.3  | 171.7   | 200    | 232.6   | 149.3  | 0.332333441 | 243.4    | 188.4     | 55      | 1.291932059 | 0.3286   | -1.244 |
| 102398_at   | 935    | 804.6  | 944.7  | 1036.1 | 1237.9  | 982.4  | 1120.1  | 1203.6 | 0.033212182 | 930.1    | 1136      | 205.9   | 0.81875     | 0.03452  | 1.222  |
| 102399_at   | 394.7  | 656    | 548.9  | 429.4  | 378.6   | 579.7  | 552.6   | 593.5  | 0.816656738 | 507.25   | 526.1     | 18.85   | 0.96417031  | 0.801    | -1.042 |



|             |        |        |        |        |        |        |        |        |             |          |          |         |             |          |        |
|-------------|--------|--------|--------|--------|--------|--------|--------|--------|-------------|----------|----------|---------|-------------|----------|--------|
| 102400_at   | 339.4  | 277.5  | 322.9  | 317.5  | 313.4  | 318.7  | 322.2  | 323.1  | 0.729694488 | 314.325  | 319.35   | 5.025   | 0.984264913 | 0.6866   | -1.019 |
| 102401_at   | 352.5  | 289    | 443.2  | 417.8  | 367.4  | 419.2  | 435.2  | 404.8  | 0.454661345 | 375.625  | 406.65   | 31.025  | 0.92370589  | 0.4107   | 1.095  |
| 102402_at   | 2143.1 | 2302.7 | 2237.6 | 1827.4 | 2998.7 | 1986.2 | 2283.5 | 2331.1 | 0.311899132 | 2127.7   | 2399.875 | 272.175 | 0.886587843 | 0.3021   | -1.12  |
| 102403_at   | 771.2  | 583.9  | 707.4  | 514.2  | 428.1  | 490.9  | 477.1  | 380.7  | 0.033450747 | 644.175  | 444.2    | 199.975 | 1.450191355 | 0.01526  | -1.439 |
| 102404_at   | 21.5   | 29.7   | 18.7   | 32.9   | 33.4   | 10.3   | 34.3   | 21.3   | 0.899694715 | 25.7     | 24.825   | 0.875   | 1.035246727 | 0.7374   | -1.115 |
| 102405_at   | 19.9   | 9.9    | 12.7   | 7      | 10.4   | 14.3   | 8.4    | 12.1   | 0.740406295 | 12.375   | 11.3     | 1.075   | 1.095132743 | 0.8951   | -1.035 |
| 102406_at   | 5.4    | 9.1    | 22     | 6.9    | 4.4    | 2.8    | 16.3   | 2.8    | 0.426431936 | 10.85    | 6.575    | 4.275   | 1.650190114 | 0.2586   | -1.907 |
| 102407_at   | 398.5  | 328.4  | 416.5  | 202.4  | 345.7  | 201.4  | 141    | 274.2  | 0.195630457 | 336.45   | 240.575  | 95.875  | 1.398524369 | 0.216    | -1.423 |
| 102408_g_at | 11.5   | 18.7   | 27.1   | 13.3   | 18.2   | 12     | 12.2   | 11.8   | 0.342900475 | 17.65    | 13.55    | 4.1     | 1.302583026 | 0.343    | -1.252 |
| 102409_at   | 1926.1 | 1634.1 | 1868.2 | 1942.1 | 1485.5 | 1681.9 | 1739.7 | 1454.4 | 0.045882388 | 1842.625 | 1590.375 | 252.25  | 1.158610391 | 0.04865  | -1.159 |
| 102410_at   | 88.5   | 94     | 86     | 103.4  | 99.9   | 74.9   | 102.1  | 84.1   | 0.733507009 | 92.975   | 90.25    | 2.725   | 1.030193906 | 0.6895   | -1.036 |
| 102411_at   | 231.3  | 235.7  | 259.1  | 259.4  | 206.3  | 257.7  | 278.6  | 203.1  | 0.649415764 | 246.375  | 236.425  | 9.95    | 1.042085228 | 0.5839   | -1.05  |
| 102412_at   | 1221.5 | 1279.6 | 1398.3 | 1508.8 | 979.4  | 1361.4 | 1248   | 1475.5 | 0.519397455 | 1352.05  | 1266.075 | 85.975  | 1.06790672  | 0.4899   | -1.077 |
| 102413_at   | 257.4  | 200.8  | 204.7  | 173.2  | 251.5  | 194    | 241.8  | 258.6  | 0.276109337 | 209.025  | 236.475  | 27.45   | 0.883920076 | 0.2694   | 1.136  |
| 102414_i_at | 771.2  | 404.9  | 542.8  | 462.7  | 425.8  | 539.7  | 430.9  | 651.8  | 0.743298414 | 545.4    | 512.05   | 33.35   | 1.065130358 | 0.7869   | -1.05  |
| 102415_r_at | 111.6  | 82.1   | 100.5  | 158.4  | 115.2  | 131.7  | 149.1  | 130.1  | 0.356624352 | 113.15   | 131.525  | 18.375  | 0.86029272  | 0.2785   | 1.192  |
| 102416_at   | 3724.3 | 2788.8 | 3090.2 | 2451.1 | 3465.5 | 2676.4 | 3745.5 | 2930.1 | 0.619499005 | 3013.6   | 3204.375 | 190.775 | 0.940464209 | 0.6017   | -1.067 |
| 102418_at   | 549.5  | 696    | 840.2  | 832.4  | 608.8  | 1466.3 | 732.4  | 1030.6 | 0.323497635 | 729.525  | 959.525  | 230     | 0.760298064 | 0.3304   | 1.26   |
| 102419_at   | 20.7   | 31.1   | 27.7   | 28.5   | 36.6   | 34.1   | 32.2   | 32.7   | 0.045130053 | 27       | 33.9     | 6.9     | 0.796460177 | 0.04301  | 1.268  |
| 102421_at   | 558.9  | 599.4  | 525.8  | 489.9  | 521.3  | 488.2  | 539.6  | 487.4  | 0.257605364 | 543.5    | 509.125  | 34.375  | 1.0675178   | 0.2497   | -1.066 |
| 102423_at   | 107.7  | 93.6   | 117.1  | 114    | 80.5   | 87.4   | 83.3   | 90.7   | 0.015736779 | 108.1    | 85.475   | 22.625  | 1.26469728  | 0.006341 | -1.261 |
| 102424_at   | 52.7   | 26.7   | 21.5   | 64.7   | 24.5   | 75.3   | 20.1   | 50.2   | 0.947762855 | 41.4     | 42.525   | 1.125   | 0.973544974 | 0.9766   | -1.012 |
| 102425_at   | 339.4  | 547.4  | 314.1  | 351    | 587.3  | 459.9  | 453.9  | 413.1  | 0.222074223 | 387.975  | 478.55   | 90.575  | 0.810730331 | 0.1724   | 1.254  |
| 102426_at   | 195.3  | 177.6  | 231.3  | 204.5  | 193.7  | 254.2  | 189.3  | 231.9  | 0.464287799 | 202.175  | 217.275  | 15.1    | 0.930502819 | 0.4721   | -1.071 |
| 102427_at   | 2500.4 | 1977.2 | 2276.3 | 2217.2 | 1634.4 | 2281.2 | 1744.9 | 2052.1 | 0.139591869 | 2242.775 | 1928.15  | 314.625 | 1.163174546 | 0.1329   | -1.169 |
| 102429_at   | 304.6  | 327.5  | 243    | 320.7  | 366.8  | 336.4  | 365.1  | 309    | 0.108413948 | 298.95   | 344.325  | 45.375  | 0.868220431 | 0.1169   | 1.157  |
| 102430_at   | 262.8  | 197    | 241.7  | 209.7  | 281.2  | 225.3  | 284.4  | 295    | 0.090710434 | 227.8    | 271.475  | 43.675  | 0.839119624 | 0.09691  | 1.193  |
| 102431_at   | 53     | 94.4   | 21.3   | 21.7   | 119.9  | 86.1   | 102.4  | 51.5   | 0.111265252 | 47.6     | 89.975   | 42.375  | 0.529035843 | 0.1007   | 2.2    |
| 102476_f_at | 798.5  | 878.2  | 599.9  | 864.1  | 879    | 944.5  | 915.1  | 747.4  | 0.313486733 | 785.175  | 871.5    | 86.325  | 0.900946644 | 0.3191   | 1.118  |
| 102477_at   | 51     | 10.9   | 77.6   | 66.9   | 53.8   | 55.7   | 46     | 37.2   | 0.834501335 | 51.6     | 48.175   | 3.425   | 1.071094966 | 0.767    | 1.153  |
| 102478_f_at | 187.6  | 154.1  | 208.2  | 236.6  | 146.1  | 203.7  | 281.8  | 210.5  | 0.689105921 | 196.625  | 210.525  | 13.9    | 0.933974587 | 0.751    | -1.055 |
| 102552_at   | 12.3   | 8.2    | 12     | 8.9    | 11.1   | 6.7    | 9.2    | 9.1    | 0.376284719 | 10.35    | 9.025    | 1.325   | 1.146814404 | 0.3918   | -1.146 |
| 102553_at   | 4.4    | 3.9    | 17     | 27.9   | 11.3   | 16.2   | 17.7   | 6.4    | 0.952157955 | 13.3     | 12.9     | 0.4     | 1.031007752 | 0.6844   | 1.26   |
| 102554_at   | 5.9    | 9      | 9.1    | 5.3    | 10.8   | 6.7    | 8.4    | 8.8    | 0.343661316 | 7.325    | 8.675    | 1.35    | 0.844380403 | 0.3252   | 1.2    |
| 102555_at   | 12.4   | 11.8   | 7.4    | 6      | 18.2   | 14.8   | 7.7    | 10.6   | 0.273197837 | 9.4      | 12.825   | 3.425   | 0.73294347  | 0.2806   | 1.359  |
| 102556_at   | 9.3    | 30.7   | 18.3   | 10     | 6.2    | 10.1   | 7      | 9.5    | 0.172101061 | 17.075   | 8.2      | 8.875   | 2.082317073 | 0.08024  | -1.891 |
| 102557_at   | 86.7   | 62     | 112.6  | 120.5  | 52.9   | 47     | 39.5   | 24.5   | 0.01851662  | 95.45    | 40.975   | 54.475  | 2.329469189 | 0.00928  | -2.347 |
| 102558_at   | 160.9  | 95     | 172.1  | 131.3  | 81.7   | 149    | 44     | 98.9   | 0.148443728 | 139.825  | 93.4     | 46.425  | 1.497055675 | 0.1535   | -1.597 |
| 102559_at   | 10.3   | 5      | 8.9    | 23.9   | 8.9    | 8.1    | 9.6    | 8.8    | 0.497015672 | 12.025   | 8.85     | 3.175   | 1.358757062 | 0.6765   | -1.154 |
| 102560_at   | 8.2    | 4.7    | 7.6    | 12.6   | 13.4   | 8.6    | 9.3    | 10.3   | 0.323128382 | 8.275    | 10.4     | 2.125   | 0.795673077 | 0.2745   | 1.312  |
| 102561_at   | 277.4  | 217.7  | 251.3  | 210.6  | 345    | 175.1  | 285.5  | 270.5  | 0.48087277  | 239.25   | 269.025  | 29.775  | 0.889322554 | 0.5694   | -1.099 |
| 102562_at   | 168.2  | 184.5  | 134.4  | 199.2  | 107.3  | 147.5  | 239.9  | 157    | 0.793544451 | 171.575  | 162.925  | 8.65    | 1.053091913 | 0.6713   | -1.087 |
| 102566_at   | 12.3   | 46.6   | 53     | 17.1   | 24.9   | 52.2   | 20.1   | 17     | 0.786717725 | 32.25    | 28.55    | 3.7     | 1.129597198 | 0.9328   | -1.039 |
| 102567_at   | 9.8    | 10.8   | 10.5   | 11.8   | 9.9    | 7.1    | 12.9   | 8.4    | 0.435343022 | 10.725   | 9.575    | 1.15    | 1.120104439 | 0.3356   | -1.149 |
| 102568_at   | 10.3   | 13.6   | 58.3   | 16.7   | 9.6    | 17.7   | 12.4   | 41.1   | 0.748257325 | 24.725   | 20.2     | 4.525   | 1.224009901 | 0.8267   | -1.12  |
| 102569_at   | 7.5    | 12.5   | 6.2    | 7.8    | 10.7   | 9.6    | 10.4   | 7.3    | 0.555781356 | 8.5      | 9.5      | 1       | 0.894736842 | 0.4625   | 1.143  |
| 102570_at   | 91     | 105.3  | 150.3  | 152.9  | 103.4  | 77.8   | 111.2  | 136.8  | 0.412324771 | 124.875  | 107.3    | 17.575  | 1.163793103 | 0.4319   | -1.159 |
| 102571_at   | 6.6    | 9.6    | 8.1    | 14.7   | 12.7   | 14.1   | 15.7   | 13.5   | 0.089689321 | 9.75     | 14       | 4.25    | 0.696428571 | 0.06173  | 1.497  |
| 102572_at   | 53.1   | 40     | 68.8   | 54.9   | 71.9   | 48.1   | 45.3   | 50.5   | 0.977394995 | 54.2     | 53.95    | 0.25    | 1.00463392  | 0.9841   | -1.003 |
| 102573_at   | 13     | 28.3   | 9.5    | 50.4   | 12.5   | 7.1    | 11.4   | 9.9    | 0.203704065 | 25.3     | 10.225   | 15.075  | 2.474327628 | 0.1217   | -2.047 |
| 102574_at   | 141.6  | 104.4  | 169.2  | 138.2  | 152.2  | 150.1  | 149.8  | 59.7   | 0.709851542 | 138.35   | 127.95   | 10.4    | 1.081281751 | 0.621    | -1.14  |
| 102575_at   | 87.4   | 65.9   | 83.6   | 88     | 99.7   | 58.4   | 98     | 125.3  | 0.394822833 | 81.225   | 95.35    | 14.125  | 0.851861563 | 0.484    | 1.14   |
| 102576_at   | 47     | 48.5   | 66.1   | 61.1   | 62.1   | 54     | 38.7   | 82.8   | 0.734495671 | 55.675   | 59.4     | 3.725   | 0.937289562 | 0.8355   | -1.04  |
| 102577_at   | 73.3   | 96.7   | 71.1   | 99.3   | 88.5   | 118.9  | 84.4   | 84.4   | 0.455136747 | 85.1     | 94.05    | 8.95    | 0.904837852 | 0.436    | 1.106  |
| 102578_at   | 10.7   | 9.7    | 24.4   | 9.9    | 9.7    | 11.5   | 12.2   | 18     | 0.845999344 | 13.675   | 12.85    | 0.825   | 1.064202335 | 0.9751   | -1.008 |
| 102579_f_at | 4.1    | 8      | 3.6    | 6.9    | 10.3   | 3.1    | 4.8    | 4.8    | 0.959909568 | 5.65     | 5.75     | 0.1     | 0.982608696 | 0.9266   | -1.031 |



|             |        |         |         |         |         |         |        |         |             |          |           |          |             |            |        |
|-------------|--------|---------|---------|---------|---------|---------|--------|---------|-------------|----------|-----------|----------|-------------|------------|--------|
| 102580_r_at | 161.9  | 159.9   | 156     | 138.3   | 169.4   | 195.9   | 129.3  | 80.4    | 0.714332503 | 154.025  | 143.75    | 10.275   | 1.071478261 | 0.5682     | -1.128 |
| 102581_at   | 39.4   | 18.6    | 18.1    | 65.1    | 16.9    | 27.1    | 58.7   | 69.9    | 0.65689833  | 35.3     | 43.15     | 7.85     | 0.818076477 | 0.6839     | 1.215  |
| 102582_at   | 10.6   | 16      | 21      | 22.3    | 26.3    | 9.9     | 24.4   | 27.7    | 0.389957044 | 17.475   | 22.075    | 4.6      | 0.791619479 | 0.523      | 1.222  |
| 102583_at   | 13.8   | 22.9    | 36.1    | 5       | 42.3    | 25.8    | 23.6   | 32.8    | 0.197042738 | 19.45    | 31.125    | 11.675   | 0.624899598 | 0.1799     | 1.958  |
| 102584_at   | 185.7  | 154.3   | 177.6   | 181.9   | 121.4   | 146.9   | 202.2  | 145.5   | 0.322308331 | 174.875  | 154       | 20.875   | 1.135551948 | 0.26       | -1.152 |
| 102585_f_at | 160.8  | 137.1   | 134.9   | 162.1   | 124.5   | 150.6   | 166.6  | 169.3   | 0.762155583 | 148.725  | 152.75    | 4.025    | 0.973649755 | 0.7981     | -1.023 |
| 102586_at   | 19.3   | 16.9    | 21.1    | 14.2    | 19.3    | 15.5    | 16.1   | 19      | 0.831503779 | 17.875   | 17.475    | 0.4      | 1.022889843 | 0.882      | -1.016 |
| 102599_at   | 20434  | 22418.9 | 22009.3 | 18446.6 | 35613.9 | 18745.1 | 24612  | 21838.3 | 0.322754537 | 20827.2  | 25202.325 | 4375.125 | 0.826399945 | 0.297      | 1.179  |
| 102612_at   | 23.8   | 9.5     | 8.2     | 48.9    | 18.2    | 12.2    | 30.2   | 8.7     | 0.641460952 | 22.6     | 17.325    | 5.275    | 1.304473304 | 0.8319     | -1.116 |
| 102613_at   | 9.9    | 8.5     | 10.4    | 8.4     | 7.7     | 7.5     | 11.9   | 11.9    | 0.753976319 | 9.3      | 9.75      | 0.45     | 0.953846154 | 0.8542     | -1.027 |
| 102614_at   | 7.1    | 7.5     | 5.3     | 3.4     | 6.9     | 5.7     | 9.6    | 31.1    | 0.299760987 | 5.825    | 13.325    | 7.5      | 0.437148218 | 0.1891     | 1.867  |
| 102619_at   | 13.7   | 17.8    | 18.2    | 18.8    | 17.5    | 17.9    | 17.2   | 22.4    | 0.372765719 | 17.125   | 18.75     | 1.625    | 0.913333333 | 0.3762     | -1.096 |
| 102620_at   | 12.3   | 13.6    | 18.2    | 57.2    | 10.3    | 19.3    | 15.2   | 13.9    | 0.395340897 | 25.325   | 14.675    | 10.65    | 1.72572402  | 0.3796     | -1.428 |
| 102621_at   | 87.9   | 102.9   | 139.1   | 104.7   | 73.7    | 130.6   | 89.5   | 80.7    | 0.404331996 | 108.65   | 93.625    | 15.025   | 1.160480641 | 0.3505     | -1.173 |
| 102622_r_at | 4.7    | 8       | 33.4    | 10.8    | 23.6    | 12.3    | 35.9   | 11.3    | 0.480176807 | 14.225   | 20.775    | 6.55     | 0.684717208 | 0.3214     | 1.71   |
| 102623_at   | 31.5   | 44.2    | 46.4    | 36.9    | 29      | 76.4    | 20.5   | 40.3    | 0.895721275 | 39.75    | 41.55     | 1.8      | 0.9566787   | 0.8307     | -1.068 |
| 102624_at   | 298.6  | 332.6   | 320.1   | 336.7   | 420.7   | 436.4   | 436.8  | 628     | 0.046721613 | 322      | 480.475   | 158.475  | 0.670170144 | 0.007591   | 1.473  |
| 102625_f_at | 50     | 35.5    | 46.3    | 77.4    | 73.7    | 60.3    | 57.5   | 41.4    | 0.614489725 | 52.3     | 58.225    | 5.925    | 0.898239588 | 0.5524     | 1.135  |
| 102626_r_at | 95.3   | 73.9    | 80.6    | 175.4   | 136.9   | 97.5    | 104.3  | 100.5   | 0.896349284 | 106.3    | 109.8     | 3.5      | 0.968123862 | 0.6998     | -1.089 |
| 102627_at   | 176.4  | 301.5   | 254.3   | 265     | 152.3   | 205.6   | 149.1  | 275.7   | 0.225612592 | 249.3    | 195.675   | 53.625   | 1.274051361 | 0.2157     | -1.292 |
| 102628_at   | 96.5   | 114     | 104.6   | 90.5    | 189.4   | 112.1   | 156.7  | 146.3   | 0.046649805 | 101.4    | 151.125   | 49.725   | 0.670967742 | 0.01805    | 1.47   |
| 102629_at   | 56.3   | 13.6    | 21.6    | 21      | 31.9    | 36.6    | 19.8   | 22.3    | 0.965609343 | 28.125   | 27.65     | 0.475    | 1.017179024 | 0.7806     | -1.102 |
| 102630_s_at | 34     | 17.9    | 19.1    | 11.7    | 20.3    | 8       | 12.9   | 15.6    | 0.286816318 | 20.675   | 14.2      | 6.475    | 1.455985915 | 0.2704     | -1.428 |
| 102631_at   | 525.8  | 405     | 428.4   | 312.4   | 410.1   | 461.9   | 296.6  | 434.7   | 0.774642677 | 417.9    | 400.825   | 17.075   | 1.042599638 | 0.8006     | -1.039 |
| 102632_at   | 443.8  | 299.4   | 340.6   | 336.3   | 253.6   | 247.4   | 247    | 241     | 0.039658028 | 355.025  | 247.25    | 107.775  | 1.435894843 | 0.005746   | -1.421 |
| 102633_at   | 24.4   | 19.6    | 10.2    | 20.2    | 17.2    | 17.2    | 44.1   | 18.2    | 0.485412054 | 18.6     | 24.175    | 5.575    | 0.769389866 | 0.4921     | 1.244  |
| 102635_at   | 68.8   | 45.1    | 47.2    | 70.9    | 56.2    | 49.6    | 29.1   | 14.2    | 0.135159914 | 58       | 37.275    | 20.725   | 1.556002683 | 0.1523     | -1.734 |
| 102636_at   | 294.4  | 317.1   | 268.5   | 322.1   | 203.9   | 348.7   | 330.7  | 276.5   | 0.776755044 | 300.525  | 289.95    | 10.575   | 1.036471805 | 0.6868     | -1.056 |
| 102637_at   | 161    | 217.6   | 213.8   | 224.9   | 110.6   | 226.1   | 181.6  | 207.8   | 0.472514644 | 204.325  | 181.525   | 22.8     | 1.125602534 | 0.4455     | -1.156 |
| 102638_at   | 12.3   | 14.6    | 12.2    | 13.4    | 13.1    | 14.2    | 12.4   | 21.3    | 0.382419298 | 13.125   | 15.25     | 2.125    | 0.860655738 | 0.3604     | 1.137  |
| 102639_at   | 60.9   | 84.5    | 181.3   | 102.3   | 126.8   | 118.8   | 106.8  | 103.4   | 0.816560187 | 107.25   | 113.95    | 6.7      | 0.941202282 | 0.5744     | 1.149  |
| 102640_at   | 13.3   | 15.4    | 44.8    | 14.6    | 80.7    | 29.1    | 18.9   | 75.1    | 0.167897069 | 22.025   | 50.95     | 28.925   | 0.432286555 | 0.1306     | 2.228  |
| 102641_at   | 90.3   | 92.2    | 118.2   | 136.3   | 142.9   | 129.3   | 191.9  | 127     | 0.089659379 | 109.25   | 147.775   | 38.525   | 0.739299611 | 0.07072    | 1.354  |
| 102642_at   | 275.7  | 265.1   | 339     | 403.6   | 214.9   | 335.5   | 402.8  | 266     | 0.768638341 | 320.85   | 304.8     | 16.05    | 1.05265748  | 0.714      | -1.067 |
| 102643_at   | 110.1  | 80.2    | 108.1   | 112.4   | 103.6   | 93.7    | 116.8  | 110.6   | 0.715728502 | 102.7    | 106.175   | 3.475    | 0.967271015 | 0.6912     | -1.039 |
| 102644_at   | 674.7  | 805.6   | 658.2   | 870.8   | 795.7   | 1039    | 879.3  | 877.6   | 0.091011526 | 752.325  | 897.9     | 145.575  | 0.837871701 | 0.0872     | 1.196  |
| 102645_at   | 308.4  | 267.3   | 261     | 293     | 259.8   | 308     | 306.7  | 355.5   | 0.317545331 | 282.425  | 307.5     | 25.075   | 0.918455285 | 0.3202     | -1.085 |
| 102646_at   | 699.4  | 507.9   | 769.1   | 689.1   | 411.7   | 638.4   | 645.9  | 625.8   | 0.320144488 | 666.375  | 580.45    | 85.925   | 1.1480317   | 0.3509     | -1.154 |
| 102647_g_at | 1660.1 | 1574.8  | 1904.6  | 1727.4  | 1223.1  | 1596.5  | 1659.9 | 1986    | 0.588460041 | 1716.725 | 1616.375  | 100.35   | 1.062083366 | 0.5266     | -1.075 |
| 102648_at   | 5.8    | 7.2     | 9.9     | 18      | 81      | 9.9     | 29.1   | 22.7    | 0.20177158  | 10.225   | 35.675    | 25.45    | 0.286615277 | 0.07627    | 2.904  |
| 102649_s_at | 729.1  | 413.8   | 430.6   | 434.6   | 442.5   | 400.6   | 423.4  | 518.8   | 0.527959575 | 502.025  | 446.325   | 55.7     | 1.124796953 | 0.5471     | -1.097 |
| 102650_at   | 335.7  | 496     | 537.3   | 450.2   | 547.3   | 631     | 680.4  | 614.3   | 0.024196251 | 454.8    | 618.25    | 163.45   | 0.735624747 | 0.02944    | 1.376  |
| 102651_at   | 132    | 133.5   | 143     | 139.7   | 183.4   | 125.5   | 114.6  | 170.7   | 0.545286122 | 137.05   | 148.55    | 11.5     | 0.922584988 | 0.6165     | -1.063 |
| 102652_at   | 46.9   | 63.1    | 51.5    | 51.7    | 29.1    | 35.9    | 19.6   | 19      | 0.002294026 | 53.3     | 25.9      | 27.4     | 2.057915058 | 0.004088   | -2.121 |
| 102653_at   | 16.1   | 22.1    | 4.8     | 17.7    | 4.3     | 7.6     | 5      | 21.1    | 0.33288808  | 15.175   | 9.5       | 5.675    | 1.597368421 | 0.3136     | -1.723 |
| 102654_at   | 108.1  | 121     | 60.2    | 108.3   | 23.6    | 119.9   | 88.5   | 85.2    | 0.442537937 | 99.4     | 79.3      | 20.1     | 1.253467844 | 0.4132     | -1.414 |
| 102655_at   | 63.8   | 46.7    | 50.8    | 78.6    | 93.1    | 58.9    | 29.4   | 66.3    | 0.901624977 | 59.975   | 61.925    | 1.95     | 0.968510295 | 0.9229     | -1.027 |
| 102656_at   | 17.4   | 24.9    | 28.3    | 29.8    | 36.1    | 20      | 27.2   | 29.4    | 0.503962622 | 25.1     | 28.175    | 3.075    | 0.890860692 | 0.5273     | 1.123  |
| 102657_at   | 24.1   | 60.2    | 25.3    | 26.4    | 36.6    | 52.8    | 23.1   | 94.3    | 0.366722757 | 34       | 51.7      | 17.7     | 0.657640232 | 0.3586     | 1.443  |
| 102658_at   | 222    | 178.4   | 136.8   | 178.9   | 160.9   | 150.6   | 135.8  | 254     | 0.912011441 | 179.025  | 175.325   | 3.7      | 1.021103665 | 0.8349     | -1.038 |
| 102659_at   | 633    | 574.6   | 555.3   | 561.9   | 644.7   | 837.4   | 691.9  | 1452.5  | 0.179177808 | 581.2    | 906.625   | 325.425  | 0.641058872 | 0.08046    | 1.479  |
| 102660_at   | 65.5   | 88.4    | 76.6    | 86.4    | 57.9    | 88.7    | 100.6  | 132.8   | 0.393598644 | 79.225   | 95        | 15.775   | 0.833947368 | 0.4623     | 1.157  |
| 102661_at   | 284    | 304.3   | 291.7   | 313.1   | 79.4    | 91.1    | 96.3   | 115.5   | 1.12093E-06 | 298.275  | 95.575    | 202.7    | 3.120847502 | 0.00000746 | -3.148 |
| 102662_at   | 6.9    | 9.8     | 43.1    | 10.1    | 16.3    | 13.9    | 9.4    | 10.2    | 0.602462421 | 17.475   | 12.45     | 5.025    | 1.403614458 | 0.8671     | -1.077 |
| 102663_at   | 14.1   | 16.9    | 16.8    | 19.4    | 15.8    | 73      | 13.1   | 74      | 0.209328855 | 16.8     | 43.975    | 27.175   | 0.382035247 | 0.2118     | 1.947  |
| 102664_at   | 106.1  | 73      | 86.5    | 91.3    | 73.2    | 47.2    | 66.2   | 114.1   | 0.416583658 | 89.225   | 75.175    | 14.05    | 1.18689724  | 0.3226     | -1.237 |



|             |       |        |        |        |        |        |        |        |             |          |         |         |             |          |        |
|-------------|-------|--------|--------|--------|--------|--------|--------|--------|-------------|----------|---------|---------|-------------|----------|--------|
| 102665_at   | 89.2  | 92.1   | 114.2  | 131.9  | 151.1  | 103.8  | 95.3   | 136.8  | 0.4073024   | 106.85   | 121.75  | 14.9    | 0.87761807  | 0.4157   | 1.134  |
| 102666_at   | 24.8  | 22.2   | 6.1    | 37     | 15     | 11.8   | 19.2   | 53.4   | 0.848023433 | 22.525   | 24.85   | 2.325   | 0.906438632 | 0.8589   | -1.1   |
| 102667_at   | 22.4  | 58.7   | 29.9   | 48.9   | 25     | 56.5   | 37.3   | 58.3   | 0.723001039 | 39.975   | 44.275  | 4.3     | 0.902879729 | 0.7078   | 1.124  |
| 102668_at   | 104.4 | 145    | 111.5  | 140.2  | 129.7  | 137.8  | 168.8  | 171.7  | 0.119851942 | 125.275  | 152     | 26.725  | 0.824177632 | 0.1203   | 1.217  |
| 102669_at   | 6.4   | 5.4    | 19.3   | 21.9   | 15.5   | 15.4   | 5.4    | 4      | 0.572724746 | 13.25    | 10.075  | 3.175   | 1.315136476 | 0.6341   | -1.289 |
| 102670_at   | 668.9 | 636.2  | 694    | 517.2  | 715.7  | 646.2  | 604.9  | 495.9  | 0.831949163 | 629.075  | 615.675 | 13.4    | 1.02176473  | 0.8202   | -1.024 |
| 102671_at   | 106.6 | 98.1   | 145.6  | 119    | 138    | 68.9   | 53.9   | 108.1  | 0.303450736 | 117.325  | 92.225  | 25.1    | 1.272160477 | 0.2435   | -1.345 |
| 102672_g_at | 158.2 | 161.6  | 113.9  | 157.9  | 151.9  | 105.7  | 78.1   | 130.6  | 0.165648829 | 147.9    | 116.575 | 31.325  | 1.26871113  | 0.1732   | -1.294 |
| 102673_at   | 47    | 63     | 13.9   | 67.7   | 57.3   | 62.9   | 48.9   | 48.3   | 0.640999608 | 47.9     | 54.35   | 6.45    | 0.881324747 | 0.4825   | 1.322  |
| 102674_at   | 1.2   | 7.4    | 0.7    | 3.5    | 2.6    | 4      | 7.1    | 2.8    | 0.636619339 | 3.2      | 4.125   | 0.925   | 0.775757576 | 0.3632   | 1.776  |
| 102675_at   | 85.7  | 60.3   | 52.4   | 35.1   | 82     | 140.5  | 103.4  | 129.1  | 0.017718987 | 58.375   | 113.75  | 55.375  | 0.513186813 | 0.0197   | 2.006  |
| 102676_at   | 272.8 | 199.3  | 225.7  | 228.1  | 164.5  | 254.9  | 210.6  | 105.2  | 0.245774387 | 231.475  | 183.8   | 47.675  | 1.259385201 | 0.2209   | -1.317 |
| 102677_at   | 609.3 | 817.1  | 636.3  | 475.4  | 823.7  | 606    | 617.1  | 630.1  | 0.705862228 | 634.525  | 669.225 | 34.7    | 0.948148978 | 0.6493   | -1.065 |
| 102678_at   | 223.8 | 173.1  | 252.7  | 252.6  | 174.4  | 226.6  | 229.1  | 232.9  | 0.690103878 | 225.55   | 215.75  | 9.8     | 1.045422943 | 0.7349   | -1.041 |
| 102679_at   | 104.7 | 131.2  | 137.2  | 82.8   | 157.1  | 94.8   | 169.7  | 143.1  | 0.238855788 | 113.975  | 141.175 | 27.2    | 0.807331326 | 0.2733   | 1.234  |
| 102680_g_at | 92.1  | 83.2   | 114.8  | 43.8   | 40.3   | 92.2   | 90.9   | 110.6  | 0.999094622 | 83.475   | 83.5    | 0.025   | 0.999700599 | 0.9796   | -1.008 |
| 102681_at   | 76.2  | 74.5   | 91.6   | 128.7  | 64.7   | 101.9  | 107.1  | 38.3   | 0.501671621 | 92.75    | 78      | 14.75   | 1.189102564 | 0.4348   | -1.254 |
| 102682_at   | 62.1  | 119    | 83.2   | 108.8  | 120.8  | 96     | 102.8  | 150.1  | 0.21987067  | 93.275   | 117.425 | 24.15   | 0.794336811 | 0.2143   | 1.278  |
| 102683_at   | 932.8 | 1033.9 | 1055.6 | 1187.5 | 1171.1 | 1013   | 1217.4 | 1433.1 | 0.18437814  | 1052.45  | 1208.65 | 156.2   | 0.870764903 | 0.1726   | 1.144  |
| 102684_at   | 21    | 24.4   | 28.5   | 47.3   | 46.6   | 48.3   | 38     | 40.4   | 0.109753845 | 30.3     | 43.325  | 13.025  | 0.699365263 | 0.07262  | 1.495  |
| 102685_at   | 20.9  | 2.5    | 12     | 13     | 14.3   | 22.5   | 10.5   | 1.6    | 0.983362097 | 12.1     | 12.225  | 0.125   | 0.989775051 | 0.8928   | -1.111 |
| 102686_at   | 349.6 | 426.6  | 481    | 460.4  | 432.8  | 479.4  | 470.1  | 525.6  | 0.225443856 | 429.4    | 476.975 | 47.575  | 0.900256827 | 0.2243   | -1.116 |
| 102687_at   | 42.8  | 5.8    | 63.7   | 41.7   | 39     | 8.6    | 50.1   | 41.8   | 0.818334821 | 38.5     | 34.875  | 3.625   | 1.103942652 | 0.9821   | -1.016 |
| 102688_f_at | 30.1  | 8.6    | 13.3   | 13.7   | 4.6    | 8.5    | 5.7    | 10.1   | 0.143625183 | 16.425   | 7.225   | 9.2     | 2.273356401 | 0.05318  | -2.138 |
| 102689_at   | 219   | 388.1  | 391.9  | 303.6  | 274.5  | 354.8  | 317.3  | 327.2  | 0.878657889 | 325.65   | 318.45  | 7.2     | 1.022609515 | 0.9995   | -1     |
| 102690_at   | 28    | 18.9   | 17.8   | 30.6   | 14.6   | 22.3   | 29.3   | 32.1   | 0.887251051 | 23.825   | 24.575  | 0.75    | 0.96948118  | 0.9516   | -1.014 |
| 102691_at   | 331.9 | 296.1  | 423.8  | 318.1  | 414.5  | 374.7  | 419.9  | 491.9  | 0.06862743  | 342.475  | 425.25  | 82.775  | 0.805349794 | 0.06097  | 1.247  |
| 102692_s_at | 39.4  | 31.4   | 16     | 34.1   | 35.1   | 22     | 11.3   | 53.1   | 0.988989315 | 30.225   | 30.375  | 0.15    | 0.995061728 | 0.8161   | -1.098 |
| 102693_f_at | 17.7  | 25.7   | 26.1   | 27.3   | 34     | 16.1   | 16.3   | 15.8   | 0.502068316 | 24.2     | 20.55   | 3.65    | 1.177615572 | 0.3636   | -1.232 |
| 102694_at   | 0.8   | 8.3    | 23.1   | 1.1    | 5.3    | 1.3    | 7.7    | 1.5    | 0.472489529 | 8.325    | 3.95    | 4.375   | 2.107594937 | 0.8366   | -1.219 |
| 102695_at   | 122.3 | 102.8  | 93.9   | 49.3   | 128.4  | 87.9   | 96.3   | 99.7   | 0.564368204 | 92.075   | 103.075 | 11      | 0.893281591 | 0.4948   | 1.168  |
| 102696_s_at | 225.3 | 260.8  | 237.9  | 207.3  | 155.4  | 270    | 151.8  | 132.1  | 0.17512947  | 232.825  | 177.325 | 55.5    | 1.312984633 | 0.11     | -1.362 |
| 102697_at   | 477.9 | 497.3  | 529.5  | 472.4  | 459.9  | 373.6  | 401    | 394.6  | 0.010406349 | 494.275  | 407.275 | 87      | 1.213614879 | 0.008691 | -1.216 |
| 102698_at   | 88.3  | 69.4   | 83.7   | 77     | 97.2   | 109.5  | 78.9   | 78.4   | 0.246924057 | 79.6     | 91      | 11.4    | 0.874725275 | 0.2391   | 1.136  |
| 102699_at   | 17.6  | 39.9   | 46.6   | 53.2   | 61.1   | 48.5   | 52     | 58.3   | 0.134208814 | 39.325   | 54.975  | 15.65   | 0.715325148 | 0.1569   | 1.507  |
| 102700_at   | 13.4  | 6.9    | 7.4    | 3.8    | 5.2    | 5.1    | 2.3    | 19.2   | 0.986841154 | 7.875    | 7.95    | 0.075   | 0.990566038 | 0.7024   | -1.227 |
| 102701_at   | 17.8  | 58.8   | 69     | 41.5   | 93     | 35.3   | 39     | 67     | 0.526696396 | 46.775   | 58.575  | 11.8    | 0.798548869 | 0.5139   | 1.3    |
| 102702_at   | 85    | 160.1  | 144.5  | 158.7  | 154.4  | 107.9  | 198.2  | 145    | 0.597441261 | 137.075  | 151.375 | 14.3    | 0.905532618 | 0.6043   | 1.113  |
| 102703_s_at | 3     | 7.7    | 6.3    | 5.1    | 8.6    | 13.8   | 3.6    | 2.5    | 0.596174329 | 5.525    | 7.125   | 1.6     | 0.775438596 | 0.8646   | -1.082 |
| 102704_at   | 23.2  | 17.8   | 17.2   | 11.9   | 9.5    | 13.7   | 20.1   | 34.7   | 0.757673919 | 17.525   | 19.5    | 1.975   | 0.898717949 | 0.9543   | -1.019 |
| 102705_at   | 1.8   | 3.2    | 2.6    | 1.8    | 2.6    | 2.2    | 1.7    | 3.8    | 0.703992099 | 2.35     | 2.575   | 0.225   | 0.912621359 | 0.7186   | -1.087 |
| 102706_i_at | 36.2  | 26.7   | 24.4   | 22.8   | 4.9    | 30.9   | 44.3   | 23     | 0.851939234 | 27.525   | 25.775  | 1.75    | 1.067895247 | 0.5547   | -1.361 |
| 102707_f_at | 249.8 | 179.2  | 232.4  | 215.5  | 215.6  | 253.8  | 235.7  | 281.3  | 0.231147914 | 219.225  | 246.6   | 27.375  | 0.888990268 | 0.2336   | 1.128  |
| 102708_at   | 76.6  | 24.9   | 18.1   | 15.3   | 40.2   | 25.2   | 67     | 40.5   | 0.59757245  | 33.725   | 43.225  | 9.5     | 0.78021978  | 0.3583   | 1.51   |
| 102709_at   | 11.7  | 31.7   | 31.1   | 39.8   | 29.8   | 31.7   | 50.7   | 6.9    | 0.915435551 | 28.575   | 29.775  | 1.2     | 0.959697733 | 0.8812   | -1.083 |
| 102710_at   | 60.7  | 89.8   | 64.1   | 78.4   | 103.4  | 95.2   | 104.5  | 94.3   | 0.023290898 | 73.25    | 99.35   | 26.1    | 0.737292401 | 0.01566  | 1.371  |
| 102711_at   | 202.2 | 190.4  | 225    | 258.1  | 186.8  | 206.9  | 166.8  | 266.8  | 0.662970801 | 218.925  | 206.825 | 12.1    | 1.058503566 | 0.6045   | -1.068 |
| 102712_at   | 9.1   | 9.1    | 33     | 30.6   | 34     | 7.4    | 14.2   | 56     | 0.584991188 | 20.45    | 27.9    | 7.45    | 0.73297491  | 0.7185   | 1.244  |
| 102713_at   | 950.3 | 1439.8 | 1009.1 | 1562.3 | 656.4  | 1355.9 | 901.3  | 1180.6 | 0.356608943 | 1240.375 | 1023.55 | 216.825 | 1.211836256 | 0.3497   | -1.229 |
| 102714_at   | 146   | 141.5  | 154.1  | 96.5   | 130.3  | 139.1  | 74.8   | 169.6  | 0.806988751 | 134.525  | 128.45  | 6.075   | 1.047294667 | 0.7363   | -1.075 |
| 102715_at   | 71.9  | 83.5   | 50     | 88.2   | 68.2   | 81.5   | 76.6   | 133.8  | 0.37797355  | 73.4     | 90.025  | 16.625  | 0.815329075 | 0.3663   | 1.211  |
| 102716_at   | 230.2 | 104.2  | 153    | 99.9   | 25.5   | 108.6  | 41.2   | 51.9   | 0.052139148 | 146.825  | 56.8    | 90.025  | 2.584947183 | 0.02837  | -2.804 |
| 102717_at   | 6.1   | 3.6    | 7.2    | 9.7    | 12.2   | 10.5   | 17     | 10.4   | 0.027203512 | 6.65     | 12.525  | 5.875   | 0.530938124 | 0.03051  | 1.967  |
| 102718_at   | 13.7  | 6      | 12.9   | 11.4   | 14.7   | 16.8   | 13.1   | 13.2   | 0.142882279 | 11       | 14.45   | 3.45    | 0.761245675 | 0.1631   | 1.371  |
| 102719_f_at | 6.9   | 2.7    | 1.6    | 5.6    | 2.3    | 1.1    | 6.4    | 3.5    | 0.620646246 | 4.2      | 3.325   | 0.875   | 1.263157895 | 0.6214   | -1.294 |
| 102720_at   | 120.8 | 119    | 135.9  | 122.4  | 124.9  | 135.7  | 126.5  | 151.2  | 0.218152619 | 124.525  | 134.575 | 10.05   | 0.925320453 | 0.202    | -1.079 |



|             |        |        |        |        |       |        |        |        |             |          |          |         |             |          |        |
|-------------|--------|--------|--------|--------|-------|--------|--------|--------|-------------|----------|----------|---------|-------------|----------|--------|
| 102721_at   | 114.3  | 106.8  | 94.9   | 88.6   | 42.6  | 61.8   | 66.7   | 124.7  | 0.224724225 | 101.15   | 73.95    | 27.2    | 1.367816092 | 0.1443   | -1.471 |
| 102722_g_at | 9.5    | 9.4    | 18     | 9.7    | 18.9  | 2.9    | 18.4   | 22.3   | 0.452251413 | 11.65    | 15.625   | 3.975   | 0.7456      | 0.8674   | -1.093 |
| 102723_at   | 4.3    | 4.7    | 4.9    | 4.9    | 3.7   | 4.5    | 6.3    | 3      | 0.682277375 | 4.7      | 4.375    | 0.325   | 1.074285714 | 0.5244   | -1.115 |
| 102724_at   | 141.8  | 103.6  | 98.4   | 145.3  | 115.7 | 110.1  | 115    | 165.1  | 0.822151186 | 122.275  | 126.475  | 4.2     | 0.966791856 | 0.8082   | -1.036 |
| 102725_at   | 46     | 13.3   | 19.9   | 28.4   | 11.3  | 60.5   | 38.5   | 6.4    | 0.881451831 | 26.9     | 29.175   | 2.275   | 0.922022279 | 0.7691   | -1.196 |
| 102726_at   | 25.7   | 20.2   | 19.3   | 21.2   | 37.8  | 38.8   | 33.4   | 25.4   | 0.019845377 | 21.6     | 33.85    | 12.25   | 0.638109306 | 0.0088   | 1.554  |
| 102727_at   | 150.8  | 145.8  | 130.3  | 101    | 198.1 | 131.3  | 97.9   | 190.8  | 0.441213973 | 131.975  | 154.525  | 22.55   | 0.854068921 | 0.5203   | 1.138  |
| 102728_f_at | 7.8    | 3.6    | 9.1    | 5.7    | 9.7   | 9.5    | 10.6   | 10.5   | 0.058067433 | 6.55     | 10.075   | 3.525   | 0.650124069 | 0.0539   | 1.628  |
| 102729_f_at | 7.9    | 11.6   | 23.8   | 18.5   | 22.4  | 13.3   | 14.9   | 5.5    | 0.783460075 | 15.45    | 14.025   | 1.425   | 1.101604278 | 0.7536   | -1.134 |
| 102730_at   | 39     | 8      | 12.1   | 14.1   | 35.8  | 18.5   | 18.7   | 10.9   | 0.771470607 | 18.3     | 20.975   | 2.675   | 0.872467223 | 0.5991   | 1.258  |
| 102731_g_at | 200.9  | 229.7  | 250.8  | 203.3  | 273.5 | 215.8  | 296.5  | 295.3  | 0.078612316 | 221.175  | 270.275  | 49.1    | 0.818333179 | 0.07531  | 1.217  |
| 102732_at   | 204.1  | 275.7  | 186.6  | 233.3  | 203.5 | 290.8  | 188.8  | 162.1  | 0.703939644 | 224.925  | 211.3    | 13.625  | 1.064481779 | 0.6324   | -1.079 |
| 102733_at   | 3.5    | 10.8   | 6.3    | 5.9    | 8.5   | 8.3    | 8.9    | 7.9    | 0.329059498 | 6.625    | 8.4      | 1.775   | 0.788690476 | 0.2251   | 1.366  |
| 102734_at   | 1452.3 | 1096.1 | 1326.4 | 1280.1 | 957.5 | 1392.6 | 1326.5 | 1287.8 | 0.710368097 | 1288.725 | 1241.1   | 47.625  | 1.038373217 | 0.6921   | -1.044 |
| 102735_at   | 2.8    | 3.8    | 3.3    | 4.3    | 3.8   | 3.7    | 2.6    | 3.4    | 0.69322055  | 3.55     | 3.375    | 0.175   | 1.051851852 | 0.7218   | -1.047 |
| 102736_at   | 40.2   | 23.7   | 15.2   | 39.8   | 53.5  | 53.7   | 59.5   | 32.7   | 0.056518303 | 29.725   | 49.85    | 20.125  | 0.596288867 | 0.07967  | 1.765  |
| 102737_at   | 329.8  | 271.5  | 311    | 390.7  | 107.5 | 158.6  | 146.5  | 137.7  | 0.002036136 | 325.75   | 137.575  | 188.175 | 2.367799382 | 0.000262 | -2.371 |
| 102738_s_at | 363.4  | 210.2  | 283    | 320.8  | 116.5 | 192    | 142.4  | 236.8  | 0.028144032 | 294.35   | 171.925  | 122.425 | 1.712083757 | 0.03005  | -1.741 |
| 102739_s_at | 8.3    | 5      | 7.9    | 6      | 13.6  | 5.1    | 14.2   | 6.3    | 0.303707344 | 6.8      | 9.8      | 3       | 0.693877551 | 0.3514   | 1.336  |
| 102740_at   | 69.5   | 57     | 77.3   | 69.6   | 51.5  | 89     | 71     | 69.7   | 0.832827031 | 68.35    | 70.3     | 1.95    | 0.972261735 | 0.9104   | -1.015 |
| 102741_at   | 16.1   | 75.2   | 21     | 81.1   | 47.3  | 46.9   | 24.7   | 36.1   | 0.626845027 | 48.35    | 38.75    | 9.6     | 1.247741935 | 0.9823   | -1.01  |
| 102742_g_at | 69.7   | 86.4   | 56.1   | 62.3   | 85.2  | 68.9   | 69.2   | 92.8   | 0.2850607   | 68.625   | 79.025   | 10.4    | 0.868396077 | 0.2674   | 1.157  |
| 102743_at   | 106.5  | 28.1   | 172.4  | 113.9  | 162.8 | 128.2  | 146    | 98.8   | 0.426052189 | 105.225  | 133.95   | 28.725  | 0.785554311 | 0.3556   | 1.504  |
| 102744_at   | 6.7    | 6.5    | 3.7    | 6.4    | 6.9   | 3.6    | 4.9    | 9.3    | 0.817094707 | 5.825    | 6.175    | 0.35    | 0.943319838 | 0.9228   | -1.026 |
| 102745_at   | 51.5   | 48.8   | 39     | 20.6   | 56.5  | 38.9   | 47.3   | 48.1   | 0.375980869 | 39.975   | 47.7     | 7.725   | 0.838050314 | 0.3498   | 1.255  |
| 102746_at   | 22.5   | 26.7   | 28.8   | 22.2   | 33.2  | 14.2   | 38.1   | 26.2   | 0.627744865 | 25.05    | 27.925   | 2.875   | 0.897045658 | 0.8315   | -1.052 |
| 102747_at   | 69.6   | 92.8   | 55.1   | 29.8   | 50.3  | 15.2   | 34.9   | 112.8  | 0.745734124 | 61.825   | 53.3     | 8.525   | 1.159943715 | 0.5373   | -1.369 |
| 102748_at   | 28.7   | 3.7    | 5.5    | 10.7   | 15.1  | 28     | 18     | 6.5    | 0.537062526 | 12.15    | 16.9     | 4.75    | 0.718934911 | 0.3803   | 1.671  |
| 102749_at   | 97     | 76.5   | 93.1   | 89.3   | 119.9 | 48     | 70.4   | 93.8   | 0.732533482 | 88.975   | 83.025   | 5.95    | 1.071665161 | 0.5747   | -1.128 |
| 102750_at   | 583.5  | 626.7  | 508.6  | 552.3  | 592.7 | 572.3  | 533.8  | 527.2  | 0.717265235 | 567.775  | 556.5    | 11.275  | 1.020260557 | 0.7369   | -1.019 |
| 102751_at   | 438.5  | 542.3  | 435.4  | 598.6  | 433.7 | 524.9  | 583    | 667.7  | 0.474411333 | 503.7    | 552.325  | 48.625  | 0.911963065 | 0.487    | -1.093 |
| 102752_at   | 1950   | 1601.5 | 1510.7 | 1949.8 | 1366  | 1668.4 | 1546.5 | 1522.9 | 0.148219423 | 1753     | 1525.95  | 227.05  | 1.148792555 | 0.1354   | -1.144 |
| 102753_at   | 124.1  | 281.6  | 293.5  | 226.2  | 306.9 | 239.9  | 298.8  | 228.9  | 0.434694739 | 231.35   | 268.625  | 37.275  | 0.861237785 | 0.3962   | 1.214  |
| 102754_at   | 416.4  | 448.6  | 417.6  | 400.8  | 548   | 487.8  | 493.2  | 525.1  | 0.002415477 | 420.85   | 513.525  | 92.675  | 0.819531668 | 0.001499 | 1.22   |
| 102755_at   | 134.8  | 146    | 149    | 105.3  | 208.5 | 153.2  | 117.7  | 183.2  | 0.213313476 | 133.775  | 165.65   | 31.875  | 0.807576215 | 0.2221   | 1.222  |
| 102758_at   | 243.6  | 206.6  | 175.9  | 180.2  | 158.7 | 181.3  | 207.9  | 176.5  | 0.319452864 | 201.575  | 181.1    | 20.475  | 1.113059083 | 0.3105   | -1.109 |
| 102759_at   | 211.3  | 279.1  | 325    | 156.5  | 343.5 | 304    | 248.7  | 209.3  | 0.509345269 | 242.975  | 276.375  | 33.4    | 0.879149706 | 0.474    | 1.16   |
| 102761_at   | 527.4  | 461.8  | 456.5  | 501.2  | 345.7 | 462.5  | 387.5  | 431.1  | 0.045376199 | 486.725  | 406.7    | 80.025  | 1.196766658 | 0.04392  | -1.202 |
| 102762_r_at | 55.7   | 52.3   | 90.2   | 63.1   | 49.8  | 73     | 74.3   | 87.4   | 0.635495988 | 65.325   | 71.125   | 5.8     | 0.918453427 | 0.6251   | -1.092 |
| 102763_at   | 4.4    | 7.3    | 6.7    | 4.4    | 10.2  | 6.4    | 2.8    | 8.2    | 0.526930334 | 5.7      | 6.9      | 1.2     | 0.826086957 | 0.7286   | 1.12   |
| 102764_at   | 445.1  | 345.4  | 451    | 336.5  | 326.5 | 477.3  | 394.9  | 324.1  | 0.781907982 | 394.5    | 380.7    | 13.8    | 1.036249015 | 0.7569   | -1.04  |
| 102765_at   | 510.2  | 451.1  | 546.7  | 537.9  | 465.2 | 477    | 572.2  | 477.5  | 0.696524787 | 511.475  | 497.975  | 13.5    | 1.027109795 | 0.6858   | -1.028 |
| 102766_at   | 38.3   | 42.4   | 49.4   | 24.6   | 39.2  | 27.8   | 7.5    | 50.7   | 0.51860098  | 38.675   | 31.3     | 7.375   | 1.235623003 | 0.4205   | -1.476 |
| 102767_at   | 2429.1 | 2187.9 | 2264   | 2541.3 | 1278  | 1691.5 | 1660.3 | 1599.6 | 0.000750615 | 2355.575 | 1557.35  | 798.225 | 1.512553376 | 0.001246 | -1.519 |
| 102768_i_at | 101.5  | 78.5   | 85.4   | 139    | 102.7 | 103.6  | 94.5   | 210.3  | 0.430378473 | 101.1    | 127.775  | 26.675  | 0.791234592 | 0.4061   | 1.223  |
| 102769_f_at | 138.6  | 108.4  | 95.8   | 115.3  | 120.9 | 162    | 117.6  | 218.4  | 0.187974947 | 114.525  | 154.725  | 40.2    | 0.740184198 | 0.1427   | 1.319  |
| 102770_at   | 136.4  | 87.3   | 88.1   | 105.3  | 172.1 | 152.2  | 132.9  | 165.7  | 0.0132311   | 104.275  | 155.725  | 51.45   | 0.669609889 | 0.01339  | 1.512  |
| 102771_at   | 720    | 1049.6 | 736.5  | 973.2  | 835.7 | 919.3  | 1189.5 | 1109   | 0.265221343 | 869.825  | 1013.375 | 143.55  | 0.85834464  | 0.2606   | 1.169  |
| 102772_at   | 549.2  | 987.1  | 793.8  | 836.6  | 881.7 | 948.2  | 1033.1 | 964.6  | 0.166279193 | 791.675  | 956.9    | 165.225 | 0.827333055 | 0.1521   | 1.233  |
| 102773_at   | 11.3   | 28.2   | 19     | 22.4   | 14.5  | 36.1   | 16.6   | 23.7   | 0.693604586 | 20.225   | 22.725   | 2.5     | 0.889988999 | 0.7194   | 1.112  |
| 102774_at   | 13.5   | 9.1    | 5.7    | 8.3    | 20.8  | 28.9   | 13.6   | 44     | 0.069425365 | 9.15     | 26.825   | 17.675  | 0.34109972  | 0.01467  | 2.814  |
| 102776_at   | 450.3  | 454    | 478.2  | 455.4  | 362.3 | 424.8  | 480.6  | 516.9  | 0.72239027  | 459.475  | 446.15   | 13.325  | 1.029866637 | 0.6474   | -1.039 |
| 102777_at   | 11     | 11.8   | 23.1   | 18.1   | 16.5  | 29.4   | 25.1   | 19.7   | 0.149305671 | 16       | 22.675   | 6.675   | 0.705622933 | 0.139    | 1.451  |
| 102778_at   | 138.4  | 80.4   | 119.4  | 78.4   | 84.3  | 26.7   | 114.4  | 107.1  | 0.431325249 | 104.15   | 83.125   | 21.025  | 1.252932331 | 0.4009   | -1.395 |
| 102779_at   | 244.8  | 239.1  | 299.9  | 140.7  | 298.6 | 260.3  | 349.4  | 153.7  | 0.54239526  | 231.125  | 265.5    | 34.375  | 0.870527307 | 0.6056   | 1.14   |
| 102780_at   | 84.4   | 78.4   | 56.5   | 76.9   | 25.1  | 65.4   | 84.7   | 73.5   | 0.451142093 | 74.05    | 62.175   | 11.875  | 1.190993164 | 0.4067   | -1.295 |



|             |        |        |        |        |        |        |        |        |             |          |          |         |             |          |        |
|-------------|--------|--------|--------|--------|--------|--------|--------|--------|-------------|----------|----------|---------|-------------|----------|--------|
| 102781_at   | 565.6  | 1093.6 | 977.2  | 1056.6 | 890.8  | 1226.7 | 1231.9 | 1495.8 | 0.14829035  | 923.25   | 1211.3   | 288.05  | 0.762197639 | 0.1778   | 1.332  |
| 102782_at   | 332.6  | 257.2  | 306.4  | 292    | 299.2  | 322.3  | 308.7  | 260.8  | 0.973930612 | 297.05   | 297.75   | 0.7     | 0.997649034 | 0.9614   | -1.004 |
| 102783_at   | 528.9  | 328.4  | 458.9  | 514.6  | 357.7  | 409.6  | 464.1  | 533.4  | 0.790071586 | 457.7    | 441.2    | 16.5    | 1.037398005 | 0.8317   | -1.031 |
| 102784_at   | 148.4  | 155.5  | 213.8  | 193.2  | 167.6  | 191.7  | 198.4  | 183.5  | 0.676716576 | 177.725  | 185.3    | 7.575   | 0.959120345 | 0.6079   | -1.052 |
| 102785_at   | 3.8    | 12.9   | 3.3    | 4.7    | 9      | 5      | 17.7   | 7.5    | 0.350176968 | 6.175    | 9.8      | 3.625   | 0.630102041 | 0.2485   | 1.674  |
| 102786_at   | 1416.7 | 1245.9 | 1062.5 | 1262.6 | 1312.4 | 1388.4 | 1330.6 | 1291.3 | 0.337473236 | 1246.925 | 1330.675 | 83.75   | 0.937062017 | 0.2971   | -1.072 |
| 102787_at   | 994.8  | 1771.5 | 1277.8 | 1605.1 | 1282.5 | 1938.1 | 2110.7 | 1626.9 | 0.240589521 | 1412.3   | 1739.55  | 327.25  | 0.811876635 | 0.2513   | 1.24   |
| 102788_s_at | 4.2    | 7.6    | 3.6    | 4.1    | 7.3    | 4.7    | 6.1    | 5      | 0.446291918 | 4.875    | 5.775    | 0.9     | 0.844155844 | 0.3472   | 1.219  |
| 102789_at   | 185    | 255.9  | 197.2  | 211.8  | 202.7  | 207.3  | 240.2  | 247.9  | 0.555998145 | 212.475  | 224.525  | 12.05   | 0.946331144 | 0.5224   | -1.061 |
| 102790_at   | 3553.3 | 2939.6 | 3831.7 | 3384   | 2727.8 | 3176.5 | 3237.9 | 3256.6 | 0.202606449 | 3427.15  | 3099.7   | 327.45  | 1.105639255 | 0.2088   | -1.103 |
| 102791_at   | 133.7  | 96.2   | 149.4  | 152.5  | 211.2  | 191.3  | 214.9  | 193.4  | 0.006931767 | 132.95   | 202.7    | 69.75   | 0.655895412 | 0.007608 | 1.547  |
| 102792_at   | 763.1  | 1041.9 | 1098.9 | 1237.5 | 697.4  | 970.7  | 962.6  | 833.2  | 0.211216935 | 1035.35  | 865.975  | 169.375 | 1.195588787 | 0.2305   | -1.188 |
| 102793_at   | 21.4   | 33.9   | 17.3   | 44.2   | 34.1   | 28.3   | 20.7   | 39.1   | 0.860135002 | 29.2     | 30.55    | 1.35    | 0.955810147 | 0.7481   | -1.089 |
| 102794_at   | 57.9   | 73.8   | 58.6   | 62     | 107.8  | 75     | 74.5   | 87.1   | 0.052071026 | 63.075   | 86.1     | 23.025  | 0.732578397 | 0.02591  | 1.355  |
| 102795_at   | 59.9   | 25.2   | 62.2   | 54.3   | 28.6   | 21.7   | 54.1   | 43.9   | 0.282841701 | 50.4     | 37.075   | 13.325  | 1.359406608 | 0.336    | -1.364 |
| 102796_at   | 405    | 256.7  | 389.9  | 513.1  | 370.4  | 580.2  | 292.5  | 472.1  | 0.661479933 | 391.175  | 428.8    | 37.625  | 0.912255131 | 0.6822   | -1.093 |
| 102797_at   | 295.2  | 301.1  | 329.5  | 298.4  | 344.8  | 299.8  | 433.7  | 394.4  | 0.120257891 | 306.05   | 368.175  | 62.125  | 0.831262307 | 0.08182  | 1.193  |
| 102798_at   | 73.1   | 82.7   | 74.3   | 62.9   | 103.1  | 89.2   | 83.5   | 68.1   | 0.189334839 | 73.25    | 85.975   | 12.725  | 0.851991858 | 0.1848   | 1.167  |
| 102799_at   | 5.7    | 16.1   | 13.8   | 19.7   | 16     | 25.3   | 3.4    | 22.1   | 0.633945232 | 13.825   | 16.7     | 2.875   | 0.827844311 | 0.9308   | -1.05  |
| 102800_at   | 80.1   | 154.4  | 113.2  | 184.4  | 22     | 72.2   | 26.4   | 57.3   | 0.021831401 | 133.025  | 44.475   | 88.55   | 2.991006183 | 0.01435  | -3.221 |
| 102801_at   | 39.5   | 21.5   | 2.8    | 7.2    | 8.8    | 9.2    | 11.2   | 13     | 0.44956286  | 17.75    | 10.55    | 7.2     | 1.682464455 | 0.876    | -1.101 |
| 102802_at   | 38.2   | 34.3   | 42     | 43.3   | 107.4  | 52.4   | 59.9   | 51.2   | 0.123559085 | 39.45    | 67.725   | 28.275  | 0.582502769 | 0.03435  | 1.64   |
| 102803_at   | 318    | 285.4  | 317.3  | 344.1  | 203.3  | 295.7  | 224.8  | 226.8  | 0.020738854 | 316.2    | 237.65   | 78.55   | 1.330528088 | 0.01635  | -1.341 |
| 102804_at   | 388.9  | 322.9  | 481.9  | 457.3  | 438.5  | 410.8  | 460.5  | 440.4  | 0.547117318 | 412.75   | 437.55   | 24.8    | 0.943320763 | 0.485    | -1.072 |
| 102805_at   | 28     | 55.2   | 20.3   | 55.6   | 22.6   | 55.6   | 56.3   | 86.2   | 0.374019827 | 39.775   | 55.175   | 15.4    | 0.720888083 | 0.4388   | 1.368  |
| 102806_g_at | 6.7    | 8.2    | 5.1    | 6.9    | 8.6    | 27.6   | 10.9   | 3.8    | 0.330958034 | 6.725    | 12.725   | 6       | 0.52848723  | 0.3677   | 1.505  |
| 102807_at   | 1019   | 934    | 1129   | 1046.1 | 681.2  | 799.9  | 791.9  | 764.9  | 0.002088809 | 1032.025 | 759.475  | 272.55  | 1.358866322 | 0.001259 | -1.359 |
| 102808_at   | 48.1   | 58.2   | 25.5   | 22.8   | 10.3   | 59.8   | 34.8   | 42.1   | 0.892122512 | 38.65    | 36.75    | 1.9     | 1.05170068  | 0.7548   | -1.157 |
| 102809_s_at | 125.3  | 121.2  | 110.4  | 101.7  | 192.9  | 118.7  | 118    | 145.2  | 0.197888299 | 114.65   | 143.7    | 29.05   | 0.797842728 | 0.1465   | 1.232  |
| 102811_at   | 730.2  | 766    | 631.8  | 700    | 848.2  | 899.2  | 913.7  | 834.6  | 0.004034209 | 707      | 873.925  | 166.925 | 0.808993907 | 0.003717 | 1.238  |
| 102812_i_at | 662.2  | 574.5  | 625.8  | 628.7  | 730.1  | 657.8  | 709.8  | 645.9  | 0.059622684 | 622.8    | 685.9    | 63.1    | 0.908004082 | 0.05961  | -1.101 |
| 102813_f_at | 480.1  | 433.5  | 490.9  | 390.5  | 523.4  | 525.7  | 479.8  | 494    | 0.085175156 | 448.75   | 505.725  | 56.975  | 0.887339957 | 0.07486  | 1.131  |
| 102814_f_at | 9.3    | 6.1    | 55.7   | 30     | 23.4   | 9.7    | 5.4    | 13.3   | 0.369708073 | 25.275   | 12.95    | 12.325  | 1.951737452 | 0.4856   | -1.558 |
| 102815_at   | 740.7  | 1528.9 | 1084.4 | 1353.8 | 930.5  | 1368.8 | 1378   | 1351.9 | 0.708943865 | 1176.95  | 1257.3   | 80.35   | 0.936093216 | 0.6495   | -1.093 |
| 102816_at   | 15.3   | 24.1   | 8.7    | 18     | 7.3    | 15.9   | 20.8   | 18.2   | 0.829398602 | 16.525   | 15.55    | 0.975   | 1.062700965 | 0.8388   | -1.07  |
| 102817_at   | 184.4  | 166.6  | 178    | 196.9  | 262    | 226.7  | 242.9  | 267.7  | 0.001477378 | 181.475  | 249.825  | 68.35   | 0.726408486 | 0.000814 | 1.376  |
| 102818_at   | 522.2  | 460.4  | 560.4  | 301.2  | 520.4  | 688.2  | 451.5  | 627    | 0.205442804 | 461.05   | 571.775  | 110.725 | 0.806348651 | 0.2219   | 1.257  |
| 102819_at   | 66.3   | 31.7   | 38.9   | 8.1    | 6.1    | 38.3   | 43.2   | 35.2   | 0.718680721 | 36.25    | 30.7     | 5.55    | 1.180781759 | 0.82     | -1.165 |
| 102820_at   | 4.5    | 12.3   | 6.8    | 10.8   | 9.7    | 8.1    | 8.3    | 19.4   | 0.429302894 | 8.6      | 11.375   | 2.775   | 0.756043956 | 0.3959   | 1.326  |
| 102821_s_at | 9468.4 | 8963.5 | 9756.5 | 8096.2 | 10527  | 7767.2 | 9299.9 | 7135.2 | 0.668408343 | 9071.15  | 8682.325 | 388.825 | 1.044783511 | 0.6042   | -1.054 |
| 102822_at   | 17.3   | 6.8    | 14.4   | 14.4   | 22.8   | 3.4    | 18.3   | 25.7   | 0.46943022  | 13.225   | 17.55    | 4.325   | 0.753561254 | 0.8561   | 1.103  |
| 102823_at   | 6.4    | 8.8    | 12     | 9.4    | 11.2   | 9.1    | 8.3    | 6.7    | 0.834045601 | 9.15     | 8.825    | 0.325   | 1.036827195 | 0.8742   | -1.028 |
| 102824_g_at | 3      | 12.1   | 33.7   | 16.1   | 12.1   | 2.8    | 7.1    | 14.8   | 0.370360806 | 16.225   | 9.2      | 7.025   | 1.763586957 | 0.5266   | -1.526 |
| 102825_at   | 18     | 13.9   | 24.8   | 9.7    | 36.6   | 35.9   | 16.2   | 7.3    | 0.40481799  | 16.6     | 24       | 7.4     | 0.691666667 | 0.6011   | 1.269  |
| 102826_at   | 802.3  | 616.1  | 568    | 560.7  | 629.7  | 548.4  | 580.1  | 454.2  | 0.26868163  | 636.775  | 553.1    | 83.675  | 1.151283674 | 0.253    | -1.147 |
| 102827_at   | 967.2  | 1059   | 1104   | 1320.2 | 1279.1 | 1415.1 | 1481.4 | 1344.2 | 0.028558959 | 1112.6   | 1379.95  | 267.35  | 0.806261096 | 0.02303  | 1.246  |
| 102828_at   | 168.4  | 198    | 166.6  | 154.4  | 188.9  | 147    | 193.8  | 244.8  | 0.376823425 | 171.85   | 193.625  | 21.775  | 0.887540349 | 0.3929   | 1.113  |
| 102829_s_at | 164.3  | 121.9  | 135.4  | 132.7  | 95.9   | 181.2  | 119.8  | 142.7  | 0.864270093 | 138.575  | 134.9    | 3.675   | 1.027242402 | 0.7582   | -1.049 |
| 102830_at   | 5.6    | 5.3    | 7.4    | 28.6   | 4.8    | 5.9    | 6.1    | 5.6    | 0.35740887  | 11.725   | 5.6      | 6.125   | 2.09375     | 0.2859   | -1.597 |
| 102831_s_at | 71.1   | 67.4   | 73.2   | 23.1   | 41.8   | 90.5   | 63.6   | 14.5   | 0.77227502  | 58.7     | 52.6     | 6.1     | 1.115969582 | 0.6804   | -1.233 |
| 102832_at   | 58.6   | 106.5  | 92.2   | 108.2  | 95.5   | 116.7  | 89.5   | 106.5  | 0.451920225 | 91.375   | 102.05   | 10.675  | 0.895394415 | 0.4194   | 1.144  |
| 102833_at   | 321.5  | 429.3  | 279.5  | 462.2  | 165.3  | 371.7  | 289.4  | 352.7  | 0.264504645 | 373.125  | 294.775  | 78.35   | 1.265795946 | 0.2802   | -1.299 |
| 102834_at   | 52.2   | 20     | 37.5   | 11.3   | 44     | 47.3   | 13.3   | 10.6   | 0.917155169 | 30.25    | 28.8     | 1.45    | 1.050347222 | 0.847    | -1.11  |
| 102835_at   | 578.4  | 586.8  | 522.8  | 549    | 559.8  | 595.7  | 425.6  | 561.6  | 0.591245592 | 559.25   | 535.675  | 23.575  | 1.044009894 | 0.5523   | -1.052 |
| 102836_at   | 420    | 389.5  | 502.1  | 565.4  | 382.4  | 539.5  | 454.6  | 562.5  | 0.796189859 | 469.25   | 484.75   | 15.5    | 0.968024755 | 0.803    | -1.032 |
| 102838_at   | 11.1   | 12.3   | 10.3   | 8.8    | 41.3   | 31.7   | 5.1    | 7.8    | 0.310690873 | 10.625   | 21.475   | 10.85   | 0.49476135  | 0.5177   | 1.428  |



|             |        |        |        |        |        |        |        |        |             |         |          |         |             |          |        |
|-------------|--------|--------|--------|--------|--------|--------|--------|--------|-------------|---------|----------|---------|-------------|----------|--------|
| 102839_at   | 369.1  | 253.4  | 320.7  | 332.9  | 233.5  | 360    | 329.5  | 244.7  | 0.519570141 | 319.025 | 291.925  | 27.1    | 1.092832063 | 0.4954   | -1.102 |
| 102840_at   | 51.7   | 87.2   | 147.2  | 37.2   | 130.9  | 75.6   | 52.6   | 55.1   | 0.943179496 | 80.825  | 78.55    | 2.275   | 1.028962444 | 0.9217   | -1.038 |
| 102841_at   | 260.9  | 243.4  | 186.9  | 240.2  | 392.1  | 204.3  | 321.6  | 239.7  | 0.280111252 | 232.85  | 289.425  | 56.575  | 0.804526216 | 0.2817   | 1.213  |
| 102843_s_at | 34.2   | 21.7   | 22.9   | 21.6   | 48     | 13.4   | 26.7   | 19.6   | 0.833406676 | 25.1    | 26.925   | 1.825   | 0.932219127 | 0.9473   | -1.02  |
| 102844_at   | 3.9    | 15.6   | 3.4    | 4.3    | 3.7    | 5.2    | 5.9    | 5.3    | 0.59103038  | 6.8     | 5.025    | 1.775   | 1.353233831 | 0.8045   | -1.1   |
| 102845_at   | 464.7  | 821.5  | 653.3  | 567.5  | 586.7  | 577.5  | 479.5  | 451.4  | 0.279230555 | 626.75  | 523.775  | 102.975 | 1.196601594 | 0.2749   | -1.179 |
| 102846_at   | 13     | 33.8   | 18.6   | 17.3   | 105.1  | 13.3   | 45.7   | 17.3   | 0.331087885 | 20.675  | 45.35    | 24.675  | 0.455898567 | 0.3556   | 1.673  |
| 102847_s_at | 66.9   | 104.3  | 65.2   | 43.1   | 96.3   | 81.4   | 48.9   | 82.8   | 0.661471141 | 69.875  | 77.35    | 7.475   | 0.903361345 | 0.624    | 1.128  |
| 102848_f_at | 2083.6 | 1906.9 | 2184.6 | 2212.3 | 2074.4 | 2233.8 | 2032.2 | 1858.7 | 0.665441347 | 2096.85 | 2049.775 | 47.075  | 1.022965935 | 0.6631   | -1.023 |
| 102849_at   | 75.6   | 99     | 73.6   | 124.2  | 111.3  | 105.7  | 91.1   | 118    | 0.361643645 | 93.1    | 106.525  | 13.425  | 0.873973246 | 0.3005   | 1.166  |
| 102850_at   | 239    | 676.6  | 412.4  | 465.2  | 327.6  | 444.3  | 417.6  | 451.7  | 0.710471381 | 448.3   | 410.3    | 38      | 1.09261516  | 0.8976   | -1.031 |
| 102851_s_at | 47.6   | 28     | 44.1   | 62.4   | 75.3   | 57.8   | 41.9   | 45.1   | 0.394651653 | 45.525  | 55.025   | 9.5     | 0.827351204 | 0.3791   | 1.224  |
| 102852_at   | 317.6  | 442.6  | 308.2  | 348.5  | 231.6  | 257.7  | 302.9  | 247.1  | 0.046083898 | 354.225 | 259.825  | 94.4    | 1.363321466 | 0.02268  | -1.356 |
| 102853_at   | 1219.9 | 1010.7 | 1322.3 | 1138.7 | 597.1  | 1034.9 | 857.9  | 1161.5 | 0.125011332 | 1172.9  | 912.85   | 260.05  | 1.284877033 | 0.1279   | -1.318 |
| 102854_s_at | 1005.3 | 785.7  | 794.9  | 1060.6 | 553.3  | 875.2  | 698.4  | 848.4  | 0.154116793 | 911.625 | 743.825  | 167.8   | 1.225590697 | 0.1603   | -1.234 |
| 102856_at   | 156.4  | 163.1  | 202.6  | 174.3  | 214    | 139.8  | 179.8  | 177    | 0.85323078  | 174.1   | 177.65   | 3.55    | 0.980016887 | 0.8993   | -1.014 |
| 102857_at   | 4.3    | 23.3   | 22.6   | 6.4    | 4.6    | 6.8    | 7.4    | 10.1   | 0.269452625 | 14.15   | 7.225    | 6.925   | 1.958477509 | 0.3682   | -1.57  |
| 102858_at   | 22.3   | 33.5   | 46.4   | 61.5   | 65.9   | 22.8   | 37.1   | 39.9   | 0.968956316 | 40.925  | 41.425   | 0.5     | 0.987929994 | 0.9722   | -1.011 |
| 102859_at   | 3785.6 | 3820   | 3706.2 | 4215   | 1509.1 | 2176.1 | 2029.3 | 1989.7 | 5.803E-05   | 3881.7  | 1926.05  | 1955.65 | 2.015368241 | 0.000167 | -2.032 |
| 102860_at   | 378.1  | 309.4  | 407.1  | 337.4  | 237.7  | 341.9  | 315.4  | 359.6  | 0.248079315 | 358     | 313.65   | 44.35   | 1.141399649 | 0.2558   | -1.149 |
| 102861_at   | 153.2  | 155.7  | 150.1  | 121.4  | 160.3  | 186.2  | 177.1  | 202.3  | 0.022281967 | 145.1   | 181.475  | 36.375  | 0.799559168 | 0.0252   | 1.252  |
| 102862_at   | 200    | 148.5  | 126.6  | 184.5  | 152.1  | 224.4  | 160.6  | 234.4  | 0.342877136 | 164.9   | 192.875  | 27.975  | 0.854957874 | 0.3514   | 1.167  |
| 102863_at   | 1016   | 843.5  | 874.4  | 1129.3 | 843.4  | 817    | 721.7  | 974.4  | 0.186015222 | 965.8   | 839.125  | 126.675 | 1.150960822 | 0.1791   | -1.15  |
| 102864_at   | 13.9   | 14.4   | 18.7   | 12     | 29.5   | 18.4   | 18.9   | 12.2   | 0.266193718 | 14.75   | 19.75    | 5       | 0.746835443 | 0.2541   | 1.291  |
| 102865_at   | 108.6  | 99     | 66.9   | 124.6  | 96.3   | 138.2  | 55.4   | 109.9  | 0.993676443 | 99.775  | 99.95    | 0.175   | 0.998249125 | 0.9192   | -1.025 |
| 102866_at   | 269.6  | 259.5  | 287.3  | 382.5  | 315.9  | 244.4  | 270.7  | 338.6  | 0.843174106 | 299.725 | 292.4    | 7.325   | 1.0250513   | 0.863    | -1.021 |
| 102867_at   | 116.1  | 99.7   | 99.4   | 110    | 110.6  | 100.6  | 87.4   | 109.9  | 0.562514415 | 106.3   | 102.125  | 4.175   | 1.040881273 | 0.5518   | -1.043 |
| 102868_g_at | 22.9   | 55.1   | 13.9   | 16.3   | 10     | 46.7   | 10.4   | 39.9   | 0.983085157 | 27.05   | 26.75    | 0.3     | 1.011214953 | 0.8567   | -1.103 |
| 102869_at   | 129.5  | 254.4  | 174.8  | 198.1  | 222.7  | 197.5  | 184.2  | 235.4  | 0.505099662 | 189.2   | 209.95   | 20.75   | 0.901166945 | 0.428    | 1.137  |
| 102870_at   | 673.8  | 653.6  | 599.8  | 822.9  | 1002   | 900.6  | 656.9  | 1198.4 | 0.107808579 | 687.525 | 939.475  | 251.95  | 0.731818303 | 0.08361  | 1.344  |
| 102871_at   | 180.6  | 405.7  | 243.8  | 421.2  | 356.5  | 397.2  | 427.6  | 409.2  | 0.251895028 | 312.825 | 397.625  | 84.8    | 0.786733732 | 0.2036   | 1.347  |
| 102872_f_at | 245.5  | 142.8  | 218.1  | 252.9  | 139.8  | 241.8  | 183.2  | 138.5  | 0.307641601 | 214.825 | 175.825  | 39      | 1.22181146  | 0.3184   | -1.225 |
| 102873_at   | 17.7   | 63.9   | 30     | 73.3   | 73.9   | 46.8   | 99.2   | 81.5   | 0.143078716 | 46.225  | 75.35    | 29.125  | 0.613470471 | 0.1527   | 1.832  |
| 102874_at   | 48.3   | 46.3   | 44.9   | 53.6   | 6.4    | 38.8   | 9.8    | 41     | 0.07534834  | 48.275  | 24       | 24.275  | 2.011458333 | 0.08391  | -2.683 |
| 102875_at   | 228.6  | 231.7  | 223.2  | 186.5  | 191.3  | 219.1  | 221.7  | 203.7  | 0.527897152 | 217.5   | 208.95   | 8.55    | 1.04091888  | 0.5562   | -1.039 |
| 102876_at   | 36.4   | 35.2   | 43     | 44.8   | 8.4    | 40.7   | 21     | 41.1   | 0.230887522 | 39.85   | 27.8     | 12.05   | 1.433453237 | 0.2121   | -1.702 |
| 102877_at   | 29.3   | 62.4   | 32     | 61.4   | 55.2   | 51.9   | 57.7   | 71.9   | 0.263677382 | 46.275  | 59.175   | 12.9    | 0.782002535 | 0.2153   | 1.349  |
| 102878_at   | 343.4  | 228.8  | 228.1  | 259.2  | 275.4  | 358.4  | 242.9  | 287.7  | 0.499460601 | 264.875 | 291.1    | 26.225  | 0.909910684 | 0.4621   | 1.104  |
| 102879_s_at | 152.3  | 147.6  | 121.5  | 151.5  | 205.3  | 114    | 156.9  | 192.2  | 0.336853352 | 143.225 | 167.1    | 23.875  | 0.857121484 | 0.3856   | 1.143  |
| 102880_at   | 227    | 96.1   | 139    | 96.7   | 50.9   | 149.5  | 184.4  | 33.6   | 0.49326995  | 139.7   | 104.6    | 35.1    | 1.335564054 | 0.3585   | -1.579 |
| 102881_at   | 273.4  | 184.7  | 267    | 277.2  | 153.6  | 271.5  | 229.5  | 269.1  | 0.598466921 | 250.575 | 230.925  | 19.65   | 1.085092563 | 0.5935   | -1.098 |
| 102882_at   | 18.7   | 11     | 15.6   | 18.8   | 27.5   | 12.9   | 7.8    | 23.1   | 0.731439468 | 16.025  | 17.825   | 1.8     | 0.899018233 | 0.9624   | -1.016 |
| 102883_at   | 301.1  | 527.4  | 321.9  | 457.8  | 382.1  | 412.7  | 425.5  | 418.4  | 0.898363888 | 402.05  | 409.675  | 7.625   | 0.981387685 | 0.7524   | -1.047 |
| 102884_at   | 15.9   | 16.8   | 20.1   | 52.9   | 29.3   | 44.5   | 73.9   | 30.5   | 0.233605733 | 26.425  | 44.55    | 18.125  | 0.59315376  | 0.1498   | 1.793  |
| 102885_at   | 281.6  | 175.5  | 274.4  | 214.3  | 279    | 254.3  | 248.4  | 239.4  | 0.52281457  | 236.45  | 255.275  | 18.825  | 0.926255998 | 0.4542   | 1.098  |
| 102886_at   | 401.9  | 551.8  | 387.9  | 480.7  | 257    | 419.6  | 332.5  | 417.9  | 0.119485771 | 455.575 | 356.75   | 98.825  | 1.277014716 | 0.125    | -1.289 |
| 102887_at   | 317.9  | 234.2  | 235.5  | 243    | 155.6  | 208.4  | 114.2  | 200.2  | 0.025344482 | 257.65  | 169.6    | 88.05   | 1.519162736 | 0.03171  | -1.548 |
| 102888_s_at | 150.5  | 308.2  | 246.2  | 240    | 248.6  | 260.3  | 229.3  | 249.9  | 0.764149251 | 236.225 | 247.025  | 10.8    | 0.956279729 | 0.6386   | -1.078 |
| 102889_r_at | 230    | 730.7  | 856.8  | 746.7  | 805.9  | 831    | 856.3  | 785.8  | 0.291695086 | 641.05  | 819.75   | 178.7   | 0.782006709 | 0.2871   | 1.431  |
| 102890_at   | 466.3  | 422.8  | 471    | 424.5  | 516.6  | 531.2  | 552.7  | 638.8  | 0.017501414 | 446.15  | 559.825  | 113.675 | 0.796945474 | 0.006725 | 1.252  |
| 102891_at   | 440.8  | 312.7  | 328.6  | 360.4  | 303.4  | 414.5  | 311.2  | 358.1  | 0.730702129 | 360.625 | 346.8    | 13.825  | 1.039864475 | 0.7277   | -1.039 |
| 102892_at   | 50.2   | 59.6   | 84     | 71.7   | 75.8   | 75.2   | 63     | 52.9   | 0.97084145  | 66.375  | 66.725   | 0.35    | 0.99475459  | 0.9284   | -1.013 |
| 102893_at   | 381.7  | 436.5  | 363.2  | 411.8  | 268.7  | 387.1  | 344.6  | 393.2  | 0.193402779 | 398.3   | 348.4    | 49.9    | 1.143226177 | 0.1916   | -1.153 |
| 102894_g_at | 426.4  | 626.7  | 426.4  | 542.6  | 533.9  | 473.9  | 477    | 647.2  | 0.680448512 | 505.525 | 533      | 27.475  | 0.948452158 | 0.6425   | -1.06  |
| 102895_at   | 421.7  | 426.7  | 305.2  | 444.3  | 323.7  | 355.5  | 343.1  | 469.1  | 0.580926421 | 399.475 | 372.85   | 26.625  | 1.071409414 | 0.5856   | -1.071 |
| 102896_at   | 126.6  | 130.6  | 165.1  | 168.9  | 146.9  | 196.9  | 168.9  | 206.2  | 0.119916548 | 147.8   | 179.725  | 31.925  | 0.822367506 | 0.1214   | 1.216  |



|             |        |        |        |        |        |        |        |        |             |          |          |         |             |          |        |
|-------------|--------|--------|--------|--------|--------|--------|--------|--------|-------------|----------|----------|---------|-------------|----------|--------|
| 102898_at   | 21.1   | 16.9   | 11.5   | 19.8   | 37.7   | 7.5    | 5.9    | 15.4   | 0.931893993 | 17.325   | 16.625   | 0.7     | 1.042105263 | 0.5345   | -1.334 |
| 102899_at   | 39.9   | 26.7   | 64.9   | 48.7   | 63.8   | 35.1   | 40.3   | 39.2   | 0.966681402 | 45.05    | 44.6     | 0.45    | 1.010089686 | 0.9593   | -1.012 |
| 102900_at   | 3.2    | 3.6    | 3.2    | 4.1    | 5.7    | 16.5   | 23     | 30.1   | 0.059769333 | 3.525    | 18.825   | 15.3    | 0.187250996 | 0.006368 | 4.576  |
| 102901_at   | 9.9    | 6.1    | 11.2   | 9.4    | 16.7   | 8      | 8.1    | 5.2    | 0.903622998 | 9.15     | 9.5      | 0.35    | 0.963157895 | 0.9149   | -1.031 |
| 102902_at   | 33.5   | 16.8   | 46.7   | 54.5   | 49.2   | 24.6   | 43.2   | 68     | 0.517219578 | 37.875   | 46.25    | 8.375   | 0.818918919 | 0.5242   | 1.256  |
| 102904_at   | 25.4   | 26     | 17.9   | 60.4   | 139    | 53.9   | 121.5  | 57.4   | 0.062467552 | 32.425   | 92.95    | 60.525  | 0.348843464 | 0.02392  | 2.926  |
| 102905_at   | 51.9   | 39.9   | 42.3   | 40     | 10.2   | 37.9   | 42.3   | 48.7   | 0.388301902 | 43.525   | 34.775   | 8.75    | 1.251617541 | 0.3529   | -1.446 |
| 102906_at   | 7.8    | 9.2    | 26     | 25.7   | 5.1    | 10.2   | 18.4   | 18.1   | 0.509896862 | 17.175   | 12.95    | 4.225   | 1.326254826 | 0.5865   | -1.292 |
| 102907_at   | 1635.4 | 1458.2 | 1273.5 | 1445.9 | 1464.5 | 1499.5 | 1746.6 | 1423.3 | 0.468527161 | 1453.25  | 1533.475 | 80.225  | 0.947684181 | 0.4577   | -1.056 |
| 102908_at   | 14.1   | 6.6    | 23.2   | 14.6   | 32.2   | 33.6   | 24.2   | 11.8   | 0.130070786 | 14.625   | 25.45    | 10.825  | 0.574656189 | 0.1614   | 1.766  |
| 102910_at   | 49.7   | 19.4   | 31.5   | 37.9   | 45.9   | 41.3   | 39.3   | 32.6   | 0.49583906  | 34.625   | 39.775   | 5.15    | 0.870521684 | 0.412    | 1.204  |
| 102911_at   | 481.5  | 569    | 628.5  | 507.4  | 469.9  | 483.6  | 539.5  | 655.3  | 0.864874434 | 546.6    | 537.075  | 9.525   | 1.017734953 | 0.8341   | -1.021 |
| 102912_at   | 915.8  | 753.2  | 781.2  | 846.6  | 530.5  | 847.7  | 719.1  | 884    | 0.417263472 | 824.2    | 745.325  | 78.875  | 1.105826317 | 0.3814   | -1.124 |
| 102913_at   | 0.7    | 10.3   | 1.1    | 1.9    | 5.9    | 7.4    | 0.7    | 1.1    | 0.926227135 | 3.5      | 3.775    | 0.275   | 0.927152318 | 0.8444   | 1.186  |
| 102914_s_at | 127.1  | 65.6   | 131.2  | 143.3  | 82.6   | 142.1  | 152.5  | 121.7  | 0.745128885 | 116.8    | 124.725  | 7.925   | 0.936460212 | 0.7288   | -1.086 |
| 102915_at   | 190.8  | 146.7  | 258.6  | 279.6  | 191    | 131.8  | 132.6  | 180.9  | 0.149377363 | 218.925  | 159.075  | 59.85   | 1.376237624 | 0.1401   | -1.353 |
| 102916_s_at | 100.3  | 218.8  | 116.5  | 219.5  | 139.7  | 251.9  | 133.2  | 333.5  | 0.418364939 | 163.775  | 214.575  | 50.8    | 0.763252942 | 0.4337   | 1.292  |
| 102917_at   | 33.6   | 75.9   | 72.7   | 92.4   | 23.1   | 48.8   | 88.9   | 113.4  | 0.996797287 | 68.65    | 68.55    | 0.1     | 1.001458789 | 0.8145   | -1.108 |
| 102918_at   | 50     | 40.1   | 47.5   | 50.5   | 49.2   | 156.4  | 95.1   | 212.5  | 0.106574608 | 47.025   | 128.3    | 81.275  | 0.366523772 | 0.03639  | 2.385  |
| 102919_at   | 295.2  | 298.5  | 291.7  | 384.7  | 237.8  | 297.6  | 276.6  | 316.9  | 0.259236407 | 317.525  | 282.225  | 35.3    | 1.125077509 | 0.2463   | -1.124 |
| 102920_at   | 20.4   | 45.3   | 57     | 53.2   | 95.9   | 78.6   | 69     | 86.9   | 0.010503342 | 43.975   | 82.6     | 38.625  | 0.532384988 | 0.03065  | 2.005  |
| 102921_s_at | 2.9    | 13.2   | 3.1    | 5.1    | 3.5    | 6.8    | 1.8    | 4.4    | 0.50055451  | 6.075    | 4.125    | 1.95    | 1.472727273 | 0.5387   | -1.342 |
| 102922_at   | 94.5   | 124.8  | 83.2   | 95.5   | 95.7   | 134    | 117.7  | 130.8  | 0.157917366 | 99.5     | 119.55   | 20.05   | 0.832287746 | 0.1556   | 1.205  |
| 102923_at   | 6.8    | 9.1    | 8.7    | 7.9    | 10.2   | 8.3    | 11     | 9.1    | 0.100236001 | 8.125    | 9.65     | 1.525   | 0.841968912 | 0.1067   | 1.184  |
| 102924_at   | 421.8  | 790.3  | 705.6  | 721.9  | 453.5  | 534.5  | 497.3  | 353.4  | 0.08612599  | 659.9    | 459.675  | 200.225 | 1.435579486 | 0.08583  | -1.413 |
| 102925_at   | 101    | 124.9  | 132.4  | 139.1  | 141.7  | 325.9  | 303.8  | 163.3  | 0.102095993 | 124.35   | 233.675  | 109.325 | 0.532149353 | 0.04299  | 1.772  |
| 102926_at   | 148    | 77.9   | 131.5  | 97.9   | 86.6   | 93.4   | 139.8  | 176.3  | 0.713225639 | 113.825  | 124.025  | 10.2    | 0.917758516 | 0.7525   | -1.076 |
| 102927_s_at | 305.3  | 319.3  | 373.6  | 289.4  | 337.2  | 331.3  | 396.7  | 429.7  | 0.138194469 | 321.9    | 373.725  | 51.825  | 0.861328517 | 0.1285   | 1.159  |
| 102928_at   | 935.4  | 1026.8 | 1187.6 | 1104.1 | 1465.6 | 976.1  | 1213.5 | 1212.8 | 0.238869292 | 1063.475 | 1217     | 153.525 | 0.87384963  | 0.2356   | 1.137  |
| 102929_s_at | 20.2   | 22.8   | 12.5   | 13.4   | 15.9   | 30.8   | 12.2   | 16.4   | 0.753324618 | 17.225   | 18.825   | 1.6     | 0.91500664  | 0.8246   | -1.059 |
| 102930_at   | 102.6  | 112.3  | 157.5  | 112.9  | 117.2  | 87.2   | 92.8   | 116.8  | 0.275328042 | 121.325  | 103.5    | 17.825  | 1.172222222 | 0.2528   | -1.166 |
| 102931_at   | 14.6   | 21.4   | 21.8   | 23.9   | 27.1   | 20.7   | 31.9   | 24.4   | 0.122295151 | 20.425   | 26.025   | 5.6     | 0.784822286 | 0.1305   | 1.282  |
| 102932_at   | 22.3   | 46.1   | 25.1   | 20.5   | 25.3   | 57.8   | 15.7   | 4.4    | 0.843780966 | 28.5     | 25.8     | 2.7     | 1.104651163 | 0.4947   | -1.512 |
| 102933_at   | 131.1  | 273.2  | 272.9  | 243.9  | 282.6  | 244.2  | 285.8  | 338    | 0.202764514 | 230.275  | 287.65   | 57.375  | 0.800538849 | 0.2209   | 1.293  |
| 102934_s_at | 557.8  | 479.2  | 530.9  | 622.9  | 439.8  | 466.7  | 427.4  | 518.2  | 0.063165652 | 547.7    | 463.025  | 84.675  | 1.182873495 | 0.05305  | -1.181 |
| 102935_at   | 376.3  | 271.9  | 342    | 285.6  | 279.2  | 251.6  | 306.8  | 239.1  | 0.143253461 | 318.95   | 269.175  | 49.775  | 1.184916876 | 0.1294   | -1.18  |
| 102936_at   | 88.5   | 110.2  | 113.7  | 129.7  | 109.4  | 99.5   | 119    | 128.2  | 0.751073701 | 110.525  | 114.025  | 3.5     | 0.969304977 | 0.7218   | -1.037 |
| 102937_at   | 125.8  | 274.9  | 223.9  | 252.1  | 214.8  | 219.3  | 229.4  | 295.7  | 0.610386762 | 219.175  | 239.8    | 20.625  | 0.913990826 | 0.5428   | 1.131  |
| 102938_at   | 21.7   | 19     | 64.2   | 30.7   | 57.2   | 59.7   | 25     | 51.6   | 0.314520294 | 33.9     | 48.375   | 14.475  | 0.700775194 | 0.2616   | 1.525  |
| 102939_s_at | 15.8   | 33.8   | 19.1   | 14.2   | 20.6   | 15     | 18.6   | 19.5   | 0.649924304 | 20.725   | 18.425   | 2.3     | 1.124830393 | 0.7646   | -1.066 |
| 102940_at   | 105.6  | 185.2  | 159.8  | 144.2  | 176.1  | 206.5  | 165.7  | 190.3  | 0.120604733 | 148.7    | 184.65   | 35.95   | 0.805307338 | 0.1184   | 1.263  |
| 102941_at   | 79.9   | 97.1   | 116    | 87.9   | 73.9   | 105.9  | 137.6  | 62.3   | 0.987897116 | 95.225   | 94.925   | 0.3     | 1.00316039  | 0.8385   | -1.042 |
| 102942_at   | 118.1  | 179.5  | 175.7  | 119.7  | 196.9  | 150.7  | 180.1  | 172.7  | 0.229724693 | 148.25   | 175.1    | 26.85   | 0.846659052 | 0.2069   | 1.199  |
| 102943_at   | 196.6  | 189.2  | 139.3  | 181.8  | 208.5  | 149.2  | 211.7  | 148.3  | 0.906211999 | 176.725  | 179.425  | 2.7     | 0.98495193  | 0.9451   | -1.009 |
| 102944_at   | 504.4  | 432.6  | 408.6  | 463.4  | 448.5  | 451.2  | 423.2  | 520.6  | 0.779086685 | 452.25   | 460.875  | 8.625   | 0.981285598 | 0.7733   | -1.019 |
| 102946_r_at | 55.3   | 51.5   | 62.3   | 51     | 75.7   | 47.1   | 67     | 60.2   | 0.317791832 | 55.025   | 62.5     | 7.475   | 0.8804      | 0.3361   | 1.123  |
| 102947_at   | 42.4   | 46.1   | 82.8   | 101.4  | 63.5   | 61.3   | 69.9   | 80.6   | 0.967732089 | 68.175   | 68.825   | 0.65    | 0.990555757 | 0.7577   | -1.075 |
| 102948_at   | 120.1  | 150.9  | 117.7  | 117.7  | 126.8  | 113.4  | 102.6  | 189.3  | 0.775150863 | 126.6    | 133.025  | 6.425   | 0.951700808 | 0.8612   | -1.027 |
| 102949_g_at | 430.9  | 390.8  | 476.3  | 291.3  | 256.8  | 334.8  | 304.3  | 323.8  | 0.09646176  | 397.325  | 304.925  | 92.4    | 1.303025334 | 0.08174  | -1.289 |
| 102950_at   | 15.6   | 24     | 42.9   | 20     | 5.4    | 9.8    | 20     | 19.8   | 0.152782135 | 25.625   | 13.75    | 11.875  | 1.863636364 | 0.1237   | -1.973 |
| 102951_at   | 218.9  | 150.2  | 235.5  | 199.1  | 95.9   | 229.5  | 205.4  | 231.1  | 0.789444604 | 200.925  | 190.475  | 10.45   | 1.054862843 | 0.6908   | -1.102 |
| 102952_g_at | 421.8  | 453.7  | 454    | 409.8  | 404.6  | 381.5  | 376.8  | 435.5  | 0.092446801 | 434.825  | 399.6    | 35.225  | 1.088150651 | 0.0893   | -1.089 |
| 102953_at   | 73.7   | 65.5   | 81.9   | 100.8  | 112    | 77.1   | 122.1  | 138.1  | 0.08836856  | 80.475   | 112.325  | 31.85   | 0.716447808 | 0.08204  | 1.383  |
| 102954_at   | 12.3   | 32.2   | 17.3   | 32.8   | 27.7   | 19.9   | 46     | 22.6   | 0.517825513 | 23.65    | 29.05    | 5.4     | 0.814113597 | 0.468    | 1.265  |
| 102955_at   | 142.4  | 143.4  | 109.7  | 97.8   | 92.3   | 114.8  | 114.6  | 186.9  | 0.878091715 | 123.325  | 127.15   | 3.825   | 0.96991742  | 0.9613   | -1.009 |
| 102956_at   | 4.7    | 19.1   | 10.3   | 5.3    | 11.3   | 9      | 12.2   | 10.2   | 0.822770696 | 9.85     | 10.675   | 0.825   | 0.922716628 | 0.4978   | 1.271  |



|             |        |        |        |        |        |        |        |        |             |          |          |         |             |          |        |
|-------------|--------|--------|--------|--------|--------|--------|--------|--------|-------------|----------|----------|---------|-------------|----------|--------|
| 102957_at   | 75.9   | 71.8   | 54.4   | 73.4   | 57.5   | 90.2   | 81.3   | 52.3   | 0.894817934 | 68.875   | 70.325   | 1.45    | 0.979381443 | 0.985    | -1.003 |
| 102958_at   | 80.8   | 90.3   | 84.5   | 59.2   | 61.1   | 53.6   | 100.7  | 81.8   | 0.741135844 | 78.7     | 74.3     | 4.4     | 1.059219381 | 0.6725   | -1.079 |
| 102959_at   | 227.3  | 125.4  | 200.5  | 218.7  | 108.5  | 149.1  | 160.2  | 144.4  | 0.106340845 | 192.975  | 140.55   | 52.425  | 1.372998933 | 0.1123   | -1.352 |
| 102960_at   | 677.5  | 696.6  | 805.8  | 701.1  | 938.4  | 769.4  | 738.7  | 754.4  | 0.203796191 | 720.25   | 800.225  | 79.975  | 0.900059358 | 0.179    | 1.108  |
| 102961_at   | 5.6    | 6.7    | 5.5    | 6.4    | 5.6    | 14.8   | 6.6    | 16.5   | 0.181501512 | 6.05     | 10.875   | 4.825   | 0.556321839 | 0.1329   | 1.619  |
| 102962_at   | 16.7   | 22.5   | 74.1   | 65.4   | 67.4   | 68.1   | 101.1  | 29.9   | 0.328382241 | 44.675   | 66.625   | 21.95   | 0.67054409  | 0.3067   | 1.66   |
| 102963_at   | 154.2  | 227.1  | 206.4  | 207.6  | 127    | 168.9  | 146.6  | 122.4  | 0.02643242  | 198.825  | 141.225  | 57.6    | 1.407859798 | 0.0227   | -1.405 |
| 102964_at   | 850.4  | 782.1  | 864.3  | 691.1  | 574    | 822.9  | 735.7  | 733.4  | 0.266646189 | 796.975  | 716.5    | 80.475  | 1.112316818 | 0.2713   | -1.117 |
| 102965_at   | 197.7  | 242.8  | 221.5  | 259.7  | 147.9  | 182.9  | 255.3  | 213.2  | 0.301157413 | 230.425  | 199.825  | 30.6    | 1.153133992 | 0.2724   | -1.17  |
| 102966_at   | 160.5  | 158.9  | 113.9  | 150.8  | 102    | 111.1  | 86     | 158.2  | 0.151428007 | 146.025  | 114.325  | 31.7    | 1.277279685 | 0.1362   | -1.298 |
| 102967_at   | 7.7    | 7.8    | 10.9   | 25.4   | 8.9    | 7.3    | 19.8   | 44.8   | 0.49023968  | 12.95    | 20.2     | 7.25    | 0.641089109 | 0.5578   | 1.365  |
| 102968_at   | 160.8  | 317.4  | 269.2  | 230.5  | 450    | 338.2  | 385.2  | 336.1  | 0.02165011  | 244.475  | 377.375  | 132.9   | 0.647830407 | 0.02931  | 1.579  |
| 102969_at   | 143.8  | 493.8  | 303.4  | 292.1  | 450    | 315.1  | 343.1  | 290.6  | 0.629227088 | 308.275  | 349.7    | 41.425  | 0.881541321 | 0.4836   | 1.224  |
| 102970_at   | 229.9  | 216.6  | 235.6  | 185.5  | 184.6  | 144    | 154.7  | 156.7  | 0.007901857 | 216.9    | 160      | 56.9    | 1.355625    | 0.006694 | -1.356 |
| 102971_at   | 26.5   | 21.1   | 27.3   | 20.9   | 32.1   | 22.8   | 22.6   | 26.6   | 0.489354862 | 23.95    | 26.025   | 2.075   | 0.920268972 | 0.5016   | -1.082 |
| 102972_s_at | 84.5   | 101.8  | 95.4   | 112.6  | 106.6  | 63     | 82.1   | 109.7  | 0.541601168 | 98.575   | 90.35    | 8.225   | 1.091034864 | 0.486    | -1.112 |
| 102973_f_at | 8.8    | 10.8   | 14.6   | 26.8   | 20.5   | 5.2    | 11.8   | 14.8   | 0.687671693 | 15.25    | 13.075   | 2.175   | 1.166347992 | 0.663    | -1.19  |
| 102974_at   | 5.5    | 12     | 6.1    | 12.6   | 13.3   | 9      | 15     | 8.1    | 0.395988128 | 9.05     | 11.35    | 2.3     | 0.797356828 | 0.3616   | 1.3    |
| 102975_at   | 3.6    | 4.9    | 7.9    | 8.9    | 22.9   | 6.6    | 4.4    | 3.1    | 0.578129737 | 6.325    | 9.25     | 2.925   | 0.683783784 | 0.7959   | 1.14   |
| 102976_at   | 555    | 357.2  | 428.2  | 390.3  | 206.1  | 331.3  | 372    | 275.3  | 0.052843536 | 432.675  | 296.175  | 136.5   | 1.460876171 | 0.05123  | -1.475 |
| 102977_at   | 27.2   | 21.4   | 22.9   | 25.2   | 22.7   | 19.7   | 40.4   | 22     | 0.706392752 | 24.175   | 26.2     | 2.025   | 0.922709924 | 0.8151   | -1.042 |
| 102978_at   | 49.8   | 48.6   | 67.5   | 162.3  | 232.8  | 86.5   | 180.2  | 164.9  | 0.084524168 | 82.05    | 166.1    | 84.05   | 0.49397953  | 0.0688   | 2.18   |
| 102979_at   | 43.9   | 110.9  | 77.1   | 86.5   | 115.2  | 97.9   | 85.4   | 54.7   | 0.660681938 | 79.6     | 88.3     | 8.7     | 0.901472254 | 0.6497   | 1.128  |
| 102980_at   | 236.2  | 347.1  | 305    | 329.9  | 292.2  | 222.5  | 324.8  | 340.7  | 0.799568029 | 304.55   | 295.05   | 9.5     | 1.032197933 | 0.7988   | -1.035 |
| 102981_at   | 169.9  | 144    | 162.6  | 194.4  | 89.9   | 214.5  | 62.4   | 106.1  | 0.237243839 | 167.725  | 118.225  | 49.5    | 1.41869317  | 0.142    | -1.569 |
| 102982_at   | 1065.8 | 917.5  | 925.5  | 1145.4 | 700.2  | 759.2  | 714.6  | 1259.7 | 0.346149956 | 1013.55  | 858.425  | 155.125 | 1.180708856 | 0.2443   | -1.213 |
| 102983_at   | 356.1  | 510.3  | 441.9  | 480    | 423.1  | 576.5  | 580.1  | 550.8  | 0.137868251 | 447.075  | 532.625  | 85.55   | 0.839380427 | 0.1563   | 1.192  |
| 102984_g_at | 597.3  | 879    | 640    | 711.3  | 717.5  | 989.2  | 743.2  | 892.9  | 0.198937843 | 706.9    | 835.7    | 128.8   | 0.845877707 | 0.1862   | 1.185  |
| 102985_at   | 501    | 354.1  | 513.8  | 485.3  | 463.7  | 463.7  | 454.2  | 365.2  | 0.567872966 | 463.55   | 436.7    | 26.85   | 1.061483856 | 0.6248   | -1.055 |
| 102986_at   | 155.3  | 139.2  | 220.6  | 165.6  | 204.6  | 137.6  | 205.5  | 209.3  | 0.46907624  | 170.175  | 189.25   | 19.075  | 0.899207398 | 0.4782   | -1.113 |
| 102987_at   | 50.4   | 47.5   | 39.1   | 38.2   | 105.9  | 46.4   | 43.6   | 9.9    | 0.728880757 | 43.8     | 51.45    | 7.65    | 0.851311953 | 0.8024   | -1.139 |
| 102988_at   | 589.9  | 981.1  | 945    | 750.6  | 826.3  | 858.3  | 793.8  | 615.3  | 0.700519206 | 816.65   | 773.425  | 43.225  | 1.055887772 | 0.7713   | -1.043 |
| 102989_at   | 14.7   | 10.3   | 12.7   | 12.7   | 10.5   | 9      | 17     | 11.2   | 0.747398164 | 12.6     | 11.925   | 0.675   | 1.056603774 | 0.6456   | -1.078 |
| 102990_at   | 2527.7 | 2639.8 | 2246.1 | 2322.4 | 2182.6 | 3282.4 | 2960   | 2593.1 | 0.277481311 | 2434     | 2754.525 | 320.525 | 0.883636925 | 0.2773   | 1.121  |
| 102991_s_at | 325.8  | 315.1  | 280.2  | 377.9  | 465.2  | 311.5  | 381.5  | 249.4  | 0.619544581 | 324.75   | 351.9    | 27.15   | 0.9228474   | 0.7006   | -1.061 |
| 102992_at   | 40.5   | 29.1   | 41.9   | 26.2   | 52.8   | 78.1   | 45.6   | 32.2   | 0.163984498 | 34.425   | 52.175   | 17.75   | 0.659798754 | 0.1259   | 1.472  |
| 102993_at   | 393.6  | 354.5  | 384.5  | 371.8  | 492.8  | 375.2  | 386.6  | 417.8  | 0.212876594 | 376.1    | 418.1    | 42      | 0.899545563 | 0.1721   | -1.106 |
| 102994_at   | 22.4   | 27.4   | 9.6    | 21.3   | 31.2   | 24.6   | 12.9   | 56.7   | 0.32665341  | 20.175   | 31.35    | 11.175  | 0.64354067  | 0.3648   | 1.455  |
| 102995_s_at | 39.1   | 23.9   | 39.3   | 49.1   | 40.6   | 79.4   | 53.7   | 42.7   | 0.178058167 | 37.85    | 54.1     | 16.25   | 0.699630314 | 0.1526   | 1.423  |
| 102996_at   | 262.4  | 444.6  | 362.6  | 333.1  | 357.6  | 366.7  | 456.5  | 397.9  | 0.362655409 | 350.675  | 394.675  | 44      | 0.888515867 | 0.3244   | 1.14   |
| 102998_at   | 19.3   | 16.9   | 12.4   | 18.7   | 27.4   | 18     | 19     | 40.6   | 0.168546213 | 16.825   | 26.25    | 9.425   | 0.640952381 | 0.108    | 1.498  |
| 103001_at   | 283.3  | 471.5  | 370.1  | 423.2  | 417    | 396.1  | 462.9  | 451.9  | 0.358402086 | 387.025  | 431.975  | 44.95   | 0.895943052 | 0.32     | 1.134  |
| 103002_at   | 1298.5 | 1675.4 | 1410.4 | 1079.5 | 1291.8 | 1449.9 | 1583.8 | 1310.9 | 0.773400745 | 1365.95  | 1409.1   | 43.15   | 0.969377617 | 0.7106   | -1.041 |
| 103003_i_at | 1.1    | 6.5    | 6.7    | 0.7    | 3.1    | 2      | 21.1   | 1.6    | 0.559935887 | 3.75     | 6.95     | 3.2     | 0.539568345 | 0.5941   | 1.594  |
| 103004_r_at | 12.6   | 1.8    | 13.8   | 6      | 2.8    | 4      | 6.9    | 18.6   | 0.921106442 | 8.55     | 8.075    | 0.475   | 1.058823529 | 0.9134   | -1.073 |
| 103005_s_at | 82.3   | 76.2   | 95.9   | 91.2   | 66.5   | 98.8   | 68.5   | 61.7   | 0.250784808 | 86.4     | 73.875   | 12.525  | 1.169543147 | 0.1964   | -1.185 |
| 103006_at   | 154.8  | 213.1  | 204.9  | 215.9  | 173.6  | 246.2  | 218.8  | 251.2  | 0.312313285 | 197.175  | 222.45   | 25.275  | 0.886378962 | 0.3435   | 1.126  |
| 103007_at   | 71.9   | 121.4  | 69.1   | 47.3   | 120.1  | 112.1  | 123.2  | 106.7  | 0.089871057 | 77.425   | 115.525  | 38.1    | 0.670201255 | 0.05928  | 1.578  |
| 103009_at   | 202.7  | 356.9  | 259.4  | 271    | 245    | 269.9  | 190.2  | 288.2  | 0.554559693 | 272.5    | 248.325  | 24.175  | 1.09735226  | 0.5869   | -1.088 |
| 103010_at   | 267.5  | 241.8  | 305.2  | 227.7  | 157    | 256.6  | 334.1  | 223.5  | 0.683041913 | 260.55   | 242.8    | 17.75   | 1.073105437 | 0.5756   | -1.106 |
| 103011_at   | 1333.6 | 1242.8 | 1339   | 1374.3 | 1004.7 | 1318.1 | 1375.4 | 1668.6 | 0.897789519 | 1322.425 | 1341.7   | 19.275  | 0.985633897 | 0.9936   | -1.001 |
| 103012_at   | 927.7  | 919.2  | 667    | 514.8  | 983.6  | 972.7  | 720    | 1110.1 | 0.196983083 | 757.175  | 946.6    | 189.425 | 0.799889077 | 0.2052   | 1.271  |
| 103013_at   | 333.1  | 368.1  | 510.1  | 480    | 393.6  | 484.7  | 423.5  | 625    | 0.413423666 | 422.825  | 481.7    | 58.875  | 0.877776624 | 0.4031   | 1.139  |
| 103015_at   | 87.7   | 93.2   | 65.3   | 126    | 103.9  | 103.4  | 114.4  | 133.2  | 0.212573643 | 93.05    | 113.725  | 20.675  | 0.818201803 | 0.1817   | 1.249  |
| 103016_s_at | 290.8  | 224.9  | 303    | 338.3  | 230.9  | 226.9  | 272.4  | 311    | 0.385636817 | 289.25   | 260.3    | 28.95   | 1.111217826 | 0.4016   | -1.109 |
| 103017_at   | 551    | 498.4  | 435.9  | 441.1  | 508.5  | 602.8  | 491.8  | 592.5  | 0.13769026  | 481.6    | 548.9    | 67.3    | 0.877391146 | 0.1348   | 1.14   |



|             |        |        |        |        |        |        |        |        |             |          |          |         |             |          |        |
|-------------|--------|--------|--------|--------|--------|--------|--------|--------|-------------|----------|----------|---------|-------------|----------|--------|
| 103018_at   | 452.4  | 935.5  | 512.8  | 846.2  | 599.1  | 508    | 557    | 815    | 0.648423133 | 686.725  | 619.775  | 66.95   | 1.108023073 | 0.7429   | -1.074 |
| 103020_s_at | 1318.5 | 1512.5 | 1301   | 1456.3 | 1180.4 | 1488.4 | 1231.3 | 1511.3 | 0.677290142 | 1397.075 | 1352.85  | 44.225  | 1.032690247 | 0.6407   | -1.037 |
| 103021_r_at | 146.3  | 177.1  | 123.6  | 241.8  | 128.6  | 152.7  | 139.8  | 161.1  | 0.381757353 | 172.2    | 145.55   | 26.65   | 1.183098592 | 0.3928   | -1.15  |
| 103022_at   | 9.1    | 4.3    | 20.2   | 19.6   | 23.3   | 11.4   | 16.5   | 21.9   | 0.343289184 | 13.3     | 18.275   | 4.975   | 0.727770178 | 0.3014   | 1.579  |
| 103023_at   | 83.8   | 88.1   | 84.3   | 69.6   | 88.3   | 93.2   | 87.2   | 112.2  | 0.105612211 | 81.45    | 95.225   | 13.775  | 0.85534261  | 0.09573  | 1.167  |
| 103024_at   | 20.8   | 18.4   | 43.3   | 30     | 27.3   | 37.1   | 32.5   | 40.5   | 0.375665582 | 28.125   | 34.35    | 6.225   | 0.818777293 | 0.2902   | 1.278  |
| 103025_at   | 432.8  | 735.4  | 451.9  | 617.8  | 846.9  | 652.3  | 915.2  | 614.5  | 0.102260063 | 559.475  | 757.225  | 197.75  | 0.738849087 | 0.09826  | 1.367  |
| 103026_f_at | 208.6  | 214.2  | 251.5  | 232.8  | 246.5  | 176.8  | 187.6  | 207.7  | 0.276982006 | 226.775  | 204.65   | 22.125  | 1.10811141  | 0.2473   | -1.114 |
| 103027_at   | 1256.9 | 1215.4 | 1207.6 | 1203.7 | 923    | 1202.4 | 1072.1 | 1272.1 | 0.27191774  | 1220.9   | 1117.4   | 103.5   | 1.092625738 | 0.229    | -1.101 |
| 103028_at   | 68.1   | 74     | 68.6   | 95.8   | 96.3   | 70.4   | 69.4   | 91.7   | 0.598878176 | 76.625   | 81.95    | 5.325   | 0.935021354 | 0.5958   | -1.068 |
| 103029_at   | 1402.7 | 1594.5 | 1217.2 | 1442.2 | 1756.7 | 1712.1 | 1612.2 | 1491.1 | 0.060196468 | 1414.15  | 1643.025 | 228.875 | 0.860699016 | 0.06171  | 1.165  |
| 103030_at   | 255.4  | 436.1  | 411.7  | 365.8  | 242.4  | 566.4  | 337.3  | 433.1  | 0.74491911  | 367.25   | 394.8    | 27.55   | 0.930217832 | 0.8437   | -1.046 |
| 103031_g_at | 247.9  | 415.7  | 358.6  | 367.7  | 322.1  | 385.7  | 411    | 475.6  | 0.32468299  | 347.475  | 398.6    | 51.125  | 0.871738585 | 0.3323   | 1.156  |
| 103032_at   | 859.8  | 1235   | 1217.2 | 1054.8 | 1157   | 1209.1 | 1165.3 | 1329.1 | 0.264514109 | 1091.7   | 1215.125 | 123.425 | 0.898426088 | 0.2454   | 1.123  |
| 103033_at   | 242.6  | 203.7  | 245    | 230.9  | 372.9  | 294.1  | 343.1  | 269.5  | 0.024346823 | 230.55   | 319.9    | 89.35   | 0.720693967 | 0.008941 | 1.38   |
| 103034_at   | 458.5  | 457.9  | 445.6  | 373.1  | 534.4  | 472    | 514.6  | 297.9  | 0.73526119  | 433.775  | 454.725  | 20.95   | 0.953928198 | 0.8645   | -1.026 |
| 103035_at   | 139.2  | 220.5  | 192.8  | 177.3  | 303.2  | 272.9  | 256.6  | 223    | 0.014118535 | 182.45   | 263.925  | 81.475  | 0.691294875 | 0.01755  | 1.457  |
| 103036_at   | 705.2  | 593.8  | 613.8  | 602.4  | 561.6  | 652.7  | 673.4  | 490.5  | 0.520672364 | 628.8    | 594.55   | 34.25   | 1.057606593 | 0.4881   | -1.063 |
| 103037_at   | 285.2  | 305.8  | 306.1  | 336.3  | 309.8  | 360.7  | 356.8  | 367.6  | 0.055628735 | 308.35   | 348.725  | 40.375  | 0.884221091 | 0.05584  | 1.13   |
| 103038_at   | 109.8  | 144.9  | 145.9  | 126.7  | 200.4  | 123.6  | 196.7  | 128.4  | 0.250648812 | 131.825  | 162.275  | 30.45   | 0.812355569 | 0.2489   | 1.208  |
| 103039_at   | 9.4    | 11.6   | 11.1   | 33.9   | 16.9   | 32.5   | 70.8   | 48     | 0.111323078 | 16.5     | 42.05    | 25.55   | 0.392390012 | 0.06498  | 2.6    |
| 103040_at   | 27.3   | 8      | 6.3    | 58.5   | 12.9   | 32.6   | 41.5   | 72.6   | 0.424676957 | 25.025   | 39.9     | 14.875  | 0.627192982 | 0.3194   | 1.997  |
| 103041_at   | 72.6   | 40.3   | 66.7   | 107    | 111.3  | 133.7  | 127.6  | 127.5  | 0.024167195 | 71.65    | 125.025  | 53.375  | 0.573085383 | 0.02416  | 1.846  |
| 103043_at   | 393    | 356.3  | 473.5  | 484.9  | 428.6  | 457.1  | 554.8  | 509    | 0.199638324 | 426.925  | 487.375  | 60.45   | 0.875968197 | 0.1982   | 1.145  |
| 103044_g_at | 719.3  | 753.8  | 784.9  | 781.1  | 761.4  | 589.5  | 654.6  | 768.4  | 0.227376613 | 759.775  | 693.475  | 66.3    | 1.095605465 | 0.1983   | -1.102 |
| 103045_at   | 51.5   | 51.9   | 85     | 70.5   | 74     | 77.2   | 46.4   | 54.6   | 0.88401572  | 64.725   | 63.05    | 1.675   | 1.026566217 | 0.8872   | -1.026 |
| 103046_at   | 88.4   | 98.2   | 116.1  | 74     | 153    | 74.8   | 136.6  | 150.9  | 0.159163162 | 94.175   | 128.825  | 34.65   | 0.731030468 | 0.1895   | 1.334  |
| 103047_at   | 1007.3 | 801.6  | 715.1  | 717.2  | 511.9  | 764.7  | 669.3  | 575.8  | 0.089482095 | 810.3    | 630.425  | 179.875 | 1.285323393 | 0.07786  | -1.287 |
| 103048_at   | 366.1  | 706.8  | 486.5  | 537.2  | 397.4  | 444.9  | 411.8  | 421.1  | 0.233028102 | 524.15   | 418.8    | 105.35  | 1.251552053 | 0.2014   | -1.219 |
| 103049_at   | 319.7  | 317.2  | 300.8  | 42     | 239.7  | 338.9  | 200.3  | 501.5  | 0.460644538 | 244.925  | 320.1    | 75.175  | 0.765151515 | 0.4251   | 1.59   |
| 103050_at   | 4219.1 | 4546.4 | 4060.1 | 4410.5 | 3767.7 | 4321.9 | 3596.6 | 4569   | 0.383290579 | 4309.025 | 4063.8   | 245.225 | 1.060343767 | 0.3497   | -1.064 |
| 103051_at   | 93.7   | 80     | 55.4   | 95.3   | 92     | 88.2   | 27.5   | 142.2  | 0.813213739 | 81.1     | 87.475   | 6.375   | 0.927122035 | 0.8871   | -1.057 |
| 103052_r_at | 534.9  | 780.2  | 559.6  | 686.5  | 669.1  | 706.2  | 828.5  | 707.1  | 0.2491331   | 640.3    | 727.725  | 87.425  | 0.879865334 | 0.2202   | 1.146  |
| 103053_at   | 62.5   | 64.8   | 58.8   | 192.1  | 196.9  | 85.9   | 152.2  | 184.6  | 0.194292442 | 94.55    | 154.9    | 60.35   | 0.610393802 | 0.1363   | 1.796  |
| 103054_at   | 419.7  | 860.5  | 414.1  | 910.6  | 408.3  | 577.7  | 731.1  | 696    | 0.769116198 | 651.225  | 603.275  | 47.95   | 1.079482823 | 0.9054   | -1.032 |
| 103055_r_at | 622.7  | 586.7  | 779.7  | 856.6  | 810.1  | 806.3  | 770.9  | 869.5  | 0.208455321 | 711.425  | 814.2    | 102.775 | 0.873771801 | 0.1686   | 1.157  |
| 103056_at   | 514    | 521.2  | 534.6  | 500    | 415.5  | 461.6  | 412.5  | 620.8  | 0.477979236 | 517.45   | 477.6    | 39.85   | 1.083438023 | 0.3675   | -1.099 |
| 103057_at   | 743    | 911.4  | 809.5  | 793.9  | 811    | 614.7  | 710.7  | 705    | 0.100074369 | 814.45   | 710.35   | 104.1   | 1.146547477 | 0.09763  | -1.149 |
| 103058_f_at | 2.7    | 25.5   | 9.2    | 7.9    | 15.7   | 29.6   | 5.6    | 2.1    | 0.815842297 | 11.325   | 13.25    | 1.925   | 0.854716981 | 0.9862   | -1.014 |
| 103059_at   | 115.8  | 122.9  | 79.4   | 94.8   | 120.1  | 58.5   | 46.3   | 92.7   | 0.276901877 | 103.225  | 79.4     | 23.825  | 1.300062972 | 0.2309   | -1.373 |
| 103060_at   | 167    | 254.8  | 249.1  | 139.7  | 313.9  | 335.8  | 320.9  | 213.1  | 0.060045173 | 202.65   | 295.925  | 93.275  | 0.684801892 | 0.07304  | 1.485  |
| 103061_at   | 22.3   | 19.4   | 26     | 44.2   | 45     | 34     | 36.7   | 51.4   | 0.095426439 | 27.975   | 41.775   | 13.8    | 0.669658887 | 0.07369  | 1.552  |
| 103062_at   | 238.7  | 219.7  | 226.9  | 234.1  | 224.9  | 265.8  | 225.8  | 308.1  | 0.277198379 | 229.85   | 256.15   | 26.3    | 0.897325786 | 0.2429   | 1.105  |
| 103063_at   | 724.8  | 541.4  | 498.1  | 596.1  | 482.7  | 555    | 561.1  | 547.1  | 0.366893458 | 590.1    | 536.475  | 53.625  | 1.09995806  | 0.3605   | -1.091 |
| 103064_at   | 763.7  | 576.3  | 700.3  | 799.6  | 759.2  | 557.2  | 748.7  | 725.6  | 0.86278283  | 709.975  | 697.675  | 12.3    | 1.017629985 | 0.8702   | -1.018 |
| 103065_at   | 996.6  | 958.9  | 991.9  | 1258.5 | 686.9  | 1025.3 | 813.4  | 1134.5 | 0.31387032  | 1051.475 | 915.025  | 136.45  | 1.149121609 | 0.285    | -1.164 |
| 103066_at   | 148.1  | 77     | 120.8  | 144.6  | 200.4  | 147.4  | 128.5  | 171    | 0.133100477 | 122.625  | 161.825  | 39.2    | 0.757763016 | 0.1505   | 1.343  |
| 103067_at   | 762.2  | 649.1  | 703.1  | 606.7  | 549.2  | 766.3  | 588.2  | 534.8  | 0.313608429 | 680.275  | 609.625  | 70.65   | 1.115890917 | 0.2698   | -1.124 |
| 103068_at   | 226.3  | 184.6  | 187.7  | 218.1  | 200.8  | 184.2  | 195.1  | 172.7  | 0.25061689  | 204.175  | 188.2    | 15.975  | 1.084883103 | 0.2457   | -1.082 |
| 103069_at   | 434.2  | 327.3  | 348.1  | 310.7  | 354.1  | 313    | 295.7  | 352.9  | 0.44233207  | 355.075  | 328.925  | 26.15   | 1.079501406 | 0.4412   | -1.074 |
| 103070_at   | 150.4  | 260.7  | 109.3  | 171.2  | 168.9  | 179    | 227.4  | 268.6  | 0.374918382 | 172.9    | 210.975  | 38.075  | 0.81952838  | 0.3136   | 1.26   |
| 103071_at   | 717.2  | 702.8  | 645.8  | 623    | 592.4  | 676.1  | 602.2  | 559    | 0.101006177 | 672.2    | 607.425  | 64.775  | 1.10663868  | 0.09777  | -1.107 |
| 103072_at   | 3528.5 | 2559   | 3344   | 2622.2 | 4297.3 | 2877.5 | 4083.8 | 4512.4 | 0.086344429 | 3013.425 | 3942.75  | 929.325 | 0.764295225 | 0.09061  | 1.302  |
| 103073_i_at | 2924.3 | 2638.1 | 3255.7 | 2361.9 | 2671.8 | 2780   | 3160.5 | 2175.9 | 0.737696846 | 2795     | 2697.05  | 97.95   | 1.036317458 | 0.7301   | -1.038 |
| 103074_f_at | 1238.2 | 1245.4 | 1225.8 | 1341.7 | 1254.1 | 1311.5 | 1231.2 | 1388   | 0.47754024  | 1262.775 | 1296.2   | 33.425  | 0.974213084 | 0.4765   | -1.026 |
| 103075_at   | 138.2  | 152.2  | 161.7  | 226.9  | 163.6  | 271.9  | 184.4  | 269.6  | 0.182994085 | 169.75   | 222.375  | 52.625  | 0.763350197 | 0.1711   | 1.301  |



|             |        |        |        |        |        |        |        |        |             |         |          |         |             |           |        |
|-------------|--------|--------|--------|--------|--------|--------|--------|--------|-------------|---------|----------|---------|-------------|-----------|--------|
| 103076_at   | 397    | 323.6  | 410.1  | 423.8  | 348.8  | 364.3  | 426.1  | 233.3  | 0.37110912  | 388.625 | 343.125  | 45.5    | 1.132604736 | 0.3543    | -1.153 |
| 103078_at   | 312.4  | 367.6  | 400.4  | 439.5  | 283.8  | 379.6  | 348.1  | 292.9  | 0.178677679 | 379.975 | 326.1    | 53.875  | 1.165210058 | 0.1802    | -1.165 |
| 103079_at   | 866.5  | 961.4  | 912.9  | 680.5  | 1025.8 | 812.9  | 957.6  | 739.6  | 0.760454219 | 855.325 | 883.975  | 28.65   | 0.967589581 | 0.7676    | -1.034 |
| 103080_at   | 206.8  | 251.9  | 203.2  | 219    | 203.1  | 178.4  | 218    | 243.2  | 0.606198755 | 220.225 | 210.675  | 9.55    | 1.045330485 | 0.584     | -1.048 |
| 103081_at   | 1074   | 1542.4 | 1204.1 | 1256.3 | 1464.2 | 1174.6 | 1552.5 | 1441.7 | 0.320689165 | 1269.2  | 1408.25  | 139.05  | 0.90126043  | 0.3108    | 1.113  |
| 103082_at   | 687.6  | 818.1  | 672.8  | 925.6  | 583.9  | 819.3  | 797.3  | 809    | 0.782785298 | 776.025 | 752.375  | 23.65   | 1.031433793 | 0.7848    | -1.032 |
| 103083_at   | 77.1   | 136.8  | 112.8  | 98.2   | 94.7   | 111.3  | 169.1  | 103.7  | 0.546305897 | 106.225 | 119.7    | 13.475  | 0.887426901 | 0.5395    | 1.121  |
| 103084_at   | 11.7   | 31.6   | 18     | 14.5   | 63     | 7.9    | 19.4   | 15.7   | 0.59886257  | 18.95   | 26.5     | 7.55    | 0.71509434  | 0.8261    | 1.117  |
| 103085_at   | 181.1  | 116.9  | 146.2  | 229.4  | 133    | 202    | 132.9  | 214.4  | 0.949022737 | 168.4   | 170.575  | 2.175   | 0.987249011 | 0.9253    | -1.019 |
| 103086_at   | 43.2   | 48.7   | 51.6   | 63     | 55.5   | 57.8   | 46.1   | 66.3   | 0.445975667 | 51.625  | 56.425   | 4.8     | 0.914931325 | 0.4382    | -1.094 |
| 103087_at   | 132.4  | 114    | 96.4   | 89.6   | 93.9   | 90.7   | 58.2   | 66.2   | 0.056413034 | 108.1   | 77.25    | 30.85   | 1.399352751 | 0.05686   | -1.412 |
| 103088_at   | 1.2    | 9.1    | 4.7    | 4      | 2.7    | 4.6    | 3.7    | 3.8    | 0.572322013 | 4.75    | 3.7      | 1.05    | 1.283783784 | 0.95      | -1.029 |
| 103089_at   | 51.1   | 14     | 44.6   | 69     | 13.5   | 65.6   | 24.5   | 78.8   | 0.963802677 | 44.675  | 45.6     | 0.925   | 0.979714912 | 0.9119    | -1.065 |
| 103090_at   | 381.2  | 440.8  | 668.1  | 759.9  | 502.5  | 308.2  | 578.5  | 850.3  | 0.986081729 | 562.5   | 559.875  | 2.625   | 1.004688547 | 0.9187    | -1.029 |
| 103091_at   | 137.1  | 162.3  | 90.6   | 141.3  | 173.8  | 150.9  | 101.4  | 160.1  | 0.552968285 | 132.825 | 146.55   | 13.725  | 0.906345957 | 0.5835    | -1.106 |
| 103092_at   | 733.3  | 658    | 646.6  | 855    | 495.7  | 655.7  | 743.9  | 804.8  | 0.582574917 | 723.225 | 675.025  | 48.2    | 1.071404763 | 0.5488    | -1.082 |
| 103094_at   | 1388.1 | 1223.3 | 1324.1 | 1284.5 | 1437.4 | 1278.6 | 1356.1 | 1467.5 | 0.197292706 | 1305    | 1384.9   | 79.9    | 0.942306304 | 0.1983    | -1.061 |
| 103095_at   | 306.3  | 320.4  | 364.2  | 289.5  | 206    | 384.3  | 325.6  | 447.1  | 0.722553159 | 320.1   | 340.75   | 20.65   | 0.939398386 | 0.8827    | -1.027 |
| 103096_at   | 132    | 140.5  | 148.7  | 240.9  | 191.4  | 225.6  | 165.6  | 174    | 0.450423693 | 165.525 | 189.15   | 23.625  | 0.875099128 | 0.3462    | 1.17   |
| 103097_at   | 422    | 393.8  | 408.9  | 382.5  | 298.7  | 404.2  | 305.1  | 429    | 0.297290014 | 401.8   | 359.25   | 42.55   | 1.118441197 | 0.2435    | -1.132 |
| 103098_at   | 521.5  | 591.4  | 460.3  | 438.3  | 550.5  | 537.1  | 566.4  | 512.4  | 0.350324543 | 502.875 | 541.6    | 38.725  | 0.928498892 | 0.2978    | -1.084 |
| 103099_f_at | 1713   | 2095.8 | 2121.6 | 1809.6 | 1707.5 | 2227.2 | 2110.4 | 2539.2 | 0.340791362 | 1935    | 2146.075 | 211.075 | 0.901646028 | 0.3585    | -1.103 |
| 103100_at   | 579.2  | 852.8  | 736.8  | 1129.2 | 633.2  | 1005.9 | 761.5  | 1061.2 | 0.799268935 | 824.5   | 865.45   | 40.95   | 0.952683575 | 0.7712    | -1.058 |
| 103101_at   | 426.9  | 384.9  | 434.6  | 398.6  | 470.9  | 388.3  | 482.8  | 394.4  | 0.44924396  | 411.25  | 434.1    | 22.85   | 0.947362359 | 0.4622    | -1.052 |
| 103132_at   | 19     | 23.8   | 22.8   | 29.1   | 7.8    | 28.8   | 22.2   | 30.8   | 0.831330029 | 23.675  | 22.4     | 1.275   | 1.056919643 | 0.6326    | -1.18  |
| 103198_at   | 189.9  | 128.3  | 246.6  | 162.4  | 257.4  | 253.5  | 166.3  | 145.3  | 0.557919855 | 181.8   | 205.625  | 23.825  | 0.884133739 | 0.571     | 1.128  |
| 103199_at   | 51.3   | 47.2   | 65.6   | 65.1   | 93.4   | 68.2   | 88.2   | 74.7   | 0.020414527 | 57.3    | 81.125   | 23.825  | 0.706317411 | 0.01939   | 1.42   |
| 103200_at   | 262.1  | 253.4  | 296.8  | 322.9  | 249    | 239.2  | 237.1  | 271.4  | 0.11888949  | 283.8   | 249.175  | 34.625  | 1.138958563 | 0.09456   | -1.135 |
| 103201_at   | 738.5  | 549.3  | 685.5  | 609.9  | 549.1  | 557.9  | 524.8  | 277.3  | 0.085577741 | 645.8   | 477.275  | 168.525 | 1.353098319 | 0.1144    | -1.397 |
| 103202_at   | 157.3  | 123.1  | 162.5  | 146.3  | 161.7  | 242.7  | 143.6  | 306.8  | 0.176454874 | 147.3   | 213.7    | 66.4    | 0.689284043 | 0.1275    | 1.392  |
| 103203_f_at | 70.4   | 206.2  | 72.9   | 169.6  | 99.3   | 88.8   | 103.1  | 92.3   | 0.39754807  | 129.775 | 95.875   | 33.9    | 1.353585398 | 0.5251    | -1.21  |
| 103204_r_at | 127.8  | 222.3  | 174.9  | 178    | 167.8  | 203.4  | 162.2  | 171.1  | 0.98681028  | 175.75  | 176.125  | 0.375   | 0.99787083  | 0.8947    | -1.017 |
| 103205_at   | 411.7  | 546    | 550.6  | 559    | 607.1  | 549.1  | 612.8  | 624.8  | 0.099334167 | 516.825 | 598.45   | 81.625  | 0.863605982 | 0.1004    | 1.165  |
| 103206_at   | 216    | 203.6  | 177.3  | 182.4  | 224.7  | 210.3  | 226.8  | 204.8  | 0.094706334 | 194.825 | 216.65   | 21.825  | 0.899261482 | 0.08479   | 1.115  |
| 103207_at   | 790.2  | 612.6  | 686.5  | 581.3  | 524.7  | 627.8  | 588.7  | 444.5  | 0.096476451 | 667.65  | 546.425  | 121.225 | 1.221851123 | 0.09477   | -1.224 |
| 103208_at   | 76.5   | 53.5   | 14.5   | 47     | 59.9   | 46.5   | 46     | 34     | 0.931079533 | 47.875  | 46.6     | 1.275   | 1.027360515 | 0.7793    | 1.117  |
| 103209_at   | 112.8  | 170.9  | 145.8  | 170.8  | 128.5  | 197.8  | 126.6  | 85.6   | 0.592971002 | 150.075 | 134.625  | 15.45   | 1.114763231 | 0.5074    | -1.149 |
| 103210_at   | 82.5   | 77.7   | 53     | 116.3  | 66.6   | 62.7   | 63.6   | 88.8   | 0.450840823 | 82.375  | 70.425   | 11.95   | 1.169684061 | 0.5       | -1.138 |
| 103211_at   | 874.4  | 905.7  | 542.1  | 661.8  | 435.1  | 729.4  | 508.9  | 722    | 0.247713665 | 746     | 598.85   | 147.15  | 1.245720965 | 0.2559    | -1.249 |
| 103212_at   | 857.3  | 706.7  | 929.8  | 819.4  | 508.5  | 695.1  | 624.5  | 733.1  | 0.03250424  | 828.3   | 640.3    | 188     | 1.293612369 | 0.03854   | -1.3   |
| 103213_at   | 63.8   | 71.2   | 72.5   | 48.1   | 22.9   | 16.9   | 17.7   | 19.2   | 0.003015298 | 63.9    | 19.175   | 44.725  | 3.332464146 | 0.0000486 | -3.314 |
| 103214_at   | 67.1   | 94.4   | 75.9   | 45.8   | 138.7  | 127.6  | 118.5  | 113.5  | 0.006541218 | 70.8    | 124.575  | 53.775  | 0.56833233  | 0.009259  | 1.813  |
| 103215_g_at | 520.2  | 620    | 526.9  | 540.4  | 922.8  | 746.5  | 799.7  | 695.8  | 0.009711697 | 551.875 | 791.2    | 239.325 | 0.697516431 | 0.002641  | 1.429  |
| 103216_f_at | 336.9  | 268    | 300.9  | 220.7  | 338.3  | 327.6  | 329.7  | 249.9  | 0.392002399 | 281.625 | 311.375  | 29.75   | 0.904456042 | 0.3955    | -1.111 |
| 103217_at   | 193.8  | 175.3  | 152.3  | 246.6  | 151.8  | 217.8  | 153.2  | 229    | 0.892646096 | 192     | 187.95   | 4.05    | 1.021548284 | 0.8797    | -1.024 |
| 103218_at   | 764.7  | 529.1  | 694.1  | 603.8  | 583    | 597.2  | 553    | 719.3  | 0.603676298 | 647.925 | 613.125  | 34.8    | 1.05675841  | 0.6269    | -1.052 |
| 103219_at   | 47.8   | 60.9   | 58.1   | 87.4   | 99.6   | 57.7   | 63     | 87.7   | 0.343897074 | 63.55   | 77       | 13.45   | 0.825324675 | 0.3326    | 1.21   |
| 103220_at   | 414.8  | 618.8  | 526.4  | 581.7  | 376.7  | 644.4  | 575.4  | 559.6  | 0.962058047 | 535.425 | 539.025  | 3.6     | 0.993321275 | 0.9931    | -1.001 |
| 103221_at   | 449.6  | 388.7  | 379.6  | 462.3  | 402.9  | 338.3  | 335.6  | 337.5  | 0.049146396 | 420.05  | 353.575  | 66.475  | 1.188008202 | 0.04279   | -1.187 |
| 103222_at   | 400.8  | 454.9  | 453.4  | 539.6  | 359.5  | 325    | 367.5  | 311.6  | 0.016667018 | 462.175 | 340.9    | 121.275 | 1.355749487 | 0.006107  | -1.351 |
| 103223_at   | 114.7  | 197.8  | 97.1   | 112.2  | 106    | 97     | 84     | 104.4  | 0.249128625 | 130.45  | 97.85    | 32.6    | 1.333163005 | 0.1778    | -1.287 |
| 103224_at   | 137.7  | 58.4   | 110.9  | 112.2  | 132.3  | 140.6  | 134.5  | 156.7  | 0.114490452 | 104.8   | 141.025  | 36.225  | 0.743130651 | 0.1228    | 1.407  |
| 103225_at   | 267.8  | 238    | 265.9  | 264.9  | 257.9  | 245.4  | 221.3  | 272.8  | 0.483792902 | 259.15  | 249.35   | 9.8     | 1.039302186 | 0.4724    | -1.041 |
| 103226_at   | 203.3  | 106.6  | 151.1  | 176.9  | 85.8   | 150.1  | 104.5  | 103.5  | 0.104882572 | 159.475 | 110.975  | 48.5    | 1.437035368 | 0.09743   | -1.428 |
| 103227_at   | 17.2   | 2.9    | 4.7    | 27.9   | 4      | 10.5   | 16.2   | 10     | 0.661276103 | 13.175  | 10.175   | 3       | 1.294840295 | 0.991     | -1.007 |
| 103228_at   | 88.7   | 87.5   | 83.3   | 83.8   | 30.6   | 97     | 70.8   | 88.8   | 0.413419779 | 85.825  | 71.8     | 14.025  | 1.195334262 | 0.3512    | -1.306 |



|             |        |        |        |        |        |        |        |        |             |          |          |         |             |         |        |
|-------------|--------|--------|--------|--------|--------|--------|--------|--------|-------------|----------|----------|---------|-------------|---------|--------|
| 103229_at   | 130.2  | 186.7  | 237.6  | 216.7  | 152.4  | 225.9  | 154.1  | 227    | 0.928426957 | 192.8    | 189.85   | 2.95    | 1.015538583 | 0.9571  | -1.01  |
| 103231_at   | 103    | 77.4   | 110    | 104.2  | 136    | 108.8  | 68.3   | 124.2  | 0.548889894 | 98.65    | 109.325  | 10.675  | 0.902355362 | 0.6618  | -1.082 |
| 103232_at   | 189.8  | 451.2  | 239.6  | 319.3  | 366.1  | 271.2  | 327.9  | 318.6  | 0.746760604 | 299.975  | 320.95   | 20.975  | 0.934647141 | 0.5812  | 1.122  |
| 103233_at   | 154    | 143.9  | 170.4  | 171.9  | 101.5  | 173.8  | 89.1   | 74.8   | 0.102989465 | 160.05   | 109.8    | 50.25   | 1.457650273 | 0.06215 | -1.533 |
| 103234_at   | 123.2  | 115.4  | 151.4  | 137.7  | 132.1  | 200.3  | 175.3  | 176.7  | 0.064284082 | 131.925  | 171.1    | 39.175  | 0.771040327 | 0.05432 | 1.29   |
| 103235_at   | 173.1  | 107.8  | 165.5  | 30.6   | 107.6  | 112.9  | 43.4   | 301.9  | 0.746104782 | 119.25   | 141.45   | 22.2    | 0.843054083 | 0.826   | 1.139  |
| 103236_at   | 62.7   | 114.2  | 98.8   | 127.1  | 109.1  | 138    | 113.6  | 79.9   | 0.624976889 | 100.7    | 110.15   | 9.45    | 0.914207898 | 0.6061  | -1.11  |
| 103237_at   | 337.3  | 459.9  | 381.4  | 266.4  | 391.9  | 354.5  | 283.5  | 293.7  | 0.554373282 | 361.25   | 330.9    | 30.35   | 1.091719553 | 0.5949  | -1.081 |
| 103238_at   | 83.7   | 147.4  | 102.3  | 36.2   | 215.7  | 133    | 130    | 192.8  | 0.053838087 | 92.4     | 167.875  | 75.475  | 0.550409531 | 0.07778 | 1.991  |
| 103239_at   | 9.5    | 9.3    | 14.6   | 5      | 9.1    | 17.5   | 7.2    | 8.5    | 0.760845377 | 9.6      | 10.575   | 0.975   | 0.907801418 | 0.732   | 1.112  |
| 103240_f_at | 78.6   | 90.8   | 83.9   | 94.4   | 99.2   | 85.8   | 88.6   | 60     | 0.716066397 | 86.925   | 83.4     | 3.525   | 1.042266187 | 0.6485  | -1.057 |
| 103241_at   | 942.4  | 1251   | 1070.6 | 843.6  | 989.9  | 1362.6 | 998.7  | 1356.7 | 0.317779117 | 1026.9   | 1176.975 | 150.075 | 0.87249092  | 0.3176  | 1.145  |
| 103242_at   | 862.1  | 698.8  | 694.8  | 762.3  | 441.7  | 772.1  | 609.5  | 438.5  | 0.094255017 | 754.5    | 565.45   | 189.05  | 1.334335485 | 0.07541 | -1.368 |
| 103243_at   | 320.3  | 291    | 552    | 449.6  | 462.6  | 444.6  | 342.7  | 365.5  | 0.992983992 | 403.225  | 403.85   | 0.625   | 0.998452396 | 0.8763  | -1.027 |
| 103244_at   | 192.2  | 229.1  | 239.9  | 182.7  | 438.2  | 280    | 308.9  | 247.2  | 0.077084681 | 210.975  | 318.575  | 107.6   | 0.662245939 | 0.03    | 1.484  |
| 103245_at   | 1966.4 | 1679.3 | 1548   | 1563.2 | 1935.2 | 1907.2 | 1810.4 | 1602.4 | 0.351722306 | 1689.225 | 1813.8   | 124.575 | 0.931318227 | 0.3359  | -1.076 |
| 103247_at   | 168    | 201.9  | 218.1  | 211.7  | 185.8  | 242.8  | 243.2  | 195.4  | 0.409205477 | 199.925  | 216.8    | 16.875  | 0.922163284 | 0.4263  | -1.082 |
| 103248_at   | 393.3  | 385.6  | 287.5  | 356.5  | 425.7  | 618.7  | 430.2  | 435    | 0.076173441 | 355.725  | 477.4    | 121.675 | 0.74512987  | 0.04708 | 1.334  |
| 103249_at   | 14.2   | 22.7   | 27.6   | 18.9   | 33.4   | 22.6   | 33.5   | 21.4   | 0.167611055 | 20.85    | 27.725   | 6.875   | 0.752028855 | 0.1667  | 1.341  |
| 103250_at   | 52.7   | 39.5   | 49.2   | 28.5   | 58.4   | 41.1   | 23.2   | 32.9   | 0.712992884 | 42.475   | 38.9     | 3.575   | 1.091902314 | 0.6399  | -1.125 |
| 103251_at   | 330.2  | 273.3  | 295.9  | 317.5  | 343.9  | 365.7  | 339.1  | 311.3  | 0.077497538 | 304.225  | 340      | 35.775  | 0.894779412 | 0.07971 | -1.119 |
| 103252_at   | 7.8    | 7.5    | 21.2   | 10.5   | 38.3   | 16.1   | 4.6    | 11.2   | 0.506731123 | 11.75    | 17.55    | 5.8     | 0.66951567  | 0.6666  | 1.253  |
| 103253_at   | 9.4    | 40.6   | 15.7   | 9.6    | 20.7   | 15.7   | 27     | 15.2   | 0.922063907 | 18.825   | 19.65    | 0.825   | 0.958015267 | 0.5862  | 1.236  |
| 103254_at   | 428.7  | 447.3  | 423.4  | 365.8  | 433.4  | 581.1  | 464    | 399.3  | 0.284117778 | 416.3    | 469.45   | 53.15   | 0.886782405 | 0.264   | 1.12   |
| 103255_at   | 350.4  | 352    | 299.7  | 325.5  | 338.7  | 333.8  | 351.1  | 413.2  | 0.269516407 | 331.9    | 359.2    | 27.3    | 0.923997773 | 0.2581  | -1.081 |
| 103256_at   | 80.4   | 60     | 76.1   | 86     | 63.4   | 59     | 82     | 99.3   | 0.978941264 | 75.625   | 75.925   | 0.3     | 0.996048732 | 0.9528  | -1.009 |
| 103257_at   | 21.4   | 37     | 32.1   | 35.4   | 30     | 12.9   | 22.3   | 45.4   | 0.643544248 | 31.475   | 27.65    | 3.825   | 1.138336347 | 0.5065  | -1.229 |
| 103258_at   | 29.5   | 43     | 21.5   | 23     | 34.6   | 39.3   | 30.2   | 35     | 0.353543242 | 29.25    | 34.775   | 5.525   | 0.841121495 | 0.2582  | 1.23   |
| 103259_at   | 9.2    | 33.8   | 27.6   | 14.8   | 27.3   | 42.4   | 46.4   | 26.8   | 0.108137864 | 21.35    | 35.725   | 14.375  | 0.597620714 | 0.1153  | 1.833  |
| 103260_at   | 297.7  | 314    | 258.7  | 396.2  | 192.6  | 170    | 212.5  | 267.8  | 0.028082949 | 316.65   | 210.725  | 105.925 | 1.502669356 | 0.02032 | -1.506 |
| 103261_at   | 418.6  | 501.9  | 411.2  | 550.2  | 191.6  | 385.1  | 278.7  | 428.9  | 0.063730353 | 470.475  | 321.075  | 149.4   | 1.465311843 | 0.07382 | -1.524 |
| 103262_at   | 36.6   | 88.4   | 39.5   | 58.3   | 9.1    | 96.6   | 16.5   | 12.1   | 0.404663851 | 55.7     | 33.575   | 22.125  | 1.65897245  | 0.1508  | -2.55  |
| 103263_at   | 868.3  | 1024.5 | 889.1  | 796.2  | 1079.3 | 988.6  | 1057   | 1057.2 | 0.043007002 | 894.525  | 1045.525 | 151     | 0.85557495  | 0.02859 | 1.173  |
| 103264_at   | 109.6  | 107.4  | 191.5  | 112.5  | 112.2  | 114.9  | 118.6  | 160.3  | 0.879248389 | 130.25   | 126.5    | 3.75    | 1.029644269 | 0.961   | -1.008 |
| 103265_r_at | 9.5    | 8.4    | 6.6    | 10.9   | 7.9    | 11.8   | 8.1    | 11.3   | 0.526110962 | 8.85     | 9.775    | 0.925   | 0.905370844 | 0.5488  | -1.101 |
| 103266_at   | 31.1   | 42.8   | 32.8   | 45.2   | 57     | 42.9   | 53.8   | 48.3   | 0.037910953 | 37.975   | 50.5     | 12.525  | 0.751980198 | 0.04075 | 1.34   |
| 103267_i_at | 8.6    | 7      | 12.5   | 15.4   | 13.1   | 9.7    | 7      | 9.5    | 0.663169048 | 10.875   | 9.825    | 1.05    | 1.106870229 | 0.717   | -1.087 |
| 103268_r_at | 74     | 58.8   | 107.6  | 19.2   | 30.6   | 19.9   | 13.3   | 77.5   | 0.25503025  | 64.9     | 35.325   | 29.575  | 1.837225761 | 0.2557  | -1.945 |
| 103269_f_at | 171.9  | 214.4  | 211.3  | 410.7  | 236.8  | 297.1  | 274.3  | 345.7  | 0.566379564 | 252.075  | 288.475  | 36.4    | 0.873819222 | 0.4044  | 1.202  |
| 103270_at   | 371.4  | 373.6  | 340.2  | 375.9  | 486.3  | 336.8  | 313.9  | 357    | 0.847389685 | 365.275  | 373.5    | 8.225   | 0.977978581 | 0.9353  | -1.008 |
| 103271_at   | 19.1   | 42.1   | 40.7   | 27.5   | 38.4   | 18.7   | 6.1    | 51.8   | 0.768942556 | 32.35    | 28.75    | 3.6     | 1.125217391 | 0.5257  | -1.409 |
| 103272_at   | 250.5  | 194.2  | 286.8  | 253.3  | 270.4  | 278.8  | 261.9  | 323.5  | 0.168712994 | 246.2    | 283.65   | 37.45   | 0.867971091 | 0.1672  | 1.16   |
| 103273_s_at | 24.2   | 29.8   | 63     | 50.7   | 53     | 43.7   | 64.3   | 60     | 0.251752789 | 41.925   | 55.25    | 13.325  | 0.758823529 | 0.2066  | 1.403  |
| 103274_at   | 14.9   | 59.8   | 46.8   | 39.7   | 16.6   | 36.8   | 25.2   | 21.8   | 0.213173673 | 40.3     | 25.1     | 15.2    | 1.605577689 | 0.2958  | -1.489 |
| 103275_at   | 186    | 215    | 231.5  | 223    | 176.7  | 225.3  | 200.9  | 229.5  | 0.726416866 | 213.875  | 208.1    | 5.775   | 1.027751081 | 0.715   | -1.03  |
| 103276_at   | 112.2  | 183.4  | 151.3  | 230    | 196.9  | 204.8  | 209.7  | 225.8  | 0.206942273 | 169.225  | 209.3    | 40.075  | 0.808528428 | 0.1641  | 1.278  |
| 103277_s_at | 477.4  | 588.5  | 496.7  | 476.5  | 411.4  | 681.4  | 651.5  | 610.3  | 0.299181652 | 509.775  | 588.65   | 78.875  | 0.866006965 | 0.3444  | 1.138  |
| 103278_at   | 37.4   | 48.3   | 48.2   | 33.7   | 10.7   | 62.4   | 42.7   | 60.9   | 0.866396696 | 41.9     | 44.175   | 2.275   | 0.948500283 | 0.769   | -1.14  |
| 103279_at   | 4.5    | 5.8    | 2.6    | 2.3    | 3.4    | 4.9    | 2.9    | 4.4    | 0.919977185 | 3.8      | 3.9      | 0.1     | 0.974358974 | 0.778   | -1.075 |
| 103281_at   | 320.8  | 221.3  | 271.3  | 355.9  | 229.8  | 294.6  | 224.7  | 198.5  | 0.177997994 | 292.325  | 236.9    | 55.425  | 1.233959477 | 0.1738  | -1.227 |
| 103282_at   | 199.7  | 207.8  | 196.4  | 216.7  | 158.8  | 217.5  | 202    | 206.1  | 0.545562498 | 205.15   | 196.1    | 9.05    | 1.046149924 | 0.5095  | -1.053 |
| 103283_at   | 1.7    | 3.7    | 4.4    | 8.5    | 9.6    | 4.8    | 5.9    | 21.6   | 0.22731108  | 4.575    | 10.475   | 5.9     | 0.436754177 | 0.1386  | 2.238  |
| 103284_at   | 30.8   | 14.4   | 27.9   | 33.7   | 22.3   | 22.4   | 27.4   | 20.3   | 0.473924371 | 26.7     | 23.1     | 3.6     | 1.155844156 | 0.6397  | -1.106 |
| 103285_at   | 180.2  | 165.6  | 132.7  | 255.5  | 234.7  | 177.3  | 195    | 270.6  | 0.324462588 | 183.5    | 219.4    | 35.9    | 0.836371923 | 0.2869  | 1.214  |
| 103286_at   | 362    | 281.5  | 308.2  | 316.2  | 326.9  | 330.7  | 250.5  | 269.2  | 0.423311317 | 316.975  | 294.325  | 22.65   | 1.076955746 | 0.4086  | -1.08  |
| 103288_at   | 715.4  | 693.4  | 551.5  | 790.7  | 679.1  | 731.7  | 595.9  | 925.6  | 0.61901061  | 687.75   | 733.075  | 45.325  | 0.938171401 | 0.639   | -1.061 |



|             |        |        |        |        |        |        |        |        |             |          |          |         |             |            |        |
|-------------|--------|--------|--------|--------|--------|--------|--------|--------|-------------|----------|----------|---------|-------------|------------|--------|
| 103289_at   | 55     | 94.9   | 49.4   | 31.4   | 88.8   | 77.8   | 41.4   | 48.6   | 0.725473763 | 57.675   | 64.15    | 6.475   | 0.899064692 | 0.659      | 1.145  |
| 103291_at   | 255.8  | 181.3  | 241.2  | 216    | 186.2  | 194.1  | 164.4  | 165.9  | 0.059723268 | 223.575  | 177.65   | 45.925  | 1.258513932 | 0.04075    | -1.251 |
| 103292_at   | 64.7   | 70     | 77.6   | 104.7  | 63     | 58.4   | 49.5   | 64.8   | 0.10202088  | 79.25    | 58.925   | 20.325  | 1.344929996 | 0.05791    | -1.329 |
| 103293_at   | 336.5  | 234    | 340.6  | 340.4  | 319.9  | 319    | 281    | 240.8  | 0.511548778 | 312.875  | 290.175  | 22.7    | 1.078228655 | 0.5637     | -1.072 |
| 103294_at   | 289.7  | 250.1  | 295.4  | 328.9  | 312.8  | 272.4  | 219.9  | 348    | 0.934788808 | 291.025  | 288.275  | 2.75    | 1.009539502 | 0.8714     | -1.019 |
| 103295_at   | 573    | 682.5  | 412.6  | 516.7  | 496.4  | 574.5  | 531.9  | 515.7  | 0.793433365 | 546.2    | 529.625  | 16.575  | 1.031295728 | 0.8885     | -1.016 |
| 103296_at   | 4564.7 | 4171   | 4496.3 | 4389.6 | 597.5  | 907.8  | 769.5  | 523.4  | 8.44028E-08 | 4405.4   | 699.55   | 3705.85 | 6.297476949 | 0.00000584 | -6.44  |
| 103297_at   | 49.7   | 37.8   | 21     | 15.3   | 19     | 19.7   | 71.8   | 32.8   | 0.75322769  | 30.95    | 35.825   | 4.875   | 0.863921842 | 0.8254     | -1.099 |
| 103298_at   | 60.5   | 77.6   | 44.3   | 68.6   | 59.7   | 71.7   | 42     | 44     | 0.431185451 | 62.75    | 54.35    | 8.4     | 1.154553818 | 0.4337     | -1.158 |
| 103299_at   | 60.1   | 69.6   | 90.8   | 83.3   | 113.9  | 78.1   | 72.5   | 89.6   | 0.317848436 | 75.95    | 88.525   | 12.575  | 0.857949732 | 0.3099     | 1.162  |
| 103300_at   | 398.3  | 283.7  | 337.6  | 361.3  | 228.6  | 297.1  | 271.5  | 350.8  | 0.147925826 | 345.225  | 287      | 58.225  | 1.202874564 | 0.1494     | -1.208 |
| 103301_i_at | 51.9   | 60.5   | 69.3   | 128.9  | 137.6  | 105.4  | 169.1  | 134.9  | 0.03774571  | 77.65    | 136.75   | 59.1    | 0.567824497 | 0.03184    | 1.854  |
| 103302_r_at | 123.3  | 155.3  | 191.1  | 236.6  | 166.9  | 190.7  | 174.3  | 183.4  | 0.933201627 | 176.575  | 178.825  | 2.25    | 0.987417867 | 0.7865     | -1.041 |
| 103303_at   | 32.8   | 67     | 51.2   | 65.1   | 112.7  | 72.2   | 87.7   | 80.1   | 0.027904475 | 54.025   | 88.175   | 34.15   | 0.612702013 | 0.03573    | 1.673  |
| 103305_at   | 20     | 53     | 20.6   | 27.8   | 26.1   | 77.1   | 22.7   | 59.9   | 0.343155456 | 30.35    | 46.45    | 16.1    | 0.653390743 | 0.3564     | 1.458  |
| 103306_at   | 37.8   | 56.6   | 73     | 67     | 48.3   | 61.5   | 44.4   | 78.1   | 0.962941477 | 58.6     | 58.075   | 0.525   | 1.009040034 | 0.9831     | -1.004 |
| 103308_at   | 864.6  | 572    | 723.6  | 677.3  | 445    | 696.3  | 610.4  | 375.3  | 0.11406958  | 709.375  | 531.75   | 177.625 | 1.334038552 | 0.1131     | -1.359 |
| 103309_at   | 474.4  | 651.5  | 516.6  | 555.6  | 630.6  | 600.5  | 718    | 822    | 0.064888671 | 549.525  | 692.775  | 143.25  | 0.793222908 | 0.05552    | 1.26   |
| 103310_at   | 268.3  | 345.2  | 265.9  | 372.5  | 294    | 303.5  | 309.6  | 344.1  | 0.995506783 | 312.975  | 312.8    | 0.175   | 1.000559463 | 0.9273     | -1.009 |
| 103311_at   | 729.8  | 859.2  | 779.2  | 771.2  | 753.7  | 864.7  | 960.9  | 919    | 0.148192827 | 784.85   | 874.575  | 89.725  | 0.897407312 | 0.1429     | 1.112  |
| 103312_f_at | 835.4  | 662    | 648.7  | 743.4  | 935.9  | 760    | 720.7  | 716    | 0.403289464 | 722.375  | 783.15   | 60.775  | 0.922396731 | 0.3884     | -1.083 |
| 103313_r_at | 13.6   | 32.3   | 22.2   | 34.8   | 23.7   | 33.8   | 28.2   | 21.1   | 0.869224336 | 25.725   | 26.7     | 0.975   | 0.963483146 | 0.7346     | -1.088 |
| 103314_at   | 193.1  | 226.9  | 199.3  | 262.6  | 282.9  | 257    | 219.6  | 186.5  | 0.567970008 | 220.475  | 236.5    | 16.025  | 0.932241015 | 0.5906     | -1.068 |
| 103315_at   | 675.9  | 617.2  | 868.8  | 790.7  | 549.5  | 918.2  | 951.8  | 1099.3 | 0.332511865 | 738.15   | 879.7    | 141.55  | 0.839092873 | 0.4032     | 1.165  |
| 103316_at   | 381.4  | 416.2  | 346.3  | 487.9  | 347.3  | 379.6  | 330.5  | 484.1  | 0.640111428 | 407.95   | 385.375  | 22.575  | 1.058579306 | 0.6096     | -1.062 |
| 103317_at   | 47.3   | 34     | 35.7   | 23.3   | 16.2   | 25.3   | 31.4   | 60     | 0.869687299 | 35.075   | 33.225   | 1.85    | 1.055680963 | 0.6713     | -1.148 |
| 103318_at   | 332.3  | 342.3  | 371.6  | 375.3  | 189.2  | 412.4  | 280.9  | 366    | 0.448440337 | 355.375  | 312.125  | 43.25   | 1.13856628  | 0.3682     | -1.186 |
| 103319_at   | 345.3  | 285.3  | 315.7  | 302.5  | 305.9  | 322.7  | 247.8  | 343.4  | 0.7759183   | 312.2    | 304.95   | 7.25    | 1.023774389 | 0.7399     | -1.029 |
| 103321_at   | 306.7  | 294.5  | 266.9  | 262.2  | 210    | 286.6  | 285.2  | 306.4  | 0.679076576 | 282.575  | 272.05   | 10.525  | 1.038687741 | 0.6372     | -1.047 |
| 103322_at   | 691.9  | 880.2  | 987.7  | 987.4  | 958.7  | 831.6  | 832.2  | 1042.8 | 0.746239274 | 886.8    | 916.325  | 29.525  | 0.967778899 | 0.7185     | -1.039 |
| 103326_at   | 260.8  | 293    | 250.9  | 347.7  | 305    | 358.3  | 332.1  | 327.3  | 0.14902823  | 288.1    | 330.675  | 42.575  | 0.871248204 | 0.1224     | 1.155  |
| 103327_at   | 814.9  | 1024.7 | 1072.1 | 842.7  | 613.1  | 762    | 620.4  | 588.3  | 0.011809225 | 938.6    | 645.95   | 292.65  | 1.453053642 | 0.006113   | -1.45  |
| 103328_at   | 461    | 305.7  | 372.6  | 368.1  | 335.9  | 340.9  | 328.7  | 306.1  | 0.223749608 | 376.85   | 327.9    | 48.95   | 1.149283318 | 0.1888     | -1.138 |
| 103329_at   | 22.4   | 19.8   | 40.3   | 31.7   | 14.6   | 28.1   | 28.9   | 40.8   | 0.951623807 | 28.55    | 28.1     | 0.45    | 1.016014235 | 0.8833     | -1.042 |
| 103330_at   | 483.5  | 594.5  | 510.7  | 719.9  | 556    | 619.9  | 616.6  | 498.4  | 0.944686401 | 577.15   | 572.725  | 4.425   | 1.007726221 | 0.9958     | -1.001 |
| 103331_at   | 26.8   | 96.5   | 36.4   | 66.7   | 114.8  | 70.1   | 83     | 111    | 0.099771163 | 56.6     | 94.725   | 38.125  | 0.597519134 | 0.09602    | 1.853  |
| 103332_at   | 321.3  | 438.1  | 337.5  | 434.8  | 411.5  | 442.6  | 515.1  | 386.9  | 0.227752346 | 382.925  | 439.025  | 56.1    | 0.872216844 | 0.2186     | 1.151  |
| 103333_at   | 124.3  | 148.7  | 142.9  | 139.4  | 120    | 111.6  | 158.2  | 170.9  | 0.934278593 | 138.825  | 140.175  | 1.35    | 0.990369181 | 0.9699     | -1.004 |
| 103334_at   | 274.7  | 338    | 289.7  | 226.1  | 221.5  | 254.4  | 290.7  | 266.1  | 0.418068506 | 282.125  | 258.175  | 23.95   | 1.092766534 | 0.4392     | -1.087 |
| 103335_at   | 532    | 496.4  | 541.2  | 650.1  | 762.3  | 477.9  | 638.5  | 754.2  | 0.230237358 | 554.925  | 658.225  | 103.3   | 0.843062782 | 0.2447     | 1.172  |
| 103336_r_at | 2.4    | 7.9    | 2      | 7.1    | 6.7    | 2.8    | 2.1    | 1      | 0.424491802 | 4.85     | 3.15     | 1.7     | 1.53968254  | 0.4124     | -1.589 |
| 103338_at   | 154.3  | 147.5  | 151.6  | 136    | 238.1  | 198.4  | 191.6  | 162.7  | 0.043597353 | 147.35   | 197.7    | 50.35   | 0.745321194 | 0.01362    | 1.331  |
| 103340_at   | 136    | 137.8  | 129.7  | 155.1  | 112.1  | 139.5  | 134.8  | 151.3  | 0.617529234 | 139.65   | 134.425  | 5.225   | 1.038869258 | 0.5916     | -1.043 |
| 103341_at   | 2563.3 | 2375.2 | 2513.2 | 2237.8 | 1895.2 | 2354.6 | 2358.9 | 2295.5 | 0.198374688 | 2422.375 | 2226.05  | 196.325 | 1.088194335 | 0.2023     | -1.091 |
| 103342_at   | 742.7  | 630.6  | 688.8  | 806.9  | 527.5  | 695.3  | 671.2  | 856.2  | 0.716965071 | 717.25   | 687.55   | 29.7    | 1.043196858 | 0.6548     | -1.054 |
| 103343_at   | 96.4   | 153.7  | 120.9  | 128    | 103.8  | 109.1  | 119.8  | 105.6  | 0.293335187 | 124.75   | 109.575  | 15.175  | 1.138489619 | 0.2882     | -1.125 |
| 103344_at   | 369    | 350    | 344.7  | 416.4  | 480.9  | 409.4  | 439.6  | 357.8  | 0.150247653 | 370.025  | 421.925  | 51.9    | 0.876992356 | 0.1413     | 1.137  |
| 103345_at   | 2951.5 | 2443.8 | 2516.1 | 2707.5 | 1920.1 | 2413.8 | 2264.4 | 2560   | 0.08774056  | 2654.725 | 2289.575 | 365.15  | 1.159483747 | 0.09096    | -1.163 |
| 103346_at   | 506.6  | 819.7  | 832.6  | 811.6  | 656.5  | 887.4  | 651.8  | 717.1  | 0.886224231 | 742.625  | 728.2    | 14.425  | 1.019809118 | 0.9591     | -1.008 |
| 103347_at   | 268.1  | 390.5  | 315.9  | 367    | 300.6  | 319.4  | 258.4  | 435.3  | 0.886942108 | 335.375  | 328.425  | 6.95    | 1.021161605 | 0.8393     | -1.03  |
| 103348_at   | 560.6  | 691.9  | 634    | 468.9  | 568.5  | 623.3  | 588.1  | 693    | 0.619810546 | 588.85   | 618.225  | 29.375  | 0.952484937 | 0.575      | -1.058 |
| 103349_at   | 65.8   | 58.7   | 85.1   | 69.7   | 79.3   | 90.5   | 80.9   | 109.6  | 0.065751158 | 69.825   | 90.075   | 20.25   | 0.775187344 | 0.05545    | 1.29   |
| 103350_at   | 3183.1 | 2836.8 | 3758.6 | 2766.6 | 3020.6 | 2667.8 | 2991.8 | 2115.9 | 0.207096374 | 3136.275 | 2699.025 | 437.25  | 1.162002946 | 0.2086     | -1.165 |
| 103352_at   | 624.1  | 483.3  | 530.6  | 677.4  | 392.3  | 540.9  | 570.9  | 524.1  | 0.270474307 | 578.85   | 507.05   | 71.8    | 1.141603392 | 0.2837     | -1.143 |
| 103353_f_at | 221.5  | 174.4  | 180.9  | 220.2  | 219.9  | 198.6  | 238.4  | 258    | 0.149817448 | 199.25   | 228.725  | 29.475  | 0.871133457 | 0.1505     | 1.149  |
| 103354_at   | 870.7  | 822.9  | 838.6  | 873.4  | 677.7  | 683.7  | 722.1  | 990.4  | 0.349299775 | 851.4    | 768.475  | 82.925  | 1.10790852  | 0.2536     | -1.122 |



|             |        |        |        |        |        |        |        |        |             |          |          |         |             |          |        |
|-------------|--------|--------|--------|--------|--------|--------|--------|--------|-------------|----------|----------|---------|-------------|----------|--------|
| 103355_at   | 3.5    | 9.5    | 12.4   | 10     | 11.9   | 30     | 58.8   | 6.5    | 0.225502098 | 8.85     | 26.8     | 17.95   | 0.330223881 | 0.1736   | 2.393  |
| 103356_at   | 165.4  | 190.5  | 149.1  | 170.2  | 164.6  | 154    | 154.2  | 146.2  | 0.204129612 | 168.8    | 154.75   | 14.05   | 1.090791599 | 0.1831   | -1.088 |
| 103357_at   | 28.9   | 21.9   | 23.9   | 34.1   | 17.2   | 26     | 3.7    | 22.7   | 0.145602411 | 27.2     | 17.4     | 9.8     | 1.563218391 | 0.2057   | -1.919 |
| 103359_at   | 410.9  | 297    | 423.5  | 347.5  | 306.6  | 382.2  | 359.1  | 270.3  | 0.341066869 | 369.725  | 329.55   | 40.175  | 1.121908663 | 0.3532   | -1.121 |
| 103360_at   | 9.4    | 10.9   | 11.7   | 16.1   | 12.6   | 12.1   | 18.3   | 10.8   | 0.541190175 | 12.025   | 13.45    | 1.425   | 0.894052045 | 0.5125   | -1.119 |
| 103361_at   | 46.3   | 29     | 39.7   | 45.2   | 36.5   | 48.7   | 35.2   | 41.3   | 0.942780988 | 40.05    | 40.425   | 0.375   | 0.990723562 | 0.9      | -1.017 |
| 103362_at   | 23.3   | 44.3   | 53.4   | 21.5   | 9.8    | 9.8    | 60.1   | 32.9   | 0.623104441 | 35.625   | 28.15    | 7.475   | 1.265541741 | 0.4018   | -1.581 |
| 103363_at   | 304.8  | 319.3  | 346.5  | 314.7  | 318.2  | 371.7  | 297.5  | 447.6  | 0.350326323 | 321.325  | 358.75   | 37.425  | 0.895679443 | 0.3381   | -1.104 |
| 103364_f_at | 501.6  | 676.3  | 695.6  | 938.3  | 851.2  | 790.8  | 790.2  | 908.8  | 0.240219879 | 702.95   | 835.25   | 132.3   | 0.84160431  | 0.1906   | 1.216  |
| 103365_s_at | 8.1    | 12.7   | 5.8    | 5      | 10.1   | 7      | 6.3    | 5.9    | 0.783392742 | 7.9      | 7.325    | 0.575   | 1.078498294 | 0.8889   | -1.035 |
| 103366_at   | 102.6  | 159.6  | 137.1  | 180.2  | 159.6  | 140.1  | 198.7  | 179.9  | 0.28471745  | 144.875  | 169.575  | 24.7    | 0.854341737 | 0.2794   | 1.185  |
| 103367_at   | 11.5   | 20.3   | 13.8   | 42.3   | 7.9    | 38.5   | 14.3   | 10.7   | 0.692090137 | 21.975   | 17.85    | 4.125   | 1.231092437 | 0.5697   | -1.31  |
| 103369_at   | 200.7  | 277.2  | 149.4  | 179.8  | 211    | 261.4  | 201.2  | 251.8  | 0.387660322 | 201.775  | 231.35   | 29.575  | 0.872163389 | 0.3214   | 1.169  |
| 103370_at   | 1664.4 | 1139.7 | 1197.2 | 1504.2 | 983.6  | 1357.7 | 1152.2 | 1626.6 | 0.624246864 | 1376.375 | 1280.025 | 96.35   | 1.075271967 | 0.601    | -1.081 |
| 103371_at   | 1321.6 | 1765.3 | 1753.2 | 1948.2 | 1821   | 1828.2 | 2099.1 | 2072.8 | 0.155015377 | 1697.075 | 1955.275 | 258.2   | 0.867946964 | 0.156    | 1.161  |
| 103372_at   | 11.8   | 11     | 14.5   | 14.8   | 15.7   | 9.1    | 13.6   | 14.8   | 0.880966525 | 13.025   | 13.3     | 0.275   | 0.979323308 | 0.9712   | -1.005 |
| 103374_at   | 32     | 11.3   | 47.3   | 53.9   | 76.8   | 55     | 24.9   | 29.9   | 0.518380551 | 36.125   | 46.65    | 10.525  | 0.774383708 | 0.5128   | 1.358  |
| 103375_at   | 205.1  | 324.9  | 223.6  | 290.1  | 223.8  | 298.8  | 297.7  | 341.9  | 0.457448412 | 260.925  | 290.55   | 29.625  | 0.898038203 | 0.4484   | -1.12  |
| 103376_s_at | 47.7   | 119    | 93     | 20.2   | 115.2  | 110    | 101.7  | 126.6  | 0.143811549 | 69.975   | 113.375  | 43.4    | 0.617199559 | 0.1385   | 1.979  |
| 103377_at   | 51.3   | 42.8   | 58.6   | 72.4   | 54.4   | 71.5   | 75.9   | 95.5   | 0.141100181 | 56.275   | 74.325   | 18.05   | 0.757147662 | 0.134    | 1.319  |
| 103378_at   | 9.3    | 5.1    | 8      | 6.6    | 34.6   | 23.4   | 40.1   | 8.6    | 0.067027266 | 7.25     | 26.675   | 19.425  | 0.271790066 | 0.01869  | 3.261  |
| 103379_at   | 717.5  | 626.4  | 606.2  | 705.1  | 460.8  | 646.9  | 544.3  | 730.5  | 0.350869957 | 663.8    | 595.625  | 68.175  | 1.114459601 | 0.3106   | -1.128 |
| 103381_at   | 1311   | 1582.1 | 1208.1 | 1684.2 | 1317.8 | 1696.6 | 1709.2 | 1799.3 | 0.278220647 | 1446.35  | 1630.725 | 184.375 | 0.886936792 | 0.2884   | 1.13   |
| 103384_at   | 46.2   | 13.6   | 10.9   | 24.8   | 17     | 17.3   | 44.4   | 10.8   | 0.895833386 | 23.875   | 22.375   | 1.5     | 1.067039106 | 0.9172   | -1.049 |
| 103385_at   | 1005.5 | 770.5  | 981.8  | 1142.6 | 675.5  | 868.5  | 597.8  | 925    | 0.104997201 | 975.1    | 766.7    | 208.4   | 1.271814269 | 0.1112   | -1.279 |
| 103386_at   | 160.4  | 105.5  | 123.7  | 130.5  | 195.9  | 157.5  | 118.6  | 113.6  | 0.497112958 | 130.025  | 146.4    | 16.375  | 0.888148907 | 0.5217   | 1.111  |
| 103387_at   | 446.4  | 433    | 411.9  | 477.5  | 505.1  | 427.8  | 420.8  | 417    | 0.985572587 | 442.2    | 442.675  | 0.475   | 0.998926978 | 0.9901   | -1.001 |
| 103388_at   | 474.1  | 588.3  | 716.3  | 612.8  | 534    | 641.1  | 535.1  | 573.8  | 0.652329969 | 597.875  | 571      | 26.875  | 1.04706655  | 0.7032   | -1.039 |
| 103389_at   | 340    | 328.9  | 357.9  | 442    | 253    | 194.5  | 210    | 137.5  | 0.003016434 | 367.2    | 198.75   | 168.45  | 1.84754717  | 0.004652 | -1.879 |
| 103391_at   | 196.9  | 156.9  | 171.5  | 100.8  | 193.6  | 175.1  | 198.8  | 170.6  | 0.26767894  | 156.525  | 184.525  | 28      | 0.848259043 | 0.2469   | 1.211  |
| 103392_at   | 1163.2 | 1673.2 | 1384   | 1836.8 | 925.7  | 1084.3 | 1259.3 | 1295.3 | 0.085547496 | 1514.3   | 1141.15  | 373.15  | 1.326994698 | 0.07363  | -1.319 |
| 103393_at   | 440.6  | 570.3  | 620.2  | 428.4  | 479.6  | 641.4  | 485.2  | 290.9  | 0.656166857 | 514.875  | 474.275  | 40.6    | 1.085604343 | 0.5895   | -1.114 |
| 103394_at   | 254.7  | 252    | 193.7  | 232.8  | 226.5  | 310.8  | 332.7  | 229    | 0.243846617 | 233.3    | 274.75   | 41.45   | 0.849135578 | 0.2422   | 1.167  |
| 103395_at   | 10.7   | 24.8   | 21.2   | 15.2   | 19.2   | 25.9   | 11.1   | 17     | 0.9432016   | 17.975   | 18.3     | 0.325   | 0.982240437 | 0.9213   | -1.027 |
| 103397_at   | 532.9  | 491.3  | 471.5  | 431.1  | 454.4  | 455.2  | 388.8  | 394.7  | 0.082532055 | 481.7    | 423.275  | 58.425  | 1.138030831 | 0.08116  | -1.138 |
| 103398_at   | 236.9  | 328.1  | 228.2  | 319.8  | 273.5  | 295.6  | 353.1  | 303.2  | 0.41096942  | 278.25   | 306.35   | 28.1    | 0.908274849 | 0.3739   | 1.112  |
| 103399_at   | 504.3  | 673.2  | 662.6  | 659.5  | 457.3  | 575    | 511.7  | 582.5  | 0.115355389 | 624.9    | 531.625  | 93.275  | 1.175452622 | 0.125    | -1.173 |
| 103400_at   | 1115.2 | 1140.4 | 1034.5 | 1118.7 | 1131.9 | 1128.5 | 1182.5 | 1046.5 | 0.601505736 | 1102.2   | 1122.35  | 20.15   | 0.982046599 | 0.6113   | -1.018 |
| 103401_at   | 161.8  | 443.7  | 333.1  | 413.6  | 410.3  | 392    | 470.1  | 305.2  | 0.47109214  | 338.05   | 394.4    | 56.35   | 0.857124746 | 0.4252   | 1.236  |
| 103402_at   | 755.4  | 985.7  | 864    | 972    | 607    | 1149.5 | 1044   | 1062.9 | 0.618493424 | 894.275  | 965.85   | 71.575  | 0.92589429  | 0.7488   | -1.055 |
| 103403_at   | 101.9  | 123.7  | 99.3   | 152.6  | 187.8  | 130.8  | 80.7   | 143.3  | 0.54927426  | 119.375  | 135.65   | 16.275  | 0.880022116 | 0.6414   | 1.104  |
| 103404_at   | 594.5  | 695.7  | 757.1  | 682.6  | 516.8  | 649.4  | 689.1  | 837.8  | 0.906579334 | 682.475  | 673.275  | 9.2     | 1.01366455  | 0.8326   | -1.025 |
| 103405_at   | 267.2  | 318.3  | 270.8  | 293.3  | 283.8  | 273.3  | 214.9  | 391.9  | 0.931368462 | 287.4    | 290.975  | 3.575   | 0.987713721 | 0.9507   | -1.008 |
| 103406_at   | 1402.6 | 1093.5 | 1348.3 | 1197.9 | 993.9  | 1302.8 | 1205.9 | 1174.3 | 0.376456397 | 1260.575 | 1169.225 | 91.35   | 1.078128675 | 0.3857   | -1.078 |
| 103407_at   | 13     | 10     | 4.8    | 6.8    | 7      | 10.3   | 7.4    | 45.4   | 0.414445494 | 8.65     | 17.525   | 8.875   | 0.493580599 | 0.41     | 1.545  |
| 103408_at   | 102.5  | 181.5  | 135.1  | 137.2  | 237.4  | 121.8  | 168.6  | 195.8  | 0.208616915 | 139.075  | 180.9    | 41.825  | 0.768794914 | 0.2133   | 1.29   |
| 103409_at   | 106.1  | 147.4  | 75.1   | 79.1   | 135.7  | 111    | 110.2  | 106.3  | 0.483192373 | 101.925  | 115.8    | 13.875  | 0.880181347 | 0.3685   | 1.174  |
| 103411_at   | 165.4  | 289.4  | 261.4  | 68.4   | 283.9  | 284.5  | 260.7  | 283.2  | 0.200948441 | 196.15   | 278.075  | 81.925  | 0.705385238 | 0.1912   | 1.625  |
| 103412_at   | 145    | 146.2  | 117    | 137.1  | 146.9  | 143.2  | 133.9  | 137.8  | 0.603593568 | 136.325  | 140.45   | 4.125   | 0.970630117 | 0.5731   | -1.034 |
| 103413_at   | 769.4  | 537.4  | 683.6  | 575.8  | 406.2  | 653.9  | 524.3  | 506.3  | 0.155680778 | 641.55   | 522.675  | 118.875 | 1.227435787 | 0.1508   | -1.233 |
| 103414_at   | 289.3  | 401.7  | 327.1  | 378    | 352.9  | 328.9  | 345.7  | 466.9  | 0.566170851 | 349.025  | 373.6    | 24.575  | 0.934221092 | 0.5624   | -1.068 |
| 103415_at   | 584    | 651.6  | 514.8  | 545    | 551.7  | 554.6  | 460.3  | 484.1  | 0.160509514 | 573.85   | 512.675  | 61.175  | 1.119325108 | 0.1557   | -1.119 |
| 103416_at   | 2566.1 | 2129.3 | 2223.7 | 2382.5 | 1384.9 | 2172.5 | 1934.5 | 1898.9 | 0.05683092  | 2325.4   | 1847.7   | 477.7   | 1.258537641 | 0.06118  | -1.272 |
| 103418_at   | 1094.6 | 740.1  | 837.2  | 1009   | 740.1  | 630.9  | 702.7  | 783    | 0.077145725 | 920.225  | 714.175  | 206.05  | 1.28851472  | 0.04965  | -1.278 |
| 103420_at   | 914.1  | 808.2  | 915.9  | 737.9  | 886.5  | 1074.2 | 950.9  | 1078.2 | 0.05443889  | 844.025  | 997.45   | 153.425 | 0.846182766 | 0.05641  | 1.183  |
| 103421_at   | 99.8   | 129.2  | 85.5   | 112.7  | 146.1  | 165.4  | 162.3  | 152.7  | 0.00705112  | 106.8    | 156.625  | 49.825  | 0.68188348  | 0.005321 | 1.482  |



|             |        |        |        |        |        |        |        |        |             |          |          |         |             |          |        |
|-------------|--------|--------|--------|--------|--------|--------|--------|--------|-------------|----------|----------|---------|-------------|----------|--------|
| 103422_at   | 220.6  | 222.3  | 226.4  | 245.8  | 259.9  | 394.3  | 286.5  | 345.4  | 0.05163428  | 228.775  | 321.525  | 92.75   | 0.711530985 | 0.01456  | 1.388  |
| 103423_at   | 688.3  | 593.9  | 732.6  | 764.9  | 636.5  | 1003   | 965.6  | 721.9  | 0.233193031 | 694.925  | 831.75   | 136.825 | 0.835497445 | 0.229    | 1.181  |
| 103424_at   | 269.6  | 326.7  | 248.1  | 277.3  | 99.2   | 196.3  | 173.6  | 125.9  | 0.003795699 | 280.425  | 148.75   | 131.675 | 1.885210084 | 0.006983 | -1.943 |
| 103427_at   | 289.6  | 251.4  | 215.8  | 330.3  | 324.8  | 306.3  | 329.5  | 334.9  | 0.122523839 | 271.775  | 323.875  | 52.1    | 0.839135469 | 0.09237  | 1.206  |
| 103428_at   | 796.2  | 740.6  | 834.9  | 709.2  | 664.3  | 746.6  | 692    | 838.2  | 0.492155575 | 770.225  | 735.275  | 34.95   | 1.047533236 | 0.4699   | -1.05  |
| 103429_i_at | 169.9  | 235.6  | 214.3  | 235.6  | 129.5  | 235.1  | 171.3  | 260    | 0.677847457 | 213.85   | 198.975  | 14.875  | 1.074758135 | 0.5916   | -1.105 |
| 103430_at   | 66.8   | 161    | 88     | 121.2  | 113.4  | 139    | 103.3  | 121    | 0.675144076 | 109.25   | 119.175  | 9.925   | 0.916719111 | 0.527    | 1.144  |
| 103432_at   | 13.9   | 14.5   | 14.6   | 13     | 14.3   | 11.4   | 7.7    | 15.5   | 0.385487574 | 14       | 12.225   | 1.775   | 1.145194274 | 0.3238   | -1.186 |
| 103433_at   | 1223.8 | 1312.6 | 1373.5 | 1244.8 | 1102.8 | 1313.8 | 1225.7 | 1097.6 | 0.154922928 | 1288.675 | 1184.975 | 103.7   | 1.087512395 | 0.1429   | -1.09  |
| 103434_at   | 397.2  | 372.6  | 388.7  | 383.6  | 291.8  | 425.7  | 233.8  | 235.4  | 0.142728067 | 385.525  | 296.675  | 88.85   | 1.299485969 | 0.08337  | -1.34  |
| 103435_at   | 1048.8 | 1732.3 | 1201.3 | 1332.3 | 1435.2 | 1316.1 | 1489.9 | 1502.2 | 0.526126363 | 1328.675 | 1435.85  | 107.175 | 0.925357802 | 0.4294   | 1.098  |
| 103436_at   | 511.7  | 484.3  | 497.4  | 512.8  | 395.6  | 490.7  | 452.5  | 497.5  | 0.165813196 | 501.55   | 459.075  | 42.475  | 1.092523008 | 0.1403   | -1.097 |
| 103437_at   | 89.4   | 44.4   | 46.4   | 49.1   | 34.1   | 86.2   | 43.1   | 32.9   | 0.63610093  | 57.325   | 49.075   | 8.25    | 1.168110036 | 0.5116   | -1.213 |
| 103438_at   | 40.3   | 46.2   | 27.3   | 61.6   | 101.8  | 53.6   | 53.7   | 63.5   | 0.131212049 | 43.85    | 68.15    | 24.3    | 0.643433602 | 0.09712  | 1.562  |
| 103439_at   | 462.3  | 589.4  | 604.7  | 658.1  | 684.4  | 462.3  | 651.9  | 777.6  | 0.440107967 | 578.625  | 644.05   | 65.425  | 0.898416272 | 0.4943   | -1.103 |
| 103440_at   | 790.1  | 737.1  | 734.4  | 773.9  | 578.2  | 796.7  | 713.8  | 528.4  | 0.187489594 | 758.875  | 654.275  | 104.6   | 1.159871614 | 0.1441   | -1.175 |
| 103441_at   | 491.1  | 371.2  | 381.3  | 469.5  | 359.8  | 398    | 431.2  | 357.9  | 0.291797051 | 428.275  | 386.725  | 41.55   | 1.107440688 | 0.2906   | -1.102 |
| 103442_at   | 879.6  | 759.3  | 697.4  | 729.5  | 797.9  | 654.4  | 667.4  | 882.9  | 0.823787267 | 766.45   | 750.65   | 15.8    | 1.021048425 | 0.7874   | -1.025 |
| 103443_at   | 130.5  | 164    | 112    | 135.1  | 123.3  | 137.5  | 128.8  | 196.7  | 0.601620638 | 135.4    | 146.575  | 11.175  | 0.923759168 | 0.6121   | -1.073 |
| 103444_at   | 196.2  | 166.6  | 183.6  | 190.7  | 176.6  | 248.5  | 200.7  | 135    | 0.82303742  | 184.275  | 190.2    | 5.925   | 0.96884858  | 0.9455   | -1.009 |
| 103445_at   | 159.3  | 118.2  | 177.5  | 225.4  | 156.8  | 172.9  | 153.4  | 158.8  | 0.697381356 | 170.1    | 160.475  | 9.625   | 1.05997819  | 0.8179   | -1.033 |
| 103446_at   | 100.5  | 87.8   | 69.3   | 90.8   | 88.5   | 109.6  | 110.8  | 139.1  | 0.097493598 | 87.1     | 112      | 24.9    | 0.777678571 | 0.0872   | 1.281  |
| 103447_at   | 545.1  | 600.9  | 652.8  | 606.1  | 678.6  | 447.5  | 621.8  | 667.9  | 0.964752362 | 601.225  | 603.95   | 2.725   | 0.995488037 | 0.9504   | -1.007 |
| 103448_at   | 678    | 356.8  | 353.9  | 246.5  | 998.2  | 474.6  | 392.4  | 987.5  | 0.167601882 | 408.8    | 713.175  | 304.375 | 0.573211344 | 0.1441   | 1.717  |
| 103449_at   | 540.1  | 952.3  | 540.6  | 614    | 889.3  | 909    | 746.4  | 678.3  | 0.261798925 | 661.75   | 805.75   | 144     | 0.821284518 | 0.1999   | 1.244  |
| 103450_at   | 183    | 211.7  | 210.6  | 162.9  | 226    | 206.5  | 222.3  | 196.2  | 0.191890289 | 192.05   | 212.75   | 20.7    | 0.902702703 | 0.1833   | -1.112 |
| 103451_at   | 138.4  | 134.5  | 124    | 148.8  | 150.3  | 171.8  | 211.7  | 228.5  | 0.05193614  | 136.425  | 190.575  | 54.15   | 0.715859898 | 0.02027  | 1.381  |
| 103452_at   | 13.5   | 27.1   | 17.3   | 15.3   | 18.4   | 35.5   | 53.1   | 7.7    | 0.381682143 | 18.3     | 28.675   | 10.375  | 0.638186574 | 0.5918   | 1.289  |
| 103454_at   | 77.9   | 69.7   | 59     | 68.3   | 92.6   | 64.1   | 65     | 58.1   | 0.893255951 | 68.725   | 69.95    | 1.225   | 0.982487491 | 0.9605   | -1.006 |
| 103455_at   | 38.5   | 74.9   | 90.6   | 96.3   | 75.4   | 100.5  | 65.6   | 76.3   | 0.782434785 | 75.075   | 79.45    | 4.375   | 0.944933921 | 0.6675   | 1.109  |
| 103456_at   | 722.1  | 793.8  | 922.5  | 899.6  | 541    | 1026   | 600.5  | 984.5  | 0.74813408  | 834.5    | 788      | 46.5    | 1.059010152 | 0.6147   | -1.097 |
| 103457_at   | 1800.4 | 1496.7 | 1441.8 | 1636   | 1590.9 | 1729.6 | 1635.3 | 1825.4 | 0.335086727 | 1593.725 | 1695.3   | 101.575 | 0.940084351 | 0.3132   | -1.066 |
| 103458_at   | 22     | 33.5   | 23.3   | 27.4   | 23.7   | 8      | 10.5   | 45.3   | 0.63113748  | 26.55    | 21.875   | 4.675   | 1.213714286 | 0.3489   | -1.51  |
| 103459_at   | 1010.5 | 986.1  | 883    | 1147.1 | 535.9  | 840.6  | 779.8  | 589.4  | 0.014515073 | 1006.675 | 686.425  | 320.25  | 1.466547693 | 0.01689  | -1.486 |
| 103460_at   | 887.2  | 1368.2 | 1136.4 | 1592.8 | 1176.5 | 1247.2 | 1132.1 | 849.3  | 0.446924954 | 1246.15  | 1101.275 | 144.875 | 1.131552065 | 0.4945   | -1.117 |
| 103462_at   | 43.3   | 32.9   | 49.1   | 26.5   | 2.2    | 42.9   | 43.4   | 55.6   | 0.886776549 | 37.95    | 36.025   | 1.925   | 1.053435115 | 0.5268   | -1.684 |
| 103463_at   | 6.7    | 3.7    | 17     | 24     | 5.4    | 4.2    | 4.2    | 30.7   | 0.837854605 | 12.85    | 11.125   | 1.725   | 1.15505618  | 0.6492   | -1.361 |
| 103465_f_at | 75     | 43.6   | 119.5  | 103.1  | 192.7  | 140.1  | 183    | 75.4   | 0.10348702  | 85.3     | 147.8    | 62.5    | 0.577131258 | 0.1232   | 1.744  |
| 103466_at   | 270.7  | 225.9  | 308.6  | 269.2  | 390.4  | 314.7  | 354.3  | 392.8  | 0.009252625 | 268.6    | 363.05   | 94.45   | 0.739842997 | 0.01034  | 1.355  |
| 103467_g_at | 347    | 509.3  | 444.5  | 348.4  | 701.5  | 490.5  | 528.3  | 584.6  | 0.036323577 | 412.3    | 576.225  | 163.925 | 0.715519111 | 0.03238  | 1.404  |
| 103468_at   | 442.7  | 263.1  | 432    | 368.3  | 201.4  | 330.6  | 339.9  | 324.1  | 0.19354049  | 376.525  | 299      | 77.525  | 1.259280936 | 0.2291   | -1.261 |
| 103469_at   | 5.1    | 8.7    | 9.3    | 24.8   | 47.3   | 6.3    | 7.6    | 7.2    | 0.664420415 | 11.975   | 17.1     | 5.125   | 0.700292398 | 0.8457   | 1.125  |
| 103470_at   | 20.1   | 8.8    | 28.8   | 10.5   | 7.2    | 18.4   | 17     | 12.4   | 0.561796802 | 17.05    | 13.75    | 3.3     | 1.24        | 0.6583   | -1.177 |
| 103471_at   | 977.3  | 914    | 884.2  | 749.1  | 748.3  | 797.5  | 539.3  | 747.5  | 0.061772438 | 881.15   | 708.15   | 173     | 1.244298524 | 0.07568  | -1.252 |
| 103472_at   | 2.7    | 1.9    | 1.9    | 2.6    | 1.2    | 2.2    | 2.5    | 2.8    | 0.81682844  | 2.275    | 2.175    | 0.1     | 1.045977011 | 0.6957   | -1.091 |
| 103473_at   | 196.9  | 166.7  | 140.1  | 176.8  | 232.3  | 218.7  | 187.1  | 274.7  | 0.04247927  | 170.125  | 228.2    | 58.075  | 0.745508326 | 0.03385  | 1.339  |
| 103475_s_at | 229.6  | 162.9  | 250.3  | 209.2  | 128.8  | 170.1  | 118.6  | 108.4  | 0.014375273 | 213      | 131.475  | 81.525  | 1.620079863 | 0.01132  | -1.624 |
| 103476_at   | 91.2   | 90.6   | 102.2  | 117.1  | 94.5   | 109.8  | 88     | 123    | 0.735730307 | 100.275  | 103.825  | 3.55    | 0.96580785  | 0.7525   | -1.032 |
| 103477_at   | 15.3   | 23.3   | 18.6   | 27     | 49.2   | 15.5   | 27.9   | 37.4   | 0.210562714 | 21.05    | 32.5     | 11.45   | 0.647692308 | 0.2268   | 1.452  |
| 103478_at   | 128.4  | 149.3  | 154.5  | 220.3  | 96.6   | 169.8  | 129.1  | 134.8  | 0.269020088 | 163.125  | 132.575  | 30.55   | 1.230435602 | 0.2507   | -1.23  |
| 103479_at   | 349.3  | 357.9  | 402.9  | 353.5  | 355.2  | 397    | 446.4  | 339.7  | 0.522327034 | 365.9    | 384.575  | 18.675  | 0.951439901 | 0.5349   | -1.047 |
| 103480_at   | 124    | 120.1  | 134.3  | 150.1  | 131.2  | 168.9  | 125.6  | 138.4  | 0.480832168 | 132.125  | 141.025  | 8.9     | 0.936890622 | 0.4783   | -1.064 |
| 103481_at   | 1013.7 | 775.7  | 987.3  | 959.8  | 1075.2 | 837.3  | 1009.5 | 843    | 0.932475131 | 934.125  | 941.25   | 7.125   | 0.992430279 | 0.9398   | -1.007 |
| 103483_at   | 343.1  | 256.2  | 322.1  | 293.5  | 301.5  | 287    | 240.7  | 246.6  | 0.200587345 | 303.725  | 268.95   | 34.775  | 1.129299126 | 0.2033   | -1.128 |
| 103484_at   | 22.5   | 27.6   | 41.6   | 16.7   | 28.2   | 16.3   | 7.7    | 59.6   | 0.949028878 | 27.1     | 27.95    | 0.85    | 0.969588551 | 0.7195   | -1.195 |
| 103485_at   | 187.8  | 185.6  | 172.8  | 229.6  | 154.5  | 238.3  | 179    | 301.8  | 0.526428323 | 193.95   | 218.4    | 24.45   | 0.888049451 | 0.5931   | -1.095 |



|             |        |        |        |        |        |        |        |        |             |          |         |         |             |          |        |
|-------------|--------|--------|--------|--------|--------|--------|--------|--------|-------------|----------|---------|---------|-------------|----------|--------|
| 103486_at   | 9.2    | 10.3   | 9      | 12.8   | 9      | 12     | 24.3   | 11     | 0.363138593 | 10.325   | 14.075  | 3.75    | 0.73357016  | 0.3325   | 1.274  |
| 103487_at   | 392.6  | 472.5  | 443.5  | 345.6  | 458.9  | 593.6  | 448.1  | 504.1  | 0.091206271 | 413.55   | 501.175 | 87.625  | 0.825160872 | 0.08619  | 1.213  |
| 103488_at   | 192.6  | 141.7  | 213.8  | 162.9  | 242.9  | 224.1  | 224.6  | 216.6  | 0.047011397 | 177.75   | 227.05  | 49.3    | 0.78286721  | 0.03441  | 1.292  |
| 103489_at   | 75.9   | 100.4  | 124    | 109.9  | 85.8   | 75.5   | 57.1   | 91.4   | 0.097767449 | 102.55   | 77.45   | 25.1    | 1.324080052 | 0.1053   | -1.324 |
| 103490_at   | 14.9   | 12.2   | 9.7    | 12.5   | 30.9   | 28.1   | 15.7   | 61.7   | 0.111547844 | 12.325   | 34.1    | 21.775  | 0.36143695  | 0.02132  | 2.485  |
| 103491_at   | 183.8  | 252    | 191.2  | 212    | 203.2  | 276.5  | 211.3  | 229.3  | 0.39998179  | 209.75   | 230.075 | 20.325  | 0.911659242 | 0.3816   | -1.097 |
| 103492_at   | 403.3  | 430.5  | 367.5  | 381.9  | 459.6  | 553.2  | 510.8  | 648.9  | 0.028966853 | 395.8    | 543.125 | 147.325 | 0.728745685 | 0.008392 | 1.364  |
| 103493_at   | 95.3   | 121.8  | 112.8  | 76.7   | 173.8  | 132.9  | 141.5  | 145.8  | 0.012902129 | 101.65   | 148.5   | 46.85   | 0.684511785 | 0.01614  | 1.476  |
| 103494_at   | 75.6   | 99.3   | 73.1   | 62     | 59.4   | 73.7   | 52.8   | 105.5  | 0.754462269 | 77.5     | 72.85   | 4.65    | 1.063829787 | 0.6597   | -1.087 |
| 103495_at   | 23.8   | 23.9   | 22.6   | 27     | 4.4    | 5.7    | 18.6   | 25.2   | 0.119437224 | 24.325   | 13.475  | 10.85   | 1.805194805 | 0.09716  | -2.324 |
| 103496_at   | 28.6   | 18.8   | 30.3   | 46.8   | 51.4   | 42.7   | 45.8   | 34.1   | 0.129950616 | 31.125   | 43.5    | 12.375  | 0.715517241 | 0.1171   | 1.455  |
| 103497_at   | 195.3  | 178    | 168    | 223.3  | 212.2  | 209    | 204.4  | 198.7  | 0.308783088 | 191.15   | 206.075 | 14.925  | 0.927574912 | 0.2519   | -1.084 |
| 103498_at   | 119.3  | 97.6   | 125.5  | 154.2  | 169.6  | 128.5  | 142.8  | 93.8   | 0.646149004 | 124.15   | 133.675 | 9.525   | 0.928745091 | 0.6933   | -1.067 |
| 103499_at   | 77.5   | 142.3  | 106.6  | 110.1  | 171.1  | 130.3  | 139.1  | 210.4  | 0.058252915 | 109.125  | 162.725 | 53.6    | 0.670609925 | 0.04994  | 1.498  |
| 103500_at   | 300.8  | 328.2  | 262.4  | 317.8  | 248.6  | 335.4  | 253.4  | 333.1  | 0.744531316 | 302.3    | 292.625 | 9.675   | 1.033062794 | 0.6984   | -1.04  |
| 103501_at   | 394    | 532    | 397.4  | 603.8  | 450    | 435.7  | 504.2  | 520.2  | 0.942618525 | 481.8    | 477.525 | 4.275   | 1.008952411 | 0.9634   | -1.006 |
| 103502_at   | 770.9  | 757.2  | 761    | 862.7  | 661.5  | 1051.3 | 1152.7 | 864.9  | 0.275925075 | 787.95   | 932.6   | 144.65  | 0.84489599  | 0.2864   | 1.16   |
| 103503_at   | 133    | 169.4  | 150.8  | 185.9  | 105    | 138.2  | 102.4  | 171.2  | 0.179580116 | 159.775  | 129.2   | 30.575  | 1.236648607 | 0.1607   | -1.255 |
| 103504_at   | 1512.8 | 1323.8 | 1306.4 | 1116   | 1190.6 | 1576.6 | 1071.8 | 1483.6 | 0.916241005 | 1314.75  | 1330.65 | 15.9    | 0.988050953 | 0.962    | -1.005 |
| 103506_f_at | 71.8   | 58.8   | 55.8   | 87.5   | 74.4   | 98.8   | 104.6  | 89.5   | 0.054593441 | 68.475   | 91.825  | 23.35   | 0.745711952 | 0.05519  | 1.352  |
| 103507_at   | 19     | 18.3   | 44.9   | 75.5   | 20.7   | 90.8   | 89.7   | 66.5   | 0.244902983 | 39.425   | 66.925  | 27.5    | 0.589092267 | 0.2966   | 1.756  |
| 103508_at   | 128.5  | 162.1  | 180.7  | 240.7  | 120.4  | 205.4  | 176.8  | 114.1  | 0.488757712 | 178      | 154.175 | 23.825  | 1.154532187 | 0.4715   | -1.161 |
| 103509_at   | 2.4    | 4.3    | 13.9   | 3.2    | 10     | 3.1    | 3.4    | 9.2    | 0.889191973 | 5.95     | 6.425   | 0.475   | 0.926070039 | 0.7164   | 1.208  |
| 103510_at   | 74.4   | 71.1   | 103.4  | 46.2   | 78.8   | 66     | 23.8   | 68.6   | 0.424008765 | 73.775   | 59.3    | 14.475  | 1.244097808 | 0.4286   | -1.314 |
| 103511_at   | 453.5  | 574.7  | 587.1  | 509.2  | 323.3  | 471.3  | 502.7  | 518.8  | 0.211838334 | 531.125  | 454.025 | 77.1    | 1.169814438 | 0.2258   | -1.183 |
| 103512_at   | 175.6  | 210.3  | 313.9  | 275.9  | 188    | 220.9  | 181.1  | 258.9  | 0.420408591 | 243.925  | 212.225 | 31.7    | 1.149369773 | 0.4526   | -1.132 |
| 103513_at   | 101.1  | 162.4  | 152.8  | 98.3   | 189    | 160    | 177.3  | 150.6  | 0.091267186 | 128.65   | 169.225 | 40.575  | 0.760230462 | 0.08207  | 1.345  |
| 103514_at   | 108    | 102.2  | 61     | 97.5   | 95.8   | 93.6   | 83.5   | 93.2   | 0.956020539 | 92.175   | 91.525  | 0.65    | 1.007101885 | 0.9168   | -1.015 |
| 103515_at   | 530.1  | 665.4  | 559.5  | 525.3  | 754.1  | 611.9  | 689.2  | 547.2  | 0.202838676 | 570.075  | 650.6   | 80.525  | 0.876229634 | 0.195    | 1.138  |
| 103516_at   | 29.8   | 55.7   | 39.6   | 55.5   | 64.5   | 77.3   | 94.3   | 73.1   | 0.011326592 | 45.15    | 77.3    | 32.15   | 0.584087969 | 0.01655  | 1.752  |
| 103517_at   | 18.6   | 27.3   | 39     | 72.5   | 11.1   | 59.6   | 62.7   | 48.9   | 0.72283742  | 39.35    | 45.575  | 6.225   | 0.863411958 | 0.8712   | -1.089 |
| 103518_at   | 74.8   | 19.7   | 48.9   | 54.3   | 42.7   | 73.2   | 64.5   | 72.3   | 0.351780403 | 49.425   | 63.175  | 13.75   | 0.782350613 | 0.3337   | 1.389  |
| 103519_at   | 22.5   | 6.9    | 13.8   | 9.4    | 5.4    | 6.9    | 27.7   | 42.9   | 0.476006563 | 13.15    | 20.725  | 7.575   | 0.634499397 | 0.7372   | 1.222  |
| 103520_at   | 39.9   | 56.1   | 73.9   | 76.9   | 52.4   | 92.1   | 95.6   | 92.1   | 0.163081532 | 61.7     | 83.05   | 21.35   | 0.742925948 | 0.199    | 1.353  |
| 103521_r_at | 36.4   | 32.4   | 72.9   | 75.4   | 33.6   | 24.4   | 56.9   | 36.5   | 0.276059614 | 54.275   | 37.85   | 16.425  | 1.433949802 | 0.2824   | -1.398 |
| 103522_at   | 19.1   | 38.4   | 23     | 28.2   | 10.6   | 59.4   | 28     | 38.6   | 0.561602762 | 27.175   | 34.15   | 6.975   | 0.795754026 | 0.8312   | -1.092 |
| 103523_at   | 99.8   | 190    | 152    | 150.4  | 149.3  | 227.4  | 165.4  | 161.9  | 0.314412036 | 148.05   | 176     | 27.95   | 0.841193182 | 0.2993   | 1.203  |
| 103524_at   | 446.3  | 625.6  | 578.9  | 543.3  | 615.6  | 452    | 534.6  | 608.5  | 0.941144873 | 548.525  | 552.675 | 4.15    | 0.992491066 | 0.943    | -1.008 |
| 103525_at   | 759.5  | 1137   | 1124   | 1142.8 | 752.8  | 1112.6 | 1025.3 | 1077.4 | 0.708777826 | 1040.825 | 992.025 | 48.8    | 1.049192309 | 0.7477   | -1.046 |
| 103526_at   | 257.7  | 391.6  | 404.5  | 383.2  | 469.8  | 404.2  | 611.7  | 318    | 0.255327608 | 359.25   | 450.925 | 91.675  | 0.796695681 | 0.2616   | 1.24   |
| 103527_at   | 87.5   | 73.4   | 87.6   | 70.5   | 116.7  | 62.8   | 94.2   | 105.1  | 0.297348504 | 79.75    | 94.7    | 14.95   | 0.842133052 | 0.3448   | 1.163  |
| 103529_at   | 199.5  | 138.3  | 145.8  | 174.6  | 165.4  | 145.9  | 144.5  | 145.7  | 0.398655104 | 164.55   | 150.375 | 14.175  | 1.094264339 | 0.4037   | -1.084 |
| 103530_at   | 149.7  | 143.8  | 183.8  | 207.5  | 121.8  | 150.1  | 135    | 188.7  | 0.325395591 | 171.2    | 148.9   | 22.3    | 1.149764943 | 0.3089   | -1.152 |
| 103531_f_at | 241.6  | 252.6  | 223    | 234.7  | 348.8  | 255.4  | 277.2  | 250.8  | 0.138817945 | 237.975  | 283.05  | 45.075  | 0.840752517 | 0.08428  | 1.18   |
| 103532_at   | 7.1    | 6.5    | 13.1   | 3.7    | 1.7    | 12     | 15     | 12.7   | 0.472570796 | 7.6      | 10.35   | 2.75    | 0.734299517 | 0.8202   | 1.147  |
| 103533_at   | 41.8   | 33.5   | 40.7   | 41.9   | 53.4   | 40.5   | 44.5   | 45.7   | 0.103438463 | 39.475   | 46.025  | 6.55    | 0.85768604  | 0.09885  | 1.165  |
| 103534_at   | 4572.1 | 3318.5 | 3140.3 | 2194.7 | 3911.8 | 2507.3 | 2677.7 | 3884.8 | 0.92480212  | 3306.4   | 3245.4  | 61      | 1.018795834 | 0.9753   | -1.006 |
| 103535_at   | 38.9   | 40.4   | 42.4   | 31     | 79.5   | 17.6   | 54.6   | 31.4   | 0.61831641  | 38.175   | 45.775  | 7.6     | 0.833970508 | 0.9155   | -1.038 |
| 103536_at   | 41.5   | 47.1   | 59.5   | 56.5   | 55.8   | 51     | 34.4   | 32.2   | 0.32602453  | 51.15    | 43.35   | 7.8     | 1.179930796 | 0.298    | -1.201 |
| 103537_at   | 161    | 187.5  | 165.7  | 150.9  | 205.7  | 173.3  | 161.2  | 211.9  | 0.194219564 | 166.275  | 188.025 | 21.75   | 0.884323893 | 0.1875   | 1.127  |
| 103538_at   | 17.9   | 25.3   | 22     | 33     | 19.6   | 25.1   | 35.1   | 43.7   | 0.357311837 | 24.55    | 30.875  | 6.325   | 0.7951417   | 0.3834   | 1.229  |
| 103539_at   | 152.2  | 139.3  | 125.5  | 119.8  | 141    | 177.4  | 139.1  | 197.8  | 0.132109577 | 134.2    | 163.825 | 29.625  | 0.819166794 | 0.1083   | 1.212  |
| 103540_at   | 120.2  | 139.2  | 102.2  | 90.9   | 140.3  | 128.5  | 119.3  | 114.8  | 0.345494851 | 113.125  | 125.725 | 12.6    | 0.899781269 | 0.305    | 1.123  |
| 103541_at   | 43.5   | 84.9   | 53.3   | 77     | 94.3   | 75.7   | 109.8  | 76     | 0.10662287  | 64.675   | 88.95   | 24.275  | 0.727093873 | 0.1069   | 1.408  |
| 103542_at   | 267    | 344    | 331.2  | 333.4  | 415.9  | 379.1  | 509.2  | 389.4  | 0.029894255 | 318.9    | 423.4   | 104.5   | 0.753188474 | 0.01912  | 1.325  |
| 103543_at   | 46.3   | 34     | 81.6   | 44.3   | 60.6   | 31.2   | 49.1   | 58.5   | 0.895743066 | 51.55    | 49.85   | 1.7     | 1.034102307 | 0.9612   | -1.012 |



|             |        |        |        |        |        |        |        |        |             |          |          |         |             |          |        |
|-------------|--------|--------|--------|--------|--------|--------|--------|--------|-------------|----------|----------|---------|-------------|----------|--------|
| 103544_at   | 363.5  | 481.7  | 541.7  | 716.6  | 533.8  | 496.6  | 527.9  | 597.4  | 0.874032094 | 525.875  | 538.925  | 13.05   | 0.975785128 | 0.7348   | -1.053 |
| 103545_at   | 467.4  | 383.3  | 368.8  | 359.8  | 342.4  | 452.8  | 448.1  | 480.7  | 0.392555928 | 394.825  | 431      | 36.175  | 0.916067285 | 0.4115   | -1.089 |
| 103546_at   | 61.6   | 101.7  | 92.4   | 62.9   | 103.8  | 84     | 14.6   | 86.1   | 0.749635442 | 79.65    | 72.125   | 7.525   | 1.104332756 | 0.552    | -1.351 |
| 103547_at   | 419.1  | 425.5  | 443.3  | 439.1  | 359.4  | 479.4  | 498.6  | 480.7  | 0.531260891 | 431.75   | 454.525  | 22.775  | 0.949892745 | 0.5947   | -1.044 |
| 103548_at   | 23.5   | 18.8   | 21.3   | 58.6   | 70.3   | 96.3   | 61.1   | 94.9   | 0.008200473 | 30.55    | 80.65    | 50.1    | 0.378797272 | 0.009245 | 2.904  |
| 103549_at   | 425.8  | 632.8  | 561.9  | 486.9  | 576    | 658.1  | 603.6  | 847.5  | 0.110059599 | 526.85   | 671.3    | 144.45  | 0.784820498 | 0.09427  | 1.273  |
| 103550_at   | 36.9   | 15.1   | 27.6   | 31.4   | 32.9   | 14.2   | 21.2   | 13.6   | 0.302210751 | 27.75    | 20.475   | 7.275   | 1.355311355 | 0.3022   | -1.378 |
| 103551_at   | 237.4  | 268.9  | 264.6  | 262    | 289.5  | 370.4  | 334.1  | 423.8  | 0.039047154 | 258.225  | 354.45   | 96.225  | 0.728523064 | 0.01126  | 1.361  |
| 103552_at   | 247.1  | 229.2  | 176.3  | 228.5  | 161.2  | 167.4  | 258.9  | 219.7  | 0.533364278 | 220.275  | 201.8    | 18.475  | 1.091551041 | 0.4903   | -1.104 |
| 103553_at   | 203    | 180.4  | 164.1  | 196.2  | 198.3  | 185    | 177.7  | 145.9  | 0.53992034  | 185.925  | 176.725  | 9.2     | 1.052058283 | 0.5324   | -1.055 |
| 103554_at   | 227.6  | 384    | 275.9  | 333.5  | 182.5  | 316.9  | 312.5  | 300.6  | 0.582947284 | 305.25   | 278.125  | 27.125  | 1.09752809  | 0.5956   | -1.103 |
| 103555_at   | 3301   | 3941   | 3665.9 | 3848.8 | 3165.5 | 3869.4 | 3805.5 | 3785.8 | 0.885565156 | 3689.175 | 3656.55  | 32.625  | 1.008922345 | 0.8777   | -1.01  |
| 103556_at   | 2215.9 | 2432.1 | 1991.9 | 2307.7 | 2506.1 | 2429   | 2450.6 | 2643.6 | 0.054375195 | 2236.9   | 2507.325 | 270.425 | 0.892146012 | 0.04625  | 1.123  |
| 103557_at   | 297.2  | 411.7  | 468.5  | 350.2  | 415.4  | 444.7  | 395.2  | 330.7  | 0.754840886 | 381.9    | 396.5    | 14.6    | 0.963177806 | 0.7078   | -1.047 |
| 103558_at   | 63.6   | 43.5   | 102.5  | 36.4   | 40.6   | 40.3   | 39.7   | 55.3   | 0.326576822 | 61.5     | 43.975   | 17.525  | 1.398521887 | 0.3169   | -1.303 |
| 103559_at   | 516.3  | 731.4  | 683.4  | 542    | 566.2  | 570.4  | 565    | 636.3  | 0.577904734 | 618.275  | 584.475  | 33.8    | 1.057829676 | 0.624    | -1.048 |
| 103560_at   | 355.1  | 473.4  | 403    | 439.1  | 310.3  | 531    | 463.5  | 406.5  | 0.856261994 | 417.65   | 427.825  | 10.175  | 0.976216911 | 0.9376   | -1.011 |
| 103562_f_at | 173.6  | 253.2  | 211.1  | 193.4  | 250.9  | 247.8  | 189.7  | 179.9  | 0.727109378 | 207.825  | 217.075  | 9.25    | 0.957388    | 0.7358   | -1.043 |
| 103563_at   | 338.1  | 496.3  | 354.4  | 411.1  | 317.6  | 410    | 366.1  | 349.9  | 0.383189656 | 399.975  | 360.9    | 39.075  | 1.108270989 | 0.3822   | -1.1   |
| 103564_at   | 276.5  | 466.6  | 315.3  | 335    | 309.8  | 420.9  | 457.1  | 453.9  | 0.29366634  | 348.35   | 410.425  | 62.075  | 0.84875434  | 0.2797   | 1.187  |
| 103565_at   | 1121.9 | 1056.1 | 1071.6 | 887.5  | 2023.7 | 906.5  | 1216.3 | 862.9  | 0.480177233 | 1034.275 | 1252.35  | 218.075 | 0.825867369 | 0.5324   | 1.143  |
| 103567_at   | 397.4  | 610.4  | 410.1  | 546.1  | 496    | 394.9  | 418.4  | 532.9  | 0.640682249 | 491      | 460.55   | 30.45   | 1.0661166   | 0.6825   | -1.056 |
| 103568_at   | 220.6  | 157.3  | 215    | 266.1  | 153    | 214.6  | 211.5  | 222.5  | 0.62154822  | 214.75   | 200.4    | 14.35   | 1.071606786 | 0.669    | -1.065 |
| 103569_at   | 141.8  | 174.8  | 206.2  | 195.2  | 200.6  | 187    | 105.6  | 213.8  | 0.926119314 | 179.5    | 176.75   | 2.75    | 1.015558699 | 0.8297   | -1.042 |
| 103570_at   | 1470.4 | 1341.3 | 1452.4 | 1682.7 | 984.2  | 1265.2 | 1140.3 | 995.6  | 0.007169862 | 1486.7   | 1096.325 | 390.375 | 1.356075981 | 0.006876 | -1.359 |
| 103571_at   | 426.7  | 208.4  | 420.6  | 291.3  | 309    | 324.1  | 298.1  | 227.3  | 0.456332914 | 336.75   | 289.625  | 47.125  | 1.162710401 | 0.5531   | -1.126 |
| 103573_at   | 157.1  | 178.5  | 113.3  | 148.1  | 60.3   | 56.5   | 109.6  | 125.4  | 0.03399899  | 149.25   | 87.95    | 61.3    | 1.696986924 | 0.04264  | -1.781 |
| 103574_at   | 212.3  | 124.7  | 161.5  | 172.6  | 265.4  | 189.9  | 310.5  | 179.8  | 0.117758713 | 167.775  | 236.4    | 68.625  | 0.709708122 | 0.09867  | 1.397  |
| 103575_at   | 30.6   | 42.9   | 35.2   | 26.3   | 24.5   | 30.8   | 4.3    | 27.2   | 0.143373409 | 33.75    | 21.7     | 12.05   | 1.555299539 | 0.2181   | -1.923 |
| 103577_at   | 6.1    | 3.7    | 3.3    | 12.1   | 12.4   | 6.8    | 22.7   | 4.5    | 0.301691565 | 6.3      | 11.6     | 5.3     | 0.543103448 | 0.2648   | 1.761  |
| 103578_at   | 690.4  | 759.7  | 797.3  | 730.8  | 491.3  | 747.1  | 580.6  | 668.5  | 0.109396827 | 744.55   | 621.875  | 122.675 | 1.197266332 | 0.09305  | -1.21  |
| 103579_at   | 326.2  | 287.3  | 236.3  | 275.2  | 282.3  | 328.7  | 408.5  | 337.2  | 0.125335432 | 281.25   | 339.175  | 57.925  | 0.829217955 | 0.1159   | 1.203  |
| 103580_at   | 976.9  | 817.9  | 730.4  | 875.2  | 910.6  | 938    | 1112.5 | 1270.2 | 0.088545913 | 850.1    | 1057.825 | 207.725 | 0.80363009  | 0.07256  | 1.24   |
| 103581_at   | 541.1  | 505.7  | 471.5  | 451.3  | 545.4  | 612.8  | 635.1  | 638.9  | 0.007700087 | 492.4    | 608.05   | 115.65  | 0.809801826 | 0.008006 | 1.235  |
| 103582_r_at | 103    | 103.5  | 102.7  | 121.4  | 160.4  | 108.5  | 135.7  | 122.6  | 0.113220906 | 107.65   | 131.8    | 24.15   | 0.81676783  | 0.07945  | 1.215  |
| 103584_at   | 427.5  | 738.2  | 481.9  | 542.3  | 455.3  | 608.4  | 546.2  | 575.9  | 0.989747346 | 547.475  | 546.45   | 1.025   | 1.001875743 | 0.9214   | -1.014 |
| 103585_at   | 239    | 365.1  | 275.3  | 279    | 221.4  | 257.7  | 245.1  | 253.2  | 0.189586793 | 289.6    | 244.35   | 45.25   | 1.185185185 | 0.1431   | -1.173 |
| 103588_at   | 145.5  | 120.2  | 193.2  | 202.3  | 221.5  | 257.3  | 239.5  | 141.3  | 0.177736605 | 165.3    | 214.9    | 49.6    | 0.769194974 | 0.205    | 1.296  |
| 103589_at   | 12.9   | 28.2   | 7.8    | 35.5   | 8.2    | 27.2   | 38.3   | 16.6   | 0.877720829 | 21.1     | 22.575   | 1.475   | 0.934662237 | 0.8654   | -1.09  |
| 103590_at   | 64.7   | 89.9   | 96.8   | 45.9   | 109.4  | 134.7  | 70.3   | 88.6   | 0.196857272 | 74.325   | 100.75   | 26.425  | 0.737717122 | 0.2009   | 1.373  |
| 103591_at   | 25.3   | 127.1  | 118.9  | 137.9  | 110.5  | 152.4  | 127.4  | 40.9   | 0.881289443 | 102.3    | 107.8    | 5.5     | 0.948979592 | 0.8079   | 1.136  |
| 103592_at   | 541.1  | 725.5  | 559.1  | 587.5  | 681.1  | 651.7  | 625.2  | 587.6  | 0.511823076 | 603.3    | 636.4    | 33.1    | 0.947988686 | 0.4526   | -1.06  |
| 103593_at   | 229.9  | 199.7  | 143.6  | 230.6  | 237.9  | 205.3  | 245.4  | 176.3  | 0.577939301 | 200.95   | 216.225  | 15.275  | 0.929355995 | 0.5646   | -1.086 |
| 103594_at   | 52.2   | 109.4  | 38     | 16.6   | 159    | 67.4   | 58.1   | 51.7   | 0.387542808 | 54.05    | 84.05    | 30      | 0.643069601 | 0.2852   | 1.728  |
| 103595_at   | 205.4  | 253.2  | 187.7  | 287.9  | 326.3  | 234.2  | 255.8  | 224.7  | 0.440770421 | 233.55   | 260.25   | 26.7    | 0.89740634  | 0.4174   | 1.118  |
| 103596_at   | 124.8  | 107.1  | 133.3  | 137    | 102.3  | 158.2  | 136    | 147.2  | 0.488390832 | 125.55   | 135.925  | 10.375  | 0.923671142 | 0.5458   | -1.073 |
| 103597_at   | 132.8  | 110.2  | 125.1  | 90     | 92.4   | 84.9   | 84.6   | 129.8  | 0.291065879 | 114.525  | 97.925   | 16.6    | 1.169517488 | 0.2693   | -1.176 |
| 103598_at   | 791    | 1015.1 | 950.7  | 1009.5 | 943.1  | 996.6  | 823.5  | 914.8  | 0.741722008 | 941.575  | 919.5    | 22.075  | 1.024007613 | 0.7746   | -1.021 |
| 103599_at   | 49.4   | 46     | 51     | 58.9   | 44     | 66     | 72.5   | 47.9   | 0.446442349 | 51.325   | 57.6     | 6.275   | 0.891059028 | 0.4884   | -1.102 |
| 103600_at   | 48     | 44.2   | 63.7   | 60.9   | 51.5   | 47.8   | 49.5   | 53.7   | 0.515704877 | 54.2     | 50.625   | 3.575   | 1.070617284 | 0.5553   | -1.06  |
| 103601_at   | 115.4  | 102.8  | 106.5  | 119.5  | 121    | 155    | 134    | 99.8   | 0.256241988 | 111.05   | 127.45   | 16.4    | 0.871322087 | 0.2464   | 1.135  |
| 103602_at   | 86.6   | 74.5   | 111.3  | 108.3  | 91.8   | 119.1  | 139.7  | 113.2  | 0.167796455 | 95.175   | 115.95   | 20.775  | 0.820827943 | 0.1725   | 1.221  |
| 103603_at   | 356.3  | 258.8  | 324.9  | 328.7  | 348    | 292.8  | 343.7  | 322    | 0.712692967 | 317.175  | 326.625  | 9.45    | 0.971067738 | 0.6845   | -1.034 |
| 103604_at   | 12.2   | 8.4    | 7.7    | 6.8    | 10.7   | 9.7    | 10.1   | 8.9    | 0.442020582 | 8.775    | 9.85     | 1.075   | 0.890862944 | 0.3409   | 1.145  |
| 103605_g_at | 219.8  | 324.7  | 301.7  | 259    | 205.9  | 253.2  | 289.4  | 263.5  | 0.455505905 | 276.3    | 253      | 23.3    | 1.092094862 | 0.4802   | -1.088 |
| 103606_r_at | 562.9  | 805.5  | 630.3  | 479.7  | 756.8  | 617.4  | 1023   | 525.5  | 0.426588251 | 619.6    | 730.675  | 111.075 | 0.847983029 | 0.4334   | 1.163  |



|             |        |        |        |        |        |        |        |        |             |          |          |         |             |          |        |
|-------------|--------|--------|--------|--------|--------|--------|--------|--------|-------------|----------|----------|---------|-------------|----------|--------|
| 103607_at   | 607.6  | 622.7  | 670.5  | 621    | 1399.8 | 658.5  | 917.5  | 848    | 0.130682396 | 630.45   | 955.95   | 325.5   | 0.65950102  | 0.0536   | 1.461  |
| 103608_at   | 901.2  | 739.8  | 855.4  | 741.5  | 696.3  | 884.5  | 741.8  | 710    | 0.421022317 | 809.475  | 758.15   | 51.325  | 1.067697685 | 0.4057   | -1.069 |
| 103609_at   | 6.3    | 4.5    | 18.4   | 5.4    | 10     | 14.9   | 4.3    | 9.8    | 0.789963431 | 8.65     | 9.75     | 1.1     | 0.887179487 | 0.6353   | 1.228  |
| 103610_at   | 94.5   | 75.9   | 92.1   | 105.7  | 72.3   | 120.9  | 102.4  | 108.5  | 0.489258938 | 92.05    | 101.025  | 8.975   | 0.911160604 | 0.5507   | -1.086 |
| 103611_at   | 396.9  | 734.7  | 522.5  | 585.7  | 565.9  | 665.4  | 650    | 643.6  | 0.393770879 | 559.95   | 631.225  | 71.275  | 0.887084637 | 0.327    | 1.153  |
| 103612_at   | 88.2   | 100.5  | 128.8  | 106.7  | 43.9   | 176.7  | 125.7  | 80.9   | 0.981351701 | 106.05   | 106.8    | 0.75    | 0.992977528 | 0.7394   | -1.114 |
| 103613_at   | 70.5   | 130.1  | 106.5  | 134.5  | 122.9  | 85.2   | 81.9   | 156.6  | 0.958348139 | 110.4    | 111.65   | 1.25    | 0.988804299 | 0.9811   | -1.005 |
| 103614_at   | 118.7  | 140.8  | 147.7  | 132.5  | 149.8  | 106.7  | 116.5  | 150.1  | 0.760880004 | 134.925  | 130.775  | 4.15    | 1.031733894 | 0.7067   | -1.04  |
| 103615_at   | 3.4    | 6      | 4.2    | 2.6    | 15.7   | 4.8    | 4      | 17     | 0.164406184 | 4.05     | 10.375   | 6.325   | 0.390361446 | 0.1135   | 2.184  |
| 103616_at   | 17.3   | 14.9   | 18.3   | 18.8   | 25.8   | 17.5   | 19.5   | 15.6   | 0.394257868 | 17.325   | 19.6     | 2.275   | 0.883928571 | 0.4005   | -1.115 |
| 103617_at   | 102.4  | 94     | 81.5   | 89.4   | 78.7   | 117.7  | 104.7  | 81.7   | 0.725401005 | 91.825   | 95.7     | 3.875   | 0.959508882 | 0.7881   | -1.031 |
| 103618_at   | 11.7   | 3.3    | 7.7    | 2.7    | 11.1   | 6.6    | 6.3    | 20.2   | 0.276679188 | 6.35     | 11.05    | 4.7     | 0.574660633 | 0.2121   | 1.842  |
| 103619_at   | 865.3  | 711.3  | 788    | 776.5  | 716.7  | 832.9  | 837.5  | 793.7  | 0.821854517 | 785.275  | 795.2    | 9.925   | 0.987518863 | 0.8173   | -1.013 |
| 103620_s_at | 682.9  | 849.8  | 773.6  | 775    | 732.5  | 719.9  | 784.2  | 899.1  | 0.807132455 | 770.325  | 783.925  | 13.6    | 0.982651402 | 0.8144   | -1.017 |
| 103622_at   | 461.9  | 526.3  | 506.9  | 557.9  | 546.2  | 556.1  | 548.7  | 787.3  | 0.204693065 | 513.25   | 609.575  | 96.325  | 0.841980068 | 0.1503   | 1.175  |
| 103623_at   | 319.4  | 386.9  | 297.2  | 376.4  | 396.7  | 352.6  | 359.6  | 380.7  | 0.313260018 | 344.975  | 372.4    | 27.425  | 0.926356069 | 0.2839   | -1.085 |
| 103624_at   | 433    | 379.2  | 410.4  | 281.9  | 390    | 435.1  | 314.7  | 350.5  | 0.935820934 | 376.125  | 372.575  | 3.55    | 1.009528283 | 0.9757   | -1.004 |
| 103625_at   | 551.4  | 699.1  | 555    | 719.5  | 646.3  | 654.3  | 646.9  | 653.6  | 0.702713195 | 631.25   | 650.275  | 19.025  | 0.970743147 | 0.6228   | -1.038 |
| 103628_at   | 360.3  | 234.2  | 379    | 306.4  | 421.7  | 375.5  | 361.6  | 513.9  | 0.08334393  | 319.975  | 418.175  | 98.2    | 0.765170084 | 0.08622  | 1.316  |
| 103629_g_at | 13.7   | 56.3   | 15.9   | 57.1   | 14.3   | 44.3   | 86.1   | 25.9   | 0.740893521 | 35.75    | 42.65    | 6.9     | 0.838218054 | 0.7615   | 1.189  |
| 103630_at   | 1117.9 | 979.4  | 1075.2 | 1224.4 | 1224.5 | 1019.5 | 1321.9 | 1332.8 | 0.212094467 | 1099.225 | 1224.675 | 125.45  | 0.89756466  | 0.2221   | 1.111  |
| 103631_at   | 321.8  | 395.9  | 344.5  | 259.3  | 397.1  | 353    | 332.6  | 322.1  | 0.554426375 | 330.375  | 351.2    | 20.825  | 0.940703303 | 0.5119   | -1.072 |
| 103632_at   | 42.6   | 6.5    | 12     | 6.9    | 34.9   | 25.1   | 11.2   | 6.7    | 0.826578846 | 17       | 19.475   | 2.475   | 0.872913992 | 0.6671   | 1.298  |
| 103634_at   | 217.3  | 339.4  | 351.8  | 281    | 223.7  | 477.8  | 486.3  | 396.6  | 0.21485483  | 297.375  | 396.1    | 98.725  | 0.750757384 | 0.2673   | 1.297  |
| 103635_at   | 441    | 358.8  | 393.3  | 425.1  | 418    | 365.8  | 382.4  | 434.4  | 0.861139456 | 404.55   | 400.15   | 4.4     | 1.010995877 | 0.8716   | -1.01  |
| 103636_at   | 1279   | 1651.3 | 1426.3 | 1810.6 | 1283.7 | 1681   | 1837.7 | 1961.8 | 0.460595747 | 1541.8   | 1691.05  | 149.25  | 0.911741226 | 0.4909   | -1.093 |
| 103637_at   | 745.4  | 548.3  | 588    | 509.9  | 733.6  | 528.7  | 676.4  | 718.3  | 0.378285152 | 597.9    | 664.25   | 66.35   | 0.900112909 | 0.3721   | -1.114 |
| 103638_at   | 103.7  | 149.2  | 116.4  | 138.8  | 67     | 112.1  | 111    | 115.8  | 0.151039786 | 127.025  | 101.475  | 25.55   | 1.251786154 | 0.1752   | -1.268 |
| 103639_at   | 117.2  | 75.3   | 91.5   | 110.9  | 68.8   | 72.9   | 95.1   | 69.1   | 0.106658292 | 98.725   | 76.475   | 22.25   | 1.290944753 | 0.0959   | -1.284 |
| 103641_at   | 13.9   | 9.4    | 8.2    | 17.6   | 18.5   | 15.9   | 16     | 10.6   | 0.319245758 | 12.275   | 15.25    | 2.975   | 0.804918033 | 0.2954   | 1.276  |
| 103642_at   | 3218.1 | 2641.7 | 2973.9 | 3308.7 | 2873.3 | 2606.6 | 2819.3 | 3390.8 | 0.630973337 | 3035.6   | 2922.5   | 113.1   | 1.038699743 | 0.6216   | -1.04  |
| 103643_at   | 1319.5 | 1148   | 1354.2 | 1148.3 | 872.7  | 897    | 792.5  | 994.6  | 0.00266785  | 1242.5   | 889.2    | 353.3   | 1.397323437 | 0.002    | -1.398 |
| 103644_at   | 258.8  | 293.9  | 307.2  | 248.6  | 304.5  | 299.6  | 313.9  | 248.2  | 0.50415295  | 277.125  | 291.55   | 14.425  | 0.950523066 | 0.5157   | -1.052 |
| 103645_at   | 10.2   | 33.2   | 53.3   | 22.1   | 75.7   | 56.8   | 4.4    | 18.6   | 0.649114835 | 29.7     | 38.875   | 9.175   | 0.763987138 | 0.9675   | -1.032 |
| 103646_at   | 268.3  | 246.6  | 236.7  | 263.2  | 215.1  | 262.7  | 203.1  | 212.2  | 0.107056581 | 253.7    | 223.275  | 30.425  | 1.136266935 | 0.08595  | -1.141 |
| 103647_at   | 625.7  | 593.7  | 644.8  | 525.5  | 570.4  | 657.4  | 622.9  | 573.4  | 0.806528773 | 597.425  | 606.025  | 8.6     | 0.985809166 | 0.7931   | -1.016 |
| 103648_at   | 79.7   | 160.6  | 101.9  | 126.4  | 71.6   | 99.2   | 84.9   | 125.9  | 0.343121287 | 117.15   | 95.4     | 21.75   | 1.227987421 | 0.3518   | -1.213 |
| 103649_at   | 780.5  | 548.5  | 696.9  | 631.9  | 868.9  | 749    | 997.1  | 758.1  | 0.058200095 | 664.45   | 843.275  | 178.825 | 0.787939877 | 0.0483   | 1.299  |
| 103650_at   | 571.7  | 682.4  | 614.8  | 745.2  | 696.7  | 616.9  | 617.6  | 762.4  | 0.714542158 | 653.525  | 673.4    | 19.875  | 0.970485595 | 0.7037   | -1.031 |
| 103651_r_at | 910.3  | 620.5  | 1114.5 | 975.8  | 963.7  | 934.2  | 882.8  | 938.4  | 0.830449082 | 905.275  | 929.775  | 24.5    | 0.973649539 | 0.7156   | -1.05  |
| 103653_at   | 634.8  | 642.6  | 635.8  | 560    | 588.5  | 438.1  | 490.3  | 466.3  | 0.024231494 | 618.3    | 495.8    | 122.5   | 1.247075434 | 0.01961  | -1.253 |
| 103654_at   | 1959.1 | 1148.1 | 1348.5 | 1459.7 | 739.1  | 1019.7 | 923.3  | 700.1  | 0.027101803 | 1478.85  | 845.55   | 633.3   | 1.748979954 | 0.008451 | -1.736 |
| 103655_at   | 620.9  | 871.9  | 739.2  | 617.8  | 821    | 703.2  | 723.2  | 828.9  | 0.448628196 | 712.45   | 769.075  | 56.625  | 0.92637259  | 0.3983   | -1.088 |
| 103656_at   | 1411.2 | 1199   | 1354.5 | 1000.7 | 1355   | 1307.3 | 1295.3 | 1416.5 | 0.354165596 | 1241.35  | 1343.525 | 102.175 | 0.923950057 | 0.3164   | -1.091 |
| 103657_i_at | 659.5  | 492.8  | 538    | 660.5  | 365.1  | 479.5  | 443.1  | 621.3  | 0.160826506 | 587.7    | 477.25   | 110.45  | 1.231430068 | 0.1505   | -1.244 |
| 103658_r_at | 75.1   | 54.2   | 70.6   | 106.1  | 67.8   | 68     | 69.9   | 97.8   | 0.963656013 | 76.5     | 75.875   | 0.625   | 1.008237232 | 0.9624   | -1.008 |
| 103660_at   | 271.3  | 287    | 313.5  | 297.9  | 273.7  | 271.5  | 195.1  | 277.2  | 0.151561896 | 292.425  | 254.375  | 38.05   | 1.14958231  | 0.1522   | -1.16  |
| 103662_at   | 20.8   | 11     | 13.3   | 10.8   | 62.8   | 68.8   | 13.8   | 58.1   | 0.058097777 | 13.975   | 50.875   | 36.9    | 0.274692875 | 0.0297   | 3.207  |
| 103663_at   | 249.3  | 335.9  | 318.5  | 305.1  | 358.8  | 326.4  | 306.2  | 348.9  | 0.196782962 | 302.2    | 335.075  | 32.875  | 0.901887637 | 0.1976   | -1.114 |
| 103664_r_at | 386.2  | 321.1  | 347.5  | 330.1  | 421.1  | 331    | 366.9  | 279.1  | 0.925241374 | 346.225  | 349.525  | 3.3     | 0.990558615 | 0.9939   | -1.001 |
| 103665_at   | 309.1  | 302.7  | 366.3  | 233    | 455.1  | 431.4  | 462.9  | 496.5  | 0.005023293 | 302.775  | 461.475  | 158.7   | 0.656102714 | 0.004435 | 1.542  |
| 103666_at   | 95.2   | 53.4   | 49.7   | 146.9  | 59.5   | 49.1   | 56.2   | 175.8  | 0.97681933  | 86.3     | 85.15    | 1.15    | 1.013505578 | 0.8772   | -1.065 |
| 103667_at   | 544.4  | 557.6  | 500.4  | 599.1  | 500.7  | 568.3  | 569.7  | 667.1  | 0.542168996 | 550.375  | 576.45   | 26.075  | 0.954766242 | 0.5586   | -1.044 |
| 103668_at   | 881.2  | 757.1  | 739.1  | 864    | 1245.2 | 823.3  | 1145.2 | 831.5  | 0.159363099 | 810.35   | 1011.3   | 200.95  | 0.801295362 | 0.125    | 1.23   |
| 103669_at   | 206.9  | 207.7  | 182.4  | 225.5  | 242.6  | 190.1  | 194.3  | 272.6  | 0.423904045 | 205.625  | 224.9    | 19.275  | 0.914295242 | 0.4403   | -1.084 |
| 103670_at   | 80.1   | 67.6   | 104.7  | 83.4   | 121.3  | 103.8  | 76.6   | 107    | 0.184666062 | 83.95    | 102.175  | 18.225  | 0.821629557 | 0.1912   | 1.216  |



|             |        |        |        |        |        |        |        |        |             |          |          |         |             |         |        |
|-------------|--------|--------|--------|--------|--------|--------|--------|--------|-------------|----------|----------|---------|-------------|---------|--------|
| 103671_at   | 107.6  | 76.9   | 83.1   | 76     | 110.8  | 102.2  | 83.5   | 112.5  | 0.151937745 | 85.9     | 102.25   | 16.35   | 0.8400978   | 0.1453  | 1.194  |
| 103672_at   | 537.7  | 804.3  | 559.6  | 711.3  | 936.5  | 583.9  | 764.6  | 758.1  | 0.305857815 | 653.225  | 760.775  | 107.55  | 0.858631001 | 0.3066  | 1.165  |
| 103673_at   | 361.5  | 331    | 309.8  | 378.4  | 310.3  | 349.8  | 471.7  | 458.5  | 0.289636614 | 345.175  | 397.575  | 52.4    | 0.868200968 | 0.2938  | 1.137  |
| 103674_f_at | 630.1  | 567.2  | 638.2  | 747.3  | 602.1  | 644.1  | 741.6  | 633.4  | 0.84843058  | 645.7    | 655.3    | 9.6     | 0.985350221 | 0.826   | -1.017 |
| 103675_at   | 192.4  | 327.8  | 156.2  | 177.1  | 166.4  | 220.2  | 288.5  | 204.8  | 0.892421012 | 213.375  | 219.975  | 6.6     | 0.969996591 | 0.7958  | -1.055 |
| 103676_at   | 82.7   | 78.4   | 90.8   | 62.5   | 85.7   | 38.3   | 93.2   | 61.7   | 0.552641333 | 78.6     | 69.725   | 8.875   | 1.127285766 | 0.4693  | -1.182 |
| 103678_at   | 1617.8 | 1332.8 | 1533.7 | 1926   | 1470.7 | 1498.7 | 1527   | 1954.1 | 0.954300111 | 1602.575 | 1612.625 | 10.05   | 0.993767925 | 0.9397  | -1.008 |
| 103679_at   | 11.2   | 15.5   | 18     | 34.1   | 16.8   | 8.7    | 21.9   | 14.9   | 0.50381924  | 19.7     | 15.575   | 4.125   | 1.264847512 | 0.5336  | -1.222 |
| 103680_at   | 457.7  | 399.7  | 477.3  | 579.3  | 296.1  | 475.5  | 419.3  | 444.6  | 0.246969748 | 478.5    | 408.875  | 69.625  | 1.170284317 | 0.2552  | -1.178 |
| 103681_at   | 766.4  | 796.1  | 899.3  | 844.6  | 702.9  | 820.2  | 837.1  | 785.1  | 0.371278555 | 826.6    | 786.325  | 40.275  | 1.05121928  | 0.3733  | -1.052 |
| 103682_at   | 398.4  | 465.9  | 436.6  | 458.9  | 258.2  | 495.7  | 335.6  | 524.1  | 0.612263403 | 439.95   | 403.4    | 36.55   | 1.090604859 | 0.4913  | -1.134 |
| 103683_at   | 354.4  | 411.3  | 444.1  | 446.6  | 384.5  | 434.8  | 410.1  | 454.3  | 0.804614218 | 414.1    | 420.925  | 6.825   | 0.98378571  | 0.7852  | -1.019 |
| 103684_at   | 41.1   | 51     | 52.7   | 48.2   | 65.6   | 49     | 13.6   | 48.4   | 0.737044109 | 48.25    | 44.15    | 4.1     | 1.092865232 | 0.5408  | -1.259 |
| 103685_at   | 98.4   | 184.2  | 118.5  | 110.5  | 93.5   | 127.4  | 100.3  | 146.6  | 0.651130419 | 127.9    | 116.95   | 10.95   | 1.093629756 | 0.6753  | -1.079 |
| 103686_at   | 24.2   | 25     | 22.2   | 30.4   | 55.6   | 41.7   | 43.6   | 23.6   | 0.094654107 | 25.45    | 41.125   | 15.675  | 0.618844985 | 0.06273 | 1.553  |
| 103688_at   | 3.4    | 22.1   | 4.8    | 4.4    | 1.8    | 2.3    | 5.1    | 11.5   | 0.519868174 | 8.675    | 5.175    | 3.5     | 1.676328502 | 0.4648  | -1.597 |
| 103689_at   | 214.8  | 165.7  | 188.7  | 284.2  | 315.6  | 170.9  | 242.5  | 159.4  | 0.850825497 | 213.35   | 222.1    | 8.75    | 0.960603332 | 0.9137  | -1.022 |
| 103690_at   | 71.4   | 90.3   | 79.3   | 108.7  | 71.6   | 124.6  | 79.1   | 85.8   | 0.84949317  | 87.425   | 90.275   | 2.85    | 0.968429798 | 0.8924  | -1.022 |
| 103691_at   | 878.2  | 620.5  | 712.4  | 668.9  | 519.9  | 651    | 592.2  | 657.5  | 0.137746195 | 720      | 605.15   | 114.85  | 1.189787656 | 0.1161  | -1.185 |
| 103692_at   | 275.5  | 342.9  | 305.5  | 352.5  | 393.4  | 377.1  | 428.8  | 475    | 0.01284969  | 319.1    | 418.575  | 99.475  | 0.762348444 | 0.0118  | 1.313  |
| 103693_at   | 75.9   | 91.7   | 87.2   | 99.5   | 74     | 54.3   | 78     | 55.2   | 0.027789953 | 88.575   | 65.375   | 23.2    | 1.354875717 | 0.03049 | -1.367 |
| 103694_at   | 247.3  | 307.4  | 328.4  | 242.2  | 316.5  | 281.1  | 342.3  | 392.4  | 0.155547814 | 281.325  | 333.075  | 51.75   | 0.844629588 | 0.1521  | 1.186  |
| 103695_f_at | 1856   | 1957.1 | 1716.5 | 1537.2 | 2395.9 | 1935   | 1716.2 | 1613.7 | 0.48633031  | 1766.7   | 1915.2   | 148.5   | 0.922462406 | 0.4994  | -1.076 |
| 103696_r_at | 22.9   | 32.3   | 36.1   | 49.2   | 28.7   | 33.8   | 30.2   | 34.8   | 0.600169128 | 35.125   | 31.875   | 3.25    | 1.101960784 | 0.7139  | -1.065 |
| 103697_at   | 296.7  | 356.8  | 223.4  | 426.5  | 220.1  | 358.5  | 289    | 384.6  | 0.829623509 | 325.85   | 313.05   | 12.8    | 1.040888037 | 0.8572  | -1.036 |
| 103699_i_at | 105    | 103.1  | 123.1  | 111    | 67.3   | 154.3  | 114    | 154.6  | 0.608141532 | 110.55   | 122.55   | 12      | 0.902080783 | 0.7992  | -1.055 |
| 103700_r_at | 60.4   | 48.9   | 76.7   | 90.3   | 32.5   | 80.5   | 54.1   | 71.5   | 0.52489357  | 69.075   | 59.65    | 9.425   | 1.158005029 | 0.4942  | -1.193 |
| 103701_at   | 549.7  | 504.3  | 589.7  | 552.1  | 537.1  | 528.2  | 380.9  | 632.2  | 0.622673114 | 548.95   | 519.6    | 29.35   | 1.056485758 | 0.5531  | -1.072 |
| 103702_i_at | 11.8   | 5      | 20.4   | 25     | 6.7    | 22.3   | 24.3   | 10.3   | 0.957021555 | 15.55    | 15.9     | 0.35    | 0.977987421 | 0.9121  | -1.056 |
| 103703_f_at | 11.9   | 67.5   | 42.1   | 56.7   | 90.6   | 23.9   | 89.2   | 73.7   | 0.258560229 | 44.55    | 69.35    | 24.8    | 0.642393655 | 0.3598  | 1.649  |
| 103704_at   | 274    | 301.9  | 325.8  | 394.3  | 349.5  | 369    | 321    | 530.4  | 0.261444485 | 324      | 392.475  | 68.475  | 0.825530289 | 0.2274  | 1.199  |
| 103706_at   | 374.1  | 392.2  | 400.3  | 408.5  | 332.8  | 409.3  | 371.4  | 486.6  | 0.863395533 | 393.775  | 400.025  | 6.25    | 0.984375977 | 0.9414  | -1.006 |
| 103707_at   | 95.7   | 78.7   | 93.8   | 143.4  | 90.3   | 86.7   | 97.8   | 99     | 0.55326168  | 102.9    | 93.45    | 9.45    | 1.101123596 | 0.6002  | -1.075 |
| 103708_at   | 926.3  | 654.2  | 888.6  | 695.6  | 749.3  | 863.2  | 724.7  | 787.5  | 0.899510837 | 791.175  | 781.175  | 10      | 1.012801229 | 0.9708  | -1.004 |
| 103709_at   | 1544.7 | 1980.4 | 1853.7 | 1436.3 | 1786.1 | 1774.4 | 1484.5 | 2068.6 | 0.684344265 | 1703.775 | 1778.4   | 74.625  | 0.958038124 | 0.6765  | -1.045 |
| 103710_at   | 293.7  | 220.9  | 225.2  | 247.2  | 249.7  | 269.5  | 222.7  | 280.5  | 0.688462099 | 246.75   | 255.6    | 8.85    | 0.965375587 | 0.6624  | -1.039 |
| 103711_at   | 242.5  | 401.1  | 280.3  | 325.1  | 346.3  | 343.3  | 524.9  | 472.6  | 0.107095419 | 312.25   | 421.775  | 109.525 | 0.740323632 | 0.09645 | 1.351  |
| 103712_at   | 536.3  | 861.6  | 589.1  | 650.8  | 640.5  | 702.2  | 711.6  | 766.1  | 0.581503453 | 659.45   | 705.1    | 45.65   | 0.93525741  | 0.4839  | -1.085 |
| 103713_at   | 1744.1 | 1576.4 | 1772.5 | 1875.1 | 1459   | 1774.8 | 1665.7 | 1938.1 | 0.793362444 | 1742.025 | 1709.4   | 32.625  | 1.019085644 | 0.7605  | -1.023 |
| 103714_at   | 15.9   | 18.6   | 7.3    | 11.5   | 17.1   | 27.3   | 31.4   | 21     | 0.038210399 | 13.325   | 24.2     | 10.875  | 0.550619835 | 0.04339 | 1.879  |
| 103715_at   | 85     | 91.3   | 85.4   | 83     | 59.2   | 100.9  | 115.8  | 140.1  | 0.371656884 | 86.175   | 104      | 17.825  | 0.828605769 | 0.4753  | 1.152  |
| 103716_at   | 327.1  | 383.1  | 354    | 302.1  | 284.2  | 360.2  | 372.9  | 428.5  | 0.589760458 | 341.575  | 361.45   | 19.875  | 0.945013142 | 0.6346  | -1.051 |
| 103717_at   | 325.2  | 307.1  | 300.9  | 302.8  | 282.6  | 287.5  | 319.3  | 332.5  | 0.804157255 | 309      | 305.475  | 3.525   | 1.011539406 | 0.7691  | -1.013 |
| 103718_at   | 69.9   | 86     | 93.1   | 109.6  | 61.2   | 78.8   | 60.4   | 81.1   | 0.107032974 | 89.65    | 70.375   | 19.275  | 1.273889876 | 0.09923 | -1.27  |
| 103719_at   | 41.4   | 10.1   | 10.1   | 9.8    | 22     | 52.8   | 17.9   | 36     | 0.24554066  | 17.85    | 32.175   | 14.325  | 0.554778555 | 0.1446  | 2.059  |
| 103720_at   | 325    | 369.9  | 344.1  | 557.1  | 482.8  | 460    | 471.2  | 454.6  | 0.29305038  | 399.025  | 467.15   | 68.125  | 0.854168897 | 0.1907  | 1.199  |
| 103721_at   | 113.5  | 83.3   | 113    | 100.5  | 107    | 148.1  | 81.4   | 115.9  | 0.530251653 | 102.575  | 113.1    | 10.525  | 0.90694076  | 0.5838  | -1.086 |
| 103723_at   | 167.5  | 114.5  | 131.6  | 114.6  | 131.5  | 169.8  | 165.7  | 127.8  | 0.35709612  | 132.05   | 148.7    | 16.65   | 0.88802959  | 0.3337  | 1.13   |
| 103726_at   | 973.1  | 727.8  | 744.6  | 782.3  | 675    | 710.9  | 452.7  | 785.8  | 0.152047356 | 806.95   | 656.1    | 150.85  | 1.22991922  | 0.1612  | -1.247 |
| 103727_at   | 241.5  | 214.7  | 214.8  | 258.5  | 215.8  | 310.3  | 268.9  | 291.9  | 0.15552252  | 232.375  | 271.725  | 39.35   | 0.85518447  | 0.152   | 1.162  |
| 103728_at   | 90.8   | 83.1   | 70.5   | 97.2   | 74.3   | 110.7  | 113.3  | 116.6  | 0.171960453 | 85.4     | 103.725  | 18.325  | 0.823330923 | 0.1948  | 1.204  |
| 103729_at   | 563.2  | 680.6  | 624.7  | 568.1  | 595.6  | 643.4  | 806.8  | 606.5  | 0.383959058 | 609.15   | 663.075  | 53.925  | 0.918674358 | 0.371   | -1.083 |
| 103730_at   | 5.6    | 7.5    | 3.4    | 5.1    | 6.7    | 8.1    | 4.2    | 5.6    | 0.548986471 | 5.4      | 6.15     | 0.75    | 0.87804878  | 0.5383  | 1.151  |
| 103731_at   | 217.8  | 234.5  | 282.2  | 275.3  | 280.6  | 256.3  | 287.8  | 236.8  | 0.534000748 | 252.45   | 265.375  | 12.925  | 0.951295337 | 0.5172  | -1.054 |
| 103732_at   | 101.6  | 148.6  | 137.4  | 156.8  | 174.6  | 114.6  | 104.2  | 196.9  | 0.675124025 | 136.1    | 147.575  | 11.475  | 0.922242927 | 0.7622  | -1.06  |
| 103733_at   | 130.7  | 121.6  | 114.1  | 125.5  | 99.8   | 138.4  | 111.6  | 114.2  | 0.472472349 | 122.975  | 116      | 6.975   | 1.06012931  | 0.4185  | -1.066 |



|             |        |        |        |        |        |        |        |        |             |         |          |         |             |          |        |
|-------------|--------|--------|--------|--------|--------|--------|--------|--------|-------------|---------|----------|---------|-------------|----------|--------|
| 103734_at   | 445    | 341    | 257    | 417.5  | 243.6  | 316.1  | 293.6  | 469.6  | 0.61314311  | 365.125 | 330.725  | 34.4    | 1.104013909 | 0.5849   | -1.113 |
| 103735_at   | 576.4  | 1113.9 | 779.4  | 761.5  | 1141.7 | 836.4  | 1076   | 878.5  | 0.246296497 | 807.8   | 983.15   | 175.35  | 0.821644713 | 0.2133   | 1.241  |
| 103736_at   | 115.4  | 296.5  | 185.1  | 243.2  | 240.1  | 256.5  | 227    | 208.1  | 0.604824042 | 210.05  | 232.925  | 22.875  | 0.901792422 | 0.4761   | 1.172  |
| 103737_at   | 344.7  | 481.9  | 414.9  | 547.7  | 225.7  | 417.1  | 383.9  | 638.2  | 0.759553624 | 447.3   | 416.225  | 31.075  | 1.074659139 | 0.6194   | -1.131 |
| 103738_at   | 240.6  | 420.4  | 500.3  | 509.7  | 375.6  | 378    | 537.7  | 527.7  | 0.649196847 | 417.75  | 454.75   | 37      | 0.918636614 | 0.6011   | 1.118  |
| 103739_at   | 838.9  | 620.7  | 737.2  | 748.7  | 435    | 655.4  | 697.4  | 555.4  | 0.089935245 | 736.375 | 585.8    | 150.575 | 1.257041652 | 0.09857  | -1.27  |
| 103741_at   | 440.1  | 378.3  | 403.7  | 429.9  | 400.9  | 362.8  | 387.3  | 348.9  | 0.082600944 | 413     | 374.975  | 38.025  | 1.10140676  | 0.08257  | -1.101 |
| 103742_at   | 178.9  | 145.7  | 185.6  | 176.2  | 221.6  | 142.9  | 220.8  | 230.3  | 0.219307362 | 171.6   | 203.9    | 32.3    | 0.841589014 | 0.251    | 1.172  |
| 103743_at   | 61.7   | 65     | 75.1   | 57.7   | 94     | 60.2   | 50.9   | 69.4   | 0.72650053  | 64.875  | 68.625   | 3.75    | 0.945355191 | 0.8138   | -1.035 |
| 103744_at   | 183    | 152.4  | 213.4  | 126.7  | 58.2   | 122.9  | 89.5   | 118.1  | 0.025895116 | 168.875 | 97.175   | 71.7    | 1.737844096 | 0.03145  | -1.778 |
| 103745_at   | 320.3  | 242.4  | 352.2  | 313.5  | 199.5  | 229    | 226.8  | 217.3  | 0.026537128 | 307.1   | 218.15   | 88.95   | 1.407746963 | 0.008051 | -1.397 |
| 103746_at   | 287.1  | 361.4  | 380.9  | 420.5  | 134.1  | 351.6  | 204.3  | 308.2  | 0.106213215 | 362.475 | 249.55   | 112.925 | 1.452514526 | 0.1135   | -1.538 |
| 103748_at   | 66.5   | 199.9  | 27.3   | 13     | 48.9   | 63.6   | 18.9   | 51     | 0.523566523 | 76.675  | 45.6     | 31.075  | 1.681469298 | 0.8658   | -1.121 |
| 103751_at   | 113.7  | 94.1   | 77.3   | 99.3   | 156    | 80.4   | 82.6   | 141.6  | 0.418221991 | 96.1    | 115.15   | 19.05   | 0.834563613 | 0.4798   | 1.156  |
| 103752_r_at | 280.6  | 297.7  | 224    | 337.3  | 196.2  | 292.6  | 259.1  | 207.2  | 0.206979949 | 284.9   | 238.775  | 46.125  | 1.19317349  | 0.2085   | -1.196 |
| 103753_at   | 1118.2 | 1208   | 1091.5 | 1329.7 | 1092.7 | 1249.1 | 1115.4 | 1227.1 | 0.821187302 | 1186.85 | 1171.075 | 15.775  | 1.013470529 | 0.8357   | -1.012 |
| 103754_at   | 1004.8 | 891.1  | 813.4  | 765    | 698.1  | 874.8  | 817.7  | 641.7  | 0.190140629 | 868.575 | 758.075  | 110.5   | 1.145763942 | 0.1857   | -1.148 |
| 103755_at   | 404.7  | 490.3  | 400.4  | 407.9  | 161.9  | 273.9  | 230.5  | 135.2  | 0.00166447  | 425.825 | 200.375  | 225.45  | 2.125140362 | 0.003372 | -2.201 |
| 103756_at   | 916.1  | 730.7  | 789    | 783.6  | 837.1  | 721.8  | 822.7  | 893.9  | 0.80100119  | 804.85  | 818.875  | 14.025  | 0.982872844 | 0.7947   | -1.018 |
| 103757_at   | 173.5  | 125    | 154.5  | 173.5  | 116.1  | 148.6  | 138.3  | 148.6  | 0.229783476 | 156.625 | 137.9    | 18.725  | 1.135786802 | 0.2495   | -1.131 |
| 103759_at   | 3.2    | 24.7   | 1.7    | 12.5   | 3.6    | 10.9   | 2.2    | 17.4   | 0.765269759 | 10.525  | 8.525    | 2       | 1.234604106 | 0.9777   | -1.023 |
| 103760_at   | 160.2  | 189.6  | 142.9  | 162.1  | 249.4  | 208.6  | 193    | 176.5  | 0.065418413 | 163.7   | 206.875  | 43.175  | 0.791299094 | 0.0486   | 1.26   |
| 103761_at   | 125.5  | 124.7  | 118.6  | 135.7  | 128.7  | 166.4  | 165.9  | 206.6  | 0.079975953 | 126.125 | 166.9    | 40.775  | 0.755692031 | 0.03778  | 1.307  |
| 103762_at   | 933.8  | 812.4  | 859    | 866.2  | 995.1  | 895.8  | 948.3  | 1033   | 0.042709652 | 867.85  | 968.05   | 100.2   | 0.89649295  | 0.04105  | -1.115 |
| 103763_at   | 493.2  | 547.5  | 520.4  | 516.7  | 591.2  | 524    | 611.9  | 551.6  | 0.08016228  | 519.45  | 569.675  | 50.225  | 0.911835696 | 0.06693  | 1.095  |
| 103765_at   | 103.9  | 174.4  | 121.2  | 106.5  | 123    | 89.3   | 154.2  | 153.9  | 0.878354183 | 126.5   | 130.1    | 3.6     | 0.972328978 | 0.884    | -1.027 |
| 103766_at   | 94.3   | 88.1   | 81     | 99.2   | 62.2   | 118.1  | 55.8   | 67.9   | 0.385913724 | 90.65   | 76       | 14.65   | 1.192763158 | 0.252    | -1.245 |
| 103767_f_at | 98.6   | 142.9  | 116.2  | 118.2  | 169.3  | 122.2  | 179.4  | 139.7  | 0.086206605 | 118.975 | 152.65   | 33.675  | 0.779397314 | 0.07862  | 1.279  |
| 103768_at   | 54.5   | 207.2  | 85.7   | 200    | 208.5  | 198.1  | 159.1  | 157.5  | 0.351615851 | 136.85  | 180.8    | 43.95   | 0.756913717 | 0.2594   | 1.52   |
| 103769_at   | 14.1   | 15.7   | 11.9   | 26     | 5.5    | 26.3   | 14.8   | 13.6   | 0.736673431 | 16.925  | 15.05    | 1.875   | 1.124584718 | 0.5791   | -1.238 |
| 103770_at   | 26.7   | 50.6   | 21.1   | 41.6   | 20.7   | 34.3   | 23     | 52.2   | 0.812331243 | 35      | 32.55    | 2.45    | 1.075268817 | 0.7847   | -1.087 |
| 103771_at   | 548.5  | 653.6  | 650.4  | 740.9  | 714.8  | 759.6  | 726.5  | 853.6  | 0.064146613 | 648.35  | 763.625  | 115.275 | 0.849042396 | 0.06403  | 1.182  |
| 103773_at   | 354.9  | 511.7  | 370    | 490.6  | 508.9  | 494.2  | 511.3  | 526    | 0.146975982 | 431.8   | 510.1    | 78.3    | 0.846500686 | 0.108    | 1.197  |
| 103774_at   | 198.4  | 198.9  | 151.6  | 199.1  | 155.7  | 188.7  | 142.5  | 246.7  | 0.896134032 | 187     | 183.4    | 3.6     | 1.019629226 | 0.8062   | -1.036 |
| 103776_at   | 15.5   | 12.7   | 19.8   | 18.9   | 37.8   | 31.3   | 25     | 54.1   | 0.04330202  | 16.725  | 37.05    | 20.325  | 0.451417004 | 0.007105 | 2.159  |
| 103778_at   | 11.5   | 21.9   | 38.7   | 18.8   | 11.3   | 50.6   | 47     | 54     | 0.179298136 | 22.725  | 40.725   | 18      | 0.55801105  | 0.2979   | 1.672  |
| 103779_at   | 115.6  | 319.1  | 143.5  | 154.2  | 282.6  | 222.2  | 218    | 233.7  | 0.31768421  | 183.1   | 239.125  | 56.025  | 0.765708312 | 0.1856   | 1.407  |
| 103780_at   | 319.7  | 219    | 305.8  | 274.9  | 246.7  | 303.7  | 335.9  | 229.3  | 0.978210514 | 279.85  | 278.9    | 0.95    | 1.003406239 | 0.9689   | -1.005 |
| 103781_at   | 858.6  | 1011.7 | 1001   | 1238.3 | 847.2  | 1098.5 | 927.5  | 1184.5 | 0.910025222 | 1027.4  | 1014.425 | 12.975  | 1.012790497 | 0.9078   | -1.013 |
| 103782_at   | 136.3  | 122.5  | 161    | 150.1  | 214.5  | 140.5  | 158.7  | 174.2  | 0.16465193  | 142.475 | 171.975  | 29.5    | 0.828463439 | 0.142    | 1.199  |
| 103783_at   | 879.1  | 920.2  | 796.7  | 926.9  | 521.3  | 848.1  | 790    | 766.7  | 0.128625794 | 880.725 | 731.525  | 149.2   | 1.203957486 | 0.1313   | -1.222 |
| 103784_at   | 206.9  | 234.2  | 202.1  | 157    | 295.5  | 202.3  | 212.3  | 194.9  | 0.394855583 | 200.05  | 226.25   | 26.2    | 0.884198895 | 0.3856   | -1.126 |
| 103786_at   | 98     | 97.9   | 133.1  | 109.9  | 126.8  | 111    | 66.5   | 127.9  | 0.9236834   | 109.725 | 108.05   | 1.675   | 1.015502082 | 0.8242   | -1.04  |
| 103787_at   | 9.5    | 7.9    | 6.7    | 11.2   | 10.1   | 6.2    | 9.5    | 13.9   | 0.579234802 | 8.825   | 9.925    | 1.1     | 0.889168766 | 0.6412   | -1.103 |
| 103789_at   | 175.3  | 277.8  | 232.8  | 298.6  | 246.3  | 281.3  | 222.1  | 302.5  | 0.625654648 | 246.125 | 263.05   | 16.925  | 0.93565862  | 0.5828   | -1.083 |
| 103790_at   | 691.2  | 461    | 663.5  | 587.7  | 366.3  | 465.9  | 468.8  | 655    | 0.208994151 | 600.85  | 489      | 111.85  | 1.228732106 | 0.2008   | -1.241 |
| 103791_at   | 491.4  | 321.1  | 336.5  | 498.1  | 240.1  | 366    | 293.4  | 343.2  | 0.130706762 | 411.775 | 310.675  | 101.1   | 1.325420455 | 0.1201   | -1.315 |
| 103792_at   | 23.3   | 25.3   | 26.5   | 26.5   | 27     | 27.9   | 19.4   | 12.4   | 0.383949496 | 25.4    | 21.675   | 3.725   | 1.171856978 | 0.3203   | -1.23  |
| 103793_at   | 122.1  | 116.1  | 149.4  | 122.6  | 119.1  | 187.4  | 124.9  | 176.2  | 0.267750392 | 127.55  | 151.9    | 24.35   | 0.839697169 | 0.2619   | 1.173  |
| 103794_i_at | 3.6    | 0.7    | 6.3    | 2.2    | 2.4    | 8.6    | 1.3    | 4.1    | 0.669801774 | 3.2     | 4.1      | 0.9     | 0.780487805 | 0.665    | 1.321  |
| 103795_f_at | 46.1   | 19.2   | 40.8   | 81.6   | 21.8   | 64.8   | 81.7   | 57.9   | 0.613466895 | 46.925  | 56.55    | 9.625   | 0.82979664  | 0.6398   | 1.228  |
| 103796_at   | 450.5  | 459.3  | 401.1  | 505    | 436.6  | 483.2  | 547.2  | 493.4  | 0.289965101 | 453.975 | 490.1    | 36.125  | 0.926290553 | 0.2905   | -1.08  |
| 103797_at   | 561.8  | 363.6  | 450.8  | 461.8  | 294.5  | 411.1  | 420.8  | 377    | 0.14872146  | 459.5   | 375.85   | 83.65   | 1.222562192 | 0.151    | -1.22  |
| 103799_at   | 372.9  | 258.6  | 310.4  | 319.3  | 203.9  | 311.4  | 249.9  | 278    | 0.146061962 | 315.3   | 260.8    | 54.5    | 1.208972393 | 0.1505   | -1.213 |
| 103800_at   | 361.8  | 505.7  | 478.9  | 507.8  | 497.1  | 536.1  | 575.1  | 599.6  | 0.083111321 | 463.55  | 551.975  | 88.425  | 0.839802527 | 0.09207  | 1.199  |
| 103801_at   | 417.5  | 286.6  | 320.2  | 334.3  | 378.1  | 304    | 290.2  | 362.2  | 0.86993976  | 339.65  | 333.625  | 6.025   | 1.018059198 | 0.8908   | -1.015 |



|             |        |        |        |        |        |        |        |        |             |          |          |         |             |          |        |
|-------------|--------|--------|--------|--------|--------|--------|--------|--------|-------------|----------|----------|---------|-------------|----------|--------|
| 103803_at   | 48     | 41.1   | 72.4   | 99.4   | 111    | 94.5   | 105.7  | 87     | 0.074518096 | 65.225   | 99.55    | 34.325  | 0.655198393 | 0.06053  | 1.614  |
| 103804_at   | 258.5  | 871.6  | 390.6  | 475.1  | 733.3  | 676.9  | 612.9  | 556.1  | 0.356228275 | 498.95   | 644.8    | 145.85  | 0.773805831 | 0.2273   | 1.418  |
| 103805_at   | 425.2  | 293.9  | 359.9  | 319.4  | 267.4  | 356.1  | 350.1  | 256.8  | 0.322417964 | 349.6    | 307.6    | 42      | 1.136540962 | 0.3146   | -1.138 |
| 103806_at   | 16     | 101.8  | 11.5   | 8.2    | 17.8   | 11.9   | 11.4   | 15.7   | 0.436950072 | 34.375   | 14.2     | 20.175  | 2.420774648 | 0.5641   | -1.419 |
| 103807_at   | 245.9  | 439.5  | 393.2  | 404.4  | 297.8  | 377.1  | 378.9  | 381.6  | 0.813226775 | 370.75   | 358.85   | 11.9    | 1.033161488 | 0.9247   | -1.014 |
| 103808_at   | 439.2  | 352.4  | 364.6  | 444.1  | 282.3  | 460.1  | 360.3  | 505.4  | 0.973596584 | 400.075  | 402.025  | 1.95    | 0.995149555 | 0.9235   | -1.015 |
| 103809_r_at | 612.9  | 621.6  | 779.7  | 730.3  | 624.3  | 608.5  | 716.5  | 623.3  | 0.411596998 | 686.125  | 643.15   | 42.975  | 1.06681956  | 0.4149   | -1.063 |
| 103810_at   | 91.7   | 86.5   | 63.8   | 94.2   | 133.4  | 97.8   | 114.1  | 104.8  | 0.033950602 | 84.05    | 112.525  | 28.475  | 0.746945123 | 0.03813  | 1.345  |
| 103811_at   | 307.7  | 331.9  | 321.7  | 286.3  | 375.4  | 323.6  | 276.4  | 325.4  | 0.583727321 | 311.9    | 325.2    | 13.3    | 0.959102091 | 0.6139   | -1.038 |
| 103812_at   | 878.4  | 744.5  | 883.9  | 1066.1 | 555.4  | 673.5  | 919.5  | 972.9  | 0.385680419 | 893.225  | 780.325  | 112.9   | 1.144683305 | 0.3521   | -1.165 |
| 103813_at   | 60.7   | 91.1   | 57.3   | 71.2   | 46.9   | 73     | 90.1   | 62.2   | 0.870160778 | 70.075   | 68.05    | 2.025   | 1.029757531 | 0.8217   | -1.041 |
| 103814_at   | 845.9  | 669.1  | 916.4  | 734.1  | 621    | 806.6  | 643    | 757.6  | 0.28287804  | 791.375  | 707.05   | 84.325  | 1.119263136 | 0.2841   | -1.118 |
| 103815_at   | 430.9  | 371.8  | 440.3  | 318.2  | 274.8  | 365.6  | 390.5  | 334.3  | 0.243553859 | 390.3    | 341.3    | 49      | 1.143568708 | 0.2573   | -1.144 |
| 103816_at   | 3037.6 | 2395.6 | 2627.9 | 2680.1 | 1488.3 | 2635.8 | 2243   | 2626.2 | 0.213362894 | 2685.3   | 2248.325 | 436.975 | 1.194355798 | 0.2135   | -1.22  |
| 103817_at   | 2762.2 | 2975.6 | 3029.8 | 2457.7 | 3218.5 | 3291.4 | 3183   | 2953.8 | 0.065575719 | 2806.325 | 3161.675 | 355.35  | 0.887607044 | 0.06133  | 1.129  |
| 103818_at   | 209.1  | 201.7  | 193.6  | 212.2  | 223.8  | 272.8  | 275.4  | 239.5  | 0.025606786 | 204.15   | 252.875  | 48.725  | 0.807315868 | 0.008409 | 1.235  |
| 103819_at   | 106.8  | 101.1  | 101.4  | 43     | 115.1  | 85.5   | 98.2   | 101.4  | 0.502815842 | 88.075   | 100.05   | 11.975  | 0.880309845 | 0.4521   | 1.2    |
| 103821_at   | 767.7  | 584.3  | 649.4  | 735.6  | 464    | 521.6  | 509.4  | 599.6  | 0.022427227 | 684.25   | 523.65   | 160.6   | 1.306693402 | 0.01713  | -1.305 |
| 103822_at   | 8.9    | 41.6   | 43.6   | 73.5   | 71.1   | 96.5   | 77.7   | 100.2  | 0.034623101 | 41.9     | 86.375   | 44.475  | 0.485094067 | 0.08562  | 2.591  |
| 103823_at   | 561.6  | 595.7  | 589.3  | 649.9  | 656.7  | 629.2  | 717.7  | 692.4  | 0.031715415 | 599.125  | 674      | 74.875  | 0.888909496 | 0.03092  | 1.125  |
| 103824_at   | 115.4  | 196.6  | 177    | 109.8  | 98.9   | 188.6  | 197.5  | 148.8  | 0.789479662 | 149.7    | 158.45   | 8.75    | 0.944777532 | 0.8104   | -1.056 |
| 103825_at   | 119.7  | 210.2  | 125.3  | 111.6  | 216    | 165.8  | 183.9  | 139.5  | 0.268862318 | 141.7    | 176.3    | 34.6    | 0.803743619 | 0.2113   | 1.271  |
| 103826_at   | 63.6   | 84.2   | 73.6   | 53.9   | 81.1   | 76.6   | 38.2   | 77.4   | 0.968362949 | 68.825   | 68.325   | 0.5     | 1.007317966 | 0.863    | -1.037 |
| 103828_at   | 324.1  | 266.7  | 294.4  | 254.6  | 278.9  | 387.3  | 267    | 294.4  | 0.518013871 | 284.95   | 306.9    | 21.95   | 0.928478332 | 0.5217   | -1.07  |
| 103829_at   | 147.4  | 185.5  | 186.2  | 219.4  | 154.6  | 223.6  | 247.3  | 175.3  | 0.572605076 | 184.625  | 200.2    | 15.575  | 0.922202797 | 0.6077   | -1.076 |
| 103830_at   | 82.4   | 162.8  | 107.8  | 125.1  | 134.8  | 161.3  | 163.8  | 132.8  | 0.196565422 | 119.525  | 148.175  | 28.65   | 0.806647545 | 0.1678   | 1.271  |
| 103831_at   | 81.4   | 48.2   | 44.8   | 56.7   | 12.5   | 70.4   | 75.8   | 87.6   | 0.847873282 | 57.775   | 61.575   | 3.8     | 0.938286642 | 0.7885   | -1.144 |
| 103832_at   | 124.6  | 161.2  | 113.6  | 179.5  | 171    | 142.5  | 147.3  | 175.4  | 0.453458062 | 144.725  | 159.05   | 14.325  | 0.909933983 | 0.4022   | -1.113 |
| 103833_at   | 16.8   | 80.2   | 55     | 119.8  | 60.9   | 65     | 136.1  | 122.6  | 0.369691957 | 67.95    | 96.15    | 28.2    | 0.706708268 | 0.3296   | 1.65   |
| 103835_f_at | 3929.3 | 3491.6 | 2786.7 | 2628.1 | 2135.8 | 3179.8 | 2750.4 | 2818.6 | 0.244756428 | 3208.925 | 2721.15  | 487.775 | 1.179253257 | 0.2476   | -1.175 |
| 103836_at   | 245    | 234.5  | 257.9  | 317.6  | 353.4  | 257.3  | 303.7  | 318    | 0.154603009 | 263.75   | 308.1    | 44.35   | 0.856053229 | 0.1487   | 1.169  |
| 103837_at   | 73.8   | 48.8   | 113.5  | 32.9   | 16.6   | 112.4  | 79.9   | 81     | 0.851348213 | 67.25    | 72.475   | 5.225   | 0.927906175 | 0.9601   | -1.027 |
| 103838_at   | 140.9  | 111.9  | 140.2  | 137.5  | 185.5  | 123.6  | 110.4  | 117.6  | 0.933742275 | 132.625  | 134.275  | 1.65    | 0.987711786 | 0.9693   | -1.005 |
| 103839_at   | 218.8  | 292.6  | 270.3  | 257.6  | 214.3  | 265.2  | 259.8  | 231.7  | 0.418575877 | 259.825  | 242.75   | 17.075  | 1.070339856 | 0.4352   | -1.068 |
| 103840_at   | 498.9  | 343.5  | 392.3  | 413.4  | 390.9  | 424.2  | 443.3  | 515.5  | 0.481339521 | 412.025  | 443.475  | 31.45   | 0.929082812 | 0.4538   | -1.081 |
| 103841_at   | 154.8  | 179.4  | 99.9   | 97.6   | 126.2  | 119.6  | 161    | 98.7   | 0.796734408 | 132.925  | 126.375  | 6.55    | 1.051829871 | 0.8751   | -1.031 |
| 103842_at   | 1253.5 | 873.9  | 829.1  | 954    | 688.5  | 1044.1 | 746    | 692.1  | 0.198516902 | 977.625  | 792.675  | 184.95  | 1.233323872 | 0.1671   | -1.236 |
| 103843_at   | 232.9  | 225.4  | 268.9  | 270    | 222.2  | 272.8  | 246.1  | 279.1  | 0.754744799 | 249.3    | 255.05   | 5.75    | 0.977455401 | 0.766    | -1.022 |
| 103844_at   | 5.5    | 6.8    | 7.3    | 7.7    | 12.1   | 5.6    | 11.4   | 15.7   | 0.125408499 | 6.825    | 11.2     | 4.375   | 0.609375    | 0.1079   | 1.55   |
| 103845_at   | 880.7  | 747.2  | 843.9  | 779.6  | 708.6  | 631.2  | 809.2  | 560.3  | 0.081097448 | 812.85   | 677.325  | 135.525 | 1.200088584 | 0.07222  | -1.209 |
| 103846_at   | 1827.8 | 1193.4 | 1614.8 | 869.1  | 975.6  | 1127.9 | 801.7  | 474.3  | 0.090900675 | 1376.275 | 844.875  | 531.4   | 1.628968782 | 0.09573  | -1.645 |
| 103847_at   | 24.3   | 35.7   | 24.9   | 66.2   | 48.1   | 44.5   | 39     | 39.9   | 0.644209889 | 37.775   | 42.875   | 5.1     | 0.881049563 | 0.4103   | 1.236  |
| 103848_at   | 486.7  | 470.1  | 440.7  | 502.3  | 271.6  | 414.1  | 387.6  | 435.3  | 0.069190772 | 474.95   | 377.15   | 97.8    | 1.259313271 | 0.06791  | -1.278 |
| 103849_at   | 73.8   | 105.8  | 106.3  | 97.6   | 100    | 140.9  | 83.3   | 69     | 0.894861911 | 95.875   | 98.3     | 2.425   | 0.975330621 | 0.9985   | -1     |
| 103850_at   | 121.1  | 157.6  | 101.9  | 156.1  | 105.1  | 120    | 150.9  | 209.2  | 0.670184792 | 134.175  | 146.3    | 12.125  | 0.917122351 | 0.7262   | -1.07  |
| 103852_at   | 763.1  | 488.2  | 625    | 651.7  | 452.8  | 617.6  | 537.4  | 585.2  | 0.265192544 | 632      | 548.25   | 83.75   | 1.152758778 | 0.2793   | -1.146 |
| 103853_at   | 268.7  | 309.5  | 301.9  | 271    | 250.6  | 237.2  | 160.7  | 206.3  | 0.025150374 | 287.775  | 213.7    | 74.075  | 1.346630791 | 0.02618  | -1.363 |
| 103854_at   | 424.6  | 463.1  | 432.9  | 395.3  | 546    | 406.4  | 473.5  | 464.8  | 0.236451286 | 428.975  | 472.675  | 43.7    | 0.907547469 | 0.2235   | -1.098 |
| 103855_at   | 161.7  | 307.8  | 258.7  | 259    | 279.8  | 208.8  | 345.3  | 321.6  | 0.363767998 | 246.8    | 288.875  | 42.075  | 0.854348767 | 0.385    | 1.181  |
| 103858_at   | 630.1  | 509.3  | 506.6  | 665.8  | 516    | 523    | 536.6  | 597.2  | 0.481835906 | 577.95   | 543.2    | 34.75   | 1.063972754 | 0.5012   | -1.058 |
| 103859_at   | 352.5  | 356.2  | 330.8  | 318.6  | 335.3  | 337.3  | 307.9  | 296.4  | 0.184773125 | 339.525  | 319.225  | 20.3    | 1.063591511 | 0.1851   | -1.064 |
| 103860_at   | 7.4    | 10     | 7.3    | 6.8    | 5      | 5.5    | 5.7    | 8.1    | 0.12146833  | 7.875    | 6.075    | 1.8     | 1.296296296 | 0.1021   | -1.301 |
| 103861_s_at | 1014.5 | 886.2  | 1057.5 | 1017.5 | 840.9  | 936.8  | 734.5  | 714.5  | 0.028736249 | 993.925  | 806.675  | 187.25  | 1.232125701 | 0.0281   | -1.237 |
| 103862_r_at | 550.7  | 689.9  | 588.3  | 747.5  | 802.1  | 732.6  | 696.8  | 410.2  | 0.874100981 | 644.1    | 660.425  | 16.325  | 0.975281069 | 0.9941   | -1.001 |
| 103863_at   | 2293.6 | 2197.8 | 2495.1 | 1804.4 | 2206.8 | 2226.6 | 2315.3 | 2205.6 | 0.798558526 | 2197.725 | 2238.575 | 40.85   | 0.981751784 | 0.731    | -1.025 |
| 103865_at   | 55.3   | 46     | 35.9   | 41.2   | 66.6   | 35.7   | 33.9   | 52.3   | 0.785084532 | 44.6     | 47.125   | 2.525   | 0.946419098 | 0.8849   | -1.028 |



|             |        |        |        |        |        |        |        |        |             |          |          |         |             |          |        |
|-------------|--------|--------|--------|--------|--------|--------|--------|--------|-------------|----------|----------|---------|-------------|----------|--------|
| 103866_at   | 36.9   | 105    | 150.7  | 137.4  | 116.2  | 86     | 118.8  | 42.3   | 0.612522773 | 107.5    | 90.825   | 16.675  | 1.183594825 | 0.7812   | -1.124 |
| 103867_at   | 111.4  | 136.4  | 70.5   | 108.3  | 121.6  | 127.9  | 92.1   | 127.5  | 0.536777751 | 106.65   | 117.275  | 10.625  | 0.909400981 | 0.5044   | 1.12   |
| 103868_at   | 83.2   | 157.6  | 115.7  | 91     | 232.1  | 128.2  | 166.3  | 128.7  | 0.136512254 | 111.875  | 163.825  | 51.95   | 0.682893331 | 0.1049   | 1.466  |
| 103869_at   | 685.2  | 663.5  | 567.7  | 563.9  | 524    | 728.5  | 564.8  | 597.5  | 0.774562467 | 620.075  | 603.7    | 16.375  | 1.0271244   | 0.7382   | -1.031 |
| 103871_at   | 713.2  | 457.6  | 516.7  | 575.4  | 447.7  | 613.4  | 491.7  | 636.7  | 0.806217343 | 565.725  | 547.375  | 18.35   | 1.033523636 | 0.8195   | -1.031 |
| 103872_r_at | 58     | 70.9   | 48.2   | 75.3   | 57.4   | 71.2   | 76.4   | 55.6   | 0.807107908 | 63.1     | 65.15    | 2.05    | 0.968534152 | 0.7782   | -1.039 |
| 103873_i_at | 1223.4 | 1359.8 | 1188.9 | 1268.6 | 1561.2 | 1193.1 | 1139.3 | 1132.9 | 0.975646081 | 1260.175 | 1256.625 | 3.55    | 1.002825027 | 0.9      | -1.011 |
| 103874_r_at | 55.8   | 48     | 68.9   | 52.2   | 73.3   | 73.6   | 98.2   | 56.8   | 0.108205824 | 56.225   | 75.475   | 19.25   | 0.744948658 | 0.08106  | 1.329  |
| 103875_at   | 505.1  | 495.2  | 554.7  | 518.7  | 489.6  | 524.1  | 552.3  | 553.5  | 0.586263185 | 518.425  | 529.875  | 11.45   | 0.97839113  | 0.5923   | -1.022 |
| 103876_at   | 1544.6 | 1023.3 | 1293.1 | 1228.5 | 987.6  | 1155.6 | 1203.1 | 953.7  | 0.174375033 | 1272.375 | 1075     | 197.375 | 1.183604651 | 0.1623   | -1.177 |
| 103877_at   | 478.9  | 408.7  | 465.8  | 366.9  | 423.4  | 418.6  | 483.8  | 511.2  | 0.431679439 | 430.075  | 459.25   | 29.175  | 0.93647251  | 0.4249   | -1.07  |
| 103878_at   | 1405.5 | 1681.6 | 1655.3 | 1687.1 | 1385.1 | 1709.3 | 1658   | 1819.2 | 0.767612478 | 1607.375 | 1642.9   | 35.525  | 0.978376651 | 0.7973   | -1.02  |
| 103879_at   | 497.5  | 529.8  | 345.6  | 559.2  | 594    | 409.2  | 543.6  | 720.4  | 0.338661609 | 483.025  | 566.8    | 83.775  | 0.852196542 | 0.3666   | 1.169  |
| 103881_at   | 431.1  | 476.5  | 375    | 431.2  | 348.5  | 438.2  | 398.2  | 377.1  | 0.225613405 | 428.45   | 390.5    | 37.95   | 1.097183099 | 0.227    | -1.097 |
| 103882_at   | 46.2   | 89     | 74     | 65.5   | 96.9   | 59.2   | 73.1   | 94.3   | 0.372505094 | 68.675   | 80.875   | 12.2    | 0.849149923 | 0.3794   | 1.187  |
| 103884_at   | 417.8  | 427.9  | 218.4  | 521.2  | 455.4  | 387.4  | 420.8  | 560.1  | 0.457539196 | 396.325  | 455.925  | 59.6    | 0.869276745 | 0.4173   | 1.196  |
| 103885_at   | 669.4  | 491.3  | 601.3  | 536.7  | 576.6  | 512.4  | 495.3  | 461    | 0.224481845 | 574.675  | 511.325  | 63.35   | 1.123893805 | 0.2159   | -1.12  |
| 103886_at   | 762    | 670.2  | 890.6  | 757.1  | 761.9  | 870.7  | 954.1  | 826.9  | 0.219260763 | 769.975  | 853.4    | 83.425  | 0.902243965 | 0.212    | -1.11  |
| 103887_at   | 389.2  | 114    | 145.9  | 138.7  | 385.9  | 317.3  | 244.7  | 562.4  | 0.10231352  | 196.95   | 377.575  | 180.625 | 0.521618222 | 0.06578  | 2.082  |
| 103888_at   | 455.6  | 790.8  | 590.3  | 629.2  | 464.9  | 671.6  | 586    | 534.6  | 0.55009404  | 616.475  | 564.275  | 52.2    | 1.092508086 | 0.5888   | -1.082 |
| 103889_at   | 318.6  | 273.3  | 315.2  | 250.9  | 248.6  | 395.4  | 325.6  | 334.1  | 0.34048969  | 289.5    | 325.925  | 36.425  | 0.88824116  | 0.3646   | -1.116 |
| 103890_at   | 199.5  | 303.1  | 273.2  | 281.5  | 390    | 280.9  | 396.3  | 319.3  | 0.063924135 | 264.325  | 346.625  | 82.3    | 0.762567616 | 0.07005  | 1.314  |
| 103891_i_at | 862.9  | 849.3  | 695.6  | 894.9  | 875.9  | 798.5  | 976.2  | 938.8  | 0.271071219 | 825.675  | 897.35   | 71.675  | 0.920125926 | 0.2814   | -1.089 |
| 103892_r_at | 97.5   | 84.3   | 91     | 84.9   | 96.7   | 132.2  | 130.9  | 89.2   | 0.133299992 | 89.425   | 112.25   | 22.825  | 0.796659243 | 0.09376  | 1.238  |
| 103893_at   | 947.2  | 792.1  | 720.4  | 940.5  | 797.4  | 870.2  | 1000.3 | 1030.4 | 0.378817633 | 850.05   | 924.575  | 74.525  | 0.919395398 | 0.3807   | -1.089 |
| 103894_at   | 1054.5 | 761.2  | 1080.8 | 785    | 1012.9 | 879.4  | 1082.2 | 1370.6 | 0.264508262 | 920.375  | 1086.275 | 165.9   | 0.847276242 | 0.2549   | 1.18   |
| 103895_at   | 1137.6 | 833.1  | 936.4  | 962    | 566.8  | 926.5  | 851.4  | 784.5  | 0.115801477 | 967.275  | 782.3    | 184.975 | 1.236450211 | 0.126    | -1.249 |
| 103896_f_at | 7.8    | 41.4   | 5.5    | 5.3    | 6.5    | 6.5    | 6.6    | 7      | 0.4135617   | 15       | 6.65     | 8.35    | 2.255639098 | 0.4529   | -1.478 |
| 103897_r_at | 18.2   | 40.5   | 15.6   | 15.5   | 26.6   | 10.9   | 19.9   | 20.6   | 0.686645728 | 22.45    | 19.5     | 2.95    | 1.151282051 | 0.7479   | -1.105 |
| 103899_at   | 416.8  | 569    | 508.9  | 488.5  | 510.8  | 546.2  | 601.5  | 579.6  | 0.145987443 | 495.8    | 559.525  | 63.725  | 0.886108753 | 0.1407   | 1.133  |
| 103900_at   | 277    | 434.9  | 244.2  | 275    | 223.1  | 318.6  | 282.9  | 247.5  | 0.449187339 | 307.775  | 268.025  | 39.75   | 1.148307061 | 0.4464   | -1.129 |
| 103901_at   | 335.8  | 250.7  | 295.2  | 321.8  | 197.3  | 301.5  | 254.2  | 301.1  | 0.27681201  | 300.875  | 263.525  | 37.35   | 1.141732283 | 0.2819   | -1.151 |
| 103903_at   | 381.1  | 261.5  | 347.6  | 212    | 272.8  | 248.1  | 203.9  | 142.6  | 0.137379241 | 300.55   | 216.85   | 83.7    | 1.385981093 | 0.1448   | -1.39  |
| 103904_at   | 2292.9 | 2781.2 | 2261.4 | 2250.9 | 3739.6 | 2331.4 | 3052.7 | 2340.4 | 0.265033301 | 2396.6   | 2866.025 | 469.425 | 0.836210431 | 0.2409   | 1.177  |
| 103905_at   | 171.2  | 88.3   | 139.3  | 136.6  | 86.2   | 116.4  | 135.8  | 93.8   | 0.261196796 | 133.85   | 108.05   | 25.8    | 1.238778343 | 0.2866   | -1.225 |
| 103906_f_at | 300.5  | 336.7  | 315.2  | 329.4  | 326.2  | 405.4  | 369.6  | 396.5  | 0.048209289 | 320.45   | 374.425  | 53.975  | 0.85584563  | 0.03197  | 1.165  |
| 103907_at   | 162.7  | 195.4  | 136.6  | 221.6  | 239.8  | 176.6  | 171.4  | 269    | 0.293677174 | 179.075  | 214.2    | 35.125  | 0.83601774  | 0.2948   | 1.193  |
| 103908_at   | 238.4  | 496.7  | 364.6  | 380.1  | 477    | 453.1  | 496.9  | 398.5  | 0.204712458 | 369.95   | 456.375  | 86.425  | 0.810627225 | 0.183    | 1.271  |
| 103909_at   | 464.7  | 361.5  | 458.5  | 493.2  | 435.6  | 524.2  | 519.9  | 418.3  | 0.479848554 | 444.475  | 474.5    | 30.025  | 0.936722866 | 0.4859   | -1.069 |
| 103910_at   | 830.2  | 1191   | 1009.5 | 1207   | 1026.3 | 839.5  | 1059.9 | 983.7  | 0.455932339 | 1059.425 | 977.35   | 82.075  | 1.083977081 | 0.4974   | -1.076 |
| 103911_at   | 188.6  | 185    | 238.2  | 215.5  | 131.6  | 202    | 159.8  | 218.5  | 0.271737832 | 206.825  | 177.975  | 28.85   | 1.162101419 | 0.2527   | -1.178 |
| 103912_at   | 263.7  | 175.6  | 219.7  | 270.4  | 106.9  | 206    | 250.7  | 284.3  | 0.666210895 | 232.35   | 211.975  | 20.375  | 1.096119825 | 0.5793   | -1.151 |
| 103913_at   | 1014   | 917.4  | 1054.5 | 1081.7 | 732    | 1151.3 | 1118.5 | 1102.7 | 0.934390112 | 1016.9   | 1026.125 | 9.225   | 0.991009867 | 0.965    | -1.005 |
| 103914_at   | 396.6  | 447.8  | 558    | 423.3  | 740.3  | 646.2  | 718.8  | 707.2  | 0.002109129 | 456.425  | 703.125  | 246.7   | 0.649137778 | 0.001493 | 1.552  |
| 103916_at   | 545    | 494.6  | 480.8  | 552.4  | 565.7  | 521.9  | 440.8  | 573.3  | 0.846017193 | 518.2    | 525.425  | 7.225   | 0.986249227 | 0.8875   | -1.01  |
| 103918_at   | 65.4   | 48.7   | 55.9   | 50.6   | 94.6   | 66     | 69.5   | 50.8   | 0.199823011 | 55.15    | 70.225   | 15.075  | 0.785332859 | 0.17     | 1.251  |
| 103921_i_at | 465.8  | 379.7  | 440.2  | 472.1  | 310.5  | 386.8  | 386.7  | 525.8  | 0.494541979 | 439.45   | 402.45   | 37      | 1.091936887 | 0.4239   | -1.108 |
| 103922_f_at | 493.8  | 489.4  | 523.7  | 512.4  | 296.7  | 576.5  | 450.1  | 449.9  | 0.362561408 | 504.825  | 443.3    | 61.525  | 1.138788631 | 0.3014   | -1.17  |
| 103923_at   | 240    | 218.9  | 198.9  | 170.1  | 235.6  | 304.4  | 265.7  | 205.9  | 0.130756962 | 206.975  | 252.9    | 45.925  | 0.818406485 | 0.1254   | 1.219  |
| 103924_at   | 712.9  | 727.6  | 753.6  | 792    | 630.7  | 591.1  | 663.9  | 793.8  | 0.181321895 | 746.525  | 669.875  | 76.65   | 1.114424333 | 0.1422   | -1.12  |
| 103925_at   | 364.8  | 335.2  | 342.7  | 258.8  | 448.8  | 382.1  | 343.1  | 451.4  | 0.061457113 | 325.375  | 406.35   | 80.975  | 0.800725975 | 0.06804  | 1.251  |
| 103926_at   | 200.5  | 284.6  | 236.6  | 413.5  | 230.1  | 324.3  | 157    | 323.8  | 0.699677062 | 283.8    | 258.8    | 25      | 1.096599691 | 0.6917   | -1.102 |
| 103927_at   | 281.3  | 307.9  | 257.7  | 382.5  | 230.7  | 316.6  | 286.4  | 395.1  | 0.997376913 | 307.35   | 307.2    | 0.15    | 1.000488281 | 0.9555   | -1.008 |
| 103928_at   | 301.7  | 193.9  | 198    | 208.2  | 203.7  | 185.5  | 150.2  | 192.9  | 0.202938842 | 225.45   | 183.075  | 42.375  | 1.231462515 | 0.1605   | -1.218 |
| 103930_at   | 364    | 475.9  | 309.8  | 520.5  | 502.5  | 429.3  | 315.1  | 486.4  | 0.815362497 | 417.55   | 433.325  | 15.775  | 0.963595454 | 0.801    | -1.043 |
| 103931_at   | 119    | 138.1  | 180.4  | 181.8  | 209.7  | 223    | 184.7  | 216.1  | 0.033048775 | 154.825  | 208.375  | 53.55   | 0.743011398 | 0.03244  | 1.364  |



|             |        |        |        |        |        |        |        |        |             |          |          |         |             |           |        |
|-------------|--------|--------|--------|--------|--------|--------|--------|--------|-------------|----------|----------|---------|-------------|-----------|--------|
| 103932_at   | 1559   | 1043.5 | 1275.2 | 1293.2 | 1035.3 | 1459.6 | 1385.5 | 1386.3 | 0.871799017 | 1292.725 | 1316.675 | 23.95   | 0.981810242 | 0.8681    | -1.02  |
| 103933_at   | 368.4  | 343.5  | 304    | 366.5  | 282.9  | 314.1  | 357    | 402.6  | 0.838823914 | 345.6    | 339.15   | 6.45    | 1.019018134 | 0.7893    | -1.025 |
| 103934_at   | 138.5  | 135.8  | 160.1  | 164.1  | 192.1  | 141.1  | 84.9   | 134.6  | 0.648414837 | 149.625  | 138.175  | 11.45   | 1.082865931 | 0.5301    | -1.124 |
| 103935_at   | 303.1  | 613.2  | 479.9  | 406.2  | 384    | 570.4  | 474.4  | 717.9  | 0.407902921 | 450.6    | 536.675  | 86.075  | 0.839614292 | 0.3997    | 1.198  |
| 103939_at   | 150.3  | 97.9   | 109.2  | 106.2  | 125.3  | 126.2  | 110.9  | 93.1   | 0.890819852 | 115.9    | 113.875  | 2.025   | 1.017782656 | 0.9295    | -1.011 |
| 103941_at   | 74     | 68.9   | 63.7   | 83.9   | 5.7    | 19.2   | 1.6    | 8.9    | 3.49708E-05 | 72.625   | 8.85     | 63.775  | 8.206214689 | 0.003546  | -11.56 |
| 103942_at   | 25     | 70.6   | 27.8   | 98.5   | 98.7   | 28.9   | 30.7   | 34.6   | 0.777074265 | 55.475   | 48.225   | 7.25    | 1.150336962 | 0.8023    | -1.124 |
| 103943_at   | 15     | 29.1   | 10.9   | 19.2   | 46.3   | 25.8   | 12.8   | 27     | 0.290733557 | 18.55    | 27.975   | 9.425   | 0.663092046 | 0.3048    | 1.457  |
| 103944_at   | 208.4  | 155.6  | 185.9  | 196.3  | 195.7  | 165.1  | 165.4  | 156.3  | 0.308046785 | 186.55   | 170.625  | 15.925  | 1.093333333 | 0.3153    | -1.091 |
| 103945_at   | 30.9   | 27.3   | 15.3   | 70     | 79.6   | 23.1   | 57.2   | 47.4   | 0.375383154 | 35.875   | 51.825   | 15.95   | 0.692233478 | 0.3348    | 1.534  |
| 103946_at   | 38.4   | 31.6   | 45.1   | 39.3   | 37.6   | 17.8   | 22.1   | 38.7   | 0.179031989 | 38.6     | 29.05    | 9.55    | 1.328743546 | 0.1614    | -1.393 |
| 103947_at   | 906.5  | 628.2  | 747.9  | 788.6  | 479.5  | 728.7  | 703.9  | 654.4  | 0.167392008 | 767.8    | 641.625  | 126.175 | 1.196649133 | 0.182     | -1.202 |
| 103948_at   | 55.6   | 119    | 92.4   | 73.9   | 144.8  | 36.7   | 144.2  | 30.2   | 0.919385869 | 85.225   | 88.975   | 3.75    | 0.95785333  | 0.7255    | -1.182 |
| 103949_at   | 90.2   | 62.3   | 96.9   | 138.2  | 64.6   | 108.5  | 108    | 122.3  | 0.850745889 | 96.9     | 100.85   | 3.95    | 0.96083292  | 0.8182    | -1.053 |
| 103950_at   | 66.5   | 48.4   | 78.9   | 97.1   | 47.7   | 79.9   | 57.2   | 58     | 0.371925245 | 72.725   | 60.7     | 12.025  | 1.198105437 | 0.3952    | -1.182 |
| 103952_at   | 11.3   | 13.3   | 16.4   | 13.8   | 7.5    | 19.2   | 12.9   | 12.2   | 0.788770292 | 13.7     | 12.95    | 0.75    | 1.057915058 | 0.6435    | -1.106 |
| 103953_at   | 798.2  | 521.7  | 651.1  | 588.2  | 454.4  | 586.2  | 505.3  | 477.9  | 0.10553085  | 639.8    | 505.95   | 133.85  | 1.264551833 | 0.07507   | -1.255 |
| 103954_at   | 30.8   | 30.4   | 45.7   | 39.2   | 57.9   | 40.3   | 11.9   | 34.9   | 0.979764292 | 36.525   | 36.25    | 0.275   | 1.007586207 | 0.7138    | -1.146 |
| 103955_at   | 1565.8 | 1223.9 | 1432.3 | 1217.2 | 1385.5 | 1603.6 | 1319.5 | 1131.5 | 0.998668067 | 1359.8   | 1360.025 | 0.225   | 0.999834562 | 0.9854    | -1.002 |
| 103956_at   | 62.6   | 125.2  | 96.6   | 37.8   | 238.9  | 44.3   | 51.1   | 54.8   | 0.759524011 | 80.55    | 97.275   | 16.725  | 0.828064765 | 0.9858    | -1.009 |
| 103957_at   | 109.8  | 73.8   | 96.8   | 97.2   | 40.2   | 85.9   | 90.7   | 61.3   | 0.132346131 | 94.4     | 69.525   | 24.875  | 1.357784969 | 0.1441    | -1.411 |
| 103958_g_at | 977.8  | 1130.5 | 876.2  | 1378.5 | 683.2  | 649.3  | 538.5  | 1344.8 | 0.237176473 | 1090.75  | 803.95   | 286.8   | 1.356738603 | 0.1609    | -1.428 |
| 103959_at   | 625.5  | 1034.1 | 729.4  | 1113.6 | 534.2  | 707.1  | 708.8  | 724.6  | 0.177882024 | 875.65   | 668.675  | 206.975 | 1.309530041 | 0.1614    | -1.283 |
| 103960_at   | 136.4  | 217.9  | 155.1  | 168.1  | 128.7  | 177.9  | 188.8  | 116.3  | 0.534611844 | 169.375  | 152.925  | 16.45   | 1.10756907  | 0.5105    | -1.114 |
| 103961_s_at | 9      | 73.7   | 28.4   | 12.3   | 12.8   | 27.8   | 35.1   | 17     | 0.653383382 | 30.85    | 23.175   | 7.675   | 1.331175836 | 0.9688    | -1.022 |
| 103962_at   | 18.5   | 23.4   | 29.9   | 32.9   | 10.2   | 29.3   | 20.9   | 21.6   | 0.308803055 | 26.175   | 20.5     | 5.675   | 1.276829268 | 0.307     | -1.334 |
| 103963_f_at | 56     | 50.3   | 67.2   | 45.2   | 88.5   | 56.5   | 39.9   | 60.1   | 0.585061478 | 54.675   | 61.25    | 6.575   | 0.892653061 | 0.6624    | -1.088 |
| 103964_at   | 153.3  | 268.4  | 222.8  | 420.6  | 255.5  | 337.2  | 239.8  | 519.3  | 0.434624371 | 266.275  | 337.95   | 71.675  | 0.787912413 | 0.386     | 1.292  |
| 103965_at   | 282.2  | 345.7  | 314.7  | 303.4  | 342.7  | 252.5  | 294.9  | 380.5  | 0.851238645 | 311.5    | 317.65   | 6.15    | 0.980639068 | 0.9195    | -1.01  |
| 103967_at   | 56.5   | 58.9   | 62     | 47.4   | 24.5   | 65.8   | 41.4   | 53.4   | 0.351811851 | 56.2     | 46.275   | 9.925   | 1.21447866  | 0.2976    | -1.286 |
| 103968_at   | 54.9   | 44.1   | 46.1   | 44.9   | 6.6    | 44.6   | 41.2   | 47.7   | 0.28655835  | 47.5     | 35.025   | 12.475  | 1.356174161 | 0.3044    | -1.717 |
| 103969_at   | 551.7  | 796.2  | 498.8  | 831.1  | 581.5  | 640.5  | 639.9  | 616.9  | 0.599088845 | 669.45   | 619.7    | 49.75   | 1.080280781 | 0.6965    | -1.055 |
| 103970_at   | 142.4  | 195.8  | 171.1  | 173.9  | 176.5  | 166.3  | 173.3  | 202    | 0.542896925 | 170.8    | 179.525  | 8.725   | 0.951399527 | 0.5189    | -1.055 |
| 103971_at   | 165.6  | 194    | 223.2  | 195    | 193.3  | 181.7  | 238.4  | 326    | 0.314008628 | 194.45   | 234.85   | 40.4    | 0.827975303 | 0.2939    | 1.182  |
| 103972_at   | 2.8    | 3.8    | 4      | 4.1    | 4.5    | 4.6    | 4      | 4.1    | 0.127204896 | 3.675    | 4.3      | 0.625   | 0.854651163 | 0.156     | 1.167  |
| 103973_at   | 53.4   | 41.6   | 50     | 50.3   | 69.8   | 52     | 24.7   | 11.4   | 0.532808036 | 48.825   | 39.475   | 9.35    | 1.236858771 | 0.3397    | -1.528 |
| 103974_at   | 40.5   | 13.2   | 40.4   | 48.2   | 56.1   | 21.8   | 10.8   | 34.7   | 0.716889658 | 35.575   | 30.85    | 4.725   | 1.153160454 | 0.6717    | -1.228 |
| 103975_at   | 394.5  | 438    | 420.3  | 485.1  | 304.6  | 470.9  | 519.8  | 646.2  | 0.531009852 | 434.475  | 485.375  | 50.9    | 0.895132629 | 0.6502    | -1.081 |
| 103976_at   | 59.6   | 40.2   | 11.3   | 32.4   | 9.6    | 6.1    | 10.2   | 7.2    | 0.069287878 | 35.875   | 8.275    | 27.6    | 4.335347432 | 0.01209   | -3.792 |
| 103977_at   | 23.4   | 28     | 33.3   | 14.7   | 44.5   | 23.7   | 38.4   | 36.4   | 0.113988922 | 24.85    | 35.75    | 10.9    | 0.695104895 | 0.1362    | 1.464  |
| 103978_at   | 371.6  | 391.6  | 365.7  | 465.5  | 331.4  | 406.3  | 363.3  | 434.1  | 0.662643429 | 398.6    | 383.775  | 14.825  | 1.038629405 | 0.653     | -1.039 |
| 103980_at   | 261.4  | 319.8  | 275.3  | 318.2  | 274.5  | 238    | 298.9  | 279.4  | 0.326287952 | 293.675  | 272.7    | 20.975  | 1.076916025 | 0.3331    | -1.076 |
| 103981_at   | 581.6  | 456.3  | 635    | 593.1  | 443.6  | 875.5  | 653.5  | 383.6  | 0.858567582 | 566.5    | 589.05   | 22.55   | 0.961718021 | 0.975     | -1.007 |
| 103982_s_at | 40.9   | 21.5   | 29.6   | 21.1   | 4.8    | 6.8    | 4.7    | 5.5    | 0.015546286 | 28.275   | 5.45     | 22.825  | 5.188073394 | 0.0000983 | -5.064 |
| 103983_at   | 107.4  | 67.5   | 63.5   | 37.7   | 6.8    | 11.4   | 17.6   | 12.9   | 0.027439646 | 69.025   | 12.175   | 56.85   | 5.669404517 | 0.001041  | -5.593 |
| 103984_at   | 4.7    | 1.3    | 1.2    | 2.6    | 2.2    | 1.3    | 0.9    | 11.3   | 0.604162921 | 2.45     | 3.925    | 1.475   | 0.624203822 | 0.8628    | -1.123 |
| 103985_at   | 16.1   | 24.1   | 23.1   | 20.5   | 12.7   | 21.6   | 17.7   | 17     | 0.19732353  | 20.95    | 17.25    | 3.7     | 1.214492754 | 0.2084    | -1.221 |
| 103986_at   | 217.2  | 140.3  | 144.5  | 185    | 157.8  | 205.9  | 129    | 132    | 0.562982338 | 171.75   | 156.175  | 15.575  | 1.099727869 | 0.5434    | -1.102 |
| 103987_at   | 7.3    | 5.1    | 5.6    | 4.2    | 7.9    | 6.3    | 7.5    | 3.4    | 0.573889341 | 5.55     | 6.275    | 0.725   | 0.884462151 | 0.6917    | -1.098 |
| 103988_at   | 228.6  | 399.9  | 325.3  | 316.7  | 356.7  | 370.6  | 428.2  | 425.6  | 0.11312843  | 317.625  | 395.275  | 77.65   | 0.803554487 | 0.1088    | 1.265  |
| 103989_at   | 384.9  | 338.1  | 401.3  | 351.4  | 439.1  | 381.2  | 517.1  | 330    | 0.328282652 | 368.925  | 416.85   | 47.925  | 0.885030587 | 0.3283    | 1.117  |
| 103990_at   | 184.9  | 213.5  | 271.6  | 279.2  | 236.7  | 312.4  | 203    | 247.4  | 0.710604649 | 237.3    | 249.875  | 12.575  | 0.949674837 | 0.7007    | -1.055 |
| 103991_at   | 165.4  | 96.4   | 183.3  | 198.3  | 165.6  | 153.1  | 177.1  | 193    | 0.662672532 | 160.85   | 172.2    | 11.35   | 0.934088269 | 0.5763    | -1.106 |
| 103992_f_at | 37     | 69.7   | 40.2   | 29.4   | 105    | 52.3   | 52.3   | 101.2  | 0.107950432 | 44.075   | 77.7     | 33.625  | 0.567245817 | 0.08011   | 1.757  |
| 103993_at   | 31.4   | 130.7  | 133.1  | 154.9  | 190.3  | 213.6  | 171.1  | 185.3  | 0.061739507 | 112.525  | 190.075  | 77.55   | 0.592003157 | 0.1209    | 1.976  |
| 103994_at   | 330.4  | 555.2  | 309    | 463.8  | 439.9  | 420.9  | 328    | 537.3  | 0.82305497  | 414.6    | 431.525  | 16.925  | 0.960778634 | 0.7645    | -1.055 |



|           |        |        |        |        |        |        |        |        |             |          |          |         |             |         |        |
|-----------|--------|--------|--------|--------|--------|--------|--------|--------|-------------|----------|----------|---------|-------------|---------|--------|
| 103995_at | 4      | 6      | 7.3    | 4.6    | 2.7    | 3.1    | 4.7    | 3.1    | 0.061864034 | 5.475    | 3.4      | 2.075   | 1.610294118 | 0.03805 | -1.6   |
| 103997_at | 83.3   | 125.8  | 152.9  | 26.7   | 92.4   | 107.1  | 114.8  | 127.5  | 0.669159867 | 97.175   | 110.45   | 13.275  | 0.879809869 | 0.471   | 1.356  |
| 103998_at | 146.4  | 165.2  | 127.4  | 150.6  | 155.6  | 160.4  | 168.5  | 124.4  | 0.711226734 | 147.4    | 152.225  | 4.825   | 0.968303498 | 0.7384  | -1.031 |
| 103999_at | 152    | 196.1  | 176.4  | 121.9  | 224    | 158.5  | 201.8  | 196.4  | 0.162493855 | 161.6    | 195.175  | 33.575  | 0.827974894 | 0.1694  | 1.217  |
| 104000_at | 166.4  | 140.8  | 204.9  | 207.4  | 226.2  | 269.2  | 308    | 216.2  | 0.032337634 | 179.875  | 254.9    | 75.025  | 0.70566889  | 0.02928 | 1.421  |
| 104001_at | 93.5   | 82.3   | 99.2   | 112.3  | 98.1   | 76.3   | 84.8   | 108.2  | 0.616670381 | 96.825   | 91.85    | 4.975   | 1.054164398 | 0.6013  | -1.057 |
| 104002_at | 1882.5 | 1172.6 | 1492.3 | 1764.3 | 726    | 991.4  | 1045.2 | 1321.3 | 0.033670419 | 1577.925 | 1020.975 | 556.95  | 1.54550797  | 0.03463 | -1.555 |
| 104003_at | 266.9  | 377.3  | 279    | 273.5  | 372.5  | 340.2  | 372.4  | 370.1  | 0.085645333 | 299.175  | 363.8    | 64.625  | 0.822361187 | 0.05075 | 1.228  |
| 104004_at | 347.4  | 385.6  | 401    | 456.6  | 368.5  | 488.5  | 384.6  | 408.1  | 0.68766135  | 397.65   | 412.425  | 14.775  | 0.964175305 | 0.6883  | -1.036 |
| 104005_at | 358.8  | 336.7  | 415.4  | 492.5  | 366.5  | 319.4  | 345    | 647.4  | 0.834192241 | 400.85   | 419.575  | 18.725  | 0.955371507 | 0.9412  | -1.014 |
| 104006_at | 290.5  | 326    | 279.2  | 345.6  | 114.1  | 279.6  | 220.3  | 217.4  | 0.050808795 | 310.325  | 207.85   | 102.475 | 1.493023815 | 0.06523 | -1.564 |
| 104007_at | 344.8  | 492    | 340.4  | 363.3  | 292.7  | 410.2  | 431.7  | 530.6  | 0.627173985 | 385.125  | 416.3    | 31.175  | 0.9251141   | 0.6688  | -1.07  |
| 104008_at | 7.7    | 12.5   | 9.6    | 10.3   | 13.3   | 6.4    | 13.9   | 9.7    | 0.707095288 | 10.025   | 10.825   | 0.8     | 0.926096998 | 0.8367  | -1.045 |
| 104010_at | 371.1  | 482    | 443.1  | 430.4  | 502.7  | 553.8  | 485.4  | 434.1  | 0.114228077 | 431.65   | 494      | 62.35   | 0.873785425 | 0.1174  | 1.145  |
| 104011_at | 89.8   | 108.2  | 97.6   | 55.6   | 119.9  | 118    | 120.2  | 91.1   | 0.126806722 | 87.8     | 112.3    | 24.5    | 0.781834372 | 0.1475  | 1.31   |
| 104012_at | 3.5    | 5      | 6.6    | 1.5    | 7.8    | 1.6    | 4.3    | 3.4    | 0.943717365 | 4.15     | 4.275    | 0.125   | 0.970760234 | 0.9858  | -1.009 |
| 104013_at | 4.1    | 5.9    | 7.7    | 4.3    | 5.4    | 3.6    | 2.8    | 7.3    | 0.599316828 | 5.5      | 4.775    | 0.725   | 1.151832461 | 0.5222  | -1.193 |
| 104014_at | 352.5  | 290    | 274    | 354.4  | 273    | 332.7  | 289.1  | 439.9  | 0.726844675 | 317.725  | 333.675  | 15.95   | 0.952198996 | 0.7727  | -1.039 |
| 104015_at | 1475.4 | 1112.3 | 1338.8 | 1260.9 | 968.1  | 1201.4 | 1138   | 1305.8 | 0.215928743 | 1296.85  | 1153.325 | 143.525 | 1.124444541 | 0.2212  | -1.125 |
| 104016_at | 92.3   | 62.8   | 111.7  | 97.1   | 117.9  | 109.2  | 147.7  | 113.3  | 0.061851246 | 90.975   | 122.025  | 31.05   | 0.745543946 | 0.0712  | 1.36   |
| 104017_at | 102    | 57.8   | 57.8   | 67.5   | 85.6   | 110.7  | 57.5   | 60.1   | 0.674603864 | 71.275   | 78.475   | 7.2     | 0.908251035 | 0.6824  | -1.092 |
| 104018_at | 33.3   | 54.2   | 54.6   | 55.7   | 48.9   | 46.7   | 48.1   | 56     | 0.938559344 | 49.45    | 49.925   | 0.475   | 0.990485729 | 0.8344  | -1.029 |
| 104019_at | 396.5  | 463.6  | 373.9  | 419.4  | 278.3  | 462.9  | 372.5  | 499    | 0.857333511 | 413.35   | 403.175  | 10.175  | 1.02523718  | 0.7496  | -1.047 |
| 104020_at | 208.8  | 288.4  | 275.3  | 472.2  | 319    | 386.1  | 287.7  | 433.6  | 0.518753017 | 311.175  | 356.6    | 45.425  | 0.872616377 | 0.4168  | 1.184  |
| 104021_at | 10.1   | 22.1   | 14.5   | 18.6   | 26.7   | 14.9   | 29.3   | 27.3   | 0.0983707   | 16.325   | 24.55    | 8.225   | 0.66496945  | 0.1209  | 1.518  |
| 104022_at | 340    | 216.3  | 351.7  | 304.8  | 367.5  | 337.3  | 369.5  | 266.7  | 0.443447351 | 303.2    | 335.25   | 32.05   | 0.904399702 | 0.4479  | 1.116  |
| 104023_at | 203.7  | 162.2  | 204.3  | 116.7  | 225    | 159.1  | 205.7  | 183.8  | 0.426952587 | 171.725  | 193.4    | 21.675  | 0.887926577 | 0.407   | 1.145  |
| 104024_at | 3.8    | 14.5   | 12.2   | 12.4   | 1.6    | 7.8    | 20.5   | 15.3   | 0.909158273 | 10.725   | 11.3     | 0.575   | 0.949115044 | 0.7794  | -1.21  |
| 104025_at | 455.3  | 451.9  | 359.8  | 409.6  | 487.9  | 401.1  | 399.5  | 431.7  | 0.732554856 | 419.15   | 430.05   | 10.9    | 0.97465411  | 0.724   | -1.027 |
| 104029_at | 92.8   | 90.8   | 145.5  | 91.7   | 86.7   | 133    | 116.6  | 122.9  | 0.588558063 | 105.2    | 114.8    | 9.6     | 0.916376307 | 0.5417  | -1.101 |
| 104030_at | 1165.5 | 1696.6 | 1254.7 | 1736.8 | 940.7  | 1348.2 | 1459.5 | 1573.4 | 0.534834548 | 1463.4   | 1330.45  | 132.95  | 1.099928596 | 0.5461  | -1.103 |
| 104031_at | 214.8  | 227.5  | 260.5  | 248.9  | 181.7  | 225.6  | 141.9  | 182.1  | 0.040448592 | 237.925  | 182.825  | 55.1    | 1.301381102 | 0.03913 | -1.315 |
| 104032_at | 10.4   | 43.5   | 15.9   | 20.7   | 22.2   | 18.2   | 63.9   | 21     | 0.534585188 | 22.625   | 31.325   | 8.7     | 0.72226656  | 0.4706  | 1.378  |
| 104033_at | 790.6  | 968.8  | 737.1  | 761.3  | 1159.9 | 813.7  | 828.1  | 883.8  | 0.316993927 | 814.45   | 921.375  | 106.925 | 0.883950617 | 0.2918  | 1.126  |
| 104034_at | 55.6   | 73.9   | 63.4   | 53.7   | 49.3   | 69.1   | 68     | 81.7   | 0.53473835  | 61.65    | 67.025   | 5.375   | 0.919806043 | 0.5769  | -1.078 |
| 104035_at | 194.7  | 223.3  | 185.1  | 351    | 180.1  | 300.6  | 234    | 371.1  | 0.580815995 | 238.525  | 271.45   | 32.925  | 0.878706944 | 0.573   | 1.136  |
| 104036_at | 285    | 317.7  | 314.8  | 292.7  | 347.6  | 334.6  | 337.3  | 324.8  | 0.016826078 | 302.55   | 336.075  | 33.525  | 0.900245481 | 0.01278 | -1.112 |
| 104037_at | 233.2  | 158    | 173.1  | 226    | 94.2   | 177.9  | 101.9  | 118.1  | 0.031493134 | 197.575  | 123.025  | 74.55   | 1.605974395 | 0.02854 | -1.635 |
| 104038_at | 1577.9 | 1228.9 | 1426.2 | 1552.2 | 859.7  | 1571.7 | 1202.4 | 1614.5 | 0.525663584 | 1446.3   | 1312.075 | 134.225 | 1.102299792 | 0.4638  | -1.131 |
| 104039_at | 160.9  | 93.7   | 135.4  | 131.1  | 73     | 129.5  | 104.7  | 114.5  | 0.224216844 | 130.275  | 105.425  | 24.85   | 1.235712592 | 0.2464  | -1.24  |
| 104040_at | 42.1   | 37.1   | 17.3   | 30.5   | 86.1   | 46.2   | 33.9   | 29.6   | 0.284835952 | 31.75    | 48.95    | 17.2    | 0.648621042 | 0.249   | 1.483  |
| 104041_at | 1006.9 | 1811.9 | 1459   | 1471.4 | 1643.6 | 1650.1 | 1541.6 | 2009.1 | 0.217722702 | 1437.3   | 1711.1   | 273.8   | 0.839985974 | 0.2075  | 1.21   |
| 104042_at | 1087.5 | 1030.4 | 1067.5 | 944.3  | 1251.9 | 973.6  | 958.9  | 1210.5 | 0.470613121 | 1032.425 | 1098.725 | 66.3    | 0.93965733  | 0.4923  | -1.058 |
| 104044_at | 429.8  | 586.1  | 565.3  | 447.2  | 745.9  | 490.2  | 605.9  | 546    | 0.238495301 | 507.1    | 597      | 89.9    | 0.849413735 | 0.2285  | 1.174  |
| 104045_at | 97.5   | 136    | 118.6  | 61.3   | 120.8  | 176.3  | 88.1   | 67.6   | 0.74427171  | 103.35   | 113.2    | 9.85    | 0.912985866 | 0.8087  | -1.071 |
| 104046_at | 781    | 851    | 563.3  | 1226.8 | 1584.2 | 1223.4 | 1292.1 | 967.8  | 0.070927672 | 855.525  | 1266.875 | 411.35  | 0.675303404 | 0.07046 | 1.516  |
| 104047_at | 1214.3 | 889.5  | 1124   | 1167.1 | 747.3  | 1150.9 | 1008.2 | 1241.5 | 0.653309083 | 1098.725 | 1036.975 | 61.75   | 1.059548205 | 0.6211  | -1.071 |
| 104048_at | 285.9  | 300.8  | 286.9  | 256.6  | 208.4  | 300    | 295.5  | 320.9  | 0.962019579 | 282.55   | 281.2    | 1.35    | 1.004800853 | 0.8781  | -1.017 |
| 104049_at | 182.9  | 157.2  | 142.8  | 177.3  | 161.7  | 152    | 141.6  | 226    | 0.814273419 | 165.05   | 170.325  | 5.275   | 0.969029796 | 0.8746  | -1.02  |
| 104050_at | 3282   | 3055.4 | 2980.5 | 3179.4 | 3447.3 | 3038.2 | 4058.4 | 3602.8 | 0.143573233 | 3124.325 | 3536.675 | 412.35  | 0.883407438 | 0.1092  | 1.127  |
| 104052_at | 1624.2 | 1199.9 | 1407.9 | 1110.9 | 1050.3 | 1276.8 | 1234.5 | 1387   | 0.496029976 | 1335.725 | 1237.15  | 98.575  | 1.079679101 | 0.5162  | -1.073 |
| 104053_at | 445.4  | 643.4  | 592.7  | 581.5  | 668.9  | 617.2  | 577.9  | 742.2  | 0.172807093 | 565.75   | 651.55   | 85.8    | 0.86831402  | 0.1803  | 1.157  |
| 104055_at | 3      | 10.9   | 4.1    | 19.5   | 18.6   | 7.5    | 38.3   | 4.3    | 0.409881754 | 9.375    | 17.175   | 7.8     | 0.545851528 | 0.4342  | 1.723  |
| 104056_at | 902.9  | 798.6  | 864.9  | 859.5  | 947.4  | 1216.5 | 1252.2 | 916.7  | 0.078080955 | 856.475  | 1083.2   | 226.725 | 0.790689623 | 0.03842 | 1.253  |
| 104057_at | 822.2  | 628.1  | 717.6  | 639.6  | 571.9  | 674.7  | 667.1  | 679.1  | 0.347621853 | 701.875  | 648.2    | 53.675  | 1.082806233 | 0.3465  | -1.079 |
| 104058_at | 1054.8 | 1060.8 | 1195.1 | 1106.3 | 1016   | 1168   | 1229.4 | 1207.3 | 0.418160738 | 1104.25  | 1155.175 | 50.925  | 0.95591577  | 0.4332  | -1.045 |



|             |        |        |        |        |        |        |        |        |             |          |          |         |             |          |        |
|-------------|--------|--------|--------|--------|--------|--------|--------|--------|-------------|----------|----------|---------|-------------|----------|--------|
| 104059_at   | 1176.6 | 1176.7 | 843.6  | 1205.4 | 1359.4 | 963.2  | 1127.6 | 1214.3 | 0.602706826 | 1100.575 | 1166.125 | 65.55   | 0.943788187 | 0.6085   | -1.062 |
| 104060_at   | 820.8  | 547.8  | 625.8  | 570.1  | 519.7  | 553.5  | 541.5  | 361.2  | 0.107837976 | 641.125  | 493.975  | 147.15  | 1.297889569 | 0.1016   | -1.3   |
| 104063_at   | 556    | 381    | 400.9  | 492.5  | 278.1  | 384.6  | 331.5  | 298.8  | 0.037427004 | 457.6    | 323.25   | 134.35  | 1.415622583 | 0.02289  | -1.409 |
| 104064_at   | 154.7  | 170.4  | 152.5  | 156.4  | 274.3  | 229.4  | 285.2  | 187    | 0.029977062 | 158.5    | 243.975  | 85.475  | 0.649656727 | 0.005695 | 1.52   |
| 104065_at   | 28     | 36.6   | 35.2   | 39.4   | 49.1   | 52.5   | 29.7   | 36     | 0.297533277 | 34.8     | 41.825   | 7.025   | 0.832038255 | 0.3189   | 1.18   |
| 104066_at   | 424.6  | 981.2  | 769.1  | 758.8  | 1274.5 | 789.9  | 1113.2 | 934.8  | 0.108198917 | 733.425  | 1028.1   | 294.675 | 0.713379049 | 0.1267   | 1.441  |
| 104067_at   | 509.1  | 507.6  | 502.2  | 574.7  | 476.2  | 579.6  | 542.4  | 649.4  | 0.387230043 | 523.4    | 561.9    | 38.5    | 0.93148247  | 0.3941   | -1.069 |
| 104068_at   | 144.9  | 125.1  | 134.2  | 51.2   | 154    | 92.7   | 151.4  | 116.6  | 0.589835299 | 113.85   | 128.675  | 14.825  | 0.884787255 | 0.5403   | 1.193  |
| 104069_at   | 1713.7 | 2175.7 | 2133.3 | 2033.2 | 2309.9 | 2083.2 | 2497.6 | 2391.7 | 0.067136646 | 2013.975 | 2320.6   | 306.625 | 0.867868224 | 0.07445  | 1.155  |
| 104070_at   | 530.3  | 505.2  | 496.5  | 618.1  | 465.4  | 511    | 499.7  | 554.8  | 0.411050016 | 537.525  | 507.725  | 29.8    | 1.05869319  | 0.4044   | -1.057 |
| 104071_at   | 794.1  | 1152.3 | 841.3  | 959.5  | 1014.2 | 1140.6 | 1077.2 | 1380.3 | 0.104175203 | 936.8    | 1153.075 | 216.275 | 0.812436312 | 0.09378  | 1.235  |
| 104072_at   | 18     | 46.9   | 39.7   | 27.3   | 14.1   | 31.2   | 41.6   | 17.4   | 0.474423008 | 32.975   | 26.075   | 6.9     | 1.264621285 | 0.4531   | -1.302 |
| 104073_at   | 39.5   | 28.8   | 39.5   | 33.9   | 10     | 38.8   | 11.1   | 18.4   | 0.093245534 | 35.425   | 19.575   | 15.85   | 1.809706258 | 0.05969  | -2.091 |
| 104074_at   | 249.8  | 481.5  | 351.9  | 282.5  | 419.1  | 363.9  | 393.1  | 368    | 0.454668534 | 341.425  | 386.025  | 44.6    | 0.884463441 | 0.3394   | 1.166  |
| 104076_at   | 655.5  | 612    | 568.5  | 545.1  | 806.4  | 630.7  | 708.4  | 429    | 0.598100622 | 595.275  | 643.625  | 48.35   | 0.924878617 | 0.7149   | -1.056 |
| 104077_at   | 1158.9 | 1095.4 | 1168   | 1046.4 | 1247.9 | 934.1  | 985.4  | 952.5  | 0.33207435  | 1117.175 | 1029.975 | 87.2    | 1.084662249 | 0.2705   | -1.091 |
| 104078_g_at | 1167.4 | 989.8  | 1074.1 | 832    | 1063.6 | 971    | 1036   | 899.1  | 0.783177097 | 1015.825 | 992.425  | 23.4    | 1.023578608 | 0.8348   | -1.018 |
| 104079_at   | 1161.7 | 1574.2 | 1495.8 | 1288.3 | 1362.5 | 1266.8 | 1106.5 | 1685.2 | 0.878169252 | 1380     | 1355.25  | 24.75   | 1.018262313 | 0.8461   | -1.023 |
| 104080_at   | 1163.8 | 1355.4 | 1215.7 | 1068.5 | 1394.4 | 1221.6 | 1337.5 | 1562.5 | 0.104759661 | 1200.85  | 1379     | 178.15  | 0.870812183 | 0.1001   | 1.148  |
| 104082_at   | 696.6  | 1058.1 | 972.1  | 938.8  | 676.1  | 1009.6 | 760.2  | 906.5  | 0.493449884 | 916.4    | 838.1    | 78.3    | 1.093425606 | 0.5095   | -1.094 |
| 104083_at   | 762    | 1459   | 871.3  | 933.8  | 1696   | 1120.9 | 1366.1 | 1486   | 0.083870174 | 1006.525 | 1417.25  | 410.725 | 0.710195802 | 0.07073  | 1.437  |
| 104085_at   | 755.7  | 455.2  | 639    | 715.1  | 644.7  | 616.5  | 621.3  | 558.6  | 0.680360719 | 641.25   | 610.275  | 30.975  | 1.050755807 | 0.7903   | -1.033 |
| 104086_at   | 13.5   | 6.4    | 19.9   | 11.9   | 24.1   | 14.8   | 14.4   | 17.5   | 0.231531354 | 12.925   | 17.7     | 4.775   | 0.730225989 | 0.2098   | 1.448  |
| 104087_at   | 650.7  | 637.3  | 672.2  | 537.4  | 680.4  | 713.2  | 561.2  | 693.2  | 0.440449456 | 624.4    | 662      | 37.6    | 0.943202417 | 0.464    | -1.06  |
| 104088_at   | 602.3  | 573.7  | 576.8  | 572.4  | 761.9  | 426.3  | 656.6  | 565.7  | 0.784603279 | 581.3    | 602.625  | 21.325  | 0.964613151 | 0.9144   | -1.014 |
| 104089_at   | 498.2  | 352.2  | 372.7  | 414.7  | 431.1  | 489.5  | 459.4  | 437.7  | 0.267430241 | 409.45   | 454.425  | 44.975  | 0.901028773 | 0.2188   | -1.118 |
| 104090_at   | 928.6  | 558.1  | 700.4  | 1027.5 | 413.3  | 741.6  | 578    | 1037.5 | 0.540251171 | 803.65   | 692.6    | 111.05  | 1.160337857 | 0.4869   | -1.193 |
| 104091_at   | 1002.9 | 1893.3 | 1549.5 | 1475   | 1225.4 | 1551.1 | 1658.7 | 1716.9 | 0.79759283  | 1480.175 | 1538.025 | 57.85   | 0.962386827 | 0.7305   | -1.057 |
| 104092_at   | 767.4  | 1062.7 | 1108.8 | 1134.1 | 844.8  | 1135.7 | 1023.6 | 1342.4 | 0.629840265 | 1018.25  | 1086.625 | 68.375  | 0.937075808 | 0.6542   | -1.065 |
| 104093_at   | 2069.1 | 3333.2 | 3123.1 | 2653.9 | 3865.8 | 2901.9 | 2978.3 | 3723.4 | 0.178358976 | 2794.825 | 3367.35  | 572.525 | 0.829977579 | 0.1842   | 1.215  |
| 104094_at   | 777.6  | 1289.3 | 1010   | 1284.4 | 1338.8 | 964.3  | 1112.9 | 1204.5 | 0.675393138 | 1090.325 | 1155.125 | 64.8    | 0.943902175 | 0.6251   | -1.074 |
| 104095_at   | 408.6  | 574.1  | 532.5  | 602.6  | 494.7  | 497.6  | 581.9  | 541.3  | 0.990878976 | 529.45   | 528.875  | 0.575   | 1.001087213 | 0.9403   | -1.007 |
| 104096_at   | 558.6  | 517.6  | 526.6  | 562.4  | 583.7  | 556.3  | 593.5  | 459.3  | 0.843554043 | 541.3    | 548.2    | 6.9     | 0.987413353 | 0.8986   | -1.008 |
| 104097_at   | 963.2  | 712.6  | 786.4  | 878.1  | 562.8  | 655.6  | 642    | 567.9  | 0.017548978 | 835.075  | 607.075  | 228     | 1.375571387 | 0.006343 | -1.37  |
| 104098_at   | 340.4  | 386    | 372.7  | 391.5  | 362    | 391.6  | 393.6  | 369.3  | 0.660400592 | 372.65   | 379.125  | 6.475   | 0.9829212   | 0.6502   | -1.018 |
| 104099_at   | 65.1   | 56.7   | 83.7   | 52.6   | 45.8   | 72.3   | 67.9   | 47.4   | 0.548844568 | 64.525   | 58.35    | 6.175   | 1.105826907 | 0.5252   | -1.111 |
| 104100_at   | 1659.8 | 2570.9 | 2240.3 | 2189.1 | 2235.8 | 2335   | 2792.3 | 2265.4 | 0.335946432 | 2165.025 | 2407.125 | 242.1   | 0.899423586 | 0.3201   | 1.121  |
| 104101_at   | 251.4  | 305    | 420.3  | 349.1  | 314.4  | 406    | 313.1  | 376.5  | 0.641428182 | 331.45   | 352.5    | 21.05   | 0.940283688 | 0.5871   | -1.075 |
| 104102_at   | 379.1  | 559.9  | 417.5  | 447.2  | 517.5  | 532.9  | 540    | 474    | 0.195207681 | 450.925  | 516.1    | 65.175  | 0.873716334 | 0.1518   | 1.155  |
| 104103_at   | 9.7    | 20     | 17.1   | 10.6   | 24.9   | 9.4    | 17.8   | 21.1   | 0.379816389 | 14.35    | 18.3     | 3.95    | 0.784153005 | 0.4384   | 1.259  |
| 104104_at   | 29     | 26.5   | 26     | 26.4   | 31.3   | 39.5   | 47.9   | 40     | 0.030641285 | 26.975   | 39.675   | 12.7    | 0.679899181 | 0.00601  | 1.457  |
| 104105_at   | 628    | 1108   | 786.9  | 855.3  | 810.8  | 846.5  | 865.1  | 964.5  | 0.810040635 | 844.55   | 871.725  | 27.175  | 0.968826178 | 0.6967   | -1.052 |
| 104106_at   | 649.9  | 452.7  | 402.4  | 523.8  | 453    | 578.8  | 351.8  | 667    | 0.952570212 | 507.2    | 512.65   | 5.45    | 0.989368965 | 0.9914   | -1.002 |
| 104108_at   | 901.7  | 1459.5 | 1308.6 | 1058.4 | 1260.5 | 1154.1 | 1209.2 | 1217.7 | 0.836674774 | 1182.05  | 1210.375 | 28.325  | 0.976598162 | 0.7244   | -1.041 |
| 104109_at   | 673    | 963.5  | 897.2  | 1237   | 1036.2 | 1171.6 | 1266   | 1501.1 | 0.096133084 | 942.675  | 1243.725 | 301.05  | 0.757944883 | 0.09543  | 1.338  |
| 104110_at   | 960.8  | 1398   | 1200.6 | 1338   | 886.3  | 1282.8 | 1108.5 | 1136   | 0.378631326 | 1224.35  | 1103.4   | 120.95  | 1.109615733 | 0.4023   | -1.108 |
| 104112_at   | 192.6  | 219.4  | 197.2  | 255.6  | 183.8  | 219.6  | 191.5  | 258.8  | 0.904887734 | 216.2    | 213.425  | 2.775   | 1.013002226 | 0.8806   | -1.016 |
| 104114_at   | 901    | 599.5  | 648.6  | 528.6  | 448.6  | 593.5  | 625.6  | 794.5  | 0.635110171 | 669.425  | 615.55   | 53.875  | 1.087523353 | 0.6256   | -1.088 |
| 104115_at   | 685.1  | 741.7  | 717.1  | 635.9  | 553.6  | 781.3  | 642.7  | 741.1  | 0.798040514 | 694.95   | 679.675  | 15.275  | 1.022473977 | 0.7392   | -1.03  |
| 104116_at   | 428.6  | 347.7  | 349.4  | 349.8  | 337.9  | 381.5  | 415.1  | 408.7  | 0.547610753 | 368.875  | 385.8    | 16.925  | 0.956130119 | 0.5357   | -1.047 |
| 104117_at   | 336    | 335.2  | 288.4  | 342.6  | 396.8  | 330.6  | 307.1  | 371.6  | 0.322836039 | 325.55   | 351.525  | 25.975  | 0.926107674 | 0.3304   | -1.077 |
| 104118_at   | 961.8  | 850.1  | 862    | 870.4  | 744    | 857.3  | 817.3  | 830.5  | 0.081242077 | 886.075  | 812.275  | 73.8    | 1.090855929 | 0.08058  | -1.091 |
| 104119_at   | 691.3  | 900    | 814.8  | 801.4  | 519.5  | 699.9  | 685.1  | 687.4  | 0.044257197 | 801.875  | 647.975  | 153.9   | 1.237509163 | 0.05282  | -1.241 |
| 104120_at   | 603.5  | 440.3  | 527.2  | 459.2  | 603    | 460.9  | 518    | 569.9  | 0.55326571  | 507.55   | 537.95   | 30.4    | 0.943489172 | 0.5358   | -1.063 |
| 104121_at   | 238.3  | 372    | 310.6  | 229.7  | 212.9  | 407.3  | 291.2  | 418.4  | 0.483318406 | 287.65   | 332.45   | 44.8    | 0.865242894 | 0.5375   | 1.137  |
| 104122_at   | 236.1  | 387.3  | 286.3  | 292.9  | 458.3  | 337    | 412.8  | 346.5  | 0.085038467 | 300.65   | 388.65   | 88      | 0.773575196 | 0.07928  | 1.303  |



|             |        |        |        |        |        |        |        |        |             |          |          |         |             |          |        |
|-------------|--------|--------|--------|--------|--------|--------|--------|--------|-------------|----------|----------|---------|-------------|----------|--------|
| 104123_at   | 52.6   | 45.6   | 11.7   | 44.7   | 19.2   | 38.9   | 42     | 88.9   | 0.64166025  | 38.65    | 47.25    | 8.6     | 0.817989418 | 0.6876   | 1.22   |
| 104124_at   | 703.3  | 590.4  | 360.3  | 549.5  | 287.9  | 266.1  | 495    | 354.8  | 0.067938873 | 550.875  | 350.95   | 199.925 | 1.569668044 | 0.06264  | -1.572 |
| 104125_at   | 1557.6 | 1083.9 | 1341.8 | 1617.4 | 1044   | 1172.9 | 1240.8 | 1143.9 | 0.128165405 | 1400.175 | 1150.4   | 249.775 | 1.217120132 | 0.1048   | -1.205 |
| 104126_at   | 963.7  | 732.5  | 904.8  | 848.9  | 538.5  | 836.1  | 768    | 732.1  | 0.127872217 | 862.475  | 718.675  | 143.8   | 1.200090444 | 0.1412   | -1.21  |
| 104128_at   | 451.5  | 459.5  | 472.3  | 434.9  | 520.2  | 570.8  | 520.3  | 379.3  | 0.375164208 | 454.55   | 497.65   | 43.1    | 0.913392947 | 0.4161   | -1.083 |
| 104129_at   | 145.3  | 234.2  | 194.2  | 185.5  | 311.3  | 216.9  | 285.5  | 244.8  | 0.036673695 | 189.8    | 264.625  | 74.825  | 0.717241379 | 0.03784  | 1.401  |
| 104131_at   | 115.4  | 186.4  | 125.3  | 112.4  | 112.1  | 145.8  | 134.1  | 128.9  | 0.816502842 | 134.875  | 130.225  | 4.65    | 1.035707429 | 0.8986   | -1.017 |
| 104132_at   | 781    | 959.5  | 712.6  | 752    | 939.1  | 769.1  | 674.7  | 728.6  | 0.77706463  | 801.275  | 777.875  | 23.4    | 1.030081954 | 0.7592   | -1.031 |
| 104134_at   | 633.2  | 403.6  | 531.8  | 464.8  | 378.8  | 495.5  | 452.2  | 406.2  | 0.239114209 | 508.35   | 433.175  | 75.175  | 1.17354418  | 0.228    | -1.163 |
| 104135_at   | 1102.4 | 986.3  | 1067.4 | 1051   | 1282.1 | 1024.7 | 1108.9 | 953.1  | 0.620294304 | 1051.775 | 1092.2   | 40.425  | 0.962987548 | 0.6492   | -1.033 |
| 104136_at   | 321    | 488.6  | 287.1  | 335.5  | 455.8  | 318.5  | 404.3  | 389.6  | 0.548348093 | 358.05   | 392.05   | 34      | 0.913276368 | 0.4789   | 1.109  |
| 104137_at   | 203.9  | 275.7  | 375.1  | 275.1  | 355.2  | 269.2  | 333.6  | 401.7  | 0.24823354  | 282.45   | 339.925  | 57.475  | 0.830918585 | 0.2349   | 1.219  |
| 104138_at   | 93.3   | 138.3  | 93.6   | 155.4  | 94.8   | 141.1  | 156.3  | 106.8  | 0.83675458  | 120.15   | 124.75   | 4.6     | 0.963126253 | 0.8143   | -1.044 |
| 104139_at   | 703.1  | 463.2  | 550.6  | 518.6  | 464.7  | 488.3  | 422.2  | 412.9  | 0.114141687 | 558.875  | 447.025  | 111.85  | 1.25020972  | 0.06898  | -1.238 |
| 104140_s_at | 2228.4 | 2315.8 | 2578   | 2262.4 | 2525.7 | 2231.2 | 2484.9 | 2549.3 | 0.383647435 | 2346.15  | 2447.775 | 101.625 | 0.958482704 | 0.3813   | -1.044 |
| 104141_at   | 376.9  | 450.9  | 382.8  | 441.3  | 364.3  | 438.6  | 495.3  | 557.2  | 0.321385147 | 412.975  | 463.85   | 50.875  | 0.890320147 | 0.3339   | 1.113  |
| 104142_at   | 363.4  | 305.1  | 324    | 306.5  | 294    | 302.2  | 243.9  | 253.6  | 0.041628647 | 324.75   | 273.425  | 51.325  | 1.187711438 | 0.04099  | -1.19  |
| 104143_at   | 1012.7 | 1085   | 1100   | 1014   | 1468   | 1140.8 | 1218.4 | 1173.6 | 0.071706073 | 1052.925 | 1250.2   | 197.275 | 0.842205247 | 0.03323  | 1.182  |
| 104144_at   | 471.6  | 770.5  | 631.7  | 649.8  | 594.9  | 746    | 747.5  | 687    | 0.417797801 | 630.9    | 693.85   | 62.95   | 0.909274339 | 0.393    | -1.112 |
| 104145_at   | 447.5  | 575.1  | 495    | 585.1  | 568.7  | 431.1  | 586    | 528.4  | 0.954011729 | 525.675  | 528.55   | 2.875   | 0.99456059  | 0.9633   | -1.005 |
| 104146_at   | 144.3  | 136    | 104.4  | 83.9   | 113.4  | 154.6  | 157.4  | 135.6  | 0.235300445 | 117.15   | 140.25   | 23.1    | 0.835294118 | 0.2326   | 1.215  |
| 104147_at   | 883.4  | 768.4  | 976.8  | 826.4  | 1137.3 | 904.8  | 940.8  | 773.8  | 0.428085903 | 863.75   | 939.175  | 75.425  | 0.919690154 | 0.438    | -1.081 |
| 104148_at   | 887.5  | 933    | 1058.6 | 802.5  | 1048.7 | 862    | 1159.4 | 938.8  | 0.369261273 | 920.4    | 1002.225 | 81.825  | 0.918356656 | 0.3698   | -1.088 |
| 104149_at   | 665.9  | 485.7  | 662.9  | 797    | 444.5  | 461.8  | 404.3  | 535.1  | 0.050247561 | 652.875  | 461.425  | 191.45  | 1.414910332 | 0.0292   | -1.401 |
| 104150_at   | 320.2  | 444.2  | 396.5  | 491.6  | 351.5  | 455.4  | 315.4  | 392.5  | 0.495199827 | 413.125  | 378.7    | 34.425  | 1.09090309  | 0.5137   | -1.088 |
| 104151_at   | 310.8  | 272.8  | 316    | 383.9  | 349.1  | 358.5  | 332    | 382.1  | 0.241936813 | 320.875  | 355.425  | 34.55   | 0.902792432 | 0.2046   | -1.115 |
| 104152_at   | 1000.1 | 1314.5 | 1126.8 | 1318.6 | 1793.8 | 1401.2 | 1627.3 | 1270.2 | 0.061009407 | 1190     | 1523.125 | 333.125 | 0.781288469 | 0.05303  | 1.277  |
| 104153_at   | 439.8  | 379.8  | 440.2  | 443.9  | 385.6  | 455.5  | 443.2  | 539.4  | 0.439321275 | 425.925  | 455.925  | 30      | 0.934199704 | 0.453    | -1.065 |
| 104154_at   | 1155.9 | 1194.4 | 922.5  | 1089.2 | 740.9  | 1218.6 | 976.1  | 1064.3 | 0.472892217 | 1090.5   | 999.975  | 90.525  | 1.090527263 | 0.4451   | -1.103 |
| 104155_f_at | 153.4  | 159.2  | 191.2  | 182    | 179.5  | 200.1  | 211.9  | 173    | 0.173956637 | 171.45   | 191.125  | 19.675  | 0.8970569   | 0.172    | 1.116  |
| 104156_r_at | 81.9   | 101.3  | 56.5   | 32.2   | 24.5   | 78.5   | 59     | 24.3   | 0.329633689 | 67.975   | 46.575   | 21.4    | 1.459473967 | 0.3208   | -1.529 |
| 104157_at   | 233.1  | 207.1  | 212.9  | 240.1  | 207.5  | 187.2  | 198.2  | 216.9  | 0.08764903  | 223.3    | 202.45   | 20.85   | 1.102988392 | 0.08504  | -1.103 |
| 104158_at   | 680.1  | 479.5  | 486.6  | 494.1  | 520.6  | 533.3  | 581.2  | 621.5  | 0.61490564  | 535.075  | 564.15   | 29.075  | 0.948462288 | 0.5342   | -1.063 |
| 104159_at   | 14.5   | 7.1    | 6.5    | 15.2   | 10.6   | 5.8    | 19.3   | 4.6    | 0.860588628 | 10.825   | 10.075   | 0.75    | 1.074441687 | 0.7101   | -1.166 |
| 104160_at   | 171.8  | 133.1  | 168.8  | 180.1  | 117.9  | 153.3  | 147.7  | 161.7  | 0.242363319 | 163.45   | 145.15   | 18.3    | 1.126076473 | 0.2655   | -1.127 |
| 104161_at   | 179.7  | 236    | 189.1  | 243.3  | 199.6  | 176.9  | 266.5  | 260.1  | 0.635766231 | 212.025  | 225.775  | 13.75   | 0.93909866  | 0.67     | -1.058 |
| 104163_at   | 525.3  | 609    | 577.5  | 601.9  | 739.8  | 640.8  | 828.1  | 639.6  | 0.05242987  | 578.425  | 712.075  | 133.65  | 0.812309097 | 0.02825  | 1.226  |
| 104164_at   | 348.9  | 524.6  | 477.5  | 413.7  | 420.3  | 447.9  | 481.1  | 489.3  | 0.678529613 | 441.175  | 459.65   | 18.475  | 0.959806374 | 0.6136   | -1.052 |
| 104165_at   | 1124.4 | 839.2  | 918    | 954.4  | 884.5  | 1070.6 | 896.1  | 1203.5 | 0.594935706 | 959      | 1013.675 | 54.675  | 0.946062594 | 0.6027   | -1.054 |
| 104166_at   | 39.4   | 38     | 62.5   | 48.2   | 147.3  | 126.5  | 46.2   | 41     | 0.21155621  | 47.025   | 90.25    | 43.225  | 0.521052632 | 0.1941   | 1.672  |
| 104168_at   | 241.5  | 172.3  | 187.7  | 154.4  | 178.3  | 250.9  | 131.6  | 120.9  | 0.618821875 | 188.975  | 170.425  | 18.55   | 1.108845533 | 0.5158   | -1.141 |
| 104169_at   | 9.2    | 7.2    | 7.1    | 7.4    | 21.9   | 4.4    | 4.6    | 17.8   | 0.397445042 | 7.725    | 12.175   | 4.45    | 0.63449692  | 0.6558   | 1.226  |
| 104170_at   | 257.7  | 378.6  | 347.9  | 469.2  | 440.7  | 407.4  | 431.2  | 484.9  | 0.173816935 | 363.35   | 441.05   | 77.7    | 0.823829498 | 0.1484   | 1.239  |
| 104171_f_at | 71.5   | 114    | 89.8   | 31.2   | 104    | 87.8   | 29     | 27.9   | 0.603706702 | 76.625   | 62.175   | 14.45   | 1.232408524 | 0.5545   | -1.325 |
| 104172_at   | 133.7  | 108.3  | 133.9  | 71.5   | 156.1  | 120    | 140    | 137.9  | 0.174390488 | 111.85   | 138.5    | 26.65   | 0.807581227 | 0.1781   | 1.271  |
| 104173_at   | 240.1  | 132.6  | 165.3  | 123.8  | 191.2  | 158.8  | 130.3  | 194    | 0.922367597 | 165.45   | 168.575  | 3.125   | 0.981462257 | 0.8231   | -1.042 |
| 104174_at   | 57     | 47.3   | 25.7   | 38.3   | 11.4   | 64.5   | 59.9   | 47.7   | 0.794010477 | 42.075   | 45.875   | 3.8     | 0.917166213 | 0.8968   | -1.062 |
| 104175_at   | 20.8   | 25.3   | 24.4   | 17.4   | 76.5   | 66.4   | 78.5   | 48.5   | 0.005120899 | 21.975   | 67.475   | 45.5    | 0.325676176 | 0.000204 | 3.05   |
| 104176_at   | 185    | 218.6  | 184.7  | 198.6  | 245.7  | 197.4  | 198.3  | 196.7  | 0.415173376 | 196.725  | 209.525  | 12.8    | 0.938909438 | 0.4033   | -1.063 |
| 104177_at   | 63.8   | 30.3   | 35     | 85.1   | 13.3   | 79     | 80.2   | 76     | 0.694707641 | 53.55    | 62.125   | 8.575   | 0.861971831 | 0.9611   | -1.026 |
| 104179_at   | 179.4  | 248.3  | 186.7  | 160.6  | 112.1  | 191.7  | 142.4  | 140.6  | 0.111831919 | 193.75   | 146.7    | 47.05   | 1.320722563 | 0.09657  | -1.328 |
| 104180_at   | 47.3   | 89.9   | 64.6   | 48.5   | 105.7  | 101    | 113.7  | 104.3  | 0.018209206 | 62.575   | 106.175  | 43.6    | 0.589357193 | 0.01008  | 1.755  |
| 104181_at   | 25.5   | 46.3   | 24.8   | 38.8   | 80.8   | 14     | 67.7   | 34.2   | 0.400863789 | 33.85    | 49.175   | 15.325  | 0.688357905 | 0.642    | 1.233  |
| 104182_at   | 12.2   | 11.3   | 19.6   | 12.6   | 19.8   | 16.5   | 15.9   | 17.4   | 0.169689784 | 13.925   | 17.4     | 3.475   | 0.800287356 | 0.1184   | 1.275  |
| 104183_at   | 440.3  | 427.1  | 373.7  | 392.3  | 379.7  | 418.2  | 428.2  | 375.3  | 0.708322312 | 408.35   | 400.35   | 8       | 1.019982515 | 0.7131   | -1.02  |
| 104184_at   | 42.7   | 52.2   | 70.4   | 55.9   | 66     | 58.9   | 45.9   | 81.3   | 0.442261294 | 55.3     | 63.025   | 7.725   | 0.877429591 | 0.4555   | 1.134  |



|             |        |        |        |        |        |        |        |        |             |          |          |         |             |         |        |
|-------------|--------|--------|--------|--------|--------|--------|--------|--------|-------------|----------|----------|---------|-------------|---------|--------|
| 104185_at   | 91.4   | 29.2   | 128.4  | 117.9  | 121.8  | 47.1   | 99.5   | 149.2  | 0.697143405 | 91.725   | 104.4    | 12.675  | 0.878591954 | 0.6766  | 1.205  |
| 104186_at   | 168.7  | 124.5  | 166.5  | 146.5  | 201.1  | 128.8  | 140.5  | 98.1   | 0.712438187 | 151.55   | 142.125  | 9.425   | 1.066314864 | 0.6017  | -1.095 |
| 104187_at   | 263.5  | 343.6  | 248.2  | 260    | 303.1  | 278.2  | 336.4  | 344.9  | 0.222630553 | 278.825  | 315.65   | 36.825  | 0.883335973 | 0.1962  | 1.138  |
| 104188_at   | 283    | 514.8  | 396    | 450.2  | 534.9  | 321.1  | 418.6  | 543.6  | 0.568142876 | 411      | 454.55   | 43.55   | 0.904190958 | 0.5877  | 1.108  |
| 104189_at   | 439.7  | 368.4  | 352.7  | 358.3  | 241.1  | 353.8  | 380.2  | 349.8  | 0.242829785 | 379.775  | 331.225  | 48.55   | 1.1465771   | 0.245   | -1.159 |
| 104190_at   | 136.4  | 159.2  | 136.7  | 131.5  | 101.2  | 152.4  | 157.6  | 149.5  | 0.959755613 | 140.95   | 140.175  | 0.775   | 1.005528803 | 0.8795  | -1.018 |
| 104191_at   | 31.3   | 18.2   | 63.5   | 25     | 87.9   | 38.3   | 22.4   | 46.8   | 0.438996036 | 34.5     | 48.85    | 14.35   | 0.706243603 | 0.4134  | 1.405  |
| 104192_at   | 181.3  | 135.4  | 160.9  | 193.3  | 138.4  | 241.3  | 85.4   | 91     | 0.497793666 | 167.725  | 139.025  | 28.7    | 1.206437691 | 0.3251  | -1.31  |
| 104193_at   | 1055.4 | 1042   | 977.7  | 1152.8 | 785.2  | 1088.6 | 931.6  | 1270.7 | 0.74956278  | 1056.975 | 1019.025 | 37.95   | 1.037241481 | 0.657   | -1.052 |
| 104194_at   | 485.6  | 420.6  | 481.6  | 521.9  | 382.3  | 429.2  | 469.9  | 572.8  | 0.774898422 | 477.425  | 463.55   | 13.875  | 1.029932046 | 0.7104  | -1.038 |
| 104195_at   | 471.9  | 447.9  | 497.3  | 570    | 774.9  | 404    | 591.1  | 422.6  | 0.603970008 | 496.775  | 548.15   | 51.375  | 0.906275654 | 0.6945  | -1.069 |
| 104196_at   | 831.3  | 787.2  | 723.4  | 950.3  | 710.8  | 684.9  | 673.1  | 883.1  | 0.260594772 | 823.05   | 737.975  | 85.075  | 1.115281683 | 0.2422  | -1.117 |
| 104197_at   | 149.1  | 149.4  | 150.5  | 81     | 83.3   | 203.9  | 152.2  | 237.5  | 0.379970663 | 132.5    | 169.225  | 36.725  | 0.782981238 | 0.4902  | 1.226  |
| 104198_at   | 108.5  | 97.4   | 72.4   | 88.6   | 30.7   | 76.4   | 63.6   | 125.8  | 0.453560146 | 91.725   | 74.125   | 17.6    | 1.237436762 | 0.3317  | -1.38  |
| 104199_at   | 225.8  | 207.5  | 218.1  | 247.3  | 196.7  | 194.7  | 219.3  | 275.4  | 0.885630274 | 224.675  | 221.525  | 3.15    | 1.014219614 | 0.8102  | -1.023 |
| 104200_at   | 154.9  | 155.4  | 160.8  | 137    | 159.2  | 200.9  | 122.8  | 187.6  | 0.442086143 | 152.025  | 167.625  | 15.6    | 0.906935123 | 0.502   | -1.086 |
| 104201_at   | 643.2  | 347.3  | 535.3  | 541.3  | 251.3  | 185.7  | 213.1  | 481.5  | 0.043411733 | 516.775  | 282.9    | 233.875 | 1.82670555  | 0.03951 | -1.917 |
| 104202_at   | 191.1  | 287.5  | 199.3  | 211.5  | 226.4  | 253.6  | 206.4  | 233.8  | 0.765550475 | 222.35   | 230.05   | 7.7     | 0.966529015 | 0.6742  | -1.046 |
| 104205_at   | 19.2   | 92.8   | 44.5   | 64.2   | 20.7   | 42.5   | 47.1   | 54.3   | 0.4571996   | 55.175   | 41.15    | 14.025  | 1.340826245 | 0.6288  | -1.226 |
| 104206_at   | 67.2   | 45.1   | 50.8   | 56.5   | 13.2   | 69.7   | 34.5   | 81.5   | 0.770552541 | 54.9     | 49.725   | 5.175   | 1.104072398 | 0.5014  | -1.353 |
| 104207_at   | 17.8   | 42.4   | 26.9   | 28.3   | 56.2   | 38.7   | 64.9   | 58.5   | 0.014687576 | 28.85    | 54.575   | 25.725  | 0.528630325 | 0.01943 | 1.947  |
| 104208_at   | 296.4  | 333.6  | 305.4  | 355.8  | 260.7  | 327.3  | 363.9  | 357.1  | 0.876655647 | 322.8    | 327.25   | 4.45    | 0.986401833 | 0.9312  | -1.008 |
| 104209_at   | 497.9  | 600.8  | 572    | 595    | 657.2  | 592.1  | 619.1  | 598.7  | 0.130260247 | 566.425  | 616.775  | 50.35   | 0.918365693 | 0.1279  | 1.091  |
| 104210_at   | 64.8   | 67.6   | 71     | 31.8   | 117.7  | 32.9   | 97.9   | 121.8  | 0.205282382 | 58.8     | 92.575   | 33.775  | 0.635160681 | 0.33    | 1.47   |
| 104211_at   | 110.9  | 101.5  | 128.2  | 106.8  | 114.9  | 107.5  | 90.1   | 148.4  | 0.814363797 | 111.85   | 115.225  | 3.375   | 0.970709481 | 0.8857  | -1.017 |
| 104212_at   | 909.7  | 636.8  | 660.9  | 647.8  | 519.6  | 949    | 778.9  | 1084.6 | 0.431120794 | 713.8    | 833.025  | 119.225 | 0.856877045 | 0.5021  | 1.138  |
| 104213_at   | 79.2   | 111.5  | 102.3  | 127.2  | 104    | 96.6   | 84.8   | 126.4  | 0.879981252 | 105.05   | 102.95   | 2.1     | 1.020398252 | 0.9056  | -1.016 |
| 104214_at   | 188.6  | 140.6  | 124.1  | 140.3  | 152.7  | 240.1  | 195.6  | 193.7  | 0.085422136 | 148.4    | 195.525  | 47.125  | 0.758982227 | 0.07553 | 1.317  |
| 104215_at   | 129.6  | 152.7  | 127.7  | 158.3  | 110.7  | 148.1  | 145.8  | 127.7  | 0.472928986 | 142.075  | 133.075  | 9       | 1.067631035 | 0.4704  | -1.07  |
| 104216_at   | 173.2  | 103.9  | 151.3  | 140.3  | 61.3   | 123.6  | 92.1   | 123.1  | 0.088491361 | 142.175  | 100.025  | 42.15   | 1.421394651 | 0.1076  | -1.452 |
| 104217_at   | 143.9  | 122.6  | 141.1  | 117.9  | 186.3  | 118.2  | 127.1  | 210.5  | 0.290033769 | 131.375  | 160.525  | 29.15   | 0.818408348 | 0.2895  | 1.19   |
| 104218_s_at | 262.3  | 272.5  | 240.3  | 278.4  | 248.2  | 323.4  | 194.6  | 191.5  | 0.5019254   | 263.375  | 239.425  | 23.95   | 1.100031325 | 0.3929  | -1.124 |
| 104219_f_at | 77.2   | 72.5   | 71.5   | 69.7   | 65     | 79.1   | 51.5   | 70.3   | 0.364444922 | 72.725   | 66.475   | 6.25    | 1.094020308 | 0.3181  | -1.106 |
| 104220_at   | 190.1  | 382.5  | 289.6  | 281.3  | 328.9  | 419.4  | 379    | 366.1  | 0.110055975 | 285.875  | 373.35   | 87.475  | 0.765702424 | 0.1026  | 1.341  |
| 104221_at   | 2014.9 | 3561.4 | 2939.9 | 2591.3 | 1520.8 | 2070.5 | 1719.2 | 1986   | 0.053375977 | 2776.875 | 1824.125 | 952.75  | 1.522305215 | 0.02622 | -1.502 |
| 104222_f_at | 408.6  | 343.5  | 358.5  | 357.2  | 248.5  | 370.6  | 254    | 293.6  | 0.069195906 | 366.95   | 291.675  | 75.275  | 1.258078341 | 0.05193 | -1.272 |
| 104225_at   | 231.6  | 380.2  | 297.8  | 461.5  | 283.6  | 399.4  | 235    | 298    | 0.549268673 | 342.775  | 304      | 38.775  | 1.127549342 | 0.5895  | -1.112 |
| 104227_at   | 73.7   | 99.1   | 123.1  | 77.3   | 67.4   | 104.6  | 45     | 81.5   | 0.312465638 | 93.3     | 74.625   | 18.675  | 1.250251256 | 0.2929  | -1.28  |
| 104228_at   | 5.8    | 9.6    | 8.2    | 8.4    | 51.7   | 19.5   | 7.8    | 50.6   | 0.11480372  | 8        | 32.4     | 24.4    | 0.24691358  | 0.0466  | 3.192  |
| 104229_at   | 63.2   | 121.3  | 44.4   | 80.9   | 75.9   | 149.2  | 147.6  | 43.2   | 0.433627178 | 77.45    | 103.975  | 26.525  | 0.744890599 | 0.5335  | 1.273  |
| 104230_at   | 158.9  | 94.5   | 134    | 146    | 84.2   | 115.3  | 139.1  | 215.3  | 0.876938148 | 133.35   | 138.475  | 5.125   | 0.962989709 | 0.9907  | -1.003 |
| 104231_at   | 1267   | 903.3  | 1104   | 1022.4 | 710.1  | 1053.4 | 844.8  | 1052   | 0.211233079 | 1074.175 | 915.075  | 159.1   | 1.17386553  | 0.2117  | -1.181 |
| 104232_at   | 29.7   | 63.8   | 5.7    | 25.6   | 89.1   | 54.9   | 65.1   | 22.6   | 0.195725707 | 31.2     | 57.925   | 26.725  | 0.538627536 | 0.2124  | 2.26   |
| 104233_at   | 8.6    | 21.8   | 5.9    | 5.5    | 31.3   | 10.4   | 8.8    | 9.4    | 0.525616303 | 10.45    | 14.975   | 4.525   | 0.697829716 | 0.4288  | 1.446  |
| 104234_at   | 440.9  | 227.3  | 296.9  | 326.3  | 297    | 335.9  | 424.8  | 245.3  | 0.962063985 | 322.85   | 325.75   | 2.9     | 0.991097467 | 0.9271  | -1.017 |
| 104235_at   | 537.6  | 889.1  | 741.6  | 682.1  | 864.1  | 759    | 876.2  | 633.1  | 0.474866843 | 712.6    | 783.1    | 70.5    | 0.909973184 | 0.4582  | -1.107 |
| 104237_at   | 829.4  | 979.5  | 810.6  | 618.9  | 1230.5 | 908.2  | 1024   | 936.4  | 0.083604152 | 809.6    | 1024.775 | 215.175 | 0.790027079 | 0.08442 | 1.273  |
| 104238_at   | 146.4  | 177.7  | 180.2  | 192.1  | 187.1  | 128.4  | 177    | 244.1  | 0.715387502 | 174.1    | 184.15   | 10.05   | 0.945424925 | 0.8146  | -1.036 |
| 104239_at   | 76.9   | 54.1   | 69.1   | 83.2   | 94.5   | 55.8   | 63.4   | 77.6   | 0.856869107 | 70.825   | 72.825   | 2       | 0.972536904 | 0.896   | -1.02  |
| 104240_at   | 25.6   | 37.6   | 23.9   | 60.8   | 11.4   | 30.9   | 43.8   | 33.1   | 0.534531726 | 36.975   | 29.8     | 7.175   | 1.240771812 | 0.5141  | -1.287 |
| 104241_at   | 843.8  | 1515.1 | 1012.5 | 1042   | 1222.2 | 1255.9 | 1206.8 | 1458.8 | 0.305923844 | 1103.35  | 1285.925 | 182.575 | 0.858020491 | 0.2312  | 1.19   |
| 104242_f_at | 697    | 722.7  | 635.4  | 704.2  | 918.8  | 656.5  | 678.5  | 798.6  | 0.319418733 | 689.825  | 763.1    | 73.275  | 0.903977198 | 0.3043  | -1.097 |
| 104243_r_at | 149.3  | 169.3  | 135.8  | 124.1  | 144.4  | 94.2   | 142    | 172.3  | 0.748764039 | 144.625  | 138.225  | 6.4     | 1.04630132  | 0.6833  | -1.064 |
| 104244_at   | 284.2  | 288.7  | 229.5  | 229.6  | 212.4  | 242.1  | 170.5  | 236    | 0.11384653  | 258      | 215.25   | 42.75   | 1.198606272 | 0.1216  | -1.202 |
| 104245_at   | 285.7  | 367.7  | 350.3  | 346.4  | 341.3  | 332.4  | 333.6  | 373.9  | 0.719463473 | 337.525  | 345.3    | 7.775   | 0.977483348 | 0.6886  | -1.026 |
| 104246_at   | 802.4  | 1008.8 | 593.2  | 744.5  | 421.1  | 475.4  | 556.3  | 635.3  | 0.045893215 | 787.225  | 522.025  | 265.2   | 1.508021646 | 0.02883 | -1.499 |



|             |        |        |        |        |        |        |        |        |             |          |          |         |             |            |        |
|-------------|--------|--------|--------|--------|--------|--------|--------|--------|-------------|----------|----------|---------|-------------|------------|--------|
| 104247_at   | 519.3  | 479.2  | 546.1  | 539.9  | 539.2  | 557.7  | 525.2  | 482.8  | 0.82403463  | 521.125  | 526.225  | 5.1     | 0.990308328 | 0.8289     | -1.01  |
| 104248_at   | 2686.4 | 1929.4 | 2287.4 | 2192.3 | 1513.9 | 2462   | 1450.3 | 1970.7 | 0.190508617 | 2273.875 | 1849.225 | 424.65  | 1.22963674  | 0.165      | -1.25  |
| 104249_g_at | 3506.6 | 2636.7 | 3164.2 | 2982.5 | 1890.4 | 3267.3 | 1819.9 | 2389   | 0.116789378 | 3072.5   | 2341.65  | 730.85  | 1.312108983 | 0.09225    | -1.343 |
| 104250_at   | 418.2  | 737.9  | 516.5  | 729.3  | 563.7  | 551.3  | 664.5  | 658.2  | 0.921378494 | 600.475  | 609.425  | 8.95    | 0.985314026 | 0.7995     | -1.04  |
| 104252_at   | 1232.4 | 1457.6 | 1201.2 | 1279.8 | 1362.4 | 1331.2 | 1357.2 | 1614.3 | 0.209465977 | 1292.75  | 1416.275 | 123.525 | 0.912781769 | 0.194      | -1.095 |
| 104253_at   | 159.2  | 235.3  | 199.4  | 188.7  | 274.9  | 142.9  | 191.2  | 156.8  | 0.90562097  | 195.65   | 191.45   | 4.2     | 1.021937843 | 0.7954     | -1.046 |
| 104254_at   | 332.9  | 314.2  | 285.4  | 362    | 333.5  | 309.1  | 424.1  | 323    | 0.472078931 | 323.625  | 347.425  | 23.8    | 0.931496006 | 0.4693     | -1.069 |
| 104255_at   | 59.1   | 75.5   | 74.5   | 94.6   | 158.2  | 135    | 133.1  | 152.9  | 0.000410347 | 75.925   | 144.8    | 68.875  | 0.524343923 | 0.000798   | 1.929  |
| 104256_at   | 137    | 92.6   | 108.7  | 108.9  | 47     | 61.4   | 43.8   | 61.4   | 0.003519282 | 111.8    | 53.4     | 58.4    | 2.093632959 | 0.000819   | -2.098 |
| 104257_g_at | 585    | 447    | 538.6  | 520.7  | 162.5  | 177.8  | 176.6  | 207.5  | 0.000570239 | 522.825  | 181.1    | 341.725 | 2.886940917 | 0.00000845 | -2.885 |
| 104258_at   | 598.1  | 452.9  | 488.4  | 460.8  | 626.6  | 519.6  | 511.5  | 564.3  | 0.244189213 | 500.05   | 555.5    | 55.45   | 0.900180018 | 0.2199     | 1.114  |
| 104259_at   | 1179.6 | 812.5  | 1100.2 | 1092.4 | 649.2  | 936.9  | 880.8  | 751    | 0.05958432  | 1046.175 | 804.475  | 241.7   | 1.300444389 | 0.06553    | -1.301 |
| 104260_at   | 261.4  | 244.9  | 213.1  | 234.4  | 233    | 231.5  | 298.2  | 326.6  | 0.260435795 | 238.45   | 272.325  | 33.875  | 0.875608189 | 0.2488     | 1.132  |
| 104261_at   | 164.1  | 243.9  | 244.7  | 252.1  | 209.6  | 261.1  | 212    | 309.1  | 0.515264237 | 226.2    | 247.95   | 21.75   | 0.912280702 | 0.5245     | 1.098  |
| 104262_at   | 59.8   | 60.7   | 75.9   | 71.8   | 73     | 57.5   | 30.3   | 77.3   | 0.545450772 | 67.05    | 59.525   | 7.525   | 1.126417472 | 0.4622     | -1.191 |
| 104263_at   | 612.8  | 497.2  | 650.8  | 581.6  | 362.6  | 535.6  | 549.3  | 580.5  | 0.237493785 | 585.6    | 507      | 78.6    | 1.155029586 | 0.2502     | -1.168 |
| 104264_at   | 916.8  | 1019.2 | 933.6  | 910.3  | 473.4  | 720.5  | 706.7  | 598.4  | 0.006408873 | 944.975  | 624.75   | 320.225 | 1.512565026 | 0.00548    | -1.532 |
| 104265_at   | 276.7  | 187.6  | 132    | 267.8  | 245.2  | 258.6  | 246.7  | 245.2  | 0.41057624  | 216.025  | 248.925  | 32.9    | 0.867831676 | 0.3312     | 1.202  |
| 104266_at   | 170    | 220.8  | 229.7  | 198.9  | 184.8  | 242.2  | 195.4  | 229.9  | 0.681360638 | 204.85   | 213.075  | 8.225   | 0.961398569 | 0.6836     | -1.041 |
| 104267_at   | 665.3  | 696    | 698.6  | 702.5  | 606.4  | 792.3  | 610.8  | 668.9  | 0.664578375 | 690.6    | 669.6    | 21      | 1.031362007 | 0.5849     | -1.037 |
| 104268_at   | 83.1   | 98.5   | 142.7  | 107.5  | 20.8   | 111.5  | 98.4   | 113.8  | 0.431193678 | 107.95   | 86.125   | 21.825  | 1.25341074  | 0.3923     | -1.482 |
| 104269_at   | 27.5   | 26.8   | 33.5   | 29.3   | 32.8   | 31.5   | 34.2   | 35.4   | 0.06193891  | 29.275   | 33.475   | 4.2     | 0.874533234 | 0.05023    | 1.146  |
| 104270_at   | 129.5  | 164    | 128.1  | 142.9  | 149    | 151    | 68.7   | 137.5  | 0.529285844 | 141.125  | 126.55   | 14.575  | 1.115171869 | 0.4734     | -1.163 |
| 104271_at   | 98.7   | 78.8   | 77.7   | 87.9   | 74.4   | 113    | 98     | 100.5  | 0.308004351 | 85.775   | 96.475   | 10.7    | 0.889090438 | 0.3307     | -1.117 |
| 104272_s_at | 494    | 566.9  | 588.1  | 540.5  | 533.3  | 578.5  | 681.4  | 578    | 0.276967498 | 547.375  | 592.8    | 45.425  | 0.923372132 | 0.2684     | -1.081 |
| 104273_at   | 96.3   | 95.7   | 96.1   | 70.7   | 126.1  | 105.5  | 88.1   | 102    | 0.172194045 | 89.7     | 105.425  | 15.725  | 0.850841831 | 0.1795     | 1.175  |
| 104274_at   | 1873.8 | 1590.2 | 2036   | 1657.5 | 1689.4 | 2054.5 | 1869.1 | 1266.6 | 0.738867513 | 1789.375 | 1719.9   | 69.475  | 1.04039479  | 0.686      | -1.052 |
| 104275_g_at | 806.4  | 798.8  | 693    | 761.9  | 688.6  | 771.1  | 700.7  | 700    | 0.174854963 | 765.025  | 715.1    | 49.925  | 1.06981541  | 0.1734     | -1.069 |
| 104276_at   | 918.2  | 908.7  | 1175.2 | 900.7  | 907.8  | 967.1  | 951.7  | 807.6  | 0.418722645 | 975.7    | 908.55   | 67.15   | 1.073908976 | 0.4105     | -1.07  |
| 104277_at   | 1410   | 1081.2 | 1133.3 | 1115   | 1044.4 | 1466.7 | 1095.7 | 1277.5 | 0.777688527 | 1184.875 | 1221.075 | 36.2    | 0.970353991 | 0.7945     | -1.027 |
| 104279_at   | 3870.2 | 3559.9 | 3612.7 | 3369.9 | 4678.4 | 3276.3 | 3813.3 | 3624.3 | 0.484289701 | 3603.175 | 3848.075 | 244.9   | 0.936357789 | 0.4941     | -1.06  |
| 104280_at   | 22.5   | 22.6   | 12.8   | 9      | 5.3    | 7.9    | 15.7   | 40.9   | 0.938431835 | 16.725   | 17.45    | 0.725   | 0.958452722 | 0.7094     | -1.217 |
| 104282_at   | 49.2   | 73.5   | 59.1   | 54.2   | 35.6   | 45.7   | 39.8   | 79.4   | 0.47001899  | 59       | 50.125   | 8.875   | 1.177057357 | 0.3434     | -1.225 |
| 104283_at   | 1535.9 | 1247.3 | 1262.1 | 1215.1 | 935.3  | 1218   | 998.3  | 881.1  | 0.026312064 | 1315.1   | 1008.175 | 306.925 | 1.304436234 | 0.02291    | -1.309 |
| 104284_at   | 264.4  | 408.4  | 410.8  | 411.9  | 379    | 445.8  | 508.8  | 482.5  | 0.135899289 | 373.875  | 454.025  | 80.15   | 0.823467871 | 0.1583     | 1.228  |
| 104285_at   | 508.5  | 290.2  | 408.7  | 392.7  | 380.3  | 347    | 368.1  | 376.6  | 0.528075262 | 400.025  | 368      | 32.025  | 1.087024457 | 0.6008     | -1.067 |
| 104286_at   | 609    | 568.7  | 654.8  | 456.4  | 588.6  | 689.5  | 480.1  | 687.2  | 0.571624948 | 572.225  | 611.35   | 39.125  | 0.93600229  | 0.5981     | -1.066 |
| 104287_at   | 1281.9 | 1685   | 1695.1 | 1457.9 | 1246.1 | 1364.9 | 1331.9 | 1553.7 | 0.243862759 | 1529.975 | 1374.15  | 155.825 | 1.113397373 | 0.2464     | -1.11  |
| 104288_at   | 1416.8 | 1358.5 | 1252.2 | 1484.4 | 1151.7 | 1511.2 | 1369.2 | 1763.5 | 0.633868875 | 1377.975 | 1448.9   | 70.925  | 0.951049072 | 0.691      | -1.041 |
| 104289_at   | 230.7  | 389.1  | 391    | 324.6  | 466.7  | 294.3  | 308.2  | 363.4  | 0.670421999 | 333.85   | 358.15   | 24.3    | 0.932151333 | 0.6596     | -1.078 |
| 104290_at   | 1046.1 | 730.4  | 1097.8 | 1235.8 | 727.3  | 631.4  | 720.8  | 1141   | 0.20478396  | 1027.525 | 805.125  | 222.4   | 1.276230399 | 0.1922     | -1.287 |
| 104291_at   | 21.9   | 14.6   | 1.6    | 10.6   | 5.1    | 11.3   | 10     | 1.7    | 0.335043205 | 12.175   | 7.025    | 5.15    | 1.733096085 | 0.5727     | -1.542 |
| 104292_at   | 61     | 60.8   | 56     | 81.7   | 68.9   | 72     | 112.9  | 96.1   | 0.120190131 | 64.875   | 87.475   | 22.6    | 0.741640469 | 0.09202    | 1.335  |
| 104293_at   | 398.8  | 527.7  | 514.5  | 461.5  | 409.1  | 461.1  | 486.3  | 490.4  | 0.705668567 | 475.625  | 461.725  | 13.9    | 1.030104499 | 0.7411     | -1.027 |
| 104294_at   | 383.8  | 321.8  | 371    | 339.2  | 284.3  | 276.2  | 320.2  | 332.4  | 0.042332804 | 353.95   | 303.275  | 50.675  | 1.167092573 | 0.0424     | -1.168 |
| 104296_at   | 422.4  | 607.9  | 536.6  | 535.4  | 517.8  | 490.8  | 573.6  | 692.8  | 0.492280714 | 525.575  | 568.75   | 43.175  | 0.924087912 | 0.4929     | -1.082 |
| 104297_at   | 899.2  | 650.9  | 763.2  | 663.4  | 521.6  | 681.9  | 779.5  | 561.3  | 0.236279035 | 744.175  | 636.075  | 108.1   | 1.169948512 | 0.2221     | -1.175 |
| 104298_at   | 317    | 282.8  | 272.6  | 282.5  | 219.9  | 258    | 302.5  | 235.3  | 0.154279748 | 288.725  | 253.925  | 34.8    | 1.137048341 | 0.1298     | -1.144 |
| 104299_at   | 109.9  | 211.9  | 179.4  | 193.3  | 149.6  | 145.1  | 137.7  | 25.9   | 0.166251382 | 173.625  | 114.575  | 59.05   | 1.515382937 | 0.2436     | -1.797 |
| 104300_at   | 939.2  | 836.6  | 799.6  | 761.9  | 858.5  | 822.4  | 963.5  | 780.4  | 0.702913114 | 834.325  | 856.2    | 21.875  | 0.974451063 | 0.6974     | -1.026 |
| 104301_at   | 1065   | 946.7  | 813.8  | 641    | 1198.3 | 751.4  | 1000   | 953.7  | 0.430401965 | 866.625  | 975.85   | 109.225 | 0.888071937 | 0.4326     | 1.13   |
| 104302_f_at | 347.8  | 375    | 357.3  | 385    | 771.7  | 401    | 543    | 357.9  | 0.201167606 | 366.275  | 518.4    | 152.125 | 0.706548997 | 0.1323     | 1.353  |
| 104303_i_at | 810.1  | 780.7  | 911.1  | 730.6  | 1084.5 | 614.3  | 576.8  | 486.6  | 0.452787195 | 808.125  | 690.55   | 117.575 | 1.170262834 | 0.3024     | -1.225 |
| 104304_r_at | 524.5  | 354.9  | 331.2  | 545.7  | 439.4  | 332.7  | 363.9  | 333    | 0.303336897 | 439.075  | 367.25   | 71.825  | 1.195575221 | 0.3114     | -1.174 |
| 104305_at   | 1356.3 | 1175.2 | 1252.3 | 1394.7 | 1314.8 | 1213.3 | 1187.2 | 1412.7 | 0.866079251 | 1294.625 | 1282     | 12.625  | 1.009847894 | 0.864      | -1.01  |
| 104306_at   | 417.4  | 636.4  | 523.4  | 634.7  | 566.5  | 715    | 629.9  | 660.4  | 0.200686258 | 552.975  | 642.95   | 89.975  | 0.860059103 | 0.1963     | 1.175  |



|             |        |        |        |        |        |        |        |        |             |          |          |          |             |           |        |
|-------------|--------|--------|--------|--------|--------|--------|--------|--------|-------------|----------|----------|----------|-------------|-----------|--------|
| 104308_at   | 108.4  | 55.3   | 158    | 114.3  | 98.2   | 89.1   | 125.4  | 126.9  | 0.970727369 | 109      | 109.9    | 0.9      | 0.991810737 | 0.8003    | -1.065 |
| 104310_at   | 669.1  | 609.2  | 831    | 661.9  | 784.1  | 716.1  | 772.7  | 927.3  | 0.154083481 | 692.8    | 800.05   | 107.25   | 0.865945878 | 0.1394    | 1.157  |
| 104311_at   | 832.7  | 798.2  | 668.8  | 1016.4 | 656    | 873.5  | 773.2  | 886.6  | 0.736199415 | 829.025  | 797.325  | 31.7     | 1.039757941 | 0.7626    | -1.036 |
| 104312_at   | 566.6  | 559.2  | 630.7  | 560.3  | 666.3  | 643.7  | 639.7  | 802    | 0.059105932 | 579.2    | 687.925  | 108.725  | 0.841952248 | 0.03197   | 1.184  |
| 104313_at   | 1884.9 | 1595.7 | 1855.3 | 1952.4 | 1779   | 2099.4 | 2085.4 | 2009   | 0.163320978 | 1822.075 | 1993.2   | 171.125  | 0.914145595 | 0.175     | -1.095 |
| 104314_r_at | 119.1  | 117    | 173.4  | 345.8  | 177    | 224.5  | 301.6  | 158.3  | 0.690188502 | 188.825  | 215.35   | 26.525   | 0.876828419 | 0.5075    | 1.227  |
| 104315_at   | 1384.6 | 1286.7 | 1365   | 1152.9 | 957.4  | 1391.3 | 1461   | 1367   | 0.981275046 | 1297.3   | 1294.175 | 3.125    | 1.002414666 | 0.9051    | -1.013 |
| 104316_at   | 293.8  | 322.5  | 303.3  | 308.7  | 111.7  | 273.3  | 271.6  | 303.3  | 0.219657916 | 307.075  | 239.975  | 67.1     | 1.27961246  | 0.2269    | -1.37  |
| 104317_at   | 1929   | 1267.2 | 1507.6 | 1555.6 | 536    | 1063.5 | 755.5  | 935.4  | 0.006349974 | 1564.85  | 822.6    | 742.25   | 1.902321906 | 0.008542  | -1.942 |
| 104318_at   | 230.3  | 258.6  | 240.3  | 346    | 333.5  | 309.6  | 333.8  | 372    | 0.074965894 | 268.8    | 337.225  | 68.425   | 0.797093928 | 0.05354   | 1.268  |
| 104320_at   | 527.3  | 574.7  | 651.1  | 596.6  | 785    | 628.4  | 883.7  | 688.1  | 0.0584925   | 587.425  | 746.3    | 158.875  | 0.787116441 | 0.03554   | 1.263  |
| 104322_at   | 1074   | 829.2  | 1010.5 | 875.4  | 928.4  | 842.8  | 665.4  | 882.3  | 0.197177294 | 947.275  | 829.725  | 117.55   | 1.141673446 | 0.2065    | -1.144 |
| 104323_at   | 33.8   | 24.5   | 8.1    | 8.6    | 55.6   | 23     | 12.9   | 41.2   | 0.259149584 | 18.75    | 33.175   | 14.425   | 0.565184627 | 0.2509    | 1.856  |
| 104324_at   | 383.1  | 443.8  | 500.4  | 388.7  | 415.6  | 645.6  | 530.6  | 538.7  | 0.117256277 | 429      | 532.625  | 103.625  | 0.805444731 | 0.1047    | 1.234  |
| 104325_at   | 102.6  | 83.4   | 116.7  | 74.1   | 174.4  | 141.7  | 154.2  | 83     | 0.107800599 | 94.2     | 138.325  | 44.125   | 0.68100488  | 0.1085    | 1.438  |
| 104326_at   | 158.5  | 229.3  | 217.1  | 192.8  | 240.8  | 266.1  | 252.7  | 168.2  | 0.276143503 | 199.425  | 231.95   | 32.525   | 0.859775814 | 0.3135    | 1.157  |
| 104327_at   | 941.8  | 786.3  | 1027.8 | 1017.5 | 573.5  | 913.4  | 752    | 853.9  | 0.12095055  | 943.35   | 773.2    | 170.15   | 1.220059493 | 0.1331    | -1.232 |
| 104328_at   | 30.7   | 8.5    | 49.5   | 7.3    | 9.3    | 52.8   | 20.8   | 11.4   | 0.977133607 | 24       | 23.575   | 0.425    | 1.018027572 | 0.9346    | -1.054 |
| 104329_at   | 22.1   | 26.1   | 23.9   | 5.4    | 21.1   | 15.4   | 6.3    | 30     | 0.869738584 | 19.375   | 18.2     | 1.175    | 1.06456044  | 0.9262    | -1.05  |
| 104330_g_at | 242.7  | 399.5  | 230.5  | 248.3  | 242.5  | 241.1  | 255.6  | 179.4  | 0.307704236 | 280.25   | 229.65   | 50.6     | 1.220335293 | 0.2741    | -1.199 |
| 104331_at   | 1051.4 | 1847.7 | 1269.3 | 1261.7 | 1034.9 | 1336.1 | 1188.6 | 1329.9 | 0.505965407 | 1357.525 | 1222.375 | 135.15   | 1.110563452 | 0.531     | -1.092 |
| 104332_at   | 1023.8 | 915.8  | 981.9  | 814.7  | 1049.8 | 895.1  | 1031.7 | 1058.3 | 0.257566658 | 934.05   | 1008.725 | 74.675   | 0.925970904 | 0.2646    | -1.081 |
| 104333_at   | 601.4  | 674.7  | 668.8  | 600.6  | 492.2  | 669.4  | 566.1  | 629.1  | 0.334855931 | 636.375  | 589.2    | 47.175   | 1.080066191 | 0.3131    | -1.086 |
| 104334_at   | 533.6  | 502.7  | 534.3  | 493.3  | 502.2  | 499.9  | 562.7  | 494.1  | 0.950622847 | 515.975  | 514.725  | 1.25     | 1.002428481 | 0.9325    | -1.003 |
| 104335_at   | 73     | 23.1   | 103.6  | 101.9  | 96.5   | 77.4   | 138.3  | 57.7   | 0.52790555  | 75.4     | 92.475   | 17.075   | 0.815355501 | 0.4786    | 1.351  |
| 104336_at   | 36.2   | 84.3   | 78.1   | 23.6   | 56     | 35.3   | 129.1  | 78.4   | 0.477867423 | 55.55    | 74.7     | 19.15    | 0.743641232 | 0.4701    | 1.373  |
| 104337_f_at | 492.5  | 520    | 452.7  | 531.6  | 844.5  | 768.5  | 859.4  | 854.2  | 2.55282E-05 | 499.2    | 831.65   | 332.45   | 0.60025251  | 0.0000255 | 1.667  |
| 104338_r_at | 161.8  | 195.4  | 193.7  | 226.4  | 243.4  | 344.8  | 283.7  | 257.4  | 0.020586125 | 194.325  | 282.325  | 88       | 0.688302488 | 0.0112    | 1.45   |
| 104339_at   | 358.9  | 569.2  | 479.5  | 450.2  | 448.2  | 504.3  | 533.1  | 436.8  | 0.756395099 | 464.45   | 480.6    | 16.15    | 0.966396171 | 0.6923    | -1.045 |
| 104340_at   | 287    | 318.8  | 290.5  | 285.2  | 206.9  | 305.7  | 282.2  | 275    | 0.287969221 | 295.375  | 267.45   | 27.925   | 1.10441204  | 0.268     | -1.115 |
| 104341_at   | 687.5  | 1022.6 | 813.1  | 841.9  | 947.6  | 759.3  | 873.5  | 747    | 0.914877809 | 841.275  | 831.85   | 9.425    | 1.011330168 | 0.9524    | -1.006 |
| 104342_i_at | 151.1  | 162.8  | 139.5  | 181.8  | 189.8  | 258.7  | 218.9  | 165.1  | 0.086414124 | 158.8    | 208.125  | 49.325   | 0.763003003 | 0.05748   | 1.299  |
| 104343_f_at | 3021.5 | 4368.3 | 3529.9 | 3012.6 | 5494.2 | 4687.7 | 4891.6 | 4421.9 | 0.014296868 | 3483.075 | 4873.85  | 1390.775 | 0.714645506 | 0.01309   | 1.411  |
| 104344_at   | 68.1   | 49.6   | 33     | 52.2   | 105.8  | 113    | 110.3  | 67.3   | 0.012134472 | 50.725   | 99.1     | 48.375   | 0.51185671  | 0.01254   | 1.976  |
| 104345_at   | 486.3  | 483.1  | 522    | 404.5  | 768    | 463.1  | 573.7  | 452    | 0.313486888 | 473.975  | 564.2    | 90.225   | 0.840083304 | 0.2925    | 1.168  |
| 104346_at   | 161.5  | 188.1  | 192.9  | 225.4  | 196    | 161.7  | 186.2  | 251.9  | 0.774503526 | 191.975  | 198.95   | 6.975    | 0.96494094  | 0.8056    | -1.03  |
| 104348_at   | 1208.9 | 789.7  | 1066.5 | 757.1  | 721.8  | 1118.2 | 1013.7 | 908.8  | 0.917729178 | 955.55   | 940.625  | 14.925   | 1.01586711  | 0.9531    | -1.009 |
| 104349_at   | 636.4  | 677.9  | 607    | 770.1  | 494.2  | 627.9  | 576.8  | 666.2  | 0.163880114 | 672.85   | 591.275  | 81.575   | 1.137964568 | 0.1639    | -1.14  |
| 104350_at   | 708.1  | 1058.6 | 1066.1 | 1035   | 722.4  | 1103.1 | 1131.2 | 1144.6 | 0.677052115 | 966.95   | 1025.325 | 58.375   | 0.943066832 | 0.724     | -1.057 |
| 104351_at   | 203.8  | 221    | 162    | 269.7  | 277.3  | 224    | 283.9  | 227.7  | 0.208026788 | 214.125  | 253.225  | 39.1     | 0.845591865 | 0.1966    | 1.195  |
| 104352_at   | 728.8  | 1217   | 921.7  | 947.4  | 800.1  | 944.4  | 740.8  | 958.8  | 0.45580904  | 953.725  | 861.025  | 92.7     | 1.107662379 | 0.4821    | -1.096 |
| 104353_at   | 34.9   | 67.1   | 41.8   | 69.7   | 78.6   | 48.9   | 25     | 56     | 0.932474032 | 53.375   | 52.125   | 1.25     | 1.023980815 | 0.8486    | -1.061 |
| 104354_at   | 351.9  | 319    | 312.5  | 354.2  | 297.9  | 381.1  | 324.9  | 324.3  | 0.91365907  | 334.4    | 332.05   | 2.35     | 1.007077247 | 0.8813    | -1.01  |
| 104355_at   | 2.5    | 0.9    | 3.7    | 1      | 4      | 2.4    | 1.6    | 2.1    | 0.577057711 | 2.025    | 2.525    | 0.5      | 0.801980198 | 0.418     | 1.408  |
| 104356_at   | 334.1  | 209.3  | 236.4  | 288.3  | 344.1  | 197.1  | 192.1  | 197.7  | 0.489628969 | 267.025  | 232.75   | 34.275   | 1.14726101  | 0.4143    | -1.166 |
| 104358_at   | 717.7  | 952.7  | 954.6  | 733    | 1160.4 | 1090.3 | 1110.7 | 1160.9 | 0.017996107 | 839.5    | 1130.575 | 291.075  | 0.742542512 | 0.008972  | 1.359  |
| 104360_at   | 3391.9 | 3342.8 | 2814.7 | 3121.5 | 2913.4 | 3342.2 | 3658.6 | 3317.1 | 0.513573659 | 3167.725 | 3307.825 | 140.1    | 0.957645885 | 0.5254    | -1.044 |
| 104361_at   | 729.2  | 709    | 661    | 544.4  | 1039.3 | 585.1  | 709.8  | 671.3  | 0.448128208 | 660.9    | 751.375  | 90.475   | 0.879587423 | 0.4574    | 1.117  |
| 104362_at   | 378.6  | 556.9  | 475.1  | 599.4  | 564.5  | 539.7  | 528.2  | 728.9  | 0.241279777 | 502.5    | 590.325  | 87.825   | 0.85122602  | 0.2326    | 1.182  |
| 104363_at   | 158.9  | 246.7  | 183.7  | 247.8  | 254.1  | 191.9  | 230.7  | 236.7  | 0.497994721 | 209.275  | 228.35   | 19.075   | 0.916465951 | 0.4572    | -1.105 |
| 104364_at   | 509.8  | 427.7  | 527.9  | 354.6  | 553.2  | 400.9  | 407.8  | 411.5  | 0.837067228 | 455      | 443.35   | 11.65    | 1.026277208 | 0.8538    | -1.023 |
| 104365_at   | 841.2  | 855.3  | 935.7  | 1011.3 | 653.5  | 996.6  | 912.1  | 1011.2 | 0.857259343 | 910.875  | 893.35   | 17.525   | 1.019617171 | 0.7866    | -1.032 |
| 104366_at   | 620.2  | 958.9  | 820.2  | 872.2  | 669.2  | 849.3  | 764.4  | 1100.2 | 0.820033099 | 817.875  | 845.775  | 27.9     | 0.967012503 | 0.8431    | -1.03  |
| 104367_at   | 1982   | 1968.3 | 1725.8 | 1891.6 | 1245.4 | 1751   | 1419.1 | 1461   | 0.018724153 | 1891.925 | 1469.125 | 422.8    | 1.287790351 | 0.01526   | -1.296 |
| 104368_at   | 86.6   | 125.5  | 115.6  | 133.2  | 47.8   | 94.1   | 155.6  | 140    | 0.83527241  | 115.225  | 109.375  | 5.85     | 1.053485714 | 0.6547    | -1.143 |
| 104369_at   | 156    | 170.2  | 198    | 188.4  | 191.1  | 180.1  | 142.7  | 220.6  | 0.781032185 | 178.15   | 183.625  | 5.475    | 0.970183799 | 0.8381    | -1.023 |



|             |        |        |        |        |        |        |        |        |             |          |          |         |             |          |        |
|-------------|--------|--------|--------|--------|--------|--------|--------|--------|-------------|----------|----------|---------|-------------|----------|--------|
| 104370_s_at | 60.8   | 108.7  | 109.2  | 58.6   | 37.4   | 147.2  | 31.6   | 43.2   | 0.560476845 | 84.325   | 64.85    | 19.475  | 1.300308404 | 0.3119   | -1.54  |
| 104371_at   | 376.4  | 349    | 295.8  | 357.9  | 241.2  | 358.7  | 229.2  | 356.7  | 0.282657079 | 344.775  | 296.45   | 48.325  | 1.163012312 | 0.249    | -1.184 |
| 104372_at   | 180.7  | 406.7  | 269    | 320.6  | 407    | 281.6  | 389.9  | 233    | 0.614749166 | 294.25   | 327.875  | 33.625  | 0.897445673 | 0.5879   | 1.132  |
| 104373_at   | 425.4  | 386.3  | 385.3  | 407.6  | 182.1  | 334.9  | 250.1  | 339.4  | 0.041316715 | 401.15   | 276.625  | 124.525 | 1.450158156 | 0.03583  | -1.494 |
| 104374_at   | 159.4  | 120.4  | 51.7   | 155.7  | 344.6  | 95.7   | 45.3   | 168.9  | 0.583718587 | 121.8    | 163.625  | 41.825  | 0.744385027 | 0.8162   | 1.13   |
| 104375_at   | 2066   | 2518.2 | 2355.6 | 2432.6 | 940.9  | 1500.7 | 1682.8 | 1296.7 | 0.003239014 | 2343.1   | 1355.275 | 987.825 | 1.728874214 | 0.005315 | -1.764 |
| 104376_at   | 444.7  | 730.7  | 629.4  | 576.8  | 748.2  | 639.3  | 743.9  | 786    | 0.108890212 | 595.4    | 729.35   | 133.95  | 0.816343319 | 0.1056   | 1.241  |
| 104378_at   | 210.5  | 173.4  | 184.8  | 244.8  | 180.3  | 233.7  | 250.7  | 333.9  | 0.257108966 | 203.375  | 249.65   | 46.275  | 0.814640497 | 0.2469   | 1.209  |
| 104380_at   | 609.5  | 536.2  | 585    | 713    | 468.8  | 627.2  | 574.4  | 608.9  | 0.4546285   | 610.925  | 569.825  | 41.1    | 1.072127408 | 0.4571   | -1.073 |
| 104381_at   | 50.8   | 13.3   | 73.1   | 12.5   | 16.5   | 43.5   | 88.1   | 67.9   | 0.469300446 | 37.425   | 54       | 16.575  | 0.693055556 | 0.44     | 1.622  |
| 104382_at   | 13.1   | 3.5    | 3.8    | 4.6    | 19.1   | 6.9    | 3.4    | 13.5   | 0.331285971 | 6.25     | 10.725   | 4.475   | 0.582750583 | 0.3381   | 1.664  |
| 104383_at   | 41.6   | 103.4  | 63     | 53.4   | 19.9   | 69.7   | 102.4  | 90.3   | 0.825517644 | 65.35    | 70.575   | 5.225   | 0.925965285 | 0.9445   | -1.031 |
| 104385_i_at | 268.5  | 263.8  | 356    | 236    | 351.7  | 330    | 296.8  | 143    | 0.99016505  | 281.075  | 280.375  | 0.7     | 1.002496656 | 0.8409   | -1.049 |
| 104386_f_at | 2911.7 | 3151.6 | 2788.7 | 3027.7 | 2643.7 | 2929.6 | 2725.7 | 3337.3 | 0.74160292  | 2969.925 | 2909.075 | 60.85   | 1.020917302 | 0.6964   | -1.024 |
| 104387_at   | 2      | 2.5    | 5      | 2.1    | 3.4    | 1.8    | 2.9    | 4.2    | 0.847638759 | 2.9      | 3.075    | 0.175   | 0.943089431 | 0.7579   | -1.093 |
| 104388_at   | 15.8   | 74.7   | 19.2   | 29.9   | 50.1   | 33     | 49.7   | 21.6   | 0.819229136 | 34.9     | 38.6     | 3.7     | 0.904145078 | 0.5695   | 1.272  |
| 104389_at   | 1556.9 | 2819.7 | 1588.7 | 2398.4 | 1409.8 | 1303.7 | 1409.9 | 1747.1 | 0.136906829 | 2090.925 | 1467.625 | 623.3   | 1.42469977  | 0.08981  | -1.386 |
| 104390_at   | 1938.6 | 1903.7 | 1965.2 | 1835   | 2012.7 | 1886   | 2258.8 | 1898.7 | 0.324634324 | 1910.625 | 2014.05  | 103.425 | 0.948648246 | 0.299    | -1.052 |
| 104391_s_at | 400.2  | 472.4  | 517.2  | 457.8  | 486    | 403.6  | 488.7  | 461.1  | 0.949812199 | 461.9    | 459.85   | 2.05    | 1.004457975 | 0.9654   | -1.003 |
| 104392_at   | 134.5  | 173.2  | 179.2  | 171.1  | 160.8  | 145.1  | 106    | 191.6  | 0.536966957 | 164.5    | 150.875  | 13.625  | 1.090306545 | 0.4933   | -1.108 |
| 104393_at   | 148.3  | 170.4  | 162    | 193.1  | 201.1  | 238.3  | 192.6  | 304.6  | 0.076273261 | 168.45   | 234.15   | 65.7    | 0.719410634 | 0.0357   | 1.373  |
| 104394_at   | 505.3  | 551.7  | 422.8  | 523.6  | 576.4  | 625.9  | 547.5  | 512    | 0.129875968 | 500.85   | 565.45   | 64.6    | 0.885754709 | 0.1355   | 1.131  |
| 104395_at   | 1239.2 | 1646.2 | 1745.3 | 1775.6 | 1385.5 | 1513.5 | 1791.9 | 1749.7 | 0.958371799 | 1601.575 | 1610.15  | 8.575   | 0.994674409 | 0.9279   | -1.01  |
| 104396_at   | 162    | 241.2  | 196.5  | 212.3  | 119.9  | 159.2  | 205.9  | 166.5  | 0.147767642 | 203      | 162.875  | 40.125  | 1.246354566 | 0.1514   | -1.256 |
| 104398_at   | 54.7   | 102.6  | 101    | 99.8   | 154.5  | 154.1  | 121.8  | 157    | 0.008637663 | 89.525   | 146.85   | 57.325  | 0.609635683 | 0.01977  | 1.684  |
| 104399_at   | 1676.9 | 1210.4 | 1335.8 | 1403   | 1085.4 | 1107.5 | 1039.6 | 1187.4 | 0.04949253  | 1406.525 | 1104.975 | 301.55  | 1.272902102 | 0.01873  | -1.265 |
| 104400_at   | 233.4  | 217    | 235.8  | 280.9  | 171.7  | 300.9  | 168.7  | 141.5  | 0.2969741   | 241.775  | 195.7    | 46.075  | 1.235436893 | 0.1974   | -1.284 |
| 104401_at   | 43.3   | 8.5    | 50.5   | 38     | 21.9   | 24.6   | 46.7   | 43.4   | 0.93718189  | 35.075   | 34.15    | 0.925   | 1.027086384 | 0.8202   | 1.114  |
| 104402_at   | 247.4  | 219.5  | 177.1  | 233.6  | 197.7  | 208.7  | 210.4  | 243.9  | 0.825219741 | 219.4    | 215.175  | 4.225   | 1.019635181 | 0.8683   | -1.015 |
| 104403_at   | 700    | 726.6  | 636.9  | 904.7  | 610.4  | 709.3  | 656.5  | 933.8  | 0.879527746 | 742.05   | 727.5    | 14.55   | 1.02        | 0.8419   | -1.025 |
| 104404_at   | 174.8  | 227.9  | 223.6  | 319.2  | 183.5  | 207.5  | 156.5  | 198.6  | 0.199152018 | 236.375  | 186.525  | 49.85   | 1.2672564   | 0.1642   | -1.245 |
| 104405_at   | 220.2  | 168.2  | 174.7  | 169.6  | 167.5  | 233.5  | 207.4  | 193.3  | 0.388629602 | 183.175  | 200.425  | 17.25   | 0.913932893 | 0.3813   | -1.093 |
| 104406_at   | 655.2  | 634.5  | 683    | 639.7  | 537.1  | 520.7  | 440.2  | 507.1  | 0.002131445 | 653.1    | 501.275  | 151.825 | 1.302877662 | 0.001278 | -1.306 |
| 104407_at   | 341.8  | 370.9  | 312.5  | 362    | 328.8  | 432.4  | 263.1  | 606.3  | 0.478508276 | 346.8    | 407.65   | 60.85   | 0.850729793 | 0.5571   | 1.121  |
| 104408_s_at | 915.1  | 1336.5 | 970.1  | 1272.4 | 671.1  | 909.8  | 751.1  | 844.8  | 0.044555144 | 1123.525 | 794.2    | 329.325 | 1.414662554 | 0.02646  | -1.405 |
| 104409_at   | 81.7   | 175.4  | 147.4  | 149.8  | 238.6  | 140.6  | 215.8  | 189.9  | 0.094312095 | 138.575  | 196.225  | 57.65   | 0.706204612 | 0.1212   | 1.444  |
| 104410_at   | 675.1  | 1195.2 | 762.9  | 1024.9 | 1469.9 | 779.5  | 1182.1 | 1032.5 | 0.324841423 | 914.525  | 1116     | 201.475 | 0.819466846 | 0.3275   | 1.22   |
| 104411_at   | 14.1   | 19.6   | 12     | 6.6    | 12.1   | 44.7   | 11.6   | 20.2   | 0.336159972 | 13.075   | 22.15    | 9.075   | 0.590293454 | 0.3032   | 1.549  |
| 104412_at   | 518.5  | 621.2  | 578.2  | 649.2  | 448.8  | 768.1  | 621.5  | 641    | 0.71430507  | 591.775  | 619.85   | 28.075  | 0.954706784 | 0.8032   | -1.032 |
| 104413_at   | 194.9  | 194.3  | 164.2  | 202.5  | 178.6  | 216.3  | 213.5  | 229.8  | 0.189886868 | 188.975  | 209.55   | 20.575  | 0.90181341  | 0.2032   | 1.108  |
| 104414_at   | 42.2   | 14.7   | 32.1   | 148.5  | 101.2  | 64.4   | 22.6   | 73.6   | 0.867137925 | 59.375   | 65.45    | 6.075   | 0.907181054 | 0.5962   | 1.383  |
| 104415_at   | 94.8   | 156.5  | 135.9  | 128    | 102.6  | 153.6  | 105    | 126.4  | 0.706430194 | 128.8    | 121.9    | 6.9     | 1.056603774 | 0.7244   | -1.054 |
| 104416_at   | 26.3   | 34.3   | 19.1   | 53.7   | 57.6   | 57.9   | 48.4   | 31.4   | 0.163648243 | 33.35    | 48.825   | 15.475  | 0.683051715 | 0.1557   | 1.53   |
| 104417_at   | 138.2  | 148.1  | 118.2  | 130.6  | 82.7   | 158.4  | 152    | 219.8  | 0.542947387 | 133.775  | 153.225  | 19.45   | 0.87306249  | 0.7099   | -1.085 |
| 104418_at   | 73.2   | 75.7   | 105.7  | 91.5   | 52.9   | 69.7   | 70.3   | 81.8   | 0.115837037 | 86.525   | 68.675   | 17.85   | 1.259919913 | 0.1134   | -1.261 |
| 104419_at   | 410.2  | 372.2  | 342.7  | 498.3  | 344    | 480.5  | 488.9  | 513.4  | 0.357740873 | 405.85   | 456.7    | 50.85   | 0.888657762 | 0.3783   | 1.123  |
| 104420_at   | 31.9   | 26.7   | 43.2   | 38.4   | 44.4   | 18.6   | 35.1   | 36     | 0.823378999 | 35.05    | 33.525   | 1.525   | 1.045488441 | 0.7393   | -1.078 |
| 104421_at   | 21.5   | 38.4   | 48.2   | 52.9   | 53.9   | 52.4   | 52.7   | 32.6   | 0.411846257 | 40.25    | 47.9     | 7.65    | 0.840292276 | 0.4086   | 1.233  |
| 104422_at   | 247.1  | 192.6  | 405.1  | 412.1  | 322.5  | 258.8  | 445.2  | 356.2  | 0.661178425 | 314.225  | 345.675  | 31.45   | 0.909018587 | 0.5818   | 1.136  |
| 104423_at   | 792.9  | 663.1  | 794    | 764.6  | 520.4  | 673.2  | 627.9  | 619.8  | 0.018412576 | 753.65   | 610.325  | 143.325 | 1.2348339   | 0.02214  | -1.237 |
| 104424_at   | 21.2   | 39.9   | 19.4   | 49.3   | 90.8   | 16.1   | 77.9   | 58.4   | 0.185303271 | 32.45    | 60.8     | 28.35   | 0.533717105 | 0.2929   | 1.693  |
| 104425_at   | 3.2    | 23.4   | 24.4   | 21     | 4.8    | 26.3   | 20.4   | 23.7   | 0.911918742 | 18       | 18.8     | 0.8     | 0.957446809 | 0.86     | 1.124  |
| 104427_at   | 1231.1 | 1163.4 | 1026.8 | 1117.4 | 856.2  | 1060.3 | 999.9  | 1216.1 | 0.292799712 | 1134.675 | 1033.125 | 101.55  | 1.098294011 | 0.2713   | -1.105 |
| 104428_s_at | 200.2  | 172.6  | 159.7  | 183.5  | 120.3  | 184.9  | 140.7  | 191.5  | 0.359917981 | 179      | 159.35   | 19.65   | 1.123313461 | 0.3217   | -1.14  |
| 104429_at   | 30.2   | 20.4   | 6.9    | 29.2   | 48.8   | 35.2   | 69.5   | 10.4   | 0.224883371 | 21.675   | 40.975   | 19.3    | 0.528981086 | 0.326    | 1.78   |
| 104430_at   | 11.9   | 5.3    | 6.6    | 6.4    | 6      | 15.4   | 4.9    | 12.9   | 0.48388123  | 7.55     | 9.8      | 2.25    | 0.770408163 | 0.572    | 1.218  |



|             |        |        |        |        |        |        |        |        |             |          |          |         |             |          |        |
|-------------|--------|--------|--------|--------|--------|--------|--------|--------|-------------|----------|----------|---------|-------------|----------|--------|
| 104431_at   | 81.3   | 101.4  | 117.1  | 105.3  | 76.9   | 112.7  | 82.5   | 107.5  | 0.603527452 | 101.275  | 94.9     | 6.375   | 1.067175975 | 0.5877   | -1.072 |
| 104432_at   | 828.7  | 1128.5 | 1146.6 | 1122.7 | 510.4  | 472    | 527.5  | 587.3  | 0.003828883 | 1056.625 | 524.3    | 532.325 | 2.015306122 | 0.000253 | -2.004 |
| 104433_at   | 299.9  | 387.1  | 380.5  | 365.2  | 337.2  | 356.5  | 354.5  | 362    | 0.80105359  | 358.175  | 352.55   | 5.625   | 1.015955184 | 0.8603   | -1.011 |
| 104434_at   | 555.6  | 797.9  | 657.8  | 793    | 489.7  | 659.9  | 656    | 919.9  | 0.860012743 | 701.075  | 681.375  | 19.7    | 1.028912126 | 0.7928   | -1.044 |
| 104435_at   | 1514.5 | 1279.8 | 1405.9 | 1336.6 | 1365   | 1506.8 | 1483   | 1709.6 | 0.188248807 | 1384.2   | 1516.1   | 131.9   | 0.913000462 | 0.1787   | -1.094 |
| 104436_at   | 10.4   | 34.5   | 20.2   | 10.5   | 49.9   | 7.3    | 41.6   | 27.4   | 0.299392605 | 18.9     | 31.55    | 12.65   | 0.599049128 | 0.4472   | 1.529  |
| 104437_at   | 257.2  | 275.4  | 254    | 280.5  | 285.3  | 252.4  | 278.9  | 283.8  | 0.442585975 | 266.775  | 275.1    | 8.325   | 0.969738277 | 0.4532   | -1.031 |
| 104438_at   | 67.7   | 59.9   | 100.7  | 55.5   | 38.9   | 60.2   | 54.6   | 79.5   | 0.377186696 | 70.95    | 58.3     | 12.65   | 1.216981132 | 0.351    | -1.222 |
| 104439_at   | 231.3  | 254.5  | 228.3  | 302.1  | 245.7  | 285.4  | 296.9  | 343.3  | 0.192779458 | 254.05   | 292.825  | 38.775  | 0.867583027 | 0.1846   | 1.152  |
| 104440_at   | 10.9   | 18.9   | 10.2   | 18     | 15.6   | 19.1   | 12.4   | 19     | 0.499026146 | 14.5     | 16.525   | 2.025   | 0.877458396 | 0.4466   | 1.169  |
| 104441_at   | 98.3   | 124.3  | 138.2  | 105.3  | 95.9   | 81.5   | 114    | 131.7  | 0.478184412 | 116.525  | 105.775  | 10.75   | 1.10163082  | 0.4546   | -1.109 |
| 104442_at   | 119.1  | 119.2  | 118    | 260.6  | 130.7  | 175.2  | 103.9  | 235.6  | 0.881360733 | 154.225  | 161.35   | 7.125   | 0.955841339 | 0.8215   | -1.064 |
| 104443_at   | 29.1   | 38     | 47.2   | 25.3   | 43.3   | 25.5   | 23.9   | 32.4   | 0.60204499  | 34.9     | 31.275   | 3.625   | 1.115907274 | 0.5936   | -1.115 |
| 104444_at   | 129.8  | 212.4  | 162.6  | 149.9  | 260.7  | 200.7  | 245.2  | 169.8  | 0.089224794 | 163.675  | 219.1    | 55.425  | 0.747033318 | 0.0845   | 1.342  |
| 104445_at   | 2804.6 | 3047.5 | 2599.3 | 2734.4 | 2660.4 | 3298.9 | 2647.3 | 3303   | 0.431226445 | 2796.45  | 2977.4   | 180.95  | 0.939225499 | 0.4436   | -1.06  |
| 104446_f_at | 202.8  | 200.3  | 236.6  | 244.2  | 297    | 186.5  | 197.2  | 231.4  | 0.808837781 | 220.975  | 228.025  | 7.05    | 0.969082337 | 0.8791   | -1.019 |
| 104447_r_at | 177.7  | 194.6  | 181.6  | 219.1  | 120.5  | 221    | 222.5  | 232.6  | 0.843809449 | 193.25   | 199.15   | 5.9     | 0.97037409  | 0.9974   | -1.001 |
| 104448_at   | 14.3   | 8.4    | 21.5   | 31.3   | 2.2    | 8.7    | 4      | 7.1    | 0.068200807 | 18.875   | 5.5      | 13.375  | 3.431818182 | 0.024    | -3.495 |
| 104449_at   | 232.7  | 217    | 148.4  | 197.2  | 189.3  | 246.2  | 196    | 222.6  | 0.539978419 | 198.825  | 213.525  | 14.7    | 0.931155602 | 0.5169   | -1.083 |
| 104450_at   | 86     | 61     | 51.6   | 110.9  | 156.7  | 64.8   | 75     | 23.2   | 0.938034964 | 77.375   | 79.925   | 2.55    | 0.968095089 | 0.7686   | -1.141 |
| 104451_at   | 429.6  | 514    | 480.9  | 491.2  | 359.8  | 457.3  | 509.4  | 575.5  | 0.947595945 | 478.925  | 475.5    | 3.425   | 1.007202944 | 0.861    | -1.02  |
| 104452_at   | 364.7  | 404.2  | 335.2  | 305.7  | 239.3  | 216    | 205.3  | 291.5  | 0.00709085  | 352.45   | 238.025  | 114.425 | 1.480726814 | 0.006688 | -1.486 |
| 104453_at   | 266.7  | 504.4  | 471    | 428.6  | 683    | 511.5  | 562.8  | 469.3  | 0.095444565 | 417.675  | 556.65   | 138.975 | 0.750336836 | 0.1131   | 1.358  |
| 104454_at   | 223.2  | 269.5  | 233.1  | 166.5  | 150.7  | 201.5  | 203.9  | 247.5  | 0.474987794 | 223.075  | 200.9    | 22.175  | 1.110378298 | 0.4907   | -1.111 |
| 104455_at   | 29.1   | 40     | 31     | 34.6   | 54.1   | 16.2   | 5      | 31.7   | 0.566525183 | 33.675   | 26.75    | 6.925   | 1.258878505 | 0.3294   | -1.735 |
| 104456_at   | 158.5  | 147.6  | 160.9  | 144.7  | 125.1  | 187.1  | 127.6  | 141.9  | 0.645449597 | 152.925  | 145.425  | 7.5     | 1.051572976 | 0.5387   | -1.065 |
| 104457_at   | 5.6    | 6.1    | 20.5   | 9.8    | 39.2   | 23.3   | 32.7   | 32.5   | 0.00414057  | 10.5     | 31.925   | 21.425  | 0.32889585  | 0.007969 | 3.456  |
| 104458_at   | 263.2  | 390.2  | 375.3  | 285    | 289.7  | 421.5  | 500    | 314.5  | 0.403348904 | 328.425  | 381.425  | 53      | 0.861047388 | 0.4182   | 1.15   |
| 104460_at   | 10.1   | 37.9   | 14.7   | 9.8    | 32.3   | 44.2   | 16.1   | 26.9   | 0.234763464 | 18.125   | 29.875   | 11.75   | 0.606694561 | 0.1622   | 1.831  |
| 104461_at   | 486    | 323.7  | 224.8  | 473.6  | 248.3  | 542.6  | 428.7  | 250.9  | 0.924850576 | 377.025  | 367.625  | 9.4     | 1.025569534 | 0.897    | -1.037 |
| 104462_at   | 167.3  | 484.4  | 428.9  | 336.1  | 533    | 332.6  | 430.8  | 354.1  | 0.511218324 | 354.175  | 412.625  | 58.45   | 0.858345956 | 0.4513   | 1.233  |
| 104463_at   | 587.3  | 719.5  | 779.6  | 810.2  | 955.2  | 716.5  | 663.2  | 847.7  | 0.420654354 | 724.15   | 795.65   | 71.5    | 0.910136366 | 0.4345   | -1.096 |
| 104464_s_at | 1533.1 | 1593.3 | 1553.5 | 1534.5 | 2052.7 | 1736.4 | 1601.4 | 1876.1 | 0.070908868 | 1553.6   | 1816.65  | 263.05  | 0.855200506 | 0.02999  | 1.165  |
| 104466_at   | 508.4  | 484.7  | 616.7  | 576.8  | 603.8  | 466.6  | 471    | 447.4  | 0.33492008  | 546.65   | 497.2    | 49.45   | 1.099456959 | 0.31     | -1.102 |
| 104467_at   | 659.5  | 636.8  | 663.4  | 715.4  | 567    | 629.7  | 624.5  | 654.2  | 0.091602269 | 668.775  | 618.85   | 49.925  | 1.08067383  | 0.09289  | -1.081 |
| 104468_at   | 250.6  | 240.7  | 235.4  | 216.1  | 245.3  | 226.1  | 176.8  | 189.1  | 0.202969982 | 235.7    | 209.325  | 26.375  | 1.126000239 | 0.1767   | -1.134 |
| 104469_at   | 1306.6 | 1207.7 | 1102.8 | 1114   | 1642.5 | 1527.2 | 1327   | 1205.2 | 0.084923275 | 1182.775 | 1425.475 | 242.7   | 0.829740964 | 0.06334  | 1.199  |
| 104470_at   | 371.8  | 316    | 332.3  | 338.1  | 192.5  | 371    | 259.5  | 315.9  | 0.250629543 | 339.55   | 284.725  | 54.825  | 1.192554219 | 0.2112   | -1.225 |
| 104471_at   | 2097.1 | 2486.3 | 2291.3 | 2219.8 | 2300.7 | 2804.4 | 2762.8 | 2259.2 | 0.186603017 | 2273.625 | 2531.775 | 258.15  | 0.898035963 | 0.1748   | 1.11   |
| 104473_at   | 408.6  | 452.9  | 518    | 468.7  | 470.6  | 497.4  | 413.8  | 417.6  | 0.702928375 | 462.05   | 449.85   | 12.2    | 1.027120151 | 0.7073   | -1.027 |
| 104474_s_at | 40.6   | 10.6   | 17.3   | 13.9   | 60.8   | 50.5   | 44.8   | 44.5   | 0.014263953 | 20.6     | 50.15    | 29.55   | 0.410767697 | 0.0143   | 2.77   |
| 104475_at   | 164    | 239.9  | 150.4  | 189.5  | 197.9  | 184.3  | 188    | 142.1  | 0.748620877 | 185.95   | 178.075  | 7.875   | 1.04422294  | 0.7888   | -1.036 |
| 104476_at   | 456.1  | 474    | 433.6  | 446.8  | 381.5  | 340.8  | 351.1  | 327.2  | 0.000547664 | 452.625  | 350.15   | 102.475 | 1.292660288 | 0.000466 | -1.294 |
| 104477_at   | 1176.6 | 1499.7 | 1303.2 | 1772.8 | 2022.2 | 1632.9 | 2125.8 | 2130.2 | 0.021934759 | 1438.075 | 1977.775 | 539.7   | 0.727117594 | 0.02468  | 1.384  |
| 104479_at   | 10.3   | 12.3   | 13.9   | 9.2    | 9      | 8.8    | 15.8   | 10.2   | 0.817054427 | 11.425   | 10.95    | 0.475   | 1.043378995 | 0.7313   | -1.061 |
| 104480_at   | 149.8  | 180.7  | 172    | 237.9  | 291.4  | 339    | 310.1  | 290.4  | 0.002626901 | 185.1    | 307.725  | 122.625 | 0.601511089 | 0.002378 | 1.683  |
| 104481_at   | 173.3  | 188.4  | 109.1  | 140.5  | 77.8   | 126.4  | 180.2  | 190.4  | 0.783070971 | 152.825  | 143.7    | 9.125   | 1.063500348 | 0.6951   | -1.104 |
| 104482_at   | 686.3  | 646.2  | 849.2  | 661.6  | 591.2  | 629.5  | 824    | 701.7  | 0.73910041  | 710.825  | 686.6    | 24.225  | 1.035282552 | 0.7152   | -1.037 |
| 104483_at   | 105.5  | 49.7   | 189.5  | 66.6   | 70.7   | 156.4  | 232.1  | 83.3   | 0.525664429 | 102.825  | 135.625  | 32.8    | 0.758156682 | 0.4938   | 1.34   |
| 104484_at   | 5      | 10.3   | 24     | 13.4   | 16.5   | 29.4   | 10.2   | 13.2   | 0.502725292 | 13.175   | 17.325   | 4.15    | 0.76046176  | 0.4183   | 1.412  |
| 104485_at   | 85.5   | 84.6   | 115.7  | 147.9  | 99.7   | 81.2   | 114.2  | 54.9   | 0.330548959 | 108.425  | 87.5     | 20.925  | 1.239142857 | 0.3253   | -1.25  |
| 104486_at   | 46.4   | 56.2   | 36.2   | 44.7   | 62.9   | 102.9  | 70.7   | 185.3  | 0.122104581 | 45.875   | 105.45   | 59.575  | 0.435040303 | 0.02759  | 2.117  |
| 104487_at   | 44.1   | 58     | 6.3    | 49.6   | 44.1   | 52.7   | 73.1   | 22.4   | 0.600688473 | 39.5     | 48.075   | 8.575   | 0.821632865 | 0.5253   | 1.478  |
| 104488_at   | 400.5  | 493.3  | 535.6  | 524.1  | 589.5  | 440.1  | 576.2  | 508.8  | 0.415896282 | 488.375  | 528.65   | 40.275  | 0.923815379 | 0.4351   | -1.082 |
| 104489_at   | 25.2   | 53.2   | 19.5   | 42.3   | 16.1   | 55.4   | 12.8   | 16.8   | 0.473026459 | 35.05    | 25.275   | 9.775   | 1.386745796 | 0.3176   | -1.551 |
| 104491_at   | 252.9  | 222.3  | 303.2  | 300.3  | 269    | 247.8  | 317.9  | 250.6  | 0.950395871 | 269.675  | 271.325  | 1.65    | 0.993918732 | 0.9253   | -1.009 |



|             |        |        |        |        |        |        |        |        |             |          |          |         |             |          |        |
|-------------|--------|--------|--------|--------|--------|--------|--------|--------|-------------|----------|----------|---------|-------------|----------|--------|
| 104492_at   | 96.6   | 108.9  | 123.5  | 146.6  | 113.1  | 122.2  | 106.4  | 160.3  | 0.696980579 | 118.9    | 125.5    | 6.6     | 0.947410359 | 0.688    | -1.055 |
| 104493_at   | 5.9    | 5.2    | 4.2    | 5.4    | 8.1    | 4.9    | 6.1    | 3      | 0.773105358 | 5.175    | 5.525    | 0.35    | 0.936651584 | 0.9762   | -1.007 |
| 104494_at   | 531.8  | 570.1  | 461    | 622.8  | 284.9  | 325.6  | 294.2  | 387.6  | 0.002424726 | 546.425  | 323.075  | 223.35  | 1.691325544 | 0.001375 | -1.694 |
| 104495_f_at | 18.6   | 33.6   | 26.9   | 13.2   | 50.9   | 25.9   | 58.6   | 48.6   | 0.039638267 | 23.075   | 46       | 22.925  | 0.501630435 | 0.04171  | 2.03   |
| 104496_i_at | 14.2   | 12.2   | 15     | 12     | 33.9   | 15.8   | 15.5   | 11.6   | 0.327107657 | 13.35    | 19.2     | 5.85    | 0.6953125   | 0.2748   | 1.327  |
| 104497_f_at | 9.2    | 22.8   | 10.1   | 12.9   | 44.6   | 19.8   | 17.5   | 24.7   | 0.12830638  | 13.75    | 26.65    | 12.9    | 0.515947467 | 0.06457  | 1.931  |
| 104498_at   | 29.7   | 24.2   | 23.6   | 11     | 3.1    | 3.5    | 11.9   | 2.2    | 0.01490289  | 22.125   | 5.175    | 16.95   | 4.275362319 | 0.009277 | -5.069 |
| 104499_at   | 50.4   | 67.4   | 26.6   | 71.9   | 57.1   | 51.6   | 25.7   | 16.8   | 0.294964414 | 54.075   | 37.8     | 16.275  | 1.430555556 | 0.3126   | -1.503 |
| 104500_at   | 75.3   | 139.3  | 101.9  | 162.6  | 162.7  | 213.9  | 206.9  | 202.2  | 0.020015325 | 119.775  | 196.425  | 76.65   | 0.609774723 | 0.02649  | 1.701  |
| 104501_at   | 119.5  | 186.1  | 204.7  | 179.2  | 176    | 248.5  | 219.5  | 334.8  | 0.121485373 | 172.375  | 244.7    | 72.325  | 0.704434001 | 0.1044   | 1.409  |
| 104502_f_at | 231.5  | 412.1  | 419.2  | 391.5  | 441.5  | 399.6  | 416    | 272.3  | 0.75841477  | 363.575  | 382.35   | 18.775  | 0.950895776 | 0.7454   | -1.063 |
| 104503_at   | 293.7  | 222.8  | 278.6  | 245.5  | 273    | 227.2  | 187.5  | 140.9  | 0.16568356  | 260.15   | 207.15   | 53      | 1.255853246 | 0.1551   | -1.286 |
| 104504_at   | 56.3   | 63.6   | 47.3   | 60.8   | 72.8   | 51.4   | 58.7   | 53.6   | 0.735722022 | 57       | 59.125   | 2.125   | 0.964059197 | 0.7531   | -1.034 |
| 104505_at   | 2      | 2.4    | 2.4    | 2.4    | 1.4    | 2.4    | 3.9    | 4.8    | 0.357566053 | 2.3      | 3.125    | 0.825   | 0.736       | 0.4974   | 1.215  |
| 104506_at   | 191.6  | 187.4  | 201.1  | 223.3  | 131.8  | 105.6  | 220.9  | 222.7  | 0.392046268 | 200.85   | 170.25   | 30.6    | 1.179735683 | 0.3065   | -1.239 |
| 104507_g_at | 153.5  | 217.4  | 236.4  | 193.5  | 230.1  | 183    | 147.1  | 209.6  | 0.769832787 | 200.2    | 192.45   | 7.75    | 1.0402702   | 0.7741   | -1.041 |
| 104508_at   | 116.9  | 99.7   | 142.4  | 139.5  | 104.7  | 130.8  | 120.5  | 117.2  | 0.605657668 | 124.625  | 118.3    | 6.325   | 1.053465765 | 0.6552   | -1.046 |
| 104509_at   | 21     | 22.6   | 46.4   | 45.4   | 39.6   | 26.4   | 33.2   | 22.7   | 0.688766282 | 33.85    | 30.475   | 3.375   | 1.110746514 | 0.8169   | -1.062 |
| 104510_at   | 148.1  | 118.7  | 111.8  | 160.8  | 53.7   | 152.3  | 73     | 130    | 0.272467362 | 134.85   | 102.25   | 32.6    | 1.318826406 | 0.2241   | -1.421 |
| 104512_at   | 593.5  | 641.2  | 528.8  | 535.5  | 491.4  | 597.9  | 509.1  | 609.7  | 0.592474031 | 574.75   | 552.025  | 22.725  | 1.041166614 | 0.5796   | -1.043 |
| 104513_at   | 936.3  | 838.2  | 607.5  | 795.8  | 947.9  | 960.6  | 855.6  | 1136   | 0.094045965 | 794.45   | 975.025  | 180.575 | 0.814799621 | 0.1001   | 1.236  |
| 104514_at   | 1491   | 2334.4 | 2072.3 | 2046.5 | 1821.2 | 2080.7 | 1940.9 | 1708.3 | 0.638993303 | 1986.05  | 1887.775 | 98.275  | 1.05205864  | 0.7138   | -1.041 |
| 104515_at   | 37.9   | 57.2   | 49.4   | 35.7   | 58.9   | 47.1   | 45.8   | 57.5   | 0.283161793 | 45.05    | 52.325   | 7.275   | 0.860965122 | 0.2573   | 1.175  |
| 104516_at   | 218.5  | 280.1  | 346.8  | 201.1  | 279.7  | 353.9  | 245.5  | 350.7  | 0.324847266 | 261.625  | 307.45   | 45.825  | 0.850951374 | 0.3007   | 1.189  |
| 104518_at   | 24.8   | 10.1   | 13.4   | 10.6   | 8.9    | 8      | 8.8    | 4.9    | 0.129249887 | 14.725   | 7.65     | 7.075   | 1.924836601 | 0.05035  | -1.845 |
| 104519_at   | 182.8  | 101.6  | 150.8  | 106.3  | 165.7  | 131.1  | 97.8   | 221.9  | 0.590103327 | 135.375  | 154.125  | 18.75   | 0.878345499 | 0.6258   | 1.122  |
| 104522_at   | 505.3  | 663    | 473.1  | 653.9  | 536.1  | 611.6  | 635.1  | 730.9  | 0.424966454 | 573.825  | 628.425  | 54.6    | 0.913116124 | 0.4079   | -1.101 |
| 104523_at   | 230.3  | 180.6  | 252.9  | 215.6  | 208.6  | 348.8  | 236.9  | 197.8  | 0.496046823 | 219.85   | 248.025  | 28.175  | 0.88640258  | 0.5124   | -1.107 |
| 104524_at   | 716.4  | 1056   | 860.5  | 1110.5 | 581.5  | 1055.4 | 599.1  | 1379   | 0.887052327 | 935.85   | 903.75   | 32.1    | 1.035518672 | 0.7199   | -1.093 |
| 104525_at   | 443.6  | 613.3  | 667.1  | 611.7  | 505    | 508.7  | 598.2  | 540.6  | 0.435411214 | 583.925  | 538.125  | 45.8    | 1.085110337 | 0.4883   | -1.075 |
| 104526_at   | 8.3    | 31.3   | 14.3   | 19.2   | 16.3   | 26.2   | 21     | 16.6   | 0.761254805 | 18.275   | 20.025   | 1.75    | 0.912609238 | 0.5574   | 1.205  |
| 104527_at   | 713.3  | 511.8  | 768.6  | 542.4  | 304.1  | 597.5  | 351.5  | 396.5  | 0.049379296 | 634.025  | 412.4    | 221.625 | 1.537403007 | 0.04391  | -1.566 |
| 104528_at   | 396.2  | 500.9  | 428.6  | 448.7  | 533.1  | 428.6  | 395.5  | 503.8  | 0.599697662 | 443.6    | 465.25   | 21.65   | 0.953465879 | 0.6233   | -1.045 |
| 104529_at   | 869.3  | 729.8  | 741.2  | 640.8  | 773    | 660.9  | 766.5  | 675.5  | 0.655525339 | 745.275  | 718.975  | 26.3    | 1.036579853 | 0.678    | -1.033 |
| 104531_at   | 438.2  | 625.1  | 628.6  | 503.2  | 677.1  | 896.5  | 671.5  | 777.9  | 0.02688876  | 548.775  | 755.75   | 206.975 | 0.72613298  | 0.02695  | 1.383  |
| 104532_at   | 1176.3 | 976.3  | 1192.4 | 1480.9 | 885.5  | 1008.2 | 1187.1 | 1550.8 | 0.795264655 | 1206.475 | 1157.9   | 48.575  | 1.041950946 | 0.7344   | -1.054 |
| 104533_at   | 653.8  | 895    | 796.8  | 805.6  | 864.8  | 1032.5 | 960    | 985.9  | 0.033587526 | 787.8    | 960.8    | 173     | 0.819941715 | 0.03637  | 1.225  |
| 104534_at   | 319.6  | 401.9  | 315.5  | 345.7  | 485.3  | 424    | 343.7  | 295.5  | 0.420728381 | 345.675  | 387.125  | 41.45   | 0.892928641 | 0.4484   | -1.105 |
| 104535_at   | 451.6  | 272.5  | 272.2  | 288    | 233.8  | 334.4  | 302.4  | 347.5  | 0.756951664 | 321.075  | 304.525  | 16.55   | 1.054346934 | 0.8003   | -1.041 |
| 104536_at   | 1894.2 | 2178.2 | 1781.4 | 1814.2 | 1760.4 | 1778.5 | 1630.2 | 1775.8 | 0.137426708 | 1917     | 1736.225 | 180.775 | 1.10411957  | 0.1022   | -1.101 |
| 104537_at   | 280.4  | 205.4  | 208.1  | 233.7  | 259.8  | 234    | 239    | 258.2  | 0.443597773 | 231.9    | 247.75   | 15.85   | 0.936024218 | 0.3784   | -1.076 |
| 104538_at   | 891.4  | 1037.9 | 780    | 843.6  | 1135.2 | 1037.9 | 924.3  | 1085   | 0.070170476 | 888.225  | 1045.6   | 157.375 | 0.849488332 | 0.06839  | 1.18   |
| 104539_at   | 4.4    | 6.3    | 12.4   | 18.6   | 8.9    | 6.6    | 12.6   | 11     | 0.860565712 | 10.425   | 9.775    | 0.65    | 1.066496164 | 0.8652   | -1.065 |
| 104541_at   | 64.5   | 73.1   | 87.3   | 37.4   | 79.8   | 91.6   | 17.8   | 68.1   | 0.950892128 | 65.575   | 64.325   | 1.25    | 1.019432569 | 0.7538   | -1.148 |
| 104544_at   | 723    | 592.6  | 696.9  | 559.1  | 574.9  | 718    | 569.6  | 616.4  | 0.674668945 | 642.9    | 619.725  | 23.175  | 1.037395619 | 0.6813   | -1.036 |
| 104545_at   | 364.7  | 310    | 300    | 332.6  | 299.5  | 361    | 368    | 362.4  | 0.371112635 | 326.825  | 347.725  | 20.9    | 0.939895032 | 0.3827   | -1.063 |
| 104546_g_at | 208.6  | 134.4  | 163.3  | 200.9  | 105.2  | 215    | 178.8  | 179.7  | 0.813617614 | 176.8    | 169.675  | 7.125   | 1.041992044 | 0.7604   | -1.061 |
| 104547_at   | 242.5  | 211    | 181.9  | 230    | 147.7  | 204.8  | 205.6  | 238.8  | 0.488873357 | 216.35   | 199.225  | 17.125  | 1.085958088 | 0.472    | -1.096 |
| 104548_at   | 90     | 90     | 128.1  | 102.4  | 120.3  | 145.5  | 135.7  | 155.7  | 0.02118476  | 102.625  | 139.3    | 36.675  | 0.736719311 | 0.02057  | 1.366  |
| 104549_at   | 1157.4 | 1035.1 | 1105.6 | 1060.7 | 1252.8 | 1159.6 | 996.1  | 1121.4 | 0.508768619 | 1089.7   | 1132.475 | 42.775  | 0.962228747 | 0.5268   | -1.037 |
| 104550_at   | 111.2  | 173    | 151    | 103.6  | 181.7  | 171.3  | 153.2  | 181    | 0.105687106 | 134.7    | 171.8    | 37.1    | 0.784051222 | 0.08651  | 1.301  |
| 104551_at   | 27.2   | 66.2   | 73.4   | 52.3   | 67.2   | 49.5   | 42.3   | 53.5   | 0.891644865 | 54.775   | 53.125   | 1.65    | 1.031058824 | 0.9335   | -1.021 |
| 104554_at   | 499.5  | 803    | 661.7  | 625    | 732.4  | 756.8  | 671.9  | 655.1  | 0.445834264 | 647.3    | 704.05   | 56.75   | 0.919394929 | 0.3875   | 1.101  |
| 104555_at   | 229.5  | 179.8  | 203.9  | 169.7  | 263.2  | 180.2  | 167.6  | 190.5  | 0.861218436 | 195.725  | 200.375  | 4.65    | 0.976793512 | 0.9074   | -1.015 |
| 104556_at   | 87.8   | 96.6   | 78.8   | 106.9  | 49.8   | 71.5   | 79.6   | 65.5   | 0.024816588 | 92.525   | 66.6     | 25.925  | 1.389264264 | 0.03082  | -1.4   |
| 104557_at   | 559.6  | 669.1  | 652.7  | 694.5  | 516.5  | 692.6  | 682.7  | 718.9  | 0.879570139 | 643.975  | 652.675  | 8.7     | 0.986670242 | 0.9276   | -1.009 |



|             |        |        |        |        |        |        |        |        |             |          |          |         |             |         |        |
|-------------|--------|--------|--------|--------|--------|--------|--------|--------|-------------|----------|----------|---------|-------------|---------|--------|
| 104558_at   | 249    | 581.9  | 350.9  | 400.7  | 230.5  | 355.7  | 397.5  | 385    | 0.53308861  | 395.625  | 342.175  | 53.45   | 1.156206619 | 0.5952  | -1.129 |
| 104559_at   | 2127.7 | 2569   | 2426.1 | 2013.7 | 3151.3 | 2346.3 | 2608.8 | 2376.4 | 0.193835994 | 2284.125 | 2620.7   | 336.575 | 0.871570573 | 0.1775  | 1.145  |
| 104560_at   | 360.6  | 597.7  | 470.4  | 519.4  | 647.8  | 600.3  | 622.3  | 566    | 0.085869934 | 487.025  | 609.1    | 122.075 | 0.79958135  | 0.07368 | 1.27   |
| 104561_at   | 420.4  | 447.9  | 360.7  | 315.2  | 329.4  | 357.3  | 436.4  | 388.4  | 0.835601325 | 386.05   | 377.875  | 8.175   | 1.021634138 | 0.8642  | -1.018 |
| 104562_at   | 234.1  | 178.8  | 229.6  | 267.9  | 217.1  | 215.6  | 222.4  | 233.6  | 0.79037122  | 227.6    | 222.175  | 5.425   | 1.024417689 | 0.8754  | -1.014 |
| 104564_at   | 3      | 2.7    | 2.2    | 5.8    | 4.2    | 5.7    | 3.9    | 2.8    | 0.500328061 | 3.425    | 4.15     | 0.725   | 0.825301205 | 0.4006  | 1.267  |
| 104565_at   | 903.9  | 753.3  | 770.5  | 700.4  | 792.7  | 768.8  | 702.3  | 628.9  | 0.341076507 | 782.025  | 723.175  | 58.85   | 1.08137726  | 0.3383  | -1.081 |
| 104566_at   | 67     | 92     | 70.1   | 91.1   | 81.8   | 94.6   | 87.7   | 86.8   | 0.346147608 | 80.05    | 87.725   | 7.675   | 0.912510687 | 0.3029  | -1.106 |
| 104567_at   | 340.1  | 362    | 325.2  | 290    | 354.2  | 341.4  | 336.8  | 255.1  | 0.79436623  | 329.325  | 321.875  | 7.45    | 1.023145631 | 0.7643  | -1.028 |
| 104568_at   | 160.8  | 227.2  | 220.7  | 180.4  | 294.7  | 239.5  | 279.9  | 292.4  | 0.008962553 | 197.275  | 276.625  | 79.35   | 0.713149571 | 0.0113  | 1.412  |
| 104569_at   | 341.1  | 530.1  | 288.7  | 437.9  | 458.9  | 533.8  | 424.5  | 529.6  | 0.211586107 | 399.45   | 486.7    | 87.25   | 0.820731457 | 0.1813  | 1.246  |
| 104571_at   | 18.4   | 33.4   | 28.9   | 26.8   | 38     | 27.3   | 31     | 73.3   | 0.239730996 | 26.875   | 42.4     | 15.525  | 0.63384434  | 0.1655  | 1.492  |
| 104572_at   | 594.4  | 669.7  | 584.2  | 527.8  | 844.8  | 630.4  | 641.9  | 645.7  | 0.166264837 | 594.025  | 690.7    | 96.675  | 0.8600333   | 0.1358  | 1.158  |
| 104573_at   | 1629.8 | 1656   | 1421.2 | 1239.3 | 2328.9 | 1229.9 | 1470.6 | 1181.7 | 0.827527877 | 1486.575 | 1552.775 | 66.2    | 0.95736665  | 0.9482  | -1.012 |
| 104574_at   | 512.2  | 867.6  | 793    | 769.1  | 611.3  | 777.5  | 704.5  | 794.4  | 0.883954882 | 735.475  | 721.925  | 13.55   | 1.018769263 | 0.9726  | -1.005 |
| 104576_at   | 1297.4 | 1902.2 | 1226.2 | 1597   | 1111.3 | 1430.3 | 1239.9 | 1578.1 | 0.411413929 | 1505.7   | 1339.9   | 165.8   | 1.123740578 | 0.4186  | -1.117 |
| 104577_at   | 273.1  | 242.1  | 275.3  | 279.3  | 291.6  | 285.4  | 271.3  | 281.4  | 0.185432113 | 267.45   | 282.425  | 14.975  | 0.946977074 | 0.1763  | -1.057 |
| 104578_f_at | 817.2  | 1297.1 | 903.4  | 1153.5 | 1081.1 | 1128.9 | 1066.2 | 1224.3 | 0.522219763 | 1042.8   | 1125.125 | 82.325  | 0.926830352 | 0.4418  | -1.096 |
| 104579_r_at | 219.7  | 318.7  | 274    | 362.8  | 151.9  | 375.2  | 244.9  | 280.7  | 0.60330259  | 293.8    | 263.175  | 30.625  | 1.116367436 | 0.5329  | -1.155 |
| 104580_at   | 557    | 606.7  | 607.4  | 622.6  | 686.1  | 614.4  | 631.5  | 680.8  | 0.055542931 | 598.425  | 653.2    | 54.775  | 0.916143601 | 0.05467 | -1.091 |
| 104581_at   | 38.5   | 47.6   | 54.8   | 39.1   | 34.5   | 40     | 56.3   | 56.1   | 0.809091797 | 45       | 46.725   | 1.725   | 0.963081862 | 0.8701  | -1.026 |
| 104582_g_at | 677.7  | 461.8  | 546.2  | 496.4  | 367.7  | 490.1  | 516.1  | 482.5  | 0.213362484 | 545.525  | 464.1    | 81.425  | 1.175447102 | 0.2081  | -1.173 |
| 104583_at   | 637.3  | 405.7  | 533.9  | 711.7  | 336.7  | 570    | 509    | 593.4  | 0.45865841  | 572.15   | 502.275  | 69.875  | 1.139117018 | 0.4877  | -1.141 |
| 104584_f_at | 11     | 12.1   | 7.1    | 9.8    | 68     | 8.8    | 31.4   | 42.4   | 0.109655998 | 10       | 37.65    | 27.65   | 0.26560425  | 0.04907 | 3.047  |
| 104585_at   | 253.1  | 254.4  | 312    | 303.6  | 389    | 281.8  | 300.8  | 333.9  | 0.16480068  | 280.775  | 326.375  | 45.6    | 0.860283416 | 0.1513  | 1.159  |
| 104586_at   | 524.7  | 623.2  | 643.8  | 621.3  | 450.7  | 644.2  | 590.9  | 640.8  | 0.698744188 | 603.25   | 581.65   | 21.6    | 1.037135735 | 0.6663  | -1.044 |
| 104587_at   | 800.7  | 765.3  | 673.8  | 663.5  | 841.2  | 823.8  | 882.5  | 993    | 0.020691458 | 725.825  | 885.125  | 159.3   | 0.82002542  | 0.01904 | 1.22   |
| 104588_at   | 30.5   | 44.7   | 14.9   | 21.8   | 20.8   | 18.8   | 20.9   | 20.5   | 0.31568286  | 27.975   | 20.25    | 7.725   | 1.381481481 | 0.3404  | -1.276 |
| 104589_at   | 962.1  | 920.2  | 944.1  | 1038.4 | 635.4  | 1057.3 | 965.7  | 1044   | 0.7144902   | 966.2    | 925.6    | 40.6    | 1.04386344  | 0.6326  | -1.064 |
| 104590_at   | 514.3  | 431.4  | 508.1  | 654.8  | 409.2  | 620.6  | 414.1  | 730.2  | 0.865935982 | 527.15   | 543.525  | 16.375  | 0.969872591 | 0.9555  | -1.01  |
| 104591_g_at | 262.8  | 197.8  | 198.5  | 278.7  | 177.6  | 246.3  | 143.5  | 205.6  | 0.224056401 | 234.45   | 193.25   | 41.2    | 1.213195343 | 0.2194  | -1.222 |
| 104592_i_at | 384.3  | 272.8  | 240.4  | 406.1  | 189.2  | 328.7  | 196.8  | 482    | 0.752288619 | 325.9    | 299.175  | 26.725  | 1.089328988 | 0.612   | -1.148 |
| 104593_at   | 294.9  | 270.2  | 252.8  | 260.5  | 338.5  | 206.3  | 227.3  | 208.4  | 0.502298863 | 269.6    | 245.125  | 24.475  | 1.099847017 | 0.3794  | -1.122 |
| 104594_at   | 45.4   | 74.5   | 81.4   | 72.6   | 86.2   | 78.2   | 38.8   | 109.3  | 0.589873504 | 68.475   | 78.125   | 9.65    | 0.87648     | 0.74    | -1.094 |
| 104595_at   | 1040.7 | 854    | 796    | 888    | 557.4  | 859.8  | 781.4  | 782.7  | 0.126636613 | 894.675  | 745.325  | 149.35  | 1.200382384 | 0.1363  | -1.21  |
| 104597_at   | 202.1  | 112.6  | 161.5  | 149.4  | 119.9  | 158.1  | 133.8  | 123.9  | 0.327877455 | 156.4    | 133.925  | 22.475  | 1.167817808 | 0.3436  | -1.15  |
| 104598_at   | 354    | 586.5  | 523.8  | 486.2  | 437.7  | 472.6  | 372.2  | 504.1  | 0.503390985 | 487.625  | 446.65   | 40.975  | 1.091738498 | 0.5634  | -1.08  |
| 104600_at   | 266.3  | 344.2  | 233.4  | 274.7  | 308.3  | 300.5  | 320.5  | 253.5  | 0.584764127 | 279.65   | 295.7    | 16.05   | 0.945722016 | 0.5426  | -1.064 |
| 104601_at   | 940.1  | 1089.8 | 906.4  | 1060.8 | 956.2  | 883.5  | 788.6  | 1036.1 | 0.27566451  | 999.275  | 916.1    | 83.175  | 1.09079249  | 0.2723  | -1.093 |
| 104602_at   | 157.4  | 207.1  | 169    | 175.3  | 163.2  | 150    | 197.3  | 154.4  | 0.494604346 | 177.2    | 166.225  | 10.975  | 1.066024966 | 0.4735  | -1.067 |
| 104603_at   | 338.7  | 347.2  | 380.5  | 285.2  | 487.6  | 330.4  | 357.2  | 420.4  | 0.193356304 | 337.9    | 398.9    | 61      | 0.847079469 | 0.1805  | 1.173  |
| 104604_at   | 193.4  | 154.9  | 149    | 172.2  | 155.5  | 185.5  | 182.6  | 156.6  | 0.842306828 | 167.375  | 170.05   | 2.675   | 0.984269333 | 0.8254  | -1.018 |
| 104605_at   | 633.6  | 912.7  | 870.3  | 964    | 713.9  | 666.9  | 762.6  | 809.3  | 0.248016251 | 845.15   | 738.175  | 106.975 | 1.14491821  | 0.2695  | -1.134 |
| 104606_at   | 216.8  | 182.3  | 328.9  | 176.5  | 300    | 268.2  | 242    | 281.4  | 0.284651091 | 226.125  | 272.9    | 46.775  | 0.82860022  | 0.1971  | 1.243  |
| 104607_at   | 287.6  | 308.9  | 193.2  | 269.6  | 238.4  | 321    | 301.4  | 303.9  | 0.43151814  | 264.825  | 291.175  | 26.35   | 0.909504593 | 0.4311  | 1.109  |
| 104608_at   | 83.1   | 126.3  | 117.2  | 75.2   | 165.1  | 104.6  | 123.6  | 88.6   | 0.373894503 | 100.45   | 120.475  | 20.025  | 0.833782943 | 0.3679  | 1.196  |
| 104609_at   | 327    | 430.3  | 341.2  | 426    | 377.1  | 379.9  | 327.6  | 447.3  | 0.961499128 | 381.125  | 382.975  | 1.85    | 0.995169397 | 0.9481  | -1.007 |
| 104610_at   | 115.3  | 189.6  | 114.5  | 149.3  | 157.6  | 128.5  | 163.9  | 137.6  | 0.820808274 | 142.175  | 146.9    | 4.725   | 0.967835262 | 0.7199  | -1.051 |
| 104611_at   | 301.6  | 334.7  | 306.5  | 316.6  | 261.2  | 334.4  | 307.2  | 281.9  | 0.341706711 | 314.85   | 296.175  | 18.675  | 1.063053938 | 0.309   | -1.067 |
| 104612_g_at | 259.3  | 337.2  | 276.5  | 347.1  | 269.8  | 340.1  | 255.7  | 299.1  | 0.64685637  | 305.025  | 291.175  | 13.85   | 1.047565897 | 0.6567  | -1.046 |
| 104614_at   | 1187.9 | 1991.1 | 1254.3 | 1504.5 | 1997.3 | 1630   | 1842.4 | 1808.6 | 0.164328451 | 1484.45  | 1819.575 | 335.125 | 0.815822376 | 0.1229  | 1.249  |
| 104615_at   | 24.9   | 15.7   | 15.6   | 17.7   | 14.2   | 7.8    | 16.6   | 26.4   | 0.638621568 | 18.475   | 16.25    | 2.225   | 1.136923077 | 0.4955  | -1.221 |
| 104616_g_at | 375.9  | 365.4  | 439.8  | 391    | 365.2  | 549.2  | 414.6  | 419.5  | 0.359016993 | 393.025  | 437.125  | 44.1    | 0.899113526 | 0.3446  | -1.102 |
| 104617_at   | 16.4   | 42.6   | 37.3   | 10.3   | 17.8   | 17.4   | 17     | 19     | 0.341983332 | 26.65    | 17.8     | 8.85    | 1.497191011 | 0.4902  | -1.282 |
| 104618_at   | 1183.8 | 896.1  | 1028.6 | 1129.4 | 902.9  | 989.2  | 968.2  | 1110.9 | 0.422328645 | 1059.475 | 992.8    | 66.675  | 1.067158541 | 0.438   | -1.064 |
| 104619_at   | 173.2  | 183.7  | 142.2  | 182.8  | 250.6  | 194.3  | 239.4  | 199.4  | 0.029842468 | 170.475  | 220.925  | 50.45   | 0.77164196  | 0.02589 | 1.295  |



|             |        |        |        |        |        |        |        |        |             |          |          |          |             |          |        |
|-------------|--------|--------|--------|--------|--------|--------|--------|--------|-------------|----------|----------|----------|-------------|----------|--------|
| 104620_at   | 473.2  | 313.9  | 344.6  | 371.9  | 233.3  | 302.4  | 346.8  | 428    | 0.402147327 | 375.9    | 327.625  | 48.275   | 1.14734834  | 0.3713   | -1.161 |
| 104621_at   | 1055.5 | 1225.9 | 948.8  | 1274.9 | 1058.5 | 1046.4 | 1068.7 | 1247.4 | 0.82312001  | 1126.275 | 1105.25  | 21.025   | 1.019022846 | 0.8613   | -1.015 |
| 104622_at   | 159    | 178.4  | 153    | 185.1  | 154.5  | 195.5  | 170.1  | 187.4  | 0.528166149 | 168.875  | 176.875  | 8        | 0.954770318 | 0.5377   | -1.046 |
| 104623_at   | 187.6  | 356.1  | 287.3  | 314.6  | 291.2  | 276.9  | 255    | 373.1  | 0.785060342 | 286.4    | 299.05   | 12.65    | 0.957699381 | 0.7239   | -1.062 |
| 104624_at   | 818.8  | 1410.8 | 1223.9 | 1255.6 | 1172.8 | 1235.8 | 1472.6 | 1252.8 | 0.492158581 | 1177.275 | 1283.5   | 106.225  | 0.917238021 | 0.4554   | 1.108  |
| 104625_at   | 314.5  | 329.6  | 376.7  | 342.8  | 269.2  | 390.3  | 412    | 411.5  | 0.463018414 | 340.9    | 370.75   | 29.85    | 0.919487525 | 0.5384   | -1.074 |
| 104626_at   | 301.6  | 285.5  | 259.8  | 226.3  | 201.5  | 247.5  | 180.7  | 221.2  | 0.043923848 | 268.3    | 212.725  | 55.575   | 1.261252791 | 0.04428  | -1.262 |
| 104627_at   | 161.1  | 187.6  | 181.5  | 145.3  | 216.3  | 198.8  | 168.4  | 160.8  | 0.332635961 | 168.875  | 186.075  | 17.2     | 0.907564154 | 0.3375   | -1.099 |
| 104628_at   | 678.8  | 681.4  | 694.3  | 620.5  | 611.3  | 679.8  | 425.7  | 607    | 0.206005553 | 668.75   | 580.95   | 87.8     | 1.151131767 | 0.192    | -1.167 |
| 104629_at   | 933.3  | 580.9  | 782.9  | 734.9  | 551.2  | 697.4  | 596.8  | 720    | 0.222660764 | 758      | 641.35   | 116.65   | 1.181881968 | 0.2223   | -1.172 |
| 104630_at   | 9.5    | 99.9   | 16.4   | 22     | 23.9   | 26.1   | 38.2   | 27.1   | 0.728187771 | 36.95    | 28.825   | 8.125    | 1.281873374 | 0.7678   | 1.172  |
| 104631_g_at | 62.3   | 76.1   | 38.5   | 59.7   | 77.8   | 51.7   | 55.7   | 60.6   | 0.820412415 | 59.15    | 61.45    | 2.3      | 0.962571196 | 0.7539   | -1.057 |
| 104632_at   | 500    | 599.5  | 469.2  | 425.4  | 645.1  | 416.8  | 419.8  | 551.3  | 0.889309178 | 498.525  | 508.25   | 9.725    | 0.980865716 | 0.942    | -1.01  |
| 104633_at   | 385.2  | 386.8  | 313    | 292.7  | 306.9  | 435.6  | 374.4  | 388.4  | 0.410649899 | 344.425  | 376.325  | 31.9     | 0.915232844 | 0.4203   | -1.092 |
| 104634_at   | 1486.1 | 1530.7 | 1297.1 | 1480.1 | 1249.1 | 1440.4 | 1297.1 | 1257.2 | 0.091239428 | 1448.5   | 1310.95  | 137.55   | 1.10492391  | 0.09135  | -1.105 |
| 104635_r_at | 97.6   | 154.3  | 153.2  | 84.7   | 76.4   | 127.2  | 97.1   | 81.6   | 0.267045052 | 122.45   | 95.575   | 26.875   | 1.281192781 | 0.2696   | -1.263 |
| 104636_at   | 4707.3 | 4117.3 | 4896.1 | 4484.9 | 3178.2 | 2335.6 | 2662.2 | 1454.2 | 0.004943504 | 4551.4   | 2407.55  | 2143.85  | 1.890469564 | 0.007715 | -1.962 |
| 104637_at   | 6241.8 | 5359.1 | 6757.3 | 5741.8 | 3835.8 | 2923   | 3491.4 | 2416.1 | 0.00060632  | 6025     | 3166.575 | 2858.425 | 1.902686657 | 0.001197 | -1.925 |
| 104638_at   | 91.2   | 76.2   | 96.8   | 75     | 118.5  | 96.8   | 128.1  | 114.5  | 0.013751664 | 84.8     | 114.475  | 29.675   | 0.740773095 | 0.01356  | 1.351  |
| 104639_i_at | 819.1  | 855.7  | 863.3  | 432.6  | 935.1  | 883.1  | 911.8  | 556.5  | 0.585171173 | 742.675  | 821.625  | 78.95    | 0.903909935 | 0.5931   | 1.125  |
| 104640_f_at | 633.3  | 658.3  | 660.9  | 529.4  | 887.8  | 771.1  | 732.6  | 609.4  | 0.108070454 | 620.475  | 750.225  | 129.75   | 0.827051884 | 0.09605  | 1.203  |
| 104641_f_at | 523.5  | 777.9  | 470.3  | 796.8  | 689.4  | 594.5  | 427.3  | 709.4  | 0.740723669 | 642.125  | 605.15   | 36.975   | 1.061100554 | 0.7827   | -1.053 |
| 104642_at   | 51.4   | 33.4   | 62.1   | 65.9   | 44.5   | 41.3   | 54.6   | 63.9   | 0.820191469 | 53.2     | 51.075   | 2.125    | 1.041605482 | 0.9052   | -1.023 |
| 104643_at   | 106.3  | 122.5  | 120    | 115.4  | 94.6   | 146.4  | 139.3  | 131.3  | 0.387623293 | 116.05   | 127.9    | 11.85    | 0.907349492 | 0.4443   | -1.088 |
| 104644_at   | 864.4  | 646.9  | 744.2  | 698.6  | 598.9  | 580    | 631.5  | 445.9  | 0.030799832 | 738.525  | 564.075  | 174.45   | 1.309267385 | 0.03312  | -1.313 |
| 104645_at   | 288.9  | 441.8  | 297.6  | 264    | 584.9  | 436.7  | 455.3  | 283.7  | 0.170943546 | 323.075  | 440.15   | 117.075  | 0.734011133 | 0.1657   | 1.347  |
| 104646_at   | 184.7  | 325    | 223.6  | 159.4  | 57     | 52     | 128    | 87     | 0.021618757 | 223.175  | 81       | 142.175  | 2.755246914 | 0.00686  | -2.837 |
| 104647_at   | 7.2    | 16.4   | 1.9    | 14.4   | 7      | 22.7   | 2.7    | 17.3   | 0.68266439  | 9.975    | 12.425   | 2.45     | 0.802816901 | 0.7698   | 1.235  |
| 104648_at   | 212.8  | 410.6  | 296.7  | 302.9  | 313.7  | 312.3  | 326    | 314.1  | 0.808006162 | 305.75   | 316.525  | 10.775   | 0.965958455 | 0.6663   | -1.063 |
| 104650_at   | 30.1   | 23.3   | 22.3   | 28.2   | 33.2   | 21.3   | 46.8   | 40     | 0.185037377 | 25.975   | 35.325   | 9.35     | 0.735314933 | 0.1884   | 1.317  |
| 104651_at   | 429.7  | 391.9  | 442.5  | 419.7  | 419.3  | 488.6  | 536.6  | 400.6  | 0.296809478 | 420.95   | 461.275  | 40.325   | 0.912579264 | 0.2823   | 1.089  |
| 104652_at   | 131.6  | 228.1  | 139.3  | 198    | 124    | 120.2  | 139    | 144.6  | 0.165913337 | 174.25   | 131.95   | 42.3     | 1.320575976 | 0.1216   | -1.289 |
| 104653_at   | 153.5  | 123.4  | 172.4  | 143.1  | 133    | 178.2  | 105.3  | 92.4   | 0.381062673 | 148.1    | 127.225  | 20.875   | 1.164079387 | 0.3124   | -1.193 |
| 104654_at   | 74.6   | 8.9    | 43.8   | 37.4   | 32.8   | 61.8   | 45.6   | 15.5   | 0.897443314 | 41.175   | 38.925   | 2.25     | 1.057803468 | 0.9039   | -1.071 |
| 104655_at   | 176.9  | 335.6  | 297.9  | 248.1  | 273.3  | 325.9  | 323    | 344.7  | 0.235108994 | 264.625  | 316.725  | 52.1     | 0.835503986 | 0.2184   | 1.226  |
| 104657_at   | 89.3   | 104.5  | 72.1   | 82     | 81.6   | 100    | 78.9   | 98.2   | 0.768595814 | 86.975   | 89.675   | 2.7      | 0.969891274 | 0.7424   | -1.035 |
| 104658_at   | 87.4   | 67.9   | 110.1  | 85.1   | 90.7   | 79     | 98.7   | 72.9   | 0.833649511 | 87.625   | 85.325   | 2.3      | 1.026955757 | 0.88     | -1.019 |
| 104659_g_at | 87.7   | 58.4   | 62.6   | 71.5   | 90.1   | 67.9   | 72.9   | 81.1   | 0.367525798 | 70.05    | 78       | 7.95     | 0.898076923 | 0.3371   | -1.12  |
| 104660_at   | 60.7   | 71.9   | 104    | 103.6  | 113.4  | 98.5   | 134.5  | 70.9   | 0.310576876 | 85.05    | 104.325  | 19.275   | 0.815240834 | 0.3267   | 1.227  |
| 104661_at   | 166.8  | 241.1  | 171.2  | 194.7  | 151.7  | 211    | 170.4  | 226    | 0.884581619 | 193.45   | 189.775  | 3.675    | 1.019365038 | 0.872    | -1.021 |
| 104662_at   | 144.8  | 138.3  | 160.9  | 110.9  | 212.3  | 119.6  | 159.8  | 159.3  | 0.321776281 | 138.725  | 162.75   | 24.025   | 0.852380952 | 0.3333   | 1.16   |
| 104663_at   | 495.8  | 639.7  | 596.3  | 573.9  | 734.3  | 614.5  | 670.2  | 578    | 0.16147208  | 576.425  | 649.25   | 72.825   | 0.887832114 | 0.1625   | 1.127  |
| 104664_at   | 40.3   | 17.3   | 19.4   | 12.6   | 12.5   | 66.5   | 39.6   | 18.9   | 0.424642077 | 22.4     | 34.375   | 11.975   | 0.651636364 | 0.4962   | 1.382  |
| 104665_g_at | 57     | 107    | 123.3  | 101.2  | 86.9   | 71.7   | 54.9   | 109.9  | 0.410786251 | 97.125   | 80.85    | 16.275   | 1.201298701 | 0.4621   | -1.193 |
| 104666_at   | 102.4  | 180    | 162.3  | 175.6  | 171.6  | 179.1  | 172.8  | 207.1  | 0.232235521 | 155.075  | 182.65   | 27.575   | 0.849028196 | 0.2332   | 1.203  |
| 104667_at   | 16.1   | 11.2   | 10.5   | 11.8   | 10.2   | 32.2   | 8.6    | 43.6   | 0.280811799 | 12.4     | 23.65    | 11.25    | 0.524312896 | 0.3455   | 1.533  |
| 104669_at   | 57.1   | 26.5   | 30.7   | 27.6   | 17.8   | 54     | 81.8   | 47.7   | 0.370730308 | 35.475   | 50.325   | 14.85    | 0.704918033 | 0.4934   | 1.309  |
| 104670_at   | 380    | 304.4  | 293.3  | 272.6  | 211.3  | 269.9  | 281.1  | 222.8  | 0.066525924 | 312.575  | 246.275  | 66.3     | 1.269211248 | 0.05541  | -1.268 |
| 104671_at   | 218    | 266    | 193.5  | 173.9  | 343.7  | 329.9  | 228.9  | 256.1  | 0.071044509 | 212.85   | 289.65   | 76.8     | 0.734852408 | 0.06226  | 1.359  |
| 104672_at   | 26.7   | 11.6   | 6.6    | 10     | 11.3   | 15.3   | 7.9    | 15.7   | 0.819208628 | 13.725   | 12.55    | 1.175    | 1.093625498 | 0.9713   | -1.013 |
| 104673_at   | 101    | 63.9   | 80.2   | 62.9   | 83.5   | 93     | 89.9   | 81.3   | 0.35454232  | 77       | 86.925   | 9.925    | 0.88582111  | 0.277    | 1.149  |
| 104674_s_at | 49.2   | 61.3   | 72.4   | 23.2   | 29.7   | 27.2   | 69.2   | 63.7   | 0.798638381 | 51.525   | 47.45    | 4.075    | 1.085879874 | 0.811    | -1.092 |
| 104675_at   | 9.9    | 16.9   | 16.3   | 19     | 12.2   | 26.8   | 10.4   | 16.4   | 0.83372878  | 15.525   | 16.45    | 0.925    | 0.943768997 | 0.9455   | -1.018 |
| 104677_at   | 389.1  | 557.5  | 523.8  | 474.6  | 634.9  | 535.2  | 567    | 451.6  | 0.292318234 | 486.25   | 547.175  | 60.925   | 0.888655366 | 0.302    | 1.127  |
| 104678_at   | 173.1  | 186    | 186.3  | 257.8  | 140.7  | 121.1  | 161.6  | 130.5  | 0.039759996 | 200.8    | 138.475  | 62.325   | 1.450081242 | 0.01515  | -1.44  |
| 104679_at   | 39.3   | 43.2   | 12.6   | 11.5   | 31.4   | 19.6   | 14.6   | 81.3   | 0.590554497 | 26.65    | 36.725   | 10.075   | 0.725663717 | 0.6195   | 1.312  |



|             |        |        |        |        |        |        |        |        |             |          |          |         |             |         |        |
|-------------|--------|--------|--------|--------|--------|--------|--------|--------|-------------|----------|----------|---------|-------------|---------|--------|
| 104680_at   | 594.9  | 596    | 589.7  | 491.7  | 675.9  | 736    | 563.2  | 618    | 0.132121683 | 568.075  | 648.275  | 80.2    | 0.87628707  | 0.1305  | 1.139  |
| 104681_at   | 269    | 251.9  | 281.7  | 247.6  | 241.2  | 249.9  | 215.3  | 307    | 0.682398903 | 262.55   | 253.35   | 9.2     | 1.0363134   | 0.6118  | -1.044 |
| 104682_at   | 356.8  | 306    | 372.8  | 349.8  | 330.9  | 290.9  | 342.4  | 460.3  | 0.815367925 | 346.35   | 356.125  | 9.775   | 0.972551773 | 0.8862  | -1.016 |
| 104683_at   | 611.1  | 647    | 667.4  | 741.5  | 570.5  | 695.3  | 659.8  | 702.1  | 0.818192866 | 666.75   | 656.925  | 9.825   | 1.014956045 | 0.8102  | -1.016 |
| 104684_at   | 611.4  | 516.4  | 622.8  | 327.2  | 837    | 442.4  | 577.2  | 346.1  | 0.814799385 | 519.45   | 550.675  | 31.225  | 0.943296863 | 0.8899  | -1.035 |
| 104685_g_at | 10.1   | 9.7    | 8.7    | 9.7    | 7.6    | 7.1    | 9.7    | 14.9   | 0.888268969 | 9.55     | 9.825    | 0.275   | 0.972010178 | 0.9462  | -1.012 |
| 104686_at   | 37.5   | 36.8   | 36     | 57     | 23.7   | 53.1   | 25.4   | 31     | 0.355783371 | 41.825   | 33.3     | 8.525   | 1.256006006 | 0.2632  | -1.3   |
| 104687_at   | 23.6   | 23.8   | 34.4   | 26.9   | 83.2   | 47.5   | 56.8   | 33.1   | 0.07332207  | 27.175   | 55.15    | 27.975  | 0.492747053 | 0.01971 | 1.945  |
| 104688_at   | 131    | 167.3  | 157.4  | 140.1  | 189    | 188.2  | 191.2  | 166.8  | 0.015710977 | 148.95   | 183.8    | 34.85   | 0.81039173  | 0.0157  | 1.238  |
| 104689_at   | 140.1  | 223.9  | 174.3  | 216.4  | 204.7  | 259.9  | 269.3  | 221.1  | 0.09336056  | 188.675  | 238.75   | 50.075  | 0.79026178  | 0.1002  | 1.279  |
| 104690_at   | 476.3  | 570.9  | 602.2  | 664.6  | 514.7  | 546.1  | 551.2  | 675.1  | 0.902911206 | 578.5    | 571.775  | 6.725   | 1.01176162  | 0.917   | -1.01  |
| 104692_at   | 12.4   | 11.2   | 14.4   | 12.2   | 11     | 13.8   | 14.5   | 17.2   | 0.328414045 | 12.55    | 14.125   | 1.575   | 0.888495575 | 0.3402  | 1.115  |
| 104693_at   | 192.3  | 160.9  | 200.3  | 228.2  | 176.8  | 227.1  | 155.8  | 168.2  | 0.543859974 | 195.425  | 181.975  | 13.45   | 1.073911252 | 0.5216  | -1.077 |
| 104694_at   | 322    | 227.9  | 270.3  | 349.2  | 280.3  | 238.7  | 240.2  | 367.5  | 0.801041508 | 292.35   | 281.675  | 10.675  | 1.037898287 | 0.7836  | -1.041 |
| 104695_at   | 47.3   | 103.4  | 159.7  | 105.9  | 124.5  | 119.9  | 73.1   | 109.2  | 0.923920766 | 104.075  | 106.675  | 2.6     | 0.975626904 | 0.7564  | 1.096  |
| 104696_at   | 111.2  | 107.9  | 110.4  | 104.7  | 117.4  | 146.3  | 105.9  | 112.7  | 0.270110953 | 108.55   | 120.575  | 12.025  | 0.900269542 | 0.2229  | 1.102  |
| 104697_at   | 819.3  | 756.6  | 771.1  | 745    | 697.8  | 941.9  | 597.2  | 686.3  | 0.612680594 | 773      | 730.8    | 42.2    | 1.057744937 | 0.5037  | -1.072 |
| 104698_at   | 600.4  | 1002.9 | 645    | 841.4  | 624.5  | 854.1  | 782.1  | 818.8  | 0.981784123 | 772.425  | 769.875  | 2.55    | 1.003312226 | 0.9387  | -1.011 |
| 104699_at   | 256    | 358.9  | 336.1  | 429.7  | 301.3  | 390.8  | 357.3  | 357.3  | 0.878876093 | 345.175  | 351.675  | 6.5     | 0.981517026 | 0.8043  | -1.032 |
| 104700_at   | 18.6   | 21.2   | 13.6   | 10.5   | 43.4   | 8.3    | 27.4   | 19.8   | 0.327512616 | 15.975   | 24.725   | 8.75    | 0.646107179 | 0.4466  | 1.366  |
| 104701_at   | 470.4  | 385.1  | 324.8  | 344    | 225.3  | 356.7  | 268.9  | 273.3  | 0.057468313 | 381.075  | 281.05   | 100.025 | 1.355897527 | 0.04906 | -1.361 |
| 104702_at   | 123.9  | 138.2  | 175.4  | 114.3  | 70.6   | 173.1  | 127.8  | 122.7  | 0.587561696 | 137.95   | 123.55   | 14.4    | 1.116552003 | 0.5106  | -1.157 |
| 104704_at   | 489    | 383.4  | 494.5  | 445.9  | 271.8  | 491.7  | 492.3  | 468.3  | 0.725758729 | 453.2    | 431.025  | 22.175  | 1.051447132 | 0.6543  | -1.076 |
| 104706_at   | 221.6  | 213.3  | 248.5  | 321.8  | 235.6  | 272.9  | 296.4  | 276    | 0.528647827 | 251.3    | 270.225  | 18.925  | 0.929965769 | 0.4602  | -1.086 |
| 104707_at   | 162.1  | 134.4  | 182.6  | 125.4  | 181.9  | 157.3  | 113.7  | 187    | 0.692196498 | 151.125  | 159.975  | 8.85    | 0.944678856 | 0.7418  | -1.051 |
| 104708_at   | 276    | 310.4  | 349.4  | 318.3  | 328.4  | 310.4  | 373.6  | 259.4  | 0.880567762 | 313.525  | 317.95   | 4.425   | 0.986082717 | 0.923   | -1.009 |
| 104709_at   | 2887.3 | 2146.9 | 2480.4 | 2323.6 | 2600.3 | 2392.1 | 2595.2 | 2480.9 | 0.747663822 | 2459.55  | 2517.125 | 57.575  | 0.977126682 | 0.6804  | -1.029 |
| 104710_at   | 414.1  | 390.4  | 433.1  | 408.3  | 346.4  | 419.6  | 422.3  | 336.9  | 0.289584121 | 411.475  | 381.3    | 30.175  | 1.079137162 | 0.2539  | -1.084 |
| 104711_at   | 1160   | 895.9  | 1081.5 | 1004.2 | 974.4  | 1076.4 | 1202.3 | 1090.3 | 0.516920977 | 1035.4   | 1085.85  | 50.45   | 0.953538702 | 0.5075  | -1.051 |
| 104712_at   | 89.6   | 121.2  | 76.6   | 114.1  | 82.3   | 101.4  | 93.3   | 97.6   | 0.581529004 | 100.375  | 93.65    | 6.725   | 1.071809931 | 0.6484  | -1.057 |
| 104713_at   | 956.3  | 698.5  | 735.9  | 778.3  | 732.4  | 665.6  | 758.8  | 576    | 0.176054038 | 792.25   | 683.2    | 109.05  | 1.159616511 | 0.164   | -1.158 |
| 104714_at   | 524.5  | 714.2  | 596.8  | 792.5  | 819.9  | 1019.9 | 1044.7 | 1406.8 | 0.03372889  | 657      | 1072.825 | 415.825 | 0.612401836 | 0.01523 | 1.623  |
| 104715_at   | 772.7  | 1381.5 | 1062   | 1109.7 | 942.3  | 1189.4 | 1260.1 | 996.5  | 0.919085057 | 1081.475 | 1097.075 | 15.6    | 0.985780371 | 0.8465  | -1.028 |
| 104716_at   | 1965.6 | 2139.1 | 1847.9 | 1640.1 | 2384.1 | 1646.8 | 1715.6 | 1893.5 | 0.954343783 | 1898.175 | 1910     | 11.825  | 0.993808901 | 0.9985  | -1     |
| 104717_at   | 3638.8 | 3035.5 | 3018.3 | 3140.9 | 2677.6 | 2844.6 | 2754   | 2310.4 | 0.025381004 | 3208.375 | 2646.65  | 561.725 | 1.212240002 | 0.023   | -1.212 |
| 104719_at   | 558.6  | 610.9  | 457.3  | 749.1  | 527.1  | 689.4  | 643    | 687.1  | 0.577316634 | 593.975  | 636.65   | 42.675  | 0.932969449 | 0.5344  | -1.082 |
| 104720_at   | 561.5  | 623.4  | 656.9  | 643.4  | 399.8  | 681.3  | 647.2  | 817.7  | 0.875013019 | 621.3    | 636.5    | 15.2    | 0.976119403 | 0.9683  | -1.007 |
| 104722_at   | 202.2  | 239.7  | 223.9  | 233.1  | 216.7  | 314.5  | 184.8  | 219.3  | 0.772798842 | 224.725  | 233.825  | 9.1     | 0.961082006 | 0.8594  | -1.022 |
| 104723_at   | 2.8    | 3.3    | 23.3   | 2.6    | 7.3    | 5.1    | 5.6    | 4.4    | 0.671495778 | 8        | 5.6      | 2.4     | 1.428571429 | 0.8234  | 1.133  |
| 104725_at   | 373.4  | 594.1  | 432.7  | 465.7  | 352.9  | 488.1  | 428.3  | 426.5  | 0.469223462 | 466.475  | 423.95   | 42.525  | 1.10030664  | 0.4841  | -1.092 |
| 104726_at   | 133    | 140.4  | 131.1  | 130.5  | 151.3  | 140.9  | 122.8  | 217.7  | 0.323633178 | 133.75   | 158.175  | 24.425  | 0.845582425 | 0.2852  | 1.156  |
| 104727_at   | 59     | 45.5   | 92.3   | 59.5   | 122.7  | 22.4   | 33.1   | 44.4   | 0.751457685 | 64.075   | 55.65    | 8.425   | 1.151392633 | 0.4413  | -1.382 |
| 104728_at   | 550.6  | 495    | 512.5  | 530.2  | 546.8  | 717.7  | 697.4  | 624    | 0.043853334 | 522.075  | 646.475  | 124.4   | 0.807571832 | 0.01933 | 1.232  |
| 104729_at   | 51.3   | 74.3   | 27     | 32.9   | 33.3   | 27.4   | 36     | 89.3   | 0.99467134  | 46.375   | 46.5     | 0.125   | 0.997311828 | 0.9218  | -1.036 |
| 104730_at   | 237.1  | 505.5  | 464    | 321.5  | 312.7  | 480.3  | 408.3  | 311.8  | 0.96175703  | 382.025  | 378.275  | 3.75    | 1.009913423 | 0.937   | -1.017 |
| 104731_at   | 167.3  | 287.7  | 199.1  | 260.4  | 172.1  | 189.9  | 249.9  | 212.1  | 0.514948304 | 228.625  | 206      | 22.625  | 1.109830097 | 0.5585  | -1.096 |
| 104733_at   | 452.3  | 231.7  | 390.3  | 366.7  | 311.1  | 377.7  | 389.5  | 322.5  | 0.851740116 | 360.25   | 350.2    | 10.05   | 1.028697887 | 0.9797  | -1.004 |
| 104735_at   | 459.6  | 713    | 542.8  | 606.6  | 533.9  | 792.6  | 590.1  | 714.4  | 0.368277465 | 580.5    | 657.75   | 77.25   | 0.882554162 | 0.3669  | 1.134  |
| 104737_at   | 4.7    | 8.2    | 7.7    | 5.5    | 10.5   | 3      | 10.7   | 7.1    | 0.548340392 | 6.525    | 7.825    | 1.3     | 0.833865815 | 0.788   | 1.096  |
| 104738_at   | 1320.5 | 1200.4 | 1311.4 | 1366   | 1149.2 | 1326.6 | 1296   | 1845.9 | 0.545769908 | 1299.575 | 1404.425 | 104.85  | 0.925343112 | 0.5739  | -1.065 |
| 104739_at   | 538.4  | 591.9  | 537.9  | 521.2  | 644.7  | 497.6  | 496.3  | 585.2  | 0.837363429 | 547.35   | 555.95   | 8.6     | 0.984530983 | 0.886   | -1.011 |
| 104740_at   | 989.8  | 648.3  | 744.2  | 917    | 588.4  | 773.3  | 664.9  | 948.6  | 0.491101229 | 824.825  | 743.8    | 81.025  | 1.108933853 | 0.4829  | -1.111 |
| 104741_at   | 272.1  | 416.9  | 360.5  | 367.6  | 400    | 384.3  | 348.9  | 288.7  | 0.976459462 | 354.275  | 355.475  | 1.2     | 0.996624235 | 0.9515  | -1.007 |
| 104742_at   | 33.9   | 37.6   | 45.7   | 46.1   | 51.1   | 62.3   | 49.3   | 40.2   | 0.126606069 | 40.825   | 50.725   | 9.9     | 0.804829966 | 0.1189  | 1.238  |
| 104743_at   | 11.7   | 10.5   | 9      | 9.2    | 9.9    | 14.2   | 13.6   | 12     | 0.096957091 | 10.1     | 12.425   | 2.325   | 0.812877264 | 0.0905  | 1.226  |
| 104744_at   | 1405.6 | 1224.9 | 1225.8 | 1228.3 | 1097.7 | 1404.6 | 1187.7 | 1377.2 | 0.961938737 | 1271.15  | 1266.8   | 4.35    | 1.003433849 | 0.9231  | -1.007 |



|             |        |        |        |        |        |        |        |        |             |          |          |         |             |         |        |
|-------------|--------|--------|--------|--------|--------|--------|--------|--------|-------------|----------|----------|---------|-------------|---------|--------|
| 104745_at   | 979.4  | 756.2  | 654.1  | 887.5  | 502.9  | 735.5  | 641.6  | 714.2  | 0.107308565 | 819.3    | 648.55   | 170.75  | 1.263279624 | 0.1095  | -1.262 |
| 104746_at   | 1070.3 | 836.3  | 857.1  | 880.2  | 1201.3 | 1064.8 | 1074.2 | 929.8  | 0.089332628 | 910.975  | 1067.525 | 156.55  | 0.853352381 | 0.0837  | 1.173  |
| 104747_at   | 2.9    | 9      | 3.3    | 2.9    | 6.8    | 5.8    | 3.8    | 9.3    | 0.354165481 | 4.525    | 6.425    | 1.9     | 0.704280156 | 0.2521  | 1.522  |
| 104748_s_at | 17     | 4.4    | 15.1   | 6.7    | 19.8   | 10.6   | 6.9    | 3.8    | 0.913733285 | 10.8     | 10.275   | 0.525   | 1.051094891 | 0.8665  | -1.087 |
| 104749_at   | 295.8  | 301.6  | 322.6  | 255.4  | 207.2  | 328.5  | 252.9  | 306    | 0.542082204 | 293.85   | 273.65   | 20.2    | 1.073816919 | 0.4947  | -1.087 |
| 104750_at   | 43.3   | 6.1    | 26.7   | 33.9   | 11.9   | 33.6   | 30.2   | 27.9   | 0.869529579 | 27.5     | 25.9     | 1.6     | 1.061776062 | 0.8711  | -1.089 |
| 104751_at   | 8      | 8.8    | 7.1    | 18.3   | 20.7   | 33.2   | 12.2   | 8.4    | 0.250704492 | 10.55    | 18.625   | 8.075   | 0.566442953 | 0.2165  | 1.665  |
| 104752_at   | 725.5  | 755.4  | 872.3  | 740.1  | 995.4  | 854.5  | 988.1  | 633.5  | 0.358488296 | 773.325  | 867.875  | 94.55   | 0.89105574  | 0.4033  | -1.108 |
| 104754_at   | 462.8  | 672.7  | 613.7  | 601.2  | 533.4  | 642.2  | 657.1  | 617.4  | 0.653752244 | 587.6    | 612.525  | 24.925  | 0.959307783 | 0.6266  | -1.049 |
| 104755_at   | 475.6  | 634.7  | 517.5  | 625.7  | 667.9  | 588.8  | 634.9  | 722.8  | 0.117863631 | 563.375  | 653.6    | 90.225  | 0.861956854 | 0.1153  | 1.166  |
| 104756_at   | 685.1  | 735    | 627.6  | 617    | 870.9  | 666.6  | 828.4  | 603.3  | 0.33412054  | 666.175  | 742.3    | 76.125  | 0.897447124 | 0.3424  | 1.104  |
| 104757_at   | 171.7  | 137.8  | 217    | 205.3  | 111.3  | 156.7  | 132.2  | 142.3  | 0.071231145 | 182.95   | 135.625  | 47.325  | 1.348940092 | 0.05881 | -1.339 |
| 104758_at   | 455.9  | 326.4  | 440.2  | 373.9  | 317.6  | 406.8  | 435.2  | 364.2  | 0.662588326 | 399.1    | 380.95   | 18.15   | 1.047644048 | 0.6805  | -1.046 |
| 104759_at   | 409.1  | 342.3  | 397.6  | 413.5  | 279.5  | 447.3  | 412.3  | 369.2  | 0.749887972 | 390.625  | 377.075  | 13.55   | 1.035934496 | 0.6841  | -1.049 |
| 104760_at   | 676.2  | 695.1  | 670.6  | 630.1  | 499.7  | 645.5  | 576.3  | 616    | 0.070661964 | 668      | 584.375  | 83.625  | 1.143101604 | 0.05984 | -1.148 |
| 104761_at   | 592.8  | 530.7  | 471.9  | 598.3  | 465.6  | 630.5  | 626.9  | 621.1  | 0.482875283 | 548.425  | 586.025  | 37.6    | 0.935838915 | 0.5217  | -1.065 |
| 104762_r_at | 1157.6 | 1106.2 | 1258.3 | 929.6  | 1448.4 | 1032.8 | 1175.7 | 1240.9 | 0.353337041 | 1112.925 | 1224.45  | 111.525 | 0.90891829  | 0.3589  | 1.099  |
| 104763_at   | 406    | 410.7  | 453.8  | 257.1  | 511.6  | 601.3  | 451.6  | 519.8  | 0.042705046 | 381.9    | 521.075  | 139.175 | 0.732907931 | 0.05742 | 1.388  |
| 104766_at   | 1005.5 | 1672.3 | 1252   | 1380   | 1230.5 | 1429.2 | 1443.4 | 1290.5 | 0.894749976 | 1327.45  | 1348.4   | 20.95   | 0.984463067 | 0.7991  | -1.03  |
| 104767_f_at | 330.2  | 390.5  | 319.2  | 285    | 338.9  | 305.8  | 384.1  | 326.2  | 0.794436829 | 331.225  | 338.75   | 7.525   | 0.977785978 | 0.7646  | -1.026 |
| 160060_at   | 2      | 17     | 6.8    | 7.9    | 19.4   | 5.9    | 22.2   | 7.4    | 0.349146718 | 8.425    | 13.725   | 5.3     | 0.613843352 | 0.3374  | 1.777  |
| 160061_at   | 12.2   | 21.9   | 42.7   | 14.3   | 18.3   | 15.1   | 23.5   | 17.1   | 0.589333899 | 22.775   | 18.5     | 4.275   | 1.231081081 | 0.7516  | -1.103 |
| 160062_i_at | 9.3    | 9.9    | 10.3   | 12.4   | 5.9    | 9.1    | 8.2    | 14.7   | 0.642476904 | 10.475   | 9.475    | 1       | 1.105540897 | 0.4762  | -1.163 |
| 160063_i_at | 3      | 3.2    | 2.7    | 7.1    | 3.5    | 9.8    | 3.3    | 6.2    | 0.395480537 | 4        | 5.7      | 1.7     | 0.701754386 | 0.3594  | 1.397  |
| 160064_at   | 770.3  | 826    | 957.8  | 895    | 621.4  | 896.8  | 770.4  | 980.2  | 0.633374648 | 862.275  | 817.2    | 45.075  | 1.055157856 | 0.5785  | -1.067 |
| 160065_s_at | 2015.2 | 2635.3 | 2336   | 2366   | 1999.1 | 2322.2 | 1697.5 | 2331.4 | 0.252779884 | 2338.125 | 2087.55  | 250.575 | 1.120033053 | 0.2559  | -1.124 |
| 160066_at   | 277.4  | 313.2  | 345.9  | 347.1  | 345.8  | 316.4  | 313.2  | 388.9  | 0.434350773 | 320.9    | 341.075  | 20.175  | 0.940848787 | 0.4337  | -1.063 |
| 160067_at   | 383.6  | 348.2  | 428    | 338.6  | 291.1  | 388.3  | 406.3  | 316.8  | 0.513242059 | 374.6    | 350.625  | 23.975  | 1.068377897 | 0.4853  | -1.074 |
| 160068_at   | 161.9  | 193.6  | 147.7  | 134.2  | 178.6  | 179.5  | 162.6  | 162.8  | 0.446335783 | 159.35   | 170.875  | 11.525  | 0.932553036 | 0.3843  | -1.081 |
| 160069_at   | 805.5  | 617.4  | 720.1  | 768.5  | 520    | 549.2  | 627.6  | 482.5  | 0.013111263 | 727.875  | 544.825  | 183.05  | 1.335979443 | 0.01126 | -1.336 |
| 160070_at   | 61.2   | 47.5   | 70.8   | 55.6   | 78     | 63.7   | 48.7   | 59.4   | 0.654746904 | 58.775   | 62.45    | 3.675   | 0.941152922 | 0.6718  | -1.059 |
| 160071_at   | 753.7  | 643.7  | 688.7  | 696.1  | 649.5  | 564.9  | 641.8  | 546.9  | 0.034523245 | 695.55   | 600.775  | 94.775  | 1.157754567 | 0.03481 | -1.159 |
| 160072_at   | 369.6  | 340.7  | 356    | 350.1  | 475.3  | 328.7  | 354.6  | 352.5  | 0.528702437 | 354.1    | 377.775  | 23.675  | 0.937330422 | 0.5379  | -1.056 |
| 160073_i_at | 147.1  | 115.9  | 169.2  | 237.1  | 170.6  | 131.5  | 173    | 263.3  | 0.664958589 | 167.325  | 184.6    | 17.275  | 0.906419285 | 0.6453  | -1.106 |
| 160074_at   | 189.2  | 106.2  | 129.6  | 160.2  | 146.4  | 260.6  | 203.1  | 179.2  | 0.144938536 | 146.3    | 197.325  | 51.025  | 0.741416445 | 0.1349  | 1.351  |
| 160075_at   | 336.2  | 476.5  | 403    | 415.7  | 320.3  | 474.8  | 493.4  | 341.8  | 0.996058823 | 407.85   | 407.575  | 0.275   | 1.000674722 | 0.9342  | -1.011 |
| 160076_at   | 1995.7 | 1380.9 | 1747.6 | 1608.2 | 1200.5 | 1577.6 | 1380.5 | 1151.7 | 0.072814268 | 1683.1   | 1327.575 | 355.525 | 1.267800313 | 0.0658  | -1.266 |
| 160077_at   | 75.1   | 42.4   | 35.1   | 32.9   | 211.9  | 21     | 126.9  | 59.5   | 0.258818962 | 46.375   | 104.825  | 58.45   | 0.442404007 | 0.3417  | 1.739  |
| 160078_at   | 1530.7 | 2339.6 | 1720.2 | 1806   | 3345   | 2050.8 | 2254.3 | 2085.8 | 0.161185676 | 1849.125 | 2433.975 | 584.85  | 0.759714048 | 0.1175  | 1.305  |
| 160079_i_at | 378.2  | 573.3  | 363.6  | 497.3  | 472.7  | 410.5  | 496    | 327.8  | 0.68943718  | 453.1    | 426.75   | 26.35   | 1.061745753 | 0.7187  | -1.056 |
| 160080_r_at | 10.1   | 11     | 11.1   | 13.8   | 13.1   | 12.4   | 13.2   | 13.4   | 0.150822759 | 11.5     | 13.025   | 1.525   | 0.882917466 | 0.1039  | 1.139  |
| 160081_at   | 1311.5 | 980.4  | 1046.7 | 1370.5 | 1311.2 | 1077.8 | 1271.3 | 1240.3 | 0.680540783 | 1177.275 | 1225.15  | 47.875  | 0.960923152 | 0.6301  | -1.048 |
| 160082_s_at | 4090.2 | 3102.5 | 3769.9 | 3080.7 | 2405.3 | 3990.2 | 3114.5 | 2918.2 | 0.370295027 | 3510.825 | 3107.05  | 403.775 | 1.129954458 | 0.3392  | -1.14  |
| 160083_at   | 221.9  | 189.4  | 218.6  | 379.3  | 346.9  | 339.5  | 259    | 370.9  | 0.183678692 | 252.3    | 329.075  | 76.775  | 0.766694523 | 0.1379  | 1.342  |
| 160084_at   | 581.3  | 619.8  | 674.3  | 560.1  | 487.3  | 736.9  | 768.2  | 669.7  | 0.450412954 | 608.875  | 665.525  | 56.65   | 0.914879231 | 0.5157  | -1.079 |
| 160085_at   | 1586.3 | 1535.9 | 1727.2 | 1375.9 | 2125   | 1685.8 | 1896.5 | 1634.4 | 0.089072625 | 1556.325 | 1835.425 | 279.1   | 0.847937126 | 0.07639 | 1.177  |
| 160086_at   | 7.6    | 11.1   | 7.7    | 8.3    | 6.7    | 5.5    | 7.5    | 5.7    | 0.059971057 | 8.675    | 6.35     | 2.325   | 1.366141732 | 0.03803 | -1.357 |
| 160087_at   | 70.5   | 63.9   | 85.3   | 90.1   | 123    | 74.1   | 92.9   | 72.6   | 0.369113024 | 77.45    | 90.65    | 13.2    | 0.854384997 | 0.3658  | 1.155  |
| 160088_at   | 6.4    | 14.8   | 8.1    | 19     | 8      | 27.5   | 5      | 11.8   | 0.870141485 | 12.075   | 13.075   | 1       | 0.923518164 | 0.952   | -1.028 |
| 160089_at   | 4445.7 | 4977.9 | 5664.3 | 4734.6 | 6013.5 | 5256.4 | 6545.8 | 5971.2 | 0.036982892 | 4955.625 | 5946.725 | 991.1   | 0.833336837 | 0.03666 | 1.201  |
| 160090_f_at | 8527.3 | 6510.1 | 7328.9 | 6972.6 | 7324.8 | 7536   | 7098.2 | 6805.6 | 0.770908382 | 7334.725 | 7191.15  | 143.575 | 1.019965513 | 0.8089  | -1.016 |
| 160091_at   | 4067.8 | 4141.4 | 4358.3 | 3900.3 | 4240.4 | 3522   | 4188.3 | 3796.2 | 0.399891407 | 4116.95  | 3936.725 | 180.225 | 1.045780439 | 0.3801  | -1.048 |
| 160092_at   | 504.8  | 746.2  | 579.4  | 775.2  | 339.4  | 696.6  | 469.2  | 656.7  | 0.337152343 | 651.4    | 540.475  | 110.925 | 1.205236135 | 0.3228  | -1.235 |
| 160093_r_at | 145.6  | 138    | 177    | 75.5   | 100.3  | 285.1  | 227.2  | 82.6   | 0.497887863 | 134.025  | 173.8    | 39.775  | 0.771144994 | 0.6429  | 1.189  |
| 160094_at   | 1320.1 | 1614.8 | 1338.9 | 1453.6 | 1364.6 | 1459.9 | 1518.3 | 1522.8 | 0.674285535 | 1431.85  | 1466.4   | 34.55   | 0.976438898 | 0.6391  | -1.026 |
| 160095_at   | 865    | 949.5  | 918    | 1054.9 | 867.3  | 1038.6 | 955.5  | 1295.5 | 0.409420519 | 946.85   | 1039.225 | 92.375  | 0.911111646 | 0.4091  | -1.088 |



|             |        |        |        |        |        |        |        |        |             |          |          |         |             |          |        |
|-------------|--------|--------|--------|--------|--------|--------|--------|--------|-------------|----------|----------|---------|-------------|----------|--------|
| 160096_at   | 731.2  | 737.3  | 771.2  | 812.3  | 748.8  | 702.8  | 841.1  | 804.3  | 0.765464909 | 763      | 774.25   | 11.25   | 0.985469809 | 0.7862   | -1.013 |
| 160097_at   | 24.6   | 25.1   | 27.5   | 23.1   | 33.3   | 23.4   | 21.5   | 25.1   | 0.799749416 | 25.075   | 25.825   | 0.75    | 0.970958374 | 0.8615   | -1.019 |
| 160098_s_at | 569.5  | 748.4  | 721.2  | 682.8  | 578.2  | 663.5  | 569.9  | 627.6  | 0.181343957 | 680.475  | 609.8    | 70.675  | 1.115898655 | 0.1815   | -1.112 |
| 160099_at   | 147.2  | 222.9  | 199.8  | 268.2  | 210.6  | 297.7  | 274.4  | 402.8  | 0.12468883  | 209.525  | 296.375  | 86.85   | 0.706959089 | 0.1108   | 1.409  |
| 160100_at   | 494.6  | 711.6  | 635.3  | 819.8  | 722.1  | 606.9  | 767.8  | 566.6  | 0.995190549 | 665.325  | 665.85   | 0.525   | 0.999211534 | 0.9418   | -1.01  |
| 160101_at   | 2894.4 | 2922.4 | 3670   | 2898.6 | 3231   | 3529.1 | 3351.9 | 2516.7 | 0.842629286 | 3096.35  | 3157.175 | 60.825  | 0.980734359 | 0.8669   | -1.017 |
| 160102_at   | 2416.3 | 1630.3 | 1880.3 | 2515.5 | 1339.4 | 2350.4 | 1829.1 | 1915.7 | 0.428443086 | 2110.6   | 1858.65  | 251.95  | 1.135555376 | 0.4316   | -1.14  |
| 160103_at   | 1426.2 | 1596.2 | 1571.7 | 1508.1 | 1937.6 | 1667.2 | 1754.2 | 1827.9 | 0.010055613 | 1525.55  | 1796.725 | 271.175 | 0.849072618 | 0.00698  | 1.177  |
| 160104_at   | 229.9  | 312.2  | 362.6  | 372.1  | 181.1  | 331.2  | 380    | 374.5  | 0.96645573  | 319.2    | 316.7    | 2.5     | 1.007893906 | 0.8838   | -1.032 |
| 160105_r_at | 165.9  | 124.8  | 267.3  | 186.8  | 219.1  | 264.6  | 236.6  | 113.4  | 0.636041735 | 186.2    | 208.425  | 22.225  | 0.893366919 | 0.694    | 1.108  |
| 160106_at   | 478.2  | 412.5  | 460.9  | 379    | 405.9  | 309.9  | 319.8  | 403.6  | 0.080144976 | 432.65   | 359.8    | 72.85   | 1.202473596 | 0.08167  | -1.207 |
| 160107_at   | 2599.4 | 1976.6 | 2392.2 | 2057.5 | 1914.1 | 2234   | 1930.7 | 1707.5 | 0.142573794 | 2256.425 | 1946.575 | 309.85  | 1.159177016 | 0.1346   | -1.157 |
| 160108_at   | 231.1  | 179.8  | 241.7  | 149.8  | 329.3  | 262.2  | 456.9  | 247.3  | 0.075587438 | 200.6    | 323.925  | 123.325 | 0.619279154 | 0.03973  | 1.596  |
| 160109_at   | 744.3  | 1548.3 | 1161.2 | 1275.2 | 1573.1 | 1377.7 | 1420.3 | 1111.1 | 0.375288048 | 1182.25  | 1370.55  | 188.3   | 0.862609901 | 0.3496   | 1.19   |
| 160110_at   | 644.2  | 645.4  | 667.3  | 770.4  | 790.3  | 641.5  | 657.1  | 684.9  | 0.804775092 | 681.825  | 693.45   | 11.625  | 0.983235994 | 0.8046   | -1.016 |
| 160111_at   | 576.7  | 512.8  | 572.1  | 676.9  | 445.2  | 575.5  | 546    | 563.9  | 0.294817953 | 584.625  | 532.65   | 51.975  | 1.097578147 | 0.3      | -1.098 |
| 160112_at   | 174.4  | 193.9  | 170.4  | 229.1  | 146.4  | 214.1  | 222.1  | 214.8  | 0.751439196 | 191.95   | 199.35   | 7.4     | 0.962879358 | 0.8026   | -1.032 |
| 160113_at   | 496.8  | 547.4  | 587.4  | 576.3  | 482.1  | 564.6  | 566.9  | 679.1  | 0.661440479 | 551.975  | 573.175  | 21.2    | 0.963013041 | 0.6976   | -1.033 |
| 160114_at   | 3178.7 | 3584.2 | 3585.1 | 3255.5 | 4432.2 | 3421.1 | 3911.4 | 3485.2 | 0.180838523 | 3400.875 | 3812.475 | 411.6   | 0.892038636 | 0.1544   | 1.117  |
| 160115_at   | 436.9  | 504.9  | 456.3  | 513.4  | 646.2  | 400.4  | 454.4  | 532    | 0.621210935 | 477.875  | 508.25   | 30.375  | 0.940236104 | 0.6804   | -1.049 |
| 160116_at   | 10.2   | 7.9    | 26.8   | 35.2   | 12.4   | 32.7   | 17.8   | 11.5   | 0.868299138 | 20.025   | 18.6     | 1.425   | 1.076612903 | 0.9622   | -1.022 |
| 160117_at   | 737.1  | 956.9  | 962.9  | 896    | 1021.8 | 1647.6 | 1529.8 | 884.3  | 0.131169935 | 888.225  | 1270.875 | 382.65  | 0.698908233 | 0.09106  | 1.391  |
| 160118_at   | 1027   | 1996.6 | 1695.1 | 1791.1 | 1936.5 | 1914.8 | 2084.5 | 2120.5 | 0.161496449 | 1627.45  | 2014.075 | 386.625 | 0.80803843  | 0.1572   | 1.274  |
| 160119_at   | 577.6  | 513.5  | 604    | 567.4  | 686.8  | 560.1  | 630.6  | 722.1  | 0.094730501 | 565.625  | 649.9    | 84.275  | 0.870326204 | 0.08245  | 1.146  |
| 160120_i_at | 699.7  | 514.3  | 730.3  | 562.7  | 1039.7 | 622.7  | 822.3  | 1039   | 0.079893676 | 626.75   | 880.925  | 254.175 | 0.711468059 | 0.06776  | 1.391  |
| 160121_at   | 461    | 360.5  | 320    | 379.4  | 360.1  | 375.5  | 480.7  | 298.2  | 0.974612252 | 380.225  | 378.625  | 1.6     | 1.004225817 | 0.9386   | -1.01  |
| 160122_at   | 60.9   | 52.8   | 45.3   | 48.9   | 60.7   | 53.4   | 42.3   | 58.7   | 0.746653537 | 51.975   | 53.775   | 1.8     | 0.966527197 | 0.7777   | -1.031 |
| 160123_at   | 2854.6 | 2834   | 2943.9 | 2977.5 | 3410.5 | 2350.9 | 2960.8 | 3517.3 | 0.596479849 | 2902.5   | 3059.875 | 157.375 | 0.94856816  | 0.6747   | -1.042 |
| 160124_r_at | 672.6  | 704.1  | 665.7  | 719.5  | 603.6  | 714.3  | 567.6  | 900.7  | 0.941025835 | 690.475  | 696.55   | 6.075   | 0.991278444 | 0.9475   | -1.007 |
| 160125_at   | 410.9  | 387.1  | 459.5  | 389.7  | 404.7  | 399.1  | 430.4  | 382.3  | 0.710591497 | 411.8    | 404.125  | 7.675   | 1.018991649 | 0.7231   | -1.017 |
| 160126_at   | 865.3  | 616.9  | 689    | 724.3  | 707.2  | 635.1  | 725.6  | 602    | 0.391540777 | 723.875  | 667.475  | 56.4    | 1.084497547 | 0.3933   | -1.079 |
| 160127_at   | 378.2  | 282.9  | 296    | 389.4  | 309.2  | 320.6  | 295.1  | 368.3  | 0.692581712 | 336.625  | 323.3    | 13.325  | 1.041215589 | 0.7343   | -1.034 |
| 160128_at   | 418.3  | 486.9  | 504.1  | 432.6  | 506.1  | 572.1  | 636.2  | 523.5  | 0.036185998 | 460.475  | 559.475  | 99      | 0.823048394 | 0.02951  | 1.214  |
| 160129_at   | 2725.7 | 2067.7 | 2364.5 | 1648.2 | 2873.1 | 2318.1 | 2550.5 | 1963.1 | 0.480441195 | 2201.525 | 2426.2   | 224.675 | 0.90739634  | 0.4651   | 1.11   |
| 160130_at   | 294.7  | 396.4  | 322    | 462.1  | 276.2  | 361.9  | 327.8  | 427.7  | 0.694262664 | 368.8    | 348.4    | 20.4    | 1.058553387 | 0.707    | -1.055 |
| 160131_at   | 413    | 578.9  | 438.5  | 617.2  | 360.1  | 518.2  | 395.3  | 500.4  | 0.327504752 | 511.9    | 443.5    | 68.4    | 1.154227734 | 0.334    | -1.151 |
| 160132_at   | 97.1   | 40.7   | 42.6   | 92.7   | 57.1   | 102.5  | 42.1   | 161.7  | 0.500331505 | 68.275   | 90.85    | 22.575  | 0.751513484 | 0.5641   | 1.264  |
| 160133_at   | 147.9  | 171    | 234.4  | 82.1   | 63.4   | 132    | 87.2   | 198    | 0.404754507 | 158.85   | 120.15   | 38.7    | 1.322097378 | 0.3946   | -1.355 |
| 160134_at   | 173    | 254.6  | 249.8  | 227.8  | 211.5  | 280.9  | 267.5  | 233.9  | 0.401302409 | 226.3    | 248.45   | 22.15   | 0.910847253 | 0.4048   | -1.104 |
| 160135_at   | 543.1  | 437    | 507.2  | 483.9  | 576.8  | 540.9  | 511.5  | 454.5  | 0.441705387 | 492.8    | 520.925  | 28.125  | 0.946009502 | 0.4515   | -1.056 |
| 160136_r_at | 571.3  | 228.2  | 314.9  | 395.7  | 332.2  | 327.3  | 240.6  | 302.8  | 0.377326364 | 377.525  | 300.725  | 76.8    | 1.255382825 | 0.4191   | -1.197 |
| 160137_at   | 397.8  | 354.5  | 466.4  | 376.1  | 264.1  | 401.8  | 381.8  | 324.3  | 0.209490366 | 398.7    | 343      | 55.7    | 1.162390671 | 0.2057   | -1.171 |
| 160138_at   | 756.3  | 720.8  | 779.5  | 930.2  | 455.5  | 780.9  | 604    | 654.2  | 0.084105626 | 796.7    | 623.65   | 173.05  | 1.277479355 | 0.08471  | -1.295 |
| 160139_at   | 636.1  | 717    | 687.9  | 552.7  | 931.5  | 1226.2 | 1176.2 | 967.2  | 0.005155334 | 648.425  | 1075.275 | 426.85  | 0.603031783 | 0.001357 | 1.654  |
| 160140_at   | 262.8  | 271.9  | 279.1  | 349.8  | 252.4  | 313.1  | 276.8  | 316.2  | 0.961258985 | 290.9    | 289.625  | 1.275   | 1.004402244 | 0.9802   | -1.002 |
| 160141_r_at | 97.3   | 105.9  | 104.6  | 121.5  | 101.2  | 120.8  | 100.7  | 127.4  | 0.565257684 | 107.325  | 112.525  | 5.2     | 0.953788047 | 0.5742   | -1.046 |
| 160142_at   | 167.4  | 210.1  | 159.6  | 199.7  | 282.3  | 209.2  | 259.9  | 209.1  | 0.050922316 | 184.2    | 240.125  | 55.925  | 0.767100469 | 0.04117  | 1.301  |
| 160143_r_at | 7.8    | 0.8    | 1.4    | 1.5    | 1.5    | 7.8    | 1.2    | 3.9    | 0.757854058 | 2.875    | 3.6      | 0.725   | 0.798611111 | 0.5887   | 1.458  |
| 160144_at   | 1630.5 | 1200   | 1611.1 | 1537.3 | 1263.4 | 1453.2 | 1373.6 | 1605.7 | 0.589413972 | 1494.725 | 1423.975 | 70.75   | 1.049684861 | 0.627    | -1.046 |
| 160145_at   | 471.6  | 460.3  | 513    | 452.6  | 614.4  | 415.7  | 651.5  | 341    | 0.709045734 | 474.375  | 505.65   | 31.275  | 0.938148917 | 0.858    | -1.03  |
| 160146_r_at | 188.3  | 222.9  | 270.4  | 228.9  | 311.7  | 210.1  | 237.5  | 219.2  | 0.57538764  | 227.625  | 244.625  | 17      | 0.930505876 | 0.5776   | -1.07  |
| 160147_r_at | 19     | 23.8   | 32.1   | 31.1   | 30.7   | 60.5   | 35     | 38.5   | 0.111537199 | 26.5     | 41.175   | 14.675  | 0.643594414 | 0.06842  | 1.534  |
| 160148_at   | 15.5   | 11.6   | 15.9   | 15.1   | 28.3   | 82.2   | 43.8   | 11.7   | 0.171201363 | 14.525   | 41.5     | 26.975  | 0.35        | 0.09258  | 2.296  |
| 160149_at   | 693.9  | 748    | 757    | 1433.2 | 602.6  | 773.9  | 758.4  | 796.2  | 0.397189616 | 908.025  | 732.775  | 175.25  | 1.23915936  | 0.3745   | -1.189 |
| 160150_f_at | 6102.6 | 5333.2 | 5935.1 | 5669.7 | 5382.2 | 5453   | 5593.8 | 4933.7 | 0.106841834 | 5760.15  | 5340.675 | 419.475 | 1.078543443 | 0.109    | -1.078 |
| 160151_i_at | 230.9  | 204.1  | 213.7  | 210.5  | 134.1  | 213.6  | 181.4  | 196    | 0.142162643 | 214.8    | 181.275  | 33.525  | 1.184940008 | 0.1302   | -1.201 |



|             |        |        |        |        |        |        |        |        |             |          |          |          |             |          |        |
|-------------|--------|--------|--------|--------|--------|--------|--------|--------|-------------|----------|----------|----------|-------------|----------|--------|
| 160152_at   | 1786   | 1437.5 | 1607   | 1592.1 | 1686.3 | 1541.3 | 1516.3 | 1414.4 | 0.49522756  | 1605.65  | 1539.575 | 66.075   | 1.042917688 | 0.4998   | -1.042 |
| 160153_at   | 2397.6 | 1663.4 | 1979.7 | 2356.1 | 1408.5 | 1911.7 | 1827.1 | 2389.8 | 0.449611942 | 2099.2   | 1884.275 | 214.925  | 1.114062438 | 0.4382   | -1.122 |
| 160154_at   | 10.6   | 7.9    | 10.3   | 9.9    | 6.3    | 11.3   | 9.7    | 7.9    | 0.514959199 | 9.675    | 8.8      | 0.875    | 1.099431818 | 0.4755   | -1.115 |
| 160155_at   | 12.2   | 10.3   | 7.4    | 12     | 16.3   | 9.3    | 8.3    | 10.7   | 0.76114235  | 10.475   | 11.15    | 0.675    | 0.939461883 | 0.7989   | -1.051 |
| 160156_at   | 658.6  | 603.9  | 621.8  | 710    | 370.4  | 559.5  | 485.3  | 452.8  | 0.010987977 | 648.575  | 467      | 181.575  | 1.388811563 | 0.01095  | -1.401 |
| 160157_at   | 87     | 85     | 69     | 61.9   | 162.3  | 83.9   | 67     | 75.1   | 0.410582647 | 75.725   | 97.075   | 21.35    | 0.780066959 | 0.4022   | 1.213  |
| 160158_at   | 3351.5 | 2836.5 | 2233.1 | 2483.7 | 2552.9 | 2840   | 1765.3 | 3784.4 | 0.985151251 | 2726.2   | 2735.65  | 9.45     | 0.996545611 | 0.9101   | -1.021 |
| 160159_at   | 1603.4 | 1021.2 | 1174.2 | 1333.2 | 582.8  | 1109.9 | 775.4  | 901.1  | 0.038633904 | 1283     | 842.3    | 440.7    | 1.523210258 | 0.03991  | -1.543 |
| 160160_at   | 107.7  | 115.3  | 138.6  | 163.6  | 136.8  | 122.7  | 142.5  | 93.7   | 0.674041431 | 131.3    | 123.925  | 7.375    | 1.059511801 | 0.6838   | -1.059 |
| 160161_at   | 699.2  | 700.3  | 784.9  | 546.2  | 1018.3 | 672.4  | 827.1  | 604.4  | 0.395269739 | 682.65   | 780.55   | 97.9     | 0.87457562  | 0.4113   | 1.13   |
| 160162_at   | 2078.1 | 2301.8 | 2365.3 | 2063.1 | 1805   | 2411.6 | 2027.5 | 2263.2 | 0.646474176 | 2202.075 | 2126.825 | 75.25    | 1.035381378 | 0.6111   | -1.04  |
| 160163_at   | 793.1  | 879.2  | 867.5  | 885.7  | 987.7  | 988.9  | 885.7  | 846    | 0.155699354 | 856.375  | 927.075  | 70.7     | 0.92373864  | 0.1482   | -1.081 |
| 160164_at   | 1052.7 | 1714.7 | 1368.3 | 1721.3 | 1371.9 | 1596.3 | 1694.7 | 1500.1 | 0.682911252 | 1464.25  | 1540.75  | 76.5     | 0.950348856 | 0.6093   | -1.07  |
| 160165_at   | 501.5  | 597.6  | 574.5  | 538.2  | 545.3  | 546.6  | 546.5  | 549    | 0.791046814 | 552.95   | 546.85   | 6.1      | 1.011154796 | 0.8244   | -1.009 |
| 160166_r_at | 317.4  | 235.1  | 285.3  | 285.5  | 209.8  | 361.2  | 308.5  | 276.6  | 0.829260517 | 280.825  | 289.025  | 8.2      | 0.971628752 | 0.9101   | -1.015 |
| 160167_at   | 1080.2 | 1150.5 | 1348   | 1114.2 | 1253.1 | 1078.5 | 1195.6 | 1251.8 | 0.77833898  | 1173.225 | 1194.75  | 21.525   | 0.981983679 | 0.752    | -1.02  |
| 160168_at   | 789.4  | 685.8  | 736.3  | 702.1  | 554.8  | 631.6  | 678    | 641.1  | 0.025955375 | 728.4    | 626.375  | 102.025  | 1.16288166  | 0.0275   | -1.164 |
| 160169_at   | 542    | 412.4  | 467.3  | 507.8  | 254.3  | 469.1  | 362.4  | 476.8  | 0.188365046 | 482.375  | 390.65   | 91.725   | 1.234800973 | 0.1864   | -1.267 |
| 160170_at   | 19.2   | 30.6   | 6.1    | 21.8   | 32     | 26.3   | 8.4    | 38.5   | 0.436478251 | 19.425   | 26.3     | 6.875    | 0.738593156 | 0.5442   | 1.37   |
| 160171_f_at | 903.9  | 957    | 934.8  | 884.8  | 728.2  | 815.5  | 845.5  | 705.7  | 0.014952885 | 920.125  | 773.725  | 146.4    | 1.189214514 | 0.009571 | -1.192 |
| 160172_at   | 381.5  | 1529   | 1761.4 | 1369.9 | 1965.9 | 3006.5 | 2187.9 | 2222.6 | 0.031393617 | 1260.45  | 2345.725 | 1085.275 | 0.537339202 | 0.08439  | 2.126  |
| 160173_at   | 673.9  | 2442.1 | 1794.3 | 1865.8 | 3736.6 | 3333.2 | 2575.5 | 3162.3 | 0.017985411 | 1694.025 | 3201.9   | 1507.875 | 0.529068678 | 0.04733  | 2.071  |
| 160174_at   | 498.8  | 519    | 510.5  | 572.9  | 587.9  | 535.1  | 589    | 685.5  | 0.096237521 | 525.3    | 599.375  | 74.075   | 0.87641293  | 0.0734   | 1.138  |
| 160175_at   | 143.1  | 60.7   | 61.8   | 129.1  | 87.8   | 100.2  | 89.3   | 71.1   | 0.639652359 | 98.675   | 87.1     | 11.575   | 1.132893226 | 0.8321   | -1.055 |
| 160176_at   | 635.1  | 568.4  | 602    | 555.2  | 640.1  | 496.8  | 557.2  | 537.1  | 0.399537995 | 590.175  | 557.8    | 32.375   | 1.058040516 | 0.3675   | -1.061 |
| 160177_at   | 1957.2 | 1291.5 | 1579.2 | 1908.3 | 1255.7 | 1442.6 | 1509   | 1274   | 0.135439749 | 1684.05  | 1370.325 | 313.725  | 1.228942039 | 0.1166   | -1.216 |
| 160178_r_at | 37.1   | 40.5   | 42.3   | 42.2   | 55.7   | 32.3   | 50.5   | 44.9   | 0.371638526 | 40.525   | 45.85    | 5.325    | 0.883860414 | 0.4221   | 1.111  |
| 160179_at   | 91.3   | 105.4  | 102    | 153.6  | 94.3   | 115.9  | 146    | 123.8  | 0.706506462 | 113.075  | 120      | 6.925    | 0.942291667 | 0.6586   | -1.07  |
| 160180_at   | 258.3  | 179.5  | 230.1  | 249.5  | 200.3  | 306.8  | 201.5  | 281.8  | 0.599416656 | 229.35   | 247.6    | 18.25    | 0.926292407 | 0.6422   | -1.07  |
| 160181_at   | 6.6    | 3.3    | 33     | 30.6   | 29.2   | 10.9   | 57.1   | 6.2    | 0.613283459 | 18.375   | 25.85    | 7.475    | 0.710831721 | 0.6111   | 1.499  |
| 160182_at   | 1220.8 | 2737.5 | 1846.8 | 2312.2 | 2617.9 | 1608.3 | 1883.5 | 2192.8 | 0.910086906 | 2029.325 | 2075.625 | 46.3     | 0.977693466 | 0.8163   | -1.051 |
| 160183_f_at | 1475.5 | 1992.9 | 1750.7 | 1483.3 | 2469   | 1757.5 | 1837.5 | 1428.3 | 0.467384084 | 1675.6   | 1873.075 | 197.475  | 0.89457176  | 0.4841   | -1.105 |
| 160184_at   | 542.7  | 730.1  | 508.5  | 759.7  | 425    | 700.3  | 509.3  | 757.4  | 0.725819051 | 635.25   | 598      | 37.25    | 1.06229097  | 0.6864   | -1.075 |
| 160185_at   | 8.4    | 7.9    | 11.5   | 14.6   | 13.5   | 4      | 14.7   | 10.5   | 0.980020094 | 10.6     | 10.675   | 0.075    | 0.992974239 | 0.8283   | -1.078 |
| 160186_at   | 334.4  | 237.9  | 300.1  | 252.5  | 210.3  | 232.8  | 216.6  | 196.4  | 0.049985121 | 281.225  | 214.025  | 67.2     | 1.313982011 | 0.02127  | -1.304 |
| 160187_at   | 957.6  | 811.9  | 931.8  | 812.7  | 763.5  | 809.4  | 841.2  | 966.5  | 0.587290926 | 878.5    | 845.15   | 33.35    | 1.039460451 | 0.5737   | -1.04  |
| 160188_at   | 3031.7 | 4015.6 | 3625.8 | 4247   | 2224.2 | 3294.9 | 2601.8 | 2922.2 | 0.033307327 | 3730.025 | 2760.775 | 969.25   | 1.351078954 | 0.03503  | -1.354 |
| 160189_at   | 959    | 1311.6 | 1260.2 | 1189.3 | 714.1  | 1012.1 | 610.2  | 738.9  | 0.012246861 | 1180.025 | 768.825  | 411.2    | 1.534842129 | 0.01349  | -1.551 |
| 160190_at   | 1.6    | 4      | 9.6    | 1.4    | 10.4   | 1.7    | 11.6   | 16.9   | 0.165046861 | 4.15     | 10.15    | 6        | 0.408866995 | 0.2243   | 2.499  |
| 160191_at   | 594.6  | 773.9  | 706.4  | 933.5  | 544.5  | 705.4  | 548.7  | 791.3  | 0.306387262 | 752.1    | 647.475  | 104.625  | 1.161589251 | 0.3014   | -1.161 |
| 160192_at   | 2143.5 | 1589.3 | 1698.2 | 1899.3 | 1839.3 | 1503.3 | 1802.8 | 1791.3 | 0.525738297 | 1832.575 | 1734.175 | 98.4     | 1.056741678 | 0.5439   | -1.053 |
| 160193_at   | 719.1  | 564    | 685.5  | 679.7  | 554.9  | 618.2  | 600.9  | 584.8  | 0.119027115 | 662.075  | 589.7    | 72.375   | 1.122731898 | 0.102    | -1.119 |
| 160194_at   | 1639.8 | 1856.6 | 1708.7 | 1613.8 | 2445   | 1496.5 | 2048.7 | 1710.3 | 0.370990931 | 1704.725 | 1925.125 | 220.4    | 0.885513928 | 0.379    | -1.112 |
| 160195_at   | 650    | 908    | 697.3  | 866.6  | 849.6  | 869.8  | 931.3  | 957.8  | 0.148692028 | 780.475  | 902.125  | 121.65   | 0.865151725 | 0.1253   | 1.166  |
| 160196_at   | 495.6  | 591.1  | 485.9  | 514.4  | 520.3  | 601    | 502.2  | 430.3  | 0.852143572 | 521.75   | 513.45   | 8.3      | 1.016165157 | 0.8138   | -1.02  |
| 160197_at   | 483    | 616.5  | 508.4  | 529.3  | 642.6  | 407.6  | 581.7  | 606.5  | 0.690436174 | 534.3    | 559.6    | 25.3     | 0.954789135 | 0.7681   | -1.036 |
| 160198_at   | 1769.9 | 1484.9 | 1436.5 | 1778.9 | 1776.2 | 1622   | 1588.9 | 1722.9 | 0.582530467 | 1617.55  | 1677.5   | 59.95    | 0.964262295 | 0.5428   | -1.041 |
| 160199_at   | 354.9  | 372.7  | 565.9  | 441.3  | 474.6  | 469.1  | 486    | 355.6  | 0.832482151 | 433.7    | 446.325  | 12.625   | 0.971713438 | 0.7769   | -1.039 |
| 160200_at   | 658.6  | 538.4  | 620.8  | 558.2  | 471.9  | 660.2  | 493    | 749.7  | 0.996894459 | 594      | 593.7    | 0.3      | 1.000505306 | 0.8981   | -1.016 |
| 160201_r_at | 42.8   | 42.9   | 40.6   | 68.4   | 13.4   | 47.2   | 30.2   | 30.1   | 0.101539869 | 48.675   | 30.225   | 18.45    | 1.610421836 | 0.1077   | -1.726 |
| 160202_at   | 537    | 396.3  | 488.2  | 531.4  | 388.3  | 497.8  | 431.6  | 423.8  | 0.23717954  | 488.225  | 435.375  | 52.85    | 1.121389607 | 0.2488   | -1.118 |
| 160203_at   | 1610.4 | 1420.8 | 1618.3 | 1557.6 | 1205.3 | 1285   | 1301.8 | 1608.1 | 0.105219916 | 1551.775 | 1350.05  | 201.725  | 1.149420392 | 0.08377  | -1.155 |
| 160204_at   | 652.6  | 990    | 1009.5 | 916.8  | 855    | 741.7  | 770.2  | 733.8  | 0.254992471 | 892.225  | 775.175  | 117.05   | 1.150998162 | 0.2783   | -1.137 |
| 160205_f_at | 951.5  | 1302.6 | 1069.1 | 1220.2 | 1165.7 | 1163   | 971.7  | 1113.2 | 0.735014059 | 1135.85  | 1103.4   | 32.45    | 1.029409099 | 0.7763   | -1.025 |
| 160206_at   | 62.2   | 185.9  | 129.3  | 197.4  | 52.3   | 170.5  | 114.8  | 88.5   | 0.38713858  | 143.7    | 106.525  | 37.175   | 1.348979113 | 0.4475   | -1.343 |
| 160207_at   | 2213.7 | 3520.6 | 2558.1 | 4185.3 | 3514.2 | 3438   | 5825   | 4255.8 | 0.163762187 | 3119.425 | 4258.25  | 1138.825 | 0.732560324 | 0.1435   | 1.376  |



|             |        |        |        |        |        |        |        |        |             |          |          |         |             |          |        |
|-------------|--------|--------|--------|--------|--------|--------|--------|--------|-------------|----------|----------|---------|-------------|----------|--------|
| 160208_at   | 1319.7 | 1170   | 1544.5 | 1398.8 | 1052.1 | 1215.9 | 1314.4 | 1673.3 | 0.783808037 | 1358.25  | 1313.925 | 44.325  | 1.033734802 | 0.7195   | -1.043 |
| 160209_at   | 472.9  | 815    | 699.1  | 815.2  | 738.6  | 668.3  | 843.4  | 744.3  | 0.614005488 | 700.55   | 748.65   | 48.1    | 0.935751018 | 0.5537   | -1.09  |
| 160210_at   | 262.9  | 264.8  | 321.5  | 270.7  | 293.5  | 258.4  | 276.2  | 303.6  | 0.869457382 | 279.975  | 282.925  | 2.95    | 0.989573208 | 0.8454   | -1.012 |
| 160211_at   | 910.7  | 930.5  | 1073.6 | 1038.9 | 979.3  | 1004.8 | 1125.6 | 1034.1 | 0.390524426 | 988.425  | 1035.95  | 47.525  | 0.954124234 | 0.379    | -1.049 |
| 160212_at   | 276.4  | 238.7  | 239.5  | 319.6  | 221.5  | 262.5  | 217.5  | 321.1  | 0.690263864 | 268.55   | 255.65   | 12.9    | 1.050459613 | 0.6498   | -1.056 |
| 160213_at   | 129.7  | 164.3  | 154.7  | 137.7  | 168.7  | 133.1  | 97.1   | 159.3  | 0.711540681 | 146.6    | 139.55   | 7.05    | 1.050519527 | 0.6381   | -1.069 |
| 160214_at   | 352.6  | 284.4  | 268.1  | 305.8  | 224.3  | 322.1  | 278.7  | 247.1  | 0.262994127 | 302.725  | 268.05   | 34.675  | 1.129360194 | 0.2473   | -1.134 |
| 160215_at   | 2950.4 | 2876.8 | 3157   | 3163.6 | 3047.8 | 3168.2 | 3284.3 | 3227.9 | 0.158850358 | 3036.95  | 3182.05  | 145.1   | 0.954400465 | 0.1542   | -1.048 |
| 160216_f_at | 9.4    | 11.1   | 6.4    | 12.9   | 10.9   | 8.3    | 11.8   | 11.2   | 0.721280187 | 9.95     | 10.55    | 0.6     | 0.943127962 | 0.656    | -1.083 |
| 160217_at   | 172.9  | 148.5  | 184.7  | 264.9  | 199.2  | 204.5  | 130.5  | 130.9  | 0.448016807 | 192.75   | 166.275  | 26.475  | 1.159224177 | 0.4322   | -1.159 |
| 160218_at   | 729.5  | 583.2  | 630.1  | 737.2  | 879.6  | 733.8  | 787.9  | 714.8  | 0.084847029 | 670      | 779.025  | 109.025 | 0.860049421 | 0.08405  | 1.165  |
| 160219_r_at | 4.9    | 3.7    | 4.6    | 6      | 7.9    | 3.2    | 4.3    | 6.4    | 0.602272033 | 4.8      | 5.45     | 0.65    | 0.880733945 | 0.7223   | -1.088 |
| 160220_at   | 285.1  | 208.7  | 362.1  | 364.8  | 380.5  | 289.2  | 321.2  | 353.5  | 0.497822008 | 305.175  | 336.1    | 30.925  | 0.907988694 | 0.4531   | 1.123  |
| 160221_at   | 179.7  | 186    | 228.9  | 154    | 176.4  | 284.2  | 274.7  | 222.1  | 0.136540176 | 187.15   | 239.35   | 52.2    | 0.781909338 | 0.1331   | 1.269  |
| 160222_i_at | 19.1   | 15.6   | 23.8   | 7.3    | 13.6   | 4.3    | 12.2   | 5.4    | 0.128335875 | 16.45    | 8.875    | 7.575   | 1.853521127 | 0.1453   | -1.912 |
| 160223_at   | 227.8  | 187.2  | 216    | 190.6  | 181    | 191.5  | 203.5  | 179.3  | 0.206148127 | 205.4    | 188.825  | 16.575  | 1.08777969  | 0.1939   | -1.085 |
| 160224_at   | 27.3   | 8.1    | 9.2    | 34.5   | 29.8   | 4.3    | 19.9   | 46.7   | 0.644335713 | 19.775   | 25.175   | 5.4     | 0.78550149  | 0.8392   | 1.145  |
| 160225_at   | 1776.1 | 1217   | 1647.7 | 1278.7 | 1649.8 | 1388.1 | 1656.4 | 1311.8 | 0.899607278 | 1479.875 | 1501.525 | 21.65   | 0.985581326 | 0.8478   | -1.022 |
| 160226_at   | 303    | 318.9  | 336.3  | 405.9  | 358.2  | 450.8  | 384.8  | 315    | 0.360103044 | 341.025  | 377.2    | 36.175  | 0.90409597  | 0.3544   | 1.104  |
| 160227_s_at | 245.8  | 424    | 384.6  | 448.3  | 430.9  | 401.6  | 322.7  | 419.7  | 0.740990845 | 375.675  | 393.725  | 18.05   | 0.954155819 | 0.6767   | -1.069 |
| 160228_at   | 579    | 388.6  | 593.5  | 494.8  | 418.5  | 472.6  | 486.8  | 449.6  | 0.318893302 | 513.975  | 456.875  | 57.1    | 1.12497948  | 0.3434   | -1.112 |
| 160229_at   | 55.3   | 76.3   | 64.9   | 56.4   | 69.4   | 54.6   | 62.4   | 91.9   | 0.529126855 | 63.225   | 69.575   | 6.35    | 0.908731585 | 0.5457   | -1.089 |
| 160230_at   | 2586.5 | 1952.5 | 2104.1 | 2590.7 | 2392.3 | 2226.3 | 2332.2 | 2199.6 | 0.909593072 | 2308.45  | 2287.6   | 20.85   | 1.009114356 | 0.9804   | -1.002 |
| 160231_at   | 492    | 597.8  | 593.8  | 502    | 657.9  | 506.1  | 538.1  | 533.6  | 0.786827415 | 546.4    | 558.925  | 12.525  | 0.977590911 | 0.7906   | -1.022 |
| 160232_at   | 36.9   | 36.1   | 48.2   | 42.7   | 32.1   | 32.9   | 38     | 40.8   | 0.205806625 | 40.975   | 35.95    | 5.025   | 1.139777469 | 0.195    | -1.139 |
| 160233_at   | 523.7  | 399.7  | 567.5  | 600.5  | 343.4  | 434    | 435.6  | 410.7  | 0.069972456 | 522.85   | 405.925  | 116.925 | 1.288045821 | 0.05953  | -1.279 |
| 160234_at   | 1305.2 | 1413.9 | 1486   | 1520.1 | 1104.4 | 1538.1 | 1260.1 | 998.5  | 0.179611196 | 1431.3   | 1225.275 | 206.025 | 1.168145926 | 0.1434   | -1.182 |
| 160235_at   | 1679.6 | 1287.8 | 1447.3 | 1589.7 | 1194.2 | 1441.6 | 1314.5 | 1507.2 | 0.263193975 | 1501.1   | 1364.375 | 136.725 | 1.100210719 | 0.2704   | -1.099 |
| 160236_at   | 223.2  | 328.4  | 306.3  | 375.4  | 155.5  | 190    | 138.5  | 139    | 0.011988969 | 308.325  | 155.75   | 152.575 | 1.979614767 | 0.002291 | -1.962 |
| 160237_at   | 1453.1 | 1024.6 | 1175.4 | 994.5  | 1311   | 1153.5 | 1283.9 | 1143.2 | 0.619367314 | 1161.9   | 1222.9   | 61      | 0.950118571 | 0.5394   | -1.063 |
| 160238_at   | 56.4   | 56.2   | 36.1   | 112.3  | 50.1   | 67.1   | 39.6   | 40.6   | 0.418427417 | 65.25    | 49.35    | 15.9    | 1.32218845  | 0.4432   | -1.242 |
| 160239_at   | 3505.1 | 2648.3 | 3335.9 | 3221.4 | 2862.3 | 2787.8 | 3116.7 | 2960.5 | 0.286452151 | 3177.675 | 2931.825 | 245.85  | 1.083855619 | 0.2934   | -1.079 |
| 160240_at   | 2118.1 | 1889.5 | 2222.6 | 2015.2 | 1770.4 | 2142.9 | 2299.1 | 2266.5 | 0.695695803 | 2061.35  | 2119.725 | 58.375  | 0.97246105  | 0.7372   | -1.025 |
| 160241_at   | 38.6   | 71.4   | 46.2   | 28.2   | 40.3   | 51.2   | 43.8   | 24.3   | 0.591261017 | 46.1     | 39.9     | 6.2     | 1.155388471 | 0.643    | -1.131 |
| 160242_at   | 261.8  | 373.2  | 330.3  | 320.6  | 307.6  | 366.8  | 391.9  | 340.5  | 0.342570341 | 321.475  | 351.7    | 30.225  | 0.914060279 | 0.3381   | -1.098 |
| 160243_r_at | 23.5   | 8.6    | 2.1    | 7.3    | 4.7    | 5.6    | 27.5   | 52     | 0.374244178 | 10.375   | 22.45    | 12.075  | 0.462138085 | 0.4542   | 1.851  |
| 160244_at   | 282.2  | 323.9  | 278.5  | 281.8  | 327.5  | 255.3  | 307.3  | 316.6  | 0.622929028 | 291.6    | 301.675  | 10.075  | 0.966603133 | 0.6524   | -1.032 |
| 160245_at   | 282.1  | 612.4  | 535.5  | 555.6  | 578.1  | 769.2  | 500.2  | 737.3  | 0.175748851 | 496.4    | 646.2    | 149.8   | 0.768183225 | 0.2051   | 1.337  |
| 160246_at   | 617.2  | 389.6  | 448.1  | 436    | 250.4  | 501.3  | 395.7  | 424.9  | 0.313291954 | 472.725  | 393.075  | 79.65   | 1.202633085 | 0.3051   | -1.221 |
| 160247_at   | 527.5  | 328    | 399.1  | 376.2  | 321.9  | 386.4  | 387.1  | 341.9  | 0.35071698  | 407.7    | 359.325  | 48.375  | 1.134627426 | 0.3392   | -1.121 |
| 160248_at   | 1775.4 | 1128.9 | 1631   | 1685.5 | 815.6  | 1325.2 | 1054.7 | 907.3  | 0.02967781  | 1555.2   | 1025.7   | 529.5   | 1.516232817 | 0.02971  | -1.519 |
| 160249_at   | 799    | 723.4  | 668.8  | 797.4  | 561.8  | 971    | 864.4  | 666.1  | 0.85893954  | 747.15   | 765.825  | 18.675  | 0.975614533 | 0.9726   | -1.005 |
| 160250_at   | 228.7  | 318.4  | 304.8  | 330.7  | 275    | 305.6  | 323.3  | 335.2  | 0.616720384 | 295.65   | 309.775  | 14.125  | 0.954402389 | 0.5884   | -1.055 |
| 160251_at   | 1542.4 | 1252.3 | 1414.3 | 1437.1 | 1248.4 | 1300.9 | 1612.1 | 1504.5 | 0.963890921 | 1411.525 | 1416.475 | 4.95    | 0.99650541  | 0.9918   | -1.001 |
| 160252_at   | 3976.1 | 3629.8 | 3624.6 | 3601.1 | 3211.4 | 3513.9 | 3552.2 | 3696   | 0.165663278 | 3707.9   | 3493.375 | 214.525 | 1.061409096 | 0.1645   | -1.062 |
| 160253_at   | 1855.2 | 1493.9 | 1684.1 | 1679.4 | 1319.6 | 1791.5 | 1453.9 | 2045.5 | 0.89391052  | 1678.15  | 1652.625 | 25.525  | 1.015445125 | 0.8105   | -1.028 |
| 160254_at   | 33.5   | 46     | 56.3   | 97.5   | 49.2   | 40.2   | 34.6   | 46.2   | 0.341530789 | 58.325   | 42.55    | 15.775  | 1.370740306 | 0.3393   | -1.28  |
| 160255_at   | 3269.2 | 3080.9 | 3207.7 | 3013.4 | 3679.8 | 3243.6 | 3632.8 | 3135.6 | 0.131814833 | 3142.8   | 3422.95  | 280.15  | 0.918155392 | 0.1079   | -1.087 |
| 160256_at   | 3670.4 | 2878.9 | 3201.3 | 3647.2 | 3788.6 | 3054.7 | 3286.5 | 3274.4 | 0.995023343 | 3349.45  | 3351.05  | 1.6     | 0.999522538 | 0.9758   | -1.002 |
| 160257_at   | 4989.4 | 4704.7 | 4565   | 4729.2 | 3314.4 | 3985.1 | 3847   | 4066.5 | 0.005626069 | 4747.075 | 3803.25  | 943.825 | 1.248162756 | 0.0041   | -1.251 |
| 160258_at   | 729    | 674    | 870.7  | 701    | 1216.8 | 567.3  | 817.1  | 840.8  | 0.457973857 | 743.675  | 860.5    | 116.825 | 0.864235909 | 0.5154   | 1.121  |
| 160259_at   | 9.2    | 7.2    | 7.9    | 8.3    | 10.7   | 9.9    | 7      | 47.7   | 0.349811743 | 8.15     | 18.825   | 10.675  | 0.432934927 | 0.2663   | 1.69   |
| 160260_at   | 285.5  | 259.9  | 230.7  | 286.6  | 312.8  | 268.5  | 225.6  | 268.2  | 0.893675744 | 265.675  | 268.775  | 3.1     | 0.988466189 | 0.9194   | -1.009 |
| 160261_i_at | 1330.9 | 1763.3 | 1089.4 | 1867.1 | 843.7  | 1309.5 | 1042.4 | 1443.6 | 0.17508543  | 1512.675 | 1159.8   | 352.875 | 1.304255044 | 0.1805   | -1.302 |
| 160262_at   | 3146.6 | 2400.9 | 2677.7 | 3246   | 2112.2 | 2728.7 | 2199.1 | 3285.3 | 0.430001556 | 2867.8   | 2581.325 | 286.475 | 1.110979826 | 0.3959   | -1.121 |
| 160263_r_at | 229.5  | 157.5  | 181.5  | 199.1  | 118.4  | 237.8  | 167.9  | 217.7  | 0.84252474  | 191.9    | 185.45   | 6.45    | 1.034780264 | 0.746    | -1.061 |



|             |        |        |        |        |        |        |        |        |             |          |          |         |             |          |        |
|-------------|--------|--------|--------|--------|--------|--------|--------|--------|-------------|----------|----------|---------|-------------|----------|--------|
| 160264_s_at | 299.8  | 345.7  | 232.8  | 235.6  | 477.1  | 281.4  | 299.1  | 310.7  | 0.284400067 | 278.475  | 342.075  | 63.6    | 0.814075861 | 0.2497   | 1.217  |
| 160265_at   | 1049.3 | 1113.5 | 1070.2 | 974.6  | 843    | 1441   | 1469   | 945.5  | 0.510102141 | 1051.9   | 1174.625 | 122.725 | 0.895519847 | 0.597    | -1.085 |
| 160266_r_at | 1658   | 1594.7 | 1792.4 | 2002.6 | 1895.6 | 1825.7 | 1742   | 1582.5 | 0.996781521 | 1761.925 | 1761.45  | 0.475   | 1.000269664 | 0.9846   | -1.001 |
| 160267_at   | 443    | 392    | 338.6  | 723.2  | 294.7  | 333    | 363.5  | 591.1  | 0.497813845 | 474.2    | 395.575  | 78.625  | 1.198761297 | 0.4641   | -1.192 |
| 160268_at   | 1521.3 | 1067.5 | 1335.5 | 1433.1 | 1707.8 | 1339.2 | 1371.2 | 1334   | 0.487586595 | 1339.35  | 1438.05  | 98.7    | 0.931365391 | 0.4758   | -1.077 |
| 160269_at   | 731.7  | 856    | 663.3  | 699.7  | 972.3  | 710.1  | 796.7  | 850.2  | 0.222485159 | 737.675  | 832.325  | 94.65   | 0.886282402 | 0.2141   | -1.126 |
| 160270_at   | 2288.4 | 1567.4 | 2154.6 | 1949   | 1171.3 | 1838.5 | 2099.1 | 2035.7 | 0.472300223 | 1989.85  | 1786.15  | 203.7   | 1.114044173 | 0.4671   | -1.131 |
| 160271_at   | 1657.1 | 1519.6 | 1407   | 1433.9 | 1874.3 | 1525.9 | 1671.8 | 1766   | 0.072430245 | 1504.4   | 1709.5   | 205.1   | 0.880023399 | 0.06776  | 1.135  |
| 160272_at   | 1250.9 | 1244.3 | 1077.1 | 1343.6 | 1875.9 | 1112   | 1170.9 | 1242   | 0.553416941 | 1228.975 | 1350.2   | 121.225 | 0.910217005 | 0.5824   | -1.077 |
| 160273_at   | 976.9  | 1663   | 1104.6 | 1156.4 | 933    | 1083.7 | 919.9  | 1126   | 0.264259792 | 1225.225 | 1015.65  | 209.575 | 1.20634569  | 0.2219   | -1.186 |
| 160274_at   | 14.8   | 10.6   | 18.4   | 28.3   | 11.4   | 16.3   | 42.6   | 41.7   | 0.329733589 | 18.025   | 28       | 9.975   | 0.64375     | 0.4089   | 1.416  |
| 160275_at   | 987.7  | 806.2  | 1185.4 | 809.4  | 1214.9 | 993.5  | 958.7  | 860.1  | 0.629402787 | 947.175  | 1006.8   | 59.625  | 0.940777712 | 0.5928   | -1.068 |
| 160276_at   | 13     | 31     | 7.7    | 8.2    | 51.8   | 24.1   | 6.7    | 42.3   | 0.217314997 | 14.975   | 31.225   | 16.25   | 0.479583667 | 0.2863   | 1.929  |
| 160277_at   | 2203.8 | 1654.8 | 1954.4 | 2065.9 | 1159.8 | 1681.7 | 1499.1 | 1689.7 | 0.035048538 | 1969.725 | 1507.575 | 462.15  | 1.306551913 | 0.044    | -1.314 |
| 160278_at   | 851.1  | 1022.6 | 933.3  | 697.6  | 1530.6 | 696    | 1059.9 | 754.4  | 0.547160545 | 876.15   | 1010.225 | 134.075 | 0.867282041 | 0.6247   | -1.107 |
| 160279_at   | 2608.6 | 1553.6 | 2239.8 | 2035.9 | 1356.9 | 1811.3 | 1519.1 | 2159.2 | 0.210094359 | 2109.475 | 1711.625 | 397.85  | 1.232439933 | 0.2135   | -1.231 |
| 160280_at   | 1901.5 | 1147.9 | 1275.9 | 1622.3 | 869.2  | 1216.5 | 1103.7 | 1315.5 | 0.128261971 | 1486.9   | 1126.225 | 360.675 | 1.320251282 | 0.113    | -1.31  |
| 160281_at   | 1409.5 | 1558.9 | 1390.1 | 1333.5 | 1497.8 | 1588.9 | 1568.7 | 923.5  | 0.873578792 | 1423     | 1394.725 | 28.275  | 1.020272814 | 0.7668   | -1.043 |
| 160282_at   | 734.4  | 1110.4 | 1007.3 | 951    | 1043.6 | 985.3  | 1026.8 | 1021.8 | 0.452910378 | 950.775  | 1019.375 | 68.6    | 0.932703863 | 0.4005   | -1.084 |
| 160283_at   | 2603.6 | 1994.9 | 2274.3 | 1930.5 | 2460.3 | 1989   | 2411.8 | 2247.7 | 0.698517982 | 2200.825 | 2277.2   | 76.375  | 0.966461005 | 0.6666   | -1.039 |
| 160284_at   | 212.5  | 188    | 197.5  | 215.5  | 266.8  | 274.7  | 231.4  | 254.5  | 0.004709929 | 203.375  | 256.85   | 53.475  | 0.791804555 | 0.003271 | 1.262  |
| 160285_at   | 515.8  | 448.1  | 436    | 555.9  | 379.6  | 556.2  | 477.4  | 436.8  | 0.593300121 | 488.95   | 462.5    | 26.45   | 1.057189189 | 0.5647   | -1.062 |
| 160286_at   | 1766.5 | 2094.7 | 1712.9 | 2703.8 | 1557.5 | 1469.9 | 1657.1 | 1488   | 0.10189564  | 2069.475 | 1543.125 | 526.35  | 1.34109356  | 0.0424   | -1.32  |
| 160287_at   | 2133.7 | 2056.2 | 2198   | 1689.1 | 2624.7 | 1804.9 | 1828   | 1728.6 | 0.928391329 | 2019.25  | 1996.55  | 22.7    | 1.011369613 | 0.8585   | -1.021 |
| 160288_at   | 2764.3 | 2502.7 | 2051.6 | 2128.2 | 1980.2 | 2223.7 | 2067.6 | 2339.4 | 0.316879442 | 2361.7   | 2152.725 | 208.975 | 1.097074638 | 0.3118   | -1.091 |
| 160289_s_at | 897.4  | 853.3  | 906.9  | 986.6  | 674    | 972.2  | 806.1  | 866    | 0.295463772 | 911.05   | 829.575  | 81.475  | 1.09821294  | 0.2663   | -1.106 |
| 160290_at   | 802.8  | 500.8  | 661.7  | 821.7  | 379.8  | 679    | 655.2  | 477.2  | 0.200067359 | 696.75   | 547.8    | 148.95  | 1.271905805 | 0.2137   | -1.283 |
| 160291_at   | 2338.3 | 2407.8 | 2087.9 | 2541.8 | 2749   | 2635   | 2733.2 | 2644.4 | 0.030539582 | 2343.95  | 2690.4   | 346.45  | 0.871227327 | 0.01709  | 1.151  |
| 160292_at   | 141.5  | 166.4  | 149.5  | 105    | 332.6  | 204.9  | 229.3  | 250.3  | 0.018420185 | 140.6    | 254.275  | 113.675 | 0.552944647 | 0.006158 | 1.804  |
| 160293_at   | 3077.8 | 2015.4 | 2149.6 | 2261.4 | 2236.2 | 2426.2 | 2673.3 | 2127.7 | 0.971246922 | 2376.05  | 2365.85  | 10.2    | 1.004311347 | 0.9584   | -1.006 |
| 160294_at   | 461.3  | 772.6  | 331.9  | 484.8  | 591.6  | 448.2  | 587.1  | 581.1  | 0.7127593   | 512.65   | 552      | 39.35   | 0.928713768 | 0.5637   | 1.121  |
| 160295_at   | 938.8  | 896.5  | 1058.8 | 895.1  | 1132.5 | 911    | 1266.9 | 791.7  | 0.531711499 | 947.3    | 1025.525 | 78.225  | 0.923721996 | 0.5856   | -1.067 |
| 160296_at   | 1180.7 | 1470.6 | 1222.6 | 1467.8 | 1006.5 | 1520.8 | 1259.4 | 1325.4 | 0.679242793 | 1335.425 | 1278.025 | 57.4    | 1.044913049 | 0.6498   | -1.051 |
| 160297_at   | 690.7  | 432.6  | 517    | 486.8  | 485.6  | 459.3  | 454.6  | 444.7  | 0.295315465 | 531.775  | 461.05   | 70.725  | 1.153399848 | 0.2532   | -1.136 |
| 160298_at   | 286.7  | 211.5  | 253    | 274.3  | 287.7  | 268.8  | 267.4  | 363.6  | 0.203825752 | 256.375  | 296.875  | 40.5    | 0.863578947 | 0.1916   | 1.156  |
| 160299_at   | 1290.9 | 1090.5 | 1083.1 | 1174.3 | 1114.5 | 1153.7 | 1016   | 1136.3 | 0.384165388 | 1159.7   | 1105.125 | 54.575  | 1.049383554 | 0.3838   | -1.048 |
| 160300_at   | 559    | 428.9  | 351.5  | 486.1  | 545.4  | 381.1  | 354.1  | 682.1  | 0.71422929  | 456.375  | 490.675  | 34.3    | 0.930096296 | 0.7903   | -1.052 |
| 160301_at   | 758.7  | 629.1  | 678    | 741.6  | 398.4  | 616.8  | 530    | 825.5  | 0.317795624 | 701.85   | 592.675  | 109.175 | 1.184207196 | 0.2506   | -1.222 |
| 160302_at   | 811.5  | 554.6  | 612.8  | 635.9  | 488    | 719.7  | 652.1  | 631    | 0.688943078 | 653.7    | 622.7    | 31      | 1.049783202 | 0.6902   | -1.05  |
| 160303_at   | 568.8  | 433.7  | 466.6  | 458.2  | 391.4  | 577    | 636.4  | 518.9  | 0.453765514 | 481.825  | 530.925  | 49.1    | 0.907519895 | 0.4995   | -1.09  |
| 160304_r_at | 112.1  | 86.4   | 155.4  | 102.2  | 41.7   | 137.9  | 117.5  | 176    | 0.899685204 | 114.025  | 118.275  | 4.25    | 0.964066793 | 0.8567   | -1.066 |
| 160305_at   | 828.1  | 1088.2 | 806.7  | 980.8  | 898.1  | 810    | 904.5  | 795.9  | 0.364685865 | 925.95   | 852.125  | 73.825  | 1.08663635  | 0.3646   | -1.08  |
| 160306_at   | 43.3   | 59.7   | 65.6   | 56.5   | 82.5   | 42.3   | 47.2   | 81.3   | 0.580373953 | 56.275   | 63.325   | 7.05    | 0.888669562 | 0.689    | -1.087 |
| 160307_at   | 322.5  | 406.8  | 346.1  | 433.9  | 440.7  | 429.1  | 497.5  | 496.4  | 0.034955489 | 377.325  | 465.925  | 88.6    | 0.80984064  | 0.03451  | 1.241  |
| 160308_at   | 1500.6 | 1092   | 1127.7 | 1172.3 | 933    | 1369   | 1177.1 | 983.7  | 0.462198527 | 1223.15  | 1115.7   | 107.45  | 1.096307251 | 0.4329   | -1.1   |
| 160309_at   | 1473.8 | 1896.4 | 1626.2 | 1499.4 | 1679.7 | 1524.7 | 1713.4 | 1545.8 | 0.943708458 | 1623.95  | 1615.9   | 8.05    | 1.004981744 | 0.9858   | -1.001 |
| 160310_at   | 1130.2 | 991.6  | 977.8  | 999.9  | 1082.6 | 1111   | 910.8  | 1115.7 | 0.635676593 | 1024.875 | 1055.025 | 30.15   | 0.971422478 | 0.6592   | -1.028 |
| 160311_at   | 532.2  | 835.6  | 620.7  | 973.4  | 852.6  | 957.7  | 871.8  | 1048.1 | 0.153044007 | 740.475  | 932.55   | 192.075 | 0.794032492 | 0.1295   | 1.291  |
| 160312_at   | 306.7  | 239.2  | 229.1  | 316    | 160.8  | 227.7  | 243.3  | 344.5  | 0.544998144 | 272.75   | 244.075  | 28.675  | 1.11748438  | 0.4672   | -1.147 |
| 160313_at   | 1026.1 | 1230.6 | 1176.9 | 1117.3 | 951.5  | 1102.8 | 940.5  | 1206   | 0.306449613 | 1137.725 | 1050.2   | 87.525  | 1.083341268 | 0.2896   | -1.087 |
| 160314_at   | 1842.2 | 1973.1 | 1972.9 | 1702.2 | 2678.5 | 1589   | 2166.8 | 1769.9 | 0.520845257 | 1872.6   | 2051.05  | 178.45  | 0.912995783 | 0.5688   | -1.075 |
| 160315_at   | 35.6   | 24.7   | 39     | 41.6   | 40.5   | 21.4   | 19.5   | 29.6   | 0.265934653 | 35.225   | 27.75    | 7.475   | 1.269369369 | 0.2437   | -1.3   |
| 160316_at   | 506.5  | 487    | 681.2  | 524.4  | 466.6  | 516.4  | 513.6  | 542.4  | 0.447117898 | 549.775  | 509.75   | 40.025  | 1.078518882 | 0.4396   | -1.07  |
| 160317_at   | 1266.7 | 1573.7 | 1475.9 | 1101.1 | 1891.2 | 1546.2 | 1628.8 | 1496.4 | 0.084330566 | 1354.35  | 1640.65  | 286.3   | 0.825495992 | 0.0841   | 1.218  |
| 160318_at   | 1345.2 | 1851.4 | 1485.4 | 1348.3 | 2232.5 | 1445.9 | 1842.9 | 1366   | 0.399892603 | 1507.575 | 1721.825 | 214.25  | 0.875568075 | 0.4044   | 1.13   |
| 160319_at   | 2184.3 | 2145.7 | 2186   | 1870.9 | 2005.6 | 2623.7 | 2553.4 | 2241   | 0.176528977 | 2096.725 | 2355.925 | 259.2   | 0.88997952  | 0.1711   | 1.119  |



|             |        |        |        |        |        |        |        |        |             |          |          |          |             |          |        |
|-------------|--------|--------|--------|--------|--------|--------|--------|--------|-------------|----------|----------|----------|-------------|----------|--------|
| 160320_at   | 291.5  | 342.1  | 284.2  | 341.4  | 247.2  | 259.2  | 269.8  | 207.9  | 0.01634488  | 314.8    | 246.025  | 68.775   | 1.279544762 | 0.01732  | -1.281 |
| 160321_at   | 1126.6 | 1666.7 | 1420.5 | 1597.4 | 1436.2 | 1423.1 | 1646.6 | 1539.7 | 0.677857605 | 1452.8   | 1511.4   | 58.6     | 0.961228001 | 0.6224   | -1.05  |
| 160322_at   | 1726.3 | 1234.7 | 1420.3 | 1346.5 | 1298   | 1452.8 | 1368.4 | 1248.2 | 0.474144993 | 1431.95  | 1341.85  | 90.1     | 1.067146104 | 0.4803   | -1.061 |
| 160323_at   | 955.9  | 740    | 813.6  | 709.8  | 906.1  | 703.6  | 775    | 649.9  | 0.575449569 | 804.825  | 758.65   | 46.175   | 1.060864694 | 0.5589   | -1.062 |
| 160324_at   | 1327.8 | 1160.3 | 1194.1 | 1241.4 | 1544.6 | 1119.9 | 1299.6 | 1079.2 | 0.80368663  | 1230.9   | 1260.825 | 29.925   | 0.97626554  | 0.8675   | -1.015 |
| 160325_r_at | 18.8   | 164.4  | 120    | 126.9  | 189.3  | 152.5  | 134.2  | 24.1   | 0.724058336 | 107.525  | 125.025  | 17.5     | 0.860027994 | 0.8134   | 1.185  |
| 160326_at   | 921.3  | 1388.7 | 1132.6 | 1196.9 | 1000.6 | 931    | 1016   | 995.1  | 0.167539336 | 1159.875 | 985.675  | 174.2    | 1.176731681 | 0.1304   | -1.165 |
| 160327_at   | 1306.2 | 1129.1 | 1167.4 | 1232   | 1133.8 | 1083.5 | 1161.8 | 1151.3 | 0.145525797 | 1208.675 | 1132.6   | 76.075   | 1.067168462 | 0.1219   | -1.066 |
| 160328_at   | 302.6  | 493.7  | 317.6  | 445.9  | 594.5  | 518.7  | 665.1  | 478.8  | 0.032640981 | 389.95   | 564.275  | 174.325  | 0.691063754 | 0.03539  | 1.468  |
| 160329_at   | 146.2  | 252.4  | 249.7  | 185.7  | 186.3  | 271.8  | 227    | 208.4  | 0.656307964 | 208.5    | 223.375  | 14.875   | 0.933407946 | 0.6041   | -1.088 |
| 160330_at   | 1378.4 | 811.6  | 1182.8 | 1176.6 | 844.4  | 925.2  | 982.6  | 1149.5 | 0.287153496 | 1137.35  | 975.425  | 161.925  | 1.166004562 | 0.3166   | -1.153 |
| 160331_at   | 30.6   | 20.6   | 36.4   | 32.8   | 48.8   | 28.5   | 36.8   | 30.9   | 0.321867428 | 30.1     | 36.25    | 6.15     | 0.830344828 | 0.324    | 1.203  |
| 160332_at   | 139.7  | 57.8   | 109.9  | 110.1  | 78.7   | 42.7   | 27.7   | 117.4  | 0.202225673 | 104.375  | 66.625   | 37.75    | 1.566604128 | 0.1914   | -1.728 |
| 160333_at   | 3165.9 | 3016.1 | 2957.4 | 2757.8 | 2455.9 | 2666.3 | 2753.3 | 2892.3 | 0.064068953 | 2974.3   | 2691.95  | 282.35   | 1.104886792 | 0.06609  | -1.106 |
| 160334_at   | 32.8   | 37.6   | 21.9   | 39.3   | 81.4   | 29.9   | 35.2   | 12.2   | 0.683727783 | 32.9     | 39.675   | 6.775    | 0.829237555 | 0.9924   | -1.004 |
| 160335_at   | 210.1  | 276.3  | 230.4  | 384.4  | 293.3  | 297.8  | 278.5  | 309    | 0.65563783  | 275.3    | 294.65   | 19.35    | 0.934328865 | 0.5083   | -1.1   |
| 160336_at   | 94.3   | 98.8   | 89.4   | 168.7  | 101.7  | 39.7   | 117.6  | 223.2  | 0.863376029 | 112.8    | 120.55   | 7.75     | 0.935711323 | 0.8609   | -1.073 |
| 160337_at   | 1703.7 | 2790.7 | 2045.3 | 2260.8 | 2429.9 | 2169.5 | 2498.2 | 2302.1 | 0.568481354 | 2200.125 | 2349.925 | 149.8    | 0.936253285 | 0.4831   | -1.084 |
| 160338_at   | 936.6  | 1132.3 | 1133.5 | 1339.6 | 749.6  | 941.2  | 916.9  | 1091.5 | 0.10024193  | 1135.5   | 924.8    | 210.7    | 1.227833045 | 0.1009   | -1.229 |
| 160339_at   | 314.3  | 355.2  | 371.6  | 379.4  | 323.7  | 267.1  | 367.4  | 434.8  | 0.86619823  | 355.125  | 348.25   | 6.875    | 1.019741565 | 0.7784   | -1.033 |
| 160340_at   | 44.6   | 54.4   | 53.7   | 51.4   | 32.6   | 39.1   | 66.2   | 61     | 0.886824454 | 51.025   | 49.725   | 1.3      | 1.026143791 | 0.7233   | -1.068 |
| 160341_at   | 1612.3 | 1376.7 | 1285.9 | 1410   | 1894.9 | 1256.1 | 1523.5 | 1554.4 | 0.404246016 | 1421.225 | 1557.225 | 136      | 0.912665158 | 0.4162   | -1.088 |
| 160342_r_at | 4.5    | 6.6    | 4.5    | 3.5    | 3.8    | 8.6    | 5.4    | 5.2    | 0.454795945 | 4.775    | 5.75     | 0.975    | 0.830434783 | 0.4491   | 1.187  |
| 160343_at   | 582.5  | 513.2  | 571.8  | 482.1  | 708.4  | 511.8  | 654.9  | 466.2  | 0.483979024 | 537.4    | 585.325  | 47.925   | 0.918122411 | 0.5234   | -1.077 |
| 160344_at   | 2729.5 | 2335.3 | 2598.3 | 1979.1 | 2486.6 | 2744.6 | 2732.9 | 2352.6 | 0.420133564 | 2410.55  | 2579.175 | 168.625  | 0.934620567 | 0.3999   | -1.076 |
| 160345_at   | 994.9  | 1085.6 | 1153.9 | 825    | 1894.5 | 907.6  | 1253.3 | 769.4  | 0.509599875 | 1014.85  | 1206.2   | 191.35   | 0.8413613   | 0.5929   | 1.127  |
| 160346_at   | 296.7  | 523.1  | 414    | 438.1  | 610.7  | 521.2  | 466.7  | 397.3  | 0.258522164 | 417.975  | 498.975  | 81       | 0.837667218 | 0.261    | 1.203  |
| 160347_at   | 1151.5 | 1004.7 | 1082.7 | 990.8  | 1058.3 | 901.3  | 993.5  | 969.4  | 0.172232872 | 1057.425 | 980.625  | 76.8     | 1.0783174   | 0.1694   | -1.078 |
| 160348_at   | 856.7  | 1002.3 | 943.5  | 673.2  | 1114.8 | 892.6  | 1077.8 | 694.7  | 0.552458596 | 868.925  | 944.975  | 76.05    | 0.91952168  | 0.5963   | -1.081 |
| 160349_at   | 367.5  | 413.3  | 432.5  | 462.8  | 592.8  | 423.3  | 558.4  | 473.8  | 0.092136745 | 419.025  | 512.075  | 93.05    | 0.818288337 | 0.07537  | 1.215  |
| 160350_at   | 822.8  | 880.3  | 725    | 853    | 1040.8 | 949.1  | 884.1  | 930.8  | 0.032233404 | 820.275  | 951.2    | 130.925  | 0.862358074 | 0.03407  | 1.161  |
| 160351_at   | 199.7  | 316.3  | 182.4  | 270.8  | 273.1  | 203.1  | 273.6  | 161.9  | 0.741808229 | 242.3    | 227.925  | 14.375   | 1.063068992 | 0.7529   | -1.061 |
| 160352_at   | 257.6  | 279.3  | 346.3  | 274.7  | 378.3  | 416.8  | 326.3  | 282.8  | 0.138568052 | 289.475  | 351.05   | 61.575   | 0.824597636 | 0.1274   | 1.207  |
| 160353_i_at | 243.4  | 290.3  | 329.9  | 349.2  | 139.6  | 352.1  | 126.2  | 252.4  | 0.21153198  | 303.2    | 217.575  | 85.625   | 1.393542457 | 0.1598   | -1.51  |
| 160354_at   | 31.8   | 20.9   | 48.3   | 16.1   | 43.8   | 27.6   | 36.7   | 13.9   | 0.902909624 | 29.275   | 30.5     | 1.225    | 0.959836066 | 0.9047   | -1.045 |
| 160355_at   | 198.7  | 331    | 433.1  | 264.9  | 257.1  | 404.3  | 349.1  | 288.5  | 0.776950442 | 306.925  | 324.75   | 17.825   | 0.945111624 | 0.6873   | -1.085 |
| 160356_at   | 1987.1 | 1687.3 | 1475.8 | 1704.7 | 1215.6 | 1761.8 | 1452.9 | 1504.7 | 0.184926433 | 1713.725 | 1483.75  | 229.975  | 1.154995788 | 0.1817   | -1.159 |
| 160357_at   | 118.6  | 121.8  | 169.8  | 124.8  | 102.3  | 158.3  | 117.9  | 125.9  | 0.666494326 | 133.75   | 126.1    | 7.65     | 1.060666138 | 0.6427   | -1.062 |
| 160358_at   | 1472.7 | 1280   | 1614.7 | 1615.9 | 1606.5 | 1776.7 | 2082.4 | 1622   | 0.093435308 | 1495.825 | 1771.9   | 276.075  | 0.844192675 | 0.08442  | 1.183  |
| 160359_at   | 773.3  | 804.3  | 675.5  | 735.7  | 1138.3 | 933    | 832.4  | 869.3  | 0.056863024 | 747.2    | 943.25   | 196.05   | 0.792154784 | 0.02771  | 1.256  |
| 160360_at   | 7309.9 | 7315.6 | 7950.1 | 6425.3 | 9268.6 | 7396.8 | 7711.8 | 6339.1 | 0.559989298 | 7250.225 | 7679.075 | 428.85   | 0.94415343  | 0.5892   | -1.052 |
| 160361_at   | 1063.9 | 1000.7 | 1196   | 965.7  | 1129.5 | 1047.1 | 1078.7 | 858.9  | 0.731419742 | 1056.575 | 1028.55  | 28.025   | 1.027247095 | 0.7193   | -1.029 |
| 160362_at   | 1780.5 | 1889.7 | 1890.6 | 1929.5 | 1770.4 | 1622.5 | 1676.4 | 1750.5 | 0.011719255 | 1872.575 | 1704.95  | 167.625  | 1.098316666 | 0.01227  | -1.099 |
| 160363_at   | 802.5  | 1202.3 | 1250.6 | 1067.2 | 1002.2 | 1136.8 | 1045.6 | 1074.2 | 0.887034162 | 1080.65  | 1064.7   | 15.95    | 1.014980746 | 0.9886   | -1.002 |
| 160364_at   | 3238.2 | 3654.7 | 3895.2 | 4671.7 | 3218.2 | 3108.5 | 2921.9 | 3796.3 | 0.149648032 | 3864.95  | 3261.225 | 603.725  | 1.185122155 | 0.1307   | -1.18  |
| 160365_at   | 337.4  | 211.2  | 333.5  | 248.2  | 301.8  | 376.6  | 256.1  | 269    | 0.674763565 | 282.575  | 300.875  | 18.3     | 0.939177399 | 0.6399   | -1.073 |
| 160366_at   | 1622.6 | 1121   | 1320.1 | 1324.1 | 1296.3 | 1318.9 | 1367.4 | 1306.9 | 0.828719037 | 1346.95  | 1322.375 | 24.575   | 1.018583987 | 0.9007   | -1.01  |
| 160367_at   | 219.4  | 426.8  | 378.5  | 299.9  | 365.8  | 275.4  | 328.3  | 215.8  | 0.559141043 | 331.15   | 296.325  | 34.825   | 1.11752299  | 0.6124   | -1.105 |
| 160368_at   | 57.8   | 49.8   | 71.3   | 102.1  | 100.7  | 116.7  | 29.5   | 39.8   | 0.956231995 | 70.25    | 71.675   | 1.425    | 0.980118591 | 0.7878   | -1.111 |
| 160369_at   | 70.1   | 90.3   | 85.4   | 74.5   | 103.6  | 75.6   | 105.5  | 84.9   | 0.212418206 | 80.075   | 92.4     | 12.325   | 0.866612554 | 0.2125   | 1.149  |
| 160370_at   | 118.3  | 136.8  | 134.1  | 133    | 159.9  | 199.9  | 224.5  | 182    | 0.016742249 | 130.55   | 191.575  | 61.025   | 0.681456349 | 0.003074 | 1.459  |
| 160371_at   | 3816.6 | 2339.7 | 3513.5 | 3262.3 | 1419.8 | 2594.1 | 2280.5 | 2042.4 | 0.031392096 | 3233.025 | 2084.2   | 1148.825 | 1.551206698 | 0.0378   | -1.563 |
| 160372_at   | 216    | 284.9  | 286.3  | 300.1  | 370    | 291.8  | 352.1  | 315.6  | 0.057983378 | 271.825  | 332.375  | 60.55    | 0.81782625  | 0.06784  | 1.227  |
| 160373_i_at | 474.7  | 445.3  | 482.1  | 477.6  | 169.3  | 452.3  | 533.2  | 117.5  | 0.235978962 | 469.925  | 318.075  | 151.85   | 1.477403128 | 0.1682   | -1.785 |
| 160374_r_at | 38.8   | 40.4   | 47.7   | 51.1   | 63.9   | 59.4   | 48.9   | 54.3   | 0.032463839 | 44.5     | 56.625   | 12.125   | 0.785871965 | 0.03231  | 1.274  |
| 160375_at   | 7.6    | 25.2   | 19.5   | 4.7    | 13.7   | 5.5    | 9.6    | 10.2   | 0.434170533 | 14.25    | 9.75     | 4.5      | 1.461538462 | 0.6434   | -1.24  |



|             |        |        |         |        |         |        |         |        |             |          |          |         |             |          |        |
|-------------|--------|--------|---------|--------|---------|--------|---------|--------|-------------|----------|----------|---------|-------------|----------|--------|
| 160376_at   | 329.1  | 550.7  | 482.5   | 473.4  | 451.5   | 409.1  | 557.4   | 578.7  | 0.540701341 | 458.925  | 499.175  | 40.25   | 0.919366955 | 0.5346   | -1.095 |
| 160377_at   | 1518.6 | 1088.4 | 1137.9  | 1394.9 | 878.7   | 1167.2 | 999.4   | 1155.6 | 0.113691348 | 1284.95  | 1050.225 | 234.725 | 1.223499726 | 0.1058   | -1.22  |
| 160378_at   | 1052.7 | 936.8  | 1182    | 985.5  | 709.8   | 1119   | 830.4   | 1085.1 | 0.404815764 | 1039.25  | 936.075  | 103.175 | 1.110220869 | 0.3635   | -1.126 |
| 160379_at   | 124.2  | 181    | 158.3   | 179.9  | 143.1   | 200.6  | 151.4   | 194.2  | 0.582879386 | 160.85   | 172.325  | 11.475  | 0.933410707 | 0.5948   | -1.071 |
| 160380_at   | 1414.9 | 1350.7 | 1485.2  | 1523   | 1435.4  | 1500.8 | 1408.3  | 1475.4 | 0.801903372 | 1443.45  | 1454.975 | 11.525  | 0.992078902 | 0.7832   | -1.009 |
| 160381_at   | 345.1  | 267.9  | 318.7   | 327.1  | 234.9   | 332.5  | 294.1   | 299.8  | 0.389544135 | 314.7    | 290.325  | 24.375  | 1.083957634 | 0.3931   | -1.088 |
| 160382_at   | 288.3  | 389.4  | 368.4   | 475.1  | 392.8   | 470.7  | 441.6   | 358.4  | 0.471469512 | 380.3    | 415.875  | 35.575  | 0.914457469 | 0.4363   | -1.105 |
| 160383_at   | 3681.4 | 3095.3 | 2869.7  | 2423   | 3462.3  | 3036.9 | 2670.2  | 3385.5 | 0.717854583 | 3017.35  | 3138.725 | 121.375 | 0.961329839 | 0.6805   | -1.047 |
| 160384_at   | 6065.1 | 6182.9 | 5756.2  | 4962.5 | 6294    | 5315.4 | 6226.9  | 5234.7 | 0.949660343 | 5741.675 | 5767.75  | 26.075  | 0.995479173 | 0.9516   | -1.004 |
| 160385_at   | 1559.3 | 1388.9 | 1459.9  | 1329.6 | 1596.7  | 1657.7 | 1484.1  | 1841.8 | 0.06357976  | 1434.425 | 1645.075 | 210.65  | 0.871951127 | 0.05321  | 1.145  |
| 160386_at   | 454.3  | 908.4  | 726.6   | 636.2  | 641.9   | 809.5  | 755.6   | 830.6  | 0.49149965  | 681.375  | 759.4    | 78.025  | 0.897254411 | 0.4235   | 1.143  |
| 160387_at   | 404.7  | 319    | 379.7   | 391    | 553.7   | 427    | 477.2   | 406.3  | 0.060578932 | 373.6    | 466.05   | 92.45   | 0.801630726 | 0.04551  | 1.244  |
| 160388_at   | 838.3  | 463.1  | 639.9   | 741.9  | 501     | 500.7  | 591.5   | 689.6  | 0.328913557 | 670.8    | 570.7    | 100.1   | 1.175398633 | 0.3629   | -1.158 |
| 160389_r_at | 9.6    | 9.8    | 11.1    | 18.2   | 10      | 9.9    | 11.9    | 9.5    | 0.436971216 | 12.175   | 10.325   | 1.85    | 1.179176755 | 0.4358   | -1.141 |
| 160390_at   | 9.5    | 54.8   | 14.4    | 20.8   | 8.4     | 32.4   | 15.2    | 8      | 0.485254001 | 24.875   | 16       | 8.875   | 1.5546875   | 0.4637   | -1.475 |
| 160391_at   | 726.4  | 1093.2 | 1066.8  | 902.4  | 903.7   | 1014.9 | 1181.6  | 1018.2 | 0.455556029 | 947.2    | 1029.6   | 82.4    | 0.91996892  | 0.4332   | 1.096  |
| 160392_at   | 198.3  | 193.2  | 195.8   | 270.1  | 175.7   | 247.8  | 191.2   | 245.1  | 0.982485452 | 214.35   | 214.95   | 0.6     | 0.997208653 | 0.9896   | -1.002 |
| 160393_at   | 300.1  | 355    | 329.7   | 287    | 261.4   | 387    | 351.8   | 326.2  | 0.674792354 | 317.95   | 331.6    | 13.65   | 0.958835947 | 0.726    | -1.036 |
| 160394_at   | 796    | 655.7  | 755.2   | 681.4  | 512.6   | 716.5  | 638.3   | 700.4  | 0.211626526 | 722.075  | 641.95   | 80.125  | 1.124815017 | 0.2143   | -1.131 |
| 160395_at   | 1827.3 | 1411.8 | 1667.8  | 1420.4 | 1780.7  | 1534.5 | 1638.9  | 1460.8 | 0.864850306 | 1581.825 | 1603.725 | 21.9    | 0.986344292 | 0.8313   | -1.017 |
| 160396_at   | 294.9  | 279    | 292.8   | 254.6  | 273.6   | 284.3  | 230.5   | 291.2  | 0.55332482  | 280.325  | 269.9    | 10.425  | 1.038625417 | 0.544    | -1.041 |
| 160397_at   | 1035.9 | 728.5  | 798     | 954.6  | 688.6   | 902.7  | 794.2   | 823.4  | 0.396635093 | 879.25   | 802.225  | 77.025  | 1.09601421  | 0.4121   | -1.091 |
| 160398_at   | 438.7  | 353.3  | 414.3   | 414.3  | 372.5   | 374.2  | 377.5   | 374.8  | 0.193668094 | 405.15   | 374.75   | 30.4    | 1.081120747 | 0.1597   | -1.078 |
| 160399_r_at | 349.2  | 399.4  | 316.6   | 449.7  | 473.2   | 445    | 408.8   | 388.5  | 0.206607805 | 378.725  | 428.875  | 50.15   | 0.883066161 | 0.1911   | 1.139  |
| 160400_at   | 770.9  | 607.5  | 655     | 692.2  | 572.3   | 659.5  | 609.1   | 631.7  | 0.172092564 | 681.4    | 618.15   | 63.25   | 1.102321443 | 0.1549   | -1.1   |
| 160401_r_at | 8      | 12.1   | 15.2    | 27.2   | 26.3    | 10.1   | 6.6     | 8.7    | 0.674657755 | 15.625   | 12.925   | 2.7     | 1.208897485 | 0.5626   | -1.273 |
| 160402_at   | 9184.9 | 8768.4 | 10395.9 | 7622.8 | 13396.5 | 8157.7 | 10474.4 | 7620.1 | 0.555984351 | 8993     | 9912.175 | 919.175 | 0.907268082 | 0.6062   | -1.081 |
| 160403_at   | 2134.2 | 1580.8 | 1684.7  | 1660.3 | 1601.1  | 1696   | 1665.8  | 1705.1 | 0.49387479  | 1765     | 1667     | 98      | 1.058788242 | 0.4895   | -1.052 |
| 160404_at   | 11.1   | 19.7   | 16.5    | 9      | 10.8    | 9.9    | 14.2    | 6.8    | 0.261540507 | 14.075   | 10.425   | 3.65    | 1.350119904 | 0.2698   | -1.333 |
| 160405_at   | 56.9   | 25.3   | 40.7    | 26.2   | 26.3    | 64.6   | 17.2    | 15.2   | 0.657237155 | 37.275   | 30.825   | 6.45    | 1.209245742 | 0.4451   | -1.365 |
| 160406_at   | 317    | 145    | 236.1   | 303.9  | 215.9   | 330.9  | 215     | 316    | 0.720078097 | 250.5    | 269.45   | 18.95   | 0.929671553 | 0.6683   | -1.102 |
| 160407_at   | 28.5   | 54     | 33.9    | 38.6   | 43.6    | 39.1   | 42.5    | 55.1   | 0.374227823 | 38.75    | 45.075   | 6.325   | 0.859678314 | 0.3077   | 1.187  |
| 160408_at   | 17.9   | 10.1   | 13.4    | 27.1   | 39.2    | 18.8   | 25.2    | 28.5   | 0.104914464 | 17.125   | 27.925   | 10.8    | 0.613249776 | 0.09185  | 1.685  |
| 160409_at   | 194.7  | 183.3  | 232.9   | 180.9  | 281     | 320.4  | 337.4   | 277.2  | 0.001644148 | 197.95   | 304      | 106.05  | 0.651151316 | 0.001278 | 1.538  |
| 160410_at   | 331.9  | 355    | 431.2   | 449.8  | 368.4   | 439.9  | 457.2   | 345.3  | 0.794910664 | 391.975  | 402.7    | 10.725  | 0.973367271 | 0.7879   | -1.029 |
| 160411_at   | 25.3   | 28.2   | 27.7    | 8      | 47.5    | 41.7   | 30.7    | 32.2   | 0.046796231 | 22.3     | 38.025   | 15.725  | 0.586456279 | 0.09978  | 1.877  |
| 160412_at   | 308.9  | 190.5  | 214.8   | 217    | 144.9   | 240.4  | 176.5   | 175.9  | 0.194956961 | 232.8    | 184.425  | 48.375  | 1.262301749 | 0.1663   | -1.262 |
| 160413_at   | 9.3    | 8.8    | 7       | 15.1   | 18.9    | 16.1   | 14.1    | 13.1   | 0.048113974 | 10.05    | 15.55    | 5.5     | 0.646302251 | 0.04131  | 1.591  |
| 160414_at   | 692.5  | 1261.2 | 936.7   | 954.1  | 1011.6  | 1100.8 | 1011.4  | 989.9  | 0.608437649 | 961.125  | 1028.425 | 67.3    | 0.934560128 | 0.5017   | -1.093 |
| 160415_at   | 162.3  | 89.4   | 120     | 132.9  | 78.4    | 117.3  | 100.9   | 139.5  | 0.422831324 | 126.15   | 109.025  | 17.125  | 1.157074066 | 0.4359   | -1.157 |
| 160416_at   | 867.9  | 678.5  | 761.4   | 847.5  | 838.4   | 737.3  | 876.3   | 745.7  | 0.854825479 | 788.825  | 799.425  | 10.6    | 0.98674047  | 0.8369   | -1.015 |
| 160417_at   | 896.9  | 1093.8 | 1160.6  | 1389.4 | 1001    | 1183.7 | 1127.2  | 1220.8 | 0.986597759 | 1135.175 | 1133.175 | 2       | 1.001764952 | 0.9423   | -1.008 |
| 160418_at   | 54.5   | 53.4   | 27.7    | 56.4   | 63.7    | 48     | 77.3    | 82.1   | 0.102295471 | 48       | 67.775   | 19.775  | 0.708225747 | 0.1329   | 1.438  |
| 160419_r_at | 47.2   | 84     | 34      | 62.8   | 106     | 60.6   | 62.3    | 109.2  | 0.161578997 | 57       | 84.525   | 27.525  | 0.674356699 | 0.1555   | 1.507  |
| 160420_r_at | 1295.5 | 1335.6 | 1923.6  | 2733.5 | 796     | 1304.5 | 1247.7  | 1180.5 | 0.129905198 | 1822.05  | 1132.175 | 689.875 | 1.609336013 | 0.07711  | -1.562 |
| 160421_r_at | 383.6  | 433.2  | 646.8   | 476.1  | 563.7   | 535.1  | 634.4   | 652.1  | 0.149029411 | 484.925  | 596.325  | 111.4   | 0.813189117 | 0.1154   | 1.25   |
| 160422_at   | 1088.6 | 1191.9 | 1117.7  | 1051.8 | 1361.5  | 995.1  | 1146.6  | 1166.2 | 0.5353489   | 1112.5   | 1167.35  | 54.85   | 0.953013235 | 0.5582   | -1.044 |
| 160423_at   | 538.5  | 385.8  | 448.6   | 377.1  | 435     | 436.8  | 417.5   | 472.4  | 0.944202892 | 437.5    | 440.425  | 2.925   | 0.993358688 | 0.859    | -1.016 |
| 160424_f_at | 2431.8 | 2227.4 | 2257.3  | 2023.1 | 2401.6  | 2117.3 | 2237.9  | 2010   | 0.72826963  | 2234.9   | 2191.7   | 43.2    | 1.019710727 | 0.7276   | -1.02  |
| 160425_at   | 473.4  | 361.6  | 426.3   | 366.9  | 371.8   | 446    | 403     | 306.7  | 0.548058994 | 407.05   | 381.875  | 25.175  | 1.065924714 | 0.537    | -1.069 |
| 160426_at   | 1250.9 | 1059   | 1185.5  | 1002.9 | 1124.8  | 1168.3 | 1096.5  | 965.1  | 0.635707571 | 1124.575 | 1088.675 | 35.9    | 1.032975865 | 0.6508   | -1.032 |
| 160427_at   | 1909.4 | 1444.2 | 1662.3  | 1679.7 | 1507.3  | 1596.7 | 1420.3  | 1590.6 | 0.232421161 | 1673.9   | 1528.725 | 145.175 | 1.094964758 | 0.2186   | -1.091 |
| 160428_at   | 1660.8 | 1369.6 | 1675    | 1488.2 | 1355.4  | 1584.4 | 1484    | 1533.2 | 0.530490166 | 1548.4   | 1489.25  | 59.15   | 1.039717979 | 0.5488   | -1.038 |
| 160429_at   | 1021.8 | 920.7  | 996.6   | 1047.7 | 990.1   | 846.4  | 888.5   | 970.7  | 0.148537835 | 996.7    | 923.925  | 72.775  | 1.078767216 | 0.1492   | -1.08  |
| 160430_at   | 8240.1 | 7967.1 | 8186.9  | 8622.2 | 7552.7  | 7747.3 | 7873.9  | 8291.8 | 0.111747701 | 8254.075 | 7866.425 | 387.65  | 1.049279056 | 0.1088   | -1.049 |
| 160431_at   | 684.7  | 832.7  | 721.9   | 655.7  | 1286.9  | 614.3  | 886.3   | 660.8  | 0.440070262 | 723.75   | 862.075  | 138.325 | 0.839544123 | 0.4722   | 1.144  |



|             |        |         |         |        |         |        |         |         |             |           |           |         |             |         |        |
|-------------|--------|---------|---------|--------|---------|--------|---------|---------|-------------|-----------|-----------|---------|-------------|---------|--------|
| 160432_at   | 870.1  | 913.3   | 870     | 839.5  | 1065.9  | 674.7  | 794.9   | 801     | 0.671190234 | 873.225   | 834.125   | 39.1    | 1.046875468 | 0.5617  | -1.061 |
| 160433_at   | 256    | 307.5   | 389.6   | 348.7  | 481     | 393.1  | 366     | 384.1   | 0.08099818  | 325.45    | 406.05    | 80.6    | 0.801502278 | 0.08028 | 1.256  |
| 160434_at   | 824.6  | 563.2   | 805     | 755.4  | 501.9   | 673.3  | 610     | 708.2   | 0.183750165 | 737.05    | 623.35    | 113.7   | 1.18240154  | 0.2058  | -1.179 |
| 160435_at   | 525.2  | 423.2   | 577.7   | 515.6  | 402.6   | 486.5  | 587.1   | 456.3   | 0.607768679 | 510.425   | 483.125   | 27.3    | 1.056507115 | 0.5904  | -1.06  |
| 160436_at   | 12.4   | 10.7    | 14.5    | 13.1   | 60      | 20     | 12.7    | 58.5    | 0.137303514 | 12.675    | 37.8      | 25.125  | 0.33531746  | 0.0648  | 2.44   |
| 160437_at   | 115.4  | 180.3   | 139     | 126.9  | 245.8   | 191.9  | 157.5   | 203.5   | 0.044656394 | 140.4     | 199.675   | 59.275  | 0.703142607 | 0.03725 | 1.424  |
| 160438_at   | 43.5   | 43      | 29.9    | 16     | 43.3    | 13.8   | 67      | 46.9    | 0.484228318 | 33.1      | 42.75     | 9.65    | 0.774269006 | 0.6708  | 1.203  |
| 160439_at   | 71     | 126     | 64.4    | 112    | 87.2    | 80.8   | 96.2    | 66.9    | 0.553245299 | 93.35     | 82.775    | 10.575  | 1.127755965 | 0.646   | -1.092 |
| 160440_at   | 1536.3 | 1862.4  | 1275.6  | 1626.2 | 1296.2  | 1490.1 | 1441.8  | 1325.6  | 0.226126356 | 1575.125  | 1388.425  | 186.7   | 1.134468913 | 0.213   | -1.126 |
| 160441_at   | 40.6   | 18.4    | 36.9    | 32.8   | 34.9    | 35.4   | 46.4    | 22.8    | 0.7069157   | 32.175    | 34.875    | 2.7     | 0.922580645 | 0.7035  | -1.097 |
| 160442_at   | 486    | 376.6   | 489.7   | 737.6  | 438.8   | 524.3  | 574.6   | 492.5   | 0.863993654 | 522.475   | 507.55    | 14.925  | 1.02940597  | 0.9802  | -1.004 |
| 160443_at   | 1.8    | 2.8     | 4.4     | 1.6    | 3.6     | 2.4    | 4.3     | 2.4     | 0.534942813 | 2.65      | 3.175     | 0.525   | 0.834645669 | 0.4239  | 1.259  |
| 160444_at   | 996.9  | 807.2   | 1039.7  | 838.4  | 987     | 942.9  | 899.2   | 963.9   | 0.672727996 | 920.55    | 948.25    | 27.7    | 0.970788294 | 0.6141  | -1.036 |
| 160445_at   | 701.9  | 937.7   | 811.4   | 871.5  | 440.4   | 824.7  | 590.6   | 766.2   | 0.144810912 | 830.625   | 655.475   | 175.15  | 1.267210801 | 0.1443  | -1.297 |
| 160446_at   | 32.8   | 17      | 10.5    | 27.3   | 63      | 26.6   | 15      | 60.1    | 0.212586554 | 21.9      | 41.175    | 19.275  | 0.531876138 | 0.2401  | 1.753  |
| 160447_at   | 992.3  | 834     | 914.2   | 946.2  | 853.3   | 849    | 914.7   | 829.1   | 0.179256389 | 921.675   | 861.525   | 60.15   | 1.069818055 | 0.1693  | -1.068 |
| 160448_at   | 1186.2 | 1060.4  | 1076.3  | 1001   | 1230.4  | 918.8  | 990.9   | 871.1   | 0.42395175  | 1080.975  | 1002.8    | 78.175  | 1.077956721 | 0.364   | -1.086 |
| 160449_at   | 613    | 648.8   | 538.4   | 608.8  | 693.7   | 650.7  | 614.7   | 775.9   | 0.105521508 | 602.25    | 683.75    | 81.5    | 0.880804388 | 0.09597 | 1.134  |
| 160450_at   | 1829.5 | 1533.5  | 1736.6  | 1682.8 | 1603    | 1597.4 | 1765.3  | 1370.4  | 0.319159725 | 1695.6    | 1584.025  | 111.575 | 1.070437651 | 0.3162  | -1.073 |
| 160451_at   | 1524   | 1208.8  | 1480.2  | 1420.1 | 1059    | 1212.9 | 1148.3  | 1044.4  | 0.01631537  | 1408.275  | 1116.15   | 292.125 | 1.261725575 | 0.01027 | -1.259 |
| 160452_at   | 8.8    | 9.2     | 8.1     | 5.4    | 17.2    | 8      | 8.1     | 6.9     | 0.444201844 | 7.875     | 10.05     | 2.175   | 0.78358209  | 0.4491  | 1.214  |
| 160453_at   | 563.5  | 589.1   | 576.8   | 479.4  | 373.5   | 520.7  | 419.1   | 546.1   | 0.128637417 | 552.2     | 464.85    | 87.35   | 1.187910079 | 0.1244  | -1.198 |
| 160454_at   | 240.9  | 257.2   | 332.1   | 380.9  | 256.8   | 278.9  | 307.2   | 332.7   | 0.81963256  | 302.775   | 293.9     | 8.875   | 1.030197346 | 0.8928  | -1.017 |
| 160455_s_at | 5697.4 | 4350.3  | 5369.8  | 4765.9 | 4393.8  | 4703.7 | 5193.2  | 5097.6  | 0.598400783 | 5045.85   | 4847.075  | 198.775 | 1.041009268 | 0.6241  | -1.038 |
| 160456_at   | 121.5  | 110     | 105.4   | 104.4  | 114.3   | 135.7  | 110.8   | 87.4    | 0.879194722 | 110.325   | 112.05    | 1.725   | 0.984605087 | 0.9577  | -1.005 |
| 160457_at   | 7676.8 | 6536.9  | 7848.6  | 7655.3 | 6591.6  | 6692.6 | 7341.6  | 6411.6  | 0.120944367 | 7429.4    | 6759.35   | 670.05  | 1.099129354 | 0.1194  | -1.098 |
| 160458_at   | 1328.9 | 1174.9  | 1180.1  | 1205   | 488.1   | 1035.2 | 690.6   | 801.2   | 0.021163622 | 1222.225  | 753.775   | 468.45  | 1.621471925 | 0.01757 | -1.679 |
| 160459_r_at | 11.2   | 11.5    | 11.1    | 23.7   | 14.2    | 12.4   | 15.5    | 19.8    | 0.766604945 | 14.375    | 15.475    | 1.1     | 0.928917609 | 0.6016  | 1.122  |
| 160460_at   | 726.6  | 872.1   | 831.4   | 898    | 707.2   | 764    | 759.7   | 812.2   | 0.164517718 | 832.025   | 760.775   | 71.25   | 1.093654497 | 0.1613  | -1.091 |
| 160461_f_at | 3042.6 | 2751.2  | 3301.4  | 2791.2 | 4723.1  | 2424.7 | 2788.4  | 2484.9  | 0.825239092 | 2971.6    | 3105.275  | 133.675 | 0.956952283 | 0.9666  | -1.007 |
| 160462_f_at | 2140.8 | 2418.3  | 2548.9  | 2299.9 | 2911    | 2082.4 | 1864.4  | 2635.3  | 0.938140061 | 2351.975  | 2373.275  | 21.3    | 0.99102506  | 0.967   | -1.005 |
| 160463_at   | 297.8  | 316.2   | 284.6   | 268.2  | 207.1   | 245.3  | 247.4   | 361.3   | 0.495310777 | 291.7     | 265.275   | 26.425  | 1.099613609 | 0.3851  | -1.122 |
| 160464_s_at | 567.4  | 533.4   | 566.8   | 489.7  | 479.2   | 547    | 571.1   | 435.3   | 0.428629026 | 539.325   | 508.15    | 31.175  | 1.061349995 | 0.4066  | -1.066 |
| 160465_at   | 187.9  | 192.3   | 195.6   | 241.1  | 163.9   | 185.6  | 195.3   | 246.6   | 0.77755173  | 204.225   | 197.85    | 6.375   | 1.03222138  | 0.7271  | -1.038 |
| 160466_at   | 366.7  | 654.5   | 634.2   | 622    | 660.6   | 595.3  | 653.1   | 545.5   | 0.57775485  | 569.35    | 613.625   | 44.275  | 0.927846812 | 0.5256  | -1.103 |
| 160467_at   | 46     | 23.9    | 20.6    | 14.8   | 22.2    | 18.8   | 40.3    | 16.4    | 0.835015108 | 26.325    | 24.425    | 1.9     | 1.07778915  | 0.8736  | -1.053 |
| 160468_at   | 1402.8 | 1253.1  | 1182.7  | 1476.8 | 1062.6  | 1398.7 | 1215.8  | 1341    | 0.487501622 | 1328.85   | 1254.525  | 74.325  | 1.059245531 | 0.4847  | -1.061 |
| 160469_at   | 181.9  | 239.6   | 157     | 135    | 155     | 342.7  | 292.3   | 253.4   | 0.133945808 | 178.375   | 260.85    | 82.475  | 0.68382212  | 0.1362  | 1.436  |
| 160470_at   | 252.9  | 214.2   | 253.4   | 250    | 242     | 236.3  | 284.2   | 297.5   | 0.267193972 | 242.625   | 265       | 22.375  | 0.915566038 | 0.2685  | -1.09  |
| 160471_at   | 1146   | 819.7   | 1126.4  | 1200.6 | 796.2   | 740.1  | 898.6   | 848.1   | 0.053578106 | 1073.175  | 820.75    | 252.425 | 1.307554066 | 0.03614 | -1.297 |
| 160472_r_at | 124.9  | 150.1   | 212.3   | 242.5  | 101.6   | 146.6  | 102.2   | 138.2   | 0.109868386 | 182.45    | 122.15    | 60.3    | 1.493655342 | 0.0801  | -1.464 |
| 160473_at   | 312.1  | 382.6   | 330.2   | 304.3  | 489.4   | 332.6  | 398.8   | 342.2   | 0.212628273 | 332.3     | 390.75    | 58.45   | 0.850415867 | 0.1828  | 1.167  |
| 160474_at   | 545.5  | 369.8   | 401.8   | 487.3  | 392.5   | 490.4  | 380.3   | 439.4   | 0.61314708  | 451.1     | 425.65    | 25.45   | 1.059790908 | 0.6451  | -1.053 |
| 160475_at   | 661.1  | 610     | 554.4   | 622.1  | 601.5   | 592.7  | 470.7   | 469.1   | 0.128025227 | 611.9     | 533.5     | 78.4    | 1.146954077 | 0.1188  | -1.153 |
| 160476_f_at | 11285  | 11881.3 | 10766.6 | 9517   | 17782.4 | 9081.9 | 11620.4 | 11308.6 | 0.464940268 | 10862.475 | 12448.325 | 1585.85 | 0.872605351 | 0.4911  | 1.115  |
| 160477_at   | 54.8   | 67.2    | 87.6    | 53.2   | 96      | 67.3   | 76      | 67.5    | 0.332775436 | 65.7      | 76.7      | 11      | 0.856584094 | 0.2905  | 1.179  |
| 160478_r_at | 20.6   | 7.5     | 43      | 55.5   | 15.2    | 21.9   | 19.5    | 15.2    | 0.295571498 | 31.65     | 17.95     | 13.7    | 1.763231198 | 0.5008  | -1.389 |
| 160479_at   | 434.7  | 300.9   | 442.9   | 502.9  | 346.2   | 385.7  | 415.4   | 410.4   | 0.535380757 | 420.35    | 389.425   | 30.925  | 1.079411954 | 0.6195  | -1.064 |
| 160480_at   | 407    | 1023.7  | 638.2   | 713.9  | 951.9   | 794.6  | 892.7   | 944.6   | 0.215171383 | 695.7     | 895.95    | 200.25  | 0.776494224 | 0.1705  | 1.354  |
| 160481_at   | 29.2   | 34.3    | 9       | 31.4   | 7.8     | 8.2    | 9       | 5.6     | 0.04873773  | 25.975    | 7.65      | 18.325  | 3.395424837 | 0.0151  | -3.062 |
| 160482_at   | 1097.5 | 1438.2  | 1060.3  | 1357.9 | 1718.7  | 1448.7 | 1590.7  | 1401.3  | 0.046204419 | 1238.475  | 1539.85   | 301.375 | 0.804282885 | 0.04596 | 1.25   |
| 160483_at   | 838.2  | 1109.6  | 690     | 1422.5 | 1154    | 970.4  | 1128.9  | 1503.1  | 0.413726155 | 1015.075  | 1189.1    | 174.025 | 0.853649819 | 0.3547  | 1.201  |
| 160484_at   | 1695.6 | 2526.1  | 2071.6  | 2419.6 | 2581.9  | 2366.8 | 2625.6  | 2169.3  | 0.28823142  | 2178.225  | 2435.9    | 257.675 | 0.894217743 | 0.2743  | 1.128  |
| 160485_r_at | 500.5  | 575.6   | 514.3   | 623.9  | 754.6   | 596.2  | 645.9   | 455.4   | 0.431078315 | 553.575   | 613.025   | 59.45   | 0.9030219   | 0.4737  | -1.094 |
| 160486_at   | 603.7  | 597.7   | 523.5   | 547    | 639.3   | 516.6  | 647.9   | 508.3   | 0.824170523 | 567.975   | 578.025   | 10.05   | 0.982613209 | 0.8686  | -1.013 |
| 160487_at   | 123.7  | 110.6   | 141.6   | 125.7  | 172.3   | 96     | 91      | 116.9   | 0.764279    | 125.4     | 119.05    | 6.35    | 1.053338933 | 0.616   | -1.084 |



|             |        |        |        |        |        |        |        |        |             |          |          |         |             |          |        |
|-------------|--------|--------|--------|--------|--------|--------|--------|--------|-------------|----------|----------|---------|-------------|----------|--------|
| 160488_at   | 296.1  | 328    | 330.7  | 395.6  | 311.6  | 327.9  | 297.7  | 399.1  | 0.912396203 | 337.6    | 334.075  | 3.525   | 1.010551523 | 0.9018   | -1.011 |
| 160489_at   | 36.6   | 37.7   | 40.8   | 54.8   | 38.6   | 35.5   | 37.9   | 43.9   | 0.485344538 | 42.475   | 38.975   | 3.5     | 1.089801155 | 0.4894   | -1.078 |
| 160490_at   | 408.1  | 396.7  | 377.7  | 434.3  | 337.1  | 405.4  | 446.6  | 417.1  | 0.923269624 | 404.2    | 401.55   | 2.65    | 1.006599427 | 0.8799   | -1.011 |
| 160491_at   | 119.9  | 142.3  | 160    | 199.3  | 113.6  | 162.8  | 182.9  | 151.2  | 0.905627787 | 155.375  | 152.625  | 2.75    | 1.018018018 | 0.9201   | -1.016 |
| 160492_at   | 1319.9 | 911.2  | 1122.4 | 1073.3 | 1078.4 | 1030.4 | 944.8  | 1094.2 | 0.485166024 | 1106.7   | 1036.95  | 69.75   | 1.067264574 | 0.5107   | -1.06  |
| 160493_at   | 5886.5 | 5467.2 | 5893.5 | 5348.7 | 6419.6 | 5508.9 | 5618.1 | 5477.7 | 0.70168876  | 5648.975 | 5756.075 | 107.1   | 0.981393571 | 0.7105   | -1.018 |
| 160494_at   | 95.3   | 113.5  | 170.2  | 148.2  | 166.3  | 100    | 194.1  | 178.1  | 0.338680437 | 131.8    | 159.625  | 27.825  | 0.8256852   | 0.3839   | 1.205  |
| 160495_at   | 104.7  | 95.1   | 79     | 98     | 119.8  | 138    | 115    | 158.7  | 0.021210437 | 94.2     | 132.875  | 38.675  | 0.708936971 | 0.0114   | 1.407  |
| 160496_s_at | 2143.7 | 1975.8 | 1928.6 | 1997   | 1295.9 | 1453.4 | 1361   | 1616.7 | 0.000802406 | 2011.275 | 1431.75  | 579.525 | 1.404766894 | 0.000649 | -1.409 |
| 160497_at   | 867.5  | 684.9  | 832.6  | 861.5  | 665.1  | 805.4  | 806.3  | 811.9  | 0.507238884 | 811.625  | 772.175  | 39.45   | 1.051089455 | 0.5346   | -1.05  |
| 160498_at   | 311.6  | 512.1  | 471.3  | 562.7  | 685    | 644.8  | 637.1  | 803    | 0.016457235 | 464.425  | 692.475  | 228.05  | 0.670674032 | 0.02476  | 1.52   |
| 160499_at   | 7410.5 | 5402.9 | 6150.1 | 6254.5 | 6096.7 | 5705   | 6046.4 | 6526.7 | 0.662355932 | 6304.5   | 6093.7   | 210.8   | 1.034593104 | 0.6969   | -1.029 |
| 160500_at   | 59.7   | 103.7  | 84.9   | 68.2   | 37.1   | 44.8   | 30.1   | 41.4   | 0.019673435 | 79.125   | 38.35    | 40.775  | 2.063233377 | 0.003059 | -2.04  |
| 160501_at   | 930.7  | 627.9  | 937.8  | 821.9  | 651    | 626.1  | 646.3  | 461.3  | 0.040594368 | 829.575  | 596.175  | 233.4   | 1.391495786 | 0.03951  | -1.388 |
| 160502_at   | 257.4  | 206.7  | 267.4  | 301.4  | 218.1  | 302.8  | 289.6  | 276.9  | 0.632674617 | 258.225  | 271.85   | 13.625  | 0.949880449 | 0.6401   | -1.054 |
| 160503_at   | 2371.9 | 2358.9 | 2634.3 | 2449.2 | 1839.7 | 2346.8 | 2236   | 2938.4 | 0.65955157  | 2453.575 | 2340.225 | 113.35  | 1.048435514 | 0.5669   | -1.062 |
| 160504_at   | 2.6    | 1.6    | 2.7    | 1.3    | 1.3    | 1.8    | 7.6    | 2.2    | 0.488247421 | 2.05     | 3.225    | 1.175   | 0.635658915 | 0.5946   | 1.272  |
| 160505_at   | 13     | 22.6   | 31.4   | 15.8   | 42.2   | 12.6   | 20.7   | 33.4   | 0.437903195 | 20.7     | 27.225   | 6.525   | 0.760330579 | 0.5116   | 1.26   |
| 160506_at   | 102.8  | 152    | 132    | 29     | 272.1  | 165.5  | 191.4  | 359.1  | 0.038683576 | 103.95   | 247.025  | 143.075 | 0.420807611 | 0.05577  | 2.681  |
| 160507_at   | 571.4  | 440.3  | 492.5  | 468    | 392.1  | 422.5  | 450.6  | 447.3  | 0.101583943 | 493.05   | 428.125  | 64.925  | 1.151649635 | 0.07527  | -1.148 |
| 160508_at   | 19.7   | 21.3   | 15.6   | 33.6   | 26.8   | 26.2   | 27.9   | 33.5   | 0.223551929 | 22.55    | 28.6     | 6.05    | 0.788461538 | 0.1588   | 1.315  |
| 160509_at   | 65.7   | 63.2   | 37.5   | 95.6   | 50.9   | 53.9   | 67.7   | 66.7   | 0.676846363 | 65.5     | 59.8     | 5.7     | 1.095317726 | 0.8327   | -1.046 |
| 160510_f_at | 18.5   | 7      | 7.9    | 11.5   | 3.5    | 8.2    | 10.1   | 2.7    | 0.165136939 | 11.225   | 6.125    | 5.1     | 1.832653061 | 0.1309   | -1.972 |
| 160511_at   | 1713.9 | 2301.3 | 2320.4 | 2252.4 | 3402.7 | 2636.4 | 2777.3 | 2605.5 | 0.025737455 | 2147     | 2855.475 | 708.475 | 0.751888915 | 0.02407  | 1.332  |
| 160512_at   | 830.6  | 733.3  | 757.7  | 888.5  | 846.3  | 705.2  | 841.2  | 936.2  | 0.635800291 | 802.525  | 832.225  | 29.7    | 0.964312536 | 0.658    | -1.035 |
| 160513_at   | 500    | 789.4  | 812.2  | 788.5  | 577.4  | 780.6  | 583.4  | 742.1  | 0.593979714 | 722.525  | 670.875  | 51.65   | 1.076989007 | 0.6622   | -1.067 |
| 160514_at   | 824.5  | 841.4  | 818.3  | 817    | 1069.7 | 741    | 893.3  | 859.8  | 0.405795476 | 825.3    | 890.95   | 65.65   | 0.926314608 | 0.4039   | -1.07  |
| 160515_at   | 665.6  | 537.7  | 656.9  | 493.3  | 491.4  | 535.9  | 620.1  | 531.7  | 0.430113053 | 588.375  | 544.775  | 43.6    | 1.080033041 | 0.4455   | -1.075 |
| 160516_at   | 1080.2 | 1392.7 | 1239.5 | 1177.3 | 1512.7 | 1397.1 | 1608.6 | 1427.1 | 0.019692366 | 1222.425 | 1486.375 | 263.95  | 0.822420318 | 0.01845  | 1.219  |
| 160517_at   | 820.1  | 886.3  | 879.5  | 638.5  | 513.1  | 917.1  | 463    | 308.3  | 0.143726111 | 806.1    | 550.375  | 255.725 | 1.464637747 | 0.1065   | -1.57  |
| 160518_at   | 1784.4 | 1409.7 | 1722.5 | 1612.5 | 1566.6 | 1468.9 | 1663.1 | 1674.3 | 0.699329399 | 1632.275 | 1593.225 | 39.05   | 1.024510035 | 0.7318   | -1.022 |
| 160519_at   | 1983.9 | 2108.4 | 1778.1 | 1839.6 | 2177.4 | 2169.4 | 2301.4 | 2037.9 | 0.040826882 | 1927.5   | 2171.525 | 244.025 | 0.887625056 | 0.03844  | 1.128  |
| 160520_at   | 1652.2 | 2212.4 | 2055   | 1932.1 | 1297.7 | 1795.8 | 1783.2 | 1964.1 | 0.224938047 | 1962.925 | 1710.2   | 252.725 | 1.147775114 | 0.2387   | -1.155 |
| 160521_at   | 454.9  | 347.2  | 386.1  | 281.2  | 291.3  | 363.9  | 357.3  | 376.9  | 0.648782157 | 367.35   | 347.35   | 20      | 1.057578811 | 0.7068   | -1.047 |
| 160522_at   | 5677   | 5377.1 | 6253.9 | 6075.3 | 5838.8 | 6635.9 | 7205   | 6420.6 | 0.101746627 | 5845.825 | 6525.075 | 679.25  | 0.89590158  | 0.09622  | -1.115 |
| 160523_at   | 66.2   | 13.2   | 32.7   | 79.5   | 12.1   | 44.4   | 9.7    | 21.7   | 0.196615825 | 47.9     | 21.975   | 25.925  | 2.179749716 | 0.2065   | -2.121 |
| 160524_at   | 276.7  | 265.1  | 405.2  | 167.9  | 388.6  | 366.1  | 288.6  | 97     | 0.941171239 | 278.725  | 285.075  | 6.35    | 0.97772516  | 0.8839   | -1.058 |
| 160525_f_at | 5.6    | 4.1    | 3.6    | 2.9    | 10.4   | 3      | 2.9    | 13.2   | 0.295908045 | 4.05     | 7.375    | 3.325   | 0.549152542 | 0.3738   | 1.504  |
| 160526_s_at | 121.3  | 91.9   | 96.8   | 121    | 80.9   | 104.7  | 112.4  | 120.1  | 0.789015703 | 107.75   | 104.525  | 3.225   | 1.030853863 | 0.7772   | -1.034 |
| 160527_at   | 172    | 201.9  | 198.8  | 183    | 225.7  | 186.6  | 224.4  | 194.6  | 0.180407634 | 188.925  | 207.825  | 18.9    | 0.909058102 | 0.1782   | 1.098  |
| 160528_at   | 5.9    | 30.8   | 9.4    | 12.9   | 25     | 6.7    | 11.3   | 24.5   | 0.778925434 | 14.75    | 16.875   | 2.125   | 0.874074074 | 0.7101   | 1.202  |
| 160529_r_at | 1518.3 | 1165.3 | 1359.8 | 1797.1 | 2026.7 | 1467.1 | 1523.5 | 1231.3 | 0.651255065 | 1460.125 | 1562.15  | 102.025 | 0.93468937  | 0.6605   | -1.066 |
| 160530_at   | 842    | 833    | 757.4  | 808.3  | 518.4  | 882    | 681.9  | 910.1  | 0.552072889 | 810.175  | 748.1    | 62.075  | 1.082976875 | 0.4664   | -1.109 |
| 160531_at   | 2537.2 | 2089.6 | 2606.3 | 2571.8 | 2318.3 | 2203.6 | 2135.4 | 2266.8 | 0.166852186 | 2451.225 | 2231.025 | 220.2   | 1.098699028 | 0.151    | -1.095 |
| 160532_at   | 3978   | 4335.5 | 4479.8 | 4088.6 | 3681.4 | 3906.5 | 4212.2 | 3530.6 | 0.086662467 | 4220.475 | 3832.675 | 387.8   | 1.101182594 | 0.08283  | -1.102 |
| 160533_r_at | 582.2  | 597.9  | 782.1  | 483.3  | 786.4  | 637.5  | 809.1  | 633.8  | 0.229416826 | 611.375  | 716.7    | 105.325 | 0.853041719 | 0.2089   | 1.182  |
| 160534_at   | 1322   | 1127.4 | 1242.6 | 1247.6 | 1090.2 | 1144.7 | 1089.1 | 1221.8 | 0.104194221 | 1234.9   | 1136.45  | 98.45   | 1.086629416 | 0.1013   | -1.086 |
| 160535_at   | 749.3  | 1124.5 | 997.2  | 1023.4 | 1025.2 | 1048.3 | 1199.7 | 1119.9 | 0.227230647 | 973.6    | 1098.275 | 124.675 | 0.886481073 | 0.2192   | 1.138  |
| 160536_at   | 459.7  | 461.7  | 439.2  | 482    | 379.8  | 498.6  | 420.2  | 420.3  | 0.31002021  | 460.65   | 429.725  | 30.925  | 1.071964629 | 0.2618   | -1.077 |
| 160537_at   | 8      | 15.4   | 6      | 9.8    | 5.7    | 24.7   | 7.2    | 7.9    | 0.76339361  | 9.8      | 11.375   | 1.575   | 0.861538462 | 0.9506   | -1.025 |
| 160538_at   | 4612.7 | 4686.1 | 5344.4 | 4478.3 | 6092.3 | 4044   | 4781.8 | 5249.2 | 0.606911582 | 4780.375 | 5041.825 | 261.45  | 0.948143777 | 0.6531   | -1.046 |
| 160539_at   | 421.7  | 512.2  | 572.8  | 716.5  | 279    | 583.9  | 401.4  | 406.4  | 0.168193845 | 555.8    | 417.675  | 138.125 | 1.330699707 | 0.1584   | -1.351 |
| 160540_at   | 900.9  | 935.6  | 909    | 1000.9 | 963.1  | 1059.9 | 965.4  | 1037   | 0.083375092 | 936.6    | 1006.35  | 69.75   | 0.930690118 | 0.0809   | -1.074 |
| 160541_at   | 106.8  | 120.3  | 130.9  | 101.3  | 102.4  | 147.5  | 103.9  | 131.6  | 0.633985424 | 114.825  | 121.35   | 6.525   | 0.946229913 | 0.6694   | -1.049 |
| 160542_at   | 402.1  | 511.9  | 542.5  | 577.9  | 492.1  | 503.7  | 468.9  | 528.7  | 0.811405573 | 508.6    | 498.35   | 10.25   | 1.020567874 | 0.8878   | -1.012 |
| 160543_at   | 5487.7 | 5591.6 | 5578.4 | 5945.8 | 4789.6 | 5460.6 | 5664.8 | 5294.1 | 0.166672433 | 5650.875 | 5302.275 | 348.6   | 1.065745364 | 0.1556   | -1.067 |



|             |        |        |        |        |         |        |        |        |             |          |          |          |             |          |        |
|-------------|--------|--------|--------|--------|---------|--------|--------|--------|-------------|----------|----------|----------|-------------|----------|--------|
| 160544_at   | 383.1  | 330.5  | 496.2  | 568.5  | 358.8   | 321.6  | 296.6  | 446.5  | 0.219073726 | 444.575  | 355.875  | 88.7     | 1.249244819 | 0.2105   | -1.236 |
| 160545_at   | 1888.4 | 1938.2 | 2166.9 | 1766.7 | 1849.9  | 1978.4 | 1990.3 | 2271.4 | 0.524751183 | 1940.05  | 2022.5   | 82.45    | 0.959233622 | 0.5178   | -1.042 |
| 160546_at   | 143.2  | 177.1  | 250.9  | 156.5  | 264.9   | 204.9  | 266.5  | 302    | 0.049213956 | 181.925  | 259.575  | 77.65    | 0.70085717  | 0.04614  | 1.447  |
| 160547_s_at | 1553.9 | 2465.3 | 2595.1 | 1529.4 | 2474.1  | 2841.1 | 2478.4 | 2191.3 | 0.21514399  | 2035.925 | 2496.225 | 460.3    | 0.815601558 | 0.1829   | 1.259  |
| 160548_at   | 168    | 139.5  | 149.4  | 249.3  | 203     | 190.7  | 200.2  | 294.9  | 0.238617498 | 176.55   | 222.2    | 45.65    | 0.794554455 | 0.1932   | 1.272  |
| 160549_at   | 2845.2 | 3152   | 2951.7 | 3106.6 | 3088.6  | 3192.5 | 2750.6 | 3608.3 | 0.486108063 | 3013.875 | 3160     | 146.125  | 0.953757911 | 0.5002   | -1.044 |
| 160550_i_at | 2546.5 | 2117.5 | 2014.8 | 2438.6 | 1771.5  | 1759.2 | 1625.3 | 2152.2 | 0.037989183 | 2279.35  | 1827.05  | 452.3    | 1.247557538 | 0.03483  | -1.249 |
| 160551_at   | 4104   | 3284.1 | 4003.6 | 4194.6 | 3556    | 3122.8 | 3971   | 3304.1 | 0.192406951 | 3896.575 | 3488.475 | 408.1    | 1.116985216 | 0.2002   | -1.116 |
| 160552_at   | 1357.1 | 1231.4 | 1508.2 | 1404.9 | 2128.4  | 1356.4 | 1935.5 | 863.9  | 0.548618775 | 1375.4   | 1571.05  | 195.65   | 0.875465453 | 0.7232   | -1.081 |
| 160553_at   | 36.7   | 35.7   | 34.5   | 96.7   | 130.8   | 74.3   | 85     | 95.7   | 0.060957038 | 50.9     | 96.45    | 45.55    | 0.527734578 | 0.04042  | 2.061  |
| 160554_at   | 1290.6 | 1005.9 | 900.4  | 1596.8 | 1297.9  | 1204.4 | 1107   | 1420.7 | 0.74547388  | 1198.425 | 1257.5   | 59.075   | 0.953021869 | 0.6379   | -1.071 |
| 160555_r_at | 6305.4 | 7897.8 | 7990   | 5988.8 | 11638   | 6798.8 | 8986.3 | 6784.5 | 0.296705665 | 7045.5   | 8551.9   | 1506.4   | 0.823852009 | 0.2829   | 1.193  |
| 160556_at   | 1124   | 911.4  | 874.7  | 791.4  | 1126.3  | 942.3  | 921.1  | 822.4  | 0.781009588 | 925.375  | 953.025  | 27.65    | 0.97098712  | 0.7606   | -1.032 |
| 160557_at   | 903.7  | 949.9  | 1114.8 | 941.5  | 952.4   | 1029.1 | 938.5  | 987.9  | 0.992645721 | 977.475  | 976.975  | 0.5      | 1.000511784 | 0.9682   | -1.002 |
| 160558_at   | 1263.3 | 1348.1 | 1357.7 | 1157   | 1291.7  | 1490.1 | 1548   | 1708.5 | 0.071490512 | 1281.525 | 1509.575 | 228.05   | 0.848930991 | 0.05815  | 1.174  |
| 160559_at   | 158.1  | 160    | 180.1  | 228.9  | 183     | 154.5  | 233.1  | 143.5  | 0.904450623 | 181.775  | 178.525  | 3.25     | 1.018204733 | 0.865    | -1.025 |
| 160560_at   | 3.2    | 2.9    | 11.9   | 18.9   | 3.6     | 8.8    | 20.4   | 19.1   | 0.527392566 | 9.225    | 12.975   | 3.75     | 0.710982659 | 0.4951   | 1.569  |
| 160561_at   | 4840.6 | 6688.9 | 5695.7 | 4526.4 | 14171.6 | 6468.5 | 9047.3 | 7156.9 | 0.115845751 | 5437.9   | 9211.075 | 3773.175 | 0.590365403 | 0.0457   | 1.633  |
| 160562_at   | 4153.8 | 3035.6 | 3547   | 3198.7 | 3237    | 3161.3 | 3298.1 | 3543.3 | 0.544869712 | 3483.775 | 3309.925 | 173.85   | 1.052523849 | 0.5635   | -1.046 |
| 160563_at   | 107.5  | 93.1   | 112.2  | 103.8  | 100.4   | 127.5  | 87.9   | 81.4   | 0.681740642 | 104.15   | 99.3     | 4.85     | 1.048841893 | 0.5889   | -1.062 |
| 160564_at   | 161.2  | 65.6   | 50.6   | 53.9   | 43.7    | 57     | 58.2   | 153.9  | 0.90360446  | 82.825   | 78.2     | 4.625    | 1.059143223 | 0.8722   | -1.067 |
| 160565_at   | 49.6   | 23.1   | 11.8   | 35.8   | 38.9    | 20.7   | 68.4   | 28.2   | 0.525433723 | 30.075   | 39.05    | 8.975    | 0.770166453 | 0.4959   | 1.338  |
| 160566_at   | 28.1   | 13.4   | 10.7   | 30     | 36.3    | 36.7   | 13.9   | 45.5   | 0.188611672 | 20.55    | 33.1     | 12.55    | 0.620845921 | 0.2391   | 1.626  |
| 160567_at   | 219.7  | 199.8  | 192.5  | 261.1  | 192.8   | 211    | 216.5  | 296.3  | 0.709385845 | 218.275  | 229.15   | 10.875   | 0.952542003 | 0.7295   | -1.043 |
| 160568_at   | 3532   | 3484.2 | 4189.7 | 3731.6 | 5066.1  | 4110.3 | 4771.6 | 4022.9 | 0.052281612 | 3734.375 | 4492.725 | 758.35   | 0.831204892 | 0.04049  | 1.201  |
| 160569_at   | 3983.6 | 3367.5 | 4026.3 | 3797.4 | 4598.5  | 3629.6 | 4051.3 | 3968.4 | 0.329212762 | 3793.7   | 4061.95  | 268.25   | 0.93396029  | 0.332    | -1.069 |
| 160570_at   | 16.9   | 12.7   | 12.6   | 15.1   | 6.5     | 11.9   | 17.2   | 17.5   | 0.726774836 | 14.325   | 13.275   | 1.05     | 1.079096045 | 0.5847   | -1.15  |
| 160571_at   | 2652.8 | 1996.7 | 2358.3 | 2428.9 | 2819.4  | 2627.9 | 3074.8 | 2448.5 | 0.091627577 | 2359.175 | 2742.65  | 383.475  | 0.860180847 | 0.09478  | 1.164  |
| 160572_at   | 228.6  | 211.2  | 261.4  | 238    | 247.4   | 195.1  | 229.7  | 262.8  | 0.955365895 | 234.8    | 233.75   | 1.05     | 1.004491979 | 0.9257   | -1.008 |
| 160573_at   | 682.5  | 657.3  | 660.8  | 668.1  | 450.2   | 845    | 496    | 609.5  | 0.503137473 | 667.175  | 600.175  | 67       | 1.111634107 | 0.3676   | -1.146 |
| 160574_at   | 194.6  | 211.7  | 146.5  | 173.1  | 220.4   | 212.9  | 196.7  | 208.6  | 0.137245688 | 181.475  | 209.65   | 28.175   | 0.865609349 | 0.1154   | 1.165  |
| 160575_at   | 2072.5 | 2275   | 2030.5 | 2177   | 2111.8  | 1963.1 | 2431.2 | 2272.1 | 0.649474101 | 2138.75  | 2194.55  | 55.8     | 0.974573375 | 0.6711   | -1.024 |
| 160576_at   | 131.8  | 101    | 91.1   | 118.8  | 125.7   | 74.1   | 118    | 148.4  | 0.757889608 | 110.675  | 116.55   | 5.875    | 0.94959245  | 0.8616   | -1.031 |
| 160577_at   | 442.7  | 461.6  | 560.8  | 471    | 612.9   | 478.7  | 526    | 460.4  | 0.442981343 | 484.025  | 519.5    | 35.475   | 0.931713186 | 0.4356   | -1.071 |
| 160578_at   | 481.1  | 657.1  | 588.1  | 483.1  | 615.9   | 487.4  | 517.5  | 515.1  | 0.734552105 | 552.35   | 533.975  | 18.375   | 1.034411723 | 0.7638   | -1.029 |
| 160579_at   | 96.9   | 107.8  | 90.7   | 59     | 122.8   | 142.9  | 114.4  | 119.7  | 0.031655449 | 88.6     | 124.95   | 36.35    | 0.709083633 | 0.0414   | 1.44   |
| 160580_at   | 38.5   | 77.6   | 49.2   | 57.4   | 47.2    | 81.1   | 85.4   | 43.4   | 0.557142402 | 55.675   | 64.275   | 8.6      | 0.866199922 | 0.5921   | 1.139  |
| 160581_at   | 296.3  | 309.9  | 397    | 424.7  | 292.9   | 337.6  | 337.9  | 387.9  | 0.650826521 | 356.975  | 339.075  | 17.9     | 1.052790681 | 0.6898   | -1.045 |
| 160582_at   | 230.5  | 196.6  | 248.4  | 252    | 393.1   | 287.1  | 508.3  | 382.9  | 0.033408022 | 231.875  | 392.85   | 160.975  | 0.590238004 | 0.007652 | 1.668  |
| 160583_at   | 110.7  | 121    | 88.7   | 81.2   | 105.8   | 107.2  | 126.4  | 113.9  | 0.27606747  | 100.4    | 113.325  | 12.925   | 0.885947496 | 0.2437   | 1.14   |
| 160584_at   | 111.9  | 106.7  | 133.3  | 75.6   | 89.3    | 133.3  | 165.6  | 82     | 0.661587687 | 106.875  | 117.55   | 10.675   | 0.90918758  | 0.73     | -1.077 |
| 160585_at   | 244    | 149    | 185.1  | 229    | 131.7   | 143.8  | 125.5  | 218.3  | 0.174147585 | 201.775  | 154.825  | 46.95    | 1.3032456   | 0.1577   | -1.313 |
| 160586_r_at | 13.9   | 16.9   | 19.5   | 9.9    | 7       | 13.5   | 13.8   | 12.8   | 0.259542192 | 15.05    | 11.775   | 3.275    | 1.278131635 | 0.2918   | -1.285 |
| 160587_at   | 219.9  | 231.4  | 278.9  | 212.6  | 265.6   | 208.5  | 291    | 157.6  | 0.886927339 | 235.7    | 230.675  | 5.025    | 1.021783895 | 0.7838   | -1.044 |
| 160588_at   | 495.2  | 518.3  | 491.4  | 587.1  | 522.9   | 526    | 440.3  | 409.2  | 0.240975875 | 523      | 474.6    | 48.4     | 1.101980615 | 0.2293   | -1.106 |
| 160589_at   | 215.9  | 112.4  | 134.2  | 226.9  | 121.6   | 140.9  | 134    | 151.6  | 0.309393909 | 172.35   | 137.025  | 35.325   | 1.257799672 | 0.3363   | -1.207 |
| 160590_r_at | 364.9  | 497.4  | 471.1  | 550.9  | 692.7   | 430.3  | 563.5  | 449.9  | 0.420483993 | 471.075  | 534.1    | 63.025   | 0.881997753 | 0.4331   | 1.125  |
| 160591_at   | 128.5  | 145.4  | 174.1  | 132.8  | 74.9    | 87.6   | 140.9  | 157.2  | 0.245641532 | 145.2    | 115.15   | 30.05    | 1.26096396  | 0.2065   | -1.313 |
| 160592_at   | 375.4  | 449.1  | 442.9  | 543.5  | 371.1   | 379.1  | 249.1  | 489.3  | 0.233311129 | 452.725  | 372.15   | 80.575   | 1.216512159 | 0.2235   | -1.24  |
| 160593_at   | 1195.8 | 1147.9 | 1294.9 | 1520.6 | 1501.9  | 1156.7 | 1139.8 | 1227.9 | 0.787610059 | 1289.8   | 1256.575 | 33.225   | 1.026440921 | 0.776    | -1.027 |
| 160594_at   | 76.6   | 77.9   | 61     | 74.9   | 87.6    | 104.6  | 118.8  | 119.8  | 0.011325993 | 72.6     | 107.7    | 35.1     | 0.674094708 | 0.005623 | 1.479  |
| 160595_at   | 271.7  | 334.1  | 401.1  | 274.8  | 299.8   | 310.4  | 400.2  | 315.8  | 0.781711102 | 320.425  | 331.55   | 11.125   | 0.966445483 | 0.7337   | -1.041 |
| 160596_at   | 367.5  | 273.1  | 312.2  | 250.7  | 285.3   | 276    | 304.5  | 326.2  | 0.922769361 | 300.875  | 298      | 2.875    | 1.009647651 | 0.9909   | -1.001 |
| 160597_at   | 246.6  | 207.8  | 224.2  | 232.1  | 168.1   | 245.7  | 176.5  | 191.8  | 0.165630526 | 227.675  | 195.525  | 32.15    | 1.164429101 | 0.1287   | -1.175 |
| 160598_at   | 156.9  | 251.7  | 195.7  | 147.4  | 245.4   | 205.6  | 238.3  | 297.6  | 0.103415882 | 187.925  | 246.725  | 58.8     | 0.761677982 | 0.09261  | 1.331  |
| 160599_r_at | 904.4  | 811.6  | 1033.1 | 765    | 1370.7  | 792.8  | 1139.4 | 884    | 0.303007808 | 878.525  | 1046.725 | 168.2    | 0.839308319 | 0.3009   | 1.172  |



|             |        |        |        |        |        |        |        |        |             |          |          |         |             |          |        |
|-------------|--------|--------|--------|--------|--------|--------|--------|--------|-------------|----------|----------|---------|-------------|----------|--------|
| 160600_at   | 118.8  | 131.6  | 127    | 144.3  | 135.1  | 110.7  | 116.7  | 123    | 0.270612495 | 130.425  | 121.375  | 9.05    | 1.074562307 | 0.2654   | -1.075 |
| 160601_at   | 54.9   | 62.5   | 52     | 40.8   | 26.8   | 73.3   | 56.3   | 27.5   | 0.62093849  | 52.55    | 45.975   | 6.575   | 1.143012507 | 0.4485   | -1.244 |
| 160602_at   | 624.4  | 660.6  | 721.4  | 684.3  | 818.5  | 709.8  | 723    | 666.2  | 0.195130525 | 672.675  | 729.375  | 56.7    | 0.922262211 | 0.1821   | -1.083 |
| 160603_at   | 521.3  | 473.7  | 363.7  | 715.9  | 543.9  | 615.1  | 382.6  | 717.4  | 0.666646688 | 518.65   | 564.75   | 46.1    | 0.918370961 | 0.6614   | -1.093 |
| 160604_at   | 4.5    | 6.6    | 6.7    | 5.2    | 11.8   | 5.4    | 13.9   | 6.7    | 0.164431496 | 5.75     | 9.45     | 3.7     | 0.608465608 | 0.1257   | 1.542  |
| 160605_s_at | 250.4  | 225    | 253.1  | 219.2  | 159.7  | 221.1  | 222.4  | 249.3  | 0.314361375 | 236.925  | 213.125  | 23.8    | 1.111671554 | 0.2975   | -1.124 |
| 160606_r_at | 5.2    | 4.4    | 10.8   | 12.2   | 34.3   | 32.3   | 18.2   | 40.6   | 0.010526114 | 8.15     | 31.35    | 23.2    | 0.259968102 | 0.003971 | 4.054  |
| 160607_at   | 300.3  | 503.8  | 313.3  | 514.7  | 412.9  | 440.1  | 452.9  | 633.8  | 0.358477068 | 408.025  | 484.925  | 76.9    | 0.841418776 | 0.3203   | 1.209  |
| 160608_at   | 225.6  | 205.1  | 205.4  | 185    | 81.6   | 65.3   | 79.8   | 174    | 0.019091372 | 205.275  | 100.175  | 105.1   | 2.049163963 | 0.01124  | -2.208 |
| 160609_at   | 1678.9 | 1181   | 1419.3 | 1338.3 | 1075.3 | 1311.2 | 1263.5 | 1473   | 0.388263489 | 1404.375 | 1280.75  | 123.625 | 1.096525473 | 0.3912   | -1.095 |
| 160610_at   | 37.9   | 34.4   | 33.6   | 29.7   | 21.2   | 40.9   | 26.2   | 36.5   | 0.608125508 | 33.9     | 31.2     | 2.7     | 1.086538462 | 0.5031   | -1.12  |
| 160611_at   | 347.5  | 304.7  | 311.8  | 382.8  | 308.5  | 483.5  | 449.2  | 528.3  | 0.108649944 | 336.7    | 442.375  | 105.675 | 0.76111896  | 0.09401  | 1.294  |
| 160612_at   | 552.4  | 549.5  | 456.4  | 553.7  | 675.6  | 617.1  | 657.1  | 633.1  | 0.008938262 | 528      | 645.725  | 117.725 | 0.817685547 | 0.007472 | 1.226  |
| 160613_at   | 166.9  | 213.8  | 152.7  | 190.6  | 169.3  | 178.1  | 165.7  | 281.3  | 0.595772842 | 181      | 198.6    | 17.6    | 0.911379658 | 0.6235   | -1.078 |
| 160614_at   | 371.4  | 401.6  | 246.1  | 782    | 267.7  | 408.5  | 250.5  | 537.6  | 0.557533571 | 450.275  | 366.075  | 84.2    | 1.230007512 | 0.5984   | -1.181 |
| 160615_at   | 269.6  | 353.1  | 298.2  | 392.8  | 355.8  | 387.9  | 362.2  | 506.4  | 0.148472646 | 328.425  | 403.075  | 74.65   | 0.814798735 | 0.1315   | 1.227  |
| 160616_at   | 812.8  | 903.3  | 981.9  | 1260   | 1272.5 | 905.5  | 824.2  | 1435.3 | 0.522721816 | 989.5    | 1109.375 | 119.875 | 0.891943662 | 0.5552   | 1.107  |
| 160617_at   | 147.2  | 380.3  | 227.5  | 380.3  | 344.9  | 345.2  | 325.6  | 311.8  | 0.470426973 | 283.825  | 331.875  | 48.05   | 0.855216573 | 0.3596   | 1.257  |
| 160618_at   | 125.2  | 91.7   | 151.9  | 127.7  | 114.1  | 137.9  | 106.6  | 111    | 0.65715639  | 124.125  | 117.4    | 6.725   | 1.057282794 | 0.723    | -1.045 |
| 160619_at   | 301.2  | 375.1  | 410.9  | 362.5  | 463.9  | 365.4  | 400.2  | 442.1  | 0.130397807 | 362.425  | 417.9    | 55.475  | 0.867252931 | 0.137    | 1.155  |
| 160620_at   | 133.9  | 115    | 123.1  | 179.8  | 50.3   | 177.6  | 77     | 89.7   | 0.267877492 | 137.95   | 98.65    | 39.3    | 1.398378104 | 0.1778   | -1.533 |
| 160621_at   | 802.3  | 563.2  | 638.8  | 576.8  | 739.5  | 573.3  | 575.5  | 530.3  | 0.59205546  | 645.275  | 604.65   | 40.625  | 1.067187629 | 0.5819   | -1.065 |
| 160622_at   | 238.5  | 162.9  | 235.8  | 243.1  | 200.2  | 151.7  | 244.5  | 176.5  | 0.366450422 | 220.075  | 193.225  | 26.85   | 1.138957174 | 0.3784   | -1.142 |
| 160623_at   | 52     | 55.3   | 59.2   | 68.7   | 48.9   | 79.9   | 69     | 70.1   | 0.325045577 | 58.8     | 66.975   | 8.175   | 0.87793953  | 0.3562   | 1.128  |
| 160624_at   | 385.4  | 420.6  | 422.6  | 489.4  | 420.2  | 369.6  | 443.2  | 413.9  | 0.531705305 | 429.5    | 411.725  | 17.775  | 1.04317202  | 0.5398   | -1.041 |
| 160625_f_at | 328.6  | 270.6  | 355.4  | 381.6  | 380.9  | 433.1  | 393.6  | 261.5  | 0.482936067 | 334.05   | 367.275  | 33.225  | 0.909536451 | 0.5453   | -1.089 |
| 160626_at   | 1860.1 | 1710.5 | 1449.5 | 1648.1 | 1654   | 1503.4 | 1435.9 | 1434.5 | 0.16914661  | 1667.05  | 1506.95  | 160.1   | 1.106241083 | 0.161    | -1.104 |
| 160627_at   | 407.4  | 339.7  | 440.6  | 465.5  | 314.3  | 349.5  | 392.5  | 398.8  | 0.19662842  | 413.3    | 363.775  | 49.525  | 1.136141846 | 0.2062   | -1.134 |
| 160628_at   | 136.2  | 149.6  | 123.7  | 160.4  | 169.2  | 184.4  | 161.6  | 150.3  | 0.067764221 | 142.475  | 166.375  | 23.9    | 0.85634861  | 0.06896  | 1.17   |
| 160629_at   | 310.2  | 314.1  | 322.5  | 297.1  | 596.6  | 528    | 596.3  | 376.6  | 0.025301349 | 310.975  | 524.375  | 213.4   | 0.593039333 | 0.003672 | 1.659  |
| 160630_at   | 167.5  | 197.4  | 187.9  | 221.7  | 161.7  | 148.6  | 209.5  | 228.3  | 0.77721994  | 193.625  | 187.025  | 6.6     | 1.0352894   | 0.7136   | -1.046 |
| 160631_s_at | 5.1    | 5.2    | 6.9    | 6.7    | 7.5    | 4.9    | 5.8    | 5.9    | 0.947069813 | 5.975    | 6.025    | 0.05    | 0.991701245 | 0.9719   | -1.004 |
| 160632_at   | 930.8  | 727.1  | 897.8  | 857.4  | 586.8  | 850.2  | 640.8  | 726.6  | 0.084223745 | 853.275  | 701.1    | 152.175 | 1.217051776 | 0.08317  | -1.224 |
| 160633_at   | 2048.3 | 1915.8 | 1933   | 2268.7 | 1845.5 | 1698   | 1558.6 | 2187.2 | 0.223915381 | 2041.45  | 1822.325 | 219.125 | 1.120244742 | 0.1965   | -1.127 |
| 160634_at   | 86.2   | 82.3   | 71.8   | 59.1   | 97.4   | 127.4  | 114.6  | 173    | 0.039106528 | 74.85    | 128.1    | 53.25   | 0.584309133 | 0.01203  | 1.69   |
| 160635_at   | 401.5  | 324.6  | 363.1  | 304.1  | 289.8  | 343.6  | 328.4  | 405.8  | 0.849144247 | 348.325  | 341.9    | 6.425   | 1.018792044 | 0.8341   | -1.021 |
| 160636_at   | 327.1  | 285.9  | 324.1  | 306.6  | 489.8  | 279.2  | 315.5  | 328    | 0.436697353 | 310.925  | 353.125  | 42.2    | 0.880495575 | 0.4352   | 1.111  |
| 160637_at   | 831.8  | 609.2  | 786.6  | 776.4  | 516.6  | 766.5  | 685.1  | 669.2  | 0.246789918 | 751      | 659.35   | 91.65   | 1.139000531 | 0.2644   | -1.143 |
| 160638_at   | 734.2  | 727    | 818.9  | 832    | 647.2  | 739.7  | 639.1  | 607.6  | 0.02334786  | 778.025  | 658.4    | 119.625 | 1.181690462 | 0.02241  | -1.183 |
| 160639_at   | 24.6   | 54.8   | 43.9   | 35.2   | 12.2   | 34.8   | 57.9   | 79.3   | 0.705210142 | 39.625   | 46.05    | 6.425   | 0.860477742 | 0.9729   | -1.016 |
| 160640_at   | 473.2  | 345.4  | 498    | 430.7  | 366.1  | 349.7  | 403.5  | 384.2  | 0.16620984  | 436.825  | 375.875  | 60.95   | 1.162154972 | 0.1515   | -1.153 |
| 160641_at   | 91.8   | 173.6  | 74.4   | 178.8  | 190.5  | 140.1  | 138.8  | 130.4  | 0.537279267 | 129.65   | 149.95   | 20.3    | 0.864621541 | 0.4212   | 1.229  |
| 160642_at   | 150.9  | 225.2  | 194.6  | 242.9  | 315.5  | 215.6  | 254.7  | 231.6  | 0.138077258 | 203.4    | 254.35   | 50.95   | 0.799685473 | 0.1374   | 1.257  |
| 160643_at   | 1694.2 | 1484.2 | 1875.9 | 1866.9 | 2190.8 | 1784.4 | 1952.3 | 1839.6 | 0.151732468 | 1730.3   | 1941.775 | 211.475 | 0.891091913 | 0.1525   | 1.124  |
| 160644_at   | 234.9  | 201.3  | 290.6  | 254.7  | 350.6  | 257.8  | 405    | 204.4  | 0.29297003  | 245.375  | 304.45   | 59.075  | 0.80596157  | 0.3109   | 1.209  |
| 160645_at   | 191.5  | 154.7  | 156.8  | 222.8  | 303.4  | 270.3  | 162.9  | 190.6  | 0.236724028 | 181.45   | 231.8    | 50.35   | 0.782786885 | 0.2334   | 1.252  |
| 160646_at   | 837.8  | 951.4  | 931.9  | 884.3  | 676.2  | 980.9  | 799    | 744.2  | 0.223857512 | 901.35   | 800.075  | 101.275 | 1.126581883 | 0.1793   | -1.136 |
| 160647_at   | 92.7   | 36.7   | 125.1  | 30.5   | 21.6   | 27.2   | 18.3   | 20.6   | 0.118340162 | 71.25    | 21.925   | 49.325  | 3.249714937 | 0.02857  | -2.767 |
| 160648_at   | 2077.7 | 1405   | 1652.4 | 1722.9 | 1056.7 | 1210.8 | 1072.7 | 1150   | 0.020244999 | 1714.5   | 1122.55  | 591.95  | 1.527326177 | 0.00298  | -1.515 |
| 160649_at   | 11.5   | 9.6    | 13.6   | 15.3   | 14.7   | 14.4   | 19.4   | 9.9    | 0.402863318 | 12.5     | 14.6     | 2.1     | 0.856164384 | 0.4357   | 1.155  |
| 160650_at   | 106.4  | 194.3  | 169.5  | 158.9  | 195.5  | 204.6  | 151.6  | 135.2  | 0.584389324 | 157.275  | 171.725  | 14.45   | 0.915853836 | 0.5755   | -1.102 |
| 160651_at   | 9.3    | 33.6   | 33.9   | 13.7   | 10.2   | 6      | 10.5   | 10.6   | 0.131419638 | 22.625   | 9.325    | 13.3    | 2.426273458 | 0.07294  | -2.156 |
| 160652_at   | 1360.6 | 1201.3 | 1453.9 | 1181.4 | 1011.5 | 1558.7 | 1404.9 | 1279.1 | 0.919022148 | 1299.3   | 1313.55  | 14.25   | 0.989151536 | 0.9835   | -1.002 |
| 160653_at   | 154    | 342.7  | 239.7  | 222.1  | 251.2  | 216.1  | 169.8  | 277.4  | 0.818500781 | 239.625  | 228.625  | 11      | 1.048113723 | 0.9078   | -1.024 |
| 160654_at   | 491.9  | 397.3  | 457.4  | 484    | 395    | 472.5  | 349.6  | 474.4  | 0.39220706  | 457.65   | 422.875  | 34.775  | 1.082234703 | 0.3816   | -1.087 |
| 160655_at   | 369.1  | 305.4  | 329.9  | 476    | 334.8  | 365.5  | 254.1  | 446.7  | 0.729960526 | 370.1    | 350.275  | 19.825  | 1.056598387 | 0.7038   | -1.063 |



|             |        |        |        |        |        |        |        |        |             |          |          |         |             |          |        |
|-------------|--------|--------|--------|--------|--------|--------|--------|--------|-------------|----------|----------|---------|-------------|----------|--------|
| 160656_i_at | 60     | 50.8   | 90.4   | 67.8   | 54.6   | 85.6   | 84.2   | 48.8   | 0.93754595  | 67.25    | 68.3     | 1.05    | 0.984626647 | 0.9738   | -1.007 |
| 160657_at   | 1009.3 | 1217   | 1112.8 | 1060.5 | 1214.9 | 1357.9 | 1155.2 | 1236.7 | 0.061371977 | 1099.9   | 1241.175 | 141.275 | 0.886176405 | 0.05905  | 1.129  |
| 160658_at   | 128.5  | 112.5  | 104    | 133.6  | 179.1  | 121.9  | 224.6  | 139.8  | 0.130508444 | 119.65   | 166.35   | 46.7    | 0.719266607 | 0.08175  | 1.36   |
| 160659_at   | 656.8  | 598.3  | 583.9  | 545.2  | 682.2  | 488.3  | 497.4  | 468    | 0.318118483 | 596.05   | 533.975  | 62.075  | 1.116250761 | 0.2535   | -1.127 |
| 160660_r_at | 10.8   | 24.9   | 18.2   | 26.8   | 24     | 39.2   | 34.5   | 12.4   | 0.340762881 | 20.175   | 27.525   | 7.35    | 0.732970027 | 0.4304   | 1.322  |
| 160661_at   | 154.5  | 159.2  | 188.8  | 203.8  | 231    | 168.4  | 216.4  | 189.9  | 0.223698447 | 176.575  | 201.425  | 24.85   | 0.876629018 | 0.2248   | 1.14   |
| 160662_r_at | 88.7   | 81.8   | 31.8   | 61     | 81.4   | 57.5   | 70.1   | 83     | 0.635776745 | 65.825   | 73       | 7.175   | 0.901712329 | 0.53     | 1.18   |
| 160663_at   | 236.3  | 233.2  | 232.4  | 165.4  | 323.1  | 272.3  | 275.5  | 236.3  | 0.051571441 | 216.825  | 276.8    | 59.975  | 0.783327312 | 0.06051  | 1.282  |
| 160664_at   | 364.8  | 487.8  | 381.6  | 454.6  | 439.7  | 456.1  | 470    | 501.6  | 0.234052339 | 422.2    | 466.85   | 44.65   | 0.904359002 | 0.2035   | 1.113  |
| 160665_at   | 7.5    | 5.8    | 7.1    | 4.6    | 9.7    | 4.3    | 7.3    | 4.4    | 0.909341799 | 6.25     | 6.425    | 0.175   | 0.972762646 | 0.9644   | -1.011 |
| 160666_at   | 792    | 553.8  | 752.1  | 758.7  | 672    | 693.2  | 865.1  | 756.3  | 0.656739935 | 714.15   | 746.65   | 32.5    | 0.956472243 | 0.6397   | -1.05  |
| 160667_at   | 348.1  | 580    | 441.4  | 502.2  | 393.1  | 525.9  | 396.3  | 499.9  | 0.822390694 | 467.925  | 453.8    | 14.125  | 1.031126047 | 0.8727   | -1.022 |
| 160668_at   | 1076.7 | 1331.2 | 1631   | 1216.1 | 2480.2 | 1461.6 | 1863.4 | 1464.9 | 0.126825214 | 1313.75  | 1817.525 | 503.775 | 0.72282362  | 0.08766  | 1.366  |
| 160669_at   | 2428.4 | 1602.5 | 2113.9 | 2079.3 | 1219.9 | 1780.5 | 1770.9 | 1618.1 | 0.079862831 | 2056.025 | 1597.35  | 458.675 | 1.287147463 | 0.08797  | -1.288 |
| 160670_at   | 22.1   | 39.9   | 46.1   | 55.1   | 50.2   | 46.1   | 50.1   | 57.8   | 0.242448169 | 40.8     | 51.05    | 10.25   | 0.799216454 | 0.2256   | 1.315  |
| 160671_at   | 336.4  | 278.9  | 181.7  | 350.3  | 339.2  | 249.4  | 373.7  | 212.3  | 0.903095453 | 286.825  | 293.65   | 6.825   | 0.976758045 | 0.8888   | -1.03  |
| 160672_at   | 341.8  | 261.6  | 290.8  | 341.7  | 316.2  | 365.7  | 250.8  | 310.3  | 0.95593344  | 308.975  | 310.75   | 1.775   | 0.994288013 | 0.9764   | -1.003 |
| 160673_at   | 67.3   | 60.6   | 58.7   | 67.8   | 133    | 48.5   | 56.1   | 88.5   | 0.421142038 | 63.6     | 81.525   | 17.925  | 0.780128795 | 0.4908   | 1.186  |
| 160674_at   | 98.1   | 129.7  | 116.9  | 90.1   | 66     | 79.8   | 109.3  | 96.7   | 0.163389531 | 108.7    | 87.95    | 20.75   | 1.235929505 | 0.1633   | -1.245 |
| 160675_at   | 25.2   | 26.1   | 56.7   | 30.3   | 33.7   | 63.2   | 45.8   | 59.9   | 0.162614702 | 34.575   | 50.65    | 16.075  | 0.682625864 | 0.1343   | 1.508  |
| 160676_at   | 2506.3 | 2901.5 | 2526.7 | 3105.8 | 2518.4 | 2481.3 | 2442.4 | 3319.2 | 0.795722239 | 2760.075 | 2690.325 | 69.75   | 1.025926236 | 0.7524   | -1.03  |
| 160677_at   | 185.2  | 234.5  | 205.3  | 241.1  | 216.7  | 248.9  | 221.7  | 274.7  | 0.247064391 | 216.525  | 240.5    | 23.975  | 0.90031185  | 0.2456   | -1.112 |
| 160678_at   | 62.5   | 60.6   | 41.6   | 94.6   | 65.4   | 62.1   | 55.4   | 64     | 0.798837552 | 64.825   | 61.725   | 3.1     | 1.050222762 | 0.9604   | -1.009 |
| 160679_at   | 98.9   | 210.5  | 132.4  | 123.9  | 164.5  | 179.9  | 137.9  | 208.7  | 0.318552642 | 141.425  | 172.75   | 31.325  | 0.818668596 | 0.2532   | 1.256  |
| 160680_at   | 17.6   | 3      | 5.2    | 4.1    | 16.5   | 4.4    | 18.4   | 28.4   | 0.171596075 | 7.475    | 16.925   | 9.45    | 0.441654357 | 0.1663   | 2.416  |
| 160681_at   | 626.8  | 496    | 702.1  | 735.3  | 380.9  | 568.3  | 443.1  | 439.8  | 0.036110612 | 640.05   | 458.025  | 182.025 | 1.397412805 | 0.03281  | -1.397 |
| 160682_at   | 1400.8 | 1339   | 993.7  | 948.8  | 1464.3 | 1118   | 1204.7 | 1111.6 | 0.71883827  | 1170.575 | 1224.65  | 54.075  | 0.955844527 | 0.6678   | -1.055 |
| 160683_at   | 1550.3 | 1673.3 | 1646.9 | 1851.1 | 1980.3 | 1803.9 | 1937.4 | 1787.7 | 0.049681954 | 1680.4   | 1877.325 | 196.925 | 0.895103405 | 0.04673  | 1.118  |
| 160684_at   | 330.8  | 435.2  | 435.6  | 378.9  | 350    | 430.8  | 469.1  | 437.8  | 0.482331835 | 395.125  | 421.925  | 26.8    | 0.936481602 | 0.4953   | -1.068 |
| 160685_at   | 553.2  | 398.6  | 498.7  | 525.1  | 457.4  | 519    | 393.1  | 448    | 0.389560408 | 493.9    | 454.375  | 39.525  | 1.08698762  | 0.4134   | -1.084 |
| 160686_at   | 804.5  | 627.4  | 692.4  | 820.5  | 631.8  | 657.1  | 768.3  | 958.6  | 0.847261034 | 736.2    | 753.95   | 17.75   | 0.976457325 | 0.8933   | -1.016 |
| 160687_r_at | 10.3   | 11.5   | 18     | 6.7    | 1.4    | 1.5    | 18.1   | 14.8   | 0.615820208 | 11.625   | 8.95     | 2.675   | 1.298882682 | 0.3117   | -2.25  |
| 160688_at   | 1648   | 1528.3 | 1460.1 | 1693.7 | 1123.9 | 1275.9 | 1188.9 | 1140.5 | 0.001402516 | 1582.525 | 1182.3   | 400.225 | 1.338513914 | 0.000603 | -1.338 |
| 160689_r_at | 422.9  | 418.8  | 1004.9 | 620.8  | 880    | 550.1  | 1079.8 | 926.6  | 0.222473693 | 616.85   | 859.125  | 242.275 | 0.717997963 | 0.1938   | 1.447  |
| 160690_at   | 725.3  | 571.7  | 782    | 801    | 485.8  | 817.5  | 524.8  | 708.5  | 0.400245989 | 720      | 634.15   | 85.85   | 1.135378065 | 0.3681   | -1.152 |
| 160691_at   | 163.2  | 122.9  | 127.8  | 129.9  | 119    | 134.3  | 161.3  | 159.7  | 0.6003638   | 135.95   | 143.575  | 7.625   | 0.946891868 | 0.6054   | -1.054 |
| 160692_at   | 12.1   | 9.5    | 27.4   | 9.3    | 12.6   | 15     | 7.9    | 21.6   | 0.955965937 | 14.575   | 14.275   | 0.3     | 1.021015762 | 0.9392   | -1.026 |
| 160693_at   | 167.5  | 227.9  | 225.4  | 238.8  | 219.5  | 262.5  | 336.9  | 245.3  | 0.146757359 | 214.9    | 266.05   | 51.15   | 0.807742905 | 0.135    | 1.234  |
| 160694_at   | 615.4  | 847.6  | 779.5  | 737.2  | 699.3  | 786.5  | 717.2  | 685.5  | 0.691938183 | 744.925  | 722.125  | 22.8    | 1.031573481 | 0.7402   | -1.026 |
| 160695_i_at | 144.1  | 158.6  | 140.5  | 165    | 199.7  | 175.4  | 183.4  | 234.7  | 0.030881774 | 152.05   | 198.3    | 46.25   | 0.766767524 | 0.01284  | 1.299  |
| 160696_at   | 942.3  | 977.3  | 784.5  | 1113   | 914.2  | 983.4  | 987.3  | 942.9  | 0.97154108  | 954.275  | 956.95   | 2.675   | 0.997204661 | 0.8979   | -1.01  |
| 160697_at   | 113.1  | 146.9  | 207.6  | 121.6  | 165.6  | 197.8  | 219.8  | 179    | 0.140302166 | 147.3    | 190.55   | 43.25   | 0.773025453 | 0.1086   | 1.324  |
| 160698_s_at | 520.2  | 726.3  | 612.8  | 679.4  | 943.8  | 888.4  | 933.8  | 963.7  | 0.00407636  | 634.675  | 932.425  | 297.75  | 0.680671368 | 0.001929 | 1.48   |
| 160699_at   | 352.8  | 313.2  | 341    | 360.4  | 275.9  | 410.6  | 350.3  | 304.4  | 0.8445609   | 341.85   | 335.3    | 6.55    | 1.019534745 | 0.7613   | -1.03  |
| 160700_i_at | 255.3  | 312.8  | 364.2  | 504.6  | 309.1  | 321.7  | 432.5  | 319.6  | 0.833516007 | 359.225  | 345.725  | 13.5    | 1.039048377 | 0.9235   | -1.017 |
| 160701_at   | 559.9  | 763    | 625.8  | 689.4  | 378.2  | 686.3  | 941.9  | 655.5  | 0.963889497 | 659.525  | 665.475  | 5.95    | 0.991059018 | 0.8675   | -1.036 |
| 160702_at   | 157.7  | 194.6  | 149    | 221.7  | 109.5  | 161.2  | 208.3  | 156.8  | 0.439808506 | 180.75   | 158.95   | 21.8    | 1.137150047 | 0.4159   | -1.151 |
| 160703_at   | 522.2  | 713.8  | 646.4  | 661.6  | 565    | 579.2  | 707.6  | 827.1  | 0.665619366 | 636      | 669.725  | 33.725  | 0.94964351  | 0.6969   | -1.047 |
| 160704_at   | 267.7  | 273.7  | 329    | 276.1  | 264.8  | 315.5  | 253.4  | 244    | 0.451937156 | 286.625  | 269.425  | 17.2    | 1.063839659 | 0.4257   | -1.065 |
| 160705_at   | 2437   | 2392.9 | 3037.7 | 2427.8 | 2386.9 | 1839.4 | 2267.2 | 1490.9 | 0.069117984 | 2573.85  | 1996.1   | 577.75  | 1.289439407 | 0.07157  | -1.305 |
| 160706_at   | 30.7   | 30.6   | 30.3   | 34.7   | 28.7   | 33.2   | 32.8   | 40     | 0.457103273 | 31.575   | 33.675   | 2.1     | 0.937639198 | 0.4707   | -1.059 |
| 160707_at   | 476.2  | 335.9  | 473.2  | 487    | 316    | 358    | 347    | 340.9  | 0.060617757 | 443.075  | 340.475  | 102.6   | 1.301343711 | 0.0341   | -1.288 |
| 160708_at   | 1101.1 | 910    | 1247.2 | 1060   | 1095.2 | 1170.8 | 1153.1 | 1025.9 | 0.699411241 | 1079.575 | 1111.25  | 31.675  | 0.971496063 | 0.6527   | -1.034 |
| 160709_at   | 260.1  | 220.5  | 216.1  | 185.7  | 443.3  | 245.1  | 189.1  | 223    | 0.417434772 | 220.6    | 275.125  | 54.525  | 0.801817356 | 0.4181   | 1.188  |
| 160710_at   | 747.4  | 721.4  | 773.8  | 963.9  | 640.7  | 837.1  | 848.4  | 895    | 0.964311532 | 801.625  | 805.3    | 3.675   | 0.995436483 | 0.9761   | -1.003 |
| 160711_at   | 542.3  | 401.8  | 457.1  | 635.2  | 561.5  | 530.9  | 573.2  | 553.9  | 0.43836854  | 509.1    | 554.875  | 45.775  | 0.917503942 | 0.3581   | -1.106 |



|             |        |        |        |        |        |        |        |        |             |          |          |         |             |           |        |
|-------------|--------|--------|--------|--------|--------|--------|--------|--------|-------------|----------|----------|---------|-------------|-----------|--------|
| 160712_r_at | 27.4   | 61     | 38.5   | 35.3   | 51.2   | 96     | 39.6   | 41.9   | 0.322429333 | 40.55    | 57.175   | 16.625  | 0.70922606  | 0.2695    | 1.377  |
| 160713_at   | 210.6  | 319.6  | 276.2  | 316.6  | 291.3  | 259.8  | 210.3  | 297.4  | 0.637601356 | 280.75   | 264.7    | 16.05   | 1.060634681 | 0.6786    | -1.056 |
| 160714_at   | 1086.7 | 1179.2 | 1054.4 | 1182.9 | 894.6  | 1157.7 | 1419.2 | 1323.3 | 0.579057793 | 1125.8   | 1198.7   | 72.9    | 0.939184116 | 0.6594    | -1.05  |
| 160715_at   | 350    | 346.2  | 451.5  | 443.4  | 217    | 441.6  | 334.2  | 401.1  | 0.427057977 | 397.775  | 348.475  | 49.3    | 1.141473563 | 0.3946    | -1.172 |
| 160716_at   | 257.7  | 323.7  | 361.4  | 357.6  | 299.1  | 289.4  | 325.1  | 315.4  | 0.522975644 | 325.1    | 307.25   | 17.85   | 1.058096013 | 0.5786    | -1.05  |
| 160717_at   | 736.2  | 637.9  | 731.9  | 732.8  | 648.3  | 579.5  | 740.6  | 702.2  | 0.364054206 | 709.7    | 667.65   | 42.05   | 1.062982101 | 0.358     | -1.066 |
| 160718_at   | 892.2  | 713.7  | 862.6  | 1001.8 | 562.1  | 893.7  | 828.4  | 938.4  | 0.572420157 | 867.575  | 805.65   | 61.925  | 1.076863402 | 0.552     | -1.09  |
| 160719_at   | 400.3  | 419.6  | 317.7  | 462.3  | 519.9  | 274.3  | 379    | 468.4  | 0.873117681 | 399.975  | 410.4    | 10.425  | 0.974597953 | 0.9698    | -1.006 |
| 160720_at   | 24.4   | 17.6   | 23.4   | 19.6   | 32.9   | 31.5   | 6.2    | 31.1   | 0.568214523 | 21.25    | 25.425   | 4.175   | 0.835791544 | 0.9922    | -1.004 |
| 160721_at   | 54     | 62.5   | 54     | 72.1   | 15.4   | 51.4   | 51.8   | 38.6   | 0.082728301 | 60.65    | 39.3     | 21.35   | 1.543256997 | 0.1227    | -1.696 |
| 160722_at   | 271.2  | 277.2  | 238.8  | 239.9  | 183.1  | 215.7  | 211    | 235.5  | 0.02211039  | 256.775  | 211.325  | 45.45   | 1.215071572 | 0.02405   | -1.217 |
| 160723_at   | 656.6  | 617    | 596.2  | 624.2  | 612.6  | 526.1  | 564.6  | 623.7  | 0.17033671  | 623.5    | 581.75   | 41.75   | 1.071766223 | 0.1578    | -1.074 |
| 160724_at   | 458.9  | 328.3  | 379    | 279.7  | 220.4  | 363.8  | 277.7  | 424.3  | 0.52595198  | 361.475  | 321.55   | 39.925  | 1.124164205 | 0.4919    | -1.14  |
| 160725_at   | 269.4  | 215.1  | 188.5  | 205.9  | 167.5  | 220    | 112.2  | 321.4  | 0.777966392 | 219.725  | 205.275  | 14.45   | 1.070393375 | 0.5954    | -1.14  |
| 160726_at   | 446.4  | 620.4  | 538.4  | 796.9  | 352    | 376    | 393.3  | 526.8  | 0.080631029 | 600.525  | 412.025  | 188.5   | 1.457496511 | 0.05149   | -1.443 |
| 160727_at   | 1363.9 | 1400.4 | 1620.5 | 1505.3 | 1187.3 | 1689.4 | 1076.8 | 1559.3 | 0.581730415 | 1472.525 | 1378.2   | 94.325  | 1.06844072  | 0.5042    | -1.085 |
| 160728_r_at | 13.8   | 10.8   | 13.2   | 21     | 8.4    | 22     | 6.1    | 6.1    | 0.402199577 | 14.7     | 10.65    | 4.05    | 1.38028169  | 0.2271    | -1.57  |
| 160729_f_at | 10.3   | 31.5   | 65.8   | 27.6   | 11.7   | 46.2   | 43.5   | 69.6   | 0.609764491 | 33.8     | 42.75    | 8.95    | 0.790643275 | 0.6562    | 1.289  |
| 160730_at   | 471.1  | 318.4  | 329.9  | 300.9  | 392.5  | 404.8  | 499.3  | 377    | 0.239182182 | 355.075  | 418.4    | 63.325  | 0.848649618 | 0.194     | 1.19   |
| 160731_at   | 168.8  | 147.9  | 192.2  | 185.1  | 227.5  | 206.1  | 204.8  | 176.3  | 0.081064006 | 173.5    | 203.675  | 30.175  | 0.851847306 | 0.08571   | 1.175  |
| 160732_at   | 193.1  | 404.7  | 320.1  | 296.9  | 314.2  | 383.2  | 370.3  | 364.2  | 0.308887195 | 303.7    | 357.975  | 54.275  | 0.848383267 | 0.2689    | 1.216  |
| 160733_at   | 19.9   | 33.8   | 13.4   | 33.4   | 12     | 10     | 11.5   | 32.9   | 0.295941434 | 25.125   | 16.6     | 8.525   | 1.513554217 | 0.2271    | -1.608 |
| 160734_at   | 2352.8 | 2106.6 | 2185.3 | 2336.4 | 1608.9 | 1597.5 | 1547.9 | 1721.8 | 0.000295084 | 2245.275 | 1619.025 | 626.25  | 1.386806875 | 0.0000839 | -1.386 |
| 160735_at   | 410.9  | 356.5  | 404.2  | 401.3  | 453.3  | 396.6  | 355.5  | 476.6  | 0.413931592 | 393.225  | 420.5    | 27.275  | 0.935136742 | 0.4335    | -1.064 |
| 160736_at   | 131.3  | 115.6  | 147    | 155.2  | 123.4  | 161.7  | 131.6  | 128    | 0.931807299 | 137.275  | 136.175  | 1.1     | 1.008077841 | 0.9381    | -1.007 |
| 160737_at   | 263.2  | 246.8  | 365.4  | 214.3  | 301.6  | 255.4  | 439.3  | 354.8  | 0.250585342 | 272.425  | 337.775  | 65.35   | 0.806528014 | 0.2326    | 1.239  |
| 160738_at   | 202.8  | 299.7  | 212.5  | 259.1  | 278    | 218.7  | 229.8  | 298.8  | 0.679451114 | 243.525  | 256.325  | 12.8    | 0.950063396 | 0.6542    | -1.057 |
| 160739_at   | 149.4  | 171.8  | 140.1  | 192.3  | 128.1  | 173.4  | 88.1   | 226.1  | 0.781745176 | 163.4    | 153.925  | 9.475   | 1.061555953 | 0.6218    | -1.118 |
| 160740_at   | 213.3  | 159.5  | 154.6  | 131    | 206.9  | 164.7  | 169.6  | 173.5  | 0.512085905 | 164.6    | 178.675  | 14.075  | 0.921225689 | 0.4406    | -1.098 |
| 160741_at   | 299.5  | 241.7  | 353.8  | 253.8  | 231.5  | 296.1  | 265.5  | 256.5  | 0.431375089 | 287.2    | 262.4    | 24.8    | 1.094512195 | 0.4399    | -1.086 |
| 160742_at   | 431.7  | 543.2  | 528.2  | 417.2  | 477.4  | 586.5  | 519.1  | 582.8  | 0.194101228 | 480.075  | 541.45   | 61.375  | 0.886646966 | 0.1915    | 1.132  |
| 160743_at   | 873.9  | 742.2  | 933.8  | 771.2  | 691.8  | 779.5  | 770.5  | 918.7  | 0.559037218 | 830.275  | 790.125  | 40.15   | 1.050814745 | 0.5481    | -1.052 |
| 160744_r_at | 140.4  | 209.9  | 235.9  | 149    | 172.3  | 266.6  | 210.2  | 152.9  | 0.642511395 | 183.8    | 200.5    | 16.7    | 0.916708229 | 0.6335    | -1.092 |
| 160745_at   | 138.7  | 392.7  | 266    | 183.3  | 222.4  | 270.8  | 276.8  | 279.5  | 0.782092078 | 245.175  | 262.375  | 17.2    | 0.934444974 | 0.5679    | 1.151  |
| 160746_at   | 168.9  | 157.3  | 204.8  | 179    | 208.8  | 175.6  | 141.1  | 167.7  | 0.816311239 | 177.5    | 173.3    | 4.2     | 1.02423543  | 0.7774    | -1.029 |
| 160747_at   | 695    | 883.7  | 730.3  | 809.1  | 531.6  | 987.1  | 744.5  | 951.6  | 0.841785307 | 779.525  | 803.7    | 24.175  | 0.969920368 | 0.9698    | -1.006 |
| 160748_at   | 181.7  | 238.9  | 262.8  | 123.2  | 326.2  | 176.8  | 159.3  | 82.3   | 0.805819554 | 201.65   | 186.15   | 15.5    | 1.083266183 | 0.6547    | -1.167 |
| 160749_at   | 344.3  | 373.2  | 399.1  | 390.7  | 561.9  | 453.2  | 500.7  | 386.5  | 0.070907582 | 376.825  | 475.575  | 98.75   | 0.792356621 | 0.03944   | 1.252  |
| 160750_at   | 899.6  | 620    | 805    | 790.2  | 511.5  | 757    | 664.9  | 686.8  | 0.164002022 | 778.7    | 655.05   | 123.65  | 1.188764216 | 0.1799    | -1.19  |
| 160751_i_at | 916.5  | 651.7  | 640.7  | 678.3  | 582.8  | 625.8  | 741.6  | 474.5  | 0.226718043 | 721.8    | 606.175  | 115.625 | 1.190745247 | 0.2086    | -1.193 |
| 160752_at   | 67.8   | 37.9   | 81.9   | 56.9   | 77.1   | 53.2   | 73.4   | 77.7   | 0.437371563 | 61.125   | 70.35    | 9.225   | 0.868869936 | 0.408     | 1.182  |
| 160753_at   | 34.7   | 33.7   | 37.9   | 7.3    | 41     | 65.4   | 59.4   | 65.2   | 0.019360056 | 28.4     | 57.75    | 29.35   | 0.491774892 | 0.07905   | 2.378  |
| 160754_at   | 302.8  | 347.2  | 307.8  | 398.6  | 254.3  | 343    | 341.8  | 356.2  | 0.652481075 | 339.1    | 323.825  | 15.275  | 1.04717054  | 0.6466    | -1.05  |
| 160755_at   | 1181.4 | 925.2  | 1055.8 | 1430.4 | 773.4  | 856    | 742    | 790.5  | 0.041673754 | 1148.2   | 790.475  | 357.725 | 1.452544356 | 0.009753  | -1.436 |
| 160756_at   | 1109   | 1279.7 | 1503.9 | 1007.4 | 1450.6 | 1176.8 | 1498.9 | 1129.3 | 0.559016063 | 1225     | 1313.9   | 88.9    | 0.932338839 | 0.5377    | -1.077 |
| 160757_at   | 440.9  | 444    | 480.3  | 658.1  | 397.7  | 522.7  | 452.8  | 611.9  | 0.894881288 | 505.825  | 496.275  | 9.55    | 1.019243363 | 0.8971    | -1.018 |
| 160758_at   | 756.1  | 596.1  | 642.5  | 759.2  | 379.4  | 605    | 516.6  | 617.9  | 0.063308724 | 688.475  | 529.725  | 158.75  | 1.299683798 | 0.07514   | -1.316 |
| 160759_at   | 1092.7 | 961.2  | 1153.7 | 1014.9 | 1021.4 | 949.7  | 1139.3 | 939.5  | 0.516444515 | 1055.625 | 1012.475 | 43.15   | 1.042618336 | 0.5058    | -1.043 |
| 160760_at   | 533.3  | 576.1  | 567.5  | 585.7  | 534    | 581    | 559.1  | 669    | 0.558537672 | 565.65   | 585.775  | 20.125  | 0.965643805 | 0.5678    | -1.032 |
| 160761_at   | 186.6  | 209.9  | 202.7  | 202.5  | 272.7  | 174.9  | 217.3  | 260.9  | 0.259887104 | 200.425  | 231.45   | 31.025  | 0.86595377  | 0.2588    | 1.139  |
| 160762_at   | 195.4  | 331.4  | 216.8  | 357.3  | 304.8  | 251.7  | 301.7  | 357.6  | 0.561340032 | 275.225  | 303.95   | 28.725  | 0.905494325 | 0.482     | 1.133  |
| 160763_at   | 2      | 11.4   | 3.3    | 6      | 15.1   | 3.8    | 3.7    | 10.3   | 0.490950008 | 5.675    | 8.225    | 2.55    | 0.689969605 | 0.4688    | 1.495  |
| 160764_at   | 754.7  | 981    | 800.1  | 911.3  | 1039.3 | 795.9  | 882.1  | 857.2  | 0.678391949 | 861.775  | 893.625  | 31.85   | 0.964358652 | 0.6702    | -1.037 |
| 160765_at   | 509.1  | 487.7  | 544.6  | 449.5  | 694.3  | 503.8  | 537    | 532    | 0.216096773 | 497.725  | 566.775  | 69.05   | 0.87817035  | 0.1813    | 1.132  |
| 160766_at   | 147.4  | 180.3  | 192.5  | 203.7  | 116    | 199.1  | 158    | 156.4  | 0.305693381 | 180.975  | 157.375  | 23.6    | 1.149960286 | 0.2952    | -1.163 |
| 160767_at   | 401.8  | 405.2  | 365    | 562.2  | 440.4  | 373.9  | 498.7  | 328.9  | 0.702650416 | 433.55   | 410.475  | 23.075  | 1.05621536  | 0.6997    | -1.055 |



|             |        |        |        |        |        |        |        |        |             |          |          |         |             |          |        |
|-------------|--------|--------|--------|--------|--------|--------|--------|--------|-------------|----------|----------|---------|-------------|----------|--------|
| 160768_at   | 645.7  | 550.3  | 583    | 971.2  | 528.6  | 610.2  | 564.9  | 707    | 0.4610434   | 687.55   | 602.675  | 84.875  | 1.140830464 | 0.4644   | -1.118 |
| 160769_at   | 406.6  | 288.7  | 249.5  | 369.8  | 281.9  | 298.8  | 355.5  | 317.1  | 0.716582839 | 328.65   | 313.325  | 15.325  | 1.048910875 | 0.7968   | -1.034 |
| 160770_at   | 268.7  | 244    | 217.3  | 258.5  | 284.6  | 256    | 316.6  | 240.4  | 0.231590778 | 247.125  | 274.4    | 27.275  | 0.900601312 | 0.2282   | -1.108 |
| 160771_r_at | 124.8  | 157.2  | 81.2   | 107.5  | 91.9   | 86.2   | 126.5  | 121.7  | 0.582682688 | 117.675  | 106.575  | 11.1    | 1.104152006 | 0.6333   | -1.089 |
| 160772_i_at | 1165.9 | 649.2  | 801.9  | 696.7  | 548.9  | 900.5  | 748.5  | 697.7  | 0.481635993 | 828.425  | 723.9    | 104.525 | 1.144391491 | 0.4848   | -1.131 |
| 160773_at   | 315.6  | 271.4  | 350.6  | 296.9  | 168.2  | 278.8  | 216.9  | 341.5  | 0.23412916  | 308.625  | 251.35   | 57.275  | 1.227869505 | 0.1977   | -1.266 |
| 160774_at   | 92.2   | 62.8   | 90.9   | 101.7  | 56.8   | 76.1   | 74.5   | 101.1  | 0.460097182 | 86.9     | 77.125   | 9.775   | 1.126742301 | 0.4646   | -1.132 |
| 160775_at   | 974.5  | 1264.4 | 1171.9 | 1211.9 | 1016.1 | 1163.3 | 1357.8 | 1423.8 | 0.484092805 | 1155.675 | 1240.25  | 84.575  | 0.931808103 | 0.5129   | -1.069 |
| 160776_at   | 306.8  | 387.3  | 380.9  | 476.3  | 359.1  | 392.9  | 422.9  | 439.5  | 0.704088737 | 387.825  | 403.6    | 15.775  | 0.960914272 | 0.6426   | -1.05  |
| 160777_at   | 263.3  | 325    | 312.4  | 366.3  | 210.8  | 267.3  | 276.4  | 364.1  | 0.373143226 | 316.75   | 279.65   | 37.1    | 1.132665832 | 0.3379   | -1.146 |
| 160778_at   | 299.7  | 382.4  | 401.1  | 404.2  | 512.3  | 311.9  | 298.9  | 437.8  | 0.761865116 | 371.85   | 390.225  | 18.375  | 0.952911782 | 0.8495   | -1.03  |
| 160779_at   | 1627.5 | 1487.9 | 1720.7 | 1469.1 | 1507.2 | 1558.1 | 1917.6 | 1450.8 | 0.801934519 | 1576.3   | 1608.425 | 32.125  | 0.980027045 | 0.8307   | -1.016 |
| 160780_at   | 217    | 333.6  | 243.4  | 240.3  | 275.7  | 304.3  | 364.4  | 263    | 0.253367037 | 258.575  | 301.85   | 43.275  | 0.85663409  | 0.2221   | 1.174  |
| 160781_r_at | 66.8   | 72.8   | 33     | 74.4   | 62     | 72.9   | 42.3   | 91.1   | 0.718665337 | 61.75    | 67.075   | 5.325   | 0.920611256 | 0.7219   | -1.099 |
| 160782_at   | 587.1  | 546.5  | 530.3  | 593    | 314.2  | 511.4  | 496.3  | 551.3  | 0.165240025 | 564.225  | 468.3    | 95.925  | 1.204836643 | 0.1622   | -1.231 |
| 160783_at   | 278.2  | 291.7  | 319.6  | 416.1  | 337.8  | 374.9  | 371.5  | 479.5  | 0.190312738 | 326.4    | 390.925  | 64.525  | 0.834942764 | 0.1662   | 1.202  |
| 160784_r_at | 126    | 103.9  | 135.1  | 110.4  | 131.8  | 134.3  | 106.5  | 91.1   | 0.825093497 | 118.85   | 115.925  | 2.925   | 1.025231831 | 0.7824   | -1.032 |
| 160785_at   | 652    | 657.8  | 686.2  | 831.5  | 653.8  | 742.7  | 642.2  | 875.1  | 0.7636196   | 706.875  | 728.45   | 21.575  | 0.970382319 | 0.7762   | -1.028 |
| 160786_f_at | 59.4   | 82.7   | 122.9  | 60.6   | 49.5   | 83.8   | 145.3  | 136.3  | 0.445200419 | 81.4     | 103.725  | 22.325  | 0.784767414 | 0.5279   | 1.225  |
| 160787_at   | 402.3  | 569.3  | 437.8  | 487.7  | 452.9  | 489.5  | 472.5  | 431.7  | 0.759373838 | 474.275  | 461.65   | 12.625  | 1.027347558 | 0.8144   | -1.02  |
| 160788_at   | 478.8  | 391.2  | 425.8  | 469.9  | 373.7  | 507.8  | 420.4  | 387    | 0.619305571 | 441.425  | 422.225  | 19.2    | 1.045473385 | 0.5805   | -1.05  |
| 160789_at   | 460.5  | 528.1  | 488.7  | 470.4  | 483.2  | 538.1  | 552    | 620.8  | 0.117868214 | 486.925  | 548.525  | 61.6    | 0.887698829 | 0.09878  | 1.123  |
| 160790_s_at | 314.4  | 277.8  | 332.9  | 302.4  | 266.3  | 316.2  | 236.5  | 301.8  | 0.265398041 | 306.875  | 280.2    | 26.675  | 1.095199857 | 0.2545   | -1.1   |
| 160791_at   | 487.6  | 261.5  | 286.8  | 432.8  | 275.7  | 279.8  | 267    | 367    | 0.307647575 | 367.175  | 297.375  | 69.8    | 1.234720471 | 0.3165   | -1.203 |
| 160792_at   | 1092.1 | 1055.3 | 1167   | 1200   | 978.5  | 1012.2 | 824    | 1063.9 | 0.047821816 | 1128.6   | 969.65   | 158.95  | 1.163925128 | 0.04873  | -1.168 |
| 160793_at   | 94.6   | 143.8  | 108.5  | 118.2  | 100.2  | 144.3  | 141.6  | 143.6  | 0.321414056 | 116.275  | 132.425  | 16.15   | 0.878044176 | 0.3374   | 1.139  |
| 160794_at   | 426.9  | 316.4  | 372.4  | 140.2  | 363.9  | 249.8  | 320.2  | 391.1  | 0.814601789 | 313.975  | 331.25   | 17.275  | 0.947849057 | 0.671    | -1.127 |
| 160795_at   | 313.6  | 249.8  | 283.4  | 358.1  | 96.1   | 190.6  | 120.6  | 185.3  | 0.003506115 | 301.225  | 148.15   | 153.075 | 2.033243334 | 0.006885 | -2.099 |
| 160796_at   | 8      | 11     | 10.2   | 9.1    | 9.7    | 13.2   | 13     | 48.7   | 0.298337748 | 9.575    | 21.15    | 11.575  | 0.452718676 | 0.1717   | 1.769  |
| 160797_r_at | 72.9   | 11.5   | 45.8   | 60.8   | 62.4   | 44.3   | 47.4   | 35.5   | 0.981795683 | 47.75    | 47.4     | 0.35    | 1.007383966 | 0.7062   | 1.187  |
| 160798_at   | 149.8  | 156.9  | 99.2   | 166.1  | 213.3  | 134.7  | 210    | 196    | 0.104781291 | 143      | 188.5    | 45.5    | 0.75862069  | 0.1312   | 1.322  |
| 160799_at   | 11.1   | 75.7   | 12     | 10.6   | 31.1   | 52.7   | 26.7   | 15.4   | 0.828323787 | 27.35    | 31.475   | 4.125   | 0.868943606 | 0.4275   | 1.585  |
| 160800_at   | 625.7  | 536.7  | 592.1  | 751.6  | 477.4  | 620.3  | 531    | 869.1  | 0.983997628 | 626.525  | 624.45   | 2.075   | 1.003322924 | 0.8853   | -1.023 |
| 160801_at   | 640    | 543.1  | 708    | 634.9  | 1105.8 | 1147.6 | 1292.1 | 1394.8 | 0.000795764 | 631.5    | 1235.075 | 603.575 | 0.511304981 | 0.000122 | 1.956  |
| 160802_at   | 187.8  | 275.5  | 236.3  | 266.2  | 391.4  | 241.2  | 279.2  | 264.1  | 0.235264948 | 241.45   | 293.975  | 52.525  | 0.821328344 | 0.2136   | 1.209  |
| 160803_at   | 303.7  | 230.7  | 338.3  | 271.4  | 262    | 301.3  | 326.4  | 231.5  | 0.8600341   | 286.025  | 280.3    | 5.725   | 1.020424545 | 0.8709   | -1.019 |
| 160804_at   | 531.8  | 526.1  | 445.2  | 383.5  | 395.8  | 589.3  | 456.2  | 392.5  | 0.828183051 | 471.65   | 458.45   | 13.2    | 1.028792671 | 0.7933   | -1.034 |
| 160805_s_at | 802.5  | 862.7  | 754.9  | 745.7  | 803.5  | 802.6  | 696    | 907.2  | 0.838825566 | 791.45   | 802.325  | 10.875  | 0.986445642 | 0.8695   | -1.011 |
| 160806_at   | 319.5  | 362.7  | 415.7  | 461.2  | 326.7  | 376.9  | 423.9  | 390.8  | 0.792934491 | 389.775  | 379.575  | 10.2    | 1.02687216  | 0.8327   | -1.022 |
| 160807_at   | 317.2  | 405.7  | 436.9  | 402.6  | 495.7  | 446.5  | 538.3  | 461.5  | 0.029118524 | 390.6    | 485.5    | 94.9    | 0.804531411 | 0.0338   | 1.248  |
| 160808_at   | 285.6  | 435.7  | 357.3  | 373.3  | 350.7  | 382.9  | 403.6  | 407.8  | 0.524916672 | 362.975  | 386.25   | 23.275  | 0.9397411   | 0.4747   | -1.074 |
| 160809_at   | 395    | 457.4  | 417.1  | 558.7  | 269.3  | 400.1  | 474.3  | 482.6  | 0.444171684 | 457.05   | 406.575  | 50.475  | 1.124146836 | 0.4231   | -1.143 |
| 160810_r_at | 37.3   | 59     | 65.2   | 64.3   | 190.9  | 122.5  | 185.5  | 116.8  | 0.011953552 | 56.45    | 153.925  | 97.475  | 0.366737047 | 0.001697 | 2.722  |
| 160811_at   | 420.8  | 676.3  | 576.8  | 642.8  | 748.4  | 523.2  | 705.1  | 646.2  | 0.346774445 | 579.175  | 655.725  | 76.55   | 0.883258988 | 0.3588   | 1.14   |
| 160812_at   | 891.5  | 1323.6 | 1032   | 934.7  | 1097.1 | 1258.4 | 1117   | 1285.5 | 0.24921395  | 1045.45  | 1189.5   | 144.05  | 0.878898697 | 0.2027   | 1.149  |
| 160813_r_at | 59.4   | 67.4   | 85.6   | 92.3   | 93.3   | 96.1   | 105    | 45.3   | 0.597447825 | 76.175   | 84.925   | 8.75    | 0.896967913 | 0.746    | -1.077 |
| 160814_at   | 1277.9 | 1381.3 | 1288.9 | 1156.5 | 1388.8 | 1074.4 | 1156.7 | 1146.3 | 0.349252999 | 1276.15  | 1191.55  | 84.6    | 1.070999958 | 0.3223   | -1.074 |
| 160815_at   | 75     | 145.1  | 79.8   | 97.2   | 96.9   | 104.5  | 107.2  | 139.2  | 0.525354393 | 99.275   | 111.95   | 12.675  | 0.886779812 | 0.4211   | 1.157  |
| 160816_at   | 17.9   | 81.5   | 30.6   | 44.7   | 33.2   | 65.3   | 28.1   | 62.1   | 0.842427819 | 43.675   | 47.175   | 3.5     | 0.925808161 | 0.6908   | 1.174  |
| 160817_at   | 27.7   | 6.7    | 3.9    | 39.8   | 11.8   | 13.2   | 12.6   | 11     | 0.454232425 | 19.525   | 12.15    | 7.375   | 1.606995885 | 0.8971   | -1.078 |
| 160818_at   | 187.9  | 217.7  | 320.8  | 183.1  | 299.3  | 271.3  | 366.2  | 281.7  | 0.098776978 | 227.375  | 304.625  | 77.25   | 0.74640952  | 0.0756   | 1.366  |
| 160819_at   | 445.8  | 528.9  | 476.3  | 522.1  | 487.4  | 605.2  | 514.5  | 734    | 0.198706368 | 493.275  | 585.275  | 92      | 0.842808936 | 0.1617   | 1.174  |
| 160820_at   | 517.7  | 658.3  | 599.9  | 860.5  | 688.5  | 724    | 818.3  | 982.6  | 0.193075106 | 659.1    | 803.35   | 144.25  | 0.82043941  | 0.1726   | 1.229  |
| 160821_r_at | 375.5  | 199    | 393.3  | 599.1  | 320.9  | 339.7  | 333.7  | 771.1  | 0.730786359 | 391.725  | 441.35   | 49.625  | 0.887560893 | 0.7205   | 1.124  |
| 160822_at   | 431.2  | 659.2  | 563.5  | 554.5  | 979.8  | 567.7  | 676.2  | 862.8  | 0.094355123 | 552.1    | 771.625  | 219.525 | 0.715502997 | 0.07476  | 1.383  |
| 160823_at   | 775.8  | 562.5  | 692.8  | 641.3  | 464.8  | 606    | 481.9  | 515.4  | 0.036838773 | 668.1    | 517.025  | 151.075 | 1.292200571 | 0.0293   | -1.29  |



|             |        |        |        |        |        |        |        |        |             |          |          |         |             |           |        |
|-------------|--------|--------|--------|--------|--------|--------|--------|--------|-------------|----------|----------|---------|-------------|-----------|--------|
| 160824_at   | 184    | 318.6  | 215.9  | 245.5  | 210.6  | 205.8  | 248.4  | 245.5  | 0.686677213 | 241      | 227.575  | 13.425  | 1.058991541 | 0.7588    | -1.041 |
| 160825_at   | 457.4  | 547.7  | 547.8  | 646.1  | 492.3  | 630    | 559.3  | 579.4  | 0.758294197 | 549.75   | 565.25   | 15.5    | 0.972578505 | 0.7322    | -1.032 |
| 160826_at   | 206.2  | 258.1  | 268.4  | 325.8  | 237.1  | 283.1  | 291.5  | 327.1  | 0.539418562 | 264.625  | 284.7    | 20.075  | 0.929487179 | 0.5149    | -1.083 |
| 160827_at   | 762.1  | 823.2  | 742.2  | 830.2  | 881.2  | 858    | 902.1  | 1074.3 | 0.058927211 | 789.425  | 928.9    | 139.475 | 0.849849284 | 0.03307   | 1.173  |
| 160828_at   | 666.2  | 975.2  | 698.8  | 994.8  | 532.8  | 724.9  | 572.1  | 966.6  | 0.346627671 | 833.75   | 699.1    | 134.65  | 1.192604778 | 0.3172    | -1.206 |
| 160829_at   | 73.5   | 111.7  | 67.3   | 153.7  | 89.6   | 84     | 94.3   | 115.8  | 0.804267955 | 101.55   | 95.925   | 5.625   | 1.058639562 | 0.9689    | -1.008 |
| 160830_at   | 123.3  | 197.8  | 108.8  | 141.8  | 150.2  | 179.5  | 192.8  | 201.1  | 0.154505188 | 142.925  | 180.9    | 37.975  | 0.790077391 | 0.1266    | 1.291  |
| 160831_at   | 111.3  | 137.8  | 173.5  | 123.2  | 130.8  | 180.5  | 149.3  | 138.4  | 0.473840855 | 136.45   | 149.75   | 13.3    | 0.911185309 | 0.4338    | -1.104 |
| 160832_at   | 449.4  | 604.7  | 500.2  | 618.8  | 529.2  | 549    | 600.5  | 689.4  | 0.405201487 | 543.275  | 592.025  | 48.75   | 0.917655504 | 0.3916    | -1.094 |
| 160833_at   | 130.5  | 172.4  | 149.3  | 201.1  | 123.9  | 148.8  | 150    | 113.3  | 0.160774809 | 163.325  | 134      | 29.325  | 1.218843284 | 0.1491    | -1.212 |
| 160834_at   | 344.6  | 312.8  | 360.6  | 309.8  | 597.3  | 318.6  | 504.3  | 364.4  | 0.171759557 | 331.95   | 446.15   | 114.2   | 0.744032276 | 0.1243    | 1.305  |
| 160835_i_at | 217.8  | 298.5  | 182.2  | 209.1  | 296    | 300.5  | 230.6  | 199.3  | 0.432541549 | 226.9    | 256.6    | 29.7    | 0.884255651 | 0.4194    | 1.133  |
| 160836_at   | 154.5  | 328    | 211.7  | 256.4  | 189.4  | 227.6  | 334.5  | 341.2  | 0.52693367  | 237.65   | 273.175  | 35.525  | 0.869955157 | 0.5252    | 1.156  |
| 160837_at   | 295.5  | 307.1  | 323.4  | 379.1  | 387.6  | 323    | 302.3  | 378.7  | 0.468049107 | 326.275  | 347.9    | 21.625  | 0.937841334 | 0.4673    | -1.065 |
| 160838_at   | 165.4  | 165.6  | 181.3  | 136.5  | 169.5  | 127.3  | 111.9  | 177.6  | 0.43821227  | 162.2    | 146.575  | 15.625  | 1.106600716 | 0.4       | -1.121 |
| 160839_at   | 12.4   | 42.8   | 39.4   | 67.3   | 69.1   | 54.8   | 65.4   | 19.1   | 0.495162225 | 40.475   | 52.1     | 11.625  | 0.776871401 | 0.5423    | 1.354  |
| 160840_at   | 579.8  | 462.8  | 510.6  | 570.6  | 351.4  | 533.1  | 430.7  | 285.7  | 0.087263277 | 530.95   | 400.225  | 130.725 | 1.326628771 | 0.07812   | -1.357 |
| 160841_at   | 139.5  | 146.1  | 126.1  | 131.4  | 180.1  | 149.2  | 135.7  | 147.8  | 0.166365174 | 135.775  | 153.2    | 17.425  | 0.886259791 | 0.1361    | -1.124 |
| 160842_at   | 250.5  | 165.3  | 244.6  | 333    | 202    | 274.5  | 186.8  | 185.8  | 0.410933819 | 248.35   | 212.275  | 36.075  | 1.169944647 | 0.4426    | -1.151 |
| 160843_at   | 549.1  | 661.6  | 590.8  | 870    | 247    | 623.1  | 359.8  | 460.9  | 0.062379676 | 667.875  | 422.7    | 245.175 | 1.580021292 | 0.06474   | -1.645 |
| 160844_at   | 485.9  | 483.5  | 436.1  | 463.8  | 627    | 508.1  | 461.6  | 479.4  | 0.26329408  | 467.325  | 519.025  | 51.7    | 0.900390155 | 0.2242    | -1.104 |
| 160845_at   | 859.9  | 607.6  | 720.4  | 836.1  | 610.6  | 538.2  | 680    | 553.9  | 0.063950528 | 756      | 595.675  | 160.325 | 1.269148445 | 0.0507    | -1.263 |
| 160846_at   | 478.5  | 460.1  | 450    | 366.1  | 449.3  | 513.8  | 356.1  | 424.6  | 0.949327797 | 438.675  | 435.95   | 2.725   | 1.006250717 | 0.9239    | -1.01  |
| 160847_at   | 1897.1 | 1341   | 1518.9 | 1459.2 | 1824.5 | 1425.4 | 1462.2 | 1588.8 | 0.892875803 | 1554.05  | 1575.225 | 21.175  | 0.986557476 | 0.8582    | -1.017 |
| 160848_at   | 1320.5 | 822    | 805.2  | 875.8  | 717    | 1071.5 | 791    | 874.5  | 0.550262733 | 955.875  | 863.5    | 92.375  | 1.106977417 | 0.5512    | -1.096 |
| 160849_at   | 655.6  | 787.7  | 890.6  | 873.1  | 707.3  | 799    | 891.4  | 893    | 0.774094032 | 801.75   | 822.675  | 20.925  | 0.974564682 | 0.7613    | -1.029 |
| 160850_at   | 588.1  | 832.1  | 744.8  | 798.7  | 830.2  | 765.2  | 948.9  | 1090   | 0.114017343 | 740.925  | 908.575  | 167.65  | 0.815480285 | 0.1131    | 1.226  |
| 160851_r_at | 167    | 178.8  | 128.3  | 261    | 182.2  | 190.1  | 197.1  | 240.9  | 0.573167675 | 183.775  | 202.575  | 18.8    | 0.907194866 | 0.4641    | 1.132  |
| 160852_at   | 2.9    | 2.7    | 3.9    | 3.1    | 4.9    | 3.1    | 4.8    | 5      | 0.057181159 | 3.15     | 4.45     | 1.3     | 0.707865169 | 0.05717   | 1.398  |
| 160853_at   | 767.6  | 659.4  | 472.2  | 351.4  | 645.1  | 616    | 554.6  | 542.5  | 0.796169786 | 562.65   | 589.55   | 26.9    | 0.954371979 | 0.6404    | -1.092 |
| 160854_at   | 278.9  | 317.1  | 240.4  | 374.9  | 264.9  | 385.7  | 235.8  | 299.3  | 0.887450852 | 302.825  | 296.425  | 6.4     | 1.021590622 | 0.8652    | -1.025 |
| 160855_at   | 8.7    | 10.7   | 8.7    | 10.1   | 8.5    | 26.1   | 5.3    | 3      | 0.837699474 | 9.55     | 10.725   | 1.175   | 0.89044289  | 0.661     | -1.238 |
| 160856_at   | 446.7  | 481.4  | 338.1  | 448.3  | 481.3  | 409.1  | 261    | 384.6  | 0.455723804 | 428.625  | 384      | 44.625  | 1.116210938 | 0.4404    | -1.133 |
| 160857_at   | 266.2  | 296    | 242.5  | 270.9  | 252.3  | 285.2  | 287.2  | 384.7  | 0.338068246 | 268.9    | 302.35   | 33.45   | 0.889366628 | 0.318     | -1.113 |
| 160858_at   | 425.3  | 340.7  | 394.2  | 516.2  | 508    | 382.5  | 503.9  | 429.8  | 0.469107614 | 419.1    | 456.05   | 36.95   | 0.918978182 | 0.4502    | -1.093 |
| 160859_s_at | 739    | 1037.2 | 647.4  | 849.2  | 692.6  | 892.5  | 778.2  | 1036.4 | 0.786847385 | 818.2    | 849.925  | 31.725  | 0.962673177 | 0.763     | -1.043 |
| 160860_at   | 169.4  | 264.2  | 135.4  | 157.7  | 144    | 215.9  | 117.5  | 264.9  | 0.932362966 | 181.675  | 185.575  | 3.9     | 0.978984238 | 0.9898    | -1.003 |
| 160861_s_at | 142.1  | 127    | 137.4  | 87.7   | 101.8  | 131.6  | 123.3  | 127.7  | 0.868847582 | 123.55   | 121.1    | 2.45    | 1.020231214 | 0.953     | -1.008 |
| 160862_at   | 259    | 444.1  | 365.2  | 385.5  | 466.8  | 453.9  | 445.4  | 453.6  | 0.097821227 | 363.45   | 454.925  | 91.475  | 0.798922899 | 0.07856   | 1.275  |
| 160863_at   | 471.1  | 519.8  | 534.2  | 530.6  | 218.6  | 174.1  | 209.6  | 231.5  | 4.85275E-06 | 513.925  | 208.45   | 305.475 | 2.465459343 | 0.0000112 | -2.476 |
| 160864_at   | 250    | 258.4  | 262.1  | 286.5  | 298.8  | 306    | 262.8  | 314.8  | 0.069803889 | 264.25   | 295.6    | 31.35   | 0.89394452  | 0.0652    | 1.118  |
| 160865_at   | 32.4   | 33.5   | 37.4   | 29.1   | 23.8   | 36.7   | 9.9    | 9.3    | 0.134388543 | 33.1     | 19.925   | 13.175  | 1.661229611 | 0.09636   | -1.959 |
| 160866_at   | 405    | 374.2  | 623.6  | 454.2  | 469.7  | 482    | 365    | 645.7  | 0.754089123 | 464.25   | 490.6    | 26.35   | 0.946290257 | 0.7481    | -1.056 |
| 160867_at   | 111.1  | 182.9  | 143.6  | 162.3  | 163.2  | 175    | 183.7  | 212.7  | 0.125294178 | 149.975  | 183.65   | 33.675  | 0.816634903 | 0.1256    | 1.239  |
| 160868_at   | 93.1   | 92.3   | 81.5   | 38.2   | 276.6  | 220    | 176.3  | 121.2  | 0.026990595 | 76.275   | 198.525  | 122.25  | 0.384208538 | 0.01256   | 2.64   |
| 160869_at   | 225.2  | 235.1  | 215.3  | 243.4  | 279.2  | 211.2  | 269.8  | 242.5  | 0.273568385 | 229.75   | 250.675  | 20.925  | 0.916525381 | 0.272     | -1.086 |
| 160870_at   | 187.5  | 205.5  | 180    | 179.8  | 258.5  | 165.9  | 217.8  | 239.2  | 0.206970033 | 188.2    | 220.35   | 32.15   | 0.854095757 | 0.2022    | 1.157  |
| 160871_at   | 18.3   | 74.7   | 20.1   | 20.6   | 50.7   | 37.4   | 49.9   | 12.8   | 0.804068826 | 33.425   | 37.7     | 4.275   | 0.886604775 | 0.6986    | 1.209  |
| 160872_f_at | 346    | 272    | 272.8  | 302.6  | 279.9  | 370.1  | 290    | 300.3  | 0.677934149 | 298.35   | 310.075  | 11.725  | 0.962186568 | 0.6751    | -1.038 |
| 160873_at   | 50.3   | 43.9   | 5      | 61.9   | 30.1   | 8      | 40.1   | 46.8   | 0.571278847 | 40.275   | 31.25    | 9.025   | 1.2888      | 0.8874    | -1.111 |
| 160874_r_at | 440.8  | 378.5  | 586.3  | 424.1  | 382    | 440.2  | 472.2  | 694.5  | 0.646452954 | 457.425  | 497.225  | 39.8    | 0.919955754 | 0.6686    | -1.074 |
| 160875_at   | 2275.4 | 2133.2 | 2387   | 2312.4 | 2398.4 | 2348.9 | 2406.7 | 2282.4 | 0.23720081  | 2277     | 2359.1   | 82.1    | 0.965198593 | 0.2247    | -1.037 |
| 160876_at   | 1193.8 | 907.3  | 883.2  | 915.8  | 694.9  | 934.8  | 930.3  | 1018.9 | 0.457292878 | 975.025  | 894.725  | 80.3    | 1.089748247 | 0.451     | -1.092 |
| 160877_at   | 3287.5 | 2318.6 | 2503.3 | 2909.7 | 2118.5 | 3131.5 | 2998.7 | 2418.4 | 0.79432681  | 2754.775 | 2666.775 | 88      | 1.032998659 | 0.7762    | -1.036 |
| 160878_at   | 485.4  | 466.7  | 429.2  | 480.3  | 351    | 386.1  | 379.4  | 428.3  | 0.008964041 | 465.4    | 386.2    | 79.2    | 1.205075091 | 0.009047  | -1.207 |
| 160879_at   | 74.8   | 76.3   | 109.5  | 97.6   | 41.4   | 93.8   | 66.3   | 94.7   | 0.354874194 | 89.55    | 74.05    | 15.5    | 1.209318028 | 0.3303    | -1.258 |



|             |        |        |        |        |        |        |        |        |             |          |         |         |             |          |        |
|-------------|--------|--------|--------|--------|--------|--------|--------|--------|-------------|----------|---------|---------|-------------|----------|--------|
| 160880_at   | 168.4  | 363.1  | 313.3  | 329.9  | 348.6  | 382.3  | 365.3  | 374    | 0.18406057  | 293.675  | 367.55  | 73.875  | 0.799006938 | 0.1828   | 1.303  |
| 160881_at   | 36     | 47.4   | 40     | 14.9   | 24.9   | 45.9   | 38.7   | 74.5   | 0.403090799 | 34.575   | 46      | 11.425  | 0.751630435 | 0.4256   | 1.342  |
| 160882_at   | 159.4  | 161.6  | 162.9  | 156.4  | 251.9  | 118.6  | 137.6  | 174.9  | 0.741364566 | 160.075  | 170.75  | 10.675  | 0.937481698 | 0.8948   | -1.023 |
| 160883_at   | 141.7  | 174.4  | 158.9  | 197.1  | 113.1  | 158.6  | 187.6  | 172.5  | 0.632761857 | 168.025  | 157.95  | 10.075  | 1.063786008 | 0.6024   | -1.075 |
| 160884_at   | 82     | 91.4   | 81.9   | 132.3  | 134.8  | 121.8  | 159.9  | 99.2   | 0.116474691 | 96.9     | 128.925 | 32.025  | 0.751599767 | 0.1026   | 1.338  |
| 160885_at   | 2436.1 | 2694.8 | 2509.1 | 2659.7 | 2055.1 | 2457.4 | 2453.7 | 2158.4 | 0.058819237 | 2574.925 | 2281.15 | 293.775 | 1.128783728 | 0.05311  | -1.131 |
| 160886_i_at | 2      | 0.5    | 1.5    | 1.7    | 0.6    | 0.3    | 1.3    | 1.5    | 0.291411477 | 1.425    | 0.925   | 0.5     | 1.540540541 | 0.3098   | -1.71  |
| 160887_at   | 376.2  | 509.2  | 445.2  | 523.9  | 593.6  | 398.8  | 572.9  | 588.1  | 0.246998722 | 463.625  | 538.35  | 74.725  | 0.861196248 | 0.2808   | 1.156  |
| 160888_at   | 414.2  | 472.5  | 413.3  | 384.9  | 480.6  | 427    | 383.5  | 386.8  | 0.95419969  | 421.225  | 419.475 | 1.75    | 1.004171882 | 0.9356   | -1.006 |
| 160889_at   | 404.8  | 290.8  | 385.8  | 400.5  | 286.5  | 382.7  | 341.4  | 347.8  | 0.3942241   | 370.475  | 339.6   | 30.875  | 1.090915783 | 0.4308   | -1.087 |
| 160890_at   | 975.6  | 827.8  | 1067.4 | 1235.9 | 742.1  | 1021.1 | 899    | 1022.9 | 0.369801199 | 1026.675 | 921.275 | 105.4   | 1.114406665 | 0.3836   | -1.112 |
| 160891_at   | 39.2   | 32.8   | 62.2   | 30.3   | 47.2   | 39.4   | 42.9   | 42.8   | 0.808919715 | 41.125   | 43.075  | 1.95    | 0.954730122 | 0.6201   | -1.09  |
| 160892_at   | 103.4  | 91.6   | 44     | 98.8   | 94.4   | 196.7  | 133.9  | 72.3   | 0.255303062 | 84.45    | 124.325 | 39.875  | 0.679268047 | 0.2602   | 1.445  |
| 160893_at   | 73     | 61.5   | 30.4   | 19.1   | 8.8    | 15.5   | 15.6   | 11.1   | 0.077938128 | 46       | 12.75   | 33.25   | 3.607843137 | 0.01374  | -3.241 |
| 160894_at   | 322.3  | 520.2  | 418.7  | 582.1  | 676    | 493.1  | 493.4  | 552.1  | 0.245697159 | 460.825  | 553.65  | 92.825  | 0.832339926 | 0.2318   | 1.221  |
| 160895_at   | 620.4  | 476.8  | 509    | 219.4  | 418    | 377.7  | 486.3  | 95.4   | 0.389172653 | 456.4    | 344.35  | 112.05  | 1.325395673 | 0.4257   | -1.457 |
| 160896_at   | 2163.5 | 1847.3 | 2015.9 | 2307.7 | 1606.4 | 2364   | 2156.5 | 1959.7 | 0.75643365  | 2083.6   | 2021.65 | 61.95   | 1.030643286 | 0.7134   | -1.037 |
| 160897_at   | 197.1  | 199.7  | 207.7  | 190.9  | 220.7  | 194.6  | 301.7  | 293.1  | 0.135255178 | 198.85   | 252.525 | 53.675  | 0.787446787 | 0.08744  | 1.249  |
| 160898_at   | 480.4  | 379.5  | 317.8  | 442.9  | 434.1  | 343.5  | 303.6  | 213.4  | 0.213094601 | 405.15   | 323.65  | 81.5    | 1.251815233 | 0.2096   | -1.277 |
| 160899_at   | 48.1   | 54     | 27.6   | 33.9   | 88.5   | 60.8   | 54.2   | 92.5   | 0.033376968 | 40.9     | 74      | 33.1    | 0.552702703 | 0.02606  | 1.824  |
| 160900_at   | 600.8  | 747.7  | 714    | 811.9  | 564.6  | 651.4  | 750.4  | 519.6  | 0.200943394 | 718.6    | 621.5   | 97.1    | 1.156234916 | 0.1974   | -1.161 |
| 160901_at   | 78.4   | 163.4  | 102.5  | 101.5  | 90.6   | 133.1  | 103.8  | 151.6  | 0.728997442 | 111.45   | 119.775 | 8.325   | 0.930494678 | 0.662    | -1.092 |
| 160902_at   | 70.5   | 43.8   | 79.5   | 65.8   | 68.8   | 61.4   | 75.2   | 60.5   | 0.858910759 | 64.9     | 66.475  | 1.575   | 0.976306882 | 0.7652   | -1.044 |
| 160903_at   | 243.3  | 215.3  | 152.5  | 244.8  | 162.4  | 210.6  | 199.9  | 200.2  | 0.433983    | 213.975  | 193.275 | 20.7    | 1.107101281 | 0.503    | -1.093 |
| 160904_at   | 503.9  | 569.4  | 623.2  | 531.6  | 719.9  | 490.3  | 561.4  | 707.8  | 0.364688776 | 557.025  | 619.85  | 62.825  | 0.898644833 | 0.3852   | -1.102 |
| 160905_s_at | 386.4  | 386.7  | 440.2  | 379.5  | 285.7  | 308.3  | 288.6  | 335.3  | 0.002366343 | 398.2    | 304.475 | 93.725  | 1.307824945 | 0.001776 | -1.308 |
| 160906_i_at | 129.2  | 107.3  | 138    | 69.8   | 93.7   | 106.1  | 16.6   | 75.8   | 0.181958998 | 111.075  | 73.05   | 38.025  | 1.520533881 | 0.2434   | -1.807 |
| 160907_at   | 1704.4 | 1292.4 | 1317.8 | 1312.7 | 1054.8 | 832.5  | 778.5  | 911.7  | 0.007144869 | 1406.825 | 894.375 | 512.45  | 1.572969951 | 0.002859 | -1.573 |
| 160908_r_at | 525.2  | 424.1  | 530.4  | 510.3  | 454.5  | 449.5  | 499.9  | 496.2  | 0.464537492 | 497.5    | 475.025 | 22.475  | 1.047313299 | 0.4935   | -1.044 |
| 160909_at   | 32.5   | 79.7   | 51.7   | 67.8   | 37.8   | 55.3   | 83.6   | 119.4  | 0.47045924  | 57.925   | 74.025  | 16.1    | 0.78250591  | 0.5364   | 1.231  |
| 160910_at   | 30.6   | 24.9   | 22.8   | 22.5   | 8.8    | 39     | 37.3   | 7.3    | 0.827481964 | 25.2     | 23.1    | 2.1     | 1.090909091 | 0.465    | -1.43  |
| 160911_at   | 148.2  | 255.3  | 193.4  | 256.9  | 138.2  | 247.7  | 181.5  | 194.5  | 0.532414151 | 213.45   | 190.475 | 22.975  | 1.120619504 | 0.5575   | -1.117 |
| 160912_i_at | 126.5  | 90     | 102.1  | 53.8   | 114.1  | 71.4   | 58     | 115.6  | 0.880114773 | 93.1     | 89.775  | 3.325   | 1.037037037 | 0.8956   | -1.035 |
| 160913_at   | 68.3   | 87     | 67.2   | 63.2   | 89.6   | 55.3   | 80.7   | 137.8  | 0.349317658 | 71.425   | 90.85   | 19.425  | 0.786186021 | 0.3688   | 1.215  |
| 160914_at   | 15.2   | 7.6    | 14.7   | 17.1   | 21.7   | 15.6   | 16.1   | 15.6   | 0.214050352 | 13.65    | 17.25   | 3.6     | 0.791304348 | 0.231    | 1.304  |
| 160915_at   | 408.1  | 537.4  | 496.8  | 597.2  | 505.9  | 451.8  | 562.6  | 568.6  | 0.807513339 | 509.875  | 522.225 | 12.35   | 0.97635119  | 0.7734   | -1.03  |
| 160916_at   | 62.5   | 64.8   | 94.4   | 70.4   | 94     | 95     | 72.8   | 109.3  | 0.108804498 | 73.025   | 92.775  | 19.75   | 0.787119375 | 0.103    | 1.274  |
| 160917_r_at | 47.5   | 42.7   | 40.6   | 39.7   | 39.4   | 76.9   | 33.2   | 39.8   | 0.672410363 | 42.625   | 47.325  | 4.7     | 0.900686741 | 0.7994   | -1.052 |
| 160918_at   | 14.5   | 13.4   | 12.3   | 2.8    | 4.9    | 12.7   | 5.1    | 3.2    | 0.260529797 | 10.75    | 6.475   | 4.275   | 1.66023166  | 0.3689   | -1.605 |
| 160919_r_at | 14.4   | 13.3   | 10.7   | 22.4   | 14.8   | 16.4   | 10.8   | 11.1   | 0.535101135 | 15.2     | 13.275  | 1.925   | 1.145009416 | 0.5567   | -1.123 |
| 160920_at   | 344.3  | 419.6  | 495.1  | 507.9  | 383    | 472    | 476    | 581.3  | 0.536795974 | 441.725  | 478.075 | 36.35   | 0.923965905 | 0.5423   | -1.083 |
| 160921_at   | 357.2  | 441.7  | 424.2  | 485.5  | 270.2  | 244.6  | 241.4  | 242.9  | 0.005143723 | 427.15   | 249.775 | 177.375 | 1.710139125 | 0.000261 | -1.702 |
| 160922_at   | 173.1  | 177.5  | 205.9  | 219.8  | 212.7  | 265.5  | 209    | 209.9  | 0.142132174 | 194.075  | 224.275 | 30.2    | 0.865343886 | 0.1284   | 1.155  |
| 160923_at   | 150.1  | 126.9  | 153.4  | 109.1  | 125    | 155.5  | 175.9  | 156.3  | 0.262474374 | 134.875  | 153.175 | 18.3    | 0.880528807 | 0.2729   | 1.138  |
| 160924_at   | 336.6  | 355.9  | 297    | 337.4  | 428.7  | 314    | 337.6  | 286.8  | 0.777272598 | 331.725  | 341.775 | 10.05   | 0.970594689 | 0.8349   | -1.021 |
| 160925_at   | 384    | 331.1  | 330.3  | 479.7  | 485.1  | 392.2  | 558.8  | 451.6  | 0.116266716 | 381.275  | 471.925 | 90.65   | 0.807914393 | 0.1073   | 1.242  |
| 160926_r_at | 2.3    | 1.2    | 3.2    | 5.5    | 1.4    | 4.1    | 4.1    | 2.6    | 1           | 3.05     | 3.05    | 0       | 1           | 0.8699   | -1.072 |
| 160927_at   | 71.4   | 129.6  | 126.5  | 80.9   | 69.8   | 69.7   | 112.1  | 77.5   | 0.323321756 | 102.1    | 82.275  | 19.825  | 1.240960194 | 0.3294   | -1.223 |
| 160928_at   | 59.4   | 24.1   | 51.5   | 60.3   | 67.8   | 52.9   | 54.6   | 28.9   | 0.855740517 | 48.825   | 51.05   | 2.225   | 0.956415279 | 0.8407   | -1.061 |
| 160929_at   | 143.9  | 127.5  | 155.4  | 134    | 175.6  | 130.6  | 118.2  | 140    | 0.950713028 | 140.2    | 141.1   | 0.9     | 0.993621545 | 0.985    | -1.002 |
| 160930_at   | 828    | 541.7  | 699.1  | 753.1  | 603.1  | 566.8  | 658.6  | 716.1  | 0.364145539 | 705.475  | 636.15  | 69.325  | 1.10897587  | 0.3953   | -1.1   |
| 160931_at   | 559.3  | 469.7  | 540.4  | 563.4  | 452.4  | 520.3  | 634.6  | 437.1  | 0.6793539   | 533.2    | 511.1   | 22.1    | 1.04324007  | 0.6109   | -1.052 |
| 160932_at   | 82.1   | 50     | 63.2   | 49.8   | 53.7   | 59.1   | 76.4   | 60.9   | 0.895331082 | 61.275   | 62.525  | 1.25    | 0.980007997 | 0.8212   | -1.034 |
| 160933_at   | 109    | 90.9   | 98.8   | 115.7  | 134.8  | 148.2  | 120.2  | 156    | 0.011375793 | 103.6    | 139.8   | 36.2    | 0.741058655 | 0.008845 | 1.348  |
| 160934_s_at | 180.3  | 129.4  | 165.4  | 156    | 98     | 139.7  | 71.9   | 131.8  | 0.051955236 | 157.775  | 110.35  | 47.425  | 1.429768917 | 0.06261  | -1.468 |
| 160935_at   | 209.9  | 258.3  | 265.5  | 277.9  | 190.9  | 271.9  | 198.3  | 360.8  | 0.954492159 | 252.9    | 255.475 | 2.575   | 0.989920736 | 0.9116   | -1.019 |



|             |        |        |        |        |        |        |        |        |             |          |          |         |             |          |        |
|-------------|--------|--------|--------|--------|--------|--------|--------|--------|-------------|----------|----------|---------|-------------|----------|--------|
| 160936_at   | 1397.6 | 1347.1 | 1417.3 | 1018.7 | 1141.9 | 1587.4 | 1028.6 | 1199   | 0.728086742 | 1295.175 | 1239.225 | 55.95   | 1.045149186 | 0.7      | -1.05  |
| 160937_at   | 64.2   | 25.2   | 45.2   | 12.6   | 7.3    | 8.8    | 8.6    | 4.9    | 0.080343121 | 36.8     | 7.4      | 29.4    | 4.972972973 | 0.008831 | -4.286 |
| 160938_at   | 299.7  | 486.7  | 396.5  | 473.4  | 425.5  | 405.1  | 424.1  | 387.7  | 0.94154248  | 414.075  | 410.6    | 3.475   | 1.008463225 | 0.9424   | -1.009 |
| 160939_at   | 467.4  | 653.3  | 620.1  | 399.1  | 578.9  | 478.2  | 402.9  | 664.6  | 0.964943952 | 534.975  | 531.15   | 3.825   | 1.007201356 | 0.9768   | -1.005 |
| 160940_at   | 37.5   | 20.9   | 13.7   | 20.2   | 23.6   | 14.3   | 22.6   | 70     | 0.522144021 | 23.075   | 32.625   | 9.55    | 0.707279693 | 0.5918   | 1.251  |
| 160941_at   | 123.4  | 166.4  | 147.8  | 162.6  | 106    | 148.2  | 187.3  | 159.8  | 0.989319514 | 150.05   | 150.325  | 0.275   | 0.99817063  | 0.9316   | -1.012 |
| 160942_at   | 144.9  | 382.4  | 266.6  | 362.2  | 250    | 311.4  | 326.2  | 358.6  | 0.721280946 | 289.025  | 311.55   | 22.525  | 0.927700209 | 0.5927   | 1.142  |
| 160943_at   | 19.6   | 28.9   | 26.8   | 63.5   | 27.5   | 117.1  | 74.7   | 218.3  | 0.162388003 | 34.7     | 109.4    | 74.7    | 0.317184644 | 0.09368  | 2.719  |
| 160944_at   | 9.7    | 9      | 15.4   | 11.1   | 15.3   | 10     | 18.2   | 19     | 0.138801849 | 11.3     | 15.625   | 4.325   | 0.7232      | 0.1412   | 1.374  |
| 160945_at   | 4.2    | 26.1   | 20.5   | 14.7   | 11.5   | 29.9   | 7.8    | 2.8    | 0.670792513 | 16.375   | 13       | 3.375   | 1.259615385 | 0.5835   | -1.448 |
| 160946_at   | 4.7    | 18     | 18.1   | 24.2   | 10.2   | 20.7   | 4.7    | 9.1    | 0.379122607 | 16.25    | 11.175   | 5.075   | 1.454138702 | 0.4912   | -1.42  |
| 160947_at   | 77.5   | 100.9  | 80.1   | 99.5   | 106.6  | 101.1  | 132.6  | 131.7  | 0.035451382 | 89.5     | 118      | 28.5    | 0.758474576 | 0.03159  | 1.319  |
| 160948_at   | 163.2  | 157.2  | 163.2  | 198.9  | 328.1  | 206.5  | 222.8  | 203.9  | 0.095286015 | 170.625  | 240.325  | 69.7    | 0.709976074 | 0.03893  | 1.387  |
| 160949_at   | 1061.9 | 876.7  | 875.9  | 1113.6 | 600.3  | 1170   | 901.4  | 1057.3 | 0.735379529 | 982.025  | 932.25   | 49.775  | 1.05339233  | 0.6501   | -1.079 |
| 160950_at   | 10.8   | 29.1   | 20.4   | 6.5    | 14     | 26.3   | 21.9   | 36.3   | 0.292592219 | 16.7     | 24.625   | 7.925   | 0.678172589 | 0.2548   | 1.63   |
| 160951_at   | 11.4   | 34.6   | 48.5   | 38.4   | 13.7   | 41.9   | 71.7   | 20.4   | 0.817907608 | 33.225   | 36.925   | 3.7     | 0.899796886 | 0.9448   | -1.036 |
| 160952_r_at | 25.5   | 18.5   | 2      | 9      | 27.5   | 6.4    | 5.9    | 1.7    | 0.679634102 | 13.75    | 10.375   | 3.375   | 1.325301205 | 0.6466   | -1.477 |
| 160953_at   | 44.5   | 53.2   | 34.4   | 55.8   | 8.7    | 18.3   | 16.1   | 22.1   | 0.003080736 | 46.975   | 16.3     | 30.675  | 2.88190184  | 0.003176 | -2.991 |
| 160954_at   | 107.8  | 154.9  | 103.6  | 151.9  | 96.7   | 135.9  | 124.4  | 179.5  | 0.842959914 | 129.55   | 134.125  | 4.575   | 0.965890028 | 0.875    | -1.028 |
| 160955_at   | 955.8  | 799.7  | 819.3  | 914.1  | 1142.2 | 697.9  | 877.4  | 738.4  | 0.94248535  | 872.225  | 863.975  | 8.25    | 1.009548887 | 0.8353   | -1.026 |
| 160956_r_at | 20.8   | 36.3   | 38.8   | 33.3   | 31     | 47.5   | 41.5   | 25.8   | 0.537952177 | 32.3     | 36.45    | 4.15    | 0.886145405 | 0.5657   | 1.128  |
| 160957_at   | 104.7  | 190.2  | 156.2  | 174.7  | 222    | 159.1  | 182.5  | 228.8  | 0.145832969 | 156.45   | 198.1    | 41.65   | 0.78975265  | 0.1639   | 1.284  |
| 160958_at   | 681    | 581.3  | 624.1  | 513.5  | 629.6  | 679.6  | 675.1  | 643.8  | 0.207027519 | 599.975  | 657.025  | 57.05   | 0.91316921  | 0.177    | -1.1   |
| 160959_at   | 311.9  | 348.5  | 371.4  | 381.4  | 334.4  | 480.5  | 369.5  | 412.5  | 0.254539211 | 353.3    | 399.225  | 45.925  | 0.884964619 | 0.2434   | 1.123  |
| 160960_at   | 373.5  | 327.7  | 290.5  | 411.3  | 297.1  | 323.9  | 327.9  | 385.8  | 0.618175523 | 350.75   | 333.675  | 17.075  | 1.051172548 | 0.6408   | -1.047 |
| 160961_at   | 190.1  | 303.6  | 261.5  | 247.2  | 267    | 350    | 297.8  | 373.1  | 0.078353972 | 250.6    | 321.975  | 71.375  | 0.778321298 | 0.08411  | 1.292  |
| 160962_at   | 1025.4 | 1039.8 | 1003.4 | 982.4  | 660.8  | 790.9  | 729.6  | 839.5  | 0.004398218 | 1012.75  | 755.2    | 257.55  | 1.341035487 | 0.001418 | -1.346 |
| 160963_at   | 621.7  | 850.3  | 803.1  | 836.8  | 635.2  | 958.5  | 840.3  | 1128.7 | 0.382665333 | 777.975  | 890.675  | 112.7   | 0.873466753 | 0.425    | 1.129  |
| 160964_at   | 437.3  | 500.4  | 590    | 617.5  | 617    | 807.8  | 709.1  | 774.9  | 0.017824724 | 536.3    | 727.2    | 190.9   | 0.737486249 | 0.02073  | 1.361  |
| 160965_at   | 257    | 340.9  | 296.8  | 226.3  | 400.5  | 450.7  | 470.5  | 378.9  | 0.00468904  | 280.25   | 425.15   | 144.9   | 0.659179113 | 0.005925 | 1.529  |
| 160966_at   | 426.3  | 345.7  | 341.9  | 572.5  | 410.8  | 383.9  | 438.9  | 440.9  | 0.960334388 | 421.6    | 418.625  | 2.975   | 1.007106599 | 0.9141   | -1.014 |
| 160967_at   | 132.6  | 131.5  | 172.2  | 158.1  | 112.2  | 153    | 126.4  | 171.9  | 0.660779677 | 148.6    | 140.875  | 7.725   | 1.054835847 | 0.6232   | -1.062 |
| 160968_at   | 3331   | 4451.3 | 5693.4 | 5959.1 | 2588.7 | 2475.9 | 3015.4 | 2173.6 | 0.027701275 | 4858.7   | 2563.4   | 2295.3  | 1.895412343 | 0.006043 | -1.86  |
| 160969_at   | 32.4   | 79.2   | 37.6   | 77     | 73.3   | 61.5   | 98     | 64.5   | 0.286943665 | 56.55    | 74.325   | 17.775  | 0.760847629 | 0.2391   | 1.4    |
| 160970_at   | 261.2  | 238.4  | 234.4  | 340.1  | 198.7  | 317.8  | 250.1  | 461.6  | 0.567825518 | 268.525  | 307.05   | 38.525  | 0.874531835 | 0.648    | -1.101 |
| 160971_at   | 2427.9 | 2729.3 | 2433.6 | 2510.8 | 3444.8 | 2666.9 | 2853.1 | 2735.5 | 0.105807785 | 2525.4   | 2925.075 | 399.675 | 0.863362478 | 0.06726  | 1.154  |
| 160972_at   | 36.1   | 59.2   | 56.1   | 43     | 66.1   | 43     | 63     | 64.3   | 0.220256448 | 48.6     | 59.1     | 10.5    | 0.822335025 | 0.2408   | 1.222  |
| 160973_at   | 816.6  | 629.8  | 560.3  | 751.6  | 550.5  | 488.2  | 485.2  | 489    | 0.044178646 | 689.575  | 503.225  | 186.35  | 1.370311491 | 0.01478  | -1.358 |
| 160974_at   | 182.4  | 146.2  | 158.2  | 137.7  | 217.1  | 132    | 208.5  | 248.7  | 0.164325519 | 156.125  | 201.575  | 45.45   | 0.774525611 | 0.1692   | 1.265  |
| 160975_at   | 138.3  | 304.4  | 202.9  | 311    | 183.7  | 215.8  | 192.9  | 144.8  | 0.287500233 | 239.15   | 184.3    | 54.85   | 1.297612588 | 0.3374   | -1.245 |
| 160976_at   | 111.1  | 231    | 150.4  | 159.4  | 156.2  | 162.5  | 172.8  | 108.1  | 0.669774932 | 162.975  | 149.9    | 13.075  | 1.087224817 | 0.7349   | -1.067 |
| 160977_at   | 72.5   | 97.7   | 91.4   | 68.1   | 74.8   | 114    | 115.9  | 124.9  | 0.116391184 | 82.425   | 107.4    | 24.975  | 0.767458101 | 0.1269   | 1.294  |
| 160978_at   | 29.3   | 57     | 42.3   | 63     | 60.4   | 53.9   | 57.5   | 72.8   | 0.189277654 | 47.9     | 61.15    | 13.25   | 0.783319706 | 0.1783   | 1.324  |
| 160979_at   | 589.9  | 974.8  | 666.5  | 904.1  | 845.4  | 762.9  | 660.9  | 841.3  | 0.954269143 | 783.825  | 777.625  | 6.2     | 1.007972995 | 0.9509   | -1.009 |
| 160980_at   | 153.5  | 115.9  | 171.7  | 174.5  | 172.3  | 159    | 122.6  | 142    | 0.785417851 | 153.9    | 148.975  | 4.925   | 1.033059238 | 0.8266   | -1.028 |
| 160981_at   | 278.4  | 196.4  | 239.4  | 221.9  | 181.7  | 229.1  | 235.7  | 211.8  | 0.394654776 | 234.025  | 214.575  | 19.45   | 1.090644297 | 0.4049   | -1.087 |
| 160982_at   | 228.8  | 203.5  | 207.9  | 179.6  | 158.8  | 205.8  | 174.7  | 206.7  | 0.281934811 | 204.95   | 186.5    | 18.45   | 1.098927614 | 0.2805   | -1.102 |
| 160983_at   | 302.4  | 288.9  | 288.9  | 243.2  | 233.2  | 293.3  | 292.8  | 349.9  | 0.691721222 | 280.85   | 292.3    | 11.45   | 0.960827917 | 0.7419   | -1.034 |
| 160984_r_at | 18.7   | 16.6   | 27     | 19.3   | 31.2   | 20.6   | 20.1   | 10.1   | 0.9844954   | 20.4     | 20.5     | 0.1     | 0.995121951 | 0.8419   | -1.055 |
| 160985_at   | 3.7    | 27.2   | 27.8   | 4.4    | 2.8    | 3      | 5      | 16.8   | 0.299744812 | 15.775   | 6.9      | 8.875   | 2.286231884 | 0.3404   | -2.045 |
| 160986_r_at | 100.8  | 48.9   | 46.6   | 70.9   | 54.8   | 191    | 99.9   | 77.2   | 0.295656576 | 66.8     | 105.725  | 38.925  | 0.631827855 | 0.257    | 1.493  |
| 160987_r_at | 27.6   | 19.3   | 27.3   | 21.8   | 18     | 16.4   | 20.2   | 15.9   | 0.045173698 | 24       | 17.625   | 6.375   | 1.361702128 | 0.02652  | -1.352 |
| 160988_r_at | 264.1  | 201    | 261.1  | 300.4  | 281.6  | 268.8  | 284.6  | 191.8  | 0.998726965 | 256.65   | 256.7    | 0.05    | 0.99980522  | 0.9878   | -1.002 |
| 160989_r_at | 129.3  | 108.4  | 118.6  | 126.1  | 137.5  | 163.9  | 145.5  | 95.2   | 0.388935168 | 120.6    | 135.525  | 14.925  | 0.889872717 | 0.4511   | -1.105 |
| 160990_r_at | 264.6  | 171    | 199    | 340.7  | 158.7  | 205    | 127.4  | 159.6  | 0.118338656 | 243.825  | 162.675  | 81.15   | 1.498847395 | 0.0787   | -1.468 |
| 160991_at   | 412.2  | 374.4  | 451.1  | 492.1  | 413.3  | 433.6  | 479.9  | 512.8  | 0.448745963 | 432.45   | 459.9    | 27.45   | 0.940313112 | 0.4398   | -1.065 |



|             |        |        |        |        |        |        |        |        |             |         |          |         |             |          |        |
|-------------|--------|--------|--------|--------|--------|--------|--------|--------|-------------|---------|----------|---------|-------------|----------|--------|
| 160992_at   | 61.5   | 47.7   | 50     | 88.5   | 36.5   | 50.4   | 57     | 85.9   | 0.76005392  | 61.925  | 57.45    | 4.475   | 1.077893821 | 0.7007   | -1.095 |
| 160993_at   | 46.6   | 27.2   | 37.5   | 51.1   | 35.4   | 40.9   | 42.4   | 52.8   | 0.736520424 | 40.6    | 42.875   | 2.275   | 0.946938776 | 0.6754   | -1.074 |
| 160994_at   | 292.7  | 260.8  | 271.8  | 352.2  | 246    | 286.5  | 319.8  | 445.4  | 0.560269472 | 294.375 | 324.425  | 30.05   | 0.907374586 | 0.5968   | -1.083 |
| 160995_at   | 180.7  | 216.9  | 292.7  | 163.1  | 303.8  | 247.2  | 306.8  | 100.3  | 0.661842781 | 213.35  | 239.525  | 26.175  | 0.890721219 | 0.8634   | -1.054 |
| 160996_at   | 19.4   | 15.1   | 23.1   | 31.7   | 24.3   | 24     | 27.5   | 35.6   | 0.263012522 | 22.325  | 27.85    | 5.525   | 0.801615799 | 0.2248   | 1.278  |
| 160997_at   | 88     | 175.6  | 185.1  | 140.2  | 77.7   | 148.5  | 106.6  | 134.4  | 0.307076369 | 147.225 | 116.8    | 30.425  | 1.260488014 | 0.3573   | -1.248 |
| 160998_at   | 855.4  | 640.9  | 782.6  | 774.6  | 655.6  | 842.6  | 703.3  | 827.2  | 0.926157592 | 763.375 | 757.175  | 6.2     | 1.008188332 | 0.9253   | -1.008 |
| 160999_r_at | 250.1  | 175.1  | 185.8  | 303.2  | 150.7  | 210.6  | 261.3  | 217    | 0.638299678 | 228.55  | 209.9    | 18.65   | 1.088851834 | 0.6634   | -1.082 |
| 161000_i_at | 2190.5 | 1748.6 | 1883.2 | 1586.3 | 1072.4 | 1440.7 | 1363.6 | 1002.5 | 0.009671579 | 1852.15 | 1219.8   | 632.35  | 1.518404657 | 0.009221 | -1.526 |
| 161001_at   | 227.6  | 181.4  | 215.1  | 188.5  | 267.6  | 216.6  | 360.8  | 182.5  | 0.263322326 | 203.15  | 256.875  | 53.725  | 0.790851582 | 0.2357   | 1.229  |
| 161002_at   | 171.8  | 178.3  | 159.3  | 195.2  | 140.6  | 142    | 183.4  | 183.8  | 0.382898856 | 176.15  | 162.45   | 13.7    | 1.084333641 | 0.3539   | -1.091 |
| 161003_at   | 166    | 162.3  | 209.9  | 238.1  | 145.6  | 157.9  | 166.3  | 167.5  | 0.151161797 | 194.075 | 159.325  | 34.75   | 1.218107642 | 0.1078   | -1.204 |
| 161004_at   | 271.4  | 284.1  | 399.5  | 399.9  | 457.6  | 371.8  | 416.3  | 383.6  | 0.15317067  | 338.725 | 407.325  | 68.6    | 0.831584116 | 0.1373   | 1.219  |
| 161005_at   | 731.8  | 750    | 890.1  | 736.9  | 811.6  | 805.9  | 748.2  | 683.3  | 0.767714661 | 777.2   | 762.25   | 14.95   | 1.019612988 | 0.7743   | -1.019 |
| 161006_at   | 180.3  | 302.2  | 220.4  | 253.9  | 145.2  | 144    | 134.3  | 161.7  | 0.033794342 | 239.2   | 146.3    | 92.9    | 1.634996582 | 0.006304 | -1.61  |
| 161007_at   | 178.4  | 146    | 199.6  | 128.5  | 135.3  | 108.1  | 162.3  | 145.5  | 0.248410687 | 163.125 | 137.8    | 25.325  | 1.183780842 | 0.2551   | -1.179 |
| 161008_at   | 17.2   | 16.5   | 22.2   | 27.2   | 27.1   | 22     | 16.6   | 65.7   | 0.362014888 | 20.775  | 32.85    | 12.075  | 0.632420091 | 0.3361   | 1.396  |
| 161009_at   | 103.8  | 88.9   | 113.1  | 109.7  | 64.1   | 115.7  | 108.8  | 169    | 0.663792071 | 103.875 | 114.4    | 10.525  | 0.907998252 | 0.8398   | -1.045 |
| 161010_r_at | 43.8   | 55.8   | 39.1   | 30.5   | 51.1   | 25.7   | 49.3   | 45.8   | 0.93460932  | 42.3    | 42.975   | 0.675   | 0.984293194 | 0.983    | -1.005 |
| 161011_at   | 243.7  | 511.5  | 343.2  | 362.1  | 166.8  | 291.6  | 266.5  | 240.4  | 0.10869555  | 365.125 | 241.325  | 123.8   | 1.51300114  | 0.08562  | -1.493 |
| 161012_at   | 15.6   | 55.5   | 35.7   | 41.5   | 98.6   | 14.4   | 24.9   | 25.1   | 0.870286485 | 37.075  | 40.75    | 3.675   | 0.909815951 | 0.8557   | -1.098 |
| 161013_f_at | 932.7  | 1062.3 | 759.1  | 1122   | 469.6  | 780.1  | 584.1  | 843.4  | 0.044342374 | 969.025 | 669.3    | 299.725 | 1.447818616 | 0.05304  | -1.47  |
| 161014_at   | 202    | 244.2  | 184    | 180.7  | 115.1  | 229.7  | 165.8  | 193    | 0.385675018 | 202.725 | 175.9    | 26.825  | 1.152501421 | 0.3477   | -1.18  |
| 161015_at   | 10.1   | 6.3    | 19.7   | 9.5    | 17.8   | 15.2   | 14.8   | 20.4   | 0.146264219 | 11.4    | 17.05    | 5.65    | 0.668621701 | 0.1      | 1.619  |
| 161016_at   | 274.6  | 267.7  | 238.3  | 420.9  | 189.7  | 300.3  | 247.6  | 337.1  | 0.565854442 | 300.375 | 268.675  | 31.7    | 1.117986415 | 0.5578   | -1.116 |
| 161017_at   | 20.4   | 21.7   | 61.4   | 30.3   | 22.4   | 55.5   | 30.9   | 33.1   | 0.870893062 | 33.45   | 35.475   | 2.025   | 0.942917548 | 0.7407   | 1.115  |
| 161018_at   | 235.7  | 268.4  | 265.8  | 223.5  | 391.6  | 329    | 342.7  | 283    | 0.020610831 | 248.35  | 336.575  | 88.225  | 0.737874174 | 0.00981  | 1.35   |
| 161019_at   | 309.2  | 304.4  | 266.9  | 354.5  | 232.3  | 285.8  | 262.3  | 311.3  | 0.195847661 | 308.75  | 272.925  | 35.825  | 1.131263168 | 0.1962   | -1.132 |
| 161020_r_at | 33.2   | 27.1   | 32.9   | 18     | 39.8   | 14.8   | 38.1   | 12.4   | 0.860143598 | 27.8    | 26.275   | 1.525   | 1.058039962 | 0.6476   | -1.177 |
| 161021_at   | 513.1  | 419    | 406.4  | 458.7  | 579.5  | 457    | 529.9  | 400.7  | 0.400070355 | 449.3   | 491.775  | 42.475  | 0.9136292   | 0.4152   | -1.088 |
| 161022_at   | 26.7   | 50.1   | 42.5   | 82.2   | 110.9  | 54.7   | 20.2   | 20.5   | 0.962742439 | 50.375  | 51.575   | 1.2     | 0.976732913 | 0.7543   | -1.168 |
| 161023_at   | 396.6  | 342.1  | 399.3  | 402.7  | 471.7  | 309.4  | 351.9  | 461.3  | 0.770429427 | 385.175 | 398.575  | 13.4    | 0.96638023  | 0.8586   | -1.021 |
| 161024_at   | 103.5  | 112.5  | 116.1  | 143.5  | 166.2  | 157.3  | 190.3  | 159.3  | 0.005278106 | 118.9   | 168.275  | 49.375  | 0.706581489 | 0.005177 | 1.422  |
| 161025_f_at | 711    | 984.3  | 710    | 763.4  | 547.4  | 732.7  | 595.9  | 390.6  | 0.057614211 | 792.175 | 566.65   | 225.525 | 1.397997    | 0.06073  | -1.42  |
| 161026_s_at | 759.8  | 622.3  | 751.6  | 742.9  | 603.3  | 781.5  | 896.5  | 679.9  | 0.780315985 | 719.15  | 740.3    | 21.15   | 0.971430501 | 0.8357   | -1.021 |
| 161027_f_at | 56.5   | 93.5   | 9.9    | 5.4    | 80.1   | 30     | 29.5   | 60.5   | 0.73496901  | 41.325  | 50.025   | 8.7     | 0.826086957 | 0.3863   | 1.973  |
| 161028_at   | 191.8  | 280.6  | 244.1  | 218.6  | 185.6  | 345    | 290.7  | 361.2  | 0.227219221 | 233.775 | 295.625  | 61.85   | 0.790782241 | 0.2631   | 1.237  |
| 161029_at   | 78.4   | 126.1  | 83.8   | 115.8  | 105.3  | 168.9  | 138.1  | 150.7  | 0.068102451 | 101.025 | 140.75   | 39.725  | 0.717761989 | 0.07187  | 1.402  |
| 161030_at   | 1449.2 | 1619.6 | 1521.4 | 1314.8 | 977.8  | 1079.1 | 1293.1 | 860.1  | 0.011275927 | 1476.25 | 1052.525 | 423.725 | 1.402579511 | 0.0115   | -1.414 |
| 161031_at   | 73.8   | 83.3   | 95.3   | 74.9   | 56.7   | 87     | 93.2   | 57.4   | 0.484300052 | 81.825  | 73.575   | 8.25    | 1.112130479 | 0.4135   | -1.136 |
| 161032_i_at | 40.1   | 26.6   | 75.4   | 60.8   | 23.2   | 78.9   | 96.2   | 84.6   | 0.350628215 | 50.725  | 70.725   | 20      | 0.717214563 | 0.5159   | 1.321  |
| 161033_at   | 18.2   | 29.6   | 9.7    | 41.2   | 21.7   | 16.2   | 47.6   | 10.1   | 0.944808382 | 24.675  | 23.9     | 0.775   | 1.032426778 | 0.8941   | -1.065 |
| 161034_at   | 134.5  | 137.5  | 52.6   | 40.2   | 109.9  | 157.1  | 146.3  | 147    | 0.156930384 | 91.2    | 140.075  | 48.875  | 0.651079779 | 0.1367   | 1.756  |
| 161035_at   | 2.7    | 5.8    | 14.8   | 5.4    | 2.3    | 10.8   | 6.1    | 15.4   | 0.716675509 | 7.175   | 8.65     | 1.475   | 0.829479769 | 0.7946   | 1.16   |
| 161036_at   | 67.6   | 96.7   | 112.3  | 78.6   | 92.4   | 78.8   | 124.3  | 113.5  | 0.380912437 | 88.8    | 102.25   | 13.45   | 0.868459658 | 0.3779   | 1.155  |
| 161037_at   | 19.8   | 13     | 21.8   | 20.8   | 43.9   | 18.7   | 29.7   | 34     | 0.087537207 | 18.85   | 31.575   | 12.725  | 0.596991291 | 0.06281  | 1.633  |
| 161038_at   | 94.9   | 51     | 79.6   | 76     | 59.3   | 101.1  | 66.8   | 62.1   | 0.82641292  | 75.375  | 72.325   | 3.05    | 1.042170757 | 0.8271   | -1.042 |
| 161039_at   | 20     | 29.5   | 34.8   | 15.5   | 45.4   | 22.7   | 29.1   | 24.3   | 0.456128878 | 24.95   | 30.375   | 5.425   | 0.821399177 | 0.4228   | 1.231  |
| 161040_at   | 41.1   | 82.2   | 78.2   | 87     | 66.1   | 97.5   | 66.6   | 83.6   | 0.643660462 | 72.125  | 78.45    | 6.325   | 0.919375398 | 0.5963   | -1.118 |
| 161041_at   | 363.7  | 346.2  | 298.2  | 289.6  | 329.2  | 328.3  | 310.6  | 493.1  | 0.428343699 | 324.425 | 365.3    | 40.875  | 0.888105667 | 0.4172   | 1.111  |
| 161042_at   | 187.6  | 148.4  | 214    | 115    | 305.1  | 291.6  | 359.1  | 154.6  | 0.077796747 | 166.25  | 277.6    | 111.35  | 0.598883285 | 0.07552  | 1.639  |
| 161043_r_at | 7.3    | 18.4   | 9      | 12.9   | 20.9   | 9.2    | 28.6   | 15.1   | 0.233410835 | 11.9    | 18.45    | 6.55    | 0.64498645  | 0.2334   | 1.52   |
| 161044_at   | 252.8  | 404.8  | 321.8  | 419.7  | 382.3  | 367.8  | 478    | 505.8  | 0.15827606  | 349.775 | 433.475  | 83.7    | 0.80690928  | 0.1638   | 1.252  |
| 161045_at   | 128.4  | 117.3  | 113.2  | 107.7  | 181.5  | 163.4  | 180.3  | 195.9  | 0.000414935 | 116.65  | 180.275  | 63.625  | 0.647066981 | 0.000167 | 1.546  |
| 161046_at   | 110.5  | 161.1  | 131.4  | 180.4  | 47.3   | 101.4  | 128.7  | 78     | 0.049999994 | 145.85  | 88.85    | 57      | 1.64153067  | 0.06495  | -1.72  |
| 161047_at   | 41.5   | 38.9   | 42.8   | 66.5   | 19.8   | 67.9   | 12.4   | 17     | 0.272243872 | 47.425  | 29.275   | 18.15   | 1.619982921 | 0.1264   | -2.005 |



|             |        |        |        |        |        |        |        |        |             |          |          |         |             |         |        |
|-------------|--------|--------|--------|--------|--------|--------|--------|--------|-------------|----------|----------|---------|-------------|---------|--------|
| 161048_at   | 9.1    | 13.2   | 28.9   | 34.6   | 15.2   | 10.6   | 16.7   | 21.1   | 0.443702886 | 21.45    | 15.9     | 5.55    | 1.349056604 | 0.6068  | -1.208 |
| 161049_at   | 2.2    | 8.7    | 18.5   | 2.5    | 7.1    | 4.6    | 3.2    | 4.4    | 0.473962965 | 7.975    | 4.825    | 3.15    | 1.652849741 | 0.778   | -1.172 |
| 161050_at   | 873.7  | 1303.7 | 1046.2 | 982.2  | 862.7  | 987.3  | 1013.2 | 1212.4 | 0.789826039 | 1051.45  | 1018.9   | 32.55   | 1.031946217 | 0.806   | -1.028 |
| 161051_at   | 30.9   | 36.7   | 51.3   | 29.5   | 46.2   | 43.3   | 49.9   | 36.8   | 0.280519131 | 37.1     | 44.05    | 6.95    | 0.842224745 | 0.2266  | 1.209  |
| 161052_r_at | 210.1  | 143.2  | 164.1  | 149.9  | 273.5  | 178.9  | 142.1  | 124    | 0.743200056 | 166.825  | 179.625  | 12.8    | 0.928740431 | 0.8497  | -1.039 |
| 161053_at   | 1.9    | 5.1    | 4.6    | 3.3    | 6.5    | 3.8    | 2.6    | 13.4   | 0.329258632 | 3.725    | 6.575    | 2.85    | 0.566539924 | 0.3459  | 1.534  |
| 161054_at   | 36.9   | 93.2   | 58     | 69.1   | 56.9   | 53.7   | 55.2   | 74.4   | 0.754316691 | 64.3     | 60.05    | 4.25    | 1.070774355 | 0.915   | -1.023 |
| 161055_r_at | 25.1   | 11.8   | 20.7   | 16.5   | 18.9   | 22.8   | 30.2   | 24.6   | 0.181760602 | 18.525   | 24.125   | 5.6     | 0.767875648 | 0.1785  | 1.333  |
| 161056_at   | 466.2  | 429.2  | 512.1  | 480.2  | 418.2  | 458.1  | 498    | 481.2  | 0.752354209 | 471.925  | 463.875  | 8.05    | 1.017353813 | 0.7536  | -1.017 |
| 161057_at   | 124.6  | 110.9  | 149    | 153.7  | 120.3  | 125.9  | 85.3   | 129.2  | 0.225108752 | 134.55   | 115.175  | 19.375  | 1.16822227  | 0.2436  | -1.174 |
| 161058_f_at | 120.8  | 120.5  | 117.6  | 82.2   | 90.4   | 117.2  | 123.8  | 134.2  | 0.660081876 | 110.275  | 116.4    | 6.125   | 0.947379725 | 0.6748  | -1.058 |
| 161059_at   | 31.5   | 36.6   | 42     | 67.5   | 69.1   | 72.7   | 31.6   | 54.9   | 0.342610995 | 44.4     | 57.075   | 12.675  | 0.777923784 | 0.3678  | 1.278  |
| 161060_i_at | 153.1  | 140.4  | 223.5  | 205.8  | 181.2  | 230    | 188.7  | 200.1  | 0.438928614 | 180.7    | 200      | 19.3    | 0.9035      | 0.3843  | 1.123  |
| 161061_r_at | 22.6   | 33.1   | 45.7   | 46.1   | 43.8   | 45     | 36.1   | 57.4   | 0.272107529 | 36.875   | 45.575   | 8.7     | 0.809105869 | 0.2635  | 1.27   |
| 161062_r_at | 127.5  | 198.9  | 139.8  | 113.4  | 107.9  | 174.2  | 76.7   | 97.9   | 0.318367582 | 144.9    | 114.175  | 30.725  | 1.269104445 | 0.2601  | -1.299 |
| 161063_r_at | 1058.9 | 1158.5 | 1392.8 | 1264.4 | 1701.3 | 1313.4 | 1577.9 | 1452.3 | 0.038128841 | 1218.65  | 1511.225 | 292.575 | 0.806398782 | 0.03712 | 1.241  |
| 161064_f_at | 249.5  | 287.5  | 177.8  | 262.8  | 380.4  | 301.2  | 304.7  | 436.9  | 0.035895963 | 244.4    | 355.8    | 111.4   | 0.686902754 | 0.03401 | 1.46   |
| 161065_at   | 142.6  | 169.3  | 144.9  | 106.8  | 102.1  | 149    | 150.5  | 184.5  | 0.800833474 | 140.9    | 146.525  | 5.625   | 0.961610647 | 0.8506  | -1.031 |
| 161066_at   | 72.8   | 63.4   | 61.3   | 96.1   | 98.4   | 83     | 90     | 81.7   | 0.162571853 | 73.4     | 88.275   | 14.875  | 0.831492495 | 0.1238  | 1.219  |
| 161067_at   | 45     | 93.9   | 66.8   | 61.5   | 80.4   | 83.6   | 32.2   | 25.4   | 0.563290473 | 66.8     | 55.4     | 11.4    | 1.205776173 | 0.4337  | -1.334 |
| 161068_at   | 102    | 87.2   | 138.6  | 139.1  | 61     | 96.8   | 82.5   | 101.3  | 0.103234994 | 116.725  | 85.4     | 31.325  | 1.366803279 | 0.1051  | -1.365 |
| 161069_at   | 5.7    | 1.8    | 10.4   | 3.7    | 3.3    | 11.3   | 4.7    | 13     | 0.412626861 | 5.4      | 8.075    | 2.675   | 0.66873065  | 0.4112  | 1.557  |
| 161070_at   | 209.6  | 359.4  | 242    | 343.6  | 174.1  | 291.5  | 257.5  | 258.1  | 0.374443417 | 288.65   | 245.3    | 43.35   | 1.176722381 | 0.4059  | -1.168 |
| 161071_at   | 201.7  | 133    | 159.9  | 142    | 121.1  | 132.6  | 129.6  | 177.5  | 0.377176852 | 159.15   | 140.2    | 18.95   | 1.135164051 | 0.3534  | -1.134 |
| 161072_at   | 26.5   | 35     | 25.6   | 46.6   | 70.9   | 32.9   | 45.4   | 116.1  | 0.170660338 | 33.425   | 66.325   | 32.9    | 0.503957784 | 0.09833 | 1.826  |
| 161073_at   | 470.5  | 630.2  | 884    | 471.5  | 524.7  | 621    | 638.4  | 704.7  | 0.94162574  | 614.05   | 622.2    | 8.15    | 0.986901318 | 0.8009  | -1.044 |
| 161074_at   | 498.8  | 448.3  | 433.4  | 512.8  | 404.8  | 491.5  | 556    | 381.6  | 0.754520223 | 473.325  | 458.475  | 14.85   | 1.032389989 | 0.6858  | -1.042 |
| 161075_at   | 133.5  | 175.8  | 108.6  | 114.4  | 95.7   | 129.1  | 142.7  | 143.6  | 0.789149355 | 133.075  | 127.775  | 5.3     | 1.041479163 | 0.8153  | -1.036 |
| 161076_at   | 1351.2 | 793.3  | 889.8  | 1127.4 | 856.3  | 792.5  | 797.5  | 901.8  | 0.202554247 | 1040.425 | 837.025  | 203.4   | 1.243003495 | 0.1602  | -1.218 |
| 161077_f_at | 1444.9 | 1990.3 | 1708.4 | 1562.5 | 2192.5 | 1925.5 | 2066.8 | 2168.8 | 0.030637031 | 1676.525 | 2088.4   | 411.875 | 0.80277964  | 0.02355 | 1.253  |
| 161078_at   | 97.1   | 63.8   | 97.7   | 104.5  | 60.9   | 89.9   | 101.4  | 67.3   | 0.440067514 | 90.775   | 79.875   | 10.9    | 1.136463224 | 0.4551  | -1.14  |
| 161079_at   | 283.1  | 196.2  | 213.3  | 248.4  | 220.3  | 274.5  | 258    | 202.9  | 0.889817029 | 235.25   | 238.925  | 3.675   | 0.984618604 | 0.8707  | -1.018 |
| 161080_f_at | 82.5   | 188.2  | 100    | 132.5  | 104.7  | 83.2   | 134    | 135.3  | 0.682821305 | 125.8    | 114.3    | 11.5    | 1.100612423 | 0.7672  | -1.068 |
| 161081_at   | 122.2  | 93.8   | 127.6  | 122.8  | 169.5  | 149.3  | 169.4  | 170.4  | 0.003058519 | 116.6    | 164.65   | 48.05   | 0.708168843 | 0.00406 | 1.42   |
| 161082_r_at | 33.1   | 63.4   | 61     | 50.8   | 79.9   | 53.9   | 78.4   | 52.1   | 0.220632027 | 52.075   | 66.075   | 14      | 0.788119561 | 0.2355  | 1.282  |
| 161083_at   | 76     | 87.8   | 92.6   | 84.6   | 93.4   | 90.1   | 83.4   | 69.1   | 0.853057659 | 85.25    | 84       | 1.25    | 1.014880952 | 0.8214  | -1.019 |
| 161084_at   | 31.7   | 46.2   | 46.2   | 44.6   | 43.2   | 48.4   | 36.3   | 56.3   | 0.507655806 | 42.175   | 46.05    | 3.875   | 0.915852334 | 0.5283  | -1.091 |
| 161085_r_at | 459.2  | 412.2  | 469.4  | 328.9  | 713.9  | 479.4  | 450.1  | 405.7  | 0.27638803  | 417.425  | 512.275  | 94.85   | 0.814845542 | 0.2463  | 1.209  |
| 161086_at   | 148.2  | 98.3   | 143.3  | 197.4  | 89.2   | 158    | 101.4  | 94     | 0.213371537 | 146.8    | 110.65   | 36.15   | 1.326705829 | 0.198   | -1.323 |
| 161087_r_at | 9      | 6.4    | 8.1    | 40.6   | 36.1   | 15.8   | 15.3   | 5.5    | 0.843832484 | 16.025   | 18.175   | 2.15    | 0.88170564  | 0.699   | 1.259  |
| 161088_r_at | 42.2   | 29.5   | 36.4   | 42.9   | 41.9   | 41.9   | 35.4   | 38     | 0.678093583 | 37.75    | 39.3     | 1.55    | 0.960559796 | 0.6305  | -1.05  |
| 161089_r_at | 1.6    | 0.4    | 0.2    | 0.4    | 0.8    | 8.4    | 2.6    | 5.6    | 0.112229111 | 0.65     | 4.35     | 3.7     | 0.149425287 | 0.03626 | 6.686  |
| 161090_i_at | 90.3   | 82.1   | 186.2  | 204.5  | 101    | 156.7  | 132.4  | 95.6   | 0.607080459 | 140.775  | 121.425  | 19.35   | 1.159357628 | 0.7568  | -1.09  |
| 161091_r_at | 45     | 51.5   | 71.1   | 7.8    | 71.6   | 21.9   | 46     | 33.8   | 0.976377422 | 43.85    | 43.325   | 0.525   | 1.012117715 | 0.7829  | 1.174  |
| 161092_at   | 657.4  | 522.2  | 631.9  | 589.7  | 695.4  | 598    | 630.3  | 619.8  | 0.367812197 | 600.3    | 635.875  | 35.575  | 0.94405347  | 0.3568  | -1.062 |
| 161093_at   | 61.3   | 50.9   | 62.4   | 58     | 70.5   | 64.4   | 64.3   | 71.5   | 0.028209005 | 58.15    | 67.675   | 9.525   | 0.859253786 | 0.02995 | 1.166  |
| 161094_r_at | 20.6   | 29.6   | 14.9   | 13.9   | 18     | 18     | 17.9   | 20.6   | 0.777448906 | 19.75    | 18.625   | 1.125   | 1.060402685 | 0.9411  | -1.014 |
| 161095_i_at | 2      | 1.5    | 2.5    | 2.8    | 2.3    | 2      | 2.9    | 3.2    | 0.351287325 | 2.2      | 2.6      | 0.4     | 0.846153846 | 0.3447  | 1.194  |
| 161096_at   | 218.9  | 258.3  | 240    | 243.2  | 161.4  | 275.4  | 179.2  | 309    | 0.824755093 | 240.1    | 231.25   | 8.85    | 1.03827027  | 0.6681  | -1.076 |
| 161097_at   | 36.5   | 42.7   | 25.9   | 33.8   | 56.8   | 48     | 23.1   | 26.6   | 0.68341014  | 34.725   | 38.625   | 3.9     | 0.899029126 | 0.8397  | -1.053 |
| 161098_at   | 8.6    | 45.5   | 38     | 35.3   | 80.2   | 49.1   | 15.5   | 10.6   | 0.717084717 | 31.85    | 38.85    | 7       | 0.81981982  | 0.9369  | -1.052 |
| 161099_at   | 176.9  | 265.3  | 212.1  | 195.4  | 174.8  | 231.5  | 213    | 270    | 0.730851158 | 212.425  | 222.325  | 9.9     | 0.955470595 | 0.7309  | -1.046 |
| 161100_at   | 113.5  | 243.1  | 137.1  | 210.6  | 151.7  | 198.7  | 189.2  | 202.1  | 0.788805692 | 176.075  | 185.425  | 9.35    | 0.9495753   | 0.6452  | -1.097 |
| 161101_r_at | 67.6   | 89.4   | 103.5  | 87.2   | 114.2  | 84.8   | 141    | 69.5   | 0.424563057 | 86.925   | 102.375  | 15.45   | 0.849084249 | 0.4713  | 1.148  |
| 161102_at   | 2      | 4      | 4.2    | 7      | 4.7    | 3.4    | 7.2    | 7.5    | 0.364710194 | 4.3      | 5.7      | 1.4     | 0.754385965 | 0.3386  | 1.388  |
| 161103_at   | 103.8  | 96.6   | 111.2  | 110.3  | 166.3  | 127.9  | 109.2  | 141.8  | 0.078722549 | 105.475  | 136.3    | 30.825  | 0.773844461 | 0.03952 | 1.28   |



|             |        |        |        |        |        |        |        |        |             |          |          |         |             |         |        |
|-------------|--------|--------|--------|--------|--------|--------|--------|--------|-------------|----------|----------|---------|-------------|---------|--------|
| 161104_at   | 1909.8 | 2569.1 | 2069.4 | 2209.5 | 3214.1 | 1706.7 | 1810.7 | 2187.1 | 0.919094371 | 2189.45  | 2229.65  | 40.2    | 0.981970264 | 0.9605  | -1.008 |
| 161105_at   | 69     | 84.8   | 80.5   | 69.5   | 94.9   | 71.4   | 81.1   | 92.7   | 0.231657694 | 75.95    | 85.025   | 9.075   | 0.893266686 | 0.2367  | -1.117 |
| 161106_r_at | 20.6   | 10.7   | 48.5   | 31.7   | 68.7   | 26     | 20.7   | 20.1   | 0.689482805 | 27.875   | 33.875   | 6       | 0.822878229 | 0.6665  | 1.216  |
| 161107_r_at | 34.1   | 11.7   | 1.4    | 25.3   | 8.3    | 32.1   | 20.1   | 21.3   | 0.799842539 | 18.125   | 20.45    | 2.325   | 0.886308068 | 0.5268  | 1.678  |
| 161108_r_at | 105.8  | 209.3  | 225.7  | 113.7  | 356.2  | 145.5  | 255.9  | 210.1  | 0.204468627 | 163.625  | 241.925  | 78.3    | 0.676345975 | 0.1953  | 1.488  |
| 161109_at   | 57.5   | 54.3   | 58.3   | 81.4   | 82.6   | 43.1   | 89.7   | 63.6   | 0.597075865 | 62.875   | 69.75    | 6.875   | 0.901433692 | 0.6906  | -1.082 |
| 161110_at   | 193.8  | 124.8  | 178.1  | 157.6  | 152.3  | 210.4  | 163.1  | 208.5  | 0.382260081 | 163.575  | 183.575  | 20      | 0.891052703 | 0.3868  | 1.126  |
| 161111_f_at | 3591.1 | 5072.3 | 3878.8 | 4140.7 | 4736.3 | 3637.1 | 4015.6 | 4265.5 | 0.986299638 | 4170.725 | 4163.625 | 7.1     | 1.001705245 | 0.9825  | -1.002 |
| 161112_at   | 153.6  | 152.8  | 168.4  | 217.5  | 252.8  | 140.7  | 168.6  | 148.2  | 0.886505706 | 173.075  | 177.575  | 4.5     | 0.974658595 | 0.9592  | -1.008 |
| 161113_at   | 27.2   | 32.6   | 34.4   | 20.8   | 24.4   | 36.2   | 21.5   | 28.9   | 0.828866754 | 28.75    | 27.75    | 1       | 1.036036036 | 0.8268  | -1.037 |
| 161114_i_at | 30.2   | 20.9   | 28.4   | 19.6   | 8.4    | 24.9   | 32.3   | 34     | 0.985352978 | 24.775   | 24.9     | 0.125   | 0.99497992  | 0.7671  | -1.112 |
| 161115_r_at | 51.3   | 50.9   | 45.4   | 76     | 32.7   | 56.2   | 46.2   | 56     | 0.392807344 | 55.9     | 47.775   | 8.125   | 1.170068027 | 0.3815  | -1.174 |
| 161116_at   | 49.2   | 60.5   | 43.9   | 60.6   | 53.2   | 38.3   | 60.4   | 40.3   | 0.44685812  | 53.55    | 48.05    | 5.5     | 1.1144641   | 0.4232  | -1.124 |
| 161117_at   | 26.2   | 12.2   | 15.2   | 22.6   | 36.5   | 7.8    | 18     | 6.9    | 0.828501836 | 19.05    | 17.3     | 1.75    | 1.101156069 | 0.5349  | -1.324 |
| 161118_r_at | 5.9    | 6.9    | 0.7    | 0.4    | 1.1    | 0.8    | 0.7    | 11.6   | 0.982076042 | 3.475    | 3.55     | 0.075   | 0.978873239 | 0.936   | -1.086 |
| 161119_at   | 50.8   | 37.7   | 40.6   | 40.4   | 8.5    | 40.3   | 44.5   | 44.5   | 0.440624791 | 42.375   | 34.45    | 7.925   | 1.230043541 | 0.3873  | -1.466 |
| 161120_r_at | 312    | 320.5  | 334.6  | 306.2  | 307.7  | 284    | 357.8  | 350    | 0.743291307 | 318.325  | 324.875  | 6.55    | 0.979838399 | 0.7856  | -1.017 |
| 161121_f_at | 206.7  | 202.9  | 256.1  | 197.9  | 361.5  | 232.6  | 265.4  | 229.7  | 0.167063753 | 215.9    | 272.3    | 56.4    | 0.792875505 | 0.1191  | 1.246  |
| 161122_f_at | 1460.5 | 1381.6 | 1375   | 1189   | 1734   | 1205.3 | 1216.4 | 1137.6 | 0.859552908 | 1351.525 | 1323.325 | 28.2    | 1.021309958 | 0.7658  | -1.033 |
| 161123_i_at | 4.5    | 18.6   | 3.8    | 7.7    | 27.6   | 28.3   | 15.7   | 26.2   | 0.01334221  | 8.65     | 24.45    | 15.8    | 0.353783231 | 0.01899 | 3.391  |
| 161124_at   | 267.4  | 237.8  | 288.8  | 322.2  | 283.1  | 278.9  | 280.7  | 273.1  | 0.995886229 | 279.05   | 278.95   | 0.1     | 1.000358487 | 0.9342  | -1.006 |
| 161125_at   | 64.3   | 21.5   | 46     | 56     | 20.3   | 13.6   | 51.1   | 58.1   | 0.468706344 | 46.95    | 35.775   | 11.175  | 1.312368973 | 0.4242  | -1.445 |
| 161126_at   | 93.8   | 82     | 129.6  | 106.5  | 109.4  | 89.4   | 133.6  | 97.1   | 0.764645967 | 102.975  | 107.375  | 4.4     | 0.959022119 | 0.7421  | -1.046 |
| 161127_i_at | 947.8  | 815.5  | 632    | 799.9  | 1146.2 | 718.1  | 1053.7 | 885.6  | 0.238497863 | 798.8    | 950.9    | 152.1   | 0.840046272 | 0.2512  | 1.184  |
| 161128_r_at | 10     | 4.9    | 6.5    | 9.5    | 15.5   | 5.9    | 9.4    | 8      | 0.448211959 | 7.725    | 9.7      | 1.975   | 0.796391753 | 0.4608  | 1.229  |
| 161129_r_at | 1068.6 | 1032.6 | 1063.1 | 931.5  | 856.5  | 811.9  | 822.9  | 878.7  | 0.005501975 | 1023.95  | 842.5    | 181.45  | 1.21537092  | 0.00186 | -1.214 |
| 161130_f_at | 20.1   | 39.4   | 62.8   | 13.5   | 119.9  | 22.7   | 18.5   | 20.4   | 0.695446396 | 33.95    | 45.375   | 11.425  | 0.748209366 | 0.8578  | -1.111 |
| 161131_r_at | 163    | 156.1  | 246.2  | 241.8  | 265.2  | 235.2  | 214.1  | 201.6  | 0.379100012 | 201.775  | 229.025  | 27.25   | 0.881017356 | 0.3341  | 1.155  |
| 161132_at   | 7.8    | 22.1   | 14.4   | 1.6    | 5.7    | 4.5    | 3      | 23.9   | 0.750029414 | 11.475   | 9.275    | 2.2     | 1.237196765 | 0.8018  | -1.211 |
| 161133_at   | 156.8  | 204.6  | 162.1  | 159.1  | 125.8  | 146.2  | 156    | 164.6  | 0.166126154 | 170.65   | 148.15   | 22.5    | 1.151873102 | 0.1528  | -1.151 |
| 161134_at   | 75.7   | 83.6   | 83.4   | 54.8   | 83.8   | 64.7   | 84.5   | 79.2   | 0.671599401 | 74.375   | 78.05    | 3.675   | 0.952914798 | 0.6462  | -1.059 |
| 161135_f_at | 197.7  | 149.5  | 173.5  | 156    | 81.8   | 227.8  | 193    | 120    | 0.720965207 | 169.175  | 155.65   | 13.525  | 1.086893672 | 0.5454  | -1.167 |
| 161136_r_at | 23.3   | 24.6   | 23.2   | 14.1   | 30.2   | 27.7   | 29.7   | 33.1   | 0.026880807 | 21.3     | 30.175   | 8.875   | 0.705882353 | 0.0334  | 1.447  |
| 161137_r_at | 204.5  | 174.6  | 192.4  | 200.7  | 152.1  | 292    | 287.2  | 276.7  | 0.175632159 | 193.05   | 252      | 58.95   | 0.766071429 | 0.1958  | 1.265  |
| 161138_r_at | 19.5   | 36.4   | 47.4   | 33     | 13.4   | 84.3   | 90     | 60.8   | 0.207867824 | 34.075   | 62.125   | 28.05   | 0.548490946 | 0.41    | 1.535  |
| 161139_f_at | 125.5  | 213.8  | 105.9  | 143.3  | 216.5  | 185.8  | 148.2  | 254.3  | 0.147980104 | 147.125  | 201.2    | 54.075  | 0.731237575 | 0.132   | 1.389  |
| 161140_r_at | 103.5  | 118.9  | 178.2  | 132    | 43.8   | 124.7  | 114.2  | 100.7  | 0.174454843 | 133.15   | 95.85    | 37.3    | 1.389149713 | 0.2018  | -1.465 |
| 161141_r_at | 7.1    | 2.3    | 11.8   | 13.5   | 2.8    | 15.6   | 9      | 10.4   | 0.838618955 | 8.675    | 9.45     | 0.775   | 0.917989418 | 0.84    | 1.122  |
| 161142_at   | 28.8   | 18     | 12.9   | 20.4   | 35.1   | 24.5   | 33.6   | 19.7   | 0.149616867 | 20.025   | 28.225   | 8.2     | 0.709477414 | 0.1472  | 1.431  |
| 161143_r_at | 382    | 111.1  | 476    | 515.4  | 735.2  | 622.3  | 743.4  | 569.5  | 0.038938845 | 371.125  | 667.6    | 296.475 | 0.555909227 | 0.09116 | 2.077  |
| 161144_r_at | 17.5   | 53.3   | 20.2   | 14.7   | 17.4   | 14.2   | 5.1    | 19.8   | 0.272960572 | 26.425   | 14.125   | 12.3    | 1.87079646  | 0.2036  | -1.825 |
| 161145_f_at | 256    | 626.1  | 457.4  | 439    | 605.6  | 415.1  | 490.3  | 396.3  | 0.733111947 | 444.625  | 476.825  | 32.2    | 0.932469984 | 0.6357  | -1.11  |
| 161146_r_at | 51.5   | 32.6   | 31.6   | 59.5   | 13.1   | 68.4   | 55.2   | 59.7   | 0.723918559 | 43.8     | 49.1     | 5.3     | 0.892057026 | 0.9728  | -1.015 |
| 161147_f_at | 1164.3 | 870    | 1078.9 | 1011.2 | 1093.5 | 815.8  | 1044   | 997.9  | 0.635624093 | 1031.1   | 987.8    | 43.3    | 1.043834784 | 0.6451  | -1.044 |
| 161148_f_at | 380.3  | 373    | 372.1  | 374.6  | 491.4  | 498.5  | 584.6  | 466.4  | 0.013172478 | 375      | 510.225  | 135.225 | 0.734969866 | 0.0008  | 1.356  |
| 161149_r_at | 370.6  | 344.2  | 507.7  | 370    | 415.8  | 454.3  | 462.6  | 373.4  | 0.533744563 | 398.125  | 426.525  | 28.4    | 0.933415392 | 0.4681  | -1.08  |
| 161150_at   | 14     | 24.4   | 118.2  | 58.8   | 126.9  | 12.5   | 60.3   | 61.9   | 0.73992161  | 53.85    | 65.4     | 11.55   | 0.823394495 | 0.7486  | 1.256  |
| 161151_at   | 11.8   | 9.7    | 14.7   | 8.2    | 15.3   | 7.1    | 8.4    | 13.1   | 0.960182015 | 11.1     | 10.975   | 0.125   | 1.011389522 | 0.8877  | -1.033 |
| 161152_r_at | 94     | 50.5   | 101.2  | 72     | 56.1   | 122.4  | 134.7  | 101.2  | 0.294276653 | 79.425   | 103.6    | 24.175  | 0.766650579 | 0.3613  | 1.282  |
| 161153_r_at | 5.5    | 12.8   | 20.7   | 21.2   | 31     | 22.8   | 23     | 35.9   | 0.037662573 | 15.05    | 28.175   | 13.125  | 0.534161491 | 0.07037 | 2.087  |
| 161154_at   | 17.2   | 23.4   | 23.5   | 21.3   | 20.6   | 20.6   | 25.1   | 16.7   | 0.799923498 | 21.35    | 20.75    | 0.6     | 1.028915663 | 0.7917  | -1.031 |
| 161155_r_at | 280.6  | 235.9  | 272.3  | 352.4  | 278.5  | 293.5  | 298.6  | 250.4  | 0.858782014 | 285.3    | 280.25   | 5.05    | 1.018019625 | 0.9205  | -1.01  |
| 161156_r_at | 530.1  | 536.7  | 750.8  | 760.8  | 783.4  | 617.9  | 793.7  | 942.5  | 0.18095457  | 644.6    | 784.375  | 139.775 | 0.821800797 | 0.1825  | 1.222  |
| 161157_r_at | 20.9   | 11.4   | 38.7   | 8.1    | 5.6    | 3.7    | 35.7   | 6      | 0.520650678 | 19.775   | 12.75    | 7.025   | 1.550980392 | 0.2919  | -2.025 |
| 161158_f_at | 1.1    | 0.8    | 3.6    | 0.8    | 5.2    | 7.9    | 4.3    | 1.5    | 0.093529905 | 1.575    | 4.725    | 3.15    | 0.333333333 | 0.05879 | 3.242  |
| 161159_r_at | 8.7    | 24.3   | 35.7   | 28.7   | 30.3   | 6.8    | 18.3   | 20.5   | 0.500314668 | 24.35    | 18.975   | 5.375   | 1.283267457 | 0.5793  | -1.299 |



|             |        |        |        |        |        |        |        |        |             |          |          |         |             |         |        |
|-------------|--------|--------|--------|--------|--------|--------|--------|--------|-------------|----------|----------|---------|-------------|---------|--------|
| 161160_f_at | 73.7   | 109.7  | 127    | 114.4  | 129.9  | 109.3  | 99.3   | 96.8   | 0.855191199 | 106.2    | 108.825  | 2.625   | 0.975878704 | 0.7935  | -1.038 |
| 161161_r_at | 85.9   | 128.4  | 123.6  | 116.5  | 165.1  | 150.5  | 135.1  | 148.8  | 0.023356514 | 113.6    | 149.875  | 36.275  | 0.757964971 | 0.02896 | 1.331  |
| 161162_at   | 75.9   | 57.8   | 110    | 27.6   | 128.2  | 58.5   | 41.9   | 81.5   | 0.716404754 | 67.825   | 77.525   | 9.7     | 0.874879071 | 0.6806  | 1.177  |
| 161163_at   | 5.2    | 24.8   | 6.6    | 7.7    | 3.3    | 8.9    | 3.8    | 30.3   | 0.951530099 | 11.075   | 11.575   | 0.5     | 0.956803456 | 0.7942  | -1.183 |
| 161164_r_at | 15.8   | 17.2   | 10.9   | 3.2    | 17.7   | 8.3    | 9.5    | 5.9    | 0.738643585 | 11.775   | 10.35    | 1.425   | 1.137681159 | 0.9351  | -1.039 |
| 161165_f_at | 24.6   | 31.1   | 19.2   | 29     | 3.4    | 23.8   | 28.4   | 25.4   | 0.410691375 | 25.975   | 20.25    | 5.725   | 1.282716049 | 0.3757  | -1.648 |
| 161166_i_at | 13.9   | 47     | 19.1   | 29.6   | 59.7   | 20.3   | 45.4   | 56.9   | 0.169336995 | 27.4     | 45.575   | 18.175  | 0.601206802 | 0.1938  | 1.705  |
| 161167_r_at | 33.2   | 52.7   | 82.4   | 84     | 31.5   | 55.6   | 72.4   | 93.5   | 0.992548719 | 63.075   | 63.25    | 0.175   | 0.997233202 | 0.9878  | -1.005 |
| 161168_at   | 14.1   | 24.9   | 50.9   | 30.9   | 26.8   | 28.9   | 30.7   | 32.1   | 0.945765713 | 30.2     | 29.625   | 0.575   | 1.019409283 | 0.7744  | -1.084 |
| 161169_f_at | 257.2  | 278.5  | 310.2  | 252    | 297.7  | 236.8  | 236.4  | 182.9  | 0.241612465 | 274.475  | 238.45   | 36.025  | 1.151079891 | 0.2167  | -1.164 |
| 161170_r_at | 0.7    | 2      | 4.9    | 3.6    | 1.3    | 8.9    | 0.6    | 5.5    | 0.582165839 | 2.8      | 4.075    | 1.275   | 0.687116564 | 0.9177  | -1.085 |
| 161171_at   | 64.8   | 51.3   | 20.9   | 59.7   | 55.7   | 35.7   | 15.3   | 51.5   | 0.500731635 | 49.175   | 39.55    | 9.625   | 1.243362832 | 0.5592  | -1.276 |
| 161172_f_at | 144.6  | 124.7  | 150.4  | 155.6  | 172.1  | 98.8   | 134.4  | 121.3  | 0.507142327 | 143.825  | 131.65   | 12.175  | 1.092480061 | 0.4334  | -1.111 |
| 161173_f_at | 1.9    | 1.1    | 3.2    | 2.1    | 2      | 3      | 1.9    | 4.6    | 0.338605271 | 2.075    | 2.875    | 0.8     | 0.72173913  | 0.3368  | 1.364  |
| 161174_i_at | 8.4    | 10.4   | 7.9    | 8      | 8.1    | 19.1   | 6.3    | 7.9    | 0.613149754 | 8.675    | 10.35    | 1.675   | 0.838164251 | 0.7587  | -1.085 |
| 161175_r_at | 12.8   | 25.2   | 31.9   | 26.1   | 21.8   | 11.8   | 22.6   | 21.3   | 0.374631993 | 24       | 19.375   | 4.625   | 1.238709677 | 0.4728  | -1.213 |
| 161176_r_at | 2085.4 | 2259.2 | 2592.9 | 2496.2 | 2299.8 | 2315.9 | 2415.3 | 2556.9 | 0.778721113 | 2358.425 | 2396.975 | 38.55   | 0.983917229 | 0.7425  | -1.019 |
| 161177_f_at | 62     | 15     | 52.4   | 46.7   | 41.3   | 44.4   | 40.9   | 62.4   | 0.789796981 | 44.025   | 47.25    | 3.225   | 0.931746032 | 0.6118  | 1.198  |
| 161178_at   | 31.1   | 1.7    | 29.1   | 36.6   | 29.6   | 14.6   | 27.5   | 25.7   | 0.975692127 | 24.625   | 24.35    | 0.275   | 1.011293634 | 0.5954  | 1.527  |
| 161179_at   | 9.9    | 12.1   | 13.2   | 12.8   | 11.6   | 9.8    | 12.3   | 37.4   | 0.444785192 | 12       | 17.775   | 5.775   | 0.675105485 | 0.4817  | 1.265  |
| 161180_r_at | 24.1   | 55.1   | 55.8   | 50.4   | 32.6   | 39.1   | 29.4   | 31.5   | 0.176780522 | 46.35    | 33.15    | 13.2    | 1.398190045 | 0.2224  | -1.333 |
| 161181_f_at | 36.6   | 26.8   | 52.9   | 72     | 39.7   | 31.7   | 46.6   | 26.3   | 0.36612986  | 47.075   | 36.075   | 11      | 1.304920305 | 0.4085  | -1.248 |
| 161182_r_at | 0.4    | 1.1    | 0.6    | 0.8    | 6.7    | 2.5    | 0.6    | 0.4    | 0.300916227 | 0.725    | 2.55     | 1.825   | 0.284313725 | 0.3678  | 2.004  |
| 161183_at   | 396.9  | 837.3  | 522.2  | 607.8  | 1253.4 | 654    | 983.6  | 496.7  | 0.246314512 | 591.05   | 846.925  | 255.875 | 0.697877616 | 0.2447  | 1.396  |
| 161184_f_at | 89.2   | 132.6  | 125.1  | 74     | 121.4  | 128.5  | 119.2  | 157    | 0.172910746 | 105.225  | 131.525  | 26.3    | 0.800038016 | 0.1597  | 1.277  |
| 161185_i_at | 0.9    | 5.7    | 2.6    | 6.4    | 1.4    | 1.2    | 7.4    | 1.7    | 0.640125791 | 3.9      | 2.925    | 0.975   | 1.333333333 | 0.5981  | -1.406 |
| 161186_f_at | 3.3    | 2      | 5.1    | 6.7    | 5.5    | 3.8    | 6.4    | 6.2    | 0.359965728 | 4.275    | 5.475    | 1.2     | 0.780821918 | 0.309   | 1.377  |
| 161187_f_at | 27.8   | 36.3   | 48.2   | 65.5   | 61.6   | 39.9   | 42     | 48.8   | 0.719348866 | 44.45    | 48.075   | 3.625   | 0.924596984 | 0.6044  | 1.12   |
| 161188_f_at | 17.3   | 21.5   | 20.3   | 19.7   | 18.9   | 17.5   | 19.2   | 15.6   | 0.166546135 | 19.7     | 17.8     | 1.9     | 1.106741573 | 0.17    | -1.108 |
| 161189_r_at | 1.4    | 18.9   | 25.6   | 29.2   | 3      | 15.3   | 33.4   | 18.3   | 0.889334546 | 18.775   | 17.5     | 1.275   | 1.072857143 | 0.934   | -1.079 |
| 161190_r_at | 41.3   | 19     | 25.9   | 34     | 5.4    | 32.5   | 35.2   | 64     | 0.760214288 | 30.05    | 34.275   | 4.225   | 0.876732312 | 0.8145  | -1.147 |
| 161191_i_at | 4.1    | 7.2    | 22.1   | 5      | 5.2    | 2.6    | 4.5    | 2.1    | 0.250678873 | 9.6      | 3.6      | 6       | 2.666666667 | 0.1123  | -2.248 |
| 161192_at   | 51.3   | 56.3   | 39.4   | 53.1   | 61.4   | 51.5   | 57.1   | 63.5   | 0.120681809 | 50.025   | 58.375   | 8.35    | 0.856959315 | 0.1304  | 1.173  |
| 161193_r_at | 14.5   | 6.3    | 11.3   | 9.1    | 8.8    | 19     | 6.6    | 6.3    | 0.972631217 | 10.3     | 10.175   | 0.125   | 1.012285012 | 0.8172  | -1.078 |
| 161194_r_at | 69.7   | 81.7   | 119.9  | 85     | 129.6  | 70.5   | 125.8  | 96     | 0.388725972 | 89.075   | 105.475  | 16.4    | 0.844512918 | 0.4118  | 1.174  |
| 161195_i_at | 35.1   | 44     | 29.3   | 16.6   | 50.7   | 57     | 36     | 50.1   | 0.058157315 | 31.25    | 48.45    | 17.2    | 0.64499484  | 0.08038 | 1.621  |
| 161196_r_at | 186.5  | 207.1  | 295.3  | 229.6  | 278.3  | 236.5  | 191.3  | 246.3  | 0.785341342 | 229.625  | 238.1    | 8.475   | 0.964405712 | 0.7483  | -1.043 |
| 161197_r_at | 24.7   | 19.7   | 27.1   | 21.3   | 46.9   | 27.9   | 19.7   | 21.8   | 0.419225566 | 23.2     | 29.075   | 5.875   | 0.797936371 | 0.4322  | 1.19   |
| 161198_r_at | 133.2  | 179.7  | 240.2  | 112.1  | 192.3  | 125.4  | 202.4  | 165    | 0.886814033 | 166.3    | 171.275  | 4.975   | 0.970953146 | 0.7896  | -1.057 |
| 161199_at   | 191    | 171.5  | 229.1  | 181.6  | 139.5  | 195.1  | 163.9  | 261.1  | 0.912454871 | 193.3    | 189.9    | 3.4     | 1.01790416  | 0.7998  | -1.04  |
| 161200_i_at | 4.8    | 7.8    | 11     | 10.6   | 12.7   | 8.6    | 5.2    | 9.9    | 0.803948446 | 8.55     | 9.1      | 0.55    | 0.93956044  | 0.8249  | -1.064 |
| 161201_r_at | 252.5  | 283.6  | 499.2  | 458.5  | 375.1  | 393.8  | 442.7  | 420.1  | 0.62129359  | 373.45   | 407.925  | 34.475  | 0.915486915 | 0.4866  | 1.138  |
| 161202_r_at | 22.6   | 1.4    | 0.9    | 13.5   | 14.8   | 7.7    | 4.1    | 8.8    | 0.901156114 | 9.6      | 8.85     | 0.75    | 1.084745763 | 0.5159  | 1.787  |
| 161203_f_at | 35.7   | 48.2   | 43.7   | 63.7   | 48.7   | 55.2   | 60.1   | 43.4   | 0.586646898 | 47.825   | 51.85    | 4.025   | 0.922372228 | 0.5186  | 1.101  |
| 161204_r_at | 7.1    | 0.3    | 0.6    | 0.1    | 7.3    | 0.6    | 0.5    | 0.3    | 0.95233751  | 2.025    | 2.175    | 0.15    | 0.931034483 | 0.7532  | 1.448  |
| 161205_at   | 31.9   | 33.5   | 38.3   | 25.9   | 21.1   | 29.9   | 23.4   | 28.1   | 0.086037291 | 32.4     | 25.625   | 6.775   | 1.264390244 | 0.08751 | -1.263 |
| 161206_at   | 77.6   | 76     | 62.6   | 120.1  | 74.4   | 74.4   | 96.3   | 67.7   | 0.693217551 | 84.075   | 78.2     | 5.875   | 1.075127877 | 0.7561  | -1.052 |
| 161207_at   | 0.7    | 1.3    | 1.4    | 1      | 0.9    | 1.9    | 1.2    | 1.9    | 0.263818164 | 1.1      | 1.475    | 0.375   | 0.745762712 | 0.3066  | 1.308  |
| 161208_r_at | 61.7   | 13.5   | 22     | 53.6   | 12.4   | 9.2    | 37.9   | 81.5   | 0.908881132 | 37.7     | 35.25    | 2.45    | 1.069503546 | 0.6922  | -1.295 |
| 161209_r_at | 78.4   | 64.6   | 70.2   | 78.6   | 73.1   | 67.9   | 85     | 81.6   | 0.475197189 | 72.95    | 76.9     | 3.95    | 0.94863459  | 0.4844  | -1.053 |
| 161210_f_at | 11.5   | 9.8    | 5.4    | 11.5   | 14.1   | 7.6    | 10.3   | 9.4    | 0.701340097 | 9.55     | 10.35    | 0.8     | 0.922705314 | 0.6846  | -1.098 |
| 161211_r_at | 16.6   | 11.3   | 13.4   | 19.4   | 34.7   | 14.7   | 10.6   | 19.4   | 0.45157436  | 15.175   | 19.85    | 4.675   | 0.764483627 | 0.518   | 1.211  |
| 161212_r_at | 1.6    | 6      | 1.2    | 16.3   | 8.2    | 1.2    | 7.2    | 1.9    | 0.695117103 | 6.275    | 4.625    | 1.65    | 1.356756757 | 0.9299  | -1.074 |
| 161213_r_at | 2.9    | 4.3    | 21     | 40.9   | 15     | 3.4    | 26.4   | 27.5   | 0.942325522 | 17.275   | 18.075   | 0.8     | 0.955739972 | 0.7119  | 1.364  |
| 161214_r_at | 141.8  | 282.7  | 224    | 304.4  | 286.3  | 318.1  | 384.5  | 311.6  | 0.095492602 | 238.225  | 325.125  | 86.9    | 0.732718185 | 0.1076  | 1.413  |
| 161215_at   | 44.2   | 30     | 57.2   | 49.3   | 90.4   | 46.6   | 65.4   | 109.7  | 0.093626882 | 45.175   | 78.025   | 32.85   | 0.578981096 | 0.06645 | 1.686  |



|             |       |       |       |       |       |       |       |       |             |         |         |         |             |          |        |
|-------------|-------|-------|-------|-------|-------|-------|-------|-------|-------------|---------|---------|---------|-------------|----------|--------|
| 161216_at   | 4.4   | 5.6   | 3.5   | 5     | 2.4   | 6.7   | 3.7   | 10.4  | 0.562490405 | 4.625   | 5.8     | 1.175   | 0.797413793 | 0.7959   | -1.097 |
| 161217_r_at | 127.8 | 127.4 | 120.2 | 143.9 | 128.3 | 134.3 | 149.3 | 135.4 | 0.336409627 | 129.825 | 136.825 | 7       | 0.948839759 | 0.3258   | -1.054 |
| 161218_r_at | 1.4   | 2.2   | 3.4   | 7.5   | 2.3   | 1.7   | 4.4   | 1.7   | 0.501344035 | 3.625   | 2.525   | 1.1     | 1.435643564 | 0.5623   | -1.297 |
| 161219_r_at | 69    | 47.6  | 75.3  | 68    | 91.4  | 73.4  | 90.4  | 99.9  | 0.027232599 | 64.975  | 88.775  | 23.8    | 0.731906505 | 0.03761  | 1.378  |
| 161220_f_at | 96    | 76    | 70.6  | 79.7  | 38.1  | 65.9  | 74.3  | 76.7  | 0.167025668 | 80.575  | 63.75   | 16.825  | 1.263921569 | 0.1844   | -1.301 |
| 161221_f_at | 144.6 | 92.3  | 70.8  | 83.8  | 130.7 | 55.8  | 88.2  | 120.2 | 0.972228609 | 97.875  | 98.725  | 0.85    | 0.991390225 | 0.9814   | -1.006 |
| 161222_r_at | 25.2  | 10.8  | 20.7  | 6.3   | 15.8  | 8     | 20.8  | 12.4  | 0.781559912 | 15.75   | 14.25   | 1.5     | 1.105263158 | 0.9554   | -1.022 |
| 161223_r_at | 28.6  | 18.5  | 42.8  | 38.7  | 72.2  | 30.7  | 35.7  | 33    | 0.385067585 | 32.15   | 42.9    | 10.75   | 0.749417249 | 0.3557   | 1.314  |
| 161224_f_at | 7.5   | 25.1  | 16.8  | 22.5  | 8.9   | 20.3  | 12.3  | 3.7   | 0.249357612 | 17.975  | 11.3    | 6.675   | 1.590707965 | 0.2762   | -1.715 |
| 161225_r_at | 1.9   | 0.6   | 12.9  | 4.9   | 0.6   | 0.7   | 0.3   | 0.4   | 0.195879699 | 5.075   | 0.5     | 4.575   | 10.15       | 0.03496  | -6.346 |
| 161226_f_at | 35.4  | 19.8  | 51.6  | 24.6  | 46.9  | 32    | 32.8  | 12.5  | 0.862836224 | 32.85   | 31.05   | 1.8     | 1.057971014 | 0.8041   | -1.096 |
| 161227_r_at | 321.5 | 405.5 | 446.4 | 384.1 | 405.5 | 386.3 | 371.2 | 505   | 0.514692574 | 389.375 | 417     | 27.625  | 0.933752998 | 0.5094   | -1.071 |
| 161228_f_at | 112.2 | 141.7 | 141.6 | 208.8 | 214   | 144   | 97.2  | 181.5 | 0.811254496 | 151.075 | 159.175 | 8.1     | 0.949112612 | 0.8715   | -1.037 |
| 161229_at   | 1.5   | 3     | 1.6   | 1.8   | 3.5   | 1.9   | 1.8   | 3     | 0.33162414  | 1.975   | 2.55    | 0.575   | 0.774509804 | 0.3077   | 1.295  |
| 161230_r_at | 21.5  | 20.1  | 34.5  | 27.8  | 49.6  | 37.4  | 28.5  | 20    | 0.323921832 | 25.975  | 33.875  | 7.9     | 0.766789668 | 0.3492   | 1.263  |
| 161231_r_at | 84.7  | 16.7  | 22    | 66.1  | 25.7  | 75.7  | 23.9  | 46.9  | 0.84107235  | 47.375  | 43.05   | 4.325   | 1.100464576 | 0.9769   | -1.015 |
| 161232_r_at | 35    | 17.3  | 18.7  | 17.9  | 25.6  | 11.5  | 17.2  | 32.5  | 0.936209897 | 22.225  | 21.7    | 0.525   | 1.024193548 | 0.8541   | -1.056 |
| 161233_at   | 24.9  | 24.7  | 5.3   | 9.3   | 10.4  | 6.5   | 14.9  | 6.7   | 0.308426344 | 16.05   | 9.625   | 6.425   | 1.667532468 | 0.4219   | -1.451 |
| 161234_f_at | 36.5  | 23.2  | 16.5  | 41.3  | 7.1   | 10.9  | 20.2  | 15.9  | 0.063450427 | 29.375  | 13.525  | 15.85   | 2.171903882 | 0.04464  | -2.194 |
| 161235_f_at | 281.9 | 273.2 | 296.4 | 326   | 363.5 | 296.6 | 308.2 | 262.6 | 0.602775651 | 294.375 | 307.725 | 13.35   | 0.956617109 | 0.6256   | -1.041 |
| 161236_r_at | 2.4   | 11.2  | 21.4  | 12.5  | 1.9   | 13.3  | 10.5  | 11.9  | 0.617044124 | 11.875  | 9.4     | 2.475   | 1.263297872 | 0.7631   | -1.229 |
| 161237_at   | 68    | 57.8  | 79.5  | 77.6  | 52.7  | 56.4  | 68.5  | 117.6 | 0.855958839 | 70.725  | 73.8    | 3.075   | 0.958333333 | 0.9864   | -1.003 |
| 161238_f_at | 342.7 | 299.5 | 475.6 | 613.6 | 359   | 330.6 | 340.7 | 315.7 | 0.268033807 | 432.85  | 336.5   | 96.35   | 1.286329866 | 0.2417   | -1.238 |
| 161239_r_at | 7.3   | 23.1  | 10.4  | 9.1   | 16.9  | 6.2   | 39.6  | 8.1   | 0.568565897 | 12.475  | 17.7    | 5.225   | 0.70480226  | 0.7107   | 1.208  |
| 161240_f_at | 42.9  | 43.8  | 48.9  | 48.2  | 75.1  | 57.7  | 60.1  | 84.9  | 0.031948373 | 45.95   | 69.45   | 23.5    | 0.66162707  | 0.006301 | 1.495  |
| 161241_at   | 29    | 8.4   | 43.6  | 36.7  | 17.3  | 7.7   | 10.1  | 6.4   | 0.082844186 | 29.425  | 10.375  | 19.05   | 2.836144578 | 0.07001  | -2.589 |
| 161242_f_at | 7     | 27.7  | 11.2  | 14.6  | 9.2   | 7.9   | 11.8  | 37.8  | 0.860445249 | 15.125  | 16.675  | 1.55    | 0.907046477 | 0.9943   | -1.003 |
| 161243_f_at | 79.9  | 248.4 | 163.9 | 128.3 | 275.1 | 134.9 | 193.9 | 115.1 | 0.643311823 | 155.125 | 179.75  | 24.625  | 0.863004172 | 0.5967   | 1.187  |
| 161244_f_at | 58    | 78.2  | 31    | 21.9  | 41.8  | 74.8  | 43.2  | 59.9  | 0.632577937 | 47.275  | 54.925  | 7.65    | 0.860719162 | 0.4806   | 1.273  |
| 161245_r_at | 15.7  | 23.7  | 17.1  | 15.2  | 2.7   | 2.6   | 9.6   | 36.7  | 0.58500109  | 17.925  | 12.9    | 5.025   | 1.389534884 | 0.1999   | -2.496 |
| 161246_at   | 9.1   | 30.8  | 40.3  | 9.2   | 9.3   | 8.3   | 30.9  | 52.6  | 0.831466007 | 22.35   | 25.275  | 2.925   | 0.884272997 | 0.9402   | -1.048 |
| 161247_f_at | 185.9 | 231.7 | 177.6 | 249   | 191.4 | 243.2 | 238.9 | 170.2 | 0.99616828  | 211.05  | 210.925 | 0.125   | 1.000592628 | 0.9899   | -1.002 |
| 161248_r_at | 16.4  | 5.7   | 12.4  | 21.5  | 11.9  | 5.5   | 12.2  | 14.4  | 0.472186449 | 14      | 11      | 3       | 1.272727273 | 0.6071   | -1.214 |
| 161249_at   | 162.4 | 157.1 | 250.7 | 210.7 | 289.5 | 137.5 | 176.2 | 168.6 | 0.956667886 | 195.225 | 192.95  | 2.275   | 1.011790619 | 0.8709   | -1.033 |
| 161250_at   | 182.9 | 124.9 | 130.3 | 161.6 | 255.1 | 154.8 | 211.4 | 223.3 | 0.056347857 | 149.925 | 211.15  | 61.225  | 0.710040256 | 0.05061  | 1.403  |
| 161251_f_at | 8.8   | 39.9  | 35.4  | 11.4  | 15.6  | 20    | 22.2  | 19.5  | 0.613199436 | 23.875  | 19.325  | 4.55    | 1.235446313 | 0.9794   | -1.011 |
| 161252_r_at | 93.3  | 71.4  | 70    | 88.4  | 78.5  | 82.2  | 102.3 | 94.5  | 0.327927327 | 80.775  | 89.375  | 8.6     | 0.903776224 | 0.3173   | 1.11   |
| 161253_i_at | 84    | 76.2  | 101.3 | 120.1 | 110.6 | 92.3  | 109.7 | 114.5 | 0.351674225 | 95.4    | 106.775 | 11.375  | 0.893467572 | 0.3078   | 1.133  |
| 161254_r_at | 53.5  | 34.6  | 40.2  | 21.3  | 48.6  | 53.2  | 24.6  | 55.2  | 0.442082484 | 37.4    | 45.4    | 8       | 0.823788546 | 0.4887   | 1.221  |
| 161255_at   | 28.8  | 33.9  | 57.9  | 71.2  | 78.2  | 53    | 84.5  | 97.7  | 0.068778913 | 47.95   | 78.35   | 30.4    | 0.611997447 | 0.07719  | 1.708  |
| 161256_at   | 5.7   | 18.2  | 10.7  | 31.8  | 27.6  | 21.9  | 17    | 27.5  | 0.327580915 | 16.6    | 23.5    | 6.9     | 0.706382979 | 0.2262   | 1.68   |
| 161257_r_at | 89.8  | 74.3  | 125.5 | 129.9 | 91.7  | 112.8 | 75.9  | 157.6 | 0.843221241 | 104.875 | 109.5   | 4.625   | 0.957762557 | 0.8806   | -1.033 |
| 161258_at   | 175.1 | 126   | 173.4 | 202.3 | 131.2 | 182.5 | 158.4 | 195.5 | 0.917408023 | 169.2   | 166.9   | 2.3     | 1.013780707 | 0.9382   | -1.011 |
| 161259_f_at | 843.6 | 681.1 | 797.1 | 777.2 | 717.4 | 571   | 604.7 | 632.1 | 0.021455693 | 774.75  | 631.3   | 143.45  | 1.227229526 | 0.02127  | -1.228 |
| 161260_f_at | 25.5  | 29.4  | 19.9  | 21.7  | 9     | 12.2  | 5.3   | 30.1  | 0.168178269 | 24.125  | 14.15   | 9.975   | 1.704946996 | 0.09908  | -2.074 |
| 161261_f_at | 483.9 | 394.8 | 522.6 | 456.3 | 605   | 535.3 | 624.1 | 615.7 | 0.009434578 | 464.4   | 595.025 | 130.625 | 0.780471409 | 0.01082  | 1.286  |
| 161262_r_at | 19.3  | 20.7  | 32.9  | 7     | 46    | 7.2   | 13.5  | 21.3  | 0.847734073 | 19.975  | 22      | 2.025   | 0.907954545 | 0.9861   | -1.009 |
| 161263_f_at | 403.3 | 229.7 | 287.5 | 271.7 | 325.8 | 275.8 | 299.7 | 335.7 | 0.791697193 | 298.05  | 309.25  | 11.2    | 0.963783347 | 0.6741   | -1.057 |
| 161264_f_at | 456.7 | 396.4 | 492.6 | 522.3 | 344.8 | 371.4 | 412.3 | 514.4 | 0.271641146 | 467     | 410.725 | 56.275  | 1.137013817 | 0.2485   | -1.144 |
| 161265_f_at | 139.7 | 137   | 145.2 | 136.2 | 202.5 | 145   | 166.2 | 174.9 | 0.069326335 | 139.525 | 172.15  | 32.625  | 0.810485042 | 0.02768  | 1.226  |
| 161266_r_at | 9.8   | 2.5   | 27    | 21.8  | 12.9  | 20.2  | 15.7  | 31.4  | 0.517377899 | 15.275  | 20.05   | 4.775   | 0.761845387 | 0.3744   | 1.735  |
| 161267_f_at | 129.9 | 134.4 | 134.1 | 139.2 | 136.4 | 102   | 144   | 166   | 0.852861999 | 134.4   | 137.1   | 2.7     | 0.980306346 | 0.9637   | -1.005 |
| 161268_f_at | 37.7  | 37.9  | 31.9  | 48.8  | 59.2  | 30.1  | 52.7  | 40.2  | 0.42361908  | 39.075  | 45.55   | 6.475   | 0.857848518 | 0.4734   | 1.143  |
| 161269_i_at | 53.9  | 47.1  | 73.3  | 39.9  | 32.6  | 42.5  | 30.2  | 75.1  | 0.530140678 | 53.55   | 45.1    | 8.45    | 1.187361419 | 0.4103   | -1.24  |
| 161270_i_at | 103.3 | 131.2 | 85.7  | 121.8 | 135.2 | 119.1 | 59.1  | 149.9 | 0.822179706 | 110.5   | 115.825 | 5.325   | 0.954025469 | 0.9929   | -1.002 |
| 161271_r_at | 6.1   | 8.5   | 14    | 6.3   | 4.8   | 11.2  | 4.2   | 3.6   | 0.318574644 | 8.725   | 5.95    | 2.775   | 1.466386555 | 0.2268   | -1.538 |



|             |        |        |        |        |         |        |        |        |             |          |         |          |             |         |        |
|-------------|--------|--------|--------|--------|---------|--------|--------|--------|-------------|----------|---------|----------|-------------|---------|--------|
| 161272_f_at | 168    | 189.4  | 194    | 278.6  | 149.8   | 190.2  | 235.9  | 199.7  | 0.668866561 | 207.5    | 193.9   | 13.6     | 1.070139247 | 0.6818  | -1.064 |
| 161273_f_at | 46.4   | 39.2   | 72.1   | 46.5   | 40.4    | 47.8   | 55.5   | 41.8   | 0.58824921  | 51.05    | 46.375  | 4.675    | 1.100808625 | 0.6235  | -1.08  |
| 161274_at   | 12.4   | 7.2    | 40.9   | 14.1   | 12.9    | 10     | 26.2   | 8.2    | 0.637704375 | 18.65    | 14.325  | 4.325    | 1.301919721 | 0.7411  | -1.166 |
| 161275_at   | 42.8   | 36.3   | 44.1   | 32.8   | 32.7    | 71.6   | 38.9   | 66     | 0.266106465 | 39       | 52.3    | 13.3     | 0.745697897 | 0.2763  | 1.279  |
| 161276_i_at | 18.2   | 6.1    | 2.9    | 21.6   | 19.8    | 19.5   | 7.2    | 3.8    | 0.953387614 | 12.2     | 12.575  | 0.375    | 0.970178926 | 0.8757  | -1.107 |
| 161277_r_at | 7.2    | 2      | 7.1    | 6.4    | 8.1     | 4.7    | 4.9    | 1.9    | 0.677113617 | 5.675    | 4.9     | 0.775    | 1.158163265 | 0.735   | -1.167 |
| 161278_r_at | 7.3    | 6.1    | 24.3   | 19     | 26.1    | 5.3    | 16.4   | 24.7   | 0.567825102 | 14.175   | 18.125  | 3.95     | 0.782068966 | 0.6377  | 1.285  |
| 161279_f_at | 54.9   | 41.8   | 70.3   | 61     | 97.6    | 45.3   | 62.1   | 4.2    | 0.82947591  | 57       | 52.3    | 4.7      | 1.089866157 | 0.4803  | -1.705 |
| 161280_r_at | 238.9  | 92.6   | 212.1  | 195.7  | 113.9   | 178.6  | 118.7  | 168.1  | 0.323050316 | 184.825  | 144.825 | 40       | 1.276195408 | 0.4353  | -1.226 |
| 161281_f_at | 8.4    | 7.1    | 47.3   | 10.8   | 6.2     | 10.9   | 7.3    | 6.6    | 0.35169337  | 18.4     | 7.75    | 10.65    | 2.374193548 | 0.2631  | -1.745 |
| 161282_r_at | 65.5   | 102.9  | 106.7  | 141.8  | 116.1   | 97.9   | 133.8  | 96.2   | 0.72177843  | 104.225  | 111     | 6.775    | 0.938963964 | 0.6285  | -1.095 |
| 161283_i_at | 4.4    | 1.3    | 4.1    | 1      | 6.4     | 3      | 1.3    | 14.6   | 0.313223051 | 2.7      | 6.325   | 3.625    | 0.42687747  | 0.3278  | 1.998  |
| 161284_r_at | 538    | 657.1  | 962.7  | 539.3  | 927.4   | 633.4  | 1173.1 | 924.2  | 0.158471889 | 674.275  | 914.525 | 240.25   | 0.737295317 | 0.1474  | 1.365  |
| 161285_r_at | 39.8   | 41.2   | 28.9   | 11.9   | 13.9    | 17     | 43.5   | 48.5   | 0.981230096 | 30.45    | 30.725  | 0.275    | 0.991049634 | 0.9468  | -1.03  |
| 161286_f_at | 14.2   | 35.5   | 41.8   | 32.2   | 59.8    | 26.3   | 48.5   | 7.8    | 0.735746998 | 30.925   | 35.6    | 4.675    | 0.868679775 | 0.9525  | -1.033 |
| 161287_f_at | 354.4  | 372.6  | 280.1  | 607    | 534.6   | 392.5  | 426.4  | 475.7  | 0.523372242 | 403.525  | 457.3   | 53.775   | 0.88240761  | 0.3977  | 1.173  |
| 161288_r_at | 3.6    | 2.9    | 4.9    | 4.1    | 5.1     | 4.7    | 1.9    | 4.4    | 0.864957257 | 3.875    | 4.025   | 0.15     | 0.962732919 | 0.9712  | -1.01  |
| 161289_at   | 12.7   | 22.4   | 4.7    | 14.2   | 11.4    | 10.9   | 6.9    | 8.6    | 0.351627866 | 13.5     | 9.45    | 4.05     | 1.428571429 | 0.5257  | -1.266 |
| 161290_r_at | 5      | 0.4    | 0.8    | 8.7    | 0.9     | 7      | 0.7    | 6.2    | 0.992593908 | 3.725    | 3.7     | 0.025    | 1.006756757 | 0.8728  | 1.171  |
| 161291_at   | 8.2    | 2.8    | 3.4    | 3.6    | 10.9    | 1.4    | 3.2    | 21.1   | 0.382395425 | 4.5      | 9.15    | 4.65     | 0.491803279 | 0.6442  | 1.376  |
| 161292_f_at | 390.4  | 520.2  | 321.4  | 466.3  | 451.5   | 395.4  | 602.8  | 479.1  | 0.386597759 | 424.575  | 482.2   | 57.625   | 0.880495645 | 0.3749  | 1.141  |
| 161293_r_at | 3.1    | 1.3    | 7.5    | 20.4   | 12.9    | 15.5   | 10     | 28.8   | 0.195310588 | 8.075    | 16.8    | 8.725    | 0.480654762 | 0.1236  | 3.078  |
| 161294_f_at | 4029.4 | 3587.6 | 3941.5 | 3769.7 | 4547    | 2769.6 | 3287.8 | 2968   | 0.356156738 | 3832.05  | 3393.1  | 438.95   | 1.129365477 | 0.2615  | -1.15  |
| 161295_r_at | 6.9    | 0.2    | 10.1   | 0.7    | 4       | 0.4    | 0.9    | 15.5   | 0.871547954 | 4.475    | 5.2     | 0.725    | 0.860576923 | 0.97    | -1.051 |
| 161296_r_at | 2.7    | 3.9    | 1.6    | 14.8   | 1.7     | 1.6    | 4      | 0.5    | 0.304725708 | 5.75     | 1.95    | 3.8      | 2.948717949 | 0.1799  | -2.611 |
| 161297_f_at | 117.3  | 120.5  | 132    | 132.5  | 86      | 86.4   | 91.6   | 126.3  | 0.055459367 | 125.575  | 97.575  | 28       | 1.28695875  | 0.03419 | -1.302 |
| 161298_i_at | 26.6   | 28.7   | 16.5   | 17.4   | 12.1    | 23.3   | 36     | 30.1   | 0.630642191 | 22.3     | 25.375  | 3.075    | 0.878817734 | 0.7746  | -1.087 |
| 161299_r_at | 9.5    | 14.9   | 7.9    | 13.4   | 15.5    | 10.5   | 3.8    | 10.5   | 0.660644135 | 11.425   | 10.075  | 1.35     | 1.133995037 | 0.5574  | -1.23  |
| 161300_r_at | 3.1    | 1.4    | 14.2   | 15.3   | 3.9     | 2.6    | 11.3   | 17.7   | 0.943236653 | 8.5      | 8.875   | 0.375    | 0.957746479 | 0.8063  | 1.208  |
| 161301_f_at | 71.1   | 49     | 76.2   | 106.4  | 65      | 123.4  | 48.9   | 79     | 0.870397457 | 75.675   | 79.075  | 3.4      | 0.957002845 | 0.9301  | -1.023 |
| 161302_r_at | 47.9   | 44.2   | 65.6   | 39     | 53      | 29.2   | 61.1   | 63.7   | 0.801235513 | 49.175   | 51.75   | 2.575    | 0.950241546 | 0.902   | -1.028 |
| 161303_at   | 79     | 69.2   | 121.4  | 87.5   | 84      | 126.7  | 56.7   | 77.7   | 0.877189836 | 89.275   | 86.275  | 3        | 1.03477253  | 0.8016  | -1.055 |
| 161304_r_at | 641.9  | 679.5  | 585.6  | 664.1  | 873.3   | 571.7  | 717.7  | 1083.1 | 0.221413764 | 642.775  | 811.45  | 168.675  | 0.79213137  | 0.1908  | 1.23   |
| 161305_r_at | 1.4    | 13.2   | 7.3    | 13.9   | 22.5    | 1.5    | 1.8    | 2.7    | 0.770302563 | 8.95     | 7.125   | 1.825    | 1.256140351 | 0.498   | -1.812 |
| 161306_r_at | 0.3    | 1.4    | 1.4    | 4.6    | 0.9     | 0.2    | 4.6    | 3.6    | 0.785624999 | 1.925    | 2.325   | 0.4      | 0.827956989 | 0.9432  | -1.071 |
| 161307_f_at | 48.2   | 58.6   | 48.1   | 68.5   | 74.2    | 41.7   | 65.2   | 58     | 0.65978062  | 55.85    | 59.775  | 3.925    | 0.934337097 | 0.7198  | -1.058 |
| 161308_f_at | 43.8   | 83.6   | 57.7   | 65.5   | 68      | 33.3   | 79.2   | 94.6   | 0.707770914 | 62.65    | 68.775  | 6.125    | 0.910941476 | 0.8548  | -1.052 |
| 161309_r_at | 1.7    | 4.6    | 1      | 15.5   | 1.6     | 11.9   | 1.5    | 15.6   | 0.705892829 | 5.7      | 7.65    | 1.95     | 0.745098039 | 0.7067  | 1.412  |
| 161310_at   | 46.2   | 19.3   | 40.5   | 17.2   | 71.1    | 53.9   | 20.1   | 47.6   | 0.232140279 | 30.8     | 48.175  | 17.375   | 0.639335755 | 0.2791  | 1.556  |
| 161311_at   | 7.4    | 16     | 18.6   | 17.2   | 15.1    | 17.2   | 10.3   | 15.5   | 0.928865466 | 14.8     | 14.525  | 0.275    | 1.018932874 | 0.9337  | -1.021 |
| 161312_r_at | 3.6    | 4      | 3.3    | 14.2   | 15.5    | 1.9    | 6      | 4.5    | 0.866041456 | 6.275    | 6.975   | 0.7      | 0.899641577 | 0.9501  | -1.037 |
| 161313_at   | 4.4    | 2.3    | 1.1    | 9.5    | 2.9     | 1.3    | 3.2    | 1.5    | 0.344605271 | 4.325    | 2.225   | 2.1      | 1.943820225 | 0.4085  | -1.568 |
| 161314_r_at | 34.1   | 28.2   | 29.7   | 42.8   | 65.7    | 47     | 11.7   | 37     | 0.604743609 | 33.7     | 40.35   | 6.65     | 0.835192069 | 0.9555  | -1.023 |
| 161315_i_at | 25.4   | 15     | 26.2   | 12.3   | 16.3    | 23.4   | 13.7   | 24.4   | 0.952601644 | 19.725   | 19.45   | 0.275    | 1.014138817 | 0.9673  | -1.01  |
| 161316_f_at | 469.5  | 575.4  | 541.2  | 428.7  | 578.1   | 587.5  | 481.5  | 495.6  | 0.48789491  | 503.7    | 535.675 | 31.975   | 0.940308956 | 0.4745  | -1.066 |
| 161317_r_at | 45.1   | 46.4   | 37.8   | 56.8   | 64.3    | 43.5   | 32.1   | 50     | 0.907675237 | 46.525   | 47.475  | 0.95     | 0.979989468 | 0.9954  | -1.001 |
| 161318_f_at | 82.4   | 91.7   | 133.1  | 118.7  | 105.9   | 61.4   | 88     | 59.2   | 0.137157832 | 106.475  | 78.625  | 27.85    | 1.354213037 | 0.1303  | -1.37  |
| 161319_at   | 36.2   | 29.8   | 41.2   | 45.1   | 31.4    | 42.2   | 48.5   | 69.4   | 0.320737087 | 38.075   | 47.875  | 9.8      | 0.795300261 | 0.3276  | 1.221  |
| 161320_r_at | 20.9   | 20     | 53.4   | 38.1   | 35.3    | 41.9   | 27.2   | 39.5   | 0.754430114 | 33.1     | 35.975  | 2.875    | 0.920083391 | 0.5659  | 1.169  |
| 161321_i_at | 50.6   | 22.2   | 6.3    | 14.8   | 35.6    | 30.7   | 6.7    | 18     | 0.952484842 | 23.475   | 22.75   | 0.725    | 1.031868132 | 0.9246  | -1.058 |
| 161322_r_at | 6.9    | 4.7    | 5.3    | 3.2    | 3.2     | 3.4    | 5      | 5.3    | 0.429105331 | 5.025    | 4.225   | 0.8      | 1.189349112 | 0.4495  | -1.182 |
| 161323_f_at | 3      | 2.4    | 3.4    | 3.9    | 1.9     | 2.7    | 6.1    | 15.6   | 0.359226813 | 3.175    | 6.575   | 3.4      | 0.482889734 | 0.4247  | 1.502  |
| 161324_r_at | 54     | 60.4   | 72.3   | 51.5   | 79      | 49.8   | 64.7   | 75.6   | 0.378247751 | 59.55    | 67.275  | 7.725    | 0.885172798 | 0.4082  | 1.121  |
| 161325_at   | 263.6  | 260.8  | 311    | 364.4  | 358.2   | 273.7  | 330.6  | 338.9  | 0.437887375 | 299.95   | 325.35  | 25.4     | 0.921930229 | 0.4159  | -1.09  |
| 161326_f_at | 55     | 25.2   | 47.9   | 40.2   | 27.3    | 41.5   | 41.2   | 65     | 0.873882435 | 42.075   | 43.75   | 1.675    | 0.961714286 | 0.9007  | -1.032 |
| 161327_f_at | 6084.1 | 6921   | 5599.4 | 7260.6 | 10671.2 | 6009.3 | 7223.3 | 7061.4 | 0.306665083 | 6466.275 | 7741.3  | 1275.025 | 0.835295751 | 0.2776  | 1.176  |



|             |        |       |        |        |        |        |        |        |             |         |          |         |             |         |        |
|-------------|--------|-------|--------|--------|--------|--------|--------|--------|-------------|---------|----------|---------|-------------|---------|--------|
| 161328_i_at | 97.1   | 97.9  | 125.9  | 188.5  | 105.9  | 149.9  | 63.3   | 48.7   | 0.301603229 | 127.35  | 91.95    | 35.4    | 1.384991843 | 0.2452  | -1.465 |
| 161329_f_at | 807.8  | 900.1 | 1025.2 | 1237   | 1207.5 | 798.2  | 1104.7 | 1273.2 | 0.489336914 | 992.525 | 1095.9   | 103.375 | 0.905671138 | 0.5147  | 1.101  |
| 161330_r_at | 23.3   | 15.4  | 33.3   | 15.9   | 32.7   | 15.2   | 28.8   | 20     | 0.71705171  | 21.975  | 24.175   | 2.2     | 0.908996898 | 0.7006  | 1.107  |
| 161331_r_at | 11.8   | 10    | 3.9    | 28.5   | 38.1   | 23     | 7.7    | 24.3   | 0.278622322 | 13.55   | 23.275   | 9.725   | 0.58216971  | 0.2786  | 1.883  |
| 161332_f_at | 392.4  | 348.2 | 395.4  | 333.5  | 370.1  | 354.8  | 337.1  | 288.7  | 0.255221801 | 367.375 | 337.675  | 29.7    | 1.087954394 | 0.2596  | -1.09  |
| 161333_f_at | 72.1   | 63.8  | 43.2   | 115.5  | 135.5  | 77.8   | 105.2  | 89.6   | 0.201353282 | 73.65   | 102.025  | 28.375  | 0.721881892 | 0.1702  | 1.442  |
| 161334_r_at | 58.7   | 70.1  | 92.5   | 98.8   | 69.1   | 75.2   | 117.6  | 94.5   | 0.552882317 | 80.025  | 89.1     | 9.075   | 0.898148148 | 0.5538  | -1.113 |
| 161335_r_at | 4.7    | 9.5   | 26.2   | 18.9   | 5.6    | 20.3   | 11.9   | 7.5    | 0.571837967 | 14.825  | 11.325   | 3.5     | 1.309050773 | 0.7016  | -1.211 |
| 161336_r_at | 2.8    | 3.3   | 5.5    | 3.8    | 4.7    | 3.5    | 3.3    | 3.7    | 0.943159989 | 3.85    | 3.8      | 0.05    | 1.013157895 | 0.9524  | -1.01  |
| 161337_f_at | 103    | 93.1  | 103.5  | 181.8  | 190.9  | 112.2  | 127.2  | 207    | 0.257772951 | 120.35  | 159.325  | 38.975  | 0.755374235 | 0.2303  | 1.33   |
| 161338_i_at | 332.3  | 224.3 | 214.9  | 279.4  | 283    | 220.9  | 201.5  | 144.9  | 0.250098948 | 262.725 | 212.575  | 50.15   | 1.235916735 | 0.2391  | -1.251 |
| 161339_f_at | 70.2   | 42.2  | 15.5   | 32.2   | 38     | 28.9   | 65.7   | 76.8   | 0.472944086 | 40.025  | 52.35    | 12.325  | 0.764565425 | 0.428   | 1.392  |
| 161340_r_at | 2      | 5.5   | 3.6    | 2.3    | 7.6    | 11.5   | 5.7    | 3.4    | 0.117879894 | 3.35    | 7.05     | 3.7     | 0.475177305 | 0.07945 | 2.075  |
| 161341_f_at | 90.7   | 120.7 | 88.5   | 72.8   | 26.2   | 113    | 73.8   | 133.5  | 0.811083116 | 93.175  | 86.625   | 6.55    | 1.075613276 | 0.5825  | -1.247 |
| 161342_r_at | 945    | 896.3 | 835.6  | 1207.7 | 511.9  | 905.1  | 760.3  | 876.4  | 0.138174618 | 971.15  | 763.425  | 207.725 | 1.272096146 | 0.1481  | -1.29  |
| 161343_r_at | 4.1    | 2.6   | 2.3    | 28.8   | 5.4    | 3      | 4.1    | 3.2    | 0.456042361 | 9.45    | 3.925    | 5.525   | 2.407643312 | 0.6274  | -1.358 |
| 161344_r_at | 10.1   | 20.7  | 87.6   | 29.1   | 31.1   | 48.3   | 49.3   | 63.3   | 0.582387847 | 36.875  | 48       | 11.125  | 0.768229167 | 0.2939  | 1.724  |
| 161345_f_at | 157.6  | 154.2 | 133.3  | 144.6  | 233.2  | 164.6  | 176.7  | 255.6  | 0.067412353 | 147.425 | 207.525  | 60.1    | 0.710396338 | 0.0272  | 1.387  |
| 161346_f_at | 15.5   | 9.9   | 13.9   | 12.7   | 17.6   | 15.2   | 12.7   | 18.8   | 0.138421371 | 13      | 16.075   | 3.075   | 0.808709176 | 0.1446  | 1.241  |
| 161347_r_at | 215.6  | 197.2 | 275.3  | 239.4  | 217.8  | 292.5  | 212.8  | 304.4  | 0.432174329 | 231.875 | 256.875  | 25      | 0.902676399 | 0.4468  | -1.102 |
| 161348_r_at | 135.1  | 110.3 | 153.2  | 148.1  | 143.2  | 122.1  | 132.8  | 150.8  | 0.963455514 | 136.675 | 137.225  | 0.55    | 0.995991984 | 0.9238  | -1.009 |
| 161349_f_at | 295.8  | 269.9 | 253.4  | 267.3  | 340.4  | 274.5  | 344.3  | 270.5  | 0.177607835 | 271.6   | 307.425  | 35.825  | 0.883467512 | 0.1564  | 1.126  |
| 161350_f_at | 31.6   | 41.3  | 52.6   | 56.9   | 43.3   | 29.6   | 10     | 49.1   | 0.277862026 | 45.6    | 33       | 12.6    | 1.381818182 | 0.2817  | -1.575 |
| 161351_r_at | 2.6    | 0.6   | 2.3    | 1      | 21     | 1.2    | 1.9    | 1.6    | 0.396948588 | 1.625   | 6.425    | 4.8     | 0.252918288 | 0.3189  | 2.255  |
| 161352_r_at | 20.5   | 45.6  | 42.8   | 43.4   | 41     | 47.3   | 14.4   | 46.2   | 0.933347185 | 38.075  | 37.225   | 0.85    | 1.022834117 | 0.8349  | -1.078 |
| 161353_r_at | 1.3    | 12.1  | 1.2    | 2      | 4.6    | 2.5    | 15.7   | 8.3    | 0.392526304 | 4.15    | 7.775    | 3.625   | 0.533762058 | 0.2176  | 2.507  |
| 161354_f_at | 205.5  | 193.3 | 218.5  | 262.7  | 265.8  | 247.4  | 213.1  | 245.1  | 0.271305195 | 220     | 242.85   | 22.85   | 0.905908997 | 0.2513  | -1.108 |
| 161355_f_at | 89.8   | 98.3  | 141.4  | 206.1  | 112.7  | 174    | 95.8   | 125    | 0.831991873 | 133.9   | 126.875  | 7.025   | 1.055369458 | 0.9238  | -1.023 |
| 161356_at   | 35.4   | 40    | 42.6   | 31.3   | 36.8   | 42     | 25.9   | 46.7   | 0.922532419 | 37.325  | 37.85    | 0.525   | 0.986129458 | 0.9874  | -1.002 |
| 161357_r_at | 267.5  | 255.6 | 325    | 125.3  | 287.8  | 233.6  | 178.6  | 413.6  | 0.613005755 | 243.35  | 278.4    | 35.05   | 0.874102011 | 0.6161  | 1.156  |
| 161358_r_at | 165.7  | 169.8 | 186.7  | 162.4  | 135.2  | 188.5  | 180.1  | 232.2  | 0.571627534 | 171.15  | 184      | 12.85   | 0.930163043 | 0.6474  | -1.057 |
| 161359_s_at | 3164.8 | 3328  | 2983.7 | 2536.3 | 4824.3 | 2773.9 | 3499.8 | 3242.9 | 0.286469196 | 3003.2  | 3585.225 | 582.025 | 0.837660119 | 0.2632  | 1.175  |
| 161360_at   | 79.4   | 111.1 | 10     | 50.3   | 35.3   | 53.3   | 117.8  | 67.8   | 0.840903064 | 62.7    | 68.55    | 5.85    | 0.914660832 | 0.6223  | 1.359  |
| 161361_s_at | 384.5  | 348.2 | 270.6  | 259.2  | 489.3  | 407.4  | 426.2  | 608.1  | 0.02627168  | 315.625 | 482.75   | 167.125 | 0.653806318 | 0.01765 | 1.531  |
| 161362_at   | 10.9   | 7.3   | 7.8    | 8.3    | 6.9    | 8.6    | 5.7    | 8.8    | 0.361585463 | 8.575   | 7.5      | 1.075   | 1.143333333 | 0.3471  | -1.147 |
| 161363_r_at | 375.8  | 341.1 | 491.9  | 393.5  | 340.6  | 398.9  | 363.9  | 440.4  | 0.722071038 | 400.575 | 385.95   | 14.625  | 1.03789351  | 0.7437  | -1.033 |
| 161364_f_at | 212    | 286.9 | 197.8  | 201.1  | 310.7  | 228.8  | 208.4  | 281.3  | 0.338311156 | 224.45  | 257.3    | 32.85   | 0.872328022 | 0.3234  | 1.146  |
| 161365_r_at | 45.7   | 32.3  | 20.4   | 43     | 65.1   | 34.4   | 31.5   | 26.6   | 0.713670869 | 35.35   | 39.4     | 4.05    | 0.897208122 | 0.7414  | -1.097 |
| 161366_r_at | 7.7    | 5.2   | 12.7   | 41.5   | 3.6    | 19.9   | 7.4    | 9.6    | 0.504628734 | 16.775  | 10.125   | 6.65    | 1.656790123 | 0.56    | -1.424 |
| 161367_f_at | 232.8  | 341.6 | 326.9  | 367.1  | 326.2  | 253.7  | 251.5  | 187.9  | 0.177027819 | 317.1   | 254.825  | 62.275  | 1.2443834   | 0.1911  | -1.25  |
| 161368_r_at | 0.3    | 5.2   | 0.3    | 0.1    | 1.4    | 0.6    | 8.1    | 0.8    | 0.590879052 | 1.475   | 2.725    | 1.25    | 0.541284404 | 0.2865  | 3.427  |
| 161369_r_at | 22.6   | 2.5   | 20.5   | 17.8   | 35.7   | 6.1    | 14.7   | 19.2   | 0.704970574 | 15.85   | 18.925   | 3.075   | 0.837516513 | 0.6848  | 1.314  |
| 161370_f_at | 123    | 144.8 | 148.4  | 61.7   | 135.9  | 137.6  | 136.7  | 118.1  | 0.580008405 | 119.475 | 132.075  | 12.6    | 0.904599659 | 0.4897  | 1.166  |
| 161371_r_at | 0.3    | 0.8   | 1.5    | 14.7   | 2.1    | 4.8    | 3.4    | 14     | 0.704988196 | 4.325   | 6.075    | 1.75    | 0.711934156 | 0.2577  | 3.262  |
| 161372_f_at | 4.7    | 24    | 6.4    | 11.3   | 3.7    | 11.7   | 8.7    | 3.6    | 0.38240428  | 11.6    | 6.925    | 4.675   | 1.675090253 | 0.3704  | -1.568 |
| 161373_r_at | 43.3   | 52.9  | 24.9   | 12.6   | 106.5  | 29.2   | 49.4   | 10.9   | 0.527832218 | 33.425  | 49       | 15.575  | 0.682142857 | 0.7252  | 1.237  |
| 161374_f_at | 64.5   | 54.1  | 30.7   | 57.5   | 73.9   | 33     | 62.6   | 50.2   | 0.787496133 | 51.7    | 54.925   | 3.225   | 0.941283569 | 0.8284  | -1.056 |
| 161375_at   | 25.6   | 5     | 24.5   | 3.4    | 4.7    | 7.8    | 2.5    | 17.6   | 0.393382514 | 14.625  | 8.15     | 6.475   | 1.794478528 | 0.5081  | -1.603 |
| 161376_f_at | 20.8   | 7.5   | 28.9   | 40.6   | 18.6   | 18.8   | 33.1   | 37.4   | 0.77726711  | 24.45   | 26.975   | 2.525   | 0.90639481  | 0.6184  | 1.239  |
| 161377_at   | 12.6   | 6.4   | 10.9   | 14.3   | 24.3   | 14.3   | 19.9   | 20.9   | 0.017765562 | 11.05   | 19.85    | 8.8     | 0.556675063 | 0.02693 | 1.836  |
| 161378_r_at | 183.4  | 255.6 | 279    | 162.9  | 274.6  | 422.5  | 189    | 194.9  | 0.45440756  | 220.225 | 270.25   | 50.025  | 0.814893617 | 0.4736  | 1.19   |
| 161379_at   | 65.2   | 47.7  | 42.4   | 39     | 9.3    | 99.7   | 66.5   | 83.5   | 0.480403108 | 48.575  | 64.75    | 16.175  | 0.75019305  | 0.9973  | -1.002 |
| 161380_f_at | 403.2  | 297   | 421.2  | 393.2  | 296.6  | 231.7  | 327.3  | 283.7  | 0.037292244 | 378.65  | 284.825  | 93.825  | 1.329412797 | 0.03866 | -1.328 |
| 161381_r_at | 22.5   | 20.9  | 10.8   | 24.7   | 34.2   | 1.2    | 19.6   | 16.1   | 0.80562674  | 19.725  | 17.775   | 1.95    | 1.109704641 | 0.489   | -1.753 |
| 161382_at   | 51.8   | 27.7  | 42.8   | 23.9   | 62.5   | 51     | 49.7   | 44.5   | 0.099140782 | 36.55   | 51.925   | 15.375  | 0.703899856 | 0.08967 | 1.481  |
| 161383_r_at | 24.7   | 63.4  | 41.5   | 8.9    | 111.3  | 8.2    | 12.3   | 72.6   | 0.579381273 | 34.625  | 51.1     | 16.475  | 0.677592955 | 0.9155  | -1.089 |



|             |       |       |       |       |       |       |       |       |             |         |         |        |             |         |        |
|-------------|-------|-------|-------|-------|-------|-------|-------|-------|-------------|---------|---------|--------|-------------|---------|--------|
| 161384_r_at | 597.1 | 531.9 | 487.2 | 547.3 | 578.6 | 523.3 | 599.6 | 767.2 | 0.25192911  | 540.875 | 617.175 | 76.3   | 0.87637218  | 0.2225  | 1.132  |
| 161385_r_at | 5.7   | 14.2  | 23.2  | 11.9  | 3.9   | 14.9  | 19.2  | 20.6  | 0.869279858 | 13.75   | 14.65   | 0.9    | 0.938566553 | 0.9918  | -1.005 |
| 161386_f_at | 169.9 | 160.6 | 195.2 | 168.1 | 185   | 158.4 | 193.4 | 223   | 0.332194488 | 173.45  | 189.95  | 16.5   | 0.913135036 | 0.3329  | -1.09  |
| 161387_i_at | 25.1  | 27.9  | 31.4  | 38.7  | 38.6  | 41.6  | 29.6  | 33.4  | 0.253177007 | 30.775  | 35.8    | 5.025  | 0.859636872 | 0.2424  | 1.168  |
| 161388_f_at | 49.8  | 27.1  | 46.2  | 41    | 46.3  | 42    | 25.5  | 53    | 0.932955304 | 41.025  | 41.7    | 0.675  | 0.98381295  | 0.9792  | -1.006 |
| 161389_f_at | 180.3 | 108.1 | 178.9 | 176.9 | 132.4 | 200.3 | 203.5 | 185.7 | 0.452238916 | 161.05  | 180.475 | 19.425 | 0.892367364 | 0.4792  | 1.129  |
| 161390_r_at | 36.9  | 39.1  | 43.7  | 48.2  | 20.4  | 44.1  | 42.7  | 51.7  | 0.770715205 | 41.975  | 39.725  | 2.25   | 1.056639396 | 0.6396  | -1.112 |
| 161391_r_at | 11    | 17.1  | 30.2  | 27    | 5.1   | 13.4  | 4     | 19.5  | 0.110309224 | 21.325  | 10.5    | 10.825 | 2.030952381 | 0.1075  | -2.323 |
| 161392_f_at | 225.2 | 209.9 | 283.5 | 361   | 278.6 | 272.3 | 204   | 336.2 | 0.949742193 | 269.9   | 272.775 | 2.875  | 0.989460178 | 0.9136  | -1.018 |
| 161393_at   | 3     | 4.3   | 2.4   | 4.5   | 3.1   | 2.3   | 4.6   | 3.4   | 0.783668012 | 3.55    | 3.35    | 0.2    | 1.059701493 | 0.7966  | -1.056 |
| 161394_f_at | 21.5  | 13    | 19.2  | 7.1   | 9.1   | 8.5   | 7.4   | 3.9   | 0.08576995  | 15.2    | 7.225   | 7.975  | 2.103806228 | 0.0663  | -2.029 |
| 161395_i_at | 17.9  | 25.4  | 9.8   | 10.5  | 8.9   | 2.2   | 3.6   | 40.4  | 0.837523792 | 15.9    | 13.775  | 2.125  | 1.154264973 | 0.3433  | -2.006 |
| 161396_f_at | 249.2 | 465.6 | 296.3 | 294.2 | 408.3 | 346.9 | 401.3 | 405.9 | 0.274851365 | 326.325 | 390.6   | 64.275 | 0.835445469 | 0.1902  | 1.229  |
| 161397_r_at | 641.5 | 628.1 | 751.3 | 664.8 | 885.2 | 676.9 | 821.8 | 698.5 | 0.145933107 | 671.425 | 770.6   | 99.175 | 0.871301583 | 0.1273  | 1.143  |
| 161398_at   | 13    | 54.2  | 36.7  | 23.8  | 23    | 21    | 25.5  | 44.8  | 0.760952268 | 31.925  | 28.575  | 3.35   | 1.117235346 | 0.9384  | -1.029 |
| 161399_r_at | 41    | 54.8  | 81.3  | 73.1  | 62.8  | 46.7  | 93.5  | 21.8  | 0.732463898 | 62.55   | 56.2    | 6.35   | 1.112989324 | 0.5806  | -1.222 |
| 161400_f_at | 893   | 766   | 809.9 | 685.1 | 844.4 | 956.4 | 874.4 | 853.2 | 0.123776937 | 788.5   | 882.1   | 93.6   | 0.893889582 | 0.1125  | 1.122  |
| 161401_f_at | 175.8 | 168.8 | 174.5 | 204.4 | 173.9 | 137.5 | 151.9 | 139.8 | 0.040288425 | 180.875 | 150.775 | 30.1   | 1.199635218 | 0.03636 | -1.202 |
| 161402_r_at | 13.1  | 27.2  | 42.4  | 36.9  | 29    | 7.5   | 1.7   | 30.3  | 0.238678917 | 29.9    | 17.125  | 12.775 | 1.745985401 | 0.23    | -2.64  |
| 161403_r_at | 18.2  | 32    | 45.8  | 38.5  | 19.7  | 31.1  | 22.7  | 77    | 0.796984943 | 33.625  | 37.625  | 4      | 0.893687708 | 0.9769  | -1.011 |
| 161404_at   | 25.9  | 33.9  | 181.9 | 153.9 | 200.9 | 49.2  | 127.6 | 76    | 0.790926185 | 98.9    | 113.425 | 14.525 | 0.871941812 | 0.5849  | 1.405  |
| 161405_r_at | 33.7  | 28.4  | 43.2  | 45.4  | 16.4  | 46.9  | 34.2  | 30.7  | 0.4829916   | 37.675  | 32.05   | 5.625  | 1.17550702  | 0.4236  | -1.235 |
| 161406_at   | 69    | 69.5  | 90.4  | 78.1  | 33.7  | 67.1  | 76.3  | 80.8  | 0.352293664 | 76.75   | 64.475  | 12.275 | 1.19038387  | 0.3357  | -1.248 |
| 161407_i_at | 589.4 | 533.7 | 762.5 | 754.8 | 802.6 | 642.6 | 708.2 | 776.4 | 0.337729414 | 660.1   | 732.45  | 72.35  | 0.901221926 | 0.316   | 1.119  |
| 161408_r_at | 33.7  | 36.2  | 30.1  | 43.8  | 50.2  | 35.5  | 39.6  | 45.5  | 0.171839227 | 35.95   | 42.7    | 6.75   | 0.841920375 | 0.1651  | 1.189  |
| 161409_f_at | 146   | 108.3 | 87.4  | 149.8 | 169.6 | 96.1  | 164.5 | 211.8 | 0.240443351 | 122.875 | 160.5   | 37.625 | 0.765576324 | 0.2782  | 1.287  |
| 161410_r_at | 21.1  | 3.1   | 31.8  | 24.4  | 48.1  | 13.4  | 18.8  | 25    | 0.548587153 | 20.1    | 26.325  | 6.225  | 0.763532764 | 0.4852  | 1.556  |
| 161411_i_at | 12.4  | 24    | 19.4  | 18.1  | 6.7   | 23.3  | 4.3   | 20.9  | 0.431401444 | 18.475  | 13.8    | 4.675  | 1.338768116 | 0.2973  | -1.656 |
| 161412_r_at | 11.6  | 7.1   | 27.6  | 1.5   | 2.8   | 2.6   | 11.2  | 24.4  | 0.830459517 | 11.95   | 10.25   | 1.7    | 1.165853659 | 0.8791  | -1.139 |
| 161413_f_at | 47.4  | 17.5  | 26.8  | 91.8  | 66.8  | 49.4  | 29.7  | 55.4  | 0.818807782 | 45.875  | 50.325  | 4.45   | 0.911574764 | 0.5631  | 1.277  |
| 161414_f_at | 252   | 254.4 | 278.5 | 282.2 | 345.2 | 240.8 | 314.7 | 323.6 | 0.182484362 | 266.775 | 306.075 | 39.3   | 0.871600098 | 0.1762  | 1.139  |
| 161415_r_at | 12.8  | 13.4  | 3.8   | 8.4   | 1.5   | 9.3   | 7.1   | 19.4  | 0.95213123  | 9.6     | 9.325   | 0.275  | 1.029490617 | 0.6858  | -1.298 |
| 161416_r_at | 1.7   | 7.4   | 2.1   | 0.7   | 1.1   | 3.5   | 1.3   | 11.8  | 0.64238327  | 2.975   | 4.425   | 1.45   | 0.672316384 | 0.7199  | 1.315  |
| 161417_r_at | 16.1  | 2.1   | 1.3   | 2.8   | 3     | 17.8  | 9.9   | 6.2   | 0.471639254 | 5.575   | 9.225   | 3.65   | 0.604336043 | 0.2608  | 2.301  |
| 161418_r_at | 30    | 29.1  | 26.1  | 55.8  | 28    | 30.7  | 30    | 35.4  | 0.588871493 | 35.25   | 31.025  | 4.225  | 1.1361805   | 0.6599  | -1.086 |
| 161419_r_at | 36.3  | 38.1  | 105.4 | 45.5  | 167.4 | 87.9  | 122.4 | 102.8 | 0.036967091 | 56.325  | 120.125 | 63.8   | 0.468886576 | 0.02632 | 2.298  |
| 161420_r_at | 1     | 0.7   | 1.3   | 1.8   | 0.8   | 2     | 7.6   | 2     | 0.302686692 | 1.2     | 3.1     | 1.9    | 0.387096774 | 0.2241  | 1.994  |
| 161421_r_at | 48.2  | 35.5  | 21.1  | 50.1  | 9.1   | 28.2  | 24.2  | 38.8  | 0.184757443 | 38.725  | 25.075  | 13.65  | 1.544366899 | 0.2247  | -1.651 |
| 161422_f_at | 34.7  | 36.6  | 33.6  | 66.5  | 50.2  | 47.2  | 64.1  | 47.9  | 0.338019163 | 42.85   | 52.35   | 9.5    | 0.818529131 | 0.2327  | 1.265  |
| 161423_r_at | 30.8  | 29.5  | 45.8  | 36.1  | 59.4  | 41.7  | 6.3   | 45.7  | 0.831207147 | 35.55   | 38.275  | 2.725  | 0.928804703 | 0.7329  | -1.207 |
| 161424_f_at | 157.5 | 265   | 271.6 | 234.8 | 270.3 | 306.1 | 252.9 | 149.9 | 0.777958708 | 232.225 | 244.8   | 12.575 | 0.948631536 | 0.8462  | -1.042 |
| 161425_r_at | 106.8 | 114.6 | 133.8 | 140.3 | 161.9 | 143.9 | 46.4  | 196.6 | 0.711810587 | 123.875 | 137.2   | 13.325 | 0.902879009 | 0.9546  | -1.02  |
| 161426_at   | 165.2 | 148.2 | 140.5 | 162.4 | 191.3 | 59.2  | 215.2 | 147   | 0.980940559 | 154.075 | 153.175 | 0.9    | 1.005875632 | 0.7191  | -1.117 |
| 161427_f_at | 192.2 | 203   | 248   | 236.4 | 204.9 | 175.3 | 222.8 | 283.4 | 0.951223734 | 219.9   | 221.6   | 1.7    | 0.99232852  | 0.9855  | -1.002 |
| 161428_at   | 255   | 189.5 | 303   | 234.1 | 259.6 | 234.1 | 293.6 | 301.5 | 0.38497636  | 245.4   | 272.2   | 26.8   | 0.901542983 | 0.3598  | 1.119  |
| 161429_at   | 60.1  | 51.9  | 184.9 | 53.5  | 160.3 | 130.4 | 174.8 | 94.3  | 0.220835479 | 87.6    | 139.95  | 52.35  | 0.625937835 | 0.1207  | 1.829  |
| 161430_at   | 36.8  | 51    | 44.8  | 39.7  | 45.1  | 28.3  | 38    | 63.8  | 0.933179909 | 43.075  | 43.8    | 0.725  | 0.983447489 | 0.9193  | -1.02  |
| 161431_i_at | 3.9   | 4.5   | 6.5   | 7     | 8.7   | 9.1   | 4.9   | 8.2   | 0.117413792 | 5.475   | 7.725   | 2.25   | 0.708737864 | 0.1426  | 1.406  |
| 161432_f_at | 250.9 | 240.8 | 215.9 | 263.9 | 181.6 | 246.4 | 476.4 | 331.6 | 0.377393198 | 242.875 | 309     | 66.125 | 0.786003236 | 0.4255  | 1.197  |
| 161433_f_at | 158.8 | 118.6 | 158.6 | 185.2 | 172.8 | 205.1 | 210.5 | 149.2 | 0.193883417 | 155.3   | 184.4   | 29.1   | 0.842190889 | 0.2045  | 1.191  |
| 161434_r_at | 13.8  | 52.5  | 19.8  | 14    | 129.2 | 13.7  | 18.8  | 84.7  | 0.28495216  | 25.025  | 61.6    | 36.575 | 0.40625     | 0.3384  | 1.936  |
| 161435_i_at | 17.5  | 32.4  | 9.6   | 34.7  | 20.4  | 18.8  | 35.3  | 45.3  | 0.49098748  | 23.55   | 29.95   | 6.4    | 0.786310518 | 0.4559  | 1.342  |
| 161436_s_at | 46.9  | 72.4  | 69.4  | 56.4  | 86.5  | 76.2  | 72.6  | 71.8  | 0.074590632 | 61.275  | 76.775  | 15.5   | 0.798111364 | 0.07287 | 1.268  |
| 161437_f_at | 132.5 | 108.5 | 115   | 118.7 | 145.5 | 108.2 | 81.8  | 120.6 | 0.760056985 | 118.675 | 114.025 | 4.65   | 1.040780531 | 0.6623  | -1.06  |
| 161438_r_at | 30.8  | 8.3   | 2.1   | 2.5   | 17.6  | 18.3  | 28.1  | 1.7   | 0.551699507 | 10.925  | 16.425  | 5.5    | 0.665144597 | 0.5165  | 1.85   |
| 161439_f_at | 414.3 | 368.4 | 417.8 | 396.5 | 302.2 | 441.1 | 425.8 | 329   | 0.537721701 | 399.25  | 374.525 | 24.725 | 1.066016955 | 0.4687  | -1.079 |



|             |        |        |        |        |        |        |        |        |             |          |         |         |             |         |        |
|-------------|--------|--------|--------|--------|--------|--------|--------|--------|-------------|----------|---------|---------|-------------|---------|--------|
| 161440_r_at | 14.4   | 24.7   | 18.8   | 13.7   | 9.5    | 24.3   | 7.2    | 20     | 0.606448632 | 17.9     | 15.25   | 2.65    | 1.173770492 | 0.4626  | -1.287 |
| 161441_f_at | 215.9  | 151    | 234.3  | 208.7  | 195.3  | 201.8  | 330.3  | 266.1  | 0.265556916 | 202.475  | 248.375 | 45.9    | 0.815198792 | 0.2634  | 1.214  |
| 161442_at   | 2.5    | 6.9    | 6.8    | 6.4    | 9      | 3.6    | 12.3   | 4.4    | 0.502182105 | 5.65     | 7.325   | 1.675   | 0.771331058 | 0.5863  | 1.244  |
| 161443_r_at | 13.9   | 12.9   | 2.2    | 3.4    | 13.2   | 0.7    | 2.4    | 1.7    | 0.428734954 | 8.1      | 4.5     | 3.6     | 1.8         | 0.2889  | -2.439 |
| 161444_f_at | 163.2  | 314.1  | 180.3  | 257.2  | 287.9  | 196.5  | 277.7  | 257.7  | 0.547217946 | 228.7    | 254.95  | 26.25   | 0.897038635 | 0.4769  | 1.142  |
| 161445_at   | 22.5   | 29.6   | 40.1   | 31.4   | 38.9   | 12.8   | 2.5    | 39.3   | 0.494670478 | 30.9     | 23.375  | 7.525   | 1.321925134 | 0.3239  | -2.039 |
| 161446_r_at | 983.2  | 1033.1 | 1047.8 | 1138.3 | 1144.8 | 1093.5 | 969.6  | 1420.1 | 0.35390923  | 1050.6   | 1157    | 106.4   | 0.908038029 | 0.3413  | -1.092 |
| 161447_f_at | 24.2   | 58.6   | 6.3    | 44.4   | 61.4   | 31.7   | 22.7   | 35.3   | 0.767375827 | 33.375   | 37.775  | 4.4     | 0.883520847 | 0.548   | 1.41   |
| 161448_f_at | 2.2    | 3.8    | 2.2    | 3.8    | 3.7    | 5      | 4.1    | 3.2    | 0.147647468 | 3        | 4       | 1       | 0.75        | 0.1524  | 1.35   |
| 161449_f_at | 21.2   | 30.6   | 33.6   | 44.7   | 34.8   | 36.2   | 33.6   | 14.3   | 0.706328459 | 32.525   | 29.725  | 2.8     | 1.094196804 | 0.6774  | -1.125 |
| 161450_r_at | 25.3   | 3.4    | 2.9    | 15.6   | 17.9   | 3.8    | 3.5    | 6.5    | 0.568327827 | 11.8     | 7.925   | 3.875   | 1.488958991 | 0.7306  | -1.267 |
| 161451_r_at | 52.2   | 33     | 40.6   | 44.3   | 83     | 21.5   | 23.3   | 56.2   | 0.832310065 | 42.525   | 46      | 3.475   | 0.924456522 | 0.846   | -1.073 |
| 161452_f_at | 24.5   | 26.1   | 30.5   | 37.8   | 43.8   | 33.4   | 26.3   | 30.9   | 0.447302572 | 29.725   | 33.6    | 3.875   | 0.884672619 | 0.4413  | 1.126  |
| 161453_r_at | 26.7   | 8.6    | 14.7   | 17     | 26.6   | 19.9   | 14.5   | 16.7   | 0.583821569 | 16.75    | 19.425  | 2.675   | 0.862290862 | 0.4831  | 1.221  |
| 161454_r_at | 154.5  | 248.7  | 188.3  | 230.5  | 147.3  | 256.9  | 341.4  | 304    | 0.287671661 | 205.5    | 262.4   | 56.9    | 0.783155488 | 0.3572  | 1.239  |
| 161455_r_at | 819.8  | 783.5  | 769.9  | 903.7  | 1137.6 | 709.9  | 861.8  | 1161.1 | 0.271699061 | 819.225  | 967.6   | 148.375 | 0.846656676 | 0.2753  | 1.16   |
| 161456_f_at | 95.9   | 87.8   | 111.5  | 75.1   | 66.2   | 115.2  | 129.3  | 78.3   | 0.792717754 | 92.575   | 97.25   | 4.675   | 0.951928021 | 0.9026  | -1.023 |
| 161457_at   | 29.5   | 62.9   | 42.7   | 87.1   | 46.1   | 37.1   | 66.6   | 47     | 0.671988151 | 55.55    | 49.2    | 6.35    | 1.129065041 | 0.8197  | -1.065 |
| 161458_at   | 662.8  | 568.2  | 730.5  | 692.3  | 673.6  | 602.9  | 683.7  | 783    | 0.674984122 | 663.45   | 685.8   | 22.35   | 0.967410324 | 0.679   | -1.034 |
| 161459_f_at | 22.4   | 0.9    | 23.2   | 3.1    | 26.9   | 1.4    | 4.1    | 7.5    | 0.781204563 | 12.4     | 9.975   | 2.425   | 1.243107769 | 0.9541  | -1.062 |
| 161460_r_at | 4.2    | 23.3   | 14.8   | 18.9   | 3.5    | 6.4    | 7.4    | 20.1   | 0.321144336 | 15.3     | 9.35    | 5.95    | 1.636363636 | 0.361   | -1.684 |
| 161461_at   | 2.7    | 1.9    | 10.6   | 3.3    | 17.3   | 3.7    | 3.5    | 5.4    | 0.494532192 | 4.625    | 7.475   | 2.85    | 0.618729097 | 0.3982  | 1.612  |
| 161462_r_at | 24.1   | 34.4   | 41.2   | 28.5   | 25.1   | 31.3   | 31.1   | 41.6   | 0.965905275 | 32.05    | 32.275  | 0.225   | 0.99302866  | 0.9494  | -1.01  |
| 161463_f_at | 4.8    | 5.9    | 3.4    | 7.1    | 5.2    | 5.6    | 3.9    | 4.7    | 0.630589399 | 5.3      | 4.85    | 0.45    | 1.092783505 | 0.7238  | -1.067 |
| 161464_f_at | 170.3  | 233.4  | 166.8  | 242.7  | 149.5  | 217.5  | 175.6  | 369.8  | 0.665669584 | 203.3    | 228.1   | 24.8    | 0.891275756 | 0.7693  | -1.07  |
| 161465_r_at | 725.3  | 232    | 980.5  | 434    | 1110.7 | 591.4  | 280.3  | 462.8  | 0.942116715 | 592.95   | 611.3   | 18.35   | 0.969982006 | 0.9221  | -1.044 |
| 161466_r_at | 157.2  | 105.8  | 133    | 184.6  | 149.5  | 148.2  | 142.8  | 154.5  | 0.845340762 | 145.15   | 148.75  | 3.6     | 0.975798319 | 0.721   | -1.046 |
| 161467_f_at | 167.9  | 170.4  | 135.7  | 205.8  | 134.7  | 220.5  | 151.8  | 176.4  | 0.970775054 | 169.95   | 170.85  | 0.9     | 0.994732221 | 0.9938  | -1.001 |
| 161468_f_at | 72.4   | 18.8   | 63.9   | 64.5   | 109.4  | 44.8   | 49.7   | 17.9   | 0.98169321  | 54.9     | 55.45   | 0.55    | 0.990081154 | 0.9012  | -1.065 |
| 161469_r_at | 484.7  | 380.8  | 551.1  | 474.7  | 582.4  | 484.6  | 511.5  | 449.6  | 0.476833525 | 472.825  | 507.025 | 34.2    | 0.932547705 | 0.4619  | -1.077 |
| 161470_r_at | 1      | 4.7    | 2.4    | 5.8    | 2.4    | 6.5    | 1.5    | 5.6    | 0.75816288  | 3.475    | 4       | 0.525   | 0.86875     | 0.7753  | 1.169  |
| 161471_f_at | 36.4   | 41.4   | 24     | 27     | 25.9   | 22.4   | 37.1   | 28.7   | 0.50146346  | 32.2     | 28.525  | 3.675   | 1.128834356 | 0.519   | -1.12  |
| 161472_r_at | 99.3   | 105.3  | 86.2   | 89.9   | 128.7  | 118.5  | 100.1  | 109.1  | 0.05012924  | 95.175   | 114.1   | 18.925  | 0.834136722 | 0.04332 | 1.198  |
| 161473_f_at | 4.8    | 9.8    | 1.1    | 1.6    | 15.6   | 1.1    | 0.9    | 11.6   | 0.515962993 | 4.325    | 7.3     | 2.975   | 0.592465753 | 0.8373  | 1.214  |
| 161474_r_at | 316.4  | 358.4  | 528.4  | 355    | 721    | 426.2  | 488.6  | 356.4  | 0.292852859 | 389.55   | 498.05  | 108.5   | 0.782150387 | 0.2633  | 1.259  |
| 161475_f_at | 23.6   | 26.4   | 7.7    | 7.8    | 4.6    | 6.2    | 5.2    | 12.1   | 0.158293779 | 16.375   | 7.025   | 9.35    | 2.330960854 | 0.1081  | -2.131 |
| 161476_at   | 474.1  | 265    | 358    | 469.6  | 296.2  | 330.5  | 378.8  | 365.4  | 0.413332661 | 391.675  | 342.725 | 48.95   | 1.142825881 | 0.482   | -1.117 |
| 161477_r_at | 5.5    | 4.3    | 21     | 6.1    | 7      | 21.6   | 10.1   | 13.8   | 0.470273622 | 9.225    | 13.125  | 3.9     | 0.702857143 | 0.2993  | 1.626  |
| 161478_at   | 20.4   | 5.2    | 41.1   | 26     | 42.5   | 5.1    | 9.7    | 66.5   | 0.655198091 | 23.175   | 30.95   | 7.775   | 0.748788368 | 0.9489  | -1.051 |
| 161479_f_at | 45.6   | 26.1   | 40.6   | 40.4   | 32.3   | 55.7   | 7.3    | 36.7   | 0.656862047 | 38.175   | 33      | 5.175   | 1.156818182 | 0.4765  | -1.42  |
| 161480_i_at | 7463.6 | 6417.5 | 6511   | 5413.8 | 6233   | 6134.5 | 6441.1 | 6494.8 | 0.786650352 | 6451.475 | 6325.85 | 125.625 | 1.019858991 | 0.8469  | -1.014 |
| 161481_f_at | 3.2    | 4.6    | 7.6    | 7.1    | 6.8    | 4.6    | 5.9    | 7.3    | 0.680354967 | 5.625    | 6.15    | 0.525   | 0.914634146 | 0.5911  | 1.136  |
| 161482_f_at | 20.2   | 11.6   | 22.7   | 39     | 6.7    | 41.1   | 28.4   | 37.8   | 0.615456695 | 23.375   | 28.5    | 5.125   | 0.820175439 | 0.8643  | -1.092 |
| 161483_r_at | 14.3   | 2.8    | 21.4   | 14.6   | 6.7    | 7.3    | 5      | 3.8    | 0.142906832 | 13.275   | 5.7     | 7.575   | 2.328947368 | 0.2269  | -1.905 |
| 161484_r_at | 2.8    | 5.8    | 7.8    | 7.7    | 9.1    | 10.6   | 4.1    | 3.4    | 0.731673672 | 6.025    | 6.8     | 0.775   | 0.886029412 | 0.8504  | -1.076 |
| 161485_r_at | 43.5   | 52.7   | 51.4   | 49.7   | 79.5   | 52.9   | 68.6   | 58.3   | 0.072201657 | 49.325   | 64.825  | 15.5    | 0.760894717 | 0.03834 | 1.301  |
| 161486_f_at | 16.2   | 33     | 27.1   | 40.9   | 72.1   | 20.4   | 32.4   | 66.7   | 0.247162982 | 29.3     | 47.9    | 18.6    | 0.611691023 | 0.2875  | 1.524  |
| 161487_f_at | 622.5  | 472.8  | 549.2  | 600.2  | 548.4  | 540.6  | 580.9  | 506.8  | 0.664751863 | 561.175  | 544.175 | 17      | 1.03123995  | 0.7073  | -1.027 |
| 161488_r_at | 5.6    | 4.8    | 12.5   | 25.1   | 6.2    | 5.5    | 6.8    | 40.4   | 0.792185123 | 12       | 14.725  | 2.725   | 0.814940577 | 0.9655  | -1.028 |
| 161489_r_at | 46.1   | 4.7    | 6.7    | 23.3   | 5.2    | 38.3   | 35.1   | 26.7   | 0.633042005 | 20.2     | 26.325  | 6.125   | 0.767331434 | 0.5654  | 1.539  |
| 161490_at   | 18.6   | 22.9   | 6.6    | 15.4   | 12.5   | 3.3    | 17.3   | 11.2   | 0.329453653 | 15.875   | 11.075  | 4.8     | 1.433408578 | 0.3914  | -1.522 |
| 161491_r_at | 66.6   | 80.9   | 57.6   | 42.4   | 24.8   | 39.9   | 46.3   | 51.1   | 0.079285443 | 61.875   | 40.525  | 21.35   | 1.526835287 | 0.08571 | -1.54  |
| 161492_i_at | 549.6  | 542.2  | 594.3  | 677.7  | 698.3  | 551    | 524    | 711.1  | 0.623498685 | 590.95   | 621.1   | 30.15   | 0.951457092 | 0.6537  | -1.045 |
| 161493_at   | 12.8   | 50.2   | 18.9   | 40.8   | 79.7   | 3.5    | 31     | 53.8   | 0.569110057 | 30.675   | 42      | 11.325  | 0.730357143 | 0.9844  | -1.016 |
| 161494_f_at | 225    | 447.8  | 390.5  | 265    | 625.9  | 338.3  | 463.6  | 389.1  | 0.186889265 | 332.075  | 454.225 | 122.15  | 0.731080412 | 0.1711  | 1.383  |
| 161495_r_at | 63.8   | 31.2   | 66.3   | 92.1   | 46.2   | 64     | 72.9   | 75.4   | 0.931895335 | 63.35    | 64.625  | 1.275   | 0.980270793 | 0.7838  | -1.076 |



|             |       |        |        |        |        |        |        |        |             |         |         |        |             |         |        |
|-------------|-------|--------|--------|--------|--------|--------|--------|--------|-------------|---------|---------|--------|-------------|---------|--------|
| 161496_r_at | 199.2 | 185.6  | 209.5  | 125.4  | 171.7  | 165.1  | 160    | 80.6   | 0.258978869 | 179.925 | 144.35  | 35.575 | 1.246449602 | 0.2989  | -1.277 |
| 161497_f_at | 53.1  | 124.3  | 101.1  | 156.1  | 170.2  | 142.8  | 136.8  | 32.8   | 0.758736936 | 108.65  | 120.65  | 12     | 0.900538748 | 0.9813  | -1.011 |
| 161498_at   | 1188  | 1082.7 | 1107.3 | 1297.6 | 1428.6 | 1255.9 | 1333.1 | 1160.8 | 0.144752537 | 1168.9  | 1294.6  | 125.7  | 0.902904372 | 0.1412  | -1.107 |
| 161499_f_at | 242.4 | 284.3  | 322.7  | 337.8  | 204.5  | 273.5  | 294.8  | 232.9  | 0.173983929 | 296.8   | 251.425 | 45.375 | 1.180471314 | 0.1804  | -1.183 |
| 161500_i_at | 149   | 158.1  | 214.3  | 177.1  | 246.1  | 163.3  | 197.1  | 221.6  | 0.207667914 | 174.625 | 207.025 | 32.4   | 0.843497162 | 0.2059  | 1.184  |
| 161501_at   | 25.7  | 11.9   | 8.3    | 22.5   | 11     | 6.7    | 8.7    | 41.1   | 0.981391178 | 17.1    | 16.875  | 0.225  | 1.013333333 | 0.7052  | -1.212 |
| 161502_r_at | 76.8  | 86.6   | 95.1   | 101.1  | 117.5  | 109.1  | 96.4   | 128.2  | 0.038588006 | 89.9    | 112.8   | 22.9   | 0.796985816 | 0.03717 | 1.254  |
| 161503_f_at | 53.2  | 49.3   | 46.6   | 55.9   | 30.5   | 26.1   | 53.5   | 36.5   | 0.088485742 | 51.25   | 36.65   | 14.6   | 1.398362892 | 0.05956 | -1.447 |
| 161504_i_at | 94.9  | 131.2  | 118.8  | 119.7  | 36.2   | 69.3   | 80.8   | 102.3  | 0.041340338 | 116.15  | 72.15   | 44     | 1.60984061  | 0.06105 | -1.71  |
| 161505_i_at | 28.1  | 15.7   | 9.8    | 15     | 21.5   | 9.4    | 11     | 9.3    | 0.407677751 | 17.15   | 12.8    | 4.35   | 1.33984375  | 0.3681  | -1.332 |
| 161506_r_at | 148   | 139.1  | 219.8  | 206.9  | 179.6  | 174.3  | 246.8  | 193.7  | 0.4736322   | 178.45  | 198.6   | 20.15  | 0.898539778 | 0.435   | -1.124 |
| 161507_f_at | 68    | 43.7   | 50.8   | 61.7   | 64.2   | 45.3   | 59.7   | 54.2   | 0.977533341 | 56.05   | 55.85   | 0.2    | 1.003581021 | 0.9855  | -1.002 |
| 161508_at   | 15.1  | 8.9    | 10     | 5.5    | 13.3   | 11.4   | 7.5    | 6      | 0.905043934 | 9.875   | 9.55    | 0.325  | 1.034031414 | 0.9505  | -1.018 |
| 161509_at   | 67.3  | 65.8   | 61.2   | 65.3   | 57     | 57.6   | 50.4   | 94.9   | 0.994576369 | 64.9    | 64.975  | 0.075  | 0.99884571  | 0.8375  | -1.031 |
| 161510_f_at | 713.3 | 697.6  | 807.3  | 810.4  | 873.6  | 737.4  | 780.5  | 842.7  | 0.275875349 | 757.15  | 808.55  | 51.4   | 0.936429411 | 0.2769  | -1.068 |
| 161511_f_at | 4.8   | 22.8   | 5.6    | 31.1   | 42.6   | 21.3   | 6.8    | 30.4   | 0.392197516 | 16.075  | 25.275  | 9.2    | 0.636003956 | 0.3916  | 1.773  |
| 161512_r_at | 146.6 | 203.5  | 268.7  | 236.7  | 272.2  | 239.8  | 319.5  | 258.8  | 0.116197696 | 213.875 | 272.575 | 58.7   | 0.784646428 | 0.1199  | 1.298  |
| 161513_r_at | 35    | 14.8   | 28.5   | 25.6   | 61     | 25.3   | 28.2   | 24.4   | 0.416919801 | 25.975  | 34.725  | 8.75   | 0.748020158 | 0.3971  | 1.295  |
| 161514_at   | 358.7 | 323    | 367.1  | 324.2  | 418.5  | 307.3  | 477.1  | 400.5  | 0.201946972 | 343.25  | 400.85  | 57.6   | 0.856305351 | 0.1917  | 1.155  |
| 161515_i_at | 4.7   | 6.4    | 8.6    | 6.4    | 4.9    | 35.2   | 5.8    | 7.5    | 0.419970838 | 6.525   | 13.35   | 6.825  | 0.488764045 | 0.4521  | 1.458  |
| 161516_r_at | 23    | 20.2   | 33.2   | 24.4   | 17.2   | 28.3   | 31.7   | 22.4   | 0.946190896 | 25.2    | 24.9    | 0.3    | 1.012048193 | 0.9056  | -1.021 |
| 161517_at   | 21.9  | 13.1   | 13.8   | 26.6   | 4.9    | 29.2   | 8      | 38.5   | 0.8896648   | 18.85   | 20.15   | 1.3    | 0.935483871 | 0.6937  | -1.244 |
| 161518_r_at | 24.4  | 16.1   | 20.4   | 14.5   | 32.8   | 29.3   | 24.8   | 30.6   | 0.010681739 | 18.85   | 29.375  | 10.525 | 0.641702128 | 0.01271 | 1.581  |
| 161519_f_at | 309.9 | 217.8  | 229.2  | 282.7  | 147.2  | 255.6  | 210.6  | 395.1  | 0.897996075 | 259.9   | 252.125 | 7.775  | 1.030837878 | 0.72    | -1.087 |
| 161520_at   | 2.7   | 2.6    | 13.3   | 3      | 22.3   | 3.2    | 2.7    | 2.7    | 0.692885107 | 5.4     | 7.725   | 2.325  | 0.699029126 | 0.8353  | 1.151  |
| 161521_at   | 5.7   | 8.5    | 5.6    | 2.8    | 5.7    | 3.8    | 15.3   | 3.1    | 0.687294174 | 5.65    | 6.975   | 1.325  | 0.810035842 | 0.8627  | -1.079 |
| 161522_i_at | 388.5 | 223.2  | 358.1  | 361.3  | 652.2  | 206.9  | 358.8  | 452.1  | 0.446476953 | 332.775 | 417.5   | 84.725 | 0.797065868 | 0.5618  | 1.182  |
| 161523_r_at | 23.3  | 36.6   | 43.7   | 24.8   | 24     | 37.6   | 5.3    | 32.7   | 0.439754697 | 32.1    | 24.9    | 7.2    | 1.289156627 | 0.3864  | -1.556 |
| 161524_r_at | 93.1  | 74.6   | 93.8   | 76.4   | 79.7   | 81.6   | 67.6   | 113.7  | 0.920469207 | 84.475  | 85.65   | 1.175  | 0.986281378 | 0.9939  | -1.001 |
| 161525_f_at | 8.9   | 16.8   | 9.2    | 1.1    | 4.5    | 10.1   | 8.5    | 15.3   | 0.883591242 | 9       | 9.6     | 0.6    | 0.9375      | 0.6201  | 1.397  |
| 161526_r_at | 11.1  | 21.1   | 29.8   | 43.6   | 63.6   | 16.9   | 18.6   | 51.5   | 0.447785473 | 26.4    | 37.65   | 11.25  | 0.701195219 | 0.5236  | 1.355  |
| 161527_r_at | 0.4   | 7.4    | 0.8    | 0.1    | 1.1    | 1.4    | 1      | 0.8    | 0.574230477 | 2.175   | 1.075   | 1.1    | 2.023255814 | 0.6231  | 1.694  |
| 161528_r_at | 52.9  | 49.4   | 40     | 64.1   | 37.1   | 34.5   | 65.5   | 111.6  | 0.604259223 | 51.6    | 62.175  | 10.575 | 0.829915561 | 0.7822  | -1.088 |
| 161529_r_at | 50.6  | 32.5   | 37.4   | 63.6   | 36.7   | 40.1   | 35.5   | 67.1   | 0.912416948 | 46.025  | 44.85   | 1.175  | 1.026198439 | 0.9028  | -1.027 |
| 161530_r_at | 23.1  | 30.1   | 58.9   | 45.1   | 35.3   | 33.5   | 30.5   | 48.5   | 0.804053607 | 39.3    | 36.95   | 2.35   | 1.063599459 | 0.9582  | -1.013 |
| 161531_r_at | 8.6   | 7      | 8.5    | 2.7    | 2      | 5.7    | 0.7    | 9.7    | 0.413383558 | 6.7     | 4.525   | 2.175  | 1.480662983 | 0.3105  | -2.015 |
| 161532_f_at | 30.7  | 9.1    | 19.1   | 8.4    | 5.4    | 7.5    | 7.2    | 9.9    | 0.172028972 | 16.825  | 7.5     | 9.325  | 2.243333333 | 0.0861  | -1.987 |
| 161533_at   | 22.5  | 20.6   | 40.5   | 32.2   | 33.4   | 23.6   | 20.1   | 34     | 0.846314325 | 28.95   | 27.775  | 1.175  | 1.04230423  | 0.8942  | -1.029 |
| 161534_f_at | 73.2  | 82     | 56.5   | 107.3  | 103.2  | 112.5  | 89.5   | 103.8  | 0.122019734 | 79.75   | 102.25  | 22.5   | 0.7799511   | 0.1029  | 1.312  |
| 161535_at   | 392.3 | 423.3  | 528.3  | 547.3  | 378.1  | 510.4  | 510.1  | 522.6  | 0.888626383 | 472.8   | 480.3   | 7.5    | 0.98438476  | 0.8833  | -1.017 |
| 161536_r_at | 32.2  | 5.5    | 34.6   | 17.5   | 19.2   | 23     | 4.6    | 43.1   | 0.9981705   | 22.45   | 22.475  | 0.025  | 0.998887653 | 0.9393  | -1.052 |
| 161537_f_at | 30.8  | 40.2   | 46.9   | 33.6   | 69     | 36.1   | 54.7   | 43.9   | 0.170567347 | 37.875  | 50.925  | 13.05  | 0.743740795 | 0.1464  | 1.324  |
| 161538_r_at | 2.4   | 2.2    | 1.7    | 0.8    | 8.8    | 1.5    | 2.6    | 2      | 0.338907299 | 1.775   | 3.725   | 1.95   | 0.476510067 | 0.2816  | 1.732  |
| 161539_f_at | 20.5  | 24.3   | 19.7   | 29.9   | 15.5   | 26.2   | 12.6   | 19     | 0.210978356 | 23.6    | 18.325  | 5.275  | 1.287858117 | 0.1777  | -1.323 |
| 161540_r_at | 10.9  | 10.6   | 10.2   | 8.6    | 7.8    | 5.9    | 18.2   | 2.7    | 0.701479448 | 10.075  | 8.65    | 1.425  | 1.164739884 | 0.3786  | -1.463 |
| 161541_r_at | 8.2   | 12.8   | 47.8   | 40.7   | 10.1   | 21.7   | 9      | 22     | 0.332723263 | 27.375  | 15.7    | 11.675 | 1.743630573 | 0.4615  | -1.475 |
| 161542_r_at | 100.4 | 72.5   | 453.8  | 741.4  | 233.1  | 436.3  | 412.1  | 89.6   | 0.794987426 | 342.025 | 292.775 | 49.25  | 1.168217915 | 0.879   | 1.113  |
| 161543_at   | 66.4  | 54.9   | 69.8   | 38.9   | 19.2   | 65.4   | 58     | 67.3   | 0.720137466 | 57.5    | 52.475  | 5.025  | 1.095759886 | 0.6125  | -1.192 |
| 161544_r_at | 4.4   | 8.9    | 24.5   | 9      | 18.4   | 9.4    | 7.7    | 0.6    | 0.657223624 | 11.7    | 9.025   | 2.675  | 1.296398892 | 0.5036  | -1.801 |
| 161545_r_at | 63.2  | 88.1   | 100.8  | 119.1  | 125    | 80.8   | 72.7   | 110.3  | 0.804428653 | 92.8    | 97.2    | 4.4    | 0.95473251  | 0.803   | -1.05  |
| 161546_r_at | 132.8 | 73.2   | 72.8   | 86     | 160.5  | 29.6   | 63.3   | 112    | 0.996456439 | 91.2    | 91.35   | 0.15   | 0.998357964 | 0.7208  | -1.16  |
| 161547_f_at | 116.2 | 31     | 43.8   | 97.5   | 55.6   | 31.8   | 40.9   | 40.6   | 0.243583329 | 72.125  | 42.225  | 29.9   | 1.708111308 | 0.2642  | -1.513 |
| 161548_r_at | 58.3  | 56.1   | 59.1   | 109.9  | 63.3   | 69.3   | 64.4   | 100.4  | 0.832141895 | 70.85   | 74.35   | 3.5    | 0.952925353 | 0.7234  | -1.075 |
| 161549_f_at | 52.2  | 44.6   | 87.6   | 26.9   | 62.5   | 42.1   | 55.7   | 92.3   | 0.557069016 | 52.825  | 63.15   | 10.325 | 0.836500396 | 0.4691  | 1.253  |
| 161550_r_at | 10.3  | 7.5    | 12.2   | 9.1    | 1.4    | 9.2    | 23     | 16.1   | 0.611754935 | 9.775   | 12.425  | 2.65   | 0.786720322 | 0.8304  | -1.15  |
| 161551_f_at | 115.4 | 75.7   | 151.1  | 110.4  | 114    | 101.9  | 121.7  | 113.1  | 0.977905148 | 113.15  | 112.675 | 0.475  | 1.004215665 | 0.8798  | -1.023 |



|             |        |        |        |        |        |        |        |        |             |          |          |         |             |         |        |
|-------------|--------|--------|--------|--------|--------|--------|--------|--------|-------------|----------|----------|---------|-------------|---------|--------|
| 161552_i_at | 1.3    | 9.3    | 0.7    | 0.5    | 2.9    | 0.9    | 6.5    | 10.1   | 0.491867654 | 2.95     | 5.1      | 2.15    | 0.578431373 | 0.3102  | 2.509  |
| 161553_i_at | 13     | 7.6    | 20.9   | 15.9   | 49     | 9.9    | 17.8   | 4.9    | 0.592291801 | 14.35    | 20.4     | 6.05    | 0.703431373 | 0.9105  | -1.064 |
| 161554_r_at | 20.2   | 22.2   | 72.9   | 18.1   | 51.9   | 54.6   | 17     | 50.2   | 0.552997289 | 33.35    | 43.425   | 10.075  | 0.767990789 | 0.4432  | 1.423  |
| 161555_f_at | 26.8   | 5.4    | 20.8   | 6.4    | 9      | 7.7    | 18.1   | 9.7    | 0.555562373 | 14.85    | 11.125   | 3.725   | 1.334831461 | 0.7983  | -1.126 |
| 161556_at   | 21.5   | 9.6    | 7.4    | 14.5   | 16.4   | 7.8    | 56.7   | 8.2    | 0.50216932  | 13.25    | 22.275   | 9.025   | 0.594837262 | 0.6505  | 1.28   |
| 161557_at   | 240.6  | 190.1  | 230.4  | 156.5  | 192.7  | 248.3  | 236.9  | 231.8  | 0.358544857 | 204.4    | 227.425  | 23.025  | 0.898757832 | 0.3438  | 1.123  |
| 161558_f_at | 71.4   | 42.9   | 87.6   | 58.6   | 76.7   | 76     | 73.2   | 99.6   | 0.208337686 | 65.125   | 81.375   | 16.25   | 0.80030722  | 0.1877  | 1.283  |
| 161559_i_at | 62.1   | 41.1   | 48.4   | 85.4   | 100.6  | 26.7   | 30.1   | 16.3   | 0.50069339  | 59.25    | 43.425   | 15.825  | 1.364421416 | 0.2594  | -1.683 |
| 161560_f_at | 196.4  | 162.1  | 135.5  | 106.5  | 213.7  | 153.6  | 208.1  | 152.7  | 0.256957493 | 150.125  | 182.025  | 31.9    | 0.824749348 | 0.2464  | 1.228  |
| 161561_r_at | 935.3  | 888.9  | 1055.9 | 696.5  | 1494.2 | 908.6  | 1148.1 | 743.8  | 0.370532991 | 894.15   | 1073.675 | 179.525 | 0.832793909 | 0.3933  | 1.173  |
| 161562_f_at | 271.4  | 328.2  | 202.1  | 237.2  | 236.4  | 209.6  | 243.3  | 253.5  | 0.449192868 | 259.725  | 235.7    | 24.025  | 1.10193042  | 0.4787  | -1.087 |
| 161563_r_at | 2794.6 | 2833.2 | 3515.6 | 3138.9 | 1935.3 | 2903.7 | 2516   | 3292.3 | 0.277931487 | 3070.575 | 2661.825 | 408.75  | 1.153560057 | 0.2577  | -1.171 |
| 161564_r_at | 34.4   | 22.3   | 10.3   | 29.7   | 8.1    | 7      | 5.8    | 30.1   | 0.195132052 | 24.175   | 12.75    | 11.425  | 1.896078431 | 0.1365  | -2.207 |
| 161565_r_at | 26.7   | 14.9   | 8.6    | 2.8    | 29.2   | 14.2   | 4.7    | 29.8   | 0.465191681 | 13.25    | 19.475   | 6.225   | 0.680359435 | 0.5112  | 1.572  |
| 161566_r_at | 32.2   | 19.5   | 23.3   | 30.5   | 13.3   | 2.9    | 13.7   | 5.1    | 0.005086928 | 26.375   | 8.75     | 17.625  | 3.014285714 | 0.01841 | -3.586 |
| 161567_r_at | 1.6    | 0.7    | 2      | 4.5    | 1.4    | 1      | 0.7    | 1.9    | 0.334530396 | 2.2      | 1.25     | 0.95    | 1.76        | 0.4045  | -1.493 |
| 161568_f_at | 16.3   | 65.8   | 43.6   | 23.8   | 30     | 35.5   | 65.6   | 87     | 0.362546577 | 37.375   | 54.525   | 17.15   | 0.685465383 | 0.3286  | 1.53   |
| 161569_f_at | 30.4   | 30     | 10.5   | 18.7   | 26.6   | 15.3   | 39.3   | 21.6   | 0.653987278 | 22.4     | 25.7     | 3.3     | 0.871595331 | 0.6246  | 1.179  |
| 161570_r_at | 14.5   | 19.1   | 6.9    | 3.1    | 27.1   | 18.8   | 22.8   | 14.1   | 0.078270933 | 10.9     | 20.7     | 9.8     | 0.526570048 | 0.102   | 2.305  |
| 161571_f_at | 42.9   | 33.8   | 4.4    | 35.9   | 11.2   | 15.9   | 21.7   | 56     | 0.825878257 | 29.25    | 26.2     | 3.05    | 1.116412214 | 0.9858  | -1.012 |
| 161572_r_at | 11.1   | 10.9   | 17     | 29.7   | 12.8   | 11.3   | 14.4   | 16.9   | 0.513095034 | 17.175   | 13.85    | 3.325   | 1.240072202 | 0.6103  | -1.145 |
| 161573_at   | 187.1  | 186.8  | 154.9  | 304    | 140.5  | 233.2  | 230.7  | 316.1  | 0.667927847 | 208.2    | 230.125  | 21.925  | 0.904725693 | 0.6884  | -1.098 |
| 161574_r_at | 7.1    | 10     | 8.9    | 4.8    | 0.6    | 11.1   | 12.9   | 3.6    | 0.847259984 | 7.7      | 7.05     | 0.65    | 1.092198582 | 0.4607  | -1.766 |
| 161575_f_at | 33.6   | 25.8   | 39.1   | 40     | 45.5   | 37.7   | 55.1   | 21.5   | 0.531454595 | 34.625   | 39.95    | 5.325   | 0.866708385 | 0.6686  | -1.107 |
| 161576_f_at | 226.9  | 204    | 278.5  | 272.3  | 285    | 243.8  | 311.8  | 255    | 0.27454922  | 245.425  | 273.9    | 28.475  | 0.8960387   | 0.268   | -1.12  |
| 161577_f_at | 7      | 2      | 3.1    | 7.7    | 2.9    | 3.1    | 13.4   | 6.3    | 0.625289181 | 4.95     | 6.425    | 1.475   | 0.770428016 | 0.6799  | 1.235  |
| 161578_r_at | 49.9   | 63.8   | 20.6   | 51.4   | 48.8   | 64.8   | 85.3   | 72.2   | 0.124760607 | 46.425   | 67.775   | 21.35   | 0.68498709  | 0.1636  | 1.551  |
| 161579_r_at | 4.2    | 2.9    | 23.9   | 3.4    | 5.9    | 3      | 24.7   | 4.7    | 0.896725251 | 8.6      | 9.575    | 0.975   | 0.898172324 | 0.7849  | 1.21   |
| 161580_f_at | 95.1   | 174    | 82.6   | 46.8   | 51.7   | 92     | 51.1   | 57.6   | 0.273497471 | 99.625   | 63.1     | 36.525  | 1.578843106 | 0.2566  | -1.462 |
| 161581_r_at | 67.8   | 74.5   | 93.6   | 91.6   | 79.3   | 91.5   | 60.2   | 86.7   | 0.802464742 | 81.875   | 79.425   | 2.45    | 1.030846711 | 0.7904  | -1.034 |
| 161582_r_at | 10.9   | 11.6   | 22.7   | 1.1    | 9.6    | 1.1    | 12.9   | 8.5    | 0.51665488  | 11.575   | 8.025    | 3.55    | 1.442367601 | 0.78    | -1.289 |
| 161583_at   | 4.9    | 5.6    | 4.5    | 8.4    | 7.7    | 10.4   | 32.1   | 5.1    | 0.288579193 | 5.85     | 13.825   | 7.975   | 0.423146474 | 0.1783  | 1.885  |
| 161584_r_at | 3      | 8.9    | 0.8    | 1      | 0.3    | 7.6    | 0.2    | 1.2    | 0.686166674 | 3.425    | 2.325    | 1.1     | 1.47311828  | 0.3998  | -2.412 |
| 161585_at   | 38.1   | 41.8   | 62.5   | 21.6   | 28.5   | 23.5   | 35.1   | 62.9   | 0.783250761 | 41       | 37.5     | 3.5     | 1.093333333 | 0.77    | -1.098 |
| 161586_f_at | 38.3   | 4.4    | 24.1   | 7.9    | 7.2    | 3.1    | 9.5    | 20.9   | 0.379864963 | 18.675   | 10.175   | 8.5     | 1.835380835 | 0.4665  | -1.638 |
| 161587_at   | 10.1   | 2.9    | 8.6    | 12.8   | 12.6   | 5.3    | 20.1   | 9.9    | 0.406000408 | 8.6      | 11.975   | 3.375   | 0.718162839 | 0.4401  | 1.426  |
| 161588_r_at | 6.8    | 7.4    | 6.3    | 9.9    | 21.5   | 11.3   | 11.1   | 9.6    | 0.122396907 | 7.6      | 13.375   | 5.775   | 0.568224299 | 0.0427  | 1.692  |
| 161589_at   | 7.9    | 7.3    | 9.4    | 6.3    | 5.2    | 5      | 10.3   | 7.8    | 0.665787418 | 7.725    | 7.075    | 0.65    | 1.091872792 | 0.5515  | -1.129 |
| 161590_r_at | 10.2   | 10.5   | 6.8    | 7.9    | 12     | 5.3    | 15.2   | 9.2    | 0.528185398 | 8.85     | 10.425   | 1.575   | 0.848920863 | 0.675   | -1.117 |
| 161591_r_at | 78.7   | 56.3   | 92.9   | 90.3   | 106.1  | 90.7   | 91.4   | 57.3   | 0.626225988 | 79.55    | 86.375   | 6.825   | 0.920984081 | 0.681   | -1.079 |
| 161592_at   | 19.7   | 3.1    | 11.7   | 3.5    | 4      | 4.3    | 17.6   | 10.6   | 0.943621994 | 9.5      | 9.125    | 0.375   | 1.04109589  | 0.9116  | -1.07  |
| 161593_r_at | 15.9   | 5.4    | 6.7    | 26.9   | 20.7   | 11.6   | 23.4   | 4.9    | 0.834945609 | 13.725   | 15.15    | 1.425   | 0.905940594 | 0.789   | 1.156  |
| 161594_f_at | 111.9  | 65.3   | 60.8   | 107.3  | 108.5  | 86.3   | 83     | 111.6  | 0.508167773 | 86.325   | 97.35    | 11.025  | 0.886748844 | 0.433   | 1.161  |
| 161595_at   | 33.5   | 31.7   | 53.1   | 52.9   | 62.3   | 32.4   | 19.3   | 54.1   | 0.94887823  | 42.8     | 42.025   | 0.775   | 1.018441404 | 0.7804  | -1.092 |
| 161596_f_at | 102.8  | 116.8  | 71.4   | 200.8  | 161.3  | 107.7  | 114.2  | 233    | 0.466282751 | 122.95   | 154.05   | 31.1    | 0.798117494 | 0.4101  | 1.28   |
| 161597_r_at | 8.4    | 0.6    | 15.4   | 0.5    | 1      | 4.7    | 2.5    | 12.5   | 0.819930971 | 6.225    | 5.175    | 1.05    | 1.202898551 | 0.7439  | 1.428  |
| 161598_at   | 9.8    | 46     | 12.3   | 29.4   | 23.8   | 20.9   | 12     | 11.4   | 0.461385297 | 24.375   | 17.025   | 7.35    | 1.431718062 | 0.616   | -1.242 |
| 161599_i_at | 24.6   | 24.6   | 29.8   | 21.4   | 83.6   | 25.1   | 32.7   | 32.3   | 0.26834916  | 25.1     | 43.425   | 18.325  | 0.57800806  | 0.1602  | 1.549  |
| 161600_r_at | 96.4   | 90.6   | 128.8  | 109    | 220.7  | 110.7  | 180    | 179.7  | 0.055030486 | 106.2    | 172.775  | 66.575  | 0.614672262 | 0.03084 | 1.593  |
| 161601_i_at | 25.4   | 42.6   | 68.7   | 9.2    | 60.2   | 24.2   | 105.4  | 14.9   | 0.56953171  | 36.475   | 51.175   | 14.7    | 0.712750366 | 0.6434  | 1.35   |
| 161602_at   | 1.8    | 17.4   | 9.5    | 15.5   | 1.5    | 7.3    | 1.3    | 2.7    | 0.107777352 | 11.05    | 3.2      | 7.85    | 3.453125    | 0.1158  | -3.295 |
| 161603_r_at | 235.4  | 268.4  | 240.5  | 235.5  | 275.2  | 290.4  | 280.1  | 289.4  | 0.009823229 | 244.95   | 283.775  | 38.825  | 0.86318386  | 0.0047  | 1.16   |
| 161604_r_at | 11     | 7.8    | 3.1    | 1.5    | 7.9    | 2.1    | 14.6   | 4.7    | 0.686016535 | 5.85     | 7.325    | 1.475   | 0.798634812 | 0.679   | 1.307  |
| 161605_f_at | 50.4   | 44.9   | 58.3   | 68.8   | 68.1   | 46.7   | 48.5   | 44.3   | 0.641016383 | 55.6     | 51.9     | 3.7     | 1.071290944 | 0.6155  | -1.074 |
| 161606_f_at | 116.3  | 175.9  | 211    | 120.3  | 247.4  | 107.9  | 124.1  | 144.2  | 0.999509107 | 155.875  | 155.9    | 0.025   | 0.999839641 | 0.9319  | -1.021 |
| 161607_r_at | 3.6    | 7.5    | 5.8    | 12.9   | 16.8   | 8.6    | 7.5    | 1.1    | 0.792590694 | 7.45     | 8.5      | 1.05    | 0.876470588 | 0.8475  | -1.136 |



|             |        |        |        |        |        |        |        |        |             |         |         |        |             |          |        |
|-------------|--------|--------|--------|--------|--------|--------|--------|--------|-------------|---------|---------|--------|-------------|----------|--------|
| 161608_r_at | 29.6   | 6.4    | 13.8   | 6.1    | 7.8    | 2.3    | 7.3    | 4.7    | 0.223056479 | 13.975  | 5.525   | 8.45   | 2.529411765 | 0.1321   | -2.266 |
| 161609_at   | 44.1   | 61     | 50.1   | 41.8   | 61.1   | 68.9   | 79.8   | 88.2   | 0.016125266 | 49.25   | 74.5    | 25.25  | 0.661073826 | 0.01199  | 1.514  |
| 161610_at   | 208.3  | 228.4  | 183.7  | 220.8  | 234.4  | 303    | 274.1  | 313.9  | 0.019270082 | 210.3   | 281.35  | 71.05  | 0.747467567 | 0.01205  | 1.334  |
| 161611_f_at | 74.3   | 88.6   | 161.9  | 148.4  | 246.8  | 121.9  | 210.6  | 147.3  | 0.131646239 | 118.3   | 181.65  | 63.35  | 0.651252408 | 0.1266   | 1.558  |
| 161612_f_at | 313.4  | 321    | 332.4  | 256    | 406.4  | 321.9  | 326.8  | 309.2  | 0.254481665 | 305.7   | 341.075 | 35.375 | 0.896283809 | 0.2491   | -1.115 |
| 161613_at   | 170.8  | 204.7  | 230.1  | 267.1  | 272.1  | 215.9  | 209.2  | 298.6  | 0.341279495 | 218.175 | 248.95  | 30.775 | 0.876380799 | 0.3382   | 1.143  |
| 161614_r_at | 158.6  | 124.7  | 139.8  | 135.1  | 235.9  | 182.6  | 151.7  | 197    | 0.050842687 | 139.55  | 191.8   | 52.25  | 0.727580813 | 0.02498  | 1.362  |
| 161615_f_at | 151.5  | 200.7  | 135.7  | 206.6  | 156.5  | 151    | 179.3  | 185.5  | 0.790019331 | 173.625 | 168.075 | 5.55   | 1.033020973 | 0.8648   | -1.021 |
| 161616_f_at | 50.5   | 42     | 15.7   | 35.6   | 26.4   | 57.3   | 41     | 68.4   | 0.338993554 | 35.95   | 48.275  | 12.325 | 0.744691869 | 0.3746   | 1.375  |
| 161617_f_at | 28.4   | 19     | 21.5   | 48.3   | 40.1   | 43     | 39.5   | 38.9   | 0.193605151 | 29.3    | 40.375  | 11.075 | 0.725696594 | 0.1108   | 1.475  |
| 161618_r_at | 102.5  | 186.6  | 184.5  | 202.8  | 64.7   | 115.3  | 67.3   | 164.6  | 0.089435599 | 169.1   | 102.975 | 66.125 | 1.642146152 | 0.09652  | -1.716 |
| 161619_f_at | 67.1   | 36.5   | 68.6   | 57.2   | 25.1   | 74.6   | 82.4   | 66.6   | 0.75747781  | 57.35   | 62.175  | 4.825  | 0.922396462 | 0.9584   | -1.017 |
| 161620_f_at | 55.2   | 52.2   | 50     | 37.9   | 51.8   | 50.6   | 37.8   | 61.6   | 0.802045529 | 48.825  | 50.45   | 1.625  | 0.967789891 | 0.8415   | -1.028 |
| 161621_r_at | 56.5   | 48.9   | 89.9   | 112.8  | 61.6   | 114    | 74.9   | 127.7  | 0.44854722  | 77.025  | 94.55   | 17.525 | 0.814648334 | 0.4343   | 1.244  |
| 161622_f_at | 0.7    | 20.5   | 2.1    | 22     | 3.3    | 19.4   | 10.7   | 18.4   | 0.821989788 | 11.325  | 12.95   | 1.625  | 0.874517375 | 0.4611   | 2.129  |
| 161623_at   | 2.2    | 2.2    | 1.9    | 13.2   | 1.7    | 18.8   | 3.1    | 6.2    | 0.61189368  | 4.875   | 7.45    | 2.575  | 0.654362416 | 0.5773   | 1.501  |
| 161624_r_at | 8.8    | 13.1   | 17.6   | 14.1   | 7.5    | 22.8   | 17.2   | 17.2   | 0.483982467 | 13.4    | 16.175  | 2.775  | 0.828438949 | 0.6243   | 1.155  |
| 161625_r_at | 28.4   | 48.7   | 39     | 20.4   | 25.9   | 33.5   | 34.3   | 21.4   | 0.478047907 | 34.125  | 28.775  | 5.35   | 1.185925282 | 0.5583   | -1.147 |
| 161626_f_at | 101.4  | 113.4  | 129.9  | 106.3  | 178.9  | 114.5  | 128.6  | 122.6  | 0.212014843 | 112.75  | 136.15  | 23.4   | 0.828130738 | 0.1666   | 1.194  |
| 161627_r_at | 192.7  | 60.8   | 63.5   | 176.9  | 127.9  | 28.4   | 119    | 96.4   | 0.499963795 | 123.475 | 92.925  | 30.55  | 1.328759752 | 0.565    | -1.333 |
| 161628_r_at | 11.1   | 9.7    | 12.2   | 9.2    | 11     | 8.1    | 11.5   | 10.5   | 0.795726759 | 10.55   | 10.275  | 0.275  | 1.02676399  | 0.7755   | -1.03  |
| 161629_i_at | 34.3   | 8.7    | 18.1   | 21.1   | 9.3    | 30.2   | 3.6    | 32.1   | 0.852209795 | 20.55   | 18.8    | 1.75   | 1.093085106 | 0.6163   | -1.37  |
| 161630_i_at | 17.9   | 32.7   | 53.1   | 40.3   | 2      | 37.5   | 30.2   | 43.8   | 0.54305101  | 36      | 28.375  | 7.625  | 1.268722467 | 0.4407   | -1.878 |
| 161631_f_at | 306    | 292.7  | 334.6  | 265.8  | 296.7  | 243.3  | 249.6  | 325.5  | 0.423145525 | 299.775 | 278.775 | 21     | 1.075329567 | 0.4      | -1.08  |
| 161632_r_at | 455.5  | 372.7  | 539.8  | 489.9  | 636.9  | 479.8  | 460.2  | 323.7  | 0.8900472   | 464.475 | 475.15  | 10.675 | 0.977533411 | 0.9837   | -1.003 |
| 161633_r_at | 227.8  | 238.7  | 230.1  | 266.7  | 331.9  | 222.7  | 370.1  | 282.7  | 0.149923931 | 240.825 | 301.85  | 61.025 | 0.797830048 | 0.1201   | 1.234  |
| 161634_r_at | 5.4    | 3.7    | 5.5    | 3.9    | 13.9   | 5.8    | 9.1    | 5.3    | 0.141793746 | 4.625   | 8.525   | 3.9    | 0.542521994 | 0.06623  | 1.739  |
| 161635_f_at | 49.8   | 36.4   | 28.2   | 37.9   | 28.1   | 34.3   | 18.6   | 34.5   | 0.165895426 | 38.075  | 28.875  | 9.2    | 1.318614719 | 0.1758   | -1.33  |
| 161636_r_at | 2050.1 | 2289.1 | 2617.4 | 2906.8 | 3676.6 | 2031   | 3656.3 | 3094.7 | 0.199195862 | 2465.85 | 3114.65 | 648.8  | 0.791694091 | 0.2242   | 1.24   |
| 161637_f_at | 24.5   | 12.1   | 11.3   | 3.8    | 36.2   | 21.4   | 41.9   | 41.7   | 0.013602716 | 12.925  | 35.3    | 22.375 | 0.366147309 | 0.03107  | 3.221  |
| 161638_f_at | 117.9  | 113.7  | 130.7  | 147.6  | 233.8  | 170.4  | 174.3  | 203.9  | 0.011705524 | 127.475 | 195.6   | 68.125 | 0.651712679 | 0.004083 | 1.529  |
| 161639_f_at | 47.4   | 34.9   | 48.2   | 86.8   | 70.5   | 55.9   | 61.1   | 57.2   | 0.59432671  | 54.325  | 61.175  | 6.85   | 0.888026154 | 0.4173   | 1.188  |
| 161640_at   | 27.6   | 65.2   | 40.9   | 75.8   | 143.5  | 95.6   | 55.2   | 86     | 0.102963771 | 52.375  | 95.075  | 42.7   | 0.550880884 | 0.08849  | 1.848  |
| 161641_at   | 153.8  | 155.5  | 119.8  | 146.4  | 67.6   | 117.8  | 162.2  | 164.9  | 0.554697923 | 143.875 | 128.125 | 15.75  | 1.122926829 | 0.4646   | -1.185 |
| 161642_f_at | 1.7    | 3      | 3.2    | 1.6    | 3.1    | 1.5    | 3.7    | 2.7    | 0.571852652 | 2.375   | 2.75    | 0.375  | 0.863636364 | 0.605    | 1.16   |
| 161643_i_at | 14.1   | 21.9   | 24.6   | 0.9    | 36.5   | 22.2   | 32.7   | 8.6    | 0.2861272   | 15.375  | 25      | 9.625  | 0.615       | 0.3393   | 2.41   |
| 161644_f_at | 1041   | 834.7  | 1053.7 | 946.2  | 1148.3 | 894.2  | 1098.9 | 919.4  | 0.59098325  | 968.9   | 1015.2  | 46.3   | 0.954393223 | 0.6056   | -1.046 |
| 161645_r_at | 5.6    | 5.8    | 6.1    | 5.7    | 6.8    | 5.7    | 6.1    | 6.2    | 0.182376324 | 5.8     | 6.2     | 0.4    | 0.935483871 | 0.1758   | -1.067 |
| 161646_r_at | 0.8    | 0.9    | 1.1    | 6.1    | 9.4    | 3.5    | 5.8    | 3.4    | 0.135107799 | 2.225   | 5.525   | 3.3    | 0.402714932 | 0.06152  | 3.439  |
| 161647_f_at | 6.1    | 24.3   | 13.1   | 8.6    | 12     | 4.6    | 15.4   | 18.5   | 0.939220513 | 13.025  | 12.625  | 0.4    | 1.031683168 | 0.9762   | -1.013 |
| 161648_at   | 550    | 488.7  | 428.5  | 468.6  | 669.4  | 522.5  | 573.8  | 470.4  | 0.190251689 | 483.95  | 559.025 | 75.075 | 0.865703681 | 0.1757   | 1.15   |
| 161649_f_at | 3.9    | 3.1    | 4      | 3.2    | 5.2    | 3.1    | 4.9    | 4.3    | 0.180681387 | 3.55    | 4.375   | 0.825  | 0.811428571 | 0.1974   | 1.214  |
| 161650_at   | 441.1  | 386.8  | 441.4  | 468    | 453.8  | 319.2  | 435.3  | 503.4  | 0.887549871 | 434.325 | 427.925 | 6.4    | 1.014955892 | 0.8133   | -1.026 |
| 161651_f_at | 23.3   | 16     | 16.9   | 33.9   | 17.2   | 18.1   | 34.9   | 24.8   | 0.839868915 | 22.525  | 23.75   | 1.225  | 0.948421053 | 0.8188   | -1.059 |
| 161652_r_at | 8.8    | 6.9    | 0.6    | 1.6    | 6.6    | 7.9    | 8.2    | 0.4    | 0.648017445 | 4.475   | 5.775   | 1.3    | 0.774891775 | 0.8005   | 1.303  |
| 161653_f_at | 12.8   | 20.1   | 18.5   | 30.9   | 12.1   | 8.2    | 12.4   | 25.1   | 0.289649477 | 20.575  | 14.45   | 6.125  | 1.423875433 | 0.2355   | -1.475 |
| 161654_r_at | 56.5   | 108.5  | 26.2   | 13.4   | 6.3    | 19.5   | 32.7   | 102.7  | 0.731243115 | 51.15   | 40.3    | 10.85  | 1.269230769 | 0.5942   | -1.514 |
| 161655_at   | 152    | 129.3  | 173.4  | 87.1   | 146.6  | 133.9  | 145.8  | 118.3  | 0.973341911 | 135.45  | 136.15  | 0.7    | 0.994858612 | 0.8423   | -1.033 |
| 161656_r_at | 85     | 105.3  | 58.3   | 123.4  | 98.5   | 84.8   | 137.2  | 61.2   | 0.912635565 | 93      | 95.425  | 2.425  | 0.974587372 | 0.9306   | -1.021 |
| 161657_f_at | 4620.1 | 3729.6 | 3767.8 | 3907.9 | 8233.6 | 3984.9 | 4751.7 | 4450.8 | 0.260885987 | 4006.35 | 5355.25 | 1348.9 | 0.748116334 | 0.1876   | 1.286  |
| 161658_at   | 118.5  | 103.2  | 106.4  | 150.7  | 29.8   | 104.8  | 88.2   | 94.4   | 0.09853868  | 119.7   | 79.3    | 40.4   | 1.509457755 | 0.1498   | -1.658 |
| 161659_f_at | 26.5   | 41.5   | 38.8   | 47.7   | 59.4   | 37.9   | 19.5   | 37.4   | 0.993898215 | 38.625  | 38.55   | 0.075  | 1.001945525 | 0.8432   | -1.055 |
| 161660_r_at | 13     | 30.9   | 14.5   | 22.1   | 42.7   | 18     | 19.6   | 15.3   | 0.637498968 | 20.125  | 23.9    | 3.775  | 0.842050209 | 0.6491   | 1.156  |
| 161661_i_at | 1.2    | 1.3    | 1.7    | 1.4    | 2.7    | 5.7    | 2      | 1.9    | 0.156843051 | 1.4     | 3.075   | 1.675  | 0.455284553 | 0.04513  | 1.96   |
| 161662_f_at | 68.5   | 9.9    | 26.2   | 53     | 68.1   | 56.1   | 57.5   | 51.2   | 0.250118752 | 39.4    | 58.225  | 18.825 | 0.676685273 | 0.2059   | 1.86   |
| 161663_f_at | 63.7   | 36     | 121.7  | 74.2   | 165.8  | 68.2   | 153.2  | 135.4  | 0.091958787 | 73.9    | 130.65  | 56.75  | 0.565633372 | 0.109    | 1.835  |



|             |        |       |       |       |       |       |        |       |             |         |         |         |             |          |        |
|-------------|--------|-------|-------|-------|-------|-------|--------|-------|-------------|---------|---------|---------|-------------|----------|--------|
| 161664_at   | 20.5   | 7.7   | 20.3  | 36.1  | 30.2  | 24.1  | 34.3   | 14.8  | 0.539940827 | 21.15   | 25.85   | 4.7     | 0.818181818 | 0.4635   | 1.336  |
| 161665_at   | 21.4   | 18.7  | 25.8  | 13.1  | 31.6  | 18.6  | 12     | 28.4  | 0.603448983 | 19.75   | 22.65   | 2.9     | 0.87196468  | 0.7272   | 1.101  |
| 161666_f_at | 112.2  | 173.1 | 128.5 | 99    | 181.8 | 84.5  | 108.6  | 152.3 | 0.89906246  | 128.2   | 131.8   | 3.6     | 0.972685888 | 0.9748   | -1.007 |
| 161667_r_at | 38.1   | 26.2  | 34.4  | 9.8   | 43.2  | 14.2  | 21.6   | 18.2  | 0.764951117 | 27.125  | 24.3    | 2.825   | 1.116255144 | 0.8391   | -1.086 |
| 161668_f_at | 37.7   | 25.8  | 83.7  | 24.2  | 97    | 25    | 36.4   | 42.7  | 0.738632524 | 42.85   | 50.275  | 7.425   | 0.852312282 | 0.7029   | 1.175  |
| 161669_r_at | 0.9    | 0.9   | 1     | 0.4   | 1.7   | 0.5   | 1.5    | 0.5   | 0.511427461 | 0.8     | 1.05    | 0.25    | 0.761904762 | 0.682    | 1.185  |
| 161670_f_at | 71.1   | 21.4  | 25.2  | 22.1  | 66.2  | 45.6  | 16.8   | 29.5  | 0.78616233  | 34.95   | 39.525  | 4.575   | 0.884250474 | 0.7401   | 1.153  |
| 161671_at   | 134.7  | 88.4  | 115.4 | 82.5  | 84.4  | 103.2 | 131.6  | 121.6 | 0.767820931 | 105.25  | 110.2   | 4.95    | 0.95508167  | 0.746    | -1.053 |
| 161672_at   | 5.9    | 4.4   | 2.8   | 2.7   | 2     | 2.7   | 2      | 1.5   | 0.082248553 | 3.95    | 2.05    | 1.9     | 1.926829268 | 0.03281  | -1.862 |
| 161673_r_at | 15.8   | 11.3  | 7.8   | 10    | 27.8  | 11.6  | 7.6    | 6     | 0.721890889 | 11.225  | 13.25   | 2.025   | 0.847169811 | 0.9691   | -1.015 |
| 161674_i_at | 31.4   | 60.8  | 36.7  | 66.9  | 6.9   | 34.1  | 20     | 47.2  | 0.126708254 | 48.95   | 27.05   | 21.9    | 1.80961183  | 0.1485   | -2.14  |
| 161675_f_at | 122.8  | 36.6  | 178.5 | 183.6 | 116.9 | 188.6 | 42.6   | 30.9  | 0.503680847 | 130.375 | 94.75   | 35.625  | 1.375989446 | 0.5021   | -1.5   |
| 161676_at   | 53.2   | 37.7  | 13    | 19.2  | 42    | 22.3  | 38     | 49.4  | 0.536110428 | 30.775  | 37.925  | 7.15    | 0.811470007 | 0.4206   | 1.369  |
| 161677_r_at | 36     | 47.9  | 51.7  | 51.5  | 61.1  | 51.6  | 49.4   | 52.7  | 0.180469988 | 46.775  | 53.7    | 6.925   | 0.871042831 | 0.1852   | 1.157  |
| 161678_at   | 146    | 113.5 | 160   | 188.5 | 165.1 | 167.5 | 159    | 113.3 | 0.97060943  | 152     | 151.225 | 0.775   | 1.005124814 | 0.9957   | -1.001 |
| 161679_r_at | 2      | 1.3   | 8.1   | 1     | 2.4   | 7.7   | 2.3    | 4.6   | 0.605782495 | 3.1     | 4.25    | 1.15    | 0.729411765 | 0.3618   | 1.706  |
| 161680_r_at | 100.3  | 84    | 107.9 | 91.1  | 99.7  | 197.2 | 227.4  | 224.5 | 0.053242907 | 95.825  | 187.2   | 91.375  | 0.511885684 | 0.02204  | 1.866  |
| 161681_i_at | 91.7   | 81.2  | 88.8  | 106.2 | 142.7 | 76.8  | 79.5   | 106.9 | 0.591580371 | 91.975  | 101.475 | 9.5     | 0.906380882 | 0.6659   | -1.073 |
| 161682_f_at | 270    | 357.6 | 269.2 | 325   | 346.6 | 378.2 | 290.8  | 388.2 | 0.191011727 | 305.45  | 350.95  | 45.5    | 0.870351902 | 0.1951   | 1.15   |
| 161683_r_at | 462.8  | 514.4 | 494.8 | 601.7 | 497   | 568.8 | 481.3  | 645.2 | 0.559832781 | 518.425 | 548.075 | 29.65   | 0.945901565 | 0.5629   | -1.055 |
| 161684_r_at | 113.9  | 101.1 | 144.6 | 110.5 | 176.2 | 93.7  | 166.3  | 125.2 | 0.338754988 | 117.525 | 140.35  | 22.825  | 0.837370859 | 0.378    | 1.169  |
| 161685_r_at | 13     | 13.4  | 27.1  | 20.9  | 4.6   | 18.8  | 16.6   | 16.6  | 0.37670431  | 18.6    | 14.15   | 4.45    | 1.314487633 | 0.3819   | -1.425 |
| 161686_i_at | 1.2    | 2.6   | 6.4   | 1.1   | 1.3   | 1.1   | 10.4   | 1.5   | 0.78481843  | 2.825   | 3.575   | 0.75    | 0.79020979  | 0.9752   | -1.022 |
| 161687_r_at | 73.2   | 56.1  | 35.3  | 103.7 | 86.6  | 64.8  | 22.7   | 121.9 | 0.794513006 | 67.075  | 74      | 6.925   | 0.906418919 | 0.9862   | -1.008 |
| 161688_r_at | 278.4  | 355   | 424.3 | 446   | 481   | 330.4 | 471.2  | 472.1 | 0.275962253 | 375.925 | 438.675 | 62.75   | 0.856955605 | 0.299    | 1.172  |
| 161689_f_at | 125.7  | 110.7 | 104.1 | 125.1 | 123.8 | 113.1 | 106.1  | 219.2 | 0.432517731 | 116.4   | 140.55  | 24.15   | 0.828175027 | 0.429    | 1.158  |
| 161690_at   | 1.7    | 1.3   | 1.4   | 1.9   | 14.9  | 1.6   | 1.6    | 2.1   | 0.36794375  | 1.575   | 5.05    | 3.475   | 0.311881188 | 0.2874   | 1.894  |
| 161691_at   | 10.9   | 13.5  | 29    | 10.2  | 74.2  | 9.2   | 16.2   | 8.3   | 0.542911689 | 15.9    | 26.975  | 11.075  | 0.589434662 | 0.7513   | 1.204  |
| 161692_r_at | 2.7    | 12.3  | 8.1   | 1.2   | 16    | 3.3   | 2      | 9.6   | 0.702453168 | 6.075   | 7.725   | 1.65    | 0.786407767 | 0.6949   | 1.344  |
| 161693_r_at | 27     | 24.1  | 34.7  | 30    | 69    | 19.3  | 33     | 32    | 0.449229746 | 28.95   | 38.325  | 9.375   | 0.755381605 | 0.5302   | 1.2    |
| 161694_f_at | 37.2   | 38.3  | 26.8  | 20    | 25.7  | 5     | 10.1   | 55.6  | 0.624537197 | 30.575  | 24.1    | 6.475   | 1.268672199 | 0.3247   | -1.8   |
| 161695_f_at | 94.1   | 110.7 | 153.2 | 121.2 | 102.8 | 65.1  | 88.4   | 127.6 | 0.235543083 | 119.8   | 95.975  | 23.825  | 1.24824173  | 0.2259   | -1.265 |
| 161696_f_at | 28     | 71.6  | 31.8  | 52.4  | 65.9  | 56.5  | 55.7   | 37    | 0.535995873 | 45.95   | 53.775  | 7.825   | 0.854486285 | 0.4406   | 1.23   |
| 161697_r_at | 18.4   | 26.6  | 56.7  | 6.4   | 43.8  | 9.3   | 31.6   | 67.3  | 0.522947006 | 27.025  | 38      | 10.975  | 0.711184211 | 0.55     | 1.483  |
| 161698_f_at | 202.8  | 572   | 326.4 | 395.3 | 655.2 | 444.8 | 493.6  | 364.2 | 0.288135607 | 374.125 | 489.45  | 115.325 | 0.764378384 | 0.2536   | 1.368  |
| 161699_i_at | 34.1   | 39.5  | 17.1  | 9.5   | 10.9  | 38.8  | 21.3   | 27    | 0.95401959  | 25.05   | 24.5    | 0.55    | 1.02244898  | 0.9515   | -1.027 |
| 161700_i_at | 0.8    | 1.3   | 1.9   | 2.1   | 1.5   | 1.5   | 1.3    | 0.7   | 0.467973496 | 1.525   | 1.25    | 0.275   | 1.22        | 0.4651   | -1.234 |
| 161701_at   | 62     | 86.5  | 58.9  | 99.4  | 62.9  | 42.1  | 51     | 96.2  | 0.409279499 | 76.7    | 63.05   | 13.65   | 1.216494845 | 0.3522   | -1.246 |
| 161702_f_at | 52.3   | 59.4  | 62.2  | 68.4  | 109.5 | 74.9  | 39.9   | 76.1  | 0.386425946 | 60.575  | 75.1    | 14.525  | 0.806591212 | 0.4925   | 1.172  |
| 161703_f_at | 1076.1 | 518.2 | 742.7 | 716.6 | 948.4 | 714.5 | 1049.9 | 804.7 | 0.436807431 | 763.4   | 879.375 | 115.975 | 0.86811656  | 0.3769   | 1.178  |
| 161704_r_at | 1.1    | 2.9   | 1.2   | 1.3   | 1.7   | 1.3   | 1.8    | 3.2   | 0.551745581 | 1.625   | 2       | 0.375   | 0.8125      | 0.4659   | 1.25   |
| 161705_r_at | 17.5   | 27.8  | 7.7   | 35.5  | 13.8  | 20.1  | 16     | 16.6  | 0.435170628 | 22.125  | 16.625  | 5.5     | 1.330827068 | 0.6855   | -1.158 |
| 161706_f_at | 407.1  | 540.1 | 552.4 | 590   | 511.3 | 525.7 | 574.3  | 463   | 0.937074201 | 522.4   | 518.575 | 3.825   | 1.007375982 | 0.9945   | -1.001 |
| 161707_f_at | 99.4   | 71    | 70.6  | 91.5  | 76.5  | 62.5  | 82.1   | 77.7  | 0.365604445 | 83.125  | 74.7    | 8.425   | 1.112784471 | 0.3811   | -1.106 |
| 161708_f_at | 60.3   | 91.5  | 78.2  | 94.8  | 80.8  | 69.6  | 101.6  | 86.2  | 0.755839852 | 81.2    | 84.55   | 3.35    | 0.960378474 | 0.7296   | -1.048 |
| 161709_at   | 50     | 58.8  | 28.6  | 55.8  | 27.3  | 40.9  | 47.3   | 50    | 0.448421201 | 48.3    | 41.375  | 6.925   | 1.167371601 | 0.526    | -1.155 |
| 161710_r_at | 16     | 12.2  | 9.4   | 15.8  | 16.4  | 10.4  | 6.3    | 13.3  | 0.538265146 | 13.35   | 11.6    | 1.75    | 1.150862069 | 0.4872   | -1.196 |
| 161711_f_at | 15.8   | 5.1   | 5.2   | 1.4   | 9.5   | 3.2   | 11.8   | 6.6   | 0.813620516 | 6.875   | 7.775   | 0.9     | 0.884244373 | 0.558    | 1.431  |
| 161712_r_at | 281.8  | 210.1 | 340.6 | 288.5 | 357.4 | 239.2 | 306.1  | 274.9 | 0.713216805 | 280.25  | 294.4   | 14.15   | 0.951936141 | 0.7009   | -1.054 |
| 161713_f_at | 23.6   | 30.2  | 47.6  | 29.9  | 18.6  | 37.5  | 30.1   | 26.6  | 0.503930246 | 32.825  | 28.2    | 4.625   | 1.164007092 | 0.4996   | -1.161 |
| 161714_f_at | 7.5    | 1.9   | 11.8  | 1.2   | 7.3   | 6.2   | 11.6   | 1.5   | 0.757963174 | 5.6     | 6.65    | 1.05    | 0.842105263 | 0.6538   | 1.394  |
| 161715_f_at | 272    | 306.1 | 286.6 | 239.2 | 305.3 | 298.1 | 303.2  | 368.9 | 0.099165287 | 275.975 | 318.875 | 42.9    | 0.865464524 | 0.09286  | 1.156  |
| 161716_at   | 46.2   | 39.1  | 32.1  | 44.8  | 24    | 29.8  | 21.3   | 28.2  | 0.011380861 | 40.55   | 25.825  | 14.725  | 1.57018393  | 0.007191 | -1.568 |
| 161717_i_at | 55.8   | 51.6  | 57.2  | 42.1  | 8.4   | 60.9  | 14.5   | 14.6  | 0.109690718 | 51.675  | 24.6    | 27.075  | 2.100609756 | 0.05179  | -2.832 |
| 161718_at   | 6.3    | 17    | 10.7  | 15.1  | 25.2  | 39.3  | 6.4    | 34.9  | 0.145999235 | 12.275  | 26.45   | 14.175  | 0.464083176 | 0.2267   | 1.892  |
| 161719_f_at | 373.2  | 436.6 | 459.7 | 513.5 | 462.4 | 445   | 441    | 570.1 | 0.45216444  | 445.75  | 479.625 | 33.875  | 0.929371905 | 0.4402   | -1.077 |



|             |       |       |       |       |       |       |       |       |             |         |         |         |             |         |        |
|-------------|-------|-------|-------|-------|-------|-------|-------|-------|-------------|---------|---------|---------|-------------|---------|--------|
| 161720_r_at | 1.8   | 1.7   | 2.9   | 13.3  | 16    | 0.8   | 6.8   | 39.5  | 0.298268911 | 4.925   | 15.775  | 10.85   | 0.312202853 | 0.4169  | 2.313  |
| 161721_f_at | 38.4  | 48.3  | 17.4  | 69.8  | 28.3  | 52.1  | 25.1  | 52.7  | 0.777334904 | 43.475  | 39.55   | 3.925   | 1.099241466 | 0.9236  | -1.036 |
| 161722_f_at | 61.7  | 46.4  | 50.4  | 100.1 | 62.3  | 79.3  | 86.3  | 58.3  | 0.643702233 | 64.65   | 71.55   | 6.9     | 0.903563941 | 0.5138  | 1.146  |
| 161723_at   | 89.7  | 111.7 | 85    | 74.4  | 99.7  | 96.6  | 73.5  | 121.5 | 0.567418312 | 90.2    | 97.825  | 7.625   | 0.922054689 | 0.5865  | -1.08  |
| 161724_r_at | 2.2   | 13.4  | 2.6   | 13.3  | 11.4  | 9.8   | 7.4   | 0.8   | 0.89845343  | 7.875   | 7.35    | 0.525   | 1.071428571 | 0.8921  | -1.12  |
| 161725_r_at | 14.2  | 30.9  | 14.3  | 13.4  | 34    | 19.2  | 11.2  | 14.7  | 0.818657382 | 18.2    | 19.775  | 1.575   | 0.920353982 | 0.8499  | -1.063 |
| 161726_f_at | 162.2 | 184.8 | 171.3 | 220.1 | 148.4 | 199.1 | 161.5 | 230.6 | 0.989878054 | 184.6   | 184.9   | 0.3     | 0.998377501 | 0.9586  | -1.007 |
| 161727_r_at | 3     | 2.8   | 3     | 2     | 6.9   | 1.3   | 1     | 3.3   | 0.776948719 | 2.7     | 3.125   | 0.425   | 0.864       | 0.7595  | -1.158 |
| 161728_f_at | 1.4   | 15.6  | 21.1  | 1.9   | 1.7   | 2.2   | 1.3   | 3     | 0.206632799 | 10      | 2.05    | 7.95    | 4.87804878  | 0.2168  | -2.736 |
| 161729_f_at | 119.7 | 149.8 | 176.7 | 138.9 | 84.6  | 139.3 | 156.2 | 111.3 | 0.283487012 | 146.275 | 122.85  | 23.425  | 1.190679691 | 0.2701  | -1.211 |
| 161730_f_at | 5.7   | 7.3   | 10.4  | 8.7   | 6.1   | 8.7   | 6.8   | 2.7   | 0.271579436 | 8.025   | 6.075   | 1.95    | 1.320987654 | 0.2793  | -1.402 |
| 161731_at   | 5.3   | 6.1   | 4.7   | 4.5   | 4.8   | 6.6   | 5.3   | 8.1   | 0.264979033 | 5.15    | 6.2     | 1.05    | 0.830645161 | 0.2649  | 1.182  |
| 161732_at   | 1.2   | 2.4   | 2.4   | 7     | 8.2   | 4     | 1.9   | 2.1   | 0.695255367 | 3.25    | 4.05    | 0.8     | 0.802469136 | 0.6408  | 1.275  |
| 161733_at   | 0.9   | 10.1  | 6.3   | 5.5   | 10.6  | 4.5   | 6.8   | 4.5   | 0.718607284 | 5.7     | 6.6     | 0.9     | 0.863636364 | 0.531   | 1.454  |
| 161734_r_at | 142   | 140.2 | 230.6 | 162.5 | 172.7 | 126.6 | 75.5  | 223.7 | 0.63497274  | 168.825 | 149.625 | 19.2    | 1.128320802 | 0.5256  | -1.192 |
| 161735_r_at | 65.8  | 137.2 | 51.1  | 122.2 | 15.2  | 71    | 51.5  | 111.3 | 0.314999828 | 94.075  | 62.25   | 31.825  | 1.51124498  | 0.3018  | -1.737 |
| 161736_r_at | 20.4  | 9.4   | 31.4  | 30.1  | 7.2   | 39    | 5.7   | 3.7   | 0.405791933 | 22.825  | 13.9    | 8.925   | 1.642086331 | 0.1957  | -2.347 |
| 161737_at   | 229.8 | 180.2 | 285.6 | 216.7 | 284.4 | 188.2 | 274.3 | 245   | 0.541288061 | 228.075 | 247.975 | 19.9    | 0.919749975 | 0.5477  | -1.088 |
| 161738_f_at | 174.5 | 112.5 | 157.3 | 231   | 125   | 170.5 | 185.6 | 161.5 | 0.780758665 | 168.825 | 160.65  | 8.175   | 1.050887021 | 0.8763  | -1.028 |
| 161739_r_at | 38.8  | 117.6 | 227   | 17.6  | 39.5  | 33.6  | 167.4 | 64    | 0.687666412 | 100.25  | 76.125  | 24.125  | 1.316912972 | 0.9295  | -1.064 |
| 161740_r_at | 30    | 156.5 | 154.9 | 92.1  | 60    | 42.5  | 63.9  | 110.4 | 0.301815202 | 108.375 | 69.2    | 39.175  | 1.566112717 | 0.4786  | -1.389 |
| 161741_r_at | 17    | 23.5  | 6.9   | 19.6  | 36.3  | 18.4  | 43.7  | 18.5  | 0.152926391 | 16.75   | 29.225  | 12.475  | 0.573139435 | 0.1566  | 1.758  |
| 161742_r_at | 3.6   | 28    | 20.6  | 34.7  | 9.6   | 24.8  | 12    | 11.7  | 0.387876326 | 21.725  | 14.525  | 7.2     | 1.495697074 | 0.74    | -1.213 |
| 161743_i_at | 7.6   | 13.1  | 12.6  | 9     | 36.6  | 6.2   | 40    | 8.8   | 0.262173449 | 10.575  | 22.9    | 12.325  | 0.461790393 | 0.3687  | 1.625  |
| 161744_f_at | 12.4  | 1.3   | 0.8   | 1.7   | 2.1   | 2.5   | 3.1   | 0.8   | 0.54279118  | 4.05    | 2.125   | 1.925   | 1.905882353 | 0.8463  | -1.147 |
| 161745_f_at | 240.1 | 221.1 | 245.4 | 231.5 | 226.2 | 226.1 | 246.5 | 257.1 | 0.653584162 | 234.525 | 238.975 | 4.45    | 0.981378805 | 0.6654  | -1.018 |
| 161746_i_at | 0.6   | 0.6   | 1.5   | 0.7   | 2     | 0.8   | 1.1   | 0.9   | 0.357770456 | 0.85    | 1.2     | 0.35    | 0.708333333 | 0.3265  | 1.384  |
| 161747_i_at | 98.3  | 124.9 | 70.1  | 91.3  | 138.5 | 92.5  | 94.2  | 89.9  | 0.654564393 | 96.15   | 103.775 | 7.625   | 0.926523729 | 0.6273  | -1.083 |
| 161748_r_at | 10.9  | 8.3   | 19    | 21.2  | 17.8  | 16.5  | 8.9   | 15.8  | 0.979428297 | 14.85   | 14.75   | 0.1     | 1.006779661 | 0.9226  | -1.028 |
| 161749_r_at | 181.3 | 103.6 | 184.1 | 152.2 | 89.6  | 152.7 | 115.4 | 105.2 | 0.141147625 | 155.3   | 115.725 | 39.575  | 1.341974509 | 0.149   | -1.335 |
| 161750_f_at | 102.9 | 91.8  | 84.4  | 154   | 65    | 125.3 | 108.3 | 179.2 | 0.70917925  | 108.275 | 119.45  | 11.175  | 0.906446212 | 0.8085  | -1.065 |
| 161751_f_at | 116.8 | 116.6 | 92.2  | 49    | 79    | 112.8 | 134.6 | 105   | 0.499967684 | 93.65   | 107.85  | 14.2    | 0.868335651 | 0.4709  | 1.196  |
| 161752_r_at | 20.8  | 51.8  | 35.9  | 42.1  | 43.8  | 19.7  | 22.3  | 33.2  | 0.390917963 | 37.65   | 29.75   | 7.9     | 1.265546218 | 0.4156  | -1.264 |
| 161753_f_at | 10.6  | 27.7  | 52.6  | 12.8  | 14    | 31.4  | 11.5  | 26    | 0.652629549 | 25.925  | 20.725  | 5.2     | 1.250904704 | 0.8234  | -1.108 |
| 161754_f_at | 134.1 | 138.5 | 166.4 | 145.6 | 135.7 | 146.9 | 242.5 | 124.6 | 0.597300281 | 146.15  | 162.425 | 16.275  | 0.899799908 | 0.6581  | -1.076 |
| 161755_at   | 15.3  | 30.8  | 17.5  | 68.6  | 78.9  | 17.9  | 16.4  | 14.8  | 0.959770861 | 33.05   | 32      | 1.05    | 1.0328125   | 0.8186  | -1.133 |
| 161756_at   | 95.7  | 126.6 | 147.7 | 199.8 | 162.6 | 186.2 | 227   | 122.3 | 0.340340705 | 142.45  | 174.525 | 32.075  | 0.816215442 | 0.3281  | 1.239  |
| 161757_f_at | 337.6 | 354.7 | 334.4 | 335.4 | 302.4 | 446.9 | 324.7 | 325.3 | 0.796542367 | 340.525 | 349.825 | 9.3     | 0.973415279 | 0.8694  | -1.015 |
| 161758_r_at | 276.6 | 181.8 | 446   | 145.2 | 818   | 372.1 | 521.6 | 347.2 | 0.1042089   | 262.4   | 514.725 | 252.325 | 0.509786779 | 0.06613 | 2.028  |
| 161759_r_at | 37.1  | 89.2  | 75    | 64.4  | 130.1 | 69.5  | 47.9  | 48.2  | 0.751025358 | 66.425  | 73.925  | 7.5     | 0.898545823 | 0.8334  | -1.069 |
| 161760_s_at | 90.9  | 143.2 | 118.7 | 140.2 | 114.3 | 139.9 | 154.2 | 137.9 | 0.402224038 | 123.25  | 136.575 | 13.325  | 0.90243456  | 0.3927  | 1.119  |
| 161761_r_at | 20.7  | 25.6  | 36.1  | 22.7  | 32.2  | 19.3  | 52.3  | 24.4  | 0.508933344 | 26.275  | 32.05   | 5.775   | 0.819812793 | 0.5696  | 1.16   |
| 161762_at   | 4     | 4.2   | 5.5   | 7.2   | 8.9   | 4.9   | 3.8   | 3.6   | 0.960441896 | 5.225   | 5.3     | 0.075   | 0.985849057 | 0.8961  | -1.034 |
| 161763_r_at | 351.8 | 231.7 | 202   | 226.3 | 237.6 | 200.1 | 238.5 | 509.3 | 0.610194578 | 252.95  | 296.375 | 43.425  | 0.853479544 | 0.6661  | -1.116 |
| 161764_r_at | 11.2  | 2.9   | 0.6   | 1.3   | 0.4   | 2     | 13.8  | 1.1   | 0.938193733 | 4       | 4.325   | 0.325   | 0.924855491 | 0.8523  | -1.21  |
| 161765_f_at | 138.3 | 178   | 216.2 | 130.5 | 361.4 | 237.2 | 269.2 | 192.9 | 0.06223956  | 165.75  | 265.175 | 99.425  | 0.625058923 | 0.03835 | 1.591  |
| 161766_i_at | 2.7   | 3.5   | 3.8   | 12.9  | 33.9  | 18    | 28    | 3.5   | 0.103355252 | 5.725   | 20.85   | 15.125  | 0.274580336 | 0.1001  | 3.358  |
| 161767_r_at | 526.7 | 463.3 | 698.2 | 647.9 | 637.5 | 597.1 | 535   | 603.1 | 0.88255154  | 584.025 | 593.175 | 9.15    | 0.984574535 | 0.801   | -1.027 |
| 161768_r_at | 20.5  | 44.7  | 32.4  | 44.3  | 21.2  | 36.6  | 29.1  | 33.6  | 0.459164229 | 35.475  | 30.125  | 5.35    | 1.177593361 | 0.554   | -1.147 |
| 161769_r_at | 79.2  | 89.5  | 106.8 | 69.8  | 107.3 | 114.4 | 87.5  | 126.7 | 0.094286191 | 86.325  | 108.975 | 22.65   | 0.792154164 | 0.09568 | 1.267  |
| 161770_f_at | 62.1  | 112.6 | 86    | 144   | 175.5 | 141.8 | 159.5 | 145.5 | 0.045940016 | 101.175 | 155.575 | 54.4    | 0.650329423 | 0.04445 | 1.607  |
| 161771_r_at | 380.6 | 374.6 | 378.9 | 438.3 | 363.8 | 356.4 | 414.8 | 357.6 | 0.370238894 | 393.1   | 373.15  | 19.95   | 1.053463755 | 0.3554  | -1.053 |
| 161772_i_at | 168.5 | 170.5 | 192.9 | 148.2 | 97.1  | 156.8 | 148.6 | 216.3 | 0.589597806 | 170.025 | 154.7   | 15.325  | 1.099062702 | 0.4822  | -1.138 |
| 161773_i_at | 57    | 12.4  | 13.8  | 16.9  | 10.5  | 8.6   | 28    | 19.1  | 0.505012604 | 25.025  | 16.55   | 8.475   | 1.512084592 | 0.5154  | -1.36  |
| 161774_f_at | 468.2 | 457.5 | 412.1 | 454.2 | 526.5 | 444.3 | 403   | 478.8 | 0.626752079 | 448     | 463.15  | 15.15   | 0.967289215 | 0.6553  | -1.03  |
| 161775_f_at | 8.3   | 5.2   | 33    | 5.5   | 22.2  | 6.2   | 6.4   | 5.1   | 0.715947172 | 13      | 9.975   | 3.025   | 1.303258145 | 0.8118  | -1.146 |



|             |       |       |       |        |        |       |       |       |             |         |         |         |             |         |        |
|-------------|-------|-------|-------|--------|--------|-------|-------|-------|-------------|---------|---------|---------|-------------|---------|--------|
| 161776_at   | 80.2  | 53    | 45    | 48.3   | 43.8   | 64.8  | 61.3  | 60.1  | 0.928742924 | 56.625  | 57.5    | 0.875   | 0.984782609 | 0.8495  | -1.031 |
| 161777_f_at | 50    | 17.7  | 24.2  | 19.4   | 84.8   | 19.6  | 68.1  | 23.4  | 0.299507391 | 27.825  | 48.975  | 21.15   | 0.568147014 | 0.3315  | 1.589  |
| 161778_i_at | 82.3  | 71.6  | 56.1  | 86.8   | 84.5   | 77    | 101.8 | 64.5  | 0.483227122 | 74.2    | 81.95   | 7.75    | 0.90543014  | 0.4906  | -1.105 |
| 161779_r_at | 262.1 | 245.6 | 278.5 | 229.7  | 458.6  | 224.8 | 346.1 | 304.7 | 0.200748385 | 253.975 | 333.55  | 79.575  | 0.76143007  | 0.1651  | 1.275  |
| 161780_f_at | 2.2   | 1.9   | 2.2   | 2      | 2.8    | 2.2   | 2.7   | 2.3   | 0.055613966 | 2.075   | 2.5     | 0.425   | 0.83        | 0.03585 | 1.205  |
| 161781_at   | 48.6  | 54.2  | 75    | 37     | 66.5   | 72.2  | 78.8  | 72.2  | 0.095697578 | 53.7    | 72.425  | 18.725  | 0.741456679 | 0.0713  | 1.39   |
| 161782_r_at | 5.8   | 9     | 15    | 16.4   | 13.9   | 2.8   | 11.9  | 4.3   | 0.405436355 | 11.55   | 8.225   | 3.325   | 1.404255319 | 0.3515  | -1.591 |
| 161783_at   | 3     | 21.5  | 13.8  | 8.9    | 10.6   | 4.5   | 7.5   | 8.7   | 0.39424622  | 11.8    | 7.825   | 3.975   | 1.50798722  | 0.6285  | -1.263 |
| 161784_f_at | 149.9 | 138.5 | 162.3 | 140.1  | 132    | 158.2 | 143.7 | 132.9 | 0.492569049 | 147.7   | 141.7   | 6       | 1.042342978 | 0.4769  | -1.043 |
| 161785_f_at | 57.3  | 71.9  | 85.2  | 77.7   | 146.1  | 80.5  | 129.1 | 75.7  | 0.139559379 | 73.025  | 107.85  | 34.825  | 0.677097821 | 0.1014  | 1.433  |
| 161786_f_at | 701.2 | 678.4 | 684   | 615.5  | 938.6  | 749.3 | 795.9 | 714.3 | 0.072073843 | 669.775 | 799.525 | 129.75  | 0.837716144 | 0.03974 | 1.189  |
| 161787_f_at | 296.7 | 569.3 | 349.7 | 439.6  | 435.5  | 336.5 | 386.2 | 354.1 | 0.604932821 | 413.825 | 378.075 | 35.75   | 1.094557958 | 0.6857  | -1.067 |
| 161788_f_at | 80.8  | 72.6  | 91.7  | 77.6   | 39.4   | 107   | 100.4 | 63.4  | 0.86003972  | 80.675  | 77.55   | 3.125   | 1.040296583 | 0.6573  | -1.117 |
| 161789_r_at | 24.9  | 9.1   | 26.5  | 24.1   | 41.9   | 36.7  | 7.2   | 28.2  | 0.437635709 | 21.15   | 28.5    | 7.35    | 0.742105263 | 0.7027  | 1.211  |
| 161790_at   | 10.4  | 20.5  | 14.5  | 1.5    | 4.5    | 26    | 7.8   | 8.2   | 0.987850187 | 11.725  | 11.625  | 0.1     | 1.008602151 | 0.8707  | 1.125  |
| 161791_r_at | 95.4  | 209.1 | 315.3 | 209    | 100.4  | 95.1  | 80.3  | 292.6 | 0.372262148 | 207.2   | 142.1   | 65.1    | 1.458128079 | 0.2961  | -1.556 |
| 161792_f_at | 15.6  | 14.7  | 18.6  | 21.2   | 17.4   | 11.7  | 9.2   | 18.6  | 0.273538258 | 17.525  | 14.225  | 3.3     | 1.23198594  | 0.2467  | -1.271 |
| 161793_at   | 6.9   | 12.2  | 13.9  | 9.4    | 15.1   | 13.7  | 3     | 12.1  | 0.909668288 | 10.6    | 10.975  | 0.375   | 0.965831435 | 0.8175  | -1.105 |
| 161794_i_at | 4.2   | 5.4   | 2.2   | 2.3    | 9.7    | 2.3   | 5     | 1.5   | 0.612472647 | 3.525   | 4.625   | 1.1     | 0.762162162 | 0.8554  | 1.094  |
| 161795_r_at | 8.5   | 7     | 5.2   | 12     | 7.2    | 14.3  | 23.2  | 5.7   | 0.360176359 | 8.175   | 12.6    | 4.425   | 0.648809524 | 0.4102  | 1.382  |
| 161796_r_at | 148.9 | 149.4 | 209.1 | 209.9  | 159.7  | 151.6 | 194.4 | 274.4 | 0.654353465 | 179.325 | 195.025 | 15.7    | 0.9194975   | 0.6885  | -1.073 |
| 161797_r_at | 33.4  | 36.1  | 21.6  | 23.8   | 20.6   | 36.9  | 31.1  | 59    | 0.406388975 | 28.725  | 36.9    | 8.175   | 0.778455285 | 0.4497  | 1.225  |
| 161798_r_at | 83.5  | 71.5  | 63    | 105.7  | 102.8  | 118.5 | 37.9  | 82.7  | 0.827971139 | 80.925  | 85.475  | 4.55    | 0.946768061 | 0.9722  | -1.01  |
| 161799_r_at | 155.8 | 268.9 | 299.4 | 136.3  | 407.1  | 395.4 | 286.3 | 171.7 | 0.197781608 | 215.1   | 315.125 | 100.025 | 0.682586275 | 0.2204  | 1.467  |
| 161800_r_at | 13.7  | 15.7  | 6.1   | 8.1    | 4.5    | 6.3   | 5.3   | 5     | 0.087528156 | 10.9    | 5.275   | 5.625   | 2.066350711 | 0.02883 | -1.945 |
| 161801_r_at | 1     | 14.2  | 5.2   | 7      | 34.5   | 12.9  | 8.6   | 8.8   | 0.236774273 | 6.85    | 16.2    | 9.35    | 0.422839506 | 0.1601  | 2.851  |
| 161802_i_at | 29.8  | 42.7  | 49.6  | 21.9   | 43.6   | 6.5   | 65.5  | 58.1  | 0.634510803 | 36      | 43.425  | 7.425   | 0.829015544 | 0.9185  | -1.063 |
| 161803_r_at | 8.3   | 12.9  | 33.4  | 14.5   | 13.2   | 9.6   | 14    | 12.9  | 0.448082879 | 17.275  | 12.425  | 4.85    | 1.390342052 | 0.5177  | -1.23  |
| 161804_r_at | 9.6   | 1.8   | 4.6   | 8.9    | 3      | 2.7   | 0.4   | 10.9  | 0.527944451 | 6.225   | 4.25    | 1.975   | 1.464705882 | 0.3741  | -2.099 |
| 161805_r_at | 11.8  | 13.6  | 10.3  | 20.3   | 7      | 14.3  | 22.2  | 35.3  | 0.429102677 | 14      | 19.7    | 5.7     | 0.710659898 | 0.5916  | 1.236  |
| 161806_r_at | 33.7  | 63.1  | 55.5  | 36.1   | 52     | 58.4  | 67.3  | 13.8  | 0.957474039 | 47.1    | 47.875  | 0.775   | 0.98381201  | 0.805   | -1.108 |
| 161807_i_at | 4.4   | 2.2   | 2.7   | 1.4    | 4.7    | 1.5   | 1.6   | 1.5   | 0.742457248 | 2.675   | 2.325   | 0.35    | 1.150537634 | 0.6012  | -1.227 |
| 161808_f_at | 66.7  | 178.9 | 72    | 139.6  | 140.2  | 110.9 | 107.5 | 117.4 | 0.876807539 | 114.3   | 119     | 4.7     | 0.960504202 | 0.641   | -1.131 |
| 161809_r_at | 17.3  | 18.1  | 14.4  | 17.1   | 49     | 6.3   | 23.6  | 30.6  | 0.314786991 | 16.725  | 27.375  | 10.65   | 0.610958904 | 0.5718  | 1.303  |
| 161810_r_at | 19.8  | 37.4  | 67.6  | 70.9   | 88.6   | 71.2  | 17.9  | 82.6  | 0.458261188 | 48.925  | 65.075  | 16.15   | 0.751824818 | 0.6339  | 1.274  |
| 161811_f_at | 6.5   | 7.7   | 5.9   | 13.4   | 8.6    | 5.2   | 9.8   | 6.3   | 0.673461102 | 8.375   | 7.475   | 0.9     | 1.120401338 | 0.7119  | -1.095 |
| 161812_r_at | 182.6 | 177.5 | 274.1 | 205    | 224.5  | 183.2 | 256.6 | 207.7 | 0.773358928 | 209.8   | 218     | 8.2     | 0.962385321 | 0.717   | -1.047 |
| 161813_i_at | 4.5   | 14.3  | 20.9  | 27.2   | 43.9   | 10.4  | 22.7  | 22    | 0.385733246 | 16.725  | 24.75   | 8.025   | 0.675757576 | 0.3915  | 1.58   |
| 161814_f_at | 334.7 | 276.8 | 369.1 | 324.2  | 461.2  | 386.1 | 417.8 | 347.8 | 0.047917828 | 326.2   | 403.225 | 77.025  | 0.808977618 | 0.04599 | 1.236  |
| 161815_f_at | 36.7  | 19.3  | 33    | 28.2   | 27.9   | 7     | 20    | 40.8  | 0.535181639 | 29.3    | 23.925  | 5.375   | 1.224660397 | 0.415   | -1.424 |
| 161816_r_at | 798.8 | 785.6 | 1025  | 906.3  | 1295.2 | 944.3 | 950.8 | 941.5 | 0.196471045 | 878.925 | 1032.95 | 154.025 | 0.850888233 | 0.1668  | 1.171  |
| 161817_f_at | 998.5 | 1258  | 894.6 | 1190.9 | 521.6  | 865   | 816   | 954.5 | 0.057356978 | 1085.5  | 789.275 | 296.225 | 1.375312787 | 0.07475 | -1.397 |
| 161818_f_at | 246.6 | 253.1 | 256.8 | 275.5  | 272    | 220.5 | 279   | 262.7 | 0.97146322  | 258     | 258.55  | 0.55    | 0.997872752 | 0.9845  | -1.001 |
| 161819_f_at | 194.6 | 251.8 | 263.9 | 322.2  | 352.1  | 284.9 | 278.8 | 403.3 | 0.120430125 | 258.125 | 329.775 | 71.65   | 0.78273065  | 0.1175  | 1.283  |
| 161820_f_at | 2     | 3.8   | 29.8  | 7.3    | 4.9    | 4.2   | 1.9   | 13.9  | 0.553953478 | 10.725  | 6.225   | 4.5     | 1.722891566 | 0.7083  | -1.319 |
| 161821_f_at | 40.1  | 14.3  | 43.5  | 43.1   | 10.6   | 29.6  | 63.8  | 14.4  | 0.70393917  | 35.25   | 29.6    | 5.65    | 1.190878378 | 0.5208  | -1.392 |
| 161822_at   | 2.5   | 7.8   | 7.6   | 10.4   | 2.6    | 2.3   | 3.1   | 14.3  | 0.673940161 | 7.075   | 5.575   | 1.5     | 1.269058296 | 0.436   | -1.559 |
| 161823_r_at | 248.6 | 215.2 | 212.2 | 238.1  | 257.5  | 185.2 | 299.1 | 318.1 | 0.309333869 | 228.525 | 264.975 | 36.45   | 0.862439853 | 0.3469  | 1.138  |
| 161824_r_at | 154.8 | 58.2  | 81    | 62     | 136.3  | 99.7  | 135.4 | 165.5 | 0.146229174 | 89      | 134.225 | 45.225  | 0.663065748 | 0.1017  | 1.61   |
| 161825_f_at | 10.4  | 4.9   | 4.9   | 2.5    | 6.4    | 2.4   | 2.8   | 2.6   | 0.322514176 | 5.675   | 3.55    | 2.125   | 1.598591549 | 0.279   | -1.547 |
| 161826_r_at | 614.3 | 557.4 | 580.1 | 580.4  | 502.4  | 585   | 492   | 723.8 | 0.902453699 | 583.05  | 575.8   | 7.25    | 1.012591177 | 0.7999  | -1.025 |
| 161827_f_at | 42.1  | 34.8  | 26.6  | 30.9   | 40     | 23.4  | 23.6  | 56.5  | 0.803452141 | 33.6    | 35.875  | 2.275   | 0.936585366 | 0.9675  | -1.01  |
| 161828_r_at | 4.3   | 4.4   | 16.9  | 7      | 29.1   | 7.6   | 15.6  | 23.6  | 0.108353671 | 8.15    | 18.975  | 10.825  | 0.429512516 | 0.0846  | 2.459  |
| 161829_at   | 12.4  | 10.4  | 7.4   | 8.2    | 16.8   | 9.5   | 17.4  | 12    | 0.109896338 | 9.6     | 13.925  | 4.325   | 0.68940754  | 0.1014  | 1.435  |
| 161830_f_at | 12.4  | 40.7  | 34.9  | 16.6   | 8.6    | 5.8   | 14.1  | 26.9  | 0.196422895 | 26.15   | 13.85   | 12.3    | 1.888086643 | 0.1706  | -1.978 |
| 161831_at   | 65.3  | 42.9  | 67.9  | 71.8   | 34.3   | 78.5  | 65.7  | 50.5  | 0.6986078   | 61.975  | 57.25   | 4.725   | 1.082532751 | 0.6386  | -1.112 |



|             |        |        |        |        |        |        |        |        |             |         |         |        |             |         |        |
|-------------|--------|--------|--------|--------|--------|--------|--------|--------|-------------|---------|---------|--------|-------------|---------|--------|
| 161832_r_at | 75.9   | 185.7  | 179.2  | 215.6  | 97.2   | 102.5  | 166.4  | 154.1  | 0.379383642 | 164.1   | 130.05  | 34.05  | 1.261822376 | 0.5156  | -1.208 |
| 161833_r_at | 7.5    | 7.4    | 29.5   | 6.7    | 5.6    | 17.3   | 8.2    | 11.7   | 0.751095672 | 12.775  | 10.7    | 2.075  | 1.193925234 | 0.9245  | -1.043 |
| 161834_at   | 2.8    | 3.4    | 6      | 8      | 9.5    | 4.5    | 4      | 9.6    | 0.381265019 | 5.05    | 6.9     | 1.85   | 0.731884058 | 0.3823  | 1.375  |
| 161835_at   | 6      | 15.5   | 6.1    | 6      | 45.1   | 2.4    | 4.1    | 30.5   | 0.331766882 | 8.4     | 20.525  | 12.125 | 0.409257004 | 0.669   | 1.411  |
| 161836_r_at | 166    | 88.3   | 163.6  | 168    | 169.3  | 84     | 78.6   | 76.9   | 0.187032347 | 146.475 | 102.2   | 44.275 | 1.433219178 | 0.1681  | -1.471 |
| 161837_r_at | 10.8   | 9.4    | 10.1   | 11     | 16.8   | 8.3    | 6.8    | 19.7   | 0.476050053 | 10.325  | 12.9    | 2.575  | 0.800387597 | 0.6496  | 1.134  |
| 161838_f_at | 3.3    | 12.2   | 1.7    | 2      | 6.9    | 8.9    | 2.1    | 1.9    | 0.962491231 | 4.8     | 4.95    | 0.15   | 0.96969697  | 0.822   | 1.151  |
| 161839_f_at | 96.9   | 80.8   | 79.3   | 96.8   | 85.5   | 81.4   | 55.8   | 108.3  | 0.653392683 | 88.45   | 82.75   | 5.7    | 1.068882175 | 0.5689  | -1.093 |
| 161840_f_at | 2      | 7.9    | 2.1    | 2.8    | 2      | 1.7    | 1.8    | 3.4    | 0.379228148 | 3.7     | 2.225   | 1.475  | 1.662921348 | 0.3418  | -1.44  |
| 161841_r_at | 41.5   | 62.6   | 90.9   | 125.4  | 42.3   | 56.9   | 114.8  | 175.9  | 0.645493106 | 80.1    | 97.475  | 17.375 | 0.821749166 | 0.7687  | 1.132  |
| 161842_r_at | 426.5  | 360.1  | 372.7  | 335.7  | 495.4  | 334    | 373.3  | 439.3  | 0.409287767 | 373.75  | 410.5   | 36.75  | 0.91047503  | 0.4241  | -1.09  |
| 161843_at   | 6.7    | 5.8    | 10.4   | 7.6    | 27.5   | 4.8    | 6.3    | 6.1    | 0.564740351 | 7.625   | 11.175  | 3.55   | 0.682326622 | 0.7604  | 1.142  |
| 161844_at   | 15     | 21.7   | 19     | 46     | 51.4   | 25.1   | 14.5   | 10.1   | 0.990136595 | 25.425  | 25.275  | 0.15   | 1.005934718 | 0.8207  | -1.107 |
| 161845_at   | 22.6   | 14.8   | 89     | 59.7   | 41.9   | 18.5   | 12.4   | 26.3   | 0.304764947 | 46.525  | 24.775  | 21.75  | 1.87790111  | 0.358   | -1.629 |
| 161846_r_at | 79.2   | 99.2   | 118.2  | 101.5  | 124.6  | 107.2  | 102.3  | 85.9   | 0.644637223 | 99.525  | 105     | 5.475  | 0.947857143 | 0.643   | -1.056 |
| 161847_r_at | 106.2  | 161.7  | 290.7  | 120.5  | 166.4  | 170.2  | 130.5  | 127.1  | 0.655171059 | 169.775 | 148.55  | 21.225 | 1.142881185 | 0.8028  | -1.064 |
| 161848_r_at | 1.6    | 12.5   | 0.8    | 7.8    | 0.9    | 3.2    | 13.9   | 1.9    | 0.869644528 | 5.675   | 4.975   | 0.7    | 1.140703518 | 0.8761  | -1.152 |
| 161849_r_at | 15.9   | 8.9    | 25.3   | 9.9    | 14.2   | 11.7   | 20.1   | 10.2   | 0.836099341 | 15      | 14.05   | 0.95   | 1.067615658 | 0.9715  | -1.011 |
| 161850_at   | 2.2    | 3.2    | 4.8    | 5.3    | 1.9    | 4.9    | 2.4    | 1.4    | 0.290645731 | 3.875   | 2.65    | 1.225  | 1.462264151 | 0.2435  | -1.549 |
| 161851_r_at | 96.7   | 81.9   | 33.4   | 55.8   | 39.4   | 54.6   | 28.5   | 39.7   | 0.156023419 | 66.95   | 40.55   | 26.4   | 1.651048089 | 0.1474  | -1.569 |
| 161852_i_at | 3.8    | 21.7   | 6.8    | 23.1   | 5.2    | 12.4   | 4.3    | 4.9    | 0.253630371 | 13.85   | 6.7     | 7.15   | 2.067164179 | 0.3118  | -1.75  |
| 161853_f_at | 34     | 46.2   | 37.1   | 78.5   | 62.7   | 55.2   | 34.6   | 35.1   | 0.875025626 | 48.95   | 46.9    | 2.05   | 1.043710021 | 0.9299  | -1.022 |
| 161854_f_at | 22.9   | 13.6   | 18.5   | 6.7    | 6.4    | 15.1   | 8.2    | 10.3   | 0.232428526 | 15.425  | 10      | 5.425  | 1.5425      | 0.2791  | -1.472 |
| 161855_at   | 4.2    | 14.5   | 3.8    | 14.9   | 4.9    | 3.3    | 4.5    | 13.5   | 0.499322919 | 9.35    | 6.55    | 2.8    | 1.427480916 | 0.5407  | -1.371 |
| 161856_f_at | 1930.6 | 1674.9 | 1611.1 | 1751.2 | 2073.4 | 1629.5 | 1646.2 | 1278.3 | 0.655087926 | 1741.95 | 1656.85 | 85.1   | 1.051362525 | 0.5783  | -1.064 |
| 161857_r_at | 105.1  | 107.8  | 124    | 122.3  | 113.4  | 142.9  | 124.6  | 63.2   | 0.843355459 | 114.8   | 111.025 | 3.775  | 1.034001351 | 0.7024  | -1.077 |
| 161858_f_at | 30.3   | 37.7   | 52.5   | 40.1   | 30.3   | 28.7   | 50     | 27.2   | 0.421986044 | 40.15   | 34.05   | 6.1    | 1.179148311 | 0.3643  | -1.194 |
| 161859_f_at | 194    | 145.9  | 212.1  | 179.8  | 255    | 166.5  | 234.1  | 155.5  | 0.516407431 | 182.95  | 202.775 | 19.825 | 0.902231537 | 0.5624  | -1.094 |
| 161860_f_at | 367.7  | 264.6  | 286.3  | 318.8  | 286.5  | 278.6  | 303.8  | 262.1  | 0.332204576 | 309.35  | 282.75  | 26.6   | 1.094076039 | 0.3223  | -1.087 |
| 161861_i_at | 19.5   | 3.1    | 10.1   | 4.1    | 11.8   | 11.6   | 3.4    | 15     | 0.792196907 | 9.2     | 10.45   | 1.25   | 0.880382775 | 0.6481  | 1.295  |
| 161862_i_at | 6.4    | 18.2   | 23.9   | 33     | 5.5    | 40.6   | 13.2   | 35.7   | 0.753207849 | 20.375  | 23.75   | 3.375  | 0.857894737 | 0.9543  | -1.036 |
| 161863_r_at | 0.5    | 0.5    | 0.2    | 0.7    | 0.3    | 0.4    | 0.7    | 9.4    | 0.39300536  | 0.475   | 2.7     | 2.225  | 0.175925926 | 0.4317  | 1.994  |
| 161864_f_at | 324.5  | 309.1  | 267.4  | 419.8  | 306.1  | 336    | 372    | 370.2  | 0.678861074 | 330.2   | 346.075 | 15.875 | 0.95412844  | 0.6043  | -1.059 |
| 161865_r_at | 16.6   | 9.5    | 11.2   | 8.7    | 73.8   | 25.6   | 12.1   | 31.8   | 0.164555079 | 11.5    | 35.825  | 24.325 | 0.321004885 | 0.05201 | 2.624  |
| 161866_at   | 12.6   | 38.9   | 20.2   | 18.6   | 66.6   | 12.3   | 18.9   | 16.9   | 0.683250338 | 22.575  | 28.675  | 6.1    | 0.787271142 | 0.848   | -1.092 |
| 161867_f_at | 6.5    | 5.5    | 3.3    | 4.8    | 5.7    | 2.8    | 5.9    | 15.3   | 0.448200856 | 5.025   | 7.425   | 2.4    | 0.676767677 | 0.5581  | 1.262  |
| 161868_r_at | 19.3   | 2.8    | 7.2    | 4.6    | 20.4   | 26.7   | 10.3   | 20.4   | 0.072433054 | 8.475   | 19.45   | 10.975 | 0.435732648 | 0.06452 | 2.814  |
| 161869_i_at | 38.2   | 39.6   | 25.7   | 26.1   | 41.5   | 34.8   | 41     | 11.5   | 0.981123254 | 32.4    | 32.2    | 0.2    | 1.00621118  | 0.7718  | -1.105 |
| 161870_at   | 64.1   | 82.7   | 114.6  | 112.6  | 97.1   | 117.8  | 75.5   | 106.9  | 0.7153944   | 93.5    | 99.325  | 5.825  | 0.94135414  | 0.6727  | -1.077 |
| 161871_f_at | 72.9   | 67.2   | 27.1   | 17     | 82.8   | 47.3   | 33.5   | 92.7   | 0.400213716 | 46.05   | 64.075  | 18.025 | 0.718689036 | 0.3628  | 1.524  |
| 161872_f_at | 314.1  | 294.3  | 293.2  | 401.4  | 362.9  | 346.9  | 325    | 317.7  | 0.678150158 | 325.75  | 338.125 | 12.375 | 0.963401109 | 0.5988  | -1.046 |
| 161873_r_at | 48.1   | 38.6   | 12.6   | 5.2    | 18.9   | 46.6   | 49.3   | 12.4   | 0.697876216 | 26.125  | 31.8    | 5.675  | 0.821540881 | 0.5684  | 1.452  |
| 161874_r_at | 146.4  | 97     | 146.1  | 243.2  | 64.7   | 135.9  | 107.6  | 126.6  | 0.216932053 | 158.175 | 108.7   | 49.475 | 1.455151794 | 0.2029  | -1.433 |
| 161875_at   | 9.3    | 3.8    | 3.2    | 14.4   | 10.8   | 4.8    | 22.4   | 13.8   | 0.290728029 | 7.675   | 12.95   | 5.275  | 0.592664093 | 0.2847  | 1.762  |
| 161876_r_at | 2      | 0.9    | 1.4    | 5.8    | 2.5    | 13.1   | 14     | 2.6    | 0.181714476 | 2.525   | 8.05    | 5.525  | 0.313664596 | 0.1265  | 3.014  |
| 161877_f_at | 590.1  | 498.8  | 611.9  | 552.3  | 643.7  | 545.3  | 427.6  | 582.3  | 0.80483193  | 563.275 | 549.725 | 13.55  | 1.024648688 | 0.7524  | -1.033 |
| 161878_r_at | 4.1    | 33     | 46     | 26.6   | 36.3   | 3.2    | 22.8   | 32     | 0.748181463 | 27.425  | 23.575  | 3.85   | 1.16330859  | 0.8371  | -1.183 |
| 161879_r_at | 314    | 301.8  | 403.3  | 558.3  | 471.8  | 431.3  | 543    | 631.1  | 0.144764782 | 394.35  | 519.3   | 124.95 | 0.759387637 | 0.1218  | 1.345  |
| 161880_r_at | 9.2    | 2      | 21.5   | 8.5    | 21.3   | 9      | 26.9   | 10.3   | 0.311254299 | 10.3    | 16.875  | 6.575  | 0.61037037  | 0.2658  | 1.981  |
| 161881_f_at | 220.3  | 245.5  | 212.2  | 283.8  | 283.3  | 220    | 250.4  | 262.5  | 0.538958827 | 240.45  | 254.05  | 13.6   | 0.946467231 | 0.5213  | -1.059 |
| 161882_f_at | 109.7  | 58.8   | 110.9  | 76.3   | 114.4  | 109.2  | 127.6  | 118.3  | 0.110288437 | 88.925  | 117.375 | 28.45  | 0.757614483 | 0.09548 | 1.364  |
| 161883_f_at | 102.6  | 77.2   | 108.9  | 101.8  | 92.8   | 104.6  | 110    | 95     | 0.728317538 | 97.625  | 100.6   | 2.975  | 0.970427435 | 0.6925  | -1.037 |
| 161884_r_at | 48.8   | 40.7   | 57.2   | 46.2   | 75     | 34.7   | 60.3   | 47.3   | 0.54860012  | 48.225  | 54.325  | 6.1    | 0.887712839 | 0.6503  | -1.09  |
| 161885_f_at | 50.4   | 50.5   | 59     | 54.3   | 42.2   | 83     | 36     | 50.9   | 0.963558127 | 53.55   | 53.025  | 0.525  | 1.00990099  | 0.7569  | -1.062 |
| 161886_at   | 2.7    | 3.8    | 2.4    | 4.5    | 7.3    | 3.3    | 5.1    | 2.5    | 0.361131609 | 3.35    | 4.55    | 1.2    | 0.736263736 | 0.3819  | 1.296  |
| 161887_r_at | 22     | 22     | 72.7   | 38.2   | 29.4   | 25.6   | 40.1   | 38.6   | 0.69527107  | 38.725  | 33.425  | 5.3    | 1.158563949 | 0.9141  | -1.035 |



|             |        |        |        |        |        |        |        |        |             |          |         |         |             |         |        |
|-------------|--------|--------|--------|--------|--------|--------|--------|--------|-------------|----------|---------|---------|-------------|---------|--------|
| 161888_r_at | 321.9  | 248    | 358    | 378.9  | 374.9  | 385.3  | 419.1  | 427.6  | 0.073441686 | 326.7    | 401.725 | 75.025  | 0.81324289  | 0.07049 | 1.243  |
| 161889_f_at | 3127   | 2148.7 | 2781   | 3054.2 | 3665.2 | 2885.3 | 3490.8 | 2852.1 | 0.193949316 | 2777.725 | 3223.35 | 445.625 | 0.861750973 | 0.204   | 1.165  |
| 161890_f_at | 4.4    | 10.8   | 30     | 46.1   | 4.9    | 33.2   | 15.4   | 26.9   | 0.819573976 | 22.825   | 20.1    | 2.725   | 1.135572139 | 0.993   | -1.006 |
| 161891_r_at | 48.2   | 80.1   | 74.1   | 81.2   | 103    | 80     | 114.9  | 121.9  | 0.030651211 | 70.9     | 104.95  | 34.05   | 0.67555979  | 0.04097 | 1.493  |
| 161892_r_at | 1.6    | 1.6    | 4.7    | 0.6    | 1.8    | 1.7    | 0.8    | 1.3    | 0.481509417 | 2.125    | 1.4     | 0.725   | 1.517857143 | 0.6255  | -1.259 |
| 161893_i_at | 11.1   | 15.9   | 35.9   | 23.3   | 58.6   | 52.5   | 39.5   | 42.3   | 0.009459442 | 21.55    | 48.225  | 26.675  | 0.44686366  | 0.0162  | 2.427  |
| 161894_r_at | 129.2  | 143.6  | 150.9  | 139.8  | 122.4  | 168    | 117.6  | 167.9  | 0.843177515 | 140.875  | 143.975 | 3.1     | 0.978468484 | 0.9316  | -1.009 |
| 161895_s_at | 312.3  | 476.9  | 380.7  | 438.4  | 496.4  | 536.8  | 513.2  | 484.5  | 0.054697703 | 402.075  | 507.725 | 105.65  | 0.791914915 | 0.04212 | 1.278  |
| 161896_at   | 14.1   | 13.5   | 16.1   | 18.2   | 14.4   | 9.9    | 11.5   | 18.2   | 0.39379556  | 15.475   | 13.5    | 1.975   | 1.146296296 | 0.3452  | -1.165 |
| 161897_f_at | 101.8  | 94.1   | 116    | 108.9  | 107.5  | 116.9  | 105.7  | 109.5  | 0.420162851 | 105.2    | 109.9   | 4.7     | 0.957233849 | 0.3923  | -1.047 |
| 161898_i_at | 512.8  | 431.8  | 524.6  | 607.4  | 474.2  | 414.4  | 433.4  | 555.4  | 0.33681214  | 519.15   | 469.35  | 49.8    | 1.106104187 | 0.3343  | -1.105 |
| 161899_f_at | 11.1   | 38.4   | 45.5   | 33.2   | 15.4   | 27.7   | 22.5   | 63.3   | 0.989739782 | 32.05    | 32.225  | 0.175   | 0.994569434 | 0.9756  | -1.014 |
| 161900_f_at | 26.2   | 20.7   | 14.2   | 27.3   | 1.6    | 9.1    | 26.1   | 26.8   | 0.420231879 | 22.1     | 15.9    | 6.2     | 1.389937107 | 0.3077  | -2.128 |
| 161901_r_at | 17.8   | 24.1   | 39.7   | 27.7   | 45.8   | 26.2   | 34.8   | 36.1   | 0.219044112 | 27.325   | 35.725  | 8.4     | 0.764870539 | 0.2003  | 1.337  |
| 161902_f_at | 87.1   | 66.3   | 76.8   | 93.4   | 81.7   | 79.4   | 86.3   | 78.4   | 0.93415878  | 80.9     | 81.45   | 0.55    | 0.993247391 | 0.8581  | -1.015 |
| 161903_f_at | 4.1    | 31.8   | 27.1   | 24.5   | 17.8   | 26.6   | 3.6    | 31.4   | 0.822494873 | 21.875   | 19.85   | 2.025   | 1.102015113 | 0.8668  | -1.129 |
| 161904_f_at | 1.9    | 2      | 1.3    | 0.7    | 2.5    | 3.8    | 3.9    | 4.1    | 0.004714937 | 1.475    | 3.575   | 2.1     | 0.412587413 | 0.01122 | 2.594  |
| 161905_r_at | 13.3   | 20.4   | 1.4    | 7.6    | 26.2   | 21.8   | 13.8   | 33.5   | 0.063211508 | 10.675   | 23.825  | 13.15   | 0.448058762 | 0.1165  | 3.069  |
| 161906_f_at | 141.6  | 176.1  | 178.1  | 190.5  | 165.6  | 188.2  | 206.6  | 180    | 0.357677997 | 171.575  | 185.1   | 13.525  | 0.926931388 | 0.3601  | -1.082 |
| 161907_s_at | 101.8  | 57.3   | 136.3  | 140.4  | 128    | 152.3  | 117.8  | 184.5  | 0.18517254  | 108.95   | 145.65  | 36.7    | 0.74802609  | 0.1978  | 1.396  |
| 161908_i_at | 27.2   | 15.1   | 15     | 16.6   | 7.8    | 25     | 22.2   | 28.6   | 0.672870792 | 18.475   | 20.9    | 2.425   | 0.883971292 | 0.8895  | -1.049 |
| 161909_r_at | 26.7   | 15.9   | 25.8   | 21.7   | 22.5   | 53.3   | 16.5   | 24.4   | 0.4867235   | 22.525   | 29.175  | 6.65    | 0.772065124 | 0.5451  | 1.194  |
| 161910_at   | 8.5    | 27     | 7.1    | 9.6    | 13     | 11     | 12.9   | 12.8   | 0.902516145 | 13.05    | 12.425  | 0.625   | 1.050301811 | 0.7421  | -1.11  |
| 161911_f_at | 185.4  | 150.2  | 114.1  | 119.5  | 195.1  | 201.2  | 195.6  | 176.9  | 0.050192336 | 142.3    | 192.2   | 49.9    | 0.74037461  | 0.03301 | 1.375  |
| 161912_r_at | 163.1  | 167.5  | 141.4  | 141.8  | 163.8  | 148.7  | 143.8  | 212.1  | 0.466901306 | 153.45   | 167.1   | 13.65   | 0.918312388 | 0.4703  | -1.079 |
| 161913_r_at | 3591.8 | 4216.5 | 4403.6 | 3689.6 | 6806.3 | 3766.7 | 4415.5 | 3309.1 | 0.503897925 | 3975.375 | 4574.4  | 599.025 | 0.8690484   | 0.547   | -1.111 |
| 161914_s_at | 1577   | 2444.2 | 2057   | 2011.8 | 3056.8 | 2163.8 | 2141.4 | 2614.4 | 0.145306179 | 2022.5   | 2494.1  | 471.6   | 0.810913756 | 0.14    | 1.234  |
| 161915_f_at | 73.3   | 86     | 47.7   | 60.6   | 90.3   | 62.5   | 64.5   | 94.9   | 0.381554335 | 66.9     | 78.05   | 11.15   | 0.857142857 | 0.3773  | 1.173  |
| 161916_r_at | 217.1  | 230.8  | 284.8  | 241    | 335.1  | 220.5  | 283.6  | 291.1  | 0.217599281 | 243.425  | 282.575 | 39.15   | 0.861452712 | 0.2198  | 1.154  |
| 161917_i_at | 367    | 843.4  | 541.9  | 692.2  | 908.5  | 667.2  | 932.5  | 577.8  | 0.279953792 | 611.125  | 771.5   | 160.375 | 0.792125729 | 0.273   | 1.295  |
| 161918_at   | 85.7   | 106.9  | 59.2   | 102.9  | 118.7  | 80.6   | 57.9   | 93.2   | 0.950778399 | 88.675   | 87.6    | 1.075   | 1.012271689 | 0.9252  | -1.02  |
| 161919_r_at | 8.1    | 4.2    | 7.7    | 9.6    | 5.4    | 6.4    | 7.7    | 4.3    | 0.331980391 | 7.4      | 5.95    | 1.45    | 1.243697479 | 0.3996  | -1.219 |
| 161920_r_at | 267.9  | 265.9  | 251.6  | 289.8  | 252.7  | 269.2  | 230.7  | 326.1  | 0.970054807 | 268.8    | 269.675 | 0.875   | 0.996755354 | 0.9622  | -1.004 |
| 161921_f_at | 37.8   | 32.5   | 36.1   | 34.1   | 67.6   | 32.5   | 52.1   | 29.7   | 0.329913782 | 35.125   | 45.475  | 10.35   | 0.772402419 | 0.3471  | 1.224  |
| 161922_r_at | 4.5    | 13.4   | 2      | 2.5    | 27.5   | 2.1    | 8.2    | 11.8   | 0.317804277 | 5.6      | 12.4    | 6.8     | 0.451612903 | 0.3226  | 2.091  |
| 161923_at   | 40.8   | 42.1   | 8.6    | 55.1   | 69     | 49.3   | 63.8   | 42.6   | 0.154335754 | 36.65    | 56.175  | 19.525  | 0.652425456 | 0.2133  | 1.834  |
| 161924_f_at | 12.5   | 15.5   | 17.8   | 18.8   | 70.3   | 16     | 52.4   | 16.5   | 0.192378968 | 16.15    | 38.8    | 22.65   | 0.416237113 | 0.1387  | 1.966  |
| 161925_at   | 14.6   | 9.3    | 6.4    | 12.7   | 10.2   | 6      | 11     | 9.5    | 0.492391389 | 10.75    | 9.175   | 1.575   | 1.171662125 | 0.5764  | -1.144 |
| 161926_r_at | 820.6  | 886.3  | 1053.4 | 799.2  | 1178.7 | 866    | 981.3  | 727.5  | 0.681860566 | 889.875  | 938.375 | 48.5    | 0.948314906 | 0.7278  | -1.044 |
| 161927_at   | 25.8   | 21.4   | 31.4   | 29.5   | 35.7   | 40.8   | 29.6   | 37.3   | 0.033664508 | 27.025   | 35.85   | 8.825   | 0.753835425 | 0.0384  | 1.332  |
| 161928_at   | 106.8  | 104.6  | 109.4  | 113.4  | 31.3   | 81     | 96.5   | 156    | 0.548364725 | 108.55   | 91.2    | 17.35   | 1.190241228 | 0.3759  | -1.381 |
| 161929_at   | 49.4   | 49.9   | 34.9   | 59.6   | 67.3   | 61.8   | 42.4   | 74.2   | 0.182513067 | 48.45    | 61.425  | 12.975  | 0.788766789 | 0.2078  | 1.264  |
| 161930_r_at | 22     | 41.1   | 47     | 23.3   | 59.4   | 56.3   | 56     | 38.5   | 0.053961746 | 33.35    | 52.55   | 19.2    | 0.634633682 | 0.06326 | 1.642  |
| 161931_r_at | 75.8   | 61.5   | 96.7   | 104.2  | 132.5  | 71.8   | 112.5  | 99.6   | 0.271212807 | 84.55    | 104.1   | 19.55   | 0.812199808 | 0.2906  | 1.227  |
| 161932_r_at | 4.4    | 5.1    | 7.2    | 11.5   | 11.2   | 11.9   | 1.3    | 14.1   | 0.467549498 | 7.05     | 9.625   | 2.575   | 0.732467532 | 0.899   | -1.082 |
| 161933_r_at | 129.2  | 90.1   | 134.7  | 150.5  | 212.1  | 103.3  | 137.6  | 191.4  | 0.272292815 | 126.125  | 161.1   | 34.975  | 0.782898821 | 0.3023  | 1.25   |
| 161934_f_at | 99.1   | 88.3   | 97.2   | 62     | 97.2   | 99.3   | 29.8   | 86.4   | 0.667501366 | 86.65    | 78.175  | 8.475   | 1.108410617 | 0.5651  | -1.207 |
| 161935_r_at | 8.6    | 9.9    | 99.1   | 35.8   | 132.1  | 47     | 13.6   | 95.4   | 0.357133529 | 38.35    | 72.025  | 33.675  | 0.532454009 | 0.3267  | 2.27   |
| 161936_at   | 10.5   | 66.9   | 54     | 16.9   | 9.2    | 15.1   | 15.7   | 17.3   | 0.197931284 | 37.075   | 14.325  | 22.75   | 2.588132635 | 0.1802  | -2.037 |
| 161937_r_at | 14     | 70.7   | 10.4   | 13.5   | 10.7   | 51.4   | 74.7   | 17     | 0.608448025 | 27.15    | 38.45   | 11.3    | 0.706111834 | 0.5469  | 1.497  |
| 161938_r_at | 41.5   | 8.9    | 52.7   | 14.7   | 7.6    | 30     | 17.5   | 7.5    | 0.300460166 | 29.45    | 15.65   | 13.8    | 1.881789137 | 0.3395  | -1.754 |
| 161939_f_at | 116.1  | 104.7  | 71.8   | 76.4   | 38.6   | 107.6  | 20.5   | 100.1  | 0.3481589   | 92.25    | 66.7    | 25.55   | 1.383058471 | 0.2623  | -1.672 |
| 161940_r_at | 3.8    | 4.9    | 11.1   | 0.1    | 1.3    | 0.7    | 5.9    | 0.6    | 0.328333232 | 4.975    | 2.125   | 2.85    | 2.341176471 | 0.612   | -1.794 |
| 161941_r_at | 665.3  | 566.6  | 703.3  | 709.6  | 817.7  | 657.9  | 724.1  | 694.8  | 0.236885507 | 661.2    | 723.625 | 62.425  | 0.913732942 | 0.2396  | -1.095 |
| 161942_f_at | 59.3   | 43.1   | 40.2   | 58.3   | 55.3   | 75.3   | 43.5   | 71.1   | 0.264144421 | 50.225   | 61.3    | 11.075  | 0.819331158 | 0.2811  | 1.211  |
| 161943_at   | 57.7   | 57.1   | 128.7  | 17     | 38.3   | 20     | 58.4   | 18.4   | 0.279750062 | 65.125   | 33.775  | 31.35   | 1.928201332 | 0.3196  | -1.72  |



|             |        |        |        |        |        |        |        |        |             |          |          |        |             |          |        |
|-------------|--------|--------|--------|--------|--------|--------|--------|--------|-------------|----------|----------|--------|-------------|----------|--------|
| 161944_at   | 3.2    | 8.5    | 26.6   | 34.7   | 8.8    | 7.2    | 20.3   | 6.2    | 0.399132915 | 18.25    | 10.625   | 7.625  | 1.717647059 | 0.6584   | -1.329 |
| 161945_at   | 5.4    | 3.3    | 6      | 4.2    | 13.6   | 5.4    | 12.8   | 7.5    | 0.079509743 | 4.725    | 9.825    | 5.1    | 0.480916031 | 0.03909  | 1.986  |
| 161946_r_at | 68.2   | 64.1   | 74.2   | 109.5  | 43.1   | 56.4   | 116.9  | 104    | 0.959781622 | 79       | 80.1     | 1.1    | 0.986267166 | 0.8688   | -1.047 |
| 161947_f_at | 143.8  | 156.1  | 151.8  | 129.3  | 137.1  | 154.1  | 165.9  | 175.1  | 0.256485096 | 145.25   | 158.05   | 12.8   | 0.919012971 | 0.265    | -1.086 |
| 161948_f_at | 60.6   | 81.9   | 47.4   | 59.3   | 57.8   | 94.6   | 48     | 67.4   | 0.720454586 | 62.3     | 66.95    | 4.65   | 0.930545183 | 0.7568   | -1.061 |
| 161949_at   | 58.9   | 122.9  | 24.8   | 74.1   | 42.5   | 75     | 108.6  | 91.6   | 0.723226793 | 70.175   | 79.425   | 9.25   | 0.883537929 | 0.5997   | 1.242  |
| 161950_at   | 2      | 10.8   | 2      | 2      | 15.3   | 1.2    | 14.5   | 27.8   | 0.148499574 | 4.2      | 14.7     | 10.5   | 0.285714286 | 0.2168   | 3.069  |
| 161951_f_at | 294.9  | 251.7  | 236.3  | 251.9  | 210    | 295.8  | 287.2  | 277.1  | 0.719644638 | 258.7    | 267.525  | 8.825  | 0.967012429 | 0.7715   | -1.028 |
| 161952_r_at | 0.3    | 0.5    | 2.1    | 0.2    | 6.3    | 0.6    | 0.1    | 3.6    | 0.289357685 | 0.775    | 2.65     | 1.875  | 0.29245283  | 0.6158   | 1.862  |
| 161953_at   | 13.7   | 11.2   | 23.5   | 15.8   | 38.7   | 16.4   | 34.2   | 13.5   | 0.230495256 | 16.05    | 25.7     | 9.65   | 0.624513619 | 0.2292   | 1.505  |
| 161954_r_at | 31.6   | 8.1    | 7.6    | 19.6   | 11.2   | 7.1    | 8.6    | 19.9   | 0.469645138 | 16.725   | 11.7     | 5.025  | 1.429487179 | 0.5528   | -1.295 |
| 161955_f_at | 46.1   | 34.9   | 56.8   | 33     | 52.7   | 29.5   | 44.8   | 39.4   | 0.886160589 | 42.7     | 41.6     | 1.1    | 1.026442308 | 0.8965   | -1.024 |
| 161956_at   | 25.4   | 80.3   | 80.7   | 77     | 84.3   | 55.3   | 55.1   | 93.3   | 0.726936189 | 65.85    | 72       | 6.15   | 0.914583333 | 0.6337   | 1.172  |
| 161957_r_at | 0.6    | 0.3    | 1.3    | 2.1    | 1.3    | 1.2    | 1      | 1.5    | 0.697875163 | 1.075    | 1.25     | 0.175  | 0.86        | 0.3751   | 1.555  |
| 161958_at   | 2.4    | 13.4   | 12.7   | 2.5    | 26.1   | 2.2    | 3.1    | 4.4    | 0.861447573 | 7.75     | 8.95     | 1.2    | 0.865921788 | 0.9307   | -1.069 |
| 161959_f_at | 0.4    | 6.6    | 0.9    | 1      | 17.5   | 5.8    | 12.3   | 9.2    | 0.027510745 | 2.225    | 11.2     | 8.975  | 0.198660714 | 0.0159   | 8.451  |
| 161960_f_at | 199.1  | 272.2  | 238.1  | 289.8  | 311.4  | 249.2  | 317.2  | 419.9  | 0.128780849 | 249.8    | 324.425  | 74.625 | 0.769977653 | 0.1095   | 1.289  |
| 161961_at   | 110    | 130.5  | 82.7   | 35.7   | 60.1   | 123.2  | 186.1  | 34.4   | 0.788707395 | 89.725   | 100.95   | 11.225 | 0.88880634  | 0.9544   | -1.029 |
| 161962_f_at | 2805.2 | 3133.1 | 2968.3 | 2494.9 | 2443.4 | 3535.8 | 3276.7 | 3693.4 | 0.274454258 | 2850.375 | 3237.325 | 386.95 | 0.880472304 | 0.3025   | -1.126 |
| 161963_f_at | 39.4   | 40.8   | 68.2   | 50.3   | 16     | 25     | 13.4   | 25.5   | 0.013626684 | 49.675   | 19.975   | 29.7   | 2.486858573 | 0.004052 | -2.52  |
| 161964_r_at | 202.6  | 176.2  | 318.3  | 284.2  | 237.8  | 193.1  | 277.6  | 231.5  | 0.796168837 | 245.325  | 235      | 10.325 | 1.04393617  | 0.8902   | -1.023 |
| 161965_r_at | 225.5  | 260.6  | 412.1  | 262.6  | 369.4  | 278.9  | 345    | 368.7  | 0.335675657 | 290.2    | 340.5    | 50.3   | 0.852276065 | 0.2636   | 1.198  |
| 161966_f_at | 162.5  | 279.8  | 264.6  | 215.3  | 213.7  | 187.5  | 245.5  | 254.6  | 0.871608703 | 230.55   | 225.325  | 5.225  | 1.023188727 | 0.9548   | -1.008 |
| 161967_at   | 294.9  | 230.9  | 235.8  | 223.7  | 262.6  | 126.4  | 76.5   | 370.6  | 0.620989005 | 246.325  | 209.025  | 37.3   | 1.178447554 | 0.3896   | -1.398 |
| 161968_f_at | 3.1    | 1.6    | 4.7    | 2.2    | 3.5    | 4.3    | 3.2    | 1.8    | 0.737663575 | 2.9      | 3.2      | 0.3    | 0.90625     | 0.6629   | 1.149  |
| 161969_f_at | 106.8  | 19.1   | 27.9   | 20.9   | 26.9   | 16.9   | 25.8   | 27.6   | 0.427921327 | 43.675   | 24.3     | 19.375 | 1.797325103 | 0.4627   | -1.385 |
| 161970_f_at | 162.9  | 161.3  | 159.6  | 184    | 210.3  | 160.1  | 194.1  | 175.3  | 0.210628931 | 166.95   | 184.95   | 18     | 0.902676399 | 0.1976   | -1.104 |
| 161971_r_at | 5.3    | 18.6   | 13.5   | 22.7   | 15     | 13.8   | 20.7   | 19.3   | 0.622940765 | 15.025   | 17.2     | 2.175  | 0.873546512 | 0.4843   | 1.284  |
| 161972_r_at | 0.7    | 1.1    | 1      | 1.1    | 1.4    | 0.5    | 1.1    | 1.3    | 0.675265721 | 0.975    | 1.075    | 0.1    | 0.906976744 | 0.8815   | -1.04  |
| 161973_r_at | 18.8   | 83.8   | 56.5   | 83.1   | 146.8  | 110.2  | 15.3   | 26     | 0.712021756 | 60.55    | 74.575   | 14.025 | 0.811934294 | 0.9587   | -1.036 |
| 161974_r_at | 25     | 38.4   | 42.9   | 35.9   | 13.5   | 28.4   | 33.4   | 42.9   | 0.4437615   | 35.55    | 29.55    | 6      | 1.203045685 | 0.4022   | -1.281 |
| 161975_r_at | 14.5   | 41.3   | 16.1   | 19.2   | 37.1   | 20.8   | 26.2   | 43.6   | 0.303591941 | 22.775   | 31.925   | 9.15   | 0.71339076  | 0.2286   | 1.476  |
| 161976_r_at | 9      | 3.8    | 1.6    | 1.2    | 2.8    | 3.2    | 0.9    | 1.5    | 0.397500677 | 3.9      | 2.1      | 1.8    | 1.857142857 | 0.4586   | -1.544 |
| 161977_r_at | 3.8    | 12.7   | 21.1   | 11.4   | 5.7    | 12.3   | 5.7    | 6.6    | 0.292631193 | 12.25    | 7.575    | 4.675  | 1.617161716 | 0.3971   | -1.447 |
| 161978_r_at | 1.5    | 5.7    | 2.8    | 2.4    | 4      | 0.7    | 2.5    | 1.6    | 0.464995296 | 3.1      | 2.2      | 0.9    | 1.409090909 | 0.4163   | -1.492 |
| 161979_f_at | 15.9   | 1.4    | 11.6   | 8.7    | 6.3    | 16.6   | 11.2   | 5.3    | 0.914248287 | 9.4      | 9.85     | 0.45   | 0.954314721 | 0.6912   | 1.288  |
| 161980_f_at | 80.6   | 260.4  | 88.4   | 102.8  | 183.9  | 160.1  | 117    | 208    | 0.50454456  | 133.05   | 167.25   | 34.2   | 0.795515695 | 0.3075   | 1.393  |
| 161981_r_at | 12.1   | 1.3    | 0.5    | 5.4    | 14.5   | 1.4    | 9      | 17.9   | 0.24099747  | 4.825    | 10.7     | 5.875  | 0.450934579 | 0.2788   | 2.977  |
| 161982_at   | 9.7    | 18.4   | 25.4   | 25.9   | 15.7   | 14.3   | 14.6   | 6.1    | 0.16514556  | 19.85    | 12.675   | 7.175  | 1.566074951 | 0.2159   | -1.555 |
| 161983_f_at | 227.5  | 220    | 237.1  | 338.7  | 243.6  | 238.2  | 250.3  | 349.4  | 0.717911944 | 255.825  | 270.375  | 14.55  | 0.946185853 | 0.6814   | -1.06  |
| 161984_f_at | 1164.7 | 1260.3 | 1176.6 | 1646.1 | 2207.7 | 1710.6 | 1847.4 | 1575.6 | 0.026382858 | 1311.925 | 1835.325 | 523.4  | 0.714818901 | 0.02056  | 1.402  |
| 161985_f_at | 38.7   | 31.8   | 9.4    | 29     | 20.3   | 38.2   | 28.8   | 20.2   | 0.964959239 | 27.225   | 26.875   | 0.35   | 1.013023256 | 0.8411   | -1.077 |
| 161986_f_at | 37     | 32.8   | 35.5   | 36.9   | 13.2   | 22.8   | 51.5   | 36.1   | 0.616512413 | 35.55    | 30.9     | 4.65   | 1.150485437 | 0.4118   | -1.298 |
| 161987_at   | 143    | 156.4  | 116.9  | 143.1  | 197.7  | 163.4  | 177.7  | 273.2  | 0.076133496 | 139.85   | 203      | 63.15  | 0.688916256 | 0.03158  | 1.431  |
| 161988_f_at | 83.3   | 65.7   | 82.9   | 81.7   | 112.4  | 88.2   | 79.4   | 66.8   | 0.473070591 | 78.4     | 86.7     | 8.3    | 0.904267589 | 0.5042   | -1.091 |
| 161989_f_at | 52.8   | 37.6   | 18.5   | 16.5   | 21.6   | 19.5   | 19.7   | 22.2   | 0.305181875 | 31.35    | 20.75    | 10.6   | 1.510843373 | 0.332    | -1.347 |
| 161990_f_at | 373.5  | 497.8  | 475.1  | 479.5  | 481.7  | 397.1  | 449.4  | 512.8  | 0.922968626 | 456.475  | 460.25   | 3.775  | 0.991797936 | 0.911    | -1.01  |
| 161991_at   | 25.3   | 30.2   | 46.5   | 46.5   | 25.3   | 26     | 15.2   | 17.6   | 0.053500375 | 37.125   | 21.025   | 16.1   | 1.765755054 | 0.03286  | -1.752 |
| 161992_at   | 5      | 14.1   | 32.4   | 32.6   | 40.6   | 9.5    | 29.3   | 16     | 0.782244003 | 21.025   | 23.85    | 2.825  | 0.881551363 | 0.7001   | 1.248  |
| 161993_r_at | 19.5   | 11.3   | 13.1   | 2.2    | 21.5   | 1.4    | 1.3    | 2.1    | 0.45300291  | 11.525   | 6.575    | 4.95   | 1.752851711 | 0.2333   | -2.971 |
| 161994_f_at | 190.1  | 270.2  | 197.1  | 248.1  | 245.2  | 295.9  | 274    | 373.9  | 0.085826859 | 226.375  | 297.25   | 70.875 | 0.76156434  | 0.0715   | 1.311  |
| 161995_r_at | 474.9  | 487.8  | 735.2  | 618.4  | 800.2  | 578    | 600.4  | 585.7  | 0.474636544 | 579.075  | 641.075  | 62     | 0.903287447 | 0.4336   | -1.115 |
| 161996_f_at | 36     | 14.8   | 18.2   | 12.2   | 15.8   | 8.6    | 42.6   | 14     | 0.995909279 | 20.3     | 20.25    | 0.05   | 1.002469136 | 0.8255   | -1.099 |
| 161997_f_at | 223.8  | 458.3  | 327    | 460.9  | 564    | 389.3  | 461.1  | 410.8  | 0.252682808 | 367.5    | 456.3    | 88.8   | 0.80539119  | 0.2408   | 1.281  |
| 161998_f_at | 86.4   | 126.2  | 90     | 104    | 117.7  | 141.8  | 127.2  | 97.6   | 0.183714009 | 101.65   | 121.075  | 19.425 | 0.839562255 | 0.1792   | 1.193  |
| 161999_at   | 3.4    | 3.1    | 3.9    | 3.4    | 4.6    | 3.6    | 4.8    | 4.4    | 0.033527199 | 3.45     | 4.35     | 0.9    | 0.793103448 | 0.02343  | 1.255  |



|             |        |        |        |        |        |        |        |        |             |          |         |         |             |         |        |
|-------------|--------|--------|--------|--------|--------|--------|--------|--------|-------------|----------|---------|---------|-------------|---------|--------|
| 162000_r_at | 25.2   | 12.1   | 21.7   | 14     | 36.2   | 7      | 16     | 22.6   | 0.763921227 | 18.25    | 20.45   | 2.2     | 0.892420538 | 0.9944  | -1.003 |
| 162001_f_at | 99.1   | 129    | 130.2  | 131.3  | 114.7  | 122.5  | 140    | 165.5  | 0.374030225 | 122.4    | 135.675 | 13.275  | 0.902155887 | 0.3831  | -1.105 |
| 162002_r_at | 64.7   | 11     | 21.1   | 36.2   | 57.7   | 54.3   | 39.1   | 52.1   | 0.234420478 | 33.25    | 50.8    | 17.55   | 0.654527559 | 0.1637  | 1.848  |
| 162003_at   | 237.7  | 169.4  | 195    | 241.6  | 201.3  | 147.2  | 171.5  | 259.2  | 0.609431181 | 210.925  | 194.8   | 16.125  | 1.082777207 | 0.5596  | -1.096 |
| 162004_i_at | 75.3   | 53.5   | 54.1   | 67     | 101    | 96.8   | 73     | 47.7   | 0.268248042 | 62.475   | 79.625  | 17.15   | 0.784615385 | 0.3106  | 1.237  |
| 162005_at   | 192.5  | 196.7  | 224    | 266.8  | 274.9  | 190.9  | 236.4  | 257.1  | 0.456339251 | 220      | 239.825 | 19.825  | 0.917335557 | 0.4617  | -1.09  |
| 162006_r_at | 587.9  | 540.2  | 607.6  | 728.9  | 662.3  | 583.6  | 618.7  | 653.6  | 0.775355974 | 616.15   | 629.55  | 13.4    | 0.978714955 | 0.7173  | -1.027 |
| 162007_i_at | 107.2  | 170.3  | 140.9  | 196.9  | 185.3  | 149.4  | 213.8  | 134.8  | 0.541638143 | 153.825  | 170.825 | 17      | 0.90048295  | 0.5222  | 1.12   |
| 162008_r_at | 1.5    | 14.2   | 2.2    | 1.4    | 18.6   | 1.6    | 4.9    | 1.4    | 0.738711003 | 4.825    | 6.625   | 1.8     | 0.728301887 | 0.7277  | 1.343  |
| 162009_f_at | 191.5  | 179.3  | 199.3  | 264    | 314.3  | 228.1  | 260.1  | 278.3  | 0.056349453 | 208.525  | 270.2   | 61.675  | 0.771743153 | 0.05096 | 1.302  |
| 162010_r_at | 46.5   | 51.8   | 54.7   | 53.3   | 47.9   | 50.5   | 54.4   | 45.3   | 0.467426464 | 51.575   | 49.525  | 2.05    | 1.041393236 | 0.4648  | -1.042 |
| 162011_f_at | 233.8  | 287.2  | 324.8  | 294    | 325.3  | 260.5  | 380.6  | 493.6  | 0.207211578 | 284.95   | 365     | 80.05   | 0.780684932 | 0.1835  | 1.255  |
| 162012_r_at | 0.3    | 0.5    | 0.8    | 1      | 0.6    | 0.4    | 8      | 0.5    | 0.42609442  | 0.65     | 2.375   | 1.725   | 0.273684211 | 0.5244  | 1.652  |
| 162013_f_at | 920.5  | 793.9  | 1018.4 | 825.9  | 1170.8 | 802.3  | 944.4  | 1152.1 | 0.266850366 | 889.675  | 1017.4  | 127.725 | 0.874459406 | 0.2751  | 1.136  |
| 162014_i_at | 305.9  | 232.4  | 476.1  | 374.4  | 691    | 278.5  | 395.7  | 363.3  | 0.451334593 | 347.2    | 432.125 | 84.925  | 0.803471218 | 0.4543  | 1.216  |
| 162015_f_at | 37     | 24.2   | 46.8   | 10.9   | 49.5   | 28.5   | 16.5   | 1.9    | 0.674987455 | 29.725   | 24.1    | 5.625   | 1.23340249  | 0.4832  | -1.794 |
| 162016_f_at | 37.7   | 64.7   | 54     | 57.6   | 41.5   | 27.1   | 27.4   | 29.5   | 0.021598146 | 53.5     | 31.375  | 22.125  | 1.705179283 | 0.01361 | -1.7   |
| 162017_at   | 31.2   | 54.5   | 16.6   | 16.5   | 48.6   | 48     | 37.3   | 20.2   | 0.461226899 | 29.7     | 38.525  | 8.825   | 0.770927969 | 0.3832  | 1.394  |
| 162018_r_at | 85.4   | 96     | 77.4   | 74.8   | 102.2  | 93.1   | 60.7   | 88.3   | 0.803156968 | 83.4     | 86.075  | 2.675   | 0.968922451 | 0.89    | -1.019 |
| 162019_r_at | 508.7  | 462.8  | 660.9  | 526.4  | 650.2  | 401.6  | 491.8  | 662.5  | 0.882599353 | 539.7    | 551.525 | 11.825  | 0.978559449 | 0.949   | -1.01  |
| 162020_at   | 140    | 107.6  | 170.3  | 239.4  | 161.5  | 188.4  | 208.7  | 113.8  | 0.91747587  | 164.325  | 168.1   | 3.775   | 0.977543129 | 0.8559  | -1.041 |
| 162021_r_at | 112.6  | 91.9   | 97.1   | 92.5   | 65.4   | 141.5  | 38.7   | 136.1  | 0.912509141 | 98.525   | 95.425  | 3.1     | 1.032486246 | 0.6277  | -1.175 |
| 162022_f_at | 83.2   | 228.8  | 144.2  | 129.3  | 269    | 141.4  | 139    | 207.3  | 0.361935923 | 146.375  | 189.175 | 42.8    | 0.77375446  | 0.3233  | 1.326  |
| 162023_f_at | 250.2  | 256    | 292.6  | 305.7  | 353.9  | 297.6  | 326.9  | 283.9  | 0.10634961  | 276.125  | 315.575 | 39.45   | 0.874990097 | 0.103   | 1.143  |
| 162024_at   | 7.4    | 36.7   | 12.9   | 8.6    | 11.9   | 7.2    | 23.2   | 10.4   | 0.694835429 | 16.4     | 13.175  | 3.225   | 1.244781784 | 0.8305  | -1.102 |
| 162025_r_at | 4.5    | 1.4    | 1.8    | 3.2    | 11     | 0.7    | 9.9    | 2      | 0.321291067 | 2.725    | 5.9     | 3.175   | 0.461864407 | 0.6334  | 1.428  |
| 162026_r_at | 165.8  | 168    | 237.3  | 207.3  | 145.4  | 140.8  | 201.3  | 236.7  | 0.655435471 | 194.6    | 181.05  | 13.55   | 1.074841204 | 0.5996  | -1.089 |
| 162027_f_at | 40.5   | 52.7   | 33.4   | 59.6   | 22.4   | 21.1   | 74     | 63     | 0.928330217 | 46.55    | 45.125  | 1.425   | 1.031578947 | 0.6606  | -1.179 |
| 162028_f_at | 16.5   | 16.2   | 29.3   | 19.8   | 24.3   | 26.4   | 22.4   | 15.2   | 0.692851829 | 20.45    | 22.075  | 1.625   | 0.926387316 | 0.6568  | -1.09  |
| 162029_r_at | 4.8    | 1.2    | 1.8    | 9.2    | 21.3   | 6.6    | 10.5   | 7.9    | 0.116839453 | 4.25     | 11.575  | 7.325   | 0.367170626 | 0.0639  | 3.325  |
| 162030_r_at | 150.7  | 392    | 449    | 278.1  | 425.4  | 261.7  | 401.9  | 77.9   | 0.812499068 | 317.45   | 291.725 | 25.725  | 1.088182364 | 0.6998  | -1.206 |
| 162031_f_at | 336.9  | 352.3  | 442.7  | 393.8  | 413    | 445.2  | 397.2  | 420.8  | 0.216738992 | 381.425  | 419.05  | 37.625  | 0.910213578 | 0.1821  | -1.104 |
| 162032_f_at | 1370.6 | 1966.4 | 1751.9 | 2317.4 | 1910.5 | 1872.3 | 2264.3 | 2608.1 | 0.280339859 | 1851.575 | 2163.8  | 312.225 | 0.855705241 | 0.2695  | 1.179  |
| 162033_f_at | 274.6  | 432.2  | 403.2  | 433.1  | 415    | 311.8  | 373.3  | 518.8  | 0.753522186 | 385.775  | 404.725 | 18.95   | 0.953178084 | 0.7657  | -1.049 |
| 162034_r_at | 49.2   | 54.9   | 43.1   | 49.6   | 58.3   | 66.5   | 52.1   | 53.2   | 0.091208209 | 49.2     | 57.525  | 8.325   | 0.855280313 | 0.08296 | 1.167  |
| 162035_f_at | 16.1   | 39.1   | 20.8   | 22.9   | 32.7   | 23.9   | 21.4   | 10.1   | 0.70636099  | 24.725   | 22.025  | 2.7     | 1.122587968 | 0.6612  | -1.154 |
| 162036_r_at | 134    | 142.8  | 303    | 186.5  | 295.7  | 231.8  | 267.3  | 189.9  | 0.281662766 | 191.575  | 246.175 | 54.6    | 0.77820656  | 0.2115  | 1.339  |
| 162037_f_at | 166.8  | 186.8  | 172.9  | 188.1  | 128.5  | 175    | 209.2  | 248.9  | 0.680898387 | 178.65   | 190.4   | 11.75   | 0.938287815 | 0.8103  | -1.037 |
| 162038_f_at | 66.3   | 26.8   | 23.4   | 40.6   | 55.5   | 21.6   | 82.3   | 16.3   | 0.809175101 | 39.275   | 43.925  | 4.65    | 0.894137735 | 0.9805  | -1.012 |
| 162039_f_at | 69.6   | 130.1  | 139    | 170    | 171.8  | 87.4   | 178.9  | 173.1  | 0.430422741 | 127.175  | 152.8   | 25.625  | 0.83229712  | 0.4828  | 1.214  |
| 162040_r_at | 18.6   | 11.4   | 12.1   | 12.9   | 27.1   | 16.1   | 15.5   | 13.4   | 0.280022073 | 13.75    | 18.025  | 4.275   | 0.762829404 | 0.2285  | 1.29   |
| 162041_f_at | 300.9  | 220.5  | 304.1  | 266    | 307.3  | 308.1  | 268.1  | 279.5  | 0.455804548 | 272.875  | 290.75  | 17.875  | 0.938521066 | 0.43    | -1.072 |
| 162042_i_at | 7.6    | 3      | 11.5   | 6.6    | 10.5   | 7.5    | 6.7    | 6.3    | 0.785011718 | 7.175    | 7.75    | 0.575   | 0.925806452 | 0.6146  | 1.175  |
| 162043_i_at | 21.7   | 4.2    | 3.5    | 11.6   | 7.7    | 22.1   | 2.1    | 4      | 0.843850376 | 10.25    | 8.975   | 1.275   | 1.142061281 | 0.7261  | -1.275 |
| 162044_f_at | 34.7   | 7.8    | 42     | 28.6   | 9.8    | 5      | 20.7   | 35.5   | 0.333090437 | 28.275   | 17.75   | 10.525  | 1.592957746 | 0.3762  | -1.732 |
| 162045_r_at | 27.3   | 62.9   | 27.3   | 54.6   | 77.4   | 41.2   | 17.9   | 23.7   | 0.861700717 | 43.025   | 40.05   | 2.975   | 1.074282147 | 0.6975  | -1.174 |
| 162046_at   | 1.1    | 1.4    | 1.1    | 11.8   | 1.6    | 1.7    | 14.2   | 1.5    | 0.834417764 | 3.85     | 4.75    | 0.9     | 0.810526316 | 0.7182  | 1.351  |
| 162047_f_at | 44.5   | 43.7   | 66     | 40.5   | 56.7   | 52.6   | 52.9   | 75.2   | 0.227202356 | 48.675   | 59.35   | 10.675  | 0.820134794 | 0.1878  | 1.228  |
| 162048_r_at | 30.3   | 18.7   | 29.3   | 14     | 9      | 16.2   | 12.3   | 23     | 0.16739695  | 23.075   | 15.125  | 7.95    | 1.525619835 | 0.1644  | -1.54  |
| 162049_f_at | 42.1   | 41.6   | 58.7   | 56.4   | 66.3   | 56     | 86.8   | 90     | 0.046621644 | 49.7     | 74.775  | 25.075  | 0.664660649 | 0.03304 | 1.495  |
| 162050_at   | 32.8   | 34.3   | 31.8   | 21.9   | 24.4   | 49.1   | 31.5   | 31     | 0.55613434  | 30.2     | 34      | 3.8     | 0.888235294 | 0.5952  | -1.106 |
| 162051_r_at | 0.1    | 0.1    | 1      | 0.1    | 0.2    | 0.1    | 1.4    | 0.1    | 0.760115647 | 0.325    | 0.45    | 0.125   | 0.722222222 | 0.7616  | 1.344  |
| 162052_i_at | 12.2   | 11.6   | 35.9   | 25     | 6.8    | 31.1   | 15.8   | 16.8   | 0.660222989 | 21.175   | 17.625  | 3.55    | 1.20141844  | 0.646   | -1.223 |
| 162053_i_at | 32.3   | 29.9   | 19.6   | 53.1   | 8.5    | 37.9   | 51.3   | 31.4   | 0.902911513 | 33.725   | 32.275  | 1.45    | 1.044926414 | 0.7212  | -1.181 |
| 162054_r_at | 10.1   | 24.9   | 20.6   | 18.1   | 40.2   | 8.6    | 22.2   | 26.8   | 0.448013984 | 18.425   | 24.45   | 6.025   | 0.753578732 | 0.6217  | 1.219  |
| 162055_f_at | 193.7  | 237.3  | 228.1  | 228.1  | 294.8  | 214.7  | 221.2  | 285.9  | 0.230973374 | 221.8    | 254.15  | 32.35   | 0.872712965 | 0.2232  | 1.137  |



|             |        |       |        |        |        |        |        |       |             |         |          |         |             |         |        |
|-------------|--------|-------|--------|--------|--------|--------|--------|-------|-------------|---------|----------|---------|-------------|---------|--------|
| 162056_f_at | 23.2   | 22.5  | 30.9   | 28     | 32.2   | 100.7  | 37.9   | 30.8  | 0.245638763 | 26.15   | 50.4     | 24.25   | 0.518849206 | 0.1158  | 1.7    |
| 162057_f_at | 486.2  | 484   | 691    | 712.9  | 732.4  | 688.3  | 597.9  | 753.5 | 0.227428544 | 593.525 | 693.025  | 99.5    | 0.856426536 | 0.2061  | 1.183  |
| 162058_f_at | 37.5   | 24.2  | 18.7   | 19.9   | 28.9   | 24.4   | 26.7   | 8.8   | 0.662876583 | 25.075  | 22.2     | 2.875   | 1.129504505 | 0.5987  | -1.194 |
| 162059_r_at | 66.4   | 4.1   | 40.8   | 0.1    | 0.5    | 12.8   | 0.3    | 39.4  | 0.461542194 | 27.85   | 13.25    | 14.6    | 2.101886792 | 0.7625  | -1.835 |
| 162060_r_at | 5.1    | 4.4   | 6.7    | 4.7    | 11.8   | 4.4    | 5.5    | 5.8   | 0.404223241 | 5.225   | 6.875    | 1.65    | 0.76        | 0.3953  | 1.237  |
| 162061_f_at | 107.1  | 111.2 | 100.4  | 87.1   | 81.6   | 83.7   | 144.2  | 74.9  | 0.769995021 | 101.45  | 96.1     | 5.35    | 1.055671176 | 0.6066  | -1.09  |
| 162062_r_at | 15.7   | 3.1   | 0.6    | 5      | 12.4   | 1      | 10.4   | 2.3   | 0.925980957 | 6.1     | 6.525    | 0.425   | 0.9348659   | 0.8515  | 1.198  |
| 162063_f_at | 7.1    | 3.5   | 19.2   | 18.7   | 8.6    | 8.7    | 20.9   | 33.4  | 0.454081518 | 12.125  | 17.9     | 5.775   | 0.677374302 | 0.4343  | 1.563  |
| 162064_at   | 23.2   | 7.5   | 26.2   | 12.7   | 22.3   | 8.1    | 9.6    | 16.4  | 0.570596526 | 17.4    | 14.1     | 3.3     | 1.234042553 | 0.6498  | -1.195 |
| 162065_r_at | 28.4   | 29.6  | 53.5   | 37.5   | 63.5   | 57.4   | 51.5   | 43.3  | 0.063511961 | 37.25   | 53.925   | 16.675  | 0.690774223 | 0.05672 | 1.481  |
| 162066_f_at | 103.8  | 58.9  | 189.9  | 142.3  | 91.5   | 42.9   | 123.3  | 63.3  | 0.243094575 | 123.725 | 80.25    | 43.475  | 1.541744548 | 0.2609  | -1.524 |
| 162067_at   | 42.7   | 18.1  | 25.9   | 88.8   | 37.3   | 40.4   | 29.7   | 93.7  | 0.7767279   | 43.875  | 50.275   | 6.4     | 0.872700149 | 0.6322  | 1.24   |
| 162068_r_at | 24.7   | 19.4  | 4.6    | 5.9    | 5.9    | 4.3    | 5.9    | 12.1  | 0.283289062 | 13.65   | 7.05     | 6.6     | 1.936170213 | 0.3367  | -1.643 |
| 162069_at   | 31     | 8.9   | 37.4   | 35.5   | 43.6   | 18.8   | 47.7   | 62.9  | 0.234569994 | 28.2    | 43.25    | 15.05   | 0.652023121 | 0.3094  | 1.611  |
| 162070_r_at | 3      | 2.3   | 30.2   | 6.1    | 3.4    | 14     | 2.7    | 12.9  | 0.782475157 | 10.4    | 8.25     | 2.15    | 1.260606061 | 0.9218  | -1.077 |
| 162071_i_at | 38.3   | 38.7  | 60     | 16.7   | 59.7   | 32.6   | 22.8   | 31.2  | 0.881859145 | 38.425  | 36.575   | 1.85    | 1.050580998 | 0.9619  | -1.017 |
| 162072_at   | 5.7    | 3.8   | 9.9    | 15.1   | 6.8    | 7.4    | 6.7    | 4.5   | 0.436979327 | 8.625   | 6.35     | 2.275   | 1.358267717 | 0.5872  | -1.205 |
| 162073_r_at | 8.4    | 26.7  | 2.8    | 9      | 3      | 22.3   | 11     | 5.8   | 0.864155786 | 11.725  | 10.525   | 1.2     | 1.114014252 | 0.9094  | -1.078 |
| 162074_r_at | 277.3  | 178.8 | 285.3  | 255.2  | 194.2  | 232.5  | 222.4  | 230.1 | 0.323022634 | 249.15  | 219.8    | 29.35   | 1.133530482 | 0.3717  | -1.118 |
| 162075_r_at | 1.4    | 1.1   | 1      | 0.5    | 5.4    | 1      | 1.4    | 1.9   | 0.253441197 | 1       | 2.425    | 1.425   | 0.412371134 | 0.1522  | 2.036  |
| 162076_r_at | 1.1    | 0.3   | 0.2    | 1.8    | 10.1   | 0.3    | 1.1    | 2.8   | 0.31157444  | 0.85    | 3.575    | 2.725   | 0.237762238 | 0.245   | 3.213  |
| 162077_f_at | 1877.4 | 2335  | 2120.3 | 2508.5 | 2643.4 | 2270   | 2286.2 | 3105  | 0.182581698 | 2210.3  | 2576.15  | 365.85  | 0.857985754 | 0.1713  | 1.163  |
| 162078_at   | 34.3   | 24.4  | 10.6   | 8.9    | 29.3   | 28.4   | 21.5   | 27    | 0.334710081 | 19.55   | 26.55    | 7       | 0.736346516 | 0.221   | 1.575  |
| 162079_at   | 6.5    | 11.2  | 5.6    | 6.5    | 7.4    | 5.6    | 9.4    | 6.1   | 0.839316289 | 7.45    | 7.125    | 0.325   | 1.045614035 | 0.893   | -1.027 |
| 162080_f_at | 34.2   | 46.1  | 52     | 44     | 39     | 45.1   | 39.5   | 57    | 0.853863704 | 44.075  | 45.15    | 1.075   | 0.976190476 | 0.853   | -1.024 |
| 162081_f_at | 677.1  | 595.9 | 701.4  | 568    | 831.8  | 703.4  | 721.2  | 762.7 | 0.032163404 | 635.6   | 754.775  | 119.175 | 0.842105263 | 0.03232 | 1.189  |
| 162082_r_at | 6      | 16    | 25     | 21.2   | 4.9    | 23.1   | 15.1   | 25.2  | 0.996904251 | 17.05   | 17.075   | 0.025   | 0.998535871 | 0.9383  | -1.041 |
| 162083_f_at | 56.1   | 22.2  | 42.4   | 41     | 53.8   | 59.1   | 47.4   | 43.7  | 0.238859742 | 40.425  | 51       | 10.575  | 0.792647059 | 0.227   | 1.321  |
| 162084_i_at | 34.1   | 51.4  | 45.5   | 25.5   | 32.5   | 64.1   | 58.1   | 95.3  | 0.170937479 | 39.125  | 62.5     | 23.375  | 0.626       | 0.1607  | 1.544  |
| 162085_r_at | 16.9   | 9     | 51.4   | 9      | 14.2   | 6.7    | 4.2    | 38.6  | 0.675397724 | 21.575  | 15.925   | 5.65    | 1.354788069 | 0.5678  | -1.468 |
| 162086_r_at | 0.7    | 2.7   | 0.8    | 4.8    | 1.6    | 1.4    | 2      | 0.7   | 0.463916752 | 2.25    | 1.425    | 0.825   | 1.578947368 | 0.6748  | -1.259 |
| 162087_f_at | 7.2    | 9.8   | 15.4   | 11.1   | 16.3   | 11.8   | 18.9   | 31.8  | 0.129999714 | 10.875  | 19.7     | 8.825   | 0.552030457 | 0.07403 | 1.754  |
| 162088_r_at | 22     | 6     | 24.7   | 10.3   | 4.4    | 5.8    | 23.8   | 13.2  | 0.555520607 | 15.75   | 11.8     | 3.95    | 1.334745763 | 0.5061  | -1.433 |
| 162089_r_at | 1763.9 | 1920  | 2107.1 | 1744.2 | 2527.5 | 1887.9 | 1968.1 | 1801  | 0.423388836 | 1883.8  | 2046.125 | 162.325 | 0.920667115 | 0.4142  | -1.08  |
| 162090_i_at | 2.2    | 8.8   | 13     | 16.1   | 16.6   | 16.2   | 14.9   | 17    | 0.132333518 | 10.025  | 16.175   | 6.15    | 0.619783617 | 0.1657  | 2.014  |
| 162091_f_at | 543.4  | 733.5 | 517.1  | 702.8  | 634.8  | 639    | 600.3  | 693.8 | 0.776208357 | 624.2   | 641.975  | 17.775  | 0.972312006 | 0.6956  | -1.039 |
| 162092_f_at | 65.5   | 55.6  | 65.6   | 95.3   | 56     | 74     | 82.3   | 104   | 0.539084773 | 70.5    | 79.075   | 8.575   | 0.891558647 | 0.5428  | -1.117 |
| 162093_at   | 92.1   | 88.1  | 94     | 125    | 139.1  | 88     | 126.3  | 144.1 | 0.16578016  | 99.8    | 124.375  | 24.575  | 0.80241206  | 0.1754  | 1.236  |
| 162094_f_at | 207.4  | 251.3 | 258    | 243.6  | 374.3  | 262.7  | 336.2  | 215.7 | 0.209496672 | 240.075 | 297.225  | 57.15   | 0.807721423 | 0.1948  | 1.215  |
| 162095_f_at | 173.3  | 173.7 | 161.2  | 160.2  | 136.4  | 147.1  | 194.8  | 95.3  | 0.332300941 | 167.1   | 143.4    | 23.7    | 1.165271967 | 0.2629  | -1.202 |
| 162096_at   | 5.4    | 7     | 29     | 5.4    | 5      | 6      | 28.8   | 31    | 0.536121664 | 11.7    | 17.7     | 6       | 0.661016949 | 0.5766  | 1.456  |
| 162097_r_at | 59.9   | 162   | 79.6   | 145.9  | 118.4  | 104.1  | 95.8   | 128.2 | 0.993536669 | 111.85  | 111.625  | 0.225   | 1.002015677 | 0.7767  | -1.076 |
| 162098_i_at | 9.2    | 4.1   | 52.4   | 13.1   | 69.2   | 8.5    | 14.1   | 30.9  | 0.556837108 | 19.7    | 30.675   | 10.975  | 0.642216789 | 0.4457  | 1.774  |
| 162099_f_at | 62.2   | 47.3  | 54.3   | 37.3   | 21.2   | 66     | 37.5   | 51.2  | 0.590960852 | 50.275  | 43.975   | 6.3     | 1.143263218 | 0.4842  | -1.221 |
| 162100_r_at | 27.4   | 30.7  | 26.3   | 47.3   | 118.6  | 94.6   | 27.7   | 27.7  | 0.239023676 | 32.925  | 67.15    | 34.225  | 0.490320179 | 0.2487  | 1.694  |
| 162101_f_at | 1.9    | 3.4   | 3.4    | 1      | 6      | 9.5    | 2.6    | 0.8   | 0.323809666 | 2.425   | 4.725    | 2.3     | 0.513227513 | 0.5171  | 1.53   |
| 162102_r_at | 100.7  | 62.5  | 22.4   | 77.9   | 26.5   | 18.3   | 29.6   | 68.4  | 0.186923131 | 65.875  | 35.7     | 30.175  | 1.845238095 | 0.2114  | -1.828 |
| 162103_i_at | 8.1    | 18.8  | 25.1   | 22.3   | 15     | 19.9   | 15.8   | 8.4   | 0.428285567 | 18.575  | 14.775   | 3.8     | 1.257191201 | 0.5673  | -1.211 |
| 162104_f_at | 289.7  | 236.5 | 444.6  | 356.4  | 351.4  | 324.2  | 371.6  | 341   | 0.760121886 | 331.8   | 347.05   | 15.25   | 0.956058205 | 0.626   | -1.074 |
| 162105_r_at | 53.6   | 84.5  | 76.9   | 124.9  | 109.3  | 104    | 131.5  | 108.7 | 0.151863756 | 84.975  | 113.375  | 28.4    | 0.749503859 | 0.1192  | 1.39   |
| 162106_f_at | 54.9   | 22.3  | 83.4   | 55.1   | 53.8   | 56.6   | 71.5   | 74.9  | 0.490288419 | 53.925  | 64.2     | 10.275  | 0.839953271 | 0.395   | 1.305  |
| 162107_r_at | 17.4   | 0.8   | 17.2   | 18.5   | 3.7    | 15.5   | 0.8    | 26.5  | 0.808051569 | 13.475  | 11.625   | 1.85    | 1.159139785 | 0.7822  | -1.375 |
| 162108_f_at | 11.9   | 15.4  | 15.4   | 20     | 2.5    | 19.4   | 13.8   | 1.4   | 0.246859564 | 15.675  | 9.275    | 6.4     | 1.690026954 | 0.166   | -2.808 |
| 162109_f_at | 12.7   | 0.5   | 15.9   | 15.3   | 16.6   | 15.9   | 10.7   | 10.3  | 0.595566939 | 11.1    | 13.375   | 2.275   | 0.829906542 | 0.4213  | 2.123  |
| 162110_f_at | 23.6   | 9.6   | 6.1    | 7.3    | 58.5   | 5.3    | 9.4    | 46.7  | 0.2663151   | 11.65   | 29.975   | 18.325  | 0.388657214 | 0.3654  | 1.918  |
| 162111_r_at | 3      | 7.7   | 2.5    | 3.6    | 5      | 1.6    | 3.4    | 1.2   | 0.38252285  | 4.2     | 2.8      | 1.4     | 1.5         | 0.3063  | -1.592 |



|             |        |       |        |        |        |        |        |        |             |          |         |         |             |         |        |
|-------------|--------|-------|--------|--------|--------|--------|--------|--------|-------------|----------|---------|---------|-------------|---------|--------|
| 162112_i_at | 4.9    | 1.2   | 3.8    | 4.9    | 4.8    | 12.9   | 6.2    | 16.8   | 0.102233199 | 3.7      | 10.175  | 6.475   | 0.363636364 | 0.06312 | 2.757  |
| 162113_r_at | 28.9   | 5     | 15.6   | 14.4   | 19.7   | 42.1   | 6.7    | 61.7   | 0.275678792 | 15.975   | 32.55   | 16.575  | 0.49078341  | 0.3719  | 1.805  |
| 162114_f_at | 310    | 275.2 | 294    | 266.4  | 247.4  | 277.3  | 276.8  | 387.1  | 0.757711849 | 286.4    | 297.15  | 10.75   | 0.963822985 | 0.8236  | -1.024 |
| 162115_i_at | 33.3   | 29.3  | 6.2    | 51     | 45.4   | 34.5   | 23.7   | 30.4   | 0.745698199 | 29.95    | 33.5    | 3.55    | 0.894029851 | 0.5246  | 1.384  |
| 162116_r_at | 0.2    | 0.1   | 5.2    | 0.1    | 16.2   | 0.7    | 0.5    | 0.2    | 0.512162075 | 1.4      | 4.4     | 3       | 0.318181818 | 0.4776  | 2.725  |
| 162117_f_at | 25.1   | 8.9   | 3.2    | 37.3   | 3.4    | 8.3    | 4      | 7.3    | 0.195590032 | 18.625   | 5.75    | 12.875  | 3.239130435 | 0.1986  | -2.365 |
| 162118_f_at | 48.7   | 51    | 38.8   | 72.3   | 35.4   | 32.2   | 60.4   | 45.7   | 0.366383072 | 52.7     | 43.425  | 9.275   | 1.213586644 | 0.339   | -1.219 |
| 162119_r_at | 1      | 5.5   | 0.9    | 13.7   | 0.5    | 10.2   | 0.8    | 4.9    | 0.766337488 | 5.275    | 4.1     | 1.175   | 1.286585366 | 0.781   | -1.324 |
| 162120_at   | 2.9    | 10.4  | 1.8    | 1.9    | 2.4    | 1.3    | 1.6    | 10.5   | 0.92397062  | 4.25     | 3.95    | 0.3     | 1.075949367 | 0.7779  | -1.202 |
| 162121_at   | 10.1   | 7.5   | 3.3    | 3.7    | 5.6    | 4.5    | 19.6   | 23.6   | 0.239595063 | 6.15     | 13.325  | 7.175   | 0.461538462 | 0.253   | 1.883  |
| 162122_f_at | 243.9  | 244   | 230.7  | 322.5  | 321.7  | 212.4  | 256.9  | 343    | 0.55136185  | 260.275  | 283.5   | 23.225  | 0.918077601 | 0.5853  | -1.08  |
| 162123_f_at | 160.6  | 205.1 | 236.5  | 204.5  | 183.8  | 232.6  | 176.4  | 239.1  | 0.788914671 | 201.675  | 207.975 | 6.3     | 0.969707898 | 0.7925  | -1.031 |
| 162124_r_at | 21.1   | 29.2  | 17.3   | 11.2   | 24     | 9.8    | 3.5    | 18.9   | 0.378872569 | 19.7     | 14.05   | 5.65    | 1.402135231 | 0.3238  | -1.664 |
| 162125_f_at | 1216.9 | 2530  | 1593.9 | 1823.9 | 3145.4 | 1961.8 | 2539.7 | 2039.3 | 0.155796856 | 1791.175 | 2421.55 | 630.375 | 0.739681196 | 0.1403  | 1.375  |
| 162126_r_at | 9.9    | 7.7   | 0.9    | 10.2   | 8.5    | 7      | 16     | 18.6   | 0.186664516 | 7.175    | 12.525  | 5.35    | 0.572854291 | 0.2493  | 2.26   |
| 162127_r_at | 33.8   | 39.3  | 42.9   | 23.5   | 35.6   | 12.5   | 6.5    | 21.6   | 0.089700301 | 34.875   | 19.05   | 15.825  | 1.830708661 | 0.09581 | -2.156 |
| 162128_i_at | 51     | 24.6  | 19     | 7.8    | 26.1   | 40.8   | 4.8    | 15.5   | 0.761658075 | 25.6     | 21.8    | 3.8     | 1.174311927 | 0.7313  | -1.243 |
| 162129_f_at | 26     | 9.3   | 13.8   | 18.6   | 25.7   | 21.3   | 50     | 38.6   | 0.074653704 | 16.925   | 33.9    | 16.975  | 0.499262537 | 0.05136 | 2.035  |
| 162130_r_at | 13.8   | 5.2   | 9.8    | 12.8   | 7      | 2.1    | 13.7   | 2.9    | 0.27519417  | 10.4     | 6.425   | 3.975   | 1.618677043 | 0.2057  | -1.965 |
| 162131_f_at | 140.8  | 103.4 | 132.9  | 192    | 180.5  | 136.1  | 141.8  | 165.3  | 0.548379235 | 142.275  | 155.925 | 13.65   | 0.912457912 | 0.4725  | 1.116  |
| 162132_f_at | 14.6   | 74.7  | 36.2   | 54.1   | 32     | 30     | 29.9   | 41.4   | 0.436695764 | 44.9     | 33.325  | 11.575  | 1.347336834 | 0.6987  | -1.158 |
| 162133_at   | 177    | 258.4 | 215.9  | 207.9  | 226    | 211.1  | 182.8  | 209.5  | 0.713009525 | 214.8    | 207.35  | 7.45    | 1.035929588 | 0.7556  | -1.03  |
| 162134_r_at | 593.7  | 498   | 522.7  | 584.5  | 954.1  | 528.6  | 723.9  | 665.4  | 0.152663733 | 549.725  | 718     | 168.275 | 0.765633705 | 0.1041  | 1.281  |
| 162135_r_at | 0.5    | 1.2   | 4.6    | 0.3    | 14.6   | 7.3    | 1.7    | 6      | 0.118275011 | 1.65     | 7.4     | 5.75    | 0.222972973 | 0.05403 | 5.806  |
| 162136_r_at | 39.6   | 42.5  | 7.4    | 31.6   | 13.9   | 27.9   | 35.2   | 37.2   | 0.863546623 | 30.275   | 28.55   | 1.725   | 1.060420315 | 0.897   | -1.065 |
| 162137_f_at | 20.9   | 5.7   | 12.2   | 13.4   | 6.1    | 18.4   | 13.4   | 11.2   | 0.853961555 | 13.05    | 12.275  | 0.775   | 1.063136456 | 0.9193  | -1.039 |
| 162138_s_at | 512.7  | 957.2 | 707.8  | 760.4  | 1145.1 | 872.4  | 1163.1 | 1025.2 | 0.034349887 | 734.525  | 1051.45 | 316.925 | 0.698582909 | 0.04088 | 1.457  |
| 162139_r_at | 29.7   | 34.5  | 41.5   | 32.1   | 14.9   | 12.3   | 33.9   | 33.9   | 0.168963486 | 34.45    | 23.75   | 10.7    | 1.450526316 | 0.1431  | -1.597 |
| 162140_i_at | 24.7   | 50.6  | 34.2   | 30.3   | 29.8   | 7.9    | 27.7   | 40.1   | 0.365369406 | 34.95    | 26.375  | 8.575   | 1.325118483 | 0.3432  | -1.495 |
| 162141_r_at | 5      | 3.4   | 1.1    | 6.6    | 14.6   | 3.8    | 1.9    | 1.5    | 0.689513589 | 4.025    | 5.45    | 1.425   | 0.73853211  | 0.928   | -1.063 |
| 162142_f_at | 98.9   | 88.3  | 108.4  | 63.9   | 149.9  | 73.8   | 122.4  | 27.8   | 0.906328056 | 89.875   | 93.475  | 3.6     | 0.961487029 | 0.7732  | -1.126 |
| 162143_f_at | 64.7   | 97.4  | 69.6   | 126    | 59     | 82.8   | 50.6   | 154.9  | 0.928683904 | 89.425   | 86.825  | 2.6     | 1.029945292 | 0.7647  | -1.096 |
| 162144_at   | 119.2  | 103   | 105.7  | 127.5  | 147.8  | 99.2   | 91.8   | 146.2  | 0.668897492 | 113.85   | 121.25  | 7.4     | 0.938969072 | 0.7616  | -1.044 |
| 162145_r_at | 10.7   | 73.9  | 19.2   | 70.4   | 169.8  | 59.7   | 19     | 104    | 0.280117335 | 43.55    | 88.125  | 44.575  | 0.494184397 | 0.3182  | 2.08   |
| 162146_r_at | 25.2   | 1.5   | 1.4    | 1.3    | 1.5    | 1.8    | 1      | 1.9    | 0.401656595 | 7.35     | 1.55    | 5.8     | 4.741935484 | 0.4061  | -1.931 |
| 162147_f_at | 41.8   | 156.5 | 157.4  | 163.3  | 134.4  | 150    | 37.1   | 44.6   | 0.393558825 | 129.75   | 91.525  | 38.225  | 1.417645452 | 0.444   | -1.499 |
| 162148_r_at | 4.1    | 15.2  | 7.7    | 4.1    | 8.3    | 5      | 19     | 16.9   | 0.331049131 | 7.775    | 12.3    | 4.525   | 0.632113821 | 0.3214  | 1.613  |
| 162149_i_at | 4.7    | 26.1  | 21.6   | 13.3   | 65.2   | 17.6   | 14.1   | 28.7   | 0.301301404 | 16.425   | 31.4    | 14.975  | 0.523089172 | 0.2548  | 1.906  |
| 162150_r_at | 125.9  | 115   | 168.3  | 149.6  | 159.6  | 129.8  | 152.7  | 200.9  | 0.313175232 | 139.7    | 160.75  | 21.05   | 0.869051322 | 0.3061  | 1.149  |
| 162151_i_at | 3.6    | 4.5   | 3.8    | 3.3    | 13.9   | 7.1    | 2.2    | 2.5    | 0.408259536 | 3.8      | 6.425   | 2.625   | 0.591439689 | 0.5915  | 1.286  |
| 162152_r_at | 17.7   | 25.3  | 67.2   | 24.8   | 7.1    | 12.1   | 28.8   | 37.6   | 0.39662714  | 33.75    | 21.4    | 12.35   | 1.577102804 | 0.3206  | -1.684 |
| 162153_i_at | 917.4  | 882.5 | 926.2  | 897.7  | 1167.3 | 906.9  | 984.7  | 832.6  | 0.42198016  | 905.95   | 972.875 | 66.925  | 0.931209045 | 0.4168  | -1.066 |
| 162154_i_at | 8.7    | 7.4   | 6.6    | 11.2   | 9.2    | 7.6    | 11     | 12.7   | 0.311990409 | 8.475    | 10.125  | 1.65    | 0.837037037 | 0.3145  | 1.191  |
| 162155_f_at | 5.2    | 5.5   | 15.3   | 15.9   | 23.7   | 7      | 20.4   | 4.5    | 0.569091613 | 10.475   | 13.9    | 3.425   | 0.753597122 | 0.7166  | 1.214  |
| 162156_f_at | 10.8   | 2.7   | 2.6    | 24.1   | 12.2   | 6.9    | 4.2    | 3.7    | 0.576808334 | 10.05    | 6.75    | 3.3     | 1.488888889 | 0.9006  | -1.083 |
| 162157_f_at | 49.5   | 56.6  | 8.2    | 12     | 79.9   | 56.3   | 79.4   | 39.5   | 0.091695099 | 31.575   | 63.775  | 32.2    | 0.495099961 | 0.1065  | 2.674  |
| 162158_r_at | 18.7   | 2.3   | 1.5    | 7      | 1.7    | 11.1   | 11.2   | 2.7    | 0.888116518 | 7.375    | 6.675   | 0.7     | 1.104868914 | 0.9428  | -1.057 |
| 162159_i_at | 45.3   | 109.2 | 55.9   | 110.3  | 26.1   | 104.6  | 53.5   | 112.3  | 0.829654501 | 80.175   | 74.125  | 6.05    | 1.081618887 | 0.7184  | -1.168 |
| 162160_at   | 64.3   | 46.9  | 61.6   | 78.3   | 67.4   | 67.8   | 82     | 64.7   | 0.353624053 | 62.775   | 70.475  | 7.7     | 0.890741398 | 0.3235  | 1.136  |
| 162161_r_at | 9.5    | 35.6  | 10     | 22.9   | 34.4   | 40.4   | 54.7   | 36.8   | 0.03126852  | 19.5     | 41.575  | 22.075  | 0.46903187  | 0.03848 | 2.451  |
| 162162_f_at | 4.7    | 20    | 4.6    | 3.9    | 4.1    | 2.3    | 3.8    | 3      | 0.290734322 | 8.3      | 3.3     | 5       | 2.515151515 | 0.1356  | -2.004 |
| 162163_at   | 28.8   | 16.6  | 95.2   | 18.9   | 62     | 109.1  | 57.8   | 70.1   | 0.173392638 | 39.875   | 74.75   | 34.875  | 0.533444816 | 0.08656 | 2.374  |
| 162164_f_at | 80.4   | 103.2 | 119.3  | 98.3   | 102.4  | 94     | 75.8   | 161.1  | 0.709801384 | 100.3    | 108.325 | 8.025   | 0.925917378 | 0.8008  | -1.048 |
| 162165_f_at | 442.9  | 436.3 | 507.9  | 433.2  | 391.4  | 511.3  | 384.5  | 523    | 0.954093774 | 455.075  | 452.55  | 2.525   | 1.005579494 | 0.885   | -1.014 |
| 162166_f_at | 24.4   | 7.9   | 59.2   | 13.8   | 46.4   | 13.2   | 14.3   | 35.4   | 0.945930516 | 26.325   | 27.325  | 1       | 0.963403477 | 0.7568  | 1.189  |
| 162167_f_at | 25.6   | 34.9  | 52.3   | 22.2   | 20.1   | 18.6   | 15.8   | 20.8   | 0.112216281 | 33.75    | 18.825  | 14.925  | 1.792828685 | 0.03617 | -1.707 |



|             |       |       |       |       |       |       |       |       |             |         |         |        |             |         |        |
|-------------|-------|-------|-------|-------|-------|-------|-------|-------|-------------|---------|---------|--------|-------------|---------|--------|
| 162168_r_at | 65.3  | 75.7  | 66.1  | 101   | 154.2 | 90.6  | 152.7 | 73.7  | 0.145047239 | 77.025  | 117.8   | 40.775 | 0.653862479 | 0.1158  | 1.477  |
| 162169_r_at | 235.8 | 282.9 | 255.5 | 277.2 | 342.7 | 219.4 | 247.7 | 282.6 | 0.738851443 | 262.85  | 273.1   | 10.25  | 0.96246796  | 0.8033  | -1.027 |
| 162170_r_at | 2.1   | 1.5   | 3.8   | 17.3  | 2.7   | 1.8   | 2.3   | 15.8  | 0.92056987  | 6.175   | 5.65    | 0.525  | 1.092920354 | 0.9531  | -1.046 |
| 162171_f_at | 45.6  | 49.8  | 38.6  | 39.1  | 78.1  | 65.2  | 54.1  | 28.8  | 0.297723511 | 43.275  | 56.55   | 13.275 | 0.765251989 | 0.3866  | 1.235  |
| 162172_f_at | 113.6 | 121.6 | 110.8 | 29.6  | 153.9 | 129.8 | 103   | 24.6  | 0.80986332  | 93.9    | 102.825 | 8.925  | 0.913202042 | 0.9609  | -1.028 |
| 162173_i_at | 3.5   | 13.4  | 2.8   | 4.5   | 10.5  | 1.5   | 5.6   | 9.5   | 0.82929499  | 6.05    | 6.775   | 0.725  | 0.89298893  | 0.8773  | -1.095 |
| 162174_at   | 67.8  | 14    | 89.8  | 62.3  | 41.2  | 55    | 63.6  | 25.5  | 0.532961619 | 58.475  | 46.325  | 12.15  | 1.262277388 | 0.8474  | -1.098 |
| 162175_at   | 1.9   | 2.5   | 3.8   | 2.8   | 11.4  | 5.4   | 6.7   | 3.4   | 0.098512464 | 2.75    | 6.725   | 3.975  | 0.408921933 | 0.02819 | 2.293  |
| 162176_r_at | 208.9 | 218.3 | 189.6 | 216.5 | 240.5 | 187.1 | 181.9 | 303.2 | 0.539045226 | 208.325 | 228.175 | 19.85  | 0.913005369 | 0.5913  | -1.073 |
| 162177_f_at | 277.8 | 250.8 | 262.3 | 310.9 | 300   | 293.4 | 315.6 | 268.1 | 0.296985305 | 275.45  | 294.275 | 18.825 | 0.936029224 | 0.2846  | -1.07  |
| 162178_r_at | 445.7 | 491.6 | 727.1 | 582.1 | 687.9 | 552.8 | 418.2 | 473.8 | 0.749982444 | 561.625 | 533.175 | 28.45  | 1.053359591 | 0.7437  | -1.053 |
| 162179_r_at | 17.3  | 18.6  | 13.5  | 9.2   | 6.7   | 19.4  | 35.4  | 21    | 0.395772262 | 14.65   | 20.625  | 5.975  | 0.71030303  | 0.581   | 1.25   |
| 162180_r_at | 42    | 62.9  | 42.8  | 66.6  | 51.4  | 64.3  | 72.6  | 72.9  | 0.206845933 | 53.575  | 65.3    | 11.725 | 0.820444104 | 0.2041  | 1.234  |
| 162181_f_at | 13.3  | 3.2   | 3.9   | 13.1  | 7.9   | 10.8  | 26.2  | 15.2  | 0.228355578 | 8.375   | 15.025  | 6.65   | 0.557404326 | 0.187   | 1.983  |
| 162182_f_at | 103.7 | 87.8  | 41.2  | 82.3  | 94.3  | 31.8  | 34    | 118.1 | 0.732786298 | 78.75   | 69.55   | 9.2    | 1.132278936 | 0.5733  | -1.266 |
| 162183_at   | 6.2   | 5.9   | 39.1  | 16.1  | 13.4  | 11.2  | 9.9   | 26.7  | 0.868655408 | 16.825  | 15.3    | 1.525  | 1.099673203 | 0.7958  | 1.145  |
| 162184_at   | 17.9  | 7.9   | 2.7   | 10.4  | 5.8   | 5.1   | 25    | 11.8  | 0.709234433 | 9.725   | 11.925  | 2.2    | 0.815513627 | 0.7255  | 1.221  |
| 162185_i_at | 12.9  | 2.1   | 8.7   | 30.8  | 4.2   | 9.9   | 6.7   | 9.4   | 0.399318309 | 13.625  | 7.55    | 6.075  | 1.804635762 | 0.6836  | -1.29  |
| 162186_r_at | 23.2  | 53.8  | 55.9  | 21.6  | 102.1 | 63.6  | 32.3  | 24.4  | 0.438173955 | 38.625  | 55.6    | 16.975 | 0.694694245 | 0.4903  | 1.357  |
| 162187_f_at | 4.8   | 2     | 17.3  | 4     | 2.7   | 3.8   | 5     | 5.3   | 0.478615315 | 7.025   | 4.2     | 2.825  | 1.672619048 | 0.655   | -1.251 |
| 162188_f_at | 249.1 | 300.9 | 276.8 | 297.4 | 370.6 | 286.9 | 311.1 | 303.7 | 0.147830061 | 281.05  | 318.075 | 37.025 | 0.883596636 | 0.1332  | 1.13   |
| 162189_r_at | 135.9 | 111.9 | 176.4 | 207.2 | 246.4 | 149.4 | 161.2 | 202   | 0.336201352 | 157.85  | 189.75  | 31.9   | 0.831884058 | 0.3208  | 1.212  |
| 162190_r_at | 36.4  | 35.6  | 50.8  | 17    | 128.3 | 81.1  | 149.5 | 21    | 0.123561738 | 34.95   | 94.975  | 60.025 | 0.367991577 | 0.1445  | 2.325  |
| 162191_at   | 14    | 6.6   | 1.8   | 6.9   | 16.6  | 1.3   | 1.5   | 8.4   | 0.935223058 | 7.325   | 6.95    | 0.375  | 1.053956835 | 0.6494  | -1.439 |
| 162192_f_at | 8.7   | 10.9  | 15.6  | 11.5  | 11.6  | 9.4   | 13    | 9.1   | 0.621257204 | 11.675  | 10.775  | 0.9    | 1.083526682 | 0.6601  | -1.07  |
| 162193_f_at | 9.7   | 6     | 55    | 30    | 71.8  | 13.2  | 6.3   | 11.3  | 0.981055328 | 25.175  | 25.65   | 0.475  | 0.981481481 | 0.906   | -1.094 |
| 162194_r_at | 14.6  | 9.1   | 3.5   | 13.7  | 20.3  | 17.4  | 23.5  | 13    | 0.049789463 | 10.225  | 18.55   | 8.325  | 0.551212938 | 0.09266 | 2.036  |
| 162195_i_at | 29.6  | 23.5  | 5.1   | 36.6  | 6.2   | 7.8   | 2.8   | 44.4  | 0.50867885  | 23.7    | 15.3    | 8.4    | 1.549019608 | 0.3381  | -2.144 |
| 162196_f_at | 7     | 5.6   | 5.6   | 4.9   | 6.7   | 6.9   | 6.1   | 5.3   | 0.436607012 | 5.775   | 6.25    | 0.475  | 0.924       | 0.3985  | -1.088 |
| 162197_at   | 4.5   | 2.5   | 4.2   | 3.8   | 5.6   | 5.2   | 6.7   | 3.2   | 0.156656904 | 3.75    | 5.175   | 1.425  | 0.724637681 | 0.1744  | 1.375  |
| 162198_f_at | 40.5  | 68.4  | 51.8  | 28.9  | 49.9  | 53.1  | 61.6  | 42.2  | 0.667117239 | 47.4    | 51.7    | 4.3    | 0.916827853 | 0.5476  | 1.135  |
| 162199_r_at | 35.5  | 31.6  | 17.4  | 30.2  | 33.9  | 16.7  | 59    | 30.8  | 0.540206223 | 28.675  | 35.1    | 6.425  | 0.816951567 | 0.6604  | 1.15   |
| 162200_r_at | 0.6   | 4.7   | 0.6   | 0.5   | 0.8   | 0.7   | 1     | 5.1   | 0.846746859 | 1.6     | 1.9     | 0.3    | 0.842105263 | 0.6777  | 1.357  |
| 162201_r_at | 51.2  | 52.8  | 77.3  | 62.4  | 82.3  | 63.5  | 69.6  | 80.8  | 0.134587806 | 60.925  | 74.05   | 13.125 | 0.822754895 | 0.1222  | 1.226  |
| 162202_f_at | 189.1 | 145.5 | 153.5 | 148.6 | 137.6 | 117.8 | 118.8 | 114.4 | 0.026377345 | 159.175 | 122.15  | 37.025 | 1.303110929 | 0.01165 | -1.299 |
| 162203_r_at | 1.3   | 2.3   | 2.1   | 1.5   | 2.6   | 1.4   | 1.7   | 20.7  | 0.383087785 | 1.8     | 6.6     | 4.8    | 0.272727273 | 0.3379  | 1.926  |
| 162204_r_at | 34.2  | 78.1  | 68    | 97.9  | 95.6  | 57.8  | 101.7 | 124.6 | 0.23501015  | 69.55   | 94.925  | 25.375 | 0.732683698 | 0.2662  | 1.408  |
| 162205_f_at | 242.4 | 222.2 | 289.2 | 203.2 | 183.7 | 236.9 | 241.7 | 292.2 | 0.983446493 | 239.25  | 238.625 | 0.625  | 1.002619172 | 0.9541  | -1.007 |
| 162206_f_at | 161.4 | 200.1 | 168.8 | 163.2 | 189.9 | 190.6 | 200.4 | 238   | 0.076311025 | 173.375 | 204.725 | 31.35  | 0.846867749 | 0.0635  | 1.18   |
| 162207_f_at | 13.5  | 55.1  | 30.9  | 23.5  | 100.7 | 14.9  | 62.7  | 19.6  | 0.442173044 | 30.75   | 49.475  | 18.725 | 0.621526023 | 0.5936  | 1.358  |
| 162208_f_at | 15    | 29.6  | 3.8   | 7     | 5.9   | 12.5  | 9.9   | 22.6  | 0.874462972 | 13.85   | 12.725  | 1.125  | 1.088408644 | 0.8727  | -1.092 |
| 162209_r_at | 1.1   | 1     | 1.3   | 1.7   | 0.9   | 0.9   | 1.6   | 6.4   | 0.442313241 | 1.275   | 2.45    | 1.175  | 0.520408163 | 0.5537  | 1.348  |
| 162210_r_at | 4.4   | 1.5   | 3     | 4     | 2.3   | 2.1   | 3.6   | 2.1   | 0.390254447 | 3.225   | 2.525   | 0.7    | 1.277227723 | 0.5372  | -1.202 |
| 162211_r_at | 4.2   | 3.7   | 47.6  | 54    | 34.3  | 6.5   | 4.5   | 6.6   | 0.395208797 | 27.375  | 12.975  | 14.4   | 2.10982659  | 0.6272  | -1.559 |
| 162212_at   | 3.8   | 2.4   | 2.6   | 6.7   | 22.5  | 4     | 3.7   | 8.8   | 0.276762553 | 3.875   | 9.75    | 5.875  | 0.397435897 | 0.1816  | 2.069  |
| 162213_i_at | 102.8 | 86.4  | 89.3  | 109.4 | 45.2  | 68.4  | 81    | 99.7  | 0.133587532 | 96.975  | 73.575  | 23.4   | 1.318042813 | 0.1291  | -1.365 |
| 162214_r_at | 17    | 26.1  | 38.8  | 20.9  | 42    | 16.5  | 39.8  | 18.1  | 0.698729714 | 25.7    | 29.1    | 3.4    | 0.883161512 | 0.7969  | -1.086 |
| 162215_f_at | 3.4   | 18.9  | 7.9   | 21.3  | 2.3   | 11.7  | 18.1  | 8.2   | 0.625236853 | 12.875  | 10.075  | 2.8    | 1.277915633 | 0.6956  | -1.289 |
| 162216_i_at | 10.8  | 7.1   | 10.5  | 6.6   | 7.6   | 8.2   | 13.2  | 7.8   | 0.804348986 | 8.75    | 9.2     | 0.45   | 0.951086957 | 0.8159  | -1.045 |
| 162217_r_at | 1.4   | 16.6  | 17.5  | 6.1   | 38.9  | 14.2  | 7.3   | 5     | 0.528755083 | 10.4    | 16.35   | 5.95   | 0.636085627 | 0.5099  | 1.676  |
| 162218_f_at | 166   | 152.6 | 164.4 | 235.8 | 124.1 | 135   | 131.2 | 141.6 | 0.088002085 | 179.7   | 132.975 | 46.725 | 1.351381839 | 0.02974 | -1.333 |
| 162219_f_at | 93.2  | 125.1 | 132.9 | 124.6 | 184.6 | 135.4 | 174.2 | 159.6 | 0.019069844 | 118.95  | 163.45  | 44.5   | 0.727745488 | 0.02206 | 1.377  |
| 162220_r_at | 58.5  | 24.8  | 95.8  | 53.8  | 67.8  | 61.5  | 46.2  | 53.4  | 0.951386802 | 58.225  | 57.225  | 1      | 1.01747488  | 0.7928  | -1.083 |
| 162221_i_at | 113.8 | 92.6  | 110.9 | 111   | 86.7  | 76.6  | 73.3  | 103.6 | 0.042874799 | 107.075 | 85.05   | 22.025 | 1.258965315 | 0.04084 | -1.267 |
| 162222_r_at | 7.7   | 3.8   | 5.8   | 7.8   | 6.1   | 13.7  | 12.6  | 7.8   | 0.133863495 | 6.275   | 10.05   | 3.775  | 0.624378109 | 0.1241  | 1.587  |
| 162223_f_at | 5.9   | 6     | 9.1   | 10.4  | 9.9   | 26.3  | 11    | 7.5   | 0.268755979 | 7.85    | 13.675  | 5.825  | 0.574040219 | 0.1805  | 1.596  |



|             |        |        |        |        |        |        |        |        |             |          |          |        |             |          |        |
|-------------|--------|--------|--------|--------|--------|--------|--------|--------|-------------|----------|----------|--------|-------------|----------|--------|
| 162224_r_at | 15.7   | 42.4   | 36.7   | 43.6   | 34.2   | 24.1   | 11.3   | 52.6   | 0.723040784 | 34.6     | 30.55    | 4.05   | 1.132569558 | 0.6519   | -1.212 |
| 162225_f_at | 85.6   | 45.6   | 102.8  | 132    | 89.2   | 68.3   | 94.1   | 135.7  | 0.824385874 | 91.5     | 96.825   | 5.325  | 0.945003873 | 0.7308   | -1.101 |
| 162226_r_at | 77.6   | 81.8   | 88.4   | 93.3   | 125.5  | 80     | 74.8   | 95.2   | 0.515015878 | 85.275   | 93.875   | 8.6    | 0.908388815 | 0.5493   | -1.081 |
| 162227_r_at | 595.3  | 507.5  | 667.3  | 554    | 505.3  | 572    | 637.8  | 632.7  | 0.901676619 | 581.025  | 586.95   | 5.925  | 0.989905443 | 0.8966   | -1.011 |
| 162228_f_at | 60.9   | 86.5   | 107.5  | 87.1   | 139.3  | 83     | 117    | 96.2   | 0.187343743 | 85.5     | 108.875  | 23.375 | 0.785304248 | 0.1885   | 1.274  |
| 162229_at   | 10.8   | 11.6   | 9.9    | 10.8   | 13.6   | 11.8   | 12.2   | 10.4   | 0.166457511 | 10.775   | 12       | 1.225  | 0.897916667 | 0.1553   | -1.11  |
| 162230_r_at | 2.1    | 2.5    | 2.4    | 1      | 6.5    | 1.2    | 2.8    | 3.3    | 0.288007754 | 2        | 3.45     | 1.45   | 0.579710145 | 0.33     | 1.525  |
| 162231_r_at | 8.8    | 8      | 11.4   | 29.7   | 8.9    | 22.8   | 28.9   | 50.8   | 0.244968242 | 14.475   | 27.85    | 13.375 | 0.519748654 | 0.2295   | 1.88   |
| 162232_r_at | 1.5    | 7.6    | 1.3    | 1.1    | 1.4    | 1.3    | 5.1    | 22.9   | 0.429093023 | 2.875    | 7.675    | 4.8    | 0.374592834 | 0.4713   | 1.864  |
| 162233_r_at | 12.8   | 1.2    | 9.8    | 14.8   | 13     | 6.3    | 19.1   | 15.7   | 0.375209593 | 9.65     | 13.525   | 3.875  | 0.71349353  | 0.3833   | 1.804  |
| 162234_f_at | 115.2  | 154.2  | 138.1  | 138.4  | 138.3  | 162.2  | 158.4  | 245.9  | 0.195387058 | 136.475  | 176.2    | 39.725 | 0.77454597  | 0.1385   | 1.266  |
| 162235_f_at | 142.4  | 66.7   | 91.8   | 71.8   | 112.6  | 97     | 187.2  | 78.3   | 0.421373293 | 93.175   | 118.775  | 25.6   | 0.784466428 | 0.3879   | 1.265  |
| 162236_f_at | 270.6  | 339.2  | 244.3  | 357.8  | 432.8  | 235.5  | 331.2  | 382.7  | 0.433366428 | 302.975  | 345.55   | 42.575 | 0.876790624 | 0.4844   | 1.126  |
| 162237_f_at | 10.1   | 29.2   | 24     | 13.8   | 27     | 34.7   | 36.5   | 18.5   | 0.152605969 | 19.275   | 29.175   | 9.9    | 0.66066838  | 0.1584   | 1.596  |
| 162238_r_at | 50.4   | 99.1   | 71.4   | 193.6  | 81.5   | 68     | 190.1  | 157.7  | 0.649142188 | 103.625  | 124.325  | 20.7   | 0.833500905 | 0.5843   | 1.245  |
| 162239_at   | 3.7    | 2.9    | 5.5    | 6.3    | 5.3    | 4.7    | 7.6    | 4      | 0.496995796 | 4.6      | 5.4      | 0.8    | 0.851851852 | 0.4677   | 1.19   |
| 162240_r_at | 13.4   | 0.5    | 1.7    | 1.5    | 2.7    | 2.6    | 20.1   | 15.6   | 0.318208178 | 4.275    | 10.25    | 5.975  | 0.417073171 | 0.2203   | 3.282  |
| 162241_r_at | 2.5    | 1.3    | 7.6    | 16.7   | 15.4   | 1.8    | 1.4    | 6.1    | 0.864756506 | 7.025    | 6.175    | 0.85   | 1.137651822 | 0.8646   | -1.152 |
| 162242_at   | 9.7    | 9      | 2.5    | 29.4   | 5.2    | 9      | 5.5    | 12.6   | 0.497998153 | 12.65    | 8.075    | 4.575  | 1.566563467 | 0.764    | -1.187 |
| 162243_f_at | 111.8  | 153.2  | 96.5   | 93.8   | 86.7   | 86.6   | 127.8  | 118.2  | 0.62409828  | 113.825  | 104.825  | 9      | 1.085857381 | 0.6242   | -1.082 |
| 162244_r_at | 10     | 23.2   | 15.5   | 27.3   | 43.7   | 28.3   | 41.8   | 33.3   | 0.015434222 | 19       | 36.775   | 17.775 | 0.516655337 | 0.0275   | 2.048  |
| 162245_f_at | 220.7  | 220.1  | 258    | 236.4  | 239.2  | 238.1  | 217.7  | 441.6  | 0.41236486  | 233.8    | 284.15   | 50.35  | 0.822804857 | 0.394    | 1.166  |
| 162246_r_at | 109.2  | 132.7  | 203.6  | 122.3  | 162.8  | 114    | 207.8  | 140    | 0.641860864 | 141.95   | 156.15   | 14.2   | 0.9090618   | 0.6071   | -1.106 |
| 162247_r_at | 213.2  | 238.3  | 311.3  | 216.3  | 287    | 225.6  | 328.5  | 259.5  | 0.373256445 | 244.775  | 275.15   | 30.375 | 0.88960567  | 0.3506   | 1.127  |
| 162248_f_at | 117.1  | 133.3  | 145.8  | 112.4  | 121.2  | 201.5  | 127.2  | 142    | 0.354284753 | 127.15   | 147.975  | 20.825 | 0.859266768 | 0.3323   | 1.146  |
| 162249_f_at | 80.1   | 137    | 123.2  | 100.9  | 88.8   | 116.9  | 99.9   | 75.7   | 0.368582757 | 110.3    | 95.325   | 14.975 | 1.157094152 | 0.3907   | -1.149 |
| 162250_f_at | 90.4   | 90.6   | 82.7   | 118.2  | 148.1  | 87.6   | 131.1  | 94.3   | 0.288068793 | 95.475   | 115.275  | 19.8   | 0.828236825 | 0.2859   | 1.19   |
| 162251_f_at | 210.7  | 203    | 212.4  | 214.3  | 219.2  | 208.3  | 280.3  | 159.2  | 0.807181943 | 210.1    | 216.75   | 6.65   | 0.969319493 | 0.926    | -1.011 |
| 162252_f_at | 57.9   | 64.3   | 61.9   | 80.6   | 118.1  | 63.4   | 44     | 123.5  | 0.370159079 | 66.175   | 87.25    | 21.075 | 0.758452722 | 0.4811   | 1.216  |
| 162253_i_at | 137.3  | 127.2  | 191.2  | 99.1   | 186.2  | 110.9  | 143.3  | 156.3  | 0.68806875  | 138.7    | 149.175  | 10.475 | 0.929780459 | 0.6465   | -1.087 |
| 162254_f_at | 4.6    | 5.6    | 25.2   | 28.9   | 20.2   | 6.2    | 55.4   | 13.3   | 0.570218358 | 16.075   | 23.775   | 7.7    | 0.676130389 | 0.5706   | 1.49   |
| 162255_s_at | 6.1    | 6.6    | 1.5    | 3.5    | 3.6    | 3.6    | 3.7    | 6.8    | 1           | 4.425    | 4.425    | 0      | 1           | 0.7671   | 1.123  |
| 162256_r_at | 549.5  | 399.6  | 432.6  | 452.7  | 603.1  | 387.8  | 662.6  | 556.5  | 0.225757637 | 458.6    | 552.5    | 93.9   | 0.830045249 | 0.2459   | 1.19   |
| 162257_i_at | 7.1    | 6.1    | 17.8   | 12     | 9.6    | 8.1    | 7.6    | 15.4   | 0.865169376 | 10.75    | 10.175   | 0.575  | 1.056511057 | 0.982    | -1.007 |
| 162258_f_at | 12.1   | 10.7   | 43.2   | 13.3   | 40.5   | 57.3   | 13.9   | 40.2   | 0.178636732 | 19.825   | 37.975   | 18.15  | 0.522053983 | 0.1606   | 2.041  |
| 162259_f_at | 5.9    | 5.7    | 4.6    | 6.5    | 4.3    | 7.1    | 7.9    | 4.8    | 0.73281568  | 5.675    | 6.025    | 0.35   | 0.941908714 | 0.8237   | -1.039 |
| 162260_at   | 96.2   | 124.1  | 123.4  | 114.4  | 171.3  | 105.3  | 144.5  | 122.5  | 0.241377017 | 114.525  | 135.9    | 21.375 | 0.842715232 | 0.2344   | 1.173  |
| 162261_f_at | 64.6   | 59.7   | 107.2  | 119.6  | 63.5   | 78.8   | 113.2  | 119.7  | 0.775874266 | 87.775   | 93.8     | 6.025  | 0.935767591 | 0.7458   | -1.082 |
| 162262_f_at | 257.9  | 277    | 235.2  | 262.2  | 293.6  | 244.8  | 274.6  | 299    | 0.237194549 | 258.075  | 278      | 19.925 | 0.928327338 | 0.2442   | -1.076 |
| 162263_f_at | 1027.4 | 1282.9 | 1106.3 | 1262.5 | 1403.2 | 1171.3 | 1291.6 | 1254.8 | 0.210560491 | 1169.775 | 1280.225 | 110.45 | 0.913726103 | 0.2065   | -1.097 |
| 162264_s_at | 205.7  | 108.3  | 167.1  | 154.7  | 68     | 122.2  | 37.3   | 72.6   | 0.02038393  | 158.95   | 75.025   | 83.925 | 2.118627124 | 0.02597  | -2.242 |
| 162265_r_at | 39.1   | 55.9   | 47.8   | 16.2   | 82     | 51.5   | 44.2   | 63.4   | 0.135250559 | 39.75    | 60.275   | 20.525 | 0.659477395 | 0.1648   | 1.625  |
| 162266_f_at | 36.4   | 34.3   | 25.2   | 27.9   | 5.4    | 31.7   | 23.4   | 21.9   | 0.160096744 | 30.95    | 20.6     | 10.35  | 1.502427184 | 0.2042   | -1.781 |
| 162267_r_at | 18     | 57.3   | 104    | 121.7  | 104.1  | 18.9   | 43.9   | 69.9   | 0.609303106 | 75.25    | 59.2     | 16.05  | 1.271114865 | 0.7469   | -1.212 |
| 162268_at   | 15.5   | 31.5   | 27.6   | 17.3   | 34.6   | 25.9   | 24.3   | 48.4   | 0.182713281 | 22.975   | 33.3     | 10.325 | 0.68993994  | 0.1587   | 1.458  |
| 162269_at   | 138.3  | 160.5  | 172    | 107.2  | 214.8  | 109.9  | 192.7  | 166.9  | 0.36544562  | 144.5    | 171.075  | 26.575 | 0.844658775 | 0.4247   | 1.167  |
| 162270_r_at | 9.4    | 65.5   | 15.7   | 43.6   | 52.3   | 11.9   | 18.7   | 21.8   | 0.658578266 | 33.55    | 26.175   | 7.375  | 1.281757402 | 0.8231   | -1.136 |
| 162271_f_at | 8.2    | 30.6   | 40.8   | 17.7   | 12     | 20.5   | 20.8   | 70.1   | 0.684158591 | 24.325   | 30.85    | 6.525  | 0.788492707 | 0.7515   | 1.186  |
| 162272_r_at | 124.1  | 107.3  | 162.2  | 183.6  | 185.5  | 166.9  | 151.4  | 178.6  | 0.236452873 | 144.3    | 170.6    | 26.3   | 0.845838218 | 0.2016   | 1.206  |
| 162273_at   | 54.5   | 117.6  | 108.3  | 97.9   | 146.3  | 96.4   | 89.3   | 84.1   | 0.65310256  | 94.575   | 104.025  | 9.45   | 0.909156453 | 0.6238   | 1.117  |
| 162274_f_at | 42.5   | 124.6  | 45.8   | 88.9   | 144.7  | 126.6  | 163.3  | 97.5   | 0.057655227 | 75.45    | 133.025  | 57.575 | 0.567186619 | 0.06121  | 1.917  |
| 162275_f_at | 170.3  | 156    | 134.5  | 217.3  | 128.3  | 134.2  | 157.7  | 290.6  | 0.854713077 | 169.525  | 177.7    | 8.175  | 0.953995498 | 0.9864   | -1.004 |
| 162276_i_at | 69.7   | 110.9  | 78.9   | 114.1  | 50.7   | 113.4  | 101.9  | 144    | 0.702275454 | 93.4     | 102.5    | 9.1    | 0.911219512 | 0.8565   | -1.049 |
| 162277_r_at | 20.6   | 19     | 20.9   | 14.8   | 3.2    | 11.3   | 6      | 5.1    | 0.001637618 | 18.825   | 6.4      | 12.425 | 2.94140625  | 0.005088 | -3.239 |
| 162278_r_at | 44.3   | 37.4   | 55.6   | 56.7   | 77.6   | 71.6   | 76.1   | 54.5   | 0.023222651 | 48.5     | 69.95    | 21.45  | 0.693352395 | 0.02767  | 1.45   |
| 162279_f_at | 1334   | 971.9  | 1056.7 | 1075.2 | 1162.1 | 1033   | 1150.7 | 1273.8 | 0.643272949 | 1109.45  | 1154.9   | 45.45  | 0.960645943 | 0.5987   | -1.045 |



|             |       |        |        |       |        |       |       |        |             |         |          |         |             |          |        |
|-------------|-------|--------|--------|-------|--------|-------|-------|--------|-------------|---------|----------|---------|-------------|----------|--------|
| 162280_f_at | 7.8   | 6.4    | 6.8    | 31    | 3.9    | 15.4  | 8.4   | 6.3    | 0.526780851 | 13      | 8.5      | 4.5     | 1.529411765 | 0.5495   | -1.35  |
| 162281_at   | 19.3  | 53.8   | 46     | 71.8  | 30.8   | 15.1  | 21.6  | 87.2   | 0.665648556 | 47.725  | 38.675   | 9.05    | 1.234001293 | 0.4966   | -1.408 |
| 162282_f_at | 94.3  | 178.1  | 104.5  | 112.8 | 211.4  | 80.7  | 95.1  | 126.7  | 0.86884046  | 122.425 | 128.475  | 6.05    | 0.952909126 | 0.972    | -1.009 |
| 162283_r_at | 17.2  | 4.2    | 17.9   | 17.6  | 23.8   | 12.5  | 3     | 9.1    | 0.713471995 | 14.225  | 12.1     | 2.125   | 1.175619835 | 0.6616   | -1.294 |
| 162284_r_at | 673.3 | 644.4  | 671.6  | 783.2 | 1015.8 | 600   | 912.9 | 927.9  | 0.155634544 | 693.125 | 864.15   | 171.025 | 0.802088758 | 0.1539   | 1.226  |
| 162285_r_at | 1.8   | 3.3    | 2.9    | 3.4   | 6.4    | 2.5   | 18.8  | 4.5    | 0.25175981  | 2.85    | 8.05     | 5.2     | 0.354037267 | 0.1288   | 2.193  |
| 162286_r_at | 62.7  | 103.1  | 16.2   | 41.8  | 194.7  | 73.1  | 102.3 | 39.4   | 0.280737121 | 55.95   | 102.375  | 46.425  | 0.546520147 | 0.2582   | 1.901  |
| 162287_r_at | 55.8  | 71.3   | 87.1   | 70.4  | 117.6  | 100   | 99.4  | 100.6  | 0.00681292  | 71.15   | 104.4    | 33.25   | 0.68151341  | 0.007587 | 1.482  |
| 162288_f_at | 97.3  | 65.9   | 79.3   | 111.8 | 163    | 126.6 | 105   | 102.9  | 0.087165226 | 88.575  | 124.375  | 35.8    | 0.712160804 | 0.07354  | 1.407  |
| 162289_at   | 4.5   | 2      | 5.8    | 2.6   | 23.4   | 15.1  | 3.1   | 7.6    | 0.148505162 | 3.725   | 12.3     | 8.575   | 0.302845528 | 0.0873   | 2.799  |
| 162290_f_at | 115.4 | 82.5   | 153.9  | 114.5 | 89.3   | 110.2 | 179.2 | 160.5  | 0.506441041 | 116.575 | 134.8    | 18.225  | 0.864799703 | 0.5498   | 1.14   |
| 162291_r_at | 11    | 0.9    | 12     | 1.2   | 1      | 2.2   | 13    | 9.8    | 0.959013042 | 6.275   | 6.5      | 0.225   | 0.965384615 | 0.8466   | 1.205  |
| 162292_r_at | 783.6 | 792.9  | 882.6  | 955.2 | 923    | 672.5 | 805.9 | 781    | 0.411783453 | 853.575 | 795.6    | 57.975  | 1.072869532 | 0.3954   | -1.076 |
| 162293_r_at | 22.6  | 30.6   | 55.7   | 74.3  | 111.8  | 41.9  | 25.6  | 26.2   | 0.823455528 | 45.8    | 51.375   | 5.575   | 0.891484185 | 0.9583   | -1.024 |
| 162294_f_at | 9.8   | 1.4    | 1.5    | 12.3  | 8.7    | 2     | 2.4   | 4.1    | 0.57195189  | 6.25    | 4.3      | 1.95    | 1.453488372 | 0.8863   | -1.106 |
| 162295_at   | 2.4   | 4      | 3.7    | 3.4   | 8.4    | 10.3  | 1.8   | 3.3    | 0.2942657   | 3.375   | 5.95     | 2.575   | 0.567226891 | 0.426    | 1.434  |
| 162296_at   | 88.9  | 80.1   | 25.6   | 104.5 | 72.3   | 56.1  | 112.1 | 83.9   | 0.772792712 | 74.775  | 81.1     | 6.325   | 0.922009864 | 0.6393   | 1.19   |
| 162297_s_at | 62.3  | 46     | 63     | 45    | 69.6   | 41.8  | 59.8  | 68.8   | 0.496022916 | 54.075  | 60       | 5.925   | 0.90125     | 0.5446   | -1.102 |
| 162298_r_at | 3.6   | 0.4    | 0.5    | 4     | 16.9   | 13.2  | 0.5   | 2.9    | 0.213016969 | 2.125   | 8.375    | 6.25    | 0.253731343 | 0.3145   | 3.091  |
| 162299_f_at | 1241  | 1075.3 | 1115.3 | 1157  | 1383.1 | 899.4 | 1218  | 1164.2 | 0.867430559 | 1147.15 | 1166.175 | 19.025  | 0.983685982 | 0.9517   | -1.006 |
| 162300_at   | 4.4   | 1.4    | 9.7    | 3.2   | 6.2    | 4.6   | 1.8   | 4.9    | 0.887839047 | 4.675   | 4.375    | 0.3     | 1.068571429 | 0.8965   | -1.069 |
| 162301_f_at | 196.2 | 150.7  | 141.7  | 154   | 165    | 118.8 | 165.7 | 191.1  | 0.980249197 | 160.65  | 160.15   | 0.5     | 1.003122073 | 0.9395   | -1.01  |
| 162302_f_at | 256.5 | 255.6  | 296.6  | 278.9 | 249.5  | 194.4 | 232.7 | 272.9  | 0.133940923 | 271.9   | 237.375  | 34.525  | 1.145444971 | 0.1285   | -1.152 |
| 162303_f_at | 15    | 17.2   | 23.4   | 17.3  | 40.3   | 32.3  | 25.1  | 3.9    | 0.43086466  | 18.225  | 25.4     | 7.175   | 0.717519685 | 0.934    | -1.048 |
| 162304_r_at | 19.5  | 33.1   | 17.5   | 16.9  | 44.2   | 7     | 12    | 12.5   | 0.776702754 | 21.75   | 18.925   | 2.825   | 1.149273448 | 0.4317   | -1.424 |
| 162305_f_at | 3.9   | 5.8    | 6.1    | 7.4   | 12.4   | 9.5   | 5.8   | 6.2    | 0.188483119 | 5.8     | 8.475    | 2.675   | 0.684365782 | 0.1634   | 1.426  |
| 162306_at   | 4     | 1.4    | 2.1    | 1.8   | 3.2    | 1.2   | 1.6   | 2.4    | 0.768170878 | 2.325   | 2.1      | 0.225   | 1.107142857 | 0.7787   | -1.096 |
| 162307_at   | 10.7  | 9.2    | 46.1   | 10.3  | 41.6   | 13.2  | 17.7  | 36     | 0.506547562 | 19.075  | 27.125   | 8.05    | 0.703225806 | 0.327    | 1.654  |
| 162308_f_at | 119.7 | 101.6  | 151.8  | 124.6 | 89.7   | 138.6 | 139.2 | 146.8  | 0.812528004 | 124.425 | 128.575  | 4.15    | 0.967723119 | 0.8664   | -1.025 |
| 162309_at   | 8.1   | 3.5    | 8.5    | 5.1   | 4.9    | 2.9   | 3.9   | 5.1    | 0.182325936 | 6.3     | 4.2      | 2.1     | 1.5         | 0.192    | -1.438 |
| 162310_r_at | 146.5 | 127.4  | 99.5   | 52.9  | 130.8  | 69.5  | 140.1 | 168.5  | 0.504813227 | 106.575 | 127.225  | 20.65   | 0.837689133 | 0.535    | 1.215  |
| 162311_f_at | 437   | 470.8  | 525.5  | 463.6 | 507.2  | 527.7 | 578.7 | 545.6  | 0.035331128 | 474.225 | 539.8    | 65.575  | 0.878519822 | 0.03344  | 1.139  |
| 162312_f_at | 10.2  | 12.2   | 9.5    | 2.9   | 4      | 11.1  | 5.3   | 20.4   | 0.739299662 | 8.7     | 10.2     | 1.5     | 0.852941176 | 0.8637   | -1.093 |
| 162313_f_at | 80.8  | 100.3  | 92.5   | 105.2 | 73.1   | 106.3 | 123.6 | 135.6  | 0.364862077 | 94.7    | 109.65   | 14.95   | 0.863657091 | 0.4298   | 1.133  |
| 162314_at   | 127   | 98.9   | 88.2   | 131.2 | 77.1   | 81.1  | 111.4 | 157.6  | 0.841013153 | 111.325 | 106.8    | 4.525   | 1.042368914 | 0.7271   | -1.072 |
| 162315_f_at | 7.2   | 11.2   | 8.6    | 6.2   | 31.5   | 19.9  | 24.4  | 8.5    | 0.073969673 | 8.3     | 21.075   | 12.775  | 0.393831554 | 0.03345  | 2.343  |
| 162316_f_at | 27.7  | 74.4   | 37     | 36.2  | 85.3   | 33.1  | 83.6  | 28.3   | 0.49400847  | 43.825  | 57.575   | 13.75   | 0.761181068 | 0.5644   | 1.247  |
| 162317_r_at | 51.3  | 60.7   | 69.6   | 28.3  | 96.6   | 41.8  | 67.3  | 80     | 0.244204797 | 52.475  | 71.425   | 18.95   | 0.734686734 | 0.2816   | 1.372  |
| 162318_r_at | 5.1   | 20     | 7.3    | 17    | 25.8   | 2.4   | 6.8   | 43.5   | 0.51300841  | 12.35   | 19.625   | 7.275   | 0.629299363 | 0.9115   | -1.089 |
| 162319_i_at | 54.9  | 53     | 50     | 62.1  | 84.8   | 46.1  | 52.7  | 38.5   | 0.962933731 | 55      | 55.525   | 0.525   | 0.9905448   | 0.8595   | -1.033 |
| 162320_at   | 25.6  | 25.3   | 32.9   | 21.2  | 18.5   | 13.2  | 25.2  | 48.6   | 0.988614406 | 26.25   | 26.375   | 0.125   | 0.995260664 | 0.7318   | -1.111 |
| 162321_f_at | 74.9  | 52.5   | 14.7   | 55    | 72.6   | 26.2  | 110.1 | 37.7   | 0.608410404 | 49.275  | 61.65    | 12.375  | 0.799270073 | 0.6537   | 1.256  |
| 162322_r_at | 39.1  | 28.2   | 50.7   | 46.1  | 63.1   | 41.6  | 38.7  | 57.2   | 0.281610735 | 41.025  | 50.15    | 9.125   | 0.818045862 | 0.2896   | 1.226  |
| 162323_at   | 1.8   | 3.5    | 25.2   | 3.2   | 10     | 4.5   | 5.3   | 3.3    | 0.674939914 | 8.425   | 5.775    | 2.65    | 1.458874459 | 0.8659   | 1.116  |
| 162324_at   | 30.6  | 22.8   | 45.5   | 26.8  | 17.3   | 11.2  | 31.1  | 17.1   | 0.110029687 | 31.425  | 19.175   | 12.25   | 1.638852673 | 0.08603  | -1.695 |
| 162325_f_at | 106.4 | 111.4  | 119.8  | 80.6  | 20.7   | 124.1 | 113.6 | 107.7  | 0.635624029 | 104.55  | 91.525   | 13.025  | 1.142310844 | 0.4894   | -1.38  |
| 162326_at   | 252.4 | 244.7  | 259.2  | 236.5 | 190.8  | 220.2 | 300.4 | 314.5  | 0.803355802 | 248.2   | 256.475  | 8.275   | 0.967735647 | 0.9263   | -1.012 |
| 162327_f_at | 366.1 | 289    | 371.3  | 315.8 | 391.2  | 326.9 | 304.2 | 327.8  | 0.944761941 | 335.55  | 337.525  | 1.975   | 0.994148582 | 0.9346   | -1.007 |
| 162328_f_at | 109.3 | 60.9   | 92.1   | 112.1 | 98.4   | 93.3  | 131   | 127.4  | 0.2626019   | 93.6    | 112.525  | 18.925  | 0.831815152 | 0.272    | 1.222  |
| 162329_r_at | 12.1  | 9.9    | 9.4    | 36.4  | 14     | 37    | 19.2  | 7.9    | 0.785248407 | 16.95   | 19.525   | 2.575   | 0.868117798 | 0.7289   | 1.178  |
| 162330_f_at | 158.6 | 100.9  | 150.2  | 138.9 | 121.3  | 115   | 91.8  | 133.9  | 0.217674718 | 137.15  | 115.5    | 21.65   | 1.187445887 | 0.243    | -1.182 |
| 162331_f_at | 71.3  | 25.6   | 25.2   | 31.6  | 30.7   | 33.2  | 31.7  | 27.6   | 0.541083793 | 38.425  | 30.8     | 7.625   | 1.247564935 | 0.6401   | -1.13  |
| 162332_f_at | 10.6  | 27.7   | 10.5   | 13.2  | 18.5   | 35.2  | 20.4  | 45.7   | 0.11616253  | 15.5    | 29.95    | 14.45   | 0.517529215 | 0.07557  | 1.969  |
| 162333_r_at | 139.3 | 119    | 167    | 152.4 | 131.9  | 135.1 | 72.3  | 212.9  | 0.845698993 | 144.425 | 138.05   | 6.375   | 1.046178921 | 0.6606   | -1.114 |
| 162334_r_at | 39    | 23.9   | 11.6   | 8.9   | 57.5   | 6.3   | 50.1  | 20     | 0.409605165 | 20.85   | 33.475   | 12.625  | 0.622852875 | 0.6058   | 1.394  |
| 162335_at   | 61.1  | 22.2   | 68.6   | 24.9  | 50.6   | 13.8  | 12.2  | 26.3   | 0.266526402 | 44.2    | 25.725   | 18.475  | 1.718172983 | 0.234    | -1.791 |



|             |       |       |       |        |        |       |        |        |             |         |         |         |             |         |        |
|-------------|-------|-------|-------|--------|--------|-------|--------|--------|-------------|---------|---------|---------|-------------|---------|--------|
| 162336_r_at | 21.5  | 27.4  | 10.9  | 24.8   | 41.4   | 23.1  | 18     | 21.3   | 0.484075847 | 21.15   | 25.95   | 4.8     | 0.815028902 | 0.4781  | 1.232  |
| 162337_f_at | 255   | 179.9 | 206   | 237.6  | 205.4  | 192.7 | 200.8  | 170.3  | 0.207792396 | 219.625 | 192.3   | 27.325  | 1.142095684 | 0.2006  | -1.135 |
| 162338_r_at | 750.5 | 579   | 817.9 | 807.6  | 1007.4 | 673.7 | 726.4  | 747.3  | 0.611296004 | 738.75  | 788.7   | 49.95   | 0.936667935 | 0.6204  | -1.064 |
| 162339_r_at | 11.5  | 12.1  | 11.6  | 14.4   | 68.2   | 7.8   | 49.1   | 49.9   | 0.091065177 | 12.4    | 43.75   | 31.35   | 0.283428571 | 0.09055 | 2.728  |
| 162340_r_at | 120   | 141.1 | 116.7 | 129.7  | 110.5  | 129.2 | 142.2  | 151.7  | 0.560550586 | 126.875 | 133.4   | 6.525   | 0.951086957 | 0.592   | -1.047 |
| 162341_r_at | 377.2 | 392.6 | 729.6 | 610.9  | 456.9  | 623.9 | 531    | 700.1  | 0.639026681 | 527.575 | 577.975 | 50.4    | 0.912798996 | 0.5522  | 1.126  |
| 162342_at   | 9.2   | 35.1  | 28.1  | 10.2   | 15.9   | 38.3  | 49.9   | 11.8   | 0.486841001 | 20.65   | 28.975  | 8.325   | 0.712683348 | 0.5141  | 1.401  |
| 162343_f_at | 282.7 | 600   | 464.8 | 410.6  | 1071.6 | 416.1 | 642    | 422.2  | 0.300152904 | 439.525 | 637.975 | 198.45  | 0.688937654 | 0.2724  | 1.39   |
| 162344_at   | 5.4   | 20    | 6.4   | 2.8    | 2.2    | 3.8   | 3.7    | 20.8   | 0.866940189 | 8.65    | 7.625   | 1.025   | 1.13442623  | 0.6817  | -1.315 |
| 162345_at   | 5     | 11.2  | 23.6  | 5.5    | 4.3    | 9     | 3.5    | 5.2    | 0.274398586 | 11.325  | 5.5     | 5.825   | 2.059090909 | 0.2102  | -1.792 |
| 162346_f_at | 28.2  | 38.2  | 38.5  | 41.2   | 46.4   | 48.6  | 41.8   | 40.1   | 0.073963187 | 36.525  | 44.225  | 7.7     | 0.825890334 | 0.08379 | 1.219  |
| 162347_f_at | 821.2 | 818.2 | 891.1 | 1116.3 | 1122.5 | 859.3 | 1038.4 | 1276.2 | 0.198430037 | 911.7   | 1074.1  | 162.4   | 0.84880365  | 0.1923  | 1.176  |
| 162348_r_at | 39.4  | 50    | 93.1  | 16.8   | 43.4   | 29.5  | 17.8   | 70.1   | 0.642124211 | 49.825  | 40.2    | 9.625   | 1.239427861 | 0.7347  | -1.177 |
| 162349_i_at | 29.1  | 45.1  | 27.9  | 35.6   | 33.4   | 28.4  | 22.4   | 45.7   | 0.768799312 | 34.425  | 32.475  | 1.95    | 1.060046189 | 0.7067  | -1.076 |
| 162350_at   | 91.4  | 198   | 132.3 | 163.9  | 166.6  | 160.6 | 188.1  | 187.4  | 0.29328861  | 146.4   | 175.675 | 29.275  | 0.833357051 | 0.2465  | 1.245  |
| 162351_f_at | 32.4  | 49.5  | 56.3  | 62.2   | 79.2   | 63.6  | 43.5   | 61.3   | 0.272151281 | 50.1    | 61.9    | 11.8    | 0.809369952 | 0.2938  | 1.243  |
| 162352_r_at | 1.5   | 1.9   | 2.3   | 1.2    | 1.3    | 2.6   | 2      | 2.1    | 0.473189113 | 1.725   | 2       | 0.275   | 0.8625      | 0.589   | 1.127  |
| 162353_at   | 103.2 | 109.2 | 107.9 | 112.2  | 122.2  | 106.5 | 132.3  | 158.9  | 0.140218625 | 108.125 | 129.975 | 21.85   | 0.831890748 | 0.0879  | 1.19   |
| 162354_f_at | 7.7   | 9.9   | 48.4  | 12     | 11     | 24.9  | 10.8   | 13.6   | 0.689393401 | 19.5    | 15.075  | 4.425   | 1.293532338 | 0.963   | -1.022 |
| 162355_at   | 22    | 2.5   | 21    | 9.2    | 25.3   | 8.1   | 2.9    | 12.9   | 0.844826883 | 13.675  | 12.3    | 1.375   | 1.111788618 | 0.9049  | -1.089 |
| 162356_r_at | 504.1 | 450.7 | 517.1 | 508.5  | 630.1  | 365.6 | 566.4  | 551    | 0.607665905 | 495.1   | 528.275 | 33.175  | 0.937201268 | 0.721   | -1.047 |
| 162357_at   | 4.7   | 5.1   | 18.2  | 6.3    | 8.7    | 19.9  | 12.8   | 19.3   | 0.168834976 | 8.575   | 15.175  | 6.6     | 0.565074135 | 0.1125  | 1.986  |
| 162358_i_at | 201.7 | 323.2 | 251.6 | 319    | 204.8  | 208.7 | 286.1  | 326.8  | 0.69366716  | 273.875 | 256.6   | 17.275  | 1.067322681 | 0.6904  | -1.07  |
| 162359_r_at | 123.6 | 113.8 | 119.1 | 108.9  | 121.3  | 101.5 | 152.8  | 92.3   | 0.966357474 | 116.35  | 116.975 | 0.625   | 0.994656978 | 0.9155  | -1.013 |
| 162360_f_at | 162.5 | 235.9 | 183.2 | 198.4  | 238.6  | 174   | 178.1  | 264.4  | 0.519728439 | 195     | 213.775 | 18.775  | 0.912174015 | 0.5415  | -1.088 |
| 162361_at   | 9.3   | 6     | 33.5  | 27.5   | 36     | 9     | 6.4    | 10.5   | 0.721748366 | 19.075  | 15.475  | 3.6     | 1.232633279 | 0.7201  | -1.235 |
| 162362_f_at | 3.9   | 23.1  | 30.4  | 35.7   | 47.5   | 16.5  | 4.5    | 37.1   | 0.803572689 | 23.275  | 26.4    | 3.125   | 0.881628788 | 0.9201  | -1.08  |
| 162363_at   | 63.4  | 42.3  | 28.3  | 15.9   | 65.3   | 55.3  | 79.6   | 103.2  | 0.038694518 | 37.475  | 75.85   | 38.375  | 0.494067238 | 0.04831 | 2.226  |
| 162364_f_at | 25.8  | 26.6  | 55.1  | 33.8   | 34.3   | 30.8  | 10.5   | 40.1   | 0.520817295 | 35.325  | 28.925  | 6.4     | 1.221261884 | 0.4806  | -1.303 |
| 162365_i_at | 220.4 | 206.3 | 522.1 | 344.9  | 270.3  | 445.8 | 287.8  | 329.3  | 0.910468556 | 323.425 | 333.3   | 9.875   | 0.970372037 | 0.7441  | -1.087 |
| 162366_r_at | 19    | 10    | 18.4  | 21.7   | 25     | 22.8  | 37.4   | 29.6   | 0.033659808 | 17.275  | 28.7    | 11.425  | 0.601916376 | 0.04128 | 1.7    |
| 162367_f_at | 15.4  | 2.7   | 14.4  | 10.8   | 10.3   | 14.5  | 10.3   | 10.8   | 0.842686064 | 10.825  | 11.475  | 0.65    | 0.94335512  | 0.5929  | 1.263  |
| 162368_r_at | 4     | 1.9   | 4.8   | 4.3    | 1.9    | 2     | 1.8    | 4.1    | 0.17527883  | 3.75    | 2.45    | 1.3     | 1.530612245 | 0.1737  | -1.555 |
| 162369_f_at | 15.6  | 34.3  | 5.2   | 20.7   | 5.5    | 6.8   | 15.3   | 11.7   | 0.233613849 | 18.95   | 9.825   | 9.125   | 1.928753181 | 0.2856  | -1.72  |
| 162370_r_at | 70.7  | 117.7 | 88.3  | 244.6  | 111    | 51    | 133.5  | 238.8  | 0.955191392 | 130.325 | 133.575 | 3.25    | 0.9756691   | 0.9977  | -1.001 |
| 162371_r_at | 185.3 | 181.8 | 252.5 | 182.6  | 325.8  | 204.2 | 270.1  | 239.1  | 0.112097542 | 200.55  | 259.8   | 59.25   | 0.771939954 | 0.0922  | 1.29   |
| 162372_f_at | 10.7  | 13    | 18.1  | 18.1   | 20.6   | 15.4  | 13.8   | 55.7   | 0.334398193 | 14.975  | 26.375  | 11.4    | 0.567772512 | 0.2693  | 1.52   |
| 162373_r_at | 9.2   | 7.4   | 22.1  | 9.2    | 17.2   | 37.1  | 9.8    | 16     | 0.293543638 | 11.975  | 20.025  | 8.05    | 0.598002497 | 0.2251  | 1.64   |
| 162374_r_at | 2.3   | 1.4   | 2.9   | 12.7   | 2.1    | 10.2  | 2      | 5.4    | 0.976694249 | 4.825   | 4.925   | 0.1     | 0.979695431 | 0.7886  | 1.189  |
| 162375_i_at | 1.1   | 1.8   | 1.7   | 1.5    | 1.9    | 2.5   | 1.1    | 1.4    | 0.58860754  | 1.525   | 1.725   | 0.2     | 0.884057971 | 0.6237  | 1.108  |
| 162376_r_at | 17.2  | 10.7  | 16.4  | 11.5   | 2.6    | 11.6  | 12.2   | 6.9    | 0.094811768 | 13.95   | 8.325   | 5.625   | 1.675675676 | 0.1356  | -1.93  |
| 162377_f_at | 54.1  | 140.6 | 99    | 113    | 153.6  | 108.8 | 132.3  | 113.2  | 0.280018243 | 101.675 | 126.975 | 25.3    | 0.800748179 | 0.2648  | 1.31   |
| 162378_r_at | 12.2  | 6.6   | 2.1   | 6.5    | 4.1    | 1.1   | 4.7    | 2.7    | 0.172926234 | 6.85    | 3.15    | 3.7     | 2.174603175 | 0.1868  | -2.09  |
| 162379_r_at | 151.7 | 200.2 | 157   | 235.2  | 189    | 210.5 | 155.5  | 284.5  | 0.507838105 | 186.025 | 209.875 | 23.85   | 0.886360929 | 0.5164  | -1.119 |
| 162380_r_at | 91.1  | 99.7  | 113.9 | 111.5  | 156.3  | 130.9 | 57.3   | 139.3  | 0.501847763 | 104.05  | 120.95  | 16.9    | 0.86027284  | 0.7255  | -1.091 |
| 162381_f_at | 140.5 | 240.9 | 186.6 | 208.2  | 89.9   | 116.4 | 215.1  | 235.5  | 0.506782962 | 194.05  | 164.225 | 29.825  | 1.181610595 | 0.4167  | -1.255 |
| 162382_f_at | 61    | 64.9  | 79    | 22.3   | 101.2  | 75.5  | 58.3   | 86.8   | 0.173337994 | 56.8    | 80.45   | 23.65   | 0.706028589 | 0.2126  | 1.535  |
| 162383_r_at | 270.1 | 249.5 | 295   | 191.6  | 312.8  | 279.2 | 347.3  | 387.1  | 0.046318933 | 251.55  | 331.6   | 80.05   | 0.758594692 | 0.05223 | 1.325  |
| 162384_f_at | 1.3   | 17.9  | 8.1   | 15.1   | 12.8   | 15    | 1.2    | 37.4   | 0.512839286 | 10.6    | 16.6    | 6       | 0.638554217 | 0.7757  | 1.325  |
| 162385_i_at | 44.9  | 29.8  | 6.9   | 45.6   | 20.5   | 53.5  | 43.1   | 52     | 0.411233956 | 31.8    | 42.275  | 10.475  | 0.752217623 | 0.4116  | 1.552  |
| 162386_at   | 3.6   | 2     | 8.4   | 2.4    | 3.2    | 1.9   | 7.9    | 3.5    | 0.990283359 | 4.1     | 4.125   | 0.025   | 0.993939394 | 0.944   | -1.033 |
| 162387_f_at | 119.1 | 105   | 137.9 | 147.6  | 103.3  | 159.9 | 120.4  | 131.3  | 0.933629684 | 127.4   | 128.725 | 1.325   | 0.989706739 | 0.959   | -1.006 |
| 162388_r_at | 502.6 | 416.6 | 553   | 447.5  | 796    | 448.3 | 567.2  | 514.7  | 0.280553459 | 479.925 | 581.55  | 101.625 | 0.825251483 | 0.2508  | 1.191  |
| 162389_at   | 8     | 9.6   | 31.4  | 9.1    | 12.8   | 5.8   | 72.6   | 11.9   | 0.538888728 | 14.525  | 25.775  | 11.25   | 0.563530553 | 0.6807  | 1.31   |
| 162390_r_at | 0.6   | 1     | 0.4   | 0.7    | 0.8    | 1.4   | 4.2    | 1.1    | 0.223827521 | 0.675   | 1.875   | 1.2     | 0.36        | 0.07853 | 2.402  |
| 162391_r_at | 0.9   | 1.5   | 1.9   | 1.7    | 1.1    | 2.3   | 1.6    | 3.5    | 0.32933059  | 1.5     | 2.125   | 0.625   | 0.705882353 | 0.3798  | 1.333  |



|             |        |        |        |        |        |        |        |        |             |          |         |         |             |         |        |
|-------------|--------|--------|--------|--------|--------|--------|--------|--------|-------------|----------|---------|---------|-------------|---------|--------|
| 162392_r_at | 216.6  | 163.7  | 231.1  | 287    | 260.5  | 264.4  | 196.5  | 377.9  | 0.317125721 | 224.6    | 274.825 | 50.225  | 0.817247339 | 0.3146  | 1.214  |
| 162393_at   | 21.8   | 35.8   | 35.1   | 54.3   | 23.8   | 41.4   | 35.4   | 33.1   | 0.681800269 | 36.75    | 33.425  | 3.325   | 1.09947644  | 0.7849  | -1.065 |
| 162394_r_at | 90.4   | 48.8   | 83.8   | 81.8   | 84.9   | 41.1   | 113.9  | 117    | 0.544516659 | 76.2     | 89.225  | 13.025  | 0.854020734 | 0.7159  | 1.113  |
| 162395_r_at | 7.5    | 0.9    | 1.9    | 1.9    | 27.2   | 2      | 2.1    | 21.7   | 0.218576597 | 3.05     | 13.25   | 10.2    | 0.230188679 | 0.2241  | 3.122  |
| 162396_at   | 3.7    | 9.7    | 14.3   | 9.1    | 10.5   | 25.5   | 9      | 25.7   | 0.165471793 | 9.2      | 17.675  | 8.475   | 0.520509194 | 0.1592  | 1.909  |
| 162397_r_at | 137.6  | 137.1  | 114.5  | 150.4  | 178.7  | 115.9  | 195.2  | 183.5  | 0.158208786 | 134.9    | 168.325 | 33.425  | 0.801425813 | 0.1701  | 1.229  |
| 162398_at   | 35.8   | 104.4  | 33.4   | 71.7   | 87     | 43     | 101.6  | 22.2   | 0.935156632 | 61.325   | 63.45   | 2.125   | 0.966509062 | 0.9742  | -1.015 |
| 162399_f_at | 583.3  | 1042.3 | 698.6  | 783.7  | 1050.1 | 736.6  | 762.2  | 748.4  | 0.714976048 | 776.975  | 824.325 | 47.35   | 0.942559063 | 0.6519  | -1.073 |
| 162400_f_at | 69.2   | 74.8   | 73.6   | 113.6  | 96     | 99.6   | 119.6  | 91.6   | 0.178594833 | 82.8     | 101.7   | 18.9    | 0.814159292 | 0.1347  | 1.247  |
| 162401_f_at | 176.8  | 214.9  | 171    | 128.4  | 191    | 194    | 186.9  | 172.1  | 0.517145212 | 172.775  | 186     | 13.225  | 0.928897849 | 0.4462  | -1.093 |
| 162402_r_at | 33.4   | 32     | 7.3    | 37.5   | 46.5   | 9.5    | 40     | 42.8   | 0.537973874 | 27.55    | 34.7    | 7.15    | 0.793948127 | 0.678   | 1.267  |
| 162403_at   | 57.8   | 83.6   | 61.2   | 89.9   | 56     | 60.7   | 70.2   | 116    | 0.876775062 | 73.125   | 75.725  | 2.6     | 0.965665236 | 0.9615  | -1.01  |
| 162404_i_at | 58.7   | 13.5   | 43.8   | 11.9   | 50.4   | 37     | 53.6   | 11     | 0.7035605   | 31.975   | 38      | 6.025   | 0.841447368 | 0.6723  | 1.276  |
| 162405_at   | 48     | 30.3   | 41     | 28.8   | 15.9   | 26.1   | 31.5   | 41.1   | 0.27506465  | 37.025   | 28.65   | 8.375   | 1.292321117 | 0.261   | -1.337 |
| 162406_f_at | 14.6   | 2.9    | 9.6    | 3.7    | 5      | 7.1    | 4.3    | 6.6    | 0.534295817 | 7.7      | 5.75    | 1.95    | 1.339130435 | 0.8037  | -1.109 |
| 162407_at   | 163.2  | 118.6  | 137.3  | 186.7  | 165    | 138.4  | 191.2  | 203.6  | 0.308758634 | 151.45   | 174.55  | 23.1    | 0.867659696 | 0.3089  | 1.157  |
| 162408_f_at | 3.2    | 5.1    | 5      | 5.6    | 12.8   | 5      | 2.4    | 6.6    | 0.442590268 | 4.725    | 6.7     | 1.975   | 0.705223881 | 0.6009  | 1.226  |
| 162409_r_at | 14.4   | 19.4   | 25.3   | 23.2   | 10.9   | 36.8   | 9.5    | 40.7   | 0.677701781 | 20.575   | 24.475  | 3.9     | 0.840653728 | 0.9739  | -1.014 |
| 162410_s_at | 17.6   | 4.1    | 7.8    | 5.1    | 6.9    | 6      | 11.4   | 6.3    | 0.779165649 | 8.65     | 7.65    | 1       | 1.130718954 | 0.9772  | -1.011 |
| 162411_f_at | 1.3    | 1.7    | 5.2    | 3.1    | 1.9    | 2.4    | 1.9    | 6.5    | 0.81402144  | 2.825    | 3.175   | 0.35    | 0.88976378  | 0.8014  | -1.118 |
| 162412_r_at | 5.1    | 1.3    | 8.4    | 1.6    | 5.7    | 1.4    | 1.9    | 7      | 0.964831069 | 4.1      | 4       | 0.1     | 1.025       | 0.9332  | -1.055 |
| 162413_r_at | 23.9   | 3.3    | 9.5    | 4.4    | 39.4   | 17.2   | 18.5   | 30     | 0.06446398  | 10.275   | 26.275  | 16      | 0.391056137 | 0.0503  | 3.282  |
| 162414_f_at | 122.1  | 247.7  | 118.6  | 187.9  | 250.1  | 222.5  | 205.8  | 274.4  | 0.107279415 | 169.075  | 238.2   | 69.125  | 0.709802687 | 0.08759 | 1.47   |
| 162415_f_at | 361.6  | 439.1  | 357.5  | 400    | 411.3  | 331.5  | 418.1  | 458.6  | 0.657831634 | 389.55   | 404.875 | 15.325  | 0.962148811 | 0.689   | -1.036 |
| 162416_at   | 1.9    | 15     | 6.5    | 6.6    | 18.9   | 1.6    | 5.5    | 10.6   | 0.734683896 | 7.5      | 9.15    | 1.65    | 0.819672131 | 0.9027  | -1.091 |
| 162417_at   | 120.4  | 86.7   | 111.6  | 111    | 95.7   | 89.4   | 109.8  | 92.4   | 0.268632964 | 107.425  | 96.825  | 10.6    | 1.109475859 | 0.2828  | -1.105 |
| 162418_r_at | 100.9  | 39.7   | 88.9   | 96.7   | 109.5  | 76.9   | 125.9  | 185.6  | 0.170235251 | 81.55    | 124.475 | 42.925  | 0.655151637 | 0.1786  | 1.547  |
| 162419_r_at | 17.7   | 2.9    | 17.7   | 3.4    | 25.9   | 19.1   | 16.7   | 19.7   | 0.095004954 | 10.425   | 20.35   | 9.925   | 0.512285012 | 0.09887 | 2.684  |
| 162420_r_at | 240.7  | 201.9  | 263.9  | 207.3  | 335.6  | 195    | 388.9  | 326.7  | 0.135010987 | 228.45   | 311.55  | 83.1    | 0.733269138 | 0.1318  | 1.33   |
| 162421_r_at | 4.2    | 2.6    | 12.4   | 0.7    | 2.6    | 4.3    | 1      | 10     | 0.882682866 | 4.975    | 4.475   | 0.5     | 1.111731844 | 0.9713  | -1.029 |
| 162422_r_at | 560.4  | 556.2  | 694.7  | 750.2  | 356.3  | 260.1  | 713.6  | 562.6  | 0.208295609 | 640.375  | 473.15  | 167.225 | 1.353429145 | 0.1737  | -1.445 |
| 162423_f_at | 40.3   | 9.9    | 43.8   | 23.5   | 41.5   | 16.3   | 8.5    | 9.1    | 0.377284596 | 29.375   | 18.85   | 10.525  | 1.558355438 | 0.3441  | -1.672 |
| 162424_f_at | 889.1  | 1289.8 | 1016.4 | 1135.8 | 1387.7 | 1242.9 | 1295.7 | 1122.7 | 0.13651662  | 1082.775 | 1262.25 | 179.475 | 0.857813428 | 0.1289  | 1.173  |
| 162425_f_at | 21.2   | 40.7   | 36.1   | 59     | 47.9   | 44.5   | 35.7   | 51.8   | 0.536993133 | 39.25    | 44.975  | 5.725   | 0.872707059 | 0.4326  | 1.21   |
| 162426_f_at | 1401.5 | 1117.8 | 1321.2 | 1338.5 | 752.3  | 917    | 1111.1 | 1151.8 | 0.035863767 | 1294.75  | 983.05  | 311.7   | 1.317074411 | 0.04065 | -1.331 |
| 162427_r_at | 11.2   | 11.6   | 7      | 9.8    | 7.7    | 12.5   | 14.3   | 15.6   | 0.250985364 | 9.9      | 12.525  | 2.625   | 0.790419162 | 0.3029  | 1.247  |
| 162428_i_at | 647.8  | 506.1  | 458.6  | 649    | 564.2  | 498    | 408.7  | 903    | 0.823782668 | 565.375  | 593.475 | 28.1    | 0.952651754 | 0.9392  | -1.015 |
| 162429_r_at | 33     | 111.5  | 97.3   | 66.4   | 90.5   | 90.8   | 130.8  | 132.4  | 0.16373593  | 77.05    | 111.125 | 34.075  | 0.69336333  | 0.1777  | 1.565  |
| 162430_at   | 55.3   | 67.3   | 59.4   | 46.8   | 99.5   | 56.2   | 109.4  | 24     | 0.506639702 | 57.2     | 72.275  | 15.075  | 0.791421653 | 0.8149  | -1.091 |
| 162431_at   | 72.2   | 36.7   | 72.8   | 68.4   | 72.5   | 43.1   | 43     | 69.7   | 0.662417454 | 62.525   | 57.075  | 5.45    | 1.095488392 | 0.7102  | -1.09  |
| 162432_f_at | 74.1   | 46.9   | 64.1   | 35.6   | 44.8   | 67.1   | 53.5   | 68.6   | 0.759866513 | 55.175   | 58.5    | 3.325   | 0.943162393 | 0.6821  | -1.086 |
| 162433_f_at | 42     | 25.4   | 44.3   | 79.1   | 28.7   | 18.2   | 34.8   | 53.8   | 0.352061612 | 47.7     | 33.875  | 13.825  | 1.408118081 | 0.3405  | -1.398 |
| 162434_i_at | 15.7   | 2.8    | 6.3    | 15.8   | 2.1    | 4.6    | 11.1   | 6.5    | 0.336755771 | 10.15    | 6.075   | 4.075   | 1.670781893 | 0.4316  | -1.582 |
| 162435_f_at | 183.3  | 142.3  | 219.6  | 200.1  | 182.6  | 157.7  | 198.1  | 249.9  | 0.688290517 | 186.325  | 197.075 | 10.75   | 0.945452239 | 0.6984  | -1.056 |
| 162436_at   | 13.4   | 9.3    | 14     | 13.3   | 18.5   | 30.1   | 18.1   | 12     | 0.152483594 | 12.5     | 19.675  | 7.175   | 0.635324015 | 0.09802 | 1.51   |
| 162437_at   | 1.4    | 6.9    | 2      | 8.2    | 40.4   | 5.7    | 3.7    | 5.6    | 0.377232427 | 4.625    | 13.85   | 9.225   | 0.333935018 | 0.2683  | 2.34   |
| 162438_f_at | 85.5   | 102.9  | 110.9  | 108.7  | 123.5  | 104.6  | 91.5   | 119    | 0.442426428 | 102      | 109.65  | 7.65    | 0.930232558 | 0.4662  | -1.073 |
| 162439_at   | 15.8   | 1.3    | 1.7    | 17.2   | 1.1    | 3.8    | 5.2    | 17.2   | 0.71232829  | 9        | 6.825   | 2.175   | 1.318681319 | 0.912   | -1.109 |
| 162440_r_at | 1303.7 | 1386.1 | 1828.7 | 1514.9 | 1756.7 | 1556.4 | 1818.5 | 1504.2 | 0.323553913 | 1508.35  | 1658.95 | 150.6   | 0.909219687 | 0.292   | -1.106 |
| 162441_i_at | 15.4   | 16.1   | 16.5   | 11.8   | 20.4   | 15.8   | 16.3   | 19.5   | 0.10031795  | 14.95    | 18      | 3.05    | 0.830555556 | 0.1084  | 1.207  |
| 162442_r_at | 156.9  | 159    | 155.7  | 135.7  | 160.5  | 121.1  | 130.1  | 195    | 0.993639986 | 151.825  | 151.675 | 0.15    | 1.000988957 | 0.8878  | -1.017 |
| 162443_at   | 8.9    | 4.1    | 10.4   | 10.8   | 14.1   | 9.1    | 11.8   | 4.4    | 0.63518314  | 8.55     | 9.85    | 1.3     | 0.868020305 | 0.7377  | 1.126  |
| 162444_r_at | 47.6   | 43.4   | 52.1   | 44.2   | 50.5   | 55.4   | 41.2   | 46.2   | 0.695120463 | 46.825   | 48.325  | 1.5     | 0.968960166 | 0.722   | -1.028 |
| 162445_at   | 17.1   | 5.4    | 14.9   | 23.7   | 42.7   | 26.5   | 17.7   | 22.6   | 0.122595229 | 15.275   | 27.375  | 12.1    | 0.557990868 | 0.1239  | 1.93   |
| 162446_at   | 40.6   | 35.2   | 24.5   | 34.3   | 50.9   | 25.5   | 33     | 18.3   | 0.834274131 | 33.65    | 31.925  | 1.725   | 1.05403289  | 0.674   | -1.112 |
| 162447_f_at | 246.5  | 193.3  | 197.4  | 270.5  | 277.9  | 226.8  | 230.8  | 281.8  | 0.299304784 | 226.925  | 254.325 | 27.4    | 0.892263836 | 0.2841  | -1.127 |



|             |        |        |        |        |        |        |        |        |             |          |          |         |             |          |        |
|-------------|--------|--------|--------|--------|--------|--------|--------|--------|-------------|----------|----------|---------|-------------|----------|--------|
| 162448_f_at | 41.5   | 31.5   | 11.7   | 14.9   | 62.7   | 81     | 68.4   | 13.6   | 0.121498938 | 24.9     | 56.425   | 31.525  | 0.441293753 | 0.1894   | 2.133  |
| 162449_f_at | 30.3   | 12.6   | 18.9   | 3.5    | 4.2    | 32.1   | 33.8   | 29.7   | 0.374360541 | 16.325   | 24.95    | 8.625   | 0.654308617 | 0.564    | 1.519  |
| 162450_f_at | 3.3    | 2.2    | 23.1   | 4.1    | 5.1    | 4.1    | 7.5    | 18.9   | 0.90892669  | 8.175    | 8.9      | 0.725   | 0.918539326 | 0.5835   | 1.43   |
| 162451_r_at | 0.4    | 7.6    | 0.9    | 0.6    | 9.8    | 0.5    | 0.5    | 2.9    | 0.721867618 | 2.375    | 3.425    | 1.05    | 0.693430657 | 0.7197   | 1.453  |
| 162452_at   | 71.1   | 87.3   | 101.2  | 97.6   | 89.9   | 91.7   | 118.8  | 106.5  | 0.242113271 | 89.3     | 101.725  | 12.425  | 0.877856967 | 0.2453   | 1.142  |
| 162453_at   | 13.5   | 15.1   | 10.7   | 15.2   | 7.6    | 10.4   | 15     | 14.8   | 0.458658597 | 13.625   | 11.95    | 1.675   | 1.140167364 | 0.4259   | -1.168 |
| 162454_f_at | 11.3   | 5.3    | 18.6   | 5.4    | 24.5   | 20.9   | 28     | 13     | 0.043719442 | 10.15    | 21.6     | 11.45   | 0.469907407 | 0.04885  | 2.357  |
| 162455_f_at | 197.7  | 152.9  | 204.7  | 255.4  | 288.8  | 171.6  | 192.7  | 199.4  | 0.765037477 | 202.675  | 213.125  | 10.45   | 0.950967742 | 0.7717   | -1.048 |
| 162456_f_at | 16.2   | 15.7   | 20     | 13.4   | 23     | 17.6   | 18.9   | 20     | 0.095743864 | 16.325   | 19.875   | 3.55    | 0.821383648 | 0.09022  | 1.221  |
| 162457_f_at | 2433.1 | 1766.9 | 1831.7 | 1861.1 | 2637.1 | 1706.7 | 2314.8 | 3206   | 0.224932441 | 1973.2   | 2466.15  | 492.95  | 0.800113537 | 0.2226   | 1.229  |
| 162458_i_at | 302.9  | 266.7  | 313.2  | 398.9  | 348.9  | 352.7  | 321.6  | 387.5  | 0.354001409 | 320.425  | 352.675  | 32.25   | 0.908556036 | 0.3004   | -1.11  |
| 162459_f_at | 1462.7 | 2009.1 | 1426.5 | 1945   | 1446.4 | 2116.2 | 1836.6 | 1882.5 | 0.616869766 | 1710.825 | 1820.425 | 109.6   | 0.939794279 | 0.6095   | -1.067 |
| 162460_f_at | 234.6  | 150    | 133.4  | 210.9  | 114.6  | 177    | 140.9  | 213.5  | 0.54568108  | 182.225  | 161.5    | 20.725  | 1.128328173 | 0.5495   | -1.129 |
| 162461_at   | 68.5   | 55.2   | 82.2   | 73.2   | 53.1   | 61.6   | 79.4   | 112.4  | 0.656094008 | 69.775   | 76.625   | 6.85    | 0.910603589 | 0.7475   | -1.064 |
| 162462_r_at | 45.3   | 114.3  | 55.2   | 83.9   | 154.3  | 85.2   | 124.5  | 71.2   | 0.214342623 | 74.675   | 108.8    | 34.125  | 0.686351103 | 0.1968   | 1.485  |
| 162463_at   | 163.3  | 136.9  | 161.6  | 139.6  | 145.2  | 167.5  | 180.1  | 94.5   | 0.869937308 | 150.35   | 146.825  | 3.525   | 1.024008173 | 0.7567   | -1.05  |
| 162464_f_at | 165.6  | 168.2  | 173.7  | 188.2  | 174.4  | 139.9  | 162.1  | 196.7  | 0.683569182 | 173.925  | 168.275  | 5.65    | 1.033575992 | 0.6256   | -1.04  |
| 162465_i_at | 1.6    | 10.9   | 10     | 18.9   | 38.8   | 3.9    | 2.4    | 9.7    | 0.734681344 | 10.35    | 13.7     | 3.35    | 0.755474453 | 0.9888   | -1.012 |
| 162466_at   | 367.2  | 273.5  | 381.9  | 302.1  | 495.7  | 341.5  | 376.1  | 319.8  | 0.316287317 | 331.175  | 383.275  | 52.1    | 0.864066271 | 0.3023   | 1.151  |
| 162467_r_at | 70.5   | 38.4   | 101.8  | 21     | 24.1   | 16.2   | 45.8   | 23.8   | 0.188274114 | 57.925   | 27.475   | 30.45   | 2.108280255 | 0.1617   | -1.918 |
| 162468_at   | 558.6  | 549.3  | 683.8  | 709.1  | 882.2  | 687.6  | 638.3  | 650.5  | 0.254846471 | 625.2    | 714.65   | 89.45   | 0.874833835 | 0.2366   | 1.141  |
| 162469_r_at | 1316.9 | 1467.5 | 1726   | 1517.7 | 1526.6 | 1630.3 | 1531.2 | 1576.2 | 0.543699728 | 1507.025 | 1566.075 | 59.05   | 0.962294271 | 0.4876   | -1.044 |
| 162470_at   | 178.5  | 200.5  | 327.8  | 227    | 353.7  | 221.2  | 271.8  | 273.5  | 0.320033511 | 233.45   | 280.05   | 46.6    | 0.833601143 | 0.2758   | 1.216  |
| 162471_i_at | 12.8   | 7.4    | 20.9   | 18.1   | 36.2   | 1.7    | 16.6   | 23     | 0.587244055 | 14.8     | 19.375   | 4.575   | 0.763870968 | 0.8898   | -1.109 |
| 162472_f_at | 40.5   | 22.5   | 40     | 10.9   | 36.2   | 53.3   | 39     | 26     | 0.311695888 | 28.475   | 38.625   | 10.15   | 0.737216828 | 0.2897   | 1.49   |
| 162473_r_at | 3.6    | 3      | 2.7    | 5.2    | 8.3    | 5.4    | 4.1    | 10.8   | 0.095727633 | 3.625    | 7.15     | 3.525   | 0.506993007 | 0.04501  | 1.914  |
| 162474_f_at | 11.9   | 7.2    | 8.5    | 20.3   | 36     | 13.6   | 19.2   | 13.3   | 0.22337916  | 11.975   | 20.525   | 8.55    | 0.583434836 | 0.1541   | 1.703  |
| 162475_f_at | 3.9    | 26.8   | 26.3   | 4.3    | 6.3    | 23.2   | 10.6   | 29.8   | 0.808352331 | 15.325   | 17.475   | 2.15    | 0.876967096 | 0.616    | 1.408  |
| 162476_r_at | 28.3   | 37.7   | 55.4   | 48.6   | 41.9   | 45.3   | 36.3   | 9.5    | 0.397634762 | 42.5     | 33.25    | 9.25    | 1.278195489 | 0.3883   | -1.446 |
| 162477_r_at | 43.9   | 23     | 57.2   | 19.9   | 28.5   | 42     | 29.5   | 33.8   | 0.79994993  | 36       | 33.45    | 2.55    | 1.076233184 | 0.9722   | -1.01  |
| 162478_r_at | 40.3   | 16.4   | 24.4   | 30.5   | 26.7   | 5.3    | 7.7    | 26.2   | 0.187833785 | 27.9     | 16.475   | 11.425  | 1.693474962 | 0.1712   | -2.041 |
| 162479_f_at | 661.6  | 533.2  | 631.9  | 590.7  | 786.5  | 691.5  | 865.1  | 859.1  | 0.009183397 | 604.35   | 800.55   | 196.2   | 0.754918494 | 0.007148 | 1.324  |
| 162480_f_at | 6.9    | 5.5    | 8.2    | 10.4   | 9      | 7.2    | 5.7    | 52.3   | 0.40929801  | 7.75     | 18.55    | 10.8    | 0.417789757 | 0.4279   | 1.56   |
| 162481_f_at | 81.4   | 121.3  | 121.4  | 125.3  | 165.9  | 135.6  | 215.8  | 239.1  | 0.038745083 | 112.35   | 189.1    | 76.75   | 0.59413009  | 0.02088  | 1.667  |
| 162482_at   | 934.5  | 955.6  | 942.5  | 1049.3 | 869.8  | 835.5  | 926.9  | 965.1  | 0.120612598 | 970.475  | 899.325  | 71.15   | 1.079114892 | 0.1171   | -1.08  |
| 162483_f_at | 199.3  | 247.2  | 202.1  | 248.6  | 324.9  | 264.2  | 249.4  | 274.3  | 0.04606331  | 224.3    | 278.2    | 53.9    | 0.806254493 | 0.04127  | 1.241  |
| 162484_r_at | 107    | 94.3   | 156.4  | 57     | 77.8   | 61.3   | 132.7  | 97.9   | 0.677425836 | 103.675  | 92.425   | 11.25   | 1.121720314 | 0.7376   | -1.098 |
| 162485_at   | 9.5    | 21.6   | 9.5    | 19.3   | 14.3   | 23     | 6.7    | 14.2   | 0.929653109 | 14.975   | 14.55    | 0.425   | 1.029209622 | 0.8943   | -1.048 |
| 162486_f_at | 761.9  | 730.9  | 724.6  | 778.1  | 867    | 735.6  | 851.9  | 823.3  | 0.090775639 | 748.875  | 819.45   | 70.575  | 0.91387516  | 0.07203  | -1.093 |
| 162487_f_at | 296.2  | 305.9  | 272.8  | 275.6  | 299.4  | 302.2  | 278.5  | 416.8  | 0.331089133 | 287.625  | 324.225  | 36.6    | 0.887115429 | 0.2932   | 1.114  |
| 162488_at   | 24.4   | 32     | 13.6   | 32.3   | 11.3   | 30.2   | 24.3   | 29.4   | 0.784018064 | 25.575   | 23.8     | 1.775   | 1.074579832 | 0.7871   | -1.09  |
| 162489_i_at | 606.1  | 483.3  | 543.8  | 526.9  | 606.9  | 648.2  | 634.2  | 720.1  | 0.018636828 | 540.025  | 652.35   | 112.325 | 0.827814823 | 0.01826  | 1.21   |
| 162490_f_at | 77.8   | 30.8   | 65.5   | 111.2  | 90.7   | 74.4   | 126.2  | 63.4   | 0.452151108 | 71.325   | 88.675   | 17.35   | 0.804341697 | 0.3955   | 1.326  |
| 162491_f_at | 64.6   | 54.3   | 71.8   | 55.4   | 69.1   | 90.6   | 72.1   | 17.7   | 0.960999489 | 61.525   | 62.375   | 0.85    | 0.986372745 | 0.7243   | -1.15  |
| 162492_at   | 27.5   | 10.4   | 14.8   | 88.6   | 22.8   | 33.1   | 21.1   | 24.9   | 0.626678261 | 35.325   | 25.475   | 9.85    | 1.386653582 | 0.9786   | -1.014 |
| 162493_r_at | 58.4   | 107.4  | 113.7  | 121.5  | 76.3   | 102.5  | 92     | 120.6  | 0.893146862 | 100.25   | 97.85    | 2.4     | 1.024527338 | 0.9982   | -1     |
| 162494_at   | 32.4   | 14.9   | 28.4   | 40.5   | 38.3   | 45.3   | 33.8   | 49.1   | 0.1034359   | 29.05    | 41.625   | 12.575  | 0.697897898 | 0.1238   | 1.51   |
| 162495_r_at | 4.7    | 1.6    | 1.4    | 1.1    | 4.5    | 3.3    | 5.8    | 1.9    | 0.206490423 | 2.2      | 3.875    | 1.675   | 0.567741935 | 0.145    | 1.95   |
| 162496_r_at | 180.8  | 253    | 274.2  | 233.9  | 465.1  | 234.5  | 324.9  | 278.3  | 0.170300624 | 235.475  | 325.7    | 90.225  | 0.722981271 | 0.1277   | 1.354  |
| 162497_r_at | 864.3  | 610.3  | 864.1  | 1008.8 | 594.2  | 795.1  | 630.7  | 699.6  | 0.160816728 | 836.875  | 679.9    | 156.975 | 1.230879541 | 0.1618   | -1.219 |
| 162498_r_at | 51.3   | 43.8   | 28.8   | 40.2   | 62.5   | 24     | 36.9   | 40.2   | 0.989783771 | 41.025   | 40.9     | 0.125   | 1.003056235 | 0.8725   | -1.039 |
| 162499_f_at | 126.3  | 222.6  | 177.5  | 155.3  | 114.6  | 172    | 186.6  | 205.4  | 0.978974741 | 170.425  | 169.65   | 0.775   | 1.004568229 | 0.9722   | -1.006 |
| 162500_f_at | 194.9  | 112.9  | 162.4  | 207.8  | 227.8  | 202.6  | 241.9  | 230.5  | 0.07022494  | 169.5    | 225.7    | 56.2    | 0.750996899 | 0.07131  | 1.365  |
| 162501_at   | 143.5  | 145.9  | 141.1  | 213.9  | 181.3  | 155.5  | 121.7  | 264.4  | 0.601909979 | 161.1    | 180.725  | 19.625  | 0.8914096   | 0.653    | 1.094  |
| 162502_f_at | 59.6   | 77.6   | 95.9   | 107.9  | 105.4  | 68     | 65.9   | 79.8   | 0.708309682 | 85.25    | 79.775   | 5.475   | 1.068630523 | 0.7349   | -1.062 |
| 162503_f_at | 45.7   | 52.2   | 48     | 43.7   | 40.7   | 51.9   | 34.8   | 63.4   | 0.966115834 | 47.4     | 47.7     | 0.3     | 0.993710692 | 0.9005   | -1.018 |



|            |        |        |        |        |        |        |        |        |             |          |          |         |             |          |        |
|------------|--------|--------|--------|--------|--------|--------|--------|--------|-------------|----------|----------|---------|-------------|----------|--------|
| 162504_at  | 42.3   | 52.3   | 53.7   | 47.3   | 100.4  | 30.1   | 85.5   | 71.1   | 0.227929245 | 48.9     | 71.775   | 22.875  | 0.681295716 | 0.3215   | 1.345  |
| 92180_at   | 553.9  | 697.9  | 792.3  | 591.6  | 592.9  | 719.1  | 611.6  | 517.9  | 0.503970958 | 658.925  | 610.375  | 48.55   | 1.079541266 | 0.5116   | -1.076 |
| 92181_at   | 173    | 125.6  | 87.8   | 41.8   | 73.5   | 107.3  | 57.8   | 120.8  | 0.610418784 | 107.05   | 89.85    | 17.2    | 1.191430161 | 0.7997   | -1.097 |
| 92182_at   | 360.2  | 313.2  | 277.4  | 239.6  | 248    | 297.2  | 253.7  | 293.4  | 0.437705272 | 297.6    | 273.075  | 24.525  | 1.089810492 | 0.4609   | -1.081 |
| 92183_at   | 186.4  | 193.2  | 233.3  | 356.2  | 159.4  | 173.3  | 139    | 290.5  | 0.359433462 | 242.275  | 190.55   | 51.725  | 1.271451063 | 0.3029   | -1.28  |
| 92184_at   | 157.2  | 153.5  | 142.6  | 310.1  | 97.2   | 93.3   | 70.5   | 85.1   | 0.077727349 | 190.85   | 86.525   | 104.325 | 2.20572089  | 0.008745 | -2.104 |
| 92185_at   | 174.8  | 146    | 186.7  | 161.3  | 194.5  | 217.2  | 122.8  | 164.1  | 0.754019566 | 167.2    | 174.65   | 7.45    | 0.957343258 | 0.8557   | -1.026 |
| 92186_at   | 156.8  | 253.3  | 181.6  | 206    | 175.2  | 251.4  | 191.2  | 247.8  | 0.570887956 | 199.425  | 216.4    | 16.975  | 0.921557301 | 0.558    | -1.088 |
| 92188_s_at | 62.6   | 78.1   | 77.9   | 108.2  | 57.4   | 73.7   | 125.7  | 146.8  | 0.452226449 | 81.7     | 100.9    | 19.2    | 0.809712587 | 0.5428   | 1.173  |
| 92189_at   | 534.8  | 472.1  | 461.2  | 499.9  | 391.3  | 526.1  | 407    | 466.9  | 0.265775998 | 492      | 447.825  | 44.175  | 1.098643443 | 0.2347   | -1.105 |
| 92190_at   | 206.2  | 181.6  | 173.5  | 210.2  | 159.1  | 203.4  | 204.5  | 239.5  | 0.662327613 | 192.875  | 201.625  | 8.75    | 0.956602604 | 0.7128   | -1.038 |
| 92191_at   | 274.5  | 302.3  | 257.2  | 296.5  | 277    | 246    | 251.3  | 296.8  | 0.381861723 | 282.625  | 267.775  | 14.85   | 1.055457007 | 0.3759   | -1.056 |
| 92192_s_at | 248.2  | 257.1  | 237.1  | 224.8  | 241.6  | 311.3  | 320.5  | 288.4  | 0.063490222 | 241.8    | 290.45   | 48.65   | 0.832501291 | 0.04285  | 1.196  |
| 92193_r_at | 149.9  | 136.7  | 139.4  | 150.8  | 157.4  | 161.6  | 178    | 145.5  | 0.088668643 | 144.2    | 160.625  | 16.425  | 0.897743191 | 0.07138  | 1.112  |
| 92194_at   | 174.2  | 112.9  | 137.6  | 157.7  | 91.3   | 122.9  | 123.6  | 140.8  | 0.175621452 | 145.6    | 119.65   | 25.95   | 1.216882574 | 0.1866   | -1.216 |
| 92195_at   | 106    | 152.9  | 146.9  | 186.1  | 140.4  | 177.5  | 104.1  | 145.5  | 0.793422449 | 147.975  | 141.875  | 6.1     | 1.042995595 | 0.8115   | -1.041 |
| 92196_f_at | 1807   | 2876.4 | 2574.1 | 2938.1 | 1702.7 | 2209.8 | 1911.4 | 2462.6 | 0.181460629 | 2548.9   | 2071.625 | 477.275 | 1.230386774 | 0.2005   | -1.221 |
| 92197_r_at | 899.4  | 1077.6 | 1228   | 1241.2 | 1114   | 1263.7 | 1247.3 | 882.3  | 0.902040552 | 1111.55  | 1126.825 | 15.275  | 0.986444213 | 0.9191   | -1.012 |
| 92198_s_at | 126.7  | 95     | 117.8  | 119.8  | 142.8  | 169.6  | 131.3  | 129.6  | 0.0514166   | 114.825  | 143.325  | 28.5    | 0.80115123  | 0.04615  | 1.248  |
| 92199_at   | 125.7  | 135.5  | 150.2  | 167.5  | 122.1  | 124.5  | 114.1  | 117.7  | 0.066347985 | 144.725  | 119.6    | 25.125  | 1.210075251 | 0.02985  | -1.204 |
| 92200_at   | 65.2   | 18.9   | 4.3    | 33.3   | 53.6   | 35.6   | 11.3   | 96.9   | 0.431060004 | 30.425   | 49.35    | 18.925  | 0.616514691 | 0.4323   | 1.858  |
| 92201_at   | 28.6   | 65.9   | 31.3   | 34.3   | 50.5   | 82.8   | 68.8   | 23     | 0.342281209 | 40.025   | 56.275   | 16.25   | 0.711239449 | 0.4162   | 1.346  |
| 92202_g_at | 88.4   | 199.1  | 161.8  | 172.7  | 91.5   | 90.9   | 111.5  | 42.5   | 0.050488234 | 155.5    | 84.1     | 71.4    | 1.848989298 | 0.06401  | -1.879 |
| 92203_s_at | 2.3    | 16.3   | 5.5    | 3.3    | 23.3   | 5      | 5.9    | 18.3   | 0.307853149 | 6.85     | 13.125   | 6.275   | 0.521904762 | 0.2534   | 2.079  |
| 92204_at   | 61.2   | 65.5   | 72.4   | 63.7   | 68.3   | 61.9   | 68     | 39.7   | 0.437273847 | 65.7     | 59.475   | 6.225   | 1.104665826 | 0.404    | -1.128 |
| 92205_at   | 106.9  | 81.6   | 96.9   | 45.7   | 35.4   | 53.3   | 53.6   | 42.1   | 0.066030368 | 82.775   | 46.1     | 36.675  | 1.795553145 | 0.04275  | -1.735 |
| 92206_at   | 87.5   | 82.3   | 91.3   | 91.2   | 89.3   | 90     | 80     | 97.4   | 0.801648574 | 88.075   | 89.175   | 1.1     | 0.987664704 | 0.8298   | -1.011 |
| 92207_at   | 326.8  | 489.6  | 457.8  | 399.1  | 419.8  | 748.4  | 572.2  | 464.2  | 0.172237289 | 418.325  | 551.15   | 132.825 | 0.759003901 | 0.1436   | 1.3    |
| 92208_at   | 444.4  | 544.9  | 560.5  | 800.2  | 513.4  | 565.8  | 551    | 554    | 0.623080848 | 587.5    | 546.05   | 41.45   | 1.0759088   | 0.6965   | -1.052 |
| 92209_at   | 176.1  | 255.1  | 256.2  | 162.7  | 199.5  | 193.2  | 181.5  | 208.6  | 0.555170398 | 212.525  | 195.7    | 16.825  | 1.085973429 | 0.6319   | -1.064 |
| 92210_at   | 228.5  | 132.9  | 185.8  | 143.1  | 202.9  | 240.8  | 203.8  | 214.9  | 0.143182443 | 172.575  | 215.6    | 43.025  | 0.800440631 | 0.111    | 1.276  |
| 92211_at   | 402.9  | 340.6  | 395.8  | 444.2  | 301.2  | 373.4  | 309.2  | 448.6  | 0.391497465 | 395.875  | 358.1    | 37.775  | 1.105487294 | 0.3508   | -1.115 |
| 92212_at   | 63.8   | 66.4   | 72.1   | 91.4   | 73.7   | 50.5   | 70.3   | 64.5   | 0.325033543 | 73.425   | 64.75    | 8.675   | 1.133976834 | 0.3207   | -1.134 |
| 92213_at   | 710.1  | 435.6  | 613.6  | 600.7  | 604.1  | 769.7  | 595.9  | 504.8  | 0.730468887 | 590      | 618.625  | 28.625  | 0.953728026 | 0.7174   | -1.052 |
| 92214_at   | 16.6   | 12.7   | 13.9   | 18.3   | 11.8   | 15.7   | 15     | 14.3   | 0.475381493 | 15.375   | 14.2     | 1.175   | 1.082746479 | 0.5059   | -1.076 |
| 92215_at   | 5.3    | 4.9    | 11     | 7.5    | 7.6    | 8.8    | 10.5   | 9.4    | 0.278784335 | 7.175    | 9.075    | 1.9     | 0.790633609 | 0.2047   | 1.322  |
| 92216_at   | 374.1  | 826.2  | 442.8  | 540.8  | 764.3  | 572.2  | 508.2  | 549.9  | 0.665809933 | 545.975  | 598.65   | 52.675  | 0.912010357 | 0.5393   | 1.134  |
| 92217_s_at | 23.5   | 12.7   | 33.6   | 33.7   | 38.5   | 38.1   | 12.5   | 41     | 0.459282077 | 25.875   | 32.525   | 6.65    | 0.795541891 | 0.6075   | 1.221  |
| 92218_at   | 5.1    | 3.5    | 11.2   | 8.6    | 20.3   | 6.9    | 4.6    | 7.8    | 0.512786165 | 7.1      | 9.9      | 2.8     | 0.717171717 | 0.534    | 1.311  |
| 92219_s_at | 7.4    | 1.8    | 5.3    | 3.4    | 3.1    | 2.5    | 3.2    | 4.7    | 0.445419742 | 4.475    | 3.375    | 1.1     | 1.325925926 | 0.5899   | -1.205 |
| 92220_s_at | 822.4  | 962.3  | 782.7  | 806.7  | 932.5  | 974.2  | 1080.5 | 952.8  | 0.036409609 | 843.525  | 985      | 141.475 | 0.856370558 | 0.03235  | 1.17   |
| 92222_f_at | 57     | 66.6   | 64.1   | 46.6   | 71     | 130.7  | 122.6  | 90.5   | 0.042166429 | 58.575   | 103.7    | 45.125  | 0.56485053  | 0.01463  | 1.736  |
| 92223_at   | 675.4  | 587.4  | 678.8  | 553.9  | 887.3  | 659.6  | 538.6  | 671    | 0.454654955 | 623.875  | 689.125  | 65.25   | 0.905314711 | 0.4744   | -1.091 |
| 92224_at   | 28.5   | 61.5   | 22.4   | 97     | 67     | 43     | 38.6   | 22.9   | 0.648723586 | 52.35    | 42.875   | 9.475   | 1.220991254 | 0.8129   | -1.105 |
| 92225_f_at | 219.2  | 357.7  | 269.9  | 343.3  | 368.1  | 345.9  | 414.8  | 465    | 0.054032856 | 297.525  | 398.45   | 100.925 | 0.746705986 | 0.05978  | 1.356  |
| 92226_at   | 2322.2 | 1644.3 | 1975.7 | 1869.5 | 1396.1 | 1969.2 | 1943.3 | 1705.3 | 0.343719674 | 1952.925 | 1753.475 | 199.45  | 1.113745562 | 0.3472   | -1.115 |
| 92227_s_at | 235.6  | 166.1  | 240.2  | 247.9  | 81.7   | 173.3  | 174.9  | 108.2  | 0.028245293 | 222.45   | 134.525  | 87.925  | 1.653595986 | 0.04143  | -1.717 |
| 92228_at   | 620.5  | 526.6  | 644.3  | 603.1  | 280.7  | 485.1  | 463.3  | 286    | 0.020567401 | 598.625  | 378.775  | 219.85  | 1.580423734 | 0.02004  | -1.629 |
| 92229_at   | 13.2   | 63     | 15.5   | 76.8   | 91.7   | 77.3   | 21.4   | 58.4   | 0.40259935  | 42.125   | 62.2     | 20.075  | 0.677250804 | 0.3677   | 1.73   |
| 92230_at   | 115.5  | 76.4   | 115.7  | 111.2  | 100.4  | 116.2  | 110.3  | 78.4   | 0.798131967 | 104.7    | 101.325  | 3.375   | 1.03330866  | 0.8328   | -1.03  |
| 92231_at   | 86.2   | 126.7  | 131.1  | 100.3  | 87.2   | 136.4  | 141.9  | 115.3  | 0.598399767 | 111.075  | 120.2    | 9.125   | 0.924084859 | 0.6297   | -1.078 |
| 92232_at   | 52.3   | 87.1   | 98.3   | 92.8   | 162.6  | 180.1  | 135    | 124.3  | 0.006697003 | 82.625   | 150.5    | 67.875  | 0.549003322 | 0.01037  | 1.854  |
| 92233_at   | 503.9  | 846    | 677.7  | 765.7  | 706.4  | 845.8  | 745.8  | 760.9  | 0.448715999 | 698.325  | 764.725  | 66.4    | 0.913171401 | 0.4023   | 1.113  |
| 92234_at   | 361.6  | 490.8  | 444.9  | 420.9  | 507.7  | 470.4  | 462.2  | 541.9  | 0.095298798 | 429.55   | 495.55   | 66      | 0.86681465  | 0.09304  | 1.158  |
| 92235_g_at | 184.4  | 254.1  | 250.1  | 251.2  | 243    | 287.1  | 269.1  | 206.2  | 0.525794238 | 234.95   | 251.35   | 16.4    | 0.934752337 | 0.5429   | -1.071 |
| 92237_at   | 5.1    | 8      | 10     | 6.1    | 4.6    | 5.2    | 6      | 15.7   | 0.849376373 | 7.3      | 7.875    | 0.575   | 0.926984127 | 0.9323   | -1.029 |



|            |        |       |       |        |       |       |       |        |             |         |         |         |             |         |        |
|------------|--------|-------|-------|--------|-------|-------|-------|--------|-------------|---------|---------|---------|-------------|---------|--------|
| 92238_at   | 7.2    | 7.6   | 11.8  | 15.3   | 17.3  | 6.4   | 11.6  | 15.7   | 0.491726165 | 10.475  | 12.75   | 2.275   | 0.821568627 | 0.5577  | 1.195  |
| 92239_at   | 6      | 7.1   | 10.8  | 11.4   | 13.2  | 10.6  | 8     | 4.2    | 0.943106262 | 8.825   | 9       | 0.175   | 0.980555556 | 0.9256  | -1.029 |
| 92240_at   | 18.8   | 28    | 29.6  | 52.6   | 36.9  | 18.7  | 22.9  | 18.6   | 0.386145848 | 32.25   | 24.275  | 7.975   | 1.328527291 | 0.3707  | -1.294 |
| 92241_at   | 500.4  | 914.4 | 739.7 | 948.5  | 823.3 | 677.2 | 813.4 | 937.4  | 0.762641028 | 775.75  | 812.825 | 37.075  | 0.954387476 | 0.6785  | -1.073 |
| 92242_at   | 8.5    | 6.2   | 6.3   | 6.9    | 9.4   | 8.1   | 19.6  | 36.8   | 0.18096464  | 6.975   | 18.475  | 11.5    | 0.377537212 | 0.06774 | 2.214  |
| 92243_at   | 968.4  | 849.6 | 945.9 | 1004.4 | 770.4 | 860   | 953.6 | 869.7  | 0.167406249 | 942.075 | 863.425 | 78.65   | 1.091090714 | 0.1705  | -1.092 |
| 92244_at   | 167.7  | 94.9  | 165.8 | 196.6  | 170.1 | 104.9 | 104.2 | 129.2  | 0.319178641 | 156.25  | 127.1   | 29.15   | 1.229346971 | 0.3657  | -1.212 |
| 92245_at   | 298.3  | 261   | 284   | 291.5  | 314.4 | 314.9 | 276   | 355.7  | 0.151108369 | 283.7   | 315.25  | 31.55   | 0.899920698 | 0.1351  | 1.108  |
| 92246_at   | 84     | 55    | 80    | 83.7   | 71.3  | 69    | 69.7  | 79.1   | 0.668967897 | 75.675  | 72.275  | 3.4     | 1.047042546 | 0.7653  | -1.034 |
| 92247_at   | 360.2  | 372.8 | 338.1 | 497.6  | 210.4 | 311.6 | 178.1 | 251.1  | 0.016383632 | 392.175 | 237.8   | 154.375 | 1.649179983 | 0.01343 | -1.666 |
| 92248_at   | 58.7   | 42.3  | 58.8  | 60.1   | 50.6  | 52.9  | 32.5  | 64.7   | 0.568916102 | 54.975  | 50.175  | 4.8     | 1.095665172 | 0.5323  | -1.117 |
| 92249_g_at | 44.4   | 32.3  | 50    | 37.1   | 61.7  | 40.3  | 65.7  | 64.8   | 0.060286882 | 40.95   | 58.125  | 17.175  | 0.704516129 | 0.06246 | 1.414  |
| 92250_s_at | 41     | 99.9  | 81.8  | 121.2  | 122.7 | 75.5  | 71.5  | 120.1  | 0.620573799 | 85.975  | 97.45   | 11.475  | 0.882247306 | 0.5671  | 1.183  |
| 92251_f_at | 47     | 27.6  | 23.4  | 25.2   | 16.7  | 34.3  | 42.4  | 23.2   | 0.841726723 | 30.8    | 29.15   | 1.65    | 1.056603774 | 0.7811  | -1.079 |
| 92252_at   | 14.2   | 33.9  | 5.5   | 5.1    | 9.2   | 30.6  | 7.1   | 46.6   | 0.482878094 | 14.675  | 23.375  | 8.7     | 0.627807487 | 0.4752  | 1.626  |
| 92253_at   | 80.7   | 60.7  | 46.8  | 58     | 12.5  | 64.4  | 44    | 91.5   | 0.664649254 | 61.55   | 53.1    | 8.45    | 1.15913371  | 0.4613  | -1.423 |
| 92254_at   | 285.1  | 239.4 | 265.6 | 198.4  | 280.9 | 220   | 323.1 | 259.6  | 0.436976249 | 247.125 | 270.9   | 23.775  | 0.912236988 | 0.4469  | -1.096 |
| 92255_at   | 9.4    | 8.6   | 15    | 11.1   | 20.2  | 33.5  | 13.8  | 11.3   | 0.178819354 | 11.025  | 19.7    | 8.675   | 0.55964467  | 0.1053  | 1.67   |
| 92256_at   | 130    | 131.8 | 138.9 | 127.9  | 150.1 | 165.8 | 156.5 | 164.7  | 0.001488112 | 132.15  | 159.275 | 27.125  | 0.829697065 | 0.00074 | 1.205  |
| 92257_at   | 310.4  | 217.5 | 223.9 | 235.7  | 168.7 | 245.8 | 212.2 | 261    | 0.432940794 | 246.875 | 221.925 | 24.95   | 1.112425369 | 0.4198  | -1.116 |
| 92258_at   | 690.2  | 694.6 | 756.9 | 718    | 579.9 | 645.7 | 566   | 1576.9 | 0.640576574 | 714.925 | 842.125 | 127.2   | 0.84895354  | 0.8085  | -1.064 |
| 92259_at   | 447.8  | 359.4 | 601.2 | 376.4  | 331.7 | 416.9 | 334.6 | 481.9  | 0.441149282 | 446.2   | 391.275 | 54.925  | 1.140374417 | 0.4377  | -1.131 |
| 92260_at   | 16.1   | 12.4  | 16.3  | 17.9   | 25.3  | 14.1  | 21.3  | 15     | 0.324261856 | 15.675  | 18.925  | 3.25    | 0.828269485 | 0.34    | 1.182  |
| 92261_at   | 229.4  | 294.5 | 258.2 | 247.7  | 241   | 268.7 | 273.1 | 262.3  | 0.8152745   | 257.45  | 261.275 | 3.825   | 0.985360253 | 0.7743  | -1.018 |
| 92262_at   | 264.2  | 206.2 | 204.8 | 342.7  | 294.3 | 254.7 | 255.3 | 280.3  | 0.65205947  | 254.475 | 271.15  | 16.675  | 0.938502674 | 0.5311  | -1.088 |
| 92263_at   | 548.8  | 780.8 | 634.4 | 521.8  | 830.6 | 768.4 | 841.6 | 779.7  | 0.045735118 | 621.45  | 805.075 | 183.625 | 0.77191566  | 0.02708 | 1.311  |
| 92264_at   | 10.2   | 11.9  | 10.4  | 14.6   | 10.7  | 10.8  | 13.7  | 11.7   | 0.969076772 | 11.775  | 11.725  | 0.05    | 1.004264392 | 0.9925  | -1.001 |
| 92265_f_at | 495.4  | 413.7 | 327.8 | 338.7  | 728.7 | 498.3 | 339.5 | 300.4  | 0.525670137 | 393.9   | 466.725 | 72.825  | 0.843965933 | 0.6037  | -1.13  |
| 92266_at   | 5.9    | 5.5   | 6.3   | 6.4    | 7.7   | 9.5   | 6.4   | 11.1   | 0.079450745 | 6.025   | 8.675   | 2.65    | 0.694524496 | 0.03135 | 1.417  |
| 92267_at   | 423.3  | 406.2 | 508.6 | 456.9  | 343.4 | 428.8 | 298.1 | 355.2  | 0.040803559 | 448.75  | 356.375 | 92.375  | 1.259207296 | 0.03941 | -1.265 |
| 92268_at   | 1031.1 | 832.3 | 925.1 | 971.5  | 769   | 999.2 | 990.1 | 961.7  | 0.889136868 | 940     | 930     | 10      | 1.010752688 | 0.8695  | -1.013 |
| 92269_r_at | 46.9   | 80.8  | 71.5  | 76.2   | 74.2  | 71.6  | 44.3  | 41.8   | 0.380922983 | 68.85   | 57.975  | 10.875  | 1.187580854 | 0.3801  | -1.205 |
| 92270_at   | 1126.8 | 843.6 | 918.6 | 924.2  | 945.2 | 940.7 | 978.9 | 960.3  | 0.964227461 | 953.3   | 956.275 | 2.975   | 0.99688897  | 0.8929  | -1.009 |
| 92271_at   | 27.2   | 31.6  | 31.7  | 32.5   | 43    | 35.5  | 33.8  | 50.2   | 0.073748494 | 30.75   | 40.625  | 9.875   | 0.756923077 | 0.03608 | 1.308  |
| 92272_at   | 128.8  | 128.8 | 118.9 | 197    | 110.5 | 161.9 | 115   | 174.2  | 0.906322791 | 143.375 | 140.4   | 2.975   | 1.021189459 | 0.9052  | -1.02  |
| 92273_at   | 157.7  | 110.1 | 165.8 | 191.3  | 184.5 | 172.6 | 182   | 218.3  | 0.154898505 | 156.225 | 189.35  | 33.125  | 0.825059414 | 0.1559  | 1.231  |
| 92274_at   | 10.3   | 8.8   | 16.9  | 4.5    | 26.5  | 6.8   | 17    | 12     | 0.318652947 | 10.125  | 15.575  | 5.45    | 0.650080257 | 0.3321  | 1.523  |
| 92275_at   | 24     | 107.8 | 43.3  | 30.9   | 32    | 31.2  | 27.4  | 36.3   | 0.379162836 | 51.5    | 31.725  | 19.775  | 1.623325453 | 0.3857  | -1.366 |
| 92276_at   | 34.2   | 57.1  | 43.3  | 33.2   | 111.5 | 134.9 | 38    | 122.2  | 0.06712451  | 41.95   | 101.65  | 59.7    | 0.412690605 | 0.04628 | 2.233  |
| 92277_at   | 2.5    | 3.8   | 2.3   | 14.9   | 5     | 4.5   | 4     | 6.2    | 0.775877226 | 5.875   | 4.925   | 0.95    | 1.192893401 | 0.775   | 1.141  |
| 92278_at   | 266.1  | 314.5 | 280.9 | 434.5  | 367.4 | 262.7 | 419.6 | 342.6  | 0.649315009 | 324     | 348.075 | 24.075  | 0.930833872 | 0.6223  | -1.08  |
| 92279_at   | 216.3  | 175.7 | 216.9 | 197.1  | 221.9 | 213.1 | 216.5 | 223    | 0.176752505 | 201.5   | 218.625 | 17.125  | 0.921669525 | 0.145   | -1.089 |
| 92280_at   | 167.8  | 220.5 | 201.1 | 93.3   | 86.7  | 169.3 | 135.4 | 151.5  | 0.339252896 | 170.675 | 135.725 | 34.95   | 1.257505986 | 0.4217  | -1.232 |
| 92281_at   | 164.2  | 197   | 189.8 | 146.7  | 211.6 | 215.8 | 177.8 | 193.2  | 0.13811184  | 174.425 | 199.6   | 25.175  | 0.873872745 | 0.1389  | 1.149  |
| 92282_at   | 244.1  | 465.8 | 269.2 | 527.2  | 307.6 | 308.8 | 391.2 | 468.8  | 0.929802169 | 376.575 | 369.1   | 7.475   | 1.020251964 | 0.9329  | -1.019 |
| 92283_s_at | 11.3   | 1.9   | 6.1   | 4.2    | 19    | 9.7   | 19.3  | 18.1   | 0.013167247 | 5.875   | 16.525  | 10.65   | 0.355521936 | 0.02667 | 3.278  |
| 92284_r_at | 3.5    | 7.5   | 6.1   | 15.5   | 16.5  | 3.9   | 4.3   | 23.7   | 0.507186502 | 8.15    | 12.1    | 3.95    | 0.673553719 | 0.6739  | 1.278  |
| 92285_at   | 6.9    | 8.9   | 24.9  | 8      | 29.1  | 5.3   | 7.4   | 8.9    | 0.945344446 | 12.175  | 12.675  | 0.5     | 0.960552268 | 0.9209  | -1.05  |
| 92286_g_at | 27.1   | 33.1  | 35.1  | 22.6   | 48.2  | 42.4  | 32    | 50.3   | 0.037300889 | 29.475  | 43.225  | 13.75   | 0.68189705  | 0.03702 | 1.465  |
| 92287_at   | 324.4  | 280.3 | 353.9 | 337.8  | 282.1 | 356.8 | 320.9 | 388.6  | 0.659394397 | 324.1   | 337.1   | 13      | 0.961435776 | 0.6895  | -1.037 |
| 92288_at   | 271    | 179.4 | 264.6 | 290.4  | 148.6 | 220.1 | 150.9 | 146.4  | 0.034824939 | 251.35  | 166.5   | 84.85   | 1.50960961  | 0.03104 | -1.508 |
| 92289_at   | 24.1   | 16    | 18.5  | 23.1   | 17.4  | 28.9  | 14    | 13.9   | 0.662741368 | 20.425  | 18.55   | 1.875   | 1.101078167 | 0.5351  | -1.139 |
| 92290_at   | 297.8  | 301.3 | 415   | 418.7  | 263.8 | 347.9 | 331.8 | 383.2  | 0.554063416 | 358.2   | 331.675 | 26.525  | 1.079972865 | 0.58    | -1.075 |
| 92291_f_at | 101.3  | 116.5 | 67    | 84.9   | 114.6 | 133.9 | 94.6  | 106.7  | 0.190736252 | 92.425  | 112.45  | 20.025  | 0.821920854 | 0.186   | 1.232  |
| 92292_at   | 142.2  | 136.5 | 146.4 | 131.2  | 139.8 | 231.7 | 156.4 | 150.1  | 0.243921981 | 139.075 | 169.5   | 30.425  | 0.820501475 | 0.1751  | 1.195  |
| 92293_at   | 8.9    | 9.6   | 11.6  | 12.9   | 14.6  | 18.1  | 12.1  | 46.8   | 0.228940867 | 10.75   | 22.9    | 12.15   | 0.469432314 | 0.09609 | 1.85   |



|            |        |        |        |        |        |        |        |        |             |          |          |         |             |          |        |
|------------|--------|--------|--------|--------|--------|--------|--------|--------|-------------|----------|----------|---------|-------------|----------|--------|
| 92294_at   | 262.8  | 331    | 372.3  | 417.9  | 189.1  | 392.7  | 204.1  | 254.9  | 0.187286271 | 346      | 260.2    | 85.8    | 1.329746349 | 0.1533   | -1.368 |
| 92295_at   | 11.6   | 26.8   | 14.4   | 9.2    | 7      | 9.5    | 19.3   | 7      | 0.366807363 | 15.5     | 10.7     | 4.8     | 1.448598131 | 0.289    | -1.471 |
| 92296_at   | 80     | 60.4   | 86.9   | 106.3  | 65.2   | 86.7   | 53.5   | 51.8   | 0.176459197 | 83.4     | 64.3     | 19.1    | 1.297045101 | 0.1668   | -1.3   |
| 92299_at   | 64.5   | 59.6   | 75.5   | 79.7   | 82.4   | 117.8  | 51     | 48.1   | 0.784730347 | 69.825   | 74.825   | 5       | 0.933177414 | 0.9749   | -1.007 |
| 92300_at   | 108.3  | 231.1  | 146.8  | 183.4  | 183.6  | 189.8  | 228.9  | 203.5  | 0.293739641 | 167.4    | 201.45   | 34.05   | 0.830975428 | 0.2405   | 1.246  |
| 92301_at   | 63.7   | 87.1   | 78.3   | 72.4   | 124.9  | 128.9  | 96.1   | 142.8  | 0.009670999 | 75.375   | 123.175  | 47.8    | 0.61193424  | 0.003886 | 1.628  |
| 92302_at   | 248.2  | 429.8  | 273.8  | 347.4  | 354.9  | 277.3  | 286.1  | 419.8  | 0.859876878 | 324.8    | 334.525  | 9.725   | 0.970928929 | 0.8164   | -1.039 |
| 92303_at   | 277.5  | 336.9  | 457.9  | 355.2  | 388.8  | 160.3  | 220.5  | 327.4  | 0.246623251 | 356.875  | 274.25   | 82.625  | 1.301276208 | 0.2236   | -1.356 |
| 92304_at   | 254.9  | 236.4  | 316    | 273.7  | 244.7  | 326.6  | 267.4  | 213    | 0.812539214 | 270.25   | 262.925  | 7.325   | 1.027859656 | 0.7654   | -1.035 |
| 92305_s_at | 34     | 24.3   | 54     | 40.9   | 51.6   | 25.6   | 81.2   | 19.3   | 0.711070038 | 38.3     | 44.425   | 6.125   | 0.862127181 | 0.9351   | -1.032 |
| 92306_at   | 329.2  | 193.9  | 411.8  | 475.3  | 213.4  | 446.4  | 376.6  | 380    | 0.984895384 | 352.55   | 354.1    | 1.55    | 0.995622705 | 0.9344   | -1.022 |
| 92307_at   | 129.8  | 160.1  | 161.1  | 128    | 100.8  | 130.4  | 114.8  | 114.9  | 0.041627625 | 144.75   | 115.225  | 29.525  | 1.256237796 | 0.03369  | -1.254 |
| 92308_at   | 152.8  | 171.8  | 153.2  | 202.7  | 111.9  | 180.4  | 135    | 162    | 0.279642689 | 170.125  | 147.325  | 22.8    | 1.154759885 | 0.2634   | -1.166 |
| 92309_i_at | 139    | 166.1  | 152.1  | 151.1  | 93.3   | 139.4  | 137    | 151.5  | 0.19032293  | 152.075  | 130.3    | 21.775  | 1.167114351 | 0.1888   | -1.184 |
| 92310_at   | 1183.1 | 1163.9 | 1069.5 | 906    | 515.7  | 811.6  | 582.9  | 824.8  | 0.008499475 | 1080.625 | 683.75   | 396.875 | 1.580438757 | 0.01204  | -1.605 |
| 92311_s_at | 84.1   | 71     | 92.3   | 86.1   | 25.6   | 71.6   | 55.4   | 23.4   | 0.036904665 | 83.375   | 44       | 39.375  | 1.894886364 | 0.03868  | -2.114 |
| 92312_at   | 154    | 110.5  | 163.1  | 133.9  | 91.9   | 170.4  | 87.4   | 87.6   | 0.246019591 | 140.375  | 109.325  | 31.05   | 1.28401555  | 0.1761   | -1.327 |
| 92313_at   | 70.2   | 76.1   | 54.2   | 81.7   | 73.7   | 72.1   | 66.6   | 84.6   | 0.620845984 | 70.55    | 74.25    | 3.7     | 0.95016835  | 0.5873   | -1.06  |
| 92314_at   | 45     | 44.6   | 49.7   | 74.7   | 63.9   | 67.1   | 38.2   | 59     | 0.726280004 | 53.5     | 57.05    | 3.55    | 0.937773883 | 0.7275   | -1.067 |
| 92315_at   | 79.1   | 72.5   | 40.3   | 73.7   | 89.8   | 75.7   | 75.9   | 85.3   | 0.184119019 | 66.4     | 81.675   | 15.275  | 0.812978268 | 0.1935   | 1.269  |
| 92316_f_at | 9.2    | 26.8   | 19.6   | 3.3    | 76.9   | 11.6   | 22.5   | 14.8   | 0.364554367 | 14.725   | 31.45    | 16.725  | 0.468203498 | 0.2888   | 2.076  |
| 92317_at   | 184.5  | 117.6  | 147.2  | 195.6  | 124.2  | 177.4  | 91.1   | 212.5  | 0.771351235 | 161.225  | 151.3    | 9.925   | 1.065598149 | 0.6822   | -1.1   |
| 92318_at   | 6      | 42.6   | 29.1   | 48     | 99.3   | 31.8   | 68.9   | 12.4   | 0.366296122 | 31.425   | 53.1     | 21.675  | 0.59180791  | 0.476    | 1.657  |
| 92319_i_at | 16.5   | 8      | 4.7    | 9.7    | 8.5    | 12.3   | 8.2    | 31.5   | 0.422090377 | 9.725    | 15.125   | 5.4     | 0.642975207 | 0.3909   | 1.455  |
| 92320_f_at | 23.7   | 29.5   | 28.3   | 45     | 49.5   | 34.9   | 32.3   | 29.2   | 0.480779157 | 31.625   | 36.475   | 4.85    | 0.867032214 | 0.4242   | 1.165  |
| 92321_r_at | 4.3    | 25.2   | 19.3   | 22.9   | 4.2    | 18.3   | 29.7   | 16.9   | 0.929294953 | 17.925   | 17.275   | 0.65    | 1.037626628 | 0.9361   | -1.051 |
| 92322_at   | 194.5  | 149.1  | 147    | 144    | 250.1  | 212    | 171.1  | 311.4  | 0.074346449 | 158.65   | 236.15   | 77.5    | 0.671818759 | 0.0393   | 1.464  |
| 92323_at   | 158.1  | 201.4  | 186.6  | 199.4  | 174.8  | 166.4  | 148    | 160.4  | 0.093764999 | 186.375  | 162.4    | 23.975  | 1.14762931  | 0.08695  | -1.145 |
| 92324_at   | 5.7    | 1.7    | 3.3    | 2.5    | 5.2    | 3.9    | 25.7   | 4.5    | 0.307144963 | 3.3      | 9.825    | 6.525   | 0.335877863 | 0.1464   | 2.316  |
| 92325_at   | 253.3  | 372.3  | 336.1  | 330.7  | 301.3  | 431.7  | 323    | 440.9  | 0.294363303 | 323.1    | 374.225  | 51.125  | 0.863384328 | 0.3089   | 1.153  |
| 92328_at   | 74.9   | 8.5    | 34.1   | 12.8   | 44.5   | 25     | 28.9   | 52.5   | 0.770374247 | 32.575   | 37.725   | 5.15    | 0.863485752 | 0.4215   | 1.566  |
| 92329_at   | 39.7   | 31.3   | 53.3   | 32.7   | 25.7   | 16.6   | 66.4   | 43.5   | 0.925396407 | 39.25    | 38.05    | 1.2     | 1.031537451 | 0.6816   | -1.151 |
| 92330_r_at | 64     | 48.3   | 76     | 89.1   | 96.6   | 80.2   | 54     | 74.8   | 0.589080907 | 69.35    | 76.4     | 7.05    | 0.907722513 | 0.594    | 1.106  |
| 92331_at   | 1244.9 | 901.4  | 1141.6 | 1255.3 | 599.6  | 1169.1 | 781.4  | 566    | 0.078738194 | 1135.8   | 779.025  | 356.775 | 1.457976317 | 0.06494  | -1.509 |
| 92332_at   | 8      | 8.2    | 4.3    | 16.5   | 10.5   | 19.9   | 6.4    | 13.4   | 0.422874486 | 9.25     | 12.55    | 3.3     | 0.737051793 | 0.3894   | 1.401  |
| 92333_at   | 20.2   | 27.2   | 27.2   | 37.6   | 27.4   | 4.4    | 34.6   | 45.2   | 0.98797885  | 28.05    | 27.9     | 0.15    | 1.005376344 | 0.6344   | -1.311 |
| 92334_at   | 36.2   | 11.3   | 31.1   | 16     | 17.2   | 23.2   | 22.8   | 66.2   | 0.530704697 | 23.65    | 32.35    | 8.7     | 0.731066461 | 0.5275   | 1.311  |
| 92335_at   | 116    | 190.2  | 139    | 185.3  | 205.5  | 216.7  | 215    | 224.6  | 0.046015146 | 157.625  | 215.45   | 57.825  | 0.731608262 | 0.03254  | 1.395  |
| 92336_at   | 134.3  | 90.2   | 105    | 50.8   | 93.2   | 106.5  | 118    | 115.4  | 0.513510037 | 95.075   | 108.275  | 13.2    | 0.878088201 | 0.4199   | 1.203  |
| 92337_g_at | 5.3    | 4.7    | 5.6    | 7.2    | 7.9    | 6.8    | 8      | 9.4    | 0.021597953 | 5.7      | 8.025    | 2.325   | 0.710280374 | 0.02131  | 1.412  |
| 92338_f_at | 395.9  | 261.5  | 319.6  | 428.8  | 271.4  | 423.4  | 322.2  | 315.7  | 0.725167524 | 351.45   | 333.175  | 18.275  | 1.054851054 | 0.7494   | -1.05  |
| 92339_at   | 128.9  | 216.9  | 152    | 143.9  | 213.4  | 250.2  | 283.4  | 242.1  | 0.013182266 | 160.425  | 247.275  | 86.85   | 0.648771611 | 0.01232  | 1.564  |
| 92340_at   | 56.1   | 49.7   | 46.2   | 65     | 12.8   | 97.2   | 56.1   | 25.8   | 0.763477739 | 54.25    | 47.975   | 6.275   | 1.13079729  | 0.4252   | -1.47  |
| 92341_at   | 7.9    | 10.3   | 10.3   | 5.2    | 13.8   | 8.5    | 7.8    | 5.2    | 0.860955679 | 8.425    | 8.825    | 0.4     | 0.954674221 | 0.9303   | -1.024 |
| 92342_at   | 37.2   | 25     | 37     | 19.1   | 22     | 16     | 13.8   | 25.2   | 0.106888181 | 29.575   | 19.25    | 10.325  | 1.536363636 | 0.09697  | -1.523 |
| 92343_at   | 160    | 89.8   | 130.7  | 142.4  | 120.5  | 154.4  | 147.7  | 128.5  | 0.69539674  | 130.725  | 137.775  | 7.05    | 0.948829614 | 0.6315   | -1.072 |
| 92344_at   | 27.1   | 30.4   | 64.4   | 58.3   | 58     | 58.9   | 55.2   | 93.5   | 0.155574139 | 45.05    | 66.4     | 21.35   | 0.678463855 | 0.1365   | 1.545  |
| 92345_g_at | 305.2  | 205.2  | 339.4  | 358.3  | 182.9  | 293.5  | 235.7  | 243.2  | 0.180769743 | 302.025  | 238.825  | 63.2    | 1.264628912 | 0.2042   | -1.254 |
| 92346_at   | 13.9   | 22.1   | 45.9   | 16.4   | 57.5   | 11.8   | 8.3    | 13     | 0.894176359 | 24.575   | 22.65    | 1.925   | 1.084988962 | 0.5875   | -1.334 |
| 92347_at   | 38.4   | 55.6   | 50.9   | 20.5   | 35.4   | 10.8   | 75.3   | 72.3   | 0.701460406 | 41.35    | 48.45    | 7.1     | 0.853457172 | 0.976    | -1.016 |
| 92348_at   | 1917.4 | 2797.7 | 3010.9 | 2463.1 | 2626.2 | 2775.8 | 3012.9 | 2127.2 | 0.781229306 | 2547.275 | 2635.525 | 88.25   | 0.96651521  | 0.7567   | -1.041 |
| 92349_at   | 12.6   | 24.1   | 12.8   | 16.6   | 9.8    | 18.7   | 10.7   | 44     | 0.64092114  | 16.525   | 20.8     | 4.275   | 0.794471154 | 0.8516   | -1.077 |
| 92350_at   | 983.1  | 926.6  | 966.1  | 963.5  | 666.2  | 1061.5 | 827.2  | 980.3  | 0.449567425 | 959.825  | 883.8    | 76.025  | 1.086020593 | 0.3827   | -1.103 |
| 92351_at   | 10.6   | 12.5   | 15.7   | 27.1   | 14.8   | 13     | 12.3   | 11     | 0.394154826 | 16.475   | 12.775   | 3.7     | 1.28962818  | 0.3994   | -1.213 |
| 92352_at   | 701    | 594.9  | 714.3  | 732.4  | 628.4  | 669.6  | 616.5  | 709.2  | 0.461243499 | 685.65   | 655.925  | 29.725  | 1.045317681 | 0.4819   | -1.044 |
| 92353_at   | 7      | 4.1    | 9.9    | 6.1    | 8.4    | 7.1    | 7.3    | 5.4    | 0.848074034 | 6.775    | 7.05     | 0.275   | 0.960992908 | 0.7265   | -1.077 |



|            |        |        |        |        |        |        |        |        |             |          |          |         |             |          |        |
|------------|--------|--------|--------|--------|--------|--------|--------|--------|-------------|----------|----------|---------|-------------|----------|--------|
| 92354_at   | 83.2   | 74.6   | 76.7   | 103.6  | 70.8   | 103.1  | 27     | 88.5   | 0.531501453 | 84.525   | 72.35    | 12.175  | 1.168279198 | 0.4341   | -1.296 |
| 92355_at   | 188.2  | 280.5  | 287.3  | 188.1  | 173.5  | 388.9  | 195.5  | 250.9  | 0.783869448 | 236.025  | 252.2    | 16.175  | 0.935864393 | 0.8688   | -1.038 |
| 92356_at   | 80.3   | 84.2   | 11.5   | 57.9   | 32.4   | 41.5   | 101.3  | 65.3   | 0.944429985 | 58.475   | 60.125   | 1.65    | 0.972557173 | 0.7606   | 1.186  |
| 92357_at   | 140.8  | 203    | 134.9  | 158    | 197.1  | 187.9  | 148.1  | 197.4  | 0.274360648 | 159.175  | 182.625  | 23.45   | 0.871594798 | 0.2562   | 1.155  |
| 92358_at   | 115.4  | 111.5  | 104    | 106.5  | 109.4  | 144.5  | 124    | 199.1  | 0.173395619 | 109.35   | 144.25   | 34.9    | 0.758058925 | 0.1037   | 1.286  |
| 92359_at   | 44     | 29.9   | 39.2   | 28.5   | 27.1   | 39.5   | 48.1   | 44.5   | 0.485585077 | 35.4     | 39.8     | 4.4     | 0.889447236 | 0.5257   | -1.117 |
| 92360_at   | 917.8  | 871    | 876.9  | 1088.1 | 710.5  | 913.7  | 793    | 915.3  | 0.19025574  | 938.45   | 833.125  | 105.325 | 1.126421605 | 0.1846   | -1.128 |
| 92361_at   | 4.8    | 26.1   | 4.1    | 17.3   | 8.2    | 7.6    | 5.7    | 8.9    | 0.378454391 | 13.075   | 7.6      | 5.475   | 1.720394737 | 0.6118   | -1.288 |
| 92362_at   | 25.5   | 58.5   | 51.1   | 55.6   | 16.4   | 31     | 50.9   | 51.2   | 0.398426639 | 47.675   | 37.375   | 10.3    | 1.275585284 | 0.4149   | -1.338 |
| 92363_at   | 42.2   | 50.5   | 121.6  | 69.9   | 47.9   | 49.1   | 61     | 85.7   | 0.634894141 | 71.05    | 60.925   | 10.125  | 1.166187936 | 0.7299   | -1.102 |
| 92364_at   | 86.1   | 76.4   | 158.2  | 120.7  | 138    | 71.1   | 137.5  | 139.3  | 0.67253269  | 110.35   | 121.475  | 11.125  | 0.90841737  | 0.6831   | -1.106 |
| 92365_at   | 303.8  | 354.5  | 407.7  | 389.7  | 354.6  | 506.3  | 406.5  | 365.3  | 0.332783068 | 363.925  | 408.175  | 44.25   | 0.891590617 | 0.3263   | 1.117  |
| 92366_at   | 2023.5 | 2439.8 | 2194.4 | 1884.7 | 2413.4 | 2002   | 2584   | 1758.8 | 0.818480223 | 2135.6   | 2189.55  | 53.95   | 0.975360234 | 0.8669   | -1.018 |
| 92367_at   | 193.4  | 231.8  | 240.5  | 206.3  | 184.9  | 166.5  | 188.8  | 144.1  | 0.020384158 | 218      | 171.075  | 46.925  | 1.2742949   | 0.02227  | -1.277 |
| 92368_at   | 66.2   | 27.7   | 103.8  | 36.2   | 88.9   | 77.9   | 97.3   | 91.3   | 0.175254087 | 58.475   | 88.85    | 30.375  | 0.658131683 | 0.1192   | 1.728  |
| 92369_at   | 65.7   | 84.2   | 88.8   | 110.8  | 90.3   | 94.7   | 104.1  | 101.4  | 0.358733423 | 87.375   | 97.625   | 10.25   | 0.895006402 | 0.3029   | 1.135  |
| 92370_at   | 150.1  | 40.1   | 100.8  | 41.7   | 71.6   | 45     | 47.3   | 72.5   | 0.436742902 | 83.175   | 59.1     | 24.075  | 1.407360406 | 0.5789   | -1.23  |
| 92371_at   | 177.1  | 111.6  | 113.6  | 139.8  | 180.8  | 189.6  | 125.2  | 164    | 0.209626451 | 135.525  | 164.9    | 29.375  | 0.821861734 | 0.206    | 1.224  |
| 92372_at   | 63.7   | 117.3  | 111    | 76.8   | 90.3   | 176.6  | 124.7  | 137.5  | 0.123835233 | 92.2     | 132.275  | 40.075  | 0.697032697 | 0.1216   | 1.439  |
| 92374_at   | 228.8  | 342.1  | 350.5  | 410    | 154.3  | 137.4  | 150.4  | 132.9  | 0.014502144 | 332.85   | 143.75   | 189.1   | 2.315478261 | 0.000722 | -2.27  |
| 92375_at   | 777.4  | 616    | 647.7  | 667.1  | 645.9  | 746.7  | 755.5  | 736.3  | 0.351742527 | 677.05   | 721.1    | 44.05   | 0.938912772 | 0.3354   | -1.067 |
| 92376_at   | 612.1  | 518.1  | 541.3  | 571.8  | 610.2  | 548.7  | 538.6  | 755    | 0.38682667  | 560.825  | 613.125  | 52.3    | 0.914699286 | 0.3757   | -1.085 |
| 92377_at   | 38.5   | 45.5   | 64.5   | 60.1   | 74.4   | 38.1   | 39.1   | 62.4   | 0.905372963 | 52.15    | 53.5     | 1.35    | 0.974766355 | 0.9833   | -1.005 |
| 92378_at   | 6.9    | 8.5    | 4.8    | 5.8    | 8      | 7.2    | 11.1   | 11     | 0.072519485 | 6.5      | 9.325    | 2.825   | 0.697050938 | 0.0684   | 1.443  |
| 92379_f_at | 2.3    | 1.5    | 3.8    | 2.6    | 2.9    | 2.3    | 3.5    | 3.6    | 0.394174485 | 2.55     | 3.075    | 0.525   | 0.829268293 | 0.3336   | 1.248  |
| 92380_r_at | 5      | 1      | 1.5    | 5.1    | 8.3    | 1.1    | 2.6    | 3.3    | 0.737236881 | 3.15     | 3.825    | 0.675   | 0.823529412 | 0.8102   | 1.16   |
| 92381_at   | 187.1  | 222.3  | 283.5  | 298.5  | 180.5  | 233.5  | 245.4  | 217    | 0.380719585 | 247.85   | 219.1    | 28.75   | 1.131218622 | 0.4134   | -1.119 |
| 92382_at   | 208.5  | 199.6  | 243.2  | 220.1  | 178.1  | 226.7  | 186.2  | 247.9  | 0.688751513 | 217.85   | 209.725  | 8.125   | 1.038741209 | 0.6356   | -1.046 |
| 92383_at   | 121.2  | 150.4  | 90.4   | 156.7  | 104    | 124.2  | 104.4  | 161.1  | 0.768475795 | 129.675  | 123.425  | 6.25    | 1.050638039 | 0.7992   | -1.044 |
| 92384_at   | 369.1  | 241.4  | 238    | 256.3  | 152.3  | 305.2  | 201.6  | 201.5  | 0.222287616 | 276.2    | 215.15   | 61.05   | 1.283755519 | 0.1856   | -1.302 |
| 92385_at   | 26.1   | 44.6   | 42.1   | 64.9   | 96.7   | 97.3   | 81.7   | 60     | 0.015852034 | 44.425   | 83.925   | 39.5    | 0.529341674 | 0.02225  | 1.951  |
| 92386_at   | 201.6  | 265.7  | 194.5  | 245.8  | 224.6  | 198.2  | 234    | 177.9  | 0.43007863  | 226.9    | 208.675  | 18.225  | 1.087336768 | 0.4408   | -1.084 |
| 92387_at   | 233.9  | 235    | 250.8  | 284.9  | 352.5  | 271.7  | 343.4  | 322.5  | 0.020334587 | 251.15   | 322.525  | 71.375  | 0.778699326 | 0.0156   | 1.282  |
| 92388_at   | 1041.2 | 1143.5 | 1188.7 | 1089.9 | 1081.5 | 1174.5 | 1129.5 | 1156.8 | 0.624322303 | 1115.825 | 1135.575 | 19.75   | 0.98260793  | 0.61     | -1.018 |
| 92389_at   | 40.8   | 56.1   | 77.2   | 108.2  | 111.8  | 107.6  | 130.3  | 106.8  | 0.05158425  | 70.575   | 114.125  | 43.55   | 0.618400876 | 0.04486  | 1.72   |
| 92390_at   | 47.3   | 166.7  | 161.9  | 61     | 154.6  | 93.9   | 125    | 28.5   | 0.841844491 | 109.225  | 100.5    | 8.725   | 1.08681592  | 0.8446   | -1.108 |
| 92391_at   | 380.4  | 282.3  | 425    | 428    | 340.9  | 422.7  | 338.1  | 415.6  | 0.992587148 | 378.925  | 379.325  | 0.4     | 0.998945495 | 0.9405   | -1.009 |
| 92392_at   | 2.7    | 12.3   | 18.1   | 8.9    | 7.2    | 18.5   | 7.6    | 19.3   | 0.587754645 | 10.5     | 13.15    | 2.65    | 0.798479087 | 0.5317   | 1.389  |
| 92393_at   | 28.7   | 48.2   | 38.9   | 36.2   | 62.4   | 31.1   | 61.2   | 64.1   | 0.12499658  | 38       | 54.7     | 16.7    | 0.694698355 | 0.1474   | 1.406  |
| 92394_f_at | 129.6  | 205.6  | 179.5  | 243.1  | 237    | 185.1  | 255.9  | 219    | 0.27138092  | 189.45   | 224.25   | 34.8    | 0.844816054 | 0.2597   | 1.206  |
| 92395_r_at | 256.8  | 348.4  | 317.4  | 318.1  | 351.7  | 315.2  | 425    | 377.7  | 0.106941923 | 310.175  | 367.4    | 57.225  | 0.844243332 | 0.1091   | 1.185  |
| 92396_at   | 16.8   | 6.3    | 8.1    | 3.3    | 6.3    | 7.3    | 3.6    | 17     | 0.986056381 | 8.625    | 8.55     | 0.075   | 1.00877193  | 1        | -1     |
| 92397_at   | 540.3  | 806    | 576.4  | 612.4  | 480.5  | 633.9  | 539.8  | 710    | 0.604016304 | 633.775  | 591.05   | 42.725  | 1.072286609 | 0.5967   | -1.071 |
| 92398_at   | 168.6  | 270.2  | 248.6  | 164.4  | 188.8  | 250    | 248.9  | 230.4  | 0.614914277 | 212.95   | 229.525  | 16.575  | 0.927785644 | 0.5416   | -1.098 |
| 92399_at   | 21.6   | 3.6    | 2.9    | 5.2    | 5.1    | 4      | 25.2   | 4.2    | 0.85573074  | 8.325    | 9.625    | 1.3     | 0.864935065 | 0.8108   | 1.171  |
| 92400_at   | 79.8   | 145.7  | 103    | 118.9  | 150    | 110.4  | 163.8  | 135.4  | 0.170863847 | 111.85   | 139.9    | 28.05   | 0.799499643 | 0.1712   | 1.268  |
| 92401_at   | 141.2  | 134.2  | 178.3  | 94.7   | 148    | 153.2  | 148.7  | 126.6  | 0.719618157 | 137.1    | 144.125  | 7.025   | 0.951257589 | 0.6191   | -1.075 |
| 92402_at   | 32.1   | 109.8  | 54.2   | 77.2   | 64.1   | 79.3   | 68.4   | 84.8   | 0.755356159 | 68.325   | 74.15    | 5.825   | 0.921443021 | 0.5452   | 1.189  |
| 92403_at   | 39.6   | 21.8   | 27.4   | 18.4   | 12.5   | 33.5   | 8.5    | 30.6   | 0.509264836 | 26.8     | 21.275   | 5.525   | 1.259694477 | 0.3889   | -1.418 |
| 92404_at   | 13.3   | 62     | 56.1   | 18.9   | 22.7   | 35.7   | 14.1   | 11.4   | 0.289258124 | 37.575   | 20.975   | 16.6    | 1.791418355 | 0.3438   | -1.609 |
| 92405_at   | 139.9  | 97.1   | 108.1  | 150.3  | 104.3  | 101    | 103.8  | 91.8   | 0.157511882 | 123.85   | 100.225  | 23.625  | 1.235719631 | 0.1176   | -1.218 |
| 92406_at   | 111.8  | 99.7   | 106.1  | 100.2  | 131    | 62.9   | 92.3   | 102.7  | 0.646793079 | 104.45   | 97.225   | 7.225   | 1.074312163 | 0.5266   | -1.11  |
| 92407_at   | 40.5   | 50.5   | 48.3   | 46.7   | 9.4    | 52     | 13     | 18.3   | 0.094526726 | 46.5     | 23.175   | 23.325  | 2.006472492 | 0.04884  | -2.513 |
| 92408_at   | 146.5  | 133.3  | 156.3  | 187.2  | 172.4  | 139.5  | 157.5  | 111    | 0.562743704 | 155.825  | 145.1    | 10.725  | 1.073914542 | 0.5424   | -1.08  |
| 92409_at   | 434.4  | 269.6  | 288.7  | 350    | 231.6  | 358.8  | 307.7  | 332.8  | 0.568772073 | 335.675  | 307.725  | 27.95   | 1.09082785  | 0.5863   | -1.086 |
| 92410_at   | 299.4  | 377.1  | 235.5  | 319.4  | 290.5  | 259.3  | 290.7  | 322.2  | 0.61811325  | 307.85   | 290.675  | 17.175  | 1.059086609 | 0.681    | -1.047 |



|            |        |        |        |        |        |        |        |        |             |          |         |        |             |          |        |
|------------|--------|--------|--------|--------|--------|--------|--------|--------|-------------|----------|---------|--------|-------------|----------|--------|
| 92411_at   | 431    | 404.5  | 453.8  | 472.1  | 463.4  | 389.7  | 427.8  | 586.6  | 0.590369919 | 440.35   | 466.875 | 26.525 | 0.943186078 | 0.6247   | -1.049 |
| 92412_s_at | 221    | 190.5  | 187    | 176.8  | 86.5   | 146.4  | 91     | 93.6   | 0.002821133 | 193.825  | 104.375 | 89.45  | 1.857005988 | 0.002746 | -1.896 |
| 92413_at   | 25.1   | 69.4   | 29.8   | 10     | 39.5   | 31.3   | 60.7   | 58.1   | 0.387781472 | 33.575   | 47.4    | 13.825 | 0.708333333 | 0.2598   | 1.699  |
| 92414_at   | 232.7  | 250.2  | 238.8  | 271.9  | 257.4  | 251.9  | 299    | 324.3  | 0.139756367 | 248.4    | 283.15  | 34.75  | 0.87727353  | 0.1176   | 1.136  |
| 92415_at   | 16.7   | 19.7   | 82.5   | 19.3   | 53.6   | 18.1   | 20.2   | 17.8   | 0.713188135 | 34.55    | 27.425  | 7.125  | 1.259799453 | 0.8314   | -1.108 |
| 92416_at   | 12.2   | 14.1   | 73.4   | 15.1   | 51.5   | 62.4   | 19.4   | 21.1   | 0.612267753 | 28.7     | 38.6    | 9.9    | 0.743523316 | 0.3849   | 1.624  |
| 92417_at   | 110.7  | 142.4  | 157.8  | 151.4  | 185.1  | 222.7  | 235.9  | 175.3  | 0.013746396 | 140.575  | 204.75  | 64.175 | 0.686568987 | 0.01232  | 1.458  |
| 92418_at   | 119.9  | 126.8  | 145.9  | 144.7  | 141    | 135.7  | 147.7  | 171.2  | 0.203511535 | 134.325  | 148.9   | 14.575 | 0.902115514 | 0.1966   | 1.108  |
| 92419_at   | 67.2   | 85.8   | 88.8   | 78.8   | 195.3  | 82.9   | 79.5   | 96.8   | 0.311795166 | 80.15    | 113.625 | 33.475 | 0.705390539 | 0.2442   | 1.325  |
| 92420_at   | 17.1   | 9.3    | 25.2   | 9      | 42.8   | 6.8    | 35     | 13     | 0.380426434 | 15.15    | 24.4    | 9.25   | 0.620901639 | 0.5361   | 1.385  |
| 92421_at   | 112.9  | 112.7  | 119.6  | 143.1  | 128.1  | 141.6  | 124.5  | 170    | 0.188143389 | 122.075  | 141.05  | 18.975 | 0.865473236 | 0.1679   | 1.152  |
| 92422_at   | 117.4  | 165.2  | 132    | 209.9  | 158.1  | 145.3  | 172    | 146    | 0.973132073 | 156.125  | 155.35  | 0.775  | 1.004988735 | 0.8987   | -1.018 |
| 92423_at   | 207.3  | 205.5  | 236.9  | 237.5  | 230.3  | 163.4  | 242.1  | 203.6  | 0.571581451 | 221.8    | 209.85  | 11.95  | 1.056945437 | 0.5316   | -1.066 |
| 92424_at   | 76.6   | 165.7  | 168    | 132.9  | 191.3  | 213.6  | 228.4  | 226.2  | 0.026813736 | 135.8    | 214.875 | 79.075 | 0.631995346 | 0.03717  | 1.652  |
| 92425_at   | 184.3  | 83.3   | 94.9   | 187.2  | 18.3   | 27.3   | 30.5   | 29.2   | 0.027984866 | 137.425  | 26.325  | 111.1  | 5.220322887 | 0.000599 | -4.971 |
| 92426_at   | 243.8  | 222.4  | 175.4  | 208.1  | 222.6  | 283.3  | 170.8  | 222.7  | 0.665872146 | 212.425  | 224.85  | 12.425 | 0.944740938 | 0.7139   | -1.049 |
| 92427_at   | 60.6   | 61.2   | 98.5   | 132.6  | 55     | 124.6  | 59.9   | 59.6   | 0.595024357 | 88.225   | 74.775  | 13.45  | 1.179872952 | 0.5525   | -1.186 |
| 92428_at   | 1435.7 | 1497.4 | 1596.9 | 1358.7 | 1887.3 | 1415.6 | 1493.2 | 1484.1 | 0.452174727 | 1472.175 | 1570.05 | 97.875 | 0.937661221 | 0.4459   | -1.061 |
| 92429_at   | 119.4  | 109.5  | 83.6   | 72.1   | 69.8   | 82.4   | 78.8   | 91.1   | 0.259116737 | 96.15    | 80.525  | 15.625 | 1.194039118 | 0.2596   | -1.175 |
| 92430_at   | 326.4  | 329.7  | 337.9  | 327.7  | 428.2  | 323.2  | 308.3  | 336.2  | 0.542536064 | 330.425  | 348.975 | 18.55  | 0.94684433  | 0.5518   | -1.047 |
| 92432_at   | 68.8   | 190.5  | 211.9  | 184.3  | 135.3  | 151.1  | 196    | 118.2  | 0.722555525 | 163.875  | 150.15  | 13.725 | 1.091408591 | 0.9481   | -1.019 |
| 92433_at   | 22.4   | 21.2   | 36.1   | 13.5   | 14.2   | 13.8   | 18.7   | 52.4   | 0.893395903 | 23.3     | 24.775  | 1.475  | 0.940464178 | 0.9058   | -1.047 |
| 92434_at   | 329.6  | 311.1  | 336.5  | 296.5  | 260.1  | 301.1  | 273.2  | 210.9  | 0.048343512 | 318.425  | 261.325 | 57.1   | 1.218501865 | 0.04392  | -1.227 |
| 92435_at   | 40.5   | 39.9   | 51.5   | 37     | 71.6   | 28.6   | 61     | 30.1   | 0.650831704 | 42.225   | 47.825  | 5.6    | 0.88290643  | 0.8483   | -1.051 |
| 92436_at   | 27.5   | 30.6   | 17.6   | 31.9   | 17.3   | 28.3   | 16     | 17.1   | 0.147404909 | 26.9     | 19.675  | 7.225  | 1.367217281 | 0.1483   | -1.371 |
| 92437_at   | 110.2  | 109.1  | 145.9  | 63.6   | 129    | 72.8   | 116.3  | 129.2  | 0.837223527 | 107.2    | 111.825 | 4.625  | 0.958640733 | 0.7998   | -1.06  |
| 92439_at   | 116.6  | 102.4  | 160.5  | 164.6  | 203.7  | 96.7   | 219.4  | 159.7  | 0.335340253 | 136.025  | 169.875 | 33.85  | 0.800735835 | 0.4072   | 1.216  |
| 92440_at   | 58.4   | 80.6   | 77.5   | 57     | 76.5   | 76.3   | 43.4   | 89.8   | 0.799464418 | 68.375   | 71.5    | 3.125  | 0.956293706 | 0.9073   | -1.023 |
| 92441_at   | 97.2   | 70.7   | 88.7   | 90.9   | 92.1   | 103.1  | 121.9  | 83.2   | 0.24470272  | 86.875   | 100.075 | 13.2   | 0.868098926 | 0.2447   | 1.148  |
| 92442_at   | 111.1  | 183.8  | 188.9  | 86.8   | 82.2   | 154.4  | 150.9  | 171.1  | 0.929398208 | 142.65   | 139.65  | 3      | 1.021482277 | 0.9837   | -1.005 |
| 92443_i_at | 629.7  | 682    | 580.2  | 577.3  | 878    | 638.3  | 677.9  | 734.2  | 0.11438205  | 617.3    | 732.1   | 114.8  | 0.843190821 | 0.08297  | 1.18   |
| 92444_f_at | 986.3  | 942.8  | 907.3  | 950.1  | 970.7  | 1034.4 | 886.3  | 844.8  | 0.796299905 | 946.625  | 934.05  | 12.575 | 1.013462877 | 0.7521   | -1.016 |
| 92445_at   | 9      | 9.3    | 6.2    | 10.3   | 48.6   | 6.3    | 11.1   | 20.7   | 0.264025175 | 8.7      | 21.675  | 12.975 | 0.401384083 | 0.2011   | 1.912  |
| 92448_s_at | 77.6   | 124.3  | 131.8  | 161.8  | 122.2  | 136.6  | 155.9  | 147.3  | 0.428071109 | 123.875  | 140.5   | 16.625 | 0.881672598 | 0.3793   | 1.168  |
| 92449_at   | 25.5   | 33.1   | 42.6   | 51     | 22.1   | 64.1   | 44     | 42.4   | 0.638429246 | 38.05    | 43.15   | 5.1    | 0.881807648 | 0.7425   | -1.097 |
| 92450_at   | 260.3  | 389.7  | 324.8  | 306.5  | 325.6  | 416.5  | 407.3  | 486.1  | 0.083718353 | 320.325  | 408.875 | 88.55  | 0.783430144 | 0.08235  | 1.277  |
| 92451_at   | 163.3  | 113.2  | 149.6  | 139.8  | 137.4  | 98.2   | 167    | 175.5  | 0.887196219 | 141.475  | 144.525 | 3.05   | 0.978896385 | 0.9712   | -1.006 |
| 92452_at   | 453.2  | 473.4  | 384.8  | 463    | 245.8  | 389.4  | 341.9  | 419.5  | 0.084457534 | 443.6    | 349.15  | 94.45  | 1.270514106 | 0.09096  | -1.292 |
| 92453_at   | 0.8    | 3.4    | 0.7    | 4.4    | 6.5    | 0.9    | 1      | 0.8    | 0.988695544 | 2.325    | 2.3     | 0.025  | 1.010869565 | 0.8394   | -1.158 |
| 92454_at   | 73.6   | 136.7  | 137.2  | 159.3  | 66.5   | 122.2  | 155.3  | 120.3  | 0.697542778 | 126.7    | 116.075 | 10.625 | 1.091535645 | 0.7217   | -1.097 |
| 92455_at   | 25.8   | 9.3    | 34.6   | 13.5   | 39.1   | 12.4   | 15.5   | 15.6   | 0.986451982 | 20.8     | 20.65   | 0.15   | 1.007263923 | 0.9734   | -1.014 |
| 92456_at   | 159.1  | 315    | 232.6  | 265.2  | 418.2  | 284    | 316.2  | 331.3  | 0.073626527 | 242.975  | 337.425 | 94.45  | 0.720085945 | 0.08149  | 1.416  |
| 92457_at   | 15.2   | 8.2    | 10.7   | 14     | 15.5   | 12     | 5.6    | 5.9    | 0.466254861 | 12.025   | 9.75    | 2.275  | 1.233333333 | 0.3767   | -1.322 |
| 92458_at   | 110.2  | 133.6  | 164.7  | 165.8  | 121.1  | 105.6  | 108    | 101.5  | 0.077048475 | 143.575  | 109.05  | 34.525 | 1.316597891 | 0.04541  | -1.301 |
| 92459_at   | 13.5   | 13.7   | 22.8   | 41.5   | 23.1   | 50.7   | 17.7   | 22.3   | 0.597103649 | 22.875   | 28.45   | 5.575  | 0.804042179 | 0.5145   | 1.275  |
| 92460_at   | 248.8  | 280    | 293.5  | 258.4  | 276.1  | 243    | 338.8  | 252.8  | 0.767446057 | 270.175  | 277.675 | 7.5    | 0.972990006 | 0.8096   | -1.021 |
| 92461_at   | 57.1   | 79.7   | 101.6  | 87.1   | 82.9   | 62.1   | 94.7   | 93     | 0.885215042 | 81.375   | 83.175  | 1.8    | 0.978358882 | 0.8559   | -1.03  |
| 92462_at   | 127    | 105.3  | 144    | 132    | 95.1   | 97.3   | 92.4   | 48.3   | 0.025259295 | 127.075  | 83.275  | 43.8   | 1.525968178 | 0.04656  | -1.575 |
| 92464_at   | 339.9  | 363.7  | 246.2  | 321.4  | 335.5  | 319.7  | 212.8  | 402.1  | 0.995524365 | 317.8    | 317.525 | 0.275  | 1.000866074 | 0.9234   | -1.016 |
| 92465_at   | 22.8   | 43.6   | 32.7   | 22.6   | 52.2   | 32.3   | 19.6   | 39.3   | 0.546038551 | 30.425   | 35.85   | 5.425  | 0.848675035 | 0.6057   | 1.152  |
| 92466_at   | 1150.5 | 986.5  | 1141.4 | 1446.8 | 1016.3 | 1084.1 | 1317.6 | 1657   | 0.635111798 | 1181.3   | 1268.75 | 87.45  | 0.931073892 | 0.6616   | -1.064 |
| 92467_g_at | 36.2   | 82.5   | 48.2   | 48.4   | 21.4   | 65     | 17.2   | 23.1   | 0.190363556 | 53.825   | 31.675  | 22.15  | 1.699289661 | 0.1142   | -1.882 |
| 92468_at   | 328.7  | 238.7  | 274    | 387    | 225.8  | 276.3  | 273.2  | 245.8  | 0.211861386 | 307.1    | 255.275 | 51.825 | 1.203016355 | 0.1884   | -1.187 |
| 92469_at   | 330.2  | 276.6  | 419.6  | 347.6  | 399.4  | 447.7  | 517.8  | 315.6  | 0.194915072 | 343.5    | 420.125 | 76.625 | 0.817613805 | 0.1964   | 1.217  |
| 92470_f_at | 137.7  | 77.9   | 66.5   | 101.9  | 145.2  | 95.1   | 186    | 112.7  | 0.181206461 | 96       | 134.75  | 38.75  | 0.712430427 | 0.1623   | 1.413  |
| 92471_i_at | 25.9   | 21.7   | 27.2   | 78.6   | 111.4  | 41.4   | 79.6   | 36.7   | 0.24222014  | 38.35    | 67.275  | 28.925 | 0.570048309 | 0.1762   | 1.83   |



|            |        |        |        |        |        |        |        |        |             |          |          |         |             |         |        |
|------------|--------|--------|--------|--------|--------|--------|--------|--------|-------------|----------|----------|---------|-------------|---------|--------|
| 92472_f_at | 36.9   | 37.3   | 46.4   | 51.3   | 61     | 38.2   | 58.3   | 48.8   | 0.224954812 | 42.975   | 51.575   | 8.6     | 0.833252545 | 0.2347  | 1.193  |
| 92473_at   | 164.6  | 199.6  | 164.8  | 181.8  | 209.9  | 263.3  | 203.3  | 241.9  | 0.025439118 | 177.7    | 229.6    | 51.9    | 0.773954704 | 0.01588 | 1.289  |
| 92474_at   | 227.7  | 230    | 113.3  | 219.1  | 92     | 173.9  | 126.3  | 128.5  | 0.096467185 | 197.525  | 130.175  | 67.35   | 1.517380449 | 0.1117  | -1.496 |
| 92475_g_at | 66.3   | 65.7   | 91.1   | 100.4  | 48.9   | 84.6   | 60.8   | 111.4  | 0.796573907 | 80.875   | 76.425   | 4.45    | 1.05822702  | 0.6919  | -1.092 |
| 92476_at   | 45.5   | 19.7   | 33.3   | 34.7   | 29.3   | 34.4   | 31.3   | 34.6   | 0.878136153 | 33.3     | 32.4     | 0.9     | 1.027777778 | 0.9448  | -1.013 |
| 92477_at   | 890.6  | 961    | 892    | 1432.8 | 592.9  | 924.9  | 632.9  | 928.8  | 0.141629497 | 1044.1   | 769.875  | 274.225 | 1.356194187 | 0.1146  | -1.357 |
| 92478_at   | 582    | 429.4  | 422.9  | 498    | 284.8  | 398.4  | 350.8  | 382.5  | 0.032586562 | 483.075  | 354.125  | 128.95  | 1.364136957 | 0.0262  | -1.363 |
| 92480_f_at | 341.7  | 299.9  | 291.1  | 401.9  | 349.4  | 342.4  | 345.6  | 317    | 0.861255878 | 333.65   | 338.6    | 4.95    | 0.985380981 | 0.7818  | -1.023 |
| 92481_at   | 373.6  | 400.8  | 430.7  | 350.2  | 354.6  | 404.4  | 371.4  | 430.3  | 0.957396218 | 388.825  | 390.175  | 1.35    | 0.996540014 | 0.9558  | -1.004 |
| 92482_at   | 36.5   | 19.2   | 28.1   | 55.8   | 53     | 64.1   | 41.5   | 13.1   | 0.575011734 | 34.9     | 42.925   | 8.025   | 0.81304601  | 0.7699  | 1.137  |
| 92483_g_at | 15.9   | 54.6   | 19.9   | 15.7   | 19.5   | 23.3   | 31.7   | 9.9    | 0.62877354  | 26.525   | 21.1     | 5.425   | 1.257109005 | 0.6921  | -1.173 |
| 92484_at   | 103.9  | 103    | 69.5   | 128    | 138.4  | 139.8  | 148.1  | 113.2  | 0.062670717 | 101.1    | 134.875  | 33.775  | 0.749582947 | 0.07148 | 1.359  |
| 92485_at   | 13.6   | 22.9   | 21.2   | 28.3   | 8.2    | 51.1   | 7.6    | 30.1   | 0.813276976 | 21.5     | 24.25    | 2.75    | 0.886597938 | 0.7533  | -1.178 |
| 92486_at   | 91.2   | 127    | 118.4  | 80.4   | 81     | 150.5  | 126    | 171.6  | 0.268457847 | 104.25   | 132.275  | 28.025  | 0.788130788 | 0.3089  | 1.244  |
| 92487_at   | 169.5  | 194.4  | 107.1  | 121.7  | 112.8  | 130.1  | 158.6  | 237.7  | 0.747385402 | 148.175  | 159.8    | 11.625  | 0.927252816 | 0.7764  | -1.065 |
| 92488_at   | 44.4   | 41.8   | 32.7   | 70.2   | 39.8   | 67.9   | 56.6   | 42.3   | 0.688625044 | 47.275   | 51.65    | 4.375   | 0.915295257 | 0.6252  | -1.11  |
| 92489_at   | 61.6   | 61.4   | 67.8   | 52.7   | 66.6   | 66.7   | 75.3   | 62.2   | 0.151196559 | 60.875   | 67.7     | 6.825   | 0.899187592 | 0.1507  | -1.114 |
| 92490_at   | 11.6   | 10     | 68.2   | 13.9   | 10.3   | 9.2    | 34.8   | 10     | 0.557020653 | 25.925   | 16.075   | 9.85    | 1.612752722 | 0.601   | -1.352 |
| 92492_at   | 288.8  | 263.2  | 284.2  | 299.3  | 182.2  | 300.6  | 153    | 249    | 0.154492999 | 283.875  | 221.2    | 62.675  | 1.283340868 | 0.1166  | -1.327 |
| 92493_at   | 65.1   | 53.4   | 90.8   | 90.9   | 72.8   | 69.9   | 77.1   | 67.7   | 0.761961892 | 75.05    | 71.875   | 3.175   | 1.044173913 | 0.8904  | -1.02  |
| 92494_at   | 3.2    | 2.5    | 3.9    | 7.7    | 4.4    | 2.1    | 4.5    | 3.7    | 0.638137668 | 4.325    | 3.675    | 0.65    | 1.176870748 | 0.7376  | -1.111 |
| 92495_at   | 387.3  | 351.8  | 454.8  | 463.8  | 369.9  | 409    | 399.7  | 442.7  | 0.780631158 | 414.425  | 405.325  | 9.1     | 1.022451119 | 0.8221  | -1.018 |
| 92496_at   | 307.3  | 292.6  | 288    | 218.5  | 439.5  | 256.5  | 288.6  | 277.9  | 0.443619483 | 276.6    | 315.625  | 39.025  | 0.876356436 | 0.4444  | 1.124  |
| 92497_at   | 7.2    | 9      | 11.4   | 5.3    | 7.7    | 9.8    | 8.2    | 16.8   | 0.376847556 | 8.225    | 10.625   | 2.4     | 0.774117647 | 0.3531  | 1.275  |
| 92498_at   | 923.7  | 1257.4 | 1047.5 | 1386.9 | 572.4  | 817.1  | 761.6  | 822.5  | 0.020029768 | 1153.875 | 743.4    | 410.475 | 1.552158999 | 0.01276 | -1.549 |
| 92499_at   | 27.6   | 19     | 7.9    | 3.4    | 41.6   | 31.3   | 26     | 7.6    | 0.227771911 | 14.475   | 26.625   | 12.15   | 0.543661972 | 0.272   | 2.063  |
| 92500_at   | 259.8  | 275.2  | 149    | 266.5  | 193.3  | 238    | 213.4  | 289.1  | 0.912378909 | 237.625  | 233.45   | 4.175   | 1.017883915 | 1       | -1     |
| 92501_s_at | 985    | 733.5  | 886.4  | 854.3  | 575    | 1336.2 | 737.7  | 804.2  | 0.993426735 | 864.8    | 863.275  | 1.525   | 1.001766529 | 0.8155  | -1.047 |
| 92502_at   | 3473.4 | 2320.4 | 2760.7 | 2706.6 | 1826.4 | 3023.6 | 2475.4 | 2450.4 | 0.320494005 | 2815.275 | 2443.95  | 371.325 | 1.151936414 | 0.3124  | -1.158 |
| 92503_at   | 195.4  | 175.3  | 176.4  | 232.8  | 225.5  | 166.3  | 172.9  | 153.7  | 0.487222353 | 194.975  | 179.6    | 15.375  | 1.085606904 | 0.4476  | -1.09  |
| 92504_at   | 23.5   | 11.9   | 14     | 482.9  | 33.7   | 86     | 13.8   | 23.2   | 0.481490719 | 133.075  | 39.175   | 93.9    | 3.396936822 | 0.8569  | -1.196 |
| 92505_g_at | 25.9   | 25.6   | 35.8   | 84.1   | 11     | 31.6   | 25.7   | 52.2   | 0.472005615 | 42.85    | 30.125   | 12.725  | 1.422406639 | 0.4288  | -1.438 |
| 92506_at   | 68.4   | 45.3   | 56.3   | 63.8   | 43     | 85.3   | 94.2   | 32.6   | 0.758472318 | 58.45    | 63.775   | 5.325   | 0.916503332 | 0.9894  | -1.004 |
| 92507_at   | 151.4  | 203.7  | 192.6  | 294.7  | 145.8  | 206.3  | 213    | 204.6  | 0.618462217 | 210.6    | 192.425  | 18.175  | 1.094452384 | 0.6758  | -1.075 |
| 92508_s_at | 120.8  | 193.4  | 177.1  | 217.7  | 115.8  | 180.7  | 131.3  | 131.2  | 0.18998638  | 177.25   | 139.75   | 37.5    | 1.268336315 | 0.1996  | -1.258 |
| 92509_at   | 15.4   | 12.7   | 12.8   | 19.8   | 12.1   | 15.4   | 14.1   | 15.2   | 0.620695314 | 15.175   | 14.2     | 0.975   | 1.068661972 | 0.6689  | -1.055 |
| 92510_at   | 7.6    | 11.8   | 11.2   | 9.1    | 12.1   | 13.8   | 8.3    | 9.7    | 0.527613288 | 9.925    | 10.975   | 1.05    | 0.904328018 | 0.5341  | 1.105  |
| 92511_at   | 18.5   | 13.8   | 14.9   | 9.2    | 11.3   | 10.7   | 15.5   | 8.8    | 0.333192906 | 14.1     | 11.575   | 2.525   | 1.218142549 | 0.358   | -1.205 |
| 92512_g_at | 150    | 122.5  | 213.2  | 167.7  | 248.9  | 44.8   | 191.4  | 45.5   | 0.609562968 | 163.35   | 132.65   | 30.7    | 1.23143611  | 0.3505  | -1.613 |
| 92513_at   | 1770.2 | 1367.4 | 1565.1 | 1390.5 | 1151.5 | 1391.4 | 1229.2 | 1293.2 | 0.064301342 | 1523.3   | 1266.325 | 256.975 | 1.202929738 | 0.04527 | -1.199 |
| 92514_at   | 21.4   | 15     | 10.7   | 19.8   | 48.5   | 17.3   | 10.2   | 34     | 0.303309808 | 16.725   | 27.5     | 10.775  | 0.608181818 | 0.3792  | 1.437  |
| 92515_at   | 18.6   | 6.8    | 9.3    | 7.3    | 15.4   | 11.3   | 6.5    | 24.9   | 0.435524396 | 10.5     | 14.525   | 4.025   | 0.722891566 | 0.4463  | 1.345  |
| 92516_at   | 54.3   | 148.5  | 107.4  | 167.6  | 117.4  | 161.1  | 18.1   | 40.3   | 0.432986851 | 119.45   | 84.225   | 35.225  | 1.418224993 | 0.3351  | -1.801 |
| 92517_at   | 575.1  | 573.8  | 615.5  | 549.9  | 487.6  | 556.2  | 525.8  | 470.4  | 0.030612506 | 578.575  | 510      | 68.575  | 1.134460784 | 0.02793 | -1.136 |
| 92518_at   | 607.6  | 605.2  | 661.3  | 669    | 421.6  | 592.9  | 534.1  | 466.8  | 0.031068868 | 635.775  | 503.85   | 131.925 | 1.261833879 | 0.02349 | -1.271 |
| 92519_at   | 123.8  | 134.8  | 173.2  | 171.4  | 127.8  | 197.4  | 163    | 226.3  | 0.313606199 | 150.8    | 178.625  | 27.825  | 0.844226732 | 0.3355  | 1.17   |
| 92520_at   | 38.8   | 34     | 39.7   | 31.4   | 76.2   | 50.8   | 15.2   | 72.3   | 0.296613012 | 35.975   | 53.625   | 17.65   | 0.670862471 | 0.5557  | 1.268  |
| 92521_at   | 127.6  | 191.5  | 158.6  | 183.5  | 170.4  | 161.7  | 200    | 173.9  | 0.530673593 | 165.3    | 176.5    | 11.2    | 0.936543909 | 0.4932  | -1.077 |
| 92522_at   | 160.2  | 127.3  | 164.9  | 167.4  | 145.8  | 132.3  | 134.8  | 138.6  | 0.16418904  | 154.95   | 137.875  | 17.075  | 1.123844062 | 0.1497  | -1.118 |
| 92523_at   | 28.8   | 31.7   | 52.8   | 48     | 33.8   | 63.2   | 13.1   | 43.1   | 0.872635157 | 40.325   | 38.3     | 2.025   | 1.052872063 | 0.6726  | -1.177 |
| 92524_at   | 9      | 14.5   | 8.5    | 23     | 9.5    | 2.2    | 6.3    | 6.1    | 0.101870296 | 13.75    | 6.025    | 7.725   | 2.282157676 | 0.06873 | -2.385 |
| 92525_i_at | 200.3  | 269    | 203.6  | 259.6  | 277    | 216.9  | 271.6  | 180    | 0.915841179 | 233.125  | 236.375  | 3.25    | 0.986250661 | 0.9536  | -1.008 |
| 92526_f_at | 196.1  | 273.5  | 186.9  | 207.9  | 225.7  | 189.3  | 243.2  | 191.4  | 0.881531665 | 216.1    | 212.4    | 3.7     | 1.017419962 | 0.9147  | -1.012 |
| 92527_at   | 165.1  | 269.6  | 233.7  | 194.2  | 230.4  | 194.6  | 223    | 236.6  | 0.834384324 | 215.65   | 221.15   | 5.5     | 0.975130002 | 0.7447  | -1.04  |
| 92528_at   | 25.5   | 64.3   | 73.3   | 75     | 53.4   | 106.3  | 103.6  | 61.1   | 0.278912176 | 59.525   | 81.1     | 21.575  | 0.733970407 | 0.3117  | 1.413  |
| 92529_s_at | 226    | 240.7  | 210.4  | 266.2  | 207    | 249.9  | 226.8  | 268.1  | 0.909173853 | 235.825  | 237.95   | 2.125   | 0.991069552 | 0.9195  | -1.008 |



|            |         |         |        |         |         |        |        |         |             |           |          |          |             |         |        |
|------------|---------|---------|--------|---------|---------|--------|--------|---------|-------------|-----------|----------|----------|-------------|---------|--------|
| 92531_at   | 289.9   | 139.2   | 256.3  | 240.5   | 204.2   | 146.2  | 168.3  | 210     | 0.236533727 | 231.475   | 182.175  | 49.3     | 1.27061891  | 0.2864  | -1.239 |
| 92532_at   | 34      | 46.6    | 36.1   | 58.9    | 46.1    | 37.8   | 38.5   | 35.3    | 0.508438083 | 43.9      | 39.425   | 4.475    | 1.113506658 | 0.5523  | -1.091 |
| 92533_at   | 24.2    | 13.4    | 40.8   | 50.5    | 7.7     | 34.6   | 37     | 16.1    | 0.473535295 | 32.225    | 23.85    | 8.375    | 1.35115304  | 0.4768  | -1.433 |
| 92534_at   | 514     | 331.9   | 436.5  | 396     | 220.7   | 426.6  | 289.9  | 372.3   | 0.171873122 | 419.6     | 327.375  | 92.225   | 1.281710577 | 0.1719  | -1.305 |
| 92535_at   | 361.1   | 273.7   | 321    | 311.8   | 276.9   | 358.2  | 245.7  | 344.4   | 0.755753116 | 316.9     | 306.3    | 10.6     | 1.034606595 | 0.7117  | -1.042 |
| 92536_at   | 64.2    | 29.3    | 47.9   | 26.7    | 31.6    | 48.8   | 74.4   | 48.6    | 0.504739774 | 42.025    | 50.85    | 8.825    | 0.826450344 | 0.4703  | 1.232  |
| 92537_g_at | 69.7    | 21.5    | 38     | 75.5    | 40.6    | 93     | 90.5   | 36.1    | 0.516853005 | 51.175    | 65.05    | 13.875   | 0.786702537 | 0.5209  | 1.303  |
| 92538_at   | 25.1    | 103.4   | 42.3   | 111.8   | 35.6    | 25.3   | 86.2   | 87.6    | 0.676375188 | 70.65     | 58.675   | 11.975   | 1.204090328 | 0.7677  | -1.159 |
| 92539_at   | 9964.7  | 9550.6  | 9643.2 | 9292.9  | 12766.9 | 7697.7 | 9498.2 | 8359.6  | 0.979045431 | 9612.85   | 9580.6   | 32.25    | 1.003366177 | 0.8489  | -1.022 |
| 92540_f_at | 570.7   | 848.6   | 649    | 517.4   | 707.2   | 694.5  | 635    | 574.6   | 0.939098912 | 646.425   | 652.825  | 6.4      | 0.990196454 | 0.8431  | -1.025 |
| 92541_at   | 112.3   | 65.9    | 92.4   | 72.4    | 102.5   | 90.7   | 87.8   | 98.5    | 0.4590918   | 85.75     | 94.875   | 9.125    | 0.903820817 | 0.3724  | 1.129  |
| 92542_at   | 1194.9  | 2063.3  | 1664   | 2278.4  | 2251    | 2265.2 | 2162.8 | 2500.7  | 0.127118468 | 1800.15   | 2294.925 | 494.775  | 0.784404719 | 0.1137  | 1.311  |
| 92543_at   | 191.2   | 277.7   | 265.9  | 194.4   | 349.9   | 205.6  | 330.4  | 272.6   | 0.204670781 | 232.3     | 289.625  | 57.325   | 0.802071644 | 0.2173  | 1.24   |
| 92544_f_at | 7478.6  | 6138.5  | 7009.4 | 5783.8  | 6841.6  | 6131.8 | 6659.3 | 6307.4  | 0.794166685 | 6602.575  | 6485.025 | 117.55   | 1.018126376 | 0.8379  | -1.014 |
| 92545_f_at | 1950.2  | 2120.8  | 2018.6 | 1651.1  | 3448.4  | 1366.5 | 1916.8 | 2602.7  | 0.445374508 | 1935.175  | 2333.6   | 398.425  | 0.829265941 | 0.5419  | 1.143  |
| 92546_r_at | 2154.7  | 2499.1  | 2594.4 | 1405.5  | 5030.3  | 1650.8 | 2453.6 | 2734.7  | 0.359993773 | 2163.425  | 2967.35  | 803.925  | 0.729076449 | 0.3715  | 1.298  |
| 92547_at   | 546.8   | 481.4   | 523.2  | 526     | 382.8   | 525.8  | 435.1  | 562.2   | 0.383178642 | 519.35    | 476.475  | 42.875   | 1.089983735 | 0.3338  | -1.101 |
| 92548_g_at | 389     | 390.7   | 448.8  | 636.7   | 512.2   | 406.4  | 686    | 674.7   | 0.290905143 | 466.3     | 569.825  | 103.525  | 0.818321414 | 0.286   | 1.22   |
| 92549_at   | 1748.1  | 1539.1  | 1702.1 | 1422.3  | 1592.7  | 1642   | 1557.6 | 1646.8  | 0.934611887 | 1602.9    | 1609.775 | 6.875    | 0.995729217 | 0.8864  | -1.007 |
| 92550_at   | 262.2   | 255.2   | 216.5  | 177.1   | 249.4   | 220.6  | 175.2  | 285.3   | 0.878223029 | 227.75    | 232.625  | 4.875    | 0.979043525 | 0.9039  | -1.017 |
| 92551_at   | 819.4   | 809.3   | 628.3  | 776     | 641.6   | 704.5  | 707.3  | 706.2   | 0.224622464 | 758.25    | 689.9    | 68.35    | 1.099072329 | 0.225   | -1.094 |
| 92553_at   | 4429.9  | 4250.9  | 4597.3 | 4140.5  | 4864.2  | 3949.3 | 4219.9 | 4063.1  | 0.740046976 | 4354.65   | 4274.125 | 80.525   | 1.018840113 | 0.6959  | -1.021 |
| 92554_at   | 514     | 887.8   | 673.2  | 695.4   | 663.4   | 679.1  | 576.1  | 658.6   | 0.582541625 | 692.6     | 644.3    | 48.3     | 1.074965078 | 0.653   | -1.057 |
| 92555_at   | 1163.8  | 784.4   | 844.7  | 903.1   | 581.7   | 909.8  | 830    | 825.1   | 0.258050697 | 924       | 786.65   | 137.35   | 1.174601157 | 0.2579  | -1.177 |
| 92556_at   | 27.8    | 36.5    | 40.6   | 56.9    | 37.2    | 76.7   | 38.7   | 70.4    | 0.260696013 | 40.45     | 55.75    | 15.3     | 0.725560538 | 0.2625  | 1.349  |
| 92557_at   | 3057.7  | 4273.5  | 3825.7 | 3073.5  | 4389.6  | 3406.7 | 3825.8 | 2907.1  | 0.868906368 | 3557.6    | 3632.3   | 74.7     | 0.979434518 | 0.875   | -1.02  |
| 92558_at   | 362.6   | 230.1   | 329.7  | 483.1   | 231.2   | 363.9  | 423.6  | 160.4   | 0.504510805 | 351.375   | 294.775  | 56.6     | 1.192010856 | 0.4625  | -1.235 |
| 92559_at   | 97.2    | 50      | 69.9   | 93.1    | 44.3    | 99.9   | 80.5   | 54      | 0.655124778 | 77.55     | 69.675   | 7.875    | 1.113024758 | 0.6245  | -1.132 |
| 92560_g_at | 177.7   | 152.1   | 199.3  | 166.5   | 132.6   | 146.9  | 144    | 129.2   | 0.029218004 | 173.9     | 138.175  | 35.725   | 1.258548942 | 0.0129  | -1.254 |
| 92561_at   | 245.5   | 228.2   | 189.1  | 194.9   | 126.7   | 255.7  | 142    | 124.2   | 0.19992918  | 214.425   | 162.15   | 52.275   | 1.322386679 | 0.1268  | -1.379 |
| 92562_at   | 1364.8  | 1108.1  | 1065.7 | 1128.6  | 1515.3  | 1060.1 | 1214.9 | 1004.4  | 0.82019268  | 1166.8    | 1198.675 | 31.875   | 0.973408138 | 0.8672  | -1.019 |
| 92563_at   | 234.5   | 225.4   | 296    | 166.7   | 318.3   | 240    | 278.9  | 236.7   | 0.295102802 | 230.65    | 268.475  | 37.825   | 0.859111649 | 0.2746  | 1.179  |
| 92564_at   | 101.4   | 98.4    | 87.3   | 137.3   | 57.9    | 75.4   | 79.9   | 51.7    | 0.025983444 | 106.1     | 66.225   | 39.875   | 1.602114005 | 0.01571 | -1.605 |
| 92565_at   | 1906.2  | 1253.3  | 1473.8 | 1646.3  | 1164.9  | 1393.2 | 1236.3 | 1696.2  | 0.319793651 | 1569.9    | 1372.65  | 197.25   | 1.143700142 | 0.3145  | -1.142 |
| 92566_at   | 30.9    | 46.8    | 30.4   | 73.4    | 25.2    | 32.7   | 10     | 64.8    | 0.457145454 | 45.375    | 33.175   | 12.2     | 1.367746797 | 0.3457  | -1.568 |
| 92567_at   | 4851.9  | 5466    | 4588.3 | 4729.9  | 5703.2  | 5940.9 | 5631.7 | 5163.1  | 0.033316427 | 4909.025  | 5609.725 | 700.7    | 0.875091916 | 0.03208 | 1.144  |
| 92568_at   | 505.3   | 391.7   | 374.2  | 531     | 244.4   | 435.4  | 305.4  | 356.7   | 0.088157416 | 450.55    | 335.475  | 115.075  | 1.343021089 | 0.08919 | -1.357 |
| 92569_f_at | 1132.3  | 772.8   | 891.4  | 1079.1  | 923.3   | 808.6  | 788.3  | 865.8   | 0.243477767 | 968.9     | 846.5    | 122.4    | 1.144595393 | 0.2353  | -1.134 |
| 92570_at   | 62.7    | 59.9    | 61.3   | 64.5    | 34.5    | 53.5   | 50.9   | 40.8    | 0.027332527 | 62.1      | 44.925   | 17.175   | 1.38230384  | 0.01653 | -1.403 |
| 92571_at   | 709.6   | 706.7   | 784.7  | 817.1   | 458.2   | 827.1  | 650    | 689.4   | 0.295004641 | 754.525   | 656.175  | 98.35    | 1.149883796 | 0.2617  | -1.173 |
| 92572_at   | 242     | 220.3   | 225.8  | 261.6   | 177.8   | 195.1  | 202.3  | 226.4   | 0.03569056  | 237.425   | 200.4    | 37.025   | 1.184755489 | 0.03521 | -1.187 |
| 92573_at   | 3218.4  | 3581.6  | 3727.4 | 3141.3  | 2620.3  | 3566.4 | 3208.3 | 3436    | 0.442778506 | 3417.175  | 3207.75  | 209.425  | 1.065287195 | 0.4317  | -1.07  |
| 92574_at   | 3676.1  | 2894.3  | 3142.1 | 2706.1  | 2770.3  | 3025.8 | 2706.3 | 2391.3  | 0.184047268 | 3104.65   | 2723.425 | 381.225  | 1.139979988 | 0.1696  | -1.136 |
| 92575_at   | 951.8   | 937.7   | 819.9  | 835.2   | 1058.7  | 939.6  | 850    | 1039.9  | 0.202161239 | 886.15    | 972.05   | 85.9     | 0.91163006  | 0.2038  | -1.095 |
| 92577_f_at | 18933.9 | 19288.9 | 18044  | 18009.1 | 28748.1 | 16180  | 20911  | 20756.9 | 0.323576052 | 18568.975 | 21649    | 3080.025 | 0.857728994 | 0.3071  | 1.142  |
| 92578_at   | 2586.1  | 2371.7  | 2409.7 | 2505.4  | 2159.5  | 2233.3 | 2075.8 | 2602.3  | 0.185838038 | 2468.225  | 2267.725 | 200.5    | 1.088414601 | 0.1492  | -1.092 |
| 92579_at   | 911.2   | 710.5   | 725.7  | 867.4   | 817.3   | 711.9  | 776.3  | 642     | 0.334234013 | 803.7     | 736.875  | 66.825   | 1.090687023 | 0.339   | -1.089 |
| 92580_at   | 690.3   | 625.5   | 578    | 501     | 644.8   | 622.6  | 586.2  | 505.9   | 0.866611104 | 598.7     | 589.875  | 8.825    | 1.014960797 | 0.8917  | -1.012 |
| 92581_at   | 2782.7  | 2250.4  | 2073.4 | 2602.8  | 2396.4  | 2981.9 | 2414.1 | 2396.3  | 0.601162173 | 2427.325  | 2547.175 | 119.85   | 0.952947874 | 0.5801  | -1.052 |
| 92582_at   | 195.4   | 248.7   | 233.9  | 258.2   | 246.5   | 247.8  | 254.8  | 202     | 0.845915112 | 234.05    | 237.775  | 3.725    | 0.984333929 | 0.8417  | -1.017 |
| 92583_at   | 4.8     | 31.9    | 30.6   | 9.3     | 30.1    | 12.4   | 10.6   | 55.8    | 0.549784299 | 19.15     | 27.225   | 8.075    | 0.703397612 | 0.5269  | 1.504  |
| 92584_at   | 388.6   | 412.7   | 407.5  | 343.9   | 469     | 446.7  | 373.8  | 324.4   | 0.697493313 | 388.175   | 403.475  | 15.3     | 0.962079435 | 0.7566  | -1.031 |
| 92585_at   | 535.3   | 612.6   | 637.7  | 671.5   | 455.3   | 714.2  | 460.2  | 688     | 0.671155058 | 614.275   | 579.425  | 34.85    | 1.060145834 | 0.5792  | -1.081 |
| 92586_at   | 660.9   | 724.6   | 481.1  | 655.9   | 605     | 747.9  | 515.7  | 583.6   | 0.814049374 | 630.625   | 613.05   | 17.575   | 1.028668135 | 0.8326  | -1.026 |
| 92587_at   | 3770.1  | 4014.8  | 3760.9 | 3248    | 4936.2  | 4085   | 4687.7 | 4663.3  | 0.010320346 | 3698.45   | 4593.05  | 894.6    | 0.805227463 | 0.01141 | 1.243  |
| 92589_at   | 878.1   | 776.5   | 1039.8 | 772     | 868.7   | 1028.3 | 1088.2 | 929.7   | 0.211618584 | 866.6     | 978.725  | 112.125  | 0.885437687 | 0.1959  | 1.134  |



|            |         |         |        |        |         |        |         |        |             |           |          |          |             |         |        |
|------------|---------|---------|--------|--------|---------|--------|---------|--------|-------------|-----------|----------|----------|-------------|---------|--------|
| 92590_at   | 63.7    | 87.4    | 117.1  | 134.4  | 90.8    | 121.7  | 157.3   | 106    | 0.421293501 | 100.65    | 118.95   | 18.3     | 0.846153846 | 0.394   | 1.205  |
| 92592_at   | 88.3    | 50      | 146.6  | 79.6   | 256.9   | 112.9  | 145.7   | 165.3  | 0.083085433 | 91.125    | 170.2    | 79.075   | 0.53539953  | 0.05862 | 1.919  |
| 92593_at   | 2696.4  | 2134.3  | 2061.6 | 2771   | 1936    | 3175.5 | 2275.1  | 2236.1 | 0.976231978 | 2415.825  | 2405.675 | 10.15    | 1.00421919  | 0.9265  | -1.013 |
| 92594_at   | 66.4    | 19.6    | 68.1   | 60.2   | 67.8    | 72.8   | 77.1    | 59.6   | 0.267742779 | 53.575    | 69.325   | 15.75    | 0.772809232 | 0.2819  | 1.436  |
| 92595_r_at | 89.1    | 58.5    | 67.3   | 88.6   | 83      | 82.3   | 77.1    | 89.4   | 0.436619191 | 75.875    | 82.95    | 7.075    | 0.914707655 | 0.3768  | -1.109 |
| 92596_at   | 915.2   | 656.7   | 768.2  | 948.9  | 665.7   | 864.5  | 731.7   | 667.8  | 0.321472816 | 822.25    | 732.425  | 89.825   | 1.122640543 | 0.3307  | -1.117 |
| 92597_s_at | 236.5   | 181.9   | 197.9  | 170.1  | 175.5   | 218.2  | 211.6   | 164.2  | 0.836821227 | 196.6     | 192.375  | 4.225    | 1.021962313 | 0.8377  | -1.022 |
| 92598_at   | 1661.9  | 1600    | 1640   | 1705.6 | 1474.2  | 1623.1 | 1775.2  | 1564.3 | 0.561061967 | 1651.875  | 1609.2   | 42.675   | 1.026519389 | 0.5184  | -1.029 |
| 92599_at   | 12.5    | 6.5     | 4      | 4      | 4.7     | 5.2    | 4.9     | 3.9    | 0.378259151 | 6.75      | 4.675    | 2.075    | 1.443850267 | 0.3927  | -1.291 |
| 92600_f_at | 24.2    | 20.8    | 18.1   | 10.5   | 25      | 9.9    | 19.3    | 20     | 0.973257012 | 18.4      | 18.55    | 0.15     | 0.991913747 | 1       | -1     |
| 92601_at   | 21.9    | 6.4     | 7.9    | 5.5    | 10      | 8.5    | 44.9    | 13     | 0.409820106 | 10.425    | 19.1     | 8.675    | 0.545811518 | 0.3275  | 1.685  |
| 92602_at   | 69.8    | 45.4    | 68.5   | 106.3  | 94.9    | 88.8   | 87.5    | 108.1  | 0.175199369 | 72.5      | 94.825   | 22.325   | 0.764566306 | 0.1361  | 1.364  |
| 92603_at   | 1272.9  | 1647.2  | 1285.5 | 1459.6 | 1387.9  | 1458.4 | 1154.5  | 1763.7 | 0.877312655 | 1416.3    | 1441.125 | 24.825   | 0.982773875 | 0.9166  | -1.012 |
| 92605_at   | 6.1     | 2.7     | 19.4   | 2.5    | 27.6    | 1.3    | 21.6    | 4      | 0.469719958 | 7.675     | 13.625   | 5.95     | 0.563302752 | 0.7218  | 1.383  |
| 92606_at   | 3       | 3.2     | 3.1    | 2.4    | 3.3     | 2.1    | 2.4     | 7.1    | 0.540282087 | 2.925     | 3.725    | 0.8      | 0.785234899 | 0.7161  | 1.114  |
| 92607_at   | 2510.1  | 1998.2  | 1763.6 | 1926   | 2106.4  | 2128.1 | 1798.3  | 2282.9 | 0.883101774 | 2049.475  | 2078.925 | 29.45    | 0.985834025 | 0.8385  | -1.019 |
| 92608_at   | 2310.2  | 3011.7  | 2699.1 | 2491.1 | 2105.7  | 2675.2 | 1905.4  | 2024.3 | 0.096101949 | 2628.025  | 2177.65  | 450.375  | 1.206816982 | 0.08629 | -1.211 |
| 92610_at   | 970.5   | 1008.4  | 972    | 1040   | 1136.2  | 928.4  | 951.7   | 1076.1 | 0.655841867 | 997.725   | 1023.1   | 25.375   | 0.975197928 | 0.6829  | -1.022 |
| 92611_at   | 1995.1  | 1787.2  | 1938.9 | 2325.8 | 1907    | 1603.8 | 1711.9  | 2545.7 | 0.783725064 | 2011.75   | 1942.1   | 69.65    | 1.035863241 | 0.6999  | -1.048 |
| 92612_at   | 8.2     | 11.8    | 28.6   | 37.1   | 15.5    | 25.6   | 6.2     | 34.7   | 0.92345549  | 21.425    | 20.5     | 0.925    | 1.045121951 | 0.9337  | -1.046 |
| 92614_at   | 846.8   | 1591.1  | 1409.6 | 878.6  | 2037.7  | 2000.4 | 2133    | 1596.9 | 0.018407216 | 1181.525  | 1942     | 760.475  | 0.608406282 | 0.02259 | 1.698  |
| 92615_at   | 3987.4  | 3163.2  | 3659.5 | 2727.6 | 3586.5  | 3508.5 | 3723.2  | 2813.2 | 0.948017268 | 3384.425  | 3407.85  | 23.425   | 0.993126165 | 0.9167  | -1.011 |
| 92616_at   | 4014.4  | 3819.2  | 3975.4 | 3483.4 | 3953.3  | 3918.2 | 4605    | 3301.3 | 0.698524006 | 3823.1    | 3944.45  | 121.35   | 0.969235255 | 0.7428  | -1.026 |
| 92617_at   | 353.7   | 369.4   | 504.7  | 485.7  | 357.5   | 557.2  | 677.7   | 435.6  | 0.375031522 | 428.375   | 507      | 78.625   | 0.844921105 | 0.3989  | 1.164  |
| 92618_at   | 141.9   | 154.5   | 144.3  | 237.9  | 184.2   | 217.5  | 133.9   | 155.4  | 0.919139427 | 169.65    | 172.75   | 3.1      | 0.982054993 | 0.8786  | -1.026 |
| 92619_at   | 1391    | 1267.5  | 1929.2 | 1584.5 | 1639.9  | 1728.9 | 1223.6  | 1772.4 | 0.809833369 | 1543.05   | 1591.2   | 48.15    | 0.969739819 | 0.801   | -1.033 |
| 92621_at   | 3224.4  | 4513.1  | 3375.3 | 4162.7 | 3145    | 3470.6 | 3150.6  | 3447.7 | 0.195114033 | 3818.875  | 3303.475 | 515.4    | 1.156017527 | 0.1623  | -1.146 |
| 92622_at   | 687.4   | 932.3   | 801.4  | 769    | 1018.4  | 810.3  | 879     | 697.7  | 0.547930134 | 797.525   | 851.35   | 53.825   | 0.936776884 | 0.5622  | -1.064 |
| 92623_at   | 3643.8  | 3433.7  | 3423.3 | 3408.2 | 3455.8  | 3455.2 | 3760    | 3653.2 | 0.315389103 | 3477.25   | 3581.05  | 103.8    | 0.971014088 | 0.3113  | -1.03  |
| 92624_r_at | 163     | 201.7   | 217.3  | 266.5  | 241.8   | 262.8  | 313.9   | 258.7  | 0.078414507 | 212.125   | 269.3    | 57.175   | 0.787690308 | 0.0749  | 1.283  |
| 92625_at   | 7235.8  | 7759.4  | 7329.8 | 6080.7 | 12244.9 | 6480.8 | 7721.8  | 6175.8 | 0.513728336 | 7101.425  | 8155.825 | 1054.4   | 0.870718168 | 0.5532  | 1.109  |
| 92626_at   | 262.6   | 392.9   | 427.5  | 237.3  | 597.3   | 347.8  | 496.2   | 340.1  | 0.193053897 | 330.075   | 445.35   | 115.275  | 0.741158639 | 0.1828  | 1.353  |
| 92628_at   | 10470.1 | 11917.6 | 9817.7 | 8328.9 | 22329.5 | 8907.2 | 11591.3 | 10760  | 0.364891257 | 10133.575 | 13397    | 3263.425 | 0.756406285 | 0.3379  | 1.249  |
| 92629_f_at | 3066.8  | 3253.9  | 3824.1 | 3754.5 | 2653.3  | 3229.8 | 2937.2  | 4168.3 | 0.574427289 | 3474.825  | 3247.15  | 227.675  | 1.070115332 | 0.5085  | -1.081 |
| 92630_r_at | 1176.8  | 1509.2  | 1900.2 | 1494.2 | 2342.2  | 1475.6 | 2075.5  | 2117.8 | 0.090278448 | 1520.1    | 2002.775 | 482.675  | 0.758996892 | 0.09705 | 1.317  |
| 92631_f_at | 808.4   | 608.8   | 712.1  | 814    | 656.7   | 750.6  | 673.4   | 884.3  | 0.941535935 | 735.825   | 741.25   | 5.425    | 0.992681282 | 0.9433  | -1.007 |
| 92632_at   | 1758.1  | 2204.1  | 2049.7 | 1915.9 | 2671.9  | 2137.6 | 2366.4  | 1967.6 | 0.151125368 | 1981.95   | 2285.875 | 303.925  | 0.867042161 | 0.1387  | 1.15   |
| 92633_at   | 694.2   | 762     | 712.9  | 777.6  | 983.3   | 845    | 1025.9  | 727.9  | 0.097545536 | 736.675   | 895.525  | 158.85   | 0.822618017 | 0.06374 | 1.206  |
| 92634_at   | 72.5    | 74.9    | 72.1   | 73.1   | 127.9   | 66     | 64.4    | 71.4   | 0.585757695 | 73.15     | 82.425   | 9.275    | 0.887473461 | 0.6538  | -1.08  |
| 92635_at   | 111.3   | 114.7   | 129.3  | 133    | 156.7   | 123.2  | 107.1   | 176.4  | 0.326331822 | 122.075   | 140.85   | 18.775   | 0.866702165 | 0.3363  | 1.135  |
| 92636_f_at | 5686.6  | 4710.3  | 4667.8 | 4587.5 | 7081.4  | 4636.2 | 5239    | 4654   | 0.480410348 | 4913.05   | 5402.65  | 489.6    | 0.909377805 | 0.4831  | -1.087 |
| 92637_at   | 1218.3  | 1522.7  | 1807.1 | 1380.3 | 1646.9  | 1527.2 | 1889    | 1349.5 | 0.499920735 | 1482.1    | 1603.15  | 121.05   | 0.924492406 | 0.4827  | -1.085 |
| 92638_at   | 159.6   | 196.5   | 201    | 218    | 154.3   | 221.5  | 239.7   | 199.1  | 0.673611669 | 193.775   | 203.65   | 9.875    | 0.951509944 | 0.7258  | -1.044 |
| 92639_at   | 651.3   | 644.4   | 684.6  | 713.3  | 548.7   | 542.8  | 526.1   | 517.8  | 0.001118677 | 673.4     | 533.85   | 139.55   | 1.261403016 | 0.00014 | -1.261 |
| 92640_at   | 4207.2  | 2562.4  | 2722.7 | 3346.1 | 2321.2  | 2965.6 | 2740.3  | 3679.8 | 0.57000909  | 3209.6    | 2926.725 | 282.875  | 1.096652402 | 0.5778  | -1.091 |
| 92642_at   | 102.3   | 86.7    | 62.5   | 81.4   | 68.3    | 102.5  | 123.6   | 110.8  | 0.261339104 | 83.225    | 101.3    | 18.075   | 0.821569595 | 0.2971  | 1.207  |
| 92643_at   | 403.5   | 813.6   | 625.1  | 669    | 749.1   | 674.5  | 806.5   | 943.1  | 0.163499187 | 627.8     | 793.3    | 165.5    | 0.791377789 | 0.1675  | 1.293  |
| 92644_s_at | 62.3    | 65.7    | 38     | 43.4   | 39.1    | 55.7   | 58.5    | 67.4   | 0.765661407 | 52.35     | 55.175   | 2.825    | 0.948799275 | 0.7442  | -1.063 |
| 92645_at   | 74.1    | 15.9    | 29.4   | 58.5   | 19.2    | 69.1   | 86.3    | 18.6   | 0.867107371 | 44.475    | 48.3     | 3.825    | 0.920807453 | 0.9831  | -1.012 |
| 92646_at   | 1971.4  | 2021    | 1774   | 1413.5 | 2622.9  | 1940.4 | 2013.9  | 2206.1 | 0.100085618 | 1794.975  | 2195.825 | 400.85   | 0.817449023 | 0.1014  | 1.227  |
| 92647_at   | 2714.6  | 2981.9  | 2750.9 | 2932.2 | 2897.1  | 2263.5 | 2689.6  | 2839.5 | 0.33233793  | 2844.9    | 2672.425 | 172.475  | 1.064538762 | 0.3163  | -1.069 |
| 92648_at   | 710.6   | 591.9   | 632    | 744.6  | 632.7   | 656    | 640.2   | 719.3  | 0.855667955 | 669.775   | 662.05   | 7.725    | 1.011668303 | 0.8888  | -1.009 |
| 92649_at   | 824.3   | 773.9   | 682.2  | 694.4  | 732.3   | 807.4  | 875.9   | 697.1  | 0.534179412 | 743.7     | 778.175  | 34.475   | 0.955697626 | 0.5373  | -1.045 |
| 92650_at   | 37.7    | 36.1    | 58.5   | 64.8   | 64.1    | 49.9   | 48.4    | 32.9   | 0.964415747 | 49.275    | 48.825   | 0.45     | 1.00921659  | 0.9915  | -1.002 |
| 92652_at   | 43.9    | 67.2    | 49.7   | 55.4   | 16.8    | 86.5   | 82.4    | 71.8   | 0.578158316 | 54.05     | 64.375   | 10.325   | 0.83961165  | 0.9746  | -1.013 |
| 92653_at   | 31.4    | 46.8    | 30.9   | 51.5   | 51.5    | 43.8   | 43.1    | 45.8   | 0.356261139 | 40.15     | 46.05    | 5.9      | 0.871878393 | 0.2895  | 1.175  |



|            |        |       |       |       |       |       |       |       |             |         |         |         |             |          |        |
|------------|--------|-------|-------|-------|-------|-------|-------|-------|-------------|---------|---------|---------|-------------|----------|--------|
| 92654_at   | 173.5  | 202   | 154   | 208.3 | 149   | 193.1 | 210.3 | 190.4 | 0.947330492 | 184.45  | 185.7   | 1.25    | 0.993268713 | 0.9538   | -1.006 |
| 92655_at   | 158.7  | 130.2 | 142.1 | 121.2 | 177.3 | 104   | 146.9 | 151.2 | 0.710488818 | 138.05  | 144.85  | 6.8     | 0.953054884 | 0.7914   | -1.036 |
| 92656_at   | 252.1  | 277.8 | 295   | 252.1 | 271.1 | 356.4 | 317.4 | 197.4 | 0.674375676 | 269.25  | 285.575 | 16.325  | 0.942834632 | 0.7881   | -1.038 |
| 92658_at   | 108.3  | 60    | 97.2  | 65.4  | 50.7  | 17.7  | 35    | 20.5  | 0.013727079 | 82.725  | 30.975  | 51.75   | 2.670702179 | 0.01039  | -2.831 |
| 92659_at   | 22.2   | 41    | 49.8  | 31.2  | 15.6  | 40.4  | 36.9  | 46.5  | 0.898252477 | 36.05   | 34.85   | 1.2     | 1.034433286 | 0.8286   | -1.071 |
| 92660_f_at | 1095.3 | 905.2 | 889   | 826.9 | 751.1 | 967.7 | 722.2 | 715.9 | 0.144495731 | 929.1   | 789.225 | 139.875 | 1.177230828 | 0.126    | -1.18  |
| 92661_at   | 14.2   | 93.8  | 75.6  | 62.3  | 100.9 | 84.2  | 199.1 | 80.3  | 0.157004901 | 61.475  | 116.125 | 54.65   | 0.529386437 | 0.1582   | 2.155  |
| 92662_g_at | 35.2   | 273.2 | 177.7 | 111   | 329.7 | 258.8 | 616.9 | 214.1 | 0.10775221  | 149.275 | 354.875 | 205.6   | 0.420641071 | 0.08625  | 2.777  |
| 92663_at   | 67     | 166.8 | 179.4 | 154.4 | 188.8 | 270.3 | 297.9 | 317.2 | 0.016108494 | 141.9   | 268.55  | 126.65  | 0.528393223 | 0.03716  | 1.987  |
| 92664_at   | 170.6  | 267   | 265.6 | 201.4 | 225.5 | 239.7 | 234.1 | 252.2 | 0.664008902 | 226.15  | 237.875 | 11.725  | 0.950709406 | 0.5702   | -1.07  |
| 92665_f_at | 244.7  | 201   | 304.4 | 192.7 | 345.8 | 327.1 | 298.9 | 298.5 | 0.041186824 | 235.7   | 317.575 | 81.875  | 0.742186885 | 0.03013  | 1.368  |
| 92666_at   | 59.5   | 64.3  | 73    | 96.8  | 106.1 | 193.7 | 215.3 | 95.7  | 0.075046634 | 73.4    | 152.7   | 79.3    | 0.480681074 | 0.0252   | 1.989  |
| 92667_at   | 406.6  | 306.6 | 294.3 | 337.2 | 287.3 | 306.5 | 253.5 | 495.2 | 0.993084809 | 336.175 | 335.625 | 0.55    | 1.001638734 | 0.8692   | -1.028 |
| 92668_at   | 112.4  | 59.8  | 110   | 41    | 36    | 101.5 | 40    | 115.7 | 0.793197346 | 80.8    | 73.3    | 7.5     | 1.102319236 | 0.7225   | -1.157 |
| 92670_at   | 67.1   | 110   | 105.8 | 77.8  | 88.2  | 115.2 | 120.6 | 89.8  | 0.363779646 | 90.175  | 103.45  | 13.275  | 0.871677139 | 0.3461   | 1.16   |
| 92671_f_at | 40     | 84.6  | 40.8  | 63.1  | 41.5  | 49.9  | 21.9  | 50.4  | 0.251939441 | 57.125  | 40.925  | 16.2    | 1.39584606  | 0.2589   | -1.395 |
| 92672_at   | 65.9   | 74.7  | 89.4  | 156.4 | 72.7  | 131.5 | 46.1  | 190.5 | 0.735779771 | 96.6    | 110.2   | 13.6    | 0.876588022 | 0.8966   | -1.051 |
| 92673_at   | 87.6   | 81.7  | 112.2 | 127.2 | 17.8  | 25.6  | 12.2  | 29.8  | 0.002472112 | 102.175 | 21.35   | 80.825  | 4.785714286 | 0.000381 | -4.983 |
| 92674_at   | 5.3    | 9.4   | 7.5   | 9.9   | 18.9  | 13.9  | 6.8   | 11.9  | 0.148067194 | 8.025   | 12.875  | 4.85    | 0.623300971 | 0.1426   | 1.545  |
| 92676_at   | 14.6   | 3.5   | 4.9   | 7.4   | 5.2   | 6.1   | 10.7  | 5.8   | 0.825053615 | 7.6     | 6.95    | 0.65    | 1.09352518  | 0.9501   | -1.023 |
| 92677_s_at | 136.3  | 104.4 | 151.9 | 102.6 | 66.4  | 88.2  | 62.8  | 153.5 | 0.258920643 | 123.8   | 92.725  | 31.075  | 1.335130763 | 0.1818   | -1.408 |
| 92678_at   | 381.6  | 349.1 | 344.6 | 419.2 | 321.9 | 472.9 | 282.5 | 492.8 | 0.752950273 | 373.625 | 392.525 | 18.9    | 0.951850201 | 0.8745   | -1.024 |
| 92681_at   | 34.9   | 50.2  | 48.1  | 67    | 36.1  | 52.3  | 77.4  | 76.1  | 0.421257741 | 50.05   | 60.475  | 10.425  | 0.827614717 | 0.4798   | 1.185  |
| 92682_at   | 55.6   | 18.4  | 38.4  | 21.6  | 21.9  | 15.6  | 28.6  | 16.3  | 0.233659117 | 33.5    | 20.6    | 12.9    | 1.626213592 | 0.2038   | -1.518 |
| 92683_at   | 22.6   | 3.1   | 17.7  | 27.7  | 5.8   | 10.9  | 16.8  | 17.4  | 0.439937187 | 17.775  | 12.725  | 5.05    | 1.396856582 | 0.7983   | -1.163 |
| 92684_at   | 9.8    | 10.7  | 13.1  | 14.8  | 8.1   | 10.7  | 17.4  | 14.6  | 0.809503198 | 12.1    | 12.7    | 0.6     | 0.952755906 | 0.9182   | -1.021 |
| 92685_at   | 53.9   | 111.3 | 64.2  | 154.5 | 190.5 | 156.6 | 156.1 | 205.7 | 0.030365199 | 95.975  | 177.225 | 81.25   | 0.541543236 | 0.03363  | 2.003  |
| 92686_at   | 333.9  | 603.9 | 453.9 | 566.4 | 410.9 | 416.7 | 429.3 | 363.1 | 0.261076592 | 489.525 | 405     | 84.525  | 1.208703704 | 0.2769   | -1.18  |
| 92687_at   | 23.6   | 11.3  | 21.4  | 8.3   | 11    | 34.6  | 18.1  | 7.2   | 0.833788654 | 16.15   | 17.725  | 1.575   | 0.911142454 | 0.9848   | -1.008 |
| 92688_at   | 367.7  | 265.9 | 294.5 | 314.9 | 244.2 | 311   | 296.1 | 328.6 | 0.59591989  | 310.75  | 294.975 | 15.775  | 1.053479108 | 0.6045   | -1.053 |
| 92689_at   | 66.9   | 35.1  | 105   | 62.6  | 97.9  | 99.5  | 33    | 78.2  | 0.660921297 | 67.4    | 77.15   | 9.75    | 0.873622813 | 0.737    | 1.129  |
| 92690_at   | 36.8   | 51.3  | 104   | 98.7  | 83.7  | 30.6  | 76    | 105.8 | 0.956101608 | 72.7    | 74.025  | 1.325   | 0.982100642 | 0.9702   | -1.015 |
| 92691_at   | 126.5  | 121.9 | 174.9 | 98.1  | 150.5 | 150.3 | 102.7 | 206.2 | 0.440342564 | 130.35  | 152.425 | 22.075  | 0.855174676 | 0.4556   | 1.16   |
| 92692_at   | 62.7   | 86.1  | 106.5 | 140.7 | 95.1  | 109.8 | 109.5 | 75.5  | 0.937627405 | 99      | 97.475  | 1.525   | 1.015645037 | 0.9364   | -1.016 |
| 92693_at   | 68.2   | 45.7  | 43.7  | 55.6  | 69.7  | 45.8  | 48    | 113.1 | 0.396594603 | 53.3    | 69.15   | 15.85   | 0.770788142 | 0.4084   | 1.23   |
| 92694_at   | 60.4   | 32.1  | 54.3  | 63.6  | 53.3  | 36.2  | 62.2  | 89.1  | 0.587157548 | 52.6    | 60.2    | 7.6     | 0.873754153 | 0.6487   | 1.124  |
| 92695_at   | 32.9   | 43.5  | 52.9  | 74.9  | 52.7  | 62.3  | 50.2  | 41.4  | 0.95445812  | 51.05   | 51.65   | 0.6     | 0.988383349 | 0.8201   | -1.047 |
| 92696_at   | 63.7   | 63.9  | 46.1  | 79.4  | 87.4  | 65.7  | 9.1   | 95    | 0.962825149 | 63.275  | 64.3    | 1.025   | 0.984059098 | 0.6446   | -1.316 |
| 92697_at   | 23.6   | 40.2  | 29.5  | 19.5  | 58.2  | 38.3  | 8.4   | 90.2  | 0.321458006 | 28.2    | 48.775  | 20.575  | 0.578165044 | 0.6181   | 1.327  |
| 92698_at   | 165.1  | 192.2 | 213.2 | 166.2 | 193.4 | 185.5 | 171.6 | 241.8 | 0.496555958 | 184.175 | 198.075 | 13.9    | 0.929824561 | 0.4922   | -1.073 |
| 92699_at   | 44.8   | 57.3  | 114.5 | 126   | 90.8  | 111   | 101   | 93.6  | 0.559574284 | 85.65   | 99.1    | 13.45   | 0.864278507 | 0.397    | 1.266  |
| 92700_at   | 251.3  | 377.2 | 432.8 | 373.8 | 396.5 | 472   | 485.5 | 403.7 | 0.131674501 | 358.775 | 439.425 | 80.65   | 0.816464698 | 0.14     | 1.244  |
| 92701_at   | 155.9  | 318   | 271.6 | 300.4 | 263.6 | 306.7 | 273   | 294.9 | 0.579404098 | 261.475 | 284.55  | 23.075  | 0.918907046 | 0.5037   | 1.126  |
| 92702_at   | 11.6   | 26.2  | 29.7  | 34.8  | 43.9  | 30.5  | 7.2   | 26.8  | 0.872874253 | 25.575  | 27.1    | 1.525   | 0.943726937 | 0.9209   | -1.049 |
| 92703_at   | 767.4  | 803.6 | 859.6 | 608   | 838.8 | 881.6 | 814.6 | 857.5 | 0.200186313 | 759.65  | 848.125 | 88.475  | 0.895681651 | 0.1768   | 1.125  |
| 92704_at   | 83.1   | 145.3 | 179.2 | 177.3 | 39.5  | 150.3 | 105.5 | 149.1 | 0.347071601 | 146.225 | 111.1   | 35.125  | 1.316156616 | 0.368    | -1.423 |
| 92705_at   | 333.3  | 670.8 | 615.9 | 519.4 | 618.8 | 672.9 | 698.3 | 572.1 | 0.256024961 | 534.85  | 640.525 | 105.675 | 0.835018149 | 0.2407   | 1.235  |
| 92706_at   | 49.8   | 15.1  | 68    | 17.4  | 19    | 57.2  | 39.8  | 102.7 | 0.468805354 | 37.575  | 54.675  | 17.1    | 0.687242798 | 0.4636   | 1.497  |
| 92707_at   | 0.9    | 11.3  | 1.2   | 4.1   | 6.5   | 10.5  | 6     | 9.2   | 0.235065116 | 4.375   | 8.05    | 3.675   | 0.543478261 | 0.1217   | 2.914  |
| 92708_at   | 327    | 279.1 | 323.9 | 292.9 | 327   | 213.4 | 360.3 | 329.7 | 0.95924935  | 305.725 | 307.6   | 1.875   | 0.993904421 | 0.933    | -1.011 |
| 92710_at   | 168.6  | 245.1 | 180.1 | 150.3 | 243.2 | 219.1 | 188.9 | 219.6 | 0.239024998 | 186.025 | 217.7   | 31.675  | 0.854501608 | 0.195    | 1.186  |
| 92711_at   | 112.6  | 146.5 | 149.7 | 146.4 | 170.1 | 145.9 | 197.1 | 151.6 | 0.111134333 | 138.8   | 166.175 | 27.375  | 0.835264029 | 0.1093   | 1.197  |
| 92712_at   | 73.6   | 66.2  | 76.4  | 82.1  | 68.5  | 69.4  | 69.7  | 83.7  | 0.73392912  | 74.575  | 72.825  | 1.75    | 1.024030209 | 0.719    | -1.025 |
| 92713_at   | 13     | 12.7  | 17.3  | 11.3  | 17    | 13    | 19.7  | 14.1  | 0.278320768 | 13.575  | 15.95   | 2.375   | 0.851097179 | 0.2618   | 1.176  |
| 92714_at   | 53.3   | 82.4  | 23.7  | 37.6  | 114.6 | 20.7  | 62.7  | 131.1 | 0.300081979 | 49.25   | 82.275  | 33.025  | 0.598602249 | 0.4495   | 1.494  |
| 92715_at   | 14.5   | 21.9  | 65.3  | 67    | 58    | 36.6  | 33.8  | 15.5  | 0.721218896 | 42.175  | 35.975  | 6.2     | 1.172341904 | 0.9093   | -1.058 |



|            |        |        |        |        |        |        |        |        |             |          |          |         |             |          |        |
|------------|--------|--------|--------|--------|--------|--------|--------|--------|-------------|----------|----------|---------|-------------|----------|--------|
| 92717_at   | 16.5   | 12.3   | 26.2   | 10.7   | 24.4   | 3.3    | 32.3   | 36.4   | 0.396315549 | 16.425   | 24.1     | 7.675   | 0.68153527  | 0.8389   | 1.135  |
| 92718_at   | 250    | 207.7  | 273.4  | 227    | 438.4  | 308.8  | 370.2  | 266.2  | 0.059214883 | 239.525  | 345.9    | 106.375 | 0.692468922 | 0.02832  | 1.426  |
| 92722_f_at | 12.3   | 36.1   | 8.8    | 9.1    | 13.2   | 36.2   | 14.5   | 19.3   | 0.634834825 | 16.575   | 20.8     | 4.225   | 0.796875    | 0.4387   | 1.395  |
| 92724_at   | 219.1  | 334    | 304.3  | 285.4  | 437.8  | 441.7  | 384    | 437.3  | 0.004803998 | 285.7    | 425.2    | 139.5   | 0.671919097 | 0.005525 | 1.504  |
| 92725_at   | 115.6  | 191.6  | 131.8  | 136.5  | 130    | 141.9  | 168.5  | 113.6  | 0.799785119 | 143.875  | 138.5    | 5.375   | 1.038808664 | 0.8315   | -1.031 |
| 92726_at   | 102.3  | 61.7   | 88.3   | 75.3   | 50.8   | 51.5   | 103.9  | 76.8   | 0.497162496 | 81.9     | 70.75    | 11.15   | 1.157597173 | 0.4245   | -1.191 |
| 92727_at   | 73.5   | 130.8  | 97     | 112.5  | 60.5   | 118.6  | 113.4  | 174.5  | 0.636401785 | 103.45   | 116.75   | 13.3    | 0.88608137  | 0.7742   | -1.078 |
| 92728_at   | 7.3    | 9.3    | 18.7   | 7.8    | 14.7   | 13     | 9.9    | 7.4    | 0.885353955 | 10.775   | 11.25    | 0.475   | 0.957777778 | 0.7656   | -1.086 |
| 92730_at   | 142.1  | 170.3  | 143    | 189    | 182.7  | 164.2  | 144.6  | 176.5  | 0.692145759 | 161.1    | 167      | 5.9     | 0.964670659 | 0.6662   | -1.04  |
| 92731_at   | 176.4  | 68.2   | 87.4   | 132.1  | 135    | 157.4  | 159.2  | 165.7  | 0.212271897 | 116.025  | 154.325  | 38.3    | 0.751822453 | 0.1578   | 1.418  |
| 92732_at   | 14.9   | 5.7    | 6.4    | 25.6   | 33.1   | 13.1   | 5.7    | 4.4    | 0.913139582 | 13.15    | 14.075   | 0.925   | 0.934280639 | 0.9138   | -1.067 |
| 92733_at   | 2      | 17     | 13.9   | 5.6    | 2      | 4.5    | 25     | 2.7    | 0.875519824 | 9.625    | 8.55     | 1.075   | 1.125730994 | 0.6497   | -1.429 |
| 92734_at   | 5.2    | 18.5   | 12.1   | 4.6    | 10.1   | 3.6    | 18.3   | 13.2   | 0.798349885 | 10.1     | 11.3     | 1.2     | 0.89380531  | 0.798    | 1.138  |
| 92735_at   | 13.2   | 11.7   | 14.7   | 20.3   | 20.2   | 44.4   | 13.8   | 18.6   | 0.272061763 | 14.975   | 24.25    | 9.275   | 0.617525773 | 0.1968   | 1.493  |
| 92736_at   | 87.2   | 133.8  | 141.8  | 88.1   | 147.7  | 113.7  | 94.3   | 142.8  | 0.559739807 | 112.725  | 124.625  | 11.9    | 0.904513541 | 0.5378   | -1.116 |
| 92737_at   | 7.1    | 3.9    | 6      | 4.1    | 4.5    | 4.7    | 11.5   | 3.4    | 0.726836423 | 5.275    | 6.025    | 0.75    | 0.875518672 | 0.8705   | -1.052 |
| 92738_at   | 351.8  | 497.7  | 453.9  | 551    | 304.3  | 334.8  | 303.3  | 407.5  | 0.051004681 | 463.6    | 337.475  | 126.125 | 1.373731388 | 0.03898  | -1.366 |
| 92739_at   | 5.2    | 4.8    | 5.1    | 9.1    | 28.7   | 8      | 5.7    | 14.1   | 0.216609411 | 6.05     | 14.125   | 8.075   | 0.428318584 | 0.1177   | 2.012  |
| 92740_at   | 3.9    | 3.3    | 2.7    | 2.9    | 2.5    | 1.9    | 1.3    | 2.3    | 0.018433466 | 3.2      | 2        | 1.2     | 1.6         | 0.02637  | -1.626 |
| 92741_g_at | 5.2    | 8.5    | 4.8    | 13.8   | 20     | 4.9    | 4.4    | 7.5    | 0.800648708 | 8.075    | 9.2      | 1.125   | 0.877717391 | 0.958    | -1.023 |
| 92742_at   | 26.1   | 6.3    | 6.3    | 3.8    | 3.6    | 27.4   | 27.7   | 9.9    | 0.448934924 | 10.625   | 17.15    | 6.525   | 0.619533528 | 0.4837   | 1.612  |
| 92743_at   | 39.3   | 38.9   | 48.7   | 48.7   | 55.2   | 32.8   | 57.8   | 73.7   | 0.289398149 | 43.9     | 54.875   | 10.975  | 0.8         | 0.3373   | 1.208  |
| 92744_at   | 48.2   | 59.4   | 32.8   | 41.4   | 30.3   | 71.6   | 65.1   | 87.6   | 0.239879235 | 45.45    | 63.65    | 18.2    | 0.714061273 | 0.315    | 1.335  |
| 92745_at   | 60.3   | 59.3   | 59.7   | 62.6   | 55.1   | 72     | 60.1   | 85     | 0.339300614 | 60.475   | 68.05    | 7.575   | 0.888684791 | 0.3257   | -1.11  |
| 92746_at   | 163.9  | 133.8  | 115.2  | 230.3  | 132.8  | 185.1  | 158.3  | 154.8  | 0.916754302 | 160.8    | 157.75   | 3.05    | 1.01933439  | 0.9599   | -1.009 |
| 92747_at   | 7.1    | 40.7   | 5.6    | 28.8   | 28.6   | 28.3   | 27.3   | 31.4   | 0.401909906 | 20.55    | 28.9     | 8.35    | 0.711072664 | 0.2228   | 1.964  |
| 92749_at   | 112.2  | 104.1  | 107.9  | 139.7  | 117.1  | 161.8  | 137.4  | 144.7  | 0.09646859  | 115.975  | 140.25   | 24.275  | 0.826916221 | 0.08998  | 1.21   |
| 92750_s_at | 5.8    | 4.8    | 8.7    | 5.5    | 5.1    | 5.6    | 10.3   | 4.6    | 0.903543986 | 6.2      | 6.4      | 0.2     | 0.96875     | 0.9842   | -1.005 |
| 92751_i_at | 5      | 11.8   | 14.5   | 21.7   | 24.2   | 13.5   | 11.3   | 14.1   | 0.595040044 | 13.25    | 15.775   | 2.525   | 0.839936609 | 0.4945   | 1.29   |
| 92752_r_at | 58.6   | 77.4   | 84     | 73     | 97     | 45.2   | 88.9   | 68     | 0.910500999 | 73.25    | 74.775   | 1.525   | 0.979605483 | 0.9509   | -1.012 |
| 92753_at   | 58.6   | 55.6   | 33.4   | 72     | 61     | 69.9   | 92.3   | 50.5   | 0.301858141 | 54.9     | 68.425   | 13.525  | 0.802338327 | 0.3042   | 1.261  |
| 92754_at   | 1375.1 | 1339.8 | 1279.8 | 1293.4 | 1599.3 | 1239   | 1487.5 | 1230.4 | 0.524805063 | 1322.025 | 1389.05  | 67.025  | 0.951747597 | 0.5473   | -1.044 |
| 92755_f_at | 2339.6 | 2096   | 2384.5 | 1760.6 | 3175.6 | 2064.9 | 2891.1 | 2346.6 | 0.166158113 | 2145.175 | 2619.55  | 474.375 | 0.818909736 | 0.1595   | 1.212  |
| 92756_r_at | 2197.9 | 2087.4 | 2360.4 | 1899.3 | 2874.1 | 2132.5 | 2400.8 | 2123.1 | 0.278366232 | 2136.25  | 2382.625 | 246.375 | 0.896595142 | 0.2624   | -1.11  |
| 92757_at   | 19.6   | 80.3   | 67.8   | 116.4  | 20.9   | 76.6   | 23.3   | 21.3   | 0.19968453  | 71.025   | 35.525   | 35.5    | 1.99929627  | 0.2173   | -1.988 |
| 92758_at   | 177.4  | 163    | 279.3  | 316.2  | 320.5  | 199.5  | 238    | 341.1  | 0.450081453 | 233.975  | 274.775  | 40.8    | 0.851514876 | 0.4247   | 1.194  |
| 92759_at   | 31     | 23.2   | 32.4   | 18.5   | 21.6   | 25.1   | 18     | 14     | 0.160006115 | 26.275   | 19.675   | 6.6     | 1.33545108  | 0.1656   | -1.333 |
| 92760_at   | 116.1  | 94.4   | 114.6  | 77.5   | 74.5   | 80     | 104.7  | 53.9   | 0.159375653 | 100.65   | 78.275   | 22.375  | 1.285851166 | 0.162    | -1.304 |
| 92761_at   | 33.1   | 9.4    | 43.9   | 10.5   | 54.4   | 44.4   | 7      | 56.9   | 0.299083007 | 24.225   | 40.675   | 16.45   | 0.595574677 | 0.4851   | 1.608  |
| 92762_at   | 5      | 22.8   | 15.7   | 5      | 5.8    | 29.2   | 31.9   | 10.7   | 0.395336422 | 12.125   | 19.4     | 7.275   | 0.625       | 0.4458   | 1.59   |
| 92763_at   | 77.5   | 34.8   | 64.7   | 54.4   | 20.5   | 43.7   | 46.1   | 27     | 0.081519961 | 57.85    | 34.325   | 23.525  | 1.685360524 | 0.08549  | -1.706 |
| 92764_at   | 123.9  | 152.2  | 214.1  | 155.7  | 155    | 168.4  | 150.9  | 162.8  | 0.916054724 | 161.475  | 159.275  | 2.2     | 1.013812588 | 0.967    | -1.005 |
| 92765_s_at | 56.9   | 41     | 69.9   | 99.2   | 70.3   | 51.8   | 117.5  | 70.5   | 0.585241628 | 66.75    | 77.525   | 10.775  | 0.861012577 | 0.5568   | 1.169  |
| 92766_at   | 137.5  | 70     | 211.6  | 200.8  | 246.1  | 194    | 252.1  | 225    | 0.103587589 | 154.975  | 229.3    | 74.325  | 0.675861317 | 0.121    | 1.604  |
| 92767_at   | 749.1  | 467.6  | 710.1  | 574.2  | 322.8  | 562    | 454.9  | 467.3  | 0.079594831 | 625.25   | 451.75   | 173.5   | 1.384061981 | 0.08381  | -1.387 |
| 92768_s_at | 548.6  | 359.3  | 446.3  | 322.5  | 401.5  | 328.4  | 404.7  | 542.7  | 0.998296236 | 419.175  | 419.325  | 0.15    | 0.999642282 | 0.9753   | -1.005 |
| 92769_at   | 547    | 1038.7 | 805.1  | 835.3  | 774.2  | 803    | 868.9  | 919.2  | 0.760819675 | 806.525  | 841.325  | 34.8    | 0.958636674 | 0.6539   | -1.068 |
| 92770_at   | 4136.4 | 3260.5 | 3549.3 | 3128.5 | 3311.9 | 3243.1 | 3086.8 | 2718.1 | 0.161852737 | 3518.675 | 3089.975 | 428.7   | 1.138738987 | 0.1457   | -1.135 |
| 92771_at   | 2785.9 | 1875   | 2072.1 | 2374.2 | 1652.7 | 1856.8 | 1933.6 | 2339.8 | 0.22998844  | 2276.8   | 1945.725 | 331.075 | 1.170155084 | 0.2193   | -1.166 |
| 92773_at   | 820.7  | 679.2  | 690.8  | 859.1  | 1298.7 | 960.9  | 1000.1 | 769.7  | 0.107424088 | 762.45   | 1007.35  | 244.9   | 0.756886881 | 0.07281  | 1.305  |
| 92774_at   | 59.8   | 108.2  | 63.5   | 98.8   | 91.2   | 71.3   | 83.9   | 105    | 0.724950045 | 82.575   | 87.85    | 5.275   | 0.939954468 | 0.6339   | -1.09  |
| 92775_at   | 876.1  | 1433.8 | 1159.7 | 1290.9 | 1905.7 | 1438.4 | 1574.1 | 1248.8 | 0.103233163 | 1190.125 | 1541.75  | 351.625 | 0.771931247 | 0.1053   | 1.301  |
| 92777_at   | 111.1  | 126.5  | 130    | 104.3  | 109.2  | 133.2  | 108.4  | 134    | 0.744298327 | 117.975  | 121.2    | 3.225   | 0.973391089 | 0.7549   | -1.026 |
| 92778_i_at | 516.6  | 594.5  | 622    | 642.1  | 616.2  | 607    | 695.9  | 696.7  | 0.154496147 | 593.8    | 653.95   | 60.15   | 0.908020491 | 0.1599   | -1.103 |
| 92779_f_at | 8.8    | 2.9    | 4.7    | 3.5    | 33.6   | 29.9   | 17.7   | 4.9    | 0.081627839 | 4.975    | 21.525   | 16.55   | 0.231126597 | 0.03771  | 3.812  |
| 92780_f_at | 6.2    | 11.3   | 12.1   | 16.4   | 12.8   | 24     | 12.7   | 30.9   | 0.152155998 | 11.5     | 20.1     | 8.6     | 0.572139303 | 0.1273   | 1.716  |



|            |        |        |        |        |         |        |        |        |             |          |          |         |             |          |        |
|------------|--------|--------|--------|--------|---------|--------|--------|--------|-------------|----------|----------|---------|-------------|----------|--------|
| 92781_at   | 84.6   | 83.9   | 94.9   | 119.3  | 76.8    | 103.5  | 103.8  | 113.6  | 0.754083241 | 95.675   | 99.425   | 3.75    | 0.962283128 | 0.7589   | -1.039 |
| 92782_at   | 1329.7 | 1440.4 | 1542.7 | 1450.1 | 727.4   | 1382.2 | 745    | 986.1  | 0.046397581 | 1440.725 | 960.175  | 480.55  | 1.500481683 | 0.02837  | -1.552 |
| 92783_at   | 433.4  | 396    | 433.2  | 356.3  | 355.4   | 415.3  | 387.7  | 440.6  | 0.854253678 | 404.725  | 399.75   | 4.975   | 1.012445278 | 0.8566   | -1.012 |
| 92784_at   | 7.7    | 5.2    | 3.9    | 2.4    | 4.2     | 11.6   | 3.1    | 14.2   | 0.304831646 | 4.8      | 8.275    | 3.475   | 0.580060423 | 0.3717   | 1.544  |
| 92786_at   | 1174.7 | 1063.9 | 1265.9 | 1270.1 | 559.1   | 1016.7 | 627.7  | 512.6  | 0.014321354 | 1193.65  | 679.025  | 514.625 | 1.757888148 | 0.009156 | -1.821 |
| 92787_at   | 1209.1 | 1670   | 1692.3 | 1373.9 | 1593.7  | 2046.7 | 1958.2 | 1974   | 0.040431602 | 1486.325 | 1893.15  | 406.825 | 0.785106833 | 0.04674  | 1.28   |
| 92788_f_at | 3106.3 | 2513.6 | 2362.6 | 3226.5 | 2624.1  | 2684.8 | 2492.4 | 3009.2 | 0.697705551 | 2802.25  | 2702.625 | 99.625  | 1.03686231  | 0.7429   | -1.03  |
| 92789_r_at | 257.5  | 202.2  | 225    | 342.1  | 200.9   | 257.9  | 380.4  | 233.6  | 0.825276373 | 256.7    | 268.2    | 11.5    | 0.957121551 | 0.8521   | -1.035 |
| 92790_at   | 1839.7 | 1179   | 1780.4 | 1795.5 | 1360.7  | 1176.3 | 1241.1 | 1186.8 | 0.076735713 | 1648.65  | 1241.225 | 407.425 | 1.328244275 | 0.05236  | -1.31  |
| 92792_at   | 2.7    | 5.3    | 8.5    | 8.6    | 6.1     | 8      | 5.2    | 17.9   | 0.400920247 | 6.275    | 9.3      | 3.025   | 0.674731183 | 0.3817   | 1.439  |
| 92793_at   | 646.4  | 1011.8 | 657.1  | 623.6  | 948     | 901    | 886.1  | 932.9  | 0.14282498  | 734.725  | 917      | 182.275 | 0.801226827 | 0.08029  | 1.274  |
| 92794_f_at | 353.6  | 294.7  | 344.3  | 407.5  | 280.1   | 328.4  | 325.6  | 369.2  | 0.443902629 | 350.025  | 325.825  | 24.2    | 1.074272999 | 0.4537   | -1.072 |
| 92795_at   | 360.2  | 569.5  | 388.7  | 453    | 494.7   | 530.2  | 637.6  | 467.6  | 0.185274858 | 442.85   | 532.525  | 89.675  | 0.83160415  | 0.1629   | 1.213  |
| 92796_at   | 425.8  | 516.2  | 536.8  | 479.4  | 227.5   | 229.1  | 284    | 296.7  | 0.000395789 | 489.55   | 259.325  | 230.225 | 1.887785597 | 0.000316 | -1.895 |
| 92797_at   | 1013.2 | 1407.1 | 1045.3 | 1160.2 | 944.1   | 1157.9 | 959.3  | 1275.6 | 0.569752985 | 1156.45  | 1084.225 | 72.225  | 1.066614402 | 0.561    | -1.066 |
| 92798_at   | 5403.7 | 5399.8 | 4861.5 | 5012.8 | 5436.4  | 4266   | 4511.7 | 4539.3 | 0.164774933 | 5169.45  | 4688.35  | 481.1   | 1.102616059 | 0.1382   | -1.106 |
| 92799_g_at | 9201.5 | 8043.9 | 7693.5 | 8063.5 | 10406   | 7085.4 | 7886.6 | 7397   | 0.948223241 | 8250.6   | 8193.75  | 56.85   | 1.006938215 | 0.8685   | -1.016 |
| 92800_i_at | 7471.6 | 7180.1 | 7462.9 | 7586.2 | 9985.4  | 6618.3 | 8946.9 | 5120.6 | 0.840337538 | 7425.2   | 7667.8   | 242.6   | 0.968361199 | 0.9959   | -1.001 |
| 92801_at   | 234    | 181.3  | 204    | 335.7  | 132.6   | 250.6  | 182.6  | 162.7  | 0.23306922  | 238.75   | 182.125  | 56.625  | 1.310912835 | 0.2021   | -1.31  |
| 92802_s_at | 792.7  | 751    | 942.8  | 656.5  | 469.3   | 835.6  | 561.9  | 500.8  | 0.112788883 | 785.75   | 591.9    | 193.85  | 1.327504646 | 0.09026  | -1.352 |
| 92803_at   | 122.1  | 19.8   | 13.8   | 80.2   | 33.5    | 16.3   | 129.8  | 57.7   | 0.992545549 | 58.975   | 59.325   | 0.35    | 0.994100295 | 0.8884   | 1.105  |
| 92804_at   | 1348   | 955.8  | 1280   | 1097.2 | 1130.2  | 970.1  | 1077   | 1068.5 | 0.31867202  | 1170.25  | 1061.45  | 108.8   | 1.102501295 | 0.3254   | -1.094 |
| 92805_s_at | 436.5  | 310.6  | 548.5  | 242.9  | 490.3   | 348.5  | 225.4  | 430.3  | 0.905525802 | 384.625  | 373.625  | 11      | 1.029441285 | 0.9335   | -1.022 |
| 92806_at   | 1143.1 | 1114.4 | 1025.9 | 1009.5 | 1234.6  | 1355.4 | 1369.6 | 1128   | 0.030539097 | 1073.225 | 1271.9   | 198.675 | 0.843796682 | 0.02186  | 1.183  |
| 92807_at   | 8969.6 | 8266.4 | 7818   | 7337.6 | 10029.3 | 8028.6 | 8872.9 | 6551.5 | 0.752261707 | 8097.9   | 8370.575 | 272.675 | 0.96742458  | 0.8183   | -1.024 |
| 92808_f_at | 2719.4 | 2723.3 | 3289.9 | 2928.7 | 2437.4  | 2606.3 | 2611.1 | 2642.5 | 0.079148101 | 2915.325 | 2574.325 | 341     | 1.132461907 | 0.04542  | -1.13  |
| 92809_r_at | 1390   | 1082.8 | 1541.8 | 1484.2 | 986.6   | 1331.5 | 1437   | 1379.5 | 0.550324287 | 1374.7   | 1283.65  | 91.05   | 1.07093055  | 0.5717   | -1.072 |
| 92810_at   | 2003.7 | 1813   | 2296.6 | 2098.2 | 1595.7  | 1834.3 | 1674.1 | 1717.1 | 0.032095147 | 2052.875 | 1705.3   | 347.575 | 1.203820442 | 0.01845  | -1.201 |
| 92811_at   | 8.7    | 14.9   | 3.8    | 8.5    | 7.7     | 8.2    | 11.7   | 4      | 0.712794234 | 8.975    | 7.9      | 1.075   | 1.136075949 | 0.8156   | -1.093 |
| 92812_f_at | 262.3  | 143.7  | 241.5  | 207.1  | 278.5   | 248.5  | 195.9  | 115.4  | 0.92975781  | 213.65   | 209.575  | 4.075   | 1.019444113 | 0.8499   | -1.048 |
| 92813_at   | 1.6    | 3      | 1.2    | 7.8    | 0.9     | 13.4   | 4.2    | 9.9    | 0.302316138 | 3.4      | 7.1      | 3.7     | 0.478873239 | 0.4282   | 1.852  |
| 92814_at   | 0.8    | 1.7    | 1.3    | 3.1    | 1.9     | 1.3    | 0.9    | 2.3    | 0.838781503 | 1.725    | 1.6      | 0.125   | 1.078125    | 0.9375   | -1.029 |
| 92816_r_at | 1261.7 | 889    | 1134.7 | 1334.1 | 1173.2  | 1114.1 | 1356.3 | 525.8  | 0.607781532 | 1154.875 | 1042.35  | 112.525 | 1.107953183 | 0.54     | -1.162 |
| 92817_at   | 3770.5 | 3109.3 | 3548.1 | 3027.1 | 3236.6  | 3241.8 | 3267.7 | 3498.3 | 0.794392184 | 3363.75  | 3311.1   | 52.65   | 1.01590106  | 0.8343   | -1.012 |
| 92818_at   | 718.3  | 549.4  | 547.5  | 647.4  | 412.3   | 506    | 523.5  | 536    | 0.057308685 | 615.65   | 494.45   | 121.2   | 1.245120841 | 0.0509   | -1.243 |
| 92820_at   | 92.8   | 194.2  | 154.6  | 113.7  | 180.1   | 182    | 105.9  | 161    | 0.545169373 | 138.825  | 157.25   | 18.425  | 0.882829889 | 0.5195   | 1.152  |
| 92821_at   | 188.7  | 226.1  | 160.4  | 239.2  | 167     | 187.9  | 214.3  | 157.1  | 0.358629841 | 203.6    | 181.575  | 22.025  | 1.121299738 | 0.3738   | -1.116 |
| 92824_at   | 715.7  | 580    | 597.6  | 486.7  | 789.4   | 540.2  | 530.4  | 540.6  | 0.950128236 | 595      | 600.15   | 5.15    | 0.991418812 | 0.9806   | -1.003 |
| 92825_at   | 3.2    | 3.5    | 3.4    | 2.3    | 40.5    | 3.4    | 2.9    | 28.5   | 0.192095739 | 3.1      | 18.825   | 15.725  | 0.164674635 | 0.1369   | 3.333  |
| 92826_at   | 848.1  | 715.4  | 806.9  | 761.5  | 804     | 814.5  | 712.2  | 787.4  | 0.928507239 | 782.975  | 779.525  | 3.45    | 1.004425772 | 0.9395   | -1.004 |
| 92827_at   | 91.9   | 68.2   | 92     | 92.9   | 43.2    | 83.3   | 58.3   | 34.9   | 0.052877714 | 86.25    | 54.925   | 31.325  | 1.570323168 | 0.05009  | -1.645 |
| 92828_at   | 1245.8 | 1132.9 | 1053.7 | 1302   | 1131.6  | 1290.3 | 1180.3 | 1426.2 | 0.426148312 | 1183.6   | 1257.1   | 73.5    | 0.941532098 | 0.4266   | -1.061 |
| 92829_at   | 4575.3 | 3839.2 | 3745.3 | 4444.9 | 4927.5  | 3879.9 | 4149.2 | 4047.3 | 0.760737625 | 4151.175 | 4250.975 | 99.8    | 0.976523033 | 0.76     | -1.024 |
| 92830_s_at | 143.5  | 222.5  | 177.9  | 238.8  | 136.5   | 191.2  | 194.2  | 214.4  | 0.686817071 | 195.675  | 184.075  | 11.6    | 1.063017792 | 0.7272   | -1.057 |
| 92831_at   | 758.1  | 723    | 634.5  | 562.4  | 776.7   | 728.9  | 959.7  | 695.2  | 0.156493065 | 669.5    | 790.125  | 120.625 | 0.847334283 | 0.144    | 1.179  |
| 92832_at   | 214.3  | 281    | 235.2  | 250.1  | 296.8   | 279.9  | 280.7  | 290.4  | 0.053663145 | 245.15   | 286.95   | 41.8    | 0.854330023 | 0.03255  | 1.176  |
| 92833_at   | 27.2   | 15     | 12.2   | 10.1   | 19.6    | 34.6   | 4.8    | 54.1   | 0.342847592 | 16.125   | 28.275   | 12.15   | 0.570291777 | 0.6021   | 1.368  |
| 92834_at   | 2454   | 2736.2 | 2527.3 | 2689.4 | 3269.5  | 1954.7 | 2528.2 | 2252.1 | 0.748915396 | 2601.725 | 2501.125 | 100.6   | 1.0402219   | 0.6306   | -1.058 |
| 92835_at   | 215.7  | 180.6  | 166.7  | 181.1  | 195.4   | 232.8  | 205.1  | 256.5  | 0.083872616 | 186.025  | 222.45   | 36.425  | 0.836255338 | 0.07398  | 1.195  |
| 92836_at   | 4087.2 | 5605.5 | 5614.7 | 4270.4 | 4813.7  | 7591.7 | 6848   | 5402.8 | 0.155074691 | 4894.45  | 6164.05  | 1269.6  | 0.794031521 | 0.1473   | 1.253  |
| 92837_f_at | 7.5    | 7.9    | 5.7    | 10.4   | 6.3     | 14.7   | 2.6    | 5.5    | 0.839818681 | 7.875    | 7.275    | 0.6     | 1.082474227 | 0.5471   | -1.269 |
| 92838_at   | 1291.3 | 1612.5 | 1687.7 | 1329.6 | 1111    | 1825.4 | 1367.8 | 1327.1 | 0.703557522 | 1480.275 | 1407.825 | 72.45   | 1.051462362 | 0.6448   | -1.061 |
| 92839_f_at | 157.3  | 115.7  | 111.1  | 67.3   | 61.3    | 116.4  | 107.1  | 90.7   | 0.426779611 | 112.85   | 93.875   | 18.975  | 1.202130493 | 0.4829   | -1.184 |
| 92840_at   | 727    | 517.5  | 1015.2 | 863.9  | 892.9   | 578.8  | 1035.6 | 518.7  | 0.886008435 | 780.9    | 756.5    | 24.4    | 1.0322538   | 0.851    | -1.044 |
| 92841_f_at | 34.5   | 27.6   | 31.6   | 28.8   | 7.7     | 45.5   | 44.7   | 47.4   | 0.595535472 | 30.625   | 36.325   | 5.7     | 0.843083276 | 0.9348   | -1.039 |
| 92842_r_at | 12.6   | 8.4    | 9.3    | 8      | 2.1     | 8.6    | 3.8    | 3.4    | 0.030530922 | 9.575    | 4.475    | 5.1     | 2.139664804 | 0.02943  | -2.416 |



|            |        |        |        |        |        |        |        |        |             |          |          |         |             |          |        |
|------------|--------|--------|--------|--------|--------|--------|--------|--------|-------------|----------|----------|---------|-------------|----------|--------|
| 92843_r_at | 22.8   | 22.8   | 55.7   | 27.2   | 99.8   | 40.3   | 30.5   | 35.3   | 0.339836738 | 32.125   | 51.475   | 19.35   | 0.624089364 | 0.2576   | 1.533  |
| 92845_at   | 1160.9 | 1110.2 | 1130.6 | 1170.9 | 903    | 951    | 1032.2 | 988    | 0.003430622 | 1143.15  | 968.55   | 174.6   | 1.180269475 | 0.00168  | -1.181 |
| 92846_at   | 10.9   | 21.7   | 6.9    | 9.7    | 41.2   | 19.7   | 8.4    | 6.1    | 0.491600801 | 12.3     | 18.85    | 6.55    | 0.652519894 | 0.6433   | 1.272  |
| 92847_s_at | 495.8  | 485    | 554.4  | 580    | 537    | 526.9  | 502.2  | 470.9  | 0.503935585 | 528.8    | 509.25   | 19.55   | 1.038389789 | 0.5133   | -1.037 |
| 92848_at   | 2252   | 1672.4 | 2203.1 | 1955.3 | 1522   | 1677.9 | 1660.9 | 1500.3 | 0.041704345 | 2020.7   | 1590.275 | 430.425 | 1.270660735 | 0.01967  | -1.264 |
| 92849_at   | 43.7   | 47.6   | 31.8   | 50.7   | 88.3   | 68.8   | 63.5   | 20     | 0.335971775 | 43.45    | 60.15    | 16.7    | 0.722360765 | 0.5695   | 1.232  |
| 92850_at   | 1392.5 | 1750.7 | 1373.1 | 1356.2 | 1343.2 | 1498.6 | 1615.4 | 1548.9 | 0.775332243 | 1468.125 | 1501.525 | 33.4    | 0.977755948 | 0.7328   | -1.026 |
| 92851_at   | 159.6  | 102.4  | 132.1  | 161.6  | 78     | 115.2  | 139.2  | 82.4   | 0.129689191 | 138.925  | 103.7    | 35.225  | 1.339681774 | 0.1307   | -1.357 |
| 92852_at   | 881    | 1125.9 | 1037.9 | 957.1  | 801.3  | 904.6  | 928.2  | 754.1  | 0.064428796 | 1000.475 | 847.05   | 153.425 | 1.181128623 | 0.0613   | -1.181 |
| 92853_at   | 12.2   | 23.2   | 31.2   | 5.9    | 2.6    | 22.2   | 30.4   | 24.9   | 0.825991901 | 18.125   | 20.025   | 1.9     | 0.905118602 | 0.9485   | -1.047 |
| 92854_at   | 2769.3 | 3172.3 | 3076.7 | 2949.4 | 2797.9 | 2857.3 | 2791.5 | 2513.2 | 0.074099174 | 2991.925 | 2739.975 | 251.95  | 1.091953394 | 0.07688  | -1.092 |
| 92855_at   | 1362.4 | 2492.6 | 1871.6 | 1546.5 | 2463.1 | 1899.9 | 2061.8 | 1654.1 | 0.53105918  | 1818.275 | 2019.725 | 201.45  | 0.900258699 | 0.4654   | -1.129 |
| 92856_at   | 58.4   | 91.4   | 192.8  | 152.4  | 141.9  | 174.8  | 159.6  | 170.6  | 0.299938534 | 123.75   | 161.725  | 37.975  | 0.765187819 | 0.227    | 1.44   |
| 92857_at   | 1592.8 | 1017.4 | 1522.8 | 1054.5 | 1095.5 | 1293.9 | 1275.2 | 1260.4 | 0.702265357 | 1296.875 | 1231.25  | 65.625  | 1.053299492 | 0.7983   | -1.034 |
| 92858_at   | 146.3  | 99.4   | 166.1  | 159.6  | 134    | 113.4  | 150.4  | 169.7  | 0.961303583 | 142.85   | 141.875  | 0.975   | 1.006872247 | 0.9918   | -1.002 |
| 92860_at   | 6.6    | 13.2   | 21     | 8.1    | 44.7   | 19.9   | 32.7   | 39.7   | 0.017588806 | 12.225   | 34.25    | 22.025  | 0.356934307 | 0.01368  | 2.977  |
| 92861_i_at | 23.1   | 35.5   | 47.8   | 29.7   | 31.4   | 15.5   | 15.7   | 5.5    | 0.063761447 | 34.025   | 17.025   | 17      | 1.998531571 | 0.07679  | -2.292 |
| 92862_f_at | 24.5   | 18.7   | 24.6   | 14     | 21.6   | 22.5   | 23.4   | 19.5   | 0.656247053 | 20.45    | 21.75    | 1.3     | 0.940229885 | 0.5642   | -1.09  |
| 92863_at   | 762.1  | 1168.6 | 897.6  | 1020.5 | 1277.8 | 1018.5 | 1162.7 | 1087.1 | 0.150005492 | 962.2    | 1136.525 | 174.325 | 0.846615781 | 0.1405   | 1.192  |
| 92864_at   | 60.8   | 39.2   | 35.5   | 78.9   | 38.1   | 72.8   | 62.8   | 82.1   | 0.483459416 | 53.6     | 63.95    | 10.35   | 0.838154808 | 0.4775   | 1.211  |
| 92865_at   | 49.5   | 15     | 36.8   | 15.5   | 56.4   | 12.2   | 8.9    | 18.3   | 0.71891166  | 29.2     | 23.95    | 5.25    | 1.219206681 | 0.5357   | -1.393 |
| 92866_at   | 86.2   | 66.1   | 83.8   | 25.4   | 270.1  | 288.4  | 294.1  | 275.9  | 0.000159677 | 65.375   | 282.125  | 216.75  | 0.231723527 | 0.001615 | 4.776  |
| 92867_at   | 155.2  | 391    | 219.4  | 244.9  | 282.8  | 218.4  | 240.3  | 217.2  | 0.817491145 | 252.625  | 239.675  | 12.95   | 1.054031501 | 0.9888   | -1.003 |
| 92868_at   | 84.1   | 101.9  | 81.4   | 90.9   | 154.4  | 95     | 88.7   | 106.8  | 0.244662159 | 89.575   | 111.225  | 21.65   | 0.805349517 | 0.1915   | 1.217  |
| 92869_at   | 20.7   | 19.1   | 36.9   | 11.4   | 11.2   | 29.5   | 6.6    | 2.6    | 0.278075491 | 22.025   | 12.475   | 9.55    | 1.765531062 | 0.1822   | -2.338 |
| 92870_at   | 438.5  | 504.8  | 428.4  | 590.5  | 464.5  | 443    | 479.6  | 455.8  | 0.48738199  | 490.55   | 460.725  | 29.825  | 1.064734929 | 0.4983   | -1.056 |
| 92871_at   | 224.9  | 215.9  | 194.3  | 267.1  | 246    | 233.1  | 264.1  | 251.9  | 0.233038791 | 225.55   | 248.775  | 23.225  | 0.906642548 | 0.1955   | -1.109 |
| 92872_at   | 586.2  | 703.2  | 640.8  | 757    | 553.9  | 627.7  | 578.9  | 809.5  | 0.686837425 | 671.8    | 642.5    | 29.3    | 1.045603113 | 0.6314   | -1.053 |
| 92873_f_at | 10.4   | 6.6    | 10.3   | 2.4    | 40.1   | 8.6    | 10.5   | 24.1   | 0.162432776 | 7.425    | 20.825   | 13.4    | 0.356542617 | 0.09438  | 2.683  |
| 92874_f_at | 1055   | 975    | 943.9  | 944.1  | 1268.1 | 907.4  | 1060.2 | 1028.5 | 0.341246964 | 979.5    | 1066.05  | 86.55   | 0.918812438 | 0.3289   | -1.082 |
| 92875_s_at | 379.6  | 372    | 374.9  | 427.6  | 401.5  | 411.8  | 379.6  | 379.2  | 0.782388814 | 388.525  | 393.025  | 4.5     | 0.988550347 | 0.7602   | -1.012 |
| 92876_at   | 115    | 73.1   | 109.4  | 106.3  | 56     | 108.6  | 90.9   | 105.5  | 0.512431815 | 100.95   | 90.25    | 10.7    | 1.118559557 | 0.5123   | -1.138 |
| 92877_at   | 413.1  | 381    | 256.9  | 334.9  | 405.9  | 424.7  | 251    | 512.7  | 0.453215271 | 346.475  | 398.575  | 52.1    | 0.869284325 | 0.5279   | -1.131 |
| 92878_at   | 239    | 164.3  | 228.5  | 163.9  | 234    | 241.1  | 258.1  | 255.4  | 0.093341162 | 198.925  | 247.15   | 48.225  | 0.804875582 | 0.06965  | 1.261  |
| 92879_at   | 864.6  | 959.7  | 891    | 722.8  | 617.6  | 917    | 928.8  | 917.9  | 0.881669011 | 859.525  | 845.325  | 14.2    | 1.016798273 | 0.835    | -1.026 |
| 92880_at   | 3681.7 | 3954.6 | 3442.2 | 3320.1 | 4710   | 4363.4 | 4302.5 | 5378.1 | 0.013388692 | 3599.65  | 4688.5   | 1088.85 | 0.767761544 | 0.006361 | 1.3    |
| 92881_at   | 133.2  | 88.8   | 130    | 124.6  | 111.2  | 83.4   | 111.7  | 150.4  | 0.782601902 | 119.15   | 114.175  | 4.975   | 1.043573462 | 0.7468   | -1.053 |
| 92882_at   | 1013.4 | 989.5  | 816.4  | 915.4  | 728.5  | 1185.3 | 763.1  | 880.8  | 0.714887477 | 933.675  | 889.425  | 44.25   | 1.049751244 | 0.6136   | -1.066 |
| 92883_at   | 3.6    | 17.8   | 7.6    | 37.1   | 39.5   | 11.8   | 14.5   | 34.6   | 0.43462804  | 16.525   | 25.1     | 8.575   | 0.658366534 | 0.3213   | 1.893  |
| 92884_at   | 1907.9 | 4590   | 2908.8 | 3329   | 3323   | 2881.7 | 3361.9 | 3364.1 | 0.936562602 | 3183.925 | 3232.675 | 48.75   | 0.98491961  | 0.7533   | -1.063 |
| 92885_at   | 46.8   | 7.7    | 36.5   | 51.5   | 15.8   | 37.3   | 30.5   | 38     | 0.659336638 | 35.625   | 30.4     | 5.225   | 1.171875    | 0.9982   | -1.001 |
| 92887_at   | 2302.4 | 2622.3 | 2599.2 | 2051.5 | 2653   | 2928.2 | 2863.2 | 2271.3 | 0.20547369  | 2393.85  | 2678.925 | 285.075 | 0.893586047 | 0.2167   | -1.119 |
| 92888_s_at | 462.9  | 558.9  | 380.5  | 396.3  | 440.2  | 486.1  | 551.2  | 392.1  | 0.748775534 | 449.65   | 467.4    | 17.75   | 0.962023962 | 0.7206   | -1.043 |
| 92889_r_at | 5.2    | 3.2    | 9.1    | 14.9   | 9.9    | 6.3    | 17.6   | 5.2    | 0.679959316 | 8.1      | 9.75     | 1.65    | 0.830769231 | 0.6083   | 1.261  |
| 92890_at   | 8      | 8.1    | 10.5   | 19.1   | 3.2    | 32.3   | 8.6    | 5.9    | 0.888514475 | 11.425   | 12.5     | 1.075   | 0.914       | 0.6823   | -1.256 |
| 92891_f_at | 63     | 88.6   | 68.7   | 74.8   | 92.7   | 84.8   | 72.8   | 110.6  | 0.145137606 | 73.775   | 90.225   | 16.45   | 0.817678027 | 0.1314   | 1.22   |
| 92892_at   | 39.2   | 54.2   | 26.7   | 41.3   | 20.1   | 55.6   | 51.2   | 27.3   | 0.869230021 | 40.35    | 38.55    | 1.8     | 1.046692607 | 0.736    | -1.106 |
| 92893_at   | 137.7  | 169.9  | 126    | 168.4  | 204.8  | 189.4  | 191.7  | 168    | 0.034044559 | 150.5    | 188.475  | 37.975  | 0.798514392 | 0.03509  | 1.259  |
| 92894_s_at | 30.1   | 34.8   | 32.7   | 31.1   | 37.6   | 47.3   | 24     | 14.6   | 0.869624811 | 32.175   | 30.875   | 1.3     | 1.042105263 | 0.6257   | -1.144 |
| 92895_at   | 23.9   | 17.5   | 26.4   | 26.8   | 27.2   | 29.2   | 25.9   | 10.2   | 0.918780978 | 23.65    | 23.125   | 0.525   | 1.022702703 | 0.7633   | -1.088 |
| 92896_s_at | 5.2    | 4.3    | 15.1   | 2.9    | 6.7    | 4.1    | 7.2    | 5.3    | 0.736133153 | 6.875    | 5.825    | 1.05    | 1.180257511 | 0.9708   | -1.014 |
| 92897_at   | 1.4    | 1.5    | 3.5    | 15.5   | 4.7    | 8      | 16.3   | 6.6    | 0.451787074 | 5.475    | 8.9      | 3.425   | 0.615168539 | 0.1978   | 2.436  |
| 92898_at   | 186.1  | 125.9  | 141.9  | 151.3  | 150.1  | 180.3  | 135.8  | 205    | 0.443046736 | 151.3    | 167.8    | 16.5    | 0.901668653 | 0.4428   | -1.107 |
| 92899_at   | 3.3    | 8.3    | 2.4    | 10.1   | 9.2    | 1.3    | 5.1    | 5.1    | 0.743357715 | 6.025    | 5.175    | 0.85    | 1.164251208 | 0.7458   | -1.199 |
| 92900_at   | 89.5   | 66.6   | 86.5   | 71.4   | 115.6  | 77.8   | 101.6  | 87.5   | 0.143749648 | 78.5     | 95.625   | 17.125  | 0.820915033 | 0.1355   | 1.214  |
| 92901_at   | 192.4  | 333.8  | 254.7  | 380.2  | 138.4  | 228.4  | 143.2  | 142.6  | 0.047233043 | 290.275  | 163.15   | 127.125 | 1.779190929 | 0.02618  | -1.762 |



|            |        |        |        |        |        |       |        |        |             |          |          |         |             |           |        |
|------------|--------|--------|--------|--------|--------|-------|--------|--------|-------------|----------|----------|---------|-------------|-----------|--------|
| 92902_at   | 36.8   | 24.1   | 30.5   | 34.5   | 56.5   | 30.2  | 14.8   | 32.4   | 0.837062505 | 31.475   | 33.475   | 2       | 0.940253921 | 0.9132    | -1.034 |
| 92903_at   | 25.3   | 12.4   | 25.1   | 41.4   | 20.4   | 16.4  | 15.3   | 18.1   | 0.248619583 | 26.05    | 17.55    | 8.5     | 1.484330484 | 0.2623    | -1.372 |
| 92904_at   | 43.6   | 42.3   | 41.8   | 55.7   | 83.8   | 55.1  | 80     | 58.1   | 0.04221279  | 45.85    | 69.25    | 23.4    | 0.662093863 | 0.01968   | 1.494  |
| 92905_at   | 11.1   | 7.9    | 6.6    | 18.4   | 2.6    | 13.7  | 15.7   | 6.3    | 0.737767038 | 11       | 9.575    | 1.425   | 1.148825065 | 0.5743    | -1.326 |
| 92906_at   | 35.2   | 6      | 5.1    | 23.6   | 11.6   | 37.2  | 18.6   | 20.9   | 0.631795617 | 17.475   | 22.075   | 4.6     | 0.791619479 | 0.4155    | 1.606  |
| 92907_at   | 226.4  | 188    | 191.7  | 245.6  | 9      | 29.6  | 11.3   | 29.3   | 0.000227164 | 212.925  | 19.8     | 193.125 | 10.75378788 | 0.000224  | -12.27 |
| 92908_at   | 209.2  | 296.9  | 261.9  | 237.5  | 190.4  | 221.5 | 213.8  | 266    | 0.289237072 | 251.375  | 222.925  | 28.45   | 1.127621397 | 0.2851    | -1.127 |
| 92909_at   | 161.5  | 128.9  | 88.8   | 115    | 84.5   | 137.7 | 120.5  | 129.7  | 0.786148598 | 123.55   | 118.1    | 5.45    | 1.046147333 | 0.8207    | -1.04  |
| 92910_at   | 66.3   | 81.1   | 32.8   | 59.9   | 42.1   | 65.7  | 22.7   | 26.9   | 0.190824453 | 60.025   | 39.35    | 20.675  | 1.525412961 | 0.1865    | -1.583 |
| 92911_at   | 7.2    | 9.7    | 13.6   | 5.2    | 35.6   | 4.7   | 6.5    | 4      | 0.660899517 | 8.925    | 12.7     | 3.775   | 0.702755906 | 0.9499    | -1.036 |
| 92912_at   | 92.1   | 83     | 136.4  | 84.1   | 173.8  | 87.8  | 98.9   | 126.4  | 0.364276274 | 98.9     | 121.725  | 22.825  | 0.812487164 | 0.3484    | 1.214  |
| 92913_at   | 81.7   | 60.6   | 70.6   | 43.1   | 50.9   | 67.7  | 52.5   | 101.9  | 0.77896775  | 64       | 68.25    | 4.25    | 0.937728938 | 0.8173    | -1.052 |
| 92914_at   | 121.6  | 128.3  | 88.4   | 191.3  | 165    | 179.3 | 162    | 207.8  | 0.120084831 | 132.4    | 178.525  | 46.125  | 0.741632825 | 0.09576   | 1.394  |
| 92915_s_at | 166.9  | 125.7  | 166.3  | 199.7  | 196.1  | 191.6 | 200.2  | 196    | 0.129837845 | 164.65   | 195.975  | 31.325  | 0.840158183 | 0.09893   | 1.206  |
| 92916_at   | 219.7  | 208.7  | 339.6  | 202.8  | 326.9  | 270.1 | 269.9  | 429.8  | 0.153667927 | 242.7    | 324.175  | 81.475  | 0.7486697   | 0.122     | 1.342  |
| 92917_at   | 7.7    | 16.5   | 9.6    | 10.2   | 8.9    | 3.6   | 5.9    | 11.8   | 0.235108026 | 11       | 7.55     | 3.45    | 1.456953642 | 0.2031    | -1.545 |
| 92918_at   | 57.6   | 49.4   | 44.9   | 66.1   | 62.9   | 72    | 40.9   | 72.2   | 0.428422513 | 54.5     | 62       | 7.5     | 0.879032258 | 0.4972    | 1.122  |
| 92919_at   | 83.9   | 54.1   | 65     | 107.1  | 94.4   | 79.5  | 97.2   | 109.3  | 0.243949518 | 77.525   | 95.1     | 17.575  | 0.815194532 | 0.2062    | 1.26   |
| 92920_at   | 107    | 57.5   | 109.7  | 51.8   | 117.7  | 96.1  | 95.6   | 34.8   | 0.854029147 | 81.5     | 86.05    | 4.55    | 0.947123765 | 0.9575    | -1.019 |
| 92921_at   | 33.2   | 37.1   | 43     | 22.4   | 35.6   | 35.2  | 27.3   | 31     | 0.745587587 | 33.925   | 32.275   | 1.65    | 1.05112316  | 0.8651    | -1.028 |
| 92922_at   | 41.7   | 59.3   | 63     | 84.7   | 59.8   | 52.3  | 49.4   | 89     | 0.972780314 | 62.175   | 62.625   | 0.45    | 0.992814371 | 0.9582    | -1.011 |
| 92923_g_at | 50.1   | 68.3   | 20     | 42.7   | 39.4   | 50.7  | 73.5   | 63.6   | 0.393573991 | 45.275   | 56.8     | 11.525  | 0.79709507  | 0.3617    | 1.337  |
| 92924_at   | 2.2    | 8.1    | 18.3   | 13.1   | 18     | 12.3  | 8.7    | 7.7    | 0.775101813 | 10.425   | 11.675   | 1.25    | 0.892933619 | 0.563     | 1.357  |
| 92925_at   | 357.7  | 792.7  | 479.4  | 618.2  | 970.9  | 669   | 772.2  | 1031.7 | 0.055921589 | 562      | 860.95   | 298.95  | 0.652767292 | 0.06171   | 1.575  |
| 92926_at   | 4.2    | 5.3    | 6.4    | 8.6    | 13     | 13.5  | 9.3    | 7.5    | 0.040647276 | 6.125    | 10.825   | 4.7     | 0.565819861 | 0.03151   | 1.772  |
| 92927_at   | 329.2  | 268.6  | 296.9  | 357.3  | 188.8  | 248.4 | 237.2  | 227.7  | 0.011923036 | 313      | 225.525  | 87.475  | 1.387872741 | 0.009076  | -1.387 |
| 92929_at   | 97.6   | 56     | 103.8  | 143.2  | 47.5   | 85.5  | 94.2   | 79.2   | 0.305966369 | 100.15   | 76.6     | 23.55   | 1.307441253 | 0.3589    | -1.279 |
| 92930_at   | 4.9    | 9.5    | 24.3   | 28     | 10.8   | 8.5   | 20.5   | 18.5   | 0.754285212 | 16.675   | 14.575   | 2.1     | 1.144082333 | 0.9662    | -1.021 |
| 92931_at   | 58.5   | 85.4   | 16.2   | 53     | 24     | 86.3  | 35.2   | 22.9   | 0.60842811  | 53.275   | 42.1     | 11.175  | 1.26543943  | 0.6369    | -1.265 |
| 92932_at   | 1107.3 | 1670.9 | 1320.5 | 1413.2 | 524.8  | 497.8 | 447.8  | 581.5  | 0.003810822 | 1377.975 | 512.975  | 865     | 2.68624202  | 0.0000682 | -2.669 |
| 92933_at   | 172.6  | 205    | 194.9  | 141.1  | 183.4  | 165.2 | 211    | 192.6  | 0.595093695 | 178.4    | 188.05   | 9.65    | 0.948683861 | 0.5669    | -1.061 |
| 92934_at   | 395.6  | 450.6  | 379.7  | 324.2  | 384.3  | 485.5 | 439    | 416.1  | 0.242952522 | 387.525  | 431.225  | 43.7    | 0.898660792 | 0.2365    | 1.116  |
| 92935_at   | 103.8  | 65.7   | 98.8   | 108.7  | 140.2  | 137   | 167.9  | 145.1  | 0.005472249 | 94.25    | 147.55   | 53.3    | 0.63876652  | 0.009763  | 1.59   |
| 92936_at   | 30     | 32.1   | 42.3   | 38     | 53.6   | 40.4  | 51.7   | 43.7   | 0.032332094 | 35.6     | 47.35    | 11.75   | 0.751847941 | 0.03174   | 1.333  |
| 92937_at   | 11.5   | 20.2   | 13.6   | 11.1   | 9.1    | 15.5  | 14.6   | 19.3   | 0.865829938 | 14.1     | 14.625   | 0.525   | 0.964102564 | 0.8838    | -1.033 |
| 92938_at   | 49     | 40.5   | 37.7   | 32.8   | 26     | 93.3  | 51.6   | 55.9   | 0.318474777 | 40       | 56.7     | 16.7    | 0.705467372 | 0.3772    | 1.3    |
| 92939_at   | 25.3   | 58.1   | 6.1    | 5      | 44.7   | 9     | 10.6   | 5.6    | 0.704671452 | 23.625   | 17.475   | 6.15    | 1.35193133  | 0.8426    | -1.165 |
| 92940_s_at | 34.7   | 10.2   | 22.8   | 48.3   | 11.8   | 48.2  | 32.3   | 45.4   | 0.657380094 | 29       | 34.425   | 5.425   | 0.842411038 | 0.6965    | 1.211  |
| 92941_at   | 9.3    | 35     | 17.6   | 36.9   | 11.8   | 38.2  | 14.7   | 7.4    | 0.514042394 | 24.7     | 18.025   | 6.675   | 1.370319001 | 0.468     | -1.444 |
| 92942_at   | 479.2  | 343.8  | 553.1  | 437.6  | 408.8  | 520.6 | 472.5  | 450.3  | 0.854085918 | 453.425  | 463.05   | 9.625   | 0.979213908 | 0.786     | -1.032 |
| 92943_at   | 7      | 12.2   | 11.6   | 14.9   | 22.3   | 33.8  | 8.9    | 79.9   | 0.206101181 | 11.425   | 36.225   | 24.8    | 0.315389924 | 0.1132    | 2.457  |
| 92944_at   | 49.5   | 22.8   | 21     | 17.8   | 20.9   | 64.8  | 61.7   | 13.1   | 0.459546521 | 27.775   | 40.125   | 12.35   | 0.692211838 | 0.6204    | 1.271  |
| 92945_at   | 8.5    | 10.3   | 8.9    | 1      | 3.2    | 4.7   | 1.9    | 19.6   | 0.971451444 | 7.175    | 7.35     | 0.175   | 0.976190476 | 0.9245    | -1.077 |
| 92946_f_at | 4.4    | 3.8    | 5.2    | 5.3    | 5      | 6.5   | 6.5    | 4.3    | 0.227673519 | 4.675    | 5.575    | 0.9     | 0.838565022 | 0.241     | 1.182  |
| 92947_s_at | 45.2   | 37.2   | 36     | 40     | 42.9   | 56.5  | 74.3   | 68.9   | 0.052178642 | 39.6     | 60.65    | 21.05   | 0.652926628 | 0.02173   | 1.504  |
| 92948_at   | 7.2    | 8.4    | 9      | 7.9    | 3.1    | 7     | 8.7    | 3.7    | 0.156895408 | 8.125    | 5.625    | 2.5     | 1.444444444 | 0.1211    | -1.579 |
| 92949_at   | 104.1  | 126    | 151.7  | 177.3  | 123.3  | 162.8 | 254.9  | 213.1  | 0.20180548  | 139.775  | 188.525  | 48.75   | 0.741413606 | 0.2005    | 1.326  |
| 92950_at   | 59.6   | 18.6   | 135.9  | 61.6   | 62.3   | 57.6  | 114.8  | 94.5   | 0.653714793 | 68.925   | 82.3     | 13.375  | 0.837484812 | 0.4483    | 1.43   |
| 92951_at   | 42     | 59.9   | 14.9   | 12.1   | 17.9   | 43.6  | 34.2   | 94.3   | 0.478463527 | 32.225   | 47.5     | 15.275  | 0.678421053 | 0.4422    | 1.533  |
| 92952_f_at | 31.4   | 15.8   | 31.3   | 40.1   | 37.2   | 47.3  | 32.4   | 76.6   | 0.160112456 | 29.65    | 48.375   | 18.725  | 0.612919897 | 0.1274    | 1.628  |
| 92953_at   | 30.1   | 23.3   | 20.7   | 30.4   | 25     | 25.9  | 26.8   | 49.2   | 0.42585113  | 26.125   | 31.725   | 5.6     | 0.823483058 | 0.4111    | 1.18   |
| 92955_at   | 41.5   | 91.3   | 52.4   | 95.1   | 69.3   | 119.4 | 106.8  | 127.7  | 0.10500327  | 70.075   | 105.8    | 35.725  | 0.662334594 | 0.1209    | 1.563  |
| 92956_at   | 146.6  | 212.5  | 239.4  | 256.5  | 296.3  | 255.4 | 238.8  | 306.1  | 0.089497897 | 213.75   | 274.15   | 60.4    | 0.779682655 | 0.1027    | 1.304  |
| 92957_at   | 8.2    | 11     | 18.8   | 33.6   | 18.1   | 11.1  | 35.2   | 18.1   | 0.734475856 | 17.9     | 20.625   | 2.725   | 0.867878788 | 0.6235    | 1.225  |
| 92958_at   | 869.9  | 1266.6 | 1138   | 956.4  | 1258.8 | 1054  | 1338.2 | 1155.7 | 0.238772621 | 1057.725 | 1201.675 | 143.95  | 0.880208875 | 0.2248    | 1.144  |
| 92959_at   | 95.3   | 70.4   | 93.9   | 76.6   | 87.8   | 90.7  | 55.1   | 64.5   | 0.412256642 | 84.05    | 74.525   | 9.525   | 1.12780946  | 0.3844    | -1.143 |



|            |         |         |         |         |         |        |         |         |             |          |          |         |             |          |        |
|------------|---------|---------|---------|---------|---------|--------|---------|---------|-------------|----------|----------|---------|-------------|----------|--------|
| 92960_at   | 13.6    | 15      | 10.2    | 5.8     | 15.3    | 9.5    | 7.6     | 8.4     | 0.736366891 | 11.15    | 10.2     | 0.95    | 1.093137255 | 0.8051   | -1.071 |
| 92961_at   | 68.1    | 147.4   | 100.2   | 174.9   | 29.1    | 68.6   | 47      | 68.8    | 0.055151154 | 122.65   | 53.375   | 69.275  | 2.297892272 | 0.03028  | -2.284 |
| 92962_at   | 88.8    | 72.2    | 82.6    | 78.6    | 117.7   | 65     | 48.5    | 53.8    | 0.603683267 | 80.55    | 71.25    | 9.3     | 1.130526316 | 0.3993   | -1.202 |
| 92963_at   | 331.9   | 406.3   | 415.7   | 437.3   | 458.3   | 462    | 486     | 316.4   | 0.497408699 | 397.8    | 430.675  | 32.875  | 0.923666338 | 0.5633   | -1.074 |
| 92965_at   | 101.8   | 24.7    | 83.6    | 112.9   | 48.8    | 110.2  | 29      | 32.9    | 0.38426467  | 80.75    | 55.225   | 25.525  | 1.462200091 | 0.4406   | -1.466 |
| 92966_g_at | 10.8    | 9.1     | 8.9     | 13      | 9.2     | 12.4   | 9.4     | 15.4    | 0.538142658 | 10.45    | 11.6     | 1.15    | 0.900862069 | 0.5787   | -1.093 |
| 92967_r_at | 170     | 119.9   | 214.1   | 202.7   | 126.3   | 199.1  | 233.2   | 189.7   | 0.746456471 | 176.675  | 187.075  | 10.4    | 0.944407323 | 0.7673   | -1.059 |
| 92968_at   | 1535.9  | 1608.3  | 1807.3  | 1832.1  | 1860.2  | 1525   | 1663.4  | 1940.1  | 0.683077259 | 1695.9   | 1747.175 | 51.275  | 0.970652625 | 0.7003   | -1.029 |
| 92969_at   | 295.8   | 426.9   | 375.9   | 584.8   | 351.1   | 566.5  | 526     | 607     | 0.3112877   | 420.85   | 512.65   | 91.8    | 0.820930459 | 0.3123   | 1.23   |
| 92970_at   | 16.2    | 18.2    | 8.6     | 11.7    | 32.9    | 12.8   | 15.1    | 12.6    | 0.429451982 | 13.675   | 18.35    | 4.675   | 0.745231608 | 0.416    | 1.281  |
| 92971_at   | 222     | 206.8   | 216.4   | 216.7   | 153.3   | 214.1  | 242.9   | 247.2   | 0.962932575 | 215.475  | 214.375  | 1.1     | 1.005131195 | 0.8506   | -1.022 |
| 92972_at   | 17.5    | 15      | 17.8    | 20.5    | 19      | 18     | 17      | 23      | 0.405673554 | 17.7     | 19.25    | 1.55    | 0.919480519 | 0.4023   | -1.086 |
| 92974_at   | 168.7   | 131.6   | 115.5   | 136.9   | 106.1   | 148.9  | 100.8   | 128.3   | 0.316187663 | 138.175  | 121.025  | 17.15   | 1.141706259 | 0.2997   | -1.145 |
| 92975_at   | 118.3   | 124.1   | 92      | 124     | 82.9    | 144.1  | 90.1    | 102.3   | 0.562860767 | 114.6    | 104.85   | 9.75    | 1.092989986 | 0.485    | -1.111 |
| 92976_at   | 335.7   | 310     | 476.5   | 407.4   | 369.6   | 413    | 360     | 379.3   | 0.963520538 | 382.4    | 380.475  | 1.925   | 1.005059465 | 0.9412   | -1.008 |
| 92977_s_at | 17.7    | 32.3    | 33.7    | 19.9    | 43.8    | 33.4   | 35.3    | 36.8    | 0.063585882 | 25.9     | 37.325   | 11.425  | 0.693904889 | 0.06187  | 1.493  |
| 92978_s_at | 20.2    | 22.5    | 45.5    | 34.8    | 26      | 31.2   | 31.6    | 37.4    | 0.905411815 | 30.75    | 31.55    | 0.8     | 0.974643423 | 0.7336   | -1.075 |
| 92979_at   | 121.3   | 164.5   | 194     | 163.1   | 105.1   | 135.6  | 154     | 93.9    | 0.107023429 | 160.725  | 122.15   | 38.575  | 1.315800246 | 0.1105   | -1.323 |
| 92980_at   | 16.5    | 62.7    | 18.7    | 17.4    | 30.1    | 27.3   | 38.8    | 24.5    | 0.914661328 | 28.825   | 30.175   | 1.35    | 0.955260978 | 0.5503   | 1.236  |
| 92981_at   | 14.1    | 24.6    | 3.1     | 6.1     | 14.9    | 15.8   | 21      | 14.8    | 0.413331459 | 11.975   | 16.625   | 4.65    | 0.720300752 | 0.2399   | 1.836  |
| 92982_at   | 27      | 33.2    | 63.1    | 48.5    | 47.3    | 61.8   | 65.6    | 47.7    | 0.237146528 | 42.95    | 55.6     | 12.65   | 0.772482014 | 0.1979   | 1.352  |
| 92983_at   | 21.4    | 5.3     | 55.9    | 39.9    | 14      | 23.8   | 22.6    | 51.8    | 0.857847058 | 30.625   | 28.05    | 2.575   | 1.091800357 | 0.8568   | 1.117  |
| 92984_g_at | 17      | 26      | 37      | 31.3    | 25.2    | 43.2   | 21.8    | 13.7    | 0.815399231 | 27.825   | 25.975   | 1.85    | 1.071222329 | 0.7099   | -1.119 |
| 92985_at   | 39.4    | 17.8    | 53.3    | 23.8    | 15.2    | 75.7   | 20.9    | 28.1    | 0.933699376 | 33.575   | 34.975   | 1.4     | 0.959971408 | 0.878    | -1.071 |
| 92986_g_at | 102.4   | 99.3    | 125.2   | 137.6   | 129.9   | 109.1  | 146.6   | 120.6   | 0.424100377 | 116.125  | 126.55   | 10.425  | 0.917621493 | 0.4081   | -1.093 |
| 92987_at   | 255.6   | 477.1   | 423.8   | 391.8   | 366.1   | 467.5  | 514.3   | 526.9   | 0.223443773 | 387.075  | 468.7    | 81.625  | 0.82584809  | 0.2411   | 1.23   |
| 92988_i_at | 52.7    | 53.4    | 58.8    | 64.4    | 70      | 74.3   | 108.6   | 87.4    | 0.04375444  | 57.325   | 85.075   | 27.75   | 0.67381722  | 0.01251  | 1.467  |
| 92989_f_at | 153.6   | 169.2   | 148.1   | 204.5   | 219.3   | 250.8  | 278.2   | 293.7   | 0.005113396 | 168.85   | 260.5    | 91.65   | 0.648176583 | 0.00409  | 1.546  |
| 92990_at   | 139.6   | 113.5   | 128.7   | 143.3   | 118.8   | 100.8  | 70.1    | 143.1   | 0.239192277 | 131.275  | 108.2    | 23.075  | 1.213262477 | 0.215    | -1.249 |
| 92991_at   | 86.8    | 68.9    | 60.3    | 73.3    | 42.4    | 72.2   | 51.5    | 47.7    | 0.070584022 | 72.325   | 53.45    | 18.875  | 1.35313377  | 0.06203  | -1.369 |
| 92992_i_at | 44.7    | 29.7    | 32      | 25.3    | 26.1    | 42.3   | 34.5    | 31      | 0.922048717 | 32.925   | 33.475   | 0.55    | 0.983569828 | 0.8922   | -1.022 |
| 92993_r_at | 57.1    | 43      | 60.4    | 56.4    | 41.4    | 65     | 37.1    | 46.4    | 0.394008712 | 54.225   | 47.475   | 6.75    | 1.142180095 | 0.343    | -1.159 |
| 92994_at   | 10.1    | 7.6     | 7.7     | 4.7     | 8       | 6.5    | 6.2     | 10.3    | 0.881784051 | 7.525    | 7.75     | 0.225   | 0.970967742 | 0.8284   | -1.046 |
| 92995_at   | 76.2    | 61.9    | 73.1    | 52.2    | 51.8    | 59.7   | 28.6    | 94.7    | 0.653661453 | 65.85    | 58.7     | 7.15    | 1.121805792 | 0.493    | -1.21  |
| 92996_at   | 111.7   | 171.5   | 199     | 173     | 200     | 218.8  | 203.4   | 229.4   | 0.070501463 | 163.8    | 212.9    | 49.1    | 0.769375294 | 0.0711   | 1.327  |
| 92997_g_at | 17.8    | 28.7    | 64      | 23.1    | 23.2    | 57.1   | 39.8    | 23.7    | 0.853310418 | 33.4     | 35.95    | 2.55    | 0.92906815  | 0.7299   | 1.136  |
| 92998_at   | 78      | 130.1   | 97.9    | 130.3   | 67.4    | 153.3  | 88.6    | 121.8   | 0.956663335 | 109.075  | 107.775  | 1.3     | 1.012062167 | 0.87     | -1.038 |
| 92999_at   | 44.9    | 40      | 67.7    | 13      | 61.6    | 59.1   | 37.4    | 99      | 0.22821204  | 41.4     | 64.275   | 22.875  | 0.644107351 | 0.2342   | 1.708  |
| 93000_g_at | 68.2    | 49.9    | 78.9    | 86.6    | 62.5    | 89.5   | 76.6    | 92.3    | 0.408581587 | 70.9     | 80.225   | 9.325   | 0.883764413 | 0.4091   | 1.142  |
| 93001_at   | 29.9    | 18.5    | 17.2    | 30.5    | 29.5    | 50.9   | 42.9    | 20.7    | 0.183074918 | 24.025   | 36       | 11.975  | 0.667361111 | 0.1812   | 1.464  |
| 93002_r_at | 19.1    | 37.6    | 27.6    | 3.1     | 46.9    | 4.1    | 25.9    | 30.7    | 0.675370349 | 21.85    | 26.9     | 5.05    | 0.812267658 | 0.779    | 1.256  |
| 93004_r_at | 126.1   | 168.6   | 170.1   | 124.6   | 231.5   | 203.5  | 213.6   | 167.9   | 0.021870799 | 147.35   | 204.125  | 56.775  | 0.721861604 | 0.02429  | 1.392  |
| 93005_at   | 76.1    | 54.6    | 89.9    | 59.7    | 48.8    | 91.5   | 54.7    | 60.1    | 0.631844985 | 70.075   | 63.775   | 6.3     | 1.09878479  | 0.578    | -1.11  |
| 93006_at   | 105     | 150.5   | 90      | 120.8   | 99.6    | 119.4  | 78.8    | 99.3    | 0.310325904 | 116.575  | 99.275   | 17.3    | 1.17426341  | 0.3102   | -1.166 |
| 93007_at   | 5.2     | 8.1     | 5.2     | 6.8     | 26.4    | 3.5    | 3.3     | 5.8     | 0.584254678 | 6.325    | 9.75     | 3.425   | 0.648717949 | 0.9344   | -1.044 |
| 93008_at   | 1891.8  | 2402.3  | 1906.9  | 2094.6  | 2326.4  | 1899.7 | 2141.1  | 1790.7  | 0.845472673 | 2073.9   | 2039.475 | 34.425  | 1.016879344 | 0.8386   | -1.017 |
| 93009_at   | 16907.7 | 16733.9 | 17699.9 | 16111.7 | 22567.6 | 15902  | 18990.5 | 17558.1 | 0.276932541 | 16863.3  | 18754.55 | 1891.25 | 0.899157804 | 0.2451   | -1.104 |
| 93010_at   | 731.6   | 612.1   | 722.5   | 534.7   | 1082.5  | 636.9  | 783.6   | 555.8   | 0.41255291  | 650.225  | 764.7    | 114.475 | 0.850300772 | 0.4303   | 1.148  |
| 93011_at   | 971.7   | 953.9   | 1054.9  | 1199.7  | 736.4   | 1122.1 | 939.5   | 1265.4  | 0.829252412 | 1045.05  | 1015.85  | 29.2    | 1.028744401 | 0.7421   | -1.045 |
| 93012_at   | 74.6    | 115.1   | 170.2   | 138.7   | 184     | 119    | 115.1   | 145     | 0.553792265 | 124.65   | 140.775  | 16.125  | 0.885455514 | 0.5018   | 1.159  |
| 93013_at   | 2088    | 2302    | 1923.6  | 1850.2  | 3099.5  | 2891.1 | 3020.4  | 2889    | 0.000694164 | 2040.95  | 2975     | 934.05  | 0.686033613 | 0.000314 | 1.462  |
| 93014_at   | 7745.1  | 6944    | 7457    | 6692    | 10704.5 | 6507.1 | 8076.1  | 6155.2  | 0.579598237 | 7209.525 | 7860.725 | 651.2   | 0.917157769 | 0.6413   | -1.066 |
| 93015_at   | 261.2   | 234.9   | 223.1   | 180.5   | 171.1   | 192.6  | 136.1   | 134.3   | 0.024236331 | 224.925  | 158.525  | 66.4    | 1.418861378 | 0.02405  | -1.423 |
| 93016_at   | 47.4    | 51      | 55.1    | 55      | 35.1    | 51.9   | 53.9    | 82.3    | 0.735122227 | 52.125   | 55.8     | 3.675   | 0.934139785 | 0.8926   | -1.025 |
| 93017_at   | 588.6   | 390.2   | 462.4   | 496.2   | 296.6   | 541.3  | 452.1   | 465.4   | 0.516314666 | 484.35   | 438.85   | 45.5    | 1.103680073 | 0.4991   | -1.118 |
| 93018_at   | 70.7    | 39.3    | 141.3   | 73.5    | 55.4    | 61.5   | 83      | 152.6   | 0.830426508 | 81.2     | 88.125   | 6.925   | 0.92141844  | 0.7813   | 1.106  |



|            |         |         |         |        |         |         |         |         |             |           |          |          |             |          |        |
|------------|---------|---------|---------|--------|---------|---------|---------|---------|-------------|-----------|----------|----------|-------------|----------|--------|
| 93019_at   | 1783.5  | 3515.2  | 2817.7  | 2629.1 | 3327.4  | 2269.5  | 2630.3  | 1833.2  | 0.731577508 | 2686.375  | 2515.1   | 171.275  | 1.068098684 | 0.7583   | -1.063 |
| 93020_at   | 340.3   | 291.3   | 323.1   | 347.8  | 149.2   | 226.1   | 208     | 246.5   | 0.004955778 | 325.625   | 207.45   | 118.175  | 1.569655339 | 0.007213 | -1.593 |
| 93021_at   | 3534.9  | 2731.2  | 3351.4  | 3127   | 1300.4  | 1562.5  | 1743.8  | 1898    | 0.000506293 | 3186.125  | 1626.175 | 1559.95  | 1.959275601 | 0.000475 | -1.97  |
| 93022_i_at | 101.7   | 76.1    | 69.6    | 88.3   | 70.2    | 82.3    | 56.9    | 77.8    | 0.229234343 | 83.925    | 71.8     | 12.125   | 1.168871866 | 0.2324   | -1.168 |
| 93023_f_at | 623     | 494     | 536     | 616.1  | 820.3   | 426.4   | 394     | 401.3   | 0.630708446 | 567.275   | 510.5    | 56.775   | 1.111214496 | 0.4417   | -1.164 |
| 93024_at   | 22      | 15.4    | 22.4    | 52.1   | 7.3     | 18.9    | 13.7    | 19.4    | 0.209621779 | 27.975    | 14.825   | 13.15    | 1.887015177 | 0.1355   | -1.813 |
| 93025_at   | 4655.6  | 5506.1  | 5605    | 5652.7 | 7313.7  | 5551.6  | 6500.5  | 5337.3  | 0.176895217 | 5354.85   | 6175.775 | 820.925  | 0.867073363 | 0.1609   | 1.148  |
| 93026_at   | 2335.9  | 2000.5  | 2056.4  | 2354.3 | 3392.5  | 2771.8  | 3035.1  | 2157.6  | 0.081998642 | 2186.775  | 2839.25  | 652.475  | 0.770194594 | 0.0548   | 1.284  |
| 93027_r_at | 66.1    | 63.8    | 58.8    | 52.3   | 117.8   | 71.4    | 78      | 57.3    | 0.206052178 | 60.25     | 81.125   | 20.875   | 0.742681048 | 0.1457   | 1.305  |
| 93028_at   | 9848.3  | 10549.8 | 10091   | 9924   | 9734.8  | 9847.5  | 9363.6  | 11839.9 | 0.88111415  | 10103.275 | 10196.45 | 93.175   | 0.990862016 | 0.926    | -1.005 |
| 93029_at   | 2918.8  | 2331.6  | 2394.2  | 2530.8 | 2525.3  | 2520.6  | 2180.1  | 3037.9  | 0.923608286 | 2543.85   | 2565.975 | 22.125   | 0.991377547 | 0.9502   | -1.006 |
| 93030_at   | 14073.7 | 13004.3 | 13407.1 | 12237  | 15420.8 | 10872.2 | 12235.8 | 14742.4 | 0.909659883 | 13180.525 | 13317.8  | 137.275  | 0.989692367 | 0.9843   | -1.002 |
| 93033_at   | 98.3    | 143.8   | 145     | 92.5   | 106.7   | 167.5   | 125.1   | 155.3   | 0.381552891 | 119.9     | 138.65   | 18.75    | 0.8647674   | 0.3766   | 1.163  |
| 93037_i_at | 290.1   | 136.3   | 223.7   | 273    | 172.8   | 234.7   | 204.4   | 146.4   | 0.347184246 | 230.775   | 189.575  | 41.2     | 1.217328234 | 0.4221   | -1.188 |
| 93038_f_at | 1422.5  | 1292.3  | 1347.4  | 1434.1 | 1664.3  | 1065    | 1498    | 1044.4  | 0.745968917 | 1374.075  | 1317.925 | 56.15    | 1.042604852 | 0.6271   | -1.064 |
| 93039_at   | 757.3   | 626.6   | 660.2   | 658.3  | 778.8   | 789     | 904.5   | 688.5   | 0.080010094 | 675.6     | 790.2    | 114.6    | 0.854973424 | 0.06663  | 1.167  |
| 93040_at   | 1339    | 1457.9  | 1658.7  | 1338.6 | 1939.8  | 1477.4  | 1729.1  | 1735.9  | 0.067898643 | 1448.55   | 1720.55  | 272      | 0.841911017 | 0.06359  | 1.187  |
| 93041_at   | 2150.9  | 1642.9  | 2154.2  | 2038.2 | 1484.1  | 1621.3  | 1908.8  | 1757.1  | 0.09522408  | 1996.55   | 1692.825 | 303.725  | 1.179419019 | 0.09946  | -1.178 |
| 93042_at   | 1778.2  | 1913.7  | 1861.6  | 2026.1 | 2061.9  | 1654.1  | 1960.1  | 1810.7  | 0.831044662 | 1894.9    | 1871.7   | 23.2     | 1.012395149 | 0.8      | -1.015 |
| 93043_at   | 2009.8  | 1677.2  | 1817.4  | 2025.7 | 1569.1  | 1888.7  | 1727.6  | 1915.7  | 0.389510856 | 1882.525  | 1775.275 | 107.25   | 1.060413175 | 0.3963   | -1.061 |
| 93045_at   | 3079.5  | 2152.2  | 3109.9  | 2478.4 | 1508.9  | 2222.4  | 2259.5  | 2122.1  | 0.063782674 | 2705      | 2028.225 | 676.775  | 1.333678463 | 0.06881  | -1.335 |
| 93046_at   | 301.1   | 551.9   | 321.5   | 494.4  | 532.7   | 314.8   | 500.5   | 384.2   | 0.850743657 | 417.225   | 433.05   | 15.825   | 0.963456876 | 0.8066   | -1.051 |
| 93047_at   | 395.3   | 408.5   | 505.6   | 377    | 449.3   | 337.6   | 376.1   | 403     | 0.449431251 | 421.6     | 391.5    | 30.1     | 1.07688378  | 0.4404   | -1.076 |
| 93048_at   | 1368.9  | 1529    | 1491.9  | 1116.7 | 2476    | 1413.6  | 1860.5  | 1244    | 0.275216811 | 1376.625  | 1748.525 | 371.9    | 0.787306444 | 0.2584   | 1.235  |
| 93050_at   | 12.4    | 9.2     | 8.2     | 34.1   | 12.3    | 15.7    | 9.4     | 7.5     | 0.502300571 | 15.975    | 11.225   | 4.75     | 1.423162584 | 0.5771   | -1.238 |
| 93051_at   | 123.7   | 113.8   | 72.9    | 82.3   | 98.5    | 118.2   | 158.9   | 105.6   | 0.270065178 | 98.175    | 120.3    | 22.125   | 0.816084788 | 0.2509   | 1.233  |
| 93053_at   | 279.7   | 220.6   | 254.8   | 325.9  | 227.3   | 204.8   | 296.2   | 236.4   | 0.363258415 | 270.25    | 241.175  | 29.075   | 1.120555613 | 0.3544   | -1.12  |
| 93054_at   | 1068.1  | 1108.3  | 1107.5  | 1048.3 | 913.8   | 892.1   | 983.7   | 1144.6  | 0.17953236  | 1083.05   | 983.55   | 99.5     | 1.10116415  | 0.1315   | -1.106 |
| 93055_at   | 1237.7  | 981     | 1153.1  | 1142.5 | 710.5   | 1060.1  | 882.9   | 973.1   | 0.056571518 | 1128.575  | 906.65   | 221.925  | 1.24477472  | 0.06258  | -1.254 |
| 93056_g_at | 872.7   | 659.3   | 876.5   | 615.7  | 584.9   | 776.5   | 808.1   | 584.7   | 0.489561316 | 756.05    | 688.55   | 67.5     | 1.098032096 | 0.4965   | -1.097 |
| 93057_at   | 4825.4  | 4404.1  | 4060.7  | 4358.3 | 5171.9  | 3854.3  | 3768.3  | 4666.1  | 0.905125449 | 4412.125  | 4365.15  | 46.975   | 1.010761371 | 0.8409   | -1.018 |
| 93058_at   | 1304.4  | 846.7   | 982.4   | 1063.3 | 1006.3  | 1117.3  | 953.9   | 985.2   | 0.760695933 | 1049.2    | 1015.675 | 33.525   | 1.033007606 | 0.8271   | -1.022 |
| 93059_at   | 1499.7  | 1216.5  | 1287.7  | 1304.5 | 992     | 1399.9  | 1295.4  | 1283.7  | 0.462081363 | 1327.1    | 1242.75  | 84.35    | 1.067873667 | 0.4478   | -1.073 |
| 93061_at   | 29.6    | 98.9    | 136     | 151.7  | 84.2    | 31.8    | 42.6    | 146.5   | 0.488045753 | 104.05    | 76.275   | 27.775   | 1.364142904 | 0.5508   | -1.379 |
| 93062_at   | 992.2   | 691     | 967.9   | 791.7  | 792.1   | 781.1   | 829.4   | 704.4   | 0.338522763 | 860.7     | 776.75   | 83.95    | 1.108078532 | 0.3518   | -1.098 |
| 93063_at   | 5551.4  | 7991.6  | 5877.8  | 5994.9 | 5275.4  | 6169.3  | 6688.8  | 6273.8  | 0.706383652 | 6353.925  | 6101.825 | 252.1    | 1.041315508 | 0.7366   | -1.034 |
| 93064_at   | 1091.5  | 837.3   | 880.3   | 1113.6 | 688.1   | 840.5   | 973.5   | 1053.6  | 0.424773789 | 980.675   | 888.925  | 91.75    | 1.103214557 | 0.4184   | -1.109 |
| 93065_at   | 102.2   | 86.1    | 66.9    | 80.6   | 169.9   | 109.3   | 156.7   | 61.8    | 0.199247568 | 83.95     | 124.425  | 40.475   | 0.674703637 | 0.2252   | 1.395  |
| 93066_at   | 707.4   | 1105.1  | 674.5   | 897.7  | 668.3   | 949.8   | 1093.4  | 1074.4  | 0.499399209 | 846.175   | 946.475  | 100.3    | 0.89402784  | 0.5085   | -1.12  |
| 93067_f_at | 1006.6  | 914.9   | 836.9   | 870.2  | 1596.4  | 697.8   | 813.5   | 795.4   | 0.76588759  | 907.15    | 975.775  | 68.625   | 0.929671287 | 0.9279   | -1.018 |
| 93068_r_at | 246.8   | 253.9   | 163     | 222.6  | 464.9   | 140.7   | 238.9   | 270.2   | 0.471630474 | 221.575   | 278.675  | 57.1     | 0.795101821 | 0.5816   | 1.167  |
| 93069_at   | 720.6   | 1167.5  | 891.3   | 1095.2 | 825.5   | 1077.6  | 930.1   | 897.2   | 0.766497859 | 968.65    | 932.6    | 36.05    | 1.038655372 | 0.8434   | -1.026 |
| 93070_at   | 1370.2  | 1382.2  | 1305    | 1339.5 | 1312.6  | 1315.3  | 1303.3  | 1471    | 0.977282719 | 1349.225  | 1350.55  | 1.325    | 0.999018918 | 0.9983   | -1     |
| 93071_at   | 5472.2  | 7882.2  | 6581.9  | 6264.8 | 4055.2  | 6272.3  | 5339.9  | 6481.2  | 0.223945651 | 6550.275  | 5537.15  | 1013.125 | 1.182968675 | 0.2281   | -1.192 |
| 93072_at   | 9.4     | 29.1    | 25.4    | 21.6   | 15.3    | 7.9     | 12.3    | 24      | 0.281173339 | 21.375    | 14.875   | 6.5      | 1.43697479  | 0.3391   | -1.428 |
| 93073_at   | 177.9   | 222     | 248.8   | 232.3  | 177.3   | 198.8   | 205.3   | 213.6   | 0.268597271 | 220.25    | 198.75   | 21.5     | 1.108176101 | 0.2842   | -1.102 |
| 93074_g_at | 20.3    | 30.3    | 22.2    | 20.5   | 21.1    | 27.7    | 31.4    | 23.6    | 0.453689934 | 23.325    | 25.95    | 2.625    | 0.898843931 | 0.425    | -1.116 |
| 93075_r_at | 27.9    | 21.9    | 5.4     | 5.7    | 2.1     | 13.6    | 7.5     | 20.6    | 0.564720252 | 15.225    | 10.95    | 4.275    | 1.390410959 | 0.6096   | -1.424 |
| 93076_at   | 1840.4  | 2241.9  | 1940.6  | 2117.9 | 1571.1  | 2119.3  | 2016.8  | 2417.9  | 0.984961985 | 2035.2    | 2031.275 | 3.925    | 1.001932284 | 0.9172   | -1.011 |
| 93077_s_at | 1730.7  | 1595.4  | 1779.9  | 1869.4 | 1853.6  | 1568.6  | 1637.7  | 2020.5  | 0.833322695 | 1743.85   | 1770.1   | 26.25    | 0.985170329 | 0.8688   | -1.012 |
| 93078_at   | 148     | 156.9   | 178.1   | 171.1  | 231.4   | 144.8   | 176.3   | 198.7   | 0.283825341 | 163.525   | 187.8    | 24.275   | 0.870740149 | 0.2833   | 1.135  |
| 93080_at   | 715.1   | 711.7   | 833.4   | 721.8  | 917.1   | 764.8   | 848.7   | 877.9   | 0.050700395 | 745.5     | 852.125  | 106.625  | 0.874871644 | 0.04879  | 1.143  |
| 93081_at   | 9011.7  | 8086.6  | 8219.5  | 7923.1 | 8516    | 7763.8  | 7625.1  | 8468.5  | 0.541480926 | 8310.225  | 8093.35  | 216.875  | 1.026796691 | 0.5367   | -1.027 |
| 93082_at   | 3191.7  | 2871.5  | 3119.3  | 2731.4 | 3032.9  | 3056    | 2691.8  | 2775.9  | 0.549916673 | 2978.475  | 2889.15  | 89.325   | 1.030917398 | 0.5559   | -1.03  |
| 93083_at   | 5665.3  | 4763.9  | 5544.2  | 4640.4 | 4734.6  | 5335.9  | 4920.9  | 4464    | 0.404955038 | 5153.45   | 4863.85  | 289.6    | 1.05954131  | 0.4105   | -1.058 |
| 93084_at   | 5381.1  | 5543.5  | 5137.8  | 5640.7 | 7102.1  | 6141.7  | 6659.2  | 5204.3  | 0.125701485 | 5425.775  | 6276.825 | 851.05   | 0.864413935 | 0.09377  | 1.15   |



|            |        |        |        |        |        |        |        |        |             |          |          |         |             |          |        |
|------------|--------|--------|--------|--------|--------|--------|--------|--------|-------------|----------|----------|---------|-------------|----------|--------|
| 93085_at   | 73.4   | 29.6   | 51     | 151.4  | 214.6  | 103.6  | 173    | 95.4   | 0.121851383 | 76.35    | 146.65   | 70.3    | 0.520627344 | 0.09866  | 2.163  |
| 93086_at   | 224.9  | 195.8  | 182.5  | 298.6  | 207.7  | 210.4  | 204.1  | 267.4  | 0.923100777 | 225.45   | 222.4    | 3.05    | 1.013714029 | 0.991    | -1.001 |
| 93087_r_at | 284    | 299.7  | 347.7  | 266.8  | 231.7  | 299.3  | 239    | 250.9  | 0.1044562   | 299.55   | 255.225  | 44.325  | 1.173670291 | 0.09327  | -1.174 |
| 93088_at   | 3701   | 2817.5 | 3896.1 | 3981.6 | 3847   | 4108.7 | 3576   | 4595.1 | 0.257222985 | 3599.05  | 4031.7   | 432.65  | 0.892687948 | 0.2643   | 1.126  |
| 93089_at   | 5224   | 4654.1 | 4473.1 | 5593.7 | 3866.9 | 4186.1 | 3673.1 | 3642.4 | 0.013883045 | 4986.225 | 3842.125 | 1144.1  | 1.297777922 | 0.005333 | -1.295 |
| 93090_at   | 479.7  | 616.7  | 526.1  | 582.1  | 488.9  | 661.7  | 766.7  | 913.1  | 0.1785032   | 551.15   | 707.6    | 156.45  | 0.778900509 | 0.1617   | 1.257  |
| 93091_s_at | 265.7  | 302    | 45.8   | 253.4  | 130.3  | 241.5  | 267.4  | 365.7  | 0.664071875 | 216.725  | 251.225  | 34.5    | 0.862672903 | 0.5701   | 1.348  |
| 93092_at   | 187.4  | 328.4  | 275.1  | 240.9  | 422.1  | 457.8  | 455.5  | 452.3  | 0.005587002 | 257.95   | 446.925  | 188.975 | 0.577166191 | 0.003123 | 1.767  |
| 93093_at   | 893.4  | 1017.3 | 904.3  | 1222.6 | 941.3  | 883.1  | 940    | 1240.1 | 0.943103827 | 1009.4   | 1001.125 | 8.275   | 1.008265701 | 0.9336   | -1.009 |
| 93094_at   | 282    | 248.9  | 261.6  | 261.3  | 149.9  | 238.7  | 231.1  | 301.3  | 0.367092325 | 263.45   | 230.25   | 33.2    | 1.144191097 | 0.3101   | -1.178 |
| 93095_at   | 2683   | 2048.8 | 2476.7 | 2269.7 | 2026.9 | 2318.6 | 2262.6 | 1807.2 | 0.190911087 | 2369.55  | 2103.825 | 265.725 | 1.126305658 | 0.1946   | -1.126 |
| 93096_at   | 6.1    | 2.8    | 6.1    | 7.6    | 4.6    | 8.9    | 28.4   | 29     | 0.154780722 | 5.65     | 17.725   | 12.075  | 0.318758815 | 0.1115   | 2.551  |
| 93097_at   | 42.9   | 62.1   | 63     | 55.3   | 82.7   | 64.8   | 46.2   | 48.1   | 0.654931579 | 55.825   | 60.45    | 4.625   | 0.923490488 | 0.717    | -1.064 |
| 93098_at   | 35.6   | 24.1   | 38.1   | 22.4   | 38.5   | 7      | 36.7   | 48.2   | 0.806072374 | 30.05    | 32.6     | 2.55    | 0.921779141 | 0.8261   | -1.113 |
| 93099_f_at | 525.4  | 498.9  | 526.6  | 574.1  | 471.3  | 475.4  | 431.2  | 343.5  | 0.037228756 | 531.25   | 430.35   | 100.9   | 1.234460323 | 0.03632  | -1.243 |
| 93100_at   | 5695.8 | 6272.9 | 6935.1 | 5749.7 | 6705.9 | 5268.5 | 6309   | 4268.1 | 0.438494102 | 6163.375 | 5637.875 | 525.5   | 1.093208877 | 0.3999   | -1.106 |
| 93101_s_at | 5777.9 | 4729.6 | 5598.7 | 5022.6 | 5045.4 | 5611.1 | 5553.7 | 5546.7 | 0.598650554 | 5282.2   | 5439.225 | 157.025 | 0.971130998 | 0.572    | -1.032 |
| 93102_f_at | 884.5  | 719.2  | 814.5  | 833.6  | 823.3  | 845.4  | 842.9  | 666.1  | 0.749187886 | 812.95   | 794.425  | 18.525  | 1.023318753 | 0.7403   | -1.025 |
| 93103_at   | 25.5   | 42.2   | 51.7   | 4.5    | 40.4   | 50     | 76.8   | 42     | 0.163395016 | 30.975   | 52.3     | 21.325  | 0.592256214 | 0.2056   | 2.257  |
| 93104_at   | 1120.3 | 909.9  | 928.3  | 1105   | 699.3  | 1040   | 767.9  | 1062.9 | 0.30801227  | 1015.875 | 892.525  | 123.35  | 1.138203412 | 0.2816   | -1.152 |
| 93105_s_at | 145    | 184.8  | 225.6  | 165.2  | 233.5  | 176.2  | 175.4  | 222.5  | 0.380777058 | 180.15   | 201.9    | 21.75   | 0.892273403 | 0.3619   | 1.126  |
| 93106_i_at | 11.9   | 5.2    | 1.7    | 9.2    | 1      | 0.5    | 0.6    | 4.3    | 0.089822507 | 7        | 1.6      | 5.4     | 4.375       | 0.04653  | -5.107 |
| 93107_r_at | 0.3    | 0.4    | 1.3    | 3.3    | 0.6    | 4.7    | 4.8    | 3.2    | 0.152314338 | 1.325    | 3.325    | 2       | 0.398496241 | 0.2029   | 2.924  |
| 93108_at   | 100.8  | 78     | 96.7   | 109.6  | 75     | 91.7   | 103.5  | 109.9  | 0.906124324 | 96.275   | 95.025   | 1.25    | 1.013154433 | 0.8915   | -1.016 |
| 93109_f_at | 30.3   | 54.6   | 67.5   | 69.6   | 11.8   | 60.8   | 53     | 73.8   | 0.740026796 | 55.5     | 49.85    | 5.65    | 1.11334002  | 0.6011   | -1.291 |
| 93111_at   | 1418.8 | 1559.2 | 1622.8 | 1673.3 | 1437.8 | 1427.5 | 1493.4 | 1768.8 | 0.721205216 | 1568.525 | 1531.875 | 36.65   | 1.023924929 | 0.6924   | -1.026 |
| 93112_at   | 1388.4 | 1406.9 | 1501.6 | 1421   | 1143   | 1015.3 | 988.7  | 1114.7 | 0.000380443 | 1429.475 | 1065.425 | 364.05  | 1.341694629 | 0.000283 | -1.344 |
| 93114_at   | 53.2   | 70.6   | 68.3   | 55.8   | 45.6   | 45.7   | 43.7   | 50     | 0.031728803 | 61.975   | 46.25    | 15.725  | 1.34        | 0.009662 | -1.332 |
| 93116_at   | 1264.5 | 1356.6 | 1361.1 | 1207.3 | 1158.3 | 1370.4 | 1246.1 | 1469.4 | 0.868125136 | 1297.375 | 1311.05  | 13.675  | 0.989569429 | 0.9028   | -1.008 |
| 93117_at   | 7818.6 | 6903.8 | 7027.1 | 8186.4 | 7053.1 | 6476.6 | 6301.7 | 6743.5 | 0.066667544 | 7483.975 | 6643.725 | 840.25  | 1.126472724 | 0.04999  | -1.125 |
| 93118_at   | 770    | 807.4  | 757.8  | 649.7  | 842.6  | 916.3  | 763.9  | 803.3  | 0.119147402 | 746.225  | 831.525  | 85.3    | 0.897417396 | 0.1231   | 1.115  |
| 93119_at   | 4581.2 | 4436.6 | 3924.3 | 3678.2 | 6892.5 | 3747.2 | 4264.5 | 3931.9 | 0.514809438 | 4155.075 | 4709.025 | 553.95  | 0.882364184 | 0.5386   | -1.102 |
| 93120_f_at | 666.7  | 668.7  | 674.1  | 1063.8 | 807.1  | 1018.8 | 1000.2 | 1220.2 | 0.111047284 | 768.325  | 1011.575 | 243.25  | 0.759533401 | 0.09303  | 1.331  |
| 93121_at   | 40.7   | 67.7   | 45     | 57.6   | 42.9   | 30.1   | 57.7   | 52.1   | 0.44392293  | 52.75    | 45.7     | 7.05    | 1.154266958 | 0.4387   | -1.165 |
| 93122_at   | 39.9   | 11.1   | 2      | 20.9   | 12.5   | 3.4    | 2.7    | 37.5   | 0.711993042 | 18.475   | 14.025   | 4.45    | 1.317290553 | 0.7019   | -1.429 |
| 93124_at   | 7.2    | 24.3   | 8.3    | 33.6   | 34.1   | 32.3   | 14.5   | 12.7   | 0.577344859 | 18.35    | 23.4     | 5.05    | 0.784188034 | 0.4727   | 1.427  |
| 93126_at   | 842.3  | 673.6  | 871.8  | 951.6  | 1189.4 | 841    | 1320.3 | 1407.9 | 0.057763572 | 834.825  | 1189.65  | 354.825 | 0.701740008 | 0.04534  | 1.41   |
| 93127_at   | 53.1   | 58.2   | 61.6   | 89.2   | 64.4   | 68.3   | 49.5   | 75.4   | 0.912464454 | 65.525   | 64.4     | 1.125   | 1.017468944 | 0.9541   | -1.009 |
| 93128_at   | 39.5   | 50     | 58.7   | 64.7   | 39.4   | 37.6   | 34.4   | 50.9   | 0.109480138 | 53.225   | 40.575   | 12.65   | 1.31176833  | 0.1006   | -1.304 |
| 93129_at   | 5.9    | 10.7   | 11.4   | 6.6    | 14.9   | 11.5   | 12.7   | 12.6   | 0.047136422 | 8.65     | 12.925   | 4.275   | 0.669245648 | 0.04613  | 1.55   |
| 93130_at   | 341.1  | 373.3  | 355.8  | 401    | 404.1  | 377.6  | 445.6  | 384    | 0.132319824 | 367.8    | 402.825  | 35.025  | 0.913051573 | 0.1255   | -1.095 |
| 93131_at   | 14.1   | 51.5   | 75.7   | 15.3   | 18.2   | 33     | 17.6   | 47.5   | 0.573631731 | 39.15    | 29.075   | 10.075  | 1.346517627 | 0.7995   | -1.139 |
| 93132_at   | 3.6    | 2.2    | 7.8    | 5.9    | 21.5   | 7.1    | 21.9   | 9.2    | 0.078847054 | 4.875    | 14.925   | 10.05   | 0.326633166 | 0.03277  | 3.037  |
| 93133_at   | 36.3   | 15.9   | 20.7   | 22.7   | 25.3   | 24.7   | 20     | 54.7   | 0.460707351 | 23.9     | 31.175   | 7.275   | 0.766639936 | 0.4411   | 1.259  |
| 93134_at   | 45     | 47.2   | 58.9   | 20.9   | 70.9   | 40.9   | 27.7   | 52.4   | 0.696487278 | 43       | 47.975   | 4.975   | 0.896300156 | 0.7049   | 1.127  |
| 93136_at   | 26.1   | 23.4   | 28.4   | 1.8    | 10.6   | 16     | 6.9    | 2.9    | 0.17985288  | 19.925   | 9.1      | 10.825  | 2.18956044  | 0.4884   | -1.754 |
| 93137_at   | 37.5   | 18.7   | 26.9   | 21.5   | 97.1   | 96.2   | 55.3   | 13.7   | 0.139710741 | 26.15    | 65.575   | 39.425  | 0.398780023 | 0.1915   | 2.043  |
| 93138_at   | 610.1  | 557.8  | 659.7  | 535.8  | 523.3  | 503.3  | 473.8  | 571.1  | 0.082581027 | 590.85   | 517.875  | 72.975  | 1.140912382 | 0.0748   | -1.14  |
| 93139_at   | 362.3  | 327.4  | 355.8  | 397.1  | 329.1  | 293    | 296    | 308.8  | 0.023784031 | 360.65   | 306.725  | 53.925  | 1.175808949 | 0.01486  | -1.174 |
| 93140_at   | 33     | 32.3   | 18.1   | 23.7   | 22     | 20.2   | 27.9   | 43.9   | 0.800045165 | 26.775   | 28.5     | 1.725   | 0.939473684 | 0.8523   | -1.045 |
| 93141_at   | 1283.8 | 1256.6 | 1065.3 | 1157.8 | 649.2  | 640.6  | 598.7  | 490.9  | 0.000119354 | 1190.875 | 594.85   | 596.025 | 2.001975288 | 0.000104 | -2.009 |
| 93142_at   | 62.2   | 33.4   | 50.3   | 79.2   | 49.6   | 82.7   | 73.9   | 52.2   | 0.534777994 | 56.275   | 64.6     | 8.325   | 0.871130031 | 0.4935   | 1.176  |
| 93143_at   | 116    | 125.8  | 134.6  | 125.4  | 147.4  | 122.2  | 161.2  | 165.6  | 0.088973919 | 125.45   | 149.1    | 23.65   | 0.841381623 | 0.06787  | 1.182  |
| 93144_at   | 766.4  | 634.5  | 672.3  | 933.9  | 451.3  | 669.9  | 731.5  | 765.1  | 0.354998774 | 751.775  | 654.45   | 97.325  | 1.148712659 | 0.3566   | -1.159 |
| 93145_at   | 154.1  | 212.2  | 198.9  | 208.8  | 214.4  | 219.7  | 185.2  | 251.8  | 0.251845188 | 193.5    | 217.775  | 24.275  | 0.888531741 | 0.2641   | 1.128  |
| 93146_at   | 61.3   | 53.7   | 30     | 40.5   | 86.3   | 55.1   | 35     | 53.9   | 0.416727916 | 46.375   | 57.575   | 11.2    | 0.805471125 | 0.4389   | 1.224  |



|            |        |        |        |        |        |        |        |        |             |         |         |         |             |          |        |
|------------|--------|--------|--------|--------|--------|--------|--------|--------|-------------|---------|---------|---------|-------------|----------|--------|
| 93147_f_at | 65     | 62.3   | 51.3   | 54.8   | 63     | 50.6   | 83.4   | 108.1  | 0.251383377 | 58.35   | 76.275  | 17.925  | 0.764995084 | 0.2332   | 1.26   |
| 93148_at   | 279.1  | 225.7  | 189    | 236.9  | 249.6  | 255.6  | 270.6  | 193.1  | 0.717166442 | 232.675 | 242.225 | 9.55    | 0.960573847 | 0.717    | -1.043 |
| 93151_at   | 64.1   | 80.8   | 63     | 83.1   | 39.7   | 58.4   | 148.7  | 80.8   | 0.73036972  | 72.75   | 81.9    | 9.15    | 0.888278388 | 0.9821   | -1.007 |
| 93153_at   | 142.6  | 136.3  | 179    | 185.4  | 140.4  | 165.6  | 170    | 157.8  | 0.873315152 | 160.825 | 158.45  | 2.375   | 1.014988956 | 0.9281   | -1.008 |
| 93155_at   | 92.8   | 116.1  | 128.9  | 137.4  | 121.1  | 157    | 157.7  | 123.3  | 0.186224152 | 118.8   | 139.775 | 20.975  | 0.849937399 | 0.1936   | 1.18   |
| 93158_at   | 124.7  | 223.4  | 122.5  | 161.3  | 154.5  | 188.8  | 229.1  | 207.1  | 0.247336526 | 157.975 | 194.875 | 36.9    | 0.810647851 | 0.2089   | 1.259  |
| 93159_at   | 111.2  | 123.9  | 99     | 114.9  | 111    | 90.1   | 111.2  | 149    | 0.828533438 | 112.25  | 115.325 | 3.075   | 0.973336224 | 0.9063   | -1.014 |
| 93162_f_at | 26.4   | 13.6   | 24.5   | 19     | 2.8    | 7.2    | 10.3   | 16.2   | 0.02689825  | 20.875  | 9.125   | 11.75   | 2.287671233 | 0.05058  | -2.658 |
| 93163_at   | 5.5    | 5.9    | 5.7    | 15.1   | 28.9   | 5.8    | 18.9   | 18.7   | 0.124312407 | 8.05    | 18.075  | 10.025  | 0.445366528 | 0.1206   | 2.144  |
| 93164_at   | 816.7  | 542.6  | 568.4  | 709.5  | 352.5  | 618.5  | 347    | 515.3  | 0.071771767 | 659.3   | 458.325 | 200.975 | 1.438498882 | 0.06928  | -1.463 |
| 93165_at   | 84.2   | 88.9   | 77.1   | 78.7   | 96.3   | 66.8   | 79.1   | 110.5  | 0.587066595 | 82.225  | 88.175  | 5.95    | 0.932520556 | 0.6621   | -1.054 |
| 93166_at   | 12.5   | 22.8   | 1.6    | 6.2    | 13.4   | 16.7   | 6.4    | 4.5    | 0.9265224   | 10.775  | 10.25   | 0.525   | 1.051219512 | 0.7547   | 1.237  |
| 93167_f_at | 1.3    | 2.1    | 1.4    | 4      | 3.1    | 5.4    | 7      | 12.1   | 0.085966702 | 2.2     | 6.9     | 4.7     | 0.31884058  | 0.02536  | 3.051  |
| 93168_at   | 6.6    | 18.5   | 13.2   | 15.8   | 2.2    | 8.1    | 17.3   | 15     | 0.528041029 | 13.525  | 10.65   | 2.875   | 1.269953052 | 0.4416   | -1.542 |
| 93169_at   | 1251.5 | 956.2  | 1002.7 | 1232.6 | 976.8  | 1099.7 | 1076.2 | 663.8  | 0.26398273  | 1110.75 | 954.125 | 156.625 | 1.16415564  | 0.2742   | -1.178 |
| 93173_at   | 71.7   | 150.2  | 138.5  | 116.2  | 147.5  | 155.3  | 167.4  | 131    | 0.172962303 | 119.15  | 150.3   | 31.15   | 0.792747838 | 0.1763   | 1.305  |
| 93174_at   | 295.3  | 521.1  | 439.5  | 392.7  | 460.4  | 409.4  | 496    | 627.6  | 0.241125659 | 412.15  | 498.35  | 86.2    | 0.827029196 | 0.2335   | 1.219  |
| 93175_at   | 333.2  | 351.7  | 390.2  | 379.6  | 324    | 360.6  | 366.9  | 396.6  | 0.936291362 | 363.675 | 362.025 | 1.65    | 1.004557696 | 0.928    | -1.005 |
| 93177_at   | 222.2  | 204.8  | 193.6  | 196.8  | 131.6  | 261.5  | 190.7  | 199.1  | 0.771028746 | 204.35  | 195.725 | 8.625   | 1.044066931 | 0.6417   | -1.073 |
| 93178_at   | 153.8  | 201.4  | 177.7  | 168.1  | 221.1  | 177    | 176.7  | 74.1   | 0.713115224 | 175.25  | 162.225 | 13.025  | 1.080289721 | 0.5735   | -1.159 |
| 93179_at   | 59.6   | 48.9   | 67.1   | 61.4   | 23.9   | 55.3   | 57.5   | 40.7   | 0.154139918 | 59.25   | 44.35   | 14.9    | 1.335963923 | 0.1624   | -1.404 |
| 93180_at   | 25     | 28.9   | 37.5   | 28.3   | 11.3   | 11.4   | 20.9   | 35.7   | 0.182386592 | 29.925  | 19.825  | 10.1    | 1.509457755 | 0.1223   | -1.682 |
| 93181_r_at | 13.9   | 11.4   | 15.6   | 62.8   | 93.4   | 31.3   | 20.1   | 93.6   | 0.206628996 | 25.925  | 59.6    | 33.675  | 0.434983221 | 0.1573   | 2.438  |
| 93182_at   | 13.7   | 14.5   | 30.7   | 22.1   | 101.4  | 33.5   | 26.4   | 25.4   | 0.24622119  | 20.25   | 46.675  | 26.425  | 0.433851098 | 0.1091   | 2.03   |
| 93183_at   | 824.3  | 568.1  | 695.7  | 606.5  | 501.5  | 719.7  | 569.1  | 580.8  | 0.31228351  | 673.65  | 592.775 | 80.875  | 1.136434566 | 0.3004   | -1.134 |
| 93184_at   | 331.8  | 335.1  | 296.7  | 302.7  | 311.9  | 333.7  | 377.9  | 284.4  | 0.659775192 | 316.575 | 326.975 | 10.4    | 0.968193287 | 0.6885   | -1.029 |
| 93185_at   | 132.4  | 123.5  | 142    | 121.7  | 113.3  | 117.1  | 115.6  | 159    | 0.774096588 | 129.9   | 126.25  | 3.65    | 1.028910891 | 0.6907   | -1.037 |
| 93186_at   | 18.5   | 8.9    | 17.6   | 18.1   | 21.1   | 9.6    | 7.7    | 37.5   | 0.682623348 | 15.775  | 18.975  | 3.2     | 0.831357049 | 0.9498   | -1.027 |
| 93187_at   | 1545.7 | 2458.7 | 1741.2 | 1948   | 2046.3 | 1832.5 | 2165.7 | 2025.1 | 0.676616743 | 1923.4  | 2017.4  | 94      | 0.953405373 | 0.5824   | -1.063 |
| 93188_at   | 266.2  | 221.1  | 240    | 305.2  | 166.4  | 273.9  | 182.8  | 260.7  | 0.304198235 | 258.125 | 220.95  | 37.175  | 1.168250735 | 0.2765   | -1.187 |
| 93190_at   | 235.1  | 333.9  | 326.7  | 343.3  | 270.5  | 324.1  | 310.6  | 321.3  | 0.916077327 | 309.75  | 306.625 | 3.125   | 1.010191602 | 0.988    | -1.002 |
| 93191_at   | 565.1  | 493.9  | 398.8  | 414.9  | 306.7  | 667.7  | 429.2  | 536.5  | 0.853278739 | 468.175 | 485.025 | 16.85   | 0.965259523 | 0.9784   | -1.005 |
| 93193_at   | 90.3   | 65     | 74.6   | 82.4   | 69.6   | 68.6   | 53.5   | 86.7   | 0.368293194 | 78.075  | 69.6    | 8.475   | 1.121767241 | 0.3542   | -1.129 |
| 93194_at   | 12.9   | 12.6   | 17.3   | 21.2   | 21.7   | 21.2   | 16.4   | 31     | 0.13062127  | 16      | 22.575  | 6.575   | 0.708748616 | 0.1072   | 1.407  |
| 93195_at   | 97.6   | 185.3  | 132.5  | 128.3  | 159.9  | 166.7  | 103.9  | 157.7  | 0.650452762 | 135.925 | 147.05  | 11.125  | 0.924345461 | 0.628    | -1.092 |
| 93196_at   | 30.1   | 15     | 22.9   | 25.5   | 23.5   | 16.2   | 22.2   | 24.8   | 0.664730595 | 23.375  | 21.675  | 1.7     | 1.078431373 | 0.7601   | -1.058 |
| 93197_at   | 35     | 43.3   | 43     | 50     | 32.9   | 34.9   | 56.6   | 47.7   | 0.97627045  | 42.825  | 43.025  | 0.2     | 0.99535154  | 0.9351   | -1.013 |
| 93198_at   | 17.9   | 26.1   | 25.4   | 22.9   | 53     | 23.8   | 27.8   | 22.1   | 0.322689989 | 23.075  | 31.675  | 8.6     | 0.728492502 | 0.273    | 1.299  |
| 93199_at   | 20.4   | 15.2   | 8.4    | 9.6    | 17.7   | 35.9   | 25.6   | 7.7    | 0.27144183  | 13.4    | 21.725  | 8.325   | 0.616800921 | 0.34     | 1.498  |
| 93200_f_at | 78     | 44.2   | 71.5   | 123.1  | 69     | 93.2   | 74.6   | 59     | 0.783142621 | 79.2    | 73.95   | 5.25    | 1.070993915 | 0.9418   | -1.018 |
| 93201_at   | 99.6   | 76.8   | 108.7  | 108.7  | 71.4   | 62.6   | 108.7  | 82.2   | 0.221425909 | 98.45   | 81.225  | 17.225  | 1.212065251 | 0.2056   | -1.227 |
| 93202_at   | 309.6  | 238.9  | 299.1  | 273.8  | 139.1  | 179.4  | 146    | 197    | 0.001596539 | 280.35  | 165.375 | 114.975 | 1.695238095 | 0.001872 | -1.705 |
| 93203_f_at | 58.2   | 60.8   | 50.3   | 51.2   | 59.8   | 68.9   | 72.3   | 41.2   | 0.507830688 | 55.125  | 60.55   | 5.425   | 0.910404624 | 0.6073   | -1.076 |
| 93204_r_at | 13.7   | 13.5   | 16.4   | 23.7   | 19.8   | 16.3   | 16.4   | 12.2   | 0.828187457 | 16.825  | 16.175  | 0.65    | 1.040185471 | 0.8807   | -1.026 |
| 93205_at   | 8.1    | 11     | 13     | 13     | 9.6    | 9.7    | 6.5    | 12.5   | 0.352500654 | 11.275  | 9.575   | 1.7     | 1.177545692 | 0.3671   | -1.187 |
| 93206_g_at | 110    | 111.7  | 87.7   | 99     | 89.7   | 89.8   | 94.1   | 108.1  | 0.383047001 | 102.1   | 95.425  | 6.675   | 1.069950223 | 0.3906   | -1.068 |
| 93207_at   | 39.7   | 27.6   | 45.5   | 36.4   | 49.2   | 37.5   | 47.9   | 33.6   | 0.410027959 | 37.3    | 42.05   | 4.75    | 0.887039239 | 0.4144   | 1.131  |
| 93208_at   | 5.7    | 13.6   | 11     | 11.2   | 15.9   | 21.8   | 16.3   | 50.2   | 0.149319412 | 10.375  | 26.05   | 15.675  | 0.398272553 | 0.04199  | 2.333  |
| 93209_at   | 11     | 10.3   | 8.3    | 9.9    | 12.4   | 8.4    | 19.4   | 11     | 0.304956728 | 9.875   | 12.8    | 2.925   | 0.771484375 | 0.2816   | 1.243  |
| 93210_g_at | 70.4   | 70.2   | 111.8  | 102.6  | 83.7   | 139.1  | 84.9   | 95.3   | 0.50632241  | 88.75   | 100.75  | 12      | 0.8808933   | 0.4869   | 1.135  |
| 93211_at   | 468.3  | 399.1  | 520.5  | 543    | 415.9  | 516.1  | 342.3  | 444    | 0.312013932 | 482.725 | 429.575 | 53.15   | 1.123726939 | 0.3126   | -1.128 |
| 93212_at   | 311.2  | 294.3  | 331.3  | 320.4  | 263.2  | 343.9  | 277.8  | 253.7  | 0.247953362 | 314.3   | 284.65  | 29.65   | 1.104163007 | 0.1966   | -1.111 |
| 93213_at   | 5.7    | 36.6   | 18.6   | 17.4   | 28.1   | 3.3    | 3.1    | 12.8   | 0.406184213 | 19.575  | 11.825  | 7.75    | 1.655391121 | 0.3156   | -2.068 |
| 93214_at   | 82.1   | 68.8   | 66.6   | 110    | 37     | 89.7   | 45.5   | 67.6   | 0.207703058 | 81.875  | 59.95   | 21.925  | 1.365721435 | 0.1779   | -1.418 |
| 93215_at   | 490.2  | 555.9  | 526.1  | 531    | 361.8  | 536.1  | 414.9  | 392.5  | 0.074344959 | 525.8   | 426.325 | 99.475  | 1.233331379 | 0.04811  | -1.246 |
| 93216_at   | 38.4   | 9.9    | 7.9    | 49.3   | 25     | 41.2   | 9.5    | 11.1   | 0.726708722 | 26.375  | 21.7    | 4.675   | 1.215437788 | 0.9006   | -1.078 |



|            |         |        |         |         |         |         |         |         |             |           |           |         |             |          |        |
|------------|---------|--------|---------|---------|---------|---------|---------|---------|-------------|-----------|-----------|---------|-------------|----------|--------|
| 93217_at   | 283.9   | 538.3  | 422.6   | 428.6   | 338.9   | 281.1   | 350.5   | 414.8   | 0.280887562 | 418.35    | 346.325   | 72.025  | 1.207969393 | 0.3068   | -1.189 |
| 93218_at   | 102     | 78.8   | 81      | 146.8   | 65.6    | 122.9   | 68.5    | 72.1    | 0.377660857 | 102.15    | 82.275    | 19.875  | 1.241567912 | 0.3281   | -1.245 |
| 93219_at   | 685.2   | 596.7  | 640.8   | 623.1   | 530.5   | 712     | 479.6   | 425.7   | 0.209026025 | 636.45    | 536.95    | 99.5    | 1.185305894 | 0.1502   | -1.206 |
| 93220_at   | 267.9   | 394    | 407.5   | 313.2   | 292.3   | 490.1   | 325     | 353.2   | 0.734591896 | 345.65    | 365.15    | 19.5    | 0.946597289 | 0.7505   | -1.051 |
| 93221_at   | 783.1   | 984.4  | 830.7   | 913.4   | 538.4   | 852     | 628.9   | 862.5   | 0.153985181 | 877.9     | 720.45    | 157.45  | 1.218543966 | 0.1429   | -1.238 |
| 93222_at   | 338.9   | 282    | 400     | 266.5   | 330.6   | 334.2   | 347.6   | 174.1   | 0.639989691 | 321.85    | 296.625   | 25.225  | 1.085040034 | 0.5986   | -1.111 |
| 93223_at   | 8.5     | 49.6   | 11.7    | 8.1     | 5.8     | 9.8     | 9.4     | 13.7    | 0.404489359 | 19.475    | 9.675     | 9.8     | 2.012919897 | 0.3929   | -1.529 |
| 93224_at   | 37.5    | 21.6   | 40.3    | 24.7    | 20.8    | 64.7    | 55      | 66.9    | 0.146207803 | 31.025    | 51.85     | 20.825  | 0.598360656 | 0.1999   | 1.575  |
| 93225_s_at | 568     | 576.8  | 696.8   | 683.1   | 699.4   | 602.8   | 685.1   | 649.4   | 0.518026875 | 631.175   | 659.175   | 28      | 0.957522661 | 0.495    | -1.047 |
| 93226_i_at | 0.7     | 1.1    | 9       | 0.5     | 12.2    | 0.8     | 7.7     | 5       | 0.298650568 | 2.825     | 6.425     | 3.6     | 0.439688716 | 0.2261   | 3.314  |
| 93227_f_at | 19.2    | 54     | 29.7    | 42.5    | 62.4    | 47.1    | 47.6    | 51.9    | 0.125656103 | 36.35     | 52.25     | 15.9    | 0.69569378  | 0.1182   | 1.535  |
| 93228_at   | 1106.2  | 741.2  | 1071.9  | 1350.1  | 530.2   | 952.2   | 746.9   | 621.8   | 0.066061853 | 1067.35   | 712.775   | 354.575 | 1.497457122 | 0.06232  | -1.5   |
| 93230_at   | 15.7    | 14.6   | 16.8    | 17.5    | 20.2    | 16.1    | 18      | 26.9    | 0.175621089 | 16.15     | 20.3      | 4.15    | 0.795566502 | 0.1227   | 1.235  |
| 93231_at   | 124.2   | 226.7  | 210.3   | 232.7   | 126.3   | 267.9   | 171.8   | 236.5   | 0.959586705 | 198.475   | 200.625   | 2.15    | 0.989283489 | 0.9983   | -1     |
| 93232_at   | 271.2   | 256.2  | 248.6   | 248.7   | 355.4   | 217.1   | 200.4   | 216.9   | 0.826268014 | 256.175   | 247.45    | 8.725   | 1.035259648 | 0.6583   | -1.064 |
| 93234_at   | 64.5    | 94.6   | 130.6   | 53.8    | 82.7    | 79.5    | 138.4   | 87.2    | 0.635516485 | 85.875    | 96.95     | 11.075  | 0.885765859 | 0.5394   | 1.166  |
| 93235_at   | 203.9   | 184.3  | 211.7   | 196.9   | 137.9   | 166.8   | 124.8   | 214.1   | 0.146644559 | 199.2     | 160.9     | 38.3    | 1.238036047 | 0.1043   | -1.264 |
| 93236_s_at | 974     | 893.6  | 981     | 887.9   | 720.1   | 687     | 782.2   | 736.3   | 0.000885577 | 934.125   | 731.4     | 202.725 | 1.277173913 | 0.000669 | -1.277 |
| 93237_s_at | 708.5   | 597.6  | 889.4   | 539.2   | 695.2   | 466.6   | 603     | 415.5   | 0.216795702 | 683.675   | 545.075   | 138.6   | 1.254276934 | 0.2036   | -1.257 |
| 93238_at   | 636.8   | 924.6  | 928.1   | 866.2   | 1117.9  | 908.1   | 1048.9  | 803.9   | 0.232559835 | 838.925   | 969.7     | 130.775 | 0.865138703 | 0.2492   | 1.16   |
| 93240_f_at | 877.4   | 760.4  | 830.7   | 767.3   | 642.2   | 933.9   | 769.8   | 740.8   | 0.604359001 | 808.95    | 771.675   | 37.275  | 1.048304014 | 0.5423   | -1.056 |
| 93241_r_at | 51.1    | 60     | 54.8    | 57.4    | 55      | 73.8    | 64      | 59.9    | 0.166768294 | 55.825    | 63.175    | 7.35    | 0.88365651  | 0.1425   | -1.127 |
| 93242_at   | 11      | 20.9   | 18.8    | 21      | 17.3    | 21.4    | 16.8    | 21      | 0.672162387 | 17.925    | 19.125    | 1.2     | 0.937254902 | 0.6015   | -1.096 |
| 93243_at   | 215.4   | 255.3  | 255     | 165.7   | 193.8   | 265.5   | 206.5   | 177.9   | 0.690996879 | 222.85    | 210.925   | 11.925  | 1.056536684 | 0.7124   | -1.053 |
| 93244_at   | 55.3    | 61.6   | 46.2    | 26.5    | 20.5    | 20.3    | 43.7    | 70.3    | 0.564391021 | 47.4      | 38.7      | 8.7     | 1.224806202 | 0.4385   | -1.346 |
| 93245_at   | 35      | 27.7   | 47.8    | 42.2    | 81.3    | 8.5     | 43.3    | 13.3    | 0.932676271 | 38.175    | 36.6      | 1.575   | 1.043032787 | 0.4842   | -1.489 |
| 93246_at   | 504.1   | 399    | 328.6   | 451.5   | 301.3   | 404.6   | 257.6   | 423     | 0.224806373 | 420.8     | 346.625   | 74.175  | 1.213992066 | 0.2265   | -1.224 |
| 93248_at   | 140.3   | 136.6  | 164.8   | 193.5   | 113.7   | 142.3   | 147     | 212.8   | 0.852208152 | 158.8     | 153.95    | 4.85    | 1.031503735 | 0.7686   | -1.048 |
| 93250_r_at | 1065.1  | 878.8  | 819.8   | 1273    | 859     | 974     | 762.2   | 822.2   | 0.235990473 | 1009.175  | 854.35    | 154.825 | 1.181219641 | 0.2133   | -1.168 |
| 93251_at   | 365.4   | 360    | 366.3   | 352.4   | 592.8   | 436.9   | 386.6   | 431.3   | 0.110797733 | 361.025   | 461.9     | 100.875 | 0.781608573 | 0.04462  | 1.263  |
| 93252_at   | 1763.1  | 1438.7 | 1473.1  | 1602.3  | 1510.1  | 1455.1  | 1665    | 1603.9  | 0.906461843 | 1569.3    | 1558.525  | 10.775  | 1.006913588 | 0.93     | -1.005 |
| 93253_at   | 310.4   | 435    | 480.5   | 626.8   | 307.7   | 353.6   | 278.5   | 325.6   | 0.107450762 | 463.175   | 316.35    | 146.825 | 1.464122017 | 0.06074  | -1.425 |
| 93254_at   | 2435.5  | 2276   | 2379.3  | 2550.4  | 1890.8  | 2385.6  | 2025.7  | 2386.8  | 0.158640037 | 2410.3    | 2172.225  | 238.075 | 1.109599604 | 0.1391   | -1.114 |
| 93255_at   | 1208.6  | 1403.8 | 1336.7  | 1427.6  | 1023.4  | 1552.7  | 1284.2  | 1638.8  | 0.846732196 | 1344.175  | 1374.775  | 30.6    | 0.977741812 | 0.9453   | -1.008 |
| 93256_at   | 372.7   | 411.6  | 407     | 379.5   | 413.2   | 459.4   | 413.9   | 428     | 0.048885775 | 392.7     | 428.625   | 35.925  | 0.916185477 | 0.04702  | -1.091 |
| 93257_at   | 1708.5  | 1533   | 1618    | 1505.6  | 1255.1  | 1578.9  | 1429    | 1304.2  | 0.066441926 | 1591.275  | 1391.8    | 199.475 | 1.143321598 | 0.05848  | -1.147 |
| 93258_at   | 631.6   | 651.9  | 830.2   | 676.5   | 1018.1  | 662     | 771.7   | 618.8   | 0.519227645 | 697.55    | 767.65    | 70.1    | 0.908682342 | 0.5379   | -1.086 |
| 93259_at   | 7.5     | 8.4    | 10.3    | 13.3    | 5.9     | 3.3     | 2.2     | 1.9     | 0.007396436 | 9.875     | 3.325     | 6.55    | 2.969924812 | 0.006211 | -3.213 |
| 93261_at   | 721.3   | 700.5  | 797.3   | 692.2   | 829.6   | 631     | 538.3   | 620.2   | 0.334258529 | 727.825   | 654.775   | 73.05   | 1.111565041 | 0.2689   | -1.124 |
| 93264_at   | 795.2   | 1221.8 | 894.4   | 1019.1  | 1068.4  | 856.5   | 970     | 1008.5  | 0.950092585 | 982.625   | 975.85    | 6.775   | 1.006942665 | 0.9802   | -1.003 |
| 93265_at   | 49.3    | 134.5  | 108.1   | 103     | 142.5   | 113.2   | 165     | 46.4    | 0.587987567 | 98.725    | 116.775   | 18.05   | 0.845429244 | 0.7318   | 1.137  |
| 93266_at   | 439.3   | 461.4  | 526.9   | 488.3   | 548.9   | 505.8   | 512.7   | 564.4   | 0.065253155 | 478.975   | 532.95    | 53.975  | 0.898724083 | 0.06191  | -1.114 |
| 93267_at   | 1955.7  | 1683.2 | 1852.5  | 2105.5  | 1265.8  | 1951.5  | 1801.7  | 1783.4  | 0.306792541 | 1899.225  | 1700.6    | 198.625 | 1.116797013 | 0.3045   | -1.128 |
| 93268_at   | 2261.8  | 1754.7 | 1570.7  | 2318.7  | 1663.5  | 1724.1  | 1418.3  | 1685.3  | 0.151773238 | 1976.475  | 1622.8    | 353.675 | 1.217941213 | 0.1277   | -1.205 |
| 93269_at   | 3028.7  | 2169.4 | 2242    | 3002.5  | 2414.4  | 1946.3  | 2585.6  | 2559.5  | 0.436354778 | 2610.65   | 2376.45   | 234.2   | 1.098550359 | 0.4623   | -1.092 |
| 93270_at   | 1452.8  | 1213.4 | 1269.5  | 1356.1  | 1184.8  | 1503.4  | 1374.4  | 1603.3  | 0.412822689 | 1322.95   | 1416.475  | 93.525  | 0.93397342  | 0.4326   | -1.066 |
| 93271_s_at | 12752.7 | 17543  | 16546.6 | 13245.4 | 20928.8 | 14405.2 | 18495.5 | 14377.8 | 0.353735298 | 15021.925 | 17051.825 | 2029.9  | 0.880957024 | 0.3557   | 1.131  |
| 93272_at   | 545.4   | 573.2  | 593.7   | 557.4   | 622.1   | 536     | 618     | 485.2   | 0.955175991 | 567.425   | 565.325   | 2.1     | 1.003714677 | 0.8961   | -1.009 |
| 93273_at   | 52.5    | 46.3   | 59.5    | 51.7    | 45.6    | 69.5    | 55.2    | 81.3    | 0.283996152 | 52.5      | 62.9      | 10.4    | 0.834658188 | 0.2858   | 1.174  |
| 93274_at   | 2301.4  | 2092.3 | 2209.9  | 2739.3  | 1951.8  | 2665.9  | 2205.5  | 2081    | 0.620395294 | 2335.725  | 2226.05   | 109.675 | 1.049268884 | 0.5955   | -1.051 |
| 93275_at   | 521.3   | 886.7  | 697.9   | 609.4   | 729.2   | 863.9   | 661.3   | 659.9   | 0.610605728 | 678.825   | 728.575   | 49.75   | 0.931716021 | 0.5403   | -1.087 |
| 93276_at   | 3907.4  | 3131.3 | 3691.6  | 3176.9  | 2878.6  | 2821.4  | 3071.2  | 2664.9  | 0.040486546 | 3476.8    | 2859.025  | 617.775 | 1.216078908 | 0.02136  | -1.212 |
| 93277_at   | 7956.8  | 6711   | 7023.5  | 7906.8  | 7599.4  | 6917.8  | 6127.4  | 6992.8  | 0.303618363 | 7399.525  | 6909.35   | 490.175 | 1.070943721 | 0.3068   | -1.071 |
| 93278_at   | 1007.6  | 1101.6 | 1421.5  | 843.7   | 480.7   | 878.7   | 952.6   | 1044.3  | 0.193405978 | 1093.6    | 839.075   | 254.525 | 1.303339987 | 0.2119   | -1.334 |
| 93279_at   | 42.1    | 11.9   | 8.8     | 30.6    | 25.5    | 13.1    | 17.5    | 15.6    | 0.553373385 | 23.35     | 17.925    | 5.425   | 1.30264993  | 0.8157   | -1.102 |
| 93281_at   | 1175.6  | 1327.3 | 1064.1  | 1117.7  | 1106.5  | 1245.7  | 1206.7  | 1085.8  | 0.889630824 | 1171.175  | 1161.175  | 10      | 1.008611966 | 0.9101   | -1.007 |



|            |         |        |         |         |         |         |         |         |             |           |           |          |             |          |        |
|------------|---------|--------|---------|---------|---------|---------|---------|---------|-------------|-----------|-----------|----------|-------------|----------|--------|
| 93282_at   | 13.1    | 25.9   | 25.9    | 20.2    | 20.2    | 39.3    | 16.4    | 17.8    | 0.741679683 | 21.275    | 23.425    | 2.15     | 0.908217716 | 0.8044   | -1.068 |
| 93283_at   | 147.6   | 136.5  | 166.5   | 128.4   | 141.5   | 147.6   | 105.8   | 141.8   | 0.435112502 | 144.75    | 134.175   | 10.575   | 1.07881498  | 0.4343   | -1.083 |
| 93284_at   | 1732.6  | 2027.5 | 2031.9  | 1691.8  | 1671.3  | 2491.3  | 1766.5  | 2147.7  | 0.514893283 | 1870.95   | 2019.2    | 148.25   | 0.926579834 | 0.5432   | -1.069 |
| 93285_at   | 1800.6  | 1553.4 | 1610.6  | 1839.4  | 583.8   | 880.1   | 757.6   | 1066.8  | 0.000652521 | 1701      | 822.075   | 878.925  | 2.069154274 | 0.001387 | -2.114 |
| 93287_at   | 155.6   | 103.4  | 78      | 138     | 106.8   | 92.9    | 62.3    | 78      | 0.15390095  | 118.75    | 85        | 33.75    | 1.397058824 | 0.1501   | -1.376 |
| 93288_at   | 4581    | 4540.4 | 4107.7  | 4039.9  | 4594.1  | 4047.4  | 4458.8  | 3943.7  | 0.799231663 | 4317.25   | 4261      | 56.25    | 1.013201126 | 0.7927   | -1.014 |
| 93290_at   | 1155.5  | 988.7  | 883.9   | 839.5   | 1327    | 1137.4  | 1166.3  | 976     | 0.115612219 | 966.9     | 1151.675  | 184.775  | 0.839559772 | 0.1115   | 1.193  |
| 93293_at   | 15322.7 | 14464  | 16255.7 | 14490.5 | 19576.5 | 12934.7 | 14724.6 | 16258.1 | 0.644532443 | 15133.225 | 15873.475 | 740.25   | 0.953365599 | 0.6978   | -1.038 |
| 93294_at   | 785     | 1051.2 | 943.6   | 963.5   | 454.2   | 772.9   | 673.8   | 625.7   | 0.013369519 | 935.825   | 631.65    | 304.175  | 1.481556242 | 0.01952  | -1.5   |
| 93295_at   | 5841.2  | 4943   | 4721.1  | 5041.8  | 5051.1  | 5193.8  | 5282.6  | 6058.4  | 0.464698148 | 5136.775  | 5396.475  | 259.7    | 0.951875993 | 0.4455   | -1.051 |
| 93296_at   | 260.1   | 280.8  | 285.3   | 215.9   | 194.8   | 213.2   | 196.9   | 178.4   | 0.019027171 | 260.525   | 195.825   | 64.7     | 1.330397038 | 0.008651 | -1.325 |
| 93298_at   | 1601.2  | 1567.3 | 1572.3  | 1226.5  | 1093.8  | 1399.6  | 1424.4  | 1347.8  | 0.184908907 | 1491.825  | 1316.4    | 175.425  | 1.133261167 | 0.2066   | -1.133 |
| 93299_at   | 97.2    | 129.2  | 93.2    | 46.9    | 87.3    | 108.3   | 59.6    | 82.1    | 0.72623907  | 91.625    | 84.325    | 7.3      | 1.086569819 | 0.8675   | -1.044 |
| 93300_at   | 175.9   | 276.4  | 221.8   | 202.7   | 227.3   | 285.9   | 283.6   | 348.8   | 0.086643582 | 219.2     | 286.4     | 67.2     | 0.765363128 | 0.08165  | 1.309  |
| 93301_at   | 273.3   | 202.9  | 214.9   | 278.9   | 203.9   | 265.5   | 255.4   | 214.6   | 0.768097847 | 242.5     | 234.85    | 7.65     | 1.032573983 | 0.795    | -1.029 |
| 93302_at   | 7.9     | 41.1   | 23.2    | 8.9     | 18.2    | 11.8    | 13.8    | 13.7    | 0.505954145 | 20.275    | 14.375    | 5.9      | 1.410434783 | 0.7697   | -1.132 |
| 93303_at   | 390.2   | 558.7  | 834.2   | 292.2   | 348.6   | 608.4   | 392.5   | 375.9   | 0.542875526 | 518.825   | 431.35    | 87.475   | 1.202793555 | 0.6279   | -1.142 |
| 93304_at   | 72.2    | 12.8   | 63.5    | 83.9    | 122.7   | 82.4    | 98.5    | 54.7    | 0.188483423 | 58.1      | 89.575    | 31.475   | 0.648618476 | 0.2487   | 1.824  |
| 93305_f_at | 1142.7  | 950    | 828.2   | 799.7   | 1227    | 950.5   | 821.5   | 1075.8  | 0.476698964 | 930.15    | 1018.7    | 88.55    | 0.913075488 | 0.4743   | -1.094 |
| 93306_at   | 3472.1  | 3245   | 3530.3  | 3390.2  | 3517.1  | 3231.5  | 3872    | 3529.1  | 0.423846598 | 3409.4    | 3537.425  | 128.025  | 0.96380842  | 0.4247   | -1.036 |
| 93308_s_at | 104.1   | 140.8  | 139.9   | 147.6   | 127.4   | 155.9   | 199.6   | 115.1   | 0.477056449 | 133.1     | 149.5     | 16.4     | 0.890301003 | 0.5072   | -1.108 |
| 93309_at   | 885.1   | 583    | 747.6   | 865.5   | 436.7   | 703     | 628.2   | 597     | 0.093731497 | 770.3     | 591.225   | 179.075  | 1.302888071 | 0.106    | -1.305 |
| 93310_at   | 5844.9  | 4606.8 | 5610    | 5678.3  | 4455.4  | 5024.5  | 5123.9  | 4696.7  | 0.119058386 | 5435      | 4825.125  | 609.875  | 1.126395689 | 0.1149   | -1.123 |
| 93311_at   | 520.1   | 564.1  | 525.9   | 551.7   | 747.9   | 553.1   | 633.3   | 551.7   | 0.177390888 | 540.45    | 621.5     | 81.05    | 0.869589702 | 0.126    | 1.141  |
| 93312_at   | 1244.1  | 1474.7 | 1324.5  | 1552.4  | 1649.4  | 1388.2  | 1520.8  | 1606.4  | 0.1693745   | 1398.925  | 1541.2    | 142.275  | 0.90768557  | 0.1695   | -1.103 |
| 93313_at   | 5.2     | 25.2   | 25.6    | 15.9    | 44.8    | 20.8    | 7.3     | 19.9    | 0.594395906 | 17.975    | 23.2      | 5.225    | 0.774784483 | 0.6787   | 1.258  |
| 93314_g_at | 512.9   | 628.2  | 678.4   | 669.5   | 752.1   | 627.7   | 682.6   | 646.8   | 0.289166254 | 622.25    | 677.3     | 55.05    | 0.918721394 | 0.2878   | -1.092 |
| 93315_at   | 431.7   | 692.1  | 614.5   | 620.4   | 593.5   | 557.6   | 586.3   | 640.3   | 0.939239764 | 589.675   | 594.425   | 4.75     | 0.992009084 | 0.8454   | -1.022 |
| 93316_at   | 1396.8  | 1188.8 | 1143.5  | 1367.7  | 665.5   | 1035.1  | 759.2   | 889.5   | 0.00593604  | 1274.2    | 837.325   | 436.875  | 1.521750814 | 0.007303 | -1.537 |
| 93317_at   | 69.2    | 78     | 58.3    | 116.5   | 85      | 76.1    | 114.3   | 137.4   | 0.275167591 | 80.5      | 103.2     | 22.7     | 0.78003876  | 0.2493   | 1.29   |
| 93318_at   | 259     | 311.4  | 235     | 214.4   | 395.5   | 319.7   | 372.2   | 290.2   | 0.031472798 | 254.95    | 344.4     | 89.45    | 0.740272938 | 0.02943  | 1.354  |
| 93319_at   | 353.8   | 434.4  | 324.2   | 445.8   | 486.5   | 429.5   | 523.5   | 396.7   | 0.142916305 | 389.55    | 459.05    | 69.5     | 0.84860037  | 0.1437   | 1.182  |
| 93320_at   | 3153.4  | 3560.1 | 2997.4  | 2998.4  | 2989.5  | 3665.1  | 3479.1  | 3268    | 0.412875565 | 3177.325  | 3350.425  | 173.1    | 0.948334913 | 0.4118   | -1.054 |
| 93321_at   | 20      | 25.6   | 32.4    | 14.1    | 42.7    | 65.2    | 40.1    | 6.6     | 0.292293676 | 23.025    | 38.65     | 15.625   | 0.595730918 | 0.6125   | 1.333  |
| 93322_at   | 30.6    | 10     | 38.3    | 38      | 5.1     | 19.9    | 40.8    | 15      | 0.403966411 | 29.225    | 20.2      | 9.025    | 1.446782178 | 0.3953   | -1.637 |
| 93323_at   | 4827.5  | 4994.1 | 5495.9  | 4420.9  | 4424.2  | 5322.3  | 5067.7  | 4872    | 0.965881067 | 4934.6    | 4921.55   | 13.05    | 1.002651604 | 0.9755   | -1.002 |
| 93324_at   | 1396.7  | 2271.8 | 1319.2  | 2303.1  | 1659.5  | 2182.8  | 1898    | 2121.2  | 0.652075381 | 1822.7    | 1965.375  | 142.675  | 0.927405711 | 0.5501   | 1.109  |
| 93325_at   | 1067.9  | 1038   | 1014.5  | 906.4   | 1377.1  | 882.9   | 1078.5  | 820.4   | 0.813820373 | 1006.7    | 1039.725  | 33.025   | 0.968236793 | 0.9155   | -1.014 |
| 93326_at   | 959.3   | 933.7  | 840.5   | 822.6   | 716     | 1307.9  | 1238.6  | 1119.3  | 0.217624465 | 889.025   | 1095.45   | 206.425  | 0.811561459 | 0.2408   | 1.203  |
| 93327_at   | 854.3   | 890.3  | 855     | 812.8   | 718.6   | 886.8   | 798.2   | 865.9   | 0.434039404 | 853.1     | 817.375   | 35.725   | 1.043706989 | 0.4057   | -1.047 |
| 93328_at   | 336.1   | 292.9  | 317.9   | 276     | 263.4   | 275.8   | 370.3   | 266.4   | 0.702157084 | 305.725   | 293.975   | 11.75    | 1.039969385 | 0.6304   | -1.048 |
| 93330_at   | 7.3     | 9.4    | 35.4    | 56.4    | 31.2    | 72      | 93.2    | 11.5    | 0.309386573 | 27.125    | 51.975    | 24.85    | 0.521885522 | 0.3381   | 2.043  |
| 93332_at   | 28.8    | 9      | 2.7     | 28.2    | 29.4    | 6.8     | 17.9    | 16.3    | 0.960143487 | 17.175    | 17.6      | 0.425    | 0.975852273 | 0.686    | 1.314  |
| 93333_at   | 3914.3  | 2495.6 | 2931    | 2989.4  | 2468.8  | 2789.7  | 2804.9  | 2413.5  | 0.221488245 | 3082.575  | 2619.225  | 463.35   | 1.176903473 | 0.1846   | -1.164 |
| 93334_at   | 4.8     | 3.4    | 4.4     | 2.3     | 16.8    | 5       | 2.5     | 3.5     | 0.405730382 | 3.725     | 6.95      | 3.225    | 0.535971223 | 0.4407   | 1.447  |
| 93336_at   | 2757.3  | 2138.4 | 2441.1  | 2377.4  | 1999.5  | 2410.9  | 2365.1  | 2202.8  | 0.291958462 | 2428.55   | 2244.575  | 183.975  | 1.081964292 | 0.2937   | -1.08  |
| 93337_at   | 1781.9  | 1320.5 | 1459.5  | 1689.5  | 1266.4  | 1608.2  | 1355.2  | 1346.8  | 0.243661689 | 1562.85   | 1394.15   | 168.7    | 1.121005631 | 0.2407   | -1.118 |
| 93338_at   | 71.8    | 21.6   | 47.3    | 29.8    | 36.2    | 64.9    | 19.6    | 8.8     | 0.55774524  | 42.625    | 32.375    | 10.25    | 1.316602317 | 0.4339   | -1.524 |
| 93339_at   | 777.8   | 815.5  | 960.1   | 858.5   | 662.2   | 997.7   | 890.5   | 953.4   | 0.797147158 | 852.975   | 875.95    | 22.975   | 0.973771334 | 0.8698   | -1.018 |
| 93340_f_at | 1479.8  | 897.4  | 1136.4  | 1170.9  | 775.3   | 1390.3  | 1154.5  | 937.8   | 0.573744832 | 1171.125  | 1064.475  | 106.65   | 1.100190235 | 0.5473   | -1.109 |
| 93341_r_at | 3964.3  | 3036   | 3624.1  | 2807.6  | 3453.7  | 3105.4  | 2919.3  | 3940.2  | 0.992629931 | 3358      | 3354.65   | 3.35     | 1.000998614 | 0.9865   | -1.002 |
| 93342_at   | 532.5   | 339.7  | 353.2   | 489.8   | 335     | 402.1   | 342.8   | 453.5   | 0.454101286 | 428.8     | 383.35    | 45.45    | 1.118560063 | 0.4822   | -1.106 |
| 93346_at   | 2583.2  | 1606   | 1958.1  | 2147.9  | 1348.5  | 2007.8  | 1982.5  | 2104.6  | 0.456297857 | 2073.8    | 1860.85   | 212.95   | 1.114436951 | 0.4756   | -1.115 |
| 93347_at   | 740.1   | 1221.5 | 1086.9  | 1100.9  | 612.6   | 1151.6  | 777     | 1186.6  | 0.571114883 | 1037.35   | 931.95    | 105.4    | 1.113096196 | 0.5366   | -1.136 |
| 93348_at   | 810.4   | 589.9  | 675.4   | 726     | 559.6   | 574     | 612.9   | 616.7   | 0.094018086 | 700.425   | 590.8     | 109.625  | 1.185553487 | 0.05913  | -1.179 |
| 93349_at   | 2775.3  | 2745   | 2398.3  | 1725.4  | 5060.1  | 2920.7  | 3756.7  | 3545.4  | 0.043546151 | 2411      | 3820.725  | 1409.725 | 0.631032069 | 0.02794  | 1.581  |



|            |        |        |        |        |        |        |        |        |             |          |          |         |             |          |        |
|------------|--------|--------|--------|--------|--------|--------|--------|--------|-------------|----------|----------|---------|-------------|----------|--------|
| 93350_f_at | 551.9  | 478.4  | 538.9  | 503.4  | 471.2  | 511.7  | 422.9  | 501    | 0.163305693 | 518.15   | 476.7    | 41.45   | 1.086951961 | 0.1671   | -1.088 |
| 93351_at   | 694.9  | 471.4  | 334    | 502    | 426.6  | 686    | 495    | 554.8  | 0.681742883 | 500.575  | 540.6    | 40.025  | 0.925961894 | 0.6168   | -1.1   |
| 93352_at   | 143.7  | 169.8  | 221.2  | 162.1  | 183.9  | 182.3  | 157.1  | 191    | 0.821180714 | 174.2    | 178.575  | 4.375   | 0.97550049  | 0.7423   | -1.035 |
| 93353_at   | 2559.4 | 2161.6 | 1869.9 | 2395.2 | 2121.6 | 2708.6 | 2431.4 | 2905   | 0.241750558 | 2246.525 | 2541.65  | 295.125 | 0.883884484 | 0.2496   | 1.131  |
| 93354_at   | 347.9  | 287.9  | 223.2  | 229.1  | 1064.6 | 586.7  | 720.6  | 729.5  | 0.012445758 | 272.025  | 775.35   | 503.325 | 0.350841555 | 0.000681 | 2.83   |
| 93355_at   | 6.8    | 14.1   | 10     | 6.4    | 22     | 12.3   | 8.1    | 6.6    | 0.490559846 | 9.325    | 12.25    | 2.925   | 0.76122449  | 0.5323   | 1.238  |
| 93356_at   | 2499.4 | 2187.5 | 2677.2 | 2053.3 | 2373.7 | 2141.1 | 2327.4 | 1892.6 | 0.381051192 | 2354.35  | 2183.7   | 170.65  | 1.078147181 | 0.3899   | -1.076 |
| 93358_at   | 3564.3 | 2695.3 | 2908.3 | 2728.7 | 3104.9 | 2627.1 | 2633.2 | 2083.1 | 0.259395852 | 2974.15  | 2612.075 | 362.075 | 1.138615851 | 0.2492   | -1.143 |
| 93359_at   | 69.4   | 31.1   | 47.8   | 45.8   | 26.9   | 55.8   | 33     | 65.7   | 0.802355499 | 48.525   | 45.35    | 3.175   | 1.070011025 | 0.7389   | -1.098 |
| 93360_at   | 492    | 481.1  | 570    | 355.7  | 451.5  | 502    | 517    | 440.1  | 0.954053302 | 474.7    | 477.65   | 2.95    | 0.99382393  | 0.8717   | -1.018 |
| 93362_at   | 4446.3 | 3685.1 | 4287.6 | 3727   | 3492.2 | 4015.7 | 3417.8 | 3555.9 | 0.134249776 | 4036.5   | 3620.4   | 416.1   | 1.114932052 | 0.1239   | -1.113 |
| 93364_at   | 1581.7 | 1347.7 | 1466.2 | 1429.9 | 1013.5 | 1503.4 | 1782.9 | 1257.7 | 0.719222583 | 1456.375 | 1389.375 | 67      | 1.048223122 | 0.612    | -1.069 |
| 93365_s_at | 4206.4 | 3862.8 | 4111.5 | 3554.6 | 4559.2 | 2880.9 | 3050.6 | 2268.4 | 0.22567401  | 3933.825 | 3189.775 | 744.05  | 1.233260967 | 0.1598   | -1.271 |
| 93366_r_at | 2178.6 | 1460.3 | 1715.2 | 1520.9 | 1193.9 | 1173.9 | 1149   | 895.3  | 0.024681208 | 1718.75  | 1103.025 | 615.725 | 1.558214909 | 0.008109 | -1.549 |
| 93367_at   | 92.3   | 70.3   | 72.9   | 115.5  | 72.2   | 108.8  | 23.4   | 23.9   | 0.249951806 | 87.75    | 57.075   | 30.675  | 1.537450723 | 0.1728   | -1.878 |
| 93369_at   | 45.5   | 21.2   | 30.5   | 30.4   | 34     | 23     | 28.9   | 12.9   | 0.328860461 | 31.9     | 24.7     | 7.2     | 1.291497976 | 0.3271   | -1.323 |
| 93370_at   | 14.9   | 40.6   | 19.1   | 5.3    | 10     | 8.2    | 43.1   | 40.2   | 0.669723537 | 19.975   | 25.375   | 5.4     | 0.787192118 | 0.7392   | 1.237  |
| 93371_at   | 188    | 158.8  | 142.4  | 177.8  | 181.1  | 304.2  | 271.4  | 302.8  | 0.03637264  | 166.75   | 264.875  | 98.125  | 0.629542237 | 0.01728  | 1.564  |
| 93372_at   | 2076.2 | 1002.8 | 426.5  | 1904   | 1052.8 | 1740.4 | 1682.2 | 1202.8 | 0.881665674 | 1352.375 | 1419.55  | 67.175  | 0.952678666 | 0.6295   | 1.217  |
| 93373_at   | 301.6  | 615    | 430.7  | 519.6  | 566    | 406.3  | 501.6  | 406.1  | 0.967895183 | 466.725  | 470      | 3.275   | 0.993031915 | 0.8678   | -1.031 |
| 93374_at   | 51.6   | 55.6   | 60.1   | 72.6   | 69.5   | 95.3   | 94.8   | 106.8  | 0.018872113 | 59.975   | 91.6     | 31.625  | 0.654748908 | 0.01187  | 1.522  |
| 93375_at   | 21.7   | 7.3    | 46.3   | 37.8   | 37.8   | 34.7   | 19.2   | 41.2   | 0.640342937 | 28.275   | 33.225   | 4.95    | 0.851015801 | 0.4899   | 1.39   |
| 93376_at   | 153.9  | 215.1  | 163.8  | 148    | 191.1  | 209.7  | 153.4  | 155.1  | 0.74201906  | 170.2    | 177.325  | 7.125   | 0.95981954  | 0.7191   | -1.044 |
| 93378_at   | 136.5  | 163.9  | 143    | 160.5  | 77     | 174.5  | 106.4  | 236.4  | 0.951201565 | 150.975  | 148.575  | 2.4     | 1.016153458 | 0.6951   | -1.11  |
| 93379_at   | 276.1  | 321.4  | 361.4  | 311.8  | 236.7  | 220.9  | 258.8  | 219.8  | 0.010313052 | 317.675  | 234.05   | 83.625  | 1.35729545  | 0.004048 | -1.354 |
| 93380_at   | 32.4   | 17.9   | 81.8   | 59.7   | 52.3   | 104.4  | 21.6   | 112.4  | 0.381751249 | 47.95    | 72.675   | 24.725  | 0.659786722 | 0.4783   | 1.471  |
| 93381_at   | 18     | 14.2   | 16.8   | 37     | 37.2   | 17     | 36.6   | 15.2   | 0.553989466 | 21.5     | 26.5     | 5       | 0.811320755 | 0.5591   | 1.219  |
| 93382_at   | 127.8  | 88.5   | 105.9  | 116    | 98.9   | 113.7  | 144    | 162.3  | 0.280226669 | 109.55   | 129.725  | 20.175  | 0.844478705 | 0.2882   | 1.173  |
| 93383_at   | 149.4  | 237    | 242.4  | 188.2  | 218.3  | 244.2  | 202.5  | 254.7  | 0.355074323 | 204.25   | 229.925  | 25.675  | 0.888333152 | 0.3289   | 1.142  |
| 93384_at   | 16.5   | 33.8   | 34     | 31.9   | 3.9    | 37.5   | 18.8   | 18.6   | 0.299161118 | 29.05    | 19.7     | 9.35    | 1.474619289 | 0.2708   | -1.857 |
| 93385_at   | 220    | 239.4  | 251.4  | 219.9  | 350.5  | 253.4  | 279.4  | 206.3  | 0.281694752 | 232.675  | 272.4    | 39.725  | 0.854166667 | 0.265    | 1.152  |
| 93386_at   | 101.7  | 161.3  | 190.2  | 197.1  | 181.6  | 143.2  | 168.3  | 142.2  | 0.882121548 | 162.575  | 158.825  | 3.75    | 1.023610892 | 0.9862   | -1.003 |
| 93387_at   | 20.1   | 34.2   | 26.5   | 25.3   | 17.9   | 30.7   | 30.2   | 24.3   | 0.863529364 | 26.525   | 25.775   | 0.75    | 1.029097963 | 0.8497   | -1.034 |
| 93388_s_at | 55.7   | 74.5   | 60.6   | 71.9   | 196    | 140.1  | 38.5   | 51.6   | 0.355170198 | 65.675   | 106.55   | 40.875  | 0.616377288 | 0.5125   | 1.317  |
| 93389_at   | 149    | 55.8   | 94     | 88.5   | 90.6   | 98.5   | 87.3   | 104.7  | 0.941951958 | 96.825   | 95.275   | 1.55    | 1.016268696 | 0.8472   | -1.042 |
| 93390_g_at | 48.4   | 17.1   | 33     | 34     | 4.7    | 25.8   | 34.3   | 60.7   | 0.900310807 | 33.125   | 31.375   | 1.75    | 1.055776892 | 0.6025   | -1.384 |
| 93391_at   | 112.7  | 90.2   | 103.9  | 151.5  | 100.8  | 112.8  | 97.9   | 99.4   | 0.440270045 | 114.575  | 102.725  | 11.85   | 1.115356534 | 0.4488   | -1.097 |
| 93392_at   | 54.8   | 44.8   | 67.4   | 80     | 60.4   | 63.9   | 65.4   | 73.6   | 0.644163247 | 61.75    | 65.825   | 4.075   | 0.93809343  | 0.5442   | -1.089 |
| 93393_at   | 193.4  | 224.9  | 221    | 243.1  | 211.8  | 218    | 287.8  | 267.1  | 0.285842452 | 220.6    | 246.175  | 25.575  | 0.896110491 | 0.286    | 1.11   |
| 93394_at   | 3.3    | 2.1    | 3.4    | 3.5    | 4.2    | 3.3    | 1.8    | 1.4    | 0.610231518 | 3.075    | 2.675    | 0.4     | 1.14953271  | 0.4704   | -1.243 |
| 93395_g_at | 105    | 127.6  | 187.4  | 50.1   | 125.1  | 101.4  | 136.7  | 156.2  | 0.708250438 | 117.525  | 129.85   | 12.325  | 0.905082788 | 0.5352   | 1.211  |
| 93396_at   | 329.3  | 294.9  | 304.4  | 308.4  | 356.7  | 284.7  | 259.4  | 394.5  | 0.678130607 | 309.25   | 323.825  | 14.575  | 0.954991122 | 0.7555   | -1.033 |
| 93397_at   | 69.3   | 42.2   | 44.5   | 13.7   | 42.5   | 74.8   | 38.8   | 76.3   | 0.34313107  | 42.425   | 58.1     | 15.675  | 0.73020654  | 0.3262   | 1.517  |
| 93398_at   | 4.1    | 5.3    | 6.5    | 5.7    | 28.9   | 3.9    | 4.3    | 4.3    | 0.482589311 | 5.4      | 10.35    | 4.95    | 0.52173913  | 0.6349   | 1.28   |
| 93399_at   | 10     | 8.4    | 7.2    | 7.1    | 9.5    | 10     | 50.6   | 15.4   | 0.272125102 | 8.175    | 21.375   | 13.2    | 0.38245614  | 0.1242   | 2.034  |
| 93400_at   | 44.3   | 66.3   | 56.5   | 113.2  | 47.1   | 75.6   | 48.7   | 70.7   | 0.597056895 | 70.075   | 60.525   | 9.55    | 1.157786039 | 0.665    | -1.112 |
| 93401_g_at | 15.5   | 7.8    | 12.5   | 22.4   | 22     | 23     | 1.1    | 15.9   | 0.878541848 | 14.55    | 15.5     | 0.95    | 0.938709677 | 0.6781   | -1.395 |
| 93402_i_at | 101.4  | 88.8   | 102.5  | 120.3  | 105.2  | 132.8  | 89.4   | 115.5  | 0.531050519 | 103.25   | 110.725  | 7.475   | 0.932490404 | 0.5508   | -1.068 |
| 93403_at   | 3.8    | 46.5   | 23.5   | 7.1    | 33.4   | 24.4   | 2      | 16.6   | 0.927626343 | 20.225   | 19.1     | 1.125   | 1.058900524 | 0.9754   | -1.028 |
| 93404_g_at | 38     | 155.9  | 29.8   | 108    | 75.2   | 138.1  | 30.5   | 104.3  | 0.917143612 | 82.925   | 87.025   | 4.1     | 0.952887101 | 0.7988   | 1.148  |
| 93405_at   | 81.5   | 70.6   | 66.2   | 120.4  | 79.9   | 59.7   | 42.2   | 95.1   | 0.396197614 | 84.675   | 69.225   | 15.45   | 1.223185265 | 0.3639   | -1.245 |
| 93406_at   | 105.7  | 137.6  | 129.8  | 160.2  | 168.9  | 157.8  | 190.2  | 33.9   | 0.912157146 | 133.325  | 137.7    | 4.375   | 0.968228032 | 0.7452   | -1.152 |
| 93407_at   | 4.8    | 6      | 5      | 8      | 7.9    | 3.5    | 10.5   | 24.2   | 0.301618953 | 5.95     | 11.525   | 5.575   | 0.51626898  | 0.3242   | 1.566  |
| 93408_at   | 136.6  | 161.7  | 146.8  | 146.7  | 165.5  | 188.2  | 142.8  | 130.7  | 0.554378496 | 147.95   | 156.8    | 8.85    | 0.943558673 | 0.5867   | -1.052 |
| 93409_at   | 38.1   | 23.5   | 62.5   | 52.4   | 96.1   | 44.2   | 49.5   | 72.1   | 0.198878904 | 44.125   | 65.475   | 21.35   | 0.673921344 | 0.1904   | 1.508  |
| 93410_at   | 123    | 125    | 108.2  | 162.9  | 103    | 124.8  | 149.7  | 116.1  | 0.691063383 | 129.775  | 123.4    | 6.375   | 1.051661264 | 0.6924   | -1.049 |



|            |        |        |        |        |        |        |        |        |             |          |          |         |             |         |        |
|------------|--------|--------|--------|--------|--------|--------|--------|--------|-------------|----------|----------|---------|-------------|---------|--------|
| 93411_at   | 483.3  | 1043.5 | 708.5  | 742    | 789.2  | 761.7  | 865.9  | 787.3  | 0.659633115 | 744.325  | 801.025  | 56.7    | 0.929215692 | 0.5216  | 1.115  |
| 93412_at   | 7.9    | 9.4    | 9.2    | 10.8   | 11.9   | 11.1   | 15.5   | 10.8   | 0.063249772 | 9.325    | 12.325   | 3       | 0.756592292 | 0.03849 | 1.316  |
| 93413_at   | 237.6  | 325.3  | 193.6  | 222.5  | 299.3  | 266.6  | 284.5  | 201.7  | 0.627270367 | 244.75   | 263.025  | 18.275  | 0.930519913 | 0.5916  | -1.083 |
| 93414_at   | 2.8    | 15.3   | 4.8    | 25.6   | 22.5   | 22.8   | 21.6   | 20.1   | 0.164416612 | 12.125   | 21.75    | 9.625   | 0.557471264 | 0.1167  | 2.546  |
| 93416_at   | 34.5   | 20.2   | 32.3   | 11.4   | 45.6   | 16.9   | 6.8    | 29.4   | 0.994277289 | 24.6     | 24.675   | 0.075   | 0.996960486 | 0.8036  | -1.134 |
| 93417_at   | 204.8  | 204.2  | 293.8  | 236.6  | 262.6  | 280.1  | 298.3  | 190.2  | 0.496552817 | 234.85   | 257.8    | 22.95   | 0.910977502 | 0.5188  | 1.094  |
| 93418_g_at | 29.9   | 55.4   | 51.9   | 41.3   | 73.8   | 57.4   | 48.2   | 46.2   | 0.216785336 | 44.625   | 56.4     | 11.775  | 0.791223404 | 0.213   | 1.277  |
| 93419_at   | 413.3  | 516.5  | 429.8  | 448.8  | 487.9  | 468.8  | 472.8  | 684.5  | 0.248792541 | 452.1    | 528.5    | 76.4    | 0.855439924 | 0.2052  | 1.158  |
| 93421_at   | 517.4  | 480.4  | 516.9  | 546.5  | 456.7  | 458.1  | 449.7  | 327.1  | 0.055774425 | 515.3    | 422.9    | 92.4    | 1.218491369 | 0.05475 | -1.229 |
| 93422_at   | 133.5  | 114.8  | 138.6  | 126.8  | 145.3  | 104.9  | 99.9   | 98.8   | 0.252594406 | 128.425  | 112.225  | 16.2    | 1.144352863 | 0.1957  | -1.157 |
| 93423_at   | 181.5  | 215.5  | 318.9  | 213.5  | 194.5  | 236.2  | 214.5  | 226.6  | 0.67139147  | 232.35   | 217.95   | 14.4    | 1.0660702   | 0.7405  | -1.045 |
| 93424_at   | 1096.7 | 1373.8 | 1237.8 | 1323.6 | 1385.4 | 1426.9 | 1349.7 | 1586.3 | 0.067464556 | 1257.975 | 1437.075 | 179.1   | 0.875371849 | 0.06878 | 1.144  |
| 93425_at   | 115.3  | 158.1  | 155.7  | 205.9  | 250.6  | 186    | 223.6  | 252.3  | 0.029374324 | 158.75   | 228.125  | 69.375  | 0.695890411 | 0.03468 | 1.456  |
| 93426_at   | 729.9  | 605.5  | 737.6  | 923    | 717.2  | 708.5  | 784.3  | 893.4  | 0.744620906 | 749      | 775.85   | 26.85   | 0.965392795 | 0.6931  | -1.043 |
| 93427_at   | 142    | 233.2  | 158.1  | 157.8  | 172.2  | 221.7  | 229.2  | 168.4  | 0.373783901 | 172.775  | 197.875  | 25.1    | 0.873152243 | 0.329   | 1.156  |
| 93428_at   | 75.8   | 78.8   | 107.5  | 158.1  | 133.6  | 127.4  | 136.3  | 99.9   | 0.406171784 | 105.05   | 124.3    | 19.25   | 0.845132743 | 0.3076  | 1.229  |
| 93429_at   | 10.8   | 11.2   | 24.9   | 6.3    | 23.9   | 7.3    | 8.9    | 76.8   | 0.40571957  | 13.3     | 29.225   | 15.925  | 0.45508982  | 0.477   | 1.585  |
| 93430_at   | 357.5  | 264.9  | 284.2  | 326    | 318.1  | 425.5  | 387.3  | 306.5  | 0.200092109 | 308.15   | 359.35   | 51.2    | 0.857520523 | 0.1943  | 1.163  |
| 93431_at   | 187.1  | 200.1  | 278.9  | 284.8  | 260.3  | 287.6  | 346.4  | 316.6  | 0.090379257 | 237.725  | 302.725  | 65      | 0.785283673 | 0.08985 | 1.289  |
| 93432_at   | 67.8   | 112.6  | 132.4  | 135.1  | 118.3  | 126.1  | 142.3  | 118.1  | 0.441331044 | 111.975  | 126.2    | 14.225  | 0.887282092 | 0.3982  | 1.163  |
| 93433_s_at | 8.7    | 13     | 12.1   | 6.4    | 15.1   | 8      | 6.6    | 10.6   | 0.992087208 | 10.05    | 10.075   | 0.025   | 0.99751861  | 0.9733  | -1.009 |
| 93434_at   | 167.2  | 196.2  | 204.1  | 200.1  | 235.8  | 195.1  | 204.7  | 291.6  | 0.16438335  | 191.9    | 231.8    | 39.9    | 0.827868852 | 0.1265  | 1.196  |
| 93435_at   | 4.5    | 28.6   | 5.9    | 18.7   | 24.5   | 6      | 21.1   | 22.7   | 0.58249005  | 14.425   | 18.575   | 4.15    | 0.776581427 | 0.4988  | 1.491  |
| 93436_i_at | 138.9  | 142.5  | 105.7  | 166.4  | 168.3  | 159    | 129.3  | 124.7  | 0.688587757 | 138.375  | 145.325  | 6.95    | 0.952176157 | 0.6716  | -1.055 |
| 93437_f_at | 341    | 336.8  | 317.3  | 305.4  | 392.9  | 359.1  | 416.7  | 285.7  | 0.274139644 | 325.125  | 363.6    | 38.475  | 0.894183168 | 0.2812  | 1.108  |
| 93439_f_at | 217.1  | 268    | 186    | 194.4  | 156.9  | 197.3  | 146.9  | 164.6  | 0.068275663 | 216.375  | 166.425  | 49.95   | 1.300135196 | 0.04634 | -1.295 |
| 93440_at   | 828.6  | 763.1  | 826.5  | 778    | 880.1  | 947.6  | 789.6  | 919.2  | 0.08494768  | 799.05   | 884.125  | 85.075  | 0.903774919 | 0.06959 | -1.105 |
| 93441_at   | 446.9  | 438.2  | 510.7  | 580.7  | 374    | 401.2  | 454.5  | 429    | 0.092416615 | 494.125  | 414.675  | 79.45   | 1.191595828 | 0.07004 | -1.187 |
| 93442_at   | 171    | 248.8  | 197.3  | 231.8  | 149.4  | 233.5  | 205.8  | 183.5  | 0.470439923 | 212.225  | 193.05   | 19.175  | 1.099326599 | 0.471   | -1.102 |
| 93443_at   | 166.1  | 144.9  | 103.2  | 149.4  | 124.8  | 160.4  | 155.2  | 184.4  | 0.431316406 | 140.9    | 156.2    | 15.3    | 0.902048656 | 0.44    | 1.114  |
| 93444_at   | 13.7   | 31.9   | 36.8   | 42.2   | 21.9   | 39.3   | 31.8   | 35.6   | 0.895458289 | 31.15    | 32.15    | 1       | 0.968895801 | 0.758   | -1.095 |
| 93445_at   | 11.7   | 31.4   | 28.9   | 13     | 23     | 26.9   | 10     | 14.9   | 0.706675094 | 21.25    | 18.7     | 2.55    | 1.136363636 | 0.776   | -1.107 |
| 93446_at   | 143.6  | 59.5   | 86.9   | 138.4  | 86.8   | 113.4  | 55.2   | 81     | 0.376329671 | 107.1    | 84.1     | 23      | 1.273483948 | 0.4404  | -1.236 |
| 93447_at   | 156    | 167.8  | 177.9  | 144.3  | 116.8  | 130    | 148.4  | 192.3  | 0.460870016 | 161.5    | 146.875  | 14.625  | 1.099574468 | 0.3841  | -1.116 |
| 93448_at   | 84.6   | 141.1  | 157.2  | 121.7  | 103.3  | 127.1  | 181.9  | 118.5  | 0.787140857 | 126.15   | 132.7    | 6.55    | 0.950640543 | 0.7772  | -1.055 |
| 93449_at   | 59.3   | 52.8   | 85.4   | 88.5   | 101.7  | 16.2   | 52.4   | 94.9   | 0.823489946 | 71.5     | 66.3     | 5.2     | 1.078431373 | 0.5722  | -1.304 |
| 93450_at   | 5.6    | 25.8   | 24.3   | 2.6    | 28.2   | 24.4   | 34.1   | 31.6   | 0.085501102 | 14.575   | 29.575   | 15      | 0.492814877 | 0.1025  | 3.014  |
| 93451_at   | 232.7  | 277.5  | 195.3  | 233.5  | 225.5  | 251.3  | 231.2  | 285.1  | 0.554172853 | 234.75   | 248.275  | 13.525  | 0.945524116 | 0.529   | -1.061 |
| 93452_at   | 6.4    | 36     | 23.3   | 35.8   | 9.9    | 29     | 11.6   | 36.1   | 0.709216662 | 25.375   | 21.65    | 3.725   | 1.172055427 | 0.8314  | -1.123 |
| 93453_at   | 23.9   | 34.1   | 21.4   | 9.7    | 28.2   | 28.9   | 46.8   | 37.7   | 0.09675146  | 22.275   | 35.4     | 13.125  | 0.629237288 | 0.1158  | 1.708  |
| 93454_at   | 430.5  | 403.1  | 390    | 424    | 346.7  | 457    | 398.9  | 455.2  | 0.931894019 | 411.9    | 414.45   | 2.55    | 0.993847267 | 0.9923  | -1.001 |
| 93455_s_at | 238.2  | 236.2  | 257.6  | 312.1  | 239.9  | 365.4  | 323.2  | 369    | 0.13039969  | 261.025  | 324.375  | 63.35   | 0.804701349 | 0.1301  | 1.233  |
| 93456_r_at | 86.8   | 113.7  | 78.7   | 113.5  | 190.5  | 157    | 107.5  | 178.7  | 0.037657659 | 98.175   | 158.425  | 60.25   | 0.619693861 | 0.02567 | 1.597  |
| 93457_at   | 2.1    | 3.2    | 6.1    | 5.9    | 6.8    | 3.4    | 6.6    | 4.4    | 0.481678905 | 4.325    | 5.3      | 0.975   | 0.816037736 | 0.4389  | 1.29   |
| 93458_at   | 23.4   | 26.6   | 24     | 16.3   | 16.1   | 30     | 21.3   | 19.4   | 0.821402411 | 22.575   | 21.7     | 0.875   | 1.040322581 | 0.7775  | -1.051 |
| 93459_s_at | 444.1  | 413.2  | 513.5  | 645.4  | 597.8  | 559.4  | 596.3  | 913.8  | 0.155792416 | 504.05   | 666.825  | 162.775 | 0.755895475 | 0.1167  | 1.316  |
| 93460_at   | 62.2   | 63.9   | 78.6   | 53.2   | 47.3   | 86.6   | 80.3   | 58.1   | 0.749275882 | 64.475   | 68.075   | 3.6     | 0.94711715  | 0.8376  | -1.035 |
| 93461_at   | 5.6    | 2.1    | 14.2   | 11.2   | 5.7    | 7.4    | 4.2    | 2.5    | 0.319927546 | 8.275    | 4.95     | 3.325   | 1.671717172 | 0.4834  | -1.437 |
| 93462_at   | 3.2    | 6.6    | 2.6    | 10.5   | 1.6    | 9.5    | 12.3   | 5.7    | 0.619455048 | 5.725    | 7.275    | 1.55    | 0.786941581 | 0.7931  | 1.164  |
| 93463_at   | 237.5  | 257.1  | 221.4  | 356.2  | 167.4  | 307.4  | 138.9  | 148.6  | 0.173135478 | 268.05   | 190.575  | 77.475  | 1.406532861 | 0.1218  | -1.459 |
| 93464_at   | 175.1  | 74.4   | 116.1  | 262.2  | 110.3  | 164.6  | 102.8  | 320.4  | 0.796004136 | 156.95   | 174.525  | 17.575  | 0.899298095 | 0.7938  | -1.108 |
| 93465_at   | 286.1  | 263.7  | 315.5  | 281.5  | 353.3  | 279.1  | 330.5  | 344    | 0.096698616 | 286.7    | 326.725  | 40.025  | 0.877496365 | 0.09381 | 1.137  |
| 93466_at   | 625.4  | 509.7  | 669.9  | 598.6  | 432.2  | 632.7  | 497.3  | 586.1  | 0.302033568 | 600.9    | 537.075  | 63.825  | 1.118838151 | 0.2954  | -1.125 |
| 93467_at   | 372.9  | 417.7  | 369.7  | 388.6  | 342    | 334.4  | 349.9  | 423.8  | 0.343753663 | 387.225  | 362.525  | 24.7    | 1.068133232 | 0.2998  | -1.072 |
| 93468_at   | 79.6   | 82     | 36.5   | 83.9   | 25.9   | 22.1   | 10.8   | 56.9   | 0.03341432  | 70.5     | 28.925   | 41.575  | 2.437337943 | 0.04339 | -2.746 |
| 93469_at   | 20.2   | 25     | 36.5   | 25.4   | 32.8   | 28.8   | 39.3   | 30.5   | 0.200361873 | 26.775   | 32.85    | 6.075   | 0.815068493 | 0.1675  | 1.246  |



|            |        |        |        |        |        |        |        |        |             |          |          |         |             |          |        |
|------------|--------|--------|--------|--------|--------|--------|--------|--------|-------------|----------|----------|---------|-------------|----------|--------|
| 93470_at   | 287.8  | 287.4  | 337.2  | 303.6  | 201.7  | 249.8  | 242.8  | 212.6  | 0.003359575 | 304      | 226.725  | 77.275  | 1.340831404 | 0.003571 | -1.343 |
| 93471_at   | 881.6  | 880.7  | 830.9  | 1071   | 553.8  | 1146.7 | 974.3  | 991.4  | 0.997274047 | 916.05   | 916.55   | 0.5     | 0.999454476 | 0.8667   | -1.03  |
| 93472_at   | 1012.9 | 1617.8 | 1374.7 | 1414.1 | 982.5  | 1661.9 | 1332.4 | 1767.2 | 0.723193373 | 1354.875 | 1436     | 81.125  | 0.943506267 | 0.786    | -1.048 |
| 93475_at   | 212.8  | 294    | 236.5  | 236.6  | 266.2  | 217.1  | 260.8  | 282.3  | 0.620019426 | 244.975  | 256.6    | 11.625  | 0.954696025 | 0.6015   | -1.05  |
| 93476_at   | 168.7  | 174.6  | 225.2  | 151.7  | 370.5  | 216.6  | 263.7  | 173.3  | 0.171763231 | 180.05   | 256.025  | 75.975  | 0.703251636 | 0.1254   | 1.382  |
| 93478_at   | 229.6  | 204.3  | 194    | 220    | 157.6  | 237    | 141    | 157.1  | 0.171220617 | 211.975  | 173.175  | 38.8    | 1.224050816 | 0.1164   | -1.247 |
| 93479_at   | 59.4   | 83.1   | 60.5   | 81     | 80.7   | 44.6   | 73     | 61.2   | 0.568569965 | 71       | 64.875   | 6.125   | 1.094412331 | 0.5431   | -1.108 |
| 93480_at   | 129.8  | 267.6  | 169.9  | 171.6  | 250.3  | 285.2  | 315.8  | 294.5  | 0.031773768 | 184.725  | 286.45   | 101.725 | 0.644876942 | 0.02451  | 1.6    |
| 93481_at   | 209.8  | 185.4  | 286.4  | 267.6  | 256.8  | 316.3  | 297.2  | 354.1  | 0.07087921  | 237.3    | 306.1    | 68.8    | 0.775236851 | 0.07456  | 1.301  |
| 93482_at   | 3439.5 | 3462.4 | 3714.9 | 3404.7 | 2184.4 | 3287.1 | 3026.3 | 2915   | 0.065100313 | 3505.375 | 2853.2   | 652.175 | 1.228576686 | 0.05496  | -1.242 |
| 93483_at   | 360    | 284.5  | 398.8  | 341.3  | 236.1  | 356.3  | 217.8  | 252.9  | 0.088631725 | 346.15   | 265.775  | 80.375  | 1.302417458 | 0.07722  | -1.317 |
| 93484_at   | 142.7  | 92.7   | 110.5  | 101.2  | 70.3   | 156.6  | 105.2  | 62.6   | 0.611977733 | 111.775  | 98.675   | 13.1    | 1.132759058 | 0.4636   | -1.196 |
| 93485_at   | 1088.7 | 1003.4 | 1168.6 | 1318.9 | 896.4  | 1053.2 | 1082.5 | 1101.4 | 0.227077799 | 1144.9   | 1033.375 | 111.525 | 1.107923068 | 0.2265   | -1.106 |
| 93486_at   | 144.7  | 308.4  | 359.7  | 136.1  | 259.7  | 376.8  | 357.3  | 190.3  | 0.445346664 | 237.225  | 296.025  | 58.8    | 0.801368128 | 0.3852   | 1.321  |
| 93488_at   | 1938.8 | 1159.4 | 1578.5 | 1649.8 | 1075.2 | 1537.1 | 1451.2 | 1521.9 | 0.381608057 | 1581.625 | 1396.35  | 185.275 | 1.132685215 | 0.4212   | -1.125 |
| 93489_at   | 6      | 5      | 2.8    | 4.3    | 11.2   | 8.1    | 5.8    | 7.2    | 0.045452004 | 4.525    | 8.075    | 3.55    | 0.560371517 | 0.03431  | 1.793  |
| 93490_at   | 1599.9 | 2284.9 | 1811.6 | 2054.8 | 1985.5 | 2118.4 | 2191.5 | 1602.4 | 0.859366974 | 1937.8   | 1974.45  | 36.65   | 0.981437869 | 0.8509   | -1.021 |
| 93491_f_at | 1359.7 | 1188.8 | 1303.3 | 1308.7 | 1270   | 1224.7 | 1214.8 | 1154.1 | 0.144545261 | 1290.125 | 1215.9   | 74.225  | 1.061045316 | 0.1412   | -1.06  |
| 93492_at   | 400    | 745.6  | 518.1  | 324.8  | 560    | 602.7  | 484.7  | 449.9  | 0.796145432 | 497.125  | 524.325  | 27.2    | 0.948123778 | 0.6344   | 1.1    |
| 93493_at   | 2171.7 | 2096.4 | 2193.9 | 2339.9 | 1864.4 | 2267.9 | 2397.4 | 2586   | 0.653997185 | 2200.475 | 2278.925 | 78.45   | 0.965575875 | 0.7105   | -1.029 |
| 93495_at   | 3496.1 | 3197.2 | 3184.3 | 3238   | 4220.4 | 3084.9 | 3676.4 | 3203.5 | 0.383687505 | 3278.9   | 3546.3   | 267.4   | 0.924597468 | 0.376    | -1.074 |
| 93496_at   | 5061.4 | 3865.3 | 4876.9 | 4340.8 | 3677.2 | 4105.7 | 4664   | 3850.5 | 0.232790084 | 4536.1   | 4074.35  | 461.75  | 1.113330961 | 0.2332   | -1.112 |
| 93497_at   | 457.1  | 352.8  | 287.4  | 321    | 365.9  | 399.3  | 298.4  | 647.4  | 0.432151877 | 354.575  | 427.75   | 73.175  | 0.82893045  | 0.4358   | 1.174  |
| 93498_s_at | 2260.7 | 2068.2 | 2401.5 | 2571.7 | 1262.7 | 2257.2 | 1997.6 | 2453.7 | 0.303286616 | 2325.525 | 1992.8   | 332.725 | 1.166963569 | 0.2865   | -1.199 |
| 93499_at   | 2890.1 | 2564.2 | 2566   | 2631.7 | 2809.4 | 2723.5 | 3012.5 | 2590   | 0.344338722 | 2663     | 2783.85  | 120.85  | 0.956588897 | 0.3389   | -1.045 |
| 93500_at   | 2224.2 | 2314.9 | 1708.1 | 1375   | 2578   | 2003.6 | 1941.4 | 2200.7 | 0.343508673 | 1905.55  | 2180.925 | 275.375 | 0.873734769 | 0.3162   | 1.162  |
| 93501_f_at | 1634.8 | 1243   | 1319.7 | 1214.4 | 1239.5 | 1479.1 | 1275.3 | 1202.9 | 0.658267353 | 1352.975 | 1299.2   | 53.775  | 1.041390856 | 0.6696   | -1.037 |
| 93502_r_at | 105.3  | 110.4  | 105.7  | 91.5   | 160.3  | 146.3  | 154.1  | 88.2   | 0.130763318 | 103.225  | 137.225  | 34      | 0.752231736 | 0.1235   | 1.298  |
| 93503_at   | 319.5  | 574.5  | 424.5  | 444.2  | 469.6  | 700.9  | 596.7  | 539.5  | 0.106540288 | 440.675  | 576.675  | 136     | 0.764165258 | 0.1055   | 1.323  |
| 93505_at   | 24     | 35.6   | 25.3   | 29.9   | 7.3    | 42.2   | 13     | 9.1    | 0.284187444 | 28.7     | 17.9     | 10.8    | 1.603351955 | 0.1236   | -2.047 |
| 93506_at   | 96     | 29.7   | 44.8   | 86.6   | 148.2  | 27.9   | 40.2   | 114.4  | 0.604329635 | 64.275   | 82.675   | 18.4    | 0.77744179  | 0.7922   | 1.144  |
| 93507_at   | 443.6  | 635.4  | 528    | 643.1  | 450.7  | 785    | 511.4  | 635.8  | 0.720797937 | 562.525  | 595.725  | 33.2    | 0.944269587 | 0.771    | -1.047 |
| 93509_at   | 1099.2 | 941.1  | 878.8  | 959.9  | 622.3  | 949.6  | 933.8  | 853.1  | 0.202434176 | 969.75   | 839.7    | 130.05  | 1.154876742 | 0.2059   | -1.167 |
| 93511_at   | 4851.2 | 4346.3 | 3930   | 4475.3 | 5958.8 | 5027.3 | 5532.2 | 4562.9 | 0.058868559 | 4400.7   | 5270.3   | 869.6   | 0.834999905 | 0.04925  | 1.195  |
| 93512_f_at | 2298.1 | 2644.8 | 1298.7 | 2459.4 | 2604.8 | 2413.6 | 2155.1 | 2285   | 0.584103057 | 2175.25  | 2364.625 | 189.375 | 0.919913305 | 0.5122   | -1.124 |
| 93513_at   | 58.7   | 32.3   | 36.9   | 24.4   | 80.3   | 53.7   | 23.3   | 24.6   | 0.65325072  | 38.075   | 45.475   | 7.4     | 0.837273227 | 0.8022   | 1.097  |
| 93514_at   | 4.6    | 13.2   | 5.3    | 6.1    | 5.8    | 1.9    | 4.6    | 2.3    | 0.167789723 | 7.3      | 3.65     | 3.65    | 2           | 0.09539  | -2.028 |
| 93515_at   | 57.5   | 49.5   | 14.5   | 60.4   | 40.3   | 44.8   | 46.2   | 108.6  | 0.487403659 | 45.475   | 59.975   | 14.5    | 0.758232597 | 0.4598   | 1.381  |
| 93516_at   | 53.3   | 57.6   | 78.9   | 100.5  | 67.7   | 72.2   | 44.3   | 102    | 0.951242766 | 72.575   | 71.55    | 1.025   | 1.014325646 | 0.9176   | -1.025 |
| 93517_at   | 2420.3 | 3975.1 | 3075.1 | 3516.9 | 2821.7 | 4035.1 | 3727.8 | 4048.5 | 0.385701137 | 3246.85  | 3658.275 | 411.425 | 0.887535792 | 0.393    | 1.134  |
| 93518_at   | 1289.7 | 1431.7 | 1368.1 | 1417.6 | 1158.3 | 1377.4 | 1520.9 | 1368.3 | 0.812597934 | 1376.775 | 1356.225 | 20.55   | 1.015152353 | 0.7676   | -1.019 |
| 93519_s_at | 2783.7 | 2327.4 | 2559.9 | 2475   | 2769   | 2336.3 | 2666.7 | 2142.7 | 0.752216989 | 2536.5   | 2478.675 | 57.825  | 1.023328996 | 0.7211   | -1.027 |
| 93520_at   | 76.6   | 68.7   | 97     | 126.6  | 89.2   | 124.9  | 133.4  | 163    | 0.127446009 | 92.225   | 127.625  | 35.4    | 0.722624878 | 0.1243   | 1.391  |
| 93521_at   | 933.2  | 1683.9 | 1234.3 | 1223.4 | 1369.1 | 1351.4 | 1543.6 | 1102.6 | 0.701806618 | 1268.7   | 1341.675 | 72.975  | 0.945609033 | 0.6299   | -1.073 |
| 93522_at   | 98.6   | 95.6   | 96     | 104    | 34.7   | 77.9   | 78.4   | 103.4  | 0.178285508 | 98.55    | 73.6     | 24.95   | 1.338994565 | 0.1746   | -1.439 |
| 93523_at   | 26.6   | 8.2    | 18.4   | 2.8    | 18.6   | 4.9    | 12.7   | 31.7   | 0.714361437 | 14       | 16.975   | 2.975   | 0.824742268 | 0.6585   | 1.342  |
| 93524_i_at | 7      | 33.1   | 66.6   | 5.9    | 49.2   | 42.3   | 9.4    | 32.6   | 0.767255551 | 28.15    | 33.375   | 5.225   | 0.843445693 | 0.5165   | 1.621  |
| 93525_f_at | 214    | 389.9  | 308.6  | 246    | 299.3  | 256.1  | 253.1  | 238.5  | 0.536237417 | 289.625  | 261.75   | 27.875  | 1.106494747 | 0.5953   | -1.082 |
| 93526_at   | 42.9   | 65.6   | 13.4   | 48.1   | 53.2   | 47     | 18.8   | 46.3   | 0.93270113  | 42.5     | 41.325   | 1.175   | 1.028433152 | 0.9159   | -1.048 |
| 93527_at   | 32.1   | 24.3   | 39.5   | 49.6   | 14.5   | 32.6   | 32.5   | 56.7   | 0.830486916 | 36.375   | 34.075   | 2.3     | 1.067498166 | 0.6743   | -1.151 |
| 93528_s_at | 410.9  | 367.9  | 358.1  | 518.9  | 354.2  | 470.4  | 432.2  | 635.2  | 0.435644403 | 413.95   | 473      | 59.05   | 0.875158562 | 0.4412   | 1.13   |
| 93529_at   | 1112.5 | 687.6  | 987.8  | 909.6  | 780.4  | 1063.1 | 730.8  | 993.8  | 0.797156799 | 924.375  | 892.025  | 32.35   | 1.0362658   | 0.818    | -1.033 |
| 93530_at   | 388.3  | 256.3  | 355    | 293    | 244.4  | 367.8  | 335.4  | 297.9  | 0.777763098 | 323.15   | 311.375  | 11.775  | 1.037816138 | 0.7908   | -1.036 |
| 93531_at   | 1714.8 | 1903.2 | 1765.4 | 1556.2 | 2244.2 | 1477.8 | 1702   | 1733.2 | 0.773565471 | 1734.9   | 1789.3   | 54.4    | 0.969597049 | 0.8288   | -1.022 |
| 93532_at   | 56.2   | 33.9   | 17.7   | 52     | 24.1   | 31     | 38.9   | 18.9   | 0.295063559 | 39.95    | 28.225   | 11.725  | 1.415411869 | 0.3817   | -1.337 |
| 93533_at   | 1050.8 | 849.2  | 911.2  | 940.6  | 1071.6 | 871.6  | 860.1  | 816.6  | 0.658846898 | 937.95   | 904.975  | 32.975  | 1.036437471 | 0.6247   | -1.039 |



|            |         |         |         |         |         |         |         |         |             |          |           |          |             |          |        |
|------------|---------|---------|---------|---------|---------|---------|---------|---------|-------------|----------|-----------|----------|-------------|----------|--------|
| 93534_at   | 11333.7 | 12047.6 | 11723.8 | 11833.3 | 18687   | 11923.6 | 14449.4 | 14057.1 | 0.120051008 | 11734.6  | 14779.275 | 3044.675 | 0.793990233 | 0.05919  | 1.243  |
| 93535_at   | 341.9   | 559.1   | 418.9   | 536.7   | 506.9   | 462.4   | 485.5   | 610.4   | 0.428052213 | 464.15   | 516.3     | 52.15    | 0.898992834 | 0.3912   | 1.128  |
| 93536_at   | 836.7   | 871.6   | 923.4   | 885.3   | 1069.3  | 1071.9  | 951.3   | 1022.6  | 0.006294093 | 879.25   | 1028.775  | 149.525  | 0.854657238 | 0.003971 | 1.169  |
| 93538_at   | 809.7   | 833.9   | 832.9   | 827.2   | 684.3   | 929.5   | 677.8   | 983.1   | 0.933792484 | 825.925  | 818.675   | 7.25     | 1.008855773 | 0.8213   | -1.024 |
| 93539_at   | 2415.7  | 1821.2  | 2135.1  | 1773.5  | 1896.4  | 2103    | 2276.5  | 1707.3  | 0.841630334 | 2036.375 | 1995.8    | 40.575   | 1.020330193 | 0.8566   | -1.018 |
| 93540_at   | 1159    | 1361.9  | 1359.5  | 1353.5  | 1612.1  | 1331.4  | 1375.5  | 1587.4  | 0.108824833 | 1308.475 | 1476.6    | 168.125  | 0.886140458 | 0.1062   | 1.127  |
| 93541_at   | 2987.3  | 2819.1  | 2897.3  | 2235.3  | 2102.4  | 2293.2  | 1954    | 2098.9  | 0.027778626 | 2734.75  | 2112.125  | 622.625  | 1.294786057 | 0.01388  | -1.289 |
| 93542_at   | 280     | 304.4   | 331.9   | 243.5   | 368.4   | 299.6   | 410.5   | 674.9   | 0.167515963 | 289.95   | 438.35    | 148.4    | 0.661457739 | 0.09007  | 1.452  |
| 93543_f_at | 16309.3 | 15330   | 17427.5 | 15053.4 | 19069.5 | 15157.4 | 18867.4 | 15679.5 | 0.367674807 | 16030.05 | 17193.45  | 1163.4   | 0.932334697 | 0.3726   | -1.069 |
| 93546_s_at | 4331.8  | 4397.4  | 4815.6  | 4693    | 3765.4  | 3826.4  | 4449.9  | 4593.5  | 0.162546123 | 4559.45  | 4158.8    | 400.65   | 1.096337886 | 0.1469   | -1.1   |
| 93547_at   | 4151.2  | 3945.3  | 4350.1  | 4227.7  | 3638.9  | 3825    | 3985.5  | 3789.4  | 0.018490994 | 4168.575 | 3809.7    | 358.875  | 1.094200331 | 0.0177   | -1.094 |
| 93548_at   | 3700.1  | 3141.7  | 3503.8  | 2337    | 4391.5  | 3315.7  | 3394.2  | 2293.9  | 0.746541084 | 3170.65  | 3348.825  | 178.175  | 0.946794771 | 0.804    | -1.045 |
| 93550_at   | 2295.6  | 2194.5  | 2380.5  | 1946.6  | 1479.3  | 1684.7  | 1657.6  | 1208.2  | 0.003113879 | 2204.3   | 1507.45   | 696.85   | 1.462270722 | 0.004708 | -1.471 |
| 93551_at   | 2544.7  | 2717    | 2029.3  | 2756.9  | 2438.5  | 2534.6  | 2258.8  | 2240.5  | 0.472645393 | 2511.975 | 2368.1    | 143.875  | 1.060755458 | 0.5158   | -1.055 |
| 93555_at   | 17.2    | 13.8    | 17.8    | 14.2    | 17.1    | 13.6    | 13      | 13.3    | 0.325329768 | 15.75    | 14.25     | 1.5      | 1.105263158 | 0.3209   | -1.103 |
| 93556_at   | 348.6   | 295.5   | 374.4   | 511.8   | 441.4   | 428.7   | 291.8   | 425     | 0.815850422 | 382.575  | 396.725   | 14.15    | 0.964332976 | 0.7848   | -1.044 |
| 93557_at   | 212.1   | 362.4   | 301.3   | 340.1   | 315.7   | 279.2   | 258.3   | 288.8   | 0.629080546 | 303.975  | 285.5     | 18.475   | 1.064711033 | 0.733    | -1.046 |
| 93558_at   | 70      | 108.1   | 73.2    | 100.7   | 80.5    | 112.8   | 104.7   | 81.4    | 0.607599055 | 88       | 94.85     | 6.85     | 0.927780706 | 0.5788   | -1.086 |
| 93559_at   | 2739.4  | 2521.2  | 2456.8  | 2765.8  | 2794.8  | 2640.7  | 2700    | 2677.3  | 0.382074051 | 2620.8   | 2703.2    | 82.4     | 0.969517609 | 0.3553   | -1.033 |
| 93560_at   | 1402.4  | 1101.5  | 1250.1  | 1153.2  | 1404.7  | 1187.4  | 1347.9  | 1122.7  | 0.692372535 | 1226.8   | 1265.675  | 38.875   | 0.969285164 | 0.6896   | -1.032 |
| 93561_at   | 216.4   | 255.4   | 287     | 197.4   | 344.6   | 265.7   | 200.6   | 195.5   | 0.768142789 | 239.05   | 251.6     | 12.55    | 0.950119237 | 0.8361   | -1.035 |
| 93562_at   | 2371.1  | 1581.5  | 1709.1  | 2051.6  | 996.1   | 1924.4  | 2130.9  | 898.8   | 0.280556327 | 1928.325 | 1487.55   | 440.775  | 1.296309368 | 0.2315   | -1.376 |
| 93563_s_at | 269.2   | 669.9   | 365.5   | 426     | 620.8   | 541.5   | 612.8   | 469.2   | 0.23719468  | 432.65   | 561.075   | 128.425  | 0.771109032 | 0.1747   | 1.362  |
| 93564_at   | 456.1   | 522     | 521.3   | 457.2   | 769.8   | 561.7   | 680.6   | 585.5   | 0.03633866  | 489.15   | 649.4     | 160.25   | 0.753233754 | 0.0146   | 1.32   |
| 93565_at   | 208.6   | 177.7   | 230.5   | 236.9   | 202.7   | 305     | 271.2   | 279     | 0.102900929 | 213.425  | 264.475   | 51.05    | 0.806976085 | 0.1052   | 1.233  |
| 93566_at   | 14.2    | 12.3    | 12.3    | 19.8    | 46.8    | 6.4     | 25.2    | 40.8    | 0.191766338 | 14.65    | 29.8      | 15.15    | 0.491610738 | 0.3311   | 1.64   |
| 93567_at   | 2221.5  | 2080.1  | 2077    | 1955.6  | 1983.8  | 2682.6  | 2234    | 2306.2  | 0.233701442 | 2083.55  | 2301.65   | 218.1    | 0.905241892 | 0.2092   | 1.099  |
| 93568_i_at | 268.9   | 304.8   | 297.4   | 243.1   | 277.1   | 461.2   | 335.3   | 407.1   | 0.103751616 | 278.55   | 370.175   | 91.625   | 0.752481934 | 0.07089  | 1.31   |
| 93569_f_at | 114.6   | 124.6   | 146.7   | 135.3   | 134.1   | 263.1   | 151.6   | 237.3   | 0.125421558 | 130.3    | 196.525   | 66.225   | 0.663019972 | 0.07434  | 1.454  |
| 93570_at   | 18.5    | 16.7    | 7.8     | 22.5    | 36      | 19.6    | 14.4    | 26.9    | 0.21929276  | 16.375   | 24.225    | 7.85     | 0.675954592 | 0.2327   | 1.501  |
| 93571_at   | 2433    | 2380.8  | 2715.9  | 3004.6  | 2499.8  | 2451.4  | 2820    | 3438.3  | 0.557411044 | 2633.575 | 2802.375  | 168.8    | 0.939765378 | 0.5675   | -1.059 |
| 93572_at   | 1517.5  | 1428.9  | 1582.9  | 1525.6  | 1312.4  | 1610.2  | 1362.5  | 1523.4  | 0.462317195 | 1513.725 | 1452.125  | 61.6     | 1.042420591 | 0.4284   | -1.045 |
| 93573_at   | 879.3   | 616.7   | 695     | 795.7   | 996.1   | 1735.5  | 1604.2  | 1709.7  | 0.016981038 | 746.675  | 1511.375  | 764.7    | 0.494036887 | 0.004083 | 1.994  |
| 93574_at   | 2068.1  | 1775.8  | 1287.5  | 1522.7  | 2949    | 2924.6  | 3068.1  | 2771.3  | 0.002583412 | 1663.525 | 2928.25   | 1264.725 | 0.568095279 | 0.001398 | 1.786  |
| 93575_at   | 436.7   | 373     | 461.2   | 429.4   | 433.6   | 462.5   | 484.2   | 622.9   | 0.17232289  | 425.075  | 500.8     | 75.725   | 0.848791933 | 0.1358   | 1.17   |
| 93578_at   | 36.4    | 31.8    | 37.9    | 34.9    | 58.5    | 30.6    | 34.4    | 43.3    | 0.378064565 | 35.25    | 41.7      | 6.45     | 0.845323741 | 0.3862   | 1.148  |
| 93579_at   | 1262.8  | 1093    | 1491.9  | 1298.4  | 1655.2  | 1098.7  | 1335.5  | 1101.3  | 0.945378335 | 1286.525 | 1297.675  | 11.15    | 0.99140771  | 0.9995   | -1     |
| 93580_at   | 1949.2  | 1793.4  | 1916    | 1844.3  | 1521.2  | 1727    | 1575.8  | 1782.4  | 0.026813243 | 1875.725 | 1651.6    | 224.125  | 1.135701744 | 0.02166  | -1.137 |
| 93581_at   | 2322.1  | 3313.8  | 2817.7  | 2126.7  | 4582.4  | 2756.2  | 2939.6  | 2523.7  | 0.352160205 | 2645.075 | 3200.475  | 555.4    | 0.826463259 | 0.3263   | 1.194  |
| 93582_at   | 867.5   | 724     | 802     | 726.2   | 626.5   | 777.6   | 708     | 677.2   | 0.127569644 | 779.925  | 697.325   | 82.6     | 1.118452658 | 0.1236   | -1.119 |
| 93583_s_at | 188.1   | 120.4   | 193.8   | 158.2   | 153.9   | 193.1   | 207.6   | 227.9   | 0.232745485 | 165.125  | 195.625   | 30.5     | 0.844089457 | 0.2471   | 1.193  |
| 93584_at   | 61.4    | 38      | 76.2    | 56.1    | 68.7    | 70.3    | 53.2    | 64.2    | 0.51759009  | 57.925   | 64.1      | 6.175    | 0.903666147 | 0.4578   | 1.134  |
| 93585_at   | 40.3    | 73      | 32.6    | 57.6    | 83.6    | 29.3    | 58.7    | 30.2    | 0.979546122 | 50.875   | 50.45     | 0.425    | 1.008424182 | 0.8553   | -1.062 |
| 93586_at   | 718.4   | 589.5   | 843.8   | 764.9   | 596.2   | 655.8   | 677.8   | 593.9   | 0.163101947 | 729.15   | 630.925   | 98.225   | 1.155684115 | 0.1465   | -1.148 |
| 93587_at   | 174.6   | 189.3   | 156.2   | 227.5   | 275     | 304.4   | 287.1   | 261.8   | 0.003127273 | 186.9    | 282.075   | 95.175   | 0.662589737 | 0.002674 | 1.521  |
| 93588_at   | 1342.4  | 1330.5  | 1056.9  | 1179.6  | 1288.3  | 1118.3  | 1091.4  | 1266.8  | 0.684832189 | 1227.35  | 1191.2    | 36.15    | 1.030347549 | 0.7066   | -1.028 |
| 93589_at   | 881     | 939.2   | 915     | 915     | 1226.4  | 1082.7  | 1326.2  | 1178.5  | 0.008491276 | 912.55   | 1203.45   | 290.9    | 0.758278283 | 0.000809 | 1.316  |
| 93590_at   | 298.7   | 556.2   | 395.9   | 518     | 306.1   | 414.8   | 434.6   | 466.9   | 0.615822884 | 442.2    | 405.6     | 36.6     | 1.090236686 | 0.6944   | -1.072 |
| 93591_at   | 692.7   | 542.1   | 589.1   | 702.8   | 618.8   | 581.3   | 638.2   | 753.3   | 0.774349955 | 631.675  | 647.9     | 16.225   | 0.974957555 | 0.7622   | -1.027 |
| 93592_at   | 7.4     | 26.7    | 4.5     | 4.4     | 5       | 6.3     | 9.7     | 25.4    | 0.909109803 | 10.75    | 11.6      | 0.85     | 0.926724138 | 0.7711   | 1.184  |
| 93593_f_at | 4660.1  | 3682.6  | 4336.3  | 3725.2  | 4822.4  | 4123.7  | 4414.1  | 4152.7  | 0.378547548 | 4101.05  | 4378.225  | 277.175  | 0.936692381 | 0.3548   | -1.071 |
| 93594_r_at | 380     | 335.4   | 309.8   | 446.9   | 485.4   | 316.5   | 417.9   | 436.9   | 0.360439742 | 368.025  | 414.175   | 46.15    | 0.888573671 | 0.3763   | 1.123  |
| 93595_at   | 1750.5  | 1579.4  | 2043.7  | 1625.4  | 1647.7  | 2236.9  | 2142.1  | 1556.1  | 0.50063738  | 1749.75  | 1895.7    | 145.95   | 0.92300997  | 0.5262   | -1.075 |
| 93596_i_at | 2540    | 2915.1  | 2568.9  | 1836.8  | 5771.4  | 2216.5  | 3053.4  | 2154.3  | 0.404859536 | 2465.2   | 3298.9    | 833.7    | 0.747279396 | 0.412    | 1.246  |
| 93597_at   | 10      | 11.3    | 10      | 36.7    | 6.8     | 19.4    | 18.6    | 43.1    | 0.638695474 | 17       | 21.975    | 4.975    | 0.773606371 | 0.6489   | 1.266  |
| 93598_at   | 309.4   | 352.2   | 317.2   | 316     | 312.2   | 332.6   | 372.4   | 351.5   | 0.298010314 | 323.7    | 342.175   | 18.475   | 0.94600716  | 0.2952   | -1.056 |



|            |        |        |        |        |        |        |        |        |             |          |          |         |             |           |        |
|------------|--------|--------|--------|--------|--------|--------|--------|--------|-------------|----------|----------|---------|-------------|-----------|--------|
| 93599_at   | 1400.1 | 1249.1 | 1452.5 | 1823.5 | 1257.6 | 1340.1 | 1483.9 | 1774.3 | 0.92058276  | 1481.3   | 1463.975 | 17.325  | 1.011834218 | 0.9249    | -1.011 |
| 93600_at   | 1563.3 | 1370.3 | 1374.8 | 1750.8 | 1349.1 | 1388.7 | 1468.9 | 1130.2 | 0.172937057 | 1514.8   | 1334.225 | 180.575 | 1.135340741 | 0.172     | -1.135 |
| 93601_at   | 15     | 14     | 29.4   | 30     | 52.9   | 24.6   | 11     | 35.6   | 0.413526743 | 22.1     | 31.025   | 8.925   | 0.712328767 | 0.5467    | 1.286  |
| 93602_at   | 271.2  | 566.7  | 589.2  | 543.2  | 712.6  | 665.7  | 649.3  | 478.6  | 0.19441084  | 492.575  | 626.55   | 133.975 | 0.786170298 | 0.2287    | 1.316  |
| 93603_at   | 633.7  | 679.9  | 696.5  | 514.8  | 871.8  | 594.7  | 741.8  | 492.8  | 0.657248273 | 631.225  | 675.275  | 44.05   | 0.934767317 | 0.7325    | -1.052 |
| 93604_f_at | 1599.5 | 1690.2 | 1708   | 1760.9 | 743.2  | 820.6  | 814.7  | 956.7  | 9.00799E-06 | 1689.65  | 833.8    | 855.85  | 2.026445191 | 0.0000149 | -2.034 |
| 93605_r_at | 145.6  | 94.4   | 119.9  | 113.2  | 48.5   | 62.6   | 61.2   | 64.8   | 0.007660985 | 118.275  | 59.275   | 59      | 1.995360607 | 0.000828  | -1.984 |
| 93606_s_at | 510.1  | 417.8  | 529.4  | 452.2  | 235.1  | 353.2  | 333.8  | 338.7  | 0.004875573 | 477.375  | 315.2    | 162.175 | 1.514514594 | 0.008138  | -1.527 |
| 93608_at   | 112.2  | 130.8  | 125.1  | 113.8  | 121.8  | 98.1   | 64.1   | 167.5  | 0.752778502 | 120.475  | 112.875  | 7.6     | 1.067331118 | 0.5728    | -1.13  |
| 93609_at   | 324.5  | 291    | 398.8  | 381.4  | 264.7  | 316    | 231.2  | 331.1  | 0.112961604 | 348.925  | 285.75   | 63.175  | 1.221084864 | 0.1167    | -1.224 |
| 93611_at   | 82.7   | 216.4  | 131    | 201.8  | 104.8  | 142.4  | 79.3   | 211.8  | 0.602086628 | 157.975  | 134.575  | 23.4    | 1.173880736 | 0.6229    | -1.172 |
| 93612_at   | 33.3   | 63.4   | 51.3   | 69.2   | 67.9   | 52     | 83.4   | 73.9   | 0.197617505 | 54.3     | 69.3     | 15      | 0.783549784 | 0.2129    | 1.305  |
| 93613_at   | 64.3   | 73.6   | 45.1   | 57.4   | 60.4   | 71.4   | 45.6   | 42     | 0.584151367 | 60.1     | 54.85    | 5.25    | 1.095715588 | 0.5627    | -1.104 |
| 93614_at   | 111    | 131.9  | 119.5  | 129    | 139.5  | 144    | 119.4  | 153.1  | 0.11532835  | 122.85   | 139      | 16.15   | 0.88381295  | 0.1154    | 1.129  |
| 93615_at   | 1192.1 | 1520.7 | 1427.3 | 1203.4 | 1934.4 | 1471.9 | 1770.8 | 1799.4 | 0.019261557 | 1335.875 | 1744.125 | 408.25  | 0.765928474 | 0.0194    | 1.306  |
| 93616_g_at | 695.6  | 824.7  | 668.7  | 527.2  | 646.9  | 824    | 619    | 839.9  | 0.548715881 | 679.05   | 732.45   | 53.4    | 0.927094    | 0.542     | -1.082 |
| 93617_at   | 131.8  | 78.5   | 98.4   | 99.2   | 169.1  | 154.9  | 88.8   | 106.5  | 0.265398988 | 101.975  | 129.825  | 27.85   | 0.785480454 | 0.2727    | 1.252  |
| 93618_at   | 37.5   | 51.5   | 86.7   | 101.6  | 53.3   | 109.3  | 43.5   | 77.9   | 0.938825793 | 69.325   | 71       | 1.675   | 0.976408451 | 0.9073    | -1.038 |
| 93619_at   | 126.8  | 294.1  | 154.5  | 162.3  | 207.3  | 212    | 162.8  | 222.9  | 0.694334075 | 184.425  | 201.25   | 16.825  | 0.916397516 | 0.5178    | 1.143  |
| 93620_at   | 858.1  | 996.6  | 776.5  | 677.2  | 965.4  | 848.4  | 895.1  | 801    | 0.540224772 | 827.1    | 877.475  | 50.375  | 0.942590957 | 0.4898    | -1.069 |
| 93621_at   | 764.4  | 1303.9 | 900.1  | 1008.5 | 969.5  | 984.6  | 1080.9 | 1096.9 | 0.763713925 | 994.225  | 1032.975 | 38.75   | 0.962486991 | 0.6483    | -1.058 |
| 93622_at   | 466.7  | 345.7  | 455    | 406.2  | 508.5  | 381.4  | 427.5  | 440.4  | 0.600294278 | 418.4    | 439.45   | 21.05   | 0.952099215 | 0.5956    | -1.052 |
| 93623_at   | 197.5  | 153.4  | 133.1  | 255.3  | 119.8  | 190    | 101.9  | 142.4  | 0.216726628 | 184.825  | 138.525  | 46.3    | 1.334235698 | 0.1967    | -1.329 |
| 93624_at   | 78.9   | 38.9   | 108.7  | 69.8   | 93.3   | 65.1   | 107.1  | 122.1  | 0.271542155 | 74.075   | 96.9     | 22.825  | 0.764447884 | 0.2723    | 1.359  |
| 93625_at   | 20.9   | 31.2   | 61.3   | 43.5   | 27.3   | 22.7   | 30.4   | 25.2   | 0.236976992 | 39.225   | 26.4     | 12.825  | 1.485795455 | 0.2214    | -1.384 |
| 93626_at   | 708    | 550.5  | 526.8  | 744.6  | 482.2  | 539.8  | 531.3  | 834.3  | 0.728355967 | 632.475  | 596.9    | 35.575  | 1.059599598 | 0.6555    | -1.073 |
| 93627_at   | 362.6  | 464.3  | 477.6  | 404.7  | 533.3  | 492.4  | 551.3  | 414.5  | 0.132858497 | 427.3    | 497.875  | 70.575  | 0.858247552 | 0.1407    | 1.165  |
| 93628_at   | 4.7    | 4.9    | 24.1   | 4.5    | 4.9    | 16.3   | 3.8    | 3.6    | 0.692849169 | 9.55     | 7.15     | 2.4     | 1.335664336 | 0.7226    | -1.222 |
| 93629_s_at | 1.4    | 9.1    | 0.9    | 8.1    | 20.9   | 2      | 2      | 1.4    | 0.761371915 | 4.875    | 6.575    | 1.7     | 0.741444867 | 0.9563    | -1.05  |
| 93630_at   | 94.6   | 70.6   | 97.7   | 149    | 79.4   | 111.8  | 26.8   | 93.3   | 0.346506961 | 102.975  | 77.825   | 25.15   | 1.323160938 | 0.3395    | -1.447 |
| 93631_at   | 78.5   | 76     | 73.8   | 82.7   | 88     | 61.4   | 61.8   | 98.2   | 0.968942035 | 77.75    | 77.35    | 0.4     | 1.005171299 | 0.8384    | -1.027 |
| 93632_g_at | 357.3  | 238.4  | 224.2  | 353    | 211.1  | 337.5  | 185.9  | 347.4  | 0.69478115  | 293.225  | 270.475  | 22.75   | 1.084111286 | 0.6546    | -1.1   |
| 93633_at   | 206.5  | 224.5  | 152.5  | 170.8  | 204.7  | 156.1  | 217.6  | 141.9  | 0.741870794 | 188.575  | 180.075  | 8.5     | 1.047202554 | 0.7229    | -1.052 |
| 93634_at   | 739.2  | 726.1  | 791.2  | 768.8  | 448    | 835.9  | 591.2  | 497.2  | 0.153737324 | 756.325  | 593.075  | 163.25  | 1.275260296 | 0.09649   | -1.312 |
| 93635_at   | 118.4  | 158.5  | 133    | 153.9  | 114.9  | 141.2  | 102.6  | 194.1  | 0.907695872 | 140.95   | 138.2    | 2.75    | 1.019898698 | 0.7897    | -1.044 |
| 93636_at   | 282.4  | 310.4  | 289.7  | 348.4  | 310.7  | 276.3  | 353.7  | 354.7  | 0.527828817 | 307.725  | 323.85   | 16.125  | 0.95020843  | 0.5419    | -1.05  |
| 93637_at   | 4.1    | 32.1   | 8.1    | 16     | 67.6   | 48.7   | 45.6   | 32     | 0.013744655 | 15.075   | 48.475   | 33.4    | 0.310985044 | 0.02386   | 4.09   |
| 93638_s_at | 2      | 1.5    | 1.5    | 1.9    | 1.9    | 3.4    | 1.7    | 2.5    | 0.188266801 | 1.725    | 2.375    | 0.65    | 0.726315789 | 0.1321    | 1.352  |
| 93639_r_at | 23     | 95.5   | 100.9  | 140.8  | 59.8   | 109.9  | 98.4   | 83     | 0.936337533 | 90.05    | 87.775   | 2.275   | 1.025918542 | 0.7603    | 1.145  |
| 93640_s_at | 0.8    | 6.6    | 8.4    | 5.4    | 2.7    | 0.7    | 3.2    | 4.6    | 0.233549058 | 5.3      | 2.8      | 2.5     | 1.892857143 | 0.4451    | -1.738 |
| 93642_at   | 24.7   | 43.3   | 42.6   | 27.2   | 56.6   | 103.2  | 44.5   | 33.1   | 0.205612193 | 34.45    | 59.35    | 24.9    | 0.580454928 | 0.1376    | 1.624  |
| 93643_at   | 258.6  | 325.9  | 269.1  | 215    | 278.3  | 382    | 276.9  | 290.1  | 0.288200166 | 267.15   | 306.825  | 39.675  | 0.870691762 | 0.2681    | 1.15   |
| 93644_at   | 47.1   | 51.5   | 33.7   | 66.5   | 26     | 46.4   | 31     | 42.9   | 0.170271727 | 49.7     | 36.575   | 13.125  | 1.358851675 | 0.1695    | -1.357 |
| 93645_at   | 35     | 33.3   | 56.5   | 39.7   | 30.9   | 55.2   | 46.5   | 64.6   | 0.397092131 | 41.125   | 49.3     | 8.175   | 0.834178499 | 0.4303    | 1.183  |
| 93646_at   | 113.8  | 96.5   | 109.7  | 126.6  | 85.7   | 106.7  | 82.3   | 83.4   | 0.040187909 | 111.65   | 89.525   | 22.125  | 1.247137671 | 0.03642   | -1.249 |
| 93647_at   | 71.4   | 85     | 44.1   | 93     | 25.8   | 70.3   | 73.6   | 52.3   | 0.287880874 | 73.375   | 55.5     | 17.875  | 1.322072072 | 0.3199    | -1.375 |
| 93648_at   | 73.6   | 141.3  | 187.3  | 158    | 106.4  | 153.7  | 112.2  | 118.9  | 0.547240675 | 140.05   | 122.8    | 17.25   | 1.140472313 | 0.7089    | -1.09  |
| 93649_f_at | 14.6   | 15.4   | 16     | 17.2   | 17.9   | 15.8   | 18.2   | 17.6   | 0.086326718 | 15.8     | 17.375   | 1.575   | 0.909352518 | 0.08698   | -1.1   |
| 93650_i_at | 55.6   | 51.6   | 169.7  | 46.9   | 59.5   | 202.5  | 415.8  | 53.3   | 0.325503215 | 80.95    | 182.775  | 101.825 | 0.442894269 | 0.3305    | 1.849  |
| 93651_r_at | 125.4  | 84.9   | 90.9   | 251.8  | 171.6  | 205.2  | 354.8  | 278    | 0.089094875 | 138.25   | 252.4    | 114.15  | 0.54774168  | 0.06612   | 1.943  |
| 93652_i_at | 48.5   | 12.7   | 17     | 41.5   | 13.6   | 31.1   | 10.1   | 15.3   | 0.275693615 | 29.925   | 17.525   | 12.4    | 1.707560628 | 0.2889    | -1.604 |
| 93653_r_at | 56.1   | 9.4    | 42.6   | 56.6   | 65.9   | 22.6   | 47.8   | 25     | 0.956910747 | 41.175   | 40.325   | 0.85    | 1.021078735 | 0.873     | -1.087 |
| 93654_at   | 9.8    | 21.6   | 6.3    | 13.2   | 36.5   | 38.9   | 45.2   | 7.2    | 0.103334624 | 12.725   | 31.95    | 19.225  | 0.39827856  | 0.1569    | 2.256  |
| 93655_at   | 237.7  | 259.5  | 224.6  | 329.4  | 432.1  | 233.2  | 221.1  | 223.9  | 0.806447991 | 262.8    | 277.575  | 14.775  | 0.946771143 | 0.9071    | -1.023 |
| 93656_g_at | 195.3  | 180.9  | 157.6  | 232.5  | 232    | 198    | 159.8  | 227    | 0.600444476 | 191.575  | 204.2    | 12.625  | 0.938173359 | 0.6114    | -1.065 |
| 93657_at   | 20.3   | 29.9   | 22.1   | 28.9   | 27.6   | 29.7   | 42.3   | 39.7   | 0.078163158 | 25.3     | 34.825   | 9.525   | 0.726489591 | 0.06804   | 1.373  |



|            |        |       |        |        |        |        |        |        |             |         |         |         |             |           |        |
|------------|--------|-------|--------|--------|--------|--------|--------|--------|-------------|---------|---------|---------|-------------|-----------|--------|
| 93658_at   | 5.5    | 10.7  | 7      | 5.9    | 1.6    | 17.9   | 3      | 7.8    | 0.942376556 | 7.275   | 7.575   | 0.3     | 0.96039604  | 0.5803    | -1.383 |
| 93659_at   | 3.1    | 1.2   | 1.6    | 2.2    | 6.3    | 3.1    | 1.5    | 1.1    | 0.482623297 | 2.025   | 3       | 0.975   | 0.675       | 0.6234    | 1.258  |
| 93660_at   | 6.6    | 5.6   | 13     | 6.8    | 10.1   | 15.9   | 15.8   | 17.9   | 0.027019019 |         | 8       | 14.925  | 6.925       | 0.5360134 | 1.933  |
| 93661_at   | 8.3    | 35.5  | 13.9   | 6.2    | 34.3   | 6.4    | 12.3   | 37.6   | 0.541044869 | 15.975  | 22.65   | 6.675   | 0.705298013 | 0.5684    | 1.413  |
| 93662_s_at | 70.9   | 60.1  | 139.4  | 56.9   | 99.1   | 189.5  | 119.1  | 161.7  | 0.075530461 | 81.825  | 142.35  | 60.525  | 0.574815595 | 0.05758   | 1.809  |
| 93663_r_at | 68.3   | 60.3  | 79.3   | 47.2   | 84.2   | 67.1   | 83.9   | 83.4   | 0.102312997 | 63.775  | 79.65   | 15.875  | 0.800690521 | 0.1036    | 1.266  |
| 93664_at   | 431.6  | 532   | 433.1  | 418.3  | 287.7  | 478.2  | 302.5  | 289.6  | 0.087790106 | 453.75  | 339.5   | 114.25  | 1.3365243   | 0.06106   | -1.363 |
| 93665_at   | 10.3   | 43.5  | 67.2   | 49.1   | 73.9   | 56.3   | 30.9   | 63.3   | 0.402122374 | 42.525  | 56.1    | 13.575  | 0.75802139  | 0.3876    | 1.534  |
| 93666_at   | 208.4  | 163.3 | 168.6  | 172    | 194.6  | 204.1  | 187    | 221.1  | 0.11557581  | 178.075 | 201.7   | 23.625  | 0.8828706   | 0.1013    | 1.136  |
| 93667_at   | 218.8  | 256.5 | 200.1  | 228    | 177.7  | 221.7  | 187.2  | 209.2  | 0.133753746 | 225.85  | 198.95  | 26.9    | 1.135209852 | 0.1298    | -1.135 |
| 93668_at   | 18.6   | 22.3  | 20.9   | 14.6   | 29.1   | 19.7   | 15.9   | 19.1   | 0.600140655 | 19.1    | 20.95   | 1.85    | 0.911694511 | 0.6277    | -1.084 |
| 93669_f_at | 57.1   | 58.4  | 47.7   | 61     | 71.2   | 53.2   | 37.9   | 91.2   | 0.576070026 | 56.05   | 63.375  | 7.325   | 0.884418146 | 0.7175    | -1.078 |
| 93670_at   | 283.5  | 555.4 | 438.8  | 446.7  | 552.9  | 377.6  | 541.6  | 392.7  | 0.648280885 | 431.1   | 466.2   | 35.1    | 0.924710425 | 0.62      | 1.095  |
| 93671_at   | 21.2   | 27.2  | 24.1   | 24.1   | 18     | 17.3   | 20.8   | 17.8   | 0.010940858 | 24.15   | 18.475  | 5.675   | 1.307171854 | 0.006763  | -1.307 |
| 93672_at   | 107.3  | 73.3  | 83.4   | 100.7  | 96.6   | 95.8   | 76.6   | 107.5  | 0.780547866 | 91.175  | 94.125  | 2.95    | 0.968658699 | 0.7618    | -1.036 |
| 93673_at   | 289.3  | 265.3 | 349.7  | 253.9  | 477.2  | 270.9  | 300.9  | 316.5  | 0.363729319 | 289.55  | 341.375 | 51.825  | 0.848187477 | 0.3408    | 1.159  |
| 93674_at   | 178.9  | 382   | 280.5  | 300.8  | 291.5  | 259    | 297.9  | 217.6  | 0.69720426  | 285.55  | 266.5   | 19.05   | 1.071482176 | 0.8215    | -1.042 |
| 93675_at   | 47.2   | 29.8  | 13.1   | 55.1   | 52     | 73.2   | 61.2   | 64.7   | 0.05901146  | 36.3    | 62.775  | 26.475  | 0.578255675 | 0.08727   | 1.96   |
| 93676_at   | 1063.2 | 968.6 | 971.7  | 860.7  | 774.5  | 858.1  | 787    | 727.6  | 0.014312946 | 966.05  | 786.8   | 179.25  | 1.227821556 | 0.009999  | -1.227 |
| 93677_at   | 47.2   | 29.1  | 17.4   | 41.2   | 23.9   | 44.8   | 19.4   | 50.2   | 0.935564873 | 33.725  | 34.575  | 0.85    | 0.975415763 | 0.967     | -1.014 |
| 93678_s_at | 1.6    | 17.4  | 16.3   | 15.7   | 26.9   | 3.7    | 9.9    | 17.1   | 0.800623006 | 12.75   | 14.4    | 1.65    | 0.885416667 | 0.7762    | 1.239  |
| 93679_at   | 12     | 43    | 37.9   | 54.3   | 13.1   | 33.3   | 26.7   | 14.9   | 0.210016479 | 36.8    | 22      | 14.8    | 1.672727273 | 0.3039    | -1.575 |
| 93680_at   | 392    | 516.6 | 463.7  | 576.1  | 408.1  | 387.8  | 380.7  | 393.7  | 0.093186283 | 487.1   | 392.575 | 94.525  | 1.240782016 | 0.04837   | -1.229 |
| 93681_at   | 700.6  | 920.8 | 745    | 673.8  | 1049.4 | 990.8  | 958.3  | 967.8  | 0.019182118 | 760.05  | 991.575 | 231.525 | 0.766507828 | 0.009368  | 1.314  |
| 93682_at   | 1050.7 | 1281  | 793.2  | 793.6  | 1144.1 | 1143.4 | 1001.5 | 1271.2 | 0.279711915 | 979.625 | 1140.05 | 160.425 | 0.859282488 | 0.2307    | 1.184  |
| 93683_at   | 14.4   | 2.4   | 4.5    | 11.5   | 1.5    | 4.9    | 3.1    | 10.1   | 0.374455575 | 8.2     | 4.9     | 3.3     | 1.673469388 | 0.4089    | -1.677 |
| 93685_at   | 18.6   | 18.5  | 25.9   | 8.9    | 12.3   | 21.8   | 17.6   | 34.6   | 0.565916857 | 17.975  | 21.575  | 3.6     | 0.833140209 | 0.5835    | 1.199  |
| 93686_s_at | 14.5   | 23.1  | 32.1   | 27.5   | 3.4    | 26.8   | 34.6   | 1.7    | 0.444404366 | 24.3    | 16.625  | 7.675   | 1.461654135 | 0.2392    | -2.735 |
| 93687_r_at | 23.4   | 17.1  | 26     | 16.5   | 23     | 15.7   | 23.3   | 10.9   | 0.533944251 | 20.75   | 18.225  | 2.525   | 1.138545953 | 0.4924    | -1.169 |
| 93688_at   | 2.2    | 3.2   | 2.5    | 3.4    | 5.6    | 3.3    | 3.5    | 2.4    | 0.298828707 | 2.825   | 3.7     | 0.875   | 0.763513514 | 0.297     | 1.263  |
| 93689_at   | 277.1  | 283.5 | 260.6  | 258.3  | 263.3  | 251.9  | 285    | 271.1  | 0.832923821 | 269.875 | 267.825 | 2.05    | 1.007654252 | 0.8275    | -1.008 |
| 93690_at   | 667.9  | 604   | 780.7  | 692    | 560    | 922.5  | 423.1  | 568.1  | 0.583017421 | 686.15  | 618.425 | 67.725  | 1.109512067 | 0.4404    | -1.151 |
| 93691_s_at | 995    | 657.4 | 1159.6 | 855.8  | 793.5  | 1118.6 | 479.5  | 544.3  | 0.351645653 | 916.95  | 733.975 | 182.975 | 1.249293232 | 0.2992    | -1.294 |
| 93692_f_at | 29.4   | 17.5  | 12.8   | 15     | 32.8   | 33.3   | 16.6   | 23.6   | 0.197835111 | 18.675  | 26.575  | 7.9     | 0.702728128 | 0.1841    | 1.442  |
| 93693_at   | 640.2  | 942.9 | 692    | 808.6  | 728.2  | 737.3  | 633.9  | 833.7  | 0.652745807 | 770.925 | 733.275 | 37.65   | 1.051344993 | 0.6855    | -1.045 |
| 93694_at   | 28.6   | 65.5  | 43.7   | 46     | 24.4   | 44.5   | 31.4   | 69.3   | 0.785823911 | 45.95   | 42.4    | 3.55    | 1.083726415 | 0.6952    | -1.123 |
| 93695_at   | 284.7  | 252.2 | 325    | 359.9  | 303.4  | 311.5  | 352.9  | 375.2  | 0.34015929  | 305.45  | 335.75  | 30.3    | 0.909754281 | 0.3226    | -1.105 |
| 93696_at   | 16.1   | 26.9  | 67.9   | 13     | 12.3   | 19.2   | 10.4   | 18.1   | 0.297593898 | 30.975  | 15      | 15.975  | 2.065       | 0.2259    | -1.711 |
| 93697_at   | 502    | 720.6 | 488.6  | 661.3  | 476.3  | 566.5  | 442.6  | 502.9  | 0.201827407 | 593.125 | 497.075 | 96.05   | 1.193230398 | 0.1831    | -1.181 |
| 93698_at   | 619.2  | 691.2 | 587.8  | 589.5  | 630.8  | 656.4  | 627    | 610.5  | 0.740282138 | 621.925 | 631.175 | 9.25    | 0.985344793 | 0.6979    | -1.017 |
| 93699_at   | 232.4  | 231.9 | 246.1  | 210.3  | 175.1  | 288    | 231.8  | 310.2  | 0.542197846 | 230.175 | 251.275 | 21.1    | 0.916028256 | 0.6381    | -1.068 |
| 93700_at   | 406.7  | 557.9 | 635.6  | 772.3  | 411.4  | 750.2  | 483.1  | 585    | 0.747615048 | 593.125 | 557.425 | 35.7    | 1.06404449  | 0.7546    | -1.063 |
| 93701_at   | 378.3  | 445.4 | 431.2  | 451    | 319.2  | 475.4  | 364.2  | 337.7  | 0.243473322 | 426.475 | 374.125 | 52.35   | 1.139926495 | 0.1968    | -1.151 |
| 93702_at   | 132.3  | 202.9 | 184.9  | 251.3  | 191.6  | 175.2  | 222.4  | 214.2  | 0.779985533 | 192.85  | 200.85  | 8       | 0.960169281 | 0.6819    | -1.064 |
| 93703_at   | 26.2   | 31.3  | 10.2   | 6.8    | 26.8   | 11.2   | 13.8   | 56     | 0.515814506 | 18.625  | 26.95   | 8.325   | 0.69109462  | 0.521     | 1.423  |
| 93704_at   | 7.1    | 19.3  | 8.7    | 38.8   | 14.7   | 36.4   | 13.6   | 7.3    | 0.96244556  | 18.475  | 18      | 0.475   | 1.026388889 | 0.9472    | -1.036 |
| 93705_at   | 153.7  | 135.2 | 128.1  | 127.9  | 141.3  | 157.5  | 105.9  | 160.1  | 0.736713459 | 136.225 | 141.2   | 4.975   | 0.964766289 | 0.8137    | -1.026 |
| 93706_at   | 206.5  | 207   | 207.9  | 224.4  | 172.6  | 217.6  | 205.6  | 219.2  | 0.545354386 | 211.45  | 203.75  | 7.7     | 1.037791411 | 0.5143    | -1.042 |
| 93707_f_at | 15.9   | 44    | 68.6   | 54.1   | 115.4  | 66.9   | 68.3   | 68.3   | 0.081596322 | 45.65   | 79.725  | 34.075  | 0.572593289 | 0.1079    | 1.93   |
| 93708_at   | 203.2  | 290.2 | 299.5  | 264.2  | 241.1  | 307.7  | 277.5  | 334.1  | 0.415334232 | 264.275 | 290.1   | 25.825  | 0.910978973 | 0.4222    | 1.102  |
| 93709_at   | 213.5  | 220.2 | 245    | 127.8  | 191    | 239.8  | 253.2  | 219.7  | 0.442060287 | 201.625 | 225.925 | 24.3    | 0.892442182 | 0.4184    | 1.147  |
| 93710_at   | 921.8  | 840.5 | 830.6  | 902.6  | 1041.7 | 744.1  | 832.2  | 1062.7 | 0.604955975 | 873.875 | 920.175 | 46.3    | 0.949683484 | 0.6641    | -1.042 |
| 93711_at   | 1304.7 | 674.1 | 829.1  | 1075.7 | 422.6  | 1002.6 | 480    | 525.6  | 0.107952543 | 970.9   | 607.7   | 363.2   | 1.597663321 | 0.08409   | -1.646 |
| 93712_at   | 531.6  | 442.2 | 527.7  | 438.5  | 502.9  | 495.2  | 408.4  | 538.5  | 0.974690394 | 485     | 486.25  | 1.25    | 0.997429306 | 0.9834    | -1.002 |
| 93713_at   | 247.8  | 359.9 | 254.9  | 286.2  | 139    | 391.2  | 197.1  | 161.1  | 0.35841474  | 287.2   | 222.1   | 65.1    | 1.293111211 | 0.2229    | -1.393 |
| 93714_f_at | 366.9  | 278.1 | 369.6  | 455.5  | 351.8  | 518.6  | 704    | 546.5  | 0.107308281 | 367.525 | 530.225 | 162.7   | 0.693149135 | 0.09177   | 1.422  |



|            |         |         |         |        |         |         |         |         |             |           |           |         |             |         |        |
|------------|---------|---------|---------|--------|---------|---------|---------|---------|-------------|-----------|-----------|---------|-------------|---------|--------|
| 93715_at   | 6       | 15.1    | 5.1     | 12.8   | 7.7     | 6.3     | 4       | 7.9     | 0.28544607  | 9.75      | 6.475     | 3.275   | 1.505791506 | 0.3229  | -1.4   |
| 93716_at   | 55.5    | 85.5    | 109.7   | 115.5  | 99.8    | 74.4    | 143.7   | 51.8    | 0.972212232 | 91.55     | 92.425    | 0.875   | 0.990532864 | 0.9414  | -1.021 |
| 93717_at   | 47.6    | 26.8    | 16.5    | 38.1   | 15.6    | 39.1    | 40      | 37.7    | 0.927392382 | 32.25     | 33.1      | 0.85    | 0.974320242 | 0.9183  | -1.035 |
| 93718_at   | 167.4   | 145.5   | 192.1   | 162    | 105.3   | 178.1   | 107.5   | 114.7   | 0.101488145 | 166.75    | 126.4     | 40.35   | 1.319224684 | 0.07255 | -1.345 |
| 93719_at   | 228.4   | 227.4   | 143.5   | 258.7  | 203.3   | 298.9   | 277.6   | 229.2   | 0.297395488 | 214.5     | 252.25    | 37.75   | 0.850346878 | 0.3097  | 1.19   |
| 93720_at   | 232.4   | 290     | 243.2   | 398    | 210.3   | 323     | 248     | 353.4   | 0.890344062 | 290.9     | 283.675   | 7.225   | 1.025469287 | 0.8977  | -1.023 |
| 93721_at   | 99.9    | 60.7    | 70.9    | 84.5   | 105.9   | 103.1   | 72.6    | 65      | 0.591296431 | 79        | 86.65     | 7.65    | 0.911713791 | 0.6135  | 1.091  |
| 93722_at   | 278.3   | 287.4   | 327.3   | 308.7  | 243.9   | 230.9   | 251.3   | 297     | 0.05137185  | 300.425   | 255.775   | 44.65   | 1.174567491 | 0.04647 | -1.177 |
| 93723_at   | 26.6    | 17.9    | 23.1    | 34.1   | 36.8    | 37.1    | 74.6    | 22.5    | 0.220023627 | 25.425    | 42.75     | 17.325  | 0.594736842 | 0.1573  | 1.573  |
| 93724_at   | 102.4   | 177.6   | 102.7   | 137.1  | 156.6   | 175.1   | 147.3   | 145     | 0.246993669 | 129.95    | 156       | 26.05   | 0.833012821 | 0.1873  | 1.23   |
| 93725_at   | 99.2    | 53.4    | 69.1    | 70.8   | 32.1    | 103     | 24.8    | 82.2    | 0.583287913 | 73.125    | 60.525    | 12.6    | 1.208178439 | 0.3995  | -1.399 |
| 93727_at   | 1723.5  | 2064.1  | 1957.6  | 1750.2 | 1865.5  | 1905.3  | 1592.5  | 1613.9  | 0.307187413 | 1873.85   | 1744.3    | 129.55  | 1.074270481 | 0.3042  | -1.075 |
| 93728_at   | 7821    | 7315.2  | 6868.6  | 6878.5 | 7675.3  | 8847.9  | 7888.3  | 7056.6  | 0.197804984 | 7220.825  | 7867.025  | 646.2   | 0.917859674 | 0.1848  | -1.087 |
| 93729_at   | 277.4   | 336.3   | 314.4   | 325.6  | 334     | 349.1   | 367     | 297.5   | 0.275916425 | 313.425   | 336.9     | 23.475  | 0.93032057  | 0.2869  | -1.074 |
| 93730_at   | 13671.9 | 16304.2 | 13575.4 | 12780  | 26254.9 | 13347.2 | 16972.6 | 14923.8 | 0.284234148 | 14082.875 | 17874.625 | 3791.75 | 0.787869676 | 0.2345  | 1.231  |
| 93731_at   | 2605.4  | 2741.1  | 2777.9  | 2785.2 | 2418.3  | 3112.9  | 2843.7  | 2916.8  | 0.569008778 | 2727.4    | 2822.925  | 95.525  | 0.966160986 | 0.6044  | -1.031 |
| 93732_f_at | 305.7   | 488.1   | 545.3   | 436.1  | 530.1   | 504.9   | 505.6   | 433.1   | 0.420286281 | 443.8     | 493.425   | 49.625  | 0.899427471 | 0.3817  | 1.134  |
| 93733_r_at | 176.5   | 257.6   | 246.7   | 179.3  | 244.4   | 289.4   | 192.4   | 187.2   | 0.694763287 | 215.025   | 228.35    | 13.325  | 0.941646595 | 0.6975  | -1.061 |
| 93734_i_at | 1679.9  | 1335.8  | 1657    | 1460.8 | 1389.6  | 1447.1  | 1498.6  | 1229.8  | 0.21321025  | 1533.375  | 1391.275  | 142.1   | 1.102136529 | 0.2178  | -1.1   |
| 93735_f_at | 2394.4  | 1832    | 2105.9  | 1835.3 | 2041.1  | 1873.6  | 1929    | 1557.5  | 0.303534441 | 2041.9    | 1850.3    | 191.6   | 1.103550776 | 0.3051  | -1.102 |
| 93736_at   | 883.7   | 979.5   | 978.9   | 946.5  | 978.5   | 1058.1  | 896.4   | 1300.5  | 0.295327344 | 947.15    | 1058.375  | 111.225 | 0.894909649 | 0.2648  | -1.108 |
| 93737_at   | 632.3   | 458.4   | 692.2   | 533.4  | 506.4   | 571.1   | 607.6   | 593.3   | 0.874766224 | 579.075   | 569.6     | 9.475   | 1.01663448  | 0.9497  | -1.007 |
| 93738_at   | 224.8   | 202.8   | 185.4   | 138    | 136.2   | 186.6   | 187.6   | 180     | 0.522954839 | 187.75    | 172.6     | 15.15   | 1.087775203 | 0.5771  | -1.08  |
| 93740_at   | 9861.4  | 13632   | 12605.2 | 9916.5 | 19406.7 | 11568   | 14189   | 10272.4 | 0.347866948 | 11503.775 | 13859.025 | 2355.25 | 0.830056588 | 0.3436  | 1.181  |
| 93741_at   | 564.2   | 420.9   | 580.5   | 511.2  | 468.5   | 534     | 540.4   | 534.1   | 0.999053144 | 519.2     | 519.25    | 0.05    | 0.999903707 | 0.9421  | -1.006 |
| 93742_at   | 429     | 617.5   | 645.1   | 578.2  | 612.5   | 516.5   | 525.7   | 612.3   | 0.99035869  | 567.45    | 566.75    | 0.7     | 1.001235112 | 0.9444  | -1.008 |
| 93743_at   | 1682.3  | 1351.3  | 1423.6  | 1257.3 | 1381.1  | 1434.3  | 1485    | 1412.4  | 0.996639622 | 1428.625  | 1428.2    | 0.425   | 1.000297577 | 0.9377  | -1.005 |
| 93744_at   | 152.1   | 118.2   | 182.5   | 190.5  | 203.7   | 223.6   | 191.4   | 187.3   | 0.084939202 | 160.825   | 201.5     | 40.675  | 0.798138958 | 0.0831  | 1.271  |
| 93747_at   | 1840.4  | 1693    | 1768.2  | 1613.8 | 1756.7  | 2334.2  | 2391.2  | 1985    | 0.076088194 | 1728.85   | 2116.775  | 387.925 | 0.816737726 | 0.04549 | 1.216  |
| 93748_at   | 1718.1  | 2744.4  | 2850.7  | 2409.8 | 1966.6  | 2293.7  | 2221.9  | 2159.9  | 0.373814531 | 2430.75   | 2160.525  | 270.225 | 1.125073767 | 0.4328  | -1.106 |
| 93749_at   | 1462.5  | 1136.2  | 1174.8  | 1234.2 | 1092.3  | 1278.5  | 1096.7  | 1400.5  | 0.749993777 | 1251.925  | 1217      | 34.925  | 1.028697617 | 0.7373  | -1.03  |
| 93750_at   | 2878    | 2819.1  | 2371.9  | 2344   | 2281    | 2804    | 2156.1  | 2902.8  | 0.784277418 | 2603.25   | 2535.975  | 67.275  | 1.026528258 | 0.7566  | -1.03  |
| 93751_at   | 621.5   | 927.5   | 739     | 932.7  | 668.9   | 783     | 1053.8  | 837.3   | 0.792009896 | 805.175   | 835.75    | 30.575  | 0.963416093 | 0.7909  | -1.038 |
| 93752_at   | 1481.5  | 1102.2  | 1358.8  | 1366.2 | 1068    | 1509.3  | 1506.6  | 1493.9  | 0.637864758 | 1327.175  | 1394.45   | 67.275  | 0.951755172 | 0.6875  | -1.046 |
| 93753_at   | 1140.4  | 1037.4  | 910.7   | 996.9  | 958.3   | 1142.1  | 1112.2  | 1011.8  | 0.607605043 | 1021.35   | 1056.1    | 34.75   | 0.967095919 | 0.6013  | -1.035 |
| 93754_at   | 3990.6  | 3856.9  | 4172    | 3580.9 | 4956.3  | 3478.5  | 4207.8  | 3963.1  | 0.492035417 | 3900.1    | 4151.425  | 251.325 | 0.939460547 | 0.5123  | -1.057 |
| 93755_at   | 12.1    | 8.1     | 7       | 8.9    | 12.4    | 9.3     | 12.4    | 13.4    | 0.092154578 | 9.025     | 11.875    | 2.85    | 0.76        | 0.09142 | 1.329  |
| 93757_at   | 2612.2  | 2535.1  | 2569.3  | 2444.6 | 2175.6  | 2766.5  | 2574    | 2423.7  | 0.694560752 | 2540.3    | 2484.95   | 55.35   | 1.02227409  | 0.6449  | -1.026 |
| 93758_at   | 472.7   | 615.9   | 505.7   | 499.6  | 443.1   | 472.9   | 542.5   | 495.6   | 0.397663942 | 523.475   | 488.525   | 34.95   | 1.071541886 | 0.3892  | -1.069 |
| 93760_at   | 3226.2  | 2413.8  | 2850.4  | 2405.8 | 2841.6  | 2389.4  | 2586    | 2648.9  | 0.645834011 | 2724.05   | 2616.475  | 107.575 | 1.041114477 | 0.6787  | -1.035 |
| 93761_at   | 31.8    | 55.4    | 44.1    | 78.1   | 63.4    | 80.8    | 70.1    | 54.8    | 0.246139362 | 52.35     | 67.275    | 14.925  | 0.778149387 | 0.2047  | 1.341  |
| 93762_at   | 1559.5  | 2079.4  | 1728.4  | 1767.3 | 2001    | 1516.3  | 1906.1  | 1789.2  | 0.901407639 | 1783.65   | 1803.15   | 19.5    | 0.989185592 | 0.9022  | -1.011 |
| 93764_at   | 3083.3  | 1633.6  | 1924    | 1758.5 | 2035.2  | 1718.2  | 1825.9  | 1798.2  | 0.503112908 | 2099.85   | 1844.375  | 255.475 | 1.138515757 | 0.5278  | -1.104 |
| 93765_at   | 2.5     | 7.8     | 10.4    | 3.2    | 3.1     | 7.2     | 4.8     | 4.8     | 0.652773892 | 5.975     | 4.975     | 1       | 1.201005025 | 0.8838  | -1.06  |
| 93766_at   | 106.8   | 59.2    | 81.7    | 30.3   | 11      | 85.4    | 45.2    | 98.5    | 0.725577155 | 69.5      | 60.025    | 9.475   | 1.157850895 | 0.5828  | -1.392 |
| 93767_i_at | 1999.5  | 2709.2  | 2030.1  | 2135.2 | 2226.4  | 2139.1  | 1996.9  | 2643.6  | 0.884054457 | 2218.5    | 2251.5    | 33      | 0.985343105 | 0.8599  | -1.017 |
| 93768_f_at | 1482.6  | 2303.4  | 1780.8  | 1759.7 | 2285.8  | 2017.2  | 1853.1  | 1653.4  | 0.599702034 | 1831.625  | 1952.375  | 120.75  | 0.93815225  | 0.5638  | -1.072 |
| 93769_at   | 431.7   | 547.8   | 554     | 464    | 568.1   | 496.4   | 540.8   | 492.8   | 0.510965233 | 499.375   | 524.525   | 25.15   | 0.952051856 | 0.4813  | -1.054 |
| 93770_at   | 6.2     | 3.7     | 7.8     | 8.5    | 4.8     | 8.1     | 4.5     | 5.6     | 0.57435782  | 6.55      | 5.75      | 0.8     | 1.139130435 | 0.6372  | -1.12  |
| 93771_at   | 28.6    | 31      | 38.6    | 31.5   | 45.9    | 32.4    | 32.5    | 45.9    | 0.192746302 | 32.425    | 39.175    | 6.75    | 0.827696235 | 0.178   | 1.198  |
| 93772_i_at | 1818.7  | 1603.1  | 1860.5  | 1520.4 | 1423.4  | 1670.7  | 1473.5  | 1504.9  | 0.120675034 | 1700.675  | 1518.125  | 182.55  | 1.120247015 | 0.1104  | -1.118 |
| 93773_f_at | 2229    | 2000.5  | 1841.3  | 1878.4 | 2007    | 1932.5  | 2131.8  | 1486    | 0.579659234 | 1987.3    | 1889.325  | 97.975  | 1.051857145 | 0.5529  | -1.059 |
| 93774_at   | 556.2   | 643.8   | 548.4   | 566.1  | 764.9   | 570.8   | 613.9   | 559.7   | 0.400836681 | 578.625   | 627.325   | 48.7    | 0.922368788 | 0.3878  | -1.078 |
| 93775_at   | 2766.1  | 2564.6  | 3008.3  | 2396.2 | 3610.3  | 3253.4  | 3747.6  | 2870.2  | 0.031932522 | 2683.8    | 3370.375  | 686.575 | 0.796291214 | 0.02644 | 1.254  |
| 93776_at   | 348.6   | 248.2   | 296     | 305.5  | 337.5   | 248.1   | 293.2   | 298     | 0.851826699 | 299.575   | 294.2     | 5.375   | 1.018269884 | 0.8637  | -1.017 |
| 93777_at   | 560.2   | 284.7   | 545.4   | 509.8  | 369.7   | 403.7   | 399.9   | 400.3   | 0.294535065 | 475.025   | 393.4     | 81.625  | 1.207486019 | 0.3761  | -1.167 |



|            |        |        |        |        |        |        |        |        |             |          |          |         |             |          |        |
|------------|--------|--------|--------|--------|--------|--------|--------|--------|-------------|----------|----------|---------|-------------|----------|--------|
| 93778_at   | 343.1  | 326.6  | 473    | 399.7  | 426.3  | 355.7  | 392.1  | 302    | 0.71018133  | 385.6    | 369.025  | 16.575  | 1.044915656 | 0.7239   | -1.042 |
| 93779_at   | 18.2   | 17.9   | 33.3   | 18.6   | 81.8   | 41.9   | 22.4   | 22.4   | 0.248408119 | 22       | 42.125   | 20.125  | 0.522255193 | 0.1709   | 1.708  |
| 93780_at   | 550    | 415.4  | 469.4  | 443.9  | 730.1  | 487.9  | 501.2  | 399    | 0.476681031 | 469.675  | 529.55   | 59.875  | 0.886932301 | 0.4973   | -1.106 |
| 93781_at   | 619.6  | 627.4  | 709.3  | 442.7  | 652.1  | 394    | 369.8  | 244.2  | 0.128906431 | 599.75   | 415.025  | 184.725 | 1.445093669 | 0.1149   | -1.514 |
| 93782_at   | 3590.1 | 3264.1 | 3263.8 | 3394.8 | 3118.3 | 3645.7 | 3248.3 | 3255.3 | 0.673765097 | 3378.2   | 3316.9   | 61.3    | 1.018481112 | 0.6503   | -1.019 |
| 93783_at   | 94.2   | 168.9  | 102    | 156.4  | 179.9  | 129.4  | 58.9   | 293.9  | 0.544334156 | 130.375  | 165.525  | 35.15   | 0.787645371 | 0.7649   | 1.122  |
| 93784_at   | 2582.7 | 1544.6 | 1936.8 | 2536.2 | 1911.2 | 2237.1 | 2556.4 | 1680.6 | 0.870286142 | 2150.075 | 2096.325 | 53.75   | 1.025640108 | 0.919    | -1.016 |
| 93785_at   | 1907.5 | 1787.6 | 1687.6 | 1259.1 | 1556.6 | 948.8  | 1138.6 | 929.3  | 0.043524981 | 1660.45  | 1143.325 | 517.125 | 1.452299215 | 0.0436   | -1.467 |
| 93786_i_at | 1938.8 | 1289.4 | 1873.7 | 1512   | 1112.7 | 1512.6 | 1340   | 1142.3 | 0.090646556 | 1653.475 | 1276.9   | 376.575 | 1.294913462 | 0.07932  | -1.288 |
| 93787_f_at | 4606.6 | 3459.9 | 3553   | 3844.9 | 3711.1 | 3263.7 | 3688.3 | 3307.6 | 0.258884987 | 3866.1   | 3492.675 | 373.425 | 1.106916618 | 0.2333   | -1.102 |
| 93788_at   | 92.4   | 109.8  | 129.4  | 117.4  | 101.2  | 101.7  | 132.1  | 136.1  | 0.667904469 | 112.25   | 117.775  | 5.525   | 0.953088516 | 0.6841   | -1.047 |
| 93789_s_at | 9108   | 8116.8 | 8361.4 | 8168.2 | 8346.8 | 6797.7 | 7485.7 | 6365.4 | 0.064187668 | 8438.6   | 7248.9   | 1189.7  | 1.164121453 | 0.05236  | -1.169 |
| 93790_at   | 134    | 152.5  | 242.5  | 204.7  | 138.6  | 191.7  | 135.5  | 200.3  | 0.597019284 | 183.425  | 166.525  | 16.9    | 1.101486263 | 0.6341   | -1.089 |
| 93793_at   | 1021.7 | 1688.3 | 1142.5 | 1419.8 | 891.8  | 1286.5 | 1327.6 | 1135.5 | 0.416041976 | 1318.075 | 1160.35  | 157.725 | 1.135928815 | 0.4355   | -1.128 |
| 93794_at   | 1815   | 1396.5 | 1447.1 | 1575.5 | 913    | 1650.3 | 1467.9 | 1293.1 | 0.270112275 | 1558.525 | 1331.075 | 227.45  | 1.170876923 | 0.2577   | -1.192 |
| 93795_at   | 837.4  | 787    | 1005.8 | 822.1  | 981    | 792    | 837.7  | 915.9  | 0.782384923 | 863.075  | 881.65   | 18.575  | 0.978931549 | 0.7655   | -1.023 |
| 93796_at   | 47.5   | 28.2   | 33.8   | 26.1   | 57.6   | 28.6   | 7.2    | 27.7   | 0.766081885 | 33.9     | 30.275   | 3.625   | 1.119735756 | 0.5076   | -1.378 |
| 93797_g_at | 892.5  | 1311.6 | 1237.2 | 1423.1 | 884    | 1331.7 | 1080.7 | 1530   | 0.960127382 | 1216.1   | 1206.6   | 9.5     | 1.007873363 | 0.9307   | -1.014 |
| 93798_at   | 1698.7 | 2391.1 | 1874.9 | 2292.6 | 2149.6 | 2213.8 | 2227.1 | 2445.4 | 0.336111182 | 2064.325 | 2258.975 | 194.65  | 0.913832601 | 0.2949   | -1.104 |
| 93799_at   | 428.2  | 416.6  | 473.1  | 383.4  | 370.5  | 435.2  | 409.4  | 385.2  | 0.323708257 | 425.325  | 400.075  | 25.25   | 1.063113166 | 0.3223   | -1.062 |
| 93800_f_at | 80.1   | 66.9   | 94.2   | 48.8   | 224.8  | 136.2  | 194.2  | 186.9  | 0.003805335 | 72.5     | 185.525  | 113.025 | 0.390782913 | 0.001654 | 2.593  |
| 93801_at   | 17.5   | 5.6    | 9.3    | 8.4    | 10.6   | 13.6   | 20.1   | 56.6   | 0.254718656 | 10.2     | 25.225   | 15.025  | 0.404360753 | 0.1323   | 2.143  |
| 93802_at   | 86.8   | 106.3  | 71.3   | 91.2   | 98.5   | 89.1   | 56.7   | 95.3   | 0.751097294 | 88.9     | 84.9     | 4       | 1.047114252 | 0.7138   | -1.061 |
| 93803_at   | 431.6  | 431.1  | 446.9  | 479.7  | 245.3  | 496.6  | 378.7  | 414.9  | 0.314961433 | 447.325  | 383.875  | 63.45   | 1.16528818  | 0.2721   | -1.202 |
| 93804_at   | 163.4  | 176.4  | 167.2  | 132.8  | 208.5  | 222.6  | 251.5  | 171.3  | 0.040516432 | 159.95   | 213.475  | 53.525  | 0.749268064 | 0.03107  | 1.329  |
| 93805_at   | 2084.5 | 1921.5 | 2041.3 | 1742.5 | 2042.2 | 1472.8 | 1793.5 | 1615.9 | 0.194565023 | 1947.45  | 1731.1   | 216.35  | 1.124978337 | 0.1797   | -1.131 |
| 93806_at   | 4004.1 | 3126.1 | 3392.7 | 3808.4 | 3624.4 | 3513.9 | 3431.8 | 3299.3 | 0.613933833 | 3582.825 | 3467.35  | 115.475 | 1.033303532 | 0.6457   | -1.029 |
| 93807_at   | 32.5   | 15.2   | 10.9   | 13.6   | 9      | 21.6   | 24.9   | 46.5   | 0.454721818 | 18.05    | 25.5     | 7.45    | 0.707843137 | 0.5224   | 1.324  |
| 93808_at   | 61.3   | 40.1   | 48.3   | 25.3   | 74.8   | 48.2   | 51.3   | 26.4   | 0.625455474 | 43.75    | 50.175   | 6.425   | 0.871948181 | 0.6852   | 1.129  |
| 93809_at   | 788.3  | 1224   | 1081.1 | 1005.3 | 1185   | 1024.6 | 1079.8 | 1118.4 | 0.472150931 | 1024.675 | 1101.95  | 77.275  | 0.929874314 | 0.4234   | -1.087 |
| 93810_at   | 3281.4 | 3052.2 | 2915.4 | 3401.2 | 3740.2 | 3365   | 3118.7 | 3820.1 | 0.1351881   | 3162.55  | 3511     | 348.45  | 0.900754771 | 0.1303   | 1.108  |
| 93812_at   | 1521.5 | 1169.8 | 1376.4 | 1042.1 | 915.8  | 1097.2 | 1133.5 | 1311.7 | 0.272720612 | 1277.45  | 1114.55  | 162.9   | 1.146157642 | 0.2764   | -1.143 |
| 93815_at   | 2180.5 | 1968.7 | 1866.3 | 1912.5 | 1904.1 | 1755.1 | 1657.2 | 1923.3 | 0.11705409  | 1982     | 1809.925 | 172.075 | 1.095073    | 0.1137   | -1.095 |
| 93817_at   | 164.5  | 109.8  | 216    | 99.3   | 94     | 207.4  | 173.2  | 77     | 0.825746911 | 147.4    | 137.9    | 9.5     | 1.0688905   | 0.7498   | -1.105 |
| 93818_g_at | 2517.3 | 2276.7 | 2141.1 | 2091.7 | 1864.5 | 2477   | 1805   | 1992.4 | 0.27158228  | 2256.7   | 2034.725 | 221.975 | 1.109093366 | 0.2344   | -1.115 |
| 93819_at   | 4079.5 | 4089.6 | 4002.2 | 3859.4 | 3197   | 3566.3 | 2974.3 | 3935.3 | 0.064484101 | 4007.675 | 3418.225 | 589.45  | 1.1724433   | 0.03987  | -1.179 |
| 93820_at   | 6205.7 | 5544   | 5781.7 | 5436.7 | 7122.4 | 5001.3 | 5732.2 | 5086.7 | 0.990830728 | 5742.025 | 5735.65  | 6.375   | 1.001111469 | 0.9107   | -1.01  |
| 93821_at   | 247.7  | 430.7  | 266.1  | 417.5  | 490.1  | 330.9  | 464.8  | 429.6  | 0.194584626 | 340.5    | 428.85   | 88.35   | 0.79398391  | 0.1895   | 1.286  |
| 93822_at   | 4683.5 | 4411.4 | 4948.7 | 4379.3 | 6890.8 | 4224.9 | 5211.9 | 5502.9 | 0.220261176 | 4605.725 | 5457.625 | 851.9   | 0.843906461 | 0.1865   | 1.169  |
| 93823_at   | 1064.5 | 859.8  | 1010.4 | 727.8  | 867.5  | 894.5  | 794.4  | 824.3  | 0.431076538 | 915.625  | 845.175  | 70.45   | 1.083355518 | 0.4639   | -1.073 |
| 93824_at   | 91.6   | 105    | 70.4   | 120.9  | 91.2   | 81.4   | 84.2   | 121.8  | 0.875063679 | 96.975   | 94.65    | 2.325   | 1.024564184 | 0.9047   | -1.019 |
| 93826_at   | 628.2  | 760.2  | 790.9  | 620.4  | 432.4  | 700.2  | 574.4  | 828.6  | 0.523967064 | 699.925  | 633.9    | 66.025  | 1.104156807 | 0.4582   | -1.129 |
| 93827_at   | 45.6   | 51.3   | 53.6   | 58.9   | 44.9   | 44.6   | 58     | 62.5   | 0.978672547 | 52.35    | 52.5     | 0.15    | 0.997142857 | 0.9679   | -1.004 |
| 93829_at   | 1581.6 | 1063.1 | 1265   | 1519.1 | 983.2  | 1219.1 | 1275.5 | 1127.1 | 0.194276301 | 1357.2   | 1151.225 | 205.975 | 1.178918109 | 0.1947   | -1.17  |
| 93830_at   | 6084.7 | 4826.5 | 6083.3 | 5691   | 4389   | 5876.9 | 5804.5 | 4240.1 | 0.312969347 | 5671.375 | 5077.625 | 593.75  | 1.11693459  | 0.2982   | -1.125 |
| 93831_at   | 1286.9 | 892.3  | 973.1  | 884.9  | 682.2  | 1124.2 | 714.3  | 623.5  | 0.184840209 | 1009.3   | 786.05   | 223.25  | 1.284015012 | 0.1439   | -1.304 |
| 93832_at   | 929.5  | 667.5  | 1014.4 | 807    | 659.4  | 985.8  | 654.2  | 721    | 0.395899852 | 854.6    | 755.1    | 99.5    | 1.131770626 | 0.3787   | -1.134 |
| 93833_s_at | 1326.3 | 1155.1 | 1434.9 | 954.9  | 1774.5 | 1358.6 | 1488.9 | 654    | 0.716527795 | 1217.8   | 1319     | 101.2   | 0.923275208 | 0.91     | -1.028 |
| 93834_at   | 118.9  | 88.8   | 158.4  | 162.1  | 164.2  | 118.5  | 78.7   | 167.1  | 0.997898764 | 132.05   | 132.125  | 0.075   | 0.999432356 | 0.9522   | -1.014 |
| 93835_at   | 672.1  | 655.1  | 600.8  | 586.4  | 688.3  | 723    | 571.9  | 625.6  | 0.575196824 | 628.6    | 652.2    | 23.6    | 0.963814781 | 0.5957   | -1.035 |
| 93836_at   | 339.4  | 287.3  | 343.2  | 390.1  | 157.2  | 324.5  | 287.5  | 242    | 0.092958256 | 340      | 252.8    | 87.2    | 1.344936709 | 0.1048   | -1.385 |
| 93837_at   | 111.5  | 119.2  | 112.1  | 146.8  | 167.7  | 143.5  | 211.9  | 138.1  | 0.07831694  | 122.4    | 165.3    | 42.9    | 0.740471869 | 0.04614  | 1.34   |
| 93838_at   | 2357.3 | 2199.2 | 2242.3 | 1538.8 | 2048.7 | 2118.2 | 2422.6 | 1690.5 | 0.953854764 | 2084.4   | 2070     | 14.4    | 1.006956522 | 0.9898   | -1.002 |
| 93839_at   | 1448.6 | 995.2  | 1096.5 | 1120.3 | 886.7  | 1443.8 | 1029.7 | 1076.5 | 0.729226121 | 1165.15  | 1109.175 | 55.975  | 1.050465436 | 0.6843   | -1.057 |
| 93840_at   | 35.5   | 28.2   | 17.5   | 28.6   | 43.2   | 35.6   | 26.8   | 17     | 0.655340976 | 27.45    | 30.65    | 3.2     | 0.895595432 | 0.7493   | -1.088 |
| 93841_at   | 933    | 673.9  | 636.7  | 729.2  | 481.5  | 717.5  | 563.9  | 836.6  | 0.401301918 | 743.2    | 649.875  | 93.325  | 1.143604539 | 0.3662   | -1.157 |



|            |        |        |        |        |        |        |        |        |             |          |          |         |             |          |        |
|------------|--------|--------|--------|--------|--------|--------|--------|--------|-------------|----------|----------|---------|-------------|----------|--------|
| 93842_at   | 2281   | 2208.7 | 1754.2 | 1765.8 | 2075.7 | 2211.3 | 1929.8 | 1878.4 | 0.899126216 | 2002.425 | 2023.8   | 21.375  | 0.989438186 | 0.8474   | -1.016 |
| 93843_at   | 1634.2 | 1446.8 | 1839.6 | 1447.8 | 1582.7 | 1673.1 | 1615.8 | 1646.5 | 0.719474616 | 1592.1   | 1629.525 | 37.425  | 0.977033185 | 0.6504   | -1.028 |
| 93844_at   | 5421.8 | 5415.2 | 5478.4 | 4829.8 | 11093  | 4849.9 | 6421.2 | 4799.1 | 0.385739985 | 5286.3   | 6790.8   | 1504.5  | 0.778450256 | 0.3766   | 1.209  |
| 93845_at   | 816.3  | 716    | 968.5  | 673.3  | 827    | 776.7  | 824.1  | 862.6  | 0.693991222 | 793.525  | 822.6    | 29.075  | 0.964654753 | 0.6071   | -1.046 |
| 93846_at   | 16.2   | 35.6   | 36.8   | 13.2   | 19     | 42.1   | 34.2   | 48.8   | 0.282007191 | 25.45    | 36.025   | 10.575  | 0.706453851 | 0.2903   | 1.477  |
| 93847_at   | 13.9   | 8.7    | 52.6   | 35.5   | 14.1   | 36.9   | 19.5   | 21.1   | 0.691654944 | 27.675   | 22.9     | 4.775   | 1.208515284 | 0.9785   | -1.013 |
| 93848_at   | 19.5   | 24     | 24.9   | 16.2   | 22.8   | 23.5   | 36.6   | 43.2   | 0.128737735 | 21.15    | 31.525   | 10.375  | 0.670896114 | 0.09417  | 1.453  |
| 93849_at   | 109.8  | 64.7   | 79.7   | 96.9   | 58.6   | 94.4   | 78.7   | 62.9   | 0.313279001 | 87.775   | 73.65    | 14.125  | 1.191785472 | 0.3166   | -1.189 |
| 93850_at   | 102.3  | 58     | 74.2   | 102.7  | 60     | 122.6  | 59.9   | 89.6   | 0.947632004 | 84.3     | 83.025   | 1.275   | 1.01535682  | 0.8831   | -1.035 |
| 93851_at   | 212.3  | 208.3  | 248.5  | 206.7  | 326.3  | 205.4  | 232.2  | 280.9  | 0.216064209 | 218.95   | 261.2    | 42.25   | 0.838246554 | 0.1913   | 1.178  |
| 93852_at   | 1024.6 | 1032   | 1011.5 | 1286.1 | 890    | 1042   | 1025.2 | 1255.2 | 0.735926013 | 1088.55  | 1053.1   | 35.45   | 1.03366252  | 0.7098   | -1.036 |
| 93853_at   | 395    | 253.4  | 276.7  | 500.4  | 304.8  | 449.2  | 481.5  | 258.7  | 0.83466953  | 356.375  | 373.55   | 17.175  | 0.954022219 | 0.8199   | -1.053 |
| 93855_at   | 157.3  | 179.9  | 200.1  | 192.1  | 236.5  | 137.5  | 207.1  | 171.1  | 0.81962816  | 182.35   | 188.05   | 5.7     | 0.969688913 | 0.9149   | -1.015 |
| 93856_at   | 479.1  | 664.2  | 606.7  | 712.3  | 539.9  | 753.6  | 570.6  | 824.1  | 0.536181896 | 615.575  | 672.05   | 56.475  | 0.915966074 | 0.563    | -1.086 |
| 93857_at   | 228.8  | 123.8  | 171.8  | 175.7  | 60.7   | 154.6  | 86.8   | 74.9   | 0.035514996 | 175.025  | 94.25    | 80.775  | 1.857029178 | 0.03155  | -1.935 |
| 93858_at   | 4.8    | 13.8   | 17     | 19.4   | 18.6   | 29.9   | 8.3    | 33.9   | 0.238506843 | 13.75    | 22.675   | 8.925   | 0.606394708 | 0.3172   | 1.633  |
| 93859_at   | 596.4  | 635.8  | 728.2  | 702.3  | 800.7  | 829.4  | 836.7  | 754.6  | 0.011021347 | 665.675  | 805.35   | 139.675 | 0.826566089 | 0.009475 | 1.213  |
| 93860_i_at | 235.6  | 362.6  | 382.1  | 298.4  | 413.8  | 359.6  | 561.9  | 344.7  | 0.150900982 | 319.675  | 420      | 100.325 | 0.761130952 | 0.1323   | 1.311  |
| 93861_f_at | 362    | 429.1  | 462.9  | 406.1  | 264.6  | 524.2  | 521    | 444.1  | 0.735613857 | 415.025  | 438.475  | 23.45   | 0.946519186 | 0.8937   | -1.024 |
| 93862_i_at | 18.5   | 21.6   | 14.8   | 19     | 10.4   | 12.8   | 33.3   | 21.8   | 0.849442924 | 18.475   | 19.575   | 1.1     | 0.943805875 | 0.8999   | -1.037 |
| 93863_f_at | 21     | 56.8   | 38.3   | 42.7   | 15.8   | 57.6   | 48.9   | 30     | 0.89650172  | 39.7     | 38.075   | 1.625   | 1.042678923 | 0.8009   | -1.099 |
| 93864_s_at | 22.3   | 47.9   | 35.4   | 57.3   | 11.2   | 45.3   | 32.3   | 25.8   | 0.289806107 | 40.725   | 28.65    | 12.075  | 1.421465969 | 0.3017   | -1.504 |
| 93865_s_at | 467.4  | 344.4  | 418.1  | 435.9  | 451.9  | 607.3  | 513.5  | 544    | 0.036508311 | 416.45   | 529.175  | 112.725 | 0.786979733 | 0.0368   | 1.271  |
| 93866_s_at | 2297.2 | 1800.3 | 2205.8 | 1781.2 | 1905.6 | 1486.6 | 1665.2 | 1607.7 | 0.076376786 | 2021.125 | 1666.275 | 354.85  | 1.212960046 | 0.0647   | -1.21  |
| 93867_at   | 27.8   | 84.4   | 66.3   | 61.1   | 89.4   | 97.4   | 107.4  | 76.1   | 0.063590378 | 59.9     | 92.575   | 32.675  | 0.647042938 | 0.09228  | 1.654  |
| 93868_at   | 536.2  | 373.9  | 466.7  | 422    | 265.7  | 411.7  | 406.7  | 408.5  | 0.17481025  | 449.7    | 373.15   | 76.55   | 1.205145384 | 0.1925   | -1.214 |
| 93869_s_at | 65.4   | 63.8   | 92.9   | 49.7   | 123.6  | 59.2   | 86.1   | 105.3  | 0.178864334 | 67.95    | 93.55    | 25.6    | 0.726349546 | 0.1805   | 1.362  |
| 93870_at   | 48.2   | 47.5   | 47.4   | 65.2   | 34.1   | 46.3   | 32.9   | 68.5   | 0.513008688 | 52.075   | 45.45    | 6.625   | 1.145764576 | 0.3951   | -1.187 |
| 93871_at   | 24.5   | 11.1   | 29.9   | 37.9   | 89.7   | 82.7   | 70.1   | 39.2   | 0.019795115 | 25.85    | 70.425   | 44.575  | 0.367057153 | 0.01816  | 2.854  |
| 93872_at   | 139.5  | 123.6  | 144.1  | 177    | 37.9   | 66.6   | 57.6   | 85.3   | 0.001404836 | 146.05   | 61.85    | 84.2    | 2.361358124 | 0.00299  | -2.441 |
| 93873_s_at | 8.6    | 9.4    | 10.6   | 9.9    | 29.8   | 8      | 17.1   | 8.3    | 0.314687791 | 9.625    | 15.8     | 6.175   | 0.609177215 | 0.3189   | 1.413  |
| 93874_s_at | 1170.6 | 1033.1 | 1023.9 | 924.4  | 1220.2 | 1202.7 | 1258.1 | 1333.2 | 0.015234329 | 1038     | 1253.55  | 215.55  | 0.828048343 | 0.01162  | 1.211  |
| 93875_at   | 800.8  | 953.4  | 819.4  | 1030.1 | 653.9  | 781.5  | 958    | 720.8  | 0.202532075 | 900.925  | 778.55   | 122.375 | 1.157183225 | 0.1873   | -1.163 |
| 93877_at   | 573.1  | 802.6  | 654.6  | 720.3  | 510.1  | 772.7  | 792.8  | 774.2  | 0.777019959 | 687.65   | 712.45   | 24.8    | 0.96519054  | 0.8381   | -1.028 |
| 93878_at   | 123.4  | 142.1  | 182.5  | 148.3  | 126.5  | 126.4  | 134.3  | 125.4  | 0.188035794 | 149.075  | 128.15   | 20.925  | 1.163285213 | 0.1358   | -1.152 |
| 93879_f_at | 15.2   | 20.3   | 24.2   | 25.6   | 36.5   | 61     | 26.5   | 23     | 0.169104762 | 21.325   | 36.75    | 15.425  | 0.580272109 | 0.09339  | 1.634  |
| 93880_at   | 16.8   | 27.2   | 56.8   | 25.7   | 35.3   | 42.8   | 23.4   | 25.9   | 0.982628471 | 31.625   | 31.85    | 0.225   | 0.992935636 | 0.7946   | -1.082 |
| 93881_i_at | 152.1  | 100.1  | 144.9  | 217.7  | 70.3   | 154.4  | 127.2  | 103.2  | 0.237130616 | 153.7    | 113.775  | 39.925  | 1.350911887 | 0.2377   | -1.355 |
| 93882_f_at | 406.7  | 216.5  | 349.9  | 343.7  | 189.7  | 356.5  | 193.9  | 244.5  | 0.187682901 | 329.2    | 246.15   | 83.05   | 1.337395897 | 0.1863   | -1.348 |
| 93883_at   | 138.4  | 32.4   | 154.8  | 55.4   | 150.9  | 132.1  | 155.8  | 135.9  | 0.207227935 | 95.25    | 143.675  | 48.425  | 0.662954585 | 0.1635   | 1.82   |
| 93884_at   | 26     | 20.2   | 48.9   | 46.7   | 49.8   | 41.8   | 39.2   | 35.2   | 0.484417639 | 35.45    | 41.5     | 6.05    | 0.854216867 | 0.3799   | 1.244  |
| 93885_g_at | 322.9  | 260.7  | 279.9  | 268.3  | 239.3  | 308.7  | 299.9  | 360.8  | 0.531800504 | 282.95   | 302.175  | 19.225  | 0.936377927 | 0.5687   | -1.06  |
| 93886_at   | 147    | 151.1  | 108    | 225.8  | 199.9  | 138    | 148.5  | 185.6  | 0.741208978 | 157.975  | 168      | 10.025  | 0.940327381 | 0.6449   | -1.089 |
| 93887_at   | 543.4  | 387.3  | 336.4  | 324.8  | 355.5  | 509.1  | 436.6  | 503.9  | 0.425267912 | 397.975  | 451.275  | 53.3    | 0.8818902   | 0.3785   | 1.147  |
| 93888_at   | 65.6   | 85.6   | 96     | 72.3   | 134.2  | 159    | 141.9  | 158.1  | 0.000309972 | 79.875   | 148.3    | 68.425  | 0.538604181 | 0.000576 | 1.872  |
| 93889_f_at | 106.4  | 135.4  | 163    | 124    | 167.1  | 126.5  | 177.4  | 91.8   | 0.726643796 | 132.2    | 140.7    | 8.5     | 0.939587775 | 0.8187   | -1.043 |
| 93890_at   | 13.4   | 33.4   | 9.1    | 14.5   | 49     | 13.1   | 18.3   | 12.4   | 0.607815463 | 17.6     | 23.2     | 5.6     | 0.75862069  | 0.6109   | 1.252  |
| 93891_at   | 22.3   | 8.4    | 8.3    | 5.8    | 5.5    | 37.5   | 4.5    | 7.4    | 0.787255656 | 11.2     | 13.725   | 2.525   | 0.816029144 | 0.9093   | -1.069 |
| 93892_at   | 305.7  | 294    | 245.6  | 330.9  | 182.4  | 290    | 198.8  | 227.6  | 0.061319747 | 294.05   | 224.7    | 69.35   | 1.308633734 | 0.058    | -1.322 |
| 93893_f_at | 30.8   | 18.8   | 37.9   | 41.3   | 29.2   | 17.2   | 28.7   | 21.7   | 0.225183333 | 32.2     | 24.2     | 8       | 1.330578512 | 0.2656   | -1.305 |
| 93894_f_at | 20.6   | 20.2   | 7.6    | 15     | 15     | 15.3   | 28     | 21.2   | 0.386237637 | 15.85    | 19.875   | 4.025   | 0.797484277 | 0.3736   | 1.305  |
| 93895_s_at | 489.8  | 526.7  | 477    | 490.7  | 402.6  | 472.4  | 432.2  | 477.9  | 0.062394417 | 496.05   | 446.275  | 49.775  | 1.111534368 | 0.05642  | -1.114 |
| 93896_at   | 345    | 295.9  | 295.8  | 372.5  | 244.3  | 328.1  | 382.4  | 298.7  | 0.702762683 | 327.3    | 313.375  | 13.925  | 1.04443558  | 0.6565   | -1.053 |
| 93897_at   | 6.4    | 28.3   | 15.2   | 8.9    | 6.6    | 9.2    | 7.7    | 7.7    | 0.253807398 | 14.7     | 7.8      | 6.9     | 1.884615385 | 0.1997   | -1.613 |
| 93898_at   | 227.1  | 231.6  | 262.7  | 232.6  | 220.1  | 275.1  | 185.2  | 166    | 0.35223633  | 238.5    | 211.6    | 26.9    | 1.127126654 | 0.2801   | -1.146 |
| 93899_at   | 274.4  | 172.9  | 234.6  | 257.3  | 193.8  | 281.1  | 158.6  | 204.6  | 0.486264464 | 234.8    | 209.525  | 25.275  | 1.120629996 | 0.4706   | -1.128 |



|            |        |        |        |        |        |        |        |        |              |          |          |          |             |          |        |
|------------|--------|--------|--------|--------|--------|--------|--------|--------|--------------|----------|----------|----------|-------------|----------|--------|
| 93900_at   | 100.9  | 127.4  | 126.7  | 179.2  | 124.4  | 139.2  | 136.6  | 121.4  | 0.863418439  | 133.55   | 130.4    | 3.15     | 1.024156442 | 0.9735   | -1.004 |
| 93901_at   | 195.3  | 247.7  | 248.1  | 216.3  | 217.8  | 244.4  | 222    | 211    | 0.845088236  | 226.85   | 223.8    | 3.05     | 1.013628239 | 0.883    | -1.01  |
| 93902_at   | 333.9  | 348.4  | 305.3  | 293.2  | 133.4  | 313.1  | 237.4  | 270.6  | 0.120264426  | 320.2    | 238.625  | 81.575   | 1.341854374 | 0.1263   | -1.404 |
| 93903_at   | 200.4  | 420.8  | 346.2  | 328.8  | 227.3  | 346.2  | 302    | 490.5  | 0.816531741  | 324.05   | 341.5    | 17.45    | 0.948901903 | 0.8362   | -1.05  |
| 93904_f_at | 73.1   | 49.4   | 55.8   | 10.9   | 38.7   | 58.1   | 60.3   | 46.3   | 0.813671003  | 47.3     | 50.85    | 3.55     | 0.930186824 | 0.5724   | 1.301  |
| 93905_at   | 2.6    | 5.3    | 5.7    | 2.6    | 1.5    | 17.1   | 2.6    | 1.8    | 0.688633617  | 4.05     | 5.75     | 1.7      | 0.704347826 | 0.8541   | -1.121 |
| 93906_s_at | 38.4   | 32.6   | 9.7    | 32.4   | 48.4   | 41.7   | 45.5   | 27.8   | 0.1637222    | 28.275   | 40.85    | 12.575   | 0.692166463 | 0.2224   | 1.596  |
| 93907_f_at | 5324.7 | 4191   | 4003.9 | 3858.3 | 3622.1 | 5018.5 | 4724.3 | 4255.3 | 0.897782602  | 4344.475 | 4405.05  | 60.575   | 0.986248737 | 0.891    | -1.015 |
| 93908_f_at | 994.4  | 774.6  | 717.2  | 754.2  | 648.7  | 997.2  | 684.3  | 720.7  | 0.657071732  | 810.1    | 762.725  | 47.375   | 1.062112819 | 0.6013   | -1.069 |
| 93909_f_at | 3053.2 | 2513.1 | 2371.2 | 2088.5 | 1772.1 | 2980.7 | 1882.5 | 1941.4 | 0.339679657  | 2506.5   | 2144.175 | 362.325  | 1.168981077 | 0.2804   | -1.185 |
| 93910_at   | 148.6  | 123.5  | 100.2  | 120.5  | 112.5  | 142.6  | 124.2  | 151.6  | 0.500602952  | 123.2    | 132.725  | 9.525    | 0.928235073 | 0.4898   | -1.08  |
| 93911_at   | 1090.3 | 932    | 864.2  | 810.3  | 875.3  | 911.3  | 991.9  | 1089.9 | 0.599457874  | 924.2    | 967.1    | 42.9     | 0.955640575 | 0.5716   | -1.049 |
| 93912_at   | 282.4  | 619    | 533.6  | 552.3  | 271.9  | 476.5  | 341.5  | 389.5  | 0.199221852  | 496.825  | 369.85   | 126.975  | 1.343314857 | 0.2455   | -1.315 |
| 93913_at   | 70.2   | 76.7   | 72.3   | 86.3   | 96     | 66.9   | 61.2   | 108.4  | 0.604404217  | 76.375   | 83.125   | 6.75     | 0.918796992 | 0.6973   | -1.061 |
| 93914_at   | 209.2  | 188.5  | 142.9  | 156.8  | 192.2  | 168.1  | 165.6  | 258.5  | 0.4444463498 | 174.35   | 196.1    | 21.75    | 0.8890872   | 0.4376   | 1.118  |
| 93915_at   | 23.7   | 9.5    | 15.2   | 30.9   | 30.3   | 29.8   | 7.5    | 13.1   | 0.964265629  | 19.825   | 20.175   | 0.35     | 0.982651797 | 0.9159   | -1.048 |
| 93916_at   | 121.2  | 98.6   | 115.9  | 130.4  | 102.7  | 121.8  | 62.7   | 63     | 0.145618797  | 116.525  | 87.55    | 28.975   | 1.330953741 | 0.1222   | -1.383 |
| 93917_at   | 313.5  | 399.6  | 327.2  | 308.6  | 370.3  | 332.9  | 302.2  | 335.6  | 0.94077198   | 337.225  | 335.25   | 1.975    | 1.005891126 | 0.9698   | -1.003 |
| 93918_at   | 1509.6 | 1354.3 | 1590.5 | 1361.8 | 1357.8 | 1479.6 | 1161.2 | 1146.4 | 0.146377884  | 1454.05  | 1286.25  | 167.8    | 1.130456754 | 0.1372   | -1.134 |
| 93919_at   | 585    | 658.1  | 540.8  | 493.5  | 668.9  | 744    | 487.3  | 468.4  | 0.778537722  | 569.35   | 592.15   | 22.8     | 0.961496243 | 0.8533   | -1.025 |
| 93920_at   | 48.9   | 127.7  | 75.7   | 16.9   | 86     | 62.3   | 78.3   | 42.7   | 0.999260016  | 67.3     | 67.325   | 0.025    | 0.999628667 | 0.6737   | 1.224  |
| 93921_at   | 586    | 814.6  | 661.1  | 651.4  | 471    | 639.2  | 563.5  | 548.3  | 0.089357081  | 678.275  | 555.5    | 122.775  | 1.221017102 | 0.0774   | -1.219 |
| 93922_g_at | 329.8  | 1043.1 | 720.1  | 637.1  | 693.2  | 782.7  | 844.7  | 678.3  | 0.684365685  | 682.525  | 749.725  | 67.2     | 0.910367135 | 0.5159   | 1.185  |
| 93923_at   | 492.5  | 646.7  | 664.5  | 661.6  | 580.8  | 653.9  | 747    | 704.3  | 0.353076298  | 616.325  | 671.5    | 55.175   | 0.917833209 | 0.3645   | -1.093 |
| 93924_f_at | 3081.9 | 2687.5 | 3906.8 | 4114   | 1928.6 | 2818.1 | 2892.6 | 1802.8 | 0.050616212  | 3447.55  | 2360.525 | 1087.025 | 1.460501372 | 0.05138  | -1.472 |
| 93925_at   | 62.1   | 59.6   | 79.5   | 99     | 87.9   | 47.6   | 87.2   | 99.4   | 0.720144084  | 75.05    | 80.525   | 5.475    | 0.932008693 | 0.796    | -1.057 |
| 93926_at   | 8.4    | 6.5    | 17.1   | 7.6    | 58.3   | 15.9   | 16.3   | 19     | 0.189113969  | 9.9      | 27.375   | 17.475   | 0.361643836 | 0.04979  | 2.525  |
| 93927_f_at | 7.7    | 21.6   | 15.6   | 12     | 11.7   | 6.5    | 2.9    | 16.6   | 0.296567985  | 14.225   | 9.425    | 4.8      | 1.50928382  | 0.267    | -1.714 |
| 93928_f_at | 44.8   | 21.8   | 15.6   | 20.8   | 22.8   | 9.1    | 20.3   | 21.6   | 0.36499734   | 25.75    | 18.45    | 7.3      | 1.395663957 | 0.3558   | -1.366 |
| 93929_s_at | 2.1    | 6.3    | 2.7    | 10.5   | 7.8    | 6.6    | 7.4    | 9.7    | 0.298096886  | 5.4      | 7.875    | 2.475    | 0.685714286 | 0.1876   | 1.758  |
| 93930_at   | 209.9  | 278.2  | 187.3  | 434.4  | 212.6  | 300.2  | 204.8  | 321.6  | 0.792381183  | 277.45   | 259.8    | 17.65    | 1.067936875 | 0.8936   | -1.031 |
| 93931_at   | 14.4   | 14.2   | 10.5   | 13.4   | 24.8   | 12.2   | 15.8   | 11.9   | 0.393135299  | 13.125   | 16.175   | 3.05     | 0.811437403 | 0.3892   | 1.188  |
| 93932_at   | 11.7   | 12.4   | 16     | 17.8   | 14.8   | 16.4   | 16.4   | 12.9   | 0.714780447  | 14.475   | 15.125   | 0.65     | 0.957024793 | 0.6563   | -1.056 |
| 93933_at   | 107.7  | 54.8   | 125.2  | 95.6   | 107.2  | 87     | 105.9  | 112    | 0.676137213  | 95.825   | 103.025  | 7.2      | 0.93011405  | 0.574    | 1.119  |
| 93934_at   | 7.9    | 10.3   | 13.9   | 13.4   | 20.6   | 12.9   | 12.5   | 11.7   | 0.27500608   | 11.375   | 14.425   | 3.05     | 0.788561525 | 0.2519   | 1.265  |
| 93935_at   | 134.5  | 203.8  | 122.4  | 142.2  | 95.4   | 164.5  | 117.5  | 201.3  | 0.846732323  | 150.725  | 144.675  | 6.05     | 1.041817868 | 0.7652   | -1.065 |
| 93936_at   | 351.8  | 386.4  | 276.9  | 363.3  | 315.9  | 437.9  | 349.6  | 373.5  | 0.508181865  | 344.6    | 369.225  | 24.625   | 0.93330625  | 0.5124   | -1.072 |
| 93937_at   | 362.8  | 285.2  | 288.7  | 300.6  | 311.5  | 383.2  | 327    | 418.7  | 0.154732061  | 309.325  | 360.1    | 50.775   | 0.858997501 | 0.1421   | 1.162  |
| 93938_at   | 57.1   | 73.9   | 40.9   | 67.6   | 87.8   | 97     | 64.6   | 85.2   | 0.053951588  | 59.875   | 83.65    | 23.775   | 0.715780036 | 0.06856  | 1.415  |
| 93939_at   | 114.6  | 203.9  | 219    | 188.8  | 143.8  | 196.9  | 201.9  | 179.1  | 0.96731498   | 181.575  | 180.425  | 1.15     | 1.00637384  | 0.9326   | -1.015 |
| 93940_at   | 223    | 148.6  | 149    | 190.8  | 170.5  | 192.5  | 173.9  | 148.6  | 0.762472791  | 177.85   | 171.375  | 6.475    | 1.03778264  | 0.8249   | -1.026 |
| 93941_at   | 66.8   | 87.7   | 47     | 56.8   | 48.8   | 37.4   | 11.2   | 86.3   | 0.346934709  | 64.575   | 45.925   | 18.65    | 1.406096897 | 0.2709   | -1.728 |
| 93942_at   | 135.4  | 124.3  | 84.5   | 84.7   | 107.2  | 131.2  | 130.6  | 119.9  | 0.355918462  | 107.225  | 122.225  | 15       | 0.877275516 | 0.3017   | 1.163  |
| 93943_f_at | 14.3   | 8      | 17.1   | 52.3   | 10.1   | 17     | 8.2    | 7      | 0.306371867  | 22.925   | 10.575   | 12.35    | 2.1678487   | 0.2319   | -1.789 |
| 93944_r_at | 304.6  | 341.2  | 319.9  | 333.3  | 406.8  | 367.6  | 378.3  | 393.3  | 0.001933718  | 324.75   | 386.5    | 61.75    | 0.840232859 | 0.001955 | 1.19   |
| 93945_at   | 52.6   | 52.2   | 80.7   | 28.6   | 25.4   | 92     | 24.2   | 33.5   | 0.635807346  | 53.525   | 43.775   | 9.75     | 1.222729869 | 0.453    | -1.353 |
| 93946_at   | 29     | 29.6   | 53.3   | 97.2   | 30.9   | 64.9   | 27.6   | 45     | 0.600846468  | 52.275   | 42.1     | 10.175   | 1.241686461 | 0.6892   | -1.157 |
| 93947_g_at | 20.8   | 23.9   | 22     | 27.5   | 20.7   | 25.9   | 20.8   | 12     | 0.310455     | 23.55    | 19.85    | 3.7      | 1.186397985 | 0.2896   | -1.224 |
| 93948_at   | 98.6   | 137.5  | 120.1  | 123.7  | 156    | 96.8   | 131.3  | 179.9  | 0.339193327  | 119.975  | 141      | 21.025   | 0.850886525 | 0.3778   | 1.154  |
| 93949_at   | 499.7  | 405.4  | 479.5  | 382.5  | 305.3  | 505.1  | 389.6  | 452.8  | 0.602078131  | 441.775  | 413.2    | 28.575   | 1.069155373 | 0.5611   | -1.081 |
| 93950_at   | 19.8   | 24.4   | 18.6   | 21.1   | 21.8   | 23.6   | 29.2   | 20.4   | 0.28032224   | 20.975   | 23.75    | 2.775    | 0.883157895 | 0.2658   | 1.126  |
| 93951_at   | 265    | 358    | 465.3  | 359.7  | 348    | 367.1  | 342.4  | 258.6  | 0.519183514  | 362      | 329.025  | 32.975   | 1.100220348 | 0.5653   | -1.089 |
| 93952_r_at | 77.5   | 91.7   | 81.4   | 124.5  | 116.8  | 90.2   | 41.8   | 69.2   | 0.487986901  | 93.775   | 79.5     | 14.275   | 1.179559748 | 0.4116   | -1.24  |
| 93953_at   | 111.8  | 151.2  | 160.9  | 132.2  | 141.3  | 123.9  | 167.8  | 91.7   | 0.700138339  | 139.025  | 131.175  | 7.85     | 1.05984372  | 0.6488   | -1.075 |
| 93954_at   | 133.9  | 129.1  | 150.6  | 136.5  | 104.4  | 167.1  | 133.7  | 118    | 0.663890217  | 137.525  | 130.8    | 6.725    | 1.051414373 | 0.5669   | -1.066 |
| 93955_at   | 7.4    | 21.8   | 36.9   | 3.2    | 5.9    | 26.3   | 3.8    | 13.5   | 0.612028973  | 17.325   | 12.375   | 4.95     | 1.4         | 0.7618   | -1.246 |



|            |        |        |        |        |         |        |         |         |             |          |          |         |             |            |        |
|------------|--------|--------|--------|--------|---------|--------|---------|---------|-------------|----------|----------|---------|-------------|------------|--------|
| 93956_at   | 45.6   | 16.2   | 28.9   | 27.3   | 21      | 16.3   | 22.2    | 24.9    | 0.263642012 | 29.5     | 21.1     | 8.4     | 1.398104265 | 0.2684     | -1.324 |
| 93957_at   | 20.3   | 12.2   | 23.5   | 21     | 17.7    | 22.5   | 15.2    | 33.1    | 0.563882127 | 19.25    | 22.125   | 2.875   | 0.870056497 | 0.5976     | 1.132  |
| 93958_at   | 454.9  | 367.5  | 445.5  | 449.6  | 239.3   | 418.7  | 309.8   | 373.2   | 0.091505926 | 429.375  | 335.25   | 94.125  | 1.280760626 | 0.09165    | -1.304 |
| 93959_at   | 8.8    | 24.2   | 10.8   | 8      | 7.2     | 14     | 32.5    | 13.5    | 0.586008795 | 12.95    | 16.8     | 3.85    | 0.770833333 | 0.6035     | 1.245  |
| 93961_at   | 15.7   | 8.9    | 49.1   | 21.1   | 26.7    | 61.2   | 33.5    | 33.6    | 0.246068564 | 23.7     | 38.75    | 15.05   | 0.611612903 | 0.1617     | 1.887  |
| 93962_at   | 270.1  | 195.4  | 217.5  | 276.5  | 223.9   | 259.2  | 273.2   | 249.5   | 0.629796466 | 239.875  | 251.45   | 11.575  | 0.953966991 | 0.5811     | -1.057 |
| 93963_at   | 35.5   | 6.4    | 11.9   | 38.9   | 5.2     | 22.9   | 5.7     | 26      | 0.441725638 | 23.175   | 14.95    | 8.225   | 1.550167224 | 0.4939     | -1.564 |
| 93964_s_at | 466    | 436.3  | 348.3  | 799.6  | 302     | 626.5  | 206.7   | 700.9   | 0.743741733 | 512.55   | 459.025  | 53.525  | 1.116605849 | 0.6146     | -1.199 |
| 93965_r_at | 440.5  | 304.6  | 319.6  | 519.2  | 283.4   | 526.5  | 206.3   | 562.3   | 0.98996505  | 395.975  | 394.625  | 1.35    | 1.003420969 | 0.8264     | -1.065 |
| 93966_at   | 453.8  | 537.4  | 682    | 579.5  | 613.7   | 550.6  | 664.6   | 625.8   | 0.390130608 | 563.175  | 613.675  | 50.5    | 0.917708885 | 0.351      | -1.099 |
| 93967_at   | 1114.3 | 1298.5 | 1162.9 | 1194.7 | 1455.4  | 1237.1 | 1448.4  | 1359.4  | 0.031575019 | 1192.6   | 1375.075 | 182.475 | 0.867298147 | 0.02913    | 1.152  |
| 93968_at   | 4081.7 | 3084   | 3197.3 | 3471.3 | 3392.9  | 3150.3 | 3199.1  | 3076.1  | 0.344306053 | 3458.575 | 3204.6   | 253.975 | 1.079253261 | 0.3216     | -1.074 |
| 93969_at   | 16.7   | 31     | 31.3   | 63.2   | 27      | 23.6   | 70.8    | 32.2    | 0.852816818 | 35.55    | 38.4     | 2.85    | 0.92578125  | 0.8194     | -1.091 |
| 93970_at   | 560.2  | 366.1  | 470.6  | 480.6  | 416.5   | 488.3  | 498     | 530.8   | 0.775472901 | 469.375  | 483.4    | 14.025  | 0.97098676  | 0.7303     | -1.038 |
| 93971_f_at | 1831   | 1375   | 1307.7 | 1532.5 | 1388    | 1272.1 | 1413.4  | 1434.1  | 0.33819205  | 1511.55  | 1376.9   | 134.65  | 1.097792142 | 0.3198     | -1.09  |
| 93972_at   | 3504.8 | 3123.9 | 3182.6 | 3657.8 | 3226.7  | 3274.4 | 3833.6  | 3680.6  | 0.514912413 | 3367.275 | 3503.825 | 136.55  | 0.961028305 | 0.5184     | -1.04  |
| 93973_at   | 2156.3 | 2372.1 | 2230.4 | 1958.8 | 2360.1  | 2258   | 2249.6  | 2520.5  | 0.171643713 | 2179.4   | 2347.05  | 167.65  | 0.928569907 | 0.167      | -1.078 |
| 93974_at   | 452.5  | 333.5  | 491.5  | 470.2  | 342.5   | 490.9  | 326.8   | 413.3   | 0.431161083 | 436.925  | 393.375  | 43.55   | 1.110708611 | 0.435      | -1.113 |
| 93975_at   | 675.3  | 546.3  | 619.2  | 653.2  | 542.5   | 740.3  | 629.8   | 714.9   | 0.556131499 | 623.5    | 656.875  | 33.375  | 0.949191246 | 0.5903     | -1.049 |
| 93976_at   | 946.1  | 803.7  | 895.9  | 922.1  | 644.8   | 896.1  | 966.2   | 888.4   | 0.604054327 | 891.95   | 848.875  | 43.075  | 1.050743631 | 0.564      | -1.061 |
| 93978_at   | 92.1   | 141.5  | 118.4  | 115    | 129.8   | 105.1  | 118.1   | 110.9   | 0.948788337 | 116.75   | 115.975  | 0.775   | 1.006682475 | 0.9864     | -1.002 |
| 93980_at   | 331.5  | 271    | 300.1  | 265.4  | 225.7   | 218.3  | 235.5   | 341.2   | 0.315353391 | 292      | 255.175  | 36.825  | 1.144312727 | 0.2484     | -1.159 |
| 93981_at   | 776.4  | 939.9  | 763.7  | 826.5  | 565.6   | 697.1  | 540.3   | 677.1   | 0.010343302 | 826.625  | 620.025  | 206.6   | 1.33321237  | 0.01056    | -1.337 |
| 93982_at   | 656.7  | 639.5  | 681.2  | 716.6  | 650.9   | 587.3  | 716.6   | 777.3   | 0.840405096 | 673.5    | 683.025  | 9.525   | 0.986054683 | 0.8897     | -1.01  |
| 93983_at   | 941.2  | 751.7  | 921.7  | 857.4  | 725.1   | 815.3  | 769.5   | 714.7   | 0.073734742 | 868      | 756.15   | 111.85  | 1.147920386 | 0.06152    | -1.145 |
| 93984_at   | 6874.4 | 5977.2 | 5697.1 | 5376   | 6696.6  | 5048.7 | 6099.6  | 5513.5  | 0.778615553 | 5981.175 | 5839.6   | 141.575 | 1.024243955 | 0.7634     | -1.026 |
| 93985_at   | 482.3  | 359.3  | 439.1  | 241    | 276     | 522.6  | 270.7   | 444.2   | 0.980914425 | 380.425  | 378.375  | 2.05    | 1.005417906 | 0.953      | -1.014 |
| 93986_at   | 2007.4 | 2021.9 | 1829.3 | 1895.8 | 2335.8  | 1763.3 | 1721.2  | 1820.8  | 0.860824063 | 1938.6   | 1910.275 | 28.325  | 1.014827708 | 0.7808     | -1.022 |
| 93987_f_at | 8913.8 | 9599.9 | 8839.5 | 8742.8 | 16494.1 | 8448.4 | 10921.3 | 10396.8 | 0.23769041  | 9024     | 11565.15 | 2541.15 | 0.780275223 | 0.1746     | 1.244  |
| 93988_at   | 3391.4 | 2850.1 | 2929.5 | 2881.4 | 3710.5  | 2693.9 | 2882.2  | 2361.6  | 0.763199871 | 3013.1   | 2912.05  | 101.05  | 1.03470064  | 0.6751     | -1.046 |
| 93990_at   | 5554   | 5139.5 | 5024.6 | 5534.8 | 5082.4  | 5171.2 | 5116.6  | 5388.2  | 0.457296247 | 5313.225 | 5189.6   | 123.625 | 1.023821682 | 0.4572     | -1.023 |
| 93991_at   | 5685.4 | 5265.7 | 5333.4 | 5174.2 | 6022.6  | 5439.9 | 5716.3  | 5642.8  | 0.08414653  | 5364.675 | 5705.4   | 340.725 | 0.940280261 | 0.08118    | -1.063 |
| 93992_at   | 774.6  | 685.8  | 830.2  | 618.4  | 639     | 670.5  | 580.6   | 758.7   | 0.320889259 | 727.25   | 662.2    | 65.05   | 1.098233162 | 0.3239     | -1.096 |
| 93993_at   | 1285.4 | 1101.7 | 1162   | 1042.4 | 1149.3  | 1198.3 | 1157.1  | 954.7   | 0.67615747  | 1147.875 | 1114.85  | 33.025  | 1.029622819 | 0.674      | -1.03  |
| 93994_at   | 504.6  | 547    | 525.3  | 550.5  | 308.2   | 337.5  | 303.5   | 337.6   | 6.79246E-06 | 531.85   | 321.7    | 210.15  | 1.653248368 | 0.00000716 | -1.655 |
| 93996_at   | 157.8  | 170.7  | 185.4  | 192.2  | 129.4   | 190.4  | 127.7   | 189.3   | 0.418982649 | 176.525  | 159.2    | 17.325  | 1.108825377 | 0.3631     | -1.126 |
| 93997_at   | 1490.1 | 1195.5 | 1480.5 | 1470.6 | 1181.3  | 1553.8 | 1497.2  | 1517.4  | 0.809348123 | 1409.175 | 1437.425 | 28.25   | 0.980346801 | 0.8353     | -1.018 |
| 93999_at   | 6492   | 4423.2 | 5384.1 | 5172.3 | 5526.9  | 4971.1 | 6165.1  | 4791.8  | 0.993970906 | 5367.9   | 5363.725 | 4.175   | 1.000778377 | 0.9708     | -1.004 |
| 94000_at   | 233.3  | 332.5  | 281.6  | 381.2  | 330.9   | 378    | 454.9   | 377.3   | 0.107459684 | 307.15   | 385.275  | 78.125  | 0.797222763 | 0.1063     | 1.267  |
| 94001_at   | 2016.7 | 1705   | 1924.9 | 2130.8 | 1349.1  | 1657.1 | 1691.3  | 2031.5  | 0.174025599 | 1944.35  | 1682.25  | 262.1   | 1.15580324  | 0.1655     | -1.164 |
| 94002_at   | 1586.1 | 1599.2 | 1538.8 | 1688.3 | 1651.5  | 1645   | 1760    | 1697.6  | 0.083429624 | 1603.1   | 1688.525 | 85.425  | 0.949408507 | 0.08088    | -1.053 |
| 94003_at   | 1925.9 | 1894.4 | 1744.3 | 2012.9 | 1240.3  | 1657.3 | 1611.2  | 1749.6  | 0.052295545 | 1894.375 | 1564.6   | 329.775 | 1.210772721 | 0.05242    | -1.219 |
| 94004_at   | 1391.7 | 1428.3 | 1330.4 | 1462.9 | 1015    | 1215.6 | 1102.2  | 1388.7  | 0.063949156 | 1403.325 | 1180.375 | 222.95  | 1.188880652 | 0.04381    | -1.196 |
| 94005_at   | 951.7  | 724.4  | 912.3  | 950.5  | 924.1   | 958.6  | 1010.4  | 973.9   | 0.230760456 | 884.725  | 966.75   | 82.025  | 0.915153866 | 0.2144     | -1.099 |
| 94006_at   | 149.6  | 105.5  | 108    | 70.7   | 105.2   | 128    | 154.4   | 101.9   | 0.518344819 | 108.45   | 122.375  | 13.925  | 0.886210419 | 0.465      | 1.152  |
| 94007_at   | 8950   | 8474.9 | 8029.1 | 9165.7 | 8181.7  | 7553.9 | 8008.5  | 10010.1 | 0.734246208 | 8654.925 | 8438.55  | 216.375 | 1.025641254 | 0.6762     | -1.03  |
| 94008_at   | 1996.7 | 1302.5 | 1310   | 1380.6 | 1042.5  | 1414.4 | 1054.5  | 1112.7  | 0.136491683 | 1497.45  | 1156.025 | 341.425 | 1.295343959 | 0.09182    | -1.284 |
| 94009_at   | 536.5  | 426.3  | 582.1  | 518.6  | 366.7   | 512.3  | 557     | 533.2   | 0.678223796 | 515.875  | 492.3    | 23.575  | 1.047887467 | 0.6629     | -1.055 |
| 94010_g_at | 277.2  | 191.1  | 177.8  | 249    | 167.1   | 220.6  | 153.1   | 143.7   | 0.125773983 | 223.775  | 171.125  | 52.65   | 1.307669832 | 0.1101     | -1.304 |
| 94011_at   | 1060.4 | 1517.7 | 1280   | 1248.4 | 1598.1  | 1139.9 | 1355.9  | 1279.8  | 0.636409711 | 1276.625 | 1343.425 | 66.8    | 0.950276346 | 0.6299     | -1.053 |
| 94012_at   | 178.1  | 147.7  | 153.1  | 197.3  | 206     | 146.7  | 148.3   | 91.1    | 0.462582822 | 169.05   | 148.025  | 21.025  | 1.142036818 | 0.3931     | -1.181 |
| 94014_at   | 3164.4 | 2278.9 | 2279.1 | 2921.7 | 1705.1  | 1999.5 | 2487.4  | 2347.7  | 0.119018596 | 2661.025 | 2134.925 | 526.1   | 1.246425518 | 0.1165     | -1.246 |
| 94015_at   | 638.7  | 548.3  | 663.3  | 675    | 641.4   | 646    | 669.9   | 799.1   | 0.267574652 | 631.325  | 689.1    | 57.775  | 0.916158758 | 0.262      | -1.091 |
| 94016_at   | 107.3  | 83.8   | 74.3   | 144.2  | 154.9   | 63.1   | 70.5    | 117.8   | 0.976315307 | 102.4    | 101.575  | 0.825   | 1.008122077 | 0.8727     | -1.044 |
| 94017_s_at | 5725.1 | 7701.3 | 6225.3 | 6211.6 | 6669.9  | 6109.9 | 6524.2  | 6443.4  | 0.951569715 | 6465.825 | 6436.85  | 28.975  | 1.004501425 | 0.9863     | -1.001 |
| 94018_at   | 1642   | 2374.8 | 1718   | 2220.1 | 1391.3  | 1920   | 1649.6  | 2194.3  | 0.45590319  | 1988.725 | 1788.8   | 199.925 | 1.11176487  | 0.4538     | -1.114 |



|            |         |         |         |         |         |         |         |         |             |           |          |         |             |         |        |
|------------|---------|---------|---------|---------|---------|---------|---------|---------|-------------|-----------|----------|---------|-------------|---------|--------|
| 94019_at   | 2048.4  | 1278.5  | 1575.6  | 1560    | 1000.1  | 1499.1  | 1356.7  | 1707.5  | 0.342912524 | 1615.625  | 1390.85  | 224.775 | 1.161609807 | 0.3416  | -1.167 |
| 94020_at   | 1433.8  | 1176.4  | 1413.5  | 1027.5  | 1507.6  | 1480.8  | 1406.2  | 1226.4  | 0.274615054 | 1262.8    | 1405.25  | 142.45  | 0.898630137 | 0.2665  | 1.12   |
| 94021_at   | 390.2   | 470.6   | 414.6   | 482.2   | 394.2   | 422.7   | 402     | 537.5   | 0.994292746 | 439.4     | 439.1    | 0.3     | 1.000683216 | 0.9572  | -1.005 |
| 94022_at   | 857.5   | 1121.6  | 1150    | 1132.9  | 1479.9  | 1002.4  | 1331.9  | 1079.8  | 0.280378526 | 1065.5    | 1223.5   | 158     | 0.87086228  | 0.2894  | 1.142  |
| 94024_at   | 619     | 1085.5  | 823.2   | 929     | 624.1   | 736.5   | 768     | 839.6   | 0.317156169 | 864.175   | 742.05   | 122.125 | 1.164577859 | 0.3443  | -1.148 |
| 94025_at   | 3603.4  | 3485.5  | 3303.1  | 3298.2  | 5241.6  | 2628.5  | 3252.9  | 2702    | 0.959700006 | 3422.55   | 3456.25  | 33.7    | 0.990249548 | 0.8559  | -1.031 |
| 94026_at   | 146.8   | 200.6   | 135.6   | 149.1   | 192.7   | 150.8   | 173.4   | 228.5   | 0.244677965 | 158.025   | 186.35   | 28.325  | 0.848001073 | 0.2282  | 1.179  |
| 94027_at   | 89.8    | 112.4   | 147.5   | 153.3   | 185.8   | 138.4   | 96.8    | 249.6   | 0.307228149 | 125.75    | 167.65   | 41.9    | 0.75007456  | 0.3343  | 1.284  |
| 94028_f_at | 31.5    | 32.3    | 39.2    | 34.2    | 43.8    | 37.8    | 50.4    | 42.5    | 0.028985819 | 34.3      | 43.625   | 9.325   | 0.786246418 | 0.02086 | 1.27   |
| 94030_at   | 1144.3  | 959.2   | 949.9   | 857.6   | 1130.3  | 982.5   | 1005    | 820.1   | 0.941285468 | 977.75    | 984.475  | 6.725   | 0.993168948 | 0.95    | -1.006 |
| 94031_at   | 2476.9  | 1898.6  | 2011.8  | 2404.2  | 1327.4  | 2124.6  | 1668.2  | 1531.2  | 0.053182999 | 2197.875  | 1662.85  | 535.025 | 1.321751812 | 0.0513  | -1.333 |
| 94032_at   | 2887    | 3197.6  | 2858.7  | 2609.5  | 3919.7  | 2802    | 2960.7  | 2421.4  | 0.70748163  | 2888.2    | 3025.95  | 137.75  | 0.954477106 | 0.7692  | -1.034 |
| 94034_at   | 338.9   | 321.5   | 390.4   | 402.7   | 486.2   | 386.5   | 419.3   | 460.6   | 0.04506949  | 363.375   | 438.15   | 74.775  | 0.829339267 | 0.04496 | 1.207  |
| 94035_at   | 13.6    | 24.8    | 13.1    | 34.2    | 10.1    | 9.9     | 7.3     | 11      | 0.098808434 | 21.425    | 9.575    | 11.85   | 2.237597911 | 0.02608 | -2.089 |
| 94036_at   | 559.3   | 703.7   | 606.5   | 628.9   | 572.2   | 518.4   | 589.3   | 558.9   | 0.119380705 | 624.6     | 559.7    | 64.9    | 1.115954976 | 0.09863 | -1.113 |
| 94037_at   | 140.3   | 135.8   | 210.8   | 144.5   | 216.5   | 171.1   | 192.8   | 225.6   | 0.095314553 | 157.85    | 201.5    | 43.65   | 0.78337469  | 0.07808 | 1.291  |
| 94038_at   | 2774.6  | 2384.1  | 2383.3  | 2650.3  | 2231.2  | 2436    | 1969.4  | 2632.6  | 0.235521548 | 2548.075  | 2317.3   | 230.775 | 1.099587882 | 0.2268  | -1.104 |
| 94039_at   | 20.7    | 22.3    | 56      | 32.9    | 18.4    | 25.7    | 20.3    | 14.6    | 0.203427763 | 32.975    | 19.75    | 13.225  | 1.669620253 | 0.1309  | -1.567 |
| 94040_at   | 6589.6  | 6592.8  | 6249    | 5786.5  | 8383.7  | 6921.5  | 5861.6  | 5280.6  | 0.689599165 | 6304.475  | 6611.85  | 307.375 | 0.953511498 | 0.7621  | -1.034 |
| 94041_at   | 2760.1  | 2464.2  | 2757    | 2338.7  | 2221.3  | 2894.4  | 2571.2  | 2491    | 0.845944891 | 2580      | 2544.475 | 35.525  | 1.013961623 | 0.8257  | -1.016 |
| 94042_f_at | 11844.3 | 10375.5 | 10954.3 | 11305.1 | 12166.8 | 10747.2 | 11231.5 | 11847.9 | 0.424715904 | 11119.8   | 11498.35 | 378.55  | 0.967077885 | 0.4263  | -1.034 |
| 94043_at   | 913.8   | 994.1   | 974.7   | 1003.8  | 755.2   | 1071.3  | 912.3   | 1066.1  | 0.808115875 | 971.6     | 951.225  | 20.375  | 1.021419748 | 0.7328  | -1.031 |
| 94044_at   | 358.6   | 386     | 277.5   | 384.6   | 236.1   | 314     | 221.7   | 356.9   | 0.143651977 | 351.675   | 282.175  | 69.5    | 1.246301054 | 0.1449  | -1.26  |
| 94045_at   | 7.3     | 3.9     | 6.4     | 6       | 6.2     | 8.8     | 4       | 5.2     | 0.908779339 | 5.9       | 6.05     | 0.15    | 0.975206612 | 0.9465  | -1.015 |
| 94046_at   | 237.5   | 507.1   | 315.4   | 391.7   | 253     | 381.6   | 336.5   | 447.4   | 0.910490538 | 362.925   | 354.625  | 8.3     | 1.023405005 | 0.9778  | -1.006 |
| 94047_at   | 1634.4  | 1506.5  | 1588.5  | 1410.1  | 1519.6  | 1664    | 1491.2  | 1588.6  | 0.639282914 | 1534.875  | 1565.85  | 30.975  | 0.980218412 | 0.63    | -1.021 |
| 94048_at   | 432.8   | 603.3   | 516.1   | 556.6   | 557.5   | 591.9   | 626.8   | 372.6   | 0.887440296 | 527.2     | 537.2    | 10      | 0.981384959 | 0.9628  | -1.007 |
| 94049_at   | 15.6    | 40.1    | 47.7    | 41.8    | 44.8    | 54.9    | 62.4    | 46.5    | 0.112811396 | 36.3      | 52.15    | 15.85   | 0.696069032 | 0.1554  | 1.546  |
| 94051_at   | 2.3     | 4.4     | 2.8     | 11.9    | 11.9    | 22.9    | 1.7     | 14.3    | 0.200508861 | 5.35      | 12.7     | 7.35    | 0.421259843 | 0.3161  | 2.098  |
| 94052_at   | 1174.1  | 1051.3  | 1174.6  | 1078    | 1149.5  | 1089.4  | 1304.8  | 1139.2  | 0.404408178 | 1119.5    | 1170.725 | 51.225  | 0.956245062 | 0.4     | -1.045 |
| 94053_at   | 74.4    | 63.4    | 124.6   | 127.4   | 44.6    | 57.1    | 67.8    | 82.4    | 0.130151163 | 97.45     | 62.975   | 34.475  | 1.54743946  | 0.1094  | -1.514 |
| 94054_at   | 2609.6  | 2819.6  | 2819.8  | 2537.9  | 2336.4  | 2647.9  | 2941.4  | 2708.9  | 0.802648928 | 2696.725  | 2658.65  | 38.075  | 1.014321178 | 0.7729  | -1.017 |
| 94055_at   | 503     | 439.3   | 541.4   | 656.8   | 401.9   | 515.8   | 428.7   | 522.1   | 0.268305064 | 535.125   | 467.125  | 68      | 1.145571314 | 0.263   | -1.141 |
| 94056_at   | 319.3   | 194.7   | 192.7   | 154.9   | 205.6   | 296.8   | 241.7   | 214.2   | 0.584901172 | 215.4     | 239.575  | 24.175  | 0.899092142 | 0.473   | 1.142  |
| 94057_g_at | 99.3    | 70.7    | 61.7    | 70.9    | 51.1    | 138.8   | 128.2   | 127     | 0.178719789 | 75.65     | 111.275  | 35.625  | 0.679847225 | 0.2463  | 1.392  |
| 94058_r_at | 30.3    | 12.7    | 36      | 20.2    | 75      | 13.2    | 45.8    | 19.4    | 0.421035764 | 24.8      | 38.35    | 13.55   | 0.646675359 | 0.555   | 1.333  |
| 94059_at   | 1065.6  | 1073.7  | 1152.9  | 1079.3  | 1213.4  | 1046.8  | 1276.4  | 1327.1  | 0.134731555 | 1092.875  | 1215.925 | 123.05  | 0.898801324 | 0.1098  | 1.109  |
| 94060_at   | 1080.5  | 863.7   | 957.6   | 939.9   | 711.7   | 970.1   | 841.1   | 801.5   | 0.115597481 | 960.425   | 831.1    | 129.325 | 1.155607027 | 0.1108  | -1.159 |
| 94061_at   | 1126.7  | 878.2   | 859.5   | 715.4   | 1113.1  | 808.4   | 760.3   | 643.1   | 0.64584851  | 894.95    | 831.225  | 63.725  | 1.07666396  | 0.6033  | -1.084 |
| 94062_at   | 4387.4  | 3797.3  | 3875.8  | 4065.6  | 5116.4  | 3629.8  | 4069.1  | 3542.9  | 0.887688096 | 4031.525  | 4089.55  | 58.025  | 0.985811397 | 0.9583  | -1.005 |
| 94063_at   | 176.8   | 272.1   | 314.9   | 181.3   | 363.1   | 308.7   | 393.9   | 308.6   | 0.044350325 | 236.275   | 343.575  | 107.3   | 0.687695554 | 0.04384 | 1.492  |
| 94064_at   | 238.1   | 292.5   | 329.2   | 345     | 281.5   | 294.9   | 284.1   | 246.1   | 0.396544567 | 301.2     | 276.65   | 24.55   | 1.088740286 | 0.4304  | -1.081 |
| 94065_at   | 18.1    | 14.3    | 12.1    | 43.2    | 6.6     | 19.8    | 6.4     | 16.7    | 0.293246099 | 21.925    | 12.375   | 9.55    | 1.771717172 | 0.2162  | -1.768 |
| 94066_at   | 2053.2  | 1812.3  | 2185    | 1989.3  | 1518.6  | 1961.6  | 1887.8  | 1787.7  | 0.127477444 | 2009.95   | 1788.925 | 221.025 | 1.123551854 | 0.1335  | -1.126 |
| 94067_at   | 798.5   | 830     | 898.5   | 645.4   | 941.9   | 728.3   | 727.3   | 698     | 0.812981554 | 793.1     | 773.875  | 19.225  | 1.024842513 | 0.8104  | -1.025 |
| 94068_at   | 15431.2 | 15823.8 | 13676   | 14405.1 | 17235.7 | 13134.5 | 14528.4 | 14836.2 | 0.923270337 | 14834.025 | 14933.7  | 99.675  | 0.993325499 | 0.9583  | -1.004 |
| 94069_r_at | 26.9    | 21.5    | 21.8    | 39      | 19.4    | 44.2    | 40.5    | 34.9    | 0.320034025 | 27.3      | 34.75    | 7.45    | 0.785611511 | 0.3707  | 1.251  |
| 94070_at   | 0.9     | 0.7     | 3       | 1.2     | 2.7     | 1.6     | 4.3     | 1.6     | 0.233783799 | 1.45      | 2.55     | 1.1     | 0.568627451 | 0.1645  | 1.86   |
| 94071_at   | 1136.5  | 1015.5  | 1214.8  | 1028.8  | 1076.9  | 1002.4  | 984.4   | 1061.3  | 0.260577965 | 1098.9    | 1031.25  | 67.65   | 1.0656      | 0.2451  | -1.063 |
| 94072_g_at | 1035.6  | 966.2   | 1198.9  | 1031.5  | 776.7   | 1011.7  | 984.7   | 996.4   | 0.171684636 | 1058.05   | 942.375  | 115.675 | 1.122748375 | 0.1785  | -1.126 |
| 94073_at   | 3379.3  | 2673    | 3408.7  | 2818    | 2922.6  | 2737.2  | 3477.4  | 2748.2  | 0.715439144 | 3069.75   | 2971.35  | 98.4    | 1.03311626  | 0.7185  | -1.032 |
| 94074_at   | 17.4    | 65.6    | 22.3    | 67.1    | 147.7   | 73.6    | 21.4    | 49.8    | 0.371840176 | 43.1      | 73.125   | 30.025  | 0.589401709 | 0.4061  | 1.614  |
| 94075_at   | 3.9     | 13      | 4.5     | 3.6     | 6.9     | 7.3     | 5.6     | 3.6     | 0.876452299 | 6.25      | 5.85     | 0.4     | 1.068376068 | 0.867   | -1.061 |
| 94076_i_at | 1258.2  | 1325.3  | 883.1   | 1062.7  | 693.9   | 1228.7  | 1095.5  | 1054.1  | 0.480739469 | 1132.325  | 1018.05  | 114.275 | 1.112248907 | 0.4828  | -1.123 |
| 94077_f_at | 2467.9  | 2310.2  | 1935.1  | 2212.3  | 2461.9  | 2148.8  | 2229.8  | 2184.2  | 0.858588429 | 2231.375  | 2256.175 | 24.8    | 0.989007945 | 0.8289  | -1.014 |
| 94078_at   | 3712.6  | 3517.5  | 3722.1  | 3140.3  | 5373.7  | 3005.4  | 4084.9  | 3258.4  | 0.50713483  | 3523.125  | 3930.6   | 407.475 | 0.896332621 | 0.553   | -1.089 |



|            |        |        |        |        |        |        |        |        |             |         |          |         |             |          |        |
|------------|--------|--------|--------|--------|--------|--------|--------|--------|-------------|---------|----------|---------|-------------|----------|--------|
| 94079_at   | 168.8  | 157.7  | 175.9  | 178.9  | 225.9  | 226.4  | 245.2  | 213.6  | 0.00057381  | 170.325 | 227.775  | 57.45   | 0.747777412 | 0.000342 | 1.337  |
| 94080_at   | 508.9  | 471.6  | 487.7  | 480.2  | 370.3  | 548.6  | 491.3  | 463.7  | 0.655352809 | 487.1   | 468.475  | 18.625  | 1.039756657 | 0.5858   | -1.05  |
| 94081_at   | 1705.6 | 1937.2 | 2017.2 | 2092.2 | 1598.9 | 2288   | 1818.5 | 1633.9 | 0.592066907 | 1938.05 | 1834.825 | 103.225 | 1.056258771 | 0.5292   | -1.064 |
| 94084_at   | 1440.1 | 1186.2 | 1375.5 | 1302.4 | 1711.2 | 1139.9 | 1317.8 | 1403.9 | 0.634622367 | 1326.05 | 1393.2   | 67.15   | 0.951801608 | 0.6766   | -1.042 |
| 94085_at   | 49.1   | 50.2   | 46.6   | 47.5   | 84.3   | 47     | 27.9   | 55.2   | 0.685047729 | 48.35   | 53.6     | 5.25    | 0.902052239 | 0.9072   | -1.028 |
| 94086_at   | 34.2   | 67.1   | 38.6   | 27.6   | 53     | 23.1   | 76.9   | 94.6   | 0.313715807 | 41.875  | 61.9     | 20.025  | 0.676494346 | 0.4085   | 1.382  |
| 94087_at   | 190.1  | 234.1  | 266.8  | 218.2  | 165.8  | 226.3  | 190.3  | 207.2  | 0.19761107  | 227.3   | 197.4    | 29.9    | 1.151469098 | 0.1981   | -1.15  |
| 94088_at   | 477.1  | 372.5  | 446.1  | 377.7  | 219.3  | 528.9  | 376.5  | 431.7  | 0.696744397 | 418.35  | 389.1    | 29.25   | 1.075173477 | 0.5803   | -1.123 |
| 94089_at   | 8.1    | 6.9    | 20.1   | 6.4    | 10.6   | 8.9    | 9.6    | 12.5   | 0.994475107 | 10.375  | 10.4     | 0.025   | 0.997596154 | 0.6881   | 1.122  |
| 94090_at   | 56.3   | 39.7   | 21.1   | 21.2   | 84.8   | 17.1   | 52.1   | 51     | 0.350926455 | 34.575  | 51.25    | 16.675  | 0.674634146 | 0.4494   | 1.4    |
| 94095_at   | 59.7   | 42.7   | 64.5   | 131.3  | 69     | 66.3   | 76     | 67.4   | 0.819333037 | 74.55   | 69.675   | 4.875   | 1.069967707 | 0.9325   | -1.021 |
| 94097_at   | 321.5  | 449.6  | 375.1  | 415.6  | 458.4  | 511.9  | 493    | 513.3  | 0.024676908 | 390.45  | 494.15   | 103.7   | 0.790144693 | 0.01997  | 1.274  |
| 94098_at   | 74.8   | 68.4   | 74.3   | 89     | 150.9  | 69.3   | 129.1  | 115.3  | 0.102784809 | 76.625  | 116.15   | 39.525  | 0.659707275 | 0.075    | 1.465  |
| 94099_at   | 227.4  | 197.1  | 158.4  | 204.6  | 172.6  | 213.1  | 202    | 148.3  | 0.55327552  | 196.875 | 184      | 12.875  | 1.069972826 | 0.5581   | -1.072 |
| 94100_s_at | 57.8   | 42.7   | 52.5   | 71.9   | 59.8   | 98.6   | 59.7   | 78.6   | 0.164593896 | 56.225  | 74.175   | 17.95   | 0.758004719 | 0.1444   | 1.313  |
| 94101_at   | 34.7   | 40.3   | 69.8   | 96.5   | 139    | 86.8   | 122.3  | 60.4   | 0.117626595 | 60.325  | 102.125  | 41.8    | 0.590697674 | 0.1132   | 1.753  |
| 94102_at   | 12.2   | 10.1   | 20.8   | 17     | 17.4   | 26.6   | 46.9   | 13.1   | 0.243828545 | 15.025  | 26       | 10.975  | 0.577884615 | 0.1946   | 1.6    |
| 94103_at   | 19.5   | 25.1   | 43.9   | 14.8   | 13.9   | 19.9   | 26.3   | 32.4   | 0.734451314 | 25.825  | 23.125   | 2.7     | 1.116756757 | 0.8051   | -1.079 |
| 94104_at   | 138.5  | 147.7  | 199.1  | 152.6  | 162.2  | 195.2  | 166.3  | 166.7  | 0.43838705  | 159.475 | 172.6    | 13.125  | 0.923957126 | 0.3765   | -1.09  |
| 94105_at   | 5184.3 | 4155.4 | 5175.4 | 4225.7 | 4011.7 | 3776.4 | 4690.4 | 3951.2 | 0.154909065 | 4685.2  | 4107.425 | 577.775 | 1.140665989 | 0.1452   | -1.138 |
| 94106_at   | 661.8  | 720    | 633.9  | 738.9  | 675.1  | 800.5  | 695.6  | 871.1  | 0.230902686 | 688.65  | 760.575  | 71.925  | 0.905433389 | 0.2193   | -1.101 |
| 94107_at   | 43.7   | 12.9   | 33.8   | 48.2   | 28.1   | 70.1   | 86.7   | 58.8   | 0.131565181 | 34.65   | 60.925   | 26.275  | 0.568732048 | 0.1748   | 1.818  |
| 94108_at   | 19.6   | 38.5   | 35.6   | 37.2   | 59.6   | 31     | 17.9   | 34.7   | 0.767146651 | 32.725  | 35.8     | 3.075   | 0.914106145 | 0.9134   | -1.034 |
| 94109_at   | 384.8  | 525    | 366.9  | 532    | 382.3  | 396.5  | 342.6  | 575.7  | 0.696511187 | 452.175 | 424.275  | 27.9    | 1.065759236 | 0.6607   | -1.072 |
| 94110_f_at | 1069.1 | 576.1  | 701.5  | 859.3  | 871.9  | 832.1  | 824.6  | 857.3  | 0.701804007 | 801.5   | 846.475  | 44.975  | 0.946867893 | 0.5675   | -1.084 |
| 94111_r_at | 476.7  | 357    | 408.6  | 394.8  | 469.2  | 418.3  | 366.5  | 349.3  | 0.826332999 | 409.275 | 400.825  | 8.45    | 1.021081519 | 0.8127   | -1.022 |
| 94112_at   | 23.9   | 18.2   | 15.8   | 28.5   | 27.3   | 41.4   | 7.4    | 19.3   | 0.784554109 | 21.6    | 23.85    | 2.25    | 0.905660377 | 0.905    | -1.05  |
| 94113_at   | 76.5   | 116.7  | 66.8   | 106.8  | 100.7  | 99.2   | 101    | 167.7  | 0.268564405 | 91.7    | 117.15   | 25.45   | 0.782757149 | 0.2349   | 1.277  |
| 94114_at   | 29.9   | 39.8   | 14.1   | 117.1  | 63.3   | 41.5   | 44.9   | 11.4   | 0.713091887 | 50.225  | 40.275   | 9.95    | 1.247051521 | 0.8746   | -1.1   |
| 94115_at   | 4.2    | 9.1    | 3.6    | 5.5    | 5.5    | 7.3    | 7.6    | 3      | 0.882782889 | 5.6     | 5.85     | 0.25    | 0.957264957 | 0.8977   | -1.04  |
| 94116_at   | 8.1    | 28.2   | 10.1   | 36.7   | 12.3   | 24.5   | 37.1   | 12.9   | 0.92246101  | 20.775  | 21.7     | 0.925   | 0.957373272 | 0.7808   | 1.143  |
| 94117_f_at | 226.4  | 302.4  | 322.9  | 325.1  | 377.1  | 347.5  | 374.5  | 427.2  | 0.025058391 | 294.2   | 381.575  | 87.375  | 0.771014873 | 0.03123  | 1.307  |
| 94118_r_at | 114.5  | 142.4  | 158.8  | 140.1  | 197.4  | 138.5  | 163.4  | 123.2  | 0.413413333 | 138.95  | 155.625  | 16.675  | 0.892851406 | 0.4284   | 1.11   |
| 94119_at   | 34.5   | 35.4   | 47.1   | 31.4   | 45.5   | 35.5   | 41.2   | 26.2   | 1           | 37.1    | 37.1     | 0       | 1           | 0.9514   | -1.009 |
| 94120_s_at | 34.9   | 48.6   | 30.4   | 46     | 42.8   | 38     | 32     | 28.5   | 0.424543366 | 39.975  | 35.325   | 4.65    | 1.13163482  | 0.4448   | -1.124 |
| 94121_at   | 47.7   | 29.7   | 66.7   | 47.6   | 41.4   | 12     | 44.3   | 63     | 0.574118895 | 47.925  | 40.175   | 7.75    | 1.192906036 | 0.488    | -1.342 |
| 94122_at   | 290.7  | 325.3  | 332.5  | 255.8  | 439    | 447.5  | 363.6  | 445.8  | 0.003938782 | 301.075 | 423.975  | 122.9   | 0.710124418 | 0.004624 | 1.411  |
| 94123_at   | 8.5    | 4.1    | 9.8    | 6.1    | 9.5    | 3      | 5.1    | 3.2    | 0.367394438 | 7.125   | 5.2      | 1.925   | 1.370192308 | 0.2988   | -1.451 |
| 94124_at   | 317.5  | 330.3  | 281.9  | 370.9  | 292.2  | 294.3  | 330.6  | 357.1  | 0.793507326 | 325.15  | 318.55   | 6.6     | 1.020718882 | 0.8042   | -1.02  |
| 94125_at   | 45.8   | 75.3   | 44.6   | 46.1   | 27.6   | 51.6   | 46.1   | 82     | 0.936851826 | 52.95   | 51.825   | 1.125   | 1.02170767  | 0.7952   | -1.072 |
| 94126_at   | 51.4   | 33.1   | 42.5   | 15.7   | 41.5   | 22     | 28     | 18.4   | 0.410481781 | 35.675  | 27.475   | 8.2     | 1.298453139 | 0.5065   | -1.248 |
| 94127_at   | 131    | 94.8   | 100.5  | 184.4  | 72.8   | 105.3  | 116.5  | 140.8  | 0.481728569 | 127.675 | 108.85   | 18.825  | 1.172944419 | 0.49     | -1.163 |
| 94128_at   | 24.1   | 54.3   | 36.5   | 47.8   | 22     | 12.2   | 22     | 20     | 0.040766219 | 40.675  | 19.05    | 21.625  | 2.135170604 | 0.01787  | -2.094 |
| 94129_at   | 22.9   | 7.8    | 26.3   | 8.1    | 7.9    | 15.6   | 7.2    | 39.5   | 0.892583495 | 16.275  | 17.55    | 1.275   | 0.927350427 | 0.9697   | -1.02  |
| 94130_at   | 10.5   | 10.6   | 19.5   | 17     | 37.3   | 14     | 22     | 13.6   | 0.288779012 | 14.4    | 21.725   | 7.325   | 0.66283084  | 0.2562   | 1.432  |
| 94131_at   | 29.9   | 34     | 46.7   | 68.5   | 28.5   | 40.5   | 26.6   | 32.1   | 0.239976736 | 44.775  | 31.925   | 12.85   | 1.402505873 | 0.1991   | -1.348 |
| 94132_at   | 606.5  | 564.4  | 550.4  | 671.5  | 622    | 545.2  | 430.9  | 723.3  | 0.804023639 | 598.2   | 580.35   | 17.85   | 1.030757302 | 0.7168   | -1.046 |
| 94133_r_at | 47.5   | 51.4   | 48.6   | 53.5   | 28.2   | 57.2   | 50.9   | 24.3   | 0.305488009 | 50.25   | 40.15    | 10.1    | 1.251556663 | 0.2248   | -1.337 |
| 94134_at   | 136.9  | 147.7  | 162    | 87.8   | 110.2  | 171.7  | 163.8  | 168.4  | 0.394182057 | 133.6   | 153.525  | 19.925  | 0.870216577 | 0.4199   | 1.161  |
| 94135_at   | 247.6  | 317.3  | 265.7  | 350.2  | 224    | 301.9  | 277.8  | 356.1  | 0.889332994 | 295.2   | 289.95   | 5.25    | 1.01810657  | 0.8646   | -1.023 |
| 94136_at   | 20.7   | 20.7   | 14.5   | 17.8   | 35.8   | 30.8   | 12.8   | 17.5   | 0.369098679 | 18.425  | 24.225   | 5.8     | 0.760577915 | 0.4571   | 1.224  |
| 94137_at   | 39     | 27.2   | 10.1   | 33.8   | 37     | 43.4   | 28.7   | 37.4   | 0.257416618 | 27.525  | 36.625   | 9.1     | 0.751535836 | 0.2637   | 1.479  |
| 94138_s_at | 116.6  | 76.5   | 143.7  | 119.5  | 125.5  | 122    | 124.4  | 110.3  | 0.679304366 | 114.075 | 120.55   | 6.475   | 0.946287847 | 0.5844   | -1.082 |
| 94139_at   | 21.3   | 30.1   | 4.6    | 34     | 20.8   | 6.1    | 24.2   | 22.5   | 0.618708654 | 22.5    | 18.4     | 4.1     | 1.222826087 | 0.8806   | -1.093 |
| 94140_at   | 17     | 44.8   | 8      | 44.4   | 55.9   | 32.1   | 23.7   | 33.6   | 0.532818715 | 28.55   | 36.325   | 7.775   | 0.785960083 | 0.3943   | 1.515  |
| 94141_at   | 13.6   | 33     | 44.9   | 8.1    | 24.2   | 31.2   | 11.5   | 12.6   | 0.63034525  | 24.9    | 19.875   | 5.025   | 1.252830189 | 0.84     | -1.103 |



|            |       |       |       |       |       |       |       |       |             |         |         |         |             |          |        |
|------------|-------|-------|-------|-------|-------|-------|-------|-------|-------------|---------|---------|---------|-------------|----------|--------|
| 94142_at   | 241.4 | 220.7 | 227.5 | 271.5 | 188.6 | 204.1 | 220.7 | 248.8 | 0.199364215 | 240.275 | 215.55  | 24.725  | 1.114706565 | 0.1886   | -1.117 |
| 94143_at   | 9.2   | 31.6  | 7.2   | 8.3   | 39    | 7.7   | 9.3   | 11    | 0.787667648 | 14.075  | 16.75   | 2.675   | 0.840298507 | 0.7891   | 1.15   |
| 94144_g_at | 109.9 | 28.9  | 137.4 | 79.2  | 81    | 117.9 | 90.8  | 137.6 | 0.530875998 | 88.85   | 106.825 | 17.975  | 0.831734145 | 0.4285   | 1.363  |
| 94145_at   | 32.6  | 29.7  | 38.2  | 47.3  | 66.1  | 40.1  | 10.3  | 33.3  | 0.969232908 | 36.95   | 37.45   | 0.5     | 0.986648865 | 0.7011   | -1.178 |
| 94146_at   | 18.6  | 16.9  | 15.1  | 18    | 20.3  | 7.2   | 20    | 17.5  | 0.793393605 | 17.15   | 16.25   | 0.9     | 1.055384615 | 0.6315   | -1.136 |
| 94147_at   | 32.5  | 47.7  | 43.3  | 51.6  | 4.6   | 49.5  | 54.6  | 33.4  | 0.531063033 | 43.775  | 35.525  | 8.25    | 1.232230823 | 0.4016   | -1.697 |
| 94148_at   | 51.2  | 39.1  | 34.9  | 81.8  | 83.5  | 34.2  | 29.4  | 82.7  | 0.766269873 | 51.75   | 57.45   | 5.7     | 0.90078329  | 0.8919   | -1.049 |
| 94149_at   | 83.3  | 70.7  | 74.1  | 82.8  | 13    | 64.8  | 76.4  | 63    | 0.19472871  | 77.725  | 54.3    | 23.425  | 1.431399632 | 0.2374   | -1.727 |
| 94150_at   | 28.7  | 14.2  | 25    | 18.7  | 26.6  | 13.1  | 4.8   | 40.9  | 0.973696761 | 21.65   | 21.35   | 0.3     | 1.014051522 | 0.6216   | -1.293 |
| 94151_at   | 7.6   | 11.9  | 8.4   | 17    | 16.4  | 3.6   | 1.8   | 17    | 0.754425605 | 11.225  | 9.7     | 1.525   | 1.157216495 | 0.4404   | -1.623 |
| 94152_at   | 4.6   | 20.6  | 10.1  | 14    | 11.1  | 13.1  | 10.3  | 3.2   | 0.500005576 | 12.325  | 9.425   | 2.9     | 1.307692308 | 0.5928   | -1.293 |
| 94153_g_at | 14    | 7.7   | 11.4  | 10    | 9.5   | 13.1  | 9.6   | 8.5   | 0.730706309 | 10.775  | 10.175  | 0.6     | 1.058968059 | 0.7889   | -1.045 |
| 94154_at   | 45.9  | 7.8   | 25.7  | 12.8  | 11.2  | 11.3  | 30.2  | 10.6  | 0.494098714 | 23.05   | 15.825  | 7.225   | 1.456556082 | 0.5856   | -1.306 |
| 94155_at   | 7.8   | 2.2   | 2.3   | 2.7   | 3     | 9.4   | 2     | 3.3   | 0.765601168 | 3.75    | 4.425   | 0.675   | 0.847457627 | 0.7513   | 1.16   |
| 94156_at   | 30.2  | 48.9  | 60.7  | 26.3  | 142.3 | 98.4  | 82.5  | 102.1 | 0.007444731 | 41.525  | 106.325 | 64.8    | 0.390547849 | 0.005136 | 2.657  |
| 94157_i_at | 0.7   | 1.9   | 12.1  | 0.6   | 2.2   | 0.9   | 1.9   | 6.3   | 0.756824136 | 3.825   | 2.825   | 1       | 1.353982301 | 0.7821   | 1.263  |
| 94158_f_at | 104.8 | 78.5  | 92    | 79.4  | 88.4  | 52.5  | 61.2  | 106.1 | 0.442909623 | 88.675  | 77.05   | 11.625  | 1.150876055 | 0.3657   | -1.188 |
| 94159_at   | 132.8 | 25.3  | 111.2 | 132.9 | 37.8  | 82.3  | 66.2  | 104.1 | 0.384991535 | 100.55  | 72.6    | 27.95   | 1.384986226 | 0.6609   | -1.235 |
| 94160_at   | 261.9 | 295.9 | 362.1 | 325.3 | 219.5 | 368.6 | 239.9 | 332.2 | 0.632727493 | 311.3   | 290.05  | 21.25   | 1.07326323  | 0.5654   | -1.091 |
| 94161_at   | 61.7  | 123   | 156.6 | 104.8 | 72    | 119.5 | 55.3  | 79    | 0.26256347  | 111.525 | 81.45   | 30.075  | 1.369244936 | 0.2825   | -1.35  |
| 94162_at   | 615.7 | 566.5 | 610   | 702.5 | 322.4 | 536.3 | 567.3 | 645.6 | 0.230101393 | 623.675 | 517.9   | 105.775 | 1.20423827  | 0.2252   | -1.24  |
| 94163_at   | 390.2 | 385.4 | 387   | 330.9 | 323.6 | 368.9 | 277.5 | 377   | 0.233152552 | 373.375 | 336.75  | 36.625  | 1.108760208 | 0.2294   | -1.114 |
| 94164_at   | 11    | 38.5  | 17    | 12.9  | 44.1  | 53.2  | 47.1  | 34.1  | 0.020978773 | 19.85   | 44.625  | 24.775  | 0.444817927 | 0.01985  | 2.526  |
| 94165_at   | 52.1  | 5.8   | 11.4  | 29.2  | 12.2  | 24.9  | 29.5  | 51.9  | 0.720823491 | 24.625  | 29.625  | 5       | 0.831223629 | 0.5264   | 1.467  |
| 94166_g_at | 120   | 79.4  | 147.2 | 94.3  | 90.6  | 110.1 | 111   | 117.8 | 0.86759637  | 110.225 | 107.375 | 2.85    | 1.026542491 | 0.9822   | -1.003 |
| 94167_at   | 19.1  | 25.3  | 15.8  | 13    | 17.6  | 19.7  | 20    | 17.1  | 0.919008113 | 18.3    | 18.6    | 0.3     | 0.983870968 | 0.7735   | -1.045 |
| 94168_at   | 13.3  | 12.4  | 15.6  | 25.4  | 18.3  | 17.9  | 15.1  | 18.1  | 0.839062233 | 16.675  | 17.35   | 0.675   | 0.961095101 | 0.6569   | -1.081 |
| 94169_at   | 20    | 13.7  | 18.9  | 19    | 29.8  | 17.3  | 23.9  | 15.7  | 0.344323483 | 17.9    | 21.675  | 3.775   | 0.825836217 | 0.3629   | 1.183  |
| 94170_at   | 137.1 | 35.8  | 244.3 | 157.6 | 151.4 | 160.1 | 93.4  | 43    | 0.559206165 | 143.7   | 111.975 | 31.725  | 1.28332217  | 0.758    | -1.18  |
| 94171_at   | 83.5  | 52.7  | 62.6  | 99.5  | 108.1 | 53.8  | 84.6  | 98.7  | 0.487515201 | 74.575  | 86.3    | 11.725  | 0.864136732 | 0.5212   | 1.154  |
| 94172_at   | 19    | 38.2  | 29.7  | 23.8  | 14.6  | 39.6  | 26.2  | 9.6   | 0.539014866 | 27.675  | 22.5    | 5.175   | 1.23        | 0.3986   | -1.37  |
| 94173_at   | 60.8  | 58.1  | 79.6  | 43.9  | 94.9  | 76.9  | 110.1 | 88.5  | 0.019351252 | 60.6    | 92.6    | 32      | 0.654427646 | 0.02204  | 1.55   |
| 94174_at   | 276.1 | 185.1 | 237.3 | 213.7 | 156.9 | 180.3 | 172.4 | 108.9 | 0.02718455  | 228.05  | 154.625 | 73.425  | 1.474858529 | 0.03174  | -1.486 |
| 94175_at   | 19.6  | 97.6  | 103.3 | 33.1  | 70.4  | 34.3  | 73.1  | 115.9 | 0.726819536 | 63.4    | 73.425  | 10.025  | 0.863466122 | 0.5756   | 1.33   |
| 94176_at   | 52.3  | 61.8  | 93.4  | 114.8 | 80.9  | 109.4 | 115.9 | 133   | 0.159817525 | 80.575  | 109.8   | 29.225  | 0.733834244 | 0.1534   | 1.409  |
| 94177_at   | 101.2 | 78.9  | 103.8 | 105.6 | 86.9  | 101.5 | 28.5  | 122.7 | 0.590179738 | 97.375  | 84.9    | 12.475  | 1.146937574 | 0.4655   | -1.298 |
| 94178_at   | 2.2   | 11.5  | 2.5   | 10.3  | 19.9  | 8.7   | 3.2   | 17    | 0.274456659 | 6.625   | 12.2    | 5.575   | 0.543032787 | 0.3076   | 1.973  |
| 94179_at   | 15.4  | 6.8   | 13.1  | 5.8   | 26.5  | 18.2  | 4     | 37.7  | 0.211060988 | 10.275  | 21.6    | 11.325  | 0.475694444 | 0.3503   | 1.743  |
| 94180_s_at | 14.8  | 27.6  | 21    | 3.8   | 24.2  | 23.6  | 23.3  | 22.7  | 0.280361869 | 16.8    | 23.45   | 6.65    | 0.71641791  | 0.2529   | 1.747  |
| 94181_at   | 5     | 5     | 12.6  | 8.9   | 6.5   | 7.5   | 5.6   | 14.1  | 0.842822162 | 7.875   | 8.425   | 0.55    | 0.934718101 | 0.8023   | -1.084 |
| 94182_at   | 30.2  | 12.8  | 11.3  | 11.1  | 19    | 16.5  | 11.5  | 9.3   | 0.679338888 | 16.35   | 14.075  | 2.275   | 1.161634103 | 0.7556   | -1.099 |
| 94183_at   | 362.4 | 313.8 | 330.7 | 371.1 | 415.7 | 376.4 | 301.2 | 399.7 | 0.36616118  | 344.5   | 373.25  | 28.75   | 0.922973878 | 0.3954   | -1.078 |
| 94184_at   | 42.7  | 43.4  | 68.7  | 33.4  | 34.1  | 56.7  | 62.4  | 62.2  | 0.526868503 | 47.05   | 53.85   | 6.8     | 0.873723305 | 0.5231   | 1.152  |
| 94185_at   | 209.3 | 160.6 | 225.4 | 171.7 | 223.1 | 174.3 | 215.7 | 157.8 | 0.96613237  | 191.75  | 192.725 | 0.975   | 0.994940978 | 0.9716   | -1.004 |
| 94186_at   | 7.3   | 5.4   | 4.2   | 6.6   | 8.2   | 5.2   | 4.7   | 6.4   | 0.817310635 | 5.875   | 6.125   | 0.25    | 0.959183673 | 0.8274   | -1.04  |
| 94187_at   | 33.3  | 57.8  | 14.4  | 45.7  | 12.8  | 67.1  | 34.2  | 13.4  | 0.721126876 | 37.8    | 31.875  | 5.925   | 1.185882353 | 0.5822   | -1.339 |
| 94188_at   | 294.5 | 335.4 | 344   | 283.7 | 417.8 | 374   | 477.1 | 403.2 | 0.009732379 | 314.4   | 418.025 | 103.625 | 0.752108128 | 0.00648  | 1.329  |
| 94189_at   | 63.1  | 126.7 | 95.8  | 142.3 | 44.7  | 86.7  | 82.6  | 87    | 0.180803667 | 106.975 | 75.25   | 31.725  | 1.421594684 | 0.2107   | -1.405 |
| 94190_at   | 27    | 65    | 77.9  | 95.4  | 101.3 | 94.9  | 123.8 | 106.9 | 0.061752703 | 66.325  | 106.725 | 40.4    | 0.621457016 | 0.09192  | 1.767  |
| 94191_at   | 31    | 18.9  | 36.3  | 24.1  | 24.1  | 32.2  | 32.2  | 14.8  | 0.766694071 | 27.575  | 25.825  | 1.75    | 1.067763795 | 0.7386   | -1.085 |
| 94192_at   | 111.1 | 110.8 | 101.8 | 227.1 | 98.2  | 213   | 145.8 | 142.7 | 0.75985196  | 137.7   | 149.925 | 12.225  | 0.91845923  | 0.6793   | -1.112 |
| 94193_at   | 31.1  | 36.9  | 53.2  | 78.5  | 127.3 | 62.6  | 87    | 80    | 0.066469525 | 49.925  | 89.225  | 39.3    | 0.559540488 | 0.05174  | 1.844  |
| 94194_s_at | 5.4   | 4.2   | 4.8   | 6.5   | 6.8   | 18.7  | 9.5   | 8.3   | 0.126582919 | 5.225   | 10.825  | 5.6     | 0.482678984 | 0.03254  | 1.943  |
| 94195_r_at | 534   | 607.6 | 836.7 | 560.9 | 893.6 | 618.3 | 657.6 | 742.2 | 0.351435192 | 634.8   | 727.925 | 93.125  | 0.872067864 | 0.3123   | 1.154  |
| 94196_at   | 303.6 | 238.4 | 257.1 | 330.9 | 250.1 | 256.4 | 215.9 | 273.8 | 0.231278249 | 282.5   | 249.05  | 33.45   | 1.134310379 | 0.2279   | -1.129 |
| 94197_at   | 233   | 207.7 | 255.7 | 274.6 | 146.2 | 363.3 | 199.1 | 261.1 | 0.995043486 | 242.75  | 242.425 | 0.325   | 1.001340621 | 0.8072   | -1.053 |



|            |        |        |        |        |        |        |        |        |             |          |          |         |             |         |        |
|------------|--------|--------|--------|--------|--------|--------|--------|--------|-------------|----------|----------|---------|-------------|---------|--------|
| 94198_at   | 20.6   | 12.8   | 12.1   | 37.9   | 15     | 16.3   | 24.2   | 17.6   | 0.707075301 | 20.85    | 18.275   | 2.575   | 1.140902873 | 0.9006  | -1.038 |
| 94199_at   | 6.5    | 10.6   | 28.5   | 24.2   | 46.5   | 40.4   | 25.1   | 30.3   | 0.044832149 | 17.45    | 35.575   | 18.125  | 0.490513001 | 0.06418 | 2.341  |
| 94200_at   | 10.3   | 5.7    | 18     | 7.7    | 28     | 32.9   | 22.3   | 16.4   | 0.019630881 | 10.425   | 24.9     | 14.475  | 0.418674699 | 0.01767 | 2.539  |
| 94201_at   | 7.1    | 1.1    | 2.5    | 2.1    | 2.2    | 1.9    | 9.9    | 3.4    | 0.637189497 | 3.2      | 4.35     | 1.15    | 0.735632184 | 0.606   | 1.336  |
| 94202_at   | 24.3   | 67.6   | 35.4   | 78.8   | 71.3   | 60.5   | 54.1   | 89.8   | 0.301910616 | 51.525   | 68.925   | 17.4    | 0.747551687 | 0.2473  | 1.464  |
| 94203_at   | 75     | 94.6   | 114.1  | 84.5   | 100.8  | 101.9  | 54     | 98.4   | 0.82738016  | 92.05    | 88.775   | 3.275   | 1.036891017 | 0.763   | -1.058 |
| 94205_at   | 2.9    | 5.7    | 2.6    | 3.1    | 5.3    | 6.3    | 3.5    | 2.6    | 0.471109983 | 3.575    | 4.425    | 0.85    | 0.807909605 | 0.4723  | 1.228  |
| 94206_at   | 4843.6 | 4371.6 | 4752.2 | 3928.7 | 5618.6 | 4283.8 | 5002.6 | 4149.4 | 0.50147082  | 4474.025 | 4763.6   | 289.575 | 0.939210891 | 0.5177  | -1.06  |
| 94207_at   | 489.3  | 361.2  | 392.2  | 365.6  | 360.8  | 387    | 414.1  | 323.6  | 0.426412095 | 402.075  | 371.375  | 30.7    | 1.082665769 | 0.4214  | -1.079 |
| 94208_at   | 3859.3 | 2271.3 | 3480.8 | 2700.8 | 2439   | 3429   | 2756.2 | 1698.5 | 0.366623628 | 3078.05  | 2580.675 | 497.375 | 1.192730584 | 0.3653  | -1.205 |
| 94209_g_at | 2653.5 | 1737.6 | 2080.1 | 1735.1 | 1655.1 | 2157.2 | 1774.7 | 1344.1 | 0.291352233 | 2051.575 | 1732.775 | 318.8   | 1.18398234  | 0.2769  | -1.182 |
| 94210_at   | 2612.5 | 2410.5 | 3177.6 | 2060.2 | 4320.3 | 2276.7 | 3157.4 | 2235.8 | 0.467136729 | 2565.2   | 2997.55  | 432.35  | 0.855765542 | 0.4968  | 1.139  |
| 94211_at   | 626.7  | 608.3  | 582.5  | 531    | 838.2  | 559.8  | 579.4  | 396.9  | 0.948995921 | 587.125  | 593.575  | 6.45    | 0.989133639 | 0.8923  | -1.022 |
| 94212_at   | 62.3   | 24.8   | 31     | 23.4   | 71.4   | 71.4   | 57.1   | 21.9   | 0.227113077 | 35.375   | 55.45    | 20.075  | 0.637962128 | 0.2734  | 1.545  |
| 94214_at   | 1631.4 | 1435.4 | 1872.2 | 1954.2 | 2821.5 | 2212.5 | 2553.6 | 1731.8 | 0.076118094 | 1723.3   | 2329.85  | 606.55  | 0.739661352 | 0.06081 | 1.34   |
| 94215_at   | 19.4   | 19.6   | 11.8   | 41.8   | 70.8   | 24.5   | 42.5   | 13.5   | 0.350273179 | 23.15    | 37.825   | 14.675  | 0.612029081 | 0.3804  | 1.519  |
| 94216_at   | 2195.2 | 2771.4 | 2400.4 | 2439.1 | 2087.3 | 2573   | 2222.3 | 2243.6 | 0.323335313 | 2451.525 | 2281.55  | 169.975 | 1.074499792 | 0.3157  | -1.074 |
| 94217_f_at | 514.9  | 457.3  | 478.2  | 386.8  | 374.5  | 441.1  | 360.3  | 476.3  | 0.274646325 | 459.3    | 413.05   | 46.25   | 1.111971916 | 0.2766  | -1.113 |
| 94218_at   | 435.4  | 460.7  | 550.3  | 530    | 427.2  | 485.4  | 419.8  | 513.3  | 0.394847741 | 494.1    | 461.425  | 32.675  | 1.070813242 | 0.3993  | -1.07  |
| 94219_at   | 3254.3 | 2800.4 | 3097.8 | 2700.4 | 3719.3 | 2557.6 | 3011.8 | 3047.3 | 0.676772538 | 2963.225 | 3084     | 120.775 | 0.960838197 | 0.7137  | -1.034 |
| 94220_at   | 76.3   | 82     | 84.8   | 42.5   | 77.1   | 79     | 86     | 54.2   | 0.831509824 | 71.4     | 74.075   | 2.675   | 0.963887951 | 0.773   | -1.06  |
| 94222_at   | 159.6  | 180    | 254.6  | 340.2  | 270.1  | 196.8  | 215.1  | 264.9  | 0.947672604 | 233.6    | 236.725  | 3.125   | 0.986799028 | 0.8034  | -1.05  |
| 94223_at   | 135    | 112.2  | 126.4  | 146.7  | 121.9  | 158.1  | 161.1  | 160.9  | 0.143351632 | 130.075  | 150.5    | 20.425  | 0.864285714 | 0.1558  | 1.155  |
| 94224_s_at | 137.8  | 112.5  | 127.5  | 130.8  | 133.1  | 143    | 87.1   | 118.1  | 0.634604815 | 127.15   | 120.325  | 6.825   | 1.05672138  | 0.577   | -1.072 |
| 94225_at   | 661.6  | 481.2  | 636.3  | 621.5  | 412.2  | 591.3  | 644.6  | 534.6  | 0.430147319 | 600.15   | 545.675  | 54.475  | 1.099830485 | 0.4343  | -1.107 |
| 94226_at   | 284.6  | 272.7  | 380.6  | 233.1  | 363.4  | 329    | 337.6  | 235.8  | 0.592332699 | 292.75   | 316.45   | 23.7    | 0.925106652 | 0.5857  | -1.084 |
| 94227_at   | 38.6   | 44.8   | 47.3   | 40.4   | 52.8   | 39.9   | 50.2   | 49.5   | 0.179794934 | 42.775   | 48.1     | 5.325   | 0.889293139 | 0.1914  | 1.121  |
| 94228_at   | 1476.3 | 1350.5 | 1304.4 | 1425.1 | 1413.3 | 1227.3 | 1270.6 | 1154.9 | 0.120690249 | 1389.075 | 1266.525 | 122.55  | 1.096760822 | 0.1121  | -1.099 |
| 94229_at   | 580.2  | 748.2  | 719.5  | 686.3  | 631    | 765.8  | 699.1  | 705.9  | 0.72634019  | 683.55   | 700.45   | 16.9    | 0.975872653 | 0.7113  | -1.027 |
| 94231_at   | 107.2  | 89.8   | 150.1  | 160.5  | 122.9  | 151.8  | 148.2  | 186.7  | 0.281091158 | 126.9    | 152.4    | 25.5    | 0.832677165 | 0.2636  | 1.222  |
| 94232_at   | 283.4  | 292.2  | 282.5  | 483.7  | 268.4  | 282.2  | 294    | 456.1  | 0.881763455 | 335.45   | 325.175  | 10.275  | 1.03159837  | 0.8851  | -1.027 |
| 94233_at   | 565.3  | 610.3  | 646.8  | 465.1  | 613.2  | 642.4  | 647.3  | 564    | 0.358491867 | 571.875  | 616.725  | 44.85   | 0.927277149 | 0.3388  | -1.085 |
| 94235_at   | 222.8  | 224.5  | 207.4  | 194.4  | 245    | 251.9  | 208.7  | 293.8  | 0.117380783 | 212.275  | 249.85   | 37.575  | 0.849609766 | 0.09001 | 1.17   |
| 94236_at   | 2632.1 | 4194.5 | 3043.8 | 3415.6 | 3207.9 | 3225.6 | 3820   | 3722.4 | 0.662879124 | 3321.5   | 3493.975 | 172.475 | 0.950636453 | 0.5887  | -1.064 |
| 94237_at   | 2314.9 | 1676.4 | 1902   | 1848.4 | 1708.5 | 2083.4 | 2240   | 2002.4 | 0.691606131 | 1935.425 | 2008.575 | 73.15   | 0.963581146 | 0.6731  | -1.04  |
| 94238_at   | 217.2  | 167.8  | 152.9  | 139.4  | 95.5   | 239.3  | 139.4  | 138.1  | 0.662323588 | 169.325  | 153.075  | 16.25   | 1.106157113 | 0.5279  | -1.153 |
| 94239_at   | 453.7  | 421    | 480.8  | 480.9  | 271.2  | 519.2  | 367.2  | 630.1  | 0.889319746 | 459.1    | 446.925  | 12.175  | 1.027241707 | 0.7017  | -1.079 |
| 94240_i_at | 260.1  | 56.5   | 43.8   | 319.1  | 195.1  | 14.1   | 32.4   | 407.6  | 0.949844068 | 169.875  | 162.3    | 7.575   | 1.046672828 | 0.659   | -1.54  |
| 94241_at   | 255.9  | 218.6  | 232.4  | 282.2  | 234    | 248.3  | 293.3  | 292.5  | 0.376111374 | 247.275  | 267.025  | 19.75   | 0.926036888 | 0.3767  | -1.08  |
| 94242_at   | 1491.7 | 1237.6 | 1340   | 1345.3 | 1415.9 | 1378.1 | 1391.8 | 1088.1 | 0.72063593  | 1353.65  | 1318.475 | 35.175  | 1.026678549 | 0.6985  | -1.03  |
| 94243_at   | 1503.3 | 1033.2 | 1421   | 1289   | 675.1  | 990.8  | 974.2  | 890.1  | 0.016887365 | 1311.625 | 882.55   | 429.075 | 1.486176421 | 0.01685 | -1.488 |
| 94244_at   | 586.6  | 820.4  | 693.1  | 731.5  | 592.6  | 744    | 769.2  | 885.5  | 0.624720043 | 707.9    | 747.825  | 39.925  | 0.946611841 | 0.6493  | -1.053 |
| 94245_at   | 468.7  | 421.5  | 349.8  | 430.1  | 451.2  | 498.6  | 434.8  | 448.4  | 0.21487168  | 417.525  | 458.25   | 40.725  | 0.911129296 | 0.2049  | -1.102 |
| 94246_at   | 414    | 392.6  | 302.2  | 372.8  | 191    | 245.1  | 251    | 472.2  | 0.296106441 | 370.4    | 289.825  | 80.575  | 1.278012594 | 0.1953  | -1.348 |
| 94247_at   | 690.7  | 1026.8 | 734.2  | 927    | 816.5  | 846.6  | 1167.1 | 929    | 0.429729019 | 844.675  | 939.8    | 95.125  | 0.898781656 | 0.4081  | -1.116 |
| 94248_at   | 1703.1 | 1701   | 1504   | 1248.2 | 1451   | 1621.8 | 1474.3 | 1807.5 | 0.727658292 | 1539.075 | 1588.65  | 49.575  | 0.968794259 | 0.7034  | -1.036 |
| 94249_at   | 891.2  | 738    | 733.4  | 827.1  | 714.6  | 758.8  | 680.6  | 821.5  | 0.315207822 | 797.425  | 743.875  | 53.55   | 1.071987901 | 0.3118  | -1.071 |
| 94250_at   | 1532.3 | 1108   | 1280.9 | 1336.6 | 975.5  | 1346.3 | 1315   | 1204.3 | 0.423166007 | 1314.45  | 1210.275 | 104.175 | 1.086075479 | 0.4311  | -1.087 |
| 94252_at   | 3153.8 | 2690.7 | 3016.9 | 2772   | 2344.8 | 3123.6 | 2829.2 | 2625.7 | 0.405838334 | 2908.35  | 2730.825 | 177.525 | 1.065007827 | 0.3845  | -1.069 |
| 94253_at   | 2279.4 | 1670.6 | 2184.7 | 1998.5 | 2040.7 | 1797.4 | 2055.4 | 1612.2 | 0.396390839 | 2033.3   | 1876.425 | 156.875 | 1.083603128 | 0.4171  | -1.081 |
| 94254_at   | 1402.3 | 1510.1 | 1559.8 | 1345.9 | 1510.4 | 1364.2 | 1278.5 | 1167.5 | 0.210720631 | 1454.525 | 1330.15  | 124.375 | 1.093504492 | 0.1991  | -1.097 |
| 94255_g_at | 1401.1 | 1785.2 | 1425.1 | 1781.7 | 1173.8 | 1563.1 | 1403   | 1750.5 | 0.469238242 | 1598.275 | 1472.6   | 125.675 | 1.085342252 | 0.4592  | -1.09  |
| 94256_at   | 1919   | 2876   | 1796.6 | 2153.3 | 1702.7 | 2433.6 | 1765.2 | 1646.4 | 0.364825614 | 2186.225 | 1886.975 | 299.25  | 1.158587157 | 0.3384  | -1.154 |
| 94257_at   | 1962.7 | 1502.7 | 1638   | 1293.6 | 1389.1 | 2013.7 | 1234.4 | 1618.9 | 0.878223728 | 1599.25  | 1564.025 | 35.225  | 1.022522019 | 0.8451  | -1.028 |
| 94258_at   | 505.5  | 470    | 515.9  | 577.8  | 587.3  | 411.5  | 557.1  | 784.4  | 0.450472422 | 517.3    | 585.075  | 67.775  | 0.88416015  | 0.4991  | 1.105  |
| 94259_at   | 1345.1 | 1517.1 | 1249.2 | 1360.3 | 1877.7 | 1277.9 | 1620.2 | 1465.4 | 0.235267451 | 1367.925 | 1560.3   | 192.375 | 0.876706403 | 0.2194  | 1.132  |



|            |        |         |        |        |        |         |        |        |             |          |          |          |             |          |        |
|------------|--------|---------|--------|--------|--------|---------|--------|--------|-------------|----------|----------|----------|-------------|----------|--------|
| 94260_at   | 580.2  | 1142.7  | 824    | 1079.6 | 950.6  | 795.9   | 993.3  | 970.4  | 0.885994082 | 906.625  | 927.55   | 20.925   | 0.977440569 | 0.7559   | -1.054 |
| 94261_at   | 2746.2 | 3358.7  | 3245.1 | 3201.7 | 2805.7 | 3124.5  | 3446.1 | 3384.1 | 0.801547035 | 3137.925 | 3190.1   | 52.175   | 0.983644713 | 0.8113   | -1.016 |
| 94262_at   | 590.3  | 601.8   | 718.7  | 784.3  | 546.2  | 809.3   | 622.4  | 580.7  | 0.666244529 | 673.775  | 639.65   | 34.125   | 1.053349488 | 0.6284   | -1.058 |
| 94263_f_at | 3905.7 | 2985.2  | 3480.7 | 3161   | 3303.5 | 2911.8  | 3078.5 | 2898   | 0.203330201 | 3383.15  | 3047.95  | 335.2    | 1.109975557 | 0.1803   | -1.106 |
| 94264_at   | 979.9  | 1138    | 1136.4 | 897.6  | 1170.6 | 1040.8  | 1106.4 | 978.8  | 0.638302593 | 1037.975 | 1074.15  | 36.175   | 0.966322208 | 0.6152   | -1.038 |
| 94266_at   | 1932.1 | 1658.8  | 1858.5 | 1605   | 2226.2 | 1733.9  | 2005.5 | 2079.6 | 0.107920645 | 1763.6   | 2011.3   | 247.7    | 0.876845821 | 0.1077   | 1.139  |
| 94267_i_at | 2702.1 | 2398.5  | 2957.8 | 2345.7 | 3217.8 | 2537.1  | 2780.3 | 1799.4 | 0.960282612 | 2601.025 | 2583.65  | 17.375   | 1.006724982 | 0.8642   | -1.024 |
| 94268_f_at | 4673.4 | 3950.4  | 4854.6 | 4754.4 | 5422.6 | 4238.9  | 4960.9 | 4397.4 | 0.585865485 | 4558.2   | 4754.95  | 196.75   | 0.958622068 | 0.6007   | -1.042 |
| 94269_at   | 5707   | 5158.1  | 5795   | 4766.1 | 5227.3 | 5398.1  | 5193.2 | 4812.6 | 0.501089722 | 5356.55  | 5157.8   | 198.75   | 1.038533871 | 0.5185   | -1.036 |
| 94270_at   | 435.9  | 332.5   | 301.6  | 232.4  | 497.2  | 584.4   | 491.3  | 613.1  | 0.006782545 | 325.6    | 546.5    | 220.9    | 0.5957914   | 0.008938 | 1.713  |
| 94271_at   | 1.8    | 7.2     | 1.4    | 11.8   | 1.6    | 1.4     | 1.5    | 1.9    | 0.207732531 | 5.55     | 1.6      | 3.95     | 3.46875     | 0.1416   | -2.411 |
| 94272_g_at | 212.4  | 185.5   | 269.9  | 228.7  | 267.4  | 206.7   | 227    | 254.5  | 0.534140429 | 224.125  | 238.9    | 14.775   | 0.938154039 | 0.5108   | -1.07  |
| 94273_at   | 1568.4 | 1393.6  | 1518.3 | 1469.7 | 1196.3 | 1464.1  | 1335.6 | 1426.5 | 0.118875626 | 1487.5   | 1355.625 | 131.875  | 1.097279852 | 0.1156   | -1.1   |
| 94274_at   | 855.5  | 1456.3  | 1576.8 | 1443.6 | 1517.9 | 1306.6  | 885.1  | 1122   | 0.574776269 | 1333.05  | 1207.9   | 125.15   | 1.10360957  | 0.6334   | -1.095 |
| 94275_at   | 947.1  | 849.8   | 877.2  | 668.5  | 1171.7 | 820.9   | 893    | 746    | 0.540690201 | 835.65   | 907.9    | 72.25    | 0.920420751 | 0.5566   | -1.079 |
| 94276_at   | 1741.4 | 1599.1  | 1722.7 | 1890.7 | 1239   | 1504.1  | 1178.3 | 1710.7 | 0.068354267 | 1738.475 | 1408.025 | 330.45   | 1.234690435 | 0.05571  | -1.247 |
| 94277_at   | 852.2  | 815.1   | 807.5  | 634    | 739.8  | 792.6   | 777.9  | 731.5  | 0.760606449 | 777.2    | 760.45   | 16.75    | 1.022026432 | 0.826    | -1.016 |
| 94278_at   | 305.7  | 339.8   | 322    | 326.1  | 309.5  | 287     | 318.7  | 429    | 0.72059314  | 323.4    | 336.05   | 12.65    | 0.962356792 | 0.7777   | -1.027 |
| 94279_at   | 101.5  | 96.1    | 129.4  | 110.3  | 108.4  | 92.9    | 104.3  | 146.6  | 0.797252844 | 109.325  | 113.05   | 3.725    | 0.967049978 | 0.8375   | -1.025 |
| 94281_at   | 1385   | 1280    | 1283.4 | 1178.7 | 1286.5 | 1306.5  | 1156.9 | 1112.8 | 0.339529766 | 1281.775 | 1215.675 | 66.1     | 1.054373085 | 0.3363   | -1.055 |
| 94282_at   | 1588.2 | 1302.9  | 1466.3 | 1362.6 | 1025.7 | 1345    | 1182.8 | 1280   | 0.055899856 | 1430     | 1208.375 | 221.625  | 1.183407469 | 0.05896  | -1.186 |
| 94283_at   | 18.1   | 11.3    | 8.8    | 16.5   | 14.2   | 15.5    | 8.1    | 10     | 0.559881224 | 13.675   | 11.95    | 1.725    | 1.144351464 | 0.5948   | -1.135 |
| 94284_at   | 1330.9 | 1084.1  | 1235.7 | 1186.6 | 911.1  | 1311.7  | 1277.5 | 1270.1 | 0.88275483  | 1209.325 | 1192.6   | 16.725   | 1.014023981 | 0.8287   | -1.022 |
| 94285_at   | 177    | 182.7   | 189.7  | 140.5  | 316.5  | 545.9   | 350.9  | 505    | 0.017817333 | 172.475  | 429.575  | 257.1    | 0.401501484 | 0.001009 | 2.441  |
| 94286_at   | 1182.5 | 1091.5  | 1418.5 | 1222.8 | 1149.7 | 1172.5  | 1122.4 | 1323.2 | 0.672236799 | 1228.825 | 1191.95  | 36.875   | 1.0309367   | 0.6858   | -1.028 |
| 94288_at   | 552.3  | 526.2   | 621.4  | 433.6  | 620.7  | 553     | 721.3  | 421.7  | 0.562523259 | 533.375  | 579.175  | 45.8     | 0.920922001 | 0.6158   | -1.075 |
| 94289_r_at | 6603.7 | 5495.2  | 5830.9 | 5350.9 | 7167.5 | 6321.8  | 6736.5 | 6023.7 | 0.095532693 | 5820.175 | 6562.375 | 742.2    | 0.886900703 | 0.09056  | -1.129 |
| 94290_at   | 430.4  | 729.5   | 600.7  | 632.3  | 704.7  | 475.9   | 645    | 491    | 0.828383929 | 598.225  | 579.15   | 19.075   | 1.0329362   | 0.8515   | -1.029 |
| 94291_at   | 92.7   | 55.6    | 75.5   | 64.9   | 23.3   | 61.7    | 47.9   | 93.9   | 0.400961152 | 72.175   | 56.7     | 15.475   | 1.27292769  | 0.3179   | -1.405 |
| 94292_at   | 2074.3 | 2059.4  | 1681.4 | 1647.5 | 1642.8 | 1412.6  | 1627.7 | 1346.9 | 0.04793112  | 1865.65  | 1507.5   | 358.15   | 1.237578773 | 0.039    | -1.235 |
| 94294_at   | 3518.5 | 3319.8  | 3245.9 | 3133   | 3229   | 2818.9  | 2805.3 | 3135.3 | 0.067446882 | 3304.3   | 2997.125 | 307.175  | 1.102489886 | 0.06423  | -1.104 |
| 94295_at   | 1876.9 | 2853.2  | 2220.2 | 2172.5 | 2309   | 2213.7  | 2865.2 | 2697.5 | 0.388508083 | 2280.7   | 2521.35  | 240.65   | 0.904555099 | 0.3573   | 1.112  |
| 94296_s_at | 832.5  | 1169.8  | 845.4  | 1101.2 | 812.9  | 870.4   | 775.5  | 1116.6 | 0.451504006 | 987.225  | 893.85   | 93.375   | 1.104463836 | 0.4449   | -1.103 |
| 94297_at   | 1057.8 | 1567.8  | 1509.2 | 1613.6 | 1582.4 | 1671.4  | 2029.4 | 1847.2 | 0.07983048  | 1437.1   | 1782.6   | 345.5    | 0.806181981 | 0.09391  | 1.252  |
| 94298_at   | 644    | 617.7   | 616.4  | 584.8  | 581.4  | 591.7   | 556.3  | 441.9  | 0.121712871 | 615.725  | 542.825  | 72.9     | 1.134297426 | 0.1101   | -1.141 |
| 94299_at   | 341.3  | 754.3   | 397.4  | 391.5  | 396.8  | 581.9   | 401    | 399.6  | 0.814780457 | 471.125  | 444.825  | 26.3     | 1.059124375 | 0.9241   | -1.02  |
| 94300_f_at | 346.3  | 410.7   | 433.3  | 492.4  | 466.2  | 520.4   | 560.5  | 464.6  | 0.076950672 | 420.675  | 502.925  | 82.25    | 0.836456728 | 0.0769   | 1.201  |
| 94301_at   | 2322.4 | 1762.8  | 1990.1 | 1949.1 | 1871.1 | 1829.1  | 1831.6 | 1752.6 | 0.210606742 | 2006.1   | 1821.1   | 185      | 1.101586953 | 0.1669   | -1.096 |
| 94302_at   | 3967.7 | 3519.8  | 3682.8 | 3258.1 | 3065.9 | 3111.7  | 3371.4 | 3106.2 | 0.050605438 | 3607.1   | 3163.8   | 443.3    | 1.140116316 | 0.03222  | -1.138 |
| 94303_at   | 1183.7 | 1737.4  | 1291.4 | 1817.5 | 1127.6 | 1406.1  | 1302.5 | 1451.6 | 0.343368849 | 1507.5   | 1321.95  | 185.55   | 1.140360831 | 0.3613   | -1.127 |
| 94304_at   | 3834.9 | 3334.6  | 4142.4 | 3069.6 | 3465   | 3779.3  | 3397.1 | 2855.2 | 0.501808638 | 3595.375 | 3374.15  | 221.225  | 1.065564661 | 0.5157   | -1.064 |
| 94305_at   | 5157.1 | 11033.7 | 6916   | 8838.3 | 6948.3 | 10658.4 | 9677   | 8817.5 | 0.516301048 | 7986.275 | 9025.3   | 1039.025 | 0.884876403 | 0.4562   | 1.161  |
| 94307_at   | 192.5  | 270.2   | 193.5  | 244.6  | 296.5  | 281.2   | 283.8  | 321.6  | 0.026927048 | 225.2    | 295.775  | 70.575   | 0.76138957  | 0.02073  | 1.326  |
| 94308_at   | 729.6  | 1009    | 757.5  | 692.9  | 872.6  | 844     | 756.6  | 1206.3 | 0.357066977 | 797.25   | 919.875  | 122.625  | 0.866693844 | 0.3316   | 1.148  |
| 94309_g_at | 1546.9 | 2131.6  | 1814.1 | 1373.4 | 1802.3 | 1933    | 2025.2 | 2383.9 | 0.177435415 | 1716.5   | 2036.1   | 319.6    | 0.84303325  | 0.1628   | 1.196  |
| 94312_at   | 461.8  | 587.7   | 594.7  | 658.6  | 784.9  | 801     | 796.5  | 646.3  | 0.017223097 | 575.7    | 757.175  | 181.475  | 0.760326213 | 0.02253  | 1.321  |
| 94313_at   | 1521.7 | 1870.3  | 1712.1 | 1137.9 | 2666.6 | 1468.8  | 1599.2 | 1434.8 | 0.520237788 | 1560.5   | 1792.35  | 231.85   | 0.870644684 | 0.5309   | 1.128  |
| 94316_at   | 188.1  | 207.3   | 258.4  | 213.5  | 320.4  | 182     | 242.2  | 258.4  | 0.343680504 | 216.825  | 250.75   | 33.925   | 0.864705882 | 0.3631   | 1.141  |
| 94317_at   | 14.7   | 16.7    | 11.2   | 22.3   | 19.4   | 15.5    | 16.5   | 25.2   | 0.393957486 | 16.225   | 19.15    | 2.925    | 0.847258486 | 0.3611   | 1.195  |
| 94318_at   | 3.4    | 5.1     | 6.8    | 11.6   | 6.9    | 2.1     | 6.5    | 6.8    | 0.609105628 | 6.725    | 5.575    | 1.15     | 1.206278027 | 0.6371   | -1.21  |
| 94319_at   | 3590.8 | 3359    | 3430.7 | 3456.5 | 3615.4 | 4048.4  | 3920   | 3244.9 | 0.262527961 | 3459.25  | 3707.175 | 247.925  | 0.933122931 | 0.2458   | -1.068 |
| 94321_at   | 283.6  | 305.1   | 290    | 199.1  | 349.2  | 333.8   | 354    | 265.2  | 0.126479236 | 269.45   | 325.55   | 56.1     | 0.82767624  | 0.1491   | 1.217  |
| 94322_at   | 1535.5 | 1285.6  | 1357   | 1449.4 | 1192.8 | 1416    | 1441.4 | 1760.3 | 0.739463005 | 1406.875 | 1452.625 | 45.75    | 0.968505292 | 0.79     | -1.025 |
| 94323_at   | 4746.2 | 4664.5  | 5227.7 | 4222.6 | 4990.9 | 4368.3  | 4505.3 | 4372.9 | 0.562946356 | 4715.25  | 4559.35  | 155.9    | 1.034193471 | 0.5708   | -1.033 |
| 94324_f_at | 537.9  | 811.7   | 399.7  | 310.4  | 699.4  | 473.1   | 553.7  | 412.7  | 0.881399379 | 514.925  | 534.725  | 19.8     | 0.962971621 | 0.7357   | -1.087 |
| 94325_at   | 2897.6 | 2050.3  | 1724.4 | 2297   | 1732.9 | 2805.3  | 2299   | 2056.8 | 0.957082018 | 2242.325 | 2223.5   | 18.825   | 1.008466382 | 0.9697   | -1.006 |



|            |        |        |        |        |        |        |        |        |             |          |          |         |             |          |        |
|------------|--------|--------|--------|--------|--------|--------|--------|--------|-------------|----------|----------|---------|-------------|----------|--------|
| 94326_r_at | 339    | 324.5  | 405.6  | 440.2  | 506.4  | 310.4  | 445.8  | 314.7  | 0.774301183 | 377.325  | 394.325  | 17      | 0.956888354 | 0.8465   | -1.029 |
| 94327_at   | 1065.5 | 1118.3 | 798.1  | 822.4  | 1462.1 | 1006.6 | 1001.3 | 1296   | 0.141759864 | 951.075  | 1191.5   | 240.425 | 0.798216534 | 0.1325   | 1.25   |
| 94330_at   | 614    | 447.3  | 540.3  | 641.8  | 470    | 429.6  | 471.3  | 502.9  | 0.120593694 | 560.85   | 468.45   | 92.4    | 1.197246238 | 0.09593  | -1.188 |
| 94331_at   | 395.8  | 447.5  | 472.8  | 455.3  | 430.4  | 442.6  | 415.9  | 469.3  | 0.875368861 | 442.85   | 439.55   | 3.3     | 1.007507678 | 0.8963   | -1.006 |
| 94332_at   | 126.3  | 111.6  | 136.2  | 123    | 91.1   | 160.9  | 127.1  | 121.3  | 0.95943056  | 124.275  | 125.1    | 0.825   | 0.993405276 | 0.9321   | -1.011 |
| 94334_f_at | 87.5   | 53.2   | 53.5   | 73.4   | 40.6   | 75.3   | 90.1   | 118    | 0.475938585 | 66.9     | 81       | 14.1    | 0.825925926 | 0.5955   | 1.155  |
| 94335_r_at | 83.8   | 99.4   | 99.7   | 71.6   | 74.8   | 90.5   | 73.7   | 97.5   | 0.634378075 | 88.625   | 84.125   | 4.5     | 1.053491828 | 0.649    | -1.052 |
| 94336_at   | 319.4  | 299.3  | 338.3  | 359.2  | 320.7  | 271.2  | 322.4  | 505.7  | 0.65562951  | 329.05   | 355      | 25.95   | 0.926901408 | 0.7326   | -1.051 |
| 94337_at   | 17.3   | 18.6   | 28.7   | 16.9   | 38     | 16.9   | 19.9   | 28.4   | 0.37080258  | 20.375   | 25.8     | 5.425   | 0.789728682 | 0.3757   | 1.234  |
| 94338_g_at | 371.4  | 372.9  | 330.8  | 378    | 412.2  | 433.4  | 297.7  | 500.7  | 0.345159418 | 363.275  | 411      | 47.725  | 0.883880779 | 0.3823   | 1.114  |
| 94339_at   | 271.8  | 311.9  | 301    | 275.3  | 260.2  | 253.8  | 286.8  | 224.2  | 0.084931618 | 290      | 256.25   | 33.75   | 1.131707317 | 0.08385  | -1.134 |
| 94340_at   | 423.6  | 589.2  | 531.8  | 461.5  | 330.5  | 573.3  | 571.8  | 463.6  | 0.816020682 | 501.525  | 484.8    | 16.725  | 1.034498762 | 0.7504   | -1.051 |
| 94341_at   | 644    | 1019.8 | 719.4  | 854    | 825.2  | 889.8  | 885.2  | 1275.7 | 0.274693299 | 809.3    | 968.975  | 159.675 | 0.835212467 | 0.2478   | 1.197  |
| 94343_at   | 692.3  | 547.2  | 574.5  | 600.8  | 508.7  | 580.9  | 541.3  | 495.3  | 0.108060533 | 603.7    | 531.55   | 72.15   | 1.135735114 | 0.08927  | -1.133 |
| 94344_at   | 106.4  | 129.5  | 104.8  | 109.5  | 170.1  | 107.1  | 135.9  | 105.8  | 0.350948153 | 112.55   | 129.725  | 17.175  | 0.867604548 | 0.3428   | 1.135  |
| 94345_at   | 2025.5 | 1877.1 | 1809.9 | 2254.6 | 1641.7 | 2124.7 | 2042.1 | 1768.7 | 0.541014469 | 1991.775 | 1894.3   | 97.475  | 1.051457003 | 0.5269   | -1.053 |
| 94346_at   | 641.8  | 731.3  | 670.4  | 732.3  | 515.5  | 693.9  | 563.4  | 583.7  | 0.063908585 | 693.95   | 589.125  | 104.825 | 1.177933376 | 0.05428  | -1.183 |
| 94347_i_at | 199.7  | 183.8  | 304.3  | 273.9  | 183    | 294.4  | 287.6  | 227.3  | 0.851768077 | 240.425  | 248.075  | 7.65    | 0.969162552 | 0.8376   | -1.036 |
| 94348_f_at | 972.7  | 791.6  | 939.1  | 797.5  | 1152.8 | 919.4  | 1135.4 | 917.3  | 0.105475061 | 875.225  | 1031.225 | 156     | 0.848723605 | 0.09902  | 1.176  |
| 94349_at   | 94.3   | 88     | 90.4   | 90.8   | 140.5  | 103.4  | 109.9  | 119.9  | 0.040672229 | 90.875   | 118.425  | 27.55   | 0.76736331  | 0.008953 | 1.295  |
| 94350_f_at | 117.6  | 75.5   | 90.5   | 119.4  | 101.9  | 131.6  | 126.8  | 71.9   | 0.689936945 | 100.75   | 108.05   | 7.3     | 0.932438686 | 0.7428   | -1.063 |
| 94351_r_at | 172.2  | 101.7  | 130.7  | 84.2   | 136.4  | 163.6  | 177.3  | 104.6  | 0.389782391 | 122.2    | 145.475  | 23.275  | 0.840006874 | 0.3644   | 1.21   |
| 94352_at   | 509.7  | 684    | 537.1  | 842.8  | 917.6  | 629.9  | 753.7  | 862.8  | 0.190638294 | 643.4    | 791      | 147.6   | 0.813400759 | 0.1799   | 1.242  |
| 94353_at   | 164.5  | 221.6  | 206.5  | 192.4  | 88.2   | 246.1  | 235    | 192.7  | 0.887614357 | 196.25   | 190.5    | 5.75    | 1.030183727 | 0.7084   | -1.102 |
| 94354_at   | 1405.5 | 1268.5 | 1217.6 | 1524.8 | 1364.4 | 1635.4 | 1602.9 | 1721.8 | 0.070636585 | 1354.1   | 1581.125 | 227.025 | 0.856415527 | 0.07286  | 1.168  |
| 94355_at   | 47.5   | 41.8   | 36.4   | 44.6   | 36.5   | 47.6   | 38.3   | 41.9   | 0.674833596 | 42.575   | 41.075   | 1.5     | 1.036518564 | 0.6743   | -1.037 |
| 94356_at   | 460.2  | 438.3  | 414.9  | 470.1  | 330.6  | 537.9  | 504.9  | 402.3  | 0.970542794 | 445.875  | 443.925  | 1.95    | 1.004392634 | 0.8586   | -1.022 |
| 94357_at   | 10.8   | 26.9   | 25.9   | 5.9    | 6.4    | 38.8   | 30.2   | 20.7   | 0.477405978 | 17.375   | 24.025   | 6.65    | 0.723204995 | 0.5837   | 1.369  |
| 94358_at   | 191    | 146.2  | 183.6  | 118.3  | 338.1  | 169    | 222.8  | 112.2  | 0.380111171 | 159.775  | 210.525  | 50.75   | 0.758935993 | 0.4369   | 1.239  |
| 94359_at   | 921.7  | 761.7  | 792    | 967.8  | 713.2  | 783.2  | 733.7  | 966.8  | 0.450745546 | 860.8    | 799.225  | 61.575  | 1.077043386 | 0.4271   | -1.08  |
| 94360_at   | 1314.4 | 983.4  | 980    | 1293.6 | 758.7  | 1017.5 | 995.2  | 941.7  | 0.108156597 | 1142.85  | 928.275  | 214.575 | 1.231154561 | 0.102    | -1.227 |
| 94361_at   | 800.4  | 715.3  | 674.3  | 804.5  | 454.9  | 703.5  | 548.4  | 726.4  | 0.117389393 | 748.625  | 608.3    | 140.325 | 1.230683873 | 0.11     | -1.249 |
| 94362_at   | 2152.2 | 2004.1 | 2413   | 2189.9 | 2295.5 | 2172.2 | 2239.1 | 1906.1 | 0.772070308 | 2189.8   | 2153.225 | 36.575  | 1.016986149 | 0.7707   | -1.017 |
| 94363_at   | 434.2  | 381.1  | 381.9  | 440.2  | 216.5  | 464.7  | 469.9  | 475    | 0.967966793 | 409.35   | 406.525  | 2.825   | 1.006949142 | 0.7956   | -1.055 |
| 94364_at   | 582.5  | 1288.6 | 785.2  | 979.2  | 843.1  | 1039.6 | 800.9  | 983    | 0.963791719 | 908.875  | 916.65   | 7.775   | 0.991518028 | 0.8117   | -1.046 |
| 94365_at   | 1108.6 | 955    | 1034.9 | 916.1  | 1264   | 943.6  | 1044.3 | 920.7  | 0.678089942 | 1003.65  | 1043.15  | 39.5    | 0.962133921 | 0.7042   | -1.034 |
| 94366_at   | 308    | 396.4  | 251.2  | 357.8  | 396.7  | 362.1  | 330.4  | 485.5  | 0.204905446 | 328.35   | 393.675  | 65.325  | 0.834063631 | 0.2      | 1.204  |
| 94367_at   | 752.1  | 838.3  | 904.8  | 805    | 811.1  | 875.3  | 718.8  | 841.4  | 0.782406586 | 825.05   | 811.65   | 13.4    | 1.016509579 | 0.7798   | -1.017 |
| 94368_at   | 239.9  | 290.7  | 262    | 217.3  | 347.9  | 259.5  | 304.8  | 243.7  | 0.250796482 | 252.475  | 288.975  | 36.5    | 0.873691496 | 0.2448   | 1.14   |
| 94369_at   | 962.4  | 769.1  | 1134.9 | 913.1  | 796.7  | 833.7  | 878.4  | 879.1  | 0.28860594  | 944.875  | 846.975  | 97.9    | 1.115587827 | 0.2735   | -1.106 |
| 94370_at   | 8.3    | 6.5    | 34.9   | 5.9    | 9.9    | 5.5    | 3.3    | 8.3    | 0.386787014 | 13.9     | 6.75     | 7.15    | 2.059259259 | 0.3333   | -1.658 |
| 94371_at   | 250.3  | 321.7  | 292.6  | 238.2  | 280.5  | 310.9  | 209.9  | 254.3  | 0.696278848 | 275.7    | 263.9    | 11.8    | 1.044713907 | 0.6818   | -1.048 |
| 94372_at   | 652    | 605.9  | 727.4  | 597.2  | 518.6  | 545.4  | 710.3  | 478.4  | 0.223051341 | 645.625  | 563.175  | 82.45   | 1.146402095 | 0.1844   | -1.156 |
| 94373_at   | 691.6  | 567    | 703    | 668    | 700.4  | 576.3  | 623.6  | 766.3  | 0.865502943 | 657.4    | 666.65   | 9.25    | 0.986124653 | 0.8895   | -1.012 |
| 94374_at   | 436.8  | 569    | 529.1  | 615.8  | 398.5  | 612.5  | 585.8  | 542    | 0.962740316 | 537.675  | 534.7    | 2.975   | 1.005563868 | 0.9305   | -1.011 |
| 94375_at   | 1250.1 | 1355.8 | 1308.8 | 1679.9 | 1077.2 | 1153   | 1350   | 1242.7 | 0.148154828 | 1398.65  | 1205.725 | 192.925 | 1.160007464 | 0.1249   | -1.156 |
| 94376_s_at | 412.2  | 281.4  | 317    | 331.2  | 228    | 351.2  | 281.4  | 274.3  | 0.217897952 | 335.45   | 283.725  | 51.725  | 1.182306811 | 0.2047   | -1.185 |
| 94377_at   | 358.2  | 354.4  | 328.3  | 260.6  | 494.8  | 374.5  | 361.9  | 337.5  | 0.168720474 | 325.375  | 392.175  | 66.8    | 0.829667878 | 0.1521   | 1.202  |
| 94378_at   | 149.5  | 171.8  | 202    | 220.8  | 242.3  | 290.1  | 223.7  | 262.5  | 0.018278634 | 186.025  | 254.65   | 68.625  | 0.730512468 | 0.02067  | 1.378  |
| 94379_at   | 204.3  | 154.1  | 167.9  | 234.9  | 111.8  | 113.7  | 106.3  | 143.1  | 0.021648374 | 190.3    | 118.725  | 71.575  | 1.602863761 | 0.007018 | -1.592 |
| 94380_at   | 532.7  | 455.9  | 544.2  | 496    | 340    | 543.6  | 569.4  | 514.8  | 0.797774932 | 507.2    | 491.95   | 15.25   | 1.030999085 | 0.7159   | -1.049 |
| 94381_at   | 453.8  | 612.8  | 624.4  | 517.2  | 905.8  | 516.2  | 609.5  | 616.4  | 0.301293903 | 552.05   | 661.975  | 109.925 | 0.83394388  | 0.2791   | 1.183  |
| 94382_at   | 349.3  | 321.9  | 318    | 327.8  | 325    | 418.8  | 400.8  | 379.2  | 0.079197339 | 329.25   | 380.95   | 51.7    | 0.864286652 | 0.05342  | 1.152  |
| 94383_at   | 55.8   | 68.7   | 72.2   | 63.5   | 74.3   | 75.8   | 80     | 89.3   | 0.023602134 | 65.05    | 79.85    | 14.8    | 0.814652473 | 0.02495  | 1.23   |
| 94384_at   | 278.5  | 333.8  | 364.8  | 232.1  | 338.1  | 404    | 363.4  | 374.6  | 0.101274899 | 302.3    | 370.025  | 67.725  | 0.816971826 | 0.09103  | 1.24   |
| 94385_at   | 93.2   | 93.1   | 155.3  | 143.3  | 127.8  | 77.3   | 115.9  | 110.9  | 0.528805393 | 121.225  | 107.975  | 13.25   | 1.122713591 | 0.5734   | -1.11  |



|            |        |        |        |        |        |        |        |        |             |          |          |         |             |          |        |
|------------|--------|--------|--------|--------|--------|--------|--------|--------|-------------|----------|----------|---------|-------------|----------|--------|
| 94386_at   | 1461   | 1509.9 | 1401.7 | 1502.1 | 1360   | 1688.8 | 1666.9 | 1630.2 | 0.223688514 | 1468.675 | 1586.475 | 117.8   | 0.925747333 | 0.2165   | -1.077 |
| 94387_at   | 472.3  | 432.7  | 406.1  | 455.1  | 308.8  | 506.1  | 456.7  | 659.1  | 0.612789422 | 441.55   | 482.675  | 41.125  | 0.914797742 | 0.7443   | -1.056 |
| 94388_at   | 275.6  | 244.9  | 285.1  | 254.9  | 199.6  | 309    | 211    | 257.3  | 0.477894295 | 265.125  | 244.225  | 20.9    | 1.085576825 | 0.4006   | -1.1   |
| 94389_at   | 38.6   | 19.1   | 45.3   | 36.4   | 69.2   | 42.5   | 46     | 32.6   | 0.235570939 | 34.85    | 47.575   | 12.725  | 0.732527588 | 0.2382   | 1.379  |
| 94390_at   | 349.7  | 399.6  | 434.6  | 502.9  | 336.7  | 594.1  | 507.1  | 445.7  | 0.470674134 | 421.7    | 470.9    | 49.2    | 0.895519219 | 0.5167   | 1.103  |
| 94391_at   | 22.3   | 5.4    | 20.9   | 1.4    | 6.3    | 18.1   | 1.8    | 10.1   | 0.61196224  | 12.5     | 9.075    | 3.425   | 1.377410468 | 0.8837   | -1.134 |
| 94392_f_at | 94     | 95.1   | 100.1  | 104.9  | 130.8  | 98.7   | 114.6  | 126.5  | 0.070534571 | 98.525   | 117.65   | 19.125  | 0.837441564 | 0.044    | 1.189  |
| 94393_r_at | 987.4  | 888.6  | 1031.8 | 1261.8 | 205.8  | 402.6  | 297.8  | 107.4  | 0.00029495  | 1042.4   | 253.4    | 789     | 4.113654301 | 0.002097 | -4.557 |
| 94394_at   | 347    | 374.6  | 367.8  | 337    | 379.7  | 340.5  | 258.5  | 338.4  | 0.371472141 | 356.6    | 329.275  | 27.325  | 1.082985347 | 0.3405   | -1.093 |
| 94395_at   | 355.5  | 381.1  | 362.1  | 343.4  | 319.4  | 455.1  | 330.7  | 405.2  | 0.63740624  | 360.525  | 377.6    | 17.075  | 0.954780191 | 0.6912   | -1.037 |
| 94396_at   | 791.5  | 883.8  | 863    | 827.5  | 777.5  | 674    | 746.2  | 922.6  | 0.336496912 | 841.45   | 780.075  | 61.375  | 1.078678332 | 0.2877   | -1.085 |
| 94397_at   | 396.1  | 598.1  | 541.3  | 522.6  | 575.7  | 561.4  | 527.2  | 646    | 0.25955827  | 514.525  | 577.575  | 63.05   | 0.890836688 | 0.2521   | 1.132  |
| 94398_s_at | 612    | 608    | 582.2  | 677    | 510    | 536.4  | 522.4  | 674.3  | 0.235670929 | 619.8    | 560.775  | 59.025  | 1.105256119 | 0.1945   | -1.111 |
| 94399_at   | 577.9  | 564.1  | 584.8  | 558.2  | 438.8  | 585.2  | 634.8  | 556.5  | 0.705429174 | 571.25   | 553.825  | 17.425  | 1.031463007 | 0.6359   | -1.041 |
| 94400_at   | 716.1  | 767.2  | 790    | 597.1  | 755.6  | 593.1  | 521.1  | 695.2  | 0.303848789 | 717.6    | 641.25   | 76.35   | 1.119064327 | 0.3033   | -1.124 |
| 94401_s_at | 25.5   | 10.7   | 21.4   | 15.9   | 25.4   | 11.7   | 17.7   | 16.6   | 0.906767061 | 18.375   | 17.85    | 0.525   | 1.029411765 | 0.9473   | -1.017 |
| 94402_r_at | 1      | 1      | 2.9    | 4.4    | 1.1    | 3      | 3.6    | 2.6    | 0.808790233 | 2.325    | 2.575    | 0.25    | 0.902912621 | 0.6711   | 1.225  |
| 94403_at   | 644.6  | 599    | 572.7  | 653.2  | 568.2  | 660.8  | 586.8  | 849.3  | 0.510832499 | 617.375  | 666.275  | 48.9    | 0.926606882 | 0.5267   | -1.067 |
| 94404_at   | 191.2  | 133.9  | 180.6  | 121.5  | 220.9  | 152.9  | 281.9  | 159.9  | 0.23529311  | 156.8    | 203.9    | 47.1    | 0.769004414 | 0.2199   | 1.283  |
| 94405_at   | 46.1   | 131.9  | 173.7  | 112.6  | 177.8  | 107.2  | 72.4   | 150.9  | 0.76643822  | 116.075  | 127.075  | 11      | 0.913436947 | 0.7022   | 1.15   |
| 94406_at   | 799    | 714.7  | 691.6  | 606.6  | 795.1  | 669.4  | 715.6  | 553.4  | 0.77086225  | 702.975  | 683.375  | 19.6    | 1.028681178 | 0.7474   | -1.033 |
| 94407_at   | 237.7  | 296    | 307.6  | 288.6  | 271.7  | 327.9  | 304.1  | 264.5  | 0.669307686 | 282.475  | 292.05   | 9.575   | 0.967214518 | 0.6683   | -1.035 |
| 94408_at   | 953.5  | 936.6  | 1019.8 | 1017.7 | 753.1  | 1057.8 | 955.2  | 1261.3 | 0.831099659 | 981.9    | 1006.85  | 24.95   | 0.975219745 | 0.9396   | -1.009 |
| 94409_at   | 267.3  | 296.2  | 214.5  | 248.8  | 313.4  | 267.3  | 292.4  | 309.5  | 0.110348035 | 256.7    | 295.65   | 38.95   | 0.868256384 | 0.1062   | 1.157  |
| 94410_f_at | 1483.9 | 1424.3 | 1614.4 | 1457.5 | 1649.4 | 1425.7 | 1466.5 | 1614.7 | 0.54727799  | 1495.025 | 1539.075 | 44.05   | 0.971378913 | 0.5528   | -1.029 |
| 94411_at   | 100    | 52.1   | 124.7  | 150.8  | 38.9   | 125.8  | 81.9   | 89.8   | 0.440508697 | 106.9    | 84.1     | 22.8    | 1.271105826 | 0.4877   | -1.285 |
| 94412_at   | 1051.9 | 943    | 904.2  | 967    | 675.5  | 844.8  | 720.5  | 752.6  | 0.003913557 | 966.525  | 748.35   | 218.175 | 1.291541391 | 0.003974 | -1.294 |
| 94413_at   | 838.7  | 969.5  | 710.2  | 952.4  | 828.5  | 935.6  | 906.5  | 1155.1 | 0.373747372 | 867.7    | 956.425  | 88.725  | 0.907232663 | 0.3709   | 1.102  |
| 94414_at   | 49.8   | 35.1   | 27.3   | 39.4   | 15.6   | 15.5   | 35.5   | 49.9   | 0.404794982 | 37.9     | 29.125   | 8.775   | 1.301287554 | 0.2932   | -1.446 |
| 94415_at   | 447.4  | 900.2  | 436    | 699.2  | 716.3  | 751.4  | 705.4  | 589.8  | 0.583991148 | 620.7    | 690.725  | 70.025  | 0.898621014 | 0.4471   | 1.162  |
| 94416_at   | 627.3  | 501.2  | 519.8  | 781.2  | 641.7  | 502.4  | 549.4  | 633.1  | 0.738741488 | 607.375  | 581.65   | 25.725  | 1.044227628 | 0.792    | -1.033 |
| 94417_at   | 215.6  | 202.8  | 216.5  | 180.4  | 264.4  | 282.2  | 254.2  | 221.7  | 0.018069033 | 203.825  | 255.625  | 51.8    | 0.797359413 | 0.01458  | 1.253  |
| 94418_at   | 187.3  | 270.2  | 251.1  | 188.2  | 276.3  | 256.6  | 288.8  | 236.9  | 0.161519928 | 224.2    | 264.65   | 40.45   | 0.847156622 | 0.1439   | 1.193  |
| 94419_at   | 202.6  | 322.1  | 160.7  | 200.4  | 242.5  | 301    | 260.3  | 311.4  | 0.206841519 | 221.45   | 278.8    | 57.35   | 0.794296987 | 0.152    | 1.295  |
| 94420_f_at | 646.2  | 948.8  | 804    | 733.3  | 1026.3 | 857.8  | 855.6  | 1235.8 | 0.110099408 | 783.075  | 993.875  | 210.8   | 0.787900893 | 0.0945   | 1.267  |
| 94421_r_at | 5.8    | 11.6   | 1.9    | 8      | 4.3    | 17.7   | 1.4    | 6.8    | 0.866823264 | 6.825    | 7.55     | 0.725   | 0.90397351  | 0.8986   | -1.091 |
| 94422_at   | 355.3  | 380.5  | 306.7  | 367.1  | 293.2  | 321.1  | 298    | 331.7  | 0.078251824 | 352.4    | 311      | 41.4    | 1.133118971 | 0.06947  | -1.131 |
| 94423_at   | 119.5  | 176.1  | 202.7  | 105.1  | 130.5  | 129.1  | 114.7  | 109.2  | 0.28749261  | 150.85   | 120.875  | 29.975  | 1.247983454 | 0.2891   | -1.207 |
| 94424_at   | 189.8  | 271.8  | 177.6  | 259.5  | 272.3  | 245    | 301.8  | 222.9  | 0.273168188 | 224.675  | 260.5    | 35.825  | 0.862476008 | 0.2551   | 1.172  |
| 94425_at   | 107.1  | 87.5   | 112.2  | 137    | 118    | 130.8  | 166.5  | 126.7  | 0.147254306 | 110.95   | 135.5    | 24.55   | 0.818819188 | 0.1362   | 1.226  |
| 94426_at   | 1820.7 | 1497.2 | 1632.7 | 1691.4 | 1094   | 1491.5 | 1440.3 | 1606.1 | 0.108292491 | 1660.5   | 1407.975 | 252.525 | 1.179353327 | 0.1136   | -1.188 |
| 94427_at   | 1070.7 | 817.7  | 846.2  | 935.4  | 651    | 1278.1 | 887.5  | 995    | 0.815034967 | 917.5    | 952.9    | 35.4    | 0.962850247 | 0.927    | -1.015 |
| 94428_at   | 556    | 591.1  | 596.8  | 560.5  | 521.1  | 611.1  | 666    | 546.6  | 0.784407991 | 576.1    | 586.2    | 10.1    | 0.982770386 | 0.8278   | -1.013 |
| 94429_at   | 89.8   | 102.8  | 93.3   | 124.6  | 113.2  | 155.4  | 160    | 175.5  | 0.026967643 | 102.625  | 151.025  | 48.4    | 0.679523258 | 0.01923  | 1.465  |
| 94430_at   | 286.8  | 409.8  | 262.2  | 322.2  | 277.4  | 332.2  | 388.2  | 395.6  | 0.533195699 | 320.25   | 348.35   | 28.1    | 0.919334003 | 0.5121   | -1.093 |
| 94431_at   | 253.5  | 244.5  | 328.4  | 277.1  | 229.2  | 318.7  | 217.4  | 189.5  | 0.317607613 | 275.875  | 238.7    | 37.175  | 1.155739422 | 0.2668   | -1.17  |
| 94432_at   | 865.3  | 894.2  | 802.3  | 1070.7 | 653.7  | 955.4  | 1028.2 | 1022.3 | 0.951277711 | 908.125  | 914.9    | 6.775   | 0.992594819 | 0.981    | -1.003 |
| 94433_at   | 1848.4 | 1527.7 | 1603   | 1779.2 | 740.6  | 1582.9 | 1402.6 | 1069.6 | 0.071645144 | 1689.575 | 1198.925 | 490.65  | 1.409241612 | 0.07167  | -1.463 |
| 94434_at   | 357.4  | 283.8  | 216    | 270.3  | 224.1  | 298    | 269    | 348.6  | 0.940412692 | 281.875  | 284.925  | 3.05    | 0.989295429 | 0.9235   | -1.014 |
| 94435_at   | 440.9  | 487.7  | 509.7  | 470.1  | 421.4  | 604.8  | 521.4  | 457.3  | 0.604726016 | 477.1    | 501.225  | 24.125  | 0.951867924 | 0.6441   | -1.042 |
| 94438_at   | 660.1  | 723.7  | 608.2  | 780.6  | 819.9  | 1044.6 | 967    | 970.2  | 0.005843554 | 693.15   | 950.425  | 257.275 | 0.729305311 | 0.005459 | 1.372  |
| 94439_at   | 1159.5 | 1122   | 962.8  | 1246.2 | 965.4  | 1139.2 | 1092.2 | 1282.2 | 0.975087005 | 1122.625 | 1119.75  | 2.875   | 1.002567537 | 0.9676   | -1.003 |
| 94440_at   | 141.5  | 137.6  | 98.4   | 136.3  | 129    | 130.8  | 168.4  | 186.2  | 0.203188184 | 128.45   | 153.6    | 25.15   | 0.836263021 | 0.2088   | 1.193  |
| 94441_at   | 67.2   | 129.6  | 129.5  | 160    | 157.7  | 159.1  | 142    | 154.1  | 0.2029196   | 121.575  | 153.225  | 31.65   | 0.793441018 | 0.1938   | 1.32   |
| 94442_s_at | 144    | 138.1  | 223.5  | 197.3  | 255.7  | 210.5  | 209.1  | 222.1  | 0.098385957 | 175.725  | 224.35   | 48.625  | 0.783262759 | 0.0847   | 1.299  |
| 94445_at   | 2329.5 | 1949   | 2392.6 | 2382.4 | 2066.4 | 2511.9 | 2459.2 | 2023   | 0.991943325 | 2263.375 | 2265.125 | 1.75    | 0.999227416 | 0.9942   | -1.001 |



|            |        |        |        |        |        |        |         |        |             |          |          |         |             |          |        |
|------------|--------|--------|--------|--------|--------|--------|---------|--------|-------------|----------|----------|---------|-------------|----------|--------|
| 94447_at   | 6.1    | 20     | 4.7    | 31.7   | 26.9   | 19.4   | 24.9    | 22.9   | 0.306824175 | 15.625   | 23.525   | 7.9     | 0.664187035 | 0.1839   | 2.005  |
| 94448_at   | 752.5  | 700.2  | 656.7  | 703.5  | 590.1  | 719.8  | 649.2   | 714    | 0.379133423 | 703.225  | 668.275  | 34.95   | 1.052298829 | 0.3672   | -1.054 |
| 94449_at   | 759    | 941.5  | 830.3  | 730.2  | 756.1  | 701.9  | 1026.2  | 992.4  | 0.594181541 | 815.25   | 869.15   | 53.9    | 0.937985388 | 0.6363   | -1.057 |
| 94450_at   | 632    | 683.2  | 660.3  | 851.4  | 413.2  | 832    | 529     | 831.5  | 0.661469991 | 706.725  | 651.425  | 55.3    | 1.084890816 | 0.5482   | -1.126 |
| 94451_at   | 443.1  | 566.2  | 667.3  | 608.1  | 438.7  | 541.8  | 606.8   | 588.6  | 0.670046524 | 571.175  | 543.975  | 27.2    | 1.050002298 | 0.7043   | -1.047 |
| 94452_g_at | 833.5  | 887.6  | 1007.8 | 937.1  | 720.8  | 1071.5 | 1107.1  | 874.3  | 0.79610648  | 916.5    | 943.425  | 26.925  | 0.97146037  | 0.8803   | -1.017 |
| 94453_at   | 612    | 615.3  | 593.6  | 738.3  | 1141   | 671.5  | 749.2   | 665.2  | 0.238800206 | 639.8    | 806.725  | 166.925 | 0.793083145 | 0.1753   | 1.233  |
| 94454_at   | 2785   | 2146.4 | 2344.4 | 2528.6 | 1671.2 | 2614   | 2080.7  | 1959.8 | 0.179843356 | 2451.1   | 2081.425 | 369.675 | 1.177606688 | 0.1623   | -1.188 |
| 94455_at   | 2690.3 | 2001.2 | 2063.9 | 1960.8 | 2507.8 | 2111.6 | 2296.1  | 1728.6 | 0.9421845   | 2179.05  | 2161.025 | 18.025  | 1.008340949 | 0.9365   | -1.009 |
| 94456_at   | 1743.8 | 2564.2 | 2137.6 | 2157.5 | 2351.3 | 2340.7 | 2029.2  | 1765.2 | 0.898291329 | 2150.775 | 2121.6   | 29.175  | 1.013751414 | 0.9174   | -1.011 |
| 94457_at   | 883.7  | 1031.9 | 1010.4 | 944.9  | 1124.1 | 1119.5 | 1099    | 1144.8 | 0.015773395 | 967.725  | 1121.85  | 154.125 | 0.862615323 | 0.00607  | 1.161  |
| 94458_at   | 636.7  | 578.3  | 536.4  | 556.2  | 805.9  | 835.9  | 793.4   | 649.9  | 0.010928658 | 576.9    | 771.275  | 194.375 | 0.747982237 | 0.005319 | 1.333  |
| 94459_at   | 584.7  | 597.6  | 539.3  | 485    | 592.1  | 498.8  | 410.3   | 604.3  | 0.648498639 | 551.65   | 526.375  | 25.275  | 1.048017098 | 0.6052   | -1.057 |
| 94460_at   | 573.3  | 764.4  | 896.2  | 722    | 614.3  | 820.5  | 804.5   | 842.9  | 0.7232443   | 738.975  | 770.55   | 31.575  | 0.959022776 | 0.7069   | -1.048 |
| 94461_at   | 519.2  | 371    | 531.8  | 607.5  | 448.5  | 613.1  | 512.5   | 394.4  | 0.830572488 | 507.375  | 492.125  | 15.25   | 1.030988062 | 0.8477   | -1.029 |
| 94462_at   | 1082.9 | 999    | 1100.5 | 928.4  | 1327.2 | 979.3  | 1131.3  | 1011.2 | 0.387304979 | 1027.7   | 1112.25  | 84.55   | 0.923982918 | 0.3848   | -1.077 |
| 94463_at   | 284.1  | 234.6  | 255.3  | 271.9  | 208.1  | 260.8  | 241     | 233.6  | 0.14508931  | 261.475  | 235.875  | 25.6    | 1.108532061 | 0.1492   | -1.109 |
| 94464_at   | 472.4  | 382.6  | 417.4  | 557.6  | 414    | 504.5  | 510.1   | 464.4  | 0.736315542 | 457.5    | 473.25   | 15.75   | 0.966719493 | 0.6843   | -1.041 |
| 94465_g_at | 392.2  | 281.5  | 291    | 380.3  | 317.9  | 388.4  | 428     | 306.2  | 0.581934628 | 336.25   | 360.125  | 23.875  | 0.933703575 | 0.5748   | -1.073 |
| 94466_f_at | 1777.6 | 1197.9 | 1288.5 | 1499   | 1223.4 | 1293.3 | 1260.8  | 1434.4 | 0.374207802 | 1440.75  | 1302.975 | 137.775 | 1.10573879  | 0.3718   | -1.095 |
| 94467_at   | 204.9  | 120.1  | 128    | 166.1  | 109.5  | 165.8  | 106.7   | 159.7  | 0.471446385 | 154.775  | 135.425  | 19.35   | 1.142883515 | 0.4701   | -1.141 |
| 94468_at   | 183.3  | 175.2  | 211.8  | 203.6  | 223.2  | 204.3  | 176.2   | 184.1  | 0.807011796 | 193.475  | 196.95   | 3.475   | 0.982355928 | 0.8193   | -1.017 |
| 94469_at   | 2350.7 | 1970.4 | 2166.2 | 2446.1 | 2083.1 | 2582   | 2400.3  | 2500.5 | 0.337383095 | 2233.35  | 2391.475 | 158.125 | 0.933879719 | 0.3481   | -1.071 |
| 94470_i_at | 324.4  | 271.3  | 275.1  | 358.5  | 269.2  | 280.2  | 246.1   | 333.1  | 0.401540084 | 307.325  | 282.15   | 25.175  | 1.089225589 | 0.3951   | -1.088 |
| 94471_r_at | 244    | 221.7  | 313.6  | 342.4  | 243.1  | 242.8  | 233.8   | 272.6  | 0.344638137 | 280.425  | 248.075  | 32.35   | 1.130404112 | 0.3519   | -1.115 |
| 94472_at   | 300    | 243.9  | 249.1  | 258.2  | 236.7  | 257.1  | 268.8   | 263.9  | 0.690506405 | 262.8    | 256.625  | 6.175   | 1.024062348 | 0.7063   | -1.022 |
| 94473_at   | 3618.8 | 3062.8 | 3252   | 3346.8 | 2463.6 | 3876.5 | 3371.9  | 3261.1 | 0.819243014 | 3320.1   | 3243.275 | 76.825  | 1.023687476 | 0.7433   | -1.035 |
| 94476_at   | 30.8   | 19.5   | 36.8   | 31     | 53.6   | 46.4   | 57.9    | 43.9   | 0.005154927 | 29.525   | 50.45    | 20.925  | 0.585232904 | 0.01021  | 1.743  |
| 94477_at   | 57.1   | 79.4   | 59.7   | 51.7   | 110.4  | 65.8   | 53.3    | 75.1   | 0.353537614 | 61.975   | 76.15    | 14.175  | 0.813854235 | 0.3449   | 1.201  |
| 94478_at   | 1387.2 | 1783.2 | 1476.1 | 1719.9 | 1357.2 | 1762.7 | 1541.5  | 1196.6 | 0.443942158 | 1591.6   | 1464.5   | 127.1   | 1.086787299 | 0.4233   | -1.092 |
| 94479_at   | 5.5    | 5.9    | 6.2    | 4.2    | 2.9    | 3.4    | 5.3     | 2.6    | 0.048066014 | 5.45     | 3.55     | 1.9     | 1.535211268 | 0.04351  | -1.579 |
| 94480_at   | 285.6  | 299.9  | 348    | 390.7  | 271.6  | 384.4  | 354.8   | 440.6  | 0.487294329 | 331.05   | 362.85   | 31.8    | 0.91236048  | 0.5232   | -1.088 |
| 94481_at   | 465.2  | 452.3  | 431.1  | 432.8  | 541    | 591.7  | 495.4   | 446.5  | 0.096046063 | 445.35   | 518.65   | 73.3    | 0.858671551 | 0.0576   | 1.159  |
| 94482_at   | 272.9  | 465.6  | 310.9  | 436.7  | 483.8  | 372.9  | 427.4   | 430.7  | 0.330346176 | 371.525  | 428.7    | 57.175  | 0.866631677 | 0.2867   | 1.178  |
| 94483_at   | 419.5  | 654.2  | 465.5  | 496.2  | 519.6  | 550.4  | 531.5   | 320.9  | 0.715676184 | 508.85   | 480.6    | 28.25   | 1.058780691 | 0.6948   | -1.068 |
| 94484_at   | 1045.3 | 1139.9 | 1050.4 | 1089   | 1215.7 | 1199.2 | 1118.8  | 1486.6 | 0.115181099 | 1081.15  | 1255.075 | 173.925 | 0.861422624 | 0.06648  | 1.155  |
| 94485_at   | 1992.2 | 1479.2 | 1665   | 1639.3 | 1852.9 | 1793.7 | 1787.1  | 1831.7 | 0.339069728 | 1693.925 | 1816.35  | 122.425 | 0.932598343 | 0.2721   | -1.078 |
| 94486_at   | 1866.3 | 2251.2 | 2174.5 | 2021.8 | 1615.5 | 2086.2 | 1714.4  | 1960.3 | 0.143108155 | 2078.45  | 1844.1   | 234.35  | 1.127080961 | 0.141    | -1.13  |
| 94488_at   | 678    | 663.7  | 704.9  | 616.2  | 550.2  | 652.7  | 610.5   | 590.8  | 0.063009538 | 665.7    | 601.05   | 64.65   | 1.107561767 | 0.06396  | -1.108 |
| 94489_at   | 3123.1 | 3645.3 | 3408.9 | 3442.3 | 2967.5 | 3554.5 | 3191.3  | 3177.1 | 0.305464918 | 3404.9   | 3222.6   | 182.3   | 1.05656923  | 0.3005   | -1.057 |
| 94490_at   | 568.5  | 441.2  | 566.3  | 429.1  | 503.6  | 584.7  | 461.3   | 416.3  | 0.857866953 | 501.275  | 491.475  | 9.8     | 1.019939977 | 0.8644   | -1.019 |
| 94491_at   | 263.7  | 244.7  | 272    | 220.2  | 172    | 183.4  | 207.4   | 190    | 0.005879658 | 250.15   | 188.2    | 61.95   | 1.329171095 | 0.003507 | -1.328 |
| 94492_at   | 9539.3 | 8997.1 | 8771.1 | 8092.5 | 12015  | 8498.6 | 10418.6 | 8162   | 0.3889614   | 8850     | 9773.55  | 923.55  | 0.905505164 | 0.3946   | -1.093 |
| 94493_at   | 85.3   | 63.6   | 62.3   | 89.8   | 86     | 110.2  | 108.3   | 92.3   | 0.043578994 | 75.25    | 99.2     | 23.95   | 0.758568548 | 0.04609  | 1.329  |
| 94494_at   | 881.2  | 505.1  | 637.8  | 599.1  | 461.1  | 484.1  | 480.6   | 487.5  | 0.113270407 | 655.8    | 478.325  | 177.475 | 1.371034339 | 0.0454   | -1.343 |
| 94495_at   | 30.9   | 14.2   | 10.3   | 27.4   | 39.9   | 11.6   | 6.8     | 18.7   | 0.875901484 | 20.7     | 19.25    | 1.45    | 1.075324675 | 0.6935   | -1.209 |
| 94499_at   | 1116.9 | 1736   | 1352.7 | 1471.7 | 1196.4 | 1613.5 | 1381.9  | 999.4  | 0.532860406 | 1419.325 | 1297.8   | 121.525 | 1.093639236 | 0.5255   | -1.097 |
| 94501_at   | 541.4  | 595.9  | 437.3  | 561.7  | 409.4  | 457.6  | 421.1   | 445    | 0.054341896 | 534.075  | 433.275  | 100.8   | 1.232646702 | 0.03007  | -1.226 |
| 94502_at   | 2739.6 | 2240.4 | 2539.3 | 2166.3 | 3134.2 | 2403.1 | 2842.1  | 1924.4 | 0.626347017 | 2421.4   | 2575.95  | 154.55  | 0.940002717 | 0.6929   | -1.051 |
| 94503_at   | 1393.8 | 1141.3 | 1609.7 | 1407.6 | 1265.1 | 1388.5 | 1636.2  | 1157.9 | 0.858519918 | 1388.1   | 1361.925 | 26.175  | 1.01921912  | 0.8519   | -1.02  |
| 94504_at   | 336.2  | 455.8  | 320.2  | 193.9  | 382.9  | 402.8  | 378.3   | 335.4  | 0.440115841 | 326.525  | 374.85   | 48.325  | 0.871081766 | 0.3582   | 1.198  |
| 94505_at   | 395.5  | 436.4  | 374.6  | 540.7  | 409.3  | 440.5  | 407.1   | 348.3  | 0.436836683 | 436.8    | 401.3    | 35.5    | 1.088462497 | 0.4409   | -1.081 |
| 94506_at   | 1264.5 | 1367   | 1154.4 | 1404.2 | 1258.7 | 1082.3 | 1191.6  | 1098   | 0.095860061 | 1297.525 | 1157.65  | 139.875 | 1.120826675 | 0.09247  | -1.12  |
| 94507_at   | 94.7   | 102.4  | 101.2  | 97.9   | 97.8   | 147.8  | 118.9   | 111.4  | 0.154637906 | 99.05    | 118.975  | 19.925  | 0.832527842 | 0.09816  | 1.188  |
| 94508_at   | 1197.7 | 1019.9 | 962.6  | 926.3  | 1173.7 | 910.2  | 1045.5  | 934.6  | 0.904789328 | 1026.625 | 1016     | 10.625  | 1.010457677 | 0.8996   | -1.011 |
| 94509_at   | 861.3  | 586.1  | 889    | 844.5  | 791.8  | 668    | 726.7   | 658.2  | 0.333548786 | 795.225  | 711.175  | 84.05   | 1.118184694 | 0.3803   | -1.106 |



|            |        |        |        |        |         |        |        |        |             |          |          |         |             |         |        |
|------------|--------|--------|--------|--------|---------|--------|--------|--------|-------------|----------|----------|---------|-------------|---------|--------|
| 94510_at   | 1156.1 | 1051.7 | 1473.3 | 1423.1 | 982.6   | 1271.2 | 1243.9 | 1029.5 | 0.299461167 | 1276.05  | 1131.8   | 144.25  | 1.127451847 | 0.3066  | -1.124 |
| 94511_at   | 516.2  | 334.6  | 449.7  | 447.8  | 343.2   | 354.3  | 373.6  | 405.5  | 0.169593904 | 437.075  | 369.15   | 67.925  | 1.184003792 | 0.1569  | -1.172 |
| 94512_f_at | 263.8  | 207.7  | 196.3  | 210    | 142.2   | 279.1  | 162.7  | 222.8  | 0.631314844 | 219.45   | 201.7    | 17.75   | 1.088001983 | 0.5217  | -1.119 |
| 94513_r_at | 61     | 40.4   | 41.7   | 22.2   | 17.2    | 36.9   | 23.9   | 15.9   | 0.112766238 | 41.325   | 23.475   | 17.85   | 1.760383387 | 0.09452 | -1.752 |
| 94514_s_at | 1869   | 1265.2 | 1502.2 | 1132   | 1144.6  | 1496.4 | 1364   | 1052.2 | 0.393628237 | 1442.1   | 1264.3   | 177.8   | 1.140631179 | 0.3992  | -1.131 |
| 94515_at   | 190.1  | 150.8  | 193    | 136.7  | 203.9   | 153.9  | 170.2  | 189.2  | 0.539424279 | 167.65   | 179.3    | 11.65   | 0.935025098 | 0.5174  | -1.075 |
| 94516_f_at | 4190.4 | 3772.1 | 3073.9 | 2978.4 | 3430.3  | 4117.4 | 3623.9 | 5575.4 | 0.28158394  | 3503.7   | 4186.75  | 683.05  | 0.836854362 | 0.2587  | 1.185  |
| 94517_r_at | 326.7  | 363.5  | 294.5  | 243    | 306.4   | 325.5  | 300.6  | 321.3  | 0.818124154 | 306.925  | 313.45   | 6.525   | 0.979183283 | 0.7333  | -1.032 |
| 94518_at   | 1873.4 | 1638.4 | 1480.2 | 1618   | 1647.2  | 1419.2 | 1454.1 | 1544.3 | 0.215394649 | 1652.5   | 1516.2   | 136.3   | 1.089895792 | 0.2027  | -1.088 |
| 94520_at   | 25.1   | 14.2   | 45.5   | 21.8   | 19.6    | 54.6   | 18     | 45.5   | 0.522509688 | 26.65    | 34.425   | 7.775   | 0.774146696 | 0.5632  | 1.256  |
| 94521_at   | 863.7  | 616    | 737.2  | 643.8  | 671.6   | 548.1  | 578.5  | 547.6  | 0.102658506 | 715.175  | 586.45   | 128.725 | 1.219498678 | 0.07556 | -1.213 |
| 94522_at   | 2031.1 | 1813.2 | 1750.8 | 1967.3 | 2038.6  | 1658.2 | 2037.7 | 1787.5 | 0.933271913 | 1890.6   | 1880.5   | 10.1    | 1.005370912 | 0.9076  | -1.007 |
| 94524_at   | 695.3  | 734.1  | 923.3  | 885.3  | 712.7   | 759.6  | 710.4  | 1044.8 | 0.979528222 | 809.5    | 806.875  | 2.625   | 1.003253292 | 0.9373  | -1.009 |
| 94526_at   | 912.6  | 874.1  | 1022.1 | 984    | 1306.6  | 940.3  | 1097   | 983.8  | 0.205477501 | 948.2    | 1081.925 | 133.725 | 0.87640086  | 0.1734  | 1.134  |
| 94527_at   | 4.8    | 7.9    | 5.5    | 7.5    | 8.4     | 8.4    | 7.1    | 4.4    | 0.61062508  | 6.425    | 7.075    | 0.65    | 0.908127208 | 0.6589  | -1.095 |
| 94528_at   | 548.7  | 621.6  | 629.3  | 604.8  | 708.3   | 504.1  | 496.7  | 582.6  | 0.620629388 | 601.1    | 572.925  | 28.175  | 1.049177467 | 0.5412  | -1.059 |
| 94530_at   | 340.3  | 429.3  | 305.7  | 386.4  | 491     | 394.8  | 542    | 420.6  | 0.067622781 | 365.425  | 462.1    | 96.675  | 0.790792036 | 0.06332 | 1.265  |
| 94531_at   | 486.6  | 627.1  | 584.6  | 404.2  | 679.1   | 668.5  | 588.6  | 645.6  | 0.091353564 | 525.625  | 645.45   | 119.825 | 0.814354326 | 0.08015 | 1.244  |
| 94532_at   | 1266.7 | 998.9  | 1247.6 | 1218.2 | 1272.3  | 979.2  | 1315.7 | 880.4  | 0.593181816 | 1182.85  | 1111.9   | 70.95   | 1.063809695 | 0.5485  | -1.074 |
| 94534_at   | 489.2  | 429.2  | 438.3  | 386.3  | 540     | 413.7  | 419.4  | 402.7  | 0.839512905 | 435.75   | 443.95   | 8.2     | 0.981529452 | 0.8653  | -1.015 |
| 94535_at   | 2157.9 | 2661.2 | 2279.3 | 2199   | 1999.4  | 2305.5 | 2074.1 | 2446.5 | 0.474599104 | 2324.35  | 2206.375 | 117.975 | 1.053470058 | 0.4661  | -1.053 |
| 94536_s_at | 6286.8 | 6655   | 6591.7 | 6020.7 | 10345.1 | 5220.5 | 7688   | 6021.7 | 0.473029992 | 6388.55  | 7318.825 | 930.275 | 0.872892848 | 0.5251  | -1.108 |
| 94537_at   | 5568.6 | 5417.9 | 5865.5 | 5273.7 | 8761.4  | 4895.7 | 6576.8 | 4802.2 | 0.492193453 | 5531.425 | 6259.025 | 727.6   | 0.883751862 | 0.5413  | 1.098  |
| 94539_f_at | 23.6   | 13.2   | 14     | 19.6   | 19.4    | 18.2   | 20.1   | 10.4   | 0.868445435 | 17.6     | 17.025   | 0.575   | 1.033773862 | 0.8696  | -1.036 |
| 94540_at   | 12.3   | 15.2   | 11.6   | 13     | 11.7    | 18.1   | 13.4   | 13.3   | 0.520430093 | 13.025   | 14.125   | 1.1     | 0.922123894 | 0.5369  | -1.074 |
| 94541_at   | 142.5  | 121.3  | 157.6  | 160    | 159.4   | 171.9  | 148.3  | 166.2  | 0.17983407  | 145.35   | 161.45   | 16.1    | 0.900278724 | 0.1749  | 1.116  |
| 94542_at   | 330.5  | 307.8  | 333.3  | 319.5  | 230.3   | 377.8  | 306.4  | 361.6  | 0.918273384 | 322.775  | 319.025  | 3.75    | 1.011754565 | 0.8057  | -1.03  |
| 94543_at   | 177.1  | 116.6  | 176.4  | 99.2   | 236.3   | 166.6  | 134.8  | 216    | 0.184516665 | 142.325  | 188.425  | 46.1    | 0.755340321 | 0.1886  | 1.334  |
| 94545_at   | 93.1   | 110.7  | 106.5  | 50.8   | 100.1   | 91     | 72.1   | 123.3  | 0.72735146  | 90.275   | 96.625   | 6.35    | 0.934282018 | 0.6768  | -1.098 |
| 94548_at   | 1631.4 | 1518.6 | 1741.9 | 1652.6 | 1224.4  | 1641.8 | 1662.6 | 1509.8 | 0.31496007  | 1636.125 | 1509.65  | 126.475 | 1.083777697 | 0.2993  | -1.09  |
| 94549_at   | 680.5  | 676.6  | 590.2  | 748.7  | 679.4   | 693.4  | 713.1  | 633.3  | 0.88103301  | 674      | 679.8    | 5.8     | 0.991468079 | 0.8467  | -1.011 |
| 94550_at   | 1137.3 | 1054.4 | 1173.3 | 1122.9 | 1071.7  | 1131.7 | 1163.8 | 957.8  | 0.469378629 | 1121.975 | 1081.25  | 40.725  | 1.03766474  | 0.4529  | -1.04  |
| 94551_at   | 437.6  | 363.8  | 359.3  | 493.5  | 367     | 366.7  | 247.9  | 554.2  | 0.696032095 | 413.55   | 383.95   | 29.6    | 1.077093372 | 0.5805  | -1.112 |
| 94552_at   | 3951.8 | 5891.6 | 4615.6 | 4607.2 | 3886.9  | 4239.8 | 3952.9 | 3790.7 | 0.142045186 | 4766.55  | 3967.575 | 798.975 | 1.201376155 | 0.08957 | -1.19  |
| 94554_at   | 283.2  | 342.8  | 234.9  | 305.4  | 251.8   | 353.1  | 343.9  | 287.3  | 0.615141799 | 291.575  | 309.025  | 17.45   | 0.943532077 | 0.6244  | -1.06  |
| 94555_at   | 1987.5 | 2513   | 2527.6 | 2120.1 | 2310.2  | 2549.2 | 2344.1 | 2352.4 | 0.528879198 | 2287.05  | 2388.975 | 101.925 | 0.957335259 | 0.4831  | -1.05  |
| 94556_at   | 175    | 186.6  | 147.8  | 171.5  | 153.3   | 154.6  | 164    | 162.2  | 0.250471779 | 170.225  | 158.525  | 11.7    | 1.073805393 | 0.2396  | -1.07  |
| 94557_at   | 25.7   | 29.8   | 19.1   | 58.1   | 11.6    | 31     | 51.2   | 56.1   | 0.758317593 | 33.175   | 37.475   | 4.3     | 0.885256838 | 0.9099  | -1.052 |
| 94558_g_at | 758.5  | 839.1  | 707.5  | 723    | 821.5   | 718.2  | 777.9  | 917.5  | 0.355719946 | 757.025  | 808.775  | 51.75   | 0.936014343 | 0.3532  | -1.066 |
| 94559_at   | 204.7  | 301.2  | 186.6  | 265.7  | 228.8   | 260.6  | 260.8  | 248.5  | 0.735517991 | 239.55   | 249.675  | 10.125  | 0.959447281 | 0.6295  | -1.061 |
| 94561_at   | 597.8  | 445.9  | 629.3  | 555.6  | 508.5   | 545.3  | 719    | 573.5  | 0.647286448 | 557.15   | 586.575  | 29.425  | 0.949835912 | 0.6488  | -1.052 |
| 94562_at   | 552.6  | 429.2  | 427.4  | 456.7  | 325.3   | 383.8  | 448.7  | 472.7  | 0.234260874 | 466.475  | 407.625  | 58.85   | 1.144372892 | 0.2264  | -1.15  |
| 94563_at   | 3.2    | 5.4    | 4.3    | 4.2    | 16.9    | 11.1   | 7.1    | 5      | 0.114008024 | 4.275    | 10.025   | 5.75    | 0.426433915 | 0.03688 | 2.152  |
| 94564_at   | 183    | 147.5  | 140.1  | 167.6  | 211     | 186.8  | 154.1  | 176.2  | 0.194346138 | 159.55   | 182.025  | 22.475  | 0.876527949 | 0.1917  | 1.14   |
| 94565_at   | 35.3   | 13.4   | 25.5   | 17.6   | 47.2    | 49.4   | 8      | 21     | 0.490238065 | 22.95    | 31.4     | 8.45    | 0.73089172  | 0.7593  | 1.165  |
| 94566_at   | 17.6   | 51.2   | 25     | 26.8   | 23.7    | 23.7   | 24.5   | 30     | 0.571555195 | 30.15    | 25.475   | 4.675   | 1.183513248 | 0.6925  | -1.1   |
| 94568_at   | 13.5   | 38.9   | 9.5    | 14     | 34.8    | 25.3   | 10.4   | 11.6   | 0.867559667 | 18.975   | 20.525   | 1.55    | 0.924482339 | 0.8144  | -1.109 |
| 94571_at   | 4.3    | 3.8    | 5.5    | 4.9    | 3.1     | 7.4    | 4.9    | 5.6    | 0.551528189 | 4.625    | 5.25     | 0.625   | 0.880952381 | 0.682   | 1.09   |
| 94618_at   | 43     | 21.8   | 35.2   | 25.7   | 45.9    | 31.1   | 34.1   | 27.2   | 0.632663324 | 31.425   | 34.575   | 3.15    | 0.908893709 | 0.577   | 1.117  |
| 94619_at   | 85.1   | 112.2  | 125.4  | 95.5   | 198.2   | 130.3  | 132.6  | 177.8  | 0.037982442 | 104.55   | 159.725  | 55.175  | 0.654562529 | 0.02164 | 1.519  |
| 94621_at   | 294.3  | 291.2  | 267.6  | 247.5  | 317     | 256.7  | 240.3  | 304.9  | 0.84018649  | 275.15   | 279.725  | 4.575   | 0.983644651 | 0.8801  | -1.012 |
| 94622_at   | 46.8   | 22.3   | 42.6   | 56     | 56.4    | 79.8   | 40.9   | 39.5   | 0.341504049 | 41.925   | 54.15    | 12.225  | 0.774238227 | 0.3404  | 1.308  |
| 94623_at   | 28.8   | 45.4   | 64.3   | 63.9   | 52.9    | 51.3   | 56.6   | 69.4   | 0.499434163 | 50.6     | 57.55    | 6.95    | 0.879235447 | 0.4273  | 1.187  |
| 94624_at   | 5.3    | 4.8    | 22.3   | 42.9   | 33.4    | 23.6   | 20.5   | 13     | 0.720535133 | 18.825   | 22.625   | 3.8     | 0.832044199 | 0.3855  | 1.714  |
| 94625_at   | 158.5  | 28.4   | 108.6  | 122.8  | 112.9   | 115.7  | 111.3  | 158.4  | 0.53786648  | 104.575  | 124.575  | 20      | 0.839454144 | 0.4269  | 1.4    |
| 94626_at   | 27.1   | 51     | 37     | 103.7  | 24.2    | 23.1   | 101.5  | 95.8   | 0.823318368 | 54.7     | 61.15    | 6.45    | 0.894521668 | 0.9898  | -1.007 |



|            |       |       |       |       |       |       |       |        |             |         |         |        |             |           |        |
|------------|-------|-------|-------|-------|-------|-------|-------|--------|-------------|---------|---------|--------|-------------|-----------|--------|
| 94627_at   | 43.3  | 74.1  | 74.2  | 59.2  | 99    | 65    | 60.5  | 63.5   | 0.456944679 | 62.7    | 72      | 9.3    | 0.870833333 | 0.442     | 1.151  |
| 94628_r_at | 20.2  | 25.7  | 33.5  | 22.3  | 50.6  | 14.7  | 17.8  | 27.5   | 0.810031887 | 25.425  | 27.65   | 2.225  | 0.919529837 | 0.9574    | -1.017 |
| 94630_at   | 7.5   | 26.7  | 29.2  | 29.1  | 14.4  | 26    | 39.6  | 27.2   | 0.634797406 | 23.125  | 26.8    | 3.675  | 0.862873134 | 0.601     | 1.241  |
| 94631_at   | 23.9  | 35.2  | 66.7  | 40.1  | 39.8  | 71.3  | 149.2 | 42.5   | 0.279195702 | 41.475  | 75.7    | 34.225 | 0.547886394 | 0.2107    | 1.683  |
| 94632_at   | 4.5   | 17.5  | 5.4   | 9.1   | 3.2   | 4     | 16.6  | 28.2   | 0.5871378   | 9.125   | 13      | 3.875  | 0.701923077 | 0.8675    | 1.112  |
| 94633_at   | 22.7  | 5.7   | 13.2  | 13.1  | 4.6   | 13.5  | 43.2  | 15.7   | 0.570450532 | 13.675  | 19.25   | 5.575  | 0.71038961  | 0.781     | 1.17   |
| 94634_at   | 133.7 | 26.5  | 109.3 | 112.5 | 32.9  | 35.5  | 116.8 | 91.8   | 0.437442037 | 95.5    | 69.25   | 26.25  | 1.379061372 | 0.5531    | -1.366 |
| 94635_at   | 15.8  | 75.8  | 19.1  | 47    | 90.3  | 16.6  | 78.8  | 21.8   | 0.618842368 | 39.425  | 51.875  | 12.45  | 0.76        | 0.7151    | 1.245  |
| 94636_at   | 14.9  | 14.9  | 9.2   | 12.6  | 14.6  | 10.9  | 14.7  | 9.6    | 0.817913056 | 12.9    | 12.45   | 0.45   | 1.036144578 | 0.8407    | -1.033 |
| 94637_at   | 64.8  | 65.2  | 33.2  | 82.1  | 98.9  | 41.5  | 54.6  | 98.9   | 0.529671487 | 61.325  | 73.475  | 12.15  | 0.834637632 | 0.5973    | 1.178  |
| 94638_at   | 5.1   | 2.6   | 3.5   | 1.8   | 7.4   | 1.5   | 4.6   | 3.6    | 0.502672711 | 3.25    | 4.275   | 1.025  | 0.760233918 | 0.652     | 1.212  |
| 94639_at   | 4.1   | 6.9   | 3.5   | 5.2   | 5.3   | 4.3   | 2.6   | 3.5    | 0.331947548 | 4.925   | 3.925   | 1      | 1.25477707  | 0.3409    | -1.246 |
| 94640_at   | 23.4  | 10.6  | 11.4  | 23.6  | 5.3   | 4.8   | 19.2  | 4.4    | 0.134117121 | 17.25   | 8.425   | 8.825  | 2.047477745 | 0.08253   | -2.349 |
| 94641_at   | 12.3  | 21.2  | 16    | 1.5   | 37.9  | 22.5  | 19.7  | 8.3    | 0.258335815 | 12.75   | 22.1    | 9.35   | 0.576923077 | 0.2979    | 2.172  |
| 94642_at   | 20.8  | 36.2  | 30    | 40.8  | 39.4  | 27.7  | 51    | 43.1   | 0.246625694 | 31.95   | 40.3    | 8.35   | 0.79280397  | 0.2677    | 1.27   |
| 94643_at   | 42.5  | 63.8  | 68.9  | 85.4  | 64.8  | 70.3  | 48.9  | 87.3   | 0.829313637 | 65.15   | 67.825  | 2.675  | 0.960560265 | 0.8015    | -1.051 |
| 94644_at   | 69.9  | 34.3  | 44.7  | 91.9  | 45.4  | 58.5  | 55    | 54.6   | 0.639004023 | 60.2    | 53.375  | 6.825  | 1.127868852 | 0.8218    | -1.055 |
| 94645_at   | 39.4  | 6.6   | 14.7  | 8.7   | 3.9   | 55.5  | 7.4   | 4.6    | 0.974141855 | 17.35   | 17.85   | 0.5    | 0.971988796 | 0.6195    | -1.463 |
| 94657_at   | 1     | 0.8   | 1.5   | 5.7   | 2     | 1     | 1     | 7.6    | 0.752828375 | 2.25    | 2.9     | 0.65   | 0.775862069 | 0.7739    | 1.215  |
| 94662_at   | 118.3 | 192.2 | 208.1 | 186.4 | 259.4 | 268.9 | 300.8 | 281.9  | 0.008656051 | 176.25  | 277.75  | 101.5  | 0.634563456 | 0.01112   | 1.61   |
| 94663_at   | 32.5  | 47.6  | 11.1  | 58.9  | 38.2  | 29.4  | 31.1  | 38.1   | 0.772367257 | 37.525  | 34.2    | 3.325  | 1.097222222 | 0.8626    | -1.07  |
| 94664_at   | 27.4  | 4     | 6.6   | 3.9   | 6.5   | 8.4   | 7.7   | 5.6    | 0.589999544 | 10.475  | 7.05    | 3.425  | 1.485815603 | 0.9328    | -1.042 |
| 94665_at   | 428.1 | 386.1 | 574.4 | 546.1 | 487.2 | 418.9 | 395.9 | 479    | 0.486724832 | 483.675 | 445.25  | 38.425 | 1.086299832 | 0.524     | -1.076 |
| 94667_at   | 42.4  | 88    | 128.6 | 112.6 | 56    | 98.4  | 82.4  | 35.6   | 0.333006184 | 92.9    | 68.1    | 24.8   | 1.364170338 | 0.4023    | -1.352 |
| 94668_at   | 5.3   | 33.4  | 27.1  | 6.2   | 3.7   | 17.2  | 7.2   | 8.6    | 0.318959031 | 18      | 9.175   | 8.825  | 1.961852861 | 0.4133    | -1.661 |
| 94674_at   | 38.3  | 49.1  | 38.7  | 66.3  | 9.4   | 53.9  | 48.8  | 48.5   | 0.543996187 | 48.1    | 40.15   | 7.95   | 1.198007472 | 0.4584    | -1.416 |
| 94683_at   | 27.5  | 12.1  | 27.9  | 51.3  | 61.5  | 29.5  | 19.3  | 75.3   | 0.329538501 | 29.7    | 46.4    | 16.7   | 0.640086207 | 0.3619    | 1.535  |
| 94684_at   | 6.1   | 5.1   | 28.9  | 5.2   | 18.3  | 6     | 3.9   | 21.4   | 0.888304103 | 11.325  | 12.4    | 1.075  | 0.913306452 | 0.785     | 1.184  |
| 94685_at   | 9.4   | 43.8  | 13.1  | 32    | 7.1   | 12.1  | 15.5  | 41.1   | 0.630257747 | 24.575  | 18.95   | 5.625  | 1.296833773 | 0.5952    | -1.336 |
| 94686_at   | 7.4   | 6.6   | 9.4   | 27    | 11.5  | 15.8  | 9.9   | 11.7   | 0.944375098 | 12.6    | 12.225  | 0.375  | 1.030674847 | 0.7016    | 1.145  |
| 94687_at   | 2.3   | 4.1   | 19.2  | 5     | 7.1   | 3.2   | 3.8   | 2      | 0.427543641 | 7.65    | 4.025   | 3.625  | 1.900621118 | 0.4494    | -1.524 |
| 94688_at   | 8.7   | 9     | 9     | 8.7   | 6     | 5.2   | 5.3   | 6.1    | 0.00027633  | 8.85    | 5.65    | 3.2    | 1.566371681 | 0.0000429 | -1.576 |
| 94689_at   | 364.1 | 894.1 | 771.8 | 765.7 | 962.6 | 955.5 | 753.5 | 1098.1 | 0.132537482 | 698.925 | 942.425 | 243.5  | 0.741624002 | 0.1646    | 1.41   |
| 94690_at   | 9.8   | 11.6  | 7.1   | 4.3   | 8.6   | 9.1   | 12.3  | 7.7    | 0.543877125 | 8.2     | 9.425   | 1.225  | 0.870026525 | 0.4591    | 1.209  |
| 94691_at   | 8.9   | 40.6  | 58.7  | 46.3  | 13.2  | 64    | 45.2  | 7.8    | 0.734301149 | 38.625  | 32.55   | 6.075  | 1.186635945 | 0.665     | -1.348 |
| 94692_at   | 44.3  | 73.5  | 21.3  | 52.9  | 28.4  | 60.7  | 76.6  | 69.9   | 0.499976854 | 48      | 58.9    | 10.9   | 0.814940577 | 0.53      | 1.259  |
| 94693_at   | 9.2   | 4.7   | 5.1   | 7.5   | 7.2   | 18.7  | 20    | 36.3   | 0.100706354 | 6.625   | 20.55   | 13.925 | 0.322384428 | 0.03279   | 2.785  |
| 94694_at   | 32.1  | 35    | 33.6  | 11.8  | 57.6  | 41.8  | 34.8  | 33.7   | 0.124775829 | 28.125  | 41.975  | 13.85  | 0.670041691 | 0.1624    | 1.586  |
| 94695_at   | 115.1 | 126.6 | 133.2 | 163   | 126.7 | 106.3 | 133.1 | 186.5  | 0.861019251 | 134.475 | 138.15  | 3.675  | 0.97339848  | 0.9238    | -1.014 |
| 94696_at   | 17.9  | 17.3  | 20.1  | 20.8  | 28.6  | 24.4  | 30.7  | 20.1   | 0.053671508 | 19.025  | 25.95   | 6.925  | 0.733140655 | 0.02793   | 1.349  |
| 94697_at   | 88.5  | 73.6  | 93.7  | 71    | 86.7  | 106.5 | 134.7 | 109.4  | 0.061216664 | 81.7    | 109.325 | 27.625 | 0.747313057 | 0.04489   | 1.331  |
| 94698_at   | 106.5 | 56.5  | 79.2  | 105.2 | 79.4  | 77.6  | 67.4  | 130.2  | 0.925574258 | 86.85   | 88.65   | 1.8    | 0.979695431 | 0.93      | -1.019 |
| 94699_at   | 245.1 | 132.1 | 234.8 | 197.5 | 167   | 183.4 | 146.9 | 186.8  | 0.31625229  | 202.375 | 171.025 | 31.35  | 1.183306534 | 0.3743    | -1.156 |
| 94700_at   | 33.1  | 22.1  | 19.4  | 27.7  | 19.4  | 22.2  | 23.2  | 36.4   | 0.956791622 | 25.575  | 25.3    | 0.275  | 1.010869565 | 0.9163    | -1.02  |
| 94701_at   | 6.3   | 7.1   | 14.9  | 37    | 25.3  | 34.9  | 13.8  | 8.9    | 0.651469019 | 16.325  | 20.725  | 4.4    | 0.787696019 | 0.499     | 1.443  |
| 94702_at   | 3.8   | 7     | 7.1   | 3.5   | 12.8  | 5.9   | 3.8   | 4      | 0.611726504 | 5.35    | 6.625   | 1.275  | 0.80754717  | 0.6869    | 1.154  |
| 94703_at   | 18.9  | 8.6   | 40.1  | 11.3  | 3.7   | 28.2  | 21    | 26.9   | 0.981101887 | 19.725  | 19.95   | 0.225  | 0.988721805 | 0.9305    | -1.055 |
| 94704_at   | 40.3  | 62    | 34.2  | 28.6  | 51.2  | 11.3  | 42.9  | 40.6   | 0.689441163 | 41.275  | 36.5    | 4.775  | 1.130821918 | 0.5856    | -1.248 |
| 94705_at   | 39.5  | 49    | 39    | 43.2  | 24.4  | 50.3  | 51.5  | 58.7   | 0.677415946 | 42.675  | 46.225  | 3.55   | 0.923201731 | 0.8781    | -1.033 |
| 94706_s_at | 304.6 | 323.2 | 249.4 | 402.4 | 320.1 | 378.4 | 337.1 | 400    | 0.337060231 | 319.9   | 358.9   | 39     | 0.891334634 | 0.3008    | 1.134  |
| 94707_s_at | 16    | 15.5  | 28.5  | 13    | 52.7  | 12.2  | 16    | 30.1   | 0.389392639 | 18.25   | 27.75   | 9.5    | 0.657657658 | 0.4418    | 1.356  |
| 94708_at   | 34.4  | 52    | 78.9  | 45.3  | 48.2  | 65    | 66.6  | 50     | 0.672912387 | 52.65   | 57.45   | 4.8    | 0.916449086 | 0.546     | 1.131  |
| 94709_at   | 96.8  | 85    | 111.2 | 90.5  | 61.8  | 100.7 | 83.1  | 126.4  | 0.855474179 | 95.875  | 93      | 2.875  | 1.030913978 | 0.7285    | -1.061 |
| 94710_g_at | 3.6   | 4.4   | 3.2   | 2.5   | 2.2   | 5.3   | 6.5   | 1.3    | 0.774995071 | 3.425   | 3.825   | 0.4    | 0.895424837 | 0.8897    | -1.059 |
| 94711_at   | 28.6  | 58.3  | 44.9  | 15    | 18.8  | 6.4   | 11.9  | 12.7   | 0.078665871 | 36.7    | 12.45   | 24.25  | 2.947791165 | 0.03224   | -2.796 |
| 94712_at   | 37.8  | 52.8  | 49    | 34.1  | 59.3  | 56    | 56.6  | 80.2   | 0.038357179 | 43.425  | 63.025  | 19.6   | 0.689012297 | 0.0309    | 1.457  |



|            |         |         |         |         |         |         |         |         |             |           |           |          |             |          |        |
|------------|---------|---------|---------|---------|---------|---------|---------|---------|-------------|-----------|-----------|----------|-------------|----------|--------|
| 94713_at   | 1798.4  | 2398.3  | 1499.4  | 1760.5  | 1651    | 1510.2  | 1873.5  | 1608.9  | 0.378125562 | 1864.15   | 1660.9    | 203.25   | 1.122373412 | 0.372    | -1.109 |
| 94714_at   | 5.4     | 16.7    | 6.8     | 20.8    | 14.5    | 9.8     | 7.6     | 4.7     | 0.481855667 | 12.425    | 9.15      | 3.275    | 1.357923497 | 0.5955   | -1.257 |
| 94715_at   | 31.8    | 11      | 24.1    | 15.7    | 34.3    | 14.4    | 28.4    | 7.6     | 0.947919506 | 20.65     | 21.175    | 0.525    | 0.975206612 | 0.8987   | -1.057 |
| 94716_f_at | 22.7    | 36.5    | 27.1    | 13.1    | 75.4    | 26.3    | 61.2    | 112.6   | 0.086574985 | 24.85     | 68.875    | 44.025   | 0.360798548 | 0.04299  | 2.613  |
| 94717_f_at | 23.8    | 17.6    | 27.6    | 26.8    | 34.3    | 19.8    | 28.9    | 25.8    | 0.425850416 | 23.95     | 27.2      | 3.25     | 0.880514706 | 0.4548   | 1.131  |
| 94718_at   | 2.6     | 2.2     | 2.9     | 3.9     | 2.4     | 2.1     | 4.4     | 2.8     | 0.969658005 | 2.9       | 2.925     | 0.025    | 0.991452991 | 0.9905   | -1.002 |
| 94719_at   | 7.8     | 5.8     | 9.9     | 10      | 5.3     | 3.1     | 7.1     | 4.7     | 0.043760685 | 8.375     | 5.05      | 3.325    | 1.658415842 | 0.04956  | -1.688 |
| 94720_at   | 94.5    | 68.6    | 108     | 90.5    | 110.9   | 123.7   | 89.6    | 90.9    | 0.292974803 | 90.4      | 103.775   | 13.375   | 0.871115394 | 0.2955   | 1.152  |
| 94721_at   | 3.6     | 17.2    | 30.6    | 5.5     | 8.5     | 18.3    | 31.9    | 15.3    | 0.610529103 | 14.225    | 18.5      | 4.275    | 0.768918919 | 0.4116   | 1.648  |
| 94722_f_at | 12.6    | 12.4    | 15.6    | 14.6    | 16.8    | 15.3    | 16.7    | 14.6    | 0.079308145 | 13.8      | 15.85     | 2.05     | 0.870662461 | 0.07414  | 1.152  |
| 94723_at   | 7       | 13.1    | 6.4     | 3.7     | 42      | 16      | 17.5    | 8.6     | 0.159191612 | 7.55      | 21.025    | 13.475   | 0.359096314 | 0.06217  | 2.605  |
| 94724_at   | 0.8     | 2.2     | 0.9     | 3.7     | 5.5     | 0.9     | 3.1     | 1.6     | 0.505198216 | 1.9       | 2.775     | 0.875    | 0.684684685 | 0.5582   | 1.398  |
| 94725_f_at | 177.8   | 186.3   | 197.4   | 163.6   | 187     | 126.4   | 172.9   | 225.5   | 0.886022396 | 181.275   | 177.95    | 3.325    | 1.018685024 | 0.7778   | -1.038 |
| 94726_at   | 4.8     | 7.2     | 10.3    | 9.4     | 10.2    | 7.5     | 11.5    | 8       | 0.41033024  | 7.925     | 9.3       | 1.375    | 0.852150538 | 0.3806   | 1.208  |
| 94727_f_at | 40.5    | 22.7    | 10.3    | 53.6    | 41.1    | 39.6    | 52.8    | 52.9    | 0.223277974 | 31.775    | 46.6      | 14.825   | 0.681866953 | 0.1914   | 1.731  |
| 94728_f_at | 67.4    | 76      | 122.7   | 53.8    | 41.6    | 64.8    | 78.4    | 29.7    | 0.209977364 | 79.975    | 53.625    | 26.35    | 1.491375291 | 0.1826   | -1.523 |
| 94729_r_at | 17.7    | 16.4    | 15      | 16.1    | 18.6    | 27.1    | 24.5    | 14.2    | 0.197126527 | 16.3      | 21.1      | 4.8      | 0.772511848 | 0.1749   | 1.258  |
| 94730_at   | 0.7     | 1.6     | 0.8     | 2.1     | 1.6     | 1.8     | 1.3     | 2.3     | 0.305454568 | 1.3       | 1.75      | 0.45     | 0.742857143 | 0.2268   | 1.505  |
| 94731_at   | 42.8    | 34.9    | 34.8    | 23.2    | 55.3    | 15.9    | 38.1    | 49.1    | 0.582880394 | 33.925    | 39.6      | 5.675    | 0.856691919 | 0.8099   | -1.081 |
| 94732_at   | 15.6    | 2.8     | 13.9    | 15.4    | 28.7    | 5.8     | 18.4    | 18.5    | 0.337001226 | 11.925    | 17.85     | 5.925    | 0.668067227 | 0.4368   | 1.567  |
| 94733_at   | 136.5   | 107.6   | 146.7   | 211.7   | 176.7   | 155.9   | 107.5   | 119.1   | 0.705818389 | 150.625   | 139.8     | 10.825   | 1.077432046 | 0.7348   | -1.067 |
| 94734_at   | 12      | 9.2     | 11      | 8.8     | 14.1    | 7.3     | 8.4     | 8.9     | 0.749304261 | 10.25     | 9.675     | 0.575    | 1.059431525 | 0.6179   | -1.088 |
| 94735_s_at | 82.8    | 65.2    | 76.3    | 86.1    | 90.7    | 12.4    | 125.1   | 136.5   | 0.663561235 | 77.6      | 91.175    | 13.575   | 0.851110502 | 0.7961   | -1.166 |
| 94736_at   | 90.6    | 129.8   | 105.1   | 96.8    | 84.8    | 122.2   | 94.8    | 69.2    | 0.399500128 | 105.575   | 92.75     | 12.825   | 1.138274933 | 0.3574   | -1.152 |
| 94737_at   | 16.2    | 15.7    | 18      | 18.5    | 56.9    | 24.2    | 21.2    | 72.2    | 0.123648211 | 17.1      | 43.625    | 26.525   | 0.391977077 | 0.04033  | 2.231  |
| 94738_s_at | 0.9     | 1.7     | 1.3     | 1.8     | 2.2     | 1.2     | 1.1     | 0.7     | 0.754847389 | 1.425     | 1.3       | 0.125    | 1.096153846 | 0.6454   | -1.153 |
| 94739_at   | 46      | 62.2    | 68.9    | 56.4    | 33.2    | 80.3    | 62.4    | 64.3    | 0.885136658 | 58.375    | 60.05     | 1.675    | 0.972106578 | 0.9666   | -1.009 |
| 94740_g_at | 8.8     | 4.9     | 7.1     | 21.9    | 35.7    | 12.2    | 3.3     | 17.8    | 0.441796943 | 10.675    | 17.25     | 6.575    | 0.61884058  | 0.5992   | 1.39   |
| 94741_at   | 5       | 6.4     | 10      | 5.4     | 16.8    | 10.3    | 14.6    | 4.6     | 0.169531314 | 6.7       | 11.575    | 4.875    | 0.578833693 | 0.199    | 1.609  |
| 94743_f_at | 123.5   | 89.1    | 110.2   | 114.6   | 175.6   | 116.4   | 114.3   | 173.8   | 0.127099268 | 109.35    | 145.025   | 35.675   | 0.75400793  | 0.1015   | 1.307  |
| 94744_at   | 88.3    | 108.8   | 49.7    | 73.9    | 126.8   | 87.6    | 74.1    | 65      | 0.672278269 | 80.175    | 88.375    | 8.2      | 0.907213579 | 0.6537   | 1.11   |
| 94745_f_at | 62.4    | 51.7    | 70.1    | 91      | 87.9    | 62.6    | 75.2    | 61.2    | 0.788492808 | 68.8      | 71.725    | 2.925    | 0.95921924  | 0.7347   | -1.053 |
| 94746_at   | 6.7     | 5.5     | 11.1    | 28.1    | 12      | 13.2    | 8.7     | 37.4    | 0.576938986 | 12.85     | 17.825    | 4.975    | 0.720897616 | 0.4717   | 1.448  |
| 94747_at   | 13.7    | 14.7    | 9.9     | 14.6    | 20      | 13.7    | 26.2    | 16.2    | 0.120168789 | 13.225    | 19.025    | 5.8      | 0.695137976 | 0.08684  | 1.411  |
| 94748_g_at | 125.7   | 106.2   | 80.3    | 157.2   | 146.2   | 170.7   | 102.4   | 143.4   | 0.320837634 | 117.35    | 140.675   | 23.325   | 0.834192287 | 0.3167   | 1.215  |
| 94749_f_at | 38.6    | 51.6    | 40.3    | 55.4    | 52      | 38.3    | 65.9    | 57.4    | 0.372004157 | 46.475    | 53.4      | 6.925    | 0.870318352 | 0.3998   | 1.141  |
| 94750_at   | 2965.2  | 2443.8  | 2903.1  | 1908.1  | 1906.1  | 3390.7  | 2044.7  | 2235.1  | 0.714975303 | 2555.05   | 2394.15   | 160.9    | 1.06720548  | 0.6574   | -1.08  |
| 94752_s_at | 111.9   | 44.6    | 18.1    | 46.8    | 13.7    | 20      | 27.9    | 23.1    | 0.184818752 | 55.35     | 21.175    | 34.175   | 2.613931523 | 0.09507  | -2.213 |
| 94753_at   | 33.9    | 23.5    | 19.5    | 32      | 54.5    | 49.9    | 39.8    | 57.5    | 0.004310788 | 27.225    | 50.425    | 23.2     | 0.539910759 | 0.006208 | 1.881  |
| 94754_at   | 6.6     | 68.1    | 7.2     | 30.1    | 18.6    | 17.2    | 30.4    | 11.9    | 0.605978275 | 28        | 19.525    | 8.475    | 1.434058899 | 0.9467   | -1.043 |
| 94755_at   | 23.6    | 21.4    | 3.8     | 9.7     | 29.8    | 42.6    | 26.9    | 24.7    | 0.039328641 | 14.625    | 31        | 16.375   | 0.471774194 | 0.07293  | 2.592  |
| 94756_at   | 2.6     | 6.3     | 3.3     | 2.4     | 6.3     | 4.4     | 5       | 4.6     | 0.222852734 | 3.65      | 5.075     | 1.425    | 0.719211823 | 0.1365   | 1.481  |
| 94757_at   | 136.5   | 140.8   | 148     | 106.4   | 161.5   | 178.4   | 169.8   | 160.2   | 0.024446472 | 132.925   | 167.475   | 34.55    | 0.793700552 | 0.02205  | 1.269  |
| 94758_s_at | 12      | 2.1     | 13      | 9.4     | 10.2    | 4.8     | 3       | 14.1    | 0.766235811 | 9.125     | 8.025     | 1.1      | 1.137071651 | 0.8688   | -1.101 |
| 94759_at   | 21      | 44.7    | 30.6    | 17.5    | 29      | 18.8    | 48      | 57.7    | 0.394932856 | 28.45     | 38.375    | 9.925    | 0.741368078 | 0.4348   | 1.316  |
| 94760_at   | 5.4     | 4.7     | 3.7     | 4.9     | 4.8     | 5.8     | 5.7     | 8.9     | 0.168361317 | 4.675     | 6.3       | 1.625    | 0.742063492 | 0.1166   | 1.325  |
| 94761_at   | 4.4     | 5.1     | 3.2     | 6.1     | 19.7    | 3.4     | 6.6     | 2.4     | 0.468328593 | 4.7       | 8.025     | 3.325    | 0.585669782 | 0.6636   | 1.247  |
| 94762_at   | 69.4    | 108.8   | 53.4    | 61.4    | 43      | 49.4    | 56.2    | 101.5   | 0.574975461 | 73.25     | 62.525    | 10.725   | 1.171531387 | 0.49     | -1.196 |
| 94763_at   | 34.6    | 7.1     | 9.5     | 4.6     | 7.3     | 7.7     | 8.2     | 23.5    | 0.788023065 | 13.95     | 11.675    | 2.275    | 1.194860814 | 0.9995   | -1     |
| 94764_at   | 57      | 62      | 44.9    | 69.5    | 23.3    | 80.8    | 48.9    | 101.6   | 0.785223513 | 58.35     | 63.65     | 5.3      | 0.916732129 | 0.9079   | -1.042 |
| 94765_at   | 74.5    | 107.8   | 189.7   | 197.7   | 158.5   | 112.6   | 172.7   | 241.9   | 0.501449515 | 142.425   | 171.425   | 29       | 0.830829809 | 0.4536   | 1.254  |
| 94766_at   | 23492   | 24797   | 24257.2 | 19722.3 | 41757.2 | 20395.2 | 27889.9 | 22150.9 | 0.383762072 | 23067.125 | 28048.3   | 4981.175 | 0.82240724  | 0.3828   | 1.172  |
| 94767_at   | 18210.1 | 20732.6 | 19042.1 | 15451.3 | 35517.5 | 15960.2 | 21920.8 | 17601.2 | 0.400641903 | 18359.025 | 22749.925 | 4390.9   | 0.80699277  | 0.4037   | 1.185  |
| 94768_at   | 4270.1  | 5225.7  | 4205.1  | 4417.6  | 3204.3  | 4000.2  | 3331    | 3673    | 0.018262167 | 4529.625  | 3552.125  | 977.5    | 1.275187388 | 0.01384  | -1.275 |
| 94769_at   | 11.9    | 16      | 12.1    | 9.4     | 16.8    | 11.3    | 13.6    | 18.8    | 0.246401197 | 12.35     | 15.125    | 2.775    | 0.816528926 | 0.2439   | 1.224  |
| 94770_at   | 230.2   | 326.9   | 245.3   | 228.2   | 201.1   | 273.7   | 298.7   | 201.2   | 0.69786271  | 257.65    | 243.675   | 13.975   | 1.05735098  | 0.6665   | -1.062 |



|            |         |         |         |         |         |         |         |         |             |           |          |          |             |          |        |
|------------|---------|---------|---------|---------|---------|---------|---------|---------|-------------|-----------|----------|----------|-------------|----------|--------|
| 94771_at   | 206.2   | 210.3   | 153     | 199.4   | 250.6   | 296.7   | 200.2   | 250.1   | 0.058661479 | 192.225   | 249.4    | 57.175   | 0.7707498   | 0.05637  | 1.295  |
| 94772_at   | 54.7    | 27.9    | 46      | 37.4    | 12.4    | 26.9    | 9.7     | 10.3    | 0.011051846 | 41.5      | 14.825   | 26.675   | 2.799325464 | 0.00747  | -2.979 |
| 94773_at   | 2.9     | 3.6     | 5.5     | 5.6     | 4.7     | 7.4     | 3.8     | 3       | 0.792102538 | 4.4       | 4.725    | 0.325    | 0.931216931 | 0.8561   | -1.049 |
| 94774_at   | 1.2     | 5.8     | 3.4     | 0.9     | 0.8     | 1.2     | 2.7     | 1.3     | 0.338500157 | 2.825     | 1.5      | 1.325    | 1.883333333 | 0.4078   | -1.557 |
| 94775_at   | 311     | 300.3   | 411.5   | 371.1   | 358.3   | 293.3   | 289.4   | 333.8   | 0.379858691 | 348.475   | 318.7    | 29.775   | 1.09342642  | 0.384    | -1.089 |
| 94776_f_at | 9.4     | 2.9     | 4.7     | 5.7     | 7.7     | 4       | 9       | 3.1     | 0.893833775 | 5.675     | 5.95     | 0.275    | 0.953781513 | 0.9076   | -1.044 |
| 94777_at   | 46.1    | 36.3    | 43.5    | 55.2    | 52.5    | 53.3    | 33.2    | 60.9    | 0.534932545 | 45.275    | 49.975   | 4.7      | 0.905952976 | 0.6128   | -1.088 |
| 94778_at   | 174.2   | 93.5    | 125.6   | 262     | 182.7   | 294     | 319.2   | 229     | 0.10411714  | 163.825   | 256.225  | 92.4     | 0.639379452 | 0.09869  | 1.645  |
| 94779_f_at | 8       | 3.4     | 7.1     | 7.3     | 12.7    | 8       | 8.8     | 8.7     | 0.081902441 | 6.45      | 9.55     | 3.1      | 0.67539267  | 0.1069   | 1.534  |
| 94780_at   | 307.7   | 337.1   | 207.3   | 416     | 326     | 343.5   | 312.4   | 245.7   | 0.842812416 | 317.025   | 306.9    | 10.125   | 1.032991202 | 0.9534   | -1.01  |
| 94781_at   | 14602.9 | 12549.2 | 12795   | 8572.9  | 17335.7 | 10160.9 | 13497   | 16513.4 | 0.321063264 | 12130     | 14376.75 | 2246.75  | 0.843723373 | 0.3548   | 1.182  |
| 94782_at   | 8.9     | 1.7     | 6.4     | 6.9     | 3.8     | 3.5     | 7.3     | 1.4     | 0.352843755 | 5.975     | 4        | 1.975    | 1.49375     | 0.472    | -1.478 |
| 94783_at   | 4.9     | 9.7     | 6.3     | 7.1     | 6.5     | 6.3     | 10.3    | 6.3     | 0.812136181 | 7         | 7.35     | 0.35     | 0.952380952 | 0.7655   | -1.06  |
| 94784_at   | 514.5   | 474.3   | 517.9   | 458.3   | 342.5   | 528.3   | 430.4   | 433.3   | 0.231884583 | 491.25    | 433.625  | 57.625   | 1.132891323 | 0.1994   | -1.145 |
| 94785_at   | 8.4     | 20.8    | 27.4    | 33.6    | 10      | 21.1    | 39.6    | 9       | 0.779205836 | 22.55     | 19.925   | 2.625    | 1.13174404  | 0.6959   | -1.209 |
| 94786_at   | 24.2    | 53      | 50.6    | 62.1    | 8.4     | 65      | 79.6    | 83.9    | 0.572303085 | 47.475    | 59.225   | 11.75    | 0.801604052 | 0.9679   | -1.025 |
| 94787_at   | 110     | 110     | 80.4    | 112.9   | 164.1   | 139     | 146.6   | 143     | 0.004097108 | 103.325   | 148.175  | 44.85    | 0.697317361 | 0.005989 | 1.445  |
| 94788_f_at | 12384.4 | 12871.8 | 11137.4 | 11110.7 | 12745.1 | 9321.4  | 10145.6 | 10076.9 | 0.195762501 | 11876.075 | 10572.25 | 1303.825 | 1.123325215 | 0.1669   | -1.129 |
| 94789_r_at | 14365.2 | 14223.2 | 14746.6 | 13971.4 | 16983.5 | 11224.6 | 14796.9 | 14371.4 | 0.9892303   | 14326.6   | 14344.1  | 17.5     | 0.998779986 | 0.917    | -1.009 |
| 94790_at   | 114.6   | 95.3    | 148.8   | 133.2   | 92.7    | 93.2    | 84.3    | 150.5   | 0.390762805 | 122.975   | 105.175  | 17.8     | 1.16924174  | 0.3359   | -1.185 |
| 94791_s_at | 264.9   | 260     | 349.2   | 309.2   | 253.8   | 284.9   | 300.6   | 275.1   | 0.495474359 | 295.825   | 278.6    | 17.225   | 1.061826992 | 0.5113   | -1.056 |
| 94792_at   | 31.4    | 39      | 11.6    | 57.8    | 57.9    | 35.3    | 12.4    | 10.6    | 0.701951984 | 34.95     | 29.05    | 5.9      | 1.203098107 | 0.6203   | -1.322 |
| 94793_at   | 33.4    | 27.7    | 52.9    | 65      | 67.6    | 37.7    | 10.1    | 66.7    | 0.96366648  | 44.75     | 45.525   | 0.775    | 0.982976387 | 0.7627   | -1.167 |
| 94794_at   | 5766.3  | 6887    | 5212.6  | 5656.9  | 6461    | 5990.1  | 6399.5  | 5238.3  | 0.766304267 | 5880.7    | 6022.225 | 141.525  | 0.97649955  | 0.7477   | -1.026 |
| 94795_at   | 9.7     | 40.6    | 13      | 40.1    | 39.4    | 35.8    | 39.7    | 33.6    | 0.273051814 | 25.85     | 37.125   | 11.275   | 0.696296296 | 0.1914   | 1.741  |
| 94796_at   | 1145.1  | 1829.9  | 1192.6  | 1447    | 1283.5  | 1526    | 1487.9  | 1393    | 0.914959856 | 1403.65   | 1422.6   | 18.95    | 0.98667932  | 0.8084   | -1.029 |
| 94797_at   | 7.9     | 5.8     | 9.7     | 14      | 11.5    | 6.6     | 10.1    | 7       | 0.804323831 | 9.35      | 8.8      | 0.55     | 1.0625      | 0.8695   | -1.04  |
| 94798_at   | 6.1     | 3.1     | 8.9     | 4.2     | 3.2     | 2.1     | 3.5     | 3.6     | 0.144652586 | 5.575     | 3.1      | 2.475    | 1.798387097 | 0.08921  | -1.701 |
| 94799_at   | 59.1    | 41.8    | 53.7    | 78.7    | 88.3    | 56      | 53.5    | 60.7    | 0.59165591  | 58.325    | 64.625   | 6.3      | 0.902514507 | 0.5573   | 1.114  |
| 94800_at   | 17.7    | 11.2    | 27.7    | 9.2     | 26.7    | 37.3    | 20.4    | 16.5    | 0.204645832 | 16.45     | 25.225   | 8.775    | 0.652130823 | 0.1695   | 1.604  |
| 94801_at   | 178.2   | 281.7   | 206     | 223.4   | 163     | 233.1   | 182.7   | 260     | 0.70033072  | 222.325   | 209.7    | 12.625   | 1.060205055 | 0.6832   | -1.064 |
| 94802_at   | 261.4   | 189.4   | 242.2   | 158.9   | 130.1   | 356.1   | 176.3   | 186.2   | 0.989013988 | 212.975   | 212.175  | 0.8      | 1.003770472 | 0.8231   | -1.058 |
| 94803_at   | 202     | 208.6   | 246.4   | 228     | 187.3   | 252.5   | 265.2   | 266.7   | 0.360040897 | 221.25    | 242.925  | 21.675   | 0.910774931 | 0.3999   | -1.09  |
| 94804_at   | 513.6   | 557.3   | 499.3   | 490.9   | 545.1   | 567.3   | 541.4   | 612.3   | 0.059027884 | 515.275   | 566.525  | 51.25    | 0.909536208 | 0.05488  | 1.099  |
| 94805_f_at | 22128.1 | 23118.1 | 22565.7 | 18613.6 | 41167.8 | 17768.2 | 23432.9 | 17732.5 | 0.584527395 | 21606.375 | 25025.35 | 3418.975 | 0.863379533 | 0.6861   | -1.091 |
| 94806_at   | 2846.7  | 2209.6  | 2386.4  | 2287.6  | 1577.7  | 2507.5  | 2131.6  | 2504.7  | 0.378300972 | 2432.575  | 2180.375 | 252.2    | 1.115668176 | 0.3605   | -1.129 |
| 94807_at   | 703     | 960.2   | 807     | 868.1   | 894.5   | 807.7   | 712.9   | 1127.1  | 0.644308083 | 834.575   | 885.55   | 50.975   | 0.942436904 | 0.6771   | -1.053 |
| 94809_at   | 83.7    | 64.7    | 53.3    | 71.9    | 45.6    | 118.5   | 74.8    | 122.9   | 0.32697368  | 68.4      | 90.45    | 22.05    | 0.756218905 | 0.4197   | 1.244  |
| 94810_at   | 2828.8  | 2889.2  | 3354.5  | 2584.6  | 3452.9  | 3047.5  | 3170.3  | 2795.7  | 0.375533489 | 2914.275  | 3116.6   | 202.325  | 0.935081499 | 0.3619   | -1.071 |
| 94811_s_at | 1997.8  | 2883.5  | 2635.7  | 2238.9  | 3227.4  | 2465    | 2734.5  | 2174    | 0.506639152 | 2438.975  | 2650.225 | 211.25   | 0.920289787 | 0.5074   | -1.086 |
| 94812_at   | 657.9   | 476.3   | 628.2   | 462.4   | 485     | 579.4   | 486.7   | 548.5   | 0.602885332 | 556.2     | 524.9    | 31.3     | 1.059630406 | 0.651    | -1.05  |
| 94813_at   | 991     | 1697.3  | 1177.5  | 1354.6  | 1414.8  | 1742.5  | 1373.9  | 1764.7  | 0.197831238 | 1305.1    | 1573.975 | 268.875  | 0.829174542 | 0.1795   | 1.222  |
| 94814_at   | 3803.3  | 4063.8  | 4486.3  | 3059.2  | 3321.9  | 3530.9  | 2739.2  | 3145.7  | 0.112664825 | 3853.15   | 3184.425 | 668.725  | 1.209998665 | 0.1062   | -1.204 |
| 94815_at   | 531     | 490.3   | 377.1   | 408.4   | 458.1   | 431.7   | 431.6   | 491.7   | 0.969243627 | 451.7     | 453.275  | 1.575    | 0.996525288 | 0.8978   | -1.011 |
| 94817_at   | 6728.7  | 7564.9  | 7001.7  | 5267.9  | 8727.8  | 7049.8  | 7528.1  | 6104.9  | 0.369386556 | 6640.8    | 7352.65  | 711.85   | 0.903184566 | 0.3787   | -1.108 |
| 94818_at   | 1108.9  | 865.4   | 815.5   | 980.2   | 703.8   | 1027.6  | 1036.6  | 1271.3  | 0.637002872 | 942.5     | 1009.825 | 67.325   | 0.933330032 | 0.7136   | -1.056 |
| 94819_f_at | 1565.9  | 2394.7  | 1762.7  | 1990.2  | 1695.9  | 2163.5  | 2222    | 1857.5  | 0.805242974 | 1928.375  | 1984.725 | 56.35    | 0.971608157 | 0.7622   | -1.036 |
| 94820_r_at | 188.7   | 280.3   | 269.1   | 349.4   | 256     | 297.5   | 405.5   | 244.8   | 0.576835195 | 271.875   | 300.95   | 29.075   | 0.903389267 | 0.5632   | -1.11  |
| 94821_at   | 1705    | 1307.2  | 1313.4  | 1494.6  | 1406.3  | 1433.6  | 1396.6  | 1426.3  | 0.704284365 | 1455.05   | 1415.7   | 39.35    | 1.027795437 | 0.7466   | -1.022 |
| 94822_at   | 9.2     | 20      | 26.1    | 9.7     | 12.3    | 12      | 30.8    | 12.6    | 0.916835647 | 16.25     | 16.925   | 0.675    | 0.960118168 | 0.8823   | -1.055 |
| 94823_at   | 17020.3 | 17154   | 18487.7 | 16035.5 | 29506.2 | 14852.3 | 20565.6 | 18180.9 | 0.335671254 | 17174.375 | 20776.25 | 3601.875 | 0.82663498  | 0.3198   | 1.173  |
| 94825_at   | 32.1    | 28.5    | 35.4    | 15.8    | 15.8    | 32.3    | 30      | 28.3    | 0.819542898 | 27.95     | 26.6     | 1.35     | 1.05075188  | 0.8724   | -1.042 |
| 94826_at   | 1160.2  | 1273.7  | 978.3   | 1118.6  | 980.6   | 1112.7  | 1003.4  | 1150.9  | 0.378749155 | 1132.7    | 1061.9   | 70.8     | 1.066672945 | 0.3886   | -1.064 |
| 94827_at   | 154.6   | 83.3    | 170.6   | 153.4   | 182     | 132.7   | 117.9   | 143.3   | 0.888424535 | 140.475   | 143.975  | 3.5      | 0.975690224 | 0.8076   | -1.049 |
| 94828_at   | 531.1   | 712.4   | 655.6   | 509     | 721.7   | 605     | 694.5   | 584.1   | 0.441662594 | 602.025   | 651.325  | 49.3     | 0.924308141 | 0.4128   | -1.088 |
| 94829_at   | 518.7   | 347.7   | 581.7   | 478.2   | 858.2   | 523.5   | 620.7   | 426.2   | 0.28989987  | 481.575   | 607.15   | 125.575  | 0.793173021 | 0.2872   | 1.241  |



|            |        |        |        |        |        |        |        |        |             |          |          |         |             |           |        |
|------------|--------|--------|--------|--------|--------|--------|--------|--------|-------------|----------|----------|---------|-------------|-----------|--------|
| 94830_at   | 549.7  | 721    | 602.2  | 686.1  | 564.8  | 625.4  | 470.1  | 656.9  | 0.327316383 | 639.75   | 579.3    | 60.45   | 1.104350078 | 0.3321    | -1.107 |
| 94831_at   | 3730.2 | 3228.5 | 3617   | 3471.9 | 3273   | 3609.4 | 3598.7 | 3284.5 | 0.640644999 | 3511.9   | 3441.4   | 70.5    | 1.020485849 | 0.6475    | -1.02  |
| 94832_at   | 402    | 367.7  | 375.6  | 392.2  | 268.3  | 299.8  | 328    | 331.9  | 0.007120717 | 384.375  | 307      | 77.375  | 1.252035831 | 0.005241  | -1.256 |
| 94833_at   | 2282.6 | 2026   | 1960.1 | 2071.1 | 1760   | 2554.6 | 1844.7 | 1994.9 | 0.821103105 | 2084.95  | 2038.55  | 46.4    | 1.022761276 | 0.735     | -1.032 |
| 94834_at   | 509.6  | 609.6  | 679.8  | 603.4  | 1265.3 | 824.6  | 905.2  | 820.8  | 0.038229138 | 600.6    | 953.975  | 353.375 | 0.629576247 | 0.008781  | 1.57   |
| 94835_f_at | 2407.9 | 2368.7 | 2437.7 | 2100.9 | 2953.1 | 2452.1 | 2494.9 | 2066.1 | 0.455282973 | 2328.8   | 2491.55  | 162.75  | 0.934679216 | 0.476     | -1.063 |
| 94836_at   | 47.2   | 13.5   | 24.1   | 22.9   | 21.8   | 37.8   | 69     | 19.2   | 0.490984574 | 26.925   | 36.95    | 10.025  | 0.728687415 | 0.4962    | 1.325  |
| 94837_at   | 6459.2 | 5301.8 | 5528.5 | 5555.6 | 5398.6 | 5692.1 | 5484.8 | 5969   | 0.804254166 | 5711.275 | 5636.125 | 75.15   | 1.013333629 | 0.8266    | -1.011 |
| 94838_r_at | 3.8    | 9.8    | 15.1   | 15.3   | 1.1    | 6      | 4.2    | 15.3   | 0.328858075 | 11       | 6.65     | 4.35    | 1.654135338 | 0.2842    | -2.106 |
| 94839_at   | 550.3  | 1034.7 | 867.6  | 925    | 962.1  | 1198.1 | 1160.7 | 1111.9 | 0.079560759 | 844.4    | 1108.2   | 263.8   | 0.761956326 | 0.09141   | 1.343  |
| 94840_at   | 733    | 835.8  | 763.9  | 959.6  | 864.7  | 866.6  | 981.7  | 1093   | 0.134581751 | 823.075  | 951.5    | 128.425 | 0.865028902 | 0.1262    | 1.157  |
| 94841_at   | 3299.4 | 2456.9 | 2957.6 | 2668.1 | 2711.1 | 2591.9 | 2541.2 | 2686.2 | 0.331330655 | 2845.5   | 2632.6   | 212.9   | 1.080870622 | 0.3148    | -1.075 |
| 94842_at   | 2113.5 | 1931.6 | 2394.5 | 2194   | 1773   | 2193.6 | 2132.3 | 1967.1 | 0.331933874 | 2158.4   | 2016.5   | 141.9   | 1.070369452 | 0.3349    | -1.071 |
| 94843_at   | 214.2  | 231    | 226    | 225    | 333.1  | 266.6  | 310.2  | 269.8  | 0.019302032 | 224.05   | 294.925  | 70.875  | 0.759684666 | 0.003046  | 1.311  |
| 94844_at   | 29.2   | 27.8   | 33.2   | 43.3   | 53.9   | 31.5   | 42.4   | 34.3   | 0.292118452 | 33.375   | 40.525   | 7.15    | 0.8235657   | 0.277     | 1.205  |
| 94845_at   | 2029.6 | 1975.2 | 1922.5 | 2329.5 | 1683.6 | 1914.2 | 1717.4 | 2437.6 | 0.552315999 | 2064.2   | 1938.2   | 126     | 1.065008771 | 0.4809    | -1.074 |
| 94848_at   | 29.3   | 13.4   | 50.6   | 46.5   | 35.7   | 27.7   | 4.4    | 39.8   | 0.515139516 | 34.95    | 26.9     | 8.05    | 1.299256506 | 0.5129    | -1.516 |
| 94849_at   | 2.6    | 11.2   | 13.4   | 20.4   | 10.5   | 5.6    | 17.1   | 7.1    | 0.698948449 | 11.9     | 10.075   | 1.825   | 1.181141439 | 0.9502    | -1.034 |
| 94850_at   | 888.4  | 782.4  | 847.7  | 872.8  | 659.1  | 846.9  | 867.7  | 948.2  | 0.804557096 | 847.825  | 830.475  | 17.35   | 1.020891658 | 0.7444    | -1.029 |
| 94852_at   | 375.9  | 318.9  | 259.4  | 278.6  | 314.3  | 378.1  | 323.3  | 334.7  | 0.365959859 | 308.2    | 337.6    | 29.4    | 0.912914692 | 0.3211    | -1.104 |
| 94853_at   | 549    | 849.2  | 691.9  | 848.2  | 909.4  | 770.2  | 801.8  | 735.1  | 0.435232995 | 734.575  | 804.125  | 69.55   | 0.913508472 | 0.3992    | 1.108  |
| 94854_g_at | 654.8  | 1292.1 | 812.3  | 996.2  | 1047.1 | 951.2  | 1012.5 | 1001.7 | 0.67255958  | 938.85   | 1003.125 | 64.275  | 0.935925234 | 0.5312    | -1.102 |
| 94855_at   | 563.9  | 501.4  | 558.6  | 570.5  | 607.1  | 452.5  | 575.7  | 517.1  | 0.793233489 | 548.6    | 538.1    | 10.5    | 1.019513102 | 0.7452    | -1.025 |
| 94856_r_at | 19     | 31.3   | 16.8   | 37.4   | 49.8   | 31.1   | 37.5   | 14     | 0.469180248 | 26.125   | 33.1     | 6.975   | 0.789274924 | 0.5815    | 1.214  |
| 94857_at   | 473.6  | 519.4  | 450.5  | 494.3  | 456.2  | 446.7  | 409.8  | 522.6  | 0.397241201 | 484.45   | 458.825  | 25.625  | 1.05584918  | 0.3711    | -1.058 |
| 94860_at   | 2013.4 | 1517.5 | 1969.9 | 1622.7 | 1921.3 | 1679.6 | 1991.6 | 1702   | 0.781986738 | 1780.875 | 1823.625 | 42.75   | 0.97655768  | 0.7425    | -1.029 |
| 94861_at   | 352.9  | 305.4  | 240.9  | 288.2  | 148.2  | 307.9  | 317.5  | 230.1  | 0.362643713 | 296.85   | 250.925  | 45.925  | 1.183022816 | 0.3364    | -1.224 |
| 94862_i_at | 2608.5 | 2178.2 | 2313.1 | 1812.4 | 2487.2 | 1979.9 | 2187.5 | 2246.3 | 0.989013845 | 2228.05  | 2225.225 | 2.825   | 1.001269535 | 0.9664    | -1.004 |
| 94863_r_at | 669.9  | 389.9  | 629.8  | 426.6  | 545.2  | 366.8  | 564.5  | 369.6  | 0.478260217 | 529.05   | 461.525  | 67.525  | 1.146308434 | 0.4983    | -1.139 |
| 94865_at   | 842.3  | 783.7  | 914.3  | 863.2  | 629.8  | 741.2  | 663    | 770.2  | 0.013208118 | 850.875  | 701.05   | 149.825 | 1.213715142 | 0.01381   | -1.216 |
| 94866_at   | 25.3   | 82.4   | 100.8  | 83.1   | 143.6  | 88.7   | 80.7   | 93.5   | 0.235467113 | 72.9     | 101.625  | 28.725  | 0.717343173 | 0.2578    | 1.531  |
| 94868_at   | 2318.6 | 1904.3 | 2297   | 2085.8 | 2175.9 | 2040.5 | 2200.4 | 1680.7 | 0.443852255 | 2151.425 | 2024.375 | 127.05  | 1.062760111 | 0.4458    | -1.065 |
| 94869_at   | 200.8  | 235.7  | 209.4  | 263.8  | 204.2  | 195.8  | 221.2  | 215.4  | 0.299566002 | 227.425  | 209.15   | 18.275  | 1.08737748  | 0.2842    | -1.082 |
| 94870_f_at | 958.9  | 583.8  | 884.8  | 579.6  | 786.7  | 741.8  | 798.6  | 485.7  | 0.709024434 | 751.775  | 703.2    | 48.575  | 1.069077076 | 0.7502    | -1.061 |
| 94871_r_at | 869.7  | 727.6  | 794.8  | 1101.3 | 766.7  | 808.1  | 801.5  | 835    | 0.452438854 | 873.35   | 802.825  | 70.525  | 1.087846044 | 0.4559    | -1.075 |
| 94872_at   | 534.5  | 431.1  | 479.5  | 496    | 495.4  | 597.7  | 527.4  | 651.5  | 0.100767267 | 485.275  | 568      | 82.725  | 0.854357394 | 0.08833   | 1.167  |
| 94874_at   | 5.3    | 8.3    | 38     | 17.1   | 39.8   | 21.3   | 7.5    | 6.8    | 0.880687848 | 17.175   | 18.85    | 1.675   | 0.911140584 | 0.8737    | 1.106  |
| 94875_at   | 925    | 816.2  | 898.1  | 789.8  | 1231.6 | 750.4  | 882.5  | 746.7  | 0.723240197 | 857.275  | 902.8    | 45.525  | 0.949573549 | 0.803     | -1.033 |
| 94876_f_at | 2351.2 | 2486.8 | 2122.2 | 1989.8 | 2231.6 | 2536.1 | 2520.4 | 2095.2 | 0.513591722 | 2237.5   | 2345.825 | 108.325 | 0.953822216 | 0.513     | -1.049 |
| 94877_at   | 68.8   | 72.1   | 92.3   | 85.4   | 127.2  | 72.8   | 76.2   | 95     | 0.387783864 | 79.65    | 92.8     | 13.15   | 0.858297414 | 0.3903    | 1.144  |
| 94878_at   | 1398   | 1328.1 | 1455.9 | 1714.4 | 1529.2 | 1368.2 | 1554.4 | 1558.2 | 0.779417594 | 1474.1   | 1502.5   | 28.4    | 0.98109817  | 0.7364    | -1.023 |
| 94881_at   | 93.5   | 54     | 22     | 73.8   | 78.3   | 82.1   | 90.2   | 130.4  | 0.128929988 | 60.825   | 95.25    | 34.425  | 0.638582677 | 0.1506    | 1.743  |
| 94882_at   | 565.7  | 622.9  | 597.9  | 824.5  | 555.8  | 596.8  | 590.2  | 746    | 0.687942306 | 652.75   | 622.2    | 30.55   | 1.049099968 | 0.6959    | -1.044 |
| 94885_at   | 875.6  | 916    | 885.8  | 859.1  | 701.3  | 904.5  | 827.8  | 832.2  | 0.2082732   | 884.125  | 816.45   | 67.675  | 1.082889338 | 0.1796    | -1.087 |
| 94886_at   | 361.6  | 313.3  | 300.8  | 332.4  | 253.6  | 258.5  | 308.2  | 388.3  | 0.503827375 | 327.025  | 302.15   | 24.875  | 1.082326659 | 0.4226    | -1.096 |
| 94889_at   | 5172.4 | 5386.5 | 5294.7 | 5340.2 | 4214.8 | 3921.6 | 4140.7 | 4405.1 | 0.000388034 | 5298.45  | 4170.55  | 1127.9  | 1.270443946 | 0.0000831 | -1.271 |
| 94890_at   | 41     | 24.6   | 22.6   | 28.9   | 38     | 35.3   | 10     | 11.5   | 0.545669175 | 29.275   | 23.7     | 5.575   | 1.235232068 | 0.3757    | -1.438 |
| 94891_s_at | 838.5  | 1204.9 | 1085.7 | 829.1  | 1903   | 1043   | 1423.9 | 683    | 0.383396644 | 989.55   | 1263.225 | 273.675 | 0.783352134 | 0.4605    | 1.207  |
| 94892_r_at | 2118.4 | 2250.3 | 2128.3 | 1790.9 | 3110.4 | 2169.2 | 2529.7 | 2183.2 | 0.149706455 | 2071.975 | 2498.125 | 426.15  | 0.829412059 | 0.1163    | 1.197  |
| 94893_at   | 473.4  | 463.9  | 573.4  | 553.2  | 465.6  | 471.6  | 387.3  | 646.5  | 0.722373689 | 515.975  | 492.75   | 23.225  | 1.047133435 | 0.637     | -1.061 |
| 94895_at   | 788    | 773    | 660.4  | 733.1  | 798.4  | 653.5  | 677.1  | 790.8  | 0.860816794 | 738.625  | 729.95   | 8.675   | 1.011884376 | 0.8422    | -1.014 |
| 94896_at   | 441.7  | 845.1  | 788.5  | 619.4  | 754.8  | 578.2  | 667.3  | 672.4  | 0.957932722 | 673.675  | 668.175  | 5.5     | 1.008231377 | 0.9126    | -1.018 |
| 94897_at   | 989.9  | 1017.2 | 1058.1 | 957.3  | 1470.6 | 1112.5 | 1315.2 | 945.8  | 0.170979949 | 1005.625 | 1211.025 | 205.4   | 0.83039161  | 0.1315    | 1.188  |
| 94898_at   | 1010.7 | 813.9  | 900.3  | 851.7  | 648.4  | 799    | 829.7  | 832.8  | 0.10472591  | 894.15   | 777.475  | 116.675 | 1.150069134 | 0.1106    | -1.152 |
| 94899_at   | 3183.9 | 5054.1 | 4436   | 4005.2 | 3520   | 4223.1 | 4116.2 | 4562.3 | 0.891884074 | 4169.8   | 4105.4   | 64.4    | 1.015686657 | 0.959     | -1.006 |
| 94900_at   | 171.7  | 222.1  | 244.9  | 214.6  | 279.5  | 173.3  | 220.3  | 343.9  | 0.36396769  | 213.325  | 254.25   | 40.925  | 0.839036382 | 0.3972    | 1.163  |



|            |        |        |        |        |        |        |        |        |             |          |          |          |             |          |        |
|------------|--------|--------|--------|--------|--------|--------|--------|--------|-------------|----------|----------|----------|-------------|----------|--------|
| 94902_at   | 680.3  | 710.4  | 530.2  | 664.5  | 606.3  | 979.4  | 833.9  | 699.7  | 0.208619268 | 646.35   | 779.825  | 133.475  | 0.828839804 | 0.1993   | 1.194  |
| 94903_at   | 1950.9 | 2270.3 | 2068.3 | 2259.1 | 1910.9 | 2175.2 | 1811.8 | 2048.1 | 0.22331988  | 2137.15  | 1986.5   | 150.65   | 1.075836899 | 0.2238   | -1.076 |
| 94906_at   | 1850.2 | 1186.2 | 1822.3 | 1559.1 | 2149.5 | 1805.4 | 2278.4 | 2328.5 | 0.035066159 | 1604.45  | 2140.45  | 536      | 0.749585368 | 0.04483  | 1.348  |
| 94907_f_at | 3068.5 | 2873.4 | 2954.2 | 2714.6 | 4835.7 | 2646.5 | 2899.9 | 3269.3 | 0.377025597 | 2902.675 | 3412.85  | 510.175  | 0.8505135   | 0.3566   | 1.144  |
| 94908_r_at | 857.2  | 975.7  | 694.4  | 689.5  | 1246.2 | 815.6  | 975.8  | 805.4  | 0.259717021 | 804.2    | 960.75   | 156.55   | 0.837054385 | 0.2407   | 1.188  |
| 94909_at   | 2056.9 | 2318.8 | 2052.6 | 2333.4 | 3082.4 | 1855.1 | 2335.3 | 2134.2 | 0.591782484 | 2190.425 | 2351.75  | 161.325  | 0.931402147 | 0.6419   | -1.057 |
| 94910_at   | 963.4  | 1009.2 | 1059.5 | 925.4  | 849.4  | 872.8  | 869.9  | 807.7  | 0.009997471 | 989.375  | 849.95   | 139.425  | 1.164039061 | 0.004529 | -1.163 |
| 94912_at   | 2583.6 | 1872.3 | 1961.5 | 2016.1 | 2829.5 | 1765   | 1896.4 | 1787.3 | 0.902525831 | 2108.375 | 2069.55  | 38.825   | 1.018760117 | 0.8259   | -1.031 |
| 94913_at   | 1525   | 1210.4 | 1504.7 | 1550.8 | 1016.2 | 1211.1 | 1151.2 | 1134.2 | 0.019372523 | 1447.725 | 1128.175 | 319.55   | 1.283245064 | 0.01181  | -1.28  |
| 94914_at   | 73.6   | 22.3   | 63.1   | 76.2   | 24.7   | 20.4   | 22     | 58.6   | 0.131546436 | 58.8     | 31.425   | 27.375   | 1.871121718 | 0.1516   | -1.869 |
| 94915_at   | 4309.6 | 3985   | 3863.4 | 4718.3 | 6553   | 3986.8 | 5249.7 | 4351.3 | 0.253021739 | 4219.075 | 5035.2   | 816.125  | 0.837916071 | 0.2236   | 1.175  |
| 94916_at   | 323.7  | 228.9  | 252.6  | 285.7  | 198.7  | 265.4  | 284.6  | 300    | 0.740209907 | 272.725  | 262.175  | 10.55    | 1.040240298 | 0.73     | -1.044 |
| 94917_at   | 144.2  | 96.1   | 130.2  | 116.3  | 95.6   | 247.7  | 111.9  | 68.8   | 0.834331017 | 121.7    | 131      | 9.3      | 0.929007634 | 0.9059   | -1.036 |
| 94918_at   | 667.6  | 585.2  | 573.5  | 520.6  | 691.1  | 593    | 676.9  | 581.1  | 0.284344238 | 586.725  | 635.525  | 48.8     | 0.923213092 | 0.278    | -1.084 |
| 94920_at   | 227.4  | 216.5  | 251.5  | 274.6  | 247.7  | 214.7  | 240.6  | 246.1  | 0.743152508 | 242.5    | 237.275  | 5.225    | 1.022020862 | 0.7693   | -1.019 |
| 94921_i_at | 0.3    | 4.7    | 0.5    | 0.9    | 0.8    | 6.9    | 0.4    | 1      | 0.73141083  | 1.6      | 2.275    | 0.675    | 0.703296703 | 0.7359   | 1.352  |
| 94922_i_at | 137.1  | 134.5  | 66.9   | 162.5  | 52     | 137.4  | 82.4   | 76.5   | 0.211619357 | 125.25   | 87.075   | 38.175   | 1.438415159 | 0.231    | -1.453 |
| 94923_f_at | 2532.8 | 3537.4 | 1877.4 | 3754.6 | 3239.3 | 2064.4 | 4165.3 | 3577.7 | 0.609225366 | 2925.55  | 3261.675 | 336.125  | 0.896947121 | 0.6238   | -1.121 |
| 94924_at   | 1287.7 | 1301.8 | 1279.6 | 987.5  | 1360.3 | 866    | 1002.4 | 1042.5 | 0.3041442   | 1214.15  | 1067.8   | 146.35   | 1.137057501 | 0.2842   | -1.145 |
| 94925_at   | 989.5  | 899    | 749.6  | 954.3  | 716.9  | 811.2  | 580.4  | 744.2  | 0.042205217 | 898.1    | 713.175  | 184.925  | 1.259298209 | 0.04846  | -1.262 |
| 94927_at   | 2.2    | 2.5    | 1.4    | 2.3    | 2      | 2.3    | 1.8    | 3.4    | 0.549982093 | 2.1      | 2.375    | 0.275    | 0.884210526 | 0.5974   | -1.109 |
| 94928_at   | 94.3   | 74.4   | 104    | 90.9   | 98.8   | 107.1  | 92.8   | 94.3   | 0.343364487 | 90.9     | 98.25    | 7.35     | 0.92519084  | 0.3198   | -1.087 |
| 94929_at   | 563.2  | 1215   | 680.6  | 1012.6 | 805    | 816.9  | 963.4  | 860.8  | 0.969586175 | 867.85   | 861.525  | 6.325    | 1.007341633 | 0.848    | -1.037 |
| 94930_at   | 848    | 888.5  | 728.3  | 864.5  | 592.5  | 923.4  | 772.7  | 1006   | 0.933600857 | 832.325  | 823.65   | 8.675    | 1.010532386 | 0.8342   | -1.028 |
| 94931_at   | 643.9  | 626.9  | 643.8  | 500.3  | 758.6  | 604.4  | 516.2  | 455.4  | 0.799201243 | 603.725  | 583.65   | 20.075   | 1.034395614 | 0.7223   | -1.048 |
| 94932_at   | 1431.8 | 1903.7 | 1579.2 | 1996.6 | 1348.3 | 1051.9 | 1372.5 | 1288.6 | 0.031374455 | 1727.825 | 1265.325 | 462.5    | 1.36551874  | 0.02112  | -1.361 |
| 94933_at   | 1122   | 1111.4 | 1143.4 | 1033.3 | 1209.6 | 1123.8 | 1135.5 | 1012.4 | 0.72220623  | 1102.525 | 1120.325 | 17.8     | 0.984111753 | 0.7442   | -1.015 |
| 94934_at   | 2514.8 | 1641.9 | 2057.5 | 1966.2 | 2404.2 | 2296.3 | 2388.4 | 2285.3 | 0.196008481 | 2045.1   | 2343.55  | 298.45   | 0.872650466 | 0.1468   | 1.159  |
| 94935_at   | 110.7  | 147.9  | 111.6  | 129.8  | 125.8  | 92.8   | 102.7  | 126.4  | 0.324916745 | 125      | 111.925  | 13.075   | 1.116819299 | 0.3211   | -1.118 |
| 94936_at   | 1.2    | 1.8    | 5.9    | 6.6    | 2.3    | 2.9    | 3.3    | 4.4    | 0.680161206 | 3.875    | 3.225    | 0.65     | 1.201550388 | 0.9298   | -1.042 |
| 94937_at   | 407.2  | 324.6  | 325.7  | 385.6  | 432.4  | 364.6  | 388.9  | 302.1  | 0.755823001 | 360.775  | 372      | 11.225   | 0.969825269 | 0.7841   | -1.028 |
| 94939_at   | 177.8  | 100.7  | 162.1  | 180.7  | 76.1   | 166.6  | 81.5   | 187.7  | 0.459974297 | 155.325  | 127.975  | 27.35    | 1.213713616 | 0.3968   | -1.283 |
| 94940_at   | 388.7  | 278.8  | 304.6  | 368.6  | 359.1  | 391.4  | 389.4  | 349.8  | 0.255282005 | 335.175  | 372.425  | 37.25    | 0.899979862 | 0.2232   | 1.12   |
| 94941_at   | 150    | 215.4  | 147.3  | 201.7  | 160.5  | 214.6  | 195.5  | 205.8  | 0.495138865 | 178.6    | 194.1    | 15.5     | 0.920144256 | 0.465    | -1.096 |
| 94942_at   | 1005.5 | 812.3  | 1044.6 | 807.2  | 924.9  | 918.2  | 858.3  | 978.4  | 0.971641186 | 917.4    | 919.95   | 2.55     | 0.99722811  | 0.9096   | -1.009 |
| 94944_at   | 204.6  | 302.6  | 257.9  | 244.5  | 183.6  | 265.2  | 327.8  | 194.9  | 0.817741389 | 252.4    | 242.875  | 9.525    | 1.039217705 | 0.7308   | -1.059 |
| 94945_at   | 479.8  | 419.4  | 437.4  | 397.3  | 515.3  | 399.6  | 476    | 465    | 0.347760663 | 433.475  | 463.975  | 30.5     | 0.9342637   | 0.357    | -1.068 |
| 94946_at   | 126    | 166.8  | 163    | 215.8  | 234.3  | 182.1  | 158.5  | 210    | 0.296142747 | 167.9    | 196.225  | 28.325   | 0.855650401 | 0.2849   | 1.177  |
| 94947_g_at | 215.3  | 319.5  | 209    | 437.8  | 320.4  | 268.2  | 196.6  | 336.7  | 0.820668241 | 295.4    | 280.475  | 14.925   | 1.053213299 | 0.9093   | -1.026 |
| 94948_at   | 941.6  | 1114.8 | 1043.8 | 1084.6 | 915.6  | 1062.4 | 1095.8 | 1218.6 | 0.727328062 | 1046.2   | 1073.1   | 26.9     | 0.974932439 | 0.7609   | -1.022 |
| 94951_at   | 730    | 572.6  | 728.3  | 690.4  | 473.3  | 605.5  | 490.1  | 644.1  | 0.065014469 | 680.325  | 553.25   | 127.075  | 1.229688206 | 0.0694   | -1.235 |
| 94952_at   | 907    | 1098.4 | 873.1  | 845.1  | 949.3  | 1314.6 | 1118.6 | 1588.9 | 0.103940501 | 930.9    | 1242.85  | 311.95   | 0.749004305 | 0.06916  | 1.318  |
| 94953_at   | 771.4  | 883.8  | 773.1  | 907.1  | 589.5  | 672.6  | 618.4  | 738.1  | 0.010359878 | 833.85   | 654.65   | 179.2    | 1.273734056 | 0.01001  | -1.275 |
| 94954_at   | 2101.8 | 1448.4 | 1711.6 | 1503.1 | 1329   | 1680.4 | 1759.4 | 1487.5 | 0.503781583 | 1691.225 | 1564.075 | 127.15   | 1.081294056 | 0.5125   | -1.076 |
| 94955_at   | 52.6   | 147.6  | 47.7   | 86.4   | 28.1   | 116.5  | 78.3   | 90.8   | 0.867691603 | 83.575   | 78.425   | 5.15     | 1.065667836 | 0.852    | -1.082 |
| 94956_at   | 433.2  | 575.6  | 508.2  | 396.6  | 657.6  | 432    | 465.2  | 413.8  | 0.849055071 | 478.4    | 492.15   | 13.75    | 0.972061363 | 0.8802   | -1.021 |
| 94957_at   | 793.5  | 546.3  | 641.3  | 743.6  | 474.9  | 667.7  | 609    | 586.2  | 0.210230937 | 681.175  | 584.45   | 96.725   | 1.165497476 | 0.2202   | -1.162 |
| 94958_at   | 78     | 226.8  | 127.5  | 159.3  | 110.7  | 198    | 220    | 87.4   | 0.896106573 | 147.9    | 154.025  | 6.125    | 0.960233728 | 0.9035   | -1.041 |
| 94961_at   | 33.1   | 15.3   | 50.7   | 41.1   | 61.3   | 25.7   | 49     | 36.3   | 0.48414978  | 35.05    | 43.075   | 8.025    | 0.81369704  | 0.4788   | 1.275  |
| 94962_g_at | 15.7   | 11.8   | 14.6   | 14     | 13.5   | 20.9   | 12.7   | 20.2   | 0.294993855 | 14.025   | 16.825   | 2.8      | 0.833580981 | 0.31     | 1.174  |
| 94963_at   | 3015.9 | 3143   | 2801.6 | 3096.1 | 1480.4 | 2034.4 | 1822.1 | 1725.2 | 0.000223641 | 3014.15  | 1765.525 | 1248.625 | 1.707225896 | 0.000266 | -1.717 |
| 94964_at   | 285.7  | 303    | 281.8  | 295.8  | 130.2  | 182.6  | 125.5  | 159.9  | 0.000764881 | 291.575  | 149.55   | 142.025  | 1.94968238  | 0.00028  | -1.972 |
| 94966_at   | 932.1  | 702.1  | 763.5  | 890.5  | 627    | 823.5  | 819.3  | 589.9  | 0.240092046 | 822.05   | 714.925  | 107.125  | 1.149840892 | 0.2358   | -1.156 |
| 94967_at   | 458.3  | 514.9  | 442.8  | 509.9  | 321.5  | 375.5  | 397.1  | 403.6  | 0.0062681   | 481.475  | 374.425  | 107.05   | 1.285905054 | 0.007617 | -1.288 |
| 94968_at   | 1829.4 | 1516.9 | 1740.4 | 1654.4 | 1573.7 | 1555.5 | 1749.8 | 1387.4 | 0.278786834 | 1685.275 | 1566.6   | 118.675  | 1.075753224 | 0.2776   | -1.077 |
| 94969_at   | 617.2  | 573.9  | 603    | 552.7  | 533.6  | 504    | 496.5  | 510.8  | 0.007111479 | 586.7    | 511.225  | 75.475   | 1.147635581 | 0.003352 | -1.147 |



|            |        |        |        |        |        |        |        |        |             |          |          |         |             |          |        |
|------------|--------|--------|--------|--------|--------|--------|--------|--------|-------------|----------|----------|---------|-------------|----------|--------|
| 94970_at   | 284.1  | 238.9  | 275.1  | 255.7  | 174    | 257    | 204.6  | 225.4  | 0.064543523 | 263.45   | 215.25   | 48.2    | 1.223925668 | 0.06015  | -1.234 |
| 94971_at   | 436.4  | 342.8  | 369.5  | 344.2  | 563.9  | 215.2  | 298.4  | 189.7  | 0.563537297 | 373.225  | 316.8    | 56.425  | 1.178109217 | 0.3476   | -1.29  |
| 94972_at   | 529.1  | 424.1  | 538.1  | 602    | 454    | 541.6  | 425.2  | 770.2  | 0.790630768 | 523.325  | 547.75   | 24.425  | 0.955408489 | 0.872    | -1.026 |
| 94973_at   | 714.7  | 837.5  | 693.3  | 704.8  | 602.5  | 779.3  | 699.2  | 796.8  | 0.756604015 | 737.575  | 719.45   | 18.125  | 1.025192856 | 0.731    | -1.028 |
| 94975_at   | 555.9  | 565.2  | 490    | 565.8  | 484.7  | 575.7  | 588    | 475.8  | 0.719510372 | 544.225  | 531.05   | 13.175  | 1.02480934  | 0.6907   | -1.028 |
| 94976_at   | 894.1  | 1319.2 | 974.4  | 1129.9 | 894.2  | 1054   | 1192.9 | 1278.1 | 0.846830476 | 1079.4   | 1104.8   | 25.4    | 0.977009413 | 0.8348   | -1.026 |
| 94977_at   | 995    | 1093.7 | 651.2  | 1050.6 | 732    | 857.1  | 845    | 910.2  | 0.361041574 | 947.625  | 836.075  | 111.55  | 1.133421045 | 0.4313   | -1.115 |
| 94978_at   | 1401.9 | 1572.3 | 1539.7 | 1516.8 | 1297.5 | 1455.8 | 1302.3 | 1689.2 | 0.51146657  | 1507.675 | 1436.2   | 71.475  | 1.049766746 | 0.4542   | -1.055 |
| 94979_at   | 614.3  | 920.6  | 607.8  | 786.2  | 665    | 804.6  | 810.1  | 838.1  | 0.603361202 | 732.225  | 779.45   | 47.225  | 0.939412406 | 0.5393   | -1.077 |
| 94980_at   | 439.4  | 333.9  | 384.1  | 400.7  | 393.2  | 312.6  | 316    | 324.7  | 0.118721968 | 389.525  | 336.625  | 52.9    | 1.157148162 | 0.113    | -1.157 |
| 94981_i_at | 393    | 496.9  | 475.7  | 328.4  | 854.8  | 442.5  | 586.3  | 280.4  | 0.41545978  | 423.5    | 541      | 117.5   | 0.782809612 | 0.509    | 1.195  |
| 94982_f_at | 797.4  | 739.9  | 660.6  | 704.7  | 1106.2 | 580    | 776.2  | 668.7  | 0.659567629 | 725.65   | 782.775  | 57.125  | 0.927022452 | 0.7501   | -1.049 |
| 94983_at   | 416.9  | 388.8  | 392.9  | 431.3  | 343.1  | 405.4  | 381.7  | 454.2  | 0.676091776 | 407.475  | 396.1    | 11.375  | 1.028717496 | 0.6264   | -1.033 |
| 94985_at   | 1213.9 | 1035.9 | 1096.1 | 1087.2 | 834.5  | 1056.4 | 904.8  | 988.4  | 0.040431153 | 1108.275 | 946.025  | 162.25  | 1.171507095 | 0.03963  | -1.174 |
| 94986_at   | 205.6  | 208.5  | 306    | 205.5  | 339    | 149.6  | 242.7  | 228.9  | 0.858464959 | 231.4    | 240.05   | 8.65    | 0.96396584  | 0.9563   | -1.011 |
| 94987_at   | 221.4  | 223    | 224.4  | 179.9  | 282.5  | 149.2  | 169.7  | 185.2  | 0.648874831 | 212.175  | 196.65   | 15.525  | 1.078947368 | 0.516    | -1.108 |
| 94988_at   | 39.1   | 89.6   | 73.6   | 76     | 48.5   | 67.9   | 135.8  | 49.7   | 0.810647924 | 69.575   | 75.475   | 5.9     | 0.92182842  | 0.9213   | -1.032 |
| 94989_at   | 1441.8 | 1244.2 | 1124.4 | 1156.6 | 1138.6 | 1120.9 | 1183.5 | 1241.3 | 0.408364712 | 1241.75  | 1171.075 | 70.675  | 1.060350533 | 0.3979   | -1.056 |
| 94990_at   | 675.8  | 726.7  | 735.3  | 541.7  | 974.6  | 679.3  | 670.5  | 675.7  | 0.401053689 | 669.875  | 750.025  | 80.15   | 0.893136895 | 0.3922   | 1.113  |
| 94991_at   | 155    | 302.2  | 220.6  | 252.6  | 134.6  | 218.4  | 272.1  | 206.9  | 0.578234143 | 232.6    | 208      | 24.6    | 1.118269231 | 0.5967   | -1.121 |
| 94992_at   | 1682.7 | 1150.5 | 1444.8 | 1287   | 967.4  | 1226.7 | 1299.3 | 1203.4 | 0.168146519 | 1391.25  | 1174.2   | 217.05  | 1.184849259 | 0.1619   | -1.18  |
| 94993_f_at | 44.6   | 50     | 20.6   | 41.1   | 29.4   | 53.4   | 44.3   | 46.9   | 0.609329634 | 39.075   | 43.5     | 4.425   | 0.898275862 | 0.5872   | 1.146  |
| 94994_at   | 5.4    | 2.2    | 7.5    | 3.7    | 3.1    | 6.6    | 2.4    | 2.1    | 0.484043839 | 4.7      | 3.55     | 1.15    | 1.323943662 | 0.4656   | -1.327 |
| 94995_at   | 312.1  | 215.2  | 299    | 446.8  | 309.7  | 418.7  | 354    | 282.1  | 0.702199476 | 318.275  | 341.125  | 22.85   | 0.933015757 | 0.6136   | -1.096 |
| 94997_at   | 306.1  | 214.4  | 242    | 240.6  | 285.3  | 298.1  | 265.9  | 353.1  | 0.114895152 | 250.775  | 300.6    | 49.825  | 0.83424817  | 0.1035   | 1.202  |
| 94998_at   | 473.3  | 320.9  | 527.9  | 393.2  | 374.1  | 562    | 368.7  | 485.3  | 0.783571577 | 428.825  | 447.525  | 18.7    | 0.958214625 | 0.7784   | -1.045 |
| 94999_at   | 57.3   | 82.5   | 80.7   | 89.2   | 136.4  | 50.4   | 61     | 69.2   | 0.934058013 | 77.425   | 79.25    | 1.825   | 0.976971609 | 0.8736   | -1.04  |
| 95000_g_at | 79.6   | 85.8   | 86.2   | 71     | 80.4   | 83.9   | 80.4   | 105    | 0.372071683 | 80.65    | 87.425   | 6.775   | 0.922505004 | 0.3655   | -1.08  |
| 95001_at   | 739    | 750.1  | 705.4  | 589.3  | 301    | 866.1  | 652.1  | 456.7  | 0.38329089  | 695.95   | 568.975  | 126.975 | 1.223164462 | 0.2913   | -1.313 |
| 95002_at   | 437.6  | 762.9  | 668.5  | 679.9  | 529.7  | 695.7  | 629.1  | 781.2  | 0.813425909 | 637.225  | 658.925  | 21.7    | 0.967067572 | 0.7741   | -1.045 |
| 95003_at   | 1827.6 | 1466   | 1295   | 1439   | 1649.4 | 1500.8 | 1496   | 1177.4 | 0.746823215 | 1506.9   | 1455.9   | 51      | 1.035029878 | 0.7511   | -1.034 |
| 95004_at   | 504.4  | 538.6  | 682.7  | 546.6  | 527.6  | 762.9  | 764.7  | 569.4  | 0.287129283 | 568.075  | 656.15   | 88.075  | 0.865770022 | 0.2878   | 1.147  |
| 95007_at   | 117.5  | 121.7  | 128.6  | 173.4  | 160.4  | 157.4  | 169.3  | 133.5  | 0.244373533 | 135.3    | 155.15   | 19.85   | 0.872059297 | 0.2056   | 1.157  |
| 95009_at   | 111.4  | 134    | 110    | 115.6  | 80.7   | 132.4  | 126.6  | 102.8  | 0.61343056  | 117.75   | 110.625  | 7.125   | 1.06440678  | 0.5482   | -1.081 |
| 95010_at   | 291.7  | 337    | 273.2  | 289    | 308.7  | 416.3  | 377.4  | 364.4  | 0.046140102 | 297.725  | 366.7    | 68.975  | 0.811903463 | 0.03636  | 1.228  |
| 95011_at   | 504.2  | 485.2  | 392.3  | 449.8  | 540.9  | 459.7  | 418.6  | 452.4  | 0.788519818 | 457.875  | 467.9    | 10.025  | 0.978574482 | 0.7879   | -1.022 |
| 95012_at   | 644.8  | 902.9  | 954.2  | 957.5  | 763.1  | 1182.1 | 986.6  | 1029.4 | 0.314842288 | 864.85   | 990.3    | 125.45  | 0.873321216 | 0.3414   | 1.146  |
| 95014_at   | 703.3  | 772.1  | 768.8  | 818.7  | 879.7  | 762.8  | 683.7  | 832.1  | 0.647198848 | 765.725  | 789.575  | 23.85   | 0.969793876 | 0.6778   | -1.028 |
| 95015_at   | 135    | 69.6   | 141.1  | 100.5  | 111.5  | 132.2  | 98.4   | 123.1  | 0.805967738 | 111.55   | 116.3    | 4.75    | 0.959157352 | 0.691    | -1.076 |
| 95016_at   | 1617.1 | 1431.9 | 1197   | 1675.9 | 1691.6 | 1574.9 | 1912.2 | 1648   | 0.139520436 | 1480.475 | 1706.675 | 226.2   | 0.867461585 | 0.1381   | 1.159  |
| 95018_r_at | 832.4  | 877    | 705.2  | 937    | 823.6  | 654.7  | 801.9  | 1070.1 | 0.997517356 | 837.9    | 837.575  | 0.325   | 1.000388025 | 0.9322   | -1.01  |
| 95019_at   | 595.9  | 518    | 539.2  | 517.8  | 880.3  | 741.7  | 787.3  | 672.7  | 0.008309346 | 542.725  | 770.5    | 227.775 | 0.704380273 | 0.00179  | 1.415  |
| 95020_at   | 169    | 293.3  | 229.5  | 222.3  | 272.2  | 289.8  | 290.2  | 247.7  | 0.166486701 | 228.525  | 274.975  | 46.45   | 0.831075552 | 0.1403   | 1.224  |
| 95021_at   | 890.9  | 1635.5 | 1384.9 | 1368.4 | 1477.7 | 1060.4 | 1653.4 | 1869.6 | 0.431423778 | 1319.925 | 1515.275 | 195.35  | 0.871079507 | 0.4598   | 1.151  |
| 95022_at   | 1194.4 | 2116.1 | 981.1  | 1794.5 | 1584.1 | 1357.7 | 1308.9 | 1573.4 | 0.823420994 | 1521.525 | 1456.025 | 65.5    | 1.044985491 | 0.9952   | -1.001 |
| 95023_at   | 1737.4 | 2397.1 | 2418.6 | 2469.3 | 2297.3 | 2283.7 | 2502.3 | 2199.6 | 0.743321389 | 2255.6   | 2320.725 | 65.125  | 0.971937649 | 0.6873   | -1.038 |
| 95024_at   | 17.1   | 9.6    | 21.3   | 13.7   | 28.9   | 28.2   | 29.3   | 36.7   | 0.003341245 | 15.425   | 30.775   | 15.35   | 0.501218522 | 0.006968 | 2.069  |
| 95025_at   | 586.2  | 598.6  | 574.1  | 677.7  | 561.1  | 682.1  | 732.6  | 891.2  | 0.216492255 | 609.15   | 716.75   | 107.6   | 0.849877921 | 0.1914   | 1.163  |
| 95026_at   | 210.6  | 151.4  | 171.8  | 182.3  | 154.2  | 169    | 137.9  | 172.2  | 0.21487214  | 179.025  | 158.325  | 20.7    | 1.130743723 | 0.2104   | -1.127 |
| 95027_at   | 237.1  | 492.4  | 366.4  | 361.2  | 290.1  | 492.6  | 327.1  | 380.1  | 0.908425863 | 364.275  | 372.475  | 8.2     | 0.9779851   | 0.8596   | -1.035 |
| 95028_r_at | 1225.3 | 883.3  | 1164   | 1234   | 1073.9 | 1190.2 | 1519.4 | 980.9  | 0.67113426  | 1126.65  | 1191.1   | 64.45   | 0.945890353 | 0.6945   | -1.052 |
| 95029_at   | 282.8  | 479.2  | 371.6  | 419.6  | 492.4  | 444.4  | 470.8  | 476.1  | 0.138659798 | 388.3    | 470.925  | 82.625  | 0.824547433 | 0.1151   | 1.234  |
| 95030_at   | 745.1  | 834.8  | 729.4  | 464.1  | 1489.4 | 1093.5 | 1376.8 | 970.6  | 0.012662671 | 693.35   | 1232.575 | 539.225 | 0.56252155  | 0.01168  | 1.793  |
| 95031_at   | 129.5  | 145.4  | 108.7  | 111    | 95.1   | 103.7  | 94.1   | 156.8  | 0.545177033 | 123.65   | 112.425  | 11.225  | 1.099844341 | 0.4537   | -1.118 |
| 95032_at   | 2174.6 | 1847.6 | 2193.1 | 1943.2 | 1515.8 | 1554.1 | 1669.5 | 1095.7 | 0.011013361 | 2039.625 | 1458.775 | 580.85  | 1.398176552 | 0.01521  | -1.412 |
| 95033_at   | 672.4  | 742    | 759    | 788.9  | 764.3  | 798.7  | 814.9  | 1128.3 | 0.207380871 | 740.575  | 876.55   | 135.975 | 0.844874793 | 0.1506   | 1.171  |



|            |         |        |         |        |         |        |         |         |             |           |           |         |             |          |        |
|------------|---------|--------|---------|--------|---------|--------|---------|---------|-------------|-----------|-----------|---------|-------------|----------|--------|
| 95034_f_at | 294     | 382.2  | 245.6   | 380.3  | 416.5   | 371.7  | 395.7   | 404.5   | 0.120650441 | 325.525   | 397.1     | 71.575  | 0.819755729 | 0.09905  | 1.24   |
| 95035_at   | 609.7   | 944.5  | 729.7   | 769.8  | 1038.5  | 909.2  | 930.4   | 879.3   | 0.079406793 | 763.425   | 939.35    | 175.925 | 0.81271624  | 0.06607  | 1.243  |
| 95036_at   | 133.4   | 179.2  | 130.7   | 110.9  | 175.8   | 150    | 174.8   | 209     | 0.08637045  | 138.55    | 177.4     | 38.85   | 0.781003382 | 0.07862  | 1.291  |
| 95037_at   | 552.4   | 818    | 885.6   | 744.4  | 712.3   | 805.4  | 652.3   | 582.4   | 0.502463305 | 750.1     | 688.1     | 62      | 1.090103183 | 0.5517   | -1.081 |
| 95040_at   | 75.3    | 180.3  | 108.2   | 139.9  | 102.8   | 163.8  | 170.4   | 139.9   | 0.528300169 | 125.925   | 144.225   | 18.3    | 0.873114925 | 0.4738   | 1.182  |
| 95041_at   | 567     | 570.9  | 575     | 556.7  | 702.1   | 478.4  | 583.8   | 515.5   | 0.961975137 | 567.4     | 569.95    | 2.55    | 0.995525923 | 0.9432   | -1.006 |
| 95042_at   | 2026.3  | 1602.2 | 1794.6  | 1656.8 | 1855.2  | 1871   | 1961.8  | 1707    | 0.501462933 | 1769.975  | 1848.75   | 78.775  | 0.957390128 | 0.4661   | -1.048 |
| 95043_at   | 26.5    | 37.2   | 24.6    | 34.4   | 40.1    | 7.2    | 21.3    | 52.3    | 0.96790046  | 30.675    | 30.225    | 0.45    | 1.014888337 | 0.6193   | -1.267 |
| 95044_at   | 1645.6  | 1634.4 | 1233.1  | 1510.9 | 1331.4  | 1359.9 | 1478    | 1463.8  | 0.397175181 | 1506      | 1408.275  | 97.725  | 1.069393407 | 0.4265   | -1.064 |
| 95045_at   | 889.4   | 1187.6 | 1200.5  | 1261.4 | 1001.9  | 1163.8 | 1263.6  | 688.3   | 0.515214848 | 1134.725  | 1029.4    | 105.325 | 1.102316884 | 0.4932   | -1.121 |
| 95046_s_at | 853.8   | 798.6  | 851.3   | 596.5  | 883.4   | 800.8  | 866.1   | 791     | 0.408870452 | 775.05    | 835.325   | 60.275  | 0.927842457 | 0.3842   | -1.088 |
| 95048_at   | 97.9    | 151.9  | 182.8   | 95.6   | 99.2    | 102.3  | 52.5    | 84.5    | 0.112442572 | 132.05    | 84.625    | 47.425  | 1.560413589 | 0.09702  | -1.55  |
| 95049_at   | 6804.5  | 7440.8 | 7526.6  | 6062.9 | 15248.1 | 5606.7 | 8739.5  | 5899.9  | 0.457439108 | 6958.7    | 8873.55   | 1914.85 | 0.784206997 | 0.5203   | 1.175  |
| 95050_at   | 1179.9  | 738.1  | 1010.2  | 1116.3 | 737     | 743.7  | 841.9   | 932.2   | 0.13653582  | 1011.125  | 813.7     | 197.425 | 1.242626275 | 0.1328   | -1.229 |
| 95052_at   | 494.2   | 561.2  | 552.2   | 550.7  | 713.5   | 714.5  | 676.4   | 795.9   | 0.001555411 | 539.575   | 725.075   | 185.5   | 0.744164397 | 0.000598 | 1.343  |
| 95053_s_at | 2810.4  | 2895.7 | 2729.1  | 2452.2 | 4512.6  | 2641.4 | 3296.3  | 2730.8  | 0.277354621 | 2721.85   | 3295.275  | 573.425 | 0.825985692 | 0.2335   | 1.185  |
| 95054_at   | 1226.1  | 880.6  | 913.2   | 880.2  | 790.9   | 672.2  | 976.9   | 892.4   | 0.234484532 | 975.025   | 833.1     | 141.925 | 1.1703577   | 0.2176   | -1.17  |
| 95056_r_at | 29      | 39.1   | 39      | 49.4   | 32.4    | 27.4   | 35.7    | 46.2    | 0.544290405 | 39.125    | 35.425    | 3.7     | 1.104446013 | 0.5431   | -1.105 |
| 95057_at   | 718.8   | 680.6  | 617.4   | 649.4  | 667.4   | 718.6  | 732.8   | 882     | 0.171641415 | 666.55    | 750.2     | 83.65   | 0.888496401 | 0.1416   | 1.121  |
| 95058_f_at | 1361.5  | 1236.1 | 1142.5  | 1365.3 | 1134.3  | 1289.6 | 1143.1  | 1232.6  | 0.292015909 | 1276.35   | 1199.9    | 76.45   | 1.063713643 | 0.2952   | -1.062 |
| 95059_at   | 4022.4  | 3629.9 | 3786.8  | 3390.4 | 4412.4  | 4139.7 | 3762.3  | 3234.3  | 0.562247359 | 3707.375  | 3887.175  | 179.8   | 0.953745329 | 0.598    | -1.043 |
| 95060_at   | 34.7    | 49.5   | 49.2    | 29.7   | 14.1    | 24.4   | 35.6    | 40.2    | 0.166897186 | 40.775    | 28.575    | 12.2    | 1.426946632 | 0.1795   | -1.502 |
| 95061_at   | 325.4   | 343.6  | 272.2   | 289.7  | 292.9   | 323.2  | 281.5   | 295.7   | 0.635366349 | 307.725   | 298.325   | 9.4     | 1.03150926  | 0.6577   | -1.029 |
| 95062_at   | 239.3   | 222.5  | 206.3   | 262.5  | 243.3   | 305.3  | 302.1   | 256.1   | 0.071648474 | 232.65    | 276.7     | 44.05   | 0.840802313 | 0.06721  | 1.188  |
| 95063_at   | 1252.8  | 836.4  | 1201.3  | 1243.6 | 841.1   | 896.8  | 961.6   | 988.1   | 0.120798307 | 1133.525  | 921.9     | 211.625 | 1.229553097 | 0.1091   | -1.216 |
| 95064_at   | 10924.1 | 11405  | 11655.6 | 9939.6 | 17320.4 | 9967.4 | 13481.8 | 10678.1 | 0.345147449 | 10981.075 | 12861.925 | 1880.85 | 0.853766058 | 0.3365   | 1.145  |
| 95065_at   | 581.2   | 505.1  | 607.8   | 567.7  | 485.8   | 639.6  | 691.3   | 582.2   | 0.520542148 | 565.45    | 599.725   | 34.275  | 0.942848806 | 0.561    | -1.054 |
| 95066_at   | 1058.6  | 1197.1 | 1036    | 1027.2 | 1181.7  | 1002.9 | 1055.5  | 1000.5  | 0.747755875 | 1079.725  | 1060.15   | 19.575  | 1.018464368 | 0.7352   | -1.019 |
| 95067_at   | 556     | 613.7  | 599.6   | 630.9  | 681.5   | 529.7  | 633     | 566.6   | 0.946786629 | 600.05    | 602.7     | 2.65    | 0.995603119 | 0.9915   | -1.001 |
| 95068_at   | 471.4   | 364.5  | 427.5   | 357.8  | 329     | 412.4  | 390.6   | 400.8   | 0.529042709 | 405.3     | 383.2     | 22.1    | 1.057672234 | 0.5466   | -1.055 |
| 95069_at   | 2716.7  | 2638.3 | 2153    | 2231.6 | 2156    | 2519   | 2606.2  | 2284.5  | 0.813647759 | 2434.9    | 2391.425  | 43.475  | 1.018179537 | 0.8363   | -1.016 |
| 95070_at   | 775.4   | 587.3  | 673.8   | 613.9  | 581.9   | 768.6  | 613.6   | 658.7   | 0.909738959 | 662.6     | 655.7     | 6.9     | 1.010523105 | 0.9088   | -1.01  |
| 95071_at   | 188.6   | 235.3  | 204.4   | 233.4  | 298.5   | 265.9  | 259.3   | 267.8   | 0.008134141 | 215.425   | 272.875   | 57.45   | 0.78946404  | 0.008426 | 1.27   |
| 95072_at   | 3284.1  | 6391.7 | 5009.4  | 4960.3 | 7993.7  | 5105.5 | 6142.3  | 5000.4  | 0.268274922 | 4911.375  | 6060.475  | 1149.1  | 0.8103944   | 0.2588   | 1.245  |
| 95073_at   | 5.3     | 12.5   | 11.3    | 12.6   | 9.3     | 10.6   | 8.2     | 25.4    | 0.538228255 | 10.425    | 13.375    | 2.95    | 0.779439252 | 0.5784   | 1.213  |
| 95074_at   | 820.4   | 958.5  | 961.9   | 1014.4 | 833.5   | 882.4  | 920.1   | 1034.2  | 0.733478247 | 938.8     | 917.55    | 21.25   | 1.023159501 | 0.7345   | -1.023 |
| 95075_at   | 205.1   | 158.7  | 222     | 222.8  | 210.7   | 214.5  | 226.4   | 144.2   | 0.897999279 | 202.15    | 198.95    | 3.2     | 1.016084443 | 0.8721   | -1.022 |
| 95076_at   | 1874.2  | 2249.6 | 1990.3  | 1679.5 | 2586.7  | 1892.9 | 2112.5  | 1822.3  | 0.490364159 | 1948.4    | 2103.6    | 155.2   | 0.926221715 | 0.4924   | -1.075 |
| 95077_at   | 871.8   | 619.3  | 785.1   | 693.4  | 499.3   | 775.3  | 618.2   | 651.4   | 0.22658086  | 742.4     | 636.05    | 106.35  | 1.167203836 | 0.2248   | -1.172 |
| 95078_at   | 223.3   | 240.2  | 249.5   | 225.4  | 203.3   | 265.3  | 240.5   | 260.6   | 0.637779133 | 234.6     | 242.425   | 7.825   | 0.967721976 | 0.6827   | -1.029 |
| 95079_at   | 5023.9  | 4710.5 | 4938.7  | 4747.9 | 5317.3  | 5321.9 | 5350    | 5581    | 0.001714804 | 4855.25   | 5392.55   | 537.3   | 0.900362537 | 0.001608 | 1.111  |
| 95081_at   | 357.7   | 328.5  | 355.7   | 340.5  | 503.9   | 355.4  | 366.9   | 436     | 0.133425965 | 345.6     | 415.55    | 69.95   | 0.831668873 | 0.08141  | 1.191  |
| 95082_at   | 1419.6  | 2039.2 | 1406.1  | 979.1  | 2386.6  | 1935.6 | 1809    | 1756.7  | 0.105588637 | 1461      | 1971.975  | 510.975 | 0.740881603 | 0.09554  | 1.385  |
| 95083_at   | 731.6   | 800.7  | 679.7   | 576    | 705     | 859    | 589.7   | 674.9   | 0.89477878  | 697       | 707.15    | 10.15   | 0.98564661  | 0.9098   | -1.012 |
| 95084_f_at | 1662.6  | 2269.8 | 1714.3  | 1910.9 | 3493.6  | 1761.8 | 2287.6  | 2435.1  | 0.196905622 | 1889.4    | 2494.525  | 605.125 | 0.757418747 | 0.1568   | 1.29   |
| 95085_r_at | 24.4    | 39     | 58.6    | 21.2   | 83.1    | 55     | 46      | 47.6    | 0.117862106 | 35.8      | 57.925    | 22.125  | 0.61804057  | 0.09439  | 1.706  |
| 95086_at   | 2500.2  | 2447.2 | 2523.5  | 2145.2 | 2601.6  | 2441.4 | 2347.5  | 2293.1  | 0.884199208 | 2404.025  | 2420.9    | 16.875  | 0.993029452 | 0.8713   | -1.008 |
| 95090_at   | 1129.5  | 1640.9 | 1384.3  | 1229.7 | 1516.5  | 1384.2 | 1460.6  | 1465.6  | 0.398844609 | 1346.1    | 1456.725  | 110.625 | 0.924059105 | 0.3283   | -1.092 |
| 95091_at   | 2538.7  | 2280.5 | 2500.4  | 2074.8 | 2869.3  | 2101   | 2334.9  | 2092.1  | 0.997402064 | 2348.6    | 2349.325  | 0.725   | 0.999691401 | 0.9567   | -1.005 |
| 95092_at   | 577     | 694.8  | 605     | 718.4  | 646.4   | 724.5  | 554.8   | 828.3   | 0.582203527 | 648.8     | 688.5     | 39.7    | 0.942338417 | 0.6177   | -1.054 |
| 95093_at   | 332.4   | 232.4  | 333.7   | 337.9  | 296.2   | 287.4  | 313.7   | 258.7   | 0.511831004 | 309.1     | 289       | 20.1    | 1.069550173 | 0.5826   | -1.06  |
| 95094_g_at | 361     | 255.9  | 327.6   | 374.9  | 231.1   | 291.7  | 316     | 223.1   | 0.11656179  | 329.85    | 265.475   | 64.375  | 1.242489877 | 0.1236   | -1.243 |
| 95095_at   | 627.2   | 754.2  | 682.7   | 439    | 769     | 863.4  | 777.1   | 575.3   | 0.233700036 | 625.775   | 746.2     | 120.425 | 0.838615653 | 0.2543   | 1.203  |
| 95096_at   | 2641    | 3085.8 | 2622.4  | 2949.1 | 2220.3  | 2710.8 | 2167    | 3095.6  | 0.320858839 | 2824.575  | 2548.425  | 276.15  | 1.108361047 | 0.2813   | -1.118 |
| 95097_at   | 2218.6  | 1982   | 1858.8  | 1852.3 | 1897.8  | 1824.7 | 1733.3  | 1523    | 0.095578667 | 1977.925  | 1744.7    | 233.225 | 1.133676277 | 0.09534  | -1.134 |
| 95098_at   | 1158.4  | 1194.5 | 1017.5  | 938.8  | 993.5   | 1014.1 | 845.2   | 857.8   | 0.095343129 | 1077.3    | 927.65    | 149.65  | 1.161321619 | 0.0914   | -1.16  |



|            |        |        |        |        |        |        |        |        |             |          |          |         |             |          |        |
|------------|--------|--------|--------|--------|--------|--------|--------|--------|-------------|----------|----------|---------|-------------|----------|--------|
| 95100_at   | 6555.4 | 7191.1 | 7679.8 | 6083   | 7992.9 | 6459   | 7385.3 | 6325.8 | 0.767755586 | 6877.325 | 7040.75  | 163.425 | 0.976788694 | 0.7741   | -1.023 |
| 95101_at   | 526.5  | 384.2  | 473.1  | 568.4  | 411.5  | 579.3  | 481.1  | 351.1  | 0.627705288 | 488.05   | 455.75   | 32.3    | 1.070872189 | 0.6025   | -1.078 |
| 95102_at   | 1217.4 | 1171.3 | 1342.2 | 1336.5 | 1080.8 | 1390   | 1386.8 | 1699.4 | 0.414802589 | 1266.85  | 1389.25  | 122.4   | 0.911894907 | 0.442    | -1.085 |
| 95103_at   | 1274.1 | 1104.8 | 1064.7 | 1043.4 | 1223.8 | 1115.4 | 1131.7 | 981.5  | 0.908745619 | 1121.75  | 1113.1   | 8.65    | 1.00777109  | 0.9086   | -1.008 |
| 95104_at   | 863    | 615.6  | 787.7  | 623.2  | 659.6  | 713.8  | 627.2  | 717    | 0.548053712 | 722.375  | 679.4    | 42.975  | 1.063254342 | 0.5864   | -1.053 |
| 95105_at   | 3006   | 3177.6 | 2988.6 | 3233   | 3734.9 | 2922.3 | 3214.2 | 3213   | 0.401660988 | 3101.3   | 3271.1   | 169.8   | 0.948090856 | 0.3939   | -1.051 |
| 95108_at   | 6      | 33.9   | 51     | 52.9   | 14.3   | 29.5   | 8.2    | 22.7   | 0.216492736 | 35.95    | 18.675   | 17.275  | 1.925033467 | 0.4372   | -1.626 |
| 95109_at   | 1968.3 | 1432.2 | 1591.9 | 1624.9 | 1339   | 1370.8 | 1463.7 | 1505.4 | 0.12634767  | 1654.325 | 1419.725 | 234.6   | 1.165243269 | 0.08541  | -1.159 |
| 95110_at   | 633.6  | 667.2  | 687.1  | 743.9  | 771.8  | 695.7  | 752.7  | 507.9  | 0.989273201 | 682.95   | 682.025  | 0.925   | 1.001356255 | 0.9035   | -1.013 |
| 95111_i_at | 2.2    | 12.6   | 13.7   | 18.6   | 40.1   | 19.6   | 44.7   | 35.5   | 0.015305489 | 11.775   | 34.975   | 23.2    | 0.336669049 | 0.04551  | 3.628  |
| 95112_f_at | 391.5  | 395.6  | 371.3  | 435.7  | 482.2  | 350.6  | 458.6  | 398.7  | 0.501254687 | 398.525  | 422.525  | 24      | 0.943198627 | 0.5324   | -1.054 |
| 95113_at   | 31.3   | 40.4   | 57.9   | 41.9   | 57     | 56     | 21.9   | 80.9   | 0.450906954 | 42.875   | 53.95    | 11.075  | 0.794717331 | 0.6372   | 1.165  |
| 95114_s_at | 1712.7 | 1323.5 | 1562.2 | 1231.8 | 1682.1 | 1435.3 | 1447.5 | 1341.7 | 0.890106891 | 1457.55  | 1476.65  | 19.1    | 0.987065317 | 0.8463   | -1.018 |
| 95117_at   | 796    | 1087.9 | 942.7  | 1048.5 | 1032.6 | 1027.4 | 1194.3 | 1013   | 0.26235831  | 968.775  | 1066.825 | 98.05   | 0.908091768 | 0.2523   | -1.107 |
| 95118_r_at | 2844.9 | 2646   | 2658.6 | 2511.3 | 2989.3 | 2429.2 | 2610.7 | 2255.1 | 0.611580054 | 2665.2   | 2571.075 | 94.125  | 1.0366092   | 0.5579   | -1.041 |
| 95119_at   | 462.9  | 528.1  | 587.7  | 538.5  | 615.5  | 479.8  | 606    | 608.2  | 0.292818911 | 529.3    | 577.375  | 48.075  | 0.916735224 | 0.3144   | -1.089 |
| 95120_at   | 73.1   | 66.5   | 67.8   | 66.2   | 99.1   | 119.2  | 95     | 88.8   | 0.013705777 | 68.4     | 100.525  | 32.125  | 0.680427754 | 0.001324 | 1.461  |
| 95121_at   | 248.9  | 187.6  | 212.4  | 232.6  | 201.5  | 207.9  | 223.2  | 173.6  | 0.307926045 | 220.375  | 201.55   | 18.825  | 1.093401141 | 0.3187   | -1.092 |
| 95122_g_at | 158.2  | 121.6  | 138.3  | 163.2  | 133.1  | 143.5  | 112.3  | 118.3  | 0.17463754  | 145.325  | 126.8    | 18.525  | 1.146096215 | 0.1762   | -1.144 |
| 95123_at   | 142.6  | 208.2  | 178    | 158.2  | 202.9  | 181.5  | 204.4  | 208.1  | 0.147476318 | 171.75   | 199.225  | 27.475  | 0.862090601 | 0.1208   | 1.17   |
| 95124_i_at | 1926.4 | 1630   | 1880.4 | 1643.6 | 1982.6 | 1812.3 | 1942.4 | 1923.7 | 0.161213199 | 1770.1   | 1915.25  | 145.15  | 0.924213549 | 0.1412   | -1.085 |
| 95125_f_at | 535.3  | 507.3  | 589.4  | 523    | 603.2  | 648.1  | 625.9  | 656.2  | 0.006239836 | 538.75   | 633.35   | 94.6    | 0.85063551  | 0.004886 | 1.177  |
| 95128_at   | 1448   | 1586.7 | 1264.2 | 1367.7 | 1512.3 | 1546.6 | 1597.1 | 1401.9 | 0.274378685 | 1416.65  | 1514.475 | 97.825  | 0.935406659 | 0.2584   | -1.071 |
| 95129_at   | 518.1  | 1445.1 | 873.6  | 747.7  | 830.8  | 774.4  | 779.8  | 775.8  | 0.628960943 | 896.125  | 790.2    | 105.925 | 1.134048342 | 0.7979   | -1.059 |
| 95131_f_at | 5083.2 | 5249.2 | 4386.3 | 4388.5 | 7275.5 | 3759.1 | 5091   | 3596.4 | 0.87119791  | 4776.8   | 4930.5   | 153.7   | 0.968826691 | 0.9713   | -1.006 |
| 95132_r_at | 4439.6 | 4816.3 | 3950.8 | 3625.1 | 7828.1 | 3362.3 | 4907.7 | 3705.4 | 0.523995777 | 4207.95  | 4950.875 | 742.925 | 0.849940667 | 0.5961   | -1.118 |
| 95133_at   | 3178.5 | 2566.4 | 3403.3 | 2455.1 | 2226.4 | 1905.9 | 1605.4 | 2284.9 | 0.022074363 | 2900.825 | 2005.65  | 895.175 | 1.446326627 | 0.01772  | -1.447 |
| 95134_at   | 258.5  | 253.6  | 289.2  | 430.8  | 405.8  | 238.2  | 254.6  | 481.2  | 0.629600156 | 308.025  | 344.95   | 36.925  | 0.892955501 | 0.6775   | -1.097 |
| 95135_at   | 748.3  | 1013   | 837.9  | 1076.9 | 958    | 1111.5 | 1082.8 | 1044.3 | 0.190446818 | 919.025  | 1049.15  | 130.125 | 0.875971024 | 0.168    | 1.152  |
| 95136_at   | 798.4  | 703.7  | 694    | 663.2  | 871.8  | 684.1  | 769    | 603.7  | 0.800146963 | 714.825  | 732.15   | 17.325  | 0.976336816 | 0.8524   | -1.017 |
| 95137_at   | 1638.1 | 1259.5 | 1725.8 | 1370.8 | 1567.6 | 1312.4 | 1323.8 | 1512.1 | 0.609559436 | 1498.55  | 1428.975 | 69.575  | 1.048688745 | 0.6421   | -1.043 |
| 95138_at   | 338.1  | 407.3  | 369.9  | 386.4  | 322.7  | 380.7  | 399.6  | 380.6  | 0.845120678 | 375.425  | 370.9    | 4.525   | 1.012200054 | 0.8385   | -1.013 |
| 95139_at   | 447.3  | 441.5  | 479    | 484.5  | 404.1  | 425.3  | 382.8  | 404.6  | 0.006174246 | 463.075  | 404.2    | 58.875  | 1.14565809  | 0.005346 | -1.146 |
| 95140_at   | 2656.2 | 2257.3 | 2253.1 | 2488.9 | 2011.5 | 2262.7 | 2148.2 | 2477.8 | 0.222888363 | 2413.875 | 2225.05  | 188.825 | 1.084863261 | 0.2179   | -1.085 |
| 95141_at   | 18.2   | 47.2   | 90.3   | 54.4   | 10.2   | 37.1   | 21     | 49.9   | 0.2410362   | 52.525   | 29.55    | 22.975  | 1.77749577  | 0.2662   | -1.809 |
| 95142_s_at | 3576.4 | 4525   | 3787   | 3340.6 | 3939.5 | 3538.8 | 3712.2 | 3356.3 | 0.578930134 | 3807.25  | 3636.7   | 170.55  | 1.046896912 | 0.5956   | -1.042 |
| 95144_at   | 1543.6 | 1606.4 | 1572.7 | 1526   | 1525.1 | 1531.9 | 1580   | 1640.2 | 0.831780639 | 1562.175 | 1569.3   | 7.125   | 0.995459759 | 0.839    | -1.004 |
| 95146_at   | 2412.8 | 1775.9 | 2035.3 | 2213.1 | 1486.4 | 1932.1 | 1750.4 | 2035.5 | 0.140245617 | 2109.275 | 1801.1   | 308.175 | 1.17110377  | 0.1463   | -1.172 |
| 95147_at   | 2061.2 | 2221.5 | 2090.9 | 1581.3 | 3157.5 | 1840.9 | 2144   | 1825.9 | 0.500550027 | 1988.725 | 2242.075 | 253.35  | 0.887001996 | 0.5193   | -1.107 |
| 95148_at   | 944.3  | 1315.8 | 1279.1 | 1131.9 | 1381.4 | 1180.6 | 1469.5 | 978    | 0.564774262 | 1167.775 | 1252.375 | 84.6    | 0.932448348 | 0.5962   | -1.068 |
| 95149_at   | 2243.3 | 1691.6 | 2392.4 | 2042   | 1770.6 | 2163.6 | 2186.9 | 1825   | 0.594232293 | 2092.325 | 1986.525 | 105.8   | 1.053258831 | 0.6253   | -1.049 |
| 95150_at   | 65     | 142.5  | 62.2   | 15     | 136.8  | 82     | 85.6   | 110.2  | 0.32549823  | 71.175   | 103.65   | 32.475  | 0.686685962 | 0.2427   | 1.87   |
| 95151_at   | 91.6   | 165    | 160.4  | 43.4   | 49     | 173.1  | 73.2   | 90.3   | 0.654588793 | 115.1    | 96.4     | 18.7    | 1.193983402 | 0.7132   | -1.171 |
| 95152_g_at | 126.5  | 212.3  | 137.8  | 204.4  | 197.2  | 147    | 118.8  | 225.3  | 0.957318166 | 170.25   | 172.075  | 1.825   | 0.98939416  | 0.9751   | -1.006 |
| 95153_at   | 1800.9 | 1354.5 | 1553.5 | 1430   | 1238.4 | 1599.5 | 1664   | 1231.7 | 0.528190916 | 1534.725 | 1433.4   | 101.325 | 1.070688573 | 0.5048   | -1.075 |
| 95154_at   | 2.9    | 3.3    | 1.9    | 3.6    | 3.2    | 1.7    | 3.3    | 11.9   | 0.434469485 | 2.925    | 5.025    | 2.1     | 0.582089552 | 0.5105   | 1.355  |
| 95155_at   | 233.8  | 399.3  | 335.4  | 307.3  | 514.6  | 349.6  | 394.4  | 308.3  | 0.24618808  | 318.95   | 391.725  | 72.775  | 0.814219159 | 0.2368   | 1.228  |
| 95156_g_at | 9.6    | 115.6  | 70.2   | 40.5   | 152.5  | 79.2   | 76.4   | 52.2   | 0.358686349 | 58.975   | 90.075   | 31.1    | 0.654732168 | 0.2863   | 1.976  |
| 95157_at   | 26.2   | 248.1  | 102.8  | 68.2   | 182.7  | 288.1  | 60.4   | 391.5  | 0.21998262  | 111.325  | 230.675  | 119.35  | 0.482605397 | 0.2312   | 2.287  |
| 95158_at   | 2022.9 | 2419   | 2268.2 | 2534.9 | 2617.1 | 1657.2 | 2382.2 | 2344.8 | 0.806178236 | 2311.25  | 2250.325 | 60.925  | 1.027073867 | 0.7487   | -1.038 |
| 95159_at   | 723.5  | 655.4  | 640.4  | 637.9  | 628    | 586.6  | 589.7  | 841.2  | 0.965893874 | 664.3    | 661.375  | 2.925   | 1.004422604 | 0.8776   | -1.015 |
| 95161_at   | 1191.6 | 1902.9 | 1694.3 | 1692.5 | 2005.7 | 1715.4 | 1585.2 | 2062.4 | 0.289576438 | 1620.325 | 1842.175 | 221.85  | 0.879571702 | 0.2945   | 1.147  |
| 95164_at   | 9.5    | 46.6   | 42.4   | 41.8   | 80.8   | 29.9   | 29.8   | 32     | 0.618362302 | 35.075   | 43.125   | 8.05    | 0.813333333 | 0.5746   | 1.308  |
| 95165_at   | 135.3  | 233.8  | 283.3  | 226.6  | 295.1  | 344.5  | 183    | 255.2  | 0.321762982 | 219.75   | 269.45   | 49.7    | 0.815550195 | 0.3465   | 1.236  |
| 95177_at   | 14.3   | 19.7   | 23.2   | 14.5   | 11.8   | 9      | 6.2    | 23.6   | 0.28629086  | 17.925   | 12.65    | 5.275   | 1.416996047 | 0.1917   | -1.567 |
| 95182_at   | 30.2   | 67.5   | 62.1   | 63.2   | 54.7   | 79.3   | 70.8   | 63.3   | 0.314178729 | 55.75    | 67.025   | 11.275  | 0.831779187 | 0.3217   | 1.248  |



|            |         |         |         |         |         |         |        |         |             |           |          |          |             |          |        |
|------------|---------|---------|---------|---------|---------|---------|--------|---------|-------------|-----------|----------|----------|-------------|----------|--------|
| 95183_i_at | 48.6    | 37.2    | 33      | 63.5    | 73.1    | 68.7    | 56.7   | 7.8     | 0.733380954 | 45.575    | 51.575   | 6        | 0.883664566 | 0.8172   | -1.144 |
| 95184_f_at | 179.4   | 155     | 142.5   | 264.3   | 242.4   | 267.2   | 170    | 220.7   | 0.293968291 | 185.3     | 225.075  | 39.775   | 0.823281129 | 0.2563   | 1.234  |
| 95215_f_at | 10297.2 | 15778.9 | 12234.2 | 10186.4 | 21395.3 | 12069.6 | 15065  | 12110.3 | 0.288878276 | 12124.175 | 15160.05 | 3035.875 | 0.799745054 | 0.2585   | 1.235  |
| 95228_f_at | 27.5    | 23.6    | 33.6    | 28.7    | 27.3    | 37.5    | 22     | 29.7    | 0.84725498  | 28.35     | 29.125   | 0.775    | 0.973390558 | 0.9071   | -1.016 |
| 95232_at   | 521.8   | 582.7   | 390.5   | 491.8   | 522.1   | 532.5   | 508.3  | 674.1   | 0.304308867 | 496.7     | 559.25   | 62.55    | 0.888153777 | 0.2949   | 1.13   |
| 95244_at   | 78.1    | 54.5    | 72.9    | 57.3    | 60.1    | 74.8    | 57.9   | 67.2    | 0.923362113 | 65.7      | 65       | 0.7      | 1.010769231 | 0.9721   | -1.004 |
| 95246_at   | 2.6     | 2.1     | 3.4     | 3.3     | 1.9     | 3.3     | 4.8    | 3.5     | 0.471377353 | 2.85      | 3.375    | 0.525    | 0.844444444 | 0.5793   | 1.142  |
| 95247_at   | 24.9    | 17.8    | 5.1     | 28.6    | 40.2    | 13      | 5.2    | 27.4    | 0.81068792  | 19.1      | 21.45    | 2.35     | 0.89044289  | 0.9589   | -1.033 |
| 95248_at   | 5.1     | 17.6    | 6.1     | 5.7     | 3.7     | 6.1     | 3.9    | 3.6     | 0.247974624 | 8.625     | 4.325    | 4.3      | 1.994219653 | 0.1162   | -1.772 |
| 95249_at   | 1.7     | 3.6     | 2.2     | 2.2     | 3.6     | 4       | 1.9    | 2.1     | 0.505044349 | 2.425     | 2.9      | 0.475    | 0.836206897 | 0.5257   | 1.173  |
| 95275_at   | 13.1    | 13.4    | 13.8    | 14.5    | 15.6    | 21.2    | 15.6   | 20.6    | 0.056678785 | 13.7      | 18.25    | 4.55     | 0.750684932 | 0.01897  | 1.319  |
| 95281_at   | 1.6     | 0.7     | 0.7     | 2.1     | 2.2     | 0.8     | 0.8    | 0.7     | 0.774128305 | 1.275     | 1.125    | 0.15     | 1.133333333 | 0.7268   | -1.149 |
| 95282_at   | 11133.4 | 9311.3  | 9794.8  | 8508    | 8392.6  | 8831.9  | 8411.2 | 8636    | 0.133514132 | 9686.875  | 8567.925 | 1118.95  | 1.130597548 | 0.0851   | -1.125 |
| 95283_at   | 19.5    | 34.5    | 42      | 40.1    | 21.3    | 36.7    | 49.4   | 48.2    | 0.578788357 | 34.025    | 38.9     | 4.875    | 0.874678663 | 0.6531   | 1.133  |
| 95284_at   | 33.6    | 25.1    | 17.8    | 39      | 32.6    | 41.4    | 30.5   | 25.3    | 0.559246597 | 28.875    | 32.45    | 3.575    | 0.889830508 | 0.5016   | 1.154  |
| 95285_at   | 373.8   | 352.4   | 367.9   | 327.2   | 394.3   | 363.4   | 328.9  | 315     | 0.821167278 | 355.325   | 350.4    | 4.925    | 1.014055365 | 0.7886   | -1.017 |
| 95286_at   | 11045.6 | 10256.1 | 10850   | 9206.3  | 9796.8  | 7705.2  | 8208.8 | 6714.6  | 0.032100971 | 10339.5   | 8106.35  | 2233.15  | 1.275481567 | 0.03003  | -1.284 |
| 95287_at   | 256.1   | 304.3   | 288.9   | 347.8   | 366.6   | 322.1   | 320.6  | 420     | 0.105136484 | 299.275   | 357.325  | 58.05    | 0.837542853 | 0.09721  | 1.194  |
| 95288_i_at | 334.5   | 292.5   | 339.2   | 542.7   | 270     | 323.9   | 305.6  | 379.7   | 0.397603873 | 377.225   | 319.8    | 57.425   | 1.179565353 | 0.3833   | -1.154 |
| 95289_r_at | 56.2    | 66.2    | 70.7    | 81      | 74.4    | 92.6    | 63.9   | 81.9    | 0.270213709 | 68.525    | 78.2     | 9.675    | 0.876278772 | 0.2735   | 1.141  |
| 95290_at   | 41.2    | 74.5    | 29.5    | 16.3    | 93.1    | 60.9    | 67.9   | 52.8    | 0.117721812 | 40.375    | 68.675   | 28.3     | 0.587914088 | 0.102    | 1.923  |
| 95291_r_at | 1.2     | 6.5     | 0.9     | 1.9     | 5       | 1.3     | 0.7    | 2.2     | 0.848032607 | 2.625     | 2.3      | 0.325    | 1.141304348 | 0.948    | -1.042 |
| 95292_at   | 61.5    | 70.7    | 67.2    | 117.8   | 59.1    | 74.7    | 62.9   | 87.7    | 0.599066172 | 79.3      | 71.1     | 8.2      | 1.11533052  | 0.6317   | -1.09  |
| 95293_at   | 88      | 44.2    | 15.5    | 40      | 21.7    | 17.1    | 34.1   | 26.5    | 0.240924127 | 46.925    | 24.85    | 22.075   | 1.88832998  | 0.2493   | -1.636 |
| 95294_at   | 28.9    | 109.5   | 35.4    | 138.7   | 149.5   | 40.2    | 43.9   | 39.7    | 0.807106097 | 78.125    | 68.325   | 9.8      | 1.143432126 | 0.8527   | -1.104 |
| 95295_s_at | 402.7   | 320.1   | 465.2   | 328     | 257.9   | 250.3   | 276.9  | 226.3   | 0.029524589 | 379       | 252.85   | 126.15   | 1.498912399 | 0.006886 | -1.485 |
| 95296_r_at | 272.1   | 287.8   | 297.4   | 373.7   | 391.1   | 339.4   | 345.7  | 332.5   | 0.152500492 | 307.75    | 352.175  | 44.425   | 0.873855328 | 0.1249   | 1.151  |
| 95297_at   | 2.5     | 3.4     | 4.1     | 2       | 8       | 15.5    | 12.1   | 11.7    | 0.00746199  | 3         | 11.825   | 8.825    | 0.253699789 | 0.000611 | 3.981  |
| 95298_at   | 305.5   | 190.6   | 230.6   | 360.7   | 286.3   | 391.4   | 159.6  | 283.5   | 0.895379755 | 271.85    | 280.2    | 8.35     | 0.970199857 | 0.9631   | -1.011 |
| 95299_at   | 4.8     | 3.6     | 6.8     | 7.2     | 30.4    | 6       | 10.8   | 7.2     | 0.255052539 | 5.6       | 13.6     | 8        | 0.411764706 | 0.1285   | 2.025  |
| 95300_at   | 35.6    | 34      | 12.7    | 66.2    | 54.8    | 42.8    | 13.4   | 50.8    | 0.825802763 | 37.125    | 40.45    | 3.325    | 0.917799753 | 0.8196   | 1.12   |
| 95301_at   | 18.1    | 30.2    | 49.8    | 17.4    | 111.7   | 30.4    | 54.3   | 35      | 0.224656125 | 28.875    | 57.85    | 28.975   | 0.499135696 | 0.139    | 1.922  |
| 95302_at   | 394.5   | 371.4   | 448.3   | 326.3   | 513.9   | 374     | 411.8  | 523.4   | 0.173943624 | 385.125   | 455.775  | 70.65    | 0.844989304 | 0.1712   | 1.179  |
| 95303_at   | 103.9   | 54.8    | 64.5    | 63.1    | 22.4    | 75.7    | 65     | 122.5   | 0.994325356 | 71.575    | 71.4     | 0.175    | 1.00245098  | 0.7376   | -1.145 |
| 95304_at   | 49.6    | 43.4    | 43.8    | 44.5    | 28      | 50.2    | 25.5   | 17.9    | 0.118694019 | 45.325    | 30.4     | 14.925   | 1.490953947 | 0.07286  | -1.6   |
| 95305_at   | 150.2   | 132.6   | 168.2   | 165.9   | 151.5   | 123.4   | 155.5  | 193.6   | 0.919266201 | 154.225   | 156      | 1.775    | 0.988621795 | 0.9771   | -1.003 |
| 95306_at   | 141.9   | 133.6   | 103.8   | 90.7    | 147.2   | 166.5   | 104    | 193.8   | 0.174477487 | 117.5     | 152.875  | 35.375   | 0.768601799 | 0.1834   | 1.29   |
| 95307_at   | 39.8    | 76.1    | 89.1    | 113.8   | 87.2    | 66.9    | 107.6  | 97.4    | 0.595293649 | 79.7      | 89.775   | 10.075   | 0.887774993 | 0.5126   | 1.187  |
| 95308_at   | 156.7   | 146.5   | 226.7   | 142.9   | 176.7   | 150.9   | 219.6  | 200.2   | 0.480612307 | 168.2     | 186.85   | 18.65    | 0.900187316 | 0.4311   | 1.12   |
| 95309_at   | 48.6    | 27      | 61.2    | 17.3    | 23.6    | 42.2    | 18.4   | 47.5    | 0.664938277 | 38.525    | 32.925   | 5.6      | 1.170083523 | 0.759    | -1.125 |
| 95310_at   | 1.3     | 6.2     | 1.1     | 1.9     | 2.4     | 1.2     | 2.1    | 1.6     | 0.558807234 | 2.625     | 1.825    | 0.8      | 1.438356164 | 0.7551   | -1.15  |
| 95311_at   | 20.9    | 28.1    | 26.1    | 27.2    | 32.8    | 20.4    | 32.4   | 31.3    | 0.331725247 | 25.575    | 29.225   | 3.65     | 0.875106929 | 0.3883   | 1.131  |
| 95312_at   | 59.8    | 74.6    | 77.2    | 86.8    | 41.2    | 48.3    | 39.4   | 128.1   | 0.667740461 | 74.6      | 64.25    | 10.35    | 1.161089494 | 0.3799   | -1.314 |
| 95313_at   | 450.2   | 318.8   | 335.3   | 329.7   | 187     | 383.3   | 166.3  | 276.8   | 0.130904961 | 358.5     | 253.35   | 105.15   | 1.415038484 | 0.1063   | -1.481 |
| 95314_at   | 16.9    | 21      | 21.5    | 20.2    | 13.3    | 22.3    | 16.9   | 16.2    | 0.263388934 | 19.9      | 17.175   | 2.725    | 1.158660844 | 0.2344   | -1.172 |
| 95315_at   | 55.6    | 19      | 41.8    | 33.8    | 55.9    | 29.5    | 27.8   | 51.8    | 0.738861661 | 37.55     | 41.25    | 3.7      | 0.91030303  | 0.7016   | -1.124 |
| 95316_at   | 132.7   | 156     | 145.3   | 145.2   | 147.6   | 141.5   | 132.1  | 138.3   | 0.429286994 | 144.8     | 139.875  | 4.925    | 1.035210009 | 0.4373   | -1.034 |
| 95317_at   | 24      | 28.7    | 25.5    | 36.7    | 23.4    | 57.6    | 27.1   | 26.1    | 0.604245258 | 28.725    | 33.55    | 4.825    | 0.856184799 | 0.6762   | -1.105 |
| 95318_at   | 916.7   | 864.4   | 878.7   | 911.7   | 865.4   | 854.3   | 815    | 888.7   | 0.114608611 | 892.875   | 855.85   | 37.025   | 1.043261085 | 0.1141   | -1.043 |
| 95319_at   | 29.1    | 44.3    | 32.5    | 40.5    | 103.3   | 28.1    | 68.2   | 29.5    | 0.334889693 | 36.6      | 57.275   | 20.675   | 0.639022261 | 0.3921   | 1.362  |
| 95320_at   | 8.7     | 23.9    | 6.6     | 20.6    | 31.6    | 6.5     | 12.3   | 12.6    | 0.912305193 | 14.95     | 15.75    | 0.8      | 0.949206349 | 0.9491   | -1.031 |
| 95321_at   | 29.5    | 39      | 9.1     | 6.7     | 28.3    | 11.5    | 12.7   | 11.6    | 0.59624883  | 21.075    | 16.025   | 5.05     | 1.315132605 | 0.8521   | -1.099 |
| 95322_g_at | 151.3   | 166.4   | 168     | 218.4   | 172.5   | 182.3   | 196.3  | 211.8   | 0.42637258  | 176.025   | 190.725  | 14.7     | 0.922925678 | 0.3757   | -1.09  |
| 95323_at   | 41.6    | 42.5    | 43      | 25.3    | 35.7    | 67.2    | 23.8   | 59.4    | 0.485226075 | 38.1      | 46.525   | 8.425    | 0.818914562 | 0.6173   | 1.154  |
| 95324_at   | 21.4    | 18.3    | 27.2    | 22.8    | 22.5    | 28.9    | 28.3   | 37.5    | 0.115688677 | 22.425    | 29.3     | 6.875    | 0.765358362 | 0.09794  | 1.298  |
| 95325_at   | 44.2    | 45.2    | 61.6    | 61.2    | 65.6    | 47      | 16.4   | 23.6    | 0.289126288 | 53.05     | 38.15    | 14.9     | 1.390563565 | 0.2105   | -1.587 |



|            |         |         |         |       |        |         |         |         |             |          |           |          |             |          |        |
|------------|---------|---------|---------|-------|--------|---------|---------|---------|-------------|----------|-----------|----------|-------------|----------|--------|
| 95326_at   | 152     | 206.4   | 201.7   | 310.6 | 179.6  | 239.8   | 224.8   | 331.2   | 0.590575158 | 217.675  | 243.85    | 26.175   | 0.892659422 | 0.552    | 1.13   |
| 95327_at   | 8.4     | 11.9    | 9       | 9.8   | 15.9   | 14.3    | 9.2     | 13.9    | 0.086732686 | 9.775    | 13.325    | 3.55     | 0.73358349  | 0.07717  | 1.351  |
| 95328_at   | 1.4     | 13.2    | 1.6     | 1.9   | 24.4   | 3.1     | 1.6     | 3.8     | 0.575088466 | 4.525    | 8.225     | 3.7      | 0.550151976 | 0.5183   | 1.715  |
| 95329_at   | 9.5     | 8.4     | 11.2    | 9.2   | 6.4    | 6.2     | 4.3     | 7.2     | 0.005897602 | 9.575    | 6.025     | 3.55     | 1.589211618 | 0.0102   | -1.603 |
| 95330_at   | 2       | 3.9     | 9.1     | 2.7   | 11.8   | 1.7     | 6       | 2.7     | 0.701954338 | 4.425    | 5.55      | 1.125    | 0.797297297 | 0.8176   | 1.139  |
| 95331_at   | 3.3     | 4.9     | 7.4     | 12.3  | 12.5   | 13.1    | 15.9    | 18.6    | 0.018286694 | 6.975    | 15.025    | 8.05     | 0.46422629  | 0.02658  | 2.402  |
| 95332_at   | 32.5    | 28.1    | 34.2    | 10.5  | 14.4   | 21.1    | 4.6     | 30.2    | 0.296816288 | 26.325   | 17.575    | 8.75     | 1.497866287 | 0.3368   | -1.676 |
| 95333_at   | 48.1    | 7.4     | 30.2    | 49.3  | 67.2   | 48.6    | 43.2    | 43.7    | 0.197490481 | 33.75    | 50.675    | 16.925   | 0.66600888  | 0.2285   | 1.845  |
| 95334_at   | 12.6    | 12.6    | 42.7    | 60.5  | 40.5   | 72.6    | 80.8    | 110.8   | 0.057916804 | 32.1     | 76.175    | 44.075   | 0.421398096 | 0.06414  | 2.827  |
| 95335_at   | 216.1   | 214.4   | 308.3   | 266.4 | 308.6  | 282.4   | 252.1   | 262.2   | 0.37822294  | 251.3    | 276.325   | 25.025   | 0.909436352 | 0.3332   | -1.109 |
| 95336_at   | 114.5   | 89.6    | 63      | 23.5  | 47.9   | 34.2    | 68.7    | 77.2    | 0.508652826 | 72.65    | 57        | 15.65    | 1.274561404 | 0.7353   | -1.15  |
| 95337_at   | 145.4   | 149.9   | 149.4   | 163.5 | 90     | 84.2    | 145.7   | 134.9   | 0.087008266 | 152.05   | 113.7     | 38.35    | 1.337291117 | 0.06512  | -1.375 |
| 95338_s_at | 31.7    | 21.8    | 25.9    | 36.4  | 8.5    | 35.8    | 29.9    | 27.5    | 0.624031611 | 28.95    | 25.425    | 3.525    | 1.138643068 | 0.5119   | -1.273 |
| 95339_r_at | 30.4    | 29.8    | 23      | 19.4  | 47.2   | 8.8     | 12.9    | 22.3    | 0.76951293  | 25.65    | 22.8      | 2.85     | 1.125       | 0.4525   | -1.357 |
| 95340_at   | 1628.7  | 1256.1  | 1405.6  | 1398  | 1908.1 | 1455    | 1630.6  | 1506.6  | 0.165215531 | 1422.1   | 1625.075  | 202.975  | 0.875098072 | 0.1518   | 1.141  |
| 95341_at   | 217.4   | 283.3   | 261     | 295.9 | 246.7  | 289.9   | 197.7   | 229.8   | 0.400408569 | 264.4    | 241.025   | 23.375   | 1.096981641 | 0.3979   | -1.1   |
| 95342_at   | 1.2     | 1       | 1.4     | 2     | 2.1    | 2.6     | 18.9    | 0.9     | 0.349709347 | 1.4      | 6.125     | 4.725    | 0.228571429 | 0.2564   | 2.314  |
| 95343_at   | 10.8    | 9.5     | 16.8    | 15.6  | 7.9    | 12      | 29.3    | 33.4    | 0.325425083 | 13.175   | 20.65     | 7.475    | 0.638014528 | 0.444    | 1.36   |
| 95344_at   | 10.8    | 3.8     | 24      | 13.7  | 46.9   | 22.2    | 31.2    | 5.1     | 0.237468124 | 13.075   | 26.35     | 13.275   | 0.496204934 | 0.3522   | 1.868  |
| 95345_at   | 168     | 131.6   | 102.1   | 105.4 | 125.2  | 269.2   | 157.1   | 191.9   | 0.155765188 | 126.775  | 185.85    | 59.075   | 0.682136131 | 0.1184   | 1.437  |
| 95346_at   | 70.5    | 46      | 51.8    | 74.2  | 46.3   | 71.7    | 31.2    | 94.8    | 0.981922882 | 60.625   | 61        | 0.375    | 0.993852459 | 0.8335   | -1.061 |
| 95347_at   | 9.9     | 11      | 14.5    | 15.8  | 27.3   | 18.3    | 16.2    | 24.7    | 0.034512835 | 12.8     | 21.625    | 8.825    | 0.591907514 | 0.01998  | 1.683  |
| 95348_at   | 9       | 45      | 36.4    | 9     | 21.1   | 32.3    | 63.1    | 70.1    | 0.200485831 | 24.85    | 46.65     | 21.8     | 0.532690247 | 0.1846   | 2.183  |
| 95349_g_at | 7.5     | 46.5    | 9.9     | 57.7  | 55     | 28.1    | 26.7    | 22.3    | 0.865990386 | 30.4     | 33.025    | 2.625    | 0.920514762 | 0.5187   | 1.467  |
| 95350_at   | 46.4    | 62.8    | 76.9    | 53.2  | 22.6   | 42.8    | 72.7    | 46      | 0.309319971 | 59.825   | 46.025    | 13.8     | 1.299837045 | 0.262    | -1.386 |
| 95351_at   | 107.1   | 140.3   | 126.7   | 60.8  | 98.6   | 115.6   | 70.6    | 83.2    | 0.441333262 | 108.725  | 92        | 16.725   | 1.181793478 | 0.5466   | -1.147 |
| 95352_at   | 10.1    | 2.2     | 1.6     | 6     | 5      | 10.8    | 3.2     | 3.7     | 0.79932178  | 4.975    | 5.675     | 0.7      | 0.876651982 | 0.5958   | 1.328  |
| 95353_at   | 1.9     | 6.2     | 1.4     | 4.1   | 2      | 3.9     | 1.6     | 4.6     | 0.78731894  | 3.4      | 3.025     | 0.375    | 1.123966942 | 0.9537   | -1.026 |
| 95354_at   | 2.2     | 2.7     | 9.2     | 18.9  | 3.5    | 23.4    | 3.9     | 28.8    | 0.424113564 | 8.25     | 14.9      | 6.65     | 0.553691275 | 0.5012   | 1.725  |
| 95355_at   | 325.2   | 350.5   | 381.7   | 412.6 | 269.1  | 241.8   | 231.7   | 286     | 0.004192686 | 367.5    | 257.15    | 110.35   | 1.429126969 | 0.002343 | -1.429 |
| 95356_at   | 3284.3  | 2537    | 2744    | 2453  | 3397.7 | 3153.9  | 2739.9  | 3504.3  | 0.129252624 | 2754.575 | 3198.95   | 444.375  | 0.861087232 | 0.1252   | 1.164  |
| 95357_at   | 260.3   | 189.9   | 227.1   | 209.1 | 128.5  | 225.4   | 118.9   | 118.9   | 0.059200096 | 221.6    | 147.925   | 73.675   | 1.498056448 | 0.04095  | -1.547 |
| 95358_at   | 126.4   | 149.2   | 153.3   | 213.7 | 128.9  | 172.3   | 184.8   | 204     | 0.646482037 | 160.65   | 172.5     | 11.85    | 0.931304348 | 0.6256   | -1.079 |
| 95359_at   | 15233.9 | 15301.1 | 13847.6 | 13366 | 19382  | 12719.9 | 16369.5 | 15825.1 | 0.325662027 | 14437.15 | 16074.125 | 1636.975 | 0.898160864 | 0.3323   | -1.103 |
| 95360_at   | 86.4    | 82      | 64.5    | 97.3  | 67     | 82.1    | 68.2    | 79.1    | 0.331800785 | 82.55    | 74.1      | 8.45     | 1.114035088 | 0.3542   | -1.106 |
| 95363_at   | 23.9    | 56.1    | 20.1    | 17.4  | 35.5   | 28.6    | 9.8     | 44.8    | 0.980344146 | 29.375   | 29.675    | 0.3      | 0.98989048  | 0.9738   | -1.015 |
| 95364_at   | 294.4   | 168.1   | 210.7   | 227.4 | 121.2  | 157.4   | 125.7   | 135.9   | 0.036119725 | 225.15   | 135.05    | 90.1     | 1.667160311 | 0.008566 | -1.643 |
| 95366_at   | 58.4    | 59.6    | 52      | 77.6  | 92.4   | 63.5    | 80.9    | 52.7    | 0.360566325 | 61.9     | 72.375    | 10.475   | 0.855267703 | 0.3749   | 1.156  |
| 95368_at   | 36.8    | 56.7    | 43.2    | 68.7  | 76.2   | 90.1    | 30.3    | 72.1    | 0.334552646 | 51.35    | 67.175    | 15.825   | 0.764421288 | 0.4608   | 1.248  |
| 95369_at   | 37.4    | 31.2    | 36.8    | 19.2  | 40.8   | 20      | 16.1    | 25.2    | 0.446093031 | 31.15    | 25.525    | 5.625    | 1.220372184 | 0.401    | -1.257 |
| 95370_at   | 2       | 7.8     | 3.7     | 2.9   | 2      | 4.3     | 5.4     | 3.9     | 0.897022247 | 4.1      | 3.9       | 0.2      | 1.051282051 | 0.9906   | -1.004 |
| 95371_g_at | 18.1    | 10.7    | 14.3    | 22.5  | 18.3   | 10.4    | 23.1    | 11      | 0.865880683 | 16.4     | 15.7      | 0.7      | 1.044585987 | 0.8105   | -1.065 |
| 95372_at   | 7.3     | 31.7    | 35.4    | 12    | 59.5   | 8.3     | 11.1    | 29.9    | 0.700255459 | 21.6     | 27.2      | 5.6      | 0.794117647 | 0.8329   | 1.14   |
| 95373_at   | 12.9    | 11.8    | 24.3    | 7.8   | 12     | 16.8    | 19.6    | 31.4    | 0.331880773 | 14.2     | 19.95     | 5.75     | 0.711779449 | 0.2844   | 1.436  |
| 95374_f_at | 645.6   | 672.4   | 746.7   | 603.6 | 731.5  | 738.8   | 741.2   | 698.4   | 0.136123263 | 667.075  | 727.475   | 60.4     | 0.916973092 | 0.1037   | -1.094 |
| 95375_r_at | 56.3    | 61.3    | 48.1    | 68.8  | 49.6   | 77.4    | 76.4    | 66.3    | 0.306798012 | 58.625   | 67.425    | 8.8      | 0.869484613 | 0.3364   | 1.143  |
| 95376_at   | 39.6    | 35.4    | 29.5    | 25.8  | 50.3   | 28.2    | 28.6    | 48.5    | 0.400303138 | 32.575   | 38.9      | 6.325    | 0.837403599 | 0.4443   | 1.164  |
| 95377_at   | 326.1   | 523.4   | 427.7   | 360.4 | 420.5  | 293.6   | 360.3   | 372.8   | 0.39186697  | 409.4    | 361.8     | 47.6     | 1.1315644   | 0.4015   | -1.122 |
| 95378_at   | 194.4   | 202.3   | 188.7   | 169.6 | 250.5  | 226     | 201.5   | 179     | 0.20357394  | 188.75   | 214.25    | 25.5     | 0.880980163 | 0.1891   | 1.129  |
| 95379_at   | 38      | 41.3    | 32.3    | 34    | 35.5   | 39.2    | 40.2    | 64.3    | 0.296844144 | 36.4     | 44.8      | 8.4      | 0.8125      | 0.245    | 1.203  |
| 95380_at   | 26.7    | 30.5    | 57.9    | 48.5  | 66.8   | 24.7    | 43.5    | 33.7    | 0.916894657 | 40.9     | 42.175    | 1.275    | 0.96976882  | 0.9605   | -1.015 |
| 95381_at   | 124.6   | 139.8   | 152.8   | 198.6 | 165    | 176.7   | 135.2   | 146.1   | 0.926304382 | 153.95   | 155.75    | 1.8      | 0.988443018 | 0.8609   | -1.021 |
| 95382_at   | 31.5    | 31      | 60.5    | 39.2  | 25.9   | 29.7    | 32.9    | 52.1    | 0.572694478 | 40.55    | 35.15     | 5.4      | 1.153627312 | 0.5445   | -1.15  |
| 95383_at   | 304.7   | 305.4   | 347.7   | 254.7 | 357.6  | 315.8   | 300.9   | 245.1   | 0.956141415 | 303.125  | 304.85    | 1.725    | 0.994341479 | 0.9805   | -1.003 |
| 95385_at   | 322.8   | 289.8   | 330.6   | 336.4 | 446.8  | 423.8   | 407.8   | 493.2   | 0.002652518 | 319.9    | 442.9     | 123      | 0.72228494  | 0.000879 | 1.383  |
| 95386_at   | 670.2   | 581.3   | 587.9   | 503.5 | 791.8  | 702.5   | 693     | 446.7   | 0.419849357 | 585.725  | 658.5     | 72.775   | 0.889483675 | 0.4969   | 1.105  |



|            |        |        |        |        |        |        |        |        |             |          |          |         |             |         |        |
|------------|--------|--------|--------|--------|--------|--------|--------|--------|-------------|----------|----------|---------|-------------|---------|--------|
| 95387_f_at | 180.6  | 576.7  | 391.9  | 615.2  | 754.4  | 455.9  | 506.8  | 482.1  | 0.408168711 | 441.1    | 549.8    | 108.7   | 0.802291742 | 0.3589  | 1.352  |
| 95388_at   | 6.3    | 3.4    | 4.8    | 3.7    | 5.2    | 2.3    | 6.4    | 4.9    | 0.894817823 | 4.55     | 4.7      | 0.15    | 0.968085106 | 0.9801  | -1.007 |
| 95389_at   | 65     | 48.5   | 53.9   | 20.5   | 15     | 13.3   | 5.2    | 15.7   | 0.031313962 | 46.975   | 12.3     | 34.675  | 3.819105691 | 0.01057 | -3.828 |
| 95390_at   | 5.8    | 8      | 4.9    | 5.8    | 6.9    | 8.8    | 5.1    | 6.8    | 0.469828724 | 6.125    | 6.9      | 0.775   | 0.887681159 | 0.4651  | 1.126  |
| 95391_at   | 172.5  | 92.2   | 177    | 152.3  | 176    | 124.7  | 173.8  | 165.8  | 0.63494386  | 148.5    | 160.075  | 11.575  | 0.927690145 | 0.5936  | -1.102 |
| 95392_at   | 9.9    | 23.1   | 43.1   | 40.4   | 29.3   | 39.2   | 19.6   | 60.1   | 0.522001238 | 29.125   | 37.05    | 7.925   | 0.786099865 | 0.4883  | 1.357  |
| 95393_at   | 387.7  | 351.6  | 376.9  | 339.1  | 218.4  | 419.4  | 198.5  | 365.1  | 0.329827448 | 363.825  | 300.35   | 63.475  | 1.211336774 | 0.2465  | -1.273 |
| 95395_at   | 490.1  | 374.7  | 368.9  | 599.8  | 361.1  | 411.5  | 419.2  | 569.6  | 0.808053918 | 458.375  | 440.35   | 18.025  | 1.040933348 | 0.83    | -1.035 |
| 95396_at   | 0.3    | 8      | 0.3    | 5.9    | 6      | 4.6    | 0.6    | 4.7    | 0.88455187  | 3.625    | 3.975    | 0.35    | 0.911949686 | 0.5171  | 2.072  |
| 95397_at   | 580.8  | 744.8  | 599.9  | 670.6  | 660.9  | 851.1  | 863.1  | 508.4  | 0.479371057 | 649.025  | 720.875  | 71.85   | 0.900329461 | 0.5476  | -1.091 |
| 95398_at   | 115.2  | 68.2   | 47     | 80.4   | 100.7  | 59.2   | 102.9  | 124.4  | 0.370614615 | 77.7     | 96.8     | 19.1    | 0.80268595  | 0.3733  | 1.266  |
| 95399_at   | 7.4    | 9.9    | 16.6   | 7.8    | 4.3    | 7.5    | 11.3   | 8.1    | 0.351387397 | 10.425   | 7.8      | 2.625   | 1.336538462 | 0.3287  | -1.339 |
| 95400_i_at | 637.8  | 681.5  | 783    | 777.3  | 789.2  | 739.3  | 812.3  | 820.6  | 0.148063155 | 719.9    | 790.35   | 70.45   | 0.910862276 | 0.1341  | -1.101 |
| 95401_at   | 644.2  | 911.1  | 989.2  | 905.7  | 687.1  | 996.3  | 829    | 860.2  | 0.850422997 | 862.55   | 843.15   | 19.4    | 1.023008955 | 0.8842  | -1.019 |
| 95404_at   | 1862.1 | 1295.5 | 1807.8 | 1569.9 | 869.9  | 1636.3 | 1503.8 | 1349.8 | 0.216963359 | 1633.825 | 1339.95  | 293.875 | 1.219317885 | 0.2343  | -1.241 |
| 95405_at   | 3263.6 | 2519   | 2901.7 | 2543.1 | 2393.9 | 3012.9 | 2722.3 | 2616.3 | 0.601571962 | 2806.85  | 2686.35  | 120.5   | 1.044856404 | 0.6116  | -1.042 |
| 95406_at   | 5364.2 | 5041   | 5737.9 | 4197.5 | 6129.1 | 4212.4 | 4812   | 3749.4 | 0.581811455 | 5085.15  | 4725.725 | 359.425 | 1.076057113 | 0.5276  | -1.087 |
| 95407_at   | 1.7    | 10.4   | 7.5    | 11     | 28     | 18.9   | 4.8    | 12.8   | 0.186142687 | 7.65     | 16.125   | 8.475   | 0.474418605 | 0.2316  | 2.163  |
| 95408_at   | 2293.6 | 1807.7 | 1643.6 | 2187.5 | 2299   | 1835   | 1764.3 | 2051.6 | 0.98290821  | 1983.1   | 1987.475 | 4.375   | 0.997798714 | 0.9537  | -1.006 |
| 95409_at   | 1742.2 | 1535.1 | 1521   | 1418.7 | 2072.8 | 1359.5 | 1597.4 | 1397.4 | 0.78184629  | 1554.25  | 1606.775 | 52.525  | 0.967310295 | 0.8452  | -1.022 |
| 95410_s_at | 37.5   | 35.5   | 36.2   | 69     | 65.5   | 16.5   | 35.6   | 70     | 0.882157296 | 44.55    | 46.9     | 2.35    | 0.94989339  | 0.8917  | -1.054 |
| 95411_at   | 3018.8 | 2487   | 2506.9 | 2537.1 | 2785.9 | 2581.5 | 2469.3 | 2819.5 | 0.868117186 | 2637.45  | 2664.05  | 26.6    | 0.990015202 | 0.8398  | -1.012 |
| 95412_at   | 1533.1 | 1083.2 | 1212.4 | 1346.6 | 1267.7 | 1343.2 | 1308.8 | 1345.5 | 0.832270505 | 1293.825 | 1316.3   | 22.475  | 0.982925625 | 0.7498  | -1.026 |
| 95413_at   | 3023.9 | 2446.2 | 2592.5 | 2424.5 | 3056.9 | 2672.6 | 2593.4 | 2651.6 | 0.51356204  | 2621.775 | 2743.625 | 121.85  | 0.955587954 | 0.483   | -1.048 |
| 95414_i_at | 351    | 407.2  | 489.7  | 400.1  | 553.3  | 545.5  | 556.9  | 450.8  | 0.024831706 | 412      | 526.625  | 114.625 | 0.782340375 | 0.0267  | 1.282  |
| 95415_f_at | 621.3  | 667.8  | 675.3  | 672.2  | 666.1  | 616.7  | 664.4  | 756.5  | 0.62556493  | 659.15   | 675.925  | 16.775  | 0.975182158 | 0.6412  | -1.023 |
| 95416_at   | 683    | 364.8  | 512.3  | 620.3  | 448.2  | 531.5  | 396.1  | 553.7  | 0.465168156 | 545.1    | 482.375  | 62.725  | 1.130033687 | 0.5369  | -1.11  |
| 95417_at   | 308.6  | 385    | 296.3  | 399.1  | 338.8  | 336.2  | 291    | 318    | 0.406832904 | 347.25   | 321      | 26.25   | 1.081775701 | 0.422   | -1.075 |
| 95418_at   | 665    | 564.3  | 732.7  | 935.4  | 425.5  | 701.8  | 543.8  | 775.8  | 0.349773203 | 724.35   | 611.725  | 112.625 | 1.184110507 | 0.3377  | -1.195 |
| 95419_at   | 3780.4 | 5157.9 | 5007.6 | 4163   | 3720.7 | 5000.6 | 4228.7 | 4733.6 | 0.815607519 | 4527.225 | 4420.9   | 106.325 | 1.024050533 | 0.8325  | -1.022 |
| 95420_at   | 1062.5 | 997.4  | 1085.6 | 1021.3 | 922.2  | 1109.8 | 820.4  | 977.7  | 0.261956403 | 1041.7   | 957.525  | 84.175  | 1.087908932 | 0.2211  | -1.094 |
| 95423_at   | 917.8  | 999.5  | 1052.1 | 1140.6 | 1195.3 | 762.4  | 874.4  | 1356.7 | 0.899549836 | 1027.5   | 1047.2   | 19.7    | 0.98118793  | 0.9753  | -1.005 |
| 95424_at   | 7836.8 | 7422.7 | 8361.1 | 7235.9 | 6589.3 | 7305.1 | 7550.1 | 8764.5 | 0.767617612 | 7714.125 | 7552.25  | 161.875 | 1.02143401  | 0.7228  | -1.025 |
| 95425_at   | 426.6  | 533.4  | 308    | 410.3  | 531.1  | 342.2  | 502.2  | 342.3  | 0.890198517 | 419.575  | 429.45   | 9.875   | 0.977005472 | 0.9037  | -1.021 |
| 95426_at   | 2053.2 | 1840.2 | 1947   | 1587.2 | 2193.8 | 1936.5 | 2243.8 | 1851.7 | 0.199593122 | 1856.9   | 2056.45  | 199.55  | 0.902963845 | 0.2047  | -1.109 |
| 95427_at   | 1438.3 | 1498.7 | 1592   | 1542.3 | 1450.3 | 1288.7 | 1445.8 | 1293.3 | 0.041523176 | 1517.825 | 1369.525 | 148.3   | 1.10828572  | 0.03935 | -1.109 |
| 95428_at   | 352.3  | 346.6  | 377.3  | 448.3  | 384.5  | 392.1  | 414.5  | 487.9  | 0.28887576  | 381.125  | 419.75   | 38.625  | 0.907980941 | 0.2692  | -1.102 |
| 95430_f_at | 1499.6 | 1883.7 | 1713   | 2387.9 | 1399.3 | 1869.7 | 1553.9 | 1906.9 | 0.440761222 | 1871.05  | 1682.45  | 188.6   | 1.112098428 | 0.4491  | -1.105 |
| 95431_at   | 413.1  | 407.6  | 435.5  | 397.3  | 323.9  | 374    | 339.1  | 398.3  | 0.039345874 | 413.375  | 358.825  | 54.55   | 1.152023967 | 0.02927 | -1.155 |
| 95432_f_at | 1172.1 | 1041.9 | 1054.2 | 1020.5 | 1068.6 | 1077.9 | 1048.8 | 1070.9 | 0.880564798 | 1072.175 | 1066.55  | 5.625   | 1.005274014 | 0.9063  | -1.004 |
| 95433_at   | 186.4  | 410    | 366.8  | 343.1  | 461.4  | 335.6  | 432.7  | 398.3  | 0.21240655  | 326.575  | 407      | 80.425  | 0.802395577 | 0.2273  | 1.291  |
| 95434_at   | 2522.4 | 2075.3 | 2431.5 | 2183.1 | 2470.3 | 2072.6 | 1938.3 | 1736.1 | 0.237892749 | 2303.075 | 2054.325 | 248.75  | 1.121086001 | 0.2176  | -1.127 |
| 95435_at   | 239.2  | 209.9  | 269.1  | 222.2  | 191.8  | 259.2  | 240.2  | 257.3  | 0.923817449 | 235.1    | 237.125  | 2.025   | 0.9914602   | 0.9498  | -1.006 |
| 95436_at   | 21.3   | 28     | 17.9   | 26     | 23.9   | 28.5   | 26.4   | 30.6   | 0.192810164 | 23.3     | 27.35    | 4.05    | 0.851919561 | 0.1861  | 1.186  |
| 95437_at   | 492.9  | 525.8  | 554.5  | 447.9  | 447    | 525.8  | 494.8  | 391.7  | 0.320447987 | 505.275  | 464.825  | 40.45   | 1.087021998 | 0.3164  | -1.09  |
| 95438_at   | 482.8  | 484    | 508.6  | 493.1  | 359.6  | 483.7  | 421.5  | 429.2  | 0.070288629 | 492.125  | 423.5    | 68.625  | 1.162042503 | 0.04633 | -1.168 |
| 95439_at   | 7.4    | 1.9    | 2.9    | 3.7    | 3.4    | 2.3    | 2.1    | 2.8    | 0.35417461  | 3.975    | 2.65     | 1.325   | 1.5         | 0.383   | -1.334 |
| 95440_at   | 308    | 325.7  | 345.7  | 276.5  | 269.7  | 336.5  | 262.3  | 282.9  | 0.286179914 | 313.975  | 287.85   | 26.125  | 1.090759076 | 0.2735  | -1.092 |
| 95441_at   | 4109.9 | 2956.6 | 3266.3 | 3447.1 | 2712.3 | 3125   | 2841.1 | 3086   | 0.128534953 | 3444.975 | 2941.1   | 503.875 | 1.171321954 | 0.09428 | -1.165 |
| 95442_at   | 1608.2 | 1305.6 | 1442   | 1238.8 | 1662.2 | 1377.5 | 1655.7 | 1337.3 | 0.395410097 | 1398.65  | 1508.175 | 109.525 | 0.927379117 | 0.3933  | -1.078 |
| 95444_at   | 1603.9 | 1133.7 | 1430   | 1283.3 | 1159.2 | 1325.6 | 1264.9 | 1355.5 | 0.473490895 | 1362.725 | 1276.3   | 86.425  | 1.067715271 | 0.4975  | -1.061 |
| 95445_at   | 1014   | 1046.6 | 836    | 1024   | 802.9  | 923.9  | 981.5  | 891.6  | 0.241238737 | 980.15   | 899.975  | 80.175  | 1.089085808 | 0.2565  | -1.088 |
| 95446_at   | 4697.1 | 3628   | 3888.7 | 3960.4 | 3567.3 | 3870.3 | 3906.7 | 3526.8 | 0.26080462  | 4043.55  | 3717.775 | 325.775 | 1.087626336 | 0.2351  | -1.084 |
| 95447_at   | 1136   | 982.3  | 1036   | 977.1  | 1313   | 961.4  | 952.7  | 981.4  | 0.848466262 | 1032.85  | 1052.125 | 19.275  | 0.981679933 | 0.9019  | -1.011 |
| 95448_at   | 3257.1 | 2849   | 3133.1 | 3107.5 | 3417.2 | 2550.7 | 2992.3 | 3031.5 | 0.673788822 | 3086.675 | 2997.925 | 88.75   | 1.029603809 | 0.633   | -1.034 |
| 95449_at   | 791.6  | 841.1  | 860.3  | 850.9  | 646.4  | 798.1  | 799.7  | 935.3  | 0.543244553 | 835.975  | 794.875  | 41.1    | 1.051706243 | 0.4824  | -1.06  |



|            |        |        |        |        |        |        |        |        |             |          |          |         |             |         |        |
|------------|--------|--------|--------|--------|--------|--------|--------|--------|-------------|----------|----------|---------|-------------|---------|--------|
| 95450_at   | 22.4   | 11.7   | 26.2   | 7.5    | 3.4    | 9.8    | 7.7    | 5.9    | 0.098113442 | 16.95    | 6.7      | 10.25   | 2.529850746 | 0.0541  | -2.415 |
| 95451_at   | 1221.6 | 1112.3 | 1119.2 | 1257.9 | 1032.1 | 1321   | 1306.3 | 1330.1 | 0.432218285 | 1177.75  | 1247.375 | 69.625  | 0.944182784 | 0.4671  | -1.055 |
| 95452_i_at | 16.1   | 18.2   | 7.3    | 35.5   | 5.5    | 19.4   | 4.1    | 7.5    | 0.200443248 | 19.275   | 9.125    | 10.15   | 2.112328767 | 0.1457  | -2.182 |
| 95453_f_at | 312.7  | 324.4  | 264.8  | 250.4  | 444.6  | 297.1  | 363    | 327    | 0.117888034 | 288.075  | 357.925  | 69.85   | 0.804847384 | 0.09496 | 1.236  |
| 95454_at   | 14.9   | 15.3   | 8.3    | 16.5   | 15.7   | 12.4   | 15.9   | 12.3   | 0.883551545 | 13.75    | 14.075   | 0.325   | 0.976909414 | 0.7906  | -1.05  |
| 95455_at   | 16.8   | 7.4    | 11     | 7.8    | 16.2   | 16     | 7.7    | 7.1    | 0.77380735  | 10.75    | 11.75    | 1       | 0.914893617 | 0.8209  | -1.072 |
| 95456_r_at | 5624.3 | 4278.7 | 4695.2 | 4647.3 | 4727.8 | 4423.9 | 5060.9 | 4597.7 | 0.747377236 | 4811.375 | 4702.575 | 108.8   | 1.02313626  | 0.777   | -1.019 |
| 95457_at   | 1566.7 | 1355.9 | 1540.1 | 1610.1 | 994.9  | 1259.1 | 1296.4 | 1445.1 | 0.057724039 | 1518.2   | 1248.875 | 269.325 | 1.215654089 | 0.05996 | -1.224 |
| 95458_s_at | 1994.5 | 1959.9 | 1845.1 | 2348.3 | 1647.8 | 2078.5 | 1672.2 | 2372.9 | 0.665634503 | 2036.95  | 1942.85  | 94.1    | 1.048434002 | 0.6097  | -1.057 |
| 95460_at   | 2346.2 | 1745.2 | 2057.4 | 1973.1 | 1959.5 | 1894   | 1735.3 | 1638.3 | 0.183138632 | 2030.475 | 1806.775 | 223.7   | 1.123811764 | 0.1724  | -1.12  |
| 95462_at   | 2140   | 2011.8 | 1531   | 1671.2 | 2023   | 2039.9 | 1817.2 | 2236.5 | 0.304100769 | 1838.5   | 2029.15  | 190.65  | 0.906044403 | 0.2825  | 1.111  |
| 95464_at   | 9.4    | 7.6    | 27.5   | 10.7   | 12.6   | 5.8    | 12.2   | 5.7    | 0.397599987 | 13.8     | 9.075    | 4.725   | 1.520661157 | 0.3652  | -1.424 |
| 95465_s_at | 257.4  | 209.3  | 233.4  | 156.4  | 165    | 183.6  | 163.7  | 193    | 0.178838536 | 214.125  | 176.325  | 37.8    | 1.214376861 | 0.1686  | -1.197 |
| 95466_at   | 111.3  | 129.9  | 80.2   | 138.9  | 94.8   | 118.9  | 141    | 99.9   | 0.934807959 | 115.075  | 113.65   | 1.425   | 1.012538495 | 0.9833  | -1.003 |
| 95467_at   | 678.5  | 450.2  | 519.5  | 602.9  | 502.1  | 514.7  | 507.6  | 600.4  | 0.593500782 | 562.775  | 531.2    | 31.575  | 1.059440889 | 0.639   | -1.05  |
| 95468_at   | 597.6  | 779.9  | 700.2  | 747.8  | 473.5  | 800.7  | 654.8  | 728.2  | 0.625561891 | 706.375  | 664.3    | 42.075  | 1.063337348 | 0.5803  | -1.078 |
| 95469_at   | 402.4  | 410.8  | 358.9  | 424    | 410    | 409.9  | 426.7  | 557    | 0.248178252 | 399.025  | 450.9    | 51.875  | 0.884952318 | 0.2102  | 1.122  |
| 95470_at   | 1212   | 987.2  | 1024   | 982.6  | 913.4  | 1091.5 | 931    | 813    | 0.199406959 | 1051.45  | 937.225  | 114.225 | 1.12187575  | 0.186   | -1.124 |
| 95471_at   | 1580.2 | 2018.2 | 1499.7 | 1589.6 | 2189.7 | 2360.1 | 1948.5 | 1895.8 | 0.036988955 | 1671.925 | 2098.525 | 426.6   | 0.796714359 | 0.03338 | 1.259  |
| 95472_f_at | 3814   | 2814.2 | 3199.4 | 3160.6 | 2780.7 | 3110.3 | 2822.9 | 2545.4 | 0.132762946 | 3247.05  | 2814.825 | 432.225 | 1.153553063 | 0.1121  | -1.15  |
| 95473_s_at | 3705.4 | 3283.8 | 3773.5 | 3013.7 | 5301.4 | 2960   | 3957.1 | 3098.6 | 0.537577711 | 3444.1   | 3829.275 | 385.175 | 0.899413074 | 0.5878  | -1.086 |
| 95474_at   | 1864.4 | 1655.7 | 1544.1 | 1625.1 | 1483.7 | 1628.7 | 1601.5 | 1525.7 | 0.207258869 | 1672.325 | 1559.9   | 112.425 | 1.072071928 | 0.1847  | -1.07  |
| 95477_at   | 1454.7 | 1764.5 | 1706   | 2152.7 | 1424.1 | 2050.8 | 1684.9 | 1929.2 | 0.98939195  | 1769.475 | 1772.25  | 2.775   | 0.998434194 | 0.9883  | -1.002 |
| 95478_at   | 624.2  | 632.1  | 628.5  | 516.8  | 1081.3 | 585.2  | 673.7  | 554.4  | 0.390618677 | 600.4    | 723.65   | 123.25  | 0.829682858 | 0.3746  | 1.165  |
| 95479_at   | 642    | 428    | 443.2  | 816.7  | 353.2  | 414    | 412.5  | 796.2  | 0.542964117 | 582.475  | 493.975  | 88.5    | 1.179158864 | 0.4736  | -1.2   |
| 95480_at   | 761.3  | 562.6  | 481.3  | 509.7  | 615.6  | 792.1  | 566.3  | 651.5  | 0.369480729 | 578.725  | 656.375  | 77.65   | 0.881698724 | 0.3218  | 1.144  |
| 95481_at   | 141.6  | 185.1  | 163.2  | 168.1  | 145.9  | 159.6  | 198.6  | 127    | 0.718654143 | 164.5    | 157.775  | 6.725   | 1.04262399  | 0.6585  | -1.052 |
| 95482_at   | 847.6  | 890.1  | 979.8  | 1067.4 | 908.3  | 911.8  | 1031.2 | 1160.8 | 0.491131357 | 946.225  | 1003.025 | 56.8    | 0.943371302 | 0.4905  | -1.059 |
| 95483_at   | 2329.7 | 1876.7 | 2170.3 | 2249   | 1881.4 | 2048.9 | 1776.2 | 1885.6 | 0.074781649 | 2156.425 | 1898.025 | 258.4   | 1.136141516 | 0.06537 | -1.134 |
| 95485_at   | 2574.6 | 3017.8 | 3433.8 | 2618.5 | 2998.6 | 2297.7 | 2715.1 | 2427.2 | 0.283241042 | 2911.175 | 2609.65  | 301.525 | 1.115542314 | 0.2757  | -1.114 |
| 95486_at   | 640.3  | 850.4  | 598.4  | 1046.9 | 677.1  | 674.5  | 588.8  | 1149.1 | 0.945898354 | 784      | 772.375  | 11.625  | 1.015050979 | 0.9041  | -1.025 |
| 95488_at   | 1130.6 | 1877   | 1470.7 | 1631.2 | 970.7  | 1651.9 | 1219   | 1257.7 | 0.275932494 | 1527.375 | 1274.825 | 252.55  | 1.198105622 | 0.2784  | -1.2   |
| 95489_at   | 575.7  | 635.4  | 485.3  | 561.8  | 654.1  | 604.9  | 673.6  | 569.4  | 0.171295133 | 564.55   | 625.5    | 60.95   | 0.902557954 | 0.1707  | 1.111  |
| 95490_at   | 1951.4 | 2629.1 | 2201.6 | 2514.3 | 2515.5 | 2663.7 | 2462.3 | 2440.9 | 0.297031594 | 2324.1   | 2520.6   | 196.5   | 0.922042371 | 0.2608  | -1.091 |
| 95491_at   | 3704   | 4108.9 | 3178.4 | 3573.2 | 5459.8 | 3286.2 | 4195.8 | 4197.1 | 0.254918683 | 3641.125 | 4284.725 | 643.6   | 0.849791994 | 0.2428  | 1.163  |
| 95493_at   | 6659.3 | 8042.3 | 7149.7 | 6700.7 | 6712.5 | 7992.8 | 7910   | 8176.5 | 0.271877194 | 7138     | 7697.95  | 559.95  | 0.927259855 | 0.2759  | -1.078 |
| 95496_at   | 1185.8 | 1671.8 | 1323.9 | 1486.9 | 1395.5 | 1413.4 | 1533.8 | 1514   | 0.693988456 | 1417.1   | 1464.175 | 47.075  | 0.967848789 | 0.6253  | -1.041 |
| 95497_at   | 786.1  | 738.2  | 816.7  | 560.4  | 619.8  | 607.1  | 574    | 454.2  | 0.063329364 | 725.35   | 563.775  | 161.575 | 1.286594829 | 0.06626 | -1.283 |
| 95498_at   | 493.3  | 480.8  | 472.9  | 383.7  | 513.1  | 405.3  | 399.8  | 352.3  | 0.382214125 | 457.675  | 417.625  | 40.05   | 1.095899431 | 0.3614  | -1.101 |
| 95501_at   | 431.1  | 381.6  | 346.1  | 381    | 321.9  | 413.8  | 353.4  | 339.8  | 0.336570163 | 384.95   | 357.225  | 27.725  | 1.077612149 | 0.3197  | -1.079 |
| 95502_at   | 776.8  | 780    | 810.1  | 704.9  | 814.1  | 915.6  | 729.3  | 691.2  | 0.737035927 | 767.95   | 787.55   | 19.6    | 0.975112691 | 0.7753  | -1.021 |
| 95503_at   | 78.4   | 45.3   | 75.1   | 129.3  | 85.2   | 73.2   | 52.1   | 68.9   | 0.551832638 | 82.025   | 69.85    | 12.175  | 1.174302076 | 0.6643  | -1.115 |
| 95505_at   | 315.8  | 252.2  | 275.2  | 271.1  | 234.1  | 268.3  | 277.8  | 334.5  | 0.996931124 | 278.575  | 278.675  | 0.1     | 0.999641159 | 0.9596  | -1.005 |
| 95506_at   | 149.3  | 310.4  | 198.9  | 169.8  | 47.8   | 225.5  | 205.1  | 128    | 0.345074762 | 207.1    | 151.6    | 55.5    | 1.366094987 | 0.3141  | -1.534 |
| 95507_at   | 1320.8 | 926.3  | 1280.4 | 1115.4 | 744.6  | 1181.3 | 1077.7 | 1072.8 | 0.320210924 | 1160.725 | 1019.1   | 141.625 | 1.13897066  | 0.3389  | -1.145 |
| 95508_at   | 2616.9 | 3103.5 | 2941.5 | 2582.8 | 2560.9 | 2599.3 | 2906.7 | 2813.9 | 0.57373656  | 2811.175 | 2720.2   | 90.975  | 1.033444232 | 0.5851  | -1.032 |
| 95509_at   | 8.8    | 20.3   | 7.7    | 20.4   | 7.5    | 9.7    | 15.3   | 34.6   | 0.741915318 | 14.3     | 16.775   | 2.475   | 0.852459016 | 0.8608  | -1.081 |
| 95511_at   | 263.7  | 396.9  | 324.9  | 386    | 413.9  | 348.3  | 428.3  | 421.7  | 0.155619616 | 342.875  | 403.05   | 60.175  | 0.850700906 | 0.1567  | 1.187  |
| 95512_at   | 571.9  | 392.8  | 527.7  | 588.8  | 349.7  | 426.9  | 427.2  | 442.9  | 0.087103725 | 520.3    | 411.675  | 108.625 | 1.263861055 | 0.07906 | -1.254 |
| 95513_at   | 601.9  | 421.9  | 547.5  | 503.7  | 503.5  | 581.6  | 642.8  | 469.1  | 0.596097717 | 518.75   | 549.25   | 30.5    | 0.944469731 | 0.5955  | -1.06  |
| 95514_at   | 434.1  | 706.3  | 560.4  | 547.3  | 428.6  | 477.1  | 488.2  | 520.5  | 0.235844564 | 562.025  | 478.6    | 83.425  | 1.174310489 | 0.2164  | -1.16  |
| 95516_at   | 2812.7 | 1835.1 | 2235.4 | 2176.4 | 1427.2 | 2401   | 1931.9 | 1908.4 | 0.266673532 | 2264.9   | 1917.125 | 347.775 | 1.181404447 | 0.2602  | -1.187 |
| 95517_i_at | 1437.6 | 1838.1 | 1820.1 | 1576.9 | 2076.5 | 1695.8 | 1575.6 | 1970.1 | 0.330083588 | 1668.175 | 1829.5   | 161.325 | 0.911820169 | 0.3361  | -1.096 |
| 95518_at   | 279.8  | 244.2  | 226.7  | 261.1  | 266.7  | 395    | 379.6  | 467.4  | 0.05343409  | 252.95   | 377.175  | 124.225 | 0.6706436   | 0.02305 | 1.466  |
| 95520_at   | 238.7  | 226.6  | 186.9  | 171.8  | 203.9  | 210.1  | 234.7  | 225.2  | 0.51111075  | 206      | 218.475  | 12.475  | 0.942899645 | 0.4606  | -1.069 |
| 95521_s_at | 631.1  | 540.8  | 393.1  | 540.7  | 747.2  | 586.8  | 667.5  | 679.3  | 0.057428831 | 526.425  | 670.2    | 143.775 | 0.785474485 | 0.06397 | 1.287  |



|            |        |        |        |        |        |        |        |        |             |          |          |         |             |          |        |
|------------|--------|--------|--------|--------|--------|--------|--------|--------|-------------|----------|----------|---------|-------------|----------|--------|
| 95522_i_at | 1646.2 | 1269   | 1254   | 1356.5 | 1089.9 | 1324.6 | 1080.2 | 1585   | 0.487425352 | 1381.425 | 1269.925 | 111.5   | 1.087800461 | 0.4439   | -1.095 |
| 95523_at   | 5134.7 | 4296.1 | 4811.7 | 4699.9 | 4966.9 | 4932.8 | 5679.3 | 4503.9 | 0.380509967 | 4735.6   | 5020.725 | 285.125 | 0.943210393 | 0.3811   | -1.059 |
| 95525_at   | 315.5  | 344    | 264.9  | 301.3  | 163.8  | 312.8  | 274.7  | 250.5  | 0.183128051 | 306.425  | 250.45   | 55.975  | 1.223497704 | 0.185    | -1.252 |
| 95526_at   | 1206.4 | 1427   | 1371.6 | 1432.5 | 1152.2 | 1409.7 | 1391.1 | 1245.3 | 0.488560051 | 1359.375 | 1299.575 | 59.8    | 1.046015043 | 0.4895   | -1.047 |
| 95527_at   | 238.8  | 352.2  | 267    | 351.4  | 302.7  | 287.9  | 299.7  | 278.9  | 0.755506567 | 302.35   | 292.3    | 10.05   | 1.034382484 | 0.8483   | -1.02  |
| 95528_at   | 111.6  | 140.1  | 158.8  | 181    | 133.6  | 127.5  | 137.6  | 188.1  | 0.955659538 | 147.875  | 146.7    | 1.175   | 1.008009543 | 0.9725   | -1.005 |
| 95529_at   | 505.7  | 910.1  | 559.6  | 655.8  | 681.9  | 649.9  | 499.2  | 696.1  | 0.807088764 | 657.8    | 631.775  | 26.025  | 1.041193463 | 0.8824   | -1.023 |
| 95530_at   | 1013.8 | 904.9  | 1039.7 | 1006.1 | 818.6  | 957.1  | 966.6  | 1113.7 | 0.70532429  | 991.125  | 964      | 27.125  | 1.028137967 | 0.6607   | -1.033 |
| 95531_at   | 754    | 679.7  | 687.5  | 715.9  | 545    | 668.9  | 646.7  | 762.8  | 0.3284833   | 709.275  | 655.85   | 53.425  | 1.081459175 | 0.2915   | -1.088 |
| 95532_at   | 25.3   | 4.8    | 26.5   | 16     | 10.7   | 20.7   | 38.7   | 6.8    | 0.906332763 | 18.15    | 19.225   | 1.075   | 0.944083225 | 0.9518   | -1.035 |
| 95533_at   | 319.7  | 319.3  | 353.7  | 735.7  | 316.8  | 441.4  | 315.4  | 346.7  | 0.512059094 | 432.1    | 355.075  | 77.025  | 1.216926002 | 0.5471   | -1.148 |
| 95536_at   | 776.2  | 417    | 631.4  | 696.2  | 551.6  | 355.9  | 538    | 832.9  | 0.64592564  | 630.2    | 569.6    | 60.6    | 1.106390449 | 0.6051   | -1.128 |
| 95537_at   | 232.3  | 220.1  | 244.1  | 179.5  | 168.5  | 278.1  | 201.3  | 261    | 0.79013341  | 219      | 227.225  | 8.225   | 0.963802399 | 0.8665   | -1.024 |
| 95538_at   | 335.1  | 345.6  | 342.8  | 388.6  | 225.9  | 292    | 311.4  | 368.4  | 0.167105546 | 353.025  | 299.425  | 53.6    | 1.179009769 | 0.1465   | -1.195 |
| 95539_at   | 298.7  | 416.8  | 359.5  | 441    | 271.3  | 366.7  | 318.9  | 362    | 0.25602738  | 379      | 329.725  | 49.275  | 1.149442717 | 0.2716   | -1.145 |
| 95540_r_at | 97.5   | 82.5   | 98.5   | 108.3  | 108.8  | 134.1  | 103.2  | 102.7  | 0.14595243  | 96.7     | 112.2    | 15.5    | 0.861853832 | 0.1313   | 1.159  |
| 95541_at   | 942.3  | 991.6  | 1150.1 | 1013.1 | 772.5  | 1059.5 | 928.4  | 757.3  | 0.145422911 | 1024.275 | 879.425  | 144.85  | 1.164709896 | 0.1282   | -1.173 |
| 95542_at   | 6851.5 | 5796.5 | 6363.4 | 6307.3 | 5272.4 | 5293.4 | 5531.6 | 5578.9 | 0.018408555 | 6329.675 | 5419.075 | 910.6   | 1.168036058 | 0.006101 | -1.166 |
| 95543_at   | 1255.5 | 956.3  | 1110.7 | 1200.5 | 779.8  | 834.3  | 786.6  | 825.1  | 0.013704033 | 1130.75  | 806.45   | 324.3   | 1.402132804 | 0.001714 | -1.395 |
| 95544_at   | 93     | 106.2  | 94.5   | 108.9  | 113.4  | 138.3  | 114.5  | 156.7  | 0.055915311 | 100.65   | 130.725  | 30.075  | 0.76993689  | 0.02758  | 1.29   |
| 95545_at   | 590.4  | 639.1  | 755    | 714.2  | 756.6  | 791.3  | 765.7  | 1068.2 | 0.103356967 | 674.675  | 845.45   | 170.775 | 0.798006979 | 0.0682   | 1.246  |
| 95546_g_at | 1828.6 | 1707.2 | 1380.9 | 1320   | 2011.7 | 2030.7 | 1486.8 | 1428.5 | 0.414856196 | 1559.175 | 1739.425 | 180.25  | 0.896373802 | 0.4266   | 1.111  |
| 95547_at   | 360    | 352.9  | 411.8  | 409    | 496.2  | 409.6  | 363.5  | 497.1  | 0.183142633 | 383.425  | 441.6    | 58.175  | 0.868263134 | 0.172    | 1.145  |
| 95549_at   | 676.1  | 409.3  | 516    | 484.3  | 326.7  | 503.7  | 409.8  | 415.4  | 0.1671643   | 521.425  | 413.9    | 107.525 | 1.259784972 | 0.1497   | -1.254 |
| 95550_at   | 168.7  | 129.5  | 107.8  | 147.8  | 103.2  | 144.1  | 107.7  | 138.9  | 0.40576201  | 138.45   | 123.475  | 14.975  | 1.121279611 | 0.4165   | -1.119 |
| 95551_at   | 454.2  | 624.5  | 574.6  | 558.3  | 462.2  | 636.9  | 485.7  | 656.2  | 0.90940483  | 552.9    | 560.25   | 7.35    | 0.986880857 | 0.9482   | -1.008 |
| 95552_at   | 2.8    | 13.8   | 0.6    | 2.4    | 21.2   | 2.3    | 2.5    | 7.4    | 0.547017398 | 4.9      | 8.35     | 3.45    | 0.586826347 | 0.4381   | 1.971  |
| 95553_at   | 109.4  | 68.6   | 79.1   | 81.9   | 50.7   | 89.2   | 63.9   | 45     | 0.137415708 | 84.75    | 62.2     | 22.55   | 1.362540193 | 0.1163   | -1.391 |
| 95554_at   | 40.3   | 11.7   | 12.5   | 35.2   | 16.2   | 31.1   | 41.5   | 39.3   | 0.481472486 | 24.925   | 32.025   | 7.1     | 0.778298205 | 0.4154   | 1.411  |
| 95555_at   | 649    | 1263.4 | 1068.6 | 983.8  | 1339.7 | 985.6  | 1155.5 | 1076   | 0.366584543 | 991.2    | 1139.2   | 148     | 0.87008427  | 0.3412   | 1.175  |
| 95556_at   | 1053   | 933.2  | 863.2  | 667    | 864.2  | 864.5  | 838.5  | 768    | 0.622284253 | 879.1    | 833.8    | 45.3    | 1.054329575 | 0.7008   | -1.041 |
| 95557_at   | 332.5  | 797    | 598.4  | 524.7  | 671.5  | 659.2  | 637    | 736.7  | 0.327280468 | 563.15   | 676.1    | 112.95  | 0.832938914 | 0.262    | 1.257  |
| 95559_at   | 1278.4 | 1522.4 | 1379.1 | 1325.1 | 1387.3 | 1838.5 | 1535.6 | 1864.4 | 0.091048474 | 1376.25  | 1656.45  | 280.2   | 0.830843068 | 0.06843  | 1.197  |
| 95561_at   | 396.3  | 365.3  | 394.4  | 402.8  | 288.3  | 348.1  | 373.4  | 238.1  | 0.079427085 | 389.7    | 311.975  | 77.725  | 1.249138553 | 0.06195  | -1.267 |
| 95562_at   | 1.4    | 2.8    | 3.9    | 1.3    | 3.5    | 4.3    | 5.5    | 7.3    | 0.037819963 | 2.35     | 5.15     | 2.8     | 0.45631068  | 0.03326  | 2.376  |
| 95563_at   | 382.8  | 397.8  | 455.3  | 449.3  | 280.1  | 446    | 317    | 363.6  | 0.150522233 | 421.3    | 351.675  | 69.625  | 1.19798109  | 0.1262   | -1.213 |
| 95564_at   | 188.1  | 208.7  | 226    | 213.7  | 161.6  | 178.9  | 162.1  | 205.8  | 0.052245207 | 209.125  | 177.1    | 32.025  | 1.18083004  | 0.04909  | -1.184 |
| 95565_at   | 675.8  | 513.4  | 617.4  | 526.2  | 618.3  | 563.1  | 551.8  | 513.1  | 0.64710111  | 583.2    | 561.575  | 21.625  | 1.038507768 | 0.6742   | -1.034 |
| 95566_at   | 75.1   | 71     | 71.3   | 92.6   | 66.6   | 81     | 86.9   | 120.5  | 0.417351703 | 77.5     | 88.75    | 11.25   | 0.873239437 | 0.4263   | 1.125  |
| 95567_at   | 309    | 270.9  | 283.7  | 297.3  | 163.4  | 292.6  | 214.2  | 247.3  | 0.108073068 | 290.225  | 229.375  | 60.85   | 1.265286104 | 0.08938  | -1.292 |
| 95568_at   | 220.8  | 163    | 200    | 232.7  | 208.4  | 177.4  | 179.5  | 188.8  | 0.404043846 | 204.125  | 188.525  | 15.6    | 1.082747646 | 0.4357   | -1.075 |
| 95569_at   | 12.1   | 12.3   | 13.2   | 27.2   | 66.9   | 15.8   | 23.1   | 5.6    | 0.458944426 | 16.2     | 27.85    | 11.65   | 0.581687612 | 0.6805   | 1.267  |
| 95571_at   | 519.8  | 620.5  | 678    | 788.4  | 571.7  | 912.6  | 722.6  | 568.6  | 0.685873533 | 651.675  | 693.875  | 42.2    | 0.939182129 | 0.7152   | -1.056 |
| 95573_at   | 336    | 506.7  | 331.6  | 567.5  | 475.8  | 407.6  | 525    | 722.8  | 0.323962364 | 435.45   | 532.8    | 97.35   | 0.817286036 | 0.3022   | 1.231  |
| 95574_f_at | 30.7   | 9.8    | 31.1   | 28.4   | 16.8   | 40.7   | 55.2   | 9.8    | 0.653934466 | 25       | 30.625   | 5.625   | 0.816326531 | 0.8719   | -1.085 |
| 95575_r_at | 115.3  | 96     | 114.1  | 90     | 141.4  | 121.2  | 124.2  | 118.2  | 0.036076902 | 103.85   | 126.25   | 22.4    | 0.822574257 | 0.03588  | 1.22   |
| 95577_at   | 707    | 504.3  | 610.1  | 787.1  | 419.1  | 755.5  | 764.8  | 668.9  | 0.999622803 | 652.125  | 652.075  | 0.05    | 1.000076678 | 0.938    | -1.014 |
| 95580_at   | 272.1  | 224.3  | 309.4  | 314.4  | 374.6  | 294.7  | 392.2  | 264.9  | 0.220785131 | 280.05   | 331.6    | 51.55   | 0.844541616 | 0.2271   | 1.179  |
| 95584_at   | 62.2   | 64     | 75.1   | 60.1   | 62.2   | 61.2   | 51.4   | 82.2   | 0.886362327 | 65.35    | 64.25    | 1.1     | 1.017120623 | 0.8072   | -1.028 |
| 95585_at   | 17     | 71.3   | 98.1   | 158.7  | 109    | 189.8  | 125.8  | 123.5  | 0.201736511 | 86.275   | 137.025  | 50.75   | 0.62962963  | 0.2027   | 2.03   |
| 95586_at   | 155.4  | 250.3  | 205.7  | 219.9  | 372.1  | 306.2  | 374.8  | 341.3  | 0.001699281 | 207.825  | 348.6    | 140.775 | 0.596170396 | 0.003143 | 1.696  |
| 95587_at   | 308.6  | 293.3  | 401.8  | 303.8  | 394.5  | 307.2  | 312.9  | 325.3  | 0.810615699 | 326.875  | 334.975  | 8.1     | 0.975819091 | 0.7754   | -1.028 |
| 95588_at   | 208.1  | 330.6  | 162.8  | 283.7  | 215.1  | 231.9  | 178.7  | 243.2  | 0.510463203 | 246.3    | 217.225  | 29.075  | 1.133847393 | 0.5981   | -1.101 |
| 95590_at   | 913.8  | 689.9  | 792.3  | 562.8  | 661.5  | 720.6  | 726.7  | 743.8  | 0.75005259  | 739.7    | 713.15   | 26.55   | 1.037229194 | 0.8443   | -1.022 |
| 95591_at   | 408.3  | 889.9  | 595.5  | 669.4  | 537.9  | 578.8  | 628.4  | 743.8  | 0.8729304   | 640.775  | 622.225  | 18.55   | 1.029812367 | 0.9948   | -1.001 |
| 95592_at   | 592.4  | 697.1  | 678.7  | 553.5  | 927    | 626.8  | 600.3  | 607.9  | 0.523237359 | 630.425  | 690.5    | 60.075  | 0.912997828 | 0.5324   | -1.081 |



|            |        |        |        |        |         |        |        |        |             |          |          |          |             |          |        |
|------------|--------|--------|--------|--------|---------|--------|--------|--------|-------------|----------|----------|----------|-------------|----------|--------|
| 95593_at   | 872.9  | 659.1  | 774.4  | 732.7  | 673.2   | 803.2  | 798.1  | 806.8  | 0.855178684 | 759.775  | 770.325  | 10.55    | 0.986304482 | 0.8332   | -1.016 |
| 95594_at   | 345.3  | 468.1  | 434.1  | 557    | 331     | 449.4  | 413.1  | 597.3  | 0.96308213  | 451.125  | 447.7    | 3.425    | 1.007650212 | 0.9234   | -1.016 |
| 95595_at   | 16.1   | 69.5   | 25.5   | 89.3   | 137.2   | 143.3  | 105.9  | 35.1   | 0.12409225  | 50.1     | 105.375  | 55.275   | 0.47544484  | 0.1602   | 2.312  |
| 95596_at   | 204.8  | 410.1  | 274.9  | 276.6  | 348.7   | 241.8  | 274.4  | 344.1  | 0.840854858 | 291.6    | 302.25   | 10.65    | 0.964764268 | 0.7543   | -1.057 |
| 95597_at   | 19.8   | 44     | 33.8   | 30.5   | 40.2    | 32.1   | 29     | 42.7   | 0.532922101 | 32.025   | 36       | 3.975    | 0.889583333 | 0.4743   | 1.156  |
| 95599_at   | 1691.8 | 1912.9 | 1453.1 | 1981.5 | 2261.8  | 1573.1 | 1861.5 | 1998.7 | 0.414549128 | 1759.825 | 1923.775 | 163.95   | 0.914776936 | 0.4281   | -1.092 |
| 95600_at   | 390.4  | 293.7  | 320.9  | 310.7  | 280.6   | 298.5  | 280.1  | 292.1  | 0.147159129 | 328.925  | 287.825  | 41.1     | 1.142795101 | 0.0918   | -1.137 |
| 95601_at   | 681.8  | 869.5  | 689.6  | 1006.4 | 686.6   | 820.4  | 632    | 937    | 0.69466499  | 811.825  | 769      | 42.825   | 1.055689207 | 0.6995   | -1.054 |
| 95602_at   | 1408.8 | 1816.4 | 1683.4 | 1496.7 | 1854    | 1776.1 | 2030.2 | 1891   | 0.044429123 | 1601.325 | 1887.825 | 286.5    | 0.848238052 | 0.0383   | 1.183  |
| 95603_at   | 87.1   | 92.2   | 73.2   | 86.6   | 72.5    | 133.9  | 111.4  | 122.5  | 0.152822676 | 84.775   | 110.075  | 25.3     | 0.770156711 | 0.15     | 1.27   |
| 95604_at   | 722.8  | 751    | 534.5  | 822.4  | 534.6   | 607.3  | 505    | 717.5  | 0.186460923 | 707.675  | 591.1    | 116.575  | 1.197217053 | 0.1962   | -1.193 |
| 95606_at   | 218    | 210.2  | 211    | 276.9  | 181.5   | 245    | 200.8  | 324    | 0.815196921 | 229.025  | 237.825  | 8.8      | 0.962998003 | 0.8979   | -1.019 |
| 95607_at   | 1034.1 | 975.3  | 1151.5 | 962.3  | 1109.5  | 1000.3 | 1138.6 | 933    | 0.828908821 | 1030.8   | 1045.35  | 14.55    | 0.986081217 | 0.8357   | -1.013 |
| 95608_at   | 306.5  | 226.6  | 253.4  | 300.2  | 227.2   | 329.6  | 258    | 281.7  | 0.935128829 | 271.675  | 274.125  | 2.45     | 0.991062472 | 0.9472   | -1.007 |
| 95609_at   | 399.1  | 645.1  | 448.8  | 441.5  | 450.8   | 435.2  | 463.5  | 519.2  | 0.791647039 | 483.625  | 467.175  | 16.45    | 1.035211644 | 0.8681   | -1.02  |
| 95610_at   | 609.9  | 447.3  | 522    | 475.6  | 384.5   | 482.7  | 410.6  | 321.9  | 0.058378628 | 513.7    | 399.925  | 113.775  | 1.284490842 | 0.05628  | -1.289 |
| 95611_at   | 1332.2 | 832.8  | 1061.1 | 1154.9 | 1259    | 1346.4 | 1263   | 1205.1 | 0.194907451 | 1095.25  | 1268.375 | 173.125  | 0.863506455 | 0.1643   | 1.174  |
| 95612_at   | 526.2  | 690.9  | 683.6  | 585.5  | 551.1   | 538.9  | 555.9  | 630.7  | 0.301544799 | 621.55   | 569.15   | 52.4     | 1.092067118 | 0.3039   | -1.087 |
| 95613_at   | 923.1  | 1044.2 | 989.3  | 1192.9 | 936.9   | 1148.9 | 998.9  | 871.1  | 0.579122508 | 1037.375 | 988.95   | 48.425   | 1.048966075 | 0.566    | -1.05  |
| 95614_at   | 1274.5 | 1011.2 | 1171.6 | 1338.4 | 568.9   | 1183.9 | 1210.6 | 1159.9 | 0.375996954 | 1198.925 | 1030.825 | 168.1    | 1.163073267 | 0.3646   | -1.209 |
| 95616_at   | 579.5  | 503.2  | 471.7  | 473.2  | 539.6   | 518.5  | 426.7  | 519.8  | 0.877469133 | 506.9    | 501.15   | 5.75     | 1.011473611 | 0.8734   | -1.012 |
| 95617_at   | 159.3  | 165.3  | 139.5  | 169.1  | 132.1   | 162.2  | 135.8  | 201.5  | 0.982669384 | 158.3    | 157.9    | 0.4      | 1.002533249 | 0.8965   | -1.015 |
| 95618_at   | 197.6  | 373.1  | 278.5  | 329.6  | 303.5   | 369.8  | 403.6  | 379    | 0.173924978 | 294.7    | 363.975  | 69.275   | 0.809670994 | 0.1742   | 1.262  |
| 95619_at   | 134    | 217.8  | 209.7  | 237.2  | 245.5   | 209.7  | 268.1  | 194.5  | 0.334311934 | 199.675  | 229.45   | 29.775   | 0.870233166 | 0.3368   | 1.166  |
| 95620_at   | 1132.6 | 876    | 930.9  | 949.3  | 1195.2  | 1132.7 | 1263.3 | 913.2  | 0.157345477 | 972.2    | 1126.1   | 153.9    | 0.863333629 | 0.1596   | 1.155  |
| 95621_at   | 86.3   | 63.1   | 66.9   | 89.2   | 31.2    | 95.2   | 73.2   | 151.6  | 0.685938761 | 76.375   | 87.8     | 11.425   | 0.869874715 | 0.9902   | -1.004 |
| 95622_at   | 1350.1 | 1249   | 1191   | 1397.7 | 958.9   | 1472.6 | 1203.6 | 1573.9 | 0.972984357 | 1296.95  | 1302.25  | 5.3      | 0.995930121 | 0.9215   | -1.012 |
| 95625_at   | 223.3  | 432.4  | 350.8  | 350.9  | 346.3   | 278.2  | 310.7  | 329.2  | 0.639145313 | 339.35   | 316.1    | 23.25    | 1.073552673 | 0.7608   | -1.048 |
| 95626_at   | 272.6  | 270.1  | 218    | 318.7  | 228.8   | 321.9  | 254.3  | 289.6  | 0.899828317 | 269.85   | 273.65   | 3.8      | 0.986113649 | 0.8975   | -1.015 |
| 95627_at   | 541.3  | 641.7  | 492.3  | 1024.9 | 580.7   | 825.4  | 584.2  | 1195.5 | 0.544157481 | 675.05   | 796.45   | 121.4    | 0.847573608 | 0.5197   | 1.176  |
| 95628_at   | 152.3  | 190    | 147.2  | 234.9  | 123.4   | 126.7  | 114    | 133.2  | 0.065549716 | 181.1    | 124.325  | 56.775   | 1.456665996 | 0.01931  | -1.433 |
| 95629_at   | 2196.3 | 1627.5 | 2093.7 | 1838.7 | 1700.6  | 1716.3 | 1739.3 | 1604   | 0.14586766  | 1939.05  | 1690.05  | 249      | 1.147332919 | 0.1094   | -1.14  |
| 95630_at   | 341.6  | 394.6  | 358.4  | 422.5  | 474.8   | 374.4  | 488.2  | 434.8  | 0.093141045 | 379.275  | 443.05   | 63.775   | 0.856054621 | 0.09115  | 1.166  |
| 95631_at   | 2173.7 | 2731.6 | 2533   | 2198.9 | 2737    | 2280.3 | 2616.3 | 2330.7 | 0.656450668 | 2409.3   | 2491.075 | 81.775   | 0.967172807 | 0.6391   | -1.036 |
| 95632_f_at | 33.5   | 141.4  | 78.8   | 60.5   | 185.2   | 127.1  | 116.5  | 140.2  | 0.066119596 | 78.55    | 142.25   | 63.7     | 0.552196837 | 0.06566  | 2.031  |
| 95633_r_at | 377.4  | 424.9  | 432    | 440.2  | 545.7   | 356.2  | 409.1  | 544.2  | 0.424785225 | 418.625  | 463.8    | 45.175   | 0.902598103 | 0.4647   | -1.091 |
| 95634_at   | 839    | 879.9  | 906    | 741.7  | 1162.4  | 770.2  | 861.9  | 709.5  | 0.764701422 | 841.65   | 876      | 34.35    | 0.960787671 | 0.8396   | -1.025 |
| 95635_g_at | 1125.3 | 1211.4 | 1118.4 | 935.7  | 1410    | 1044.8 | 1223.9 | 990.4  | 0.559664383 | 1097.7   | 1167.275 | 69.575   | 0.940395365 | 0.5839   | -1.058 |
| 95636_at   | 1211.7 | 1195.7 | 1179.4 | 1070.3 | 1449.9  | 1052.4 | 1212.3 | 1091.4 | 0.716595546 | 1164.275 | 1201.5   | 37.225   | 0.969017894 | 0.76     | -1.025 |
| 95637_at   | 345.1  | 449.2  | 462.3  | 358.9  | 501.7   | 345.7  | 454.3  | 400.9  | 0.647494149 | 403.875  | 425.65   | 21.775   | 0.948842946 | 0.658    | -1.053 |
| 95639_at   | 111    | 91.5   | 41.7   | 97.1   | 54      | 43.4   | 56.6   | 33.1   | 0.078362396 | 85.325   | 46.775   | 38.55    | 1.824158204 | 0.06856  | -1.751 |
| 95641_at   | 2202   | 2480.8 | 1893.2 | 2283.2 | 4116.9  | 2305.3 | 2833.8 | 2035.9 | 0.282861164 | 2214.8   | 2822.975 | 608.175  | 0.784562385 | 0.2473   | 1.234  |
| 95642_at   | 138.7  | 178.2  | 147.7  | 462.6  | 181.1   | 141.5  | 169.3  | 357.7  | 0.840638519 | 231.8    | 212.4    | 19.4     | 1.0913371   | 0.953    | -1.022 |
| 95643_at   | 531.3  | 800.7  | 552.9  | 538.5  | 744.7   | 914.9  | 782.2  | 670.3  | 0.085479937 | 605.85   | 778.025  | 172.175  | 0.778702484 | 0.07011  | 1.296  |
| 95645_at   | 121.1  | 225.9  | 145    | 165.3  | 224     | 101.2  | 145.1  | 222.8  | 0.820861647 | 164.325  | 173.275  | 8.95     | 0.948348002 | 0.9086   | -1.028 |
| 95646_at   | 1534.9 | 1443.1 | 1560   | 1254   | 1919.4  | 1546.2 | 1722.8 | 1465.3 | 0.135206625 | 1448     | 1663.425 | 215.425  | 0.870493109 | 0.129    | 1.147  |
| 95647_f_at | 2071.5 | 1651.3 | 1639.1 | 1854.5 | 1472.3  | 1660.6 | 1513.8 | 1432   | 0.061188817 | 1804.1   | 1519.675 | 284.425  | 1.187161729 | 0.03899  | -1.184 |
| 95648_at   | 2341.8 | 1890.9 | 2205   | 2151.8 | 1497.5  | 1830.5 | 1551.8 | 1793.4 | 0.009290841 | 2147.375 | 1668.3   | 479.075  | 1.28716358  | 0.009633 | -1.288 |
| 95649_at   | 976    | 704.7  | 916.3  | 716.5  | 705.9   | 910.1  | 1024.4 | 910.4  | 0.558477768 | 828.375  | 887.7    | 59.325   | 0.93316999  | 0.5602   | -1.073 |
| 95650_at   | 3769.7 | 2931.5 | 3158.1 | 3439.6 | 2707.5  | 2892.2 | 2675.4 | 3196.9 | 0.087124855 | 3324.725 | 2868     | 456.725  | 1.159248605 | 0.07526  | -1.157 |
| 95651_at   | 104.2  | 47.2   | 109.3  | 99     | 76.8    | 67.4   | 103.8  | 102.3  | 0.895695798 | 89.925   | 87.575   | 2.35     | 1.026834142 | 0.9741   | -1.008 |
| 95652_at   | 6932.2 | 6051.6 | 6764.3 | 5027.9 | 10011.7 | 5912.2 | 6808.2 | 6808.8 | 0.294627962 | 6194     | 7385.225 | 1191.225 | 0.838701597 | 0.2706   | 1.178  |
| 95653_at   | 947.8  | 877.6  | 869.8  | 841    | 827.3   | 915.5  | 837.3  | 793.6  | 0.282033098 | 884.05   | 843.425  | 40.625   | 1.048166701 | 0.2721   | -1.049 |
| 95654_at   | 3462.1 | 3427.6 | 3427.8 | 3187.3 | 4197    | 3524.1 | 3466   | 2897.9 | 0.628939352 | 3376.2   | 3521.25  | 145.05   | 0.958807242 | 0.6781   | -1.035 |
| 95655_at   | 453.6  | 296.5  | 382.7  | 518.5  | 188.1   | 187.8  | 192    | 203.9  | 0.018814685 | 412.825  | 192.95   | 219.875  | 2.139543923 | 0.000911 | -2.096 |
| 95656_i_at | 697.7  | 574.5  | 664.6  | 466    | 666.4   | 585.8  | 712.9  | 486.5  | 0.87070557  | 600.7    | 612.9    | 12.2     | 0.980094632 | 0.8662   | -1.022 |



|            |        |        |        |        |        |        |        |        |             |          |          |          |             |          |        |
|------------|--------|--------|--------|--------|--------|--------|--------|--------|-------------|----------|----------|----------|-------------|----------|--------|
| 95657_f_at | 2124.5 | 1805.1 | 1672.5 | 1634.4 | 1558.4 | 1698   | 1623.1 | 1699.2 | 0.238881987 | 1809.125 | 1644.675 | 164.45   | 1.09998936  | 0.1995   | -1.095 |
| 95658_at   | 616.9  | 551.5  | 612.6  | 530.6  | 658.9  | 557.3  | 405.3  | 390.8  | 0.336228176 | 577.9    | 503.075  | 74.825   | 1.148735278 | 0.2686   | -1.174 |
| 95659_at   | 1429.2 | 998.2  | 1190.8 | 1412.4 | 842.1  | 1177.6 | 1033.7 | 1291.6 | 0.26943023  | 1257.65  | 1086.25  | 171.4    | 1.157790564 | 0.2809   | -1.16  |
| 95660_at   | 616.4  | 547    | 767.5  | 538.8  | 716.8  | 656.9  | 650.7  | 610.9  | 0.510003531 | 617.425  | 658.825  | 41.4     | 0.937160855 | 0.4354   | -1.076 |
| 95661_at   | 1028.5 | 1011.9 | 991.6  | 819.9  | 740.6  | 835.9  | 678.7  | 354.2  | 0.051135848 | 962.975  | 652.35   | 310.625  | 1.476163103 | 0.07187  | -1.544 |
| 95662_at   | 1302   | 1110.6 | 1114.4 | 902.3  | 823.8  | 923.4  | 855.9  | 907.4  | 0.062489055 | 1107.325 | 877.625  | 229.7    | 1.261729098 | 0.03015  | -1.253 |
| 95663_at   | 31     | 21.6   | 2.8    | 12.5   | 3.9    | 6.5    | 12.4   | 8.4    | 0.228721659 | 16.975   | 7.8      | 9.175    | 2.176282051 | 0.3901   | -1.715 |
| 95664_at   | 122.5  | 227.2  | 235.8  | 164    | 203.5  | 231.8  | 143.4  | 178.6  | 0.954754935 | 187.375  | 189.325  | 1.95     | 0.989700251 | 0.8804   | -1.029 |
| 95665_at   | 514.4  | 587    | 422.2  | 402.6  | 346.1  | 562.7  | 507.8  | 549.4  | 0.884682641 | 481.55   | 491.5    | 9.95     | 0.979755849 | 0.9243   | -1.014 |
| 95666_at   | 1581.7 | 1268   | 1635.3 | 1423.7 | 1251.5 | 1559   | 1608.5 | 1271.8 | 0.678615428 | 1477.175 | 1422.7   | 54.475   | 1.038289871 | 0.6695   | -1.04  |
| 95668_at   | 58.1   | 50.8   | 65.4   | 10.7   | 13.5   | 51.4   | 58.2   | 68     | 0.931729073 | 46.25    | 47.775   | 1.525    | 0.96807954  | 0.9028   | -1.075 |
| 95669_g_at | 217.3  | 142    | 169.6  | 181.4  | 150.8  | 169.6  | 158.1  | 201.7  | 0.710384005 | 177.575  | 170.05   | 7.525    | 1.044251691 | 0.7384   | -1.039 |
| 95670_at   | 80.5   | 37.6   | 48.2   | 114    | 85.7   | 51.2   | 33.6   | 67     | 0.623827808 | 70.075   | 59.375   | 10.7     | 1.180210526 | 0.6982   | -1.139 |
| 95671_at   | 230.5  | 232.4  | 241    | 237.5  | 366.4  | 330.3  | 383.8  | 316.7  | 0.004652663 | 235.35   | 349.3    | 113.95   | 0.673776124 | 0.000138 | 1.48   |
| 95672_at   | 13.1   | 23.8   | 24.5   | 36     | 46.2   | 54     | 35.4   | 28.5   | 0.065001751 | 24.35    | 41.025   | 16.675   | 0.593540524 | 0.0715   | 1.738  |
| 95673_s_at | 1840.2 | 2664.5 | 2095.4 | 2117.4 | 2708.9 | 2282.4 | 2090.6 | 1982.1 | 0.726393809 | 2179.375 | 2266     | 86.625   | 0.961771845 | 0.705    | -1.042 |
| 95674_r_at | 1860.6 | 2223.3 | 2091.8 | 1927.1 | 2799   | 1930.4 | 2011   | 2623.4 | 0.249098147 | 2025.7   | 2340.95  | 315.25   | 0.865332451 | 0.2352   | 1.143  |
| 95675_at   | 858.8  | 1002.7 | 915.7  | 840.5  | 728.4  | 1003.1 | 924.9  | 870.9  | 0.75440971  | 904.425  | 881.825  | 22.6     | 1.025628668 | 0.7182   | -1.03  |
| 95676_at   | 6.3    | 11.9   | 11.4   | 10.9   | 13.9   | 13     | 11.5   | 24.2   | 0.153489935 | 10.125   | 15.65    | 5.525    | 0.646964856 | 0.1075   | 1.52   |
| 95677_at   | 1162   | 1100.1 | 1121.1 | 964.5  | 942.2  | 1069.7 | 898.2  | 1038.1 | 0.139802139 | 1086.925 | 987.05   | 99.875   | 1.10118535  | 0.1452   | -1.101 |
| 95679_at   | 649.5  | 618.2  | 583.4  | 506.8  | 759.4  | 539.9  | 688.4  | 534.4  | 0.549736451 | 589.475  | 630.525  | 41.05    | 0.934895524 | 0.5828   | -1.062 |
| 95680_at   | 177.1  | 180.3  | 171.3  | 230.6  | 181.6  | 199.8  | 152.5  | 217.2  | 0.919598105 | 189.825  | 187.775  | 2.05     | 1.010917321 | 0.9093   | -1.012 |
| 95681_f_at | 212.6  | 250.6  | 191.8  | 234.9  | 137.4  | 256.8  | 165.2  | 204.9  | 0.333741364 | 222.475  | 191.075  | 31.4     | 1.164333377 | 0.2807   | -1.191 |
| 95682_at   | 5097.2 | 5128.3 | 4733.9 | 4759   | 6341.9 | 4835   | 5432.7 | 5512.3 | 0.14635703  | 4929.6   | 5530.475 | 600.875  | 0.891352009 | 0.1116   | -1.117 |
| 95683_g_at | 3518.6 | 3700.7 | 3643.5 | 4302.3 | 3267.4 | 3684.3 | 4044.1 | 4344.6 | 0.885466684 | 3791.275 | 3835.1   | 43.825   | 0.988572658 | 0.9109   | -1.009 |
| 95684_at   | 26.9   | 38.7   | 17.9   | 52.1   | 23.9   | 23.4   | 14.8   | 42.2   | 0.438461654 | 33.9     | 26.075   | 7.825    | 1.300095877 | 0.4504   | -1.289 |
| 95685_at   | 549.8  | 550    | 627.3  | 482    | 798.2  | 529.5  | 641.9  | 462.6  | 0.520360627 | 552.275  | 608.05   | 55.775   | 0.908272346 | 0.5653   | -1.082 |
| 95686_at   | 96.2   | 115    | 87     | 91.5   | 89     | 126.1  | 106.5  | 106.2  | 0.368464986 | 97.425   | 106.95   | 9.525    | 0.910939691 | 0.3654   | -1.096 |
| 95688_at   | 1992.8 | 1591.7 | 1809.7 | 1577.8 | 2001.8 | 1740.4 | 1820.7 | 1693.9 | 0.576657965 | 1743     | 1814.2   | 71.2     | 0.960754051 | 0.5461   | -1.044 |
| 95689_at   | 815.2  | 886.5  | 880.6  | 789.8  | 835.7  | 954.6  | 775.2  | 726.1  | 0.730722381 | 843.025  | 822.9    | 20.125   | 1.024456192 | 0.6813   | -1.029 |
| 95690_at   | 1492   | 1287.6 | 1261.4 | 1166   | 888.6  | 1360.6 | 1144.5 | 996.4  | 0.155153169 | 1301.75  | 1097.525 | 204.225  | 1.186077766 | 0.1393   | -1.197 |
| 95692_at   | 1776.3 | 1843.6 | 1692.1 | 1937.1 | 1367.4 | 1465   | 1555.3 | 2093.6 | 0.329402828 | 1812.275 | 1620.325 | 191.95   | 1.118463888 | 0.2511   | -1.133 |
| 95693_at   | 3332.5 | 2856.1 | 2971   | 2509.9 | 2815   | 2934.7 | 2888.7 | 2531.1 | 0.546654154 | 2917.375 | 2792.375 | 125      | 1.044764761 | 0.5707   | -1.041 |
| 95694_at   | 4412.6 | 4159.5 | 3989.2 | 3664.1 | 7652.3 | 3528.9 | 4897.5 | 3873.9 | 0.394378877 | 4056.35  | 4988.15  | 931.8    | 0.813197278 | 0.3964   | 1.176  |
| 95695_at   | 947.8  | 844    | 1028.3 | 799.8  | 780.9  | 877.8  | 657.1  | 767.8  | 0.098885838 | 904.975  | 770.9    | 134.075  | 1.173920093 | 0.09791  | -1.174 |
| 95696_at   | 5443.8 | 5112.6 | 4506.7 | 4080.1 | 6333.6 | 5261.8 | 5814.8 | 4544.9 | 0.203587521 | 4785.8   | 5488.775 | 702.975  | 0.871924974 | 0.2076   | 1.145  |
| 95697_at   | 57.1   | 39.7   | 60.6   | 67.5   | 34.6   | 53     | 65.8   | 89.9   | 0.740243253 | 56.225   | 60.825   | 4.6      | 0.924373202 | 0.8714   | -1.04  |
| 95698_at   | 4215.3 | 3692   | 2912.4 | 3124.5 | 4901.3 | 2958.3 | 3968.3 | 3608.2 | 0.486967111 | 3486.05  | 3859.025 | 372.975  | 0.903349939 | 0.5021   | 1.1    |
| 95699_f_at | 6154.4 | 4356.8 | 5734.1 | 4580.9 | 3660.1 | 4585.9 | 4538.9 | 4291.9 | 0.120280918 | 5206.55  | 4269.2   | 937.35   | 1.219561042 | 0.1006   | -1.211 |
| 95700_r_at | 2645.7 | 1801.7 | 2332.6 | 1924.7 | 1557.4 | 2258.4 | 1974.9 | 1852.1 | 0.317445591 | 2176.175 | 1910.7   | 265.475  | 1.138941226 | 0.3191   | -1.136 |
| 95701_at   | 741.6  | 1516   | 1053.4 | 1348.8 | 687.6  | 959.9  | 945.8  | 689.5  | 0.136398311 | 1164.95  | 820.7    | 344.25   | 1.419458998 | 0.1248   | -1.388 |
| 95702_at   | 618.8  | 788.6  | 738.5  | 834.8  | 717.5  | 654.6  | 784.2  | 670.6  | 0.514209745 | 745.175  | 706.725  | 38.45    | 1.054405886 | 0.5431   | -1.051 |
| 95703_at   | 1548.4 | 1574   | 1559.6 | 1703.7 | 1136.7 | 1550.9 | 1356   | 1420.4 | 0.069627386 | 1596.425 | 1366     | 230.425  | 1.168685944 | 0.05805  | -1.175 |
| 95704_at   | 870.7  | 872.4  | 878.3  | 937.5  | 843.4  | 782.9  | 779.2  | 1070.2 | 0.785525482 | 889.725  | 868.925  | 20.8     | 1.023937624 | 0.6921   | -1.032 |
| 95705_s_at | 360.4  | 584.3  | 532.5  | 468.4  | 1245.5 | 353.3  | 454.3  | 643    | 0.42205644  | 486.4    | 674.025  | 187.625  | 0.721634954 | 0.4738   | 1.251  |
| 95706_at   | 68.7   | 50.5   | 50.9   | 52     | 101.3  | 64.5   | 62.6   | 49.1   | 0.314641436 | 55.525   | 69.375   | 13.85    | 0.80036036  | 0.2882   | 1.217  |
| 95707_at   | 1339.9 | 1639.9 | 1493.1 | 1202.4 | 3508.4 | 1261.3 | 1783.7 | 1321.6 | 0.375260677 | 1418.825 | 1968.75  | 549.925  | 0.720673016 | 0.3597   | 1.275  |
| 95708_at   | 2732.9 | 2583   | 2686.2 | 2605.2 | 1997.7 | 2356.9 | 2196.8 | 2086.8 | 0.003846814 | 2651.825 | 2159.55  | 492.275  | 1.227952583 | 0.001574 | -1.23  |
| 95709_at   | 3712.7 | 3295.9 | 3399.8 | 3062   | 4014   | 3809.3 | 3773.8 | 3838   | 0.028615326 | 3367.6   | 3858.775 | 491.175  | 0.872712195 | 0.01684  | 1.148  |
| 95712_at   | 1382.1 | 1022.7 | 1229.8 | 1036.1 | 1492.3 | 1082.7 | 1178.8 | 1214.2 | 0.567200162 | 1167.675 | 1242     | 74.325   | 0.940157005 | 0.5525   | -1.064 |
| 95713_at   | 1005.6 | 1460.7 | 1246.6 | 1146.3 | 1293.7 | 1363.7 | 1472.4 | 1317.3 | 0.228984612 | 1214.8   | 1361.775 | 146.975  | 0.89207101  | 0.1928   | 1.13   |
| 95714_at   | 3285   | 2354.4 | 2509.7 | 2863.7 | 3187.3 | 2472.4 | 2594.9 | 2308.8 | 0.703972447 | 2753.2   | 2640.85  | 112.35   | 1.042543121 | 0.7011   | -1.042 |
| 95715_at   | 4628   | 4846.7 | 4501.5 | 4351.7 | 8216.2 | 3828.5 | 4761.1 | 5012   | 0.429383253 | 4581.975 | 5454.45  | 872.475  | 0.840043451 | 0.4424   | 1.143  |
| 95716_at   | 3063.8 | 3570.2 | 2875.2 | 4210.6 | 3432.1 | 3405   | 3760   | 3661.8 | 0.690183213 | 3429.95  | 3564.725 | 134.775  | 0.962192034 | 0.6026   | -1.05  |
| 95717_at   | 1423.6 | 1071   | 1335.7 | 1270.9 | 1178.5 | 1211.9 | 1224.7 | 1149.6 | 0.346854794 | 1275.3   | 1191.175 | 84.125   | 1.070623544 | 0.3523   | -1.065 |
| 95718_f_at | 9343.3 | 7135.2 | 5884.4 | 7880   | 6508.3 | 5087.3 | 5245.6 | 8443.8 | 0.28694985  | 7560.725 | 6321.25  | 1239.475 | 1.19608068  | 0.2655   | -1.205 |



|            |        |        |        |        |        |        |        |         |             |          |          |         |             |          |        |
|------------|--------|--------|--------|--------|--------|--------|--------|---------|-------------|----------|----------|---------|-------------|----------|--------|
| 95719_at   | 23.8   | 21.2   | 27.8   | 15.3   | 22.8   | 17.3   | 15.8   | 56.6    | 0.57837936  | 22.025   | 28.125   | 6.1     | 0.783111111 | 0.7135   | 1.13   |
| 95721_at   | 1376   | 1880.1 | 1742.7 | 1847.3 | 1263.1 | 1641.8 | 1667.5 | 1268.1  | 0.170082228 | 1711.525 | 1460.125 | 251.4   | 1.17217704  | 0.1804   | -1.174 |
| 95722_at   | 946.9  | 738.5  | 822.5  | 992.1  | 1079.2 | 1036.8 | 1081.7 | 1111.2  | 0.035531364 | 875      | 1077.225 | 202.225 | 0.812272274 | 0.02076  | 1.239  |
| 95723_r_at | 4954   | 6181.9 | 6650.2 | 5290.1 | 6560.3 | 6229.6 | 6555.8 | 5557    | 0.364460241 | 5769.05  | 6225.675 | 456.625 | 0.926654539 | 0.3423   | -1.084 |
| 95725_at   | 290.4  | 240.8  | 301.8  | 226    | 214.7  | 259.4  | 236.8  | 282.8   | 0.516174695 | 264.75   | 248.425  | 16.325  | 1.065713998 | 0.5282   | -1.064 |
| 95726_at   | 922.3  | 1299.1 | 1196.2 | 1329.6 | 1373   | 1169.3 | 1101.4 | 1083    | 0.965751077 | 1186.8   | 1181.675 | 5.125   | 1.004337064 | 0.991    | -1.001 |
| 95727_at   | 6.3    | 8.8    | 5.8    | 8.9    | 18     | 9      | 23.4   | 4.8     | 0.230077295 | 7.45     | 13.8     | 6.35    | 0.539855072 | 0.2585   | 1.593  |
| 95728_g_at | 107.2  | 128.2  | 144.2  | 107.4  | 92.7   | 93.5   | 106.7  | 64.9    | 0.042154804 | 121.75   | 89.45    | 32.3    | 1.361095584 | 0.04931  | -1.372 |
| 95729_at   | 5      | 6.6    | 3.6    | 3.6    | 7.6    | 4.9    | 5.6    | 6.7     | 0.159495418 | 4.7      | 6.2      | 1.5     | 0.758064516 | 0.1433   | 1.349  |
| 95730_at   | 900.1  | 1310.2 | 833    | 777.2  | 1330.2 | 1041.5 | 987.3  | 880.6   | 0.524235223 | 955.125  | 1059.9   | 104.775 | 0.901146335 | 0.4628   | 1.121  |
| 95731_at   | 1705.6 | 1559.3 | 1536.9 | 1516.2 | 1343.5 | 1764.5 | 1752.2 | 1744.4  | 0.554478863 | 1579.5   | 1651.15  | 71.65   | 0.956606002 | 0.606    | -1.04  |
| 95732_at   | 2297.3 | 2115.5 | 1886.3 | 1821.8 | 2353.8 | 2034.5 | 2194.4 | 1796.2  | 0.703348442 | 2030.225 | 2094.725 | 64.5    | 0.969208369 | 0.7108   | -1.031 |
| 95733_at   | 2261   | 2121.7 | 2666.1 | 2363.3 | 2810.5 | 2274.7 | 2556.7 | 2632.7  | 0.22784212  | 2353.025 | 2568.65  | 215.625 | 0.916055126 | 0.2257   | -1.092 |
| 95734_at   | 404.5  | 442    | 458.9  | 431.5  | 431.9  | 433.7  | 324.4  | 501.4   | 0.783018339 | 434.225  | 422.85   | 11.375  | 1.026900792 | 0.7058   | -1.038 |
| 95735_at   | 341.2  | 263.7  | 339.4  | 253.9  | 173.9  | 236.8  | 194.2  | 297.3   | 0.087051695 | 299.55   | 225.55   | 74      | 1.328086899 | 0.0829   | -1.344 |
| 95736_at   | 2027.1 | 1910.5 | 2003.5 | 1659.7 | 2256.9 | 1879.9 | 2027.4 | 1725.5  | 0.627999493 | 1900.2   | 1972.425 | 72.225  | 0.963382638 | 0.645    | -1.036 |
| 95737_at   | 1098.5 | 1320.6 | 1283.3 | 1190.4 | 1337.8 | 1298.7 | 1356.5 | 1408.2  | 0.077762018 | 1223.2   | 1350.3   | 127.1   | 0.905872769 | 0.06407  | -1.106 |
| 95738_at   | 203    | 179.2  | 160.3  | 184.9  | 194.4  | 237.7  | 233    | 148.6   | 0.39093095  | 181.85   | 203.425  | 21.575  | 0.893941256 | 0.4392   | -1.104 |
| 95739_at   | 14.7   | 29.3   | 35     | 20.2   | 30     | 29.6   | 15.1   | 26.7    | 0.926859096 | 24.8     | 25.35    | 0.55    | 0.978303748 | 0.8768   | -1.042 |
| 95740_at   | 148.9  | 151.4  | 230.2  | 202.3  | 226.6  | 205.5  | 216.9  | 229.2   | 0.164580588 | 183.2    | 219.55   | 36.35   | 0.83443407  | 0.1248   | 1.219  |
| 95742_at   | 1401.3 | 1159   | 1289.8 | 1233.3 | 1170.1 | 1242   | 1220.9 | 1178.3  | 0.281005004 | 1270.85  | 1202.825 | 68.025  | 1.056554362 | 0.2582   | -1.054 |
| 95743_at   | 2266.3 | 1738.3 | 1915.9 | 2469.6 | 1035.1 | 1624.9 | 1491   | 2168.7  | 0.125794382 | 2097.525 | 1579.925 | 517.6   | 1.327610488 | 0.1234   | -1.361 |
| 95744_at   | 1093.2 | 789.4  | 590.2  | 901.3  | 780.1  | 928.2  | 687.8  | 865.8   | 0.821985587 | 843.525  | 815.475  | 28.05   | 1.034397131 | 0.9176   | -1.016 |
| 95745_g_at | 788.3  | 581.7  | 521.9  | 608.5  | 461.5  | 666.2  | 587.2  | 642.9   | 0.645019224 | 625.1    | 589.45   | 35.65   | 1.060480109 | 0.6542   | -1.058 |
| 95746_at   | 2326.7 | 1763.8 | 2079.3 | 1821   | 1849   | 2146.8 | 2069.3 | 1706.7  | 0.750598777 | 1997.7   | 1942.95  | 54.75   | 1.0281788   | 0.7656   | -1.026 |
| 95747_at   | 1      | 0.7    | 1.4    | 1.2    | 1.4    | 1.1    | 1      | 0.9     | 0.89694371  | 1.075    | 1.1      | 0.025   | 0.977272727 | 0.8396   | -1.04  |
| 95749_at   | 2676.1 | 2253   | 2778.4 | 2665.9 | 3733.1 | 2490.1 | 2850.4 | 2363.5  | 0.467535052 | 2593.35  | 2859.275 | 265.925 | 0.906995654 | 0.4807   | -1.088 |
| 95750_at   | 695.4  | 647.9  | 523.2  | 686.5  | 705.5  | 505.8  | 634.7  | 650.8   | 0.81669545  | 638.25   | 624.2    | 14.05   | 1.022508811 | 0.8178   | -1.024 |
| 95752_at   | 739.6  | 810.4  | 875    | 710.7  | 1020   | 668.9  | 809.4  | 888.5   | 0.483844929 | 783.925  | 846.7    | 62.775  | 0.925859218 | 0.5179   | -1.071 |
| 95753_at   | 544    | 539.1  | 486.1  | 552.9  | 451.6  | 471.5  | 528.7  | 458.4   | 0.06292807  | 530.525  | 477.55   | 52.975  | 1.110930793 | 0.06137  | -1.112 |
| 95754_at   | 1342.4 | 1673.3 | 1850.9 | 1794   | 1947.4 | 1633.1 | 1740   | 2038.5  | 0.28131636  | 1665.15  | 1839.75  | 174.6   | 0.905095801 | 0.2869   | -1.109 |
| 95755_at   | 683.2  | 894.5  | 947.4  | 964.6  | 799.2  | 908.2  | 893.3  | 934.9   | 0.879463439 | 872.425  | 883.9    | 11.475  | 0.987017762 | 0.8221   | -1.021 |
| 95756_at   | 461.6  | 304.2  | 305.8  | 405.1  | 338.8  | 380.7  | 418.3  | 405     | 0.716804244 | 369.175  | 385.7    | 16.525  | 0.957155821 | 0.635    | -1.059 |
| 95758_at   | 7616.7 | 8146.9 | 6268.4 | 9036.2 | 8749   | 7072.4 | 7002.8 | 11430.1 | 0.534032276 | 7767.05  | 8563.575 | 796.525 | 0.90698686  | 0.559    | -1.089 |
| 95759_at   | 293.7  | 477.2  | 350.8  | 413    | 503.5  | 451.3  | 506.9  | 404.6   | 0.13438454  | 383.675  | 466.575  | 82.9    | 0.822322242 | 0.1274   | 1.231  |
| 95760_at   | 1433.9 | 1528.8 | 1393   | 1289.6 | 1731.9 | 1343.3 | 1320.5 | 1015.9  | 0.726745279 | 1411.325 | 1352.9   | 58.425  | 1.04318501  | 0.6295   | -1.06  |
| 95765_at   | 3865.7 | 3155   | 4075.2 | 3484.5 | 3297.1 | 3206.6 | 3146.1 | 2870.4  | 0.080128938 | 3645.1   | 3130.05  | 515.05  | 1.164550087 | 0.05951  | -1.161 |
| 95766_f_at | 1.3    | 1.5    | 2.3    | 2      | 3      | 1.8    | 1.7    | 1.8     | 0.467455102 | 1.775    | 2.075    | 0.3     | 0.855421687 | 0.4619   | 1.153  |
| 95770_s_at | 28.9   | 40     | 32.5   | 9.4    | 54.4   | 36.2   | 46.3   | 55.1    | 0.047185371 | 27.7     | 48       | 20.3    | 0.577083333 | 0.09747  | 1.941  |
| 95771_i_at | 33.9   | 31.1   | 57.7   | 26.9   | 34.1   | 26.4   | 33.4   | 25.5    | 0.363620533 | 37.4     | 29.85    | 7.55    | 1.252931323 | 0.3397   | -1.209 |
| 95772_r_at | 4.9    | 3.5    | 24.2   | 4.2    | 5.5    | 4.2    | 12.7   | 3.3     | 0.636826784 | 9.2      | 6.425    | 2.775   | 1.431906615 | 0.7931   | -1.157 |
| 95773_at   | 23.3   | 16.7   | 44.2   | 21.6   | 18.8   | 20.1   | 14.3   | 45.5    | 0.855230744 | 26.45    | 24.675   | 1.775   | 1.071935157 | 0.7627   | -1.108 |
| 95775_f_at | 17.7   | 77.5   | 87.4   | 15.9   | 75.2   | 87.1   | 92.1   | 130.2   | 0.092834979 | 49.625   | 96.15    | 46.525  | 0.516120645 | 0.09798  | 2.53   |
| 95781_at   | 136.6  | 160.4  | 140.4  | 185.9  | 149.1  | 199.3  | 183    | 201.8   | 0.148935496 | 155.825  | 183.3    | 27.475  | 0.850109111 | 0.1531   | 1.177  |
| 95782_at   | 146.8  | 148.4  | 117    | 164.2  | 152.8  | 157.6  | 136.2  | 181.2   | 0.379410463 | 144.1    | 156.95   | 12.85   | 0.918126792 | 0.3783   | -1.092 |
| 95783_g_at | 40.4   | 68.3   | 41.5   | 89.1   | 49.3   | 98.7   | 56.9   | 19.1    | 0.856352411 | 59.825   | 56       | 3.825   | 1.068303571 | 0.6905   | -1.178 |
| 95784_at   | 4.1    | 3.9    | 18.3   | 4.6    | 6.8    | 5.1    | 20.6   | 17.7    | 0.392806022 | 7.725    | 12.55    | 4.825   | 0.615537849 | 0.3088   | 1.755  |
| 95785_s_at | 1566.4 | 1353.9 | 1484.5 | 1212   | 1152.7 | 1529.9 | 944.4  | 985.2   | 0.166850725 | 1404.2   | 1153.05  | 251.15  | 1.217813625 | 0.1367   | -1.235 |
| 95786_at   | 44.3   | 5.7    | 14.4   | 8.1    | 15.7   | 16.7   | 15.5   | 10.6    | 0.722808294 | 18.125   | 14.625   | 3.5     | 1.239316239 | 0.8416   | 1.101  |
| 95787_s_at | 1003.2 | 694.6  | 952.2  | 921.9  | 697.3  | 907.9  | 804.8  | 720.9   | 0.238889905 | 892.975  | 782.725  | 110.25  | 1.140854068 | 0.2567   | -1.136 |
| 95791_s_at | 2431.1 | 2973.5 | 2578.7 | 2920.2 | 1864.1 | 2313.8 | 1879.8 | 2450.3  | 0.024414243 | 2725.875 | 2127     | 598.875 | 1.281558533 | 0.02587  | -1.287 |
| 95792_at   | 3.9    | 4.2    | 3.7    | 3.5    | 6.8    | 4.9    | 10.8   | 7.3     | 0.059134134 | 3.825    | 7.45     | 3.625   | 0.513422819 | 0.009293 | 1.881  |
| 95793_at   | 72.5   | 88.4   | 66.8   | 81.9   | 80.8   | 75.6   | 62.1   | 73      | 0.495209188 | 77.4     | 72.875   | 4.525   | 1.062092624 | 0.5083   | -1.061 |
| 95794_f_at | 453.7  | 583.1  | 773.6  | 612.2  | 802.4  | 565.5  | 740    | 837.6   | 0.193840678 | 605.65   | 736.375  | 130.725 | 0.822474962 | 0.2002   | 1.224  |
| 95795_at   | 956.8  | 712.7  | 869.1  | 750    | 702.1  | 820.7  | 736.9  | 659.2   | 0.218009253 | 822.15   | 729.725  | 92.425  | 1.126657302 | 0.2074   | -1.123 |
| 95796_g_at | 2510   | 2151   | 2464.5 | 2395.1 | 2451.7 | 2038.6 | 2328.1 | 2460.7  | 0.651636731 | 2380.15  | 2319.775 | 60.375  | 1.026026231 | 0.6488   | -1.027 |



|            |       |       |       |       |       |       |       |       |             |         |         |         |             |          |        |
|------------|-------|-------|-------|-------|-------|-------|-------|-------|-------------|---------|---------|---------|-------------|----------|--------|
| 95797_f_at | 9.7   | 13.7  | 10.9  | 40.1  | 44.5  | 7.5   | 12.9  | 37.3  | 0.571235186 | 18.6    | 25.55   | 6.95    | 0.727984344 | 0.6497   | 1.291  |
| 95798_f_at | 12.5  | 32    | 5.6   | 10.2  | 47    | 8.7   | 11.5  | 15.1  | 0.626537663 | 15.075  | 20.575  | 5.5     | 0.732685298 | 0.6035   | 1.327  |
| 95799_s_at | 6.7   | 7.5   | 7     | 8.6   | 9.3   | 18.8  | 25.3  | 6.3   | 0.185186802 | 7.45    | 14.925  | 7.475   | 0.499162479 | 0.1379   | 1.743  |
| 95800_s_at | 170.5 | 135.1 | 101.4 | 145.3 | 67.5  | 146.4 | 55.7  | 76    | 0.089134533 | 138.075 | 86.4    | 51.675  | 1.598090278 | 0.0686   | -1.688 |
| 95801_s_at | 518.8 | 393.6 | 414.8 | 484.4 | 313.8 | 409.8 | 208.3 | 367.4 | 0.05617597  | 452.9   | 324.825 | 128.075 | 1.394289233 | 0.06961  | -1.429 |
| 95803_at   | 78.8  | 85.8  | 97.9  | 57.2  | 65    | 101.6 | 89    | 59.2  | 0.928861291 | 79.925  | 78.7    | 1.225   | 1.015565438 | 0.9064   | -1.021 |
| 95804_g_at | 93.6  | 149.9 | 131.6 | 131.8 | 36.5  | 121.4 | 84.9  | 161.4 | 0.425929583 | 126.725 | 101.05  | 25.675  | 1.254082138 | 0.3443   | -1.414 |
| 95805_at   | 318.6 | 344.5 | 382.8 | 367.8 | 508.4 | 446.4 | 473   | 466.1 | 0.000770357 | 353.425 | 473.475 | 120.05  | 0.746449126 | 0.000912 | 1.341  |
| 95806_f_at | 160   | 205   | 182.5 | 158.4 | 146.7 | 153.8 | 121.2 | 169.3 | 0.10208523  | 176.475 | 147.75  | 28.725  | 1.194416244 | 0.1024   | -1.196 |
| 95807_at   | 279.5 | 295.2 | 370.7 | 486.2 | 540.5 | 456.4 | 386.8 | 268.2 | 0.488353645 | 357.9   | 412.975 | 55.075  | 0.866638416 | 0.5143   | 1.145  |
| 95808_g_at | 15.2  | 18    | 16.6  | 13    | 13.4  | 9.1   | 16.1  | 15    | 0.27017879  | 15.7    | 13.4    | 2.3     | 1.171641791 | 0.2769   | -1.188 |
| 95848_at   | 590.1 | 689.4 | 527.9 | 631.9 | 397.8 | 667.3 | 556.9 | 426.2 | 0.230990797 | 609.825 | 512.05  | 97.775  | 1.19094815  | 0.198    | -1.211 |
| 95852_at   | 53.9  | 44.5  | 20.4  | 41.9  | 86    | 55.8  | 50.3  | 96.4  | 0.061107836 | 40.175  | 72.125  | 31.95   | 0.557019064 | 0.06255  | 1.837  |
| 95853_at   | 10    | 1     | 8.2   | 3.1   | 17.4  | 1.5   | 10.4  | 1.8   | 0.636704474 | 5.575   | 7.775   | 2.2     | 0.717041801 | 0.8475   | 1.177  |
| 95854_at   | 5.9   | 3.9   | 21.1  | 21.3  | 51.7  | 19.5  | 19.8  | 21    | 0.166664236 | 13.05   | 28      | 14.95   | 0.466071429 | 0.1123   | 2.528  |
| 95855_at   | 20    | 33.2  | 32.7  | 33.1  | 10.3  | 53.3  | 33.9  | 52.8  | 0.507699141 | 29.75   | 37.575  | 7.825   | 0.791749834 | 0.8524   | -1.082 |
| 95856_at   | 11.7  | 9.3   | 15.4  | 10.9  | 26    | 15    | 17.1  | 3.1   | 0.52221774  | 11.825  | 15.3    | 3.475   | 0.772875817 | 0.9471   | -1.033 |
| 95857_at   | 29.1  | 26.5  | 43.7  | 15.3  | 57.7  | 16    | 8.2   | 40.6  | 0.883867269 | 28.65   | 30.625  | 1.975   | 0.935510204 | 0.8041   | -1.136 |
| 95858_at   | 36.1  | 30.6  | 51.4  | 22.5  | 43.8  | 37.6  | 43.8  | 62.1  | 0.19927947  | 35.15   | 46.825  | 11.675  | 0.750667379 | 0.172    | 1.368  |
| 95861_at   | 59.3  | 77.1  | 71.4  | 93.9  | 73.1  | 81.9  | 94.9  | 109.9 | 0.226619801 | 75.425  | 89.95   | 14.525  | 0.838521401 | 0.2207   | 1.195  |
| 95862_at   | 108.9 | 88.8  | 104.7 | 97.4  | 94.5  | 89.7  | 90.5  | 130.8 | 0.901226053 | 99.95   | 101.375 | 1.425   | 0.98594328  | 0.964    | -1.005 |
| 95863_at   | 45.5  | 13.2  | 27.1  | 13    | 22.3  | 19.8  | 17.7  | 59.7  | 0.696386756 | 24.7    | 29.875  | 5.175   | 0.826778243 | 0.6499   | 1.218  |
| 95864_at   | 6.4   | 3.8   | 17.7  | 3.3   | 7.7   | 6.1   | 1.6   | 10.7  | 0.7557275   | 7.8     | 6.525   | 1.275   | 1.195402299 | 0.8081   | -1.154 |
| 95869_at   | 28.6  | 24.7  | 11.9  | 36.2  | 25.9  | 21.6  | 2.7   | 38.1  | 0.727871228 | 25.35   | 22.075  | 3.275   | 1.148357871 | 0.5377   | -1.524 |
| 95870_at   | 4.1   | 14.7  | 4.9   | 3.6   | 18.8  | 24.8  | 3.6   | 29    | 0.113164848 | 6.825   | 19.05   | 12.225  | 0.358267717 | 0.1494   | 2.604  |
| 95871_at   | 26.7  | 9     | 15.6  | 11    | 17.4  | 12.9  | 19    | 4.7   | 0.698391542 | 15.575  | 13.5    | 2.075   | 1.153703704 | 0.6716   | -1.195 |
| 95872_at   | 82.2  | 121.1 | 119.3 | 146.7 | 88.4  | 86.8  | 61.6  | 191   | 0.758317163 | 117.325 | 106.95  | 10.375  | 1.097007948 | 0.5619   | -1.179 |
| 95875_at   | 89.3  | 64.6  | 113.2 | 83.4  | 125   | 98.3  | 113.7 | 108.5 | 0.096659484 | 87.625  | 111.375 | 23.75   | 0.786756453 | 0.08816  | 1.292  |
| 95876_at   | 182.5 | 109.5 | 177.9 | 69.7  | 97.5  | 154.8 | 254.9 | 174   | 0.438126248 | 134.9   | 170.3   | 35.4    | 0.792131533 | 0.4425   | 1.282  |
| 95877_at   | 87.2  | 87.3  | 102.9 | 99    | 59.1  | 74.3  | 43.1  | 47.6  | 0.005723916 | 94.1    | 56.025  | 38.075  | 1.679607318 | 0.005754 | -1.713 |
| 95878_at   | 9.8   | 5.9   | 5.4   | 25.4  | 29    | 7.5   | 5.3   | 5.3   | 0.984585009 | 11.625  | 11.775  | 0.15    | 0.987261146 | 0.9132   | -1.063 |
| 95879_at   | 74    | 68.1  | 46.1  | 86    | 40.1  | 105.9 | 56.6  | 76.9  | 0.939022467 | 68.55   | 69.875  | 1.325   | 0.981037567 | 0.9397   | -1.02  |
| 95880_s_at | 69.9  | 13.5  | 68.8  | 46.1  | 10.7  | 67.3  | 119.4 | 61    | 0.586995324 | 49.575  | 64.6    | 15.025  | 0.767414861 | 0.8365   | 1.15   |
| 95881_f_at | 88.2  | 133.2 | 128.3 | 175.1 | 173.9 | 125.2 | 134.5 | 149.6 | 0.512807515 | 131.2   | 145.8   | 14.6    | 0.899862826 | 0.4533   | 1.135  |
| 95882_at   | 21.1  | 4.3   | 4.4   | 34.5  | 17.3  | 30.7  | 16.4  | 26.4  | 0.455973358 | 16.075  | 22.7    | 6.625   | 0.70814978  | 0.2546   | 2.016  |
| 95883_at   | 216.6 | 211.5 | 245.7 | 306.4 | 176.5 | 191   | 166.1 | 198.2 | 0.059390585 | 245.05  | 182.95  | 62.1    | 1.339437005 | 0.02318  | -1.328 |
| 95884_at   | 12.1  | 7.8   | 31.5  | 35.5  | 7.6   | 62    | 29.5  | 27.4  | 0.487497725 | 21.725  | 31.625  | 9.9     | 0.686956522 | 0.5945   | 1.379  |
| 95885_at   | 224   | 236.8 | 228   | 233.6 | 226.8 | 285.8 | 196   | 176.3 | 0.722265069 | 230.6   | 221.225 | 9.375   | 1.04237767  | 0.6012   | -1.06  |
| 95886_g_at | 474.9 | 601.9 | 433.5 | 521.9 | 439.9 | 542.8 | 500.1 | 604.4 | 0.792885174 | 508.05  | 521.8   | 13.75   | 0.973648908 | 0.7865   | -1.028 |
| 95887_at   | 50.6  | 78.3  | 59.2  | 114.9 | 115.8 | 78.9  | 72.4  | 105.7 | 0.365048172 | 75.75   | 93.2    | 17.45   | 0.81276824  | 0.3041   | 1.27   |
| 95888_at   | 46    | 21.7  | 21.6  | 56.7  | 12.6  | 57.1  | 25.3  | 20.3  | 0.581990821 | 36.5    | 28.825  | 7.675   | 1.266261925 | 0.4884   | -1.347 |
| 95889_at   | 287.6 | 264.4 | 371.7 | 325   | 283.7 | 386.6 | 293.9 | 357.9 | 0.610773521 | 312.175 | 330.525 | 18.35   | 0.944482263 | 0.6093   | -1.059 |
| 95890_r_at | 12.6  | 7.4   | 5.7   | 21.6  | 35.2  | 17.3  | 10.7  | 19.2  | 0.219494862 | 11.825  | 20.6    | 8.775   | 0.574029126 | 0.1706   | 1.819  |
| 95891_at   | 95.6  | 81.7  | 113.4 | 111.6 | 140.6 | 102.6 | 135.5 | 120.6 | 0.077034101 | 100.575 | 124.825 | 24.25   | 0.805728019 | 0.08234  | 1.243  |
| 95892_at   | 4.1   | 19.7  | 14.4  | 12.7  | 5.4   | 2.5   | 24.1  | 27.9  | 0.769086782 | 12.725  | 14.975  | 2.25    | 0.849749583 | 0.8662   | -1.127 |
| 95893_at   | 37.2  | 57.3  | 42.4  | 76.1  | 70.8  | 71.8  | 57.7  | 58.2  | 0.297190932 | 53.25   | 64.625  | 11.375  | 0.823984526 | 0.2327   | 1.255  |
| 95894_at   | 73.9  | 94    | 78.1  | 87.9  | 45.2  | 66.7  | 75.2  | 81.9  | 0.140733468 | 83.475  | 67.25   | 16.225  | 1.241263941 | 0.1488   | -1.265 |
| 95895_at   | 49.8  | 58.6  | 42.1  | 54.4  | 49    | 63.6  | 62.9  | 13.7  | 0.766020976 | 51.225  | 47.3    | 3.925   | 1.082980973 | 0.5644   | -1.255 |
| 95896_at   | 158.6 | 128.9 | 104.6 | 128.8 | 129.3 | 169.9 | 112.2 | 177.4 | 0.415116831 | 130.225 | 147.2   | 16.975  | 0.884680707 | 0.4371   | 1.123  |
| 95897_at   | 416.1 | 478.3 | 375.8 | 536.8 | 602.3 | 704.5 | 757.6 | 545.3 | 0.017295838 | 451.75  | 652.425 | 200.675 | 0.692416753 | 0.01429  | 1.445  |
| 95898_at   | 22    | 34.2  | 29.3  | 28    | 33.9  | 25    | 35.4  | 19.3  | 0.995827163 | 28.375  | 28.4    | 0.025   | 0.999119718 | 0.9241   | -1.017 |
| 95901_f_at | 33.4  | 52.4  | 41.4  | 78.1  | 23.6  | 52.7  | 51.7  | 31.9  | 0.388963594 | 51.325  | 39.975  | 11.35   | 1.283927455 | 0.3774   | -1.289 |
| 95902_at   | 115.4 | 141.9 | 145.3 | 191.7 | 98.4  | 175.5 | 88.6  | 119.8 | 0.308552944 | 148.575 | 120.575 | 28      | 1.23222061  | 0.2601   | -1.256 |
| 95903_at   | 108.5 | 89.4  | 83.9  | 102.4 | 10.8  | 95.4  | 40.8  | 66.9  | 0.095628821 | 96.05   | 53.475  | 42.575  | 1.796166433 | 0.1286   | -2.334 |
| 95904_at   | 70.3  | 106.1 | 98.5  | 99.5  | 105.7 | 134.1 | 101.8 | 99.5  | 0.190764468 | 93.6    | 110.275 | 16.675  | 0.848787123 | 0.1956   | 1.183  |
| 95905_at   | 24.4  | 71.5  | 61    | 34    | 41    | 45.7  | 42.1  | 24.5  | 0.478208611 | 47.725  | 38.325  | 9.4     | 1.245270711 | 0.607    | -1.169 |



|            |       |       |       |       |       |       |       |       |             |         |         |        |             |          |        |
|------------|-------|-------|-------|-------|-------|-------|-------|-------|-------------|---------|---------|--------|-------------|----------|--------|
| 95906_at   | 29.7  | 9.6   | 72.9  | 64    | 10.3  | 16    | 33.2  | 92.3  | 0.80740113  | 44.05   | 37.95   | 6.1    | 1.160737813 | 0.7318   | -1.271 |
| 95907_at   | 167.1 | 173.3 | 186.4 | 209.3 | 165.3 | 288.1 | 176.8 | 226.6 | 0.369319876 | 184.025 | 214.2   | 30.175 | 0.859126984 | 0.3739   | 1.14   |
| 95908_at   | 13.9  | 3.3   | 13.2  | 9.7   | 12.7  | 7.1   | 9.7   | 5.5   | 0.676972668 | 10.025  | 8.75    | 1.275  | 1.145714286 | 0.8937   | -1.055 |
| 95909_at   | 4.8   | 5.6   | 6.1   | 26.8  | 9.2   | 4.6   | 35.2  | 9.3   | 0.684811599 | 10.825  | 14.575  | 3.75   | 0.74271012  | 0.6414   | 1.332  |
| 95910_f_at | 420.5 | 410.1 | 484.4 | 477.5 | 306.8 | 416.6 | 418.8 | 537   | 0.606741552 | 448.125 | 419.8   | 28.325 | 1.067472606 | 0.528    | -1.085 |
| 95911_at   | 20.4  | 55.4  | 22.3  | 49.7  | 6.8   | 42.6  | 35    | 38.9  | 0.634084373 | 36.95   | 30.825  | 6.125  | 1.198702352 | 0.5909   | -1.335 |
| 95912_at   | 152.9 | 148.3 | 177.2 | 149.3 | 111   | 158.1 | 144.1 | 122.7 | 0.126182485 | 156.925 | 133.975 | 22.95  | 1.171300616 | 0.1159   | -1.179 |
| 95913_at   | 137.6 | 117.9 | 114.9 | 154.3 | 196.5 | 169.1 | 200.9 | 257.1 | 0.018896418 | 131.175 | 205.9   | 74.725 | 0.637081107 | 0.006895 | 1.563  |
| 95914_at   | 212.1 | 275.1 | 248   | 261.9 | 246.5 | 204.6 | 302.9 | 221.7 | 0.841312479 | 249.275 | 243.925 | 5.35   | 1.021932971 | 0.7916   | -1.029 |
| 95915_at   | 151.1 | 159.3 | 166.8 | 166.2 | 166.6 | 145.1 | 110.5 | 209.7 | 0.899667346 | 160.85  | 157.975 | 2.875  | 1.018199082 | 0.7593   | -1.045 |
| 95916_at   | 33.8  | 45.9  | 37.1  | 68.6  | 46.9  | 22.7  | 33.6  | 54.4  | 0.534249788 | 46.35   | 39.4    | 6.95   | 1.176395939 | 0.5076   | -1.193 |
| 95917_at   | 35.3  | 7.5   | 7.6   | 53.6  | 28.6  | 30.5  | 15.1  | 64.8  | 0.592385494 | 26      | 34.75   | 8.75   | 0.748201439 | 0.4167   | 1.679  |
| 95919_at   | 19.4  | 10.9  | 12.7  | 12.7  | 12.9  | 10.9  | 11.6  | 21.9  | 0.904115622 | 13.925  | 14.325  | 0.4    | 0.972076789 | 0.9623   | -1.01  |
| 95920_at   | 34.9  | 38.6  | 34.5  | 29.8  | 8.5   | 39.8  | 45.5  | 10.9  | 0.455183865 | 34.45   | 26.175  | 8.275  | 1.316141356 | 0.2718   | -1.694 |
| 95923_at   | 45.2  | 41.9  | 54.2  | 45.3  | 68.9  | 51    | 58.4  | 23.7  | 0.723120517 | 46.65   | 50.5    | 3.85   | 0.923762376 | 0.9638   | -1.012 |
| 95924_at   | 135.1 | 182.1 | 207.9 | 212.5 | 198.4 | 199.9 | 203.1 | 178.2 | 0.606071915 | 184.4   | 194.9   | 10.5   | 0.946126219 | 0.5453   | -1.072 |
| 95925_at   | 8     | 23.6  | 24.3  | 19.4  | 12    | 37.7  | 26    | 12.4  | 0.67609039  | 18.825  | 22.025  | 3.2    | 0.854710556 | 0.7592   | 1.132  |
| 95926_at   | 20.1  | 35.2  | 50.5  | 33.7  | 26    | 15.5  | 39.6  | 42.1  | 0.659112762 | 34.875  | 30.8    | 4.075  | 1.132305195 | 0.6418   | -1.158 |
| 95927_f_at | 172.7 | 156.8 | 155.6 | 180.3 | 184.6 | 232.9 | 201.6 | 219.1 | 0.017291881 | 166.35  | 209.55  | 43.2   | 0.793843951 | 0.01033  | 1.257  |
| 95929_at   | 58.8  | 79.3  | 132.9 | 54    | 47.8  | 96.3  | 80.6  | 116.3 | 0.868738089 | 81.25   | 85.25   | 4      | 0.953079179 | 0.8288   | -1.065 |
| 95930_at   | 10.2  | 7.7   | 7.9   | 9.2   | 6.1   | 19.9  | 5.1   | 14.8  | 0.501717872 | 8.75    | 11.475  | 2.725  | 0.762527233 | 0.7372   | -1.126 |
| 95931_at   | 46.2  | 38    | 30.1  | 46.1  | 27.6  | 31.5  | 49.2  | 65.7  | 0.739933509 | 40.1    | 43.5    | 3.4    | 0.92183908  | 0.8777   | -1.037 |
| 95932_at   | 63.8  | 84.7  | 62.8  | 57.2  | 93.1  | 24.8  | 31.5  | 53.3  | 0.377456091 | 67.125  | 50.675  | 16.45  | 1.324617662 | 0.2363   | -1.496 |
| 95933_f_at | 227.4 | 273.2 | 217.1 | 216.9 | 196.1 | 203.5 | 277.1 | 215.3 | 0.658667342 | 233.65  | 223     | 10.65  | 1.047757848 | 0.6076   | -1.053 |
| 95934_at   | 3.4   | 1.6   | 2.5   | 7.2   | 7.6   | 4.9   | 5.3   | 3.9   | 0.283174003 | 3.675   | 5.425   | 1.75   | 0.677419355 | 0.1832   | 1.691  |
| 95935_at   | 15.8  | 33.8  | 19.3  | 50.9  | 30.2  | 20.4  | 22.2  | 25.8  | 0.562448754 | 29.95   | 24.65   | 5.3    | 1.215010142 | 0.7339   | -1.105 |
| 95936_at   | 48.2  | 36.1  | 41.4  | 58.5  | 63    | 43.8  | 85.2  | 53.5  | 0.193648355 | 46.05   | 61.375  | 15.325 | 0.750305499 | 0.1677   | 1.315  |
| 95937_at   | 79.5  | 80.6  | 93.3  | 35.2  | 17.1  | 52.7  | 50.8  | 110   | 0.556489936 | 72.15   | 57.65   | 14.5   | 1.25151778  | 0.4507   | -1.429 |
| 95938_at   | 110   | 49.5  | 121.8 | 192.2 | 88.7  | 85.8  | 92.9  | 141.2 | 0.638475099 | 118.375 | 102.15  | 16.225 | 1.158835047 | 0.8469   | -1.063 |
| 95939_i_at | 170.7 | 149.1 | 177.3 | 171   | 69.7  | 110.6 | 89.1  | 124.3 | 0.005200496 | 167.025 | 98.425  | 68.6   | 1.696977394 | 0.006103 | -1.734 |
| 95940_f_at | 203.2 | 135   | 135.5 | 170.6 | 78.7  | 77.9  | 61.1  | 65.4  | 0.008988016 | 161.075 | 70.775  | 90.3   | 2.275874249 | 0.00045  | -2.256 |
| 95941_at   | 5.2   | 7     | 3.7   | 17.7  | 28.7  | 9.3   | 16.5  | 24.3  | 0.082359582 | 8.4     | 19.7    | 11.3   | 0.426395939 | 0.06344  | 2.581  |
| 95943_at   | 16.1  | 12.8  | 51    | 22.9  | 24.8  | 22.1  | 13.4  | 49.1  | 0.891402019 | 25.7    | 27.35   | 1.65   | 0.939670932 | 0.8119   | -1.105 |
| 95944_at   | 702.7 | 515   | 510.6 | 722.9 | 510.5 | 666.3 | 415.7 | 913.4 | 0.916289119 | 612.8   | 626.475 | 13.675 | 0.978171515 | 0.9669   | -1.008 |
| 95945_at   | 8.3   | 14    | 22.2  | 14.5  | 38.6  | 17.8  | 22.3  | 17    | 0.176462218 | 14.75   | 23.925  | 9.175  | 0.616509927 | 0.1297   | 1.62   |
| 95946_at   | 37.2  | 39.3  | 53.5  | 45.4  | 90.8  | 38.7  | 31.4  | 15.6  | 0.987802369 | 43.85   | 44.125  | 0.275  | 0.993767705 | 0.6417   | -1.2   |
| 95947_at   | 2.2   | 1.2   | 1.9   | 1.7   | 1.5   | 1.5   | 1.7   | 1     | 0.259027401 | 1.75    | 1.425   | 0.325  | 1.228070175 | 0.258    | -1.247 |
| 95948_at   | 84.9  | 35.6  | 78.8  | 75.6  | 64.8  | 59.5  | 78.2  | 63    | 0.853991461 | 68.725  | 66.375  | 2.35   | 1.035404896 | 0.9504   | -1.014 |
| 95949_at   | 104.8 | 48.1  | 55.5  | 64.3  | 82.4  | 70.7  | 62.4  | 82.4  | 0.667074669 | 68.175  | 74.475  | 6.3    | 0.915407855 | 0.5083   | 1.137  |
| 95950_at   | 2.9   | 14.4  | 17.8  | 15.6  | 32.1  | 12.1  | 24.2  | 10.7  | 0.295179923 | 12.675  | 19.775  | 7.1    | 0.640960809 | 0.326    | 1.716  |
| 95951_at   | 83.2  | 107.1 | 77    | 92.4  | 84.1  | 71.1  | 75.1  | 65.2  | 0.090614607 | 89.925  | 73.875  | 16.05  | 1.217258883 | 0.07369  | -1.213 |
| 95952_at   | 163.1 | 123.2 | 125   | 178.8 | 151.3 | 146   | 140.7 | 185.2 | 0.648131753 | 147.525 | 155.8   | 8.275  | 0.946887035 | 0.6005   | -1.064 |
| 95953_at   | 105.4 | 124.4 | 133.2 | 148.8 | 126.3 | 111.3 | 108.2 | 274.7 | 0.551355922 | 127.95  | 155.125 | 27.175 | 0.824818695 | 0.6265   | 1.126  |
| 95954_at   | 42.7  | 51.5  | 41.7  | 54.1  | 41.1  | 25.5  | 12.7  | 44.6  | 0.107187756 | 47.5    | 30.975  | 16.525 | 1.533494754 | 0.1227   | -1.699 |
| 95955_at   | 13.3  | 48.3  | 47.2  | 44.6  | 42.5  | 71.3  | 57    | 63.7  | 0.103097524 | 38.35   | 58.625  | 20.275 | 0.654157783 | 0.1665   | 1.688  |
| 95956_at   | 38    | 33.3  | 35.5  | 53.7  | 44.5  | 41.9  | 55.1  | 27.4  | 0.784994719 | 40.125  | 42.225  | 2.1    | 0.95026643  | 0.8375   | -1.039 |
| 95957_at   | 16.5  | 28    | 36.6  | 28    | 41.9  | 15.2  | 28.8  | 29.1  | 0.836825705 | 27.275  | 28.75   | 1.475  | 0.948695652 | 0.9195   | -1.029 |
| 95958_at   | 1.3   | 25.8  | 4.7   | 4.4   | 30.1  | 13    | 7.5   | 6.3   | 0.535094426 | 9.05    | 14.225  | 5.175  | 0.636203866 | 0.2909   | 2.268  |
| 95959_at   | 14.2  | 18.9  | 27.4  | 34    | 4.6   | 42.9  | 11.9  | 12    | 0.576468415 | 23.625  | 17.85   | 5.775  | 1.323529412 | 0.3163   | -1.721 |
| 95960_at   | 4.3   | 13.1  | 6.5   | 40.3  | 33.7  | 9.7   | 21    | 13.6  | 0.739808723 | 16.05   | 19.5    | 3.45   | 0.823076923 | 0.4423   | 1.583  |
| 95961_at   | 25.3  | 53.2  | 23.5  | 22.2  | 31.7  | 20.9  | 28    | 35.6  | 0.815782477 | 31.05   | 29.05   | 2      | 1.068846816 | 0.9525   | -1.015 |
| 95962_at   | 25.7  | 35.8  | 31.6  | 52.4  | 35.1  | 63.8  | 42.4  | 55.4  | 0.188510208 | 36.375  | 49.175  | 12.8   | 0.739705135 | 0.174    | 1.363  |
| 95963_at   | 242.5 | 206.1 | 187.9 | 208.2 | 241.6 | 187.4 | 135.5 | 204.6 | 0.484291388 | 211.175 | 192.275 | 18.9   | 1.09829671  | 0.4356   | -1.117 |
| 95964_at   | 64.2  | 35.5  | 64.5  | 84.4  | 102.9 | 85.1  | 51.1  | 149.9 | 0.194439816 | 62.15   | 97.25   | 35.1   | 0.63907455  | 0.1943   | 1.525  |
| 95965_at   | 21.5  | 33.6  | 7.6   | 8.1   | 24.9  | 25.8  | 8.4   | 23.5  | 0.707443429 | 17.7    | 20.65   | 2.95   | 0.857142857 | 0.5873   | 1.299  |
| 95966_at   | 2.4   | 4     | 0.7   | 3.9   | 17.6  | 0.8   | 11.9  | 1.5   | 0.295524245 | 2.75    | 7.95    | 5.2    | 0.34591195  | 0.541    | 1.747  |



|            |        |        |        |        |        |        |        |        |             |          |          |         |             |          |        |
|------------|--------|--------|--------|--------|--------|--------|--------|--------|-------------|----------|----------|---------|-------------|----------|--------|
| 95967_at   | 7      | 15.1   | 30.3   | 4.6    | 34.4   | 10.7   | 40.6   | 10.7   | 0.354666132 | 14.25    | 24.1     | 9.85    | 0.591286307 | 0.3207   | 1.82   |
| 95968_at   | 46     | 29.2   | 4.6    | 29.3   | 13.1   | 38.4   | 9.4    | 36.7   | 0.810180097 | 27.275   | 24.4     | 2.875   | 1.117827869 | 0.9872   | -1.01  |
| 95970_at   | 9.9    | 17.3   | 8.2    | 7.7    | 11.5   | 9.3    | 9      | 7.8    | 0.592989071 | 10.775   | 9.4      | 1.375   | 1.146276596 | 0.6707   | -1.094 |
| 95971_at   | 49.1   | 39.7   | 63.6   | 47.5   | 83.9   | 34.5   | 40.1   | 43.7   | 0.9649708   | 49.975   | 50.55    | 0.575   | 0.988625124 | 0.8707   | -1.038 |
| 95972_at   | 17.2   | 27.4   | 18.7   | 21.3   | 32.3   | 16.9   | 10.1   | 25.2   | 0.996473594 | 21.15    | 21.125   | 0.025   | 1.001183432 | 0.791    | -1.079 |
| 95973_at   | 3.3    | 3.5    | 17.7   | 2.9    | 3.7    | 14.3   | 1.9    | 16.3   | 0.683571065 | 6.85     | 9.05     | 2.2     | 0.756906077 | 0.7209   | 1.288  |
| 95974_at   | 2.5    | 2.4    | 3.6    | 3.3    | 2.7    | 3.1    | 4.3    | 3.5    | 0.35849517  | 2.95     | 3.4      | 0.45    | 0.867647059 | 0.3334   | 1.153  |
| 95975_at   | 10.4   | 23.6   | 12     | 6.3    | 38.9   | 33.7   | 25.1   | 21.5   | 0.021808697 | 13.075   | 29.8     | 16.725  | 0.438758389 | 0.0238   | 2.485  |
| 95976_at   | 5.5    | 6.5    | 7.1    | 7.7    | 6.3    | 7      | 15.7   | 7      | 0.383402971 | 6.7      | 9        | 2.3     | 0.744444444 | 0.359    | 1.249  |
| 95977_at   | 3.8    | 18.2   | 2.6    | 17.8   | 2.6    | 4.8    | 4      | 4.4    | 0.218096274 | 10.6     | 3.95     | 6.65    | 2.683544304 | 0.2476   | -1.967 |
| 95978_at   | 102.4  | 71.7   | 106.8  | 99.4   | 59.3   | 96.3   | 79.9   | 73.4   | 0.157165584 | 95.075   | 77.225   | 17.85   | 1.231142765 | 0.1725   | -1.234 |
| 95979_at   | 10.6   | 10.9   | 14.2   | 6.8    | 11.6   | 5.2    | 9.8    | 9.1    | 0.434235602 | 10.625   | 8.925    | 1.7     | 1.19047619  | 0.4509   | -1.204 |
| 95980_at   | 50.1   | 9.1    | 34     | 37.3   | 62.6   | 43.3   | 52.6   | 51.1   | 0.100749207 | 32.625   | 52.4     | 19.775  | 0.622614504 | 0.1518   | 1.883  |
| 95981_at   | 109.5  | 71.8   | 63.5   | 90.6   | 85.4   | 80.4   | 62.9   | 115.2  | 0.891611888 | 83.85    | 85.975   | 2.125   | 0.975283513 | 0.8974   | -1.024 |
| 95982_at   | 146.9  | 112.8  | 185    | 127.9  | 128.5  | 162.9  | 128.9  | 128.6  | 0.753574026 | 143.15   | 137.225  | 5.925   | 1.043177264 | 0.8087   | -1.031 |
| 95983_at   | 39.8   | 17.9   | 34.5   | 18.9   | 42.7   | 26.2   | 31.6   | 28.8   | 0.520786834 | 27.775   | 32.325   | 4.55    | 0.859242073 | 0.4302   | 1.215  |
| 95984_at   | 71.6   | 90.4   | 87.3   | 95.3   | 31.1   | 65.2   | 63.7   | 81.1   | 0.085506681 | 86.15    | 60.275   | 25.875  | 1.429282455 | 0.1095   | -1.506 |
| 95985_at   | 6.8    | 10.1   | 12.1   | 10.5   | 11.2   | 8.8    | 9.5    | 9      | 0.849129653 | 9.875    | 9.625    | 0.25    | 1.025974026 | 0.9511   | -1.009 |
| 95986_at   | 163.6  | 208    | 188.8  | 234.7  | 226.9  | 188.5  | 170.9  | 203.6  | 0.94820948  | 198.775  | 197.475  | 1.3     | 1.006583112 | 0.9746   | -1.003 |
| 95987_at   | 5.7    | 16.5   | 8.5    | 31.6   | 8.5    | 30.8   | 7.2    | 5.5    | 0.767625664 | 15.575   | 13       | 2.575   | 1.198076923 | 0.6892   | -1.253 |
| 95988_r_at | 3.2    | 5.9    | 1.6    | 10.4   | 10     | 4.1    | 1.6    | 9      | 0.756598358 | 5.275    | 6.175    | 0.9     | 0.854251012 | 0.8077   | 1.16   |
| 95989_at   | 48.1   | 55.2   | 68.9   | 71.4   | 60.3   | 83.9   | 77.2   | 31.7   | 0.86224613  | 60.9     | 63.275   | 2.375   | 0.962465429 | 0.9561   | -1.014 |
| 95990_at   | 10.5   | 9      | 10.8   | 11.1   | 10     | 14     | 9.6    | 14.9   | 0.288898309 | 10.35    | 12.125   | 1.775   | 0.853608247 | 0.2873   | 1.153  |
| 95991_at   | 5.6    | 20.1   | 15.3   | 5.9    | 13.2   | 10.3   | 14.5   | 3.8    | 0.778616422 | 11.725   | 10.45    | 1.275   | 1.122009569 | 0.8698   | -1.08  |
| 95992_at   | 62.1   | 15.1   | 31.1   | 54.2   | 70.7   | 27     | 54.6   | 14.5   | 0.950857529 | 40.625   | 41.7     | 1.075   | 0.974220624 | 0.9817   | -1.012 |
| 95994_at   | 58.1   | 52.8   | 53     | 59.2   | 69.8   | 56.8   | 50.3   | 78.5   | 0.296545612 | 55.775   | 63.85    | 8.075   | 0.873531715 | 0.2902   | 1.129  |
| 95995_at   | 14.4   | 7.2    | 30.3   | 10     | 13.5   | 5.1    | 8.6    | 5.7    | 0.261319209 | 15.475   | 8.225    | 7.25    | 1.881458967 | 0.1937   | -1.743 |
| 95996_at   | 18     | 13.4   | 27.5   | 46.2   | 28.7   | 7.7    | 30.8   | 30.1   | 0.83867156  | 26.275   | 24.325   | 1.95    | 1.08016444  | 0.8259   | -1.104 |
| 95997_at   | 13.3   | 10.8   | 12     | 16.7   | 17.7   | 28.9   | 16     | 20.2   | 0.072886123 | 13.2     | 20.7     | 7.5     | 0.637681159 | 0.03432  | 1.544  |
| 95998_at   | 15.9   | 53.4   | 35.8   | 42.8   | 32.2   | 30     | 16.2   | 24.4   | 0.260579221 | 36.975   | 25.7     | 11.275  | 1.438715953 | 0.3537   | -1.359 |
| 95999_at   | 13.4   | 12.9   | 20.1   | 13.4   | 19.5   | 12.4   | 16     | 13.3   | 0.886340624 | 14.95    | 15.3     | 0.35    | 0.977124183 | 0.8556   | -1.028 |
| 96000_at   | 6.7    | 2      | 4.7    | 3.2    | 11.8   | 10.2   | 8.7    | 9.9    | 0.003949673 | 4.15     | 10.15    | 6       | 0.408866995 | 0.009704 | 2.675  |
| 96001_at   | 768.1  | 802.3  | 822.1  | 911.2  | 752.8  | 863.1  | 855.3  | 1029.3 | 0.485194152 | 825.925  | 875.125  | 49.2    | 0.94377946  | 0.4955   | -1.055 |
| 96002_at   | 620.8  | 410.7  | 421.7  | 488.4  | 360.3  | 485.4  | 424.3  | 508.4  | 0.515639739 | 485.4    | 444.6    | 40.8    | 1.091767881 | 0.5239   | -1.086 |
| 96003_at   | 578.2  | 950.5  | 627.5  | 712.9  | 797.4  | 606.1  | 899.4  | 793.2  | 0.602264463 | 717.275  | 774.025  | 56.75   | 0.926681955 | 0.5604   | -1.088 |
| 96004_at   | 967.1  | 936.7  | 1126.3 | 945    | 1236.9 | 965.1  | 969.5  | 986.1  | 0.590426497 | 993.775  | 1039.4   | 45.625  | 0.956104483 | 0.5896   | -1.043 |
| 96007_at   | 7213.9 | 6307.9 | 6987.4 | 6467.7 | 5741.9 | 7228.4 | 6658.6 | 5780   | 0.393660459 | 6744.225 | 6352.225 | 392     | 1.06171066  | 0.3653   | -1.065 |
| 96008_at   | 5807.4 | 4256.4 | 5054   | 4396.5 | 4588.3 | 4701.2 | 4777.5 | 4602.1 | 0.595245112 | 4878.575 | 4667.275 | 211.3   | 1.04527267  | 0.6274   | -1.037 |
| 96009_s_at | 117.3  | 105.7  | 135.8  | 188.6  | 97     | 111.6  | 107.7  | 140.2  | 0.324587765 | 136.85   | 114.125  | 22.725  | 1.199123768 | 0.3044   | -1.181 |
| 96010_at   | 2010.6 | 1579.2 | 1628.2 | 1603.5 | 1395.1 | 1670.5 | 1614.7 | 1564   | 0.27869634  | 1705.375 | 1561.075 | 144.3   | 1.092436302 | 0.2612   | -1.089 |
| 96011_at   | 1943.3 | 1279.2 | 1625.3 | 1632.7 | 1006.2 | 1614.1 | 1281.4 | 1181.7 | 0.11021719  | 1620.125 | 1270.85  | 349.275 | 1.27483574  | 0.1078   | -1.28  |
| 96012_f_at | 7533.2 | 7149.1 | 7409   | 7199.3 | 9157.1 | 7290.2 | 8404.9 | 7298.5 | 0.21495724  | 7322.65  | 8037.675 | 715.025 | 0.911040817 | 0.1734   | -1.093 |
| 96013_r_at | 233.8  | 165.1  | 244    | 306.7  | 194.6  | 297.9  | 271.7  | 202    | 0.918075629 | 237.4    | 241.55   | 4.15    | 0.982819292 | 0.8891   | -1.024 |
| 96014_at   | 941.4  | 917.9  | 839.8  | 727.3  | 976.9  | 976.6  | 787.3  | 753.9  | 0.83201778  | 856.6    | 873.675  | 17.075  | 0.980456119 | 0.8523   | -1.018 |
| 96016_at   | 4632.2 | 4983   | 4574.1 | 3958.4 | 5415.7 | 4138.4 | 3410   | 4131.1 | 0.601314519 | 4536.925 | 4273.8   | 263.125 | 1.06156699  | 0.535    | -1.073 |
| 96017_at   | 1695.5 | 2051.7 | 1810.5 | 1300.9 | 2971.2 | 1800.9 | 1980.4 | 1993.7 | 0.187657929 | 1714.65  | 2186.55  | 471.9   | 0.784180558 | 0.1583   | 1.267  |
| 96018_r_at | 243.1  | 328.5  | 364    | 270.3  | 353.5  | 291.7  | 264.8  | 268.5  | 0.848540607 | 301.475  | 294.625  | 6.85    | 1.023249894 | 0.8824   | -1.018 |
| 96019_at   | 3505.7 | 2721.5 | 3450.2 | 2386   | 1445.9 | 3088.5 | 2761.9 | 1899.9 | 0.181702016 | 3015.85  | 2299.05  | 716.8   | 1.311780953 | 0.1774   | -1.353 |
| 96020_at   | 420    | 325.4  | 452.8  | 454.5  | 525.2  | 416.5  | 440.6  | 488.6  | 0.212266747 | 413.175  | 467.725  | 54.55   | 0.883371639 | 0.2211   | 1.137  |
| 96021_at   | 1163.3 | 1174.8 | 1244   | 936.9  | 1464   | 1110.4 | 1274.3 | 1020.4 | 0.490551221 | 1129.75  | 1217.275 | 87.525  | 0.928097595 | 0.5091   | -1.073 |
| 96023_at   | 74.8   | 129.6  | 118.2  | 133.2  | 124.9  | 132.9  | 150.4  | 138.5  | 0.192509272 | 113.95   | 136.675  | 22.725  | 0.833729651 | 0.1942   | 1.227  |
| 96024_at   | 2958.8 | 3060.8 | 2875.1 | 2790   | 3262.1 | 2854   | 3016.8 | 2955.4 | 0.375976149 | 2921.175 | 3022.075 | 100.9   | 0.966612344 | 0.3719   | -1.034 |
| 96025_g_at | 4232.5 | 4371.5 | 3823.5 | 3777.5 | 5220.3 | 3951.7 | 3987.2 | 3857.7 | 0.597065381 | 4051.25  | 4254.225 | 202.975 | 0.952288607 | 0.6107   | -1.044 |
| 96026_at   | 347.4  | 291.6  | 290.9  | 328.5  | 308.3  | 395.1  | 331    | 342.5  | 0.250564827 | 314.6    | 344.225  | 29.625  | 0.913937105 | 0.2423   | -1.093 |
| 96027_at   | 328.3  | 548.5  | 335.7  | 433.7  | 283.8  | 415.9  | 361.6  | 414.2  | 0.510548568 | 411.55   | 368.875  | 42.675  | 1.115689597 | 0.5371   | -1.104 |
| 96028_at   | 16     | 9.7    | 11.9   | 15.8   | 18.5   | 13.8   | 13.4   | 17.7   | 0.263786    | 13.35    | 15.85    | 2.5     | 0.842271293 | 0.2648   | 1.198  |



|            |        |        |        |        |        |        |        |        |             |          |          |         |             |          |        |
|------------|--------|--------|--------|--------|--------|--------|--------|--------|-------------|----------|----------|---------|-------------|----------|--------|
| 96029_at   | 2218.9 | 1723.4 | 1802.9 | 2074.7 | 1468.3 | 1727.3 | 1664.1 | 1693.3 | 0.064764108 | 1954.975 | 1638.25  | 316.725 | 1.193331299 | 0.04688  | -1.189 |
| 96030_at   | 7.1    | 22.8   | 31.6   | 13.3   | 18     | 34.4   | 6.4    | 7      | 0.79984124  | 18.7     | 16.45    | 2.25    | 1.136778116 | 0.6836   | -1.249 |
| 96031_r_at | 169.3  | 100.6  | 143.1  | 164.8  | 91.3   | 188.5  | 101.6  | 94.6   | 0.404117049 | 144.45   | 119      | 25.45   | 1.213865546 | 0.3289   | -1.248 |
| 96032_at   | 100.1  | 131.9  | 109.5  | 86.2   | 108.6  | 103    | 92.4   | 138.1  | 0.801665335 | 106.925  | 110.525  | 3.6     | 0.967428184 | 0.7918   | -1.034 |
| 96033_at   | 108.9  | 108.3  | 109.8  | 68.4   | 50.3   | 129.9  | 120.9  | 108.2  | 0.872884849 | 98.85    | 102.325  | 3.475   | 0.96603958  | 0.9718   | -1.009 |
| 96035_at   | 510.4  | 540.5  | 516.8  | 484.7  | 714.8  | 608.9  | 620.3  | 645.9  | 0.005652096 | 513.1    | 647.475  | 134.375 | 0.792463029 | 0.001549 | 1.26   |
| 96036_at   | 5.5    | 5.9    | 9      | 5.5    | 4      | 3.6    | 6.9    | 6.4    | 0.333226964 | 6.475    | 5.225    | 1.25    | 1.23923445  | 0.2889   | -1.267 |
| 96037_at   | 1079.8 | 2351.3 | 1407.5 | 1385.3 | 1908.9 | 1817.2 | 1673.9 | 1747.6 | 0.466497011 | 1555.975 | 1786.9   | 230.925 | 0.87076781  | 0.3207   | 1.197  |
| 96038_at   | 972.9  | 883.1  | 857.1  | 811.5  | 956.3  | 982.9  | 937.4  | 871.5  | 0.231795982 | 881.15   | 937.025  | 55.875  | 0.940369787 | 0.221    | -1.065 |
| 96041_at   | 7609.7 | 6740.7 | 6904.9 | 7663.8 | 8555.2 | 6980.2 | 7349.7 | 6699   | 0.73994451  | 7229.775 | 7396.025 | 166.25  | 0.977521709 | 0.7614   | -1.02  |
| 96042_at   | 411.5  | 335.4  | 328    | 508.3  | 484.1  | 401.3  | 464.2  | 442.5  | 0.315158212 | 395.8    | 448.025  | 52.225  | 0.883432844 | 0.2576   | 1.147  |
| 96043_at   | 136.1  | 129.5  | 171.9  | 108.5  | 124.6  | 124.3  | 108.9  | 71.7   | 0.159469219 | 136.5    | 107.375  | 29.125  | 1.271245634 | 0.1718   | -1.284 |
| 96044_at   | 90.5   | 64.3   | 97.5   | 129.9  | 75.5   | 58.9   | 104    | 86.7   | 0.423738746 | 95.55    | 81.275   | 14.275  | 1.175638265 | 0.4484   | -1.165 |
| 96045_at   | 350.2  | 330.3  | 485.8  | 402.2  | 372.9  | 336.9  | 363    | 388.7  | 0.507269149 | 392.125  | 365.375  | 26.75   | 1.073212453 | 0.5292   | -1.063 |
| 96046_at   | 1002.1 | 1008.5 | 1206.7 | 1007.9 | 1187.8 | 907.6  | 1028.7 | 1100.8 | 0.99926137  | 1056.3   | 1056.225 | 0.075   | 1.000071008 | 0.9817   | -1.002 |
| 96047_at   | 231.8  | 188.3  | 138.3  | 191.3  | 192    | 222.7  | 193.8  | 235.3  | 0.335591688 | 187.425  | 210.95   | 23.525  | 0.888480683 | 0.3101   | 1.14   |
| 96048_at   | 315.5  | 150.3  | 203.3  | 267.2  | 151.2  | 255.4  | 209.8  | 194.7  | 0.491074801 | 234.075  | 202.775  | 31.3    | 1.154358279 | 0.5535   | -1.13  |
| 96049_at   | 7686.6 | 8117   | 9039.9 | 6582.9 | 6235.9 | 9326.3 | 9876.5 | 7185.5 | 0.777663013 | 7856.6   | 8156.05  | 299.45  | 0.963284923 | 0.8421   | -1.027 |
| 96050_at   | 964.7  | 1879.8 | 1179.1 | 1405.2 | 2158.1 | 1239   | 1317.9 | 1161.3 | 0.725540888 | 1357.2   | 1469.075 | 111.875 | 0.923846638 | 0.7127   | -1.08  |
| 96051_at   | 22.4   | 30.6   | 23.3   | 55     | 32.5   | 61     | 7.9    | 50.3   | 0.727874871 | 32.825   | 37.925   | 5.1     | 0.865524061 | 0.9592   | -1.027 |
| 96052_at   | 1326.5 | 936.1  | 1085.1 | 1033.6 | 864.9  | 1005   | 940.3  | 954.4  | 0.159775856 | 1095.325 | 941.15   | 154.175 | 1.163815545 | 0.1188   | -1.156 |
| 96053_i_at | 611.2  | 324.6  | 399.1  | 430.3  | 256.4  | 312    | 284.1  | 357.4  | 0.102545828 | 441.3    | 302.475  | 138.825 | 1.458963551 | 0.05344  | -1.431 |
| 96054_f_at | 821.9  | 527.6  | 565.8  | 609    | 488.6  | 556.5  | 458.2  | 395.7  | 0.094346184 | 631.075  | 474.75   | 156.325 | 1.329278568 | 0.06113  | -1.319 |
| 96055_at   | 9.6    | 43.8   | 14.1   | 9.2    | 7.3    | 31.1   | 13.7   | 37.4   | 0.779345235 | 19.175   | 22.375   | 3.2     | 0.85698324  | 0.732    | 1.207  |
| 96056_at   | 2012   | 1850.3 | 2247.1 | 1632.4 | 2048.9 | 2053.5 | 1941.3 | 1588.4 | 0.877198038 | 1935.45  | 1908.025 | 27.425  | 1.014373501 | 0.8922   | -1.013 |
| 96057_at   | 846.7  | 1367.7 | 1078.5 | 1144   | 1219.5 | 1242.1 | 1424.3 | 980.9  | 0.474353866 | 1109.225 | 1216.7   | 107.475 | 0.911666804 | 0.4638   | -1.103 |
| 96058_s_at | 994.9  | 1647.6 | 1130.6 | 1405.1 | 1551.6 | 1389.4 | 1802.9 | 1316   | 0.272650002 | 1294.55  | 1514.975 | 220.425 | 0.85450255  | 0.2483   | 1.184  |
| 96059_at   | 781.6  | 710    | 734    | 644.2  | 700.1  | 616.3  | 723.4  | 1209.6 | 0.535619466 | 717.45   | 812.35   | 94.9    | 0.883178433 | 0.5764   | -1.095 |
| 96060_at   | 6067.6 | 5977.4 | 5429   | 6284.2 | 8166.9 | 6353.6 | 7530.6 | 6449.7 | 0.066654365 | 5939.55  | 7125.2   | 1185.65 | 0.833597653 | 0.04091  | 1.195  |
| 96061_at   | 1170   | 769.6  | 978.1  | 933.5  | 522.3  | 926.4  | 637    | 695.2  | 0.064518186 | 962.8    | 695.225  | 267.575 | 1.3848754   | 0.06204  | -1.4   |
| 96063_at   | 472.7  | 322.4  | 373    | 391.8  | 356.6  | 400.7  | 420.2  | 436.2  | 0.722551247 | 389.975  | 403.425  | 13.45   | 0.96666047  | 0.6693   | -1.041 |
| 96064_at   | 8.7    | 20.1   | 12.4   | 9.4    | 14.3   | 13.8   | 12.9   | 11.5   | 0.869610271 | 12.65    | 13.125   | 0.475   | 0.963809524 | 0.6566   | -1.096 |
| 96065_at   | 584.6  | 625.6  | 724.7  | 535.3  | 572.4  | 457.4  | 465.1  | 418.9  | 0.038065491 | 617.55   | 478.45   | 139.1   | 1.290730484 | 0.03194  | -1.291 |
| 96066_s_at | 6418.9 | 6120.1 | 7121.9 | 5845.2 | 5889.1 | 5412.7 | 5890.2 | 5544.2 | 0.080356319 | 6376.525 | 5684.05  | 692.475 | 1.121827746 | 0.05469  | -1.12  |
| 96068_at   | 1731.2 | 1387.9 | 1551   | 1594.3 | 1575.2 | 1246   | 1389.3 | 813.6  | 0.152717255 | 1566.1   | 1256.025 | 310.075 | 1.246870086 | 0.1527   | -1.279 |
| 96069_at   | 1514.8 | 1696   | 1595.4 | 1460.7 | 1759.8 | 1541.7 | 1802.8 | 1558   | 0.290526571 | 1566.725 | 1665.575 | 98.85   | 0.940651126 | 0.2895   | -1.062 |
| 96070_at   | 210    | 273.2  | 316.1  | 173    | 209.5  | 228.7  | 328.7  | 341.4  | 0.492363317 | 243.075  | 277.075  | 34      | 0.877289543 | 0.49     | 1.144  |
| 96071_at   | 505.3  | 462.8  | 469.9  | 552.5  | 661    | 463.7  | 477.7  | 410.8  | 0.927254344 | 497.625  | 503.3    | 5.675   | 0.988724419 | 0.9835   | -1.002 |
| 96072_at   | 4923.4 | 4661.8 | 4728.9 | 3791   | 5713   | 4610.7 | 5594.3 | 4135.6 | 0.334579968 | 4526.275 | 5013.4   | 487.125 | 0.902835401 | 0.3526   | -1.103 |
| 96073_at   | 1294.1 | 1186   | 1274.9 | 1508.4 | 1097   | 1320.4 | 1154.5 | 1566.2 | 0.812439058 | 1315.85  | 1284.525 | 31.325  | 1.024386446 | 0.762    | -1.03  |
| 96074_at   | 5.9    | 12.5   | 5.4    | 23.8   | 6.6    | 22.2   | 8      | 7.2    | 0.87959227  | 11.9     | 11       | 0.9     | 1.081818182 | 0.9511   | -1.029 |
| 96075_at   | 2177.1 | 1974.6 | 1949.3 | 2270.6 | 1364.6 | 1835.3 | 1389.8 | 1829.6 | 0.025073774 | 2092.9   | 1604.825 | 488.075 | 1.304129734 | 0.02335  | -1.315 |
| 96076_at   | 1382.4 | 1419.9 | 1575.1 | 1251.3 | 1499   | 1421.7 | 1379.7 | 1698.1 | 0.377878321 | 1407.175 | 1499.625 | 92.45   | 0.938351254 | 0.3704   | -1.066 |
| 96077_at   | 26.9   | 2.7    | 23     | 22.7   | 8.2    | 20.2   | 8.5    | 30.7   | 0.810115106 | 18.825   | 16.9     | 1.925   | 1.113905325 | 0.9598   | -1.034 |
| 96078_g_at | 9.3    | 13.8   | 38.5   | 13.7   | 54.1   | 26     | 33.2   | 8.8    | 0.352013107 | 18.825   | 30.525   | 11.7    | 0.616707617 | 0.3932   | 1.571  |
| 96079_at   | 1117.2 | 1032.6 | 963.2  | 1093.8 | 1073.9 | 976.3  | 1181.8 | 1436.5 | 0.337469465 | 1051.7   | 1167.125 | 115.425 | 0.901103138 | 0.3248   | -1.1   |
| 96081_at   | 2145.9 | 2251.3 | 2324.3 | 1659.7 | 2233.8 | 1711   | 1720.9 | 1491.4 | 0.20866114  | 2095.3   | 1789.275 | 306.025 | 1.17103296  | 0.2089   | -1.174 |
| 96082_at   | 1238.4 | 1134.6 | 1351   | 1269.9 | 2800.9 | 929.4  | 1579   | 884    | 0.551098405 | 1248.475 | 1548.325 | 299.85  | 0.806339108 | 0.7193   | 1.108  |
| 96083_s_at | 4390.8 | 4643.4 | 4186.4 | 4032.4 | 3913.2 | 5103.9 | 4387   | 4584   | 0.54261756  | 4313.25  | 4497.025 | 183.775 | 0.959134094 | 0.562    | -1.039 |
| 96084_at   | 1217.1 | 1211.9 | 1197.1 | 1162.5 | 1011.1 | 1393.3 | 1171.2 | 1331.1 | 0.754856644 | 1197.15  | 1226.675 | 29.525  | 0.97593087  | 0.8242   | -1.017 |
| 96085_at   | 2335.9 | 1724.6 | 1192.1 | 1820.7 | 1140   | 1246   | 1287   | 1194.9 | 0.098882817 | 1768.325 | 1216.975 | 551.35  | 1.45304957  | 0.04954  | -1.414 |
| 96086_at   | 1704.9 | 1421.8 | 1751.7 | 1478.9 | 1287.4 | 1627   | 1618.3 | 1680   | 0.775717278 | 1589.325 | 1553.175 | 36.15   | 1.023274905 | 0.7705   | -1.025 |
| 96087_at   | 691.7  | 910.9  | 751.2  | 949.7  | 805.2  | 917.8  | 859    | 946.9  | 0.458962126 | 825.875  | 882.225  | 56.35   | 0.936127405 | 0.4213   | -1.075 |
| 96088_at   | 740.7  | 602.5  | 602.9  | 492.1  | 777.2  | 1023.2 | 991.4  | 640.4  | 0.065684356 | 609.55   | 858.05   | 248.5   | 0.710389837 | 0.05191  | 1.397  |
| 96089_at   | 191.9  | 222    | 183.2  | 271.6  | 191.7  | 246.3  | 194.9  | 250    | 0.894032202 | 217.175  | 220.725  | 3.55    | 0.983916638 | 0.8635   | -1.021 |
| 96090_g_at | 482.2  | 495.7  | 475.7  | 464.6  | 396.1  | 538.9  | 436.6  | 465.7  | 0.554740726 | 479.55   | 459.325  | 20.225  | 1.044032003 | 0.4853   | -1.05  |



|            |        |        |        |        |        |        |        |        |             |          |          |         |             |          |        |
|------------|--------|--------|--------|--------|--------|--------|--------|--------|-------------|----------|----------|---------|-------------|----------|--------|
| 96091_at   | 133.2  | 133.3  | 150.7  | 14.2   | 51.5   | 133.3  | 131.8  | 22.4   | 0.604829021 | 107.85   | 84.75    | 23.1    | 1.272566372 | 0.8331   | -1.17  |
| 96092_at   | 239.6  | 176.1  | 169.5  | 168.6  | 200.7  | 170.7  | 179.3  | 259.5  | 0.612087068 | 188.45   | 202.55   | 14.1    | 0.930387559 | 0.5981   | -1.073 |
| 96093_at   | 640.8  | 485.3  | 545.4  | 657.7  | 594.5  | 644.4  | 585.2  | 534.5  | 0.881029705 | 582.3    | 589.65   | 7.35    | 0.987534978 | 0.8332   | -1.018 |
| 96094_at   | 15.9   | 20     | 28.2   | 18.3   | 39.7   | 15.8   | 31.5   | 14.6   | 0.511439776 | 20.6     | 25.4     | 4.8     | 0.811023622 | 0.6285   | 1.152  |
| 96095_i_at | 169.2  | 164.1  | 189.7  | 204    | 130    | 183.3  | 166.6  | 147.2  | 0.145354939 | 181.75   | 156.775  | 24.975  | 1.159304736 | 0.1426   | -1.164 |
| 96096_f_at | 387    | 359    | 389.5  | 378.2  | 466    | 446.4  | 482.9  | 419    | 0.006227112 | 378.425  | 453.575  | 75.15   | 0.834316265 | 0.002324 | 1.198  |
| 96097_at   | 486.9  | 437.5  | 501.9  | 433.5  | 491.5  | 382.7  | 433    | 378.9  | 0.225215327 | 464.95   | 421.525  | 43.425  | 1.103018801 | 0.205    | -1.107 |
| 96098_at   | 670    | 576.1  | 657.7  | 691.3  | 750.3  | 569.9  | 607.4  | 570.3  | 0.646265916 | 648.775  | 624.475  | 24.3    | 1.038912687 | 0.599    | -1.043 |
| 96099_at   | 360.8  | 400.5  | 383.2  | 338.8  | 404.7  | 241.7  | 450.9  | 546.9  | 0.577322521 | 370.825  | 411.05   | 40.225  | 0.902140859 | 0.7367   | -1.065 |
| 96101_at   | 8.9    | 7.9    | 10.7   | 14.7   | 4.7    | 5.2    | 10.2   | 16.7   | 0.689276794 | 10.55    | 9.2      | 1.35    | 1.14673913  | 0.4861   | -1.276 |
| 96102_i_at | 692.4  | 916.1  | 811    | 777.8  | 615.3  | 899.1  | 817.7  | 715    | 0.64474361  | 799.325  | 761.775  | 37.55   | 1.04929277  | 0.6168   | -1.055 |
| 96103_f_at | 645.2  | 697.6  | 735.1  | 566.1  | 584    | 847.6  | 658.2  | 525.8  | 0.932239565 | 661      | 653.9    | 7.1     | 1.010857929 | 0.8553   | -1.023 |
| 96104_at   | 985.8  | 1295.7 | 996    | 1256   | 897.8  | 1474.4 | 1159.7 | 1090.8 | 0.883894751 | 1133.375 | 1155.675 | 22.3    | 0.980703918 | 0.9291   | -1.012 |
| 96106_at   | 752.8  | 657.9  | 719.2  | 646.3  | 798.6  | 631.3  | 622.5  | 524    | 0.466295044 | 694.05   | 644.1    | 49.95   | 1.07755007  | 0.4047   | -1.088 |
| 96109_at   | 11.6   | 12.7   | 15.2   | 13.8   | 28.7   | 11.6   | 13.5   | 20.2   | 0.27475434  | 13.325   | 18.5     | 5.175   | 0.72027027  | 0.2547   | 1.307  |
| 96110_at   | 462.3  | 570.9  | 576.9  | 540.1  | 798.8  | 609.2  | 775.2  | 507.3  | 0.145782859 | 537.55   | 672.625  | 135.075 | 0.799182308 | 0.1256   | 1.235  |
| 96112_at   | 1609.8 | 1476.9 | 1404.8 | 1654.2 | 1365.8 | 1600.5 | 1530.1 | 1594.5 | 0.869000442 | 1536.425 | 1522.725 | 13.7    | 1.008997028 | 0.8731   | -1.009 |
| 96113_at   | 2362.7 | 2599.8 | 2377.3 | 2083   | 2418.7 | 2582.8 | 2273.1 | 1832.6 | 0.698569981 | 2355.7   | 2276.8   | 78.9    | 1.0346539   | 0.6704   | -1.04  |
| 96114_at   | 18.3   | 39.5   | 69.5   | 62.1   | 69     | 29.1   | 76     | 36.1   | 0.762890831 | 47.35    | 52.55    | 5.2     | 0.901046622 | 0.7247   | 1.153  |
| 96115_at   | 3920.5 | 3381.6 | 4085.5 | 3341.9 | 4932.6 | 3996.3 | 3788.7 | 3825.1 | 0.222655943 | 3682.375 | 4135.675 | 453.3   | 0.890392741 | 0.2047   | -1.121 |
| 96116_at   | 2      | 4.4    | 3.2    | 5.8    | 4.4    | 4.7    | 2.6    | 5.8    | 0.635669427 | 3.85     | 4.375    | 0.525   | 0.88        | 0.5873   | 1.175  |
| 96117_r_at | 1620.8 | 1409.7 | 1444.9 | 1242.7 | 1874.4 | 1492.6 | 1582.6 | 1774.7 | 0.075201742 | 1429.525 | 1681.075 | 251.55  | 0.850363607 | 0.07439  | 1.176  |
| 96118_at   | 154.3  | 152.1  | 106.3  | 118.9  | 39.7   | 123.7  | 101.7  | 161.1  | 0.398678996 | 132.9    | 106.55   | 26.35   | 1.247301736 | 0.3456   | -1.385 |
| 96119_s_at | 627.2  | 578.2  | 662.1  | 569    | 804.5  | 727.6  | 499.1  | 737.9  | 0.307157726 | 609.125  | 692.275  | 83.15   | 0.879888773 | 0.3477   | 1.121  |
| 96120_at   | 3855.6 | 2866.6 | 3375.2 | 3083   | 2530.1 | 3613.5 | 3023.4 | 3341.3 | 0.614224981 | 3295.1   | 3127.075 | 168.025 | 1.053732322 | 0.6031   | -1.056 |
| 96121_at   | 514    | 609.9  | 562    | 571.3  | 540.2  | 576.6  | 676    | 513.3  | 0.776762453 | 564.3    | 576.525  | 12.225  | 0.978795369 | 0.8063   | -1.018 |
| 96122_at   | 382.7  | 337.7  | 331    | 342.9  | 571.6  | 516.1  | 553.8  | 654.2  | 0.002127916 | 348.575  | 573.925  | 225.35  | 0.607352877 | 0.000159 | 1.643  |
| 96123_at   | 261.1  | 301.4  | 291.7  | 272.3  | 320    | 297.2  | 235.5  | 376    | 0.453926181 | 281.625  | 307.175  | 25.55   | 0.916822658 | 0.4955   | -1.077 |
| 96124_at   | 454.5  | 745.9  | 583.1  | 591.7  | 470.3  | 569.1  | 503.3  | 541    | 0.318051779 | 593.8    | 520.925  | 72.875  | 1.139895378 | 0.321    | -1.126 |
| 96125_at   | 412.9  | 451.7  | 416.5  | 539    | 352.8  | 410.4  | 435.1  | 352.3  | 0.115688413 | 455.025  | 387.65   | 67.375  | 1.173803689 | 0.1005   | -1.172 |
| 96126_at   | 694.5  | 609.7  | 961    | 740.3  | 353.9  | 878.7  | 501.2  | 586.6  | 0.2530671   | 751.375  | 580.1    | 171.275 | 1.295250819 | 0.2082   | -1.347 |
| 96127_at   | 977.7  | 935.2  | 958    | 1036.5 | 712.3  | 1034   | 889.4  | 873.3  | 0.23049547  | 976.85   | 877.25   | 99.6    | 1.11353662  | 0.1973   | -1.122 |
| 96128_at   | 146.9  | 149.6  | 158.7  | 175.7  | 235.2  | 166.9  | 238.5  | 253.3  | 0.03599702  | 157.725  | 223.475  | 65.75   | 0.705783645 | 0.01658  | 1.402  |
| 96130_at   | 890.6  | 920.7  | 903.7  | 1057.4 | 747.2  | 990.7  | 1028.7 | 918.6  | 0.778221121 | 943.1    | 921.3    | 21.8    | 1.023662216 | 0.7401   | -1.029 |
| 96131_at   | 290.7  | 365.2  | 299.7  | 327.1  | 314.5  | 297.6  | 324.9  | 271.8  | 0.40327257  | 320.675  | 302.2    | 18.475  | 1.06113501  | 0.4049   | -1.059 |
| 96132_at   | 144.8  | 275.7  | 230.2  | 216.7  | 261.6  | 213.8  | 256.3  | 239.3  | 0.425936227 | 216.85   | 242.75   | 25.9    | 0.89330587  | 0.3792   | 1.146  |
| 96134_at   | 211.2  | 221.1  | 150.7  | 205.5  | 278.2  | 247    | 327.9  | 321.1  | 0.008528233 | 197.125  | 293.55   | 96.425  | 0.671521036 | 0.01045  | 1.495  |
| 96135_at   | 2516.3 | 2017.2 | 2227.8 | 2540.1 | 1996.4 | 2098.3 | 2044   | 2172.7 | 0.139733779 | 2325.35  | 2077.85  | 247.5   | 1.119113507 | 0.1088   | -1.115 |
| 96136_at   | 354    | 154.1  | 286.9  | 152.1  | 216.5  | 200.2  | 217.5  | 218.7  | 0.671747545 | 236.775  | 213.225  | 23.55   | 1.110446711 | 0.8743   | -1.036 |
| 96138_at   | 621.5  | 785.6  | 570.7  | 765.5  | 903.7  | 617.2  | 872.4  | 698.1  | 0.357489726 | 685.825  | 772.85   | 87.025  | 0.887397296 | 0.3703   | 1.123  |
| 96139_at   | 580.3  | 698    | 828.9  | 877.8  | 664.7  | 837.7  | 697.3  | 863.2  | 0.823878355 | 746.25   | 765.725  | 19.475  | 0.974566587 | 0.7874   | -1.033 |
| 96140_at   | 414.3  | 456.6  | 368.1  | 407.5  | 354.5  | 453.3  | 313.4  | 428.6  | 0.545365345 | 411.625  | 387.45   | 24.175  | 1.062395148 | 0.5032   | -1.071 |
| 96143_at   | 47.2   | 31.2   | 42.2   | 38.2   | 49.4   | 30.1   | 12.2   | 39.6   | 0.468929985 | 39.7     | 32.825   | 6.875   | 1.209444021 | 0.3849   | -1.349 |
| 96144_at   | 186.1  | 224.3  | 215.8  | 180.8  | 143.5  | 191.1  | 183.5  | 192.7  | 0.179171315 | 201.75   | 177.7    | 24.05   | 1.135340461 | 0.1911   | -1.138 |
| 96145_at   | 394.1  | 338.2  | 518.4  | 331    | 539    | 446.9  | 516    | 419.5  | 0.15969375  | 395.425  | 480.35   | 84.925  | 0.823201832 | 0.1343   | 1.229  |
| 96146_at   | 882.1  | 1030.4 | 1135.8 | 918.8  | 791.1  | 1203.8 | 910.7  | 766.9  | 0.553202966 | 991.775  | 918.125  | 73.65   | 1.080217835 | 0.4795   | -1.093 |
| 96147_at   | 137.6  | 191.7  | 191.5  | 179.2  | 144.6  | 206.8  | 217.1  | 153.1  | 0.818720304 | 175      | 180.4    | 5.4     | 0.970066519 | 0.863    | -1.024 |
| 96148_at   | 503.6  | 475.8  | 421    | 412.8  | 254.3  | 523.2  | 374.3  | 408.1  | 0.348265173 | 453.3    | 389.975  | 63.325  | 1.162382204 | 0.2972   | -1.196 |
| 96151_at   | 42.1   | 39.7   | 41.2   | 73.9   | 55.3   | 47.5   | 66.3   | 53.4   | 0.519332824 | 49.225   | 55.625   | 6.4     | 0.88494382  | 0.391    | 1.163  |
| 96152_at   | 1047   | 849.7  | 819.3  | 868.5  | 705    | 764.3  | 904.1  | 1032.2 | 0.636982861 | 896.125  | 851.4    | 44.725  | 1.052531125 | 0.5908   | -1.059 |
| 96153_at   | 38.2   | 27.6   | 26.3   | 30.2   | 37.5   | 34.2   | 26.8   | 49.1   | 0.292753395 | 30.575   | 36.9     | 6.325   | 0.828590786 | 0.2854   | 1.192  |
| 96154_at   | 760    | 569    | 705.9  | 741    | 562.2  | 612.1  | 562.8  | 691    | 0.155931069 | 693.975  | 607.025  | 86.95   | 1.14323957  | 0.1602   | -1.14  |
| 96155_at   | 592.3  | 881    | 732.9  | 691.2  | 1017.7 | 786    | 1013.3 | 913.2  | 0.042695804 | 724.35   | 932.55   | 208.2   | 0.776741194 | 0.04511  | 1.293  |
| 96156_at   | 3733.8 | 2314.3 | 1389.9 | 2355.8 | 3316.4 | 1481   | 1623   | 2521.6 | 0.752702207 | 2448.45  | 2235.5   | 212.95  | 1.095258331 | 0.7679   | -1.089 |
| 96157_at   | 1516.9 | 1549.4 | 1451.7 | 1418.3 | 1283.8 | 1444   | 1575.6 | 1210.4 | 0.29554926  | 1484.075 | 1378.45  | 105.625 | 1.07662592  | 0.2552   | -1.082 |
| 96158_at   | 1214.4 | 1202.4 | 1300.4 | 1219.5 | 1151.5 | 1276.8 | 1332.1 | 1053.7 | 0.670272683 | 1234.175 | 1203.525 | 30.65   | 1.025466858 | 0.6232   | -1.029 |



|            |        |        |        |        |        |        |        |        |             |          |          |          |             |          |        |
|------------|--------|--------|--------|--------|--------|--------|--------|--------|-------------|----------|----------|----------|-------------|----------|--------|
| 96160_at   | 608.9  | 688.8  | 669.5  | 690.6  | 888    | 757.1  | 766.4  | 803.6  | 0.01056791  | 664.45   | 803.775  | 139.325  | 0.82666169  | 0.006659 | 1.209  |
| 96162_at   | 62     | 63.4   | 66.3   | 63.9   | 59.5   | 81.8   | 75.2   | 144.7  | 0.253437191 | 63.9     | 90.3     | 26.4     | 0.707641196 | 0.177    | 1.336  |
| 96165_at   | 746.9  | 647.7  | 723.5  | 846.1  | 513.8  | 743.6  | 704.1  | 755.2  | 0.410781766 | 741.05   | 679.175  | 61.875   | 1.091103177 | 0.4076   | -1.099 |
| 96166_at   | 1237.3 | 1197   | 1238   | 1557.8 | 1012.4 | 1313.1 | 1239.4 | 1453.9 | 0.686776338 | 1307.525 | 1254.7   | 52.825   | 1.042101698 | 0.6677   | -1.045 |
| 96167_at   | 197.5  | 307.5  | 228.8  | 157.1  | 216.1  | 300.5  | 299.2  | 211.5  | 0.432781442 | 222.725  | 256.825  | 34.1     | 0.867224764 | 0.3914   | 1.171  |
| 96168_at   | 2136.6 | 1978.4 | 1836.8 | 1565.4 | 1483   | 1608.2 | 1623.4 | 1110.7 | 0.047456906 | 1879.3   | 1456.325 | 422.975  | 1.290439977 | 0.05772  | -1.297 |
| 96169_at   | 114.6  | 184.4  | 108.8  | 180.5  | 93.8   | 190.4  | 119.9  | 158.5  | 0.834863172 | 147.075  | 140.65   | 6.425    | 1.045680768 | 0.819    | -1.052 |
| 96171_at   | 457    | 520.1  | 419.5  | 390.5  | 499.2  | 516.5  | 498.1  | 434.9  | 0.27721576  | 446.775  | 487.175  | 40.4     | 0.91707292  | 0.2595   | -1.094 |
| 96172_at   | 336.4  | 248.4  | 281.1  | 283.6  | 222.8  | 291.2  | 312.3  | 308.3  | 0.897258449 | 287.375  | 283.65   | 3.725    | 1.013132381 | 0.878    | -1.016 |
| 96174_at   | 339.7  | 767.5  | 465.8  | 478.5  | 259.5  | 395.7  | 384.7  | 419.1  | 0.204050254 | 512.875  | 364.75   | 148.125  | 1.406100069 | 0.1684   | -1.369 |
| 96176_at   | 609.8  | 630.2  | 692.4  | 501.3  | 559.6  | 710.6  | 711.9  | 534.7  | 0.749618676 | 608.425  | 629.2    | 20.775   | 0.966981882 | 0.768    | -1.032 |
| 96177_at   | 517.4  | 451.9  | 480    | 498.3  | 542.8  | 522.5  | 480.5  | 541.3  | 0.133895214 | 486.9    | 521.775  | 34.875   | 0.933160845 | 0.138    | -1.072 |
| 96178_at   | 1476.7 | 1289.9 | 1440.7 | 1616.6 | 650.8  | 1449.1 | 1152.9 | 1586.7 | 0.327658337 | 1455.975 | 1209.875 | 246.1    | 1.203409443 | 0.2944   | -1.266 |
| 96180_at   | 127.8  | 109.8  | 93.4   | 131.7  | 44.4   | 111.8  | 54.2   | 130.9  | 0.257624725 | 115.675  | 85.325   | 30.35    | 1.355698799 | 0.2018   | -1.487 |
| 96183_at   | 149.2  | 165.7  | 114    | 173.1  | 139.8  | 188.3  | 153.9  | 268    | 0.303282535 | 150.5    | 187.5    | 37       | 0.802666667 | 0.2881   | 1.222  |
| 96184_at   | 190.4  | 532.3  | 285.6  | 212.8  | 354.7  | 322.8  | 381.8  | 260.8  | 0.78063041  | 305.275  | 330.025  | 24.75    | 0.925005681 | 0.5528   | 1.166  |
| 96185_at   | 1602.5 | 1628.9 | 1177.6 | 1335.4 | 1282.7 | 1442.1 | 1390.2 | 1310.3 | 0.528238045 | 1436.1   | 1356.325 | 79.775   | 1.058817024 | 0.5697   | -1.051 |
| 96186_at   | 370.9  | 851.2  | 609.7  | 571.2  | 427.8  | 694.2  | 602.5  | 603.8  | 0.87576692  | 600.75   | 582.075  | 18.675   | 1.032083494 | 0.9831   | -1.004 |
| 96187_at   | 775.2  | 1076.9 | 811.3  | 1006.7 | 1041.5 | 1136   | 1191.9 | 1246.4 | 0.040679683 | 917.525  | 1153.95  | 236.425  | 0.795116773 | 0.03762  | 1.267  |
| 96188_at   | 167.8  | 200.5  | 190.6  | 196.4  | 165.5  | 210.5  | 164.5  | 221.1  | 0.928271046 | 188.825  | 190.4    | 1.575    | 0.991727941 | 0.9869   | -1.001 |
| 96189_at   | 100.5  | 102.8  | 100.9  | 124.7  | 70.4   | 127.9  | 124.6  | 154.1  | 0.554596779 | 107.225  | 119.25   | 12.025   | 0.899161426 | 0.7005   | -1.074 |
| 96191_at   | 1066.7 | 973.7  | 1255.8 | 994.8  | 1518.8 | 1113.1 | 1296.2 | 1103.8 | 0.171513331 | 1072.75  | 1257.975 | 185.225  | 0.852759395 | 0.1517   | 1.168  |
| 96192_at   | 1654.1 | 1755.4 | 1533.9 | 1637.8 | 2120.1 | 1659.5 | 1747.6 | 1962.4 | 0.114717906 | 1645.3   | 1872.4   | 227.1    | 0.878711814 | 0.08847  | 1.134  |
| 96193_at   | 180.7  | 254.1  | 147.1  | 232    | 161.6  | 177.2  | 145    | 233.5  | 0.466569448 | 203.475  | 179.325  | 24.15    | 1.134671685 | 0.483    | -1.127 |
| 96195_at   | 640.2  | 1120.3 | 844.7  | 918.4  | 931.8  | 902.4  | 894.1  | 933.6  | 0.75112453  | 880.9    | 915.475  | 34.575   | 0.962232721 | 0.6361   | -1.06  |
| 96196_i_at | 756.7  | 638.9  | 559.9  | 676.1  | 539.1  | 659.5  | 528.8  | 541.8  | 0.13105361  | 657.9    | 567.3    | 90.6     | 1.15970386  | 0.1218   | -1.158 |
| 96197_f_at | 597.6  | 586.2  | 540.4  | 639    | 588.6  | 664.8  | 548.7  | 541.9  | 0.89507485  | 590.8    | 586      | 4.8      | 1.008191126 | 0.8729   | -1.01  |
| 96198_at   | 141.9  | 217.7  | 155.6  | 101.1  | 217.6  | 134.6  | 177.6  | 221.1  | 0.328213376 | 154.075  | 187.725  | 33.65    | 0.820748435 | 0.3129   | 1.24   |
| 96199_at   | 242.2  | 186.8  | 225.5  | 283    | 159.4  | 214.2  | 190.8  | 166.6  | 0.079085296 | 234.375  | 182.75   | 51.625   | 1.28248974  | 0.06629  | -1.277 |
| 96200_at   | 1459.6 | 1097.9 | 1172.9 | 1090.5 | 1065.6 | 975.3  | 909.6  | 1058.7 | 0.097013204 | 1205.225 | 1002.3   | 202.925  | 1.202459344 | 0.06096  | -1.196 |
| 96201_at   | 116.2  | 184    | 146.8  | 145.6  | 154.4  | 165.8  | 176.5  | 166.5  | 0.299652562 | 148.15   | 165.8    | 17.65    | 0.893546441 | 0.2499   | 1.132  |
| 96202_at   | 129.8  | 115.6  | 58.9   | 101.7  | 137.9  | 49.7   | 25.6   | 147.5  | 0.756965056 | 101.5    | 90.175   | 11.325   | 1.125589132 | 0.5212   | -1.365 |
| 96203_at   | 393.8  | 302    | 223.6  | 261    | 370    | 282.9  | 349    | 409.4  | 0.25270147  | 295.1    | 352.825  | 57.725   | 0.836391979 | 0.2296   | 1.211  |
| 96204_at   | 177.2  | 148.8  | 175.8  | 164.6  | 109.5  | 154.6  | 114.4  | 116.4  | 0.017147796 | 166.6    | 123.725  | 42.875   | 1.346534653 | 0.01372  | -1.356 |
| 96205_at   | 353.1  | 319.7  | 367.1  | 389.1  | 371    | 268.9  | 352.2  | 289.5  | 0.253146346 | 357.25   | 320.4    | 36.85    | 1.115012484 | 0.2353   | -1.122 |
| 96206_at   | 283.6  | 357.3  | 305.7  | 304.8  | 342.8  | 313.7  | 388.5  | 306.7  | 0.343141626 | 312.85   | 337.925  | 25.075   | 0.925797144 | 0.3329   | -1.079 |
| 96207_at   | 706.4  | 905.2  | 791.4  | 891.3  | 830.1  | 1020.8 | 808.9  | 827.6  | 0.505896781 | 823.575  | 871.85   | 48.275   | 0.944629237 | 0.4981   | -1.059 |
| 96208_at   | 353.3  | 521.2  | 376.1  | 439.4  | 431.9  | 395.4  | 425.8  | 350.5  | 0.631523169 | 422.5    | 400.9    | 21.6     | 1.053878773 | 0.6707   | -1.045 |
| 96211_at   | 189.2  | 246.5  | 239    | 178.3  | 228.4  | 202.1  | 184.6  | 230.4  | 0.930474524 | 213.25   | 211.375  | 1.875    | 1.008870491 | 0.9744   | -1.003 |
| 96212_at   | 587.1  | 683.3  | 588    | 715.3  | 554.7  | 749.9  | 579.4  | 965.5  | 0.532825028 | 643.425  | 712.375  | 68.95    | 0.90321109  | 0.5823   | -1.084 |
| 96214_at   | 170.2  | 172.8  | 171.4  | 206.2  | 193.4  | 153.9  | 175.4  | 264    | 0.552492239 | 180.15   | 196.675  | 16.525   | 0.915978137 | 0.59     | -1.073 |
| 96215_f_at | 355.4  | 1116.3 | 1395.3 | 1602.7 | 1416.9 | 1662.2 | 1766.6 | 1704.4 | 0.151227008 | 1117.425 | 1637.525 | 520.1    | 0.682386528 | 0.1844   | 1.681  |
| 96216_at   | 313.5  | 248.7  | 256.1  | 275.7  | 203.5  | 259.4  | 194.8  | 248.9  | 0.074489567 | 273.5    | 226.65   | 46.85    | 1.206706375 | 0.07283  | -1.211 |
| 96217_at   | 212.4  | 222    | 194.2  | 246.7  | 149.5  | 183.4  | 241.3  | 234.1  | 0.525808193 | 218.825  | 202.075  | 16.75    | 1.082890016 | 0.4718   | -1.099 |
| 96218_at   | 199.8  | 203.5  | 190.3  | 191.8  | 114.7  | 242    | 167.6  | 121.7  | 0.320225382 | 196.35   | 161.5    | 34.85    | 1.215789474 | 0.2118   | -1.272 |
| 96219_at   | 238    | 278.5  | 263    | 355.4  | 260.3  | 329.3  | 312    | 279.5  | 0.713527747 | 283.725  | 295.275  | 11.55    | 0.960883922 | 0.6573   | -1.048 |
| 96220_at   | 244.6  | 164.5  | 195.8  | 292.5  | 200.4  | 222.1  | 231.1  | 231.6  | 0.922133431 | 224.35   | 221.3    | 3.05     | 1.013782196 | 0.9504   | -1.008 |
| 96221_at   | 623.1  | 659.6  | 592.3  | 562.1  | 795.6  | 634.5  | 660    | 774.6  | 0.07111637  | 609.275  | 716.175  | 106.9    | 0.850734806 | 0.05352  | 1.172  |
| 96222_at   | 336.3  | 280    | 294.4  | 385.8  | 213.3  | 334.2  | 332.7  | 301.9  | 0.470194141 | 324.125  | 295.525  | 28.6     | 1.096776922 | 0.4636   | -1.105 |
| 96223_at   | 327.1  | 323.6  | 230.6  | 284.9  | 308.3  | 314.2  | 346.4  | 352.5  | 0.190309664 | 291.55   | 330.35   | 38.8     | 0.882548812 | 0.182    | 1.142  |
| 96224_at   | 304.2  | 279.5  | 347.5  | 318    | 242.5  | 276.1  | 265.8  | 340.5  | 0.271626123 | 312.3    | 281.225  | 31.075   | 1.110498711 | 0.2436   | -1.116 |
| 96226_at   | 727.4  | 797.5  | 820    | 743.9  | 671.3  | 624.7  | 583.9  | 560.6  | 0.002642566 | 772.2    | 610.125  | 162.075  | 1.265642286 | 0.002793 | -1.267 |
| 96227_at   | 70.4   | 44.5   | 51.1   | 100.3  | 72     | 23.1   | 106.9  | 65.8   | 0.986551945 | 66.575   | 66.95    | 0.375    | 0.994398805 | 0.84     | -1.082 |
| 96228_at   | 2924.2 | 2611.7 | 2705.9 | 2505.5 | 4693.1 | 3108.9 | 3604.4 | 3702.4 | 0.041797789 | 2686.825 | 3777.2   | 1090.375 | 0.711327174 | 0.011    | 1.393  |
| 96229_at   | 28     | 26.8   | 30.8   | 18.7   | 13.4   | 9.8    | 38.2   | 40     | 0.935716072 | 26.075   | 25.35    | 0.725    | 1.028599606 | 0.6256   | -1.214 |
| 96230_at   | 16     | 89.4   | 67.3   | 55.7   | 64.5   | 81.9   | 14.1   | 18.1   | 0.605457179 | 57.1     | 44.65    | 12.45    | 1.278835386 | 0.5755   | -1.413 |



|            |         |         |         |         |         |         |         |         |             |          |          |         |             |         |        |
|------------|---------|---------|---------|---------|---------|---------|---------|---------|-------------|----------|----------|---------|-------------|---------|--------|
| 96231_at   | 463.3   | 461.2   | 419.2   | 425.5   | 485.6   | 449.5   | 352     | 392.5   | 0.52153223  | 442.3    | 419.9    | 22.4    | 1.053346035 | 0.4708  | -1.06  |
| 96232_at   | 868.7   | 825.9   | 750.1   | 753.2   | 687.7   | 733.8   | 766     | 840.4   | 0.364108585 | 799.475  | 756.975  | 42.5    | 1.056144523 | 0.3562  | -1.057 |
| 96234_at   | 1211.9  | 922.2   | 975.2   | 807.4   | 790.6   | 988.2   | 1029.1  | 983     | 0.766781319 | 979.175  | 947.725  | 31.45   | 1.033184732 | 0.8035  | -1.027 |
| 96236_at   | 859.8   | 1307.3  | 1218.4  | 997.3   | 1515.3  | 1308.3  | 1386.4  | 1106.7  | 0.131775074 | 1095.7   | 1329.175 | 233.475 | 0.824345929 | 0.1356  | 1.222  |
| 96237_at   | 39.3    | 13.2    | 12.3    | 23      | 33      | 54.8    | 32.2    | 50.7    | 0.052658434 | 21.95    | 42.675   | 20.725  | 0.514352665 | 0.04913 | 2.118  |
| 96238_at   | 505.9   | 519.3   | 503.2   | 636.7   | 239.4   | 523.2   | 363.3   | 360.1   | 0.054350801 | 541.275  | 371.5    | 169.775 | 1.456998654 | 0.05211 | -1.506 |
| 96239_at   | 778.1   | 760.2   | 718.3   | 696.4   | 745.5   | 716.9   | 719.1   | 632.6   | 0.306367366 | 738.25   | 703.525  | 34.725  | 1.049358587 | 0.3068  | -1.05  |
| 96240_at   | 686.6   | 915.9   | 604.1   | 773.5   | 592.5   | 673.1   | 557.5   | 893.2   | 0.536764508 | 745.025  | 679.075  | 65.95   | 1.097117402 | 0.502   | -1.103 |
| 96241_at   | 26.2    | 93.3    | 17.4    | 29.7    | 34.4    | 33.1    | 82.8    | 31.8    | 0.862848889 | 41.65    | 45.525   | 3.875   | 0.914881933 | 0.6325  | 1.24   |
| 96242_at   | 51.9    | 75.2    | 91.6    | 53.1    | 84.1    | 81.5    | 76      | 113.2   | 0.153302919 | 67.95    | 88.7     | 20.75   | 0.766065389 | 0.1351  | 1.327  |
| 96243_f_at | 523.5   | 544.2   | 457.4   | 517     | 426.3   | 493.5   | 476.3   | 514.4   | 0.260244822 | 510.525  | 477.625  | 32.9    | 1.068882491 | 0.2702  | -1.069 |
| 96244_at   | 956.7   | 1044.4  | 959.1   | 1143.2  | 1088.5  | 1294.3  | 1033.8  | 1160.8  | 0.151649651 | 1025.85  | 1144.35  | 118.5   | 0.896447765 | 0.1425  | -1.115 |
| 96245_at   | 641.7   | 716.2   | 723.5   | 685.6   | 711.2   | 682.8   | 699.3   | 776.4   | 0.389715651 | 691.75   | 717.425  | 25.675  | 0.964212287 | 0.3898  | -1.037 |
| 96249_at   | 3511.3  | 3586.7  | 3939.3  | 2696.8  | 4144.9  | 3607    | 3363.5  | 2642.5  | 0.98884266  | 3433.525 | 3439.475 | 5.95    | 0.998270085 | 0.9894  | -1.002 |
| 96252_at   | 562.3   | 833.5   | 685.3   | 804.9   | 641     | 825.5   | 770.8   | 759.1   | 0.721391331 | 721.5    | 749.1    | 27.6    | 0.963155787 | 0.6826  | -1.046 |
| 96254_at   | 787.7   | 822.9   | 1006.9  | 820.8   | 674.5   | 848.2   | 760.8   | 693.9   | 0.12160449  | 859.575  | 744.35   | 115.225 | 1.154799489 | 0.1071  | -1.154 |
| 96255_at   | 1865.1  | 1392.1  | 1437    | 1566.7  | 919.3   | 1449    | 1154.3  | 1409.5  | 0.088637648 | 1565.225 | 1233.025 | 332.2   | 1.269418706 | 0.09277 | -1.282 |
| 96256_at   | 2492.9  | 2207.2  | 2761.2  | 3438    | 3239.2  | 2573    | 3068.2  | 2804.4  | 0.545081112 | 2724.825 | 2921.2   | 196.375 | 0.932775914 | 0.4858  | -1.082 |
| 96257_at   | 1734.4  | 1559    | 1876.6  | 1803.7  | 1209.7  | 1609.4  | 1440.4  | 1727.9  | 0.12014837  | 1743.425 | 1496.85  | 246.575 | 1.164729265 | 0.1185  | -1.172 |
| 96258_at   | 1552.4  | 1742.6  | 1553.8  | 1420.4  | 3585.8  | 1487.1  | 1837.3  | 1567.2  | 0.346755952 | 1567.3   | 2119.35  | 552.05  | 0.739519192 | 0.2982  | 1.266  |
| 96259_at   | 556.6   | 712.1   | 623.3   | 709.5   | 656.9   | 602.6   | 709     | 747     | 0.581776912 | 650.375  | 678.875  | 28.5    | 0.958018781 | 0.5739  | -1.046 |
| 96260_at   | 936.5   | 929.1   | 842.3   | 748.6   | 861.9   | 929.1   | 907.1   | 882.7   | 0.543014295 | 864.125  | 895.2    | 31.075  | 0.965287087 | 0.5046  | -1.04  |
| 96261_at   | 3996.6  | 3159.9  | 3586.5  | 3357    | 3872    | 2699.5  | 3435.9  | 3064    | 0.440286058 | 3525     | 3267.85  | 257.15  | 1.078690882 | 0.414   | -1.084 |
| 96262_at   | 803.7   | 1074.5  | 840.4   | 989.8   | 878.4   | 980.2   | 787.3   | 1070.6  | 0.982462164 | 927.1    | 929.125  | 2.025   | 0.99782053  | 0.9798  | -1.003 |
| 96263_at   | 783.8   | 833.4   | 978.7   | 699.6   | 633.9   | 765.6   | 873.9   | 671.3   | 0.311873984 | 823.875  | 736.175  | 87.7    | 1.119129283 | 0.3026  | -1.12  |
| 96264_at   | 1099.9  | 818.7   | 1004    | 762.7   | 776.8   | 1097.1  | 907.3   | 815.6   | 0.842083417 | 921.325  | 899.2    | 22.125  | 1.024605205 | 0.852   | -1.023 |
| 96266_at   | 2993.8  | 2208.7  | 2757.8  | 2656.3  | 2474.2  | 2462.4  | 2402.4  | 2745.7  | 0.50192821  | 2654.15  | 2521.175 | 132.975 | 1.052743265 | 0.5336  | -1.048 |
| 96267_at   | 5345.8  | 4911.5  | 5824.5  | 5116.9  | 4749.6  | 4963.1  | 5238.3  | 5031.2  | 0.232674966 | 5299.675 | 4995.55  | 304.125 | 1.060879182 | 0.2158  | -1.059 |
| 96268_at   | 2286.2  | 1752.2  | 2221.1  | 1678    | 1970.3  | 2048.9  | 2055.1  | 1734.6  | 0.8616395   | 1984.375 | 1952.225 | 32.15   | 1.016468389 | 0.9209  | -1.009 |
| 96269_at   | 1094    | 856.6   | 1122.8  | 1000.1  | 891     | 1036.3  | 1158.4  | 973.7   | 0.967220692 | 1018.375 | 1014.85  | 3.525   | 1.00347342  | 0.9758  | -1.003 |
| 96270_at   | 1252.9  | 1557.9  | 1369.7  | 1316.5  | 1552.7  | 1334.8  | 1537.1  | 1788.9  | 0.171870182 | 1374.25  | 1553.375 | 179.125 | 0.88468657  | 0.1632  | 1.128  |
| 96271_at   | 2233.6  | 2035.9  | 2190.4  | 2396.5  | 2057.3  | 2245.1  | 2158.3  | 1988.3  | 0.318997411 | 2214.1   | 2112.25  | 101.85  | 1.048218724 | 0.3194  | -1.048 |
| 96272_at   | 588.2   | 870.8   | 729     | 873     | 550.5   | 540     | 550     | 923     | 0.328897417 | 765.25   | 640.875  | 124.375 | 1.194070607 | 0.2769  | -1.212 |
| 96273_at   | 7.8     | 4.5     | 33.7    | 17.2    | 65.7    | 19.2    | 9       | 10.6    | 0.5233871   | 15.8     | 26.125   | 10.325  | 0.604784689 | 0.5073  | 1.559  |
| 96275_f_at | 121.4   | 156.8   | 129     | 160.6   | 156.4   | 185.1   | 135.6   | 159     | 0.272209536 | 141.95   | 159.025  | 17.075  | 0.892626945 | 0.2706  | -1.122 |
| 96276_r_at | 376.2   | 431.6   | 371.2   | 980.4   | 308.2   | 596.4   | 255.9   | 443.3   | 0.444924589 | 539.85   | 400.95   | 138.9   | 1.346427235 | 0.4168  | -1.298 |
| 96277_at   | 461.3   | 535.1   | 457.6   | 500     | 311.9   | 499.2   | 554.3   | 526     | 0.801078841 | 488.5    | 472.85   | 15.65   | 1.033097177 | 0.7045  | -1.056 |
| 96278_at   | 593.7   | 583.7   | 488.2   | 639.2   | 419     | 528.8   | 373.1   | 648.8   | 0.285947474 | 576.2    | 492.425  | 83.775  | 1.170127431 | 0.2443  | -1.192 |
| 96280_at   | 2534.3  | 2232.2  | 1816.9  | 2339.4  | 2762.5  | 2083.1  | 2482.8  | 2002.6  | 0.677619628 | 2230.7   | 2332.75  | 102.05  | 0.956253349 | 0.6894  | -1.044 |
| 96281_at   | 4124.1  | 3453.5  | 3388.2  | 3787    | 3434.8  | 3944.9  | 3125.2  | 3360.6  | 0.394588124 | 3688.2   | 3466.375 | 221.825 | 1.063993365 | 0.3834  | -1.065 |
| 96283_at   | 4631.5  | 4726.7  | 4829.8  | 4754.8  | 5354.7  | 4914.7  | 5280.3  | 5018.1  | 0.023451624 | 4735.7   | 5141.95  | 406.25  | 0.920993008 | 0.01015 | -1.085 |
| 96284_at   | 520.5   | 1559.3  | 1279.2  | 1267.4  | 1286.3  | 1318.7  | 1403.8  | 1055.8  | 0.666943136 | 1156.6   | 1266.15  | 109.55  | 0.913477866 | 0.5457  | 1.176  |
| 96285_at   | 4483    | 3823.1  | 4039.5  | 4679.5  | 3535.3  | 4154    | 4518.1  | 4374.5  | 0.718273301 | 4256.275 | 4145.475 | 110.8   | 1.026727938 | 0.7142  | -1.028 |
| 96286_at   | 944.9   | 952.3   | 981.1   | 1062.4  | 846.9   | 922     | 917.6   | 1048.1  | 0.346791509 | 985.175  | 933.65   | 51.525  | 1.055186633 | 0.3225  | -1.057 |
| 96287_at   | 45.3    | 70.9    | 92.4    | 85.8    | 73.4    | 65.9    | 66.1    | 127.2   | 0.618849099 | 73.6     | 83.15    | 9.55    | 0.885147324 | 0.6204  | 1.124  |
| 96288_at   | 286.8   | 465.4   | 355.7   | 337.9   | 428.7   | 316.9   | 287.7   | 483     | 0.777338994 | 361.45   | 379.075  | 17.625  | 0.953505243 | 0.8059  | -1.042 |
| 96289_at   | 1976.3  | 1659.3  | 2059.3  | 1707.3  | 2366.2  | 1510.9  | 1796    | 1309.5  | 0.695885411 | 1850.55  | 1745.65  | 104.9   | 1.060092229 | 0.5879  | -1.082 |
| 96290_f_at | 14540.3 | 15097.2 | 15174.3 | 13232.4 | 23243.4 | 13440.8 | 18010.6 | 13177   | 0.378463137 | 14511.05 | 16967.95 | 2456.9  | 0.855203487 | 0.3837  | 1.139  |
| 96291_f_at | 3360.7  | 2696.3  | 2990.7  | 2618.7  | 3671    | 2594.7  | 2976.8  | 2445    | 0.987537123 | 2916.6   | 2921.875 | 5.275   | 0.998194652 | 0.9578  | -1.006 |
| 96292_r_at | 3098.2  | 2744.7  | 3134    | 2570    | 4154.5  | 2358    | 3162.1  | 2339.3  | 0.809567174 | 2886.725 | 3003.475 | 116.75  | 0.96112836  | 0.926   | -1.014 |
| 96293_at   | 1959.8  | 2062.5  | 2012.3  | 1649.3  | 2807    | 1464.8  | 1932.9  | 1773    | 0.821218948 | 1920.975 | 1994.425 | 73.45   | 0.963172343 | 0.9357  | -1.012 |
| 96294_s_at | 806.5   | 955.6   | 973.1   | 765.4   | 1437.4  | 678.5   | 931.6   | 745.5   | 0.707013227 | 875.15   | 948.25   | 73.1    | 0.922910625 | 0.8237  | -1.042 |
| 96295_at   | 2555.5  | 1926.6  | 2526.6  | 2229.6  | 1395.6  | 2040.3  | 1797.2  | 1644.9  | 0.025831382 | 2309.575 | 1719.5   | 590.075 | 1.343166618 | 0.02809 | -1.347 |
| 96296_at   | 631.9   | 562.5   | 604.4   | 568.6   | 762.3   | 463.8   | 680.5   | 631.3   | 0.553919687 | 591.85   | 634.475  | 42.625  | 0.932818472 | 0.6377  | -1.056 |
| 96297_at   | 766.2   | 504.8   | 534.2   | 586.3   | 506.9   | 485.9   | 533.2   | 492     | 0.209259954 | 597.875  | 504.5    | 93.375  | 1.185084242 | 0.148   | -1.17  |
| 96298_f_at | 15222.4 | 13064.5 | 14103   | 13262.1 | 19459.4 | 11379.7 | 14029.5 | 12062.6 | 0.875473685 | 13913    | 14232.8  | 319.8   | 0.977530774 | 0.9887  | -1.002 |



|            |         |         |         |         |         |         |         |         |             |           |           |          |             |          |        |
|------------|---------|---------|---------|---------|---------|---------|---------|---------|-------------|-----------|-----------|----------|-------------|----------|--------|
| 96299_at   | 2925.9  | 2878.5  | 2912.8  | 3363.7  | 2451.3  | 3239.4  | 2908.2  | 3379.3  | 0.91790201  | 3020.225  | 2994.55   | 25.675   | 1.008573909 | 0.8678   | -1.014 |
| 96300_f_at | 15439   | 14661.8 | 15428.5 | 13278.6 | 25079.6 | 13971.3 | 17270.1 | 14688.2 | 0.318662397 | 14701.975 | 17752.3   | 3050.325 | 0.828172969 | 0.2802   | 1.177  |
| 96301_at   | 658.8   | 772.9   | 818.5   | 638.3   | 909.5   | 735.4   | 799.8   | 776.7   | 0.198281841 | 722.125   | 805.35    | 83.225   | 0.896659837 | 0.1898   | 1.118  |
| 96302_at   | 1722.9  | 1780.8  | 1669.8  | 1884    | 1576    | 2141.7  | 1234.7  | 2238.7  | 0.898506239 | 1764.375  | 1797.775  | 33.4     | 0.981421479 | 0.9542   | -1.009 |
| 96305_at   | 1260.5  | 1016.9  | 918.6   | 1084.6  | 1073.2  | 952.2   | 920     | 882.8   | 0.233670708 | 1070.15   | 957.05    | 113.1    | 1.118175644 | 0.2186   | -1.114 |
| 96306_at   | 384.8   | 343.8   | 408.3   | 333.1   | 685     | 324.7   | 432.1   | 327.9   | 0.445120429 | 367.5     | 442.425   | 74.925   | 0.830649263 | 0.4693   | 1.15   |
| 96307_s_at | 19749.2 | 21200.8 | 19823.8 | 16330.8 | 38639.3 | 16761.9 | 24363.9 | 18857.3 | 0.35805284  | 19276.15  | 24655.6   | 5379.45  | 0.781816301 | 0.3487   | 1.217  |
| 96308_r_at | 389.5   | 297.9   | 658.3   | 191.5   | 886.8   | 320.9   | 722.9   | 295.8   | 0.375168538 | 384.3     | 556.6     | 172.3    | 0.690441969 | 0.385    | 1.428  |
| 96309_r_at | 32.7    | 14.9    | 90.8    | 10.8    | 76.4    | 29.9    | 14.3    | 19.3    | 0.923901893 | 37.3      | 34.975    | 2.325    | 1.066476054 | 0.9111   | -1.072 |
| 96310_at   | 183     | 224.9   | 242.6   | 223.4   | 223     | 217.6   | 262.6   | 232.4   | 0.377202993 | 218.475   | 233.9     | 15.425   | 0.934053014 | 0.3717   | -1.073 |
| 96311_at   | 159.8   | 118.8   | 128.4   | 156.6   | 69.4    | 124.2   | 102.6   | 85.1    | 0.027058475 | 140.9     | 95.325    | 45.575   | 1.478101233 | 0.03086  | -1.501 |
| 96313_at   | 11.5    | 17.7    | 7.8     | 1.5     | 25.3    | 10.9    | 0.7     | 2.8     | 0.965137361 | 9.625     | 9.925     | 0.3      | 0.9697733   | 0.7142   | -1.441 |
| 96316_at   | 20.6    | 26.6    | 49.6    | 30.2    | 32.6    | 21      | 33.2    | 20.3    | 0.522059199 | 31.75     | 26.775    | 4.975    | 1.185807656 | 0.5468   | -1.157 |
| 96318_at   | 1289.6  | 1401.2  | 1400.1  | 1094.6  | 2053.4  | 1299.8  | 1475.6  | 1099.8  | 0.444637586 | 1296.375  | 1482.15   | 185.775  | 0.874658435 | 0.4681   | 1.118  |
| 96319_at   | 1817.5  | 2522.8  | 2484.1  | 2110.6  | 2492.8  | 1778    | 2039.6  | 1792.7  | 0.41219546  | 2233.75   | 2025.775  | 207.975  | 1.102664412 | 0.406    | -1.104 |
| 96320_at   | 973.5   | 1436.5  | 1259.1  | 1262.6  | 1330.1  | 1229.2  | 1241    | 1346.5  | 0.623992036 | 1232.925  | 1286.7    | 53.775   | 0.958207041 | 0.5661   | -1.053 |
| 96321_at   | 3614.8  | 2664.1  | 2997.3  | 3230.2  | 2353.1  | 3001.3  | 2805.6  | 2419.7  | 0.108658187 | 3126.6    | 2644.925  | 481.675  | 1.182112914 | 0.1037   | -1.181 |
| 96322_at   | 1244.3  | 1281.6  | 1161.7  | 949.2   | 1912.4  | 1157    | 1233.9  | 1149.2  | 0.363034754 | 1159.2    | 1363.125  | 203.925  | 0.8503989   | 0.3391   | 1.156  |
| 96324_at   | 91.4    | 119.4   | 119.6   | 78.7    | 62.5    | 66.8    | 142.7   | 105.7   | 0.730135027 | 102.275   | 94.425    | 7.85     | 1.083134763 | 0.5997   | -1.13  |
| 96325_at   | 199.4   | 438.4   | 281.1   | 397.4   | 262     | 338.3   | 375.4   | 292.8   | 0.851421447 | 329.075   | 317.125   | 11.95    | 1.037682302 | 0.9977   | -1.001 |
| 96326_at   | 9.6     | 18.9    | 45.5    | 12      | 25      | 13.3    | 13.5    | 51.6    | 0.733887133 | 21.5      | 25.85     | 4.35     | 0.83172147  | 0.6683   | 1.236  |
| 96327_at   | 660.2   | 659.4   | 688     | 745.3   | 735.6   | 695.6   | 707.5   | 746.3   | 0.218485473 | 688.225   | 721.25    | 33.025   | 0.954211438 | 0.2      | -1.049 |
| 96329_at   | 2387.1  | 2492.2  | 2547.4  | 2126.8  | 2484    | 2164.2  | 2410.2  | 2359.1  | 0.779606191 | 2388.375  | 2354.375  | 34       | 1.0144412   | 0.7991   | -1.013 |
| 96331_at   | 927.8   | 696.6   | 734     | 1082.9  | 690.8   | 927.9   | 798.6   | 953     | 0.876150097 | 860.325   | 842.575   | 17.75    | 1.021066374 | 0.9222   | -1.013 |
| 96332_at   | 6.8     | 18.4    | 21.9    | 21.1    | 3.1     | 13.4    | 3.6     | 25.3    | 0.404081027 | 17.05     | 11.35     | 5.7      | 1.502202643 | 0.285    | -1.973 |
| 96333_g_at | 2044.3  | 1445.8  | 1890.6  | 1553.5  | 1278.8  | 1763    | 1319.2  | 1273.7  | 0.128823474 | 1733.55   | 1408.675  | 324.875  | 1.230624523 | 0.116    | -1.23  |
| 96334_f_at | 57.9    | 70.1    | 99.9    | 48.5    | 47.7    | 65.8    | 53      | 38.9    | 0.222456342 | 69.1      | 51.35     | 17.75    | 1.345666991 | 0.1939   | -1.32  |
| 96335_at   | 739.3   | 834.9   | 924     | 808.2   | 921.9   | 918.9   | 873.5   | 824.3   | 0.250467302 | 826.6     | 884.65    | 58.05    | 0.934380829 | 0.235    | -1.072 |
| 96336_at   | 7483    | 5618.4  | 7691.7  | 7384.7  | 4526.1  | 6443.2  | 5826.3  | 5100.8  | 0.049384331 | 7044.45   | 5474.1    | 1570.35  | 1.286869074 | 0.05464  | -1.288 |
| 96337_at   | 83.1    | 109.2   | 100.1   | 24.4    | 103.5   | 84.9    | 136     | 107.2   | 0.248388349 | 79.2      | 107.9     | 28.7     | 0.734012975 | 0.2717   | 1.551  |
| 96338_at   | 1163.8  | 1503    | 1465.5  | 1731.2  | 1592.6  | 1425.7  | 1878.5  | 1932.6  | 0.198875894 | 1465.875  | 1707.35   | 241.475  | 0.85856737  | 0.2056   | 1.167  |
| 96339_at   | 34.3    | 22.9    | 26.6    | 22.6    | 13.4    | 11.2    | 14.9    | 14      | 0.013110142 | 26.6      | 13.375    | 13.225   | 1.988785047 | 0.000998 | -1.976 |
| 96340_at   | 1500.4  | 1195.3  | 1489.4  | 1307.3  | 995.7   | 1469    | 1296    | 1064.3  | 0.257203475 | 1373.1    | 1206.25   | 166.85   | 1.138321244 | 0.2386   | -1.147 |
| 96341_at   | 1132.1  | 783.5   | 1079.8  | 823.1   | 823.1   | 913.6   | 791.1   | 992.2   | 0.490346072 | 954.625   | 880       | 74.625   | 1.084801136 | 0.5221   | -1.075 |
| 96342_at   | 958.7   | 961.3   | 952.9   | 770.1   | 1017    | 871.2   | 781.3   | 862.1   | 0.69586392  | 910.75    | 882.9     | 27.85    | 1.031543776 | 0.6985   | -1.032 |
| 96343_at   | 1226.9  | 1348.3  | 1052.7  | 1430.2  | 1278.3  | 1182.9  | 1275.5  | 1330.1  | 0.981425923 | 1264.525  | 1266.7    | 2.175    | 0.99828294  | 0.9209   | -1.007 |
| 96344_at   | 283.8   | 362.6   | 367.3   | 279.2   | 513.7   | 559.8   | 583.9   | 480.8   | 0.000733633 | 323.225   | 534.55    | 211.325  | 0.604667477 | 0.001087 | 1.663  |
| 96345_at   | 3194.9  | 3310.6  | 2496.4  | 2985.2  | 3612.7  | 3104.5  | 2779.8  | 3613.8  | 0.343027478 | 2996.775  | 3277.7    | 280.925  | 0.914292034 | 0.3573   | -1.093 |
| 96346_at   | 457.2   | 415.9   | 358.9   | 406     | 227.9   | 355.5   | 267.3   | 264.4   | 0.009644808 | 409.5     | 278.775   | 130.725  | 1.468926554 | 0.009639 | -1.483 |
| 96347_at   | 10.1    | 20.5    | 21.2    | 3.5     | 15.9    | 8.4     | 7.7     | 24      | 0.976641298 | 13.825    | 14        | 0.175    | 0.9875      | 0.8165   | 1.13   |
| 96348_at   | 654.8   | 734.2   | 537.3   | 728.7   | 569.2   | 744.4   | 774.8   | 763     | 0.488896215 | 663.75    | 712.85    | 49.1     | 0.931121554 | 0.5143   | -1.074 |
| 96351_at   | 783.5   | 635.2   | 818.5   | 817.9   | 479     | 873.7   | 492.7   | 741     | 0.329037805 | 763.775   | 646.6     | 117.175  | 1.181217136 | 0.2726   | -1.215 |
| 96352_at   | 1040.3  | 1111.8  | 1101.4  | 1040.2  | 1337.9  | 1018.9  | 1203.7  | 1038.8  | 0.389562963 | 1073.425  | 1149.825  | 76.4     | 0.933555106 | 0.3829   | -1.065 |
| 96353_at   | 1523.2  | 1612.7  | 1663.8  | 1370    | 1685.9  | 1585.1  | 1566.7  | 1413    | 0.820946151 | 1542.425  | 1562.675  | 20.25    | 0.987041451 | 0.8154   | -1.014 |
| 96354_at   | 1039.4  | 1087.5  | 1029.8  | 1090.8  | 974.7   | 1006.7  | 1044.8  | 891.9   | 0.079890666 | 1061.875  | 979.525   | 82.35    | 1.084071361 | 0.06805  | -1.086 |
| 96355_at   | 104.4   | 97.8    | 90.7    | 116.5   | 143.3   | 109.9   | 118.9   | 85.9    | 0.402435209 | 102.35    | 114.5     | 12.15    | 0.893886463 | 0.4329   | -1.105 |
| 96356_at   | 8.3     | 24      | 14.4    | 22.7    | 13.2    | 2       | 7.9     | 16.6    | 0.179879942 | 17.35     | 9.925     | 7.425    | 1.748110831 | 0.2202   | -2.093 |
| 96357_at   | 1021.9  | 917.4   | 947     | 961.9   | 1056.3  | 896.2   | 859     | 785.9   | 0.365301742 | 962.05    | 899.35    | 62.7     | 1.069717018 | 0.3136   | -1.075 |
| 96358_at   | 21845.6 | 22157.4 | 22771.4 | 18632.7 | 31163.7 | 19106.6 | 24502.8 | 20959   | 0.414590455 | 21351.775 | 23933.025 | 2581.25  | 0.892146939 | 0.4245   | 1.105  |
| 96359_at   | 2874.6  | 2723.9  | 3057.7  | 2884.3  | 2668.9  | 2883.8  | 2892    | 3067.6  | 0.949377381 | 2885.125  | 2878.075  | 7.05     | 1.002449554 | 0.9411   | -1.003 |
| 96360_at   | 2448.5  | 2942.9  | 2628.1  | 2743.6  | 2072.7  | 2821.8  | 2953.5  | 2327.1  | 0.55682935  | 2690.775  | 2543.775  | 147      | 1.05778813  | 0.5092   | -1.066 |
| 96365_at   | 2.3     | 11.1    | 2.1     | 6.4     | 29.1    | 17.2    | 18.5    | 1.2     | 0.150377091 | 5.475     | 16.5      | 11.025   | 0.331818182 | 0.3234   | 2.426  |
| 96367_at   | 51.5    | 80.9    | 81.9    | 77.1    | 56.6    | 93.3    | 72.3    | 87.5    | 0.690401243 | 72.85     | 77.425    | 4.575    | 0.940910559 | 0.7168   | -1.062 |
| 96373_at   | 2.6     | 10.2    | 33.8    | 21.9    | 43.8    | 16.3    | 15.3    | 30.8    | 0.364357296 | 17.125    | 26.55     | 9.425    | 0.645009416 | 0.2947   | 2.031  |
| 96374_at   | 19.5    | 4.2     | 34.8    | 5.4     | 7.7     | 12.8    | 5       | 24      | 0.683515527 | 15.975    | 12.375    | 3.6      | 1.290909091 | 0.9175   | -1.068 |
| 96375_at   | 156.1   | 174.5   | 188.8   | 274.7   | 196.1   | 230.9   | 148     | 283.8   | 0.691700703 | 198.525   | 214.7     | 16.175   | 0.92466232  | 0.7008   | -1.077 |



|            |        |        |        |        |        |        |        |        |             |         |         |         |             |          |        |
|------------|--------|--------|--------|--------|--------|--------|--------|--------|-------------|---------|---------|---------|-------------|----------|--------|
| 96387_at   | 11     | 6.4    | 24.2   | 8.8    | 11.7   | 7.4    | 9.4    | 39     | 0.63531482  | 12.6    | 16.875  | 4.275   | 0.746666667 | 0.704    | 1.204  |
| 96388_at   | 12.7   | 9.7    | 24.5   | 9.6    | 30.4   | 7      | 9.8    | 44.5   | 0.410369259 | 14.125  | 22.925  | 8.8     | 0.616139586 | 0.5785   | 1.337  |
| 96389_at   | 25.9   | 29     | 50     | 26.5   | 42.5   | 50.3   | 22.4   | 18.9   | 0.946184844 | 32.85   | 33.525  | 0.675   | 0.979865772 | 0.9347   | -1.025 |
| 96390_at   | 5.2    | 17.9   | 14.7   | 25.9   | 3.6    | 3.1    | 25.4   | 21.4   | 0.737989239 | 15.925  | 13.375  | 2.55    | 1.190654206 | 0.5268   | -1.56  |
| 96391_at   | 730.7  | 1249   | 1160.5 | 1115.8 | 790.8  | 831.2  | 947.8  | 978.5  | 0.225481131 | 1064    | 887.075 | 176.925 | 1.199447623 | 0.2539   | -1.18  |
| 96392_at   | 70.8   | 45.5   | 70.4   | 96.7   | 82.4   | 84.5   | 86.4   | 45.3   | 0.799916947 | 70.85   | 74.65   | 3.8     | 0.94909578  | 0.8116   | -1.056 |
| 96393_at   | 46.2   | 11.3   | 13.2   | 49.8   | 10.1   | 9.1    | 11.4   | 9.2    | 0.146357845 | 30.125  | 9.95    | 20.175  | 3.027638191 | 0.06645  | -2.445 |
| 96394_at   | 23.1   | 9.3    | 11.6   | 6.8    | 18.4   | 23.5   | 11.6   | 13.9   | 0.391143891 | 12.7    | 16.85   | 4.15    | 0.753709199 | 0.2833   | 1.428  |
| 96400_at   | 17.9   | 12.4   | 4      | 1.2    | 1.6    | 5.9    | 1.8    | 15.3   | 0.605973667 | 8.875   | 6.15    | 2.725   | 1.443089431 | 0.6778   | -1.424 |
| 96408_at   | 5.7    | 4.3    | 4.7    | 4.4    | 4.6    | 4.3    | 4.6    | 4.1    | 0.337085002 | 4.775   | 4.4     | 0.375   | 1.085227273 | 0.3355   | -1.074 |
| 96413_at   | 1.8    | 4      | 2.4    | 5      | 11.2   | 19.4   | 4.8    | 11.1   | 0.065181863 | 3.3     | 11.625  | 8.325   | 0.283870968 | 0.01629  | 3.359  |
| 96414_at   | 29.2   | 20     | 39.4   | 21.1   | 41.4   | 32.3   | 5.4    | 29.2   | 0.970170454 | 27.425  | 27.075  | 0.35    | 1.012927054 | 0.6849   | -1.233 |
| 96416_f_at | 663.8  | 666    | 618.6  | 731.3  | 643.2  | 560.9  | 565.4  | 761.6  | 0.513723523 | 669.925 | 632.775 | 37.15   | 1.058709652 | 0.4568   | -1.065 |
| 96417_s_at | 15.2   | 16     | 17.6   | 7.1    | 23     | 10.8   | 7.9    | 7.3    | 0.707749615 | 13.975  | 12.25   | 1.725   | 1.140816327 | 0.5965   | -1.206 |
| 96418_r_at | 190.3  | 302.2  | 335.2  | 302.5  | 262.2  | 267.9  | 223    | 324    | 0.740067767 | 282.55  | 269.275 | 13.275  | 1.049299044 | 0.8223   | -1.035 |
| 96419_f_at | 11.4   | 19.6   | 19.9   | 26.4   | 12.9   | 18     | 19     | 19     | 0.568298896 | 19.325  | 17.225  | 2.1     | 1.12191582  | 0.6863   | -1.087 |
| 96420_at   | 9.4    | 21.7   | 6.2    | 12.4   | 33.9   | 6.8    | 18.1   | 9.6    | 0.533059727 | 12.425  | 17.1    | 4.675   | 0.726608187 | 0.619    | 1.261  |
| 96421_at   | 5.6    | 6.1    | 3.2    | 6.4    | 24.5   | 17     | 2.9    | 31.1   | 0.110306749 | 5.325   | 18.875  | 13.55   | 0.282119205 | 0.1262   | 2.704  |
| 96422_at   | 99.9   | 16.9   | 75.4   | 73.3   | 69.5   | 65.8   | 91     | 52.5   | 0.871166105 | 66.375  | 69.7    | 3.325   | 0.952295552 | 0.6286   | 1.236  |
| 96423_at   | 83.8   | 124    | 104.9  | 124.8  | 84.3   | 93.7   | 91.3   | 61.7   | 0.073944899 | 109.375 | 82.75   | 26.625  | 1.321752266 | 0.08251  | -1.322 |
| 96424_at   | 121.4  | 109.4  | 170.3  | 128.2  | 183.4  | 134.4  | 137.6  | 136    | 0.416563803 | 132.325 | 147.85  | 15.525  | 0.894994927 | 0.3742   | 1.123  |
| 96426_at   | 8919.6 | 7047.5 | 7250.3 | 6256.6 | 8833.7 | 6921.4 | 6435.9 | 6969.6 | 0.922253756 | 7368.5  | 7290.15 | 78.35   | 1.010747378 | 0.926    | -1.01  |
| 96431_at   | 6      | 5.8    | 18.6   | 2.2    | 16.2   | 10     | 5.1    | 24.6   | 0.333807561 | 8.15    | 13.975  | 5.825   | 0.583184258 | 0.2728   | 1.945  |
| 96433_at   | 23.6   | 27.2   | 14     | 17.4   | 32.3   | 21.3   | 18.2   | 13.8   | 0.869528092 | 20.55   | 21.4    | 0.85    | 0.960280374 | 0.9235   | -1.024 |
| 96435_at   | 443.7  | 465.6  | 482    | 545.3  | 614.4  | 557.8  | 688.8  | 524.8  | 0.044696295 | 484.15  | 596.45  | 112.3   | 0.811719339 | 0.03161  | 1.229  |
| 96464_at   | 465.1  | 602.2  | 579.7  | 619.9  | 509.8  | 628.9  | 435.4  | 439.1  | 0.311844461 | 566.725 | 503.3   | 63.425  | 1.126018279 | 0.2951   | -1.132 |
| 96474_at   | 170.2  | 104.6  | 165.7  | 112.1  | 119.6  | 186.6  | 125.6  | 53.3   | 0.623070351 | 138.15  | 121.275 | 16.875  | 1.139146568 | 0.5221   | -1.219 |
| 96481_at   | 36.8   | 50.2   | 26.9   | 42.5   | 48.5   | 46.9   | 48.6   | 41.9   | 0.232895695 | 39.1    | 46.475  | 7.375   | 0.841312534 | 0.202    | 1.216  |
| 96482_at   | 1.9    | 2.9    | 3.3    | 3.4    | 2.6    | 3.2    | 10.7   | 2.9    | 0.388941871 | 2.875   | 4.85    | 1.975   | 0.592783505 | 0.3641   | 1.422  |
| 96483_at   | 8.1    | 32.8   | 28.8   | 24     | 6.3    | 7.6    | 22.7   | 14     | 0.159083873 | 23.425  | 12.65   | 10.775  | 1.851778656 | 0.2015   | -1.862 |
| 96484_at   | 4.3    | 17.1   | 4      | 10     | 20.6   | 7      | 1.7    | 3      | 0.889185598 | 8.85    | 8.075   | 0.775   | 1.095975232 | 0.6143   | -1.404 |
| 96485_at   | 14.1   | 9.5    | 11.6   | 14.7   | 27.7   | 14.3   | 15.8   | 13.1   | 0.220743426 | 12.475  | 17.725  | 5.25    | 0.703808181 | 0.1532   | 1.377  |
| 96486_at   | 28     | 10.7   | 33.5   | 23     | 50.7   | 22.2   | 35.5   | 70.8   | 0.138218568 | 23.8    | 44.8    | 21      | 0.53125     | 0.1274   | 1.87   |
| 96487_at   | 25.6   | 8.5    | 26.5   | 16.1   | 40.4   | 27.7   | 2.8    | 15     | 0.812610732 | 19.175  | 21.475  | 2.3     | 0.892898719 | 0.8022   | -1.185 |
| 96488_at   | 3.4    | 5.3    | 11.2   | 4.9    | 5.6    | 6.5    | 2.7    | 5.8    | 0.609523038 | 6.2     | 5.15    | 1.05    | 1.203883495 | 0.6826   | -1.148 |
| 96489_at   | 24.4   | 16.1   | 19.5   | 7.3    | 19.1   | 20.5   | 17.8   | 19.1   | 0.570988441 | 16.825  | 19.125  | 2.3     | 0.879738562 | 0.4456   | 1.242  |
| 96490_at   | 34.5   | 107.5  | 74.5   | 105    | 91.6   | 115.6  | 55.3   | 128.1  | 0.488005574 | 80.375  | 97.65   | 17.275  | 0.823092678 | 0.4923   | 1.268  |
| 96491_at   | 354    | 218.1  | 315.4  | 337.9  | 250.3  | 255.3  | 273.1  | 299.1  | 0.321823535 | 306.35  | 269.45  | 36.9    | 1.13694563  | 0.3696   | -1.12  |
| 96492_at   | 4.7    | 10.7   | 4.4    | 5.9    | 14.4   | 24.4   | 9.2    | 6.4    | 0.168352502 | 6.425   | 13.6    | 7.175   | 0.472426471 | 0.09899  | 1.994  |
| 96493_at   | 201.5  | 209.3  | 250.2  | 232.6  | 333.1  | 262.7  | 256.4  | 266.2  | 0.044711709 | 223.4   | 279.6   | 56.2    | 0.798998569 | 0.02973  | 1.249  |
| 96494_at   | 160.2  | 152.5  | 176.7  | 199.9  | 100.9  | 225.2  | 109.5  | 140.8  | 0.405932814 | 172.325 | 144.1   | 28.225  | 1.195870923 | 0.2812   | -1.253 |
| 96495_at   | 145.4  | 63.5   | 171.1  | 218.4  | 209.2  | 152.3  | 208.4  | 178    | 0.347682133 | 149.6   | 186.975 | 37.375  | 0.800106966 | 0.3116   | 1.36   |
| 96496_g_at | 33.4   | 26.9   | 45.1   | 15.3   | 37.3   | 42.9   | 13.5   | 47.4   | 0.621484685 | 30.175  | 35.275  | 5.1     | 0.855421687 | 0.7479   | 1.132  |
| 96497_s_at | 16.8   | 13.3   | 30.1   | 7.4    | 34.1   | 11.6   | 32.8   | 38.7   | 0.161611132 | 16.9    | 29.3    | 12.4    | 0.576791809 | 0.2017   | 1.782  |
| 96498_at   | 45.2   | 45.9   | 53.2   | 80.4   | 81.2   | 73.9   | 78.5   | 84.6   | 0.062055076 | 56.175  | 79.55   | 23.375  | 0.706159648 | 0.03373  | 1.456  |
| 96499_at   | 2      | 6.4    | 1.4    | 1.6    | 13     | 10.5   | 1.1    | 3.4    | 0.247186543 | 2.85    | 7       | 4.15    | 0.407142857 | 0.3234   | 2.056  |
| 96500_at   | 9.9    | 11.2   | 7      | 12.1   | 12.5   | 7.9    | 46.2   | 17.7   | 0.291090587 | 10.05   | 21.075  | 11.025  | 0.476868327 | 0.2252   | 1.704  |
| 96501_at   | 5.2    | 9.1    | 23.8   | 8.2    | 15.8   | 12.9   | 15.5   | 19.7   | 0.377522598 | 11.575  | 15.975  | 4.4     | 0.72456964  | 0.2001   | 1.61   |
| 96502_at   | 21     | 19.1   | 20.9   | 30.5   | 6.3    | 19.4   | 17.3   | 27.4   | 0.345810935 | 22.875  | 17.6    | 5.275   | 1.299715909 | 0.3069   | -1.452 |
| 96503_at   | 27.4   | 9.4    | 11.9   | 12.7   | 18.6   | 18.8   | 14.5   | 12.4   | 0.876565673 | 15.35   | 16.075  | 0.725   | 0.954898911 | 0.6522   | 1.127  |
| 96504_at   | 21.8   | 28.8   | 35.2   | 20.3   | 55.6   | 131.6  | 108.3  | 183.2  | 0.037784993 | 26.525  | 119.675 | 93.15   | 0.221641947 | 0.002154 | 4.244  |
| 96505_at   | 14.8   | 16.3   | 19.1   | 102.2  | 16.1   | 24.6   | 23.8   | 53.8   | 0.729548631 | 38.1    | 29.575  | 8.525   | 1.288250211 | 0.9745   | -1.018 |
| 96506_at   | 240    | 259.6  | 294.7  | 365.9  | 346.3  | 278.7  | 331.3  | 399.6  | 0.237273027 | 290.05  | 338.975 | 48.925  | 0.855667822 | 0.2228   | 1.174  |
| 96507_at   | 16.5   | 24.9   | 20.5   | 23.2   | 29.9   | 17.7   | 22.3   | 34.3   | 0.309204602 | 21.275  | 26.05   | 4.775   | 0.816698656 | 0.3389   | 1.198  |
| 96508_at   | 123.4  | 136.5  | 165    | 165.9  | 53.7   | 123    | 56.2   | 95     | 0.020126562 | 147.7   | 81.975  | 65.725  | 1.801768832 | 0.02454  | -1.902 |
| 96509_at   | 6.6    | 24.5   | 24     | 21.7   | 29.1   | 3      | 14.4   | 8      | 0.462977885 | 19.2    | 13.625  | 5.575   | 1.409174312 | 0.3912   | -1.698 |



|            |        |        |        |        |        |        |        |        |             |          |          |         |             |         |        |
|------------|--------|--------|--------|--------|--------|--------|--------|--------|-------------|----------|----------|---------|-------------|---------|--------|
| 96510_at   | 92.6   | 57     | 54.7   | 79.8   | 68.7   | 107.3  | 72.3   | 71.4   | 0.517535214 | 71.025   | 79.925   | 8.9     | 0.888645605 | 0.479   | 1.133  |
| 96511_s_at | 54.8   | 47.4   | 63     | 54.4   | 67.7   | 40.8   | 95.1   | 43.9   | 0.624824131 | 54.9     | 61.875   | 6.975   | 0.887272727 | 0.764   | -1.067 |
| 96512_at   | 159.7  | 258.3  | 287    | 205.3  | 198.9  | 195    | 201.4  | 221.3  | 0.472001999 | 227.575  | 204.15   | 23.425  | 1.114744061 | 0.5454  | -1.089 |
| 96513_at   | 96.9   | 111.3  | 105.4  | 244.4  | 113    | 184.8  | 101.2  | 336.9  | 0.520904613 | 139.5    | 183.975  | 44.475  | 0.758255198 | 0.5245  | 1.265  |
| 96514_at   | 113.5  | 100    | 63.9   | 137.9  | 58     | 65.4   | 122.8  | 70.2   | 0.29153317  | 103.825  | 79.1     | 24.725  | 1.312579014 | 0.2755  | -1.323 |
| 96515_at   | 6.4    | 9.3    | 7.8    | 13.7   | 9.9    | 12     | 8.4    | 5.1    | 0.840961153 | 9.3      | 8.85     | 0.45    | 1.050847458 | 0.821   | -1.06  |
| 96516_at   | 32.2   | 39.3   | 69.3   | 63     | 44     | 47.4   | 48.8   | 52.7   | 0.784285008 | 50.95    | 48.225   | 2.725   | 1.056505962 | 0.9714  | -1.007 |
| 96517_at   | 25.4   | 22.9   | 25.9   | 16.7   | 34.3   | 25.7   | 36.2   | 18.6   | 0.255030083 | 22.725   | 28.7     | 5.975   | 0.791811847 | 0.2893  | 1.238  |
| 96518_at   | 9      | 50.1   | 13.7   | 33.2   | 16.6   | 53.7   | 24.6   | 20.2   | 0.863689564 | 26.5     | 28.775   | 2.275   | 0.920938315 | 0.6966  | 1.212  |
| 96519_at   | 93.7   | 61.3   | 54.9   | 38.6   | 61.2   | 47.7   | 88.6   | 67     | 0.790670393 | 62.125   | 66.125   | 4       | 0.939508507 | 0.7053  | -1.092 |
| 96520_at   | 29.5   | 30.1   | 31     | 36.9   | 2.7    | 24.6   | 18.7   | 28.2   | 0.094922272 | 31.875   | 18.55    | 13.325  | 1.718328841 | 0.1753  | -2.316 |
| 96521_at   | 96.6   | 79.8   | 65     | 54.5   | 26.5   | 103.8  | 83.7   | 98.7   | 0.842605024 | 73.975   | 78.175   | 4.2     | 0.946274384 | 0.8994  | -1.047 |
| 96522_at   | 5200.2 | 4273.5 | 4860.3 | 4821.9 | 5281.3 | 4444   | 4271.3 | 4334.3 | 0.523410173 | 4788.975 | 4582.725 | 206.25  | 1.045005974 | 0.5049  | -1.046 |
| 96523_at   | 46.4   | 33.5   | 59.5   | 11.3   | 31.3   | 14.4   | 50.3   | 84.6   | 0.697764891 | 37.675   | 45.15    | 7.475   | 0.834440753 | 0.7813  | 1.165  |
| 96524_at   | 439.6  | 550.9  | 549.3  | 546.9  | 555.2  | 657.9  | 754.6  | 529    | 0.145277737 | 521.675  | 624.175  | 102.5   | 0.835783234 | 0.1283  | 1.19   |
| 96525_at   | 7.8    | 11.5   | 12.7   | 8.8    | 12.4   | 13.1   | 12.3   | 21     | 0.124037833 | 10.2     | 14.7     | 4.5     | 0.693877551 | 0.08163 | 1.432  |
| 96526_at   | 598.3  | 760.5  | 693.9  | 802    | 927.6  | 786.4  | 819.1  | 918.9  | 0.041061154 | 713.675  | 863      | 149.325 | 0.826969873 | 0.04437 | 1.213  |
| 96527_at   | 199.3  | 155.1  | 193.3  | 203.9  | 209.4  | 183.5  | 227.2  | 219.6  | 0.185035915 | 187.9    | 209.925  | 22.025  | 0.895081577 | 0.1985  | 1.12   |
| 96528_at   | 20.6   | 28.6   | 22.8   | 19.6   | 14.1   | 19.3   | 26.7   | 29.2   | 0.891472355 | 22.9     | 22.325   | 0.575   | 1.025755879 | 0.7784  | -1.056 |
| 96529_at   | 99.5   | 116.8  | 91.1   | 193.3  | 66     | 102.4  | 89.5   | 144.6  | 0.426602843 | 125.175  | 100.625  | 24.55   | 1.243975155 | 0.3981  | -1.237 |
| 96530_at   | 361.9  | 541.9  | 452.6  | 529.4  | 355.3  | 567.7  | 553.1  | 517.7  | 0.688689116 | 471.45   | 498.45   | 27      | 0.945832079 | 0.7316  | -1.053 |
| 96531_at   | 638.5  | 534.5  | 798.2  | 651.5  | 489.8  | 537.3  | 405.3  | 393.9  | 0.026316675 | 655.675  | 456.575  | 199.1   | 1.436072934 | 0.0176  | -1.434 |
| 96532_at   | 141.9  | 166.6  | 109.6  | 266.6  | 189.5  | 238    | 130.8  | 364.8  | 0.365261167 | 171.175  | 230.775  | 59.6    | 0.74173979  | 0.3568  | 1.329  |
| 96533_at   | 72.7   | 110.4  | 92.8   | 105.6  | 126.5  | 106.2  | 112.9  | 171.8  | 0.104931434 | 95.375   | 129.35   | 33.975  | 0.737340549 | 0.07986 | 1.349  |
| 96534_at   | 29.6   | 27.1   | 40.2   | 20.4   | 24.8   | 26.8   | 46.6   | 39.7   | 0.469266401 | 29.325   | 34.475   | 5.15    | 0.850616389 | 0.4808  | 1.168  |
| 96535_at   | 138.4  | 252.8  | 203.5  | 253.4  | 187.4  | 173.9  | 142.4  | 284.3  | 0.726273187 | 212.025  | 197      | 15.025  | 1.076269036 | 0.7133  | -1.082 |
| 96536_at   | 42.7   | 24.1   | 43.1   | 20.4   | 73.2   | 45.4   | 46     | 54.2   | 0.046600743 | 32.575   | 54.7     | 22.125  | 0.595521024 | 0.04765 | 1.741  |
| 96537_at   | 6.1    | 6.3    | 7.5    | 4.7    | 5.8    | 9.9    | 8.7    | 12.3   | 0.107537772 | 6.15     | 9.175    | 3.025   | 0.670299728 | 0.08473 | 1.46   |
| 96538_at   | 6.6    | 4.6    | 9.8    | 6.1    | 8.1    | 4.4    | 7.4    | 5.8    | 0.807876606 | 6.775    | 6.425    | 0.35    | 1.054474708 | 0.8362  | -1.046 |
| 96539_at   | 300.2  | 208.7  | 233.1  | 297.9  | 161.4  | 204.3  | 282.3  | 276.4  | 0.469269437 | 259.975  | 231.1    | 28.875  | 1.124945911 | 0.4467  | -1.14  |
| 96540_at   | 17.6   | 9.3    | 12.3   | 11.3   | 12.9   | 11.7   | 16.5   | 15     | 0.529225591 | 12.625   | 14.025   | 1.4     | 0.900178253 | 0.4447  | 1.134  |
| 96541_at   | 396    | 524.8  | 429.1  | 417.8  | 525.2  | 523.4  | 487.8  | 468.5  | 0.128701875 | 441.925  | 501.225  | 59.3    | 0.88168986  | 0.1014  | 1.14   |
| 96542_at   | 3800.6 | 4598.8 | 4640   | 5078.9 | 3999.7 | 5319   | 3812.2 | 5149.4 | 0.934426271 | 4529.575 | 4570.075 | 40.5    | 0.991138001 | 0.9749  | -1.003 |
| 96543_at   | 1.8    | 2.2    | 3.3    | 3      | 3.6    | 2.8    | 2      | 2.9    | 0.61934547  | 2.575    | 2.825    | 0.25    | 0.911504425 | 0.6191  | 1.1    |
| 96544_at   | 4.2    | 2.4    | 5.7    | 2.4    | 9.2    | 2.5    | 4.6    | 6.9    | 0.258278864 | 3.675    | 5.8      | 2.125   | 0.63362069  | 0.2893  | 1.518  |
| 96545_s_at | 238.4  | 238.5  | 213.9  | 286.9  | 159.7  | 259.8  | 216.9  | 282.9  | 0.659565307 | 244.425  | 229.825  | 14.6    | 1.063526596 | 0.5952  | -1.082 |
| 96546_r_at | 2225.4 | 2369.1 | 2634.6 | 2362.6 | 2426.5 | 2281.9 | 2468.3 | 2739.1 | 0.550954941 | 2397.925 | 2478.95  | 81.025  | 0.967314791 | 0.5482  | -1.033 |
| 96547_at   | 18.1   | 11.2   | 9      | 6.3    | 9.4    | 15.7   | 9.2    | 14.5   | 0.743146482 | 11.15    | 12.2     | 1.05    | 0.913934426 | 0.6318  | 1.14   |
| 96548_at   | 4.6    | 19.6   | 11     | 5.3    | 3.4    | 16     | 2.5    | 6.1    | 0.526802219 | 10.125   | 7        | 3.125   | 1.446428571 | 0.4206  | -1.581 |
| 96549_at   | 48.6   | 85.4   | 9.5    | 9.5    | 43     | 11.8   | 17.7   | 12.9   | 0.438623765 | 38.25    | 21.35    | 16.9    | 1.791569087 | 0.6641  | -1.338 |
| 96550_at   | 58.3   | 117.2  | 98.4   | 87.7   | 39.4   | 73.4   | 60.6   | 63.4   | 0.082067703 | 90.4     | 59.2     | 31.2    | 1.527027027 | 0.08188 | -1.517 |
| 96551_at   | 24.2   | 5.8    | 29.4   | 29.2   | 33.7   | 13     | 7.3    | 23     | 0.731168501 | 22.15    | 19.25    | 2.9     | 1.150649351 | 0.8195  | -1.131 |
| 96552_at   | 266.9  | 201.4  | 271.2  | 242.9  | 285.5  | 232.2  | 211.3  | 271.5  | 0.853473093 | 245.6    | 250.125  | 4.525   | 0.981909045 | 0.8608  | -1.018 |
| 96553_at   | 18.1   | 34     | 28     | 14.3   | 13     | 13.5   | 30.2   | 18.4   | 0.454434163 | 23.6     | 18.775   | 4.825   | 1.256990679 | 0.4345  | -1.261 |
| 96554_r_at | 29.8   | 30.2   | 42     | 41.1   | 61.1   | 42.5   | 31.8   | 60.2   | 0.166501101 | 35.775   | 48.9     | 13.125  | 0.731595092 | 0.1614  | 1.339  |
| 96555_at   | 76.1   | 99.7   | 78.1   | 65.8   | 120.9  | 129    | 93.7   | 92.2   | 0.051840688 | 79.925   | 108.95   | 29.025  | 0.733593391 | 0.04431 | 1.363  |
| 96556_at   | 12.1   | 9.2    | 9.7    | 10.5   | 5.2    | 6.3    | 13.6   | 16     | 0.972980018 | 10.375   | 10.275   | 0.1     | 1.00973236  | 0.6934  | -1.124 |
| 96557_at   | 269.1  | 514.9  | 417    | 409.7  | 345.9  | 622.8  | 502.3  | 522.2  | 0.257841061 | 402.675  | 498.3    | 95.625  | 0.808097532 | 0.2815  | 1.243  |
| 96558_at   | 213.8  | 190.3  | 199.3  | 188.4  | 221.1  | 231.7  | 199.7  | 169.2  | 0.643271922 | 197.95   | 205.425  | 7.475   | 0.963612024 | 0.6928  | -1.032 |
| 96559_at   | 23.6   | 33.1   | 22.5   | 21.9   | 33     | 37.7   | 12.5   | 8.2    | 0.772093768 | 25.275   | 22.85    | 2.425   | 1.106126915 | 0.5002  | -1.316 |
| 96560_at   | 171.5  | 165    | 154.6  | 272.3  | 143.6  | 198.6  | 178.5  | 286.4  | 0.798491354 | 190.85   | 201.775  | 10.925  | 0.945855532 | 0.8029  | -1.052 |
| 96561_at   | 127    | 212.6  | 146.4  | 191.3  | 172.2  | 148.6  | 153.6  | 147.5  | 0.542133929 | 169.325  | 155.475  | 13.85   | 1.089081846 | 0.6109  | -1.069 |
| 96562_at   | 121.8  | 124.8  | 154.5  | 158    | 157.5  | 202.8  | 158.4  | 143.4  | 0.16385932  | 139.775  | 165.525  | 25.75   | 0.844434375 | 0.1481  | 1.183  |
| 96563_at   | 349.2  | 410.5  | 353.4  | 393    | 212.5  | 358.2  | 347.3  | 360.9  | 0.217482371 | 376.525  | 319.725  | 56.8    | 1.17765267  | 0.2215  | -1.202 |
| 96564_at   | 5793.3 | 5887.1 | 6012.3 | 7223.8 | 6442.3 | 5742.1 | 5865.5 | 6229.2 | 0.688510017 | 6229.125 | 6069.775 | 159.35  | 1.026253032 | 0.7052  | -1.023 |
| 96565_at   | 103.1  | 128.6  | 213.5  | 85.4   | 153.3  | 127.7  | 168.1  | 162.3  | 0.538273107 | 132.65   | 152.85   | 20.2    | 0.867844292 | 0.3759  | 1.219  |



|            |         |         |         |         |         |         |         |         |             |           |          |          |             |         |        |
|------------|---------|---------|---------|---------|---------|---------|---------|---------|-------------|-----------|----------|----------|-------------|---------|--------|
| 96566_at   | 7.1     | 22.8    | 23.5    | 39      | 6.5     | 33      | 47.7    | 20.4    | 0.741259862 | 23.1      | 26.9     | 3.8      | 0.858736059 | 0.8872  | -1.087 |
| 96567_at   | 5.5     | 4       | 6.2     | 13.9    | 15.7    | 6.6     | 13.6    | 8.7     | 0.266233502 | 7.4       | 11.15    | 3.75     | 0.66367713  | 0.2074  | 1.599  |
| 96568_at   | 5.2     | 6.7     | 8.6     | 4.8     | 7.3     | 8.6     | 6.6     | 6.5     | 0.394594147 | 6.325     | 7.25     | 0.925    | 0.872413793 | 0.3243  | 1.17   |
| 96569_at   | 475.5   | 447.1   | 424.5   | 337     | 464.5   | 484.6   | 423.7   | 674.2   | 0.215092203 | 421.025   | 511.75   | 90.725   | 0.82271617  | 0.1882  | 1.206  |
| 96570_at   | 60.2    | 55.1    | 61.4    | 92.6    | 41.5    | 56.4    | 37.1    | 69.2    | 0.199141804 | 67.325    | 51.05    | 16.275   | 1.318805093 | 0.1704  | -1.331 |
| 96571_at   | 5.2     | 14.5    | 16.6    | 11.9    | 9.8     | 5.6     | 17.5    | 12.7    | 0.859610827 | 12.05     | 11.4     | 0.65     | 1.057017544 | 0.892   | -1.051 |
| 96572_at   | 136.2   | 82.7    | 88.3    | 111.2   | 112.5   | 81.6    | 98.9    | 92.1    | 0.575452742 | 104.6     | 96.275   | 8.325    | 1.086471046 | 0.6143  | -1.073 |
| 96573_at   | 13568.5 | 14563.4 | 13471.8 | 13277.5 | 16313   | 12755.5 | 14976.6 | 13332.3 | 0.509426487 | 13720.3   | 14344.35 | 624.05   | 0.956495066 | 0.5226  | -1.041 |
| 96574_at   | 51.3    | 78.2    | 55.5    | 85.4    | 62.5    | 77.2    | 65.3    | 39.4    | 0.592935524 | 67.6      | 61.1     | 6.5      | 1.106382979 | 0.5954  | -1.113 |
| 96575_at   | 16835.6 | 18120.7 | 17215.1 | 15129.1 | 25867.5 | 14593.2 | 18790.3 | 17085   | 0.425555241 | 16825.125 | 19084    | 2258.875 | 0.881635139 | 0.4363  | -1.111 |
| 96576_at   | 4.1     | 5.8     | 6.8     | 4.3     | 12.9    | 3       | 4.8     | 5.4     | 0.609332569 | 5.25      | 6.525    | 1.275    | 0.804597701 | 0.78    | -1.1   |
| 96577_i_at | 523.4   | 588.9   | 496.5   | 584.9   | 471.5   | 608.2   | 544.1   | 507.8   | 0.690697664 | 548.425   | 532.9    | 15.525   | 1.029133046 | 0.6722  | -1.031 |
| 96578_r_at | 590.7   | 574     | 502     | 771.3   | 668.8   | 745.8   | 687.6   | 745.6   | 0.171759792 | 609.5     | 711.95   | 102.45   | 0.856099445 | 0.1273  | 1.181  |
| 96579_at   | 217     | 142.8   | 127.9   | 141.3   | 118.6   | 111.7   | 104.4   | 91.8    | 0.083035448 | 157.25    | 106.625  | 50.625   | 1.474794842 | 0.02873 | -1.449 |
| 96580_at   | 414.3   | 440.1   | 434.3   | 364.3   | 398.5   | 489.9   | 403.9   | 457.9   | 0.419850006 | 413.25    | 437.55   | 24.3     | 0.94446349  | 0.4275  | -1.058 |
| 96581_at   | 5.1     | 4.6     | 6.7     | 5.3     | 13.2    | 8.4     | 5.4     | 8.7     | 0.114739919 | 5.425     | 8.925    | 3.5      | 0.607843137 | 0.05737 | 1.586  |
| 96582_at   | 4.7     | 20.5    | 6.8     | 36.4    | 5.9     | 62.5    | 29.9    | 9       | 0.545642698 | 17.1      | 26.825   | 9.725    | 0.637465051 | 0.639   | 1.429  |
| 96583_s_at | 12.8    | 39.5    | 17.5    | 40      | 41.8    | 27.9    | 24.1    | 55.3    | 0.368065227 | 27.45     | 37.275   | 9.825    | 0.736418511 | 0.3247  | 1.449  |
| 96584_f_at | 51.9    | 13.5    | 36.4    | 57.9    | 17.7    | 45.6    | 68.3    | 32.4    | 0.943741445 | 39.925    | 41       | 1.075    | 0.973780488 | 0.9174  | -1.048 |
| 96585_at   | 24.1    | 70.5    | 65.2    | 78.1    | 56.8    | 68.4    | 54.6    | 79.1    | 0.712990368 | 59.475    | 64.725   | 5.25     | 0.918887601 | 0.5847  | 1.179  |
| 96586_at   | 5.6     | 4.9     | 5.2     | 6.3     | 7.6     | 4.7     | 7.1     | 5.9     | 0.309759431 | 5.5       | 6.325    | 0.825    | 0.869565217 | 0.3347  | 1.136  |
| 96587_at   | 53.1    | 80.7    | 74.2    | 67.8    | 44.1    | 80.4    | 62.8    | 72.9    | 0.706292277 | 68.95     | 65.05    | 3.9      | 1.059953882 | 0.672   | -1.074 |
| 96588_at   | 9.6     | 25.4    | 15.1    | 8.3     | 5.7     | 21      | 15.5    | 11.7    | 0.831320615 | 14.6      | 13.475   | 1.125    | 1.083487941 | 0.8325  | -1.086 |
| 96589_at   | 6.9     | 5.5     | 8.3     | 19.7    | 33      | 16.3    | 10.9    | 10.9    | 0.267801845 | 10.1      | 17.775   | 7.675    | 0.568213783 | 0.1749  | 1.8    |
| 96590_f_at | 119.7   | 138.9   | 106.7   | 110     | 157.2   | 139.9   | 120.1   | 114.9   | 0.288323541 | 118.825   | 133.025  | 14.2     | 0.893253148 | 0.2795  | 1.117  |
| 96591_at   | 207.5   | 281.7   | 169.6   | 151     | 129.3   | 242.9   | 152.2   | 255     | 0.865231612 | 202.45    | 194.85   | 7.6      | 1.039004362 | 0.821   | -1.053 |
| 96592_at   | 185.6   | 140.8   | 118.8   | 226.6   | 135.8   | 215.8   | 129.4   | 311.8   | 0.565107759 | 167.95    | 198.2    | 30.25    | 0.847376387 | 0.6259  | 1.139  |
| 96593_at   | 140.2   | 159.1   | 200.9   | 179.7   | 169.3   | 155.6   | 126.2   | 179.3   | 0.505201258 | 169.975   | 157.6    | 12.375   | 1.078521574 | 0.5174  | -1.078 |
| 96594_at   | 1181.5  | 1758.9  | 1351.6  | 1257.7  | 2196.4  | 1361.5  | 1438.3  | 1293    | 0.487002992 | 1387.425  | 1572.3   | 184.875  | 0.882417478 | 0.4768  | 1.12   |
| 96595_at   | 58.2    | 51.5    | 59.8    | 66.3    | 66.5    | 47.1    | 50.6    | 42.1    | 0.281822912 | 58.95     | 51.575   | 7.375    | 1.142995637 | 0.2365  | -1.156 |
| 96596_at   | 652.9   | 768.9   | 708.1   | 712.1   | 486.6   | 667.6   | 680.6   | 695.7   | 0.220593123 | 710.5     | 632.625  | 77.875   | 1.123098202 | 0.2199  | -1.133 |
| 96597_at   | 52.9    | 40.2    | 66.9    | 45.1    | 45.7    | 67.2    | 61.7    | 69.9    | 0.262216787 | 51.275    | 61.125   | 9.85     | 0.838854806 | 0.2638  | 1.198  |
| 96598_at   | 139.6   | 241.7   | 160.7   | 207.7   | 267     | 225.6   | 238.8   | 220.6   | 0.112848517 | 187.425   | 238      | 50.575   | 0.7875      | 0.09514 | 1.296  |
| 96599_at   | 25.1    | 46.2    | 45.6    | 46.2    | 35.2    | 55.9    | 39.3    | 49.1    | 0.580883587 | 40.775    | 44.875   | 4.1      | 0.908635097 | 0.5694  | -1.117 |
| 96600_at   | 28.7    | 32.7    | 26      | 38      | 2       | 40.5    | 27.2    | 42.1    | 0.744469958 | 31.35     | 27.95    | 3.4      | 1.121645796 | 0.4638  | -1.771 |
| 96601_at   | 11      | 9.5     | 11.5    | 9.1     | 15.8    | 8.9     | 8.3     | 14.3    | 0.482001909 | 10.275    | 11.825   | 1.55     | 0.868921776 | 0.5572  | 1.113  |
| 96602_g_at | 111     | 97.7    | 115.8   | 105.3   | 122.1   | 98.8    | 82.2    | 126.5   | 0.99662316  | 107.45    | 107.4    | 0.05     | 1.000465549 | 0.9038  | -1.014 |
| 96603_at   | 266.8   | 312.3   | 363.7   | 537.6   | 277.4   | 482.3   | 410.8   | 545.9   | 0.50204101  | 370.1     | 429.1    | 59       | 0.862502913 | 0.4951  | 1.165  |
| 96604_at   | 343.3   | 433.9   | 364.2   | 287.5   | 437.4   | 362.9   | 545.5   | 405.3   | 0.156951269 | 357.225   | 437.775  | 80.55    | 0.816001371 | 0.1446  | 1.225  |
| 96605_at   | 903.8   | 737.1   | 752.2   | 757.6   | 1066.4  | 775     | 1162    | 941.5   | 0.09383134  | 787.675   | 986.225  | 198.55   | 0.798676773 | 0.07275 | 1.242  |
| 96606_at   | 340.4   | 307.5   | 424.4   | 410.9   | 268.9   | 347.7   | 252.3   | 283.1   | 0.058900219 | 370.8     | 288      | 82.8     | 1.2875      | 0.05118 | -1.286 |
| 96607_at   | 425.9   | 441.7   | 384.6   | 507.8   | 363.5   | 465.8   | 480.6   | 519.4   | 0.695007197 | 440       | 457.325  | 17.325   | 0.962116657 | 0.7284  | -1.036 |
| 96608_at   | 922.6   | 855.9   | 666.3   | 885.5   | 1042.6  | 1051.3  | 953.4   | 1165.2  | 0.023814911 | 832.575   | 1053.125 | 220.55   | 0.790575668 | 0.02886 | 1.271  |
| 96609_at   | 3127.5  | 2962    | 3187.4  | 2524.3  | 2883.6  | 3163.4  | 2680.7  | 2685.4  | 0.625605188 | 2950.3    | 2853.275 | 97.025   | 1.034004784 | 0.6472  | -1.032 |
| 96610_at   | 825.9   | 697.8   | 730.5   | 781.3   | 819.2   | 714.2   | 686.5   | 945.6   | 0.642640293 | 758.875   | 791.375  | 32.5     | 0.958932238 | 0.6749  | -1.037 |
| 96611_at   | 2977.1  | 2713.4  | 2579.1  | 2760.3  | 4253.5  | 2274.7  | 2708.4  | 2826.6  | 0.593492305 | 2757.475  | 3015.8   | 258.325  | 0.914342795 | 0.6576  | -1.065 |
| 96613_at   | 1662.1  | 1680.5  | 1846.9  | 1462.1  | 1665.7  | 1833.6  | 1765.8  | 1684.7  | 0.439774515 | 1662.9    | 1737.45  | 74.55    | 0.95709229  | 0.4125  | -1.048 |
| 96614_at   | 383.4   | 574.4   | 513.8   | 577.9   | 612     | 564.2   | 554.3   | 643.2   | 0.176730084 | 512.375   | 593.425  | 81.05    | 0.863419977 | 0.1731  | 1.171  |
| 96615_at   | 1357    | 1391.4  | 1405.4  | 1265.2  | 1325.3  | 1610.1  | 1253.3  | 1636.2  | 0.38407129  | 1354.75   | 1456.225 | 101.475  | 0.9303164   | 0.3911  | -1.068 |
| 96616_at   | 1284.6  | 702.5   | 902.7   | 959.8   | 616.6   | 943.3   | 737.3   | 785.1   | 0.227674944 | 962.4     | 770.575  | 191.825  | 1.248937482 | 0.2148  | -1.234 |
| 96617_at   | 436.3   | 828.9   | 701.5   | 821.2   | 842.8   | 755.9   | 805.4   | 647.8   | 0.547150452 | 696.975   | 762.975  | 66       | 0.91349651  | 0.4963  | -1.124 |
| 96618_at   | 659.8   | 569.3   | 600.7   | 484.7   | 649.4   | 485.2   | 608.2   | 542.2   | 0.890612623 | 578.625   | 571.25   | 7.375    | 1.012910284 | 0.8921  | -1.013 |
| 96619_at   | 265.9   | 200.6   | 230.1   | 273.7   | 271.9   | 237.7   | 216.2   | 246.1   | 0.985115455 | 242.575   | 242.975  | 0.4      | 0.99835374  | 0.9475  | -1.006 |
| 96620_at   | 315.6   | 278.9   | 291.7   | 248.7   | 285.6   | 215.9   | 232.7   | 301.2   | 0.359135128 | 283.725   | 258.85   | 24.875   | 1.096098126 | 0.3392  | -1.103 |
| 96621_at   | 809     | 968.4   | 807.9   | 738.6   | 1023.8  | 774.3   | 877.9   | 783.3   | 0.670796678 | 830.975   | 864.825  | 33.85    | 0.960859133 | 0.6717  | -1.039 |
| 96623_at   | 1117    | 1136.2  | 1033.1  | 1371.7  | 1453.5  | 1832.5  | 1726.6  | 1142.5  | 0.089010485 | 1164.5    | 1538.775 | 374.275  | 0.756770808 | 0.07007 | 1.307  |



|            |         |        |         |        |         |        |         |        |             |          |          |          |             |          |        |
|------------|---------|--------|---------|--------|---------|--------|---------|--------|-------------|----------|----------|----------|-------------|----------|--------|
| 96624_r_at | 208     | 116.2  | 237.9   | 118    | 295.9   | 158.5  | 126.9   | 67.1   | 0.895840676 | 170.025  | 162.1    | 7.925    | 1.048889574 | 0.7247   | -1.142 |
| 96625_at   | 539.2   | 395.1  | 455.3   | 490    | 356.2   | 444.9  | 381.6   | 461.7  | 0.18757611  | 469.9    | 411.1    | 58.8     | 1.143030893 | 0.1899   | -1.142 |
| 96626_at   | 1020.3  | 791.4  | 802.3   | 794.2  | 901.2   | 854.2  | 800.1   | 759.6  | 0.732381228 | 852.05   | 828.775  | 23.275   | 1.028083617 | 0.7538   | -1.024 |
| 96627_at   | 368     | 249.6  | 337.3   | 380.4  | 403.2   | 287.6  | 303.6   | 324.1  | 0.917991796 | 333.825  | 329.625  | 4.2      | 1.012741752 | 0.9495   | -1.008 |
| 96628_at   | 1006.5  | 780.6  | 900.6   | 918.1  | 755.3   | 889.5  | 816.1   | 878.7  | 0.285059873 | 901.45   | 834.9    | 66.55    | 1.079710145 | 0.2926   | -1.078 |
| 96629_at   | 1121.4  | 900.1  | 1122.3  | 1291   | 613.2   | 666.4  | 661.2   | 801.6  | 0.007144973 | 1108.7   | 685.6    | 423.1    | 1.617123687 | 0.002241 | -1.612 |
| 96630_at   | 9.4     | 4.6    | 4.6     | 4      | 9.1     | 6.3    | 8.6     | 5.6    | 0.299360144 | 5.65     | 7.4      | 1.75     | 0.763513514 | 0.2196   | 1.362  |
| 96632_at   | 10964.7 | 9404   | 10784.3 | 9031.6 | 11223.1 | 9210.4 | 10915.6 | 8650.3 | 0.95564381  | 10046.15 | 9999.85  | 46.3     | 1.004630069 | 0.9317   | -1.007 |
| 96633_s_at | 6435.9  | 4922.6 | 5281.4  | 5143.7 | 4684    | 5361.9 | 4940.9  | 4456.9 | 0.196415858 | 5445.9   | 4860.925 | 584.975  | 1.120342322 | 0.1717   | -1.117 |
| 96634_at   | 789     | 566.4  | 770.1   | 729.8  | 408.7   | 626.6  | 608.2   | 681.4  | 0.142182262 | 713.825  | 581.225  | 132.6    | 1.228138845 | 0.167    | -1.24  |
| 96635_at   | 546.9   | 570.7  | 357.1   | 445.8  | 436.1   | 508    | 580.3   | 573    | 0.489141323 | 480.125  | 524.35   | 44.225   | 0.915657481 | 0.4661   | 1.103  |
| 96636_at   | 1291.6  | 1312.4 | 1209.7  | 1057.3 | 1506.1  | 1397.9 | 1409.2  | 1038.2 | 0.357889761 | 1217.75  | 1337.85  | 120.1    | 0.910229099 | 0.3977   | -1.092 |
| 96637_at   | 334.3   | 417.2  | 358.5   | 338.2  | 353.3   | 327.8  | 361.6   | 378.9  | 0.774289679 | 362.05   | 355.4    | 6.65     | 1.018711311 | 0.7973   | -1.016 |
| 96638_at   | 16.6    | 23.3   | 43.6    | 12.5   | 8.2     | 10.9   | 5.8     | 12.7   | 0.122707733 | 24       | 9.4      | 14.6     | 2.553191489 | 0.03434  | -2.384 |
| 96639_at   | 2.2     | 2      | 1.7     | 0.9    | 2.1     | 3.4    | 3.4     | 4      | 0.024159239 | 1.7      | 3.225    | 1.525    | 0.527131783 | 0.03181  | 1.939  |
| 96640_at   | 414     | 355.2  | 363     | 357.5  | 355.8   | 395.8  | 369.9   | 401.9  | 0.651532926 | 372.425  | 380.85   | 8.425    | 0.97787843  | 0.6345   | -1.023 |
| 96641_at   | 1511.5  | 1224.9 | 1376    | 1063.4 | 1136.8  | 1450.7 | 1182.9  | 1289.9 | 0.817311062 | 1293.95  | 1265.075 | 28.875   | 1.022824734 | 0.8493   | -1.019 |
| 96643_at   | 86.8    | 105.8  | 102.8   | 45.3   | 146.4   | 80.8   | 100.2   | 63.6   | 0.599948806 | 85.175   | 97.75    | 12.575   | 0.871355499 | 0.6131   | 1.152  |
| 96644_at   | 24.7    | 35.7   | 33.1    | 17.5   | 37.5    | 33.6   | 36.6    | 25.2   | 0.321326401 | 27.75    | 33.225   | 5.475    | 0.835214447 | 0.3125   | 1.229  |
| 96646_at   | 338     | 272    | 287.9   | 332    | 218.1   | 254.7  | 265.5   | 190.9  | 0.019078318 | 307.475  | 232.3    | 75.175   | 1.323611709 | 0.02173  | -1.329 |
| 96647_at   | 1591.2  | 1497.9 | 1582.1  | 1677.9 | 1635.3  | 1706.8 | 1869.7  | 1610.3 | 0.146774205 | 1587.275 | 1705.525 | 118.25   | 0.93066651  | 0.1327   | -1.074 |
| 96648_at   | 243.7   | 232.1  | 197.1   | 229    | 243     | 231.7  | 230.7   | 192.2  | 0.944909043 | 225.475  | 224.4    | 1.075    | 1.004790553 | 0.939    | -1.006 |
| 96649_at   | 1368    | 1194   | 1225.4  | 1382.5 | 1258.5  | 1093.9 | 1368.4  | 1286   | 0.607474983 | 1292.475 | 1251.7   | 40.775   | 1.032575697 | 0.6017   | -1.034 |
| 96650_at   | 317.8   | 302.1  | 281.3   | 214.4  | 328.1   | 350.6  | 326.6   | 415.6  | 0.04862362  | 278.9    | 355.225  | 76.325   | 0.785136181 | 0.05478  | 1.281  |
| 96651_at   | 395.9   | 455.6  | 382.5   | 417.2  | 267.7   | 424.1  | 370.9   | 338.9  | 0.15558493  | 412.8    | 350.4    | 62.4     | 1.178082192 | 0.1428   | -1.192 |
| 96652_at   | 1545    | 1528.5 | 1324    | 1426.3 | 2019.4  | 1421.3 | 1475.5  | 1193.2 | 0.718030797 | 1455.95  | 1527.35  | 71.4     | 0.953252365 | 0.7953   | -1.032 |
| 96653_at   | 5982.4  | 6896.1 | 6369.5  | 6140.3 | 9166.8  | 6707.4 | 8456.6  | 7147.8 | 0.06986137  | 6347.075 | 7869.65  | 1522.575 | 0.806525703 | 0.03812  | 1.232  |
| 96654_at   | 226.9   | 214.9  | 239     | 259.3  | 167.6   | 269.2  | 195.3   | 221.8  | 0.411601147 | 235.025  | 213.475  | 21.55    | 1.100948589 | 0.3527   | -1.115 |
| 96655_g_at | 513     | 364    | 496.6   | 481.7  | 466.7   | 500.2  | 519     | 508.3  | 0.390726848 | 463.825  | 498.55   | 34.725   | 0.930348009 | 0.3668   | -1.084 |
| 96656_at   | 602.2   | 625.9  | 506.1   | 541.8  | 396.1   | 597.5  | 542.5   | 582.3  | 0.495595598 | 569      | 529.6    | 39.4     | 1.07439577  | 0.4763   | -1.084 |
| 96657_at   | 583.6   | 521.6  | 814     | 527.4  | 641.5   | 528.2  | 621.4   | 640.9  | 0.963076805 | 611.65   | 608      | 3.65     | 1.006003289 | 0.9461   | -1.008 |
| 96658_at   | 2269.6  | 1903.9 | 1918.2  | 1941.9 | 2081    | 1725.2 | 1547.9  | 1751.8 | 0.154808791 | 2008.4   | 1776.475 | 231.925  | 1.130553484 | 0.1407   | -1.134 |
| 96661_at   | 1590.3  | 1439.1 | 1576.3  | 1832.6 | 1523.2  | 1817.1 | 2228.7  | 1153.9 | 0.784064462 | 1609.575 | 1680.725 | 71.15    | 0.957667078 | 0.905    | -1.019 |
| 96662_at   | 2181.5  | 2868.8 | 2055.6  | 3078.3 | 2900.7  | 3268.4 | 3300.5  | 2947   | 0.1100022   | 2546.05  | 3104.15  | 558.1    | 0.820208431 | 0.09133  | 1.235  |
| 96663_at   | 267.5   | 224    | 326.7   | 276.6  | 275     | 339.2  | 289.9   | 251.7  | 0.606436696 | 273.7    | 288.95   | 15.25    | 0.947222703 | 0.5867   | -1.059 |
| 96664_at   | 770.1   | 1039.7 | 839.6   | 814.5  | 813.7   | 915.8  | 988.7   | 1017.7 | 0.401937569 | 865.975  | 933.975  | 68       | 0.927192912 | 0.3778   | -1.082 |
| 96665_at   | 1920.1  | 1782.4 | 1863    | 1591   | 1421.8  | 1868.2 | 1532    | 1382.4 | 0.128658508 | 1789.125 | 1551.1   | 238.025  | 1.153455612 | 0.113    | -1.159 |
| 96666_at   | 463     | 391.5  | 359.7   | 434.3  | 301.6   | 443.9  | 302.2   | 364.6  | 0.203522911 | 412.125  | 353.075  | 59.05    | 1.16724492  | 0.1806   | -1.177 |
| 96667_at   | 1091.6  | 899.8  | 919.5   | 867.9  | 721.5   | 857.5  | 907     | 932.6  | 0.238219587 | 944.7    | 854.65   | 90.05    | 1.105364769 | 0.2366   | -1.106 |
| 96668_at   | 2312.7  | 2485.3 | 2009.3  | 2180.1 | 2139.1  | 2059.8 | 1982.3  | 2286.8 | 0.327489791 | 2246.85  | 2117     | 129.85   | 1.061336797 | 0.328    | -1.06  |
| 96669_at   | 963.9   | 926.9  | 1100.7  | 1094.2 | 740.8   | 1115.2 | 1032.8  | 1038.4 | 0.691560956 | 1021.425 | 981.8    | 39.625   | 1.040359544 | 0.6492   | -1.05  |
| 96670_at   | 568.4   | 333.2  | 440.4   | 392.9  | 231.7   | 513.8  | 312.3   | 236.3  | 0.235094194 | 433.725  | 323.525  | 110.2    | 1.340622827 | 0.1798   | -1.39  |
| 96672_at   | 150.2   | 151.8  | 174.8   | 174.7  | 208.7   | 176.7  | 194.7   | 189.3  | 0.021442935 | 162.875  | 192.35   | 29.475   | 0.846763712 | 0.02206  | 1.182  |
| 96674_at   | 1572.4  | 1354.2 | 1524.2  | 1263   | 1590.2  | 1367.2 | 1444.5  | 1438.5 | 0.727959028 | 1428.45  | 1460.1   | 31.65    | 0.978323403 | 0.6997   | -1.025 |
| 96675_at   | 3012.8  | 2560.7 | 2684    | 2499.5 | 2112    | 2813.7 | 2178.5  | 2718.3 | 0.323991146 | 2689.25  | 2455.625 | 233.625  | 1.095138712 | 0.2988   | -1.101 |
| 96676_at   | 1108.2  | 991.3  | 993.1   | 828.3  | 1249.7  | 825.6  | 1040.5  | 986.3  | 0.682878942 | 980.225  | 1025.525 | 45.3     | 0.955827503 | 0.7176   | -1.04  |
| 96677_at   | 287.9   | 412.8  | 337.4   | 454.1  | 406.9   | 355.3  | 353.3   | 489.4  | 0.58712218  | 373.05   | 401.225  | 28.175   | 0.929777556 | 0.5579   | -1.082 |
| 96678_at   | 588.4   | 591.3  | 545.6   | 413.4  | 464.2   | 607.8  | 510.1   | 567.3  | 0.96101769  | 534.675  | 537.35   | 2.675    | 0.995021867 | 0.9265   | -1.01  |
| 96679_at   | 219.4   | 147.8  | 203.5   | 151.5  | 106.4   | 222.1  | 110.3   | 72.3   | 0.21975739  | 180.55   | 127.775  | 52.775   | 1.413030718 | 0.1523   | -1.518 |
| 96680_at   | 596.7   | 412.7  | 556.2   | 471.2  | 536.1   | 524.5  | 415.7   | 461    | 0.639759234 | 509.2    | 484.325  | 24.875   | 1.05136014  | 0.6741   | -1.046 |
| 96682_at   | 154.2   | 155.6  | 173.2   | 153.8  | 245.8   | 146.3  | 136.6   | 158.7  | 0.651781075 | 159.2    | 171.85   | 12.65    | 0.926389293 | 0.7255   | -1.051 |
| 96684_at   | 758.5   | 849.7  | 825.8   | 744.7  | 594.3   | 818.5  | 753.1   | 748.2  | 0.279114196 | 794.675  | 728.525  | 66.15    | 1.090799904 | 0.2694   | -1.097 |
| 96685_at   | 57.3    | 64.6   | 38.3    | 49.6   | 111     | 49.6   | 80.5    | 72     | 0.13434968  | 52.45    | 78.275   | 25.825   | 0.670073459 | 0.1082   | 1.46   |
| 96686_i_at | 3323.7  | 3469.4 | 3215.9  | 2970.3 | 5575.6  | 3008.9 | 3581    | 2787.3 | 0.496421907 | 3244.825 | 3738.2   | 493.375  | 0.86801803  | 0.5337   | -1.11  |
| 96687_f_at | 2545.5  | 2174.2 | 1670.8  | 2012.3 | 3109.1  | 1763.5 | 2585.7  | 2063.9 | 0.457479376 | 2100.7   | 2380.55  | 279.85   | 0.882443133 | 0.4854   | 1.12   |
| 96688_at   | 193.6   | 221.7  | 136.6   | 202.7  | 193.2   | 239.4  | 185.9   | 187.6  | 0.587088156 | 188.65   | 201.525  | 12.875   | 0.936112145 | 0.5539   | -1.079 |



|            |         |         |         |         |         |        |         |         |             |           |           |         |             |          |        |
|------------|---------|---------|---------|---------|---------|--------|---------|---------|-------------|-----------|-----------|---------|-------------|----------|--------|
| 96691_at   | 1023.4  | 992.5   | 1078.9  | 1018.5  | 998.7   | 904.1  | 1092.1  | 1118.5  | 0.999640588 | 1028.325  | 1028.35   | 0.025   | 0.999975689 | 0.9554   | -1.003 |
| 96692_at   | 282.1   | 247.1   | 244.6   | 263.1   | 235     | 263.7  | 246.9   | 241.6   | 0.290613459 | 259.225   | 246.8     | 12.425  | 1.050344408 | 0.2828   | -1.05  |
| 96693_at   | 2133.6  | 1271.4  | 1589.3  | 1510.3  | 1250.8  | 1617.5 | 1515    | 1668.9  | 0.606841533 | 1626.15   | 1513.05   | 113.1   | 1.074749678 | 0.6479   | -1.062 |
| 96694_at   | 24.2    | 40.7    | 59.2    | 33      | 61.8    | 44.4   | 17.2    | 25.4    | 0.873600613 | 39.275    | 37.2      | 2.075   | 1.05577957  | 0.7391   | -1.126 |
| 96695_at   | 390     | 371.8   | 351.3   | 347.3   | 321.2   | 358.3  | 343.8   | 341.2   | 0.106377351 | 365.1     | 341.125   | 23.975  | 1.070282155 | 0.1021   | -1.07  |
| 96696_at   | 4511.8  | 4233.9  | 4390.7  | 4030.4  | 4616.1  | 4457.5 | 4644.1  | 3244.7  | 0.891869361 | 4291.7    | 4240.6    | 51.1    | 1.012050182 | 0.8172   | -1.022 |
| 96698_at   | 2243.3  | 1720    | 1832.6  | 1567.5  | 1485.6  | 1711.3 | 1530    | 2217.9  | 0.653799816 | 1840.85   | 1736.2    | 104.65  | 1.060275314 | 0.6163   | -1.065 |
| 96699_at   | 12529.1 | 13233.5 | 14032.4 | 12471.9 | 15253.5 | 11767  | 14348.3 | 12951.7 | 0.576436953 | 13066.725 | 13580.125 | 513.4   | 0.962194752 | 0.6033   | -1.035 |
| 96700_r_at | 167.8   | 85.3    | 66.2    | 97.6    | 107.3   | 109    | 90.7    | 115     | 0.95851574  | 104.225   | 105.5     | 1.275   | 0.987914692 | 0.7451   | -1.071 |
| 96701_at   | 4459.7  | 3762.7  | 3987.5  | 3653.4  | 3017.5  | 3620.3 | 2753.5  | 3589.4  | 0.042992012 | 3965.825  | 3245.175  | 720.65  | 1.222068147 | 0.04394  | -1.227 |
| 96703_at   | 10330.7 | 9541.3  | 11238.2 | 8252.1  | 11509.8 | 8869.6 | 11129.8 | 8070    | 0.960749722 | 9840.575  | 9894.8    | 54.225  | 0.994519849 | 0.9948   | -1.001 |
| 96704_at   | 287.7   | 202.7   | 364.1   | 241.6   | 155.4   | 87     | 47.1    | 113.6   | 0.008052046 | 274.025   | 100.775   | 173.25  | 2.719176383 | 0.009302 | -2.903 |
| 96707_at   | 2096.8  | 1628.5  | 1642.7  | 1611.6  | 1716    | 1813.5 | 1767    | 1749.5  | 0.89761433  | 1744.9    | 1761.5    | 16.6    | 0.990576213 | 0.8176   | -1.016 |
| 96708_at   | 2093.7  | 2149.6  | 2083.3  | 1758.4  | 2780.2  | 2516.1 | 2435.6  | 2169.8  | 0.029013754 | 2021.25   | 2475.425  | 454.175 | 0.816526455 | 0.02598  | 1.224  |
| 96709_at   | 1344.3  | 1216.7  | 1316    | 1139.7  | 1359.5  | 1378.8 | 1315    | 1335.1  | 0.140201071 | 1254.175  | 1347.1    | 92.925  | 0.931018484 | 0.1103   | -1.076 |
| 96710_at   | 4105.2  | 6127.3  | 4330.8  | 4408.6  | 7165    | 4798.8 | 5095.7  | 4552    | 0.419304324 | 4742.975  | 5402.875  | 659.9   | 0.877861324 | 0.39     | 1.135  |
| 96711_at   | 1564.8  | 1203.2  | 1165.6  | 1224.9  | 1199.4  | 1081.8 | 1082.8  | 1282    | 0.280225239 | 1289.625  | 1161.5    | 128.125 | 1.110309944 | 0.254    | -1.105 |
| 96712_at   | 615.1   | 1026.2  | 856.9   | 1160.9  | 1027.6  | 1274.5 | 1561.3  | 1295.7  | 0.058295467 | 914.775   | 1289.775  | 375     | 0.709251614 | 0.06866  | 1.433  |
| 96713_at   | 206.6   | 123.1   | 141.7   | 151.2   | 74.1    | 192    | 189     | 167.9   | 0.997699451 | 155.65    | 155.75    | 0.1     | 0.999357945 | 0.8585   | -1.048 |
| 96716_at   | 1354.9  | 1151    | 1284.4  | 1172.2  | 987.9   | 1289.1 | 1175.1  | 1329    | 0.636538543 | 1240.625  | 1195.275  | 45.35   | 1.03794106  | 0.6092   | -1.042 |
| 96717_at   | 1085.3  | 895.4   | 1018.8  | 923     | 951.2   | 877.4  | 952.7   | 1092.6  | 0.852856479 | 980.625   | 968.475   | 12.15   | 1.012545497 | 0.8489   | -1.013 |
| 96718_at   | 1053.2  | 1442.8  | 1295.4  | 1267.3  | 1296.3  | 1214.9 | 1189.1  | 1529.4  | 0.714807118 | 1264.675  | 1307.425  | 42.75   | 0.96730214  | 0.7044   | -1.035 |
| 96719_i_at | 770.4   | 683.5   | 915.4   | 952.6   | 1194.6  | 923.5  | 1048.3  | 891.6   | 0.096240533 | 830.475   | 1014.5    | 184.025 | 0.818605224 | 0.09446  | 1.224  |
| 96720_f_at | 3.4     | 19      | 33      | 22.6    | 4.1     | 6.9    | 21.9    | 6       | 0.240038761 | 19.5      | 9.725     | 9.775   | 2.005141388 | 0.3409   | -1.898 |
| 96722_at   | 14.7    | 24.2    | 18.9    | 16.6    | 15.7    | 11.2   | 14.5    | 13.6    | 0.095137945 | 18.6      | 13.75     | 4.85    | 1.352727273 | 0.06241  | -1.342 |
| 96723_f_at | 647.9   | 623     | 641.1   | 651.3   | 580.1   | 700.4  | 679.9   | 829.8   | 0.350650203 | 640.825   | 697.55    | 56.725  | 0.918679665 | 0.339    | -1.08  |
| 96724_r_at | 229.8   | 381.9   | 227.2   | 301.1   | 191.6   | 315.8  | 266.2   | 237.6   | 0.502746049 | 285       | 252.8     | 32.2    | 1.127373418 | 0.5135   | -1.119 |
| 96725_at   | 332.6   | 678.4   | 546.6   | 576.3   | 575.1   | 548.6  | 642.3   | 716.5   | 0.340499986 | 533.475   | 620.625   | 87.15   | 0.859577039 | 0.3203   | 1.196  |
| 96726_at   | 1101.7  | 1048.2  | 1065.4  | 1276.9  | 826.9   | 1172.2 | 1095    | 1147.3  | 0.538310685 | 1123.05   | 1060.35   | 62.7    | 1.059131419 | 0.5175   | -1.066 |
| 96728_at   | 358.3   | 305.7   | 413.2   | 416.4   | 314.1   | 423.6  | 480.9   | 508.4   | 0.299406803 | 373.4     | 431.75    | 58.35   | 0.864852345 | 0.3335   | 1.146  |
| 96729_at   | 12.4    | 20.1    | 23.4    | 27.9    | 11.4    | 40.1   | 9.5     | 11.9    | 0.750134006 | 20.95     | 18.225    | 2.725   | 1.14951989  | 0.4729   | -1.33  |
| 96730_at   | 293.6   | 180.3   | 192.9   | 175     | 127.5   | 250.5  | 197     | 192.9   | 0.641111507 | 210.45    | 191.975   | 18.475  | 1.096236489 | 0.619    | -1.102 |
| 96731_at   | 932.9   | 963     | 843.2   | 962     | 850.9   | 1109.5 | 896.2   | 960.1   | 0.668519513 | 925.275   | 954.175   | 28.9    | 0.969712055 | 0.6934   | -1.027 |
| 96732_at   | 605.1   | 743.2   | 671.1   | 838.5   | 415.9   | 589.2  | 627.5   | 816.3   | 0.336746182 | 714.475   | 612.225   | 102.25  | 1.167013761 | 0.3023   | -1.192 |
| 96733_at   | 725.1   | 912.7   | 830.9   | 766.3   | 501.4   | 755.8  | 794     | 815.3   | 0.322926425 | 808.75    | 716.625   | 92.125  | 1.128553986 | 0.3192   | -1.145 |
| 96734_at   | 967.9   | 766.8   | 850.7   | 989.4   | 659.4   | 725.4  | 786.5   | 830.5   | 0.071363447 | 893.7     | 750.45    | 143.25  | 1.190885469 | 0.06788  | -1.189 |
| 96735_at   | 219.1   | 335.3   | 287.8   | 328.8   | 332.5   | 314.5  | 270.7   | 318.5   | 0.611575369 | 292.75    | 309.05    | 16.3    | 0.947257725 | 0.5687   | -1.067 |
| 96736_at   | 1323.2  | 1477.8  | 1491.3  | 1524.9  | 1691.1  | 1494.8 | 1530.2  | 1681.6  | 0.076444186 | 1454.3    | 1599.425  | 145.125 | 0.909264267 | 0.07858  | -1.1   |
| 96737_at   | 380.8   | 334.5   | 356.3   | 314.5   | 470.6   | 413.3  | 469.2   | 465.5   | 0.001601766 | 346.525   | 454.65    | 108.125 | 0.762179699 | 0.001876 | 1.313  |
| 96738_at   | 470     | 399.4   | 433.8   | 530.2   | 320.1   | 528    | 436.6   | 396.5   | 0.492524354 | 458.35    | 420.3     | 38.05   | 1.090530573 | 0.4495   | -1.102 |
| 96739_at   | 58.8    | 92.7    | 97.7    | 80.5    | 146.9   | 83.8   | 96.1    | 115.4   | 0.143443355 | 82.425    | 110.55    | 28.125  | 0.745590231 | 0.1327   | 1.336  |
| 96741_at   | 160.9   | 248.9   | 187.2   | 245.9   | 126.1   | 235.8  | 211.1   | 293.9   | 0.889653551 | 210.725   | 216.725   | 6       | 0.972315146 | 0.9995   | -1     |
| 96742_at   | 663.2   | 564.7   | 692     | 838.3   | 530.3   | 1105.9 | 720.9   | 361.9   | 0.956869546 | 689.55    | 679.75    | 9.8     | 1.014417065 | 0.7379   | -1.092 |
| 96743_at   | 3212.2  | 2148.5  | 2298.3  | 2544.7  | 2300.9  | 2332.2 | 2309.1  | 1853.4  | 0.244436848 | 2550.925  | 2198.9    | 352.025 | 1.160091409 | 0.2242   | -1.151 |
| 96744_at   | 548.2   | 567.1   | 599.4   | 462.8   | 730.1   | 503.6  | 564.2   | 556.8   | 0.473389352 | 544.375   | 588.675   | 44.3    | 0.924746252 | 0.479    | -1.076 |
| 96745_at   | 88.5    | 81.4    | 85.7    | 62.5    | 115.6   | 73.1   | 94.6    | 105.9   | 0.161168668 | 79.525    | 97.3      | 17.775  | 0.817317575 | 0.1739   | 1.217  |
| 96746_at   | 289.9   | 267.6   | 247.4   | 318.6   | 266.4   | 214.2  | 293.1   | 295.3   | 0.595784369 | 280.875   | 267.25    | 13.625  | 1.050982226 | 0.5844   | -1.055 |
| 96747_at   | 593.7   | 745.1   | 555     | 790.2   | 532.7   | 719.9  | 892.1   | 1305.2  | 0.338399758 | 671       | 862.475   | 191.475 | 0.777993565 | 0.353    | 1.232  |
| 96748_i_at | 35.1    | 43.6    | 34.9    | 47.1    | 29.7    | 47.9   | 41.6    | 45.6    | 0.847290406 | 40.175    | 41.2      | 1.025   | 0.975121359 | 0.897    | -1.018 |
| 96749_f_at | 11      | 6       | 5.1     | 5.6     | 1.6     | 6.5    | 0.6     | 7.7     | 0.255186203 | 6.925     | 4.1       | 2.825   | 1.68902439  | 0.1955   | -2.449 |
| 96750_at   | 984.5   | 1188.3  | 1081.4  | 1075.9  | 933     | 1155.1 | 1162.8  | 1117.4  | 0.893452809 | 1082.525  | 1092.075  | 9.55    | 0.991255179 | 0.9163   | -1.007 |
| 96751_at   | 1439.3  | 1469.8  | 1491.2  | 1445.7  | 1234.5  | 1573   | 1443.9  | 1441.6  | 0.62563584  | 1461.5    | 1423.25   | 38.25   | 1.02687511  | 0.5764   | -1.031 |
| 96752_at   | 72.4    | 45.6    | 44.7    | 53.6    | 74.2    | 98.7   | 79.7    | 78.7    | 0.014805886 | 54.075    | 82.825    | 28.75   | 0.652882584 | 0.01378  | 1.553  |
| 96753_at   | 617.7   | 1406.3  | 789.4   | 820.5   | 1391.3  | 868.8  | 1007.1  | 1113.7  | 0.401836951 | 908.475   | 1095.225  | 186.75  | 0.829487092 | 0.3129   | 1.246  |
| 96754_s_at | 1693.7  | 1849.7  | 1715.7  | 1902.6  | 1417.2  | 1699.2 | 1525.6  | 1448    | 0.01743029  | 1790.425  | 1522.5    | 267.925 | 1.175977011 | 0.01634  | -1.178 |
| 96755_at   | 2191.5  | 2004.9  | 1534.2  | 1653.5  | 1109.1  | 1804.4 | 1147.4  | 1625.6  | 0.116527806 | 1846.025  | 1421.625  | 424.4   | 1.29853161  | 0.1139   | -1.315 |



|            |        |        |        |        |        |        |        |        |             |          |          |         |             |         |        |
|------------|--------|--------|--------|--------|--------|--------|--------|--------|-------------|----------|----------|---------|-------------|---------|--------|
| 96756_at   | 195.8  | 164.6  | 175.7  | 172.3  | 139.7  | 162.1  | 186.4  | 224.2  | 0.961225608 | 177.1    | 178.1    | 1       | 0.994385177 | 0.9458  | -1.008 |
| 96757_at   | 980.4  | 1212.5 | 1088.5 | 1101.6 | 1385.9 | 1216.5 | 1108.7 | 1208.5 | 0.123797801 | 1095.75  | 1229.9   | 134.15  | 0.890926092 | 0.1189  | 1.122  |
| 96758_s_at | 60.9   | 52.4   | 66.6   | 66.9   | 68     | 57.1   | 64     | 51.9   | 0.778711851 | 61.7     | 60.25    | 1.45    | 1.02406639  | 0.7797  | -1.025 |
| 96759_r_at | 36     | 30.9   | 68.8   | 49.3   | 133.5  | 88.9   | 111.7  | 26.9   | 0.150778278 | 46.25    | 90.25    | 44      | 0.512465374 | 0.2129  | 1.753  |
| 96760_at   | 268.5  | 185.1  | 210.5  | 206.8  | 267.3  | 230.7  | 243.4  | 179.9  | 0.640732192 | 217.725  | 230.325  | 12.6    | 0.945294692 | 0.6488  | -1.057 |
| 96761_at   | 394.3  | 366.4  | 434.1  | 454.5  | 385.2  | 380    | 420.4  | 529.4  | 0.698887257 | 412.325  | 428.75   | 16.425  | 0.961690962 | 0.7249  | -1.034 |
| 96762_at   | 2996.9 | 2170.8 | 2573.2 | 2750.1 | 1943.5 | 2690.6 | 2459.1 | 2457.8 | 0.356022747 | 2622.75  | 2387.75  | 235     | 1.098419014 | 0.3722  | -1.099 |
| 96763_at   | 224.8  | 242.2  | 191.9  | 245.6  | 224.3  | 255.3  | 203.9  | 332.8  | 0.414969777 | 226.125  | 254.075  | 27.95   | 0.889993112 | 0.4218  | -1.109 |
| 96764_at   | 137.2  | 78     | 92.5   | 90.1   | 76.7   | 76.5   | 84.5   | 116.7  | 0.527900589 | 99.45    | 88.6     | 10.85   | 1.122460497 | 0.5155  | -1.114 |
| 96765_at   | 5629.8 | 5510.3 | 4862.2 | 5221.1 | 6507.5 | 5703.6 | 6201.4 | 6087.2 | 0.013886783 | 5305.85  | 6124.925 | 819.075 | 0.866271832 | 0.01479 | 1.155  |
| 96766_s_at | 1932.3 | 3208.8 | 2579.6 | 2652.4 | 2238.9 | 2465.1 | 2332.4 | 1823.7 | 0.262081077 | 2593.275 | 2215.025 | 378.25  | 1.170765567 | 0.2764  | -1.159 |
| 96767_at   | 903.3  | 1136.7 | 1051   | 982.3  | 1201.7 | 1173   | 1181.8 | 972.5  | 0.170255995 | 1018.325 | 1132.25  | 113.925 | 0.899381762 | 0.1793  | 1.112  |
| 96768_at   | 174.1  | 287.4  | 365.7  | 144.2  | 273.7  | 326.3  | 339.7  | 178.9  | 0.582134604 | 242.85   | 279.65   | 36.8    | 0.868406937 | 0.5155  | 1.198  |
| 96770_at   | 4.2    | 7.9    | 11.6   | 7.5    | 5.9    | 5.5    | 5.7    | 5.8    | 0.264090205 | 7.8      | 5.725    | 2.075   | 1.362445415 | 0.2792  | -1.282 |
| 96771_at   | 131.2  | 179.3  | 153.9  | 135.1  | 110.5  | 219.5  | 203.2  | 170    | 0.380377161 | 149.875  | 175.8    | 25.925  | 0.852531286 | 0.4569  | 1.144  |
| 96772_at   | 577.5  | 449.2  | 521    | 473    | 435.2  | 498.3  | 449.2  | 453.4  | 0.211326919 | 505.175  | 459.025  | 46.15   | 1.100539186 | 0.1901  | -1.097 |
| 96773_at   | 1068.6 | 868.7  | 911.4  | 1064.5 | 828.7  | 957.4  | 940.1  | 799    | 0.190117047 | 978.3    | 881.3    | 97      | 1.110064677 | 0.1893  | -1.109 |
| 96774_at   | 985.8  | 1037.1 | 1002.2 | 1126.3 | 1259   | 1192.2 | 1199.5 | 1075.7 | 0.028494082 | 1037.85  | 1181.6   | 143.75  | 0.878342925 | 0.02687 | 1.138  |
| 96775_at   | 396.1  | 317.1  | 392.2  | 360.5  | 274.9  | 377.1  | 262.9  | 398.4  | 0.379276518 | 366.475  | 328.325  | 38.15   | 1.116195843 | 0.3388  | -1.131 |
| 96777_at   | 1146.6 | 860.8  | 964.1  | 1028.2 | 836    | 1046.4 | 829.3  | 892.9  | 0.255085972 | 999.925  | 901.15   | 98.775  | 1.109609943 | 0.2483  | -1.109 |
| 96778_at   | 337.5  | 680.9  | 551    | 579.8  | 469.5  | 598    | 561.5  | 579.2  | 0.85872451  | 537.3    | 552.05   | 14.75   | 0.973281406 | 0.7458  | -1.056 |
| 96779_f_at | 584.1  | 698.8  | 786.6  | 696.8  | 800.1  | 748.4  | 719.9  | 872    | 0.131849621 | 691.575  | 785.1    | 93.525  | 0.880875048 | 0.1317  | 1.138  |
| 96780_at   | 222.7  | 279.7  | 232.2  | 237.1  | 259.8  | 264.8  | 241.2  | 325.1  | 0.232405411 | 242.925  | 272.725  | 29.8    | 0.890732423 | 0.2127  | 1.12   |
| 96781_at   | 544.3  | 443.8  | 488    | 480    | 481.7  | 459.7  | 497.7  | 590.7  | 0.624439232 | 489.025  | 507.45   | 18.425  | 0.963691004 | 0.6295  | -1.036 |
| 96782_at   | 350.5  | 267.9  | 512.8  | 565.8  | 395.9  | 429.6  | 323.8  | 522.7  | 0.941363917 | 424.25   | 418      | 6.25    | 1.014952153 | 0.9472  | -1.014 |
| 96783_at   | 54     | 70.9   | 46     | 56.3   | 78.4   | 63.2   | 83.9   | 85.7   | 0.027955241 | 56.8     | 77.8     | 21      | 0.730077121 | 0.03013 | 1.377  |
| 96784_at   | 1868.3 | 1288.8 | 1693.5 | 1443.6 | 950.4  | 1189.2 | 1180.9 | 840    | 0.017134646 | 1573.55  | 1040.125 | 533.425 | 1.512847014 | 0.01294 | -1.514 |
| 96785_at   | 534.5  | 836.3  | 775.5  | 625.4  | 892.2  | 948.2  | 1043.8 | 773.5  | 0.048963589 | 692.925  | 914.425  | 221.5   | 0.757771277 | 0.05368 | 1.332  |
| 96786_s_at | 54.7   | 71.9   | 52.6   | 14.8   | 147.2  | 112.6  | 138.7  | 73.5   | 0.016792472 | 48.5     | 118      | 69.5    | 0.411016949 | 0.04088 | 2.723  |
| 96787_at   | 33.6   | 70.1   | 66     | 56.9   | 59.2   | 90.5   | 53.4   | 29     | 0.93068487  | 56.65    | 58.025   | 1.375   | 0.976303318 | 0.957   | -1.016 |
| 96789_i_at | 141.2  | 121.7  | 126.4  | 102.8  | 67.4   | 142.8  | 83.5   | 94.9   | 0.219615223 | 123.025  | 97.15    | 25.875  | 1.26634071  | 0.1681  | -1.308 |
| 96790_f_at | 133.9  | 132.5  | 184.3  | 186.5  | 166.2  | 211    | 170.6  | 171.5  | 0.311062325 | 159.3    | 179.825  | 20.525  | 0.885861254 | 0.2836  | 1.139  |
| 96791_at   | 435.5  | 758.2  | 442.8  | 502.8  | 606.2  | 651.4  | 593.4  | 807.4  | 0.209537889 | 534.825  | 664.6    | 129.775 | 0.80473217  | 0.1596  | 1.266  |
| 96792_at   | 16.1   | 25.9   | 36.2   | 42.8   | 47.3   | 25.1   | 30.8   | 37.2   | 0.545266807 | 30.25    | 35.1     | 4.85    | 0.861823362 | 0.4925  | 1.205  |
| 96793_at   | 602    | 520.2  | 549.2  | 424.8  | 563.2  | 535    | 474.3  | 322    | 0.473590588 | 524.05   | 473.625  | 50.425  | 1.106466086 | 0.4599  | -1.122 |
| 96794_at   | 277.6  | 390.5  | 392.5  | 414    | 301.9  | 361.3  | 395.9  | 447.2  | 0.861005658 | 368.65   | 376.575  | 7.925   | 0.978955055 | 0.8592  | -1.023 |
| 96795_at   | 93.5   | 52.6   | 95.7   | 84.7   | 96.7   | 110.7  | 111    | 150.9  | 0.060046715 | 81.625   | 117.325  | 35.7    | 0.695717025 | 0.0677  | 1.455  |
| 96796_f_at | 20.3   | 26.4   | 9.5    | 31.9   | 10.2   | 15.3   | 16.4   | 22.6   | 0.331546689 | 22.025   | 16.125   | 5.9     | 1.365891473 | 0.4448  | -1.292 |
| 96797_s_at | 552.2  | 675.7  | 545.1  | 585.8  | 537.8  | 677.7  | 650.4  | 464.2  | 0.906553507 | 589.7    | 582.525  | 7.175   | 1.012317068 | 0.8494  | -1.02  |
| 96798_r_at | 1.2    | 9.2    | 1      | 1.1    | 4.3    | 2.4    | 2.3    | 2.3    | 0.893779954 | 3.125    | 2.825    | 0.3     | 1.10619469  | 0.5224  | 1.455  |
| 96799_at   | 373    | 435.9  | 373.8  | 400.8  | 277.6  | 375    | 383.7  | 285    | 0.102078224 | 395.875  | 330.325  | 65.55   | 1.198440929 | 0.08977 | -1.21  |
| 96801_at   | 109.2  | 55.6   | 98.5   | 26.8   | 145.6  | 120.8  | 167.5  | 131.8  | 0.027899132 | 72.525   | 141.425  | 68.9    | 0.51281598  | 0.0524  | 2.219  |
| 96802_at   | 411.6  | 379.6  | 413.2  | 481.7  | 337.1  | 413.7  | 423.4  | 467.9  | 0.762186421 | 421.525  | 410.525  | 11      | 1.026794958 | 0.7392  | -1.03  |
| 96803_at   | 136.9  | 79.8   | 89.7   | 84.5   | 83     | 114.5  | 60.5   | 87.8   | 0.538205726 | 97.725   | 86.45    | 11.275  | 1.130422209 | 0.5158  | -1.132 |
| 96804_at   | 628.6  | 640.7  | 468.4  | 562.1  | 662.5  | 523.8  | 558.5  | 564    | 0.965308988 | 574.95   | 577.2    | 2.25    | 0.996101871 | 0.934   | -1.008 |
| 96806_at   | 457    | 528.2  | 628.6  | 554.4  | 495    | 571.9  | 560.4  | 485.2  | 0.752452154 | 542.05   | 528.125  | 13.925  | 1.026366864 | 0.7856  | -1.022 |
| 96807_at   | 43.5   | 23.3   | 57.9   | 41.9   | 51.9   | 46.7   | 24     | 62.3   | 0.685741505 | 41.65    | 46.225   | 4.575   | 0.901027582 | 0.7421  | -1.102 |
| 96808_at   | 51.8   | 17.7   | 80.1   | 22     | 32.2   | 52     | 92     | 34     | 0.648245292 | 42.9     | 52.55    | 9.65    | 0.816365366 | 0.5201  | 1.342  |
| 96810_at   | 363.9  | 315.4  | 399.7  | 296.8  | 364.9  | 483.7  | 456.4  | 494.4  | 0.032098999 | 343.95   | 449.85   | 105.9   | 0.764588196 | 0.03259 | 1.308  |
| 96811_at   | 1267   | 1274.8 | 1408.2 | 1358.3 | 558.5  | 962    | 944.6  | 1026.7 | 0.018716718 | 1327.075 | 872.95   | 454.125 | 1.520218798 | 0.02098 | -1.561 |
| 96812_at   | 483.8  | 730.9  | 604    | 555.2  | 460    | 731.7  | 550.4  | 630.4  | 0.996557879 | 593.475  | 593.125  | 0.35    | 1.000590095 | 0.9778  | -1.004 |
| 96813_f_at | 705.6  | 1072.7 | 714.7  | 881.6  | 883.3  | 929    | 899.5  | 946.8  | 0.47406274  | 843.65   | 914.65   | 71      | 0.922374679 | 0.3786  | -1.1   |
| 96814_r_at | 105.5  | 156.9  | 135.6  | 178.4  | 154.1  | 114.8  | 158.3  | 138.1  | 0.886005215 | 144.1    | 141.325  | 2.775   | 1.019635592 | 0.9509  | -1.009 |
| 96817_at   | 168.9  | 252.5  | 228.5  | 294.4  | 292.3  | 231.2  | 259.3  | 241.9  | 0.528271284 | 236.075  | 256.175  | 20.1    | 0.921538011 | 0.4734  | 1.103  |
| 96818_at   | 317.3  | 511.5  | 452.6  | 524.4  | 509.1  | 548.3  | 491    | 470.4  | 0.352521614 | 451.45   | 504.7    | 53.25   | 0.894491777 | 0.3256  | 1.137  |
| 96819_at   | 366.9  | 367.5  | 305.9  | 365.8  | 394.3  | 317.6  | 340.5  | 381    | 0.780440095 | 351.525  | 358.35   | 6.825   | 0.980954374 | 0.7931  | -1.019 |



|            |         |         |         |         |        |         |        |        |             |           |          |         |             |          |        |
|------------|---------|---------|---------|---------|--------|---------|--------|--------|-------------|-----------|----------|---------|-------------|----------|--------|
| 96822_at   | 800.9   | 906.6   | 778.1   | 765     | 872.4  | 892.1   | 843.5  | 784.7  | 0.409426197 | 812.65    | 848.175  | 35.525  | 0.958115955 | 0.3919   | -1.045 |
| 96824_at   | 142.8   | 99.5    | 184.7   | 159.3   | 183.4  | 154.5   | 169.3  | 168    | 0.309586628 | 146.575   | 168.8    | 22.225  | 0.868335308 | 0.2754   | 1.178  |
| 96825_at   | 93.4    | 258.5   | 217.9   | 199.3   | 168    | 245.3   | 113.6  | 304.1  | 0.787322895 | 192.275   | 207.75   | 15.475  | 0.925511432 | 0.8154   | -1.079 |
| 96826_at   | 46.6    | 17.9    | 20.1    | 49.5    | 25.3   | 24.6    | 22.8   | 44.7   | 0.689867068 | 33.525    | 29.35    | 4.175   | 1.142248722 | 0.835    | -1.07  |
| 96827_at   | 172.1   | 423.3   | 298.5   | 378     | 311.4  | 361.1   | 346.8  | 252.2  | 0.998750844 | 317.975   | 317.875  | 0.1     | 1.000314589 | 0.8424   | -1.046 |
| 96828_at   | 75.9    | 63.3    | 56.5    | 10.6    | 100.3  | 81.6    | 58.7   | 22.3   | 0.544731893 | 51.575    | 65.725   | 14.15   | 0.784709015 | 0.5832   | 1.387  |
| 96829_at   | 745.8   | 1307.2  | 784.6   | 999.3   | 1018.6 | 1052.6  | 1041.9 | 1029.9 | 0.594268077 | 959.225   | 1035.75  | 76.525  | 0.926116341 | 0.4578   | 1.108  |
| 96831_at   | 603.8   | 613.6   | 342.3   | 510.9   | 623.4  | 561.5   | 553.7  | 726.3  | 0.24190351  | 517.65    | 616.225  | 98.575  | 0.840034078 | 0.2423   | 1.214  |
| 96832_at   | 882.6   | 1469.8  | 890.3   | 1130.5  | 2315.4 | 927.9   | 1190   | 1397.5 | 0.3308523   | 1093.3    | 1457.7   | 364.4   | 0.75001715  | 0.3114   | 1.286  |
| 96833_at   | 169     | 353.8   | 302.9   | 277.7   | 323.9  | 283     | 279.2  | 225.8  | 0.963438108 | 275.85    | 277.975  | 2.125   | 0.992355428 | 0.8498   | -1.035 |
| 96834_at   | 2479.3  | 3904.5  | 2597.4  | 3167.2  | 3004.6 | 3260.2  | 3494.5 | 3268.4 | 0.558128198 | 3037.1    | 3256.925 | 219.825 | 0.932505354 | 0.4629   | -1.089 |
| 96835_at   | 143.7   | 197.6   | 190.9   | 89.6    | 186.7  | 198.1   | 153.7  | 77.8   | 0.971482155 | 155.45    | 154.075  | 1.375   | 1.008924225 | 0.9368   | -1.024 |
| 96836_r_at | 88.4    | 71.2    | 69      | 83.7    | 110.2  | 104.2   | 76.8   | 85.4   | 0.140051585 | 78.075    | 94.15    | 16.075  | 0.829261816 | 0.1301   | 1.2    |
| 96837_at   | 725.9   | 914.1   | 1023.6  | 909     | 880.7  | 935.1   | 976.6  | 1031.3 | 0.411873551 | 893.15    | 955.925  | 62.775  | 0.934330622 | 0.3884   | -1.077 |
| 96838_at   | 551.1   | 588.1   | 594     | 528.1   | 697.7  | 559.4   | 617.9  | 564.8  | 0.274270424 | 565.325   | 609.95   | 44.625  | 0.926838265 | 0.2564   | -1.076 |
| 96839_at   | 182     | 299.7   | 364.7   | 292.6   | 263.4  | 351.4   | 340.2  | 362.6  | 0.3584594   | 284.75    | 329.4    | 44.65   | 0.864450516 | 0.3458   | 1.183  |
| 96840_at   | 1379    | 1315.8  | 1467.5  | 1295.6  | 1314.6 | 1291.4  | 1294.9 | 1512.1 | 0.870593987 | 1364.475  | 1353.25  | 11.225  | 1.008294846 | 0.8503   | -1.009 |
| 96841_at   | 291.9   | 406     | 541.3   | 369.8   | 399.7  | 492.1   | 510.3  | 415.5  | 0.42028738  | 402.25    | 454.4    | 52.15   | 0.885233275 | 0.3572   | 1.151  |
| 96843_at   | 217.7   | 209     | 277     | 274.7   | 293.6  | 219.8   | 232.9  | 205.9  | 0.813035437 | 244.6     | 238.05   | 6.55    | 1.027515228 | 0.803    | -1.028 |
| 96845_at   | 301.7   | 392.1   | 420.1   | 397     | 472.5  | 405.5   | 449.6  | 309.7  | 0.506288955 | 377.725   | 409.325  | 31.6    | 0.922799731 | 0.5521   | -1.078 |
| 96846_at   | 30.2    | 17.1    | 6.4     | 11.3    | 14.9   | 10.4    | 12.5   | 71     | 0.521663272 | 16.25     | 27.2     | 10.95   | 0.597426471 | 0.574    | 1.386  |
| 96847_at   | 1647.2  | 1740.7  | 1547.7  | 1886.2  | 2001.6 | 1541    | 1747.9 | 1992.8 | 0.419803383 | 1705.45   | 1820.825 | 115.375 | 0.936635866 | 0.4379   | -1.064 |
| 96848_at   | 29.6    | 60      | 42.3    | 65.4    | 62.5   | 69.8    | 41.2   | 87.5   | 0.255003822 | 49.325    | 65.25    | 15.925  | 0.755938697 | 0.2722   | 1.337  |
| 96849_at   | 767.9   | 527.5   | 722.7   | 625.2   | 655.4  | 763.6   | 685.9  | 682.5  | 0.569558252 | 660.825   | 696.85   | 36.025  | 0.948303078 | 0.5177   | -1.064 |
| 96850_at   | 332     | 501.9   | 363.3   | 409     | 340.5  | 399     | 371.4  | 485.7  | 0.962115979 | 401.55    | 399.15   | 2.4     | 1.006012777 | 0.9828   | -1.003 |
| 96852_at   | 5658.2  | 5420.4  | 5496.6  | 5456.3  | 5070.4 | 5418.9  | 5695.1 | 5255.3 | 0.35888119  | 5507.875  | 5359.925 | 147.95  | 1.027602998 | 0.3287   | -1.028 |
| 96854_at   | 4715    | 4111    | 5001    | 4483.3  | 3056.9 | 4792.8  | 4485.1 | 4584.7 | 0.469500867 | 4577.575  | 4229.875 | 347.7   | 1.082201011 | 0.445    | -1.096 |
| 96855_at   | 1453.9  | 1364    | 1209.5  | 1339.9  | 975.3  | 1253.1  | 996.9  | 1248.4 | 0.057023821 | 1341.825  | 1118.425 | 223.4   | 1.199745177 | 0.05497  | -1.206 |
| 96856_at   | 69.1    | 67.4    | 69.9    | 55.7    | 72.9   | 57.9    | 41.6   | 50.3   | 0.248884453 | 65.525    | 55.675   | 9.85    | 1.176919623 | 0.2157   | -1.197 |
| 96857_at   | 14.7    | 13.7    | 17.4    | 12.7    | 24.2   | 22.1    | 23.5   | 12.8   | 0.10370731  | 14.625    | 20.65    | 6.025   | 0.708232446 | 0.09575  | 1.383  |
| 96858_at   | 2204.8  | 1740.5  | 2003.4  | 2436.8  | 1949.4 | 1832.3  | 1834.4 | 2167.3 | 0.414065153 | 2096.375  | 1945.85  | 150.525 | 1.077356939 | 0.4295   | -1.072 |
| 96859_at   | 1414.2  | 3370.1  | 2822.1  | 5110.6  | 1726.7 | 4596.7  | 2417.3 | 4875.6 | 0.844095319 | 3179.25   | 3404.075 | 224.825 | 0.933954158 | 0.8411   | -1.08  |
| 96861_at   | 741     | 511.4   | 613     | 605.6   | 512.6  | 588.3   | 433.8  | 555.8  | 0.156249833 | 617.75    | 522.625  | 95.125  | 1.182013872 | 0.1524   | -1.179 |
| 96862_at   | 2510.2  | 2360.2  | 2374.2  | 2576.3  | 2515.5 | 2534.1  | 2416.4 | 2590.1 | 0.397302139 | 2455.225  | 2514.025 | 58.8    | 0.976611211 | 0.3884   | -1.024 |
| 96864_at   | 263.2   | 321.6   | 286.4   | 230.9   | 343.1  | 305.9   | 305.4  | 268.4  | 0.265483855 | 275.525   | 305.7    | 30.175  | 0.901292116 | 0.2588   | 1.113  |
| 96865_at   | 2947.3  | 3482.5  | 2572.7  | 3182.4  | 2549.6 | 2946    | 2934.4 | 3185.3 | 0.5660037   | 3046.225  | 2903.825 | 142.4   | 1.049038768 | 0.5904   | -1.046 |
| 96866_at   | 107.7   | 37.2    | 29.6    | 30.4    | 186.6  | 56.5    | 143.4  | 116.8  | 0.070708964 | 51.225    | 125.825  | 74.6    | 0.407113054 | 0.05073  | 2.645  |
| 96867_at   | 38.5    | 46.1    | 21      | 88.4    | 33.2   | 119.9   | 60.4   | 66.9   | 0.387598865 | 48.5      | 70.1     | 21.6    | 0.691868759 | 0.3551   | 1.486  |
| 96868_at   | 2.8     | 3.2     | 3.3     | 3       | 2.2    | 3.9     | 3.3    | 5.2    | 0.42828825  | 3.075     | 3.65     | 0.575   | 0.842465753 | 0.5352   | 1.126  |
| 96869_at   | 5226.1  | 4380.8  | 4796.8  | 4352.3  | 4564.6 | 4980.7  | 4357.5 | 4544.3 | 0.764420101 | 4689      | 4611.775 | 77.225  | 1.016745179 | 0.781    | -1.015 |
| 96870_at   | 4080.3  | 4098.7  | 4613.4  | 3666.2  | 4325.8 | 4100.9  | 3948.3 | 3945.5 | 0.87904183  | 4114.65   | 4080.125 | 34.525  | 1.008461751 | 0.9136   | -1.006 |
| 96871_at   | 590.3   | 549.4   | 571.4   | 479.7   | 392.4  | 458.2   | 463.3  | 426.8  | 0.010765243 | 547.7     | 435.175  | 112.525 | 1.258574137 | 0.008504 | -1.257 |
| 96872_at   | 1744.9  | 1947.7  | 1799.6  | 1832    | 2019.7 | 1769.1  | 2058.3 | 2356.9 | 0.165250275 | 1831.05   | 2051     | 219.95  | 0.892759629 | 0.1346   | 1.115  |
| 96873_at   | 314.8   | 371.4   | 415.7   | 334.4   | 204    | 350.7   | 316.1  | 322    | 0.177694552 | 359.075   | 298.2    | 60.875  | 1.204141516 | 0.1914   | -1.222 |
| 96874_g_at | 5535.1  | 4727.4  | 5076.2  | 4765.1  | 4813.6 | 4731.9  | 4613.1 | 5341.9 | 0.563714052 | 5025.95   | 4875.125 | 150.825 | 1.030937668 | 0.5597   | -1.031 |
| 96875_r_at | 175     | 76.8    | 140.7   | 206.5   | 154    | 174.9   | 169.9  | 103.3  | 0.981778449 | 149.75    | 150.525  | 0.775   | 0.994851354 | 0.8537   | -1.049 |
| 96876_at   | 10678.4 | 11541.4 | 10087.9 | 11364.2 | 8073.8 | 10250.4 | 8019.5 | 9524.8 | 0.029725382 | 10917.975 | 8967.125 | 1950.85 | 1.217555794 | 0.02614  | -1.223 |
| 96878_at   | 607.7   | 487.7   | 513.7   | 581.2   | 440.9  | 546.8   | 408.4  | 415.8  | 0.068981531 | 547.575   | 452.975  | 94.6    | 1.208841548 | 0.06302  | -1.213 |
| 96879_at   | 718.4   | 1054.2  | 802.9   | 928.9   | 979.6  | 950.6   | 1077.8 | 1005.8 | 0.18287043  | 876.1     | 1003.45  | 127.35  | 0.873087847 | 0.1502   | 1.156  |
| 96881_at   | 1225.8  | 954.7   | 1130.6  | 1007.3  | 1118.3 | 1080.9  | 1050.6 | 856.1  | 0.55303308  | 1079.6    | 1026.475 | 53.125  | 1.051754792 | 0.559    | -1.052 |
| 96882_at   | 4834.3  | 3332.6  | 3228.4  | 4029    | 2976.8 | 3721.3  | 2782.6 | 2351.4 | 0.107012567 | 3856.075  | 2958.025 | 898.05  | 1.30359784  | 0.09375  | -1.304 |
| 96883_at   | 4201.7  | 4648.6  | 4829.8  | 3564.5  | 5692.5 | 4062.4  | 4768.4 | 3920.9 | 0.568354012 | 4311.15   | 4611.05  | 299.9   | 0.934960584 | 0.5853   | -1.065 |
| 96884_at   | 1008.5  | 1316.1  | 1377.7  | 1223.3  | 817.2  | 1022.8  | 1074.3 | 951.2  | 0.040087053 | 1231.4    | 966.375  | 265.025 | 1.27424654  | 0.03832  | -1.272 |
| 96885_at   | 1303.8  | 2103.1  | 1823.5  | 1509.5  | 2236   | 2040.4  | 1924.5 | 1961.2 | 0.134404502 | 1684.975  | 2040.525 | 355.55  | 0.825755627 | 0.1103   | 1.229  |
| 96886_at   | 127.5   | 232.5   | 168.6   | 195.9   | 241.1  | 180.7   | 192.7  | 279.1  | 0.230978345 | 181.125   | 223.4    | 42.275  | 0.810765443 | 0.2275   | 1.244  |
| 96887_at   | 3963.1  | 3717.5  | 3425.2  | 3244.8  | 5048.8 | 3176.2  | 3511.2 | 3543.1 | 0.631964292 | 3587.65   | 3819.825 | 232.175 | 0.93921842  | 0.6711   | -1.051 |



|            |        |        |        |        |         |        |         |         |              |          |          |         |             |          |        |
|------------|--------|--------|--------|--------|---------|--------|---------|---------|--------------|----------|----------|---------|-------------|----------|--------|
| 96888_at   | 9525.5 | 9063.6 | 9454.5 | 8592.9 | 10420.8 | 8674.7 | 10061.6 | 10742.5 | 0.175749963  | 9159.125 | 9974.9   | 815.775 | 0.918217225 | 0.1687   | -1.086 |
| 96890_at   | 1111.6 | 859    | 836.7  | 948.8  | 881.5   | 986    | 845     | 806.9   | 0.456471693  | 939.025  | 879.85   | 59.175  | 1.067255782 | 0.4559   | -1.064 |
| 96891_at   | 3225.7 | 4418.2 | 4299.9 | 3594.6 | 4123.4  | 3613.2 | 4380.7  | 3489.6  | 0.963159192  | 3884.6   | 3901.725 | 17.125  | 0.995610916 | 0.931    | -1.008 |
| 96892_at   | 1075   | 802.8  | 912.6  | 1009.7 | 976.9   | 813.4  | 865     | 794.8   | 0.275829057  | 950.025  | 862.525  | 87.5    | 1.101446335 | 0.278    | -1.098 |
| 96894_at   | 1921.8 | 1784.5 | 1487.6 | 1669.1 | 1490    | 1701.9 | 1850.3  | 1610.6  | 0.675444111  | 1715.75  | 1663.2   | 52.55   | 1.031595719 | 0.6884   | -1.03  |
| 96895_at   | 14     | 13.8   | 26.5   | 12.1   | 47.4    | 12.1   | 12.4    | 25.1    | 0.440715817  | 16.6     | 24.25    | 7.65    | 0.684536082 | 0.5035   | 1.301  |
| 96896_at   | 2707.9 | 2109.3 | 2227.7 | 2536.7 | 1408.7  | 2255.1 | 1945.6  | 1356.1  | 0.050814087  | 2395.4   | 1741.375 | 654.025 | 1.375579643 | 0.04869  | -1.401 |
| 96898_at   | 157.5  | 218.8  | 96.6   | 211.6  | 225.6   | 118.9  | 232.6   | 243.9   | 0.432656722  | 171.125  | 205.25   | 34.125  | 0.833739342 | 0.4777   | 1.212  |
| 96899_at   | 2720.7 | 3098   | 2862.7 | 2323.8 | 4409.5  | 2799.7 | 3254.1  | 2534.9  | 0.326898243  | 2751.3   | 3249.55  | 498.25  | 0.846671078 | 0.3119   | 1.161  |
| 96900_at   | 6579.3 | 9615.7 | 8923   | 7298.2 | 10274.7 | 6679.5 | 8170.4  | 5422.8  | 0.724853622  | 8104.05  | 7636.85  | 467.2   | 1.061177056 | 0.6567   | -1.079 |
| 96902_at   | 663.5  | 786.5  | 614.5  | 633.2  | 944     | 824    | 682.8   | 773     | 0.101843412  | 674.425  | 805.95   | 131.525 | 0.836807494 | 0.08966  | 1.192  |
| 96904_at   | 641.4  | 550.2  | 594.3  | 534.4  | 671.2   | 508.6  | 646.2   | 644.8   | 0.430580889  | 580.075  | 617.7    | 37.625  | 0.939088554 | 0.4603   | -1.061 |
| 96905_at   | 21.5   | 49.2   | 48.9   | 33     | 48.6    | 5      | 51      | 56      | 0.889060173  | 38.15    | 40.15    | 2       | 0.9501868   | 0.7287   | -1.251 |
| 96906_at   | 1.7    | 3.6    | 1.9    | 3.7    | 3.7     | 3.2    | 5.2     | 5.8     | 0.075982609  | 2.725    | 4.475    | 1.75    | 0.608938547 | 0.07856  | 1.709  |
| 96907_at   | 232.9  | 634.1  | 339.1  | 514.2  | 327.6   | 423.3  | 433.5   | 426.8   | 0.785647453  | 430.075  | 402.8    | 27.275  | 1.067713505 | 0.997    | -1.001 |
| 96908_at   | 33.9   | 43.1   | 52.8   | 48.4   | 27.3    | 32.2   | 52.7    | 8.8     | 0.219130566  | 44.55    | 30.25    | 14.3    | 1.472727273 | 0.2062   | -1.738 |
| 96909_at   | 3510.6 | 3721.4 | 3308.4 | 2944.1 | 4707.8  | 2984.6 | 4052.3  | 3007.7  | 0.523247515  | 3371.125 | 3688.1   | 316.975 | 0.914054662 | 0.5702   | -1.077 |
| 96910_at   | 98     | 104.7  | 163.4  | 65.9   | 152.4   | 57.9   | 104.7   | 165.3   | 0.717771848  | 108      | 120.075  | 12.075  | 0.899437851 | 0.7973   | -1.085 |
| 96911_at   | 2000   | 4886.3 | 3293   | 2917.8 | 4369.6  | 3395.5 | 3537    | 3116.3  | 0.641906948  | 3274.275 | 3604.6   | 330.325 | 0.908360151 | 0.509    | 1.149  |
| 96912_s_at | 307.2  | 273    | 294    | 247    | 340.7   | 354.3  | 358.5   | 313     | 0.011480313  | 280.3    | 341.625  | 61.325  | 0.820490304 | 0.01245  | 1.221  |
| 96913_at   | 3262.4 | 2665.2 | 3119.4 | 2672.4 | 2414.1  | 2824.8 | 2767.3  | 2392.6  | 0.139172063  | 2929.85  | 2599.7   | 330.15  | 1.126995423 | 0.1338   | -1.126 |
| 96915_f_at | 4727.3 | 3931.4 | 4459.8 | 3959.9 | 4761.5  | 3903.4 | 4119.8  | 3664.3  | 0.625833624  | 4269.6   | 4112.25  | 157.35  | 1.038263724 | 0.6052   | -1.04  |
| 96916_at   | 576.4  | 548.2  | 581.4  | 679    | 677.7   | 704.6  | 591.7   | 517.7   | 0.623786317  | 596.25   | 622.925  | 26.675  | 0.95717783  | 0.6528   | -1.041 |
| 96917_at   | 969.3  | 712    | 820.6  | 849.5  | 888.8   | 882.1  | 927.5   | 771.4   | 0.656043829  | 837.85   | 867.45   | 29.6    | 0.965876996 | 0.627    | -1.039 |
| 96918_at   | 23.2   | 45.4   | 13.7   | 32.5   | 55.8    | 15.9   | 12.4    | 50.6    | 0.722186318  | 28.7     | 33.675   | 4.975   | 0.852264291 | 0.9295   | -1.044 |
| 96919_at   | 6731.9 | 5184.9 | 6153.8 | 4918.9 | 5494.4  | 5963   | 6166    | 5365    | 0.999553178  | 5747.375 | 5747.1   | 0.275   | 1.00004785  | 0.9395   | -1.006 |
| 96920_at   | 2073.6 | 2668.3 | 1869.4 | 1752.6 | 2074.8  | 2963.2 | 2917.4  | 2478.6  | 0.126283325  | 2090.975 | 2608.5   | 517.525 | 0.801600537 | 0.1217   | 1.251  |
| 96921_at   | 433.5  | 327.6  | 330.4  | 367.8  | 206.1   | 352    | 393.7   | 512.8   | 0.985397698  | 364.825  | 366.15   | 1.325   | 0.996381265 | 0.8455   | -1.042 |
| 96924_at   | 1385.4 | 1273.3 | 1368.7 | 1536.5 | 1175.6  | 1348.2 | 1519.9  | 900.1   | 0.339305981  | 1390.975 | 1235.95  | 155.025 | 1.125429831 | 0.3023   | -1.144 |
| 96925_at   | 1106.9 | 1414.5 | 1267.5 | 1323.8 | 1122.4  | 1272.9 | 1156.1  | 1432.9  | 0.74794731   | 1278.175 | 1246.075 | 32.1    | 1.025760889 | 0.742    | -1.026 |
| 96926_at   | 2372.6 | 3020.1 | 2753.2 | 2429.5 | 2957.2  | 3259.3 | 3258.3  | 2837.4  | 0.061926564  | 2643.85  | 3078.05  | 434.2   | 0.858936664 | 0.05818  | 1.168  |
| 96929_at   | 29.6   | 20.2   | 25     | 36.2   | 26.9    | 20.3   | 19.1    | 40.4    | 0.863418483  | 27.75    | 26.675   | 1.075   | 1.040299906 | 0.7711   | -1.066 |
| 96930_at   | 186.6  | 270.8  | 261    | 232.6  | 295.3   | 190    | 279.9   | 259.3   | 0.562863639  | 237.75   | 256.125  | 18.375  | 0.928257687 | 0.6042   | -1.073 |
| 96931_at   | 12.5   | 7.8    | 18.2   | 12.3   | 98.8    | 28.4   | 34.4    | 54.6    | 0.079486326  | 12.7     | 54.05    | 41.35   | 0.234967623 | 0.005742 | 3.946  |
| 96932_at   | 181    | 148.6  | 241.4  | 193.8  | 92      | 202.9  | 164.5   | 152.9   | 0.252000946  | 191.2    | 153.075  | 38.125  | 1.249060918 | 0.2537   | -1.28  |
| 96934_at   | 2158.8 | 1245.4 | 1354.4 | 1579.8 | 1596    | 1251.7 | 1311.1  | 1333.8  | 0.388309916  | 1584.6   | 1373.15  | 211.45  | 1.153989003 | 0.3825   | -1.133 |
| 96935_at   | 214.2  | 189.9  | 116.3  | 152    | 222.9   | 140.2  | 208     | 192.3   | 0.4448992044 | 168.1    | 190.85   | 22.75   | 0.880796437 | 0.4453   | 1.148  |
| 96936_at   | 1378.6 | 1193.6 | 1309.8 | 1284.2 | 1233.8  | 1324.4 | 1358.1  | 1141.4  | 0.677483238  | 1291.55  | 1264.425 | 27.125  | 1.021452439 | 0.6679   | -1.022 |
| 96937_at   | 3.1    | 17.9   | 2.5    | 4.9    | 49.3    | 14.7   | 2.9     | 14.3    | 0.288003069  | 7.1      | 20.3     | 13.2    | 0.349753695 | 0.2438   | 2.575  |
| 96938_at   | 9.5    | 9.6    | 7.6    | 21.6   | 5.9     | 19.4   | 19.2    | 37.2    | 0.303828321  | 12.075   | 20.425   | 8.35    | 0.591187271 | 0.3789   | 1.53   |
| 96939_at   | 864.2  | 824.3  | 923.9  | 1037   | 949.2   | 877.1  | 1057.5  | 897.8   | 0.610169486  | 912.35   | 945.4    | 33.05   | 0.965041252 | 0.5925   | -1.037 |
| 96940_at   | 308    | 478.3  | 464.7  | 317.1  | 487.8   | 386.5  | 409.9   | 341.3   | 0.805104055  | 392.025  | 406.375  | 14.35   | 0.964687788 | 0.7405   | -1.05  |
| 96941_at   | 1139.2 | 1431.4 | 1371.1 | 1130.6 | 1804.5  | 1113.4 | 1327.1  | 1357.9  | 0.460293316  | 1268.075 | 1400.725 | 132.65  | 0.905299042 | 0.4728   | 1.094  |
| 96942_at   | 6594.4 | 5552.2 | 6567.3 | 5660.5 | 6420.5  | 5741.6 | 6957    | 5919.3  | 0.687383288  | 6093.6   | 6259.6   | 166     | 0.973480734 | 0.682    | -1.028 |
| 96943_at   | 3641.6 | 3798.1 | 3613.5 | 3028.5 | 5160.9  | 3576.6 | 3737.3  | 3211.3  | 0.433165968  | 3520.425 | 3921.525 | 401.1   | 0.897718362 | 0.4346   | -1.1   |
| 96945_at   | 203.6  | 183.5  | 202.1  | 175    | 200.1   | 214.6  | 219.8   | 205.9   | 0.069794302  | 191.05   | 210.1    | 19.05   | 0.909328891 | 0.06458  | -1.101 |
| 96946_at   | 553.8  | 479.9  | 533.9  | 629.6  | 700.8   | 444.4  | 690.8   | 420     | 0.867057932  | 549.3    | 564      | 14.7    | 0.97393617  | 0.9855   | -1.003 |
| 96947_at   | 1688.2 | 1328.2 | 1492.6 | 1232   | 1974.1  | 1498.4 | 1734.5  | 1572.3  | 0.124306239  | 1435.25  | 1694.825 | 259.575 | 0.846842594 | 0.1178   | 1.183  |
| 96948_at   | 2762.1 | 2657.1 | 2989.4 | 2896   | 2317.7  | 2476.5 | 2453.9  | 2626.2  | 0.010480235  | 2826.15  | 2468.575 | 357.575 | 1.144850774 | 0.009958 | -1.145 |
| 96949_at   | 1652.7 | 1758   | 1592.3 | 1838.1 | 1319.4  | 1754.2 | 1635.3  | 1745.1  | 0.443243369  | 1710.275 | 1613.5   | 96.775  | 1.059978308 | 0.4266   | -1.065 |
| 96950_at   | 249.7  | 259.9  | 297.5  | 241.4  | 347.1   | 257.4  | 298.5   | 312.1   | 0.118122377  | 262.125  | 303.775  | 41.65   | 0.862891943 | 0.109    | 1.156  |
| 96951_at   | 1365   | 1018.4 | 1195.7 | 1252.6 | 1181    | 1140   | 1196.3  | 1211.8  | 0.749768727  | 1207.925 | 1182.275 | 25.65   | 1.02169546  | 0.8057   | -1.016 |
| 96952_at   | 5413.8 | 5502.6 | 6084.9 | 5039.4 | 7132.5  | 5082   | 4237.4  | 5645.9  | 0.983507404  | 5510.175 | 5524.45  | 14.275  | 0.997416032 | 0.9138   | -1.013 |
| 96953_at   | 38.1   | 52.2   | 67.6   | 66.5   | 36.9    | 71.2   | 48      | 41.7    | 0.542475503  | 56.1     | 49.45    | 6.65    | 1.134479272 | 0.5239   | -1.142 |
| 96954_at   | 606.1  | 673.7  | 669.3  | 646.8  | 481.1   | 737.8  | 669.8   | 909.5   | 0.610990163  | 648.975  | 699.55   | 50.575  | 0.927703524 | 0.7215   | -1.052 |
| 96955_at   | 1091.3 | 774.1  | 1377.2 | 924.4  | 1262.6  | 922.4  | 1348.3  | 1074.2  | 0.520879232  | 1041.75  | 1151.875 | 110.125 | 0.904395008 | 0.4796   | 1.119  |



|            |         |         |        |        |         |         |         |         |             |           |          |          |             |          |        |
|------------|---------|---------|--------|--------|---------|---------|---------|---------|-------------|-----------|----------|----------|-------------|----------|--------|
| 96956_at   | 3430.4  | 2731.6  | 3175.4 | 2544.1 | 2880    | 2923.8  | 3055.2  | 2601.8  | 0.66152984  | 2970.375  | 2865.2   | 105.175  | 1.036707734 | 0.7004   | -1.031 |
| 96957_at   | 287.6   | 306.3   | 366.9  | 367.4  | 407.9   | 288.4   | 360.3   | 338     | 0.625905658 | 332.05    | 348.65   | 16.6     | 0.952387781 | 0.6406   | -1.048 |
| 96958_at   | 9.2     | 9.6     | 4.8    | 30.4   | 6.6     | 28      | 9.9     | 10.5    | 0.974512583 | 13.5      | 13.75    | 0.25     | 0.981818182 | 0.8503   | -1.102 |
| 96959_at   | 2324.7  | 2947.6  | 2861.3 | 2806   | 2634.1  | 2406.1  | 2645.7  | 2849.3  | 0.569700944 | 2734.9    | 2633.8   | 101.1    | 1.038385603 | 0.6007   | -1.036 |
| 96961_at   | 66.4    | 92.5    | 113.3  | 317.4  | 133     | 187.9   | 238.4   | 290.1   | 0.375720482 | 147.4     | 212.35   | 64.95    | 0.694137038 | 0.2213   | 1.672  |
| 96962_at   | 13886.1 | 14038.8 | 13873  | 12260  | 22837.3 | 11684.7 | 15854.4 | 13297.4 | 0.403039343 | 13514.475 | 15918.45 | 2403.975 | 0.848981842 | 0.409    | 1.141  |
| 96963_s_at | 127.8   | 131.7   | 130.5  | 109.6  | 116.7   | 120.5   | 111.5   | 130.8   | 0.475696055 | 124.9     | 119.875  | 5.025    | 1.041918665 | 0.491    | -1.041 |
| 96964_at   | 8.6     | 4.9     | 6.2    | 6.8    | 6.5     | 13.1    | 5       | 26.4    | 0.299267803 | 6.625     | 12.75    | 6.125    | 0.519607843 | 0.2847   | 1.585  |
| 96965_at   | 43.7    | 27.9    | 19.8   | 26.3   | 28.6    | 25.9    | 26.3    | 27.6    | 0.679076101 | 29.425    | 27.1     | 2.325    | 1.085793358 | 0.8115   | -1.042 |
| 96966_at   | 18.2    | 14.3    | 23.4   | 1.5    | 6.5     | 17.5    | 8.5     | 20.8    | 0.866241404 | 14.35     | 13.325   | 1.025    | 1.076923077 | 0.7843   | 1.219  |
| 96967_at   | 20.5    | 4.6     | 9.1    | 8.4    | 5.7     | 11.6    | 10.2    | 10.4    | 0.765234083 | 10.65     | 9.475    | 1.175    | 1.124010554 | 0.9805   | -1.009 |
| 96968_at   | 148.7   | 157.9   | 131.1  | 195.5  | 164.4   | 193.2   | 173.9   | 187.7   | 0.22208654  | 158.3     | 179.8    | 21.5     | 0.880422692 | 0.1866   | 1.146  |
| 96969_at   | 28.2    | 11.5    | 48     | 10.4   | 75.3    | 10.6    | 42.9    | 41.2    | 0.307084047 | 24.525    | 42.5     | 17.975   | 0.577058824 | 0.3671   | 1.717  |
| 96970_at   | 75.9    | 150.7   | 113.8  | 113.9  | 24.6    | 57.8    | 33.4    | 14.8    | 0.006402807 | 113.575   | 32.65    | 80.925   | 3.47856049  | 0.005685 | -3.81  |
| 96971_f_at | 79.8    | 39.2    | 78.8   | 63.8   | 119.4   | 80.9    | 79.4    | 119.4   | 0.060194482 | 65.4      | 99.775   | 34.375   | 0.655474818 | 0.07217  | 1.553  |
| 96972_f_at | 207.8   | 165.5   | 207.4  | 207.8  | 184.4   | 209     | 221.6   | 183.6   | 0.864050878 | 197.125   | 199.65   | 2.525    | 0.987352868 | 0.8561   | -1.014 |
| 96973_f_at | 6.5     | 11.7    | 15.6   | 16.3   | 7.2     | 8.2     | 6.1     | 4.2     | 0.066685238 | 12.525    | 6.425    | 6.1      | 1.949416342 | 0.04771  | -1.889 |
| 96974_at   | 34.5    | 13.8    | 27.7   | 10.3   | 46.1    | 44.8    | 15.5    | 15.2    | 0.433727593 | 21.575    | 30.4     | 8.825    | 0.709703947 | 0.4813   | 1.375  |
| 96975_at   | 152.1   | 141.8   | 136.7  | 149.3  | 119.1   | 140.1   | 105.3   | 91.3    | 0.052429263 | 144.975   | 113.95   | 31.025   | 1.272268539 | 0.03674  | -1.287 |
| 96976_f_at | 79.1    | 94.1    | 116.2  | 87.8   | 113.6   | 105.5   | 142.1   | 130.8   | 0.046187962 | 94.3      | 123      | 28.7     | 0.766666667 | 0.04324  | 1.309  |
| 96977_at   | 45.9    | 51.9    | 67.6   | 70.5   | 64.2    | 30.5    | 17.2    | 78.4    | 0.501659714 | 58.975    | 47.575   | 11.4     | 1.23962165  | 0.3548   | -1.441 |
| 96978_at   | 1126    | 947.8   | 1128   | 1164.5 | 849.2   | 1069.1  | 1350.3  | 1006.9  | 0.853118254 | 1091.575  | 1068.875 | 22.7     | 1.021237282 | 0.7754   | -1.032 |
| 96979_at   | 4.4     | 17.2    | 17.7   | 12.4   | 1.6     | 6.2     | 11.3    | 3.6     | 0.106325818 | 12.925    | 5.675    | 7.25     | 2.27753304  | 0.1295   | -2.513 |
| 96980_at   | 49.3    | 55.6    | 44.3   | 66.9   | 12.6    | 80.9    | 58.8    | 55.9    | 0.902720887 | 54.025    | 52.05    | 1.975    | 1.037944284 | 0.6206   | -1.249 |
| 96981_at   | 22.4    | 57.9    | 57.3   | 58.7   | 67.9    | 37.8    | 45.6    | 83.3    | 0.510993208 | 49.075    | 58.65    | 9.575    | 0.836743393 | 0.5266   | 1.222  |
| 96982_g_at | 7       | 5.2     | 10.7   | 6.6    | 8.4     | 6.3     | 7.3     | 8.4     | 0.868616071 | 7.375     | 7.6      | 0.225    | 0.970394737 | 0.719    | -1.064 |
| 96983_at   | 14.3    | 29.4    | 25.5   | 30.9   | 27.7    | 21.8    | 25.4    | 24      | 0.943451625 | 25.025    | 24.725   | 0.3      | 1.012133468 | 0.8891   | -1.027 |
| 96984_at   | 46.1    | 60.4    | 44.6   | 73.4   | 73.8    | 75.5    | 72.2    | 75      | 0.075575503 | 56.125    | 74.125   | 18       | 0.757166948 | 0.04499  | 1.348  |
| 96985_at   | 62.1    | 84.9    | 84.1   | 64     | 52.3    | 79.3    | 91.2    | 93.8    | 0.654841101 | 73.775    | 79.15    | 5.375    | 0.932090967 | 0.741    | -1.057 |
| 96986_at   | 151     | 326.1   | 266.1  | 288.8  | 334.1   | 164.2   | 275.2   | 334.2   | 0.742760219 | 258       | 276.925  | 18.925   | 0.931660197 | 0.7736   | -1.075 |
| 96987_at   | 483.1   | 532.4   | 688.6  | 650.3  | 735.8   | 648.6   | 585.1   | 695.6   | 0.237278882 | 588.6     | 666.275  | 77.675   | 0.883419009 | 0.2259   | 1.14   |
| 96992_r_at | 52.2    | 31.8    | 49.7   | 33.9   | 9.4     | 11.2    | 12.1    | 43.4    | 0.063522234 | 41.9      | 19.025   | 22.875   | 2.202365309 | 0.03921  | -2.67  |
| 96993_at   | 171     | 152.8   | 173.8  | 182.3  | 190.1   | 172.7   | 175.6   | 154.5   | 0.746556444 | 169.975   | 173.225  | 3.25     | 0.981238274 | 0.7597   | -1.018 |
| 96994_at   | 36.1    | 43.9    | 43.9   | 45.3   | 61.2    | 42.8    | 35.9    | 45      | 0.53323058  | 42.3      | 46.225   | 3.925    | 0.915089237 | 0.5737   | -1.076 |
| 96995_at   | 32.4    | 10.6    | 9.5    | 5.8    | 5.6     | 7.1     | 6       | 26.6    | 0.695393258 | 14.575    | 11.325   | 3.25     | 1.286975717 | 0.6164   | -1.314 |
| 96996_at   | 46.5    | 55.2    | 53.3   | 77.3   | 89.9    | 58.4    | 80.8    | 34.2    | 0.608792036 | 58.075    | 65.825   | 7.75     | 0.882263578 | 0.755    | -1.082 |
| 96997_at   | 29.8    | 4.6     | 18.4   | 33.4   | 4.6     | 17.9    | 26      | 25.4    | 0.720783434 | 21.55     | 18.475   | 3.075    | 1.166441137 | 0.8664   | -1.114 |
| 96998_at   | 12.8    | 44.3    | 24.1   | 65.3   | 75.5    | 44.3    | 78.4    | 27.7    | 0.284661468 | 36.625    | 56.475   | 19.85    | 0.648517043 | 0.2735   | 1.687  |
| 96999_at   | 21.6    | 17.2    | 44     | 9.5    | 28.8    | 29.7    | 25.7    | 54      | 0.290347183 | 23.075    | 34.55    | 11.475   | 0.667872648 | 0.2068   | 1.662  |
| 97000_s_at | 119.6   | 107.8   | 106    | 57.3   | 112.2   | 67.3    | 98.8    | 110.3   | 0.976797128 | 97.675    | 97.15    | 0.525    | 1.005404014 | 0.9538   | -1.012 |
| 97001_r_at | 68.3    | 29.3    | 73.8   | 55.2   | 99.2    | 47.4    | 17.8    | 77.7    | 0.856909841 | 56.65     | 60.525   | 3.875    | 0.935976869 | 0.902    | -1.057 |
| 97002_f_at | 255.8   | 224.3   | 298.5  | 276.8  | 293.7   | 321.9   | 276.7   | 287.4   | 0.154597651 | 263.85    | 294.925  | 31.075   | 0.894634229 | 0.1462   | 1.122  |
| 97003_at   | 45.8    | 7.5     | 20     | 21.5   | 67.1    | 45.4    | 26.6    | 45.9    | 0.097969504 | 23.7      | 46.25    | 22.55    | 0.512432432 | 0.1011   | 2.237  |
| 97004_at   | 619.7   | 740.2   | 622.8  | 751.2  | 949.1   | 556.6   | 689.7   | 753.2   | 0.57906911  | 683.475   | 737.15   | 53.675   | 0.927185783 | 0.6332   | -1.063 |
| 97005_at   | 123.6   | 106.7   | 131.1  | 130.4  | 182     | 142.4   | 140.6   | 120.3   | 0.170563921 | 122.95    | 146.325  | 23.375   | 0.840252862 | 0.1418   | 1.18   |
| 97006_s_at | 63      | 27.5    | 52.4   | 69.9   | 53.9    | 53.5    | 64.2    | 35.1    | 0.895836916 | 53.2      | 51.675   | 1.525    | 1.029511369 | 0.9818   | -1.006 |
| 97007_at   | 54.3    | 59      | 9.2    | 44.6   | 54.8    | 47.3    | 33.9    | 73.9    | 0.47663938  | 41.775    | 52.475   | 10.7     | 0.796093378 | 0.426    | 1.489  |
| 97008_f_at | 5.5     | 3.2     | 21.2   | 7.9    | 41.6    | 11.6    | 7.3     | 11.8    | 0.381012113 | 9.45      | 18.075   | 8.625    | 0.522821577 | 0.272    | 1.936  |
| 97009_f_at | 7.9     | 4.7     | 9.1    | 5.3    | 10.1    | 11      | 3.7     | 7.5     | 0.524882502 | 6.75      | 8.075    | 1.325    | 0.835913313 | 0.6639   | 1.144  |
| 97010_at   | 23.8    | 26.2    | 28.8   | 29.2   | 33.2    | 26.5    | 27.3    | 26.6    | 0.520099733 | 27        | 28.4     | 1.4      | 0.950704225 | 0.5334   | -1.049 |
| 97012_f_at | 236.4   | 163.2   | 217.6  | 203    | 355.5   | 192.4   | 248.3   | 250.6   | 0.201281556 | 205.05    | 261.7    | 56.65    | 0.78353076  | 0.1754   | 1.257  |
| 97013_f_at | 212     | 493.4   | 275.5  | 346.5  | 747.3   | 367.8   | 390.8   | 518.5   | 0.156996742 | 331.85    | 506.1    | 174.25   | 0.655700454 | 0.1254   | 1.537  |
| 97017_f_at | 554.7   | 639.1   | 746.4  | 584.4  | 692.3   | 634.5   | 697     | 621     | 0.55158323  | 631.15    | 661.2    | 30.05    | 0.954552329 | 0.4974   | -1.053 |
| 97048_at   | 4.3     | 4.6     | 8.6    | 7      | 4.6     | 4.2     | 5.4     | 9       | 0.835523025 | 6.125     | 5.8      | 0.325    | 1.056034483 | 0.819    | -1.059 |
| 97049_at   | 2.2     | 4.3     | 2.8    | 4.6    | 4.1     | 3.3     | 2       | 3.2     | 0.670178721 | 3.475     | 3.15     | 0.325    | 1.103174603 | 0.7434   | -1.082 |
| 97052_at   | 14      | 13.9    | 13.8   | 12.1   | 18.2    | 13.6    | 8.6     | 11      | 0.792536207 | 13.45     | 12.85    | 0.6      | 1.046692607 | 0.627    | -1.088 |



|            |         |        |         |        |         |        |         |        |             |           |          |         |             |          |        |
|------------|---------|--------|---------|--------|---------|--------|---------|--------|-------------|-----------|----------|---------|-------------|----------|--------|
| 97053_at   | 136.9   | 111.1  | 106.1   | 146.2  | 128.8   | 144.8  | 148.4   | 105.8  | 0.635038861 | 125.075   | 131.95   | 6.875   | 0.947896931 | 0.6401   | -1.055 |
| 97054_at   | 228.6   | 44.3   | 163.4   | 175.7  | 175.7   | 171.7  | 230.2   | 226.2  | 0.317605205 | 153       | 200.95   | 47.95   | 0.761383429 | 0.3047   | 1.525  |
| 97055_s_at | 10563.3 | 9317.8 | 10735.9 | 9394.5 | 11133.3 | 9259.8 | 10455.8 | 8675.3 | 0.863056929 | 10002.875 | 9881.05  | 121.825 | 1.012329155 | 0.8329   | -1.015 |
| 97058_f_at | 720.6   | 563.1  | 553.5   | 702.2  | 775.6   | 669    | 704.4   | 791.4  | 0.115513032 | 634.85    | 735.1    | 100.25  | 0.863623997 | 0.1095   | 1.164  |
| 97060_at   | 426.2   | 366.7  | 412.4   | 368.1  | 430.8   | 380.9  | 380     | 285.2  | 0.513958961 | 393.35    | 369.225  | 24.125  | 1.065339563 | 0.4792   | -1.075 |
| 97061_g_at | 7828.1  | 7615.5 | 7863.3  | 7860.4 | 9877.8  | 7433   | 8829.9  | 7075.9 | 0.486959909 | 7791.825  | 8304.15  | 512.325 | 0.938304944 | 0.5065   | -1.056 |
| 97073_at   | 6.8     | 5.2    | 1.8     | 4      | 1.3     | 3      | 1.5     | 15.1   | 0.835674907 | 4.45      | 5.225    | 0.775   | 0.851674641 | 0.6926   | -1.299 |
| 97077_f_at | 2385    | 2072.3 | 2138.3  | 2023.9 | 1849.5  | 3063.6 | 1915    | 1794.2 | 0.9983457   | 2154.875  | 2155.575 | 0.7     | 0.999675261 | 0.8639   | -1.024 |
| 97080_at   | 57.3    | 59.3   | 41.2    | 60.4   | 93.1    | 52.8   | 46.9    | 64.7   | 0.428913088 | 54.55     | 64.375   | 9.825   | 0.847378641 | 0.4496   | 1.152  |
| 97082_at   | 177.8   | 88     | 155.9   | 96.7   | 159.2   | 140.6  | 209.6   | 159.7  | 0.212344228 | 129.6     | 167.275  | 37.675  | 0.774772082 | 0.1853   | 1.335  |
| 97083_at   | 193.2   | 173.9  | 165     | 133.4  | 207.2   | 166.2  | 121.1   | 129.6  | 0.674988461 | 166.375   | 156.025  | 10.35   | 1.066335523 | 0.6092   | -1.082 |
| 97084_at   | 19.2    | 7.6    | 10.5    | 2.5    | 15.9    | 22.1   | 5.6     | 13.9   | 0.399773447 | 9.95      | 14.375   | 4.425   | 0.692173913 | 0.3795   | 1.639  |
| 97085_at   | 60.4    | 79.2   | 111.4   | 80.2   | 126.8   | 134    | 70      | 49.2   | 0.627668459 | 82.8      | 95       | 12.2    | 0.871578947 | 0.7827   | -1.082 |
| 97086_i_at | 12.9    | 20.7   | 14.9    | 24.6   | 22.1    | 11.9   | 42.5    | 11.6   | 0.654091417 | 18.275    | 22.025   | 3.75    | 0.829738933 | 0.8429   | -1.073 |
| 97087_f_at | 2.3     | 4.9    | 5.2     | 2.5    | 7       | 15.6   | 6.1     | 5.6    | 0.129542136 | 3.725     | 8.575    | 4.85    | 0.434402332 | 0.04461  | 2.242  |
| 97088_at   | 7.7     | 8.9    | 3.2     | 11.9   | 10.2    | 8.5    | 5.3     | 9      | 0.882562352 | 7.925     | 8.25     | 0.325   | 0.960606061 | 0.7325   | 1.119  |
| 97089_at   | 26.6    | 2.6    | 9.1     | 25     | 38.8    | 30.1   | 29.5    | 20.9   | 0.100363189 | 15.825    | 29.825   | 14      | 0.530595138 | 0.1387   | 2.608  |
| 97090_at   | 79      | 53.3   | 84.4    | 69.7   | 87.8    | 76.6   | 43.2    | 60.5   | 0.714693524 | 71.6      | 67.025   | 4.575   | 1.068258113 | 0.6621   | -1.089 |
| 97091_at   | 184.2   | 125    | 126.2   | 141.7  | 107.8   | 121.8  | 101.7   | 160.4  | 0.306802465 | 144.275   | 122.925  | 21.35   | 1.17368314  | 0.2738   | -1.177 |
| 97092_at   | 118.1   | 157.4  | 102     | 148.6  | 168.4   | 134.5  | 111.6   | 105.9  | 0.943290401 | 131.525   | 130.1    | 1.425   | 1.010953113 | 0.9314   | -1.013 |
| 97094_at   | 22.9    | 20     | 15.3    | 17.4   | 29.8    | 36.6   | 16.3    | 44.5   | 0.116887312 | 18.9      | 31.8     | 12.9    | 0.594339623 | 0.09196  | 1.598  |
| 97095_at   | 107.7   | 99.9   | 98.6    | 96.2   | 55.5    | 78.9   | 72.6    | 73.2   | 0.004320625 | 100.6     | 70.05    | 30.55   | 1.436117059 | 0.003841 | -1.447 |
| 97096_at   | 120.7   | 142.5  | 145.9   | 184    | 36.8    | 185.1  | 80.2    | 111.6  | 0.25591241  | 148.275   | 103.425  | 44.85   | 1.433647571 | 0.1982   | -1.659 |
| 97097_at   | 197.8   | 199.4  | 225.7   | 228.6  | 132.3   | 195.3  | 248.1   | 194.8  | 0.467890537 | 212.875   | 192.625  | 20.25   | 1.105126541 | 0.4036   | -1.13  |
| 97098_at   | 51.2    | 92.4   | 66      | 77.3   | 87.6    | 89.9   | 97.9    | 98.8   | 0.08266945  | 71.725    | 93.55    | 21.825  | 0.766702298 | 0.06736  | 1.332  |
| 97099_at   | 9.7     | 11.9   | 7.9     | 8.8    | 10      | 12.4   | 12.3    | 13.7   | 0.071438406 | 9.575     | 12.1     | 2.525   | 0.791322314 | 0.0683   | 1.274  |
| 97100_at   | 35.6    | 172.5  | 29.7    | 46.6   | 47.2    | 127.5  | 48.7    | 169.4  | 0.573430492 | 71.1      | 98.2     | 27.1    | 0.724032587 | 0.4257   | 1.554  |
| 97101_at   | 27.3    | 9.5    | 45      | 21.6   | 21.7    | 33.9   | 15.7    | 45.4   | 0.748662869 | 25.85     | 29.175   | 3.325   | 0.886032562 | 0.6615   | 1.202  |
| 97102_at   | 177.9   | 108.2  | 138.8   | 133.9  | 87.9    | 150    | 158.2   | 115.8  | 0.608326396 | 139.7     | 127.975  | 11.725  | 1.091619457 | 0.5827   | -1.103 |
| 97103_at   | 381.3   | 407.7  | 384.6   | 353.8  | 370.8   | 399.8  | 306.9   | 330.6  | 0.263967466 | 381.85    | 352.025  | 29.825  | 1.084724096 | 0.2416   | -1.089 |
| 97104_g_at | 962     | 776.7  | 874.7   | 797.9  | 725.1   | 891.8  | 501.4   | 597.1  | 0.132493844 | 852.825   | 678.85   | 173.975 | 1.256279001 | 0.1125   | -1.281 |
| 97105_at   | 256.4   | 265.4  | 227.8   | 324.9  | 186.3   | 196.9  | 205.9   | 285.5  | 0.152673278 | 268.625   | 218.65   | 49.975  | 1.228561628 | 0.1307   | -1.236 |
| 97106_at   | 17      | 9.9    | 7.2     | 5.6    | 7.7     | 6.9    | 9.6     | 7.5    | 0.490679681 | 9.925     | 7.925    | 2       | 1.252365931 | 0.5775   | -1.157 |
| 97107_at   | 94.3    | 84.2   | 82.9    | 91.2   | 97      | 104.8  | 81.1    | 134.1  | 0.244611897 | 88.15     | 104.25   | 16.1    | 0.845563549 | 0.2095   | 1.165  |
| 97108_at   | 36.8    | 118    | 94.7    | 109.3  | 172.8   | 112.5  | 129.5   | 126.5  | 0.09335431  | 89.7      | 135.325  | 45.625  | 0.662848698 | 0.1371   | 1.631  |
| 97109_at   | 10.7    | 5.4    | 5.6     | 5.6    | 5.2     | 4.2    | 4       | 15     | 0.929747639 | 6.825     | 7.1      | 0.275   | 0.961267606 | 0.8093   | -1.093 |
| 97110_at   | 59.4    | 163.6  | 112.3   | 129.9  | 107.7   | 95.2   | 86.2    | 97     | 0.433950413 | 116.3     | 96.525   | 19.775  | 1.204869205 | 0.5912   | -1.134 |
| 97111_at   | 182     | 151.7  | 126     | 175.5  | 145.1   | 159.6  | 120.3   | 127.6  | 0.236622123 | 158.8     | 138.15   | 20.65   | 1.149475208 | 0.2447   | -1.145 |
| 97112_at   | 212.7   | 347.8  | 238.8   | 256.1  | 297.3   | 267.5  | 303     | 338.9  | 0.307796204 | 263.85    | 301.675  | 37.825  | 0.874616723 | 0.2489   | 1.159  |
| 97113_at   | 4.9     | 8.4    | 6.9     | 6.4    | 11.2    | 5.4    | 4.6     | 10.8   | 0.513513145 | 6.65      | 8        | 1.35    | 0.83125     | 0.6392   | 1.135  |
| 97114_at   | 2378.5  | 3227.2 | 3177.8  | 3671.1 | 2451    | 3547   | 3341.2  | 3437   | 0.83435537  | 3113.65   | 3194.05  | 80.4    | 0.974828196 | 0.8358   | -1.028 |
| 97115_at   | 48.3    | 118.9  | 109.7   | 98.1   | 99.4    | 44.8   | 86.6    | 110.5  | 0.706312387 | 93.75     | 85.325   | 8.425   | 1.098740111 | 0.7601   | -1.097 |
| 97116_at   | 86.5    | 84.6   | 124     | 104.2  | 148.8   | 100.9  | 120.6   | 172    | 0.107290187 | 99.825    | 135.575  | 35.75   | 0.736308316 | 0.08988  | 1.347  |
| 97117_at   | 12.1    | 19.6   | 28      | 7.4    | 18.2    | 14.1   | 21.9    | 11.3   | 0.940514834 | 16.775    | 16.375   | 0.4     | 1.024427481 | 0.8499   | -1.066 |
| 97118_at   | 756     | 301    | 578.9   | 565.7  | 531     | 594.3  | 625.2   | 720    | 0.54450689  | 550.4     | 617.625  | 67.225  | 0.891155637 | 0.4619   | 1.175  |
| 97119_at   | 31.1    | 19.8   | 29      | 34.1   | 30      | 26.5   | 25      | 33.9   | 0.927555229 | 28.5      | 28.85    | 0.35    | 0.987868284 | 0.8577   | -1.026 |
| 97120_at   | 35.3    | 21     | 23.6    | 16.6   | 58.3    | 30.2   | 57.5    | 43     | 0.031929785 | 24.125    | 47.25    | 23.125  | 0.510582011 | 0.02228  | 1.966  |
| 97121_at   | 37.1    | 20.2   | 23.2    | 33.6   | 7.9     | 22.7   | 8.9     | 53.1   | 0.659675764 | 28.525    | 23.15    | 5.375   | 1.232181425 | 0.3417   | -1.623 |
| 97122_at   | 99.7    | 347.5  | 208.9   | 224.9  | 140.7   | 195.3  | 257.5   | 268.9  | 0.940132726 | 220.25    | 215.6    | 4.65    | 1.021567718 | 0.901    | -1.04  |
| 97123_at   | 104.7   | 43.1   | 150.8   | 106.1  | 44.7    | 143.4  | 47.2    | 200.9  | 0.865892516 | 101.175   | 109.05   | 7.875   | 0.92778542  | 0.9292   | -1.044 |
| 97124_at   | 94.5    | 194.9  | 144.7   | 173.3  | 92.4    | 159.6  | 112.3   | 122.5  | 0.295153168 | 151.85    | 121.7    | 30.15   | 1.247740345 | 0.3322   | -1.228 |
| 97125_f_at | 52.4    | 83.4   | 93.5    | 135.3  | 162.7   | 157.4  | 160     | 177.8  | 0.019723229 | 91.15     | 164.475  | 73.325  | 0.554187566 | 0.01709  | 1.905  |
| 97126_at   | 30.2    | 41.3   | 22.6    | 16.8   | 43.8    | 52.2   | 35.4    | 42.1   | 0.054541367 | 27.725    | 43.375   | 15.65   | 0.639193084 | 0.05619  | 1.639  |
| 97127_f_at | 18.3    | 20.8   | 21.8    | 25.7   | 37.7    | 22.6   | 39.4    | 18.1   | 0.24310335  | 21.65     | 29.45    | 7.8     | 0.735144312 | 0.2458   | 1.3    |
| 97128_at   | 3.1     | 1.3    | 0.6     | 0.4    | 15.9    | 3.3    | 0.5     | 0.5    | 0.390530837 | 1.35      | 5.05     | 3.7     | 0.267326733 | 0.5263   | 1.924  |
| 97129_at   | 21.3    | 21.3   | 16.1    | 20.8   | 20.9    | 16.6   | 15.1    | 11.4   | 0.15674937  | 19.875    | 16       | 3.875   | 1.2421875   | 0.155    | -1.262 |



|            |        |        |        |        |         |        |        |        |             |          |         |          |             |            |        |
|------------|--------|--------|--------|--------|---------|--------|--------|--------|-------------|----------|---------|----------|-------------|------------|--------|
| 97130_at   | 98.6   | 80.9   | 152.3  | 100.2  | 65.3    | 102.3  | 59.1   | 103.9  | 0.243149129 | 108      | 82.65   | 25.35    | 1.306715064 | 0.2206     | -1.312 |
| 97131_at   | 258.1  | 282.4  | 266.3  | 238.1  | 151.1   | 353.7  | 235.5  | 271.3  | 0.857824654 | 261.225  | 252.9   | 8.325    | 1.032918149 | 0.6913     | -1.079 |
| 97132_at   | 194.8  | 289.2  | 241.4  | 331.1  | 261.4   | 277.3  | 301.9  | 283.4  | 0.615393199 | 264.125  | 281     | 16.875   | 0.939946619 | 0.5252     | -1.083 |
| 97133_at   | 4.2    | 11.6   | 18.6   | 8.3    | 24.2    | 15.9   | 13.9   | 15.7   | 0.131078291 | 10.675   | 17.425  | 6.75     | 0.612625538 | 0.1226     | 1.82   |
| 97134_at   | 17.5   | 42.6   | 40.7   | 7.8    | 30.9    | 30.5   | 22.5   | 8.4    | 0.703140643 | 27.15    | 23.075  | 4.075    | 1.17659805  | 0.8956     | -1.072 |
| 97135_at   | 6      | 4.6    | 11.3   | 5.1    | 23      | 4.5    | 6.7    | 4.3    | 0.580108344 | 6.75     | 9.625   | 2.875    | 0.701298701 | 0.7411     | 1.164  |
| 97136_at   | 108.5  | 60.1   | 30.8   | 186.4  | 117.7   | 99.3   | 59.3   | 171.1  | 0.722814172 | 96.45    | 111.85  | 15.4     | 0.862315601 | 0.5417     | 1.334  |
| 97137_at   | 9.4    | 12     | 9.5    | 8.1    | 16.7    | 24.5   | 19.2   | 16.3   | 0.009679257 | 9.75     | 19.175  | 9.425    | 0.508474576 | 0.001623   | 1.963  |
| 97138_at   | 130    | 147.5  | 129    | 237.2  | 139.8   | 206.4  | 99.8   | 282.2  | 0.67505535  | 160.925  | 182.05  | 21.125   | 0.88396045  | 0.7714     | -1.085 |
| 97139_at   | 41.4   | 55.1   | 59.7   | 58.8   | 67.4    | 36.6   | 55.7   | 50.6   | 0.883831858 | 53.75    | 52.575  | 1.175    | 1.022349025 | 0.8254     | -1.036 |
| 97140_at   | 77.5   | 63.9   | 60.9   | 67.2   | 42.4    | 74.3   | 45.5   | 109    | 0.980216451 | 67.375   | 67.8    | 0.425    | 0.993731563 | 0.7843     | -1.067 |
| 97141_s_at | 22.3   | 9.8    | 31.9   | 32.4   | 43.7    | 36.1   | 14.2   | 13.9   | 0.768537286 | 24.1     | 26.975  | 2.875    | 0.893419833 | 0.8491     | -1.086 |
| 97142_at   | 119    | 152    | 140.3  | 178.6  | 149.4   | 232.6  | 116.1  | 152.1  | 0.612407587 | 147.475  | 162.55  | 15.075   | 0.907259305 | 0.6661     | -1.079 |
| 97143_at   | 53.6   | 73.4   | 88.7   | 73.1   | 55.9    | 77.5   | 61.5   | 75.3   | 0.621964969 | 72.2     | 67.55   | 4.65     | 1.068837898 | 0.6616     | -1.062 |
| 97144_at   | 10.1   | 9.2    | 8.9    | 25.5   | 7.2     | 5.5    | 10.1   | 18     | 0.537207887 | 13.425   | 10.2    | 3.225    | 1.316176471 | 0.4862     | -1.305 |
| 97145_at   | 192.1  | 197.3  | 286.5  | 192.7  | 228.1   | 223.1  | 245.4  | 255.6  | 0.443607385 | 217.15   | 238.05  | 20.9     | 0.912203319 | 0.343      | 1.111  |
| 97146_g_at | 33.2   | 68.1   | 62.5   | 52.3   | 33.3    | 27.5   | 35.6   | 74.3   | 0.42443298  | 54.025   | 42.675  | 11.35    | 1.265963679 | 0.3429     | -1.321 |
| 97147_at   | 5.3    | 8      | 6.3    | 4.7    | 16.7    | 27.2   | 4.2    | 24.9   | 0.099797164 | 6.075    | 18.25   | 12.175   | 0.332876712 | 0.08806    | 2.485  |
| 97148_at   | 61.5   | 89.3   | 107.8  | 70.9   | 75      | 135.2  | 92.5   | 126.7  | 0.208331596 | 82.375   | 107.35  | 24.975   | 0.76734979  | 0.2101     | 1.297  |
| 97149_at   | 105    | 96.8   | 121.1  | 71.9   | 136.1   | 61.4   | 67.7   | 57.5   | 0.437334699 | 98.7     | 80.675  | 18.025   | 1.223427332 | 0.3134     | -1.284 |
| 97150_at   | 1.2    | 3      | 2.4    | 13.3   | 2.1     | 0.6    | 2.3    | 12.8   | 0.899022636 | 4.975    | 4.45    | 0.525    | 1.117977528 | 0.755      | -1.3   |
| 97151_at   | 378.1  | 485.3  | 571.8  | 534.1  | 776.1   | 453.2  | 549.9  | 396.8  | 0.607349417 | 492.325  | 544     | 51.675   | 0.905009191 | 0.6632     | -1.082 |
| 97152_at   | 5.1    | 1.4    | 3.2    | 5.7    | 3       | 2.6    | 2.9    | 4.3    | 0.568742078 | 3.85     | 3.2     | 0.65     | 1.203125    | 0.8192     | -1.083 |
| 97153_at   | 16.7   | 14.6   | 30.2   | 21     | 22.2    | 42.5   | 13     | 22.1   | 0.572289175 | 20.625   | 24.95   | 4.325    | 0.826653307 | 0.6466     | 1.15   |
| 97154_f_at | 271.9  | 164.2  | 196.6  | 245.1  | 188.7   | 265.8  | 269.6  | 305.7  | 0.312504671 | 219.45   | 257.45  | 38       | 0.852398524 | 0.3275     | 1.177  |
| 97155_at   | 40     | 40.5   | 13.3   | 33.2   | 48.6    | 26.3   | 14.3   | 57.3   | 0.695564559 | 31.75    | 36.625  | 4.875    | 0.866894198 | 0.8272     | -1.099 |
| 97156_at   | 28.2   | 86.8   | 109.6  | 77.4   | 87.2    | 72.7   | 116.5  | 64.7   | 0.654307047 | 75.5     | 85.275  | 9.775    | 0.885370859 | 0.5464     | 1.232  |
| 97157_at   | 221.6  | 187.7  | 216.7  | 239.9  | 75.7    | 61.1   | 53.8   | 56.8   | 0.000156483 | 216.475  | 61.85   | 154.625  | 3.5         | 0.00000882 | -3.517 |
| 97158_at   | 270.1  | 523.1  | 353.7  | 414.7  | 513.7   | 458.1  | 477.1  | 479.6  | 0.182967722 | 390.4    | 482.125 | 91.725   | 0.809748509 | 0.1412     | 1.27   |
| 97159_at   | 129.5  | 53.6   | 121.6  | 135.6  | 197     | 126.4  | 100.5  | 129.1  | 0.354408003 | 110.075  | 138.25  | 28.175   | 0.796202532 | 0.3588     | 1.296  |
| 97160_at   | 7793.5 | 8267.9 | 7804.9 | 7034.2 | 10422.4 | 7780.8 | 9252.6 | 7815.8 | 0.186716574 | 7725.125 | 8817.9  | 1092.775 | 0.876073101 | 0.1582     | 1.135  |
| 97161_at   | 38.5   | 46.2   | 23.2   | 38.5   | 20.6    | 43.5   | 41.7   | 52.1   | 0.740375169 | 36.6     | 39.475  | 2.875    | 0.927169094 | 0.8456     | -1.053 |
| 97162_at   | 18.8   | 4.9    | 22.9   | 5      | 5.5     | 8.3    | 22.5   | 8      | 0.773633277 | 12.9     | 11.075  | 1.825    | 1.164785553 | 0.9086     | -1.064 |
| 97163_g_at | 303.7  | 546.7  | 434.5  | 509.9  | 459.6   | 482.2  | 477.6  | 520.7  | 0.552985741 | 448.7    | 485.025 | 36.325   | 0.925106953 | 0.4784     | 1.106  |
| 97164_at   | 1273.4 | 1031.8 | 1154   | 1060.1 | 1124    | 915.6  | 910    | 1203.2 | 0.36133602  | 1129.825 | 1038.2  | 91.625   | 1.088253708 | 0.3397     | -1.093 |
| 97165_r_at | 23.4   | 53.9   | 71.8   | 65.3   | 107.9   | 59.2   | 65.1   | 113.6  | 0.117028998 | 53.6     | 86.45   | 32.85    | 0.620011567 | 0.141      | 1.68   |
| 97166_at   | 148    | 185.8  | 176    | 193.3  | 157.2   | 214.6  | 194.4  | 264.6  | 0.260085019 | 175.775  | 207.7   | 31.925   | 0.84629273  | 0.2564     | 1.167  |
| 97167_g_at | 767.6  | 796.7  | 912.3  | 874    | 797.7   | 851.8  | 810.8  | 829.1  | 0.690317086 | 837.65   | 822.35  | 15.3     | 1.018605217 | 0.7134     | -1.016 |
| 97168_at   | 4.1    | 8.4    | 4.6    | 7.1    | 10.4    | 11     | 11     | 6.1    | 0.063170448 | 6.05     | 9.625   | 3.575    | 0.628571429 | 0.07692    | 1.617  |
| 97169_f_at | 18.1   | 33.2   | 25.2   | 59.7   | 8.2     | 34.8   | 31.2   | 40.8   | 0.663424813 | 34.05    | 28.75   | 5.3      | 1.184347826 | 0.6276     | -1.257 |
| 97170_at   | 3.2    | 3.5    | 21.9   | 0.9    | 2.3     | 4.1    | 2.1    | 3.9    | 0.446216495 | 7.375    | 3.1     | 4.275    | 2.379032258 | 0.6897     | -1.325 |
| 97171_f_at | 1686.6 | 1624.3 | 1785.2 | 2038.1 | 1586.6  | 2011.8 | 1874.2 | 1694.6 | 0.951876008 | 1783.55  | 1791.8  | 8.25     | 0.995395691 | 0.9557     | -1.004 |
| 97172_s_at | 190.1  | 127.5  | 172.1  | 112.1  | 100     | 190.6  | 123.2  | 148.7  | 0.725565812 | 150.45   | 140.625 | 9.825    | 1.069866667 | 0.7069     | -1.076 |
| 97173_f_at | 22.3   | 60.2   | 10.5   | 49.1   | 14.5    | 87.6   | 49.3   | 44.2   | 0.507916045 | 35.525   | 48.9    | 13.375   | 0.726482618 | 0.5499     | 1.414  |
| 97174_r_at | 55.8   | 61     | 56     | 58.7   | 58      | 65     | 43.9   | 64.5   | 0.996341527 | 57.875   | 57.85   | 0.025    | 1.000432152 | 0.9006     | -1.012 |
| 97175_at   | 85.1   | 34.3   | 106.5  | 22.7   | 35.2    | 55.4   | 52.9   | 32.3   | 0.439452237 | 62.15    | 43.95   | 18.2     | 1.41410694  | 0.6484     | -1.207 |
| 97176_at   | 175.8  | 186.2  | 302.7  | 270.7  | 249.3   | 247.4  | 291.7  | 287.6  | 0.355081128 | 233.85   | 269     | 35.15    | 0.869330855 | 0.2912     | 1.179  |
| 97177_at   | 17.1   | 13.3   | 20.1   | 6.7    | 41.7    | 23.7   | 5      | 31.7   | 0.250356333 | 14.3     | 25.525  | 11.225   | 0.560235064 | 0.4775     | 1.499  |
| 97178_at   | 172.6  | 197.4  | 267    | 242.9  | 180.1   | 245.2  | 182.9  | 212    | 0.592327535 | 219.975  | 205.05  | 14.925   | 1.072787125 | 0.6208     | -1.066 |
| 97179_at   | 394.1  | 391    | 430    | 364    | 363     | 377.1  | 347.8  | 363.3  | 0.09489119  | 394.775  | 362.8   | 31.975   | 1.088133958 | 0.07087    | -1.087 |
| 97180_f_at | 63.7   | 78.8   | 66.2   | 39.4   | 46.8    | 21     | 68     | 77.6   | 0.587664456 | 62.025   | 53.35   | 8.675    | 1.162605436 | 0.509      | -1.26  |
| 97181_f_at | 5496.1 | 4718.9 | 4248.6 | 4436.7 | 4090.7  | 4967.1 | 4828.8 | 5691   | 0.706263489 | 4725.075 | 4894.4  | 169.325  | 0.96540434  | 0.7193     | -1.034 |
| 97182_at   | 76.2   | 50     | 65.8   | 61.1   | 44.4    | 46.2   | 28.3   | 60.1   | 0.073036154 | 63.275   | 44.75   | 18.525   | 1.41396648  | 0.0848     | -1.448 |
| 97184_at   | 199.8  | 165.6  | 191.8  | 212.1  | 150.4   | 215.8  | 209.7  | 194.8  | 0.984993074 | 192.325  | 192.675 | 0.35     | 0.99818347  | 0.9681     | -1.004 |
| 97185_at   | 7      | 20.4   | 29.1   | 40.7   | 28.5    | 31.9   | 41.8   | 31.5   | 0.300749948 | 24.3     | 33.425  | 9.125    | 0.727000748 | 0.2565     | 1.628  |
| 97186_s_at | 96.9   | 26.9   | 22.2   | 42     | 125.9   | 114.1  | 136.5  | 143.4  | 0.011770762 | 47       | 129.975 | 82.975   | 0.361608002 | 0.01164    | 3.28   |



|            |        |        |        |        |        |        |        |        |             |          |          |         |             |          |        |
|------------|--------|--------|--------|--------|--------|--------|--------|--------|-------------|----------|----------|---------|-------------|----------|--------|
| 97187_at   | 35.4   | 44.5   | 46.6   | 39.2   | 34.9   | 37.9   | 42.9   | 49.6   | 0.981360826 | 41.425   | 41.325   | 0.1     | 1.002419843 | 0.963    | -1.005 |
| 97188_at   | 4.8    | 5.4    | 7.5    | 16.5   | 5.1    | 9.6    | 8.8    | 16     | 0.720977519 | 8.55     | 9.875    | 1.325   | 0.865822785 | 0.6192   | 1.211  |
| 97189_at   | 3.4    | 6.9    | 3.6    | 4      | 2.1    | 3.4    | 5.3    | 4.1    | 0.505432441 | 4.475    | 3.725    | 0.75    | 1.201342282 | 0.4531   | -1.226 |
| 97190_f_at | 7.7    | 12.8   | 19.6   | 6.9    | 4.3    | 22.6   | 5.6    | 13.1   | 0.948018989 | 11.75    | 11.4     | 0.35    | 1.030701754 | 0.7409   | -1.169 |
| 97191_at   | 3.3    | 5.1    | 4.8    | 3      | 9.1    | 2.8    | 4.5    | 3.2    | 0.611787566 | 4.05     | 4.9      | 0.85    | 0.826530612 | 0.7539   | -1.103 |
| 97192_at   | 7.8    | 18.2   | 14.9   | 10.4   | 21.3   | 23.6   | 41.7   | 42.8   | 0.034941255 | 12.825   | 32.35    | 19.525  | 0.396445131 | 0.01265  | 2.527  |
| 97193_at   | 96     | 126.1  | 140.3  | 113.6  | 135.3  | 99.5   | 111.6  | 87.5   | 0.477203302 | 119      | 108.475  | 10.525  | 1.097026965 | 0.4641   | -1.101 |
| 97194_at   | 6.1    | 6.3    | 7.9    | 9.6    | 11.2   | 6.9    | 14.2   | 17.3   | 0.109058258 | 7.475    | 12.4     | 4.925   | 0.602822581 | 0.08018  | 1.604  |
| 97195_at   | 74.6   | 121.3  | 144    | 100    | 131.8  | 149.6  | 138.1  | 110.2  | 0.246669117 | 109.975  | 132.425  | 22.45   | 0.830470077 | 0.2272   | 1.232  |
| 97196_at   | 2.7    | 4.2    | 2.6    | 3.5    | 10.9   | 4.5    | 16.7   | 7.1    | 0.088528967 | 3.25     | 9.8      | 6.55    | 0.331632653 | 0.01601  | 2.745  |
| 97197_r_at | 724.2  | 671.9  | 968.5  | 672.2  | 887.5  | 986.7  | 588.8  | 545.7  | 0.958944505 | 759.2    | 752.175  | 7.025   | 1.009339582 | 0.8679   | -1.03  |
| 97198_at   | 427.5  | 365.7  | 440.3  | 449.7  | 375.1  | 528.3  | 384.6  | 359.8  | 0.847833231 | 420.8    | 411.95   | 8.85    | 1.02148319  | 0.7713   | -1.031 |
| 97199_at   | 804.7  | 745.8  | 584.5  | 800.1  | 477.4  | 737    | 763.9  | 625.2  | 0.358766668 | 733.775  | 650.875  | 82.9    | 1.127367006 | 0.3649   | -1.137 |
| 97200_f_at | 6143.3 | 5320.2 | 5341.4 | 6222.1 | 6374.7 | 5093.1 | 5369   | 6094.9 | 0.953199367 | 5756.75  | 5732.925 | 23.825  | 1.004155819 | 0.9374   | -1.006 |
| 97201_s_at | 4987.3 | 3981.3 | 3500.7 | 3170.5 | 4955   | 3741.3 | 3940.9 | 3257.1 | 0.908950638 | 3909.95  | 3973.575 | 63.625  | 0.983987971 | 0.8886   | -1.019 |
| 97203_at   | 2936.7 | 3411.4 | 3514.2 | 3122.1 | 2915.3 | 3861.5 | 3407.7 | 3019.2 | 0.836594036 | 3246.1   | 3300.925 | 54.825  | 0.983391019 | 0.8691   | -1.013 |
| 97204_s_at | 1050.9 | 1044.5 | 869.7  | 764.3  | 1685.2 | 852.1  | 936.5  | 811.3  | 0.561144698 | 932.35   | 1071.275 | 138.925 | 0.870318079 | 0.6082   | -1.106 |
| 97205_at   | 1150.2 | 1456   | 1195.9 | 1631.3 | 1434.4 | 1125.7 | 1449.4 | 1599.2 | 0.781050569 | 1358.35  | 1402.175 | 43.825  | 0.968744985 | 0.7707   | -1.035 |
| 97206_at   | 129    | 105.1  | 82.5   | 93.5   | 78.4   | 154.4  | 102.3  | 67.5   | 0.935008761 | 102.525  | 100.65   | 1.875   | 1.018628912 | 0.7941   | -1.057 |
| 97207_f_at | 520.1  | 764.4  | 630.4  | 822.6  | 830.4  | 630    | 699    | 748.6  | 0.616839106 | 684.375  | 727      | 42.625  | 0.941368638 | 0.571    | -1.073 |
| 97208_at   | 385.6  | 367.9  | 499.5  | 385    | 427.5  | 369.7  | 461.3  | 348.1  | 0.850716926 | 409.5    | 401.65   | 7.85    | 1.019544379 | 0.8553   | -1.018 |
| 97210_at   | 754.1  | 569.5  | 731    | 541.5  | 669.6  | 777.1  | 555.9  | 579.7  | 0.9643895   | 649.025  | 645.575  | 3.45    | 1.005344073 | 0.9767   | -1.003 |
| 97211_at   | 2263   | 2612   | 2818.2 | 2878.3 | 2366.3 | 2642.7 | 2953.6 | 2721.5 | 0.883683046 | 2642.875 | 2671.025 | 28.15   | 0.989460975 | 0.8738   | -1.012 |
| 97213_at   | 61.5   | 72.2   | 54.4   | 11.8   | 88.2   | 55.3   | 53     | 13.3   | 0.906815937 | 49.975   | 52.45    | 2.475   | 0.952812202 | 0.9397   | -1.047 |
| 97216_at   | 64.3   | 47.4   | 69.3   | 32.6   | 74.2   | 44.3   | 41.5   | 40.3   | 0.784685281 | 53.4     | 50.075   | 3.325   | 1.066400399 | 0.8099   | -1.058 |
| 97217_at   | 2752.4 | 3314.7 | 3117.3 | 3240.4 | 3032.5 | 3385.3 | 3725.8 | 3289.8 | 0.233711222 | 3106.2   | 3358.35  | 252.15  | 0.924918487 | 0.2379   | -1.081 |
| 97220_at   | 984.5  | 881.5  | 1014.5 | 1035.3 | 1087.2 | 866.6  | 953.4  | 1089.1 | 0.766500036 | 978.95   | 999.075  | 20.125  | 0.979856367 | 0.7978   | -1.018 |
| 97222_at   | 327.5  | 334.1  | 645.4  | 441    | 485.7  | 449.5  | 335    | 481.2  | 0.992204656 | 437      | 437.85   | 0.85    | 0.998058696 | 0.8716   | -1.031 |
| 97224_at   | 431.7  | 437.7  | 393.9  | 567.4  | 353.3  | 394.1  | 427.4  | 488.7  | 0.414556464 | 457.675  | 415.875  | 41.8    | 1.100510971 | 0.4043   | -1.098 |
| 97226_at   | 859.4  | 1766.7 | 1246.4 | 1253.8 | 1108.6 | 939.1  | 924.5  | 885.7  | 0.186844315 | 1281.575 | 964.475  | 317.1   | 1.328779906 | 0.1502   | -1.292 |
| 97227_at   | 253.7  | 432.8  | 365.4  | 448.2  | 204.4  | 332.3  | 216.4  | 273.3  | 0.074017351 | 375.025  | 256.6    | 118.425 | 1.461515978 | 0.07181  | -1.454 |
| 97228_at   | 699.1  | 663    | 784.9  | 588.2  | 595.5  | 636.1  | 615.4  | 574.3  | 0.149068715 | 683.8    | 605.325  | 78.475  | 1.129641102 | 0.1154   | -1.124 |
| 97229_at   | 4018.6 | 3159.2 | 3548.3 | 3204.9 | 4329.6 | 3163.9 | 3944.9 | 3905.5 | 0.305668341 | 3482.75  | 3835.975 | 353.225 | 0.907917804 | 0.3147   | 1.1    |
| 97232_at   | 39.6   | 21.5   | 12.5   | 53.2   | 53.2   | 53.4   | 26.1   | 40.4   | 0.344761141 | 31.7     | 43.275   | 11.575  | 0.732524552 | 0.2959   | 1.516  |
| 97234_at   | 114.9  | 129.9  | 155.9  | 224.1  | 163.8  | 151.9  | 131.4  | 134.8  | 0.696106345 | 156.2    | 145.475  | 10.725  | 1.073724008 | 0.7951   | -1.043 |
| 97235_f_at | 0.8    | 2.5    | 3.1    | 1.9    | 3.7    | 2.2    | 1.4    | 4.9    | 0.337685978 | 2.075    | 3.05     | 0.975   | 0.680327869 | 0.3762   | 1.483  |
| 97236_r_at | 41.2   | 61.5   | 80.9   | 86.7   | 123.9  | 82.1   | 82.3   | 55.4   | 0.338508897 | 67.575   | 85.925   | 18.35   | 0.786441664 | 0.3483   | 1.271  |
| 97237_at   | 1211.4 | 1017.1 | 1097.5 | 1113.5 | 1163.1 | 1065.8 | 971.2  | 1038   | 0.40603841  | 1109.875 | 1059.525 | 50.35   | 1.047521295 | 0.4019   | -1.048 |
| 97238_at   | 274.7  | 334.1  | 244.3  | 280.7  | 248.2  | 294.4  | 252    | 216.4  | 0.259492386 | 283.45   | 252.75   | 30.7    | 1.121463897 | 0.2521   | -1.121 |
| 97239_at   | 90.6   | 98.2   | 87.1   | 82.3   | 109.7  | 117.4  | 83.7   | 81.1   | 0.438246265 | 89.55    | 97.975   | 8.425   | 0.914008676 | 0.4626   | -1.082 |
| 97240_g_at | 2676.1 | 2811.8 | 3118.3 | 2731.7 | 2775.8 | 2929.6 | 3256.9 | 2605.7 | 0.747774387 | 2834.475 | 2892     | 57.525  | 0.980108921 | 0.7619   | -1.019 |
| 97241_at   | 1197.9 | 1208.6 | 1034.3 | 1262.5 | 730.5  | 1056.9 | 833.9  | 1162.3 | 0.100246849 | 1175.825 | 945.9    | 229.925 | 1.243075378 | 0.09074  | -1.261 |
| 97242_at   | 582.5  | 584.7  | 645.4  | 575.8  | 673.6  | 560.3  | 618.8  | 550    | 0.917945204 | 597.1    | 600.675  | 3.575   | 0.994048362 | 0.9479   | -1.004 |
| 97243_at   | 993.7  | 951.2  | 1002.2 | 703.5  | 704.7  | 852.5  | 788    | 702.6  | 0.122695247 | 912.65   | 761.95   | 150.7   | 1.197782007 | 0.1214   | -1.19  |
| 97247_at   | 2196   | 1658.1 | 2057.4 | 1288.2 | 1817.5 | 2331.9 | 1920.7 | 1512.1 | 0.732003606 | 1799.925 | 1895.55  | 95.625  | 0.9495529   | 0.699    | -1.063 |
| 97248_at   | 4016.7 | 3062.6 | 3508.2 | 3509.7 | 2742.2 | 2463   | 3005.1 | 2637.7 | 0.016516504 | 3524.3   | 2712     | 812.3   | 1.299520649 | 0.009414 | -1.297 |
| 97249_at   | 591.4  | 934.7  | 658.6  | 615.8  | 947.5  | 674.2  | 762.6  | 740.1  | 0.445819548 | 700.125  | 781.1    | 80.975  | 0.896332096 | 0.3851   | 1.126  |
| 97250_at   | 5060.8 | 4568.9 | 5330.3 | 3709.9 | 6075.3 | 4056   | 5429.9 | 3211.4 | 0.973768538 | 4667.475 | 4693.15  | 25.675  | 0.994529261 | 0.9279   | -1.016 |
| 97251_at   | 562.3  | 546.5  | 327.3  | 351.2  | 444.6  | 413.1  | 293.6  | 461.1  | 0.57537049  | 446.825  | 403.1    | 43.725  | 1.108471843 | 0.6358   | -1.092 |
| 97252_at   | 796.7  | 998.2  | 754.9  | 811.2  | 637.5  | 732.5  | 563.3  | 846.6  | 0.126314193 | 840.25   | 694.975  | 145.275 | 1.209036296 | 0.1178   | -1.216 |
| 97253_at   | 337.1  | 279.1  | 283.1  | 270.2  | 329.4  | 315.5  | 288.6  | 205.3  | 0.818748412 | 292.375  | 284.7    | 7.675   | 1.026958202 | 0.753    | -1.04  |
| 97254_at   | 2334   | 2144.5 | 2287.7 | 2059.8 | 2077.3 | 1947.8 | 2121.9 | 1947.2 | 0.061254586 | 2206.5   | 2023.55  | 182.95  | 1.090410417 | 0.05572  | -1.09  |
| 97255_at   | 1151.3 | 1065.4 | 1103.2 | 1221.3 | 756    | 1017.9 | 810.9  | 1116.2 | 0.084623339 | 1135.3   | 925.25   | 210.05  | 1.227019724 | 0.06699  | -1.241 |
| 97256_at   | 14     | 35.1   | 22.9   | 46     | 30.6   | 15     | 22     | 33.1   | 0.618111862 | 29.5     | 25.175   | 4.325   | 1.171797418 | 0.7417   | -1.115 |
| 97257_at   | 73.9   | 81.7   | 117.6  | 110.3  | 54.5   | 131.2  | 83.9   | 109.8  | 0.960471702 | 95.875   | 94.85    | 1.025   | 1.010806537 | 0.8518   | -1.044 |
| 97258_at   | 71.7   | 50.2   | 60.1   | 48.4   | 67     | 90.8   | 43.7   | 49     | 0.692683626 | 57.6     | 62.625   | 5.025   | 0.919760479 | 0.7841   | -1.055 |



|            |        |        |        |        |        |        |        |        |             |          |          |          |             |          |        |
|------------|--------|--------|--------|--------|--------|--------|--------|--------|-------------|----------|----------|----------|-------------|----------|--------|
| 97259_at   | 588.5  | 405.4  | 495.8  | 539.7  | 390.9  | 426    | 374    | 359.2  | 0.047365222 | 507.35   | 387.525  | 119.825  | 1.309205858 | 0.02436  | -1.3   |
| 97260_at   | 951.4  | 663.3  | 559.1  | 570.8  | 263.8  | 690.8  | 671.8  | 400.1  | 0.24484252  | 686.15   | 506.625  | 179.525  | 1.354354799 | 0.2243   | -1.424 |
| 97261_at   | 3535.5 | 2951.6 | 3322.3 | 2768.7 | 2911   | 3034.9 | 3080.6 | 3039.3 | 0.519295951 | 3144.525 | 3016.45  | 128.075  | 1.042458851 | 0.5362   | -1.038 |
| 97262_at   | 1504   | 1947.2 | 1721   | 1657.9 | 1549.5 | 1875   | 1830.6 | 1921.8 | 0.51194817  | 1707.525 | 1794.225 | 86.7     | 0.951678301 | 0.5123   | -1.052 |
| 97263_s_at | 1330.6 | 1773.3 | 1848.8 | 1647   | 1197.5 | 2010.5 | 1475.3 | 1505   | 0.634946816 | 1649.925 | 1547.075 | 102.85   | 1.066480293 | 0.588    | -1.077 |
| 97264_r_at | 278.8  | 288.3  | 388.8  | 265.9  | 218.7  | 414.7  | 211.4  | 309.6  | 0.77320135  | 305.45   | 288.6    | 16.85    | 1.058385308 | 0.6585   | -1.088 |
| 97265_at   | 1855   | 1867.6 | 1932.2 | 1679.1 | 2111.7 | 1482.8 | 1503.1 | 1427.8 | 0.305081002 | 1833.475 | 1631.35  | 202.125  | 1.123900451 | 0.2284   | -1.137 |
| 97267_at   | 439.8  | 376.2  | 440.2  | 366.7  | 294.7  | 382.9  | 424.4  | 375.7  | 0.32543474  | 405.725  | 369.425  | 36.3     | 1.098260811 | 0.3221   | -1.104 |
| 97268_i_at | 3273.6 | 2280.6 | 2628.7 | 2072.2 | 2110.6 | 2655.3 | 2248.9 | 2433.2 | 0.521079786 | 2563.775 | 2362     | 201.775  | 1.085425487 | 0.5486   | -1.073 |
| 97269_f_at | 3643.5 | 2566.8 | 3195.5 | 2554.4 | 2648.1 | 2890   | 2639.3 | 2857.3 | 0.451862367 | 2990.05  | 2758.675 | 231.375  | 1.083871786 | 0.4685   | -1.072 |
| 97270_at   | 33.2   | 95.3   | 48     | 92.6   | 46.6   | 85.2   | 101.6  | 90.7   | 0.514028715 | 67.275   | 81.025   | 13.75    | 0.83029929  | 0.4734   | 1.269  |
| 97271_at   | 1132.9 | 1041.9 | 1055.6 | 978.4  | 1382.6 | 863.9  | 1064.4 | 846    | 0.925361334 | 1052.2   | 1039.225 | 12.975   | 1.012485265 | 0.7997   | -1.032 |
| 97272_at   | 908    | 1009.1 | 1212.1 | 1279.7 | 1032.3 | 613    | 550.7  | 1387.7 | 0.38804432  | 1102.225 | 895.925  | 206.3    | 1.23026481  | 0.2902   | -1.309 |
| 97273_at   | 593.6  | 790.3  | 837    | 659.4  | 730.6  | 744.8  | 761.3  | 696.8  | 0.832260142 | 720.075  | 733.375  | 13.3     | 0.981864667 | 0.7507   | -1.028 |
| 97274_at   | 2008.5 | 1572.9 | 1753.2 | 1851.5 | 1491   | 1682.3 | 1623.9 | 1355.8 | 0.071049946 | 1796.525 | 1538.25  | 258.275  | 1.167901837 | 0.07008  | -1.167 |
| 97276_at   | 503.7  | 462.7  | 479    | 404.4  | 594.9  | 359.8  | 414.4  | 413.1  | 0.776172182 | 462.45   | 445.55   | 16.9     | 1.037930648 | 0.6721   | -1.054 |
| 97277_at   | 440    | 370.6  | 468.4  | 460.4  | 441.7  | 451.4  | 501.2  | 479.4  | 0.254041349 | 434.85   | 468.425  | 33.575   | 0.928323638 | 0.2509   | -1.08  |
| 97278_at   | 14.8   | 12.7   | 7      | 18.2   | 13.1   | 15.8   | 20.8   | 9.1    | 0.669397692 | 13.175   | 14.7     | 1.525    | 0.896258503 | 0.6583   | 1.134  |
| 97279_at   | 725.2  | 1208.6 | 1002.5 | 1040.7 | 894.6  | 1113.1 | 842.8  | 836.1  | 0.569415378 | 994.25   | 921.65   | 72.6     | 1.078771768 | 0.6198   | -1.068 |
| 97281_at   | 46     | 47.6   | 65.2   | 40.9   | 62.2   | 35.1   | 26.3   | 48.4   | 0.495612019 | 49.925   | 43       | 6.925    | 1.161046512 | 0.4169   | -1.203 |
| 97282_at   | 91.2   | 104.4  | 87.9   | 112.2  | 101.4  | 64.6   | 91.7   | 86     | 0.230428774 | 98.925   | 85.925   | 13       | 1.151294734 | 0.2324   | -1.161 |
| 97283_at   | 17.4   | 3      | 3.7    | 21.2   | 111.3  | 159.4  | 160.5  | 118.4  | 0.001102202 | 11.325   | 137.4    | 126.075  | 0.082423581 | 0.001589 | 16.95  |
| 97284_at   | 652.3  | 803.9  | 807.4  | 943.4  | 760.2  | 831.4  | 824.6  | 798.9  | 0.975598523 | 801.75   | 803.775  | 2.025    | 0.997480638 | 0.8993   | -1.01  |
| 97285_f_at | 245.9  | 327.6  | 297.1  | 315.9  | 331.2  | 293.9  | 328.2  | 281    | 0.607973065 | 296.625  | 308.575  | 11.95    | 0.961273596 | 0.5922   | -1.044 |
| 97287_at   | 4      | 3.9    | 4.3    | 7      | 5.5    | 5.8    | 7.6    | 4      | 0.40985121  | 4.8      | 5.725    | 0.925    | 0.838427948 | 0.3692   | 1.203  |
| 97288_at   | 4.1    | 9.3    | 2.1    | 4.1    | 4.3    | 4.9    | 3.8    | 5.1    | 0.825474124 | 4.9      | 4.525    | 0.375    | 1.082872928 | 0.8556   | -1.061 |
| 97292_at   | 2919   | 2203.2 | 2464.9 | 2373.5 | 1697.9 | 2361.2 | 2048.4 | 2001.4 | 0.064787317 | 2490.15  | 2027.225 | 462.925  | 1.228354031 | 0.06114  | -1.23  |
| 97293_at   | 535.9  | 543.1  | 477.2  | 594.1  | 366.8  | 459.1  | 471.9  | 419.4  | 0.018174313 | 537.575  | 429.3    | 108.275  | 1.252212905 | 0.02033  | -1.254 |
| 97295_at   | 983.7  | 979.8  | 955.3  | 967.4  | 771.2  | 993    | 966.8  | 781.5  | 0.211672623 | 971.55   | 878.125  | 93.425   | 1.106391459 | 0.1628   | -1.114 |
| 97296_at   | 800.2  | 636    | 618.9  | 550.2  | 677.1  | 684.5  | 626.4  | 506.4  | 0.694578291 | 651.325  | 623.6    | 27.725   | 1.044459589 | 0.7086   | -1.042 |
| 97297_at   | 188    | 318.4  | 212.1  | 251.5  | 459    | 409.3  | 407.3  | 348.6  | 0.004651218 | 242.5    | 406.05   | 163.55   | 0.597217091 | 0.005924 | 1.7    |
| 97300_at   | 5.6    | 10.8   | 16.8   | 7.4    | 7.9    | 16.1   | 23.3   | 8.5    | 0.424284168 | 10.15    | 13.95    | 3.8      | 0.727598566 | 0.4223   | 1.354  |
| 97301_at   | 2432.9 | 2454.8 | 2420.4 | 2624.8 | 2156.5 | 2124.4 | 2043.2 | 2129.1 | 0.001522819 | 2483.225 | 2113.3   | 369.925  | 1.175046136 | 0.00035  | -1.175 |
| 97302_at   | 1606.5 | 1604   | 1449.5 | 1797.9 | 1359.1 | 1658.5 | 1585.8 | 1599.1 | 0.535016324 | 1614.475 | 1550.625 | 63.85    | 1.041176945 | 0.5417   | -1.041 |
| 97304_at   | 559.9  | 806    | 728.4  | 755.8  | 425.2  | 1147.7 | 743.8  | 1224.6 | 0.429384158 | 712.525  | 885.325  | 172.8    | 0.80481744  | 0.5919   | 1.156  |
| 97305_at   | 919.9  | 700.9  | 900.5  | 830    | 847.1  | 711.9  | 867.6  | 757.5  | 0.525733792 | 837.825  | 796.025  | 41.8     | 1.052510914 | 0.5508   | -1.05  |
| 97307_f_at | 8659.2 | 7401.3 | 7538.6 | 7709.8 | 8953.9 | 7063.6 | 8517.3 | 7252.9 | 0.835073894 | 7827.225 | 7946.925 | 119.7    | 0.98493757  | 0.8674   | -1.012 |
| 97308_at   | 528    | 552.8  | 550    | 536.6  | 720.5  | 551.4  | 640    | 572.1  | 0.128816535 | 541.85   | 621      | 79.15    | 0.872544283 | 0.07657  | 1.14   |
| 97309_at   | 1477.7 | 1197.7 | 1330.9 | 1330.6 | 1010.5 | 1410.7 | 1102.3 | 1032.7 | 0.133029883 | 1334.225 | 1139.05  | 195.175  | 1.171348931 | 0.11     | -1.179 |
| 97310_at   | 583.8  | 448.7  | 448.8  | 614.9  | 458.4  | 454.8  | 492.3  | 446.3  | 0.260253163 | 524.05   | 462.95   | 61.1     | 1.131979695 | 0.237    | -1.121 |
| 97311_at   | 5060.9 | 4920.4 | 5712.5 | 4250.6 | 4989.4 | 4555.1 | 4699.9 | 4330.3 | 0.355294673 | 4986.1   | 4643.675 | 342.425  | 1.073740087 | 0.3596   | -1.069 |
| 97312_at   | 7614.9 | 6129.6 | 5626.3 | 5605   | 3268.3 | 7172.7 | 4880.3 | 5150   | 0.281557069 | 6243.95  | 5117.825 | 1126.125 | 1.220039763 | 0.2421   | -1.257 |
| 97313_at   | 1000.2 | 1158.2 | 1227.6 | 1096.7 | 732.8  | 1331.4 | 1240.1 | 1158.1 | 0.973093613 | 1120.675 | 1115.6   | 5.075    | 1.004549122 | 0.8561   | -1.027 |
| 97315_at   | 1446.3 | 1226.8 | 1368.3 | 1116.7 | 1368   | 1225.7 | 1244.5 | 1195.4 | 0.723365318 | 1289.525 | 1258.4   | 31.125   | 1.024733789 | 0.7579   | -1.021 |
| 97316_at   | 23.7   | 21.4   | 5      | 24.5   | 17.3   | 27.1   | 16.8   | 9.7    | 0.879310769 | 18.65    | 17.725   | 0.925    | 1.052186178 | 0.9069   | -1.055 |
| 97317_at   | 744.5  | 462.5  | 564    | 674.2  | 206.3  | 299.2  | 243.6  | 297.1  | 0.007117059 | 611.3    | 261.55   | 349.75   | 2.337220417 | 0.000853 | -2.327 |
| 97318_at   | 724.4  | 653.5  | 541.2  | 519    | 638.3  | 652.9  | 595.3  | 661.8  | 0.617779405 | 609.525  | 637.075  | 27.55    | 0.956755484 | 0.5445   | -1.054 |
| 97319_at   | 225.1  | 301.7  | 244.2  | 250    | 207.6  | 256.6  | 191.9  | 270.8  | 0.384651184 | 255.25   | 231.725  | 23.525   | 1.1015212   | 0.3665   | -1.106 |
| 97320_at   | 136.2  | 85     | 127.6  | 117.2  | 133    | 108.8  | 109.2  | 175.3  | 0.465841505 | 116.5    | 131.575  | 15.075   | 0.885426563 | 0.4727   | 1.125  |
| 97322_at   | 5.4    | 4.9    | 3      | 3.1    | 4      | 13.4   | 2.6    | 1.4    | 0.683343236 | 4.1      | 5.35     | 1.25     | 0.76635514  | 0.9071   | -1.063 |
| 97324_at   | 280.9  | 226.4  | 189.4  | 205.5  | 369.5  | 219.1  | 214.4  | 166.4  | 0.744933407 | 225.55   | 242.35   | 16.8     | 0.93067877  | 0.8446   | -1.039 |
| 97325_at   | 251.4  | 413.4  | 364.7  | 271.8  | 396.7  | 509.8  | 404.4  | 437.1  | 0.057941772 | 325.325  | 437      | 111.675  | 0.744450801 | 0.05538  | 1.365  |
| 97327_at   | 1055.7 | 824.3  | 771.9  | 959.4  | 461.9  | 664.1  | 575    | 599.3  | 0.007481298 | 902.825  | 575.075  | 327.75   | 1.569925662 | 0.004951 | -1.571 |
| 97328_at   | 82.8   | 108.4  | 179.4  | 164    | 47.7   | 179.4  | 140.4  | 116.4  | 0.736154796 | 133.65   | 120.975  | 12.675   | 1.104773714 | 0.657    | -1.172 |
| 97329_at   | 648.9  | 832.5  | 750.1  | 703.7  | 807.1  | 637.6  | 706.7  | 690.9  | 0.674258506 | 733.8    | 710.575  | 23.225   | 1.032684798 | 0.6746   | -1.032 |
| 97330_at   | 721.3  | 1381.2 | 872.1  | 1215.7 | 1153.7 | 877.6  | 1287.6 | 1306.8 | 0.57362762  | 1047.575 | 1156.425 | 108.85   | 0.905873706 | 0.5213   | 1.127  |



|            |        |        |        |        |        |        |        |        |             |          |          |         |             |          |        |
|------------|--------|--------|--------|--------|--------|--------|--------|--------|-------------|----------|----------|---------|-------------|----------|--------|
| 97331_at   | 373.7  | 382.7  | 393.4  | 356.4  | 406.5  | 424    | 341.1  | 456.8  | 0.304702879 | 376.55   | 407.1    | 30.55   | 0.924957013 | 0.3072   | -1.076 |
| 97332_at   | 495.7  | 581.3  | 528.4  | 515.4  | 715.9  | 547.6  | 536.7  | 551.2  | 0.282267917 | 530.2    | 587.85   | 57.65   | 0.901930765 | 0.248    | -1.103 |
| 97333_at   | 893.3  | 1369.7 | 1078.8 | 1050.4 | 1511.5 | 1292   | 1903.6 | 1298   | 0.065562128 | 1098.05  | 1501.275 | 403.225 | 0.731411633 | 0.04906  | 1.366  |
| 97334_at   | 318.2  | 252.9  | 305.2  | 275.5  | 308.5  | 286.4  | 284.7  | 274.1  | 0.978151986 | 287.95   | 288.425  | 0.475   | 0.998353125 | 0.9359   | -1.005 |
| 97335_at   | 37.4   | 58.4   | 42.1   | 53.6   | 59.7   | 44.5   | 46.8   | 46.7   | 0.805426716 | 47.875   | 49.425   | 1.55    | 0.968639353 | 0.7481   | -1.042 |
| 97336_at   | 737.1  | 767.1  | 783    | 560.9  | 808.4  | 1000.1 | 957.5  | 985.5  | 0.016119295 | 712.025  | 937.875  | 225.85  | 0.759189657 | 0.02244  | 1.324  |
| 97338_at   | 18.3   | 7.9    | 21.4   | 28.3   | 45.3   | 1.4    | 19.8   | 17.1   | 0.856630086 | 18.975   | 20.9     | 1.925   | 0.907894737 | 0.6775   | -1.416 |
| 97339_at   | 382.7  | 576.9  | 471.7  | 439.2  | 508.9  | 550    | 570    | 466.1  | 0.287497602 | 467.625  | 523.75   | 56.125  | 0.892840095 | 0.2549   | 1.129  |
| 97340_at   | 363.4  | 776.6  | 532.9  | 586.9  | 443.4  | 459.9  | 586.8  | 590.4  | 0.656669804 | 564.95   | 520.125  | 44.825  | 1.086181206 | 0.7607   | -1.057 |
| 97341_at   | 704.2  | 433.3  | 651.9  | 471.8  | 506.1  | 607.4  | 548.4  | 449.6  | 0.638689585 | 565.3    | 527.875  | 37.425  | 1.070897466 | 0.7062   | -1.055 |
| 97342_at   | 2619.2 | 1937.9 | 2106.6 | 2241.2 | 2011.3 | 2057.6 | 2005.3 | 1860.6 | 0.193388536 | 2226.225 | 1983.7   | 242.525 | 1.12225891  | 0.1535   | -1.116 |
| 97343_at   | 702.8  | 1089.8 | 926.8  | 1038.8 | 895.6  | 921    | 890.2  | 1054.3 | 0.994214896 | 939.55   | 940.275  | 0.725   | 0.999228949 | 0.9125   | -1.012 |
| 97345_at   | 679.5  | 355.5  | 627    | 638.6  | 322.5  | 565.6  | 292.8  | 461.5  | 0.143657266 | 575.15   | 410.6    | 164.55  | 1.400754993 | 0.1639   | -1.408 |
| 97346_at   | 204.1  | 119.4  | 211.1  | 124.8  | 168.1  | 143.8  | 173.4  | 114.1  | 0.619356177 | 164.85   | 149.85   | 15      | 1.1001001   | 0.6973   | -1.077 |
| 97347_at   | 1361.8 | 3559.7 | 2216.4 | 2229.3 | 1813.1 | 2812.6 | 2616.8 | 2683.5 | 0.795440059 | 2341.8   | 2481.5   | 139.7   | 0.943703405 | 0.6647   | -1.106 |
| 97349_at   | 287.1  | 312.9  | 353.4  | 382.2  | 231.5  | 286.2  | 224.1  | 293.5  | 0.036229822 | 333.9    | 258.825  | 75.075  | 1.290060852 | 0.03514  | -1.292 |
| 97351_i_at | 1023.1 | 1015   | 627    | 585.4  | 831.5  | 420.5  | 388.1  | 621.1  | 0.168523971 | 812.625  | 565.3    | 247.325 | 1.437511056 | 0.1562   | -1.458 |
| 97352_f_at | 1577.3 | 1522.5 | 1247.7 | 1119.2 | 1079   | 1193.9 | 978    | 982.1  | 0.05969779  | 1366.675 | 1058.25  | 308.425 | 1.291448146 | 0.03833  | -1.283 |
| 97353_at   | 173.7  | 391    | 277.3  | 341.4  | 387.8  | 377.2  | 423.8  | 450.7  | 0.088226787 | 295.85   | 409.875  | 114.025 | 0.721805428 | 0.09054  | 1.444  |
| 97354_at   | 411.3  | 771.3  | 616.2  | 598.4  | 670.2  | 580.4  | 708.9  | 535.2  | 0.783840249 | 599.3    | 623.675  | 24.375  | 0.960917144 | 0.7033   | -1.06  |
| 97355_at   | 90.1   | 101.6  | 101.5  | 159.9  | 101.7  | 89.3   | 75.1   | 141.5  | 0.61227633  | 113.275  | 101.9    | 11.375  | 1.111629048 | 0.58     | -1.114 |
| 97356_at   | 783.9  | 828.4  | 796.8  | 553.2  | 1138.5 | 837.2  | 930.5  | 639.6  | 0.283544554 | 740.575  | 886.45   | 145.875 | 0.835439111 | 0.3046   | 1.187  |
| 97357_at   | 304.4  | 196.7  | 211.4  | 250.8  | 128.5  | 237.8  | 181.7  | 141.9  | 0.093904926 | 240.825  | 172.475  | 68.35   | 1.396289317 | 0.08399  | -1.417 |
| 97358_at   | 1088.8 | 2108.2 | 2046.1 | 2083.1 | 1297.7 | 1581   | 1829.3 | 1824   | 0.510837484 | 1831.55  | 1633     | 198.55  | 1.121586038 | 0.6393   | -1.093 |
| 97359_at   | 1281.9 | 1204.8 | 1141.7 | 1180.3 | 846.4  | 1356.6 | 1228.5 | 1016.1 | 0.489556597 | 1202.175 | 1111.9   | 90.275  | 1.081189855 | 0.4182   | -1.098 |
| 97360_at   | 242.9  | 432.4  | 288.9  | 338.8  | 469.6  | 419.1  | 429.6  | 390.1  | 0.08231491  | 325.75   | 427.1    | 101.35  | 0.762701943 | 0.06369  | 1.338  |
| 97363_at   | 772    | 679.4  | 647.7  | 569.8  | 638.7  | 562.1  | 558.7  | 446.9  | 0.091308388 | 667.225  | 551.6    | 115.625 | 1.209617476 | 0.09479  | -1.212 |
| 97364_at   | 632.3  | 336.5  | 379.9  | 358.1  | 291.6  | 363.3  | 346.1  | 291.4  | 0.232447364 | 426.7    | 323.1    | 103.6   | 1.320643764 | 0.1602   | -1.283 |
| 97365_at   | 180.8  | 191.4  | 171.8  | 186    | 164.1  | 138.3  | 178.2  | 118.5  | 0.08629484  | 182.5    | 149.775  | 32.725  | 1.218494408 | 0.06724  | -1.233 |
| 97366_at   | 324.3  | 632.2  | 536.7  | 447.8  | 774.7  | 496.1  | 697.9  | 499.9  | 0.220101618 | 485.25   | 617.15   | 131.9   | 0.786275622 | 0.2211   | 1.284  |
| 97367_at   | 128    | 185.2  | 154.4  | 163    | 163.3  | 162.5  | 190.5  | 156.8  | 0.482293916 | 157.65   | 168.275  | 10.625  | 0.936859308 | 0.4517   | -1.073 |
| 97368_at   | 331.8  | 419    | 338.3  | 352.3  | 307.2  | 405.2  | 373.1  | 363    | 0.952490154 | 360.35   | 362.125  | 1.775   | 0.995098378 | 0.9573   | -1.004 |
| 97369_g_at | 302.1  | 282.4  | 316.3  | 219    | 206.1  | 341.3  | 274.3  | 266    | 0.826829222 | 279.95   | 271.925  | 8.025   | 1.029511814 | 0.798    | -1.036 |
| 97370_at   | 718.4  | 547.3  | 703.5  | 650.9  | 658    | 648.9  | 603.8  | 708.8  | 0.997437528 | 655.025  | 654.875  | 0.15    | 1.000229051 | 0.959    | -1.004 |
| 97371_at   | 136.1  | 172.2  | 184.4  | 182.6  | 221.2  | 126.7  | 135.1  | 106.8  | 0.481597866 | 168.825  | 147.45   | 21.375  | 1.144964395 | 0.3681   | -1.182 |
| 97372_at   | 269.1  | 293.8  | 286.3  | 228.2  | 284.5  | 273.7  | 249    | 302.1  | 0.680797803 | 269.35   | 277.325  | 7.975   | 0.971243126 | 0.6683   | -1.032 |
| 97373_at   | 284    | 269.8  | 288    | 299.7  | 351.9  | 293.2  | 368    | 379.1  | 0.040720496 | 285.375  | 348.05   | 62.675  | 0.819925298 | 0.01966  | 1.214  |
| 97374_at   | 1265.7 | 1101.5 | 1191.8 | 997.3  | 1451.2 | 1119   | 1197.1 | 901.3  | 0.835353422 | 1139.075 | 1167.15  | 28.075  | 0.97594568  | 0.9043   | -1.014 |
| 97375_at   | 199.3  | 403.6  | 320    | 302.7  | 222.9  | 341.5  | 317.3  | 330.2  | 0.947938939 | 306.4    | 302.975  | 3.425   | 1.011304563 | 0.9746   | -1.006 |
| 97377_at   | 377.7  | 280.5  | 306.7  | 314.3  | 296.8  | 355.2  | 323.3  | 275.6  | 0.801205059 | 319.8    | 312.725  | 7.075   | 1.022623711 | 0.8088   | -1.021 |
| 97379_at   | 5.9    | 5      | 6.7    | 9      | 19.7   | 39.4   | 40.5   | 44.9   | 0.012319515 | 6.65     | 36.125   | 29.475  | 0.184083045 | 0.000309 | 5.287  |
| 97380_at   | 2408.7 | 2300.3 | 2449.8 | 2161.9 | 2090.5 | 2154.9 | 2190.7 | 2407.2 | 0.251858552 | 2330.175 | 2210.825 | 119.35  | 1.053984372 | 0.2482   | -1.054 |
| 97381_s_at | 61.4   | 51.2   | 79.8   | 59.9   | 57.9   | 58.6   | 161.8  | 61.7   | 0.460218499 | 63.075   | 85       | 21.925  | 0.742058824 | 0.4763   | 1.225  |
| 97382_at   | 5.2    | 24.6   | 16.6   | 11     | 4.2    | 31.2   | 4.6    | 30.2   | 0.727648734 | 14.35    | 17.55    | 3.2     | 0.817663818 | 0.9276   | -1.064 |
| 97383_at   | 603.3  | 1198.4 | 652.5  | 504.7  | 894.7  | 1174.2 | 842.5  | 919.2  | 0.271062335 | 739.725  | 957.65   | 217.925 | 0.772437738 | 0.1782   | 1.36   |
| 97384_at   | 78.6   | 72.1   | 73     | 91.8   | 129.9  | 76.1   | 81.1   | 128.7  | 0.18642295  | 78.875   | 103.95   | 25.075  | 0.758778259 | 0.1573   | 1.284  |
| 97385_at   | 440.6  | 428.1  | 411.6  | 448.4  | 543.7  | 534.6  | 540.7  | 451.9  | 0.02396987  | 432.175  | 517.725  | 85.55   | 0.834757835 | 0.01017  | 1.195  |
| 97386_at   | 259.4  | 580.8  | 464.9  | 356.4  | 611.4  | 381    | 532.1  | 245.4  | 0.808323648 | 415.375  | 442.475  | 27.1    | 0.938753602 | 0.8596   | -1.051 |
| 97387_at   | 496.7  | 950.2  | 742.7  | 820.9  | 737.3  | 816.8  | 908.1  | 754.5  | 0.643142023 | 752.625  | 804.175  | 51.55   | 0.935897037 | 0.5617   | -1.094 |
| 97389_at   | 6.9    | 7.4    | 7.8    | 42     | 63     | 30.1   | 8.3    | 13.4   | 0.436375429 | 16.025   | 28.7     | 12.675  | 0.558362369 | 0.3482   | 1.889  |
| 97390_at   | 332.8  | 335.5  | 382.8  | 504.7  | 366.4  | 377.8  | 413.1  | 457.2  | 0.759856099 | 388.95   | 403.625  | 14.675  | 0.963641994 | 0.6759   | -1.049 |
| 97391_at   | 314.8  | 309    | 306.8  | 288.6  | 198.7  | 273.3  | 242.4  | 192.9  | 0.021770633 | 304.8    | 226.825  | 77.975  | 1.343767221 | 0.01148  | -1.357 |
| 97392_at   | 548.8  | 392.3  | 471.8  | 544.7  | 440.1  | 392.5  | 449.8  | 474.5  | 0.281420916 | 489.4    | 439.225  | 50.175  | 1.114235301 | 0.2942   | -1.107 |
| 97393_at   | 451.1  | 363.8  | 359.3  | 466.6  | 388.6  | 408.1  | 371.4  | 254.6  | 0.269240486 | 410.2    | 355.675  | 54.525  | 1.153300063 | 0.2807   | -1.164 |
| 97394_at   | 867.8  | 709.6  | 748.1  | 749.4  | 397    | 878.3  | 524.9  | 748.7  | 0.318277976 | 768.725  | 637.225  | 131.5   | 1.206363529 | 0.255    | -1.26  |
| 97395_at   | 2494.4 | 2390.2 | 2480.5 | 2060.2 | 2960.7 | 2728.7 | 2673   | 2181.9 | 0.205929998 | 2356.325 | 2636.075 | 279.75  | 0.893876312 | 0.216    | 1.115  |



|            |        |        |        |        |        |        |        |        |             |          |          |         |             |          |        |
|------------|--------|--------|--------|--------|--------|--------|--------|--------|-------------|----------|----------|---------|-------------|----------|--------|
| 97397_at   | 319    | 228.1  | 321    | 263.4  | 198.4  | 265.3  | 244.2  | 256.6  | 0.181616435 | 282.875  | 241.125  | 41.75   | 1.173146708 | 0.1884   | -1.169 |
| 97398_at   | 172.5  | 284.8  | 201.2  | 266    | 258.6  | 266.9  | 268.5  | 290.7  | 0.229304855 | 231.125  | 271.175  | 40.05   | 0.852309394 | 0.1871   | 1.196  |
| 97400_at   | 246.5  | 245.2  | 171.7  | 236.2  | 324.8  | 331.9  | 201.7  | 216.8  | 0.315670857 | 224.9    | 268.8    | 43.9    | 0.836681548 | 0.3386   | 1.178  |
| 97401_at   | 640.1  | 1077   | 857.4  | 884.6  | 846.7  | 948.9  | 809.9  | 888    | 0.932079944 | 864.775  | 873.375  | 8.6     | 0.990153142 | 0.8318   | -1.025 |
| 97402_at   | 10.2   | 16.7   | 56.8   | 52.1   | 33.7   | 51.1   | 53.2   | 26.4   | 0.623939346 | 33.95    | 41.1     | 7.15    | 0.826034063 | 0.4232   | 1.48   |
| 97403_at   | 445.3  | 668.9  | 443.4  | 498.9  | 592.4  | 465.4  | 525.3  | 501.6  | 0.910894907 | 514.125  | 521.175  | 7.05    | 0.986472874 | 0.8303   | -1.025 |
| 97404_at   | 333    | 505.9  | 387.9  | 417.5  | 371.3  | 434.7  | 351.4  | 404.4  | 0.635012281 | 411.075  | 390.45   | 20.625  | 1.052823665 | 0.6754   | -1.044 |
| 97405_at   | 314    | 333    | 330    | 329.9  | 291.1  | 329.6  | 362.9  | 328.3  | 0.939274194 | 326.725  | 327.975  | 1.25    | 0.996188734 | 0.9824   | -1.001 |
| 97406_at   | 544.6  | 679.1  | 621.1  | 581.9  | 629.8  | 634.1  | 646.5  | 579.6  | 0.647314416 | 606.675  | 622.5    | 15.825  | 0.974578313 | 0.6133   | -1.029 |
| 97407_at   | 778.7  | 875.8  | 707.3  | 607    | 763.6  | 738.8  | 765.5  | 748.1  | 0.849287989 | 742.2    | 754      | 11.8    | 0.984350133 | 0.7631   | -1.025 |
| 97409_at   | 94.6   | 105.5  | 101    | 117.2  | 218    | 189.3  | 146    | 124.4  | 0.050906461 | 104.575  | 169.425  | 64.85   | 0.617234765 | 0.01364  | 1.587  |
| 97410_at   | 612.4  | 580.7  | 763.4  | 621.6  | 525.7  | 585.9  | 547.6  | 689.5  | 0.333267174 | 644.525  | 587.175  | 57.35   | 1.097671052 | 0.3137   | -1.098 |
| 97411_at   | 1432.6 | 1387.9 | 1147.8 | 1298.1 | 1142.2 | 947.6  | 888.1  | 895.1  | 0.006953822 | 1316.6   | 968.25   | 348.35  | 1.359772786 | 0.006778 | -1.362 |
| 97412_at   | 2043.1 | 1819   | 1964.9 | 1710.1 | 1683.5 | 1586.5 | 1397.4 | 1553.6 | 0.014573135 | 1884.275 | 1555.25  | 329.025 | 1.211557627 | 0.01358  | -1.211 |
| 97413_at   | 58.7   | 46.8   | 60.4   | 32.4   | 28.2   | 23.3   | 79.4   | 74.8   | 0.914639511 | 49.575   | 51.425   | 1.85    | 0.96402528  | 0.8281   | -1.083 |
| 97414_at   | 700.2  | 656.4  | 598    | 609.3  | 637.6  | 694.9  | 614    | 739.3  | 0.439595852 | 640.975  | 671.45   | 30.475  | 0.954613151 | 0.4402   | -1.047 |
| 97415_at   | 410.6  | 502.4  | 454.2  | 505.8  | 639.4  | 513    | 546.8  | 455.7  | 0.176658475 | 468.25   | 538.725  | 70.475  | 0.869181865 | 0.1642   | 1.146  |
| 97418_at   | 15.8   | 26.4   | 20.7   | 20.5   | 35.7   | 26.3   | 24.3   | 48.8   | 0.099469425 | 20.85    | 33.775   | 12.925  | 0.617320503 | 0.05282  | 1.584  |
| 97419_at   | 961.8  | 880.5  | 852.4  | 894.5  | 755.1  | 853.8  | 880.2  | 929.2  | 0.369342164 | 897.3    | 854.575  | 42.725  | 1.049995612 | 0.3575   | -1.052 |
| 97420_at   | 14.7   | 17.1   | 17.3   | 13.9   | 15.5   | 18.3   | 14.8   | 35.3   | 0.361098779 | 15.75    | 20.975   | 5.225   | 0.750893921 | 0.3194   | 1.254  |
| 97421_at   | 1550.9 | 1263.1 | 1542.2 | 1548.7 | 1138   | 1181.7 | 1418.5 | 1246.7 | 0.050917684 | 1476.225 | 1246.225 | 230     | 1.184557363 | 0.05194  | -1.184 |
| 97422_at   | 1347.6 | 1197.8 | 1337.6 | 1226   | 1131.8 | 1571.9 | 1437.4 | 1519   | 0.26368308  | 1277.25  | 1415.025 | 137.775 | 0.902634229 | 0.276    | -1.101 |
| 97423_at   | 677    | 572.7  | 771.9  | 532    | 803.8  | 526.4  | 800.2  | 694.7  | 0.453692838 | 638.4    | 706.275  | 67.875  | 0.903897207 | 0.4807   | -1.102 |
| 97424_at   | 936.2  | 861.6  | 957    | 920.8  | 994.4  | 1098   | 776.2  | 1134.1 | 0.389726152 | 918.9    | 1000.675 | 81.775  | 0.918280161 | 0.4283   | -1.078 |
| 97425_at   | 925.3  | 760.4  | 742    | 627.1  | 468.3  | 729.3  | 952.3  | 439.1  | 0.433993842 | 763.7    | 647.25   | 116.45  | 1.179915025 | 0.3415   | -1.231 |
| 97426_at   | 4282.3 | 4043.2 | 3605.5 | 3501   | 3935.6 | 3724.8 | 3516.2 | 4307.9 | 0.959788708 | 3858     | 3871.125 | 13.125  | 0.996609513 | 0.9529   | -1.004 |
| 97427_at   | 45     | 39.8   | 53.9   | 39.8   | 69.4   | 90.8   | 105.9  | 95.4   | 0.005094284 | 44.625   | 90.375   | 45.75   | 0.493775934 | 0.000882 | 2.017  |
| 97428_at   | 629.6  | 951.4  | 691.3  | 691.5  | 757.5  | 865.1  | 843.6  | 713.1  | 0.534797054 | 740.95   | 794.825  | 53.875  | 0.932217784 | 0.4598   | -1.083 |
| 97429_at   | 483    | 685.4  | 419.2  | 496.5  | 272.8  | 428.3  | 333.1  | 416.6  | 0.066478396 | 521.025  | 362.7    | 158.325 | 1.436517783 | 0.05041  | -1.436 |
| 97430_at   | 300.6  | 240.1  | 308.1  | 200.2  | 261.5  | 310.2  | 298.1  | 187.7  | 0.956867761 | 262.25   | 264.375  | 2.125   | 0.991962175 | 0.976    | -1.005 |
| 97431_at   | 12.6   | 8.2    | 8.3    | 14.7   | 10.2   | 10.9   | 14.2   | 13.6   | 0.530797161 | 10.95    | 12.225   | 1.275   | 0.895705521 | 0.4508   | 1.145  |
| 97433_at   | 473.8  | 552.1  | 448.6  | 485.5  | 399.8  | 564.1  | 576.7  | 511.2  | 0.640183466 | 490      | 512.95   | 22.95   | 0.955258797 | 0.6971   | -1.039 |
| 97434_at   | 255.8  | 176.7  | 212.2  | 232.1  | 188.8  | 282.7  | 232.5  | 238    | 0.546277008 | 219.2    | 235.5    | 16.3    | 0.930785563 | 0.5595   | -1.073 |
| 97435_at   | 18.4   | 6.9    | 8.8    | 15.2   | 32.3   | 21.5   | 9.1    | 26.1   | 0.140872325 | 12.325   | 22.25    | 9.925   | 0.553932584 | 0.1642   | 1.769  |
| 97436_at   | 750.5  | 978.3  | 850.5  | 931.3  | 964.1  | 961.7  | 974    | 1128.8 | 0.092903608 | 877.65   | 1007.15  | 129.5   | 0.871419352 | 0.09201  | 1.151  |
| 97437_f_at | 62.9   | 74.2   | 59.5   | 71.2   | 102    | 78.1   | 74.4   | 56.7   | 0.339162333 | 66.95    | 77.8     | 10.85   | 0.860539846 | 0.3491   | 1.142  |
| 97438_r_at | 29.1   | 30.6   | 27.7   | 39.8   | 41.1   | 40.4   | 24.1   | 43.8   | 0.33872508  | 31.8     | 37.35    | 5.55    | 0.851405622 | 0.4042   | 1.155  |
| 97441_at   | 562.1  | 827.7  | 838.7  | 735.3  | 1007.1 | 695.7  | 675.2  | 870.5  | 0.509120756 | 740.95   | 812.125  | 71.175  | 0.912359551 | 0.5219   | -1.095 |
| 97442_at   | 67.2   | 86.9   | 104.3  | 114.1  | 63.1   | 67.2   | 153.6  | 116    | 0.787490163 | 93.125   | 99.975   | 6.85    | 0.931482871 | 0.9355   | -1.021 |
| 97443_at   | 4819.4 | 4136.6 | 3962.6 | 4123.4 | 5504.7 | 3528.7 | 4022.2 | 4374.7 | 0.84310038  | 4260.5   | 4357.575 | 97.075  | 0.977722701 | 0.9109   | -1.012 |
| 97444_at   | 510.2  | 476.7  | 498.7  | 429.5  | 903.9  | 546.8  | 670.8  | 401.9  | 0.248558276 | 478.775  | 630.85   | 152.075 | 0.758936356 | 0.2277   | 1.265  |
| 97445_at   | 1295.6 | 886.2  | 1073.9 | 1026.4 | 869.5  | 1064.5 | 1038.4 | 1008.1 | 0.469193406 | 1070.525 | 995.125  | 75.4    | 1.075769376 | 0.4881   | -1.069 |
| 97446_at   | 938.6  | 1082.8 | 893.8  | 966.2  | 690.1  | 1023.3 | 938.5  | 1126.6 | 0.812182872 | 970.35   | 944.625  | 25.725  | 1.027233029 | 0.7341   | -1.041 |
| 97447_at   | 1119.7 | 1263.7 | 1151.9 | 1006.5 | 1253.3 | 1223.2 | 1241.3 | 1194.6 | 0.177686993 | 1135.45  | 1228.1   | 92.65   | 0.924558261 | 0.1404   | -1.085 |
| 97448_at   | 809.8  | 915.9  | 1175.5 | 1188   | 1150.8 | 1621.8 | 1622.5 | 1216.3 | 0.056803105 | 1022.3   | 1402.85  | 380.55  | 0.728730798 | 0.05308  | 1.373  |
| 97449_at   | 1808.3 | 1581.2 | 1826.6 | 1510.5 | 1380   | 1950.4 | 1753.4 | 1677.7 | 0.953515698 | 1681.65  | 1690.375 | 8.725   | 0.994838423 | 0.9923   | -1.001 |
| 97450_s_at | 1899.8 | 1790.7 | 1846.4 | 1784.3 | 1497.6 | 2044.1 | 1940.3 | 1792.8 | 0.929626956 | 1830.3   | 1818.7   | 11.6    | 1.006378182 | 0.8602   | -1.013 |
| 97451_at   | 2370.6 | 2239.9 | 2525.3 | 2226.5 | 2003.9 | 2154.5 | 2066.5 | 1695.2 | 0.02888251  | 2340.575 | 1980.025 | 360.55  | 1.18209366  | 0.03019  | -1.185 |
| 97452_at   | 1322.2 | 1428.1 | 1228.7 | 940    | 1186.9 | 1356.3 | 1078.4 | 1137.1 | 0.753934777 | 1229.75  | 1189.675 | 40.075  | 1.03368567  | 0.8175   | -1.025 |
| 97456_at   | 291.4  | 288.2  | 298.4  | 245.8  | 281.9  | 385.4  | 492.2  | 389.6  | 0.085591672 | 280.95   | 387.275  | 106.325 | 0.725453489 | 0.04765  | 1.356  |
| 97458_at   | 1022.6 | 1481.2 | 975.7  | 1233.8 | 1460.2 | 1292.8 | 1821.8 | 1487   | 0.079856542 | 1178.325 | 1515.45  | 337.125 | 0.777541324 | 0.07348  | 1.294  |
| 97459_at   | 5064.6 | 3749   | 4393.1 | 3835.1 | 3370.7 | 3728   | 3293.2 | 3541.4 | 0.07837227  | 4260.45  | 3483.325 | 777.125 | 1.22309862  | 0.04015  | -1.216 |
| 97460_at   | 1488.2 | 2848.5 | 1524.2 | 2226.9 | 2448.6 | 2037.3 | 1954.7 | 2377.6 | 0.62681849  | 2021.95  | 2204.55  | 182.6   | 0.917171305 | 0.5007   | 1.127  |
| 97462_at   | 990.9  | 1258.9 | 1005.4 | 889    | 1296   | 1082.6 | 1043.7 | 918.9  | 0.673055449 | 1036.05  | 1085.3   | 49.25   | 0.954620842 | 0.6608   | -1.048 |
| 97463_g_at | 2034.7 | 2447.2 | 2109.3 | 2068.2 | 2038.8 | 2190.6 | 1903   | 2035.6 | 0.322783425 | 2164.85  | 2042     | 122.85  | 1.060161606 | 0.3095   | -1.059 |
| 97464_at   | 1410.5 | 1588   | 1350.9 | 1554.2 | 1283.1 | 1557.3 | 1520.3 | 1756.9 | 0.655116074 | 1475.9   | 1529.4   | 53.5    | 0.965018962 | 0.6896   | -1.032 |



|            |         |         |         |         |         |         |         |         |             |           |          |          |             |           |        |
|------------|---------|---------|---------|---------|---------|---------|---------|---------|-------------|-----------|----------|----------|-------------|-----------|--------|
| 97465_at   | 113.7   | 42.4    | 174.3   | 68.2    | 85.6    | 94.6    | 84.8    | 128.7   | 0.970212845 | 99.65     | 98.425   | 1.225    | 1.012446025 | 0.7477    | 1.115  |
| 97468_at   | 4205.1  | 3308.4  | 3693.2  | 3688.6  | 2768    | 2774.2  | 2995.3  | 3136.6  | 0.014487497 | 3723.825  | 2918.525 | 805.3    | 1.275927052 | 0.005833  | -1.273 |
| 97469_at   | 34.1    | 35.8    | 33.9    | 37      | 76.3    | 35      | 35.5    | 52.3    | 0.230466633 | 35.2      | 49.775   | 14.575   | 0.70718232  | 0.1657    | 1.342  |
| 97470_at   | 136.9   | 60.8    | 150.1   | 85      | 105.5   | 183.8   | 158.5   | 96.8    | 0.383774515 | 108.2     | 136.15   | 27.95    | 0.794711715 | 0.3639    | 1.294  |
| 97471_at   | 1065.9  | 646.4   | 821.1   | 818.4   | 517.5   | 622     | 582.6   | 764     | 0.085316989 | 837.95    | 621.525  | 216.425  | 1.348216081 | 0.06606   | -1.341 |
| 97472_at   | 1345.3  | 1178    | 1351.2  | 1315.6  | 1000    | 1301.9  | 1188.8  | 1121.6  | 0.110985245 | 1297.525  | 1153.075 | 144.45   | 1.125273725 | 0.1073    | -1.129 |
| 97473_at   | 853.5   | 1112.3  | 1064.5  | 798.3   | 1505.1  | 1186.5  | 1314.9  | 1130.1  | 0.028198588 | 957.15    | 1284.15  | 327      | 0.745356851 | 0.02785   | 1.347  |
| 97474_r_at | 176.2   | 229.1   | 258.1   | 335.2   | 226.3   | 292.9   | 327.3   | 248.8   | 0.571718768 | 249.65    | 273.825  | 24.175   | 0.911713686 | 0.5136    | -1.115 |
| 97475_at   | 45.7    | 19.3    | 11.1    | 11.4    | 38.7    | 36.9    | 7.4     | 10.3    | 0.905457924 | 21.875    | 23.325   | 1.45     | 0.937834941 | 0.9898    | -1.007 |
| 97477_at   | 1715    | 1428    | 1494.9  | 1401    | 1953.3  | 1287    | 1452.6  | 1388.3  | 0.951617374 | 1509.725  | 1520.3   | 10.575   | 0.993044136 | 0.9779    | -1.003 |
| 97478_at   | 1055.7  | 864.5   | 1063.7  | 926.7   | 771.1   | 1054.5  | 1035.5  | 803     | 0.520745548 | 977.65    | 916.025  | 61.625   | 1.067274365 | 0.4885    | -1.074 |
| 97479_at   | 2524    | 2115.6  | 2286.7  | 2340.2  | 1775    | 2343.9  | 2518.6  | 2388.5  | 0.759785009 | 2316.625  | 2256.5   | 60.125   | 1.026645247 | 0.7148    | -1.034 |
| 97480_f_at | 116.2   | 139.5   | 121.1   | 127.6   | 81.1    | 135.8   | 126.3   | 116     | 0.43201451  | 126.1     | 114.8    | 11.3     | 1.098432056 | 0.3976    | -1.116 |
| 97481_r_at | 79.7    | 51.7    | 82.8    | 85.8    | 118     | 104.1   | 108     | 78.2    | 0.058010746 | 75        | 102.075  | 27.075   | 0.734753857 | 0.07669   | 1.372  |
| 97482_at   | 353.3   | 291.3   | 234.5   | 393.3   | 174.7   | 291.5   | 248.8   | 391.7   | 0.497718537 | 318.1     | 276.675  | 41.425   | 1.149724406 | 0.4549    | -1.176 |
| 97483_at   | 17455.9 | 19631.5 | 17385.1 | 14659.6 | 32848.7 | 15602.7 | 20225.5 | 16676.7 | 0.386796889 | 17283.025 | 21338.4  | 4055.375 | 0.809949434 | 0.3761    | 1.186  |
| 97484_at   | 1940.7  | 1918.6  | 1795.1  | 1995.4  | 1821.3  | 1977.5  | 1973.5  | 2475.3  | 0.378693203 | 1912.45   | 2061.9   | 149.45   | 0.927518308 | 0.359     | -1.072 |
| 97485_at   | 2454.4  | 2221    | 1960    | 2169.1  | 2146    | 2346.5  | 2086.4  | 2657.3  | 0.536056394 | 2201.125  | 2309.05  | 107.925  | 0.953259999 | 0.5387    | -1.048 |
| 97486_at   | 3558.4  | 2519.7  | 3066.5  | 2117.2  | 1882.1  | 3183.2  | 1861.9  | 2040.5  | 0.246169367 | 2815.45   | 2241.925 | 573.525  | 1.255818103 | 0.2174    | -1.265 |
| 97487_at   | 2531.1  | 2231.9  | 2536.1  | 2834.3  | 2263.1  | 2802.1  | 2627.8  | 3038.1  | 0.494207199 | 2533.35   | 2682.775 | 149.425  | 0.944302075 | 0.5125    | -1.057 |
| 97488_at   | 765.8   | 802     | 977.7   | 727.6   | 1110.9  | 788.1   | 854.7   | 728.9   | 0.624226334 | 818.275   | 870.65   | 52.375   | 0.939843795 | 0.6385    | -1.057 |
| 97489_at   | 888.5   | 783.7   | 865.2   | 875.1   | 575.3   | 797.1   | 728.2   | 743     | 0.050145406 | 853.125   | 710.9    | 142.225  | 1.2000633   | 0.04859   | -1.207 |
| 97490_at   | 124.8   | 147.1   | 101     | 130.6   | 163.8   | 128.7   | 130.5   | 135.1   | 0.320586927 | 125.875   | 139.525  | 13.65    | 0.90216807  | 0.3094    | -1.113 |
| 97491_at   | 1558    | 1635.7  | 1536.2  | 1816.4  | 1122.1  | 1519.3  | 1111.6  | 1413.1  | 0.036022006 | 1636.575  | 1291.525 | 345.05   | 1.267164786 | 0.03272   | -1.277 |
| 97492_at   | 1323.6  | 1227.9  | 1272.4  | 1177.9  | 1248.8  | 1150.1  | 1184.2  | 1208.9  | 0.217273164 | 1250.45   | 1198     | 52.45    | 1.043781302 | 0.2114    | -1.043 |
| 97496_f_at | 1597.3  | 1851.3  | 1428.3  | 1454    | 2079.7  | 1653.4  | 2121.2  | 1511    | 0.211167198 | 1582.725  | 1841.325 | 258.6    | 0.859557655 | 0.2056    | 1.157  |
| 97497_at   | 171.2   | 302.4   | 167     | 245.3   | 187.7   | 229.9   | 181.2   | 238.3   | 0.747876378 | 221.475   | 209.275  | 12.2     | 1.0582965   | 0.8468    | -1.033 |
| 97498_at   | 1830.6  | 1504.3  | 1692.4  | 1316.5  | 1171.5  | 1716.2  | 1655.4  | 1215.3  | 0.452732582 | 1585.95   | 1439.6   | 146.35   | 1.101660183 | 0.4308    | -1.11  |
| 97499_at   | 4.1     | 1.4     | 3.6     | 4.8     | 11.3    | 15.7    | 5.7     | 3.1     | 0.146511528 | 3.475     | 8.95     | 5.475    | 0.388268156 | 0.1064    | 2.386  |
| 97500_g_at | 730.3   | 772.6   | 859.7   | 831     | 515.3   | 816.6   | 565.1   | 462.4   | 0.070397507 | 798.4     | 589.85   | 208.55   | 1.353564466 | 0.04511   | -1.384 |
| 97502_at   | 2342.2  | 1908.2  | 1993.7  | 2212.9  | 2115.3  | 2048.1  | 2142.4  | 2052.9  | 0.823941134 | 2114.25   | 2089.675 | 24.575   | 1.011760202 | 0.8645    | -1.009 |
| 97504_at   | 1196.1  | 1848.1  | 1153.9  | 2208    | 922.8   | 1327    | 856.4   | 1062.1  | 0.114668977 | 1601.525  | 1042.075 | 559.45   | 1.53686155  | 0.07391   | -1.5   |
| 97505_at   | 2433    | 2144.9  | 1905.9  | 2196.9  | 1457.1  | 2140.8  | 1399.3  | 1975.1  | 0.105130415 | 2170.175  | 1743.075 | 427.1    | 1.245026749 | 0.09641   | -1.262 |
| 97506_at   | 1042.9  | 1062.8  | 885.2   | 1029.5  | 761.1   | 1012.5  | 860.1   | 759.2   | 0.078577027 | 1005.1    | 848.225  | 156.875  | 1.184945032 | 0.07195   | -1.19  |
| 97507_at   | 166.6   | 170.5   | 198.2   | 169.3   | 186.7   | 291     | 210.4   | 319.6   | 0.094009181 | 176.15    | 251.925  | 75.775   | 0.699216037 | 0.04663   | 1.399  |
| 97508_at   | 158.3   | 191     | 201.2   | 242.1   | 226.6   | 182.2   | 236.9   | 238.2   | 0.33663616  | 198.15    | 220.975  | 22.825   | 0.896707772 | 0.3291    | 1.121  |
| 97509_f_at | 392.5   | 576.8   | 448.6   | 427.2   | 581.4   | 650     | 608.3   | 605.2   | 0.027375483 | 461.275   | 611.225  | 149.95   | 0.754672993 | 0.01471   | 1.338  |
| 97510_at   | 52.8    | 72.4    | 64.5    | 30.4    | 28.5    | 50.3    | 41      | 83.7    | 0.791095967 | 55.025    | 50.875   | 4.15     | 1.081572482 | 0.736     | -1.11  |
| 97511_at   | 127.6   | 176.5   | 129.6   | 133.1   | 130.8   | 155.4   | 136.8   | 98.7    | 0.521994852 | 141.7     | 130.425  | 11.275   | 1.08644815  | 0.5061    | -1.091 |
| 97512_at   | 5361.2  | 5125.5  | 5131.6  | 4812.3  | 6462.4  | 4910.5  | 5979    | 4491.9  | 0.502501956 | 5107.65   | 5460.95  | 353.3    | 0.935304297 | 0.5383    | -1.059 |
| 97514_at   | 477     | 417.9   | 371.6   | 488.5   | 615.8   | 416.6   | 471     | 439.7   | 0.410778801 | 438.75    | 485.775  | 47.025   | 0.903195924 | 0.4059    | 1.101  |
| 97515_at   | 746.6   | 1018.9  | 917.3   | 947.5   | 995     | 929     | 1083.3  | 1032.9  | 0.185915639 | 907.575   | 1010.05  | 102.475  | 0.898544627 | 0.1821    | -1.118 |
| 97516_at   | 982.5   | 907.1   | 898.5   | 912.3   | 583.1   | 1010.3  | 856.9   | 772.2   | 0.274001305 | 925.1     | 805.625  | 119.475  | 1.148301009 | 0.2289    | -1.17  |
| 97517_at   | 702.4   | 704.6   | 680.7   | 449.8   | 639.2   | 627.4   | 555.6   | 596.7   | 0.67259759  | 634.375   | 604.725  | 29.65    | 1.049030551 | 0.7839    | -1.033 |
| 97518_at   | 1321.8  | 1145.3  | 1173.2  | 950.7   | 1339.1  | 1064.8  | 1062.4  | 1191.5  | 0.873679031 | 1147.75   | 1164.45  | 16.7     | 0.985658465 | 0.8556    | -1.017 |
| 97519_at   | 3949.7  | 3392.6  | 3062.1  | 3961.4  | 5184.3  | 4218.4  | 4833    | 3871.2  | 0.04764759  | 3591.45   | 4526.725 | 935.275  | 0.793388156 | 0.04414   | 1.26   |
| 97520_s_at | 917.5   | 866.1   | 878.6   | 1010.7  | 367.5   | 405.2   | 299.1   | 382.9   | 2.05865E-05 | 918.225   | 363.675  | 554.55   | 2.524850485 | 0.0000164 | -2.536 |
| 97521_at   | 340.6   | 473.6   | 393.5   | 329.5   | 362.2   | 384.9   | 451.4   | 358.4   | 0.905003746 | 384.3     | 389.225  | 4.925    | 0.98734665  | 0.8543    | -1.019 |
| 97523_i_at | 1.4     | 0.9     | 1.3     | 4.4     | 16.2    | 0.6     | 0.8     | 5.1     | 0.3931336   | 2         | 5.675    | 3.675    | 0.352422907 | 0.6429    | 1.528  |
| 97524_f_at | 15.8    | 38.3    | 8.5     | 5.9     | 44.7    | 31.3    | 24.1    | 39.1    | 0.096242153 | 17.125    | 34.8     | 17.675   | 0.492097701 | 0.07112   | 2.57   |
| 97525_at   | 221.3   | 237.5   | 229.3   | 274.2   | 197.9   | 272.9   | 312.2   | 211.5   | 0.79601023  | 240.575   | 248.625  | 8.05     | 0.967621921 | 0.8757    | -1.019 |
| 97526_at   | 771.5   | 473.2   | 634.8   | 546.5   | 403.2   | 620.2   | 486.1   | 471.4   | 0.211833632 | 606.5     | 495.225  | 111.275  | 1.224695845 | 0.1989    | -1.219 |
| 97527_at   | 4168.2  | 3684.3  | 3657.8  | 4162.1  | 4326.7  | 3013.7  | 3300.2  | 2659.2  | 0.200568137 | 3918.1    | 3324.95  | 593.15   | 1.17839366  | 0.1539    | -1.196 |
| 97528_at   | 2482.1  | 2305.1  | 2310.8  | 2462.4  | 2334.8  | 2133    | 2177.4  | 2815.3  | 0.886713853 | 2390.1    | 2365.125 | 24.975   | 1.010559696 | 0.816     | -1.016 |
| 97529_at   | 66.7    | 66.9    | 48.2    | 79.5    | 5.3     | 83.4    | 85.8    | 54.3    | 0.704192232 | 65.325    | 57.2     | 8.125    | 1.142045455 | 0.4612    | -1.697 |
| 97530_at   | 555.2   | 685.3   | 610.1   | 522.9   | 662.3   | 578.7   | 664.2   | 655.6   | 0.307778557 | 593.375   | 640.2    | 46.825   | 0.926858794 | 0.2843    | -1.083 |



|            |        |         |         |         |         |         |         |         |             |           |           |         |             |          |        |
|------------|--------|---------|---------|---------|---------|---------|---------|---------|-------------|-----------|-----------|---------|-------------|----------|--------|
| 97531_at   | 427.9  | 414     | 440.3   | 385     | 522.5   | 449.8   | 444.5   | 446.3   | 0.07957828  | 416.8     | 465.775   | 48.975  | 0.894852665 | 0.06465  | 1.116  |
| 97532_at   | 102.5  | 196.8   | 111     | 154.3   | 218     | 134.1   | 176.3   | 157.1   | 0.324724443 | 141.15    | 171.375   | 30.225  | 0.823632385 | 0.2878   | 1.237  |
| 97533_at   | 33.7   | 76.7    | 33.1    | 36.5    | 68.1    | 58.4    | 78.7    | 3.2     | 0.735363056 | 45        | 52.1      | 7.1     | 0.863723608 | 0.7305   | -1.332 |
| 97535_at   | 4129.5 | 3629.4  | 3414.3  | 3031.4  | 3075.9  | 3469.6  | 3361.4  | 2677.2  | 0.214126668 | 3551.15   | 3146.025  | 405.125 | 1.128773611 | 0.2157   | -1.127 |
| 97536_at   | 219.8  | 334.2   | 216.8   | 314.1   | 230.8   | 358.1   | 349.2   | 180.3   | 0.881849744 | 271.225   | 279.6     | 8.375   | 0.970046495 | 0.9632   | -1.01  |
| 97538_at   | 775.8  | 807.2   | 639.7   | 796     | 658.3   | 909.5   | 805.8   | 873.8   | 0.434836149 | 754.675   | 811.85    | 57.175  | 0.929574429 | 0.4685   | -1.072 |
| 97539_at   | 226.1  | 180.2   | 316.6   | 270.1   | 275.9   | 284.7   | 241.3   | 280.1   | 0.514376035 | 248.25    | 270.5     | 22.25   | 0.917744917 | 0.4383   | 1.111  |
| 97540_f_at | 545.9  | 565.7   | 553.5   | 622.7   | 668.6   | 819.1   | 882.8   | 722.3   | 0.018930876 | 571.95    | 773.2     | 201.25  | 0.739718055 | 0.005072 | 1.346  |
| 97541_f_at | 22.4   | 49.3    | 37.1    | 101.3   | 108.9   | 64.2    | 62.8    | 58.6    | 0.355068851 | 52.525    | 73.625    | 21.1    | 0.713412564 | 0.2351   | 1.579  |
| 97542_at   | 31.9   | 25.5    | 34.9    | 69.4    | 116.5   | 29      | 33.5    | 106.7   | 0.287022456 | 40.425    | 71.425    | 31      | 0.565978299 | 0.3307   | 1.573  |
| 97543_at   | 2315.8 | 1775.8  | 1877.1  | 2372.9  | 1700.9  | 2214.9  | 2145    | 1643.6  | 0.479866251 | 2085.4    | 1926.1    | 159.3   | 1.082705986 | 0.4783   | -1.084 |
| 97544_at   | 4784.5 | 4507.1  | 5278.2  | 5215.7  | 3995.5  | 4993    | 5324.3  | 5299.4  | 0.90940862  | 4946.375  | 4903.05   | 43.325  | 1.008836337 | 0.8688   | -1.013 |
| 97546_at   | 178.8  | 100.8   | 143.7   | 107.3   | 48.6    | 108.3   | 65      | 138.6   | 0.171118526 | 132.65    | 90.125    | 42.525  | 1.47184466  | 0.1563   | -1.556 |
| 97548_at   | 60.2   | 79.1    | 90.9    | 116.9   | 50.5    | 77.8    | 103.1   | 103.3   | 0.863625498 | 86.775    | 83.675    | 3.1     | 1.037048103 | 0.8354   | -1.049 |
| 97549_at   | 599.7  | 547.6   | 637.9   | 600.7   | 527.8   | 718.3   | 660.6   | 705.3   | 0.297377063 | 596.475   | 653       | 56.525  | 0.913437979 | 0.3163   | -1.088 |
| 97550_at   | 419.9  | 704.5   | 611.6   | 561.8   | 535.8   | 649.9   | 708.2   | 616.6   | 0.47884174  | 574.45    | 627.625   | 53.175  | 0.915275841 | 0.4477   | 1.106  |
| 97551_at   | 111    | 181.7   | 120.8   | 137.6   | 137.9   | 177.2   | 177.4   | 215.6   | 0.128520257 | 137.775   | 177.025   | 39.25   | 0.778279904 | 0.1199   | 1.292  |
| 97553_at   | 640.8  | 995.6   | 900.6   | 824.9   | 776.4   | 770.7   | 835.9   | 764.5   | 0.532153885 | 840.475   | 786.875   | 53.6    | 1.068117554 | 0.5981   | -1.055 |
| 97554_at   | 555.8  | 529.2   | 587     | 526.4   | 453.9   | 610.7   | 647.5   | 461.1   | 0.910375305 | 549.6     | 543.3     | 6.3     | 1.011595803 | 0.8157   | -1.024 |
| 97555_at   | 4.1    | 6.6     | 3.9     | 14.5    | 6.4     | 11.6    | 6.7     | 12.2    | 0.534939246 | 7.275     | 9.225     | 1.95    | 0.788617886 | 0.3645   | 1.41   |
| 97556_at   | 2323.7 | 2067.5  | 2033.9  | 2162.4  | 1584.2  | 1975.5  | 1906.5  | 1585.5  | 0.025509882 | 2146.875  | 1762.925  | 383.95  | 1.217791455 | 0.02272  | -1.223 |
| 97557_at   | 257.7  | 332.2   | 294.5   | 276.3   | 383.5   | 289.9   | 311.2   | 360.8   | 0.140519165 | 290.175   | 336.35    | 46.175  | 0.862717407 | 0.1341   | 1.157  |
| 97559_at   | 8068.3 | 8858.1  | 8074.7  | 7449.1  | 8686.4  | 7859.7  | 8368.3  | 9190.4  | 0.342766868 | 8112.55   | 8526.2    | 413.65  | 0.951484835 | 0.3406   | -1.051 |
| 97560_at   | 226.9  | 310.7   | 278.7   | 342.2   | 179.3   | 403.8   | 191.3   | 287.1   | 0.693980191 | 289.625   | 265.375   | 24.25   | 1.091380122 | 0.5531   | -1.14  |
| 97561_at   | 14.5   | 11.3    | 16.2    | 11.2    | 14.5    | 17.4    | 27.9    | 20.6    | 0.094914657 | 13.3      | 20.1      | 6.8     | 0.661691542 | 0.0557   | 1.485  |
| 97562_r_at | 75.7   | 31.9    | 117.3   | 73.7    | 96.9    | 73.6    | 176.3   | 56.2    | 0.447127573 | 74.65     | 100.75    | 26.1    | 0.740942928 | 0.4366   | 1.356  |
| 97563_f_at | 81.5   | 50.6    | 53.3    | 56.2    | 65.4    | 73      | 16.6    | 102.8   | 0.843766823 | 60.4      | 64.45     | 4.05    | 0.93716059  | 0.8096   | -1.11  |
| 97564_f_at | 7.1    | 40.4    | 41.1    | 27.1    | 75.7    | 15.6    | 15.5    | 32      | 0.73814084  | 28.925    | 34.7      | 5.775   | 0.833573487 | 0.794    | 1.165  |
| 97565_r_at | 74.4   | 55      | 52.5    | 84.8    | 75.9    | 95.8    | 74.5    | 83      | 0.148805413 | 66.675    | 82.3      | 15.625  | 0.810145808 | 0.1326   | 1.253  |
| 97566_f_at | 57.7   | 50      | 81.4    | 71.9    | 75.2    | 82.7    | 121.2   | 89.4    | 0.077456673 | 65.25     | 92.125    | 26.875  | 0.708276798 | 0.06094  | 1.413  |
| 97567_f_at | 144    | 143.1   | 193.6   | 126.3   | 173.9   | 148.9   | 156.4   | 178.8   | 0.471055768 | 151.75    | 164.5     | 12.75   | 0.922492401 | 0.4012   | -1.095 |
| 97568_at   | 17.6   | 15      | 27.7    | 26.2    | 18.7    | 20.2    | 36      | 17.5    | 0.792904174 | 21.625    | 23.1      | 1.475   | 0.936147186 | 0.8141   | -1.056 |
| 97569_at   | 19.7   | 14.6    | 20.9    | 10      | 64      | 22.8    | 32.9    | 27.9    | 0.109635557 | 16.3      | 36.9      | 20.6    | 0.441734417 | 0.03262  | 2.172  |
| 97570_at   | 85.4   | 100.9   | 113.9   | 112.9   | 118.8   | 87.5    | 98.9    | 113.8   | 0.884786767 | 103.275   | 104.75    | 1.475   | 0.985918854 | 0.8939   | -1.014 |
| 97571_r_at | 9      | 8.4     | 16.4    | 9.3     | 6.2     | 9.6     | 6.9     | 10.8    | 0.322454885 | 10.775    | 8.375     | 2.4     | 1.286567164 | 0.2785   | -1.276 |
| 97572_at   | 68.6   | 7       | 13.5    | 17.7    | 27.5    | 2.3     | 27.1    | 5.9     | 0.518680732 | 26.7      | 15.7      | 11      | 1.700636943 | 0.463    | -1.835 |
| 97573_at   | 271.3  | 158.4   | 112.4   | 243.7   | 62.7    | 233     | 210.1   | 214.8   | 0.773124938 | 196.45    | 180.15    | 16.3    | 1.090480155 | 0.7115   | -1.156 |
| 97574_f_at | 4.1    | 3.6     | 3       | 6.7     | 4.3     | 6.4     | 5.6     | 3.9     | 0.512551289 | 4.35      | 5.05      | 0.7     | 0.861386139 | 0.4069   | 1.203  |
| 97575_f_at | 25.1   | 12.2    | 7.6     | 17.4    | 19.7    | 25.3    | 18.1    | 40.3    | 0.158070635 | 15.575    | 25.85     | 10.275  | 0.602514507 | 0.1278   | 1.734  |
| 97576_f_at | 8.4    | 41.4    | 7.9     | 7.8     | 32.6    | 7       | 8.7     | 9.2     | 0.853453757 | 16.375    | 14.375    | 2       | 1.139130435 | 0.9456   | -1.039 |
| 97577_f_at | 16.7   | 29.9    | 34.7    | 39.7    | 38.9    | 32.9    | 24.5    | 50      | 0.419171776 | 30.25     | 36.575    | 6.325   | 0.827067669 | 0.4284   | 1.229  |
| 97578_at   | 11.9   | 6.5     | 8.3     | 6.6     | 52.6    | 5.3     | 5.1     | 7.1     | 0.490186262 | 8.325     | 17.525    | 9.2     | 0.475035663 | 0.7208   | 1.241  |
| 97579_f_at | 175.7  | 271.6   | 139.1   | 84      | 185.8   | 96      | 97.6    | 102.5   | 0.346917127 | 167.6     | 120.475   | 47.125  | 1.391159992 | 0.3656   | -1.33  |
| 97580_at   | 17.3   | 6.9     | 18.5    | 20.9    | 8.6     | 7       | 41.7    | 7.7     | 0.971057346 | 15.9      | 16.25     | 0.35    | 0.978461538 | 0.6737   | -1.244 |
| 97581_at   | 259.5  | 296.5   | 298.3   | 311.5   | 309.9   | 365.5   | 365.4   | 376.8   | 0.017315516 | 291.45    | 354.4     | 62.95   | 0.822375847 | 0.01675  | 1.215  |
| 97593_f_at | 586.7  | 741.5   | 562.7   | 681.8   | 1035.8  | 730.8   | 890.4   | 732.5   | 0.062116924 | 643.175   | 847.375   | 204.2   | 0.759020504 | 0.04325  | 1.311  |
| 97594_r_at | 1619.5 | 2070.4  | 1863.2  | 1741.7  | 2510    | 1721.2  | 2118.9  | 1992.8  | 0.228266872 | 1823.7    | 2085.725  | 262.025 | 0.874372221 | 0.2182   | 1.138  |
| 97598_at   | 48.6   | 71.1    | 22.7    | 13.9    | 33.8    | 14.5    | 63      | 37.1    | 0.908090075 | 39.075    | 37.1      | 1.975   | 1.053234501 | 0.9796   | -1.013 |
| 97601_f_at | 88.9   | 62.2    | 89.4    | 26.3    | 85.9    | 25.1    | 49      | 109.4   | 0.979289905 | 66.7      | 67.35     | 0.65    | 0.990348924 | 0.948    | -1.03  |
| 97610_f_at | 51.4   | 55.5    | 34.5    | 64.6    | 66.4    | 55.4    | 70.5    | 86.7    | 0.090213627 | 51.5      | 69.75     | 18.25   | 0.738351254 | 0.1002   | 1.371  |
| 97645_f_at | 71.1   | 40.6    | 58.2    | 44.1    | 53.9    | 43.5    | 51.8    | 60.5    | 0.896716761 | 53.5      | 52.425    | 1.075   | 1.020505484 | 0.9869   | -1.003 |
| 97647_at   | 18408  | 20376.8 | 19394.5 | 15697.4 | 35217.7 | 16199.9 | 21383.5 | 19693.4 | 0.350119696 | 18469.175 | 23123.625 | 4654.45 | 0.798714518 | 0.3282   | 1.204  |
| 97651_at   | 23.1   | 35.9    | 24.1    | 47.3    | 9.5     | 29.6    | 16.9    | 31.7    | 0.218619448 | 32.6      | 21.925    | 10.675  | 1.486887115 | 0.2119   | -1.585 |
| 97652_at   | 96.7   | 97.7    | 86.2    | 129.6   | 185.8   | 80.8    | 70.1    | 130.9   | 0.638543427 | 102.55    | 116.9     | 14.35   | 0.877245509 | 0.7928   | -1.068 |
| 97653_at   | 11.7   | 9.6     | 24.6    | 16.7    | 16.8    | 12.4    | 15.1    | 14.1    | 0.778857583 | 15.65     | 14.6      | 1.05    | 1.071917808 | 0.961    | -1.011 |
| 97654_at   | 17.8   | 6.8     | 36.6    | 12.7    | 56      | 25.3    | 45.4    | 14.7    | 0.19472601  | 18.475    | 35.35     | 16.875  | 0.522630835 | 0.1775   | 2.029  |



|            |         |         |         |         |         |         |         |         |             |           |           |         |             |          |        |
|------------|---------|---------|---------|---------|---------|---------|---------|---------|-------------|-----------|-----------|---------|-------------|----------|--------|
| 97655_at   | 7.2     | 10.3    | 4.8     | 4.7     | 7.2     | 3.4     | 4       | 10.9    | 0.868805534 | 6.75      | 6.375     | 0.375   | 1.058823529 | 0.7325   | -1.125 |
| 97658_f_at | 29.3    | 85.9    | 94.9    | 66.3    | 96.6    | 64.3    | 87.3    | 28.5    | 0.997268104 | 69.1      | 69.175    | 0.075   | 0.998915793 | 0.9891   | -1.005 |
| 97659_r_at | 754.8   | 807.6   | 1190.7  | 873.2   | 1240.5  | 831.6   | 1162.2  | 828.4   | 0.483318126 | 906.575   | 1015.675  | 109.1   | 0.89258375  | 0.4744   | 1.119  |
| 97660_s_at | 57.7    | 64.6    | 44.4    | 64.9    | 93.2    | 47.6    | 45.3    | 64.9    | 0.707435751 | 57.9      | 62.75     | 4.85    | 0.922709163 | 0.8037   | -1.05  |
| 97661_at   | 68.4    | 49.7    | 52.6    | 77.1    | 50.8    | 76.5    | 51      | 49.4    | 0.605558276 | 61.95     | 56.925    | 5.025   | 1.088274045 | 0.5857   | -1.089 |
| 97665_i_at | 46.8    | 128.6   | 105.1   | 133.6   | 109.7   | 146.8   | 125     | 104.5   | 0.457728117 | 103.525   | 121.5     | 17.975  | 0.852057613 | 0.4083   | 1.256  |
| 97666_r_at | 158.3   | 306     | 214.6   | 200     | 294.9   | 247.1   | 176.2   | 331.8   | 0.386545231 | 219.725   | 262.5     | 42.775  | 0.837047619 | 0.3907   | 1.197  |
| 97667_at   | 2.9     | 17      | 9.1     | 4.4     | 4.2     | 2.5     | 1.4     | 16.6    | 0.662638334 | 8.35      | 6.175     | 2.175   | 1.352226721 | 0.4584   | -1.678 |
| 97678_r_at | 5.7     | 5.5     | 1.3     | 0.5     | 1.7     | 0.9     | 3.4     | 3.4     | 0.580380069 | 3.25      | 2.35      | 0.9     | 1.382978723 | 0.9792   | -1.019 |
| 97679_at   | 71.6    | 31.9    | 78.9    | 78.1    | 78.2    | 100.6   | 76      | 97.6    | 0.137676901 | 65.125    | 88.1      | 22.975  | 0.739216799 | 0.174    | 1.427  |
| 97680_at   | 28.3    | 26      | 41      | 29.9    | 41.2    | 27.4    | 32.8    | 28.8    | 0.792859873 | 31.3      | 32.55     | 1.25    | 0.961597542 | 0.7683   | -1.042 |
| 97681_f_at | 4015.9  | 2947.3  | 3684.6  | 3341.6  | 3158.9  | 3378.3  | 3483.4  | 2856.4  | 0.347385858 | 3497.35   | 3219.25   | 278.1   | 1.086386581 | 0.3588   | -1.082 |
| 97682_r_at | 273.3   | 197.3   | 324.5   | 300.8   | 433.7   | 276.4   | 292     | 425     | 0.15871414  | 273.975   | 356.775   | 82.8    | 0.767920959 | 0.1605   | 1.297  |
| 97683_at   | 50      | 21.4    | 66.5    | 53.5    | 58.9    | 58.1    | 66.4    | 14.3    | 0.920981659 | 47.85     | 49.425    | 1.575   | 0.968133536 | 0.9301   | -1.041 |
| 97684_at   | 89.2    | 202.2   | 148.7   | 127.7   | 139     | 175.6   | 187.5   | 117.8   | 0.666314634 | 141.95    | 154.975   | 13.025  | 0.915954186 | 0.592    | -1.12  |
| 97685_at   | 14.1    | 29.5    | 43.3    | 27.2    | 15.3    | 66.1    | 12.7    | 16.5    | 0.953546726 | 28.525    | 27.65     | 0.875   | 1.03164557  | 0.655    | -1.233 |
| 97686_r_at | 660.9   | 611.8   | 753.3   | 573.9   | 501.6   | 544.6   | 400.9   | 521.1   | 0.020740636 | 649.975   | 492.05    | 157.925 | 1.320953155 | 0.02069  | -1.323 |
| 97687_at   | 161.3   | 141.2   | 267.4   | 191.5   | 193.9   | 279.3   | 256.1   | 263.4   | 0.141180281 | 190.35    | 248.175   | 57.825  | 0.766999093 | 0.1251   | 1.33   |
| 97688_at   | 11.2    | 8.7     | 14.3    | 11.7    | 7.7     | 20.1    | 9.5     | 8.3     | 0.982122105 | 11.475    | 11.4      | 0.075   | 1.006578947 | 0.7848   | -1.071 |
| 97689_at   | 225.9   | 127.2   | 151.2   | 252.1   | 126.3   | 194.8   | 123.3   | 228.6   | 0.616823606 | 189.1     | 168.25    | 20.85   | 1.123922734 | 0.6289   | -1.121 |
| 97690_at   | 37.3    | 13      | 36.4    | 35.1    | 17.3    | 45.3    | 33.7    | 28.9    | 0.921066006 | 30.45     | 31.3      | 0.85    | 0.97284345  | 0.8776   | -1.054 |
| 97691_at   | 41.7    | 49.1    | 62      | 39.9    | 76.7    | 9.9     | 48.2    | 82      | 0.746915237 | 48.175    | 54.2      | 6.025   | 0.888837638 | 0.8024   | -1.141 |
| 97692_at   | 0.7     | 1.4     | 2.7     | 1.2     | 7.1     | 1.4     | 4       | 8.1     | 0.092592785 | 1.5       | 5.15      | 3.65    | 0.291262136 | 0.05434  | 3.183  |
| 97693_at   | 12.8    | 16.6    | 40.2    | 17.3    | 7.9     | 16.6    | 49.3    | 42.6    | 0.558296913 | 21.725    | 29.1      | 7.375   | 0.746563574 | 0.7628   | 1.169  |
| 97694_at   | 89.4    | 73.8    | 78.9    | 97.1    | 68.4    | 73.5    | 74.1    | 118     | 0.92318479  | 84.8      | 83.5      | 1.3     | 1.015568862 | 0.8089   | -1.036 |
| 97695_s_at | 17512.3 | 17483.5 | 16282.4 | 14895.4 | 22586.5 | 14590.4 | 17867.2 | 15986.9 | 0.549845189 | 16543.4   | 17757.75  | 1214.35 | 0.931615773 | 0.5815   | -1.061 |
| 97696_r_at | 17182.4 | 19830.6 | 18048.8 | 18008.3 | 32915.8 | 16997.1 | 24219.8 | 19609   | 0.236131966 | 18267.525 | 23435.425 | 5167.9  | 0.77948341  | 0.1864   | 1.245  |
| 97697_at   | 3.5     | 27.4    | 22.7    | 3.8     | 53.4    | 22.3    | 6       | 8.1     | 0.549756676 | 14.35     | 22.45     | 8.1     | 0.639198218 | 0.5359   | 1.633  |
| 97698_at   | 9.9     | 9.4     | 1.3     | 8.6     | 19.7    | 12.9    | 24.5    | 19.5    | 0.009478486 | 7.3       | 19.15     | 11.85   | 0.381201044 | 0.05751  | 3.283  |
| 97699_at   | 209.7   | 342     | 320.7   | 398     | 207.3   | 270.4   | 195.6   | 212.5   | 0.08770249  | 317.6     | 221.45    | 96.15   | 1.434183789 | 0.06892  | -1.408 |
| 97700_at   | 92.6    | 97.6    | 101.1   | 152.3   | 105.6   | 92.1    | 67.2    | 90.6    | 0.230453093 | 110.9     | 88.875    | 22.025  | 1.247819972 | 0.2004   | -1.238 |
| 97701_at   | 149.9   | 135.1   | 221.6   | 154.1   | 274.9   | 187.9   | 239.8   | 196.6   | 0.076503589 | 165.175   | 224.8     | 59.625  | 0.734764235 | 0.06511  | 1.37   |
| 97702_at   | 52.1    | 25.8    | 41.1    | 46.5    | 14.3    | 47.2    | 29.5    | 88      | 0.85192752  | 41.375    | 44.75     | 3.375   | 0.924581006 | 0.8233   | -1.101 |
| 97703_at   | 285.1   | 126.7   | 279.7   | 230.2   | 166.4   | 184.4   | 169.6   | 203.2   | 0.272151538 | 230.425   | 180.9     | 49.525  | 1.273770039 | 0.3514   | -1.218 |
| 97704_at   | 43.8    | 19      | 36.2    | 45.6    | 32.5    | 54.6    | 31.2    | 56.3    | 0.443401028 | 36.15     | 43.65     | 7.5     | 0.828178694 | 0.4584   | 1.228  |
| 97705_at   | 405.7   | 290.1   | 371     | 316.7   | 366.5   | 342     | 232.3   | 284     | 0.358476261 | 345.875   | 306.2     | 39.675  | 1.129572175 | 0.3513   | -1.137 |
| 97706_at   | 47.6    | 54.7    | 60.5    | 53.4    | 80.4    | 122.3   | 107     | 80.8    | 0.020772019 | 54.05     | 97.625    | 43.575  | 0.553649168 | 0.002442 | 1.783  |
| 97707_at   | 26.1    | 34.4    | 28.7    | 34.2    | 36.4    | 55.8    | 42.6    | 25.7    | 0.24005831  | 30.85     | 40.125    | 9.275   | 0.768847352 | 0.2337   | 1.262  |
| 97708_at   | 16.6    | 4.6     | 11      | 31      | 18.9    | 15.3    | 22.9    | 8.9     | 0.917103663 | 15.8      | 16.5      | 0.7     | 0.957575758 | 0.669    | 1.223  |
| 97709_at   | 15      | 1.2     | 2.5     | 2.9     | 3.4     | 3.3     | 22.2    | 1.4     | 0.725234813 | 5.4       | 7.575     | 2.175   | 0.712871287 | 0.7776   | 1.263  |
| 97710_f_at | 121.1   | 224.6   | 243     | 225.9   | 381.8   | 311.4   | 322.3   | 373.7   | 0.007039759 | 203.65    | 347.3     | 143.65  | 0.586380651 | 0.01604  | 1.76   |
| 97711_at   | 246.8   | 204.8   | 202.2   | 261.9   | 201.4   | 344.6   | 250.9   | 208     | 0.570337851 | 228.925   | 251.225   | 22.3    | 0.911234949 | 0.6076   | -1.079 |
| 97712_at   | 51.5    | 19.3    | 68      | 76      | 15      | 44.8    | 19.7    | 43.7    | 0.181927186 | 53.7      | 30.8      | 22.9    | 1.743506494 | 0.2398   | -1.725 |
| 97713_at   | 703.8   | 42.9    | 14      | 26.8    | 16      | 27.7    | 14.5    | 532     | 0.824443389 | 196.875   | 147.55    | 49.325  | 1.33429346  | 0.8126   | -1.35  |
| 97714_r_at | 11.6    | 13.8    | 20.6    | 10.4    | 16.2    | 14      | 14.6    | 15.3    | 0.715594465 | 14.1      | 15.025    | 0.925   | 0.93843594  | 0.5496   | 1.101  |
| 97717_at   | 81      | 120.6   | 105.1   | 124.7   | 122.3   | 105.9   | 103.5   | 122.3   | 0.635756706 | 107.85    | 113.5     | 5.65    | 0.950220264 | 0.5876   | -1.064 |
| 97718_at   | 13.4    | 7.8     | 3.9     | 3.6     | 3       | 2.3     | 2.8     | 2.9     | 0.148003418 | 7.175     | 2.75      | 4.425   | 2.609090909 | 0.04081  | -2.265 |
| 97719_at   | 133.5   | 171.2   | 149.5   | 143.3   | 168.4   | 193.1   | 195.7   | 229     | 0.023502235 | 149.375   | 196.55    | 47.175  | 0.759984737 | 0.01573  | 1.314  |
| 97720_at   | 4.2     | 9.2     | 12.7    | 3.9     | 4.8     | 6.6     | 3.5     | 9.4     | 0.589719926 | 7.5       | 6.075     | 1.425   | 1.234567901 | 0.6863   | -1.165 |
| 97721_at   | 7.7     | 4.4     | 6.1     | 11.1    | 11.6    | 13.5    | 9.1     | 6.6     | 0.214532842 | 7.325     | 10.2      | 2.875   | 0.718137255 | 0.2055   | 1.425  |
| 97722_at   | 934.2   | 671.3   | 694.9   | 678.5   | 663.9   | 908.6   | 501.7   | 751.7   | 0.731525755 | 744.725   | 706.475   | 38.25   | 1.054142043 | 0.6724   | -1.068 |
| 97723_at   | 97.8    | 135     | 127.1   | 170.1   | 123.1   | 156     | 82.4    | 121.4   | 0.598000159 | 132.5     | 120.725   | 11.775  | 1.097535722 | 0.5907   | -1.104 |
| 97724_at   | 156.4   | 202     | 178.9   | 235.1   | 107.7   | 230.2   | 132     | 206.4   | 0.509642098 | 193.1     | 169.075   | 24.025  | 1.142096703 | 0.4301   | -1.184 |
| 97725_at   | 39.7    | 41.7    | 21.2    | 33.2    | 31.5    | 41.4    | 23.4    | 37      | 0.920966504 | 33.95     | 33.325    | 0.625   | 1.018754689 | 0.9699   | -1.008 |
| 97726_at   | 203     | 160     | 250.8   | 183.2   | 245.7   | 163.9   | 211.9   | 190.6   | 0.888979745 | 199.25    | 203.025   | 3.775   | 0.981406231 | 0.8716   | -1.022 |
| 97727_at   | 125.3   | 115.5   | 98      | 93.4    | 149.5   | 65.5    | 118.6   | 127.1   | 0.730563987 | 108.05    | 115.175   | 7.125   | 0.938137617 | 0.8926   | -1.028 |



|            |        |        |        |         |        |        |        |        |             |          |          |          |             |          |        |
|------------|--------|--------|--------|---------|--------|--------|--------|--------|-------------|----------|----------|----------|-------------|----------|--------|
| 97728_at   | 9.5    | 9.8    | 4.4    | 17.3    | 9.2    | 7.5    | 12.2   | 13.1   | 0.936394162 | 10.25    | 10.5     | 0.25     | 0.976190476 | 0.7303   | 1.118  |
| 97729_at   | 6.6    | 5.4    | 6.9    | 4       | 3.2    | 6.2    | 4.2    | 16.3   | 0.606262701 | 5.725    | 7.475    | 1.75     | 0.765886288 | 0.8364   | -1.085 |
| 97730_at   | 18.5   | 16.2   | 88.5   | 14.3    | 84.4   | 51     | 35.5   | 51.4   | 0.35684157  | 34.375   | 55.575   | 21.2     | 0.618533513 | 0.1528   | 2.133  |
| 97731_at   | 4.2    | 10.5   | 9.7    | 3.8     | 21     | 5.5    | 14.9   | 18.3   | 0.099806385 | 7.05     | 14.925   | 7.875    | 0.472361809 | 0.1166   | 2.104  |
| 97732_at   | 69     | 22.5   | 117.1  | 81.4    | 53.9   | 34.8   | 31     | 44.6   | 0.206742092 | 72.5     | 41.075   | 31.425   | 1.765063907 | 0.2912   | -1.546 |
| 97733_at   | 15.8   | 13.4   | 18.7   | 21.7    | 13.5   | 16.6   | 13.5   | 18.8   | 0.450180009 | 17.4     | 15.6     | 1.8      | 1.115384615 | 0.4561   | -1.11  |
| 97734_at   | 15.6   | 15.3   | 28.5   | 58.2    | 48.3   | 36.7   | 45.7   | 65     | 0.157463337 | 29.4     | 48.925   | 19.525   | 0.600919775 | 0.1031   | 1.909  |
| 97735_at   | 7.3    | 2.9    | 4.7    | 3.5     | 2      | 3.6    | 11.7   | 4.8    | 0.712880751 | 4.6      | 5.525    | 0.925    | 0.832579186 | 0.9404   | -1.033 |
| 97736_at   | 33.8   | 64     | 42.6   | 39.9    | 47.6   | 44     | 31.4   | 45.6   | 0.714342641 | 45.075   | 42.15    | 2.925    | 1.069395018 | 0.7681   | -1.052 |
| 97737_f_at | 146.2  | 267.5  | 190.6  | 219.6   | 215.1  | 247.7  | 218.6  | 264    | 0.336729694 | 205.975  | 236.35   | 30.375   | 0.87148297  | 0.2917   | 1.171  |
| 97738_r_at | 207.6  | 294.6  | 326    | 340.2   | 227.1  | 337    | 345.7  | 373.9  | 0.535641794 | 292.1    | 320.925  | 28.825   | 0.910181507 | 0.5728   | 1.099  |
| 97739_at   | 6.2    | 14.6   | 6.9    | 7.5     | 6.2    | 7.1    | 4.2    | 8.6    | 0.347607202 | 8.8      | 6.525    | 2.275    | 1.348659004 | 0.3136   | -1.312 |
| 97740_at   | 410.1  | 405.1  | 478.5  | 374.7   | 326.8  | 421.9  | 431.1  | 402.4  | 0.529176865 | 417.1    | 395.55   | 21.55    | 1.054481102 | 0.5249   | -1.057 |
| 97741_at   | 8.3    | 35.7   | 26.5   | 63.3    | 30.3   | 17.4   | 9.8    | 9.2    | 0.24872026  | 33.45    | 16.675   | 16.775   | 2.005997001 | 0.2944   | -1.797 |
| 97742_s_at | 3.6    | 4      | 3.5    | 2.6     | 7      | 6.7    | 4.1    | 5      | 0.038234199 | 3.425    | 5.7      | 2.275    | 0.600877193 | 0.02082  | 1.629  |
| 97743_at   | 933.4  | 939.4  | 1199.9 | 815.5   | 1134.4 | 970.7  | 1018.6 | 1009.7 | 0.525625616 | 972.05   | 1033.35  | 61.3     | 0.940678376 | 0.4558   | -1.072 |
| 97744_at   | 357.9  | 391.3  | 480.4  | 407.5   | 380.3  | 336.7  | 408.1  | 430    | 0.555887793 | 409.275  | 388.775  | 20.5     | 1.052729728 | 0.5632   | -1.051 |
| 97745_at   | 22.2   | 39.8   | 23.9   | 49.3    | 64     | 18.4   | 23.1   | 34.9   | 0.918782411 | 33.8     | 35.1     | 1.3      | 0.962962963 | 0.95     | -1.022 |
| 97746_f_at | 3      | 2.4    | 1.7    | 1.2     | 5.2    | 3.4    | 1.7    | 2.3    | 0.27456743  | 2.075    | 3.15     | 1.075    | 0.658730159 | 0.2497   | 1.496  |
| 97747_r_at | 546.8  | 554    | 752.8  | 634.5   | 1055.2 | 627.7  | 778.6  | 757.3  | 0.138334496 | 622.025  | 804.7    | 182.675  | 0.772989934 | 0.1064   | 1.282  |
| 97748_at   | 6      | 8.1    | 23     | 14.8    | 10     | 11.7   | 9.4    | 19.3   | 0.936355445 | 12.975   | 12.6     | 0.375    | 1.029761905 | 0.8569   | -1.067 |
| 97749_at   | 31.4   | 43.9   | 25.8   | 49.3    | 28.2   | 37.6   | 27.8   | 30.4   | 0.324915696 | 37.6     | 31       | 6.6      | 1.212903226 | 0.3474   | -1.183 |
| 97750_at   | 6461.6 | 5324.5 | 5274.7 | 4677.9  | 6565.7 | 4656   | 5216.4 | 5824.6 | 0.820976521 | 5434.675 | 5565.675 | 131      | 0.976462873 | 0.8287   | -1.023 |
| 97751_f_at | 916.6  | 873.1  | 846.7  | 865.8   | 1054.4 | 625.7  | 864.1  | 870.6  | 0.821317208 | 875.55   | 853.7    | 21.85    | 1.025594471 | 0.7156   | -1.043 |
| 97752_at   | 14.2   | 7.2    | 40.6   | 4.6     | 9.8    | 20.1   | 9.8    | 23.8   | 0.935307508 | 16.65    | 15.875   | 0.775    | 1.048818898 | 0.6886   | 1.249  |
| 97753_at   | 5      | 24.2   | 7.2    | 5.5     | 42.3   | 30     | 9.6    | 43.5   | 0.072331343 | 10.475   | 31.35    | 20.875   | 0.334130781 | 0.05981  | 3.24   |
| 97754_at   | 49.2   | 70.8   | 100.1  | 50.8    | 19.3   | 62.9   | 21.5   | 102.1  | 0.510148248 | 67.725   | 51.45    | 16.275   | 1.316326531 | 0.3237   | -1.606 |
| 97755_at   | 168.3  | 151.7  | 174.9  | 191.3   | 187    | 166.4  | 238.9  | 208    | 0.169926082 | 171.55   | 200.075  | 28.525   | 0.857428464 | 0.1534   | 1.16   |
| 97756_s_at | 22.7   | 23.8   | 24.9   | 19.7    | 16.3   | 15.4   | 13.5   | 11.9   | 0.001326371 | 22.775   | 14.275   | 8.5      | 1.595446585 | 0.001513 | -1.603 |
| 97757_at   | 5      | 5.1    | 5.4    | 20.5    | 8.2    | 7.5    | 4.8    | 13.6   | 0.916104519 | 9        | 8.525    | 0.475    | 1.055718475 | 0.8326   | 1.093  |
| 97758_at   | 9846.8 | 9633.5 | 9866.6 | 10013.6 | 7952.1 | 9049.1 | 7802.5 | 9434.5 | 0.047550991 | 9840.125 | 8559.55  | 1280.575 | 1.149607748 | 0.02429  | -1.153 |
| 97759_at   | 238.2  | 238.1  | 248.9  | 349.8   | 324.1  | 334.8  | 280.4  | 410.2  | 0.12305238  | 268.75   | 337.375  | 68.625   | 0.79659133  | 0.1053   | 1.261  |
| 97760_at   | 85.4   | 66.6   | 82.2   | 75.6    | 65.8   | 84.3   | 63.2   | 56.1   | 0.221902961 | 77.45    | 67.35    | 10.1     | 1.14996288  | 0.2003   | -1.158 |
| 97761_f_at | 41.7   | 67.4   | 66.4   | 67.6    | 69     | 74.9   | 60.6   | 56.8   | 0.573048214 | 60.775   | 65.325   | 4.55     | 0.930348259 | 0.548    | -1.089 |
| 97762_f_at | 46     | 10.1   | 58.8   | 36.2    | 42.2   | 27.4   | 54     | 22     | 0.917156266 | 37.775   | 36.4     | 1.375    | 1.037774725 | 0.8566   | -1.087 |
| 97763_at   | 93.7   | 22.4   | 23.7   | 77      | 28.9   | 112.9  | 56.6   | 42.5   | 0.824372255 | 54.2     | 60.225   | 6.025    | 0.899958489 | 0.7195   | 1.196  |
| 97764_at   | 6.9    | 1.7    | 1.6    | 1.3     | 2.8    | 0.9    | 2.8    | 15.3   | 0.511677564 | 2.875    | 5.45     | 2.575    | 0.527522936 | 0.6441   | 1.405  |
| 97765_g_at | 15.5   | 5.7    | 4.5    | 4       | 2.7    | 4.3    | 7.5    | 5.9    | 0.469975945 | 7.425    | 5.1      | 2.325    | 1.455882353 | 0.4845   | -1.325 |
| 97766_at   | 2.4    | 3.5    | 4.2    | 2.2     | 37.2   | 3.1    | 2.3    | 5.2    | 0.370389272 | 3.075    | 11.95    | 8.875    | 0.257322176 | 0.313    | 2.039  |
| 97767_at   | 328.3  | 321.8  | 395.3  | 227.2   | 373.3  | 316.2  | 294.3  | 504.5  | 0.395172139 | 318.15   | 372.075  | 53.925   | 0.855069542 | 0.3924   | 1.166  |
| 97768_at   | 29.2   | 3.6    | 18.4   | 21.2    | 30.4   | 30.2   | 18.3   | 16.2   | 0.423393749 | 18.1     | 23.775   | 5.675    | 0.761303891 | 0.3776   | 1.603  |
| 97769_at   | 52.5   | 56.8   | 11.1   | 53.2    | 44.9   | 44.4   | 65.1   | 80.7   | 0.313067735 | 43.4     | 58.775   | 15.375   | 0.738409188 | 0.3322   | 1.56   |
| 97770_s_at | 738.3  | 899.7  | 683    | 951     | 710.3  | 722.8  | 784.9  | 829.3  | 0.464124629 | 818      | 761.825  | 56.175   | 1.073737407 | 0.4894   | -1.066 |
| 97771_r_at | 65.1   | 42.7   | 41.6   | 53.5    | 57.7   | 29.7   | 49.5   | 5.7    | 0.300842716 | 50.725   | 35.65    | 15.075   | 1.42286115  | 0.2829   | -1.891 |
| 97772_at   | 36.6   | 46.5   | 56.4   | 64.2    | 69     | 64.7   | 77.2   | 78     | 0.029049778 | 50.925   | 72.225   | 21.3     | 0.705088266 | 0.03022  | 1.445  |
| 97773_at   | 1161.4 | 833.3  | 1207.7 | 1008.5  | 934.5  | 1318.9 | 1007   | 912.7  | 0.942915585 | 1052.725 | 1043.275 | 9.45     | 1.009058014 | 0.9358   | -1.01  |
| 97774_at   | 7.3    | 5.9    | 2.3    | 3.3     | 6      | 6.6    | 3.3    | 8.1    | 0.427833839 | 4.7      | 6        | 1.3      | 0.783333333 | 0.4097   | 1.338  |
| 97775_at   | 71.6   | 79.1   | 109.2  | 98.9    | 122    | 115.9  | 94.8   | 103.2  | 0.125291831 | 89.7     | 108.975  | 19.275   | 0.82312457  | 0.1206   | 1.227  |
| 97776_at   | 60.3   | 84.2   | 77.8   | 85.1    | 86.4   | 81.6   | 108.5  | 51     | 0.720633118 | 76.85    | 81.875   | 5.025    | 0.938625954 | 0.842    | -1.038 |
| 97777_at   | 22.8   | 17.9   | 15.7   | 19.7    | 21     | 19.2   | 13.4   | 20.4   | 0.82705963  | 19.025   | 18.5     | 0.525    | 1.028378378 | 0.8025   | -1.034 |
| 97778_at   | 6.7    | 58.5   | 26.3   | 50.6    | 52.2   | 39.5   | 34.3   | 15.5   | 0.991882076 | 35.525   | 35.375   | 0.15     | 1.004240283 | 0.7501   | 1.205  |
| 97779_at   | 6.4    | 9.9    | 10.4   | 11.2    | 16.9   | 8.6    | 3.9    | 5.6    | 0.825701018 | 9.475    | 8.75     | 0.725    | 1.082857143 | 0.5589   | -1.232 |
| 97780_at   | 5.7    | 3.7    | 9.3    | 29.9    | 26.6   | 21     | 4      | 33.1   | 0.338260472 | 12.15    | 21.175   | 9.025    | 0.573789847 | 0.3725   | 1.888  |
| 97781_at   | 3      | 2.9    | 27.4   | 3.8     | 2.6    | 11.3   | 5.9    | 23     | 0.856489635 | 9.275    | 10.7     | 1.425    | 0.86682243  | 0.6197   | 1.452  |
| 97782_at   | 87.5   | 73.8   | 119.5  | 71.2    | 179.3  | 64.3   | 166.7  | 72.3   | 0.372782356 | 88       | 120.65   | 32.65    | 0.729382511 | 0.4616   | 1.261  |
| 97783_at   | 1357.4 | 1148.3 | 898.9  | 972.5   | 3473.4 | 1897.5 | 2159.4 | 2800.8 | 0.020037021 | 1094.275 | 2582.775 | 1488.5   | 0.423681893 | 0.002063 | 2.326  |



|            |        |        |        |        |        |        |        |        |             |          |          |         |             |          |        |
|------------|--------|--------|--------|--------|--------|--------|--------|--------|-------------|----------|----------|---------|-------------|----------|--------|
| 97784_at   | 98.3   | 90.3   | 170    | 87.2   | 162.8  | 68.8   | 87.4   | 141.5  | 0.905328034 | 111.45   | 115.125  | 3.675   | 0.968078176 | 0.9622   | -1.013 |
| 97785_at   | 56.3   | 57.8   | 82.2   | 59.7   | 116.4  | 81.4   | 114.2  | 74.9   | 0.048813291 | 64       | 96.725   | 32.725  | 0.661669682 | 0.03026  | 1.501  |
| 97786_at   | 90.4   | 80.8   | 142.7  | 201    | 125.2  | 65.4   | 73.1   | 151    | 0.497323944 | 128.725  | 103.675  | 25.05   | 1.241620449 | 0.4999   | -1.234 |
| 97787_at   | 43.5   | 45.8   | 55.5   | 49.1   | 43.5   | 38     | 50.2   | 57.5   | 0.822076603 | 48.475   | 47.3     | 1.175   | 1.024841438 | 0.7711   | -1.032 |
| 97788_at   | 92.2   | 51.5   | 102    | 52.2   | 83.9   | 111    | 160.8  | 120.2  | 0.076655437 | 74.475   | 118.975  | 44.5    | 0.625971843 | 0.07297  | 1.633  |
| 97789_at   | 15.3   | 16.1   | 31.6   | 27.9   | 35.1   | 24.6   | 24.5   | 24.7   | 0.399249046 | 22.725   | 27.225   | 4.5     | 0.834710744 | 0.3273   | 1.245  |
| 97790_s_at | 369.1  | 341.9  | 364.7  | 434.8  | 192.2  | 277.2  | 241.3  | 290.9  | 0.005333187 | 377.625  | 250.4    | 127.225 | 1.508087061 | 0.007519 | -1.521 |
| 97791_at   | 521.7  | 975.6  | 899.9  | 816.5  | 632.9  | 807.3  | 736.1  | 574.3  | 0.353941366 | 803.425  | 687.65   | 115.775 | 1.168363266 | 0.4215   | -1.147 |
| 97792_at   | 12.4   | 7.4    | 26.4   | 19.1   | 13     | 35.5   | 12.2   | 7.7    | 0.921391889 | 16.325   | 17.1     | 0.775   | 0.954678363 | 0.9717   | -1.016 |
| 97793_at   | 13.9   | 20.5   | 21.3   | 39.3   | 30     | 32.5   | 16     | 45.4   | 0.408119083 | 23.75    | 30.975   | 7.225   | 0.766747377 | 0.4068   | 1.314  |
| 97794_at   | 124.2  | 152.8  | 123.1  | 160.5  | 129.8  | 155.1  | 122.8  | 164.2  | 0.844973856 | 140.15   | 142.975  | 2.825   | 0.980241301 | 0.8464   | -1.02  |
| 97795_at   | 44.4   | 25.5   | 50.1   | 27.4   | 51.9   | 48.4   | 65.6   | 17.9   | 0.474994422 | 36.85    | 45.95    | 9.1     | 0.801958651 | 0.6469   | 1.174  |
| 97796_at   | 70.1   | 75.1   | 74.6   | 57.8   | 38.9   | 74     | 60.7   | 44.1   | 0.163323248 | 69.4     | 54.425   | 14.975  | 1.275149288 | 0.1408   | -1.31  |
| 97797_at   | 1936.8 | 1508.5 | 1606.2 | 1808.9 | 1168.8 | 1663.3 | 1304.4 | 1595   | 0.114970951 | 1715.1   | 1432.875 | 282.225 | 1.196964146 | 0.1156   | -1.204 |
| 97798_at   | 592.1  | 577.1  | 464.4  | 458.9  | 582.8  | 485.6  | 637.2  | 729.5  | 0.223399196 | 523.125  | 608.775  | 85.65   | 0.859307626 | 0.2253   | 1.159  |
| 97800_at   | 534.8  | 731.5  | 637.7  | 572.2  | 936.2  | 462.2  | 625.3  | 750.5  | 0.531213103 | 619.05   | 693.55   | 74.5    | 0.892581645 | 0.611    | 1.092  |
| 97802_at   | 359.3  | 241.8  | 333.2  | 474.1  | 308.9  | 295    | 300.4  | 416.2  | 0.710448042 | 352.1    | 330.125  | 21.975  | 1.066565695 | 0.7811   | -1.048 |
| 97803_at   | 1512.5 | 1325.1 | 1480.8 | 1344.7 | 1255.5 | 1372.7 | 1219.3 | 1456.6 | 0.2607193   | 1415.775 | 1326.025 | 89.75   | 1.06768349  | 0.2554   | -1.069 |
| 97807_at   | 1023.7 | 1262.7 | 1101.2 | 927.9  | 1171.7 | 1099.7 | 1035.3 | 1084.2 | 0.817010542 | 1078.875 | 1097.725 | 18.85   | 0.982828122 | 0.7561   | -1.023 |
| 97808_at   | 3092.9 | 2404.5 | 2362.6 | 3293.9 | 2492.3 | 2554   | 1970.9 | 2894.8 | 0.349215119 | 2788.475 | 2478     | 310.475 | 1.125292575 | 0.3582   | -1.124 |
| 97809_at   | 697.6  | 1481.3 | 1066.7 | 920.9  | 924.6  | 1179.9 | 1094.3 | 1356.3 | 0.628866483 | 1041.625 | 1138.775 | 97.15   | 0.91468903  | 0.5317   | 1.124  |
| 97811_at   | 426.9  | 467.6  | 285.1  | 372.7  | 266.7  | 382.6  | 407.3  | 505.9  | 0.969096763 | 388.075  | 390.625  | 2.55    | 0.993472    | 0.9903   | -1.002 |
| 97812_at   | 238.4  | 350.2  | 276.6  | 342.9  | 260.5  | 277.1  | 296.2  | 349.9  | 0.860761437 | 302.025  | 295.925  | 6.1     | 1.020613331 | 0.9032   | -1.014 |
| 97813_at   | 985.2  | 1915.8 | 1377.7 | 1667.6 | 1248.2 | 1461.9 | 1448.2 | 1383.8 | 0.653944836 | 1486.575 | 1385.525 | 101.05  | 1.072932643 | 0.7837   | -1.044 |
| 97814_at   | 144.6  | 149.5  | 209.3  | 215.2  | 195.8  | 169.6  | 156.4  | 245.5  | 0.670990332 | 179.65   | 191.825  | 12.175  | 0.936530692 | 0.6593   | -1.07  |
| 97816_at   | 219.2  | 237.2  | 227.2  | 309.9  | 244.3  | 314    | 208.1  | 338.9  | 0.479505959 | 248.375  | 276.325  | 27.95   | 0.898850991 | 0.5041   | -1.103 |
| 97817_at   | 1058.8 | 1394.1 | 1216.6 | 1307.2 | 1013.9 | 980.3  | 1086.3 | 911.2  | 0.032542328 | 1244.175 | 997.925  | 246.25  | 1.246762031 | 0.02028  | -1.243 |
| 97818_at   | 3092   | 2513.8 | 3103   | 3068.4 | 2644.2 | 2972   | 3262.5 | 2713.1 | 0.825268173 | 2944.3   | 2897.95  | 46.35   | 1.015994065 | 0.8325   | -1.016 |
| 97819_at   | 1120   | 985.5  | 944.9  | 974.1  | 1213.2 | 873.9  | 1019.6 | 1196.4 | 0.475417417 | 1006.125 | 1075.775 | 69.65   | 0.935255978 | 0.5082   | -1.062 |
| 97820_at   | 674.7  | 797.6  | 696.3  | 789.6  | 808.5  | 787.2  | 815.9  | 656    | 0.597375938 | 739.55   | 766.9    | 27.35   | 0.964336941 | 0.6177   | -1.036 |
| 97821_at   | 318.9  | 414    | 272.5  | 354.1  | 304.5  | 422.2  | 574.8  | 231.5  | 0.619866703 | 339.875  | 383.25   | 43.375  | 0.886823222 | 0.7448   | -1.076 |
| 97822_at   | 522.2  | 676.8  | 716.1  | 541.9  | 454.1  | 522.3  | 462.4  | 586.6  | 0.117200664 | 614.25   | 506.35   | 107.9   | 1.21309371  | 0.104    | -1.208 |
| 97823_g_at | 564    | 635.1  | 749.8  | 755.5  | 552.5  | 601.9  | 651    | 738.2  | 0.535549947 | 676.1    | 635.9    | 40.2    | 1.063217487 | 0.5468   | -1.062 |
| 97824_at   | 3421   | 2517.8 | 2583.7 | 2282.3 | 2420   | 2448   | 2637.9 | 2108.4 | 0.332991802 | 2701.2   | 2403.575 | 297.625 | 1.123825968 | 0.3145   | -1.114 |
| 97825_at   | 49.9   | 40.3   | 19.4   | 36.9   | 62.1   | 61.6   | 54.3   | 105    | 0.052371711 | 36.625   | 70.75    | 34.125  | 0.517667845 | 0.03511  | 1.973  |
| 97826_at   | 84.6   | 73.9   | 87.5   | 114.4  | 110    | 105.6  | 148.3  | 120.1  | 0.0539912   | 90.1     | 121      | 30.9    | 0.744628099 | 0.04517  | 1.349  |
| 97828_at   | 3600   | 3025.1 | 2984.9 | 2453.4 | 3232.9 | 2274.6 | 2345.6 | 2172.4 | 0.18345102  | 3015.85  | 2506.375 | 509.475 | 1.203271657 | 0.1658   | -1.208 |
| 97829_at   | 1007.8 | 775.2  | 1007   | 1051.7 | 782    | 1001.5 | 871.8  | 1026.5 | 0.654338441 | 960.425  | 920.45   | 39.975  | 1.043429844 | 0.6755   | -1.042 |
| 97830_at   | 131.7  | 142.1  | 192.9  | 205.6  | 192.1  | 192.1  | 266.4  | 238.7  | 0.081232964 | 168.075  | 222.325  | 54.25   | 0.755987856 | 0.08073  | 1.334  |
| 97832_at   | 73.2   | 49.8   | 71.5   | 40.3   | 61.9   | 90.1   | 67.9   | 69.1   | 0.235349474 | 58.7     | 72.25    | 13.55   | 0.812456747 | 0.2183   | 1.256  |
| 97833_at   | 72.8   | 76.9   | 103.7  | 42.6   | 61.1   | 75.8   | 80.2   | 101.4  | 0.722903532 | 74       | 79.625   | 5.625   | 0.929356358 | 0.6383   | 1.111  |
| 97834_g_at | 74.4   | 57.5   | 82     | 77.1   | 80.1   | 106.7  | 111.3  | 84.5   | 0.057258934 | 72.75    | 95.65    | 22.9    | 0.760585468 | 0.05355  | 1.313  |
| 97835_at   | 1991.9 | 2367.9 | 2306.9 | 2492.5 | 5143.7 | 2123.6 | 2939.1 | 2536.7 | 0.276370483 | 2289.8   | 3185.775 | 895.975 | 0.718757602 | 0.2126   | 1.316  |
| 97836_at   | 424.7  | 360.3  | 545.7  | 774.9  | 525.4  | 541    | 505.3  | 580.6  | 0.907310308 | 526.4    | 538.075  | 11.675  | 0.978302281 | 0.721    | -1.065 |
| 97838_at   | 1833.5 | 1452   | 1401.1 | 1551.4 | 1112.8 | 1616.9 | 1322.3 | 1593.3 | 0.374430187 | 1559.5   | 1411.325 | 148.175 | 1.104989992 | 0.359    | -1.112 |
| 97839_at   | 5044.8 | 3351.1 | 3612.5 | 4186.7 | 3293.5 | 3366   | 3727.7 | 4096.8 | 0.359485905 | 4048.775 | 3621     | 427.775 | 1.118137255 | 0.3567   | -1.109 |
| 97841_at   | 1982.8 | 1487   | 1637.7 | 1586.5 | 1789   | 1633.8 | 1723.5 | 1718.6 | 0.725532649 | 1673.5   | 1716.225 | 42.725  | 0.975105246 | 0.6529   | -1.031 |
| 97843_at   | 1927.4 | 1412.9 | 1551   | 1588.7 | 1369.1 | 1689.3 | 1657.9 | 1565.6 | 0.720042927 | 1620     | 1570.475 | 49.525  | 1.031535045 | 0.7415   | -1.028 |
| 97844_at   | 1423.5 | 1034.4 | 912.4  | 1140.1 | 1611.9 | 1673.1 | 1716.5 | 1451.3 | 0.01317687  | 1127.6   | 1613.2   | 485.6   | 0.698983387 | 0.01057  | 1.447  |
| 97845_at   | 933.9  | 1112.1 | 1073.4 | 991.5  | 876.5  | 1033.1 | 1150.4 | 1174.4 | 0.71261164  | 1027.725 | 1058.6   | 30.875  | 0.970834121 | 0.7551   | -1.026 |
| 97846_at   | 1633   | 1091.9 | 1313.5 | 1433.9 | 1045.9 | 1206   | 1354.8 | 1133   | 0.22242813  | 1368.075 | 1184.925 | 183.15  | 1.154566745 | 0.22     | -1.148 |
| 97847_at   | 495.9  | 533.8  | 366.7  | 488.6  | 434.4  | 364.3  | 415.7  | 243.1  | 0.107694902 | 471.25   | 364.375  | 106.875 | 1.293310463 | 0.1318   | -1.312 |
| 97848_at   | 240.3  | 300.7  | 335.5  | 315.2  | 263.7  | 441.9  | 334.4  | 405.7  | 0.218986673 | 297.925  | 361.425  | 63.5    | 0.824306564 | 0.2291   | 1.199  |
| 97849_at   | 66.2   | 70.1   | 48.7   | 78.3   | 57.2   | 56.4   | 47.4   | 40.2   | 0.089513643 | 65.825   | 50.3     | 15.525  | 1.308648111 | 0.09141  | -1.302 |
| 97853_at   | 872.8  | 820    | 761.7  | 923.2  | 562.6  | 765.4  | 656.5  | 772.2  | 0.047722855 | 844.425  | 689.175  | 155.25  | 1.225269344 | 0.05039  | -1.232 |
| 97857_at   | 535.3  | 565.7  | 542    | 498.9  | 398.6  | 493.6  | 412.3  | 614    | 0.346550016 | 535.475  | 479.625  | 55.85   | 1.116445139 | 0.2712   | -1.132 |



|            |        |        |        |        |        |        |        |        |             |          |          |         |             |         |        |
|------------|--------|--------|--------|--------|--------|--------|--------|--------|-------------|----------|----------|---------|-------------|---------|--------|
| 97858_at   | 834.2  | 807.7  | 896.2  | 733.7  | 860.2  | 866.8  | 869.6  | 753.7  | 0.670303293 | 817.95   | 837.575  | 19.625  | 0.976569262 | 0.666   | -1.025 |
| 97859_at   | 1098.4 | 1109.8 | 1036.9 | 1277.8 | 1021   | 1256.7 | 1137.7 | 1563   | 0.420527396 | 1130.725 | 1244.6   | 113.875 | 0.90850474  | 0.4252  | -1.09  |
| 97860_at   | 442.4  | 429.7  | 568.5  | 472.3  | 655.8  | 501.3  | 581.1  | 512.7  | 0.126497662 | 478.225  | 562.725  | 84.5    | 0.849837843 | 0.1149  | 1.177  |
| 97861_at   | 36.4   | 40.5   | 53.8   | 36.6   | 9.8    | 29.6   | 37.3   | 19.6   | 0.055224539 | 41.825   | 24.075   | 17.75   | 1.737279335 | 0.0774  | -1.922 |
| 97862_s_at | 817.3  | 811.7  | 855.3  | 702.5  | 643.7  | 777.9  | 767.9  | 677.1  | 0.137652318 | 796.7    | 716.65   | 80.05   | 1.111700272 | 0.1433  | -1.112 |
| 97863_at   | 633    | 620.6  | 663.9  | 554.1  | 483.1  | 655.8  | 463.2  | 544.1  | 0.16379816  | 617.9    | 536.55   | 81.35   | 1.151616811 | 0.1383  | -1.16  |
| 97864_at   | 244.1  | 217.8  | 225.2  | 210.9  | 179.6  | 271.2  | 229.3  | 137.3  | 0.545357441 | 224.5    | 204.35   | 20.15   | 1.098605334 | 0.4425  | -1.133 |
| 97865_g_at | 1303.1 | 1305.4 | 1289.7 | 1394   | 926.3  | 1445   | 1222   | 1117.4 | 0.273197202 | 1323.05  | 1177.675 | 145.375 | 1.123442376 | 0.2213  | -1.137 |
| 97866_at   | 2000   | 1648.1 | 2001.4 | 1997.7 | 1733.6 | 1922.4 | 2007.2 | 2002.8 | 0.967053873 | 1911.8   | 1916.5   | 4.7     | 0.997547613 | 0.9473  | -1.004 |
| 97867_at   | 39.7   | 65.6   | 88.6   | 106.6  | 114.8  | 62.4   | 74.3   | 77.4   | 0.713499295 | 75.125   | 82.225   | 7.1     | 0.913651566 | 0.6262  | 1.137  |
| 97868_at   | 901.8  | 925.3  | 794.7  | 1018.5 | 892.3  | 815.1  | 737    | 746.7  | 0.105567755 | 910.075  | 797.775  | 112.3   | 1.140766507 | 0.1014  | -1.14  |
| 97869_at   | 838.8  | 699.2  | 695.6  | 600.9  | 566.5  | 759.5  | 680.3  | 672.1  | 0.559410287 | 708.625  | 669.6    | 39.025  | 1.058281063 | 0.5687  | -1.057 |
| 97870_s_at | 636.4  | 484.2  | 770.3  | 694.8  | 421.8  | 605.5  | 628.4  | 689.6  | 0.499559997 | 646.425  | 586.325  | 60.1    | 1.102502878 | 0.5219  | -1.105 |
| 97871_at   | 642.6  | 490.2  | 702    | 656.6  | 488.4  | 557.7  | 615.4  | 804.8  | 0.941830211 | 622.85   | 616.575  | 6.275   | 1.010177189 | 0.894   | -1.019 |
| 97873_at   | 249.1  | 166.9  | 252.1  | 295.9  | 326.1  | 217.5  | 224.6  | 294    | 0.540191944 | 241      | 265.55   | 24.55   | 0.907550367 | 0.5376  | -1.109 |
| 97874_at   | 948.8  | 798    | 718    | 689.3  | 1759.7 | 928.5  | 1025.6 | 715    | 0.257139714 | 788.525  | 1107.2   | 318.675 | 0.712179371 | 0.2008  | 1.337  |
| 97875_at   | 1220.2 | 1663.9 | 1338.6 | 1289.1 | 1434   | 1569.4 | 1482.7 | 1428.2 | 0.391382433 | 1377.95  | 1478.575 | 100.625 | 0.931944609 | 0.3228  | -1.08  |
| 97876_at   | 1548.1 | 1330.8 | 1696.8 | 1188   | 1698.7 | 1373.7 | 1383.7 | 1051.6 | 0.725637613 | 1440.925 | 1376.925 | 64      | 1.046480382 | 0.7036  | -1.052 |
| 97880_at   | 1026.3 | 1266.8 | 911.8  | 1176.7 | 784    | 1055   | 1105.8 | 1226   | 0.681703257 | 1095.4   | 1042.7   | 52.7    | 1.050541862 | 0.6664  | -1.056 |
| 97882_at   | 3052.3 | 3237.1 | 2938.1 | 2599.2 | 3193.8 | 2861.9 | 3204.4 | 2679.8 | 0.884172895 | 2956.675 | 2984.975 | 28.3    | 0.990519184 | 0.8824  | -1.01  |
| 97884_at   | 1228.7 | 1228.9 | 1077.5 | 1175   | 1956.1 | 1143.7 | 1427   | 1376.1 | 0.180095994 | 1177.525 | 1475.725 | 298.2   | 0.797929831 | 0.1221  | 1.231  |
| 97885_at   | 3334.7 | 2989.3 | 3342.2 | 2773.5 | 3617.7 | 3338.1 | 3615.2 | 3641.5 | 0.041365505 | 3109.925 | 3553.125 | 443.2   | 0.875264732 | 0.03455 | 1.145  |
| 97886_at   | 295.1  | 240.7  | 228.6  | 334.2  | 263.7  | 224.4  | 254    | 343.1  | 0.927478017 | 274.65   | 271.3    | 3.35    | 1.012347954 | 0.9227  | -1.013 |
| 97887_at   | 84.7   | 93.7   | 75.7   | 48.8   | 118.5  | 120.8  | 146.3  | 72.2   | 0.086387985 | 75.725   | 114.45   | 38.725  | 0.661642639 | 0.09632 | 1.507  |
| 97888_at   | 1067.1 | 842.7  | 1089.4 | 1038   | 1119.9 | 1507.9 | 1322.8 | 1216.1 | 0.035360621 | 1009.3   | 1291.675 | 282.375 | 0.781388507 | 0.03004 | 1.278  |
| 97889_at   | 2.6    | 23.1   | 5.6    | 18.6   | 13.5   | 14.8   | 27.7   | 15.6   | 0.402399718 | 12.475   | 17.9     | 5.425   | 0.696927374 | 0.2698  | 1.923  |
| 97890_at   | 514.9  | 411.8  | 407.7  | 439.8  | 380.3  | 569.4  | 410.6  | 466    | 0.798940715 | 443.55   | 456.575  | 13.025  | 0.971472376 | 0.8425  | -1.022 |
| 97891_at   | 479.8  | 609.6  | 531    | 461.7  | 647.2  | 463.6  | 612    | 632    | 0.254134505 | 520.525  | 588.7    | 68.175  | 0.884193987 | 0.2717  | 1.128  |
| 97892_at   | 454.9  | 389    | 414.5  | 411    | 244.2  | 533.5  | 394.7  | 316.7  | 0.524223244 | 417.35   | 372.275  | 45.075  | 1.121079847 | 0.3972  | -1.167 |
| 97893_at   | 302.5  | 201.4  | 220.7  | 267.6  | 275.3  | 353.4  | 234.1  | 216.5  | 0.589819222 | 248.05   | 269.825  | 21.775  | 0.919299546 | 0.5986  | -1.082 |
| 97894_at   | 376    | 929.9  | 596.9  | 728.7  | 623.9  | 706.6  | 722    | 608    | 0.9551457   | 657.875  | 665.125  | 7.25    | 0.989099793 | 0.7698  | -1.062 |
| 97895_f_at | 2954.3 | 1824.6 | 2269   | 1765.6 | 1917.9 | 2007.3 | 2278.2 | 1785.7 | 0.522647192 | 2203.375 | 1997.275 | 206.1   | 1.103190597 | 0.5576  | -1.084 |
| 97896_r_at | 1138.3 | 735.7  | 814.8  | 944.8  | 528.2  | 783.8  | 636.6  | 1034.5 | 0.292984061 | 908.4    | 745.775  | 162.625 | 1.218061748 | 0.2591  | -1.24  |
| 97897_at   | 659.9  | 872.4  | 707.5  | 878.4  | 706.6  | 770.7  | 794.8  | 875.8  | 0.915032258 | 779.55   | 786.975  | 7.425   | 0.990565139 | 0.8715  | -1.015 |
| 97900_at   | 705.4  | 517.1  | 586.3  | 658    | 597.7  | 624    | 634.9  | 541.6  | 0.727601445 | 616.7    | 599.55   | 17.15   | 1.028604787 | 0.7733  | -1.023 |
| 97901_at   | 1317.8 | 1530.3 | 1445.6 | 1374.5 | 1657   | 1434.6 | 1406.7 | 1450.2 | 0.378611424 | 1417.05  | 1487.125 | 70.075  | 0.952878877 | 0.3708  | -1.049 |
| 97903_at   | 995.8  | 1431.3 | 1453.8 | 1403.1 | 1169.7 | 1204.7 | 1133.7 | 1402.5 | 0.488928368 | 1321     | 1227.65  | 93.35   | 1.076039588 | 0.5474  | -1.067 |
| 97904_at   | 3645.6 | 3983.8 | 4102.8 | 4100.6 | 3387.6 | 3865.3 | 4011.6 | 4050.2 | 0.516382167 | 3958.2   | 3828.675 | 129.525 | 1.033830242 | 0.5128  | -1.035 |
| 97906_at   | 133    | 167.4  | 222.6  | 177.3  | 150.9  | 209.8  | 177.1  | 168.8  | 0.946085414 | 175.075  | 176.65   | 1.575   | 0.991084065 | 0.8886  | -1.019 |
| 97907_at   | 4154.2 | 3753.6 | 4071.8 | 3299.6 | 5671.2 | 3353.1 | 4195.5 | 3535.2 | 0.548304638 | 3819.8   | 4188.75  | 368.95  | 0.91191883  | 0.5866  | -1.077 |
| 97908_at   | 799.7  | 949.3  | 913.2  | 992.9  | 756.8  | 939.1  | 881.7  | 1076.8 | 0.99830107  | 913.775  | 913.6    | 0.175   | 1.00019155  | 0.9564  | -1.005 |
| 97909_at   | 7228.6 | 8164.4 | 7199.2 | 6079.3 | 7198.7 | 6492.8 | 7139.1 | 5943.9 | 0.40055725  | 7167.875 | 6693.625 | 474.25  | 1.070850996 | 0.4155  | -1.068 |
| 97910_at   | 5.3    | 6.2    | 7.7    | 4.1    | 13.9   | 5.4    | 19     | 2.3    | 0.344107297 | 5.825    | 10.15    | 4.325   | 0.573891626 | 0.5805  | 1.336  |
| 97911_at   | 1364.5 | 1249.3 | 1304.5 | 1214.6 | 1755.4 | 1279.1 | 1395.7 | 1267.6 | 0.30858026  | 1283.225 | 1424.45  | 141.225 | 0.900856471 | 0.2729  | -1.101 |
| 97912_at   | 58.7   | 61.9   | 91.3   | 55.6   | 79.4   | 107.8  | 61.3   | 57.3   | 0.526356684 | 66.875   | 76.45    | 9.575   | 0.874754742 | 0.5276  | 1.13   |
| 97914_at   | 2540.4 | 2359.5 | 2348.9 | 2278.8 | 2299.5 | 2503.1 | 2528   | 2353.1 | 0.638904368 | 2381.9   | 2420.925 | 39.025  | 0.983880128 | 0.6372  | -1.016 |
| 97915_at   | 628.2  | 509.1  | 504.5  | 525.5  | 465.4  | 489.8  | 549.5  | 579.6  | 0.616348978 | 541.825  | 521.075  | 20.75   | 1.039821523 | 0.6093  | -1.04  |
| 97916_at   | 1481.4 | 1441.5 | 1546.4 | 1641.7 | 1372.9 | 1633.4 | 1542.8 | 1469.2 | 0.753957878 | 1527.75  | 1504.575 | 23.175  | 1.015403021 | 0.7409  | -1.016 |
| 97917_at   | 1469.4 | 1442.1 | 1374.3 | 1254.4 | 2870.6 | 1255.5 | 1543.2 | 1253.5 | 0.437882661 | 1385.05  | 1730.7   | 345.65  | 0.800283122 | 0.448   | 1.175  |
| 97918_at   | 388.8  | 545.9  | 444.6  | 492.1  | 575.2  | 459.5  | 446.7  | 530.4  | 0.467019424 | 467.85   | 502.95   | 35.1    | 0.930211751 | 0.4565  | -1.078 |
| 97919_at   | 457    | 602.8  | 477.2  | 567.8  | 476.7  | 475.4  | 474.8  | 549.2  | 0.457384269 | 526.2    | 494.025  | 32.175  | 1.065128283 | 0.4702  | -1.06  |
| 97920_at   | 218.4  | 186.9  | 108.9  | 135.2  | 120.2  | 162.8  | 116.4  | 182.1  | 0.589538029 | 162.35   | 145.375  | 16.975  | 1.116766982 | 0.6471  | -1.097 |
| 97921_at   | 268.7  | 647.5  | 518.6  | 408    | 505.9  | 671.3  | 653.9  | 750.2  | 0.109762984 | 460.7    | 645.325  | 184.625 | 0.713903847 | 0.1164  | 1.459  |
| 97922_at   | 918.7  | 818.9  | 703.8  | 1121.1 | 614.4  | 821.4  | 740.8  | 866.7  | 0.26833446  | 890.625  | 760.825  | 129.8   | 1.170604278 | 0.2682  | -1.163 |
| 97923_at   | 1069.7 | 1084.3 | 1122.5 | 1237.9 | 904.7  | 1185.8 | 1257.9 | 1399.4 | 0.627678587 | 1128.6   | 1186.95  | 58.35   | 0.950840389 | 0.7018  | -1.04  |
| 97924_at   | 699    | 678.6  | 709    | 716.4  | 904.9  | 683.4  | 746.2  | 613.6  | 0.602231246 | 700.75   | 737.025  | 36.275  | 0.95078186  | 0.6445  | -1.041 |



|            |        |        |        |        |        |        |        |        |             |          |          |          |             |          |        |
|------------|--------|--------|--------|--------|--------|--------|--------|--------|-------------|----------|----------|----------|-------------|----------|--------|
| 97925_at   | 494.1  | 638.2  | 661.9  | 537.1  | 622.6  | 552.4  | 528.7  | 774.3  | 0.612482186 | 582.825  | 619.5    | 36.675   | 0.940799031 | 0.6236   | -1.059 |
| 97926_s_at | 3.4    | 4.5    | 2.8    | 4.5    | 3.6    | 11.1   | 42.7   | 19.7   | 0.165173078 | 3.8      | 19.275   | 15.475   | 0.197146563 | 0.05118  | 3.646  |
| 97927_at   | 552.3  | 580.2  | 578.9  | 670.7  | 630.1  | 472.5  | 671.3  | 603.8  | 0.98335788  | 595.525  | 594.425  | 1.1      | 1.001850528 | 0.9332   | -1.008 |
| 97928_at   | 161.8  | 407.4  | 236.6  | 349.7  | 154.7  | 378.9  | 299.8  | 348.3  | 0.932637199 | 288.875  | 295.425  | 6.55     | 0.977828552 | 0.9239   | -1.029 |
| 97929_r_at | 628.5  | 557.6  | 541.8  | 511.5  | 531.4  | 566.4  | 643.5  | 514.4  | 0.917935919 | 559.85   | 563.925  | 4.075    | 0.992773862 | 0.926    | -1.006 |
| 97930_f_at | 1804.3 | 1757   | 2022.2 | 1976.3 | 2061.8 | 2047.8 | 2088.9 | 2168.4 | 0.044550456 | 1889.95  | 2091.725 | 201.775  | 0.903536555 | 0.03034  | -1.108 |
| 97931_i_at | 3.8    | 3.8    | 4.8    | 4.5    | 6      | 3.7    | 5.8    | 5.9    | 0.13377334  | 4.225    | 5.35     | 1.125    | 0.789719626 | 0.1285   | 1.257  |
| 97932_f_at | 1782.6 | 1408.7 | 1666   | 1822.8 | 1676   | 1983.4 | 1578.8 | 1461.6 | 0.974139218 | 1670.025 | 1674.95  | 4.925    | 0.997059614 | 0.9871   | -1.001 |
| 97933_at   | 566.8  | 692.7  | 667.9  | 856.3  | 914.2  | 632.2  | 809.5  | 781.8  | 0.330481358 | 695.925  | 784.425  | 88.5     | 0.887178507 | 0.3273   | 1.13   |
| 97934_at   | 1542.9 | 1510.7 | 1546.6 | 1569.2 | 1553.2 | 1855   | 1826.3 | 1549.4 | 0.163334561 | 1542.35  | 1695.975 | 153.625  | 0.909417886 | 0.1179   | -1.096 |
| 97935_at   | 449.6  | 546.5  | 534.6  | 583.8  | 432.3  | 516.4  | 619    | 635.7  | 0.704822012 | 528.625  | 550.85   | 22.225   | 0.959653263 | 0.7589   | -1.035 |
| 97936_at   | 134.9  | 231.7  | 183.5  | 156.3  | 158.8  | 196.7  | 148.5  | 197.7  | 0.963572726 | 176.6    | 175.425  | 1.175    | 1.006698019 | 0.9682   | -1.006 |
| 97937_at   | 121.4  | 181    | 78.6   | 134.5  | 133.3  | 155.6  | 169.4  | 175.8  | 0.26599153  | 128.875  | 158.525  | 29.65    | 0.812963255 | 0.2309   | 1.277  |
| 97939_at   | 2035.5 | 1395.6 | 1726.9 | 1665.9 | 1312.2 | 1823.2 | 1751.6 | 1460.8 | 0.529312092 | 1705.975 | 1586.95  | 119.025  | 1.075002363 | 0.5334   | -1.075 |
| 97940_at   | 37.2   | 41.7   | 44.2   | 35.6   | 36.9   | 7      | 10.2   | 11.1   | 0.038365346 | 39.675   | 16.3     | 23.375   | 2.43404908  | 0.0227   | -3.021 |
| 97941_at   | 335.6  | 324.7  | 317.2  | 378.9  | 47     | 176.7  | 49     | 113.1  | 0.001721333 | 339.1    | 96.45    | 242.65   | 3.515811301 | 0.005015 | -4.107 |
| 97942_g_at | 2516.3 | 1781.8 | 2633.3 | 1972.4 | 763.1  | 1111.9 | 948.1  | 754.4  | 0.004003417 | 2225.95  | 894.375  | 1331.575 | 2.488832984 | 0.000466 | -2.489 |
| 97943_at   | 1875.5 | 1259.7 | 1699.6 | 1544.5 | 505.4  | 752.5  | 692.2  | 790.4  | 0.002514362 | 1594.825 | 685.125  | 909.7    | 2.3277869   | 0.000657 | -2.337 |
| 97944_f_at | 388.3  | 473.3  | 521.6  | 404.9  | 399.4  | 452.8  | 573.4  | 382.3  | 0.929070581 | 447.025  | 451.975  | 4.95     | 0.989048067 | 0.9641   | -1.005 |
| 97945_at   | 178.4  | 185.2  | 267.6  | 200.7  | 146.7  | 87.7   | 162.9  | 138.2  | 0.031167003 | 207.975  | 133.875  | 74.1     | 1.553501401 | 0.03314  | -1.573 |
| 97946_at   | 12.1   | 18.1   | 10.3   | 21.8   | 24     | 24.2   | 22.1   | 16.2   | 0.117846292 | 15.575   | 21.625   | 6.05     | 0.720231214 | 0.1157   | 1.437  |
| 97947_at   | 629.4  | 764.3  | 612.3  | 692.4  | 516.7  | 702.3  | 637.9  | 588.6  | 0.272330895 | 674.6    | 611.375  | 63.225   | 1.103414435 | 0.2656   | -1.106 |
| 97948_at   | 101    | 121.2  | 98.5   | 107.4  | 84.5   | 106.6  | 94.1   | 74.9   | 0.095205351 | 107.025  | 90.025   | 17       | 1.188836434 | 0.0907   | -1.195 |
| 97949_at   | 436.7  | 376.6  | 384.6  | 558    | 176    | 437    | 322.9  | 302.6  | 0.108235809 | 438.975  | 309.625  | 129.35   | 1.417763423 | 0.1148   | -1.472 |
| 97950_at   | 57.1   | 24     | 14.2   | 47     | 46     | 67.3   | 56.3   | 76.8   | 0.079131144 | 35.575   | 61.6     | 26.025   | 0.577516234 | 0.09396  | 1.959  |
| 97951_s_at | 537.7  | 1000.5 | 729.1  | 737    | 781.5  | 843.7  | 855.5  | 833.6  | 0.47741785  | 751.075  | 828.575  | 77.5     | 0.90646592  | 0.38     | 1.129  |
| 97952_at   | 11.7   | 20.4   | 15.3   | 13.3   | 10.4   | 16.3   | 16.9   | 15.4   | 0.865742183 | 15.175   | 14.75    | 0.425    | 1.028813559 | 0.8976   | -1.022 |
| 97953_g_at | 297.4  | 533.2  | 413.6  | 542.5  | 478.4  | 490.9  | 540.3  | 555.4  | 0.321861152 | 446.675  | 516.25   | 69.575   | 0.865230024 | 0.2843   | 1.186  |
| 97954_at   | 8.1    | 8.1    | 4      | 28.6   | 58.1   | 25.8   | 24.6   | 18.2   | 0.123969911 | 12.2     | 31.675   | 19.475   | 0.3851618   | 0.05785  | 3.082  |
| 97955_at   | 29.4   | 24.7   | 32.3   | 47.8   | 28.2   | 40.3   | 42.6   | 31.2   | 0.752219633 | 33.55    | 35.575   | 2.025    | 0.943078004 | 0.6815   | -1.077 |
| 97956_g_at | 20.7   | 13     | 17     | 28     | 16.9   | 21.5   | 28     | 24.2   | 0.482617496 | 19.675   | 22.65    | 2.975    | 0.868653422 | 0.4292   | 1.179  |
| 97957_at   | 122.1  | 151.8  | 176.3  | 171.3  | 178.4  | 136.2  | 169    | 145.8  | 0.904405103 | 155.375  | 157.35   | 1.975    | 0.987448364 | 0.8783   | -1.017 |
| 97958_at   | 102.7  | 100.4  | 67.4   | 150.7  | 115.9  | 94.9   | 109.6  | 96.9   | 0.959455627 | 105.3    | 104.325  | 0.975    | 1.009345794 | 0.8778   | -1.028 |
| 97960_at   | 749.8  | 950.2  | 813.7  | 761.4  | 375    | 967    | 540.6  | 617.3  | 0.222164141 | 818.775  | 624.975  | 193.8    | 1.310092404 | 0.162    | -1.382 |
| 97962_at   | 196.8  | 316.7  | 278.2  | 270.7  | 168.8  | 270.8  | 191.8  | 195.6  | 0.129668159 | 265.6    | 206.75   | 58.85    | 1.284643289 | 0.1278   | -1.286 |
| 97963_at   | 183.1  | 306.3  | 249.7  | 260.9  | 198.2  | 235.1  | 218.2  | 281.8  | 0.612881459 | 250      | 233.325  | 16.675   | 1.071466838 | 0.6584   | -1.063 |
| 97964_at   | 443.5  | 499.7  | 439.2  | 391.8  | 906    | 499.8  | 485    | 475.6  | 0.254270481 | 443.55   | 591.6    | 148.05   | 0.74974645  | 0.1742   | 1.286  |
| 97965_at   | 213.8  | 226.7  | 87.6   | 258.7  | 174.1  | 245.7  | 319.2  | 248    | 0.337902132 | 196.7    | 246.75   | 50.05    | 0.797163121 | 0.3482   | 1.325  |
| 97966_at   | 296.9  | 281.8  | 379    | 344.5  | 369.6  | 325.7  | 365.6  | 389.5  | 0.21403757  | 325.55   | 362.6    | 37.05    | 0.897821291 | 0.1975   | 1.119  |
| 97967_at   | 308.7  | 527.4  | 380.1  | 376.6  | 586.7  | 418.1  | 508.8  | 477.2  | 0.140268945 | 398.2    | 497.7    | 99.5     | 0.80008037  | 0.1246   | 1.264  |
| 97969_at   | 114.5  | 107.1  | 76.7   | 83.3   | 147.2  | 106.8  | 115    | 91.5   | 0.235800988 | 95.4     | 115.125  | 19.725   | 0.828664495 | 0.2254   | 1.205  |
| 97970_at   | 67.8   | 105.1  | 46.3   | 100.8  | 38.5   | 47.2   | 20.3   | 83.6   | 0.142333802 | 80       | 47.4     | 32.6     | 1.687763713 | 0.1398   | -1.813 |
| 97971_at   | 325    | 306.3  | 308.8  | 212.7  | 330    | 294.1  | 236    | 407    | 0.541961725 | 288.2    | 316.775  | 28.575   | 0.909794018 | 0.5762   | -1.093 |
| 97972_at   | 479.5  | 421.8  | 464.1  | 533    | 267.9  | 495.5  | 439    | 483.1  | 0.404829003 | 474.6    | 421.375  | 53.225   | 1.126312667 | 0.3802   | -1.155 |
| 97973_at   | 6.3    | 3.9    | 26.6   | 11     | 7.8    | 23.6   | 4.4    | 4.4    | 0.791208141 | 11.95    | 10.05    | 1.9      | 1.189054726 | 0.7609   | -1.2   |
| 97974_at   | 554.4  | 1436.8 | 973.6  | 915.2  | 634.6  | 790.3  | 858    | 573.6  | 0.258876303 | 970      | 714.125  | 255.875  | 1.358305619 | 0.2689   | -1.302 |
| 97975_at   | 430.9  | 423.2  | 448.5  | 666.8  | 373.5  | 507    | 325    | 648.3  | 0.767457578 | 492.35   | 463.45   | 28.9     | 1.062358399 | 0.6933   | -1.081 |
| 97976_at   | 206.8  | 168.5  | 170.7  | 203.3  | 179.9  | 204.3  | 192.6  | 205.3  | 0.521547368 | 187.325  | 195.525  | 8.2      | 0.958061629 | 0.492    | -1.047 |
| 97977_at   | 181.2  | 162.6  | 196.3  | 200.4  | 200    | 151.1  | 173.8  | 229.4  | 0.86340501  | 185.125  | 188.575  | 3.45     | 0.981704892 | 0.9279   | -1.01  |
| 97979_at   | 917.5  | 651.2  | 693.9  | 687.5  | 512.4  | 724.2  | 675.9  | 616.2  | 0.218402308 | 737.525  | 632.175  | 105.35   | 1.166646894 | 0.2048   | -1.165 |
| 97980_at   | 294.3  | 409.8  | 316.6  | 390.2  | 331.3  | 421.1  | 405.7  | 362.8  | 0.460135063 | 352.725  | 380.225  | 27.5     | 0.927674403 | 0.4399   | -1.083 |
| 97982_at   | 263.2  | 435.5  | 339.8  | 370.3  | 438.8  | 300.9  | 338.9  | 346    | 0.934767677 | 352.2    | 356.15   | 3.95     | 0.988909167 | 0.8973   | -1.018 |
| 97983_s_at | 282.1  | 412.2  | 337.6  | 354.1  | 349.1  | 443.4  | 408.5  | 404.8  | 0.152794367 | 346.5    | 401.45   | 54.95    | 0.863121186 | 0.1506   | 1.165  |
| 97984_i_at | 699.9  | 811.9  | 781    | 863.1  | 742    | 730.1  | 859.7  | 900.7  | 0.738082213 | 788.975  | 808.125  | 19.15    | 0.976303171 | 0.7516   | -1.023 |
| 97985_f_at | 1426.3 | 1361.6 | 1329.5 | 1421.1 | 1052.2 | 1332.7 | 1326.1 | 1519.3 | 0.4876426   | 1384.625 | 1307.575 | 77.05    | 1.058925874 | 0.4357   | -1.068 |
| 97986_at   | 344.1  | 398.7  | 530.8  | 393.5  | 491.7  | 356.4  | 481.8  | 450.1  | 0.597466256 | 416.775  | 445      | 28.225   | 0.936573034 | 0.5692   | -1.073 |



|            |        |        |        |        |        |        |        |        |             |          |          |          |             |          |        |
|------------|--------|--------|--------|--------|--------|--------|--------|--------|-------------|----------|----------|----------|-------------|----------|--------|
| 97987_at   | 20.1   | 22.4   | 27     | 15     | 22.4   | 21.5   | 23.8   | 30.9   | 0.325396    | 21.125   | 24.65    | 3.525    | 0.856997972 | 0.3053   | 1.18   |
| 97988_at   | 50     | 57.6   | 31.5   | 48.4   | 31.3   | 40.5   | 48.3   | 60     | 0.829112483 | 46.875   | 45.025   | 1.85     | 1.041088284 | 0.8174   | -1.047 |
| 97989_at   | 142.2  | 179.3  | 213.8  | 203.5  | 186.2  | 195.7  | 105.4  | 209.1  | 0.722307452 | 184.7    | 174.1    | 10.6     | 1.060884549 | 0.6733   | -1.084 |
| 97990_at   | 1682.7 | 1291.7 | 1647   | 1676.1 | 827.8  | 1217.8 | 1101.7 | 955.3  | 0.00513988  | 1574.375 | 1025.65  | 548.725  | 1.535002194 | 0.006423 | -1.542 |
| 97991_at   | 330.4  | 388.1  | 494.4  | 494.3  | 261.4  | 542.5  | 482    | 352.5  | 0.828167959 | 426.8    | 409.6    | 17.2     | 1.041992188 | 0.7431   | -1.068 |
| 97992_at   | 87.5   | 169.7  | 134.5  | 126.1  | 242.3  | 192.3  | 124.3  | 139.2  | 0.214424095 | 129.45   | 174.525  | 45.075   | 0.741727546 | 0.2059   | 1.337  |
| 97993_at   | 407.6  | 369.5  | 409.3  | 403.3  | 332.8  | 340.6  | 338.9  | 348.8  | 0.005640052 | 397.425  | 340.275  | 57.15    | 1.167952391 | 0.001033 | -1.167 |
| 97994_at   | 795    | 1422.1 | 930.8  | 977.2  | 770.3  | 910.4  | 909.5  | 962.9  | 0.377605782 | 1031.275 | 888.275  | 143      | 1.160986181 | 0.3676   | -1.138 |
| 97995_at   | 289.8  | 335.8  | 320.7  | 287.9  | 142.1  | 275    | 254.1  | 327.5  | 0.231070202 | 308.55   | 249.675  | 58.875   | 1.235806549 | 0.2188   | -1.289 |
| 97996_at   | 72.5   | 88.3   | 106.7  | 83.2   | 69.4   | 72.5   | 77.1   | 69.3   | 0.114254853 | 87.675   | 72.075   | 15.6     | 1.216441207 | 0.06739  | -1.206 |
| 97997_at   | 943.9  | 933.2  | 741    | 787.3  | 1029   | 1463.3 | 1041.5 | 1518.2 | 0.045379504 | 851.35   | 1263     | 411.65   | 0.674069675 | 0.01989  | 1.467  |
| 97998_at   | 151.8  | 202.8  | 155.3  | 186.5  | 115    | 190.7  | 161.5  | 191.2  | 0.679688768 | 174.1    | 164.6    | 9.5      | 1.057715674 | 0.6368   | -1.071 |
| 98000_at   | 34     | 81.5   | 96.5   | 99.3   | 56.3   | 90.1   | 66.2   | 68.5   | 0.673480928 | 77.825   | 70.275   | 7.55     | 1.107435076 | 0.8977   | -1.037 |
| 98001_at   | 113.1  | 242.9  | 224.1  | 182.4  | 122.5  | 220.3  | 170    | 194.2  | 0.710674083 | 190.625  | 176.75   | 13.875   | 1.078500707 | 0.795    | -1.06  |
| 98002_at   | 128.7  | 143.4  | 114.4  | 149    | 144.1  | 155    | 157.6  | 186.4  | 0.065723568 | 133.875  | 160.775  | 26.9     | 0.83268543  | 0.06258  | 1.202  |
| 98003_at   | 56.2   | 110.9  | 98.1   | 101.9  | 127.9  | 115.3  | 149.3  | 79.3   | 0.220247102 | 91.775   | 117.95   | 26.175   | 0.778083934 | 0.2562   | 1.293  |
| 98004_at   | 160.4  | 119.7  | 150.3  | 188.3  | 195.9  | 179.5  | 137.3  | 146.4  | 0.627471838 | 154.675  | 164.775  | 10.1     | 0.938704294 | 0.6214   | -1.068 |
| 98005_at   | 443.9  | 520.8  | 409.8  | 472.1  | 252.1  | 589.9  | 350    | 380.4  | 0.416258351 | 461.65   | 393.1    | 68.55    | 1.174383109 | 0.3065   | -1.226 |
| 98006_at   | 722.9  | 855.1  | 889.6  | 703.5  | 712.1  | 744.2  | 808.2  | 741.3  | 0.461083443 | 792.775  | 751.45   | 41.325   | 1.054993679 | 0.4739   | -1.051 |
| 98007_at   | 512.5  | 703.3  | 552.8  | 622    | 227.2  | 256    | 278.2  | 324.7  | 0.001572989 | 597.65   | 271.525  | 326.125  | 2.201086456 | 0.000245 | -2.204 |
| 98008_at   | 675.8  | 1072.7 | 565.6  | 640.6  | 714.2  | 862.9  | 822.8  | 739.6  | 0.719727216 | 738.675  | 784.875  | 46.2     | 0.941137124 | 0.5664   | -1.093 |
| 98010_at   | 120.9  | 110    | 106    | 140.5  | 259.6  | 154.8  | 239.5  | 164.3  | 0.043168917 | 119.35   | 204.55   | 85.2     | 0.583475923 | 0.0116   | 1.681  |
| 98011_at   | 141.6  | 258.4  | 336.9  | 405.2  | 198    | 337    | 241.1  | 422.9  | 0.857213693 | 285.525  | 299.75   | 14.225   | 0.952543786 | 0.7955   | -1.08  |
| 98013_at   | 671.1  | 488.2  | 471.1  | 663.1  | 333.6  | 592.4  | 537.8  | 562    | 0.434645084 | 573.375  | 506.45   | 66.925   | 1.132145325 | 0.4414   | -1.144 |
| 98014_at   | 5.5    | 5.4    | 6      | 5.2    | 5.8    | 8.2    | 6.5    | 5.5    | 0.205836945 | 5.525    | 6.5      | 0.975    | 0.85        | 0.1458   | 1.166  |
| 98015_at   | 958.1  | 766.8  | 1026.7 | 796.9  | 895.2  | 1018.2 | 958.4  | 840.3  | 0.602321157 | 887.125  | 928.025  | 40.9     | 0.955927911 | 0.5645   | -1.051 |
| 98016_at   | 643.4  | 375    | 528.7  | 490.5  | 446.6  | 505.3  | 477.5  | 489.5  | 0.633930615 | 509.4    | 479.725  | 29.675   | 1.061858356 | 0.7222   | -1.044 |
| 98017_at   | 155.4  | 224.8  | 169    | 227.7  | 209.5  | 241.6  | 185.1  | 190.2  | 0.607227659 | 194.225  | 206.6    | 12.375   | 0.940101646 | 0.5629   | -1.073 |
| 98018_at   | 129.2  | 148.4  | 191.7  | 205.8  | 141.2  | 130.7  | 95.9   | 149.5  | 0.123918699 | 168.775  | 129.325  | 39.45    | 1.305045428 | 0.1249   | -1.3   |
| 98019_at   | 1348.5 | 1524.9 | 1543.5 | 1332.5 | 1607.9 | 1162.7 | 1441.6 | 1752.8 | 0.716397409 | 1437.35  | 1491.25  | 53.9     | 0.963855826 | 0.785    | -1.028 |
| 98020_at   | 2444.4 | 1871.9 | 2237.8 | 2030.7 | 1676   | 1957.8 | 1747.3 | 1936.2 | 0.080254633 | 2146.2   | 1829.325 | 316.875  | 1.17321963  | 0.06462  | -1.17  |
| 98021_at   | 193.1  | 138.8  | 186.3  | 189.8  | 217.5  | 219.5  | 209.7  | 194.3  | 0.074448077 | 177      | 210.25   | 33.25    | 0.841854935 | 0.07404  | 1.197  |
| 98022_at   | 148.1  | 147.7  | 135.4  | 162.3  | 185.4  | 140.2  | 140.7  | 173    | 0.415475203 | 148.375  | 159.825  | 11.45    | 0.928359143 | 0.4275   | -1.071 |
| 98023_r_at | 2.1    | 17.9   | 3.5    | 2.5    | 16     | 2.8    | 3.4    | 4.7    | 0.965090703 | 6.5      | 6.725    | 0.225    | 0.966542751 | 0.7729   | 1.208  |
| 98024_at   | 943.2  | 657.4  | 778.4  | 889.3  | 636.8  | 728.2  | 609.5  | 802    | 0.167919617 | 817.075  | 694.125  | 122.95   | 1.17712948  | 0.1681   | -1.173 |
| 98025_at   | 46.3   | 38.6   | 34.8   | 56.5   | 7.4    | 31     | 25.2   | 36.7   | 0.057324921 | 44.05    | 25.075   | 18.975   | 1.756729811 | 0.1129   | -2.019 |
| 98026_g_at | 108.2  | 60.8   | 72.6   | 79.7   | 82.6   | 67.4   | 68.3   | 63.6   | 0.41746048  | 80.325   | 70.475   | 9.85     | 1.139765874 | 0.4259   | -1.12  |
| 98027_at   | 386.5  | 447.7  | 471.6  | 413.3  | 455.2  | 509.9  | 466.6  | 496.6  | 0.066274619 | 429.775  | 482.075  | 52.3     | 0.891510657 | 0.06287  | 1.124  |
| 98028_at   | 337.2  | 584.5  | 480.8  | 457.8  | 685.5  | 513.6  | 499.9  | 412.7  | 0.442483802 | 465.075  | 527.925  | 62.85    | 0.880948998 | 0.4371   | 1.137  |
| 98029_at   | 206.2  | 318.4  | 303    | 280    | 362.2  | 300.1  | 338.3  | 243.6  | 0.377888251 | 276.9    | 311.05   | 34.15    | 0.890210577 | 0.3985   | 1.126  |
| 98030_at   | 33.2   | 6.5    | 38.3   | 22.2   | 57.1   | 53.1   | 39.2   | 29.6   | 0.083274241 | 25.05    | 44.75    | 19.7     | 0.559776536 | 0.1373   | 2.093  |
| 98031_at   | 1644.3 | 2430.3 | 2460.1 | 1979.9 | 1806.7 | 1906.3 | 1945.3 | 1103.9 | 0.165983936 | 2128.65  | 1690.55  | 438.1    | 1.259146432 | 0.1934   | -1.274 |
| 98032_at   | 478.8  | 285.4  | 416.7  | 401.6  | 363.9  | 414.1  | 419.9  | 422.4  | 0.83640511  | 395.625  | 405.075  | 9.45     | 0.976670987 | 0.7469   | -1.04  |
| 98033_at   | 912.6  | 1028.1 | 898    | 771.1  | 1133   | 925.4  | 956.9  | 749.9  | 0.697102899 | 902.45   | 941.3    | 38.85    | 0.958727292 | 0.7344   | -1.037 |
| 98034_at   | 2.6    | 2.3    | 3.4    | 6      | 45.8   | 54.9   | 15.4   | 29.4   | 0.032595935 | 3.575    | 36.375   | 32.8     | 0.098281787 | 0.000657 | 9.786  |
| 98035_g_at | 99.3   | 82.1   | 104.2  | 122.3  | 253.9  | 231.1  | 242.7  | 196.6  | 0.000270362 | 101.975  | 231.075  | 129.1    | 0.441306935 | 0.000167 | 2.278  |
| 98036_at   | 375.7  | 520.9  | 423.1  | 423.1  | 555    | 645.5  | 412.4  | 530.9  | 0.13733399  | 435.7    | 535.95   | 100.25   | 0.812948969 | 0.1308   | 1.223  |
| 98037_at   | 1353.2 | 1157.9 | 1266   | 1400.7 | 1503.2 | 1255.4 | 1252.9 | 1236.7 | 0.839732774 | 1294.45  | 1312.05  | 17.6     | 0.986585877 | 0.846    | -1.013 |
| 98038_at   | 9258.6 | 9193.9 | 9531   | 9135.9 | 6701.8 | 8311.8 | 7698.7 | 7606.2 | 0.011547764 | 9279.85  | 7579.625 | 1700.225 | 1.224315187 | 0.004098 | -1.228 |
| 98039_at   | 1036.6 | 1006.1 | 989.9  | 931    | 1707.5 | 877.4  | 1194.1 | 1053   | 0.311945958 | 990.9    | 1208     | 217.1    | 0.820281457 | 0.2822   | 1.183  |
| 98040_at   | 199    | 197.7  | 290.8  | 253.9  | 306.3  | 213.3  | 195.5  | 275.2  | 0.735178211 | 235.35   | 247.575  | 12.225   | 0.950621024 | 0.7479   | -1.049 |
| 98041_at   | 1.1    | 1.7    | 0.8    | 1.8    | 1.8    | 6.7    | 2.8    | 3.1    | 0.124191729 | 1.35     | 3.6      | 2.25     | 0.375       | 0.0321   | 2.522  |
| 98042_at   | 730.2  | 791.4  | 761.6  | 776.6  | 984.3  | 988.9  | 955.5  | 594    | 0.314703533 | 764.95   | 880.675  | 115.725  | 0.868595112 | 0.3759   | -1.128 |
| 98044_at   | 250.5  | 170.6  | 246.6  | 202    | 139.6  | 232.7  | 253.3  | 243.5  | 0.996474856 | 217.425  | 217.275  | 0.15     | 1.000690369 | 0.9301   | -1.015 |
| 98045_s_at | 876.5  | 734.6  | 436.8  | 870.4  | 428.8  | 725.4  | 758.3  | 921.7  | 0.889743362 | 729.575  | 708.55   | 21.025   | 1.029673276 | 0.9021   | -1.03  |
| 98047_at   | 1261.3 | 1057.9 | 1048.5 | 1084.6 | 990.1  | 1132.8 | 1020.1 | 890.6  | 0.188709991 | 1113.075 | 1008.4   | 104.675  | 1.103803054 | 0.1803   | -1.105 |



|            |         |         |         |         |         |         |         |         |             |          |          |         |             |          |        |
|------------|---------|---------|---------|---------|---------|---------|---------|---------|-------------|----------|----------|---------|-------------|----------|--------|
| 98048_at   | 971.5   | 699.7   | 800.3   | 862.2   | 456.9   | 756.5   | 624.5   | 848.6   | 0.172142213 | 833.425  | 671.625  | 161.8   | 1.240908245 | 0.1725   | -1.265 |
| 98049_at   | 603.1   | 627.9   | 617.8   | 532.7   | 505.4   | 600     | 593.7   | 516.7   | 0.255784399 | 595.375  | 553.95   | 41.425  | 1.074781117 | 0.2578   | -1.076 |
| 98051_at   | 485.5   | 429.1   | 425.6   | 428.7   | 509     | 494.5   | 521.8   | 475.8   | 0.019308452 | 442.225  | 500.275  | 58.05   | 0.88396382  | 0.01585  | 1.132  |
| 98052_at   | 366.1   | 352.1   | 367.1   | 379.2   | 450.1   | 501.6   | 395.1   | 367.8   | 0.124674643 | 366.125  | 428.65   | 62.525  | 0.854135075 | 0.07633  | 1.163  |
| 98053_at   | 644.9   | 641.7   | 574.4   | 701.7   | 760.9   | 633.2   | 640.6   | 636.8   | 0.527743401 | 640.675  | 667.875  | 27.2    | 0.959273816 | 0.5245   | -1.042 |
| 98054_at   | 15.6    | 38.8    | 27.5    | 21.2    | 18.1    | 28.5    | 6.5     | 5.7     | 0.182634918 | 25.775   | 14.7     | 11.075  | 1.753401361 | 0.1477   | -2.073 |
| 98055_at   | 389.6   | 269.5   | 327.4   | 345.8   | 310.3   | 434.2   | 411.8   | 389.6   | 0.196205986 | 333.075  | 386.475  | 53.4    | 0.861828061 | 0.2105   | 1.161  |
| 98056_at   | 458.8   | 636.7   | 600.3   | 638.6   | 855.3   | 791.6   | 655     | 803.2   | 0.018692788 | 583.6    | 776.275  | 192.675 | 0.751795433 | 0.02498  | 1.335  |
| 98057_at   | 360.5   | 496.7   | 400.8   | 408     | 454.3   | 417.8   | 376.1   | 499.8   | 0.617703312 | 416.5    | 437      | 20.5    | 0.953089245 | 0.6036   | -1.051 |
| 98059_s_at | 2058.1  | 3150.1  | 2731.8  | 2603    | 3328.5  | 3084.1  | 2937.4  | 3027.6  | 0.13235688  | 2635.75  | 3094.4   | 458.65  | 0.851780636 | 0.114    | 1.186  |
| 98060_at   | 245.4   | 359.9   | 347.2   | 366.9   | 390.2   | 325.6   | 352.7   | 349.7   | 0.473197503 | 329.85   | 354.55   | 24.7    | 0.930334226 | 0.4483   | -1.086 |
| 98061_at   | 1017.1  | 912.4   | 941.8   | 985.7   | 812.2   | 878     | 890.8   | 884.1   | 0.017271013 | 964.25   | 866.275  | 97.975  | 1.113099189 | 0.01604  | -1.113 |
| 98063_at   | 19      | 53.8    | 47.2    | 23.3    | 33.1    | 19.8    | 20.4    | 36.5    | 0.429617835 | 35.825   | 27.45    | 8.375   | 1.305100182 | 0.516    | -1.232 |
| 98064_at   | 2281.9  | 2489.1  | 2436.3  | 2296.9  | 2373    | 2504.4  | 2311.9  | 2296    | 0.948238864 | 2376.05  | 2371.325 | 4.725   | 1.001992557 | 0.9499   | -1.002 |
| 98065_at   | 1501.6  | 1779.8  | 1711.1  | 2103.6  | 1752.7  | 2129.8  | 2287.6  | 1745    | 0.311154101 | 1774.025 | 1978.775 | 204.75  | 0.896526892 | 0.306    | 1.116  |
| 98066_r_at | 267.8   | 329.6   | 307.1   | 368.1   | 360.8   | 303     | 383     | 418.2   | 0.184530781 | 318.15   | 366.25   | 48.1    | 0.868668942 | 0.1907   | 1.151  |
| 98067_at   | 129.5   | 67.2    | 49      | 144.3   | 203.3   | 123.4   | 130.4   | 127.9   | 0.157963036 | 97.5     | 146.25   | 48.75   | 0.666666667 | 0.144    | 1.615  |
| 98069_s_at | 855.7   | 973.1   | 948.6   | 906.7   | 828.4   | 894.1   | 851.7   | 962     | 0.380449083 | 921.025  | 884.05   | 36.975  | 1.041824557 | 0.3748   | -1.042 |
| 98070_at   | 677.7   | 782.6   | 699.9   | 723.5   | 826.1   | 721.3   | 821.3   | 806.4   | 0.071836809 | 720.925  | 793.775  | 72.85   | 0.908223363 | 0.07337  | -1.101 |
| 98071_f_at | 1101    | 985.6   | 1061.8  | 1207.2  | 878.2   | 1097.6  | 949.5   | 969     | 0.126158682 | 1088.9   | 973.575  | 115.325 | 1.118455178 | 0.1221   | -1.119 |
| 98072_r_at | 58.8    | 58.4    | 51.9    | 72      | 56.1    | 42.6    | 59.7    | 32.3    | 0.155110692 | 60.275   | 47.675   | 12.6    | 1.26428946  | 0.1526   | -1.292 |
| 98073_at   | 792.1   | 895.7   | 701.7   | 689.8   | 765.6   | 802.1   | 811.9   | 779     | 0.710243829 | 769.825  | 789.65   | 19.825  | 0.97489394  | 0.6385   | -1.031 |
| 98075_at   | 1507.7  | 1315    | 1492.6  | 1355.8  | 1389.6  | 1301.8  | 1466.2  | 1113.1  | 0.316316251 | 1417.775 | 1317.675 | 100.1   | 1.075967139 | 0.3074   | -1.08  |
| 98076_at   | 2218.3  | 2010.1  | 1755.2  | 1941    | 1901.1  | 1891.9  | 1954    | 1965.7  | 0.621918852 | 1981.15  | 1928.175 | 52.975  | 1.027474166 | 0.6466   | -1.024 |
| 98077_at   | 1408.5  | 1021.1  | 1101.2  | 1388.5  | 1272.4  | 1190.6  | 847.8   | 1248.3  | 0.543215279 | 1229.825 | 1139.775 | 90.05   | 1.079006822 | 0.5518   | -1.082 |
| 98078_at   | 170.6   | 229.6   | 199.9   | 242.9   | 213.4   | 249.6   | 219.8   | 235.1   | 0.352740491 | 210.75   | 229.475  | 18.725  | 0.918400697 | 0.3263   | -1.097 |
| 98079_at   | 76.6    | 72.3    | 124.7   | 102.5   | 146.6   | 82.2    | 136.7   | 138.3   | 0.148120245 | 94.025   | 125.95   | 31.925  | 0.746526399 | 0.1668   | 1.339  |
| 98081_at   | 671.5   | 639.9   | 735.5   | 620.3   | 674.6   | 592.2   | 625.1   | 575.7   | 0.186021774 | 666.8    | 616.9    | 49.9    | 1.080888313 | 0.1785   | -1.081 |
| 98082_at   | 2.7     | 9.2     | 10.9    | 4.3     | 9.6     | 7.8     | 6       | 8       | 0.634314378 | 6.775    | 7.85     | 1.075   | 0.863057325 | 0.4325   | 1.33   |
| 98083_at   | 1307.6  | 908.6   | 825.1   | 1212.3  | 715.9   | 952.1   | 957.8   | 1039.6  | 0.328808983 | 1063.4   | 916.35   | 147.05  | 1.160473618 | 0.3485   | -1.15  |
| 98084_at   | 3190.4  | 3813.8  | 4357.1  | 3385.7  | 3203.3  | 4136.3  | 3654.6  | 4187.1  | 0.764895648 | 3686.75  | 3795.325 | 108.575 | 0.971392437 | 0.755    | -1.031 |
| 98085_f_at | 20134.5 | 20685.6 | 21209.3 | 16351.6 | 36897.9 | 17901.6 | 24031.2 | 19292.3 | 0.341198427 | 19595.25 | 24530.75 | 4935.5  | 0.798803542 | 0.3194   | 1.207  |
| 98086_r_at | 120.7   | 98.3    | 143.3   | 110.4   | 143.5   | 118     | 115.1   | 79.3    | 0.805983039 | 118.175  | 113.975  | 4.2     | 1.036850186 | 0.7533   | -1.05  |
| 98087_at   | 583.8   | 505.8   | 559.7   | 704.5   | 373.5   | 694.8   | 644     | 521.1   | 0.732132817 | 588.45   | 558.35   | 30.1    | 1.053908839 | 0.6567   | -1.075 |
| 98088_at   | 317.1   | 333     | 336.2   | 379.2   | 334.7   | 434     | 434.5   | 423.5   | 0.067531139 | 341.375  | 406.675  | 65.3    | 0.83942952  | 0.05918  | 1.187  |
| 98089_at   | 249.8   | 168.9   | 213.3   | 215.8   | 224.9   | 226.5   | 187.7   | 224.4   | 0.845454599 | 211.95   | 215.875  | 3.925   | 0.981818182 | 0.7978   | -1.025 |
| 98090_at   | 250.8   | 234.6   | 152.5   | 230.4   | 135.6   | 199.5   | 184.8   | 225.9   | 0.332764638 | 217.075  | 186.45   | 30.625  | 1.164253151 | 0.3726   | -1.163 |
| 98092_at   | 2179    | 1658.5  | 1744.9  | 1786    | 2439.9  | 2601.7  | 2439.9  | 2546.4  | 0.006807978 | 1842.1   | 2506.975 | 664.875 | 0.734789936 | 0.002321 | 1.368  |
| 98094_f_at | 482.4   | 745.2   | 575.4   | 771.9   | 833.5   | 663.3   | 750.7   | 739.4   | 0.247902245 | 643.725  | 746.725  | 103     | 0.862064348 | 0.2252   | 1.177  |
| 98096_f_at | 254.3   | 266.7   | 304.3   | 251.3   | 433     | 345.2   | 356.6   | 283     | 0.062786051 | 269.15   | 354.45   | 85.3    | 0.759345465 | 0.03381  | 1.306  |
| 98097_r_at | 107.8   | 161.2   | 150.4   | 174.4   | 144.6   | 161.9   | 166.7   | 140.9   | 0.762905559 | 148.45   | 153.525  | 5.075   | 0.966943495 | 0.6938   | -1.048 |
| 98098_at   | 22.5    | 18.6    | 24.1    | 6.9     | 27.7    | 14      | 19.8    | 8.5     | 0.929050713 | 18.025   | 17.5     | 0.525   | 1.03        | 0.9669   | -1.017 |
| 98099_at   | 930.5   | 930.4   | 918.6   | 939.3   | 1027.3  | 787.1   | 888.4   | 1087.1  | 0.810259368 | 929.7    | 947.475  | 17.775  | 0.981239611 | 0.8842   | -1.011 |
| 98101_at   | 1657.5  | 1412.7  | 1320.3  | 1392    | 1585.4  | 1259.3  | 1224    | 1221.6  | 0.325427928 | 1445.625 | 1322.575 | 123.05  | 1.093038202 | 0.2948   | -1.096 |
| 98102_at   | 1857.9  | 1755.4  | 2191.6  | 1991.9  | 1257.7  | 2318.2  | 2229.1  | 1695.3  | 0.793945942 | 1949.2   | 1875.075 | 74.125  | 1.039531752 | 0.6834   | -1.066 |
| 98104_at   | 1823.4  | 1764.2  | 1729.8  | 1837.5  | 1389.8  | 1648.8  | 1554.2  | 1537.9  | 0.01071733  | 1788.725 | 1532.675 | 256.05  | 1.167060858 | 0.00647  | -1.169 |
| 98106_at   | 616.6   | 725.9   | 684.5   | 703.2   | 840.6   | 595.3   | 919.2   | 586.3   | 0.586419367 | 682.55   | 735.35   | 52.8    | 0.928197457 | 0.66     | -1.058 |
| 98107_at   | 1015    | 1285.4  | 1215.3  | 1356.6  | 821.1   | 1228.1  | 1191.2  | 981     | 0.227853478 | 1218.075 | 1055.35  | 162.725 | 1.154190553 | 0.2311   | -1.162 |
| 98108_at   | 180.5   | 219.3   | 209.5   | 171     | 251.7   | 265.4   | 301.3   | 211     | 0.03624474  | 195.075  | 257.35   | 62.275  | 0.758014377 | 0.02734  | 1.316  |
| 98109_at   | 152.9   | 177.5   | 168.4   | 140.8   | 196.3   | 151.7   | 158.2   | 190     | 0.349316106 | 159.9    | 174.05   | 14.15   | 0.918701523 | 0.3564   | -1.086 |
| 98110_at   | 462.4   | 518.3   | 513.8   | 519.6   | 484.4   | 654.7   | 579.6   | 628     | 0.109391732 | 503.525  | 586.675  | 83.15   | 0.858269059 | 0.08785  | 1.159  |
| 98111_at   | 1210.6  | 865     | 861.4   | 981.9   | 903.4   | 855.5   | 975.5   | 850.3   | 0.394148335 | 979.725  | 896.175  | 83.55   | 1.093229559 | 0.3831   | -1.084 |
| 98112_r_at | 53.8    | 43.5    | 57.2    | 79.4    | 48.6    | 71.2    | 66      | 43.5    | 0.912992911 | 58.475   | 57.325   | 1.15    | 1.020061055 | 0.9228   | -1.018 |
| 98113_at   | 4217.8  | 3364.5  | 3543    | 3578.5  | 3913.3  | 3492.6  | 3687.7  | 3289.1  | 0.739594855 | 3675.95  | 3595.675 | 80.275  | 1.022325433 | 0.7502   | -1.021 |
| 98114_at   | 470     | 556.8   | 469.4   | 487.4   | 553.7   | 594.4   | 528.8   | 585     | 0.038113661 | 495.9    | 565.475  | 69.575  | 0.876961846 | 0.03382  | 1.142  |
| 98116_at   | 2.7     | 11.4    | 3.6     | 6.3     | 22.8    | 2.4     | 2       | 2.6     | 0.804820382 | 6        | 7.45     | 1.45    | 0.805369128 | 0.7433   | -1.253 |



|            |         |         |         |         |         |         |         |         |             |           |           |          |             |          |        |
|------------|---------|---------|---------|---------|---------|---------|---------|---------|-------------|-----------|-----------|----------|-------------|----------|--------|
| 98117_at   | 102.7   | 81.2    | 105     | 160.3   | 115.3   | 128.3   | 111.1   | 115.2   | 0.782527345 | 112.3     | 117.475   | 5.175    | 0.955948074 | 0.6239   | -1.078 |
| 98118_at   | 6       | 9.5     | 7.4     | 10      | 7.2     | 15.6    | 7.9     | 13.2    | 0.284791496 | 8.225     | 10.975    | 2.75     | 0.749430524 | 0.2954   | 1.293  |
| 98119_at   | 18193.6 | 18210.9 | 17886.4 | 17164.3 | 27280.6 | 16362.5 | 20364.4 | 17898.2 | 0.358886807 | 17863.8   | 20476.425 | 2612.625 | 0.872408147 | 0.3363   | 1.125  |
| 98120_at   | 1379.7  | 1751.6  | 1680.8  | 1170.8  | 2675.8  | 1525.9  | 1768.6  | 1322.7  | 0.371691346 | 1495.725  | 1823.25   | 327.525  | 0.820361991 | 0.3662   | 1.19   |
| 98121_at   | 1237    | 1392.9  | 1523    | 1346.3  | 1420.1  | 1395.6  | 1453.3  | 1548.7  | 0.297517615 | 1374.8    | 1454.425  | 79.625   | 0.945253279 | 0.2763   | -1.06  |
| 98122_at   | 1036.4  | 1307.6  | 994.1   | 1362    | 930.3   | 961.3   | 868.5   | 1008.9  | 0.083445477 | 1175.025  | 942.25    | 232.775  | 1.247041656 | 0.04797  | -1.237 |
| 98123_at   | 29.4    | 20.8    | 13.6    | 16.2    | 3.8     | 4.2     | 7.5     | 10.8    | 0.022367111 | 20        | 6.575     | 13.425   | 3.041825095 | 0.008161 | -3.204 |
| 98124_at   | 690.2   | 707.1   | 740.3   | 655.8   | 1149.6  | 818.9   | 897.9   | 815.8   | 0.063271039 | 698.35    | 920.55    | 222.2    | 0.758622563 | 0.01945  | 1.306  |
| 98125_at   | 848.8   | 747.3   | 864.9   | 811.9   | 1015    | 671.3   | 803     | 1168.1  | 0.452953158 | 818.225   | 914.35    | 96.125   | 0.894870673 | 0.5046   | -1.094 |
| 98126_s_at | 74.6    | 54.7    | 80.1    | 95.4    | 19.3    | 46.8    | 97      | 83.9    | 0.499166845 | 76.2      | 61.75     | 14.45    | 1.234008097 | 0.3836   | -1.435 |
| 98127_at   | 1682.3  | 1516.2  | 1481.9  | 1547.1  | 1357.7  | 1634.1  | 1512.3  | 1474.8  | 0.422550874 | 1556.875  | 1494.725  | 62.15    | 1.041579555 | 0.4096   | -1.043 |
| 98128_at   | 3786.8  | 3430.3  | 3506.6  | 2961.7  | 3762.8  | 3150.9  | 3149.2  | 2767.5  | 0.456190208 | 3421.35   | 3207.6    | 213.75   | 1.066638608 | 0.4437   | -1.069 |
| 98129_at   | 10712.9 | 11998.1 | 10565.3 | 7572.4  | 21805.8 | 9644.4  | 12194.7 | 8998.3  | 0.402051541 | 10212.175 | 13160.8   | 2948.625 | 0.775953969 | 0.402    | 1.224  |
| 98130_at   | 1445.7  | 1204    | 1273    | 1180.8  | 1390.1  | 1289.3  | 1398    | 1347.4  | 0.283231255 | 1275.875  | 1356.2    | 80.325   | 0.94077201  | 0.2428   | -1.066 |
| 98131_at   | 565.7   | 400.9   | 510.3   | 443.8   | 282.2   | 397.7   | 392.8   | 339.5   | 0.033614404 | 480.175   | 353.05    | 127.125  | 1.360076476 | 0.03138  | -1.361 |
| 98132_at   | 880.8   | 614.9   | 749     | 897.8   | 428.6   | 401.2   | 388.3   | 383.2   | 0.009063175 | 785.625   | 400.325   | 385.3    | 1.962467995 | 0.000346 | -1.942 |
| 98133_at   | 4.6     | 6.1     | 7       | 8.4     | 10.5    | 6.1     | 8.7     | 19.1    | 0.203428218 | 6.525     | 11.1      | 4.575    | 0.587837838 | 0.1359   | 1.592  |
| 98134_at   | 659.4   | 442.5   | 621.8   | 492.2   | 442.2   | 546.6   | 477.9   | 367.9   | 0.189516867 | 553.975   | 458.65    | 95.325   | 1.207838221 | 0.19     | -1.204 |
| 98135_r_at | 21.2    | 22.2    | 28.4    | 21.3    | 37.7    | 22.1    | 47.4    | 29      | 0.141907002 | 23.275    | 34.05     | 10.775   | 0.683553598 | 0.09782  | 1.418  |
| 98136_at   | 828.3   | 757.7   | 756.3   | 792.1   | 580.9   | 666.3   | 574.4   | 661.8   | 0.002510446 | 783.6     | 620.85    | 162.75   | 1.262140614 | 0.002164 | -1.264 |
| 98137_at   | 82.8    | 99.8    | 47.2    | 107.4   | 101.6   | 62.2    | 105.3   | 80.5    | 0.859542222 | 84.3      | 87.4      | 3.1      | 0.964530892 | 0.7918   | -1.063 |
| 98138_at   | 285.4   | 315.4   | 355.8   | 337.2   | 366.2   | 320.9   | 409.2   | 263.7   | 0.65600816  | 323.45    | 340       | 16.55    | 0.951323529 | 0.7176   | -1.041 |
| 98139_at   | 13.2    | 79.8    | 22.8    | 19.3    | 85.5    | 40.2    | 19      | 15.1    | 0.791760616 | 33.775    | 39.95     | 6.175    | 0.84543179  | 0.7466   | 1.206  |
| 98140_at   | 363.8   | 346.9   | 353.1   | 367.9   | 364.8   | 353     | 379.1   | 434.3   | 0.263149903 | 357.925   | 382.8     | 24.875   | 0.935018286 | 0.2253   | -1.066 |
| 98141_at   | 356.3   | 227.2   | 257.3   | 216.4   | 282.8   | 241.4   | 229.5   | 241.7   | 0.673741609 | 264.3     | 248.85    | 15.45    | 1.062085594 | 0.731    | -1.045 |
| 98142_at   | 745.7   | 560.7   | 668.8   | 581.5   | 546.3   | 586.9   | 668.5   | 629.6   | 0.558651591 | 639.175   | 607.825   | 31.35    | 1.051577345 | 0.5756   | -1.048 |
| 98143_at   | 591.3   | 585.8   | 520.6   | 518     | 455.5   | 536.7   | 584.3   | 520.2   | 0.408757712 | 553.925   | 524.175   | 29.75    | 1.056755854 | 0.3996   | -1.059 |
| 98144_f_at | 687.8   | 592.1   | 669.3   | 484.5   | 917.3   | 665.9   | 725.3   | 537.2   | 0.313401629 | 608.425   | 711.425   | 103      | 0.855220157 | 0.3218   | 1.159  |
| 98146_at   | 1496.4  | 1521.9  | 1294.2  | 1610.4  | 1221.4  | 1253.8  | 1457.3  | 1612.9  | 0.440538964 | 1480.725  | 1386.35   | 94.375   | 1.06807444  | 0.4221   | -1.072 |
| 98147_at   | 757.9   | 868.4   | 747.1   | 702.5   | 813.4   | 846.9   | 884.8   | 776.9   | 0.20204362  | 768.975   | 830.5     | 61.525   | 0.925918122 | 0.1847   | -1.082 |
| 98148_at   | 72.6    | 70.2    | 91.6    | 78.8    | 59.6    | 74.2    | 101.8   | 87      | 0.827675344 | 78.3      | 80.65     | 2.35     | 0.970861748 | 0.9063   | -1.016 |
| 98149_s_at | 2449.8  | 3025.1  | 2424.4  | 2282.5  | 3359.8  | 2501.5  | 2494    | 2189.1  | 0.774824281 | 2545.45   | 2636.1    | 90.65    | 0.965612078 | 0.8064   | -1.028 |
| 98150_at   | 1667.5  | 1688.3  | 1459.4  | 2086.2  | 1097.3  | 1648.5  | 1354.7  | 2218.5  | 0.619802487 | 1725.35   | 1579.75   | 145.6    | 1.092166482 | 0.5208   | -1.121 |
| 98151_s_at | 671.9   | 694.7   | 685.5   | 905.2   | 443.3   | 844     | 642.2   | 796     | 0.608055571 | 739.325   | 681.375   | 57.95    | 1.085048615 | 0.5452   | -1.109 |
| 98152_at   | 1957.1  | 2065.5  | 2308.6  | 2127.4  | 1329    | 1667.1  | 2347.5  | 2060.7  | 0.330137944 | 2114.65   | 1851.075  | 263.575  | 1.142390233 | 0.2786   | -1.167 |
| 98153_at   | 2510.6  | 2141.7  | 2504.2  | 2097    | 2226.9  | 2208    | 2554.7  | 1942.6  | 0.650336876 | 2313.375  | 2233.05   | 80.325   | 1.035970981 | 0.6402   | -1.037 |
| 98154_at   | 418.1   | 652.6   | 496.2   | 581.8   | 472.5   | 670.7   | 519.2   | 519     | 0.90671804  | 537.175   | 545.35    | 8.175    | 0.985009627 | 0.875    | -1.02  |
| 98155_r_at | 1276.3  | 1597.1  | 1522.6  | 1274.6  | 1791.9  | 1252.1  | 1462.5  | 1335.8  | 0.77835149  | 1417.65   | 1460.575  | 42.925   | 0.97061089  | 0.8019   | -1.026 |
| 98168_at   | 11324.8 | 12613.5 | 10848.5 | 9694.3  | 17989.6 | 10051.7 | 11956.6 | 11085.6 | 0.434014399 | 11120.275 | 12770.875 | 1650.6   | 0.870752787 | 0.4331   | 1.124  |
| 98169_s_at | 660.3   | 674.6   | 683.2   | 784.7   | 576.1   | 563.5   | 608.7   | 596.9   | 0.021553024 | 700.7     | 586.3     | 114.4    | 1.195121951 | 0.00624  | -1.193 |
| 98240_at   | 41      | 28.4    | 19.3    | 17.5    | 77.5    | 38.3    | 68.9    | 17.8    | 0.18139365  | 26.55     | 50.625    | 24.075   | 0.524444444 | 0.2022   | 1.743  |
| 98245_at   | 212.5   | 261     | 258.5   | 266.2   | 297.1   | 258.1   | 265.7   | 251.6   | 0.292160963 | 249.55    | 268.125   | 18.575   | 0.930722611 | 0.2934   | -1.077 |
| 98247_at   | 16.9    | 64.2    | 17      | 16.4    | 82.9    | 22.6    | 13.2    | 42.3    | 0.573902761 | 28.625    | 40.25     | 11.625   | 0.711180124 | 0.5726   | 1.364  |
| 98254_f_at | 9624.9  | 8578.8  | 9145.2  | 7188.7  | 9011.4  | 8836.3  | 10348.7 | 9427.3  | 0.271560132 | 8634.4    | 9405.925  | 771.525  | 0.917974575 | 0.2639   | -1.094 |
| 98276_at   | 17      | 23.6    | 28      | 54.9    | 25      | 29.7    | 21.2    | 25.1    | 0.551944652 | 30.875    | 25.25     | 5.625    | 1.222772277 | 0.6783   | -1.118 |
| 98277_at   | 134.1   | 138.3   | 145.2   | 146.5   | 182.5   | 120.4   | 153.3   | 201.1   | 0.279236216 | 141.025   | 164.325   | 23.3     | 0.85820782  | 0.2815   | 1.145  |
| 98278_at   | 236.7   | 224.5   | 301.9   | 206.6   | 237.3   | 238     | 262     | 185.1   | 0.670224076 | 242.425   | 230.6     | 11.825   | 1.051279271 | 0.681    | -1.049 |
| 98279_at   | 6.5     | 14.4    | 14.8    | 9.7     | 7.4     | 25.9    | 10.4    | 12.5    | 0.581982063 | 11.35     | 14.05     | 2.7      | 0.807829181 | 0.644    | 1.173  |
| 98280_at   | 133.4   | 77.4    | 99.6    | 131.2   | 53.5    | 170.6   | 119.7   | 144.8   | 0.698683456 | 110.4     | 122.15    | 11.75    | 0.903806795 | 0.8955   | -1.04  |
| 98281_at   | 1.7     | 3.1     | 5.6     | 2.5     | 3       | 3.6     | 18.5    | 2.8     | 0.405451505 | 3.225     | 6.975     | 3.75     | 0.462365591 | 0.3577   | 1.672  |
| 98282_at   | 12.2    | 6.8     | 11.8    | 8.9     | 4.3     | 7.5     | 5.7     | 5.1     | 0.0351838   | 9.925     | 5.65      | 4.275    | 1.756637168 | 0.0207   | -1.746 |
| 98283_at   | 212.3   | 179.5   | 212.4   | 252.4   | 140.2   | 200.9   | 91.3    | 235     | 0.246590027 | 214.15    | 166.85    | 47.3     | 1.283488163 | 0.2183   | -1.356 |
| 98284_f_at | 369     | 409     | 660.1   | 367.1   | 219     | 462.8   | 423.9   | 367.3   | 0.385702427 | 451.3     | 368.25    | 83.05    | 1.225526137 | 0.3722   | -1.234 |
| 98285_at   | 246.7   | 143.3   | 161.5   | 165.2   | 108     | 217.9   | 90.5    | 86.1    | 0.219777948 | 179.175   | 125.625   | 53.55    | 1.426268657 | 0.1459   | -1.506 |
| 98286_at   | 44.2    | 17      | 64.2    | 22.9    | 14.6    | 28      | 18.4    | 14.4    | 0.189371975 | 37.075    | 18.85     | 18.225   | 1.966843501 | 0.1381   | -1.79  |
| 98287_at   | 57.2    | 78.8    | 54.3    | 65.3    | 78.4    | 72.7    | 82.7    | 95.4    | 0.045972043 | 63.9      | 82.3      | 18.4     | 0.776427704 | 0.04289  | 1.295  |



|            |         |         |         |         |         |         |         |         |             |           |          |          |             |          |        |
|------------|---------|---------|---------|---------|---------|---------|---------|---------|-------------|-----------|----------|----------|-------------|----------|--------|
| 98288_at   | 7       | 9.9     | 14.7    | 7.5     | 17.5    | 9.6     | 9.3     | 15.9    | 0.277497332 | 9.775     | 13.075   | 3.3      | 0.747609943 | 0.2584   | 1.344  |
| 98289_at   | 195.5   | 153.1   | 195.2   | 178.9   | 210.4   | 157.4   | 160.6   | 183.9   | 0.87512919  | 180.675   | 178.075  | 2.6      | 1.01460059  | 0.8575   | -1.017 |
| 98290_at   | 142     | 142.7   | 193.1   | 135.6   | 173.1   | 163.7   | 181.1   | 211.2   | 0.139973616 | 153.35    | 182.275  | 28.925   | 0.841311206 | 0.1179   | 1.195  |
| 98291_at   | 278.2   | 261.6   | 294.6   | 265.9   | 268.7   | 269.3   | 213.1   | 296.8   | 0.529283512 | 275.075   | 261.975  | 13.1     | 1.050004771 | 0.4931   | -1.056 |
| 98292_at   | 12.2    | 43.7    | 16.5    | 40.7    | 19.5    | 51.4    | 14.6    | 60.2    | 0.583027229 | 28.275    | 36.425   | 8.15     | 0.776252574 | 0.6556   | 1.25   |
| 98293_g_at | 19.4    | 4.2     | 8       | 30.2    | 11.3    | 22.5    | 8.7     | 8.7     | 0.711364733 | 15.45     | 12.8     | 2.65     | 1.20703125  | 0.9937   | -1.004 |
| 98294_at   | 12.1    | 5.9     | 19.5    | 7.4     | 8.8     | 9.3     | 15      | 10.7    | 0.938634463 | 11.225    | 10.95    | 0.275    | 1.025114155 | 0.8405   | -1.063 |
| 98295_at   | 193.8   | 236.3   | 169.9   | 267.2   | 225.9   | 179.4   | 245.4   | 259.8   | 0.711814502 | 216.8     | 227.625  | 10.825   | 0.952443712 | 0.6901   | -1.056 |
| 98296_at   | 83.3    | 133.2   | 35.2    | 105.2   | 147.6   | 122.9   | 85.1    | 107.5   | 0.327626553 | 89.225    | 115.775  | 26.55    | 0.77067588  | 0.3067   | 1.418  |
| 98297_at   | 7.1     | 9.1     | 7.8     | 7.1     | 4.2     | 2.1     | 7       | 6.7     | 0.090156169 | 7.775     | 5        | 2.775    | 1.555       | 0.1099   | -1.716 |
| 98298_at   | 249.9   | 208.5   | 237.7   | 232.5   | 282.6   | 190.5   | 202.6   | 266.8   | 0.894386332 | 232.15    | 235.625  | 3.475    | 0.985251989 | 0.9812   | -1.003 |
| 98299_s_at | 5       | 21.1    | 18.2    | 12.5    | 14.6    | 21.4    | 19.8    | 30.1    | 0.180263012 | 14.2      | 21.475   | 7.275    | 0.661233993 | 0.2006   | 1.671  |
| 98300_at   | 60.8    | 20.9    | 13.7    | 6.8     | 13.2    | 17.4    | 14.5    | 62.3    | 0.941303662 | 25.55     | 26.85    | 1.3      | 0.951582868 | 0.8177   | 1.151  |
| 98301_at   | 8.9     | 9.4     | 48.4    | 61.6    | 41.4    | 36.9    | 9.8     | 26      | 0.825852803 | 32.075    | 28.525   | 3.55     | 1.124452235 | 0.8641   | 1.115  |
| 98302_at   | 5.9     | 14.5    | 4.7     | 6.3     | 9       | 23.7    | 19.2    | 6.6     | 0.209116378 | 7.85      | 14.625   | 6.775    | 0.536752137 | 0.1779   | 1.812  |
| 98303_at   | 222.9   | 197.9   | 214.5   | 203.8   | 237     | 210.3   | 220.9   | 220.2   | 0.167001887 | 209.775   | 222.1    | 12.325   | 0.944506979 | 0.165    | -1.059 |
| 98304_at   | 40.9    | 41.7    | 51.8    | 38.1    | 28.5    | 55.5    | 50.4    | 78      | 0.406307122 | 43.125    | 53.1     | 9.975    | 0.812146893 | 0.5106   | 1.166  |
| 98305_at   | 42.2    | 319.3   | 283.2   | 242.1   | 148.9   | 235     | 178.5   | 132.3   | 0.508455576 | 221.7     | 173.675  | 48.025   | 1.27652224  | 0.957    | -1.028 |
| 98306_g_at | 487.9   | 644.6   | 807.4   | 707.3   | 767.9   | 582.6   | 650.7   | 544.9   | 0.771803249 | 661.8     | 636.525  | 25.275   | 1.039707788 | 0.8197   | -1.032 |
| 98307_at   | 80.8    | 41.4    | 103.6   | 18      | 69      | 86.4    | 104.5   | 75      | 0.334758638 | 60.95     | 83.725   | 22.775   | 0.727978501 | 0.2575   | 1.653  |
| 98308_at   | 21.8    | 10.1    | 10.6    | 25.4    | 26.2    | 13.6    | 7.3     | 44.7    | 0.545958849 | 16.975    | 22.95    | 5.975    | 0.739651416 | 0.7283   | 1.182  |
| 98309_at   | 40.5    | 40.8    | 54.2    | 63.6    | 52.3    | 56.9    | 84      | 52.8    | 0.263432808 | 49.775    | 61.5     | 11.725   | 0.809349593 | 0.23     | 1.235  |
| 98310_at   | 48.7    | 43.2    | 108.4   | 68.8    | 48.7    | 101.9   | 67      | 91.1    | 0.621995216 | 67.275    | 77.175   | 9.9      | 0.871720117 | 0.558    | 1.178  |
| 98311_at   | 34.8    | 70.4    | 29.4    | 14.2    | 33.1    | 15.7    | 25.7    | 75.8    | 0.983874977 | 37.2      | 37.575   | 0.375    | 0.99001996  | 0.9938   | -1.004 |
| 98312_at   | 58.4    | 70.1    | 62.2    | 80.7    | 61.5    | 115.5   | 96.5    | 88.3    | 0.136538778 | 67.85     | 90.45    | 22.6     | 0.750138198 | 0.1229   | 1.31   |
| 98313_at   | 177.3   | 399.6   | 185.2   | 206     | 375.8   | 440.1   | 424.5   | 303     | 0.06739187  | 242.025   | 385.85   | 143.825  | 0.627251523 | 0.04745  | 1.675  |
| 98314_g_at | 276.5   | 407.4   | 271.1   | 240.6   | 358.5   | 414.3   | 340.7   | 335.1   | 0.193805661 | 298.9     | 362.15   | 63.25    | 0.825348612 | 0.1429   | 1.233  |
| 98315_at   | 32.5    | 36.3    | 33.1    | 63.2    | 55.1    | 50.5    | 55.2    | 45.7    | 0.257869075 | 41.275    | 51.625   | 10.35    | 0.799515738 | 0.1615   | 1.298  |
| 98316_at   | 66.7    | 63.6    | 60.2    | 174.2   | 104.1   | 55.4    | 16.9    | 74.7    | 0.429894608 | 91.175    | 62.775   | 28.4     | 1.452409399 | 0.3727   | -1.572 |
| 98317_at   | 97.7    | 29.6    | 28.3    | 28.9    | 98.5    | 53.5    | 157.3   | 31.3    | 0.286255778 | 46.125    | 85.15    | 39.025   | 0.541691133 | 0.2468   | 1.818  |
| 98318_at   | 41.7    | 40.3    | 42.4    | 36.5    | 46      | 30.9    | 131.8   | 47      | 0.377448167 | 40.225    | 63.925   | 23.7     | 0.629253031 | 0.3672   | 1.356  |
| 98319_at   | 39      | 11.3    | 51.3    | 53.4    | 40.8    | 83.4    | 62.8    | 39.4    | 0.256406076 | 38.75     | 56.6     | 17.85    | 0.684628975 | 0.2781   | 1.627  |
| 98320_at   | 16.1    | 7.6     | 31      | 32.7    | 40.3    | 79      | 34      | 38.4    | 0.085235663 | 21.85     | 47.925   | 26.075   | 0.455920709 | 0.06587  | 2.403  |
| 98321_at   | 27      | 14.2    | 29.5    | 14.5    | 13.1    | 20.2    | 15.9    | 15      | 0.293660933 | 21.3      | 16.05    | 5.25     | 1.327102804 | 0.3139   | -1.268 |
| 98322_at   | 221.1   | 180.3   | 234.6   | 170.3   | 190     | 223.6   | 182.2   | 270.9   | 0.576432842 | 201.575   | 216.675  | 15.1     | 0.930310373 | 0.5843   | -1.071 |
| 98323_at   | 36.7    | 27      | 27.4    | 39.5    | 18.3    | 38.2    | 56.3    | 55.5    | 0.381245806 | 32.65     | 42.075   | 9.425    | 0.775995247 | 0.5536   | 1.193  |
| 98324_at   | 44.8    | 58      | 46.5    | 56.1    | 56.2    | 48.5    | 63.3    | 88.6    | 0.243477412 | 51.35     | 64.15    | 12.8     | 0.800467654 | 0.2078   | 1.226  |
| 98325_at   | 0.7     | 2.1     | 2.5     | 1.1     | 1.8     | 0.5     | 1.1     | 2.3     | 0.77173685  | 1.6       | 1.425    | 0.175    | 1.122807018 | 0.7553   | -1.153 |
| 98326_f_at | 1.3     | 3.3     | 1.3     | 1.4     | 1.4     | 1.1     | 2.7     | 2.5     | 0.879719753 | 1.825     | 1.925    | 0.1      | 0.948051948 | 0.8702   | -1.056 |
| 98327_at   | 1.6     | 0.8     | 1.2     | 2.1     | 5.7     | 25.7    | 2.2     | 2.1     | 0.276681381 | 1.425     | 8.925    | 7.5      | 0.159663866 | 0.0743   | 3.799  |
| 98328_at   | 3.1     | 4.2     | 1.5     | 18.9    | 1       | 1.7     | 7       | 2.8     | 0.425973076 | 6.925     | 3.125    | 3.8      | 2.216       | 0.4213   | -1.789 |
| 98329_at   | 47.7    | 39.2    | 11.9    | 54.4    | 11.5    | 27      | 50.1    | 46.5    | 0.738937702 | 38.3      | 33.775   | 4.525    | 1.133974833 | 0.7987   | -1.138 |
| 98330_at   | 119.4   | 113.1   | 130.2   | 138.1   | 79.2    | 67.3    | 51.7    | 78.1    | 0.000613504 | 125.2     | 69.075   | 56.125   | 1.81252262  | 0.001395 | -1.833 |
| 98331_at   | 7822.5  | 9727.6  | 8430.3  | 10064.8 | 13072.6 | 9443.3  | 12020.8 | 11471.7 | 0.040800974 | 9011.3    | 11502.1  | 2490.8   | 0.78344824  | 0.03742  | 1.274  |
| 98332_at   | 94.4    | 66.8    | 63.4    | 130.9   | 29.9    | 117.8   | 74      | 150.8   | 0.895058211 | 88.875    | 93.125   | 4.25     | 0.954362416 | 0.8614   | -1.075 |
| 98333_at   | 18949.9 | 19830.2 | 20197.2 | 16870   | 33040.2 | 16919.1 | 21942.9 | 18177.6 | 0.40676962  | 18961.825 | 22519.95 | 3558.125 | 0.842001203 | 0.4065   | 1.149  |
| 98334_at   | 3.6     | 8       | 7.6     | 15.7    | 6.1     | 5       | 9.3     | 7.6     | 0.558664574 | 8.725     | 7        | 1.725    | 1.246428571 | 0.7306   | -1.126 |
| 98335_at   | 1189.3  | 857.3   | 939.4   | 876.9   | 806     | 1011.4  | 784.9   | 861.5   | 0.32578019  | 965.725   | 865.95   | 99.775   | 1.115220278 | 0.3057   | -1.111 |
| 98336_s_at | 196.1   | 149.6   | 116.5   | 164.6   | 87.5    | 177.1   | 41.6    | 138     | 0.238616854 | 156.7     | 111.05   | 45.65    | 1.411076092 | 0.2189   | -1.586 |
| 98337_at   | 99.7    | 29.9    | 86.2    | 84.2    | 172.4   | 49.9    | 156.6   | 124     | 0.168860716 | 75        | 125.725  | 50.725   | 0.596540068 | 0.2449   | 1.667  |
| 98338_at   | 52.9    | 69.9    | 93.4    | 135.1   | 80.4    | 99.6    | 75      | 132.3   | 0.698255392 | 87.825    | 96.825   | 9        | 0.907048799 | 0.5969   | 1.142  |
| 98339_at   | 235     | 186.7   | 200.6   | 226.3   | 219.1   | 210.5   | 190.6   | 207.2   | 0.694952484 | 212.15    | 206.85   | 5.3      | 1.025622432 | 0.7256   | -1.023 |
| 98340_at   | 53.3    | 114.5   | 86.4    | 99      | 89.2    | 120.1   | 105.6   | 126.5   | 0.211214311 | 88.3      | 110.35   | 22.05    | 0.800181242 | 0.2174   | 1.287  |
| 98341_f_at | 254.9   | 202.2   | 241.1   | 198.5   | 293.6   | 250     | 291.7   | 137.6   | 0.653438974 | 224.175   | 243.225  | 19.05    | 0.921677459 | 0.8234   | -1.045 |
| 98342_at   | 15921.8 | 17429   | 16893.3 | 14788.5 | 30482.9 | 14787   | 20616.6 | 15673.9 | 0.33588939  | 16258.15  | 20390.1  | 4131.95  | 0.797355089 | 0.3141   | 1.204  |
| 98343_s_at | 21      | 32.2    | 14.5    | 24.6    | 4.1     | 7.1     | 23.4    | 17.7    | 0.138985888 | 23.075    | 13.075   | 10       | 1.764818356 | 0.137    | -2.122 |



|            |        |        |        |        |        |        |        |        |             |          |          |        |             |         |        |
|------------|--------|--------|--------|--------|--------|--------|--------|--------|-------------|----------|----------|--------|-------------|---------|--------|
| 98344_f_at | 708.8  | 763    | 854.4  | 661.3  | 838.5  | 1036.2 | 1062.8 | 675    | 0.189999882 | 746.875  | 903.125  | 156.25 | 0.826989619 | 0.1857  | 1.195  |
| 98345_at   | 7      | 14     | 3.7    | 21.6   | 3.6    | 11.3   | 19.4   | 4.2    | 0.731722897 | 11.575   | 9.625    | 1.95   | 1.202597403 | 0.7175  | -1.238 |
| 98346_at   | 317    | 380    | 272.8  | 345.7  | 635.1  | 271.8  | 374.3  | 465.5  | 0.259753857 | 328.875  | 436.675  | 107.8  | 0.753134482 | 0.2525  | 1.276  |
| 98347_at   | 11.9   | 1.6    | 23.6   | 18.8   | 2.3    | 5.2    | 1.3    | 4.3    | 0.10892403  | 13.975   | 3.275    | 10.7   | 4.267175573 | 0.1321  | -3.328 |
| 98348_at   | 143.1  | 120.7  | 112.9  | 113.6  | 79.7   | 83.4   | 114.6  | 90     | 0.027623764 | 122.575  | 91.925   | 30.65  | 1.333423987 | 0.02412 | -1.341 |
| 98349_at   | 645.5  | 551.5  | 633.3  | 606    | 387.1  | 774    | 372.7  | 426.1  | 0.302630002 | 609.075  | 489.975  | 119.1  | 1.243073626 | 0.181   | -1.302 |
| 98350_at   | 51     | 56.5   | 75.1   | 56     | 71.2   | 36.8   | 48.9   | 54.8   | 0.480798241 | 59.65    | 52.925   | 6.725  | 1.127066604 | 0.4283  | -1.146 |
| 98351_g_at | 104.7  | 78.2   | 22.3   | 118.8  | 80.7   | 98.3   | 101.9  | 132.5  | 0.397108937 | 81       | 103.35   | 22.35  | 0.783744557 | 0.3524  | 1.492  |
| 98352_r_at | 49.1   | 70.5   | 71.2   | 72.3   | 92.8   | 70.8   | 89.4   | 66.9   | 0.149690692 | 65.775   | 79.975   | 14.2   | 0.822444514 | 0.1635  | 1.219  |
| 98353_at   | 8.6    | 11.1   | 18.4   | 11.3   | 56.7   | 9.5    | 47.8   | 5.2    | 0.276397061 | 12.35    | 29.8     | 17.45  | 0.41442953  | 0.4649  | 1.612  |
| 98354_at   | 11.9   | 11.3   | 15.9   | 15.6   | 6.7    | 9.3    | 12.6   | 23.3   | 0.865076584 | 13.675   | 12.975   | 0.7    | 1.053949904 | 0.615   | -1.16  |
| 98355_at   | 217.1  | 189.9  | 195.8  | 214    | 200.5  | 198.5  | 197    | 196.8  | 0.437476407 | 204.2    | 198.2    | 6      | 1.030272452 | 0.4272  | -1.029 |
| 98356_at   | 225.3  | 267.4  | 334.1  | 372.9  | 396.1  | 209.4  | 236.3  | 447.2  | 0.754180988 | 299.925  | 322.25   | 22.325 | 0.93072149  | 0.8648  | -1.04  |
| 98357_at   | 36.3   | 45.5   | 46.5   | 92.3   | 61.3   | 38.3   | 66     | 90.2   | 0.613201272 | 55.15    | 63.95    | 8.8    | 0.862392494 | 0.5506  | 1.185  |
| 98358_at   | 9.3    | 5.6    | 11.6   | 12.4   | 10     | 7      | 8.6    | 10.2   | 0.669367836 | 9.725    | 8.95     | 0.775  | 1.086592179 | 0.8078  | -1.052 |
| 98360_at   | 124.1  | 164.5  | 192.6  | 150.4  | 190.6  | 151.7  | 182    | 163.5  | 0.440502368 | 157.9    | 171.95   | 14.05  | 0.918290201 | 0.4078  | -1.098 |
| 98361_at   | 94.4   | 169.1  | 157    | 141.8  | 58     | 144.2  | 69.6   | 85.5   | 0.089222577 | 140.575  | 89.325   | 51.25  | 1.573747551 | 0.08229 | -1.635 |
| 98362_s_at | 21.3   | 23     | 21.6   | 29.1   | 18.7   | 45.7   | 39.2   | 20.1   | 0.374005646 | 23.75    | 30.925   | 7.175  | 0.767987065 | 0.4477  | 1.215  |
| 98363_at   | 12.7   | 5.5    | 3.4    | 2.7    | 1      | 17.9   | 15.9   | 0.9    | 0.607494737 | 6.075    | 8.925    | 2.85   | 0.680672269 | 0.8046  | -1.263 |
| 98364_at   | 30.9   | 41.6   | 16.4   | 17.9   | 23.2   | 27.3   | 28.2   | 35     | 0.801570982 | 26.7     | 28.425   | 1.725  | 0.939313984 | 0.6163  | 1.134  |
| 98365_at   | 58.9   | 65.4   | 75.8   | 85.2   | 92.6   | 59.1   | 60.6   | 55.1   | 0.684622573 | 71.325   | 66.85    | 4.475  | 1.066940912 | 0.6079  | -1.081 |
| 98366_at   | 129.6  | 171.3  | 111.1  | 164.5  | 74.3   | 201.9  | 93.9   | 118    | 0.518064401 | 144.125  | 122.025  | 22.1   | 1.181110428 | 0.3827  | -1.25  |
| 98367_at   | 47.4   | 77.1   | 92.5   | 104.1  | 65.7   | 95.7   | 120.9  | 126.2  | 0.282929593 | 80.275   | 102.125  | 21.85  | 0.786046512 | 0.3152  | 1.285  |
| 98368_at   | 4      | 5.1    | 3.8    | 6.7    | 5.9    | 4.4    | 6.2    | 5.7    | 0.44010824  | 4.9      | 5.55     | 0.65   | 0.882882883 | 0.3663  | 1.16   |
| 98369_f_at | 2158.5 | 1959.7 | 2056.6 | 1990.8 | 1746.8 | 2245.6 | 1930.4 | 1970.9 | 0.576163847 | 2041.4   | 1973.425 | 67.975 | 1.03444519  | 0.53    | -1.038 |
| 98370_at   | 60.1   | 90.7   | 149.7  | 51.1   | 44.2   | 27.5   | 170.9  | 141    | 0.855662572 | 87.9     | 95.9     | 8      | 0.916579771 | 0.8669  | -1.092 |
| 98371_at   | 49.3   | 28.3   | 55.7   | 56.2   | 46.3   | 82.1   | 57.5   | 15.3   | 0.857367498 | 47.375   | 50.3     | 2.925  | 0.941848907 | 0.8721  | -1.069 |
| 98372_at   | 200.8  | 148.1  | 172.3  | 151.7  | 219.5  | 222.8  | 188.7  | 169.5  | 0.119870443 | 168.225  | 200.125  | 31.9   | 0.840599625 | 0.1171  | 1.191  |
| 98373_at   | 43.9   | 8.4    | 30.8   | 28.6   | 20.8   | 22     | 10.4   | 49     | 0.836731686 | 27.925   | 25.55    | 2.375  | 1.09295499  | 0.866   | -1.088 |
| 98374_at   | 33.1   | 32.9   | 46.7   | 66.1   | 31.4   | 31.2   | 33.5   | 74.6   | 0.883733629 | 44.7     | 42.675   | 2.025  | 1.04745167  | 0.7809  | -1.082 |
| 98375_at   | 48.5   | 48.4   | 36.8   | 22.5   | 28.2   | 50.3   | 36.7   | 23.8   | 0.630474717 | 39.05    | 34.75    | 4.3    | 1.123741007 | 0.66    | -1.119 |
| 98376_at   | 22.3   | 4      | 10.1   | 6.6    | 10.9   | 14.9   | 8.3    | 14.5   | 0.763672027 | 10.75    | 12.15    | 1.4    | 0.884773663 | 0.4692  | 1.351  |
| 98379_r_at | 392.9  | 472.5  | 477.2  | 334.7  | 388.9  | 436.7  | 294.4  | 429.3  | 0.524158237 | 419.325  | 387.325  | 32     | 1.082617956 | 0.5396  | -1.084 |
| 98380_at   | 87     | 97.8   | 65.3   | 224.1  | 109.7  | 67.7   | 129.6  | 214.1  | 0.81240028  | 118.55   | 130.275  | 11.725 | 0.909998081 | 0.7357  | 1.134  |
| 98381_at   | 28     | 18.9   | 11.8   | 21.5   | 47.8   | 12.6   | 24.2   | 13.3   | 0.644340146 | 20.05    | 24.475   | 4.425  | 0.819203269 | 0.8059  | 1.097  |
| 98382_f_at | 31.5   | 42.4   | 17     | 17.9   | 74.8   | 29.9   | 51.3   | 79.4   | 0.063172508 | 27.2     | 58.85    | 31.65  | 0.462192014 | 0.04935 | 2.176  |
| 98383_r_at | 48.7   | 61.9   | 63.8   | 101    | 84.2   | 76.3   | 94.8   | 119.8  | 0.142045289 | 68.85    | 93.775   | 24.925 | 0.734204212 | 0.117   | 1.392  |
| 98384_at   | 3.2    | 13     | 26.1   | 21.4   | 30.5   | 26     | 4.7    | 6.8    | 0.901215137 | 15.925   | 17       | 1.075  | 0.936764706 | 0.9752  | -1.022 |
| 98385_at   | 98     | 90.7   | 121.2  | 116.4  | 153.5  | 112.6  | 116    | 92.9   | 0.443851541 | 106.575  | 118.75   | 12.175 | 0.897473684 | 0.4558  | -1.104 |
| 98386_s_at | 187.3  | 240.3  | 220.6  | 226.8  | 164.4  | 203.3  | 191.6  | 214.6  | 0.156003585 | 218.75   | 193.475  | 25.275 | 1.130637033 | 0.167   | -1.131 |
| 98387_at   | 8.9    | 10     | 10.8   | 7.5    | 8.5    | 7.4    | 8.2    | 12.6   | 0.930710969 | 9.3      | 9.175    | 0.125  | 1.013623978 | 0.8728  | -1.024 |
| 98388_at   | 29.6   | 18.9   | 9.4    | 31.8   | 31.7   | 66.4   | 14.5   | 36.9   | 0.275244576 | 22.425   | 37.375   | 14.95  | 0.6         | 0.3005  | 1.611  |
| 98389_at   | 40.8   | 11.3   | 18     | 42.8   | 18.5   | 13.6   | 51.6   | 15.7   | 0.788079028 | 28.225   | 24.85    | 3.375  | 1.135814889 | 0.7672  | -1.147 |
| 98390_at   | 101.8  | 127.3  | 147.7  | 199.8  | 129.3  | 165    | 173.9  | 126.6  | 0.857753509 | 144.15   | 148.7    | 4.55   | 0.969401479 | 0.7645  | -1.053 |
| 98391_at   | 14     | 7.3    | 4.9    | 3.8    | 12     | 14.8   | 5.6    | 31     | 0.227166788 | 7.5      | 15.85    | 8.35   | 0.47318612  | 0.1741  | 2.006  |
| 98392_at   | 53.7   | 71.9   | 63.4   | 87.1   | 44.4   | 142    | 93.3   | 119.4  | 0.242951891 | 69.025   | 99.775   | 30.75  | 0.691806565 | 0.3208  | 1.348  |
| 98394_at   | 3.3    | 2.7    | 3.7    | 4.5    | 6.8    | 5.3    | 3.4    | 4.4    | 0.146622398 | 3.55     | 4.975    | 1.425  | 0.713567839 | 0.1445  | 1.363  |
| 98395_at   | 11.4   | 12.4   | 67.4   | 13.2   | 11.5   | 17.4   | 12     | 18.8   | 0.478230205 | 26.1     | 14.925   | 11.175 | 1.748743719 | 0.5813  | -1.295 |
| 98397_at   | 349.6  | 234.3  | 266.1  | 329.3  | 260.6  | 387.3  | 277    | 273.6  | 0.908136668 | 294.825  | 299.625  | 4.8    | 0.983979975 | 0.9072  | -1.016 |
| 98398_s_at | 97.1   | 79     | 77.9   | 82.1   | 58.6   | 66.7   | 67.5   | 82.2   | 0.06112898  | 84.025   | 68.75    | 15.275 | 1.222181818 | 0.05582 | -1.227 |
| 98400_at   | 719.3  | 426.9  | 603.1  | 466.3  | 501.2  | 433.7  | 491.7  | 443.6  | 0.289905487 | 553.9    | 467.55   | 86.35  | 1.18468613  | 0.275   | -1.162 |
| 98401_at   | 11.4   | 12.9   | 21.5   | 6.8    | 24.2   | 9.3    | 16.4   | 44.2   | 0.271713315 | 13.15    | 23.525   | 10.375 | 0.558979809 | 0.2552  | 1.663  |
| 98402_at   | 2089.1 | 2055.1 | 1768.8 | 2400.9 | 1805.9 | 1844.2 | 2009.6 | 2380.8 | 0.723341553 | 2078.475 | 2010.125 | 68.35  | 1.034002861 | 0.7168  | -1.034 |
| 98403_at   | 409.5  | 618.1  | 493.7  | 584.8  | 632.8  | 613.3  | 588.9  | 568.9  | 0.213122307 | 526.525  | 600.975  | 74.45  | 0.876117975 | 0.1833  | 1.155  |
| 98404_at   | 4640.1 | 4896.8 | 5366.7 | 4418.3 | 4627.3 | 5207.9 | 5116   | 4253.6 | 0.925897486 | 4830.475 | 4801.2   | 29.275 | 1.006097434 | 0.9177  | -1.007 |
| 98405_at   | 569.1  | 372.8  | 452.3  | 431.5  | 371.3  | 459.3  | 409.8  | 531.3  | 0.810218128 | 456.425  | 442.925  | 13.5   | 1.030479201 | 0.824   | -1.027 |



|            |        |        |        |        |        |        |        |        |             |          |          |         |             |           |        |
|------------|--------|--------|--------|--------|--------|--------|--------|--------|-------------|----------|----------|---------|-------------|-----------|--------|
| 98406_at   | 8.1    | 12     | 9.6    | 7.2    | 12.1   | 4.7    | 13.5   | 6.9    | 0.975808171 | 9.225    | 9.3      | 0.075   | 0.991935484 | 0.834     | -1.061 |
| 98407_at   | 349.4  | 727.9  | 517.7  | 549.5  | 734.2  | 578.9  | 534.5  | 692.9  | 0.325162621 | 536.125  | 635.125  | 99      | 0.844125172 | 0.293     | 1.214  |
| 98408_at   | 56.4   | 92.5   | 63.9   | 62.9   | 84.9   | 78.5   | 35.4   | 101.1  | 0.724163506 | 68.925   | 74.975   | 6.05    | 0.919306435 | 0.9053    | -1.032 |
| 98409_at   | 472    | 386.4  | 348    | 389.4  | 353.3  | 398.8  | 393.3  | 532    | 0.680553932 | 398.95   | 419.35   | 20.4    | 0.951353285 | 0.6976    | -1.045 |
| 98410_at   | 221.1  | 201.7  | 266.2  | 193.9  | 225.7  | 245.5  | 213.5  | 303.3  | 0.346785502 | 220.725  | 247      | 26.275  | 0.893623482 | 0.3295    | 1.117  |
| 98413_at   | 1.2    | 5      | 3.1    | 1.5    | 6.3    | 4.7    | 3.6    | 5      | 0.085808405 | 2.7      | 4.9      | 2.2     | 0.551020408 | 0.0769    | 2.111  |
| 98414_at   | 10.6   | 10.3   | 10.4   | 10.1   | 23.9   | 15.5   | 13.5   | 9.9    | 0.169282401 | 10.35    | 15.7     | 5.35    | 0.659235669 | 0.09374   | 1.442  |
| 98415_at   | 922.2  | 830.3  | 903.6  | 819.4  | 674.8  | 782.4  | 569.7  | 921    | 0.178055585 | 868.875  | 736.975  | 131.9   | 1.178974863 | 0.1446    | -1.196 |
| 98416_at   | 545.1  | 564.6  | 633    | 480.7  | 643.9  | 412.1  | 488.2  | 515.6  | 0.5080062   | 555.85   | 514.95   | 40.9    | 1.079425187 | 0.4641    | -1.088 |
| 98417_at   | 6.1    | 3.2    | 6.3    | 32.1   | 13.9   | 22.6   | 27.9   | 27     | 0.213471963 | 11.925   | 22.85    | 10.925  | 0.521881838 | 0.09641   | 2.775  |
| 98418_at   | 367.9  | 725.3  | 482.9  | 562.7  | 583.4  | 604.8  | 716.3  | 665.6  | 0.254338796 | 534.7    | 642.525  | 107.825 | 0.832185518 | 0.2088    | 1.234  |
| 98419_at   | 129.4  | 138.4  | 168.6  | 146.5  | 200.3  | 137.4  | 154.9  | 172.6  | 0.249877066 | 145.725  | 166.3    | 20.575  | 0.876277811 | 0.2422    | 1.135  |
| 98420_at   | 11.1   | 11.8   | 24.7   | 13.8   | 26.4   | 18     | 44.5   | 20.9   | 0.137767162 | 15.35    | 27.45    | 12.1    | 0.559198543 | 0.07862   | 1.77   |
| 98421_at   | 7.8    | 11.2   | 12     | 5.9    | 6.7    | 7.4    | 7.5    | 11.3   | 0.5948556   | 9.225    | 8.225    | 1       | 1.121580547 | 0.6628    | -1.097 |
| 98423_at   | 61.1   | 75.7   | 75.1   | 66.2   | 71.4   | 76.4   | 48.7   | 78.6   | 0.926815692 | 69.525   | 68.775   | 0.75    | 1.010905125 | 0.8532    | -1.024 |
| 98424_at   | 359    | 653.6  | 543    | 557.9  | 579.1  | 493.9  | 595.1  | 684.8  | 0.448552114 | 528.375  | 588.225  | 59.85   | 0.898253219 | 0.4249    | 1.132  |
| 98426_at   | 202.6  | 239.2  | 185.2  | 205.2  | 175    | 219.5  | 177.9  | 287    | 0.822591286 | 208.05   | 214.85   | 6.8     | 0.968350012 | 0.9057    | -1.016 |
| 98427_s_at | 693.2  | 875.3  | 695.6  | 786.6  | 599.5  | 663.7  | 679.1  | 693.1  | 0.092113637 | 762.675  | 658.85   | 103.825 | 1.157585186 | 0.06808   | -1.154 |
| 98428_at   | 159.7  | 184.3  | 169.6  | 208.9  | 166.8  | 173    | 186.2  | 141.3  | 0.370864245 | 180.625  | 166.825  | 13.8    | 1.082721415 | 0.3734    | -1.082 |
| 98429_at   | 986.4  | 1003.8 | 1062   | 1080.9 | 1152.4 | 1247.7 | 1195.3 | 1326.5 | 0.006584409 | 1033.275 | 1230.475 | 197.2   | 0.839736687 | 0.003486  | 1.19   |
| 98430_at   | 291.7  | 300.6  | 366.6  | 393.6  | 440    | 397.3  | 399.2  | 487.1  | 0.030512234 | 338.125  | 430.9    | 92.775  | 0.784694825 | 0.03081   | 1.28   |
| 98431_at   | 472.4  | 633.1  | 547.4  | 529.1  | 722.2  | 572.6  | 576.9  | 525.2  | 0.361034076 | 545.5    | 599.225  | 53.725  | 0.910342526 | 0.3497    | -1.097 |
| 98432_at   | 997.6  | 1417.3 | 1388.8 | 1518.1 | 1152.9 | 1364.3 | 1511   | 1565.5 | 0.660590088 | 1330.45  | 1398.425 | 67.975  | 0.951391744 | 0.6503    | -1.057 |
| 98433_at   | 255.8  | 241.3  | 252.3  | 236.3  | 170.4  | 213.4  | 201.8  | 220    | 0.019357018 | 246.425  | 201.4    | 45.025  | 1.223560079 | 0.01387   | -1.229 |
| 98434_at   | 643.1  | 860.5  | 707.1  | 770.3  | 663.2  | 778.6  | 907.8  | 757.9  | 0.660459184 | 745.25   | 776.875  | 31.625  | 0.959292035 | 0.6624    | -1.042 |
| 98435_at   | 42.5   | 70.6   | 41.7   | 43.3   | 82     | 52.7   | 36.4   | 97     | 0.314030393 | 49.525   | 67.025   | 17.5    | 0.738903394 | 0.3508    | 1.295  |
| 98436_s_at | 522.1  | 398.2  | 326.2  | 379.9  | 422.4  | 616.8  | 366.7  | 503.8  | 0.342455707 | 406.6    | 477.425  | 70.825  | 0.851652092 | 0.3352    | 1.169  |
| 98437_at   | 516.6  | 517.3  | 558.4  | 630    | 513.9  | 732.4  | 692.2  | 504.1  | 0.442839973 | 555.575  | 610.65   | 55.075  | 0.90980922  | 0.4697    | -1.087 |
| 98438_f_at | 279.5  | 281    | 322.8  | 276.8  | 207    | 357.8  | 273.8  | 302.3  | 0.892623057 | 290.025  | 285.225  | 4.8     | 1.016828819 | 0.7882    | -1.034 |
| 98439_at   | 284.4  | 237.8  | 238.9  | 233.8  | 165.2  | 236.3  | 176.9  | 222.2  | 0.064815853 | 248.725  | 200.15   | 48.575  | 1.24269298  | 0.06125   | -1.253 |
| 98440_at   | 4795.9 | 3377.4 | 3676.5 | 3467.7 | 1551.2 | 1746.2 | 1650.2 | 1465.9 | 0.005570441 | 3829.375 | 1603.375 | 2226    | 2.388321509 | 0.0000685 | -2.369 |
| 98441_at   | 639.6  | 822.6  | 799.6  | 779.8  | 989.8  | 787.8  | 832    | 860.3  | 0.123991028 | 760.4    | 867.475  | 107.075 | 0.876567048 | 0.1273    | 1.142  |
| 98443_at   | 407.5  | 333.8  | 625.9  | 506    | 413.8  | 395.8  | 463.4  | 493.3  | 0.712188541 | 468.3    | 441.575  | 26.725  | 1.060521995 | 0.8165    | -1.036 |
| 98444_g_at | 28.5   | 60     | 49.9   | 44.9   | 43     | 39.6   | 39.8   | 43.5   | 0.557895899 | 45.825   | 41.475   | 4.35    | 1.104882459 | 0.6991    | -1.067 |
| 98445_at   | 34.1   | 206.3  | 192.1  | 185.6  | 211.5  | 119.9  | 173.5  | 129.4  | 0.932989153 | 154.525  | 158.575  | 4.05    | 0.974460035 | 0.6683    | 1.228  |
| 98446_s_at | 3816   | 2986.5 | 3417.2 | 3128.5 | 2207.7 | 3358.4 | 2562.5 | 2694.6 | 0.085137499 | 3337.05  | 2705.8   | 631.25  | 1.233295144 | 0.0783    | -1.242 |
| 98447_at   | 640    | 1070.2 | 1024.5 | 804.4  | 650.1  | 753.3  | 782.3  | 727.7  | 0.217507375 | 884.775  | 728.35   | 156.425 | 1.214766252 | 0.2096    | -1.193 |
| 98448_at   | 11.8   | 26.8   | 12     | 22.2   | 10.5   | 23.9   | 20.3   | 37.4   | 0.503039839 | 18.2     | 23.025   | 4.825   | 0.790445168 | 0.5642    | 1.229  |
| 98449_at   | 277.4  | 267.7  | 337.4  | 411.6  | 352.9  | 303.6  | 394.9  | 346.3  | 0.528057978 | 323.525  | 349.425  | 25.9    | 0.925878229 | 0.4668    | -1.092 |
| 98451_at   | 228.7  | 283.5  | 265    | 288.6  | 241.9  | 347.8  | 312.2  | 260.5  | 0.425825176 | 266.45   | 290.6    | 24.15   | 0.916896077 | 0.4447    | -1.084 |
| 98452_at   | 76.1   | 69.4   | 55.4   | 87.3   | 89.7   | 78.2   | 94.4   | 77     | 0.166548371 | 72.05    | 84.825   | 12.775  | 0.849395815 | 0.16      | 1.189  |
| 98453_at   | 22.1   | 12     | 29.2   | 25.7   | 30.2   | 24.9   | 75.1   | 115.7  | 0.161932671 | 22.25    | 61.475   | 39.225  | 0.361935746 | 0.08108   | 2.391  |
| 98454_at   | 359.4  | 631.9  | 477.8  | 429.3  | 436.6  | 585.3  | 574.5  | 543.5  | 0.41024014  | 474.6    | 534.975  | 60.375  | 0.887144259 | 0.361     | 1.144  |
| 98455_at   | 1289.2 | 1038.2 | 1022.5 | 1108.3 | 706.5  | 1279.6 | 1065.1 | 1102.5 | 0.599447334 | 1114.55  | 1038.425 | 76.125  | 1.073308135 | 0.541     | -1.093 |
| 98456_at   | 248.3  | 271.4  | 265.5  | 240.7  | 343.3  | 254.8  | 319.6  | 329.2  | 0.060333104 | 256.475  | 311.725  | 55.25   | 0.822760446 | 0.03932   | 1.209  |
| 98457_at   | 65.4   | 51.5   | 45.6   | 78.6   | 46.5   | 62.9   | 57.6   | 102    | 0.643200855 | 60.275   | 67.25    | 6.975   | 0.896282528 | 0.6835    | -1.092 |
| 98458_at   | 954    | 1313.4 | 1235.5 | 1070.3 | 2020.3 | 939.3  | 1416.3 | 1331.7 | 0.302289403 | 1143.3   | 1426.9   | 283.6   | 0.80124746  | 0.3072    | 1.212  |
| 98459_at   | 825.8  | 720.9  | 804.9  | 805.1  | 512.3  | 647.7  | 677.4  | 657    | 0.013369728 | 789.175  | 623.6    | 165.575 | 1.265514753 | 0.01487   | -1.271 |
| 98460_at   | 856.8  | 942.4  | 855.6  | 935.4  | 544.4  | 967.7  | 781.5  | 840.3  | 0.292220855 | 897.55   | 783.475  | 114.075 | 1.145601327 | 0.2596    | -1.169 |
| 98461_at   | 438.1  | 562.5  | 522.8  | 632.3  | 610.1  | 664.8  | 718    | 703.6  | 0.036032184 | 538.925  | 674.125  | 135.2   | 0.799443723 | 0.03508   | 1.259  |
| 98462_s_at | 95.9   | 87.4   | 71.3   | 104.5  | 73.9   | 125.5  | 90.2   | 76     | 0.911411143 | 89.775   | 91.4     | 1.625   | 0.982221007 | 0.9784    | -1.004 |
| 98463_at   | 709.9  | 1410.3 | 1019   | 1112.1 | 1183   | 1095.4 | 1253   | 983.1  | 0.694281432 | 1062.825 | 1128.625 | 65.8    | 0.94169897  | 0.5943    | -1.089 |
| 98464_at   | 158    | 310.8  | 201.5  | 268.8  | 207.6  | 226.6  | 266.4  | 176.5  | 0.708008723 | 234.775  | 219.275  | 15.5    | 1.070687493 | 0.7993    | -1.047 |
| 98465_f_at | 163.6  | 94.1   | 83.3   | 84     | 73.4   | 122.4  | 66.7   | 100.2  | 0.529655323 | 106.25   | 90.675   | 15.575  | 1.171767301 | 0.5188    | -1.157 |
| 98466_r_at | 15.2   | 6.2    | 9.4    | 10     | 25.3   | 16.9   | 19     | 16.5   | 0.015705888 | 10.2     | 19.425   | 9.225   | 0.525096525 | 0.01738   | 1.965  |
| 98467_at   | 14.3   | 28.8   | 29.7   | 48.5   | 23.9   | 8.7    | 12.6   | 42.3   | 0.443114196 | 30.325   | 21.875   | 8.45    | 1.386285714 | 0.3695    | -1.519 |



|            |        |        |        |        |        |        |        |        |             |          |          |          |             |          |        |
|------------|--------|--------|--------|--------|--------|--------|--------|--------|-------------|----------|----------|----------|-------------|----------|--------|
| 98468_r_at | 139    | 233    | 103.6  | 143.6  | 115.3  | 134.2  | 128.4  | 222.5  | 0.902713954 | 154.8    | 150.1    | 4.7      | 1.031312458 | 0.9266   | -1.022 |
| 98469_at   | 696.5  | 895    | 656.8  | 681.7  | 730.5  | 571.4  | 708.8  | 548.2  | 0.245706433 | 732.5    | 639.725  | 92.775   | 1.145023252 | 0.2301   | -1.145 |
| 98470_at   | 150.7  | 93.2   | 174.4  | 217.7  | 43.8   | 168.1  | 103.8  | 93.5   | 0.170481081 | 159      | 102.3    | 56.7     | 1.554252199 | 0.1801   | -1.653 |
| 98471_f_at | 82.6   | 254.4  | 201.9  | 37.4   | 137.2  | 205.4  | 46.9   | 189.8  | 0.990771279 | 144.075  | 144.825  | 0.75     | 0.994821336 | 0.8441   | 1.121  |
| 98472_at   | 62.2   | 62.7   | 69.9   | 55     | 76.5   | 86.6   | 131.8  | 100.1  | 0.052854904 | 62.45    | 98.75    | 36.3     | 0.632405063 | 0.01329  | 1.553  |
| 98473_at   | 53.9   | 37.1   | 43.8   | 57.7   | 62     | 44.9   | 39.6   | 114.2  | 0.397005617 | 48.125   | 65.175   | 17.05    | 0.738396624 | 0.4099   | 1.256  |
| 98474_r_at | 65.1   | 54.4   | 58.2   | 81.1   | 75.4   | 80.8   | 47.1   | 56.6   | 0.978720998 | 64.7     | 64.975   | 0.275    | 0.995767603 | 0.9621   | -1.008 |
| 98475_at   | 1652.2 | 1329   | 1419.8 | 1435.8 | 1554.5 | 1798.3 | 1622.2 | 1704.7 | 0.053233851 | 1459.2   | 1669.925 | 210.725  | 0.873811698 | 0.04921  | 1.146  |
| 98476_at   | 278    | 282.9  | 295.6  | 307.6  | 332.7  | 323.1  | 359.3  | 316.2  | 0.013427134 | 291.025  | 332.825  | 41.8     | 0.874408473 | 0.009941 | 1.143  |
| 98477_s_at | 94.2   | 113.5  | 84.6   | 90.8   | 190.5  | 132.4  | 178.1  | 134.5  | 0.01729305  | 95.775   | 158.875  | 63.1     | 0.602832415 | 0.004498 | 1.647  |
| 98478_at   | 1246.3 | 1307.2 | 1140.3 | 1445.2 | 1391.1 | 1359.7 | 1275.9 | 1418.3 | 0.335841093 | 1284.75  | 1361.25  | 76.5     | 0.943801653 | 0.3078   | -1.063 |
| 98479_f_at | 3.1    | 3.2    | 2.9    | 3.4    | 3.5    | 3.6    | 4.1    | 4.3    | 0.024130799 | 3.15     | 3.875    | 0.725    | 0.812903226 | 0.0138   | 1.238  |
| 98480_s_at | 2714.8 | 2713.4 | 3141.4 | 1817.1 | 3090   | 2649.2 | 2787.1 | 4584.8 | 0.25099714  | 2596.675 | 3277.775 | 681.1    | 0.792206604 | 0.2314   | 1.256  |
| 98481_at   | 82.5   | 42.5   | 58.6   | 79     | 40.5   | 77.2   | 56.1   | 49.3   | 0.449612527 | 65.65    | 55.775   | 9.875    | 1.17705065  | 0.4713   | -1.171 |
| 98482_at   | 120.7  | 193.9  | 170.5  | 121.4  | 133.7  | 174.4  | 182.3  | 199.2  | 0.402995744 | 151.625  | 172.4    | 20.775   | 0.87949536  | 0.3818   | 1.15   |
| 98483_at   | 280.2  | 484    | 361.5  | 388.5  | 439.3  | 515    | 504.3  | 476.7  | 0.081618993 | 378.55   | 483.825  | 105.275  | 0.782410996 | 0.06821  | 1.3    |
| 98484_at   | 204.1  | 168.8  | 221.5  | 195.7  | 249.3  | 252.3  | 285.2  | 223.4  | 0.01727377  | 197.525  | 252.55   | 55.025   | 0.782122352 | 0.01731  | 1.28   |
| 98485_at   | 92.2   | 110.4  | 79.1   | 102.4  | 65.2   | 116.7  | 110.6  | 105    | 0.813712177 | 96.025   | 99.375   | 3.35     | 0.966289308 | 0.9139   | -1.017 |
| 98486_at   | 164.5  | 140.9  | 146.4  | 162.3  | 220.8  | 204.7  | 169.8  | 124    | 0.311747868 | 153.525  | 179.825  | 26.3     | 0.853746698 | 0.3466   | 1.147  |
| 98488_at   | 19.1   | 2.4    | 3.3    | 9.5    | 5.4    | 17.5   | 11.9   | 45.5   | 0.296890121 | 8.575    | 20.075   | 11.5     | 0.427148194 | 0.2203   | 2.434  |
| 98489_at   | 348.7  | 270    | 312.2  | 278    | 319.4  | 297.7  | 237.4  | 194.3  | 0.287901458 | 302.225  | 262.2    | 40.025   | 1.152650648 | 0.2672   | -1.168 |
| 98490_at   | 424.3  | 368.4  | 332.1  | 355.7  | 281    | 406.8  | 277.1  | 239.4  | 0.161226847 | 370.125  | 301.075  | 69.05    | 1.229344848 | 0.1235   | -1.249 |
| 98491_at   | 590.8  | 552.9  | 554    | 665.5  | 301.6  | 582.9  | 471.4  | 497.8  | 0.117242235 | 590.8    | 463.425  | 127.375  | 1.274855694 | 0.12     | -1.307 |
| 98492_at   | 1038.7 | 994    | 1192.7 | 983.4  | 1065.1 | 1069   | 987.6  | 1141.6 | 0.822346276 | 1052.2   | 1065.825 | 13.625   | 0.987216476 | 0.7945   | -1.015 |
| 98493_at   | 629.4  | 622.5  | 657.6  | 658.4  | 534    | 427    | 498.2  | 504.3  | 0.003549608 | 641.975  | 490.875  | 151.1    | 1.307817673 | 0.001614 | -1.312 |
| 98495_at   | 1425.4 | 1150.1 | 1229.4 | 1086.5 | 1361.5 | 1195.3 | 1229.7 | 985.9  | 0.790492589 | 1222.85  | 1193.1   | 29.75    | 1.024935043 | 0.7803   | -1.026 |
| 98496_at   | 615.2  | 660    | 628.9  | 681.5  | 659.1  | 719.3  | 788.7  | 819.4  | 0.061387744 | 646.4    | 746.625  | 100.225  | 0.865762598 | 0.03972  | 1.152  |
| 98497_at   | 93.3   | 27.6   | 165.9  | 42.4   | 80.8   | 94.2   | 114.9  | 73.4   | 0.807861227 | 82.3     | 90.825   | 8.525    | 0.906138178 | 0.4721   | 1.372  |
| 98498_at   | 522.9  | 597.5  | 625.3  | 775    | 598.9  | 571.3  | 760.5  | 655.7  | 0.816105269 | 630.175  | 646.6    | 16.425   | 0.974597897 | 0.7818   | -1.03  |
| 98499_s_at | 365.8  | 338.4  | 439.4  | 337    | 302.9  | 510.4  | 330    | 345.6  | 0.970281369 | 370.15   | 372.225  | 2.075    | 0.994425415 | 0.9435   | -1.01  |
| 98500_at   | 51     | 41.2   | 37.3   | 56.9   | 29.2   | 37.4   | 34.5   | 56.4   | 0.370937191 | 46.6     | 39.375   | 7.225    | 1.183492063 | 0.3188   | -1.203 |
| 98501_at   | 28.4   | 5.8    | 34.5   | 41.9   | 13.6   | 29.7   | 28.9   | 34.6   | 0.920333387 | 27.65    | 26.7     | 0.95     | 1.035580524 | 0.7972   | 1.144  |
| 98502_at   | 473.5  | 377.2  | 418.6  | 472.5  | 510.6  | 412.3  | 404.7  | 467.3  | 0.71038474  | 435.45   | 448.725  | 13.275   | 0.970416179 | 0.7134   | -1.03  |
| 98503_at   | 764.5  | 759.4  | 646.7  | 758.3  | 462.4  | 628.8  | 571.9  | 696.1  | 0.05696948  | 732.225  | 589.8    | 142.425  | 1.241480163 | 0.05794  | -1.252 |
| 98504_at   | 413.3  | 463.5  | 459.4  | 615.6  | 258.7  | 536    | 391.5  | 411.7  | 0.266951555 | 487.95   | 399.475  | 88.475   | 1.22147819  | 0.2483   | -1.248 |
| 98505_i_at | 156.3  | 174.6  | 197.1  | 195.3  | 210.6  | 217.2  | 203.2  | 198.3  | 0.063839309 | 180.825  | 207.325  | 26.5     | 0.872181358 | 0.0521   | 1.151  |
| 98506_r_at | 82.7   | 125.6  | 73.6   | 90.9   | 104.9  | 108.8  | 95.4   | 79.9   | 0.769588082 | 93.2     | 97.25    | 4.05     | 0.958354756 | 0.6891   | -1.058 |
| 98507_at   | 89.7   | 86.7   | 107.7  | 161.4  | 171.7  | 127.4  | 167.3  | 115.4  | 0.180016718 | 111.375  | 145.45   | 34.075   | 0.765727054 | 0.1518   | 1.33   |
| 98508_s_at | 713.8  | 561.3  | 658.6  | 652.1  | 518.7  | 728    | 653.4  | 714    | 0.906301314 | 646.45   | 653.525  | 7.075    | 0.989174094 | 0.952    | -1.006 |
| 98509_at   | 832.8  | 1189.5 | 1086.9 | 931.3  | 799.8  | 1152   | 1017.9 | 1036.5 | 0.93943934  | 1010.125 | 1001.55  | 8.575    | 1.008561729 | 0.9464   | -1.008 |
| 98511_at   | 674.7  | 738    | 865.5  | 494.2  | 880    | 914.6  | 863.5  | 683.1  | 0.184270147 | 693.1    | 835.3    | 142.2    | 0.829761762 | 0.1887   | 1.222  |
| 98512_at   | 606.8  | 505.2  | 718.1  | 459.7  | 804    | 519.7  | 637.4  | 430.7  | 0.806329986 | 572.45   | 597.95   | 25.5     | 0.957354294 | 0.8572   | -1.032 |
| 98513_at   | 458    | 559.6  | 497.7  | 659.9  | 561    | 538.7  | 478    | 646.6  | 0.834558714 | 543.8    | 556.075  | 12.275   | 0.97792564  | 0.8054   | -1.026 |
| 98514_at   | 746.2  | 555.1  | 543.5  | 590    | 669.3  | 737.7  | 728.7  | 704.6  | 0.116079823 | 608.7    | 710.075  | 101.375  | 0.857233391 | 0.07745  | 1.175  |
| 98515_at   | 1575.5 | 1322.8 | 1493.7 | 1311.7 | 916.5  | 1308.4 | 957.4  | 1398.1 | 0.102857401 | 1425.925 | 1145.1   | 280.825  | 1.24524059  | 0.09187  | -1.263 |
| 98516_at   | 1997.3 | 1468.3 | 1708.6 | 1653.6 | 1443.7 | 1850.2 | 1636.2 | 1662   | 0.68438249  | 1706.95  | 1648.025 | 58.925   | 1.035754919 | 0.6992   | -1.033 |
| 98518_f_at | 6.5    | 4.8    | 7      | 6.7    | 6.1    | 5.8    | 8.6    | 11.2   | 0.284887491 | 6.25     | 7.925    | 1.675    | 0.788643533 | 0.2655   | 1.242  |
| 98519_r_at | 35.9   | 30.7   | 37.9   | 38.1   | 46.7   | 38     | 32.5   | 58.7   | 0.24407052  | 35.65    | 43.975   | 8.325    | 0.810687891 | 0.2204   | 1.208  |
| 98521_at   | 540    | 769.1  | 1058.3 | 474.9  | 708.8  | 922    | 655.5  | 484.3  | 0.914839241 | 710.575  | 692.65   | 17.925   | 1.025878871 | 0.9949   | -1.001 |
| 98522_at   | 1557.4 | 1646.9 | 1593.3 | 1447.1 | 2282.1 | 1391   | 1800.1 | 1476.4 | 0.450910059 | 1561.175 | 1737.4   | 176.225  | 0.898569702 | 0.4698   | 1.093  |
| 98523_at   | 130.5  | 189.5  | 218.5  | 156.6  | 221.5  | 163.8  | 214.1  | 198.9  | 0.312127241 | 173.775  | 199.575  | 25.8     | 0.870725291 | 0.2944   | 1.162  |
| 98524_f_at | 328.7  | 318.9  | 281.7  | 375.1  | 395.7  | 345.8  | 303.2  | 445.6  | 0.256546521 | 326.1    | 372.575  | 46.475   | 0.875260015 | 0.2557   | 1.137  |
| 98525_f_at | 1390.2 | 3689.8 | 3879   | 3310   | 5920.4 | 3597.9 | 5689.5 | 4332.1 | 0.062484673 | 3067.25  | 4884.975 | 1817.725 | 0.627894718 | 0.1016   | 1.68   |
| 98526_r_at | 248.4  | 272.2  | 252.6  | 273.7  | 284    | 286.5  | 266    | 288.7  | 0.059753727 | 261.725  | 281.3    | 19.575   | 0.930412371 | 0.05937  | -1.075 |
| 98527_at   | 732.7  | 857.1  | 889.2  | 663.4  | 1214.4 | 762.4  | 927.2  | 974.5  | 0.150253915 | 785.6    | 969.625  | 184.025  | 0.810210133 | 0.1339   | 1.226  |
| 98528_at   | 1365.4 | 1460.6 | 1568.5 | 1129   | 1936.3 | 1427.4 | 1542.5 | 1248.6 | 0.402995541 | 1380.875 | 1538.7   | 157.825  | 0.897429648 | 0.4102   | 1.108  |



|            |         |         |         |         |         |         |         |         |             |          |           |          |             |          |        |
|------------|---------|---------|---------|---------|---------|---------|---------|---------|-------------|----------|-----------|----------|-------------|----------|--------|
| 98529_at   | 3       | 26.2    | 6.7     | 15.7    | 6.6     | 17.5    | 4.5     | 32.5    | 0.783212897 | 12.9     | 15.275    | 2.375    | 0.844517185 | 0.7939   | 1.196  |
| 98530_at   | 310     | 424.2   | 240     | 291.2   | 263.3   | 403.6   | 308.5   | 425.3   | 0.55911629  | 316.35   | 350.175   | 33.825   | 0.90340544  | 0.5482   | 1.11   |
| 98531_g_at | 8257.4  | 6470.8  | 6323.5  | 6687.2  | 6662.1  | 6623.8  | 6408.5  | 7940.9  | 0.965131    | 6934.725 | 6908.825  | 25.9     | 1.003748828 | 0.9848   | -1.002 |
| 98532_at   | 3370.2  | 3013.2  | 3085.7  | 2613.4  | 2890    | 2877.1  | 3087.4  | 2888.3  | 0.634734054 | 3020.625 | 2935.7    | 84.925   | 1.028928365 | 0.6692   | -1.025 |
| 98533_at   | 2806.8  | 2442.8  | 2365    | 2214    | 3312.3  | 2503.5  | 3441.2  | 2006.1  | 0.381712908 | 2457.15  | 2815.775  | 358.625  | 0.872637196 | 0.4252   | 1.124  |
| 98534_at   | 94.4    | 106     | 125.5   | 92.8    | 81.7    | 138.5   | 110.7   | 136.8   | 0.462561023 | 104.675  | 116.925   | 12.25    | 0.895231986 | 0.52     | 1.102  |
| 98535_at   | 665.9   | 861     | 706.2   | 603.7   | 1092.4  | 749     | 818     | 807.4   | 0.15115345  | 709.2    | 866.7     | 157.5    | 0.81827622  | 0.1265   | 1.219  |
| 98538_at   | 516.4   | 550     | 619.8   | 606.4   | 494.3   | 576.8   | 638.6   | 582     | 0.995514247 | 573.15   | 572.925   | 0.225    | 1.000392722 | 0.98     | -1.002 |
| 98539_at   | 391.9   | 264.1   | 358.9   | 321.6   | 181.5   | 387     | 239.8   | 260.1   | 0.247026805 | 334.125  | 267.1     | 67.025   | 1.250935979 | 0.2084   | -1.285 |
| 98540_g_at | 1327.3  | 951.3   | 1009.7  | 1156.7  | 667.4   | 1276.4  | 891.1   | 1052.5  | 0.404459594 | 1111.25  | 971.85    | 139.4    | 1.143437773 | 0.3643   | -1.166 |
| 98543_at   | 746.3   | 482.2   | 597.5   | 556.4   | 578     | 759.9   | 618.5   | 655.8   | 0.433675862 | 595.6    | 653.05    | 57.45    | 0.912028175 | 0.3927   | 1.105  |
| 98544_at   | 800.3   | 765     | 698.5   | 734.6   | 917.2   | 704.2   | 868.5   | 811.9   | 0.204111997 | 749.6    | 825.45    | 75.85    | 0.908110727 | 0.1973   | -1.097 |
| 98545_at   | 2112.5  | 2403.5  | 2141.4  | 1832.6  | 2698    | 2265.5  | 2230.4  | 2145.2  | 0.258581133 | 2122.5   | 2334.775  | 212.275  | 0.909081175 | 0.2498   | -1.101 |
| 98547_at   | 844.7   | 1098.3  | 926     | 815.1   | 1949.3  | 845.7   | 1325.5  | 778.1   | 0.347258861 | 921.025  | 1224.65   | 303.625  | 0.752072021 | 0.3591   | 1.248  |
| 98549_at   | 66.4    | 94.5    | 23.2    | 84.2    | 52.7    | 90.9    | 82.1    | 65      | 0.768125063 | 67.075   | 72.675    | 5.6      | 0.922944616 | 0.6121   | 1.201  |
| 98550_at   | 1605.5  | 1947.8  | 1691.9  | 1769.5  | 2354.9  | 1699.6  | 2068.2  | 2019.3  | 0.128975425 | 1753.675 | 2035.5    | 281.825  | 0.861545075 | 0.1147   | 1.156  |
| 98552_at   | 553.5   | 484.5   | 641.3   | 395.8   | 465.3   | 525.9   | 319     | 387.8   | 0.221092757 | 518.775  | 424.5     | 94.275   | 1.222084806 | 0.2248   | -1.225 |
| 98553_at   | 4054    | 3738.2  | 2972.9  | 3294.6  | 2382.7  | 2127.5  | 2463.8  | 1904.7  | 0.006187365 | 3514.925 | 2219.675  | 1295.25  | 1.583531373 | 0.002251 | -1.581 |
| 98554_at   | 331.2   | 363     | 383.6   | 392.1   | 312.6   | 390.7   | 344     | 293.1   | 0.254896939 | 367.475  | 335.1     | 32.375   | 1.096612951 | 0.236    | -1.101 |
| 98555_at   | 2622.9  | 2310.1  | 1884.4  | 2578.4  | 2547.9  | 2793.9  | 2461.5  | 2395.9  | 0.345530933 | 2348.95  | 2549.8    | 200.85   | 0.921229116 | 0.3269   | -1.093 |
| 98556_at   | 15.7    | 25      | 65.5    | 47.9    | 70.2    | 82.9    | 59.8    | 68.4    | 0.059273251 | 38.525   | 70.325    | 31.8     | 0.547813722 | 0.06455  | 2.096  |
| 98557_f_at | 6713.3  | 5915.5  | 6453.9  | 5695.3  | 7302.1  | 5638.2  | 6205.2  | 6085.6  | 0.799716219 | 6194.5   | 6307.775  | 113.275  | 0.982042004 | 0.8202   | -1.016 |
| 98558_r_at | 2.4     | 1       | 1.8     | 0.9     | 4.3     | 1       | 3.3     | 2       | 0.229723599 | 1.525    | 2.65      | 1.125    | 0.575471698 | 0.2431   | 1.664  |
| 98559_at   | 43.1    | 253.1   | 220.8   | 45.7    | 60.7    | 90.5    | 90.4    | 48.2    | 0.311921284 | 140.675  | 72.45     | 68.225   | 1.94168392  | 0.4811   | -1.465 |
| 98560_at   | 712     | 683.9   | 654.4   | 761.7   | 481.4   | 558.5   | 521.3   | 625     | 0.007448492 | 703      | 546.55    | 156.45   | 1.286250114 | 0.007319 | -1.29  |
| 98561_at   | 1365.3  | 1395.1  | 1333.2  | 1251.2  | 2781.9  | 1706.1  | 1862.1  | 1745.2  | 0.072839993 | 1336.2   | 2023.825  | 687.625  | 0.660234951 | 0.0149   | 1.484  |
| 98562_at   | 503.7   | 490.7   | 606.5   | 533     | 765.9   | 682.7   | 592.5   | 553.8   | 0.090603179 | 533.475  | 648.725   | 115.25   | 0.822343828 | 0.06929  | 1.211  |
| 98563_f_at | 861     | 821.9   | 620.3   | 776.6   | 904.8   | 709.4   | 620.8   | 1037.2  | 0.675446214 | 769.95   | 818.05    | 48.1     | 0.941201638 | 0.7372   | -1.049 |
| 98564_f_at | 15266.9 | 16539.6 | 17307.3 | 14132.8 | 28170.8 | 14882.7 | 19461.9 | 14779.7 | 0.348830461 | 15811.65 | 19323.775 | 3512.125 | 0.818248505 | 0.3315   | 1.182  |
| 98565_at   | 4.3     | 8.9     | 10.1    | 3.8     | 16.6    | 2.3     | 18      | 25.8    | 0.166251668 | 6.775    | 15.675    | 8.9      | 0.432216906 | 0.3358   | 1.868  |
| 98568_at   | 8       | 7.4     | 7.3     | 7.1     | 8.1     | 5.7     | 5.3     | 26.4    | 0.49353648  | 7.45     | 11.375    | 3.925    | 0.654945055 | 0.6437   | 1.199  |
| 98569_at   | 417.2   | 318.8   | 492.7   | 506.6   | 412     | 489.3   | 484.3   | 611.7   | 0.315122889 | 433.825  | 499.325   | 65.5     | 0.868822911 | 0.3144   | 1.158  |
| 98570_at   | 5.9     | 9.8     | 6.4     | 5.3     | 7.6     | 6.8     | 9.6     | 7.3     | 0.446956955 | 6.85     | 7.825     | 0.975    | 0.875399361 | 0.3707   | 1.16   |
| 98571_s_at | 7570.8  | 8791.6  | 7032.3  | 7827.8  | 13022.4 | 8628.2  | 9688    | 6464.6  | 0.319413198 | 7805.625 | 9450.8    | 1645.175 | 0.825922144 | 0.3248   | 1.177  |
| 98572_at   | 437.4   | 575.1   | 523.9   | 528.2   | 574.8   | 592.6   | 720.2   | 648.7   | 0.03577882  | 516.15   | 634.075   | 117.925  | 0.814020423 | 0.03585  | 1.23   |
| 98573_r_at | 3109.4  | 3172.7  | 2737    | 2749.8  | 2552.7  | 2710.4  | 2577.9  | 2187    | 0.035462988 | 2942.225 | 2507      | 435.225  | 1.173603909 | 0.0381   | -1.175 |
| 98574_at   | 1934.7  | 1970.2  | 1631.3  | 2001.1  | 1534.3  | 1848.8  | 1849.7  | 2026    | 0.62074343  | 1884.325 | 1814.7    | 69.625   | 1.038367223 | 0.6197   | -1.04  |
| 98575_at   | 1192.3  | 1922.3  | 1297.6  | 1647.5  | 1926.4  | 1405.9  | 1973.8  | 1760.8  | 0.280233357 | 1514.925 | 1766.725  | 251.8    | 0.857476404 | 0.269    | 1.177  |
| 98577_f_at | 73.1    | 92.7    | 74.6    | 116.2   | 167.1   | 124.7   | 95.1    | 102.3   | 0.142598593 | 89.15    | 122.3     | 33.15    | 0.728945217 | 0.1122   | 1.363  |
| 98578_at   | 7.8     | 13.2    | 6       | 5.5     | 5.1     | 6.2     | 8.1     | 18.7    | 0.712997145 | 8.125    | 9.525     | 1.4      | 0.853018373 | 0.8089   | -1.092 |
| 98579_at   | 374.5   | 533.1   | 432.5   | 421.6   | 453.9   | 427.4   | 374.1   | 512.4   | 0.973523054 | 440.425  | 441.95    | 1.525    | 0.996549383 | 0.9588   | -1.005 |
| 98580_at   | 699.2   | 805.6   | 672.7   | 946.7   | 663.2   | 744.8   | 664.9   | 610.9   | 0.178831871 | 781.05   | 670.95    | 110.1    | 1.164095685 | 0.1482   | -1.156 |
| 98582_at   | 8.5     | 11.2    | 11.2    | 9.8     | 9.3     | 6.4     | 11.9    | 13      | 0.988316882 | 10.175   | 10.15     | 0.025    | 1.002463054 | 0.8539   | -1.034 |
| 98583_at   | 7       | 6.8     | 32.8    | 10.1    | 8.4     | 9.9     | 29      | 6.5     | 0.932120506 | 14.175   | 13.45     | 0.725    | 1.053903346 | 0.9952   | -1.003 |
| 98586_at   | 521.3   | 476.5   | 504.7   | 548.6   | 336.1   | 601.7   | 439.1   | 567.4   | 0.696734498 | 512.775  | 486.075   | 26.7     | 1.054929795 | 0.5892   | -1.081 |
| 98587_at   | 1626.9  | 1595.8  | 1640.7  | 1955.7  | 1318    | 1714.2  | 1565.2  | 1765.3  | 0.418026485 | 1704.775 | 1590.675  | 114.1    | 1.071730555 | 0.4075   | -1.075 |
| 98588_at   | 624.1   | 561.8   | 650.4   | 554.2   | 804.7   | 583.8   | 701.1   | 606.8   | 0.23717754  | 597.625  | 674.1     | 76.475   | 0.88655244  | 0.217    | -1.121 |
| 98589_at   | 1047.6  | 842     | 1014.5  | 765.7   | 882.3   | 941     | 884     | 739.2   | 0.517216372 | 917.45   | 861.625   | 55.825   | 1.064790367 | 0.5457   | -1.06  |
| 98590_at   | 462.1   | 440.9   | 446.9   | 418.2   | 506.7   | 424.6   | 427.2   | 599.3   | 0.336996968 | 442.025  | 489.45    | 47.425   | 0.903105527 | 0.3164   | -1.097 |
| 98593_at   | 1839.3  | 1423.7  | 1479.8  | 1544.5  | 596.4   | 1435.2  | 1127.1  | 1036.3  | 0.048856503 | 1571.825 | 1048.75   | 523.075  | 1.498760429 | 0.06058  | -1.564 |
| 98594_at   | 877.4   | 923.4   | 840.8   | 870.9   | 560.4   | 1042.1  | 1026    | 767.8   | 0.818075115 | 878.125  | 849.075   | 29.05    | 1.034213703 | 0.6814   | -1.066 |
| 98595_at   | 359.7   | 550.5   | 511.5   | 667.5   | 371     | 599.8   | 442.3   | 598.2   | 0.827700255 | 522.3    | 502.825   | 19.475   | 1.038731169 | 0.8502   | -1.035 |
| 98596_s_at | 916     | 901.9   | 1020    | 993.9   | 781.4   | 1037.6  | 1152.7  | 1061.2  | 0.586382941 | 957.95   | 1008.225  | 50.275   | 0.950135138 | 0.6548   | -1.043 |
| 98597_at   | 183.2   | 99.4    | 174.3   | 118     | 75.8    | 117.3   | 79.1    | 107.7   | 0.095908548 | 143.725  | 94.975    | 48.75    | 1.513292972 | 0.07415  | -1.491 |
| 98598_at   | 9.4     | 6.2     | 27.5    | 8.1     | 11.1    | 7.3     | 8.8     | 7.8     | 0.475468416 | 12.8     | 8.75      | 4.05     | 1.462857143 | 0.5589   | -1.234 |
| 98599_at   | 271.4   | 414.3   | 323.9   | 342.7   | 426.1   | 359.1   | 464.3   | 321.3   | 0.258463749 | 338.075  | 392.7     | 54.625   | 0.860898905 | 0.2563   | 1.163  |



|            |         |         |         |         |         |         |         |        |             |          |          |          |             |          |        |
|------------|---------|---------|---------|---------|---------|---------|---------|--------|-------------|----------|----------|----------|-------------|----------|--------|
| 98600_at   | 7441.4  | 5959.7  | 6724.1  | 6203.5  | 6624.9  | 6821    | 7188.5  | 6064.1 | 0.826987137 | 6582.175 | 6674.625 | 92.45    | 0.986149035 | 0.8044   | -1.016 |
| 98602_at   | 665.7   | 882.1   | 680.9   | 776.5   | 740.2   | 751.6   | 746.7   | 486.7  | 0.427809529 | 751.3    | 681.3    | 70       | 1.102744753 | 0.4245   | -1.113 |
| 98603_s_at | 399.9   | 488.9   | 409.3   | 516.5   | 366.6   | 398.5   | 345.7   | 265.7  | 0.0353259   | 453.65   | 344.125  | 109.525  | 1.318270977 | 0.04077  | -1.325 |
| 98604_at   | 1202.8  | 1034    | 1042.7  | 1044.7  | 805.1   | 1030.3  | 900.8   | 1137.2 | 0.237734335 | 1081.05  | 968.35   | 112.7    | 1.116383539 | 0.214    | -1.124 |
| 98605_at   | 508.7   | 504.2   | 513.5   | 444.9   | 597     | 508.5   | 584.4   | 531.1  | 0.060054802 | 492.825  | 555.25   | 62.425   | 0.887573165 | 0.05875  | 1.126  |
| 98606_s_at | 396.8   | 704.1   | 501.5   | 403.3   | 642.6   | 479.7   | 489.6   | 460.8  | 0.8483294   | 501.425  | 518.175  | 16.75    | 0.967675013 | 0.7475   | -1.053 |
| 98608_at   | 1411.9  | 1277.1  | 1471.9  | 1462.2  | 1277.2  | 1365    | 1113.6  | 1044.3 | 0.062896415 | 1405.775 | 1200.025 | 205.75   | 1.171454761 | 0.05845  | -1.176 |
| 98609_at   | 1192.4  | 1947.1  | 1708.4  | 1369.5  | 1648.4  | 1545.1  | 1692.4  | 1789.4 | 0.556388916 | 1554.35  | 1668.825 | 114.475  | 0.931403832 | 0.4711   | -1.092 |
| 98610_at   | 679.7   | 652.6   | 591.4   | 471     | 930.5   | 567.2   | 564.1   | 542.7  | 0.63883377  | 598.675  | 651.125  | 52.45    | 0.919447111 | 0.6751   | -1.069 |
| 98612_at   | 3.1     | 3.3     | 2.7     | 3.2     | 4       | 3.3     | 4.6     | 4.6    | 0.034763865 | 3.075    | 4.125    | 1.05     | 0.745454545 | 0.01539  | 1.33   |
| 98613_at   | 1301.4  | 863.5   | 1218.3  | 1032.7  | 1006.5  | 1151.4  | 1105    | 949.5  | 0.660998289 | 1103.975 | 1053.1   | 50.875   | 1.048309752 | 0.7234   | -1.038 |
| 98614_at   | 391.9   | 411.5   | 410.7   | 392.6   | 290     | 336.9   | 442.6   | 407.5  | 0.417111807 | 401.675  | 369.25   | 32.425   | 1.087813135 | 0.3503   | -1.102 |
| 98615_at   | 1874.2  | 1326.3  | 1553.2  | 1832.2  | 1255    | 1619    | 1438.1  | 1701.2 | 0.413687802 | 1646.475 | 1503.325 | 143.15   | 1.095222257 | 0.4346   | -1.092 |
| 98616_f_at | 391.9   | 302.5   | 230.9   | 296.9   | 369     | 469.3   | 431.9   | 546.8  | 0.024707463 | 305.55   | 454.25   | 148.7    | 0.672647221 | 0.02473  | 1.498  |
| 98617_at   | 1038.9  | 1282.4  | 1194.9  | 1163.9  | 981.7   | 1119.8  | 1219.6  | 1126.6 | 0.44019876  | 1170.025 | 1111.925 | 58.1     | 1.052251726 | 0.4468   | -1.052 |
| 98618_at   | 899.3   | 960.2   | 810.2   | 576.2   | 1426.8  | 665.9   | 786.9   | 547.8  | 0.841901281 | 811.475  | 856.85   | 45.375   | 0.947044407 | 0.9872   | -1.004 |
| 98619_at   | 857.4   | 762.2   | 752.3   | 662.8   | 952.5   | 737.2   | 873.5   | 776    | 0.272691409 | 758.675  | 834.8    | 76.125   | 0.908810494 | 0.2711   | 1.099  |
| 98621_at   | 58.4    | 67.7    | 25.7    | 106.1   | 79      | 98.1    | 72      | 51.8   | 0.598901984 | 64.475   | 75.225   | 10.75    | 0.857095381 | 0.4761   | 1.28   |
| 98622_at   | 8.2     | 7.7     | 21.2    | 6.9     | 10.1    | 13      | 30      | 10.8   | 0.428513169 | 11       | 15.975   | 4.975    | 0.6885759   | 0.3307   | 1.465  |
| 98623_g_at | 6079.2  | 6970    | 5889.3  | 6896.1  | 6137.9  | 6667.3  | 6248.7  | 6397   | 0.765014588 | 6458.65  | 6362.725 | 95.925   | 1.015076088 | 0.7947   | -1.013 |
| 98624_at   | 401     | 693.2   | 572.2   | 660.2   | 531.5   | 620.9   | 552.9   | 705.4  | 0.793976564 | 581.65   | 602.675  | 21.025   | 0.965113867 | 0.7273   | -1.052 |
| 98625_s_at | 7477.8  | 5794.6  | 7302.3  | 7096.9  | 5197.2  | 5191.6  | 5720    | 5564.5 | 0.023647089 | 6917.9   | 5418.325 | 1499.575 | 1.276759884 | 0.009025 | -1.272 |
| 98626_at   | 1929.9  | 1856.2  | 1848.8  | 1739.7  | 2538.6  | 1371.4  | 1691.9  | 1543.5 | 0.84040587  | 1843.65  | 1786.35  | 57.3     | 1.032076581 | 0.6769   | -1.061 |
| 98627_at   | 490.7   | 712.1   | 446.9   | 487.5   | 797.1   | 845.2   | 747     | 888.7  | 0.010615818 | 534.3    | 819.5    | 285.2    | 0.651982916 | 0.006994 | 1.557  |
| 98628_f_at | 4876.8  | 5549.9  | 5191    | 5504.3  | 5732.6  | 5702.7  | 6568.2  | 6283.6 | 0.026735083 | 5280.5   | 6071.775 | 791.275  | 0.869679789 | 0.02329  | 1.149  |
| 98629_f_at | 5431.1  | 5896.4  | 5262.6  | 5551.1  | 5656.1  | 6054.8  | 6267.5  | 5708.5 | 0.098772995 | 5535.3   | 5921.725 | 386.425  | 0.934744521 | 0.09659  | -1.07  |
| 98630_at   | 536     | 427.1   | 517.3   | 527.9   | 432.4   | 481.5   | 531     | 546    | 0.908025385 | 502.075  | 497.725  | 4.35     | 1.008739766 | 0.9106   | -1.009 |
| 98631_g_at | 854     | 713.5   | 844.2   | 749.5   | 627.2   | 762     | 736.3   | 737.1  | 0.156728856 | 790.3    | 715.65   | 74.65    | 1.104310766 | 0.1629   | -1.104 |
| 98632_at   | 285     | 241.4   | 346.1   | 253.3   | 481     | 253.2   | 293.5   | 336.9  | 0.334354344 | 281.45   | 341.15   | 59.7     | 0.825003664 | 0.3186   | 1.189  |
| 98633_at   | 1042.8  | 1394.1  | 1246.8  | 1114    | 1131.2  | 1195    | 1379.9  | 1181.5 | 0.821093177 | 1199.425 | 1221.9   | 22.475   | 0.981606514 | 0.7861   | -1.022 |
| 98635_at   | 722.2   | 715.7   | 1035.9  | 1090.9  | 627.2   | 1128.4  | 1120.7  | 532.5  | 0.843344664 | 891.175  | 852.2    | 38.975   | 1.045734569 | 0.7319   | -1.084 |
| 98726_at   | 35.9    | 30.3    | 26.2    | 27.3    | 56.1    | 27.5    | 56.4    | 30.6   | 0.205411096 | 29.925   | 42.65    | 12.725   | 0.701641266 | 0.1849   | 1.359  |
| 98727_at   | 28.8    | 24.1    | 31.1    | 58      | 25.8    | 22.5    | 18.9    | 24.6   | 0.198894255 | 35.5     | 22.95    | 12.55    | 1.546840959 | 0.1081   | -1.468 |
| 98728_at   | 16.6    | 37.5    | 24.2    | 19.9    | 91.1    | 63.3    | 17.6    | 30.9   | 0.212531184 | 24.55    | 50.725   | 26.175   | 0.483982257 | 0.1999   | 1.798  |
| 98729_at   | 17.9    | 18.8    | 17.1    | 18.7    | 25.5    | 25.7    | 22.5    | 21.8   | 0.006435245 | 18.125   | 23.875   | 5.75     | 0.759162304 | 0.001197 | 1.315  |
| 98730_at   | 13.3    | 8.7     | 11.9    | 11.4    | 45.8    | 11.5    | 10.8    | 14.2   | 0.354030986 | 11.325   | 20.575   | 9.25     | 0.550425273 | 0.2856   | 1.507  |
| 98731_at   | 155.3   | 108.4   | 178.3   | 177.5   | 134.3   | 203.2   | 77.3    | 102.6  | 0.458976263 | 154.875  | 129.35   | 25.525   | 1.197332818 | 0.3773   | -1.253 |
| 98732_at   | 25.4    | 44.5    | 32.3    | 48.1    | 47.4    | 48.8    | 61.2    | 41.1   | 0.127042921 | 37.575   | 49.625   | 12.05    | 0.757178841 | 0.1277   | 1.35   |
| 98756_at   | 46.7    | 61.9    | 63.5    | 86.6    | 63      | 53.8    | 59.9    | 112.5  | 0.650797618 | 64.675   | 72.3     | 7.625    | 0.894536653 | 0.6803   | -1.094 |
| 98758_at   | 55.3    | 10.3    | 11.3    | 8.9     | 6.1     | 8.8     | 12.5    | 12.2   | 0.383079688 | 21.45    | 9.9      | 11.55    | 2.166666667 | 0.3296   | -1.629 |
| 98759_f_at | 16428.8 | 17513.1 | 18086.8 | 14526.7 | 27255.3 | 14160.3 | 20007.2 | 16569  | 0.396257938 | 16638.85 | 19497.95 | 2859.1   | 0.853364072 | 0.411    | 1.141  |
| 98760_at   | 15.8    | 8.2     | 13.8    | 9.8     | 16.3    | 9.3     | 14.7    | 6.5    | 0.947132983 | 11.9     | 11.7     | 0.2      | 1.017094017 | 0.8582   | -1.05  |
| 98761_i_at | 1681.3  | 1236.5  | 1458.9  | 1428.1  | 1360.9  | 1390.9  | 1308.4  | 1129   | 0.213427955 | 1451.2   | 1297.3   | 153.9    | 1.118631003 | 0.2126   | -1.116 |
| 98762_f_at | 278.6   | 240.2   | 247     | 264.3   | 261.2   | 254.7   | 211.4   | 172.2  | 0.219832972 | 257.525  | 224.875  | 32.65    | 1.145191773 | 0.1993   | -1.159 |
| 98763_at   | 7       | 2.3     | 1.9     | 3.4     | 8.3     | 1.9     | 6.7     | 6.6    | 0.264882521 | 3.65     | 5.875    | 2.225    | 0.621276596 | 0.3172   | 1.614  |
| 98764_at   | 8.6     | 3.9     | 7.5     | 0.5     | 1.9     | 2.2     | 8.8     | 6.3    | 0.90020929  | 5.125    | 4.8      | 0.325    | 1.067708333 | 0.8349   | 1.183  |
| 98765_f_at | 197.5   | 196.7   | 289.5   | 319.7   | 235.2   | 226.5   | 314.5   | 284.2  | 0.721552851 | 250.85   | 265.1    | 14.25    | 0.946246699 | 0.6547   | -1.073 |
| 98766_at   | 253.2   | 348.3   | 356.5   | 327.3   | 123.8   | 310     | 182.5   | 186.8  | 0.046755849 | 321.325  | 200.775  | 120.55   | 1.600423359 | 0.04487  | -1.675 |
| 98767_at   | 351.5   | 395     | 315.7   | 466.3   | 279.9   | 344.4   | 322.3   | 397.5  | 0.302664099 | 382.125  | 336.025  | 46.1     | 1.137192173 | 0.2991   | -1.134 |
| 98768_at   | 39.7    | 55.3    | 45.6    | 67.9    | 18.8    | 43.2    | 42.5    | 38.7   | 0.101182045 | 52.125   | 35.8     | 16.325   | 1.456005587 | 0.1282   | -1.503 |
| 98770_at   | 487.6   | 429.7   | 423.4   | 469.2   | 556.6   | 278     | 383     | 524.1  | 0.812436765 | 452.475  | 435.425  | 17.05    | 1.039157145 | 0.6702   | -1.076 |
| 98771_at   | 136.4   | 153.2   | 125.9   | 138.2   | 162.6   | 173.1   | 144.3   | 109.7  | 0.5813096   | 138.425  | 147.425  | 9        | 0.938952009 | 0.6564   | -1.052 |
| 98772_at   | 11.4    | 33.7    | 25      | 28.4    | 6.9     | 39.9    | 7.2     | 35.6   | 0.835065848 | 24.625   | 22.4     | 2.225    | 1.099330357 | 0.5521   | -1.405 |
| 98773_s_at | 17.1    | 30.9    | 35.4    | 11.6    | 46.4    | 42.4    | 45.9    | 49.5   | 0.024830559 | 23.75    | 46.05    | 22.3     | 0.515743757 | 0.02773  | 2.129  |
| 98774_at   | 10.2    | 4.3     | 6       | 3.8     | 3.9     | 3.1     | 6       | 4.5    | 0.341312985 | 6.075    | 4.375    | 1.7      | 1.388571429 | 0.3368   | -1.315 |
| 98775_at   | 330.4   | 275.3   | 303.8   | 307.2   | 208.8   | 378.8   | 273.9   | 222.8  | 0.462082384 | 304.175  | 271.075  | 33.1     | 1.122106428 | 0.3495   | -1.152 |



|            |       |       |       |       |       |       |       |       |             |         |         |         |             |          |        |
|------------|-------|-------|-------|-------|-------|-------|-------|-------|-------------|---------|---------|---------|-------------|----------|--------|
| 98776_at   | 4.4   | 2     | 17.1  | 4.9   | 7.4   | 4.4   | 17    | 14.7  | 0.43535227  | 7.1     | 10.875  | 3.775   | 0.652873563 | 0.3089   | 1.839  |
| 98777_at   | 86.6  | 38.5  | 58.2  | 96.4  | 102   | 33    | 39    | 31.3  | 0.422630301 | 69.925  | 51.325  | 18.6    | 1.362396493 | 0.3174   | -1.459 |
| 98778_at   | 248   | 277.5 | 298.3 | 299.5 | 200.5 | 248.6 | 271.3 | 318.8 | 0.482056479 | 280.825 | 259.8   | 21.025  | 1.080927637 | 0.4355   | -1.093 |
| 98779_at   | 21.4  | 15.7  | 17.3  | 25.9  | 20.8  | 16.7  | 40.2  | 67.2  | 0.256808264 | 20.075  | 36.225  | 16.15   | 0.554175293 | 0.2225   | 1.581  |
| 98780_at   | 68.4  | 41    | 85    | 47.4  | 79.9  | 48    | 74.1  | 96    | 0.359610504 | 60.45   | 74.5    | 14.05   | 0.811409396 | 0.3597   | 1.246  |
| 98781_at   | 3.7   | 3.5   | 3.9   | 1.6   | 3.3   | 2.9   | 1.8   | 1.2   | 0.269808871 | 3.175   | 2.3     | 0.875   | 1.380434783 | 0.3229   | -1.402 |
| 98782_at   | 167.7 | 162.8 | 191.8 | 156.2 | 180   | 184.1 | 112   | 118.1 | 0.371045589 | 169.625 | 148.55  | 21.075  | 1.141871424 | 0.3089   | -1.169 |
| 98783_at   | 622.3 | 527.6 | 393.6 | 588.7 | 329   | 522.8 | 245.7 | 634.4 | 0.374147125 | 533.05  | 432.975 | 100.075 | 1.231133437 | 0.3169   | -1.298 |
| 98784_at   | 486.8 | 408.7 | 588.7 | 516.2 | 812.7 | 574.2 | 591   | 507   | 0.175736208 | 500.1   | 621.225 | 121.125 | 0.805022335 | 0.1469   | 1.233  |
| 98785_at   | 6.6   | 7.5   | 8.3   | 11.8  | 8.5   | 13.7  | 10.2  | 4.3   | 0.793554426 | 8.55    | 9.175   | 0.625   | 0.931880109 | 0.9694   | -1.011 |
| 98786_at   | 26.5  | 20.8  | 28.8  | 27.4  | 31.6  | 32.3  | 18.8  | 69.8  | 0.348441848 | 25.875  | 38.125  | 12.25   | 0.678688525 | 0.3557   | 1.323  |
| 98787_at   | 30.3  | 33.7  | 39.1  | 55    | 56.9  | 46.9  | 56.8  | 58.6  | 0.06100665  | 39.525  | 54.8    | 15.275  | 0.721259124 | 0.04649  | 1.417  |
| 98788_at   | 5.5   | 20.2  | 2.3   | 12    | 30.3  | 4     | 20.7  | 15.5  | 0.306259412 | 10      | 17.625  | 7.625   | 0.567375887 | 0.3645   | 1.886  |
| 98789_at   | 81.9  | 80.3  | 113.9 | 87.5  | 115.4 | 108.4 | 65.9  | 129.7 | 0.419370211 | 90.9    | 104.85  | 13.95   | 0.86695279  | 0.4966   | 1.131  |
| 98790_s_at | 141.3 | 123   | 130.6 | 192.7 | 181   | 176.2 | 154.1 | 154.8 | 0.315956397 | 146.9   | 166.525 | 19.625  | 0.882149827 | 0.2493   | 1.148  |
| 98791_at   | 20.3  | 26.7  | 21.9  | 38.4  | 37.8  | 42.3  | 24.9  | 29.7  | 0.272115348 | 26.825  | 33.675  | 6.85    | 0.796585004 | 0.247    | 1.269  |
| 98792_at   | 10.8  | 7.2   | 51.1  | 19.2  | 14.6  | 6.5   | 14.9  | 11    | 0.380580297 | 22.075  | 11.75   | 10.325  | 1.878723404 | 0.427    | -1.487 |
| 98793_at   | 43.5  | 44.4  | 10.5  | 28.5  | 56.6  | 33    | 32.5  | 42.8  | 0.37181799  | 31.725  | 41.225  | 9.5     | 0.769557307 | 0.3393   | 1.456  |
| 98794_at   | 9.3   | 20.6  | 6.9   | 18.8  | 26    | 45.8  | 14    | 27.6  | 0.114255318 | 13.9    | 28.35   | 14.45   | 0.490299824 | 0.09002  | 2.069  |
| 98795_at   | 36.5  | 73.7  | 88.6  | 90.4  | 37.2  | 49.8  | 34.8  | 77.6  | 0.21031878  | 72.3    | 49.85   | 22.45   | 1.450351053 | 0.2416   | -1.44  |
| 98796_at   | 9.7   | 9.3   | 17.1  | 7.3   | 11.5  | 36.1  | 12    | 8.3   | 0.421586895 | 10.85   | 16.975  | 6.125   | 0.639175258 | 0.4114   | 1.384  |
| 98797_at   | 40.4  | 47.2  | 19.9  | 48    | 50    | 52.6  | 22.8  | 24    | 0.888401527 | 38.875  | 37.35   | 1.525   | 1.040829987 | 0.855    | -1.06  |
| 98798_at   | 92.3  | 37.4  | 92.7  | 62.4  | 54    | 33.5  | 26.5  | 72.5  | 0.198986853 | 71.2    | 46.625  | 24.575  | 1.527077748 | 0.2119   | -1.548 |
| 98799_g_at | 12.2  | 10.6  | 22.1  | 12.5  | 8.5   | 17.4  | 16.3  | 14.1  | 0.936143027 | 14.35   | 14.075  | 0.275   | 1.019538188 | 0.9559   | -1.013 |
| 98800_at   | 106.3 | 136.2 | 125.5 | 157.8 | 120.4 | 134.8 | 151.3 | 122.7 | 0.949787542 | 131.45  | 132.3   | 0.85    | 0.993575208 | 0.9048   | -1.012 |
| 98801_at   | 13    | 6.2   | 3.2   | 5.5   | 11.7  | 3.7   | 3.2   | 22.9  | 0.537227574 | 6.975   | 10.375  | 3.4     | 0.672289157 | 0.731    | 1.221  |
| 98802_at   | 4.1   | 5.7   | 2.9   | 13.2  | 10.1  | 1.7   | 2.2   | 5.4   | 0.609861519 | 6.475   | 4.85    | 1.625   | 1.335051546 | 0.5142   | -1.436 |
| 98803_at   | 40    | 42.4  | 52.5  | 56.9  | 42.6  | 49.3  | 35.5  | 37.4  | 0.235079612 | 47.95   | 41.2    | 6.75    | 1.163834951 | 0.2286   | -1.162 |
| 98804_at   | 5.2   | 25.4  | 20.9  | 6     | 58.7  | 12.5  | 21.1  | 14.5  | 0.3582678   | 14.375  | 26.7    | 12.325  | 0.538389513 | 0.2718   | 1.925  |
| 98805_at   | 5.5   | 4.3   | 9     | 8.4   | 8     | 7.6   | 8.5   | 11.9  | 0.193462862 | 6.8     | 9       | 2.2     | 0.755555556 | 0.1797   | 1.363  |
| 98806_s_at | 100.9 | 113.5 | 99.7  | 116.1 | 134.7 | 116.8 | 35.3  | 144.6 | 0.991216047 | 107.55  | 107.85  | 0.3     | 0.997218359 | 0.7212   | -1.133 |
| 98807_at   | 194.4 | 162.4 | 237.5 | 254   | 200.7 | 226.5 | 227   | 243.5 | 0.613252087 | 212.075 | 224.425 | 12.35   | 0.94497048  | 0.5485   | -1.072 |
| 98808_at   | 38.6  | 55.2  | 60    | 86.3  | 69.5  | 57    | 53.8  | 77.6  | 0.711596148 | 60.025  | 64.475  | 4.45    | 0.930981    | 0.6039   | 1.107  |
| 98809_s_at | 57.5  | 45.1  | 89.9  | 50.4  | 22    | 50.6  | 4.8   | 67    | 0.207324262 | 60.725  | 36.1    | 24.625  | 1.682132964 | 0.2032   | -2.395 |
| 98810_at   | 66.2  | 69.6  | 91.6  | 73.7  | 22.7  | 63.2  | 77.4  | 69.4  | 0.268169936 | 75.275  | 58.175  | 17.1    | 1.293940696 | 0.2788   | -1.416 |
| 98811_at   | 53.8  | 15.6  | 38.8  | 31.4  | 65.6  | 36.2  | 14    | 66.2  | 0.508631432 | 34.9    | 45.5    | 10.6    | 0.767032967 | 0.6849   | 1.211  |
| 98812_at   | 3     | 4.3   | 7.1   | 5.6   | 3.8   | 2.2   | 4.4   | 2.3   | 0.13795043  | 5       | 3.175   | 1.825   | 1.57480315  | 0.1359   | -1.555 |
| 98813_at   | 2.3   | 5.8   | 1.8   | 2.9   | 4.1   | 4.3   | 5.1   | 4.6   | 0.236794982 | 3.2     | 4.525   | 1.325   | 0.70718232  | 0.1418   | 1.552  |
| 98814_at   | 20    | 5.5   | 23.7  | 15.1  | 3.7   | 4.5   | 1.8   | 19.6  | 0.178335198 | 16.075  | 7.4     | 8.675   | 2.172297297 | 0.1289   | -2.877 |
| 98815_at   | 6.2   | 9.3   | 10.5  | 7.9   | 10.9  | 6.7   | 7.2   | 10.1  | 0.863700509 | 8.475   | 8.725   | 0.25    | 0.971346705 | 0.8702   | -1.029 |
| 98816_s_at | 18.2  | 48.5  | 21.5  | 24.7  | 15.3  | 14.4  | 14.2  | 31.5  | 0.298510319 | 28.225  | 18.85   | 9.375   | 1.49734748  | 0.2268   | -1.476 |
| 98817_at   | 61.7  | 56.9  | 76    | 65.2  | 82    | 57.9  | 46.7  | 7.2   | 0.373105564 | 64.95   | 48.45   | 16.5    | 1.340557276 | 0.3173   | -1.816 |
| 98818_at   | 89.6  | 78.8  | 89    | 98.5  | 50.6  | 130   | 48.6  | 89.3  | 0.664176284 | 88.975  | 79.625  | 9.35    | 1.117425432 | 0.4528   | -1.214 |
| 98819_at   | 8.1   | 6.9   | 9     | 15.6  | 26    | 13    | 8.3   | 33.4  | 0.173853854 | 9.9     | 20.175  | 10.275  | 0.49070632  | 0.14     | 1.858  |
| 98820_g_at | 8     | 8.8   | 7.3   | 1.9   | 15.3  | 3.2   | 2.6   | 6.3   | 0.920548992 | 6.5     | 6.85    | 0.35    | 0.948905109 | 0.9219   | -1.057 |
| 98821_at   | 7     | 10.2  | 5.3   | 36.9  | 8     | 8     | 3.9   | 6.4   | 0.347091875 | 14.85   | 6.575   | 8.275   | 2.258555133 | 0.2849   | -1.718 |
| 98822_at   | 135.8 | 101.6 | 121.9 | 128.8 | 159.2 | 202.9 | 170.1 | 216   | 0.009396119 | 122.025 | 187.05  | 65.025  | 0.652365678 | 0.004368 | 1.53   |
| 98823_at   | 3.3   | 3.2   | 5     | 25.8  | 4.8   | 4.7   | 3.9   | 5.9   | 0.474231989 | 9.325   | 4.825   | 4.5     | 1.932642487 | 0.6366   | -1.281 |
| 98824_at   | 5.9   | 38.6  | 15.7  | 34.1  | 37.7  | 28.7  | 5.2   | 11.9  | 0.809724904 | 23.575  | 20.875  | 2.7     | 1.129341317 | 0.8167   | -1.163 |
| 98825_at   | 282.5 | 249.9 | 268.6 | 330.6 | 233.3 | 188.8 | 155.8 | 194.4 | 0.008758638 | 282.9   | 193.075 | 89.825  | 1.465233717 | 0.008943 | -1.472 |
| 98826_at   | 303.7 | 263.5 | 252.4 | 304.9 | 287.2 | 228.3 | 267.1 | 333.7 | 0.939727319 | 281.125 | 279.075 | 2.05    | 1.007345696 | 0.8921   | -1.013 |
| 98827_i_at | 11.7  | 3.3   | 1.2   | 5.4   | 4.1   | 4.6   | 2     | 4.2   | 0.520605677 | 5.4     | 3.725   | 1.675   | 1.44966443  | 0.8284   | -1.124 |
| 98828_at   | 6.4   | 11.7  | 14.3  | 16.3  | 9.2   | 11.2  | 12.2  | 12.3  | 0.697728775 | 12.175  | 11.225  | 0.95    | 1.084632517 | 0.8954   | -1.03  |
| 98829_at   | 10    | 9.6   | 3.6   | 16.9  | 6.5   | 6.6   | 5.2   | 6.6   | 0.257039702 | 10.025  | 6.225   | 3.8     | 1.610441767 | 0.3337   | -1.412 |
| 98830_at   | 8.2   | 6     | 30.8  | 30.9  | 47.3  | 23.9  | 22.3  | 12.3  | 0.487506916 | 18.975  | 26.45   | 7.475   | 0.717391304 | 0.3927   | 1.604  |
| 98831_at   | 136.9 | 142.6 | 147.2 | 94.1  | 184   | 125.7 | 117   | 159.2 | 0.442147606 | 130.2   | 146.475 | 16.275  | 0.888888889 | 0.46     | 1.124  |



|            |        |        |        |        |        |        |        |        |             |          |         |         |             |         |        |
|------------|--------|--------|--------|--------|--------|--------|--------|--------|-------------|----------|---------|---------|-------------|---------|--------|
| 98832_at   | 47.9   | 39.1   | 9.7    | 58.6   | 9.5    | 59.3   | 62.6   | 45.7   | 0.746127541 | 38.825   | 44.275  | 5.45    | 0.876905703 | 0.8718  | -1.107 |
| 98833_at   | 4.7    | 17.9   | 6.3    | 4.4    | 29     | 14.9   | 6.9    | 4.1    | 0.441760829 | 8.325    | 13.725  | 5.4     | 0.606557377 | 0.4678  | 1.519  |
| 98834_at   | 58     | 60.3   | 24.3   | 47.8   | 80.3   | 59.3   | 56.4   | 40.6   | 0.35738735  | 47.6     | 59.15   | 11.55   | 0.804733728 | 0.367   | 1.28   |
| 98835_at   | 110.2  | 92.7   | 94.7   | 123.6  | 54.9   | 131.1  | 132.5  | 141.3  | 0.676885889 | 105.3    | 114.95  | 9.65    | 0.916050457 | 0.9035  | -1.03  |
| 98836_at   | 8      | 11.2   | 11.3   | 9.7    | 11.9   | 10.3   | 9.3    | 14.7   | 0.33462037  | 10.05    | 11.55   | 1.5     | 0.87012987  | 0.3466  | 1.14   |
| 98837_at   | 54.6   | 42.8   | 31.9   | 66.1   | 54.9   | 64.5   | 58.2   | 73.4   | 0.164335393 | 48.85    | 62.75   | 13.9    | 0.778486056 | 0.1509  | 1.323  |
| 98838_at   | 10     | 9.9    | 2.8    | 8.9    | 1.8    | 14.3   | 2.7    | 6.2    | 0.641007593 | 7.9      | 6.25    | 1.65    | 1.264       | 0.4644  | -1.548 |
| 98839_at   | 88     | 56.9   | 181.4  | 93.7   | 134.5  | 111.1  | 128.3  | 291.2  | 0.271692534 | 105      | 166.275 | 61.275  | 0.631483987 | 0.1953  | 1.601  |
| 98840_at   | 46.2   | 37     | 47.3   | 36.8   | 33.4   | 11.8   | 32.1   | 49.2   | 0.283485551 | 41.825   | 31.625  | 10.2    | 1.322529644 | 0.2573  | -1.479 |
| 98841_at   | 80.8   | 73.1   | 56.1   | 114.9  | 85.4   | 92.2   | 74     | 57.9   | 0.800679118 | 81.225   | 77.375  | 3.85    | 1.049757674 | 0.8726  | -1.031 |
| 98842_at   | 41.1   | 43.2   | 36.9   | 13.6   | 78.5   | 54.1   | 76.7   | 30.5   | 0.103800769 | 33.7     | 59.95   | 26.25   | 0.562135113 | 0.1367  | 1.827  |
| 98843_at   | 3.7    | 15.7   | 7      | 2.5    | 35.8   | 5      | 8.2    | 4.4    | 0.492375419 | 7.225    | 13.35   | 6.125   | 0.541198502 | 0.4837  | 1.598  |
| 98844_at   | 94.4   | 96.6   | 122.8  | 110.2  | 151.4  | 166.9  | 40.2   | 187.6  | 0.426152819 | 106      | 136.525 | 30.525  | 0.776414576 | 0.7759  | -1.115 |
| 98845_at   | 7      | 21.3   | 30.9   | 19.1   | 45.7   | 8.3    | 38.2   | 8.6    | 0.632221383 | 19.575   | 25.2    | 5.625   | 0.776785714 | 0.8782  | -1.094 |
| 98846_f_at | 164    | 253.7  | 251    | 189.4  | 223.4  | 184.6  | 232.2  | 197.7  | 0.849134077 | 214.525  | 209.475 | 5.05    | 1.024107889 | 0.9308  | -1.011 |
| 98847_at   | 50.5   | 24.9   | 75     | 108.6  | 89.1   | 110.9  | 98.5   | 82.2   | 0.187925423 | 64.75    | 95.175  | 30.425  | 0.680325716 | 0.1612  | 1.672  |
| 98848_at   | 153.2  | 179.3  | 126.9  | 187.2  | 47.8   | 216.2  | 178.6  | 187.2  | 0.921394697 | 161.65   | 157.45  | 4.2     | 1.026675135 | 0.6763  | -1.172 |
| 98849_at   | 81.5   | 118.7  | 65     | 124.9  | 131    | 81.9   | 102.9  | 102.3  | 0.706769366 | 97.525   | 104.525 | 7       | 0.933030376 | 0.6387  | -1.095 |
| 98850_at   | 43.9   | 44.3   | 27.5   | 34.6   | 47.7   | 61.5   | 75.1   | 53.1   | 0.027456917 | 37.575   | 59.35   | 21.775  | 0.633108677 | 0.02203 | 1.585  |
| 98851_at   | 62.2   | 91.1   | 32.9   | 100.7  | 133.9  | 75     | 104    | 112.8  | 0.129227329 | 71.725   | 106.425 | 34.7    | 0.67394879  | 0.1535  | 1.584  |
| 98852_at   | 89.6   | 91.8   | 78     | 115.2  | 96.7   | 106.3  | 76     | 124.9  | 0.589823396 | 93.65    | 100.975 | 7.325   | 0.927457291 | 0.6188  | -1.071 |
| 98853_at   | 22.4   | 24.3   | 30.5   | 30.9   | 79     | 56.2   | 61.6   | 46.8   | 0.011384208 | 27.025   | 60.9    | 33.875  | 0.443760263 | 0.00104 | 2.232  |
| 98854_at   | 10.1   | 47.9   | 43     | 39.8   | 21.5   | 30.9   | 40.2   | 35.6   | 0.753928412 | 35.2     | 32.05   | 3.15    | 1.098283931 | 0.9331  | -1.035 |
| 98855_r_at | 166.8  | 138    | 138.8  | 185.3  | 167.7  | 178.7  | 116.8  | 225.8  | 0.579185014 | 157.225  | 172.25  | 15.025  | 0.912772134 | 0.6568  | -1.075 |
| 98856_at   | 13.4   | 30.2   | 20.2   | 7.6    | 6.2    | 10.3   | 9.5    | 4.4    | 0.122528583 | 17.85    | 7.6     | 10.25   | 2.348684211 | 0.06741 | -2.202 |
| 98857_at   | 4.4    | 23     | 6.1    | 2.8    | 2.6    | 6.7    | 5.2    | 8.3    | 0.530670284 | 9.075    | 5.7     | 3.375   | 1.592105263 | 0.7074  | -1.227 |
| 98858_at   | 47.4   | 27.9   | 87.4   | 27.6   | 30.7   | 36.1   | 53.4   | 17.7   | 0.450714824 | 47.575   | 34.475  | 13.1    | 1.379985497 | 0.4638  | -1.322 |
| 98859_at   | 104.6  | 82.4   | 141.2  | 100    | 162.5  | 172    | 174.7  | 113.9  | 0.041981717 | 107.05   | 155.775 | 48.725  | 0.687209116 | 0.04485 | 1.462  |
| 98860_at   | 11.5   | 15     | 11.8   | 13.2   | 30.2   | 81.1   | 25.7   | 15.4   | 0.183822511 | 12.875   | 38.1    | 25.225  | 0.337926509 | 0.04477 | 2.444  |
| 98861_at   | 43.8   | 100.1  | 57.5   | 185.3  | 66.3   | 51.8   | 105.2  | 185.2  | 0.904854645 | 96.675   | 102.125 | 5.45    | 0.946634027 | 0.8387  | -1.095 |
| 98862_at   | 61.3   | 67     | 96.2   | 64.7   | 69.2   | 75.9   | 88.5   | 85.2   | 0.45926967  | 72.3     | 79.7    | 7.4     | 0.907151819 | 0.384   | 1.116  |
| 98863_at   | 35.9   | 27.4   | 4.7    | 13.8   | 19     | 44.2   | 42     | 54.6   | 0.10547073  | 20.45    | 39.95   | 19.5    | 0.511889862 | 0.1454  | 2.347  |
| 98864_s_at | 68.3   | 12     | 57.2   | 54.7   | 52.3   | 60.1   | 68.2   | 62.1   | 0.388586364 | 48.05    | 60.675  | 12.625  | 0.791924186 | 0.3522  | 1.51   |
| 98865_at   | 162.3  | 102.2  | 94.2   | 96.8   | 68.8   | 147.2  | 101.2  | 149.2  | 0.917845971 | 113.875  | 116.6   | 2.725   | 0.976629503 | 0.9904  | -1.003 |
| 98866_at   | 40.3   | 6.8    | 9.7    | 7.4    | 16.3   | 10.5   | 6.8    | 11.3   | 0.599545925 | 16.05    | 11.225  | 4.825   | 1.429844098 | 0.8288  | -1.108 |
| 98867_at   | 65.3   | 66.4   | 83.8   | 74.2   | 61     | 70.7   | 57.6   | 70.2   | 0.214594945 | 72.425   | 64.875  | 7.55    | 1.116377649 | 0.2112  | -1.115 |
| 98868_at   | 38     | 50.8   | 50.6   | 53     | 49.5   | 43.5   | 34.9   | 62.9   | 0.955475413 | 48.1     | 47.7    | 0.4     | 1.008385744 | 0.8802  | -1.023 |
| 98869_g_at | 121.4  | 247    | 201.3  | 206.6  | 295.9  | 227.5  | 251.8  | 242.5  | 0.104962475 | 194.075  | 254.425 | 60.35   | 0.762798467 | 0.1163  | 1.348  |
| 98870_at   | 241.7  | 281.8  | 356.7  | 300.6  | 387    | 310.3  | 338.7  | 238.6  | 0.572590102 | 295.2    | 318.65  | 23.45   | 0.926408285 | 0.6045  | -1.074 |
| 98871_at   | 9.2    | 8.5    | 8.9    | 24.8   | 27.1   | 10.1   | 23.5   | 37.8   | 0.147889167 | 12.85    | 24.625  | 11.775  | 0.521827411 | 0.1319  | 1.942  |
| 98872_at   | 31.7   | 7      | 26.7   | 23     | 7      | 36     | 19     | 31.6   | 0.88294774  | 22.1     | 23.4    | 1.3     | 0.944444444 | 0.9609  | -1.026 |
| 98873_at   | 101.7  | 115.2  | 176.2  | 37.1   | 59     | 105.2  | 151.5  | 138.8  | 0.869288061 | 107.55   | 113.625 | 6.075   | 0.946534653 | 0.7462  | 1.142  |
| 98874_at   | 66.2   | 42.3   | 68     | 95.6   | 32.4   | 110.1  | 20.5   | 97.6   | 0.913963645 | 68.025   | 65.15   | 2.875   | 1.044128933 | 0.618   | -1.264 |
| 98875_at   | 330.7  | 416.8  | 306    | 379.4  | 502.9  | 409.9  | 446.1  | 425.9  | 0.034762604 | 358.225  | 446.2   | 87.975  | 0.802835052 | 0.03435 | 1.251  |
| 98876_at   | 775.4  | 634.5  | 546.2  | 542.4  | 535.1  | 638.6  | 665.6  | 451    | 0.506025717 | 624.625  | 572.575 | 52.05   | 1.090905122 | 0.5004  | -1.092 |
| 98878_r_at | 221.3  | 211.8  | 258.8  | 244.4  | 239.1  | 267.2  | 221.8  | 246.4  | 0.528157714 | 234.075  | 243.625 | 9.55    | 0.96080041  | 0.5214  | -1.042 |
| 98880_at   | 1053   | 935.6  | 948.1  | 1001.4 | 878.6  | 1037.3 | 897.6  | 984.8  | 0.478706149 | 984.525  | 949.575 | 34.95   | 1.036805939 | 0.462   | -1.038 |
| 98881_at   | 999.2  | 753.7  | 892.1  | 806.6  | 591    | 696.8  | 609.1  | 457.2  | 0.009518526 | 862.9    | 588.525 | 274.375 | 1.466207893 | 0.01114 | -1.474 |
| 98882_s_at | 1226.1 | 1196.9 | 1338.4 | 1181.7 | 1285.8 | 1326.3 | 1385.1 | 1307.6 | 0.08126018  | 1235.775 | 1326.2  | 90.425  | 0.931816468 | 0.06887 | -1.074 |
| 98883_r_at | 47.2   | 41.1   | 57.8   | 13.3   | 53.4   | 9.3    | 25.8   | 36.6   | 0.54210851  | 39.85    | 31.275  | 8.575   | 1.274180655 | 0.5814  | -1.338 |
| 98884_r_at | 262.7  | 266.6  | 279.1  | 540.9  | 313.8  | 345.9  | 480.1  | 454.1  | 0.475181544 | 337.325  | 398.475 | 61.15   | 0.846539933 | 0.3596  | 1.223  |
| 98886_at   | 925.5  | 896.2  | 1026.5 | 787.3  | 1480.3 | 869.3  | 1109.2 | 890.2  | 0.305109025 | 908.875  | 1087.25 | 178.375 | 0.835939296 | 0.2816  | 1.173  |
| 98887_at   | 1661.2 | 1813.5 | 1719.4 | 1556.1 | 1611.5 | 1287.5 | 2439.8 | 1823.2 | 0.70446245  | 1687.55  | 1790.5  | 102.95  | 0.942502094 | 0.8133  | -1.034 |
| 98889_at   | 141.2  | 161.2  | 98.8   | 243.2  | 206.5  | 110.7  | 175.9  | 201.5  | 0.750066904 | 161.1    | 173.65  | 12.55   | 0.927728189 | 0.6918  | -1.103 |
| 98890_at   | 114    | 328.8  | 192.5  | 289    | 268.8  | 223.6  | 314.5  | 333    | 0.371355058 | 231.075  | 284.975 | 53.9    | 0.810860602 | 0.3199  | 1.318  |
| 98891_at   | 332.7  | 194.1  | 225.1  | 227.7  | 113    | 217.6  | 156.5  | 185.5  | 0.091038968 | 244.9    | 168.15  | 76.75   | 1.456437704 | 0.07874 | -1.468 |



|            |        |        |        |        |        |        |        |        |             |          |          |         |             |          |        |
|------------|--------|--------|--------|--------|--------|--------|--------|--------|-------------|----------|----------|---------|-------------|----------|--------|
| 98892_at   | 240.8  | 268.3  | 168.7  | 197.3  | 287.4  | 296.9  | 240    | 256.1  | 0.105044691 | 218.775  | 270.1    | 51.325  | 0.809977786 | 0.09973  | 1.25   |
| 98893_at   | 477.6  | 461.9  | 426    | 559    | 478.6  | 507.6  | 465    | 658.5  | 0.419477232 | 481.125  | 527.425  | 46.3    | 0.912215007 | 0.4077   | -1.091 |
| 98894_at   | 597.1  | 742.8  | 656    | 627.1  | 595.7  | 567.8  | 537.1  | 720.9  | 0.364586162 | 655.75   | 605.375  | 50.375  | 1.083212885 | 0.3356   | -1.086 |
| 98896_at   | 867.6  | 713.2  | 916.4  | 899.2  | 822.9  | 849.9  | 679.8  | 1029.7 | 0.96867758  | 849.1    | 845.575  | 3.525   | 1.004168761 | 0.9244   | -1.01  |
| 98901_at   | 1927.6 | 1361.7 | 1745.2 | 1524.4 | 2043.5 | 1619.2 | 1692.8 | 1299.8 | 0.906629175 | 1639.725 | 1663.825 | 24.1    | 0.985515304 | 0.9339   | -1.01  |
| 98902_at   | 2.4    | 10.2   | 9.7    | 13.1   | 24.9   | 6.2    | 7.9    | 8.4    | 0.572328216 | 8.85     | 11.85    | 3       | 0.746835443 | 0.5715   | 1.343  |
| 98903_at   | 19.9   | 35.1   | 34.3   | 27.3   | 11     | 30.7   | 64.6   | 30.2   | 0.694742568 | 29.15    | 34.125   | 4.975   | 0.854212454 | 0.9951   | -1.003 |
| 98904_at   | 1572.4 | 1058.8 | 1036.7 | 1236.1 | 1104   | 1155   | 1182.4 | 1259.1 | 0.714530384 | 1226     | 1175.125 | 50.875  | 1.043293267 | 0.7797   | -1.03  |
| 98905_at   | 7352.6 | 5993   | 7670.8 | 6766   | 6257.5 | 5958.9 | 6735.8 | 6257.3 | 0.183275047 | 6945.6   | 6302.375 | 643.225 | 1.102060731 | 0.1687   | -1.098 |
| 98906_at   | 532.4  | 620.6  | 622.9  | 656.5  | 570.6  | 531    | 612.7  | 705.8  | 0.949042949 | 608.1    | 605.025  | 3.075   | 1.005082435 | 0.9224   | -1.008 |
| 98908_at   | 1284.3 | 1900.2 | 1537.9 | 1809.3 | 1338.4 | 1559.7 | 1473.2 | 1664.4 | 0.466190025 | 1632.925 | 1508.925 | 124     | 1.082177709 | 0.506    | -1.073 |
| 98909_at   | 962.1  | 964.3  | 877.1  | 809.3  | 987.4  | 1082.4 | 874    | 920.2  | 0.32682632  | 903.2    | 966      | 62.8    | 0.934989648 | 0.3277   | -1.069 |
| 98910_at   | 921.5  | 1017.9 | 1110.7 | 821.5  | 1485.4 | 933    | 1069   | 946    | 0.379471522 | 967.9    | 1108.35  | 140.45  | 0.873280101 | 0.3662   | 1.131  |
| 98911_at   | 2175.4 | 2216.4 | 2216.5 | 2127.8 | 1731.5 | 1800.1 | 1787.8 | 2025.3 | 0.008996251 | 2184.025 | 1836.175 | 347.85  | 1.189442727 | 0.00269  | -1.191 |
| 98912_at   | 608.9  | 474.9  | 493    | 589.5  | 486.1  | 553.7  | 516.1  | 591.3  | 0.91096869  | 541.575  | 536.8    | 4.775   | 1.008895306 | 0.9419   | -1.006 |
| 98914_at   | 2113   | 2489.2 | 2434.6 | 2128.8 | 3119.5 | 2159.7 | 2524.7 | 2263.8 | 0.392155756 | 2291.4   | 2516.925 | 225.525 | 0.910396615 | 0.3868   | -1.09  |
| 98915_at   | 846    | 770.9  | 915.3  | 932.7  | 557.9  | 1031   | 801.5  | 907.4  | 0.717199496 | 866.225  | 824.45   | 41.775  | 1.050670144 | 0.6263   | -1.074 |
| 98916_at   | 134.6  | 104.9  | 93.3   | 111.4  | 131.3  | 95.3   | 126.4  | 131.8  | 0.441342491 | 111.05   | 121.2    | 10.15   | 0.916254125 | 0.4536   | -1.091 |
| 98917_at   | 1201   | 951.9  | 1073.2 | 1148.6 | 797    | 1046.8 | 977    | 876.6  | 0.070464629 | 1093.675 | 924.35   | 169.325 | 1.183182777 | 0.07381  | -1.185 |
| 98918_at   | 1695.9 | 2154.5 | 2156.9 | 1665   | 2743.1 | 2770.4 | 2461.2 | 2295.1 | 0.01157433  | 1918.075 | 2567.45  | 649.375 | 0.747073945 | 0.01304  | 1.345  |
| 98919_at   | 7.1    | 7      | 8.9    | 9.6    | 8.7    | 7.2    | 10.2   | 7.1    | 0.883358595 | 8.15     | 8.3      | 0.15    | 0.981927711 | 0.9083   | -1.014 |
| 98920_g_at | 892.3  | 815.6  | 692.7  | 630.9  | 794.7  | 768.8  | 708.5  | 631.2  | 0.66292788  | 757.875  | 725.8    | 32.075  | 1.044192615 | 0.6983   | -1.039 |
| 98921_at   | 860.9  | 986.3  | 868.9  | 762.6  | 785.2  | 840.1  | 835.4  | 930.8  | 0.707050847 | 869.675  | 847.875  | 21.8    | 1.025711337 | 0.7274   | -1.023 |
| 98922_at   | 401.9  | 277.3  | 325.3  | 362.9  | 265    | 383.4  | 364.2  | 346.2  | 0.955810076 | 341.85   | 339.7    | 2.15    | 1.006329114 | 0.9554   | -1.007 |
| 98923_at   | 631.3  | 464.8  | 536.1  | 530.7  | 426.1  | 581.8  | 568.5  | 608    | 0.923063869 | 540.725  | 546.1    | 5.375   | 0.99015748  | 0.9518   | -1.006 |
| 98924_at   | 143.3  | 94.8   | 119.6  | 162.9  | 91.7   | 107.2  | 110.9  | 86.8   | 0.123647956 | 130.15   | 99.15    | 31      | 1.31265759  | 0.09812  | -1.294 |
| 98925_at   | 11.8   | 62.2   | 22.9   | 46.1   | 15.6   | 52.7   | 24.5   | 60.4   | 0.876092309 | 35.75    | 38.3     | 2.55    | 0.933420366 | 0.8252   | -1.12  |
| 98926_at   | 231.5  | 580.3  | 470.8  | 450.9  | 407    | 577.7  | 532.8  | 549.3  | 0.362278864 | 433.375  | 516.7    | 83.325  | 0.838736211 | 0.3431   | 1.246  |
| 98927_at   | 1125.9 | 1684   | 1312.5 | 1649.8 | 1078   | 1467.5 | 1365.3 | 1352.2 | 0.458570065 | 1443.05  | 1315.75  | 127.3   | 1.096750903 | 0.4952   | -1.089 |
| 98928_at   | 1057.6 | 1100.9 | 1270.1 | 1043.2 | 1340.6 | 975.3  | 1111.9 | 1068.9 | 0.949371482 | 1117.95  | 1124.175 | 6.225   | 0.994462606 | 0.9828   | -1.002 |
| 98929_at   | 1019   | 858.3  | 875.4  | 783    | 1011.5 | 866.5  | 839.3  | 865.7  | 0.857426954 | 883.925  | 895.75   | 11.825  | 0.986798772 | 0.8341   | -1.015 |
| 98930_at   | 1851.2 | 1930.5 | 1644.6 | 1561.8 | 2670.5 | 1692.9 | 1912.8 | 1466.6 | 0.534047953 | 1747.025 | 1935.7   | 188.675 | 0.902528801 | 0.5771   | -1.084 |
| 98931_at   | 399.3  | 486.5  | 404.1  | 527.2  | 396.8  | 449.8  | 494.8  | 544.5  | 0.712769747 | 454.275  | 471.475  | 17.2    | 0.963518744 | 0.7114   | -1.038 |
| 98932_at   | 22     | 24.9   | 42.9   | 37.1   | 29.6   | 28.4   | 26.1   | 82.6   | 0.533253192 | 31.725   | 41.675   | 9.95    | 0.76124775  | 0.5814   | 1.201  |
| 98933_at   | 913.3  | 1327.7 | 1092.2 | 1196.6 | 1248.5 | 1120.5 | 1297.6 | 1392.1 | 0.258889398 | 1132.45  | 1264.675 | 132.225 | 0.895447447 | 0.249    | -1.124 |
| 98934_at   | 1503.5 | 1049   | 1310.6 | 1080.4 | 1202.1 | 1127.5 | 1208   | 915.6  | 0.376606878 | 1235.875 | 1113.3   | 122.575 | 1.110100602 | 0.3871   | -1.105 |
| 98936_at   | 641.9  | 365.5  | 509.4  | 427    | 595.1  | 537.4  | 338    | 441    | 0.924946056 | 485.95   | 477.875  | 8.075   | 1.016897724 | 0.9246   | -1.017 |
| 98937_at   | 2469.8 | 2303.9 | 1947   | 2093.6 | 2753.2 | 2156.8 | 2198.5 | 2195.2 | 0.530444511 | 2203.575 | 2325.925 | 122.35  | 0.947397272 | 0.5243   | -1.054 |
| 98938_at   | 1157   | 1430.6 | 1261.7 | 1131.6 | 1555.2 | 978.5  | 1454.5 | 1071.3 | 0.905899419 | 1245.225 | 1264.875 | 19.65   | 0.984464868 | 0.9948   | -1.001 |
| 98940_at   | 7.5    | 6.4    | 6.2    | 12.8   | 6.9    | 15.5   | 9.6    | 6.8    | 0.587215255 | 8.225    | 9.7      | 1.475   | 0.847938144 | 0.5835   | 1.16   |
| 98941_r_at | 28.3   | 12.5   | 27.6   | 23.5   | 59.9   | 24.9   | 35.1   | 8.9    | 0.463618242 | 22.975   | 32.2     | 9.225   | 0.713509317 | 0.7037   | 1.194  |
| 98942_r_at | 181.1  | 156.5  | 120.7  | 313.8  | 73.9   | 230.4  | 119.5  | 123.3  | 0.336623521 | 193.025  | 136.775  | 56.25   | 1.411259368 | 0.283    | -1.438 |
| 98943_at   | 355.8  | 217.9  | 309.3  | 233.4  | 371.8  | 212.6  | 258.9  | 223.9  | 0.809249651 | 279.1    | 266.8    | 12.3    | 1.046101949 | 0.7798   | -1.051 |
| 98944_at   | 1128.7 | 755.2  | 914.4  | 1019.4 | 830.2  | 876.8  | 920.8  | 1023.2 | 0.663331835 | 954.425  | 912.75   | 41.675  | 1.045658724 | 0.7168   | -1.037 |
| 98945_at   | 136.7  | 183.8  | 132.9  | 154.2  | 148.6  | 173.8  | 157.1  | 174.8  | 0.42163708  | 151.9    | 163.575  | 11.675  | 0.928626013 | 0.3763   | -1.083 |
| 98946_at   | 1078.4 | 1338.5 | 1470.7 | 1476.4 | 800.9  | 1421.1 | 1224.1 | 1488.1 | 0.578147743 | 1341     | 1233.55  | 107.45  | 1.087106319 | 0.5402   | -1.109 |
| 98947_at   | 3.7    | 9.6    | 12.5   | 11.4   | 18.8   | 22.3   | 14.4   | 8.1    | 0.127915563 | 9.3      | 15.9     | 6.6     | 0.58490566  | 0.1632   | 1.765  |
| 98948_at   | 749.4  | 574.5  | 560.3  | 769.5  | 701.3  | 693    | 647.1  | 811.2  | 0.482686788 | 663.425  | 713.15   | 49.725  | 0.930274136 | 0.4435   | -1.083 |
| 98950_at   | 999.8  | 1216.4 | 1152.2 | 1254.8 | 902.6  | 1099.3 | 1002.5 | 1369.2 | 0.611945649 | 1155.8   | 1093.4   | 62.4    | 1.057069691 | 0.5541   | -1.066 |
| 98951_at   | 176.6  | 222.2  | 271    | 308    | 201.9  | 261.5  | 219.6  | 312    | 0.91298462  | 244.45   | 248.75   | 4.3     | 0.982713568 | 0.8785   | -1.025 |
| 98952_at   | 139.3  | 336    | 130.2  | 260.5  | 54.2   | 353.6  | 317    | 379.9  | 0.535772158 | 216.5    | 276.175  | 59.675  | 0.783923237 | 0.8637   | -1.098 |
| 98953_at   | 1476.7 | 2168.8 | 2050.8 | 2090.3 | 1980.6 | 1803.5 | 1846.6 | 1906.8 | 0.725617456 | 1946.65  | 1884.375 | 62.275  | 1.033048093 | 0.8186   | -1.022 |
| 98954_f_at | 12.8   | 2      | 8.9    | 13.5   | 6.8    | 4.3    | 8.2    | 4.5    | 0.301338465 | 9.3      | 5.95     | 3.35    | 1.56302521  | 0.5894   | -1.308 |
| 98955_at   | 74.1   | 58.4   | 64.7   | 109.8  | 98.1   | 60.7   | 73.5   | 112.8  | 0.583351775 | 76.75    | 86.275   | 9.525   | 0.889597218 | 0.5686   | -1.126 |
| 98956_at   | 2507   | 2995.3 | 2941.8 | 2403   | 2100.8 | 3576.8 | 2918.1 | 2269.4 | 0.99082386  | 2711.775 | 2716.275 | 4.5     | 0.998343319 | 0.9076   | -1.016 |
| 98957_at   | 836.6  | 766.3  | 675.4  | 791    | 380    | 508.1  | 456.7  | 441.2  | 0.000391828 | 767.325  | 446.5    | 320.825 | 1.718533035 | 0.000355 | -1.723 |



|            |        |        |        |        |        |        |        |        |             |          |          |         |             |          |        |
|------------|--------|--------|--------|--------|--------|--------|--------|--------|-------------|----------|----------|---------|-------------|----------|--------|
| 98958_at   | 247.1  | 191.3  | 230.3  | 232.3  | 192.1  | 334.7  | 124.9  | 256.2  | 0.972389492 | 225.25   | 226.975  | 1.725   | 0.992400044 | 0.8209   | -1.053 |
| 98959_at   | 543.4  | 558.9  | 626.1  | 543.8  | 422.3  | 654.1  | 526.5  | 491.5  | 0.444721871 | 568.05   | 523.6    | 44.45   | 1.084893048 | 0.3776   | -1.097 |
| 98960_s_at | 453.6  | 308.8  | 342.9  | 337    | 247.2  | 318.1  | 319.3  | 273.5  | 0.112722492 | 360.575  | 289.525  | 71.05   | 1.245401951 | 0.0849   | -1.239 |
| 98961_at   | 130.4  | 70.9   | 85.3   | 91.9   | 100.8  | 69.6   | 79.6   | 76.5   | 0.41106123  | 94.625   | 81.625   | 13      | 1.159264931 | 0.4124   | -1.141 |
| 98962_at   | 10.8   | 10.6   | 18.2   | 11.9   | 14.5   | 9.1    | 47.9   | 59.1   | 0.206251186 | 12.875   | 32.65    | 19.775  | 0.394333844 | 0.2005   | 1.97   |
| 98963_at   | 101.2  | 141.3  | 133.8  | 133.8  | 97.4   | 124.6  | 135.2  | 106.9  | 0.388095847 | 127.525  | 116.025  | 11.5    | 1.09911657  | 0.4048   | -1.099 |
| 98965_at   | 295.6  | 278.7  | 308.2  | 296.2  | 358.5  | 301.2  | 282.4  | 420    | 0.236854079 | 294.675  | 340.525  | 45.85   | 0.865354967 | 0.1977   | 1.142  |
| 98966_at   | 368.6  | 185.5  | 299.9  | 236.6  | 230.5  | 385.8  | 311.6  | 254.2  | 0.679061494 | 272.65   | 295.525  | 22.875  | 0.922595381 | 0.6363   | 1.098  |
| 98967_at   | 27.5   | 33.2   | 37.9   | 15.8   | 62.6   | 45.4   | 65.8   | 59     | 0.004048073 | 28.6     | 58.2     | 29.6    | 0.491408935 | 0.01173  | 2.12   |
| 98968_at   | 62.7   | 46.7   | 60.2   | 50.4   | 75.9   | 71.8   | 74     | 63.7   | 0.015481912 | 55       | 71.35    | 16.35   | 0.770847933 | 0.01651  | 1.304  |
| 98969_at   | 124.1  | 141.1  | 59.1   | 122.5  | 151.1  | 172.6  | 140.2  | 50.5   | 0.622962847 | 111.7    | 128.6    | 16.9    | 0.868584759 | 0.7939   | -1.099 |
| 98970_at   | 293.2  | 292.6  | 333.1  | 295.9  | 348.3  | 353.9  | 281.5  | 226.1  | 0.970762862 | 303.7    | 302.45   | 1.25    | 1.004132915 | 0.8698   | -1.019 |
| 98971_at   | 23.5   | 26.1   | 32.1   | 37.7   | 36.2   | 52.4   | 37.5   | 35.3   | 0.089772459 | 29.85    | 40.35    | 10.5    | 0.739776952 | 0.07305  | 1.356  |
| 98972_at   | 721.7  | 630.8  | 589.1  | 855.9  | 524.5  | 599.7  | 680.2  | 711.7  | 0.373244402 | 699.375  | 629.025  | 70.35   | 1.111839752 | 0.3755   | -1.108 |
| 98973_at   | 1422.7 | 781.7  | 1093.8 | 920.2  | 524    | 1207.8 | 572.3  | 933.2  | 0.293022854 | 1054.6   | 809.325  | 245.275 | 1.303061193 | 0.2528   | -1.349 |
| 98974_at   | 0.5    | 2.3    | 2.7    | 10.9   | 2.7    | 1      | 1.7    | 3      | 0.455146873 | 4.1      | 2.1      | 2       | 1.952380952 | 0.7271   | -1.272 |
| 98975_at   | 430.6  | 376.8  | 403.1  | 503.8  | 301.1  | 363.9  | 334.1  | 466    | 0.218014379 | 428.575  | 366.275  | 62.3    | 1.170090779 | 0.1922   | -1.179 |
| 98976_at   | 3.8    | 16.7   | 31.2   | 7.7    | 2.5    | 9.9    | 30.8   | 10.1   | 0.865172794 | 14.85    | 13.325   | 1.525   | 1.114446529 | 0.8188   | -1.179 |
| 98977_at   | 441.1  | 458.7  | 488.3  | 495.4  | 417.8  | 438.9  | 382.8  | 387.9  | 0.012914375 | 470.875  | 406.85   | 64.025  | 1.15736758  | 0.01306  | -1.158 |
| 98979_at   | 655.8  | 512.4  | 512.7  | 545.7  | 447.2  | 550.1  | 559    | 455.6  | 0.280938669 | 556.65   | 502.975  | 53.675  | 1.106715045 | 0.2693   | -1.107 |
| 98980_at   | 81.1   | 65.8   | 71     | 61     | 80.4   | 111.1  | 92.9   | 154.4  | 0.086248245 | 69.725   | 109.7    | 39.975  | 0.635597083 | 0.03151  | 1.534  |
| 98981_s_at | 1913.4 | 2121.7 | 2006.1 | 2432.7 | 1947   | 2158.3 | 2006.2 | 2669.1 | 0.715350338 | 2118.475 | 2195.15  | 76.675  | 0.965070724 | 0.7306   | -1.032 |
| 98982_at   | 3349.1 | 4261   | 3629.4 | 3240.3 | 4116.1 | 3561.9 | 3521.5 | 3358.5 | 0.94720966  | 3619.95  | 3639.5   | 19.55   | 0.994628383 | 0.9173   | -1.008 |
| 98983_at   | 819.7  | 685    | 815.3  | 742.2  | 781.3  | 935    | 813.2  | 846.6  | 0.140321103 | 765.55   | 844.025  | 78.475  | 0.907022896 | 0.1394   | -1.103 |
| 98984_f_at | 306.1  | 335.2  | 281.1  | 290.6  | 425    | 280.2  | 354.4  | 302.3  | 0.341714033 | 303.25   | 340.475  | 37.225  | 0.89066745  | 0.3335   | -1.111 |
| 98987_at   | 211.3  | 218    | 176.8  | 287.5  | 234.1  | 174.4  | 175.5  | 277.7  | 0.822941672 | 223.4    | 215.425  | 7.975   | 1.037019844 | 0.7973   | -1.042 |
| 98988_at   | 49     | 88     | 69.3   | 98.3   | 54.8   | 94.4   | 47.5   | 125    | 0.847498322 | 76.15    | 80.425   | 4.275   | 0.946844887 | 0.9689   | -1.011 |
| 98989_at   | 307    | 370.3  | 266    | 223.3  | 225.6  | 356.2  | 260.6  | 237.7  | 0.6337269   | 291.65   | 270.025  | 21.625  | 1.080085177 | 0.6259   | -1.079 |
| 98990_at   | 552.7  | 1030.5 | 668.7  | 758.5  | 648.9  | 628    | 665.5  | 684.7  | 0.416992154 | 752.6    | 656.775  | 95.825  | 1.145902326 | 0.4351   | -1.117 |
| 98991_at   | 260.4  | 177.9  | 234.6  | 232.5  | 201.8  | 230    | 183.2  | 218.1  | 0.411177619 | 226.35   | 208.275  | 18.075  | 1.0867843   | 0.4477   | -1.08  |
| 98992_at   | 391    | 354.7  | 420.3  | 333.1  | 408    | 361.4  | 338.3  | 336.2  | 0.608546078 | 374.775  | 360.975  | 13.8    | 1.038229794 | 0.6118   | -1.037 |
| 98993_at   | 1612.9 | 1341   | 1644.4 | 1694.9 | 1129.1 | 1326.2 | 1207.6 | 1449.3 | 0.031994096 | 1573.3   | 1278.05  | 295.25  | 1.231016001 | 0.03367  | -1.232 |
| 98994_at   | 18.1   | 18.1   | 28.4   | 8      | 46.2   | 26     | 32.6   | 18.5   | 0.134431758 | 18.15    | 30.825   | 12.675  | 0.588807786 | 0.1322   | 1.763  |
| 98995_at   | 309.2  | 276.6  | 324.2  | 315.8  | 266.8  | 329.5  | 337    | 280.8  | 0.891354572 | 306.45   | 303.525  | 2.925   | 1.009636768 | 0.8556   | -1.013 |
| 98996_at   | 1572.7 | 1833.8 | 2025.7 | 1616.6 | 1511.9 | 1408.1 | 1188.4 | 1369.4 | 0.024480311 | 1762.2   | 1369.45  | 392.75  | 1.286793968 | 0.0177   | -1.285 |
| 98997_f_at | 52.2   | 22.3   | 23.5   | 45.2   | 29.2   | 37.1   | 56.2   | 54.5   | 0.434030392 | 35.8     | 44.25    | 8.45    | 0.809039548 | 0.3978   | 1.279  |
| 98998_r_at | 117.1  | 104.4  | 147.2  | 127.6  | 167.7  | 109.9  | 138.4  | 125    | 0.493843741 | 124.075  | 135.25   | 11.175  | 0.917375231 | 0.5008   | -1.086 |
| 98999_at   | 809.6  | 720.4  | 1183.3 | 788.6  | 1079.7 | 864    | 1031   | 715    | 0.737551549 | 875.475  | 922.425  | 46.95   | 0.949101553 | 0.6993   | -1.06  |
| 99000_at   | 28     | 250    | 116.4  | 161.5  | 211    | 138    | 234.5  | 139.7  | 0.464266995 | 138.975  | 180.8    | 41.825  | 0.768667035 | 0.3543   | 1.642  |
| 99001_at   | 1182   | 602.8  | 771.9  | 958.4  | 694    | 946.7  | 679.7  | 808.2  | 0.521976747 | 878.775  | 782.15   | 96.625  | 1.123537685 | 0.5839   | -1.099 |
| 99004_r_at | 257.1  | 278.7  | 287.8  | 210.2  | 272.5  | 300.3  | 189.6  | 323.3  | 0.718319489 | 258.45   | 271.425  | 12.975  | 0.952196739 | 0.7995   | -1.037 |
| 99005_at   | 177.4  | 245.5  | 254.9  | 184.5  | 158.7  | 260.7  | 179    | 226.7  | 0.771782525 | 215.575  | 206.275  | 9.3     | 1.045085444 | 0.7462   | -1.051 |
| 99006_at   | 8      | 7.9    | 13     | 14     | 10.5   | 9.2    | 6.4    | 15.9   | 0.933079941 | 10.725   | 10.5     | 0.225   | 1.021428571 | 0.8773   | -1.04  |
| 99007_at   | 386.1  | 444.1  | 522.2  | 518.1  | 366.8  | 469.9  | 484.9  | 529    | 0.919693726 | 467.625  | 462.65   | 4.975   | 1.010753269 | 0.9138   | -1.012 |
| 99009_at   | 1093.9 | 1062.5 | 982.1  | 1279.8 | 866    | 1288.4 | 1074.7 | 1237.1 | 0.920326946 | 1104.575 | 1116.55  | 11.975  | 0.989274999 | 0.9722   | -1.004 |
| 99010_at   | 3896.9 | 4050.6 | 4124.2 | 3510.3 | 4611.8 | 4506.8 | 4456.1 | 4787.1 | 0.008017766 | 3895.5   | 4590.45  | 694.95  | 0.848609613 | 0.005634 | 1.18   |
| 99011_at   | 23.5   | 29.8   | 54.8   | 32.3   | 34.7   | 46.6   | 34.5   | 54.7   | 0.408717692 | 35.1     | 42.625   | 7.525   | 0.823460411 | 0.3279   | 1.253  |
| 99012_at   | 10.7   | 7.1    | 19.7   | 5      | 10     | 12.1   | 18.2   | 9.1    | 0.671722692 | 10.625   | 12.35    | 1.725   | 0.860323887 | 0.4875   | 1.278  |
| 99013_f_at | 5377.9 | 4863.7 | 5640.8 | 4926.3 | 5796.3 | 4882.4 | 5478.5 | 4093.5 | 0.753926395 | 5202.175 | 5062.675 | 139.5   | 1.027554603 | 0.7021   | -1.035 |
| 99014_at   | 157.4  | 187.3  | 281.2  | 290.4  | 352.5  | 267.7  | 339.1  | 275.3  | 0.100303689 | 229.075  | 308.65   | 79.575  | 0.742183703 | 0.1002   | 1.383  |
| 99015_at   | 405.8  | 444.9  | 375.7  | 481.6  | 308.1  | 420    | 380.7  | 469.4  | 0.464092655 | 427      | 394.55   | 32.45   | 1.082245596 | 0.4403   | -1.09  |
| 99016_at   | 85.5   | 101.2  | 138.8  | 166.2  | 105.6  | 107.5  | 144.8  | 143.9  | 0.910208096 | 122.925  | 125.45   | 2.525   | 0.979872459 | 0.8155   | -1.043 |
| 99018_at   | 190.6  | 101.4  | 185.7  | 149.5  | 134.4  | 185.1  | 112.2  | 113.8  | 0.47472234  | 156.8    | 136.375  | 20.425  | 1.149770852 | 0.5085   | -1.14  |
| 99019_at   | 303    | 522.8  | 328.1  | 418.5  | 542.6  | 478.5  | 528.6  | 462.5  | 0.110964534 | 393.1    | 503.05   | 109.95  | 0.781433257 | 0.08425  | 1.307  |
| 99020_at   | 38.1   | 46.4   | 105.8  | 96.4   | 47.1   | 33.8   | 24.3   | 40.7   | 0.130539243 | 71.675   | 36.475   | 35.2    | 1.965044551 | 0.08339  | -1.839 |
| 99021_at   | 57.3   | 63     | 76.5   | 54.2   | 74.1   | 61.2   | 89.8   | 69.8   | 0.208796718 | 62.75    | 73.725   | 10.975  | 0.851135978 | 0.1951   | 1.174  |



|            |        |        |        |        |        |        |        |        |             |          |          |         |             |           |        |
|------------|--------|--------|--------|--------|--------|--------|--------|--------|-------------|----------|----------|---------|-------------|-----------|--------|
| 99023_at   | 1081.9 | 857.3  | 875.5  | 963.9  | 722.6  | 801.9  | 598.1  | 740.6  | 0.01477114  | 944.65   | 715.8    | 228.85  | 1.31971221  | 0.01433   | -1.322 |
| 99024_at   | 944.5  | 1435.4 | 989.9  | 888.9  | 2956.9 | 1320.7 | 1957.8 | 1326.2 | 0.118617436 | 1064.675 | 1890.4   | 825.725 | 0.56320091  | 0.05126   | 1.707  |
| 99025_at   | 542.1  | 640    | 430.4  | 731.3  | 474.8  | 583.4  | 565.5  | 650.2  | 0.823426171 | 585.95   | 568.475  | 17.475  | 1.030740138 | 0.8986    | -1.018 |
| 99026_at   | 13.2   | 10.9   | 17.6   | 5.7    | 6.7    | 15.6   | 11.1   | 9.9    | 0.752057609 | 11.85    | 10.825   | 1.025   | 1.094688222 | 0.8563    | -1.058 |
| 99027_at   | 922.5  | 913    | 858.1  | 942.1  | 672    | 947.5  | 1093.2 | 1119.9 | 0.667128039 | 908.925  | 958.15   | 49.225  | 0.948624954 | 0.7867    | -1.034 |
| 99028_at   | 829.3  | 594.4  | 637.5  | 642.3  | 482.3  | 660.3  | 645.3  | 592.9  | 0.270236992 | 675.875  | 595.2    | 80.675  | 1.135542675 | 0.2632    | -1.135 |
| 99029_at   | 504.9  | 426    | 426.9  | 409.6  | 408    | 445.4  | 452.5  | 408.2  | 0.610906886 | 441.85   | 428.525  | 13.325  | 1.031095035 | 0.618     | -1.029 |
| 99030_at   | 39     | 49.1   | 30.8   | 26.7   | 29     | 42.7   | 35     | 43.8   | 0.846876405 | 36.4     | 37.625   | 1.225   | 0.96744186  | 0.7851    | -1.048 |
| 99031_at   | 427.2  | 379.3  | 499.1  | 453.6  | 282.3  | 484.1  | 431.6  | 406.1  | 0.470577385 | 439.8    | 401.025  | 38.775  | 1.096689733 | 0.443     | -1.113 |
| 99032_at   | 228.1  | 338    | 336.4  | 481    | 447    | 428.7  | 490    | 532.6  | 0.08371799  | 345.875  | 474.575  | 128.7   | 0.728809988 | 0.07296   | 1.415  |
| 99033_at   | 635.6  | 861.6  | 648.3  | 728.6  | 715.9  | 802.6  | 720.1  | 564.1  | 0.812219311 | 718.525  | 700.675  | 17.85   | 1.025475434 | 0.8091    | -1.026 |
| 99034_at   | 93     | 79.2   | 87.7   | 73.5   | 109.5  | 101.9  | 85.3   | 102    | 0.051945367 | 83.35    | 99.675   | 16.325  | 0.836217708 | 0.05352   | 1.196  |
| 99035_at   | 250.2  | 246.7  | 296.9  | 260.8  | 177.6  | 300.8  | 161.9  | 151.6  | 0.153537975 | 263.65   | 197.975  | 65.675  | 1.331733805 | 0.09222   | -1.382 |
| 99036_s_at | 45.2   | 76.2   | 114.5  | 108.1  | 70     | 92.8   | 59.5   | 72.6   | 0.519067703 | 86       | 73.725   | 12.275  | 1.166497118 | 0.6693    | -1.11  |
| 99037_at   | 11.4   | 16.7   | 16     | 20.4   | 52.9   | 14.7   | 14.9   | 18.4   | 0.401673887 | 16.125   | 25.225   | 9.1     | 0.639246779 | 0.3842    | 1.361  |
| 99038_at   | 1538.3 | 1182.6 | 1285.6 | 1383.6 | 985.6  | 1371.2 | 1190.3 | 1340.4 | 0.321811053 | 1347.525 | 1221.875 | 125.65  | 1.10283376  | 0.3213    | -1.107 |
| 99039_g_at | 2400.7 | 1802.3 | 1976.3 | 2391.9 | 1422.8 | 2301.4 | 1817.1 | 1921.7 | 0.284755312 | 2142.8   | 1865.75  | 277.05  | 1.148492563 | 0.2794    | -1.156 |
| 99040_at   | 14     | 12.6   | 11.6   | 14.3   | 14.5   | 26.2   | 7.4    | 17.8   | 0.455985048 | 13.125   | 16.475   | 3.35    | 0.796661608 | 0.6386    | 1.143  |
| 99041_at   | 671.6  | 584.6  | 703    | 573.2  | 457.8  | 649.6  | 479.4  | 676.3  | 0.350049405 | 633.1    | 565.775  | 67.325  | 1.118996067 | 0.3148    | -1.132 |
| 99042_s_at | 58.8   | 78.5   | 54.8   | 55.3   | 79.3   | 87.3   | 55.1   | 91.4   | 0.153548705 | 61.85    | 78.275   | 16.425  | 0.790162887 | 0.1617    | 1.256  |
| 99043_s_at | 14.5   | 13.6   | 11.6   | 13.7   | 19.3   | 12.7   | 22.8   | 12.6   | 0.262300774 | 13.35    | 16.85    | 3.5     | 0.792284866 | 0.2453    | 1.223  |
| 99044_at   | 346.6  | 339.2  | 401    | 314.9  | 357.9  | 416.4  | 337.8  | 362.7  | 0.488098362 | 350.425  | 368.7    | 18.275  | 0.950433957 | 0.4717    | -1.053 |
| 99045_at   | 54.3   | 78.8   | 94.1   | 81.6   | 93.8   | 100.6  | 88.2   | 93.1   | 0.135977083 | 77.2     | 93.925   | 16.725  | 0.821932393 | 0.1251    | 1.239  |
| 99046_at   | 2.1    | 4.7    | 1.6    | 16.5   | 4.3    | 9.3    | 2.1    | 1.7    | 0.653885449 | 6.225    | 4.35     | 1.875   | 1.431034483 | 0.8286    | -1.158 |
| 99047_at   | 47.6   | 48.4   | 32.1   | 16.2   | 11.1   | 38.9   | 16.6   | 57.1   | 0.708022446 | 36.075   | 30.925   | 5.15    | 1.166531932 | 0.5762    | -1.31  |
| 99048_g_at | 5      | 7.3    | 8.7    | 8.5    | 7.1    | 6.8    | 12.2   | 9.3    | 0.371157247 | 7.375    | 8.85     | 1.475   | 0.833333333 | 0.3684    | 1.197  |
| 99049_at   | 1384.5 | 1002.8 | 1315.6 | 1367.9 | 922.1  | 1226.6 | 1135.9 | 1106.6 | 0.178474025 | 1267.7   | 1097.8   | 169.9   | 1.154764074 | 0.1973    | -1.151 |
| 99050_at   | 70.8   | 91.3   | 96.6   | 42.6   | 75.1   | 70.1   | 27.7   | 126.3  | 0.983132632 | 75.325   | 74.8     | 0.525   | 1.007018717 | 0.8103    | -1.096 |
| 99051_at   | 160.8  | 121.7  | 121.4  | 122.2  | 145.8  | 98.2   | 149.3  | 92.7   | 0.600547107 | 131.525  | 121.5    | 10.025  | 1.082510288 | 0.5344    | -1.1   |
| 99052_at   | 1740   | 1440.2 | 1651.3 | 1609   | 1156.6 | 1417.8 | 1244   | 1595.1 | 0.075815564 | 1610.125 | 1353.375 | 256.75  | 1.189710908 | 0.07061   | -1.196 |
| 99053_at   | 85.3   | 112.1  | 64.3   | 92.6   | 92.5   | 139.5  | 137.1  | 128.3  | 0.05124878  | 88.575   | 124.35   | 35.775  | 0.712303981 | 0.06099   | 1.413  |
| 99054_at   | 1026.7 | 1936.4 | 1580.1 | 1494.9 | 1273.7 | 1690.8 | 1712.8 | 1707.5 | 0.705402742 | 1509.525 | 1596.2   | 86.675  | 0.945699161 | 0.6444    | -1.076 |
| 99055_at   | 96.7   | 124.7  | 104    | 113    | 130.5  | 102    | 119.5  | 159.3  | 0.240550569 | 109.6    | 127.825  | 18.225  | 0.857422257 | 0.2263    | 1.156  |
| 99056_at   | 283.5  | 213.9  | 279.6  | 257.9  | 80.5   | 91.6   | 91.8   | 113.7  | 0.000625541 | 258.725  | 94.4     | 164.325 | 2.740730932 | 0.0000444 | -2.745 |
| 99057_at   | 80     | 97.1   | 42.5   | 85.3   | 106.7  | 52.4   | 25.9   | 211.1  | 0.624981197 | 76.225   | 99.025   | 22.8    | 0.769755112 | 0.9685    | -1.02  |
| 99058_at   | 8.2    | 55.1   | 7.5    | 6.8    | 61.5   | 56.2   | 25.1   | 53.1   | 0.092350296 | 19.4     | 48.975   | 29.575  | 0.39612047  | 0.05007   | 3.757  |
| 99059_at   | 302.2  | 323.4  | 217.8  | 315.4  | 285.5  | 363    | 209.4  | 404.4  | 0.624877063 | 289.7    | 315.575  | 25.875  | 0.918006813 | 0.7112    | -1.069 |
| 99062_at   | 60.8   | 39.6   | 67.7   | 66.9   | 53.8   | 61.5   | 50.8   | 95.1   | 0.611516584 | 58.75    | 65.3     | 6.55    | 0.899693721 | 0.6342    | 1.1    |
| 99063_at   | 174.2  | 151.4  | 123.4  | 155.5  | 168.5  | 123.6  | 142.8  | 173.5  | 0.952424335 | 151.125  | 152.1    | 0.975   | 0.993589744 | 0.9653    | -1.005 |
| 99064_at   | 1124.2 | 1140   | 1314.4 | 1199.2 | 1271.1 | 1079.9 | 1233.1 | 1283.6 | 0.736459353 | 1194.45  | 1216.925 | 22.475  | 0.981531319 | 0.7448    | -1.018 |
| 99065_at   | 72.4   | 66.4   | 13     | 97.9   | 11.2   | 19.2   | 60.9   | 19.3   | 0.159281302 | 62.425   | 27.65    | 34.775  | 2.257685353 | 0.2183    | -2.217 |
| 99067_at   | 1271.1 | 2359   | 1793.9 | 1603.7 | 1737.3 | 2115.2 | 2411.1 | 1621.6 | 0.490169979 | 1756.925 | 1971.3   | 214.375 | 0.891251966 | 0.4485    | 1.136  |
| 99068_at   | 1001.1 | 1063.8 | 1119.3 | 1041.1 | 876.9  | 942.9  | 936    | 1026.3 | 0.032240641 | 1056.325 | 945.525  | 110.8   | 1.117183575 | 0.03102   | -1.118 |
| 99069_at   | 12.2   | 23.5   | 10     | 13.1   | 14.6   | 8.1    | 5.7    | 11.5   | 0.24266034  | 14.7     | 9.975    | 4.725   | 1.473684211 | 0.2012    | -1.482 |
| 99070_at   | 528    | 722.6  | 686.7  | 712.5  | 526.5  | 809.4  | 679.6  | 645.1  | 0.972085611 | 662.45   | 665.15   | 2.7     | 0.995940765 | 0.9986    | -1     |
| 99071_at   | 253.7  | 313.6  | 259.6  | 234.5  | 359.7  | 237    | 404.5  | 261.7  | 0.307365105 | 265.35   | 315.725  | 50.375  | 0.840446591 | 0.3129    | 1.168  |
| 99073_at   | 777.9  | 660.6  | 822.4  | 778.9  | 612.8  | 606.9  | 680.2  | 641.1  | 0.028398186 | 759.95   | 635.25   | 124.7   | 1.196300669 | 0.01698   | -1.194 |
| 99074_at   | 3      | 6.8    | 5      | 5.1    | 6.9    | 38.5   | 4.6    | 47.4   | 0.173451558 | 4.975    | 24.35    | 19.375  | 0.204312115 | 0.1043    | 3.263  |
| 99076_at   | 493.2  | 311.9  | 398    | 382.8  | 203.9  | 424.2  | 277.3  | 297.8  | 0.158470329 | 396.475  | 300.8    | 95.675  | 1.318068484 | 0.1449    | -1.346 |
| 99077_at   | 192.2  | 300.7  | 243.5  | 260.4  | 294    | 304.3  | 286.7  | 200.3  | 0.525675679 | 249.2    | 271.325  | 22.125  | 0.918455727 | 0.5547    | -1.088 |
| 99078_at   | 407.4  | 525.3  | 467.2  | 396.8  | 546.6  | 396.7  | 584.5  | 409.9  | 0.557037315 | 449.175  | 484.425  | 35.25   | 0.927233318 | 0.5891    | -1.07  |
| 99080_at   | 294.6  | 408.8  | 287.6  | 556.2  | 352.3  | 484.6  | 406.2  | 488    | 0.548563563 | 386.8    | 432.775  | 45.975  | 0.893766969 | 0.4499    | 1.151  |
| 99081_at   | 2315.4 | 1883.2 | 1986.2 | 1979.9 | 2107.9 | 2025.6 | 2191.8 | 2104.6 | 0.546922329 | 2041.175 | 2107.475 | 66.3    | 0.968540552 | 0.4935    | -1.035 |
| 99082_at   | 1182.6 | 1774.2 | 1393.7 | 1380.1 | 1578.7 | 1953.2 | 1736.4 | 1536.1 | 0.138622833 | 1432.65  | 1701.1   | 268.45  | 0.842190347 | 0.125     | 1.195  |
| 99083_at   | 18.6   | 28.4   | 58.5   | 59.1   | 32.7   | 36.1   | 91.8   | 109.1  | 0.290572925 | 41.15    | 67.425   | 26.275  | 0.610307749 | 0.3101    | 1.596  |
| 99084_s_at | 1563   | 1399.8 | 1497.6 | 1456.6 | 1276   | 1514.7 | 1529.4 | 1681.8 | 0.826313572 | 1479.25  | 1500.475 | 21.225  | 0.985854479 | 0.8749    | -1.01  |



|            |         |         |         |         |        |         |         |         |             |           |          |          |             |          |        |
|------------|---------|---------|---------|---------|--------|---------|---------|---------|-------------|-----------|----------|----------|-------------|----------|--------|
| 99085_at   | 1086.7  | 916.9   | 1021.2  | 965     | 988.1  | 1096.3  | 1012    | 943.1   | 0.807334787 | 997.45    | 1009.875 | 12.425   | 0.987696497 | 0.7987   | -1.013 |
| 99086_g_at | 575.8   | 579.1   | 515.1   | 641.4   | 476.8  | 610.5   | 499.8   | 692.3   | 0.893385827 | 577.85    | 569.85   | 8        | 1.014038782 | 0.8268   | -1.023 |
| 99087_at   | 4081.2  | 2868.1  | 4020.5  | 3302.2  | 3252.7 | 3542.6  | 3586.9  | 3346.7  | 0.681175947 | 3568      | 3432.225 | 135.775  | 1.039558887 | 0.7507   | -1.03  |
| 99089_at   | 114.1   | 50.7    | 68.4    | 97.7    | 98.6   | 89.6    | 93.1    | 116.5   | 0.339875129 | 82.725    | 99.45    | 16.725   | 0.831825038 | 0.2792   | 1.255  |
| 99093_at   | 13795.7 | 14472.3 | 11940.3 | 12117.2 | 19560  | 11133.2 | 12966.8 | 13471.8 | 0.570520055 | 13081.375 | 14282.95 | 1201.575 | 0.915873472 | 0.6122   | -1.071 |
| 99094_at   | 42.2    | 20.8    | 19.2    | 35.8    | 16     | 12.6    | 32.1    | 44.3    | 0.739014751 | 29.5      | 26.25    | 3.25     | 1.123809524 | 0.6187   | -1.203 |
| 99095_at   | 834.3   | 851.8   | 767.1   | 852.2   | 711.7  | 928.4   | 911     | 943.2   | 0.463207807 | 826.35    | 873.575  | 47.225   | 0.945940532 | 0.5075   | -1.051 |
| 99096_at   | 818.5   | 755     | 709.8   | 751.9   | 782.4  | 880.9   | 749.4   | 884.4   | 0.169678182 | 758.8     | 824.275  | 65.475   | 0.920566558 | 0.163    | -1.085 |
| 99097_at   | 68.6    | 66      | 74.1    | 92.5    | 41.4   | 87.3    | 81.3    | 43.5    | 0.424264414 | 75.3      | 63.375   | 11.925   | 1.18816568  | 0.3383   | -1.248 |
| 99098_at   | 4079.5  | 3844.3  | 4260.4  | 3393.6  | 5960.7 | 3822.5  | 4731.5  | 4206    | 0.193557019 | 3894.45   | 4680.175 | 785.725  | 0.83211632  | 0.1591   | 1.189  |
| 99099_at   | 546.4   | 602.5   | 591.6   | 603.3   | 590    | 608.6   | 700.5   | 636.8   | 0.146848912 | 585.95    | 633.975  | 48.025   | 0.924247802 | 0.1301   | -1.081 |
| 99100_at   | 287.5   | 346.8   | 355.9   | 393.6   | 324.9  | 383     | 429.9   | 455.5   | 0.200796153 | 345.95    | 398.325  | 52.375   | 0.868511894 | 0.2105   | 1.149  |
| 99101_at   | 3559.1  | 3434.7  | 3394.1  | 3135.5  | 3514.6 | 3409.6  | 3562.4  | 2936.2  | 0.88736616  | 3380.85   | 3355.7   | 25.15    | 1.00749471  | 0.8634   | -1.009 |
| 99102_at   | 344.2   | 266.5   | 255.3   | 292.8   | 207.4  | 314     | 236.3   | 197     | 0.177282359 | 289.7     | 238.675  | 51.025   | 1.213784435 | 0.1497   | -1.226 |
| 99103_at   | 443     | 479.4   | 481.3   | 459.9   | 514.2  | 479     | 544.3   | 491.1   | 0.05892671  | 465.9     | 507.15   | 41.25    | 0.918663117 | 0.04916  | -1.088 |
| 99104_at   | 31.4    | 20.8    | 32.4    | 23.4    | 41.5   | 24.6    | 66.2    | 32      | 0.220513449 | 27        | 41.075   | 14.075   | 0.657334145 | 0.1734   | 1.444  |
| 99106_at   | 3117.1  | 3474.1  | 3618.5  | 2898.6  | 4059.9 | 3196.6  | 3381.9  | 2808.2  | 0.795152497 | 3277.075  | 3361.65  | 84.575   | 0.974841224 | 0.8312   | -1.021 |
| 99107_at   | 299.3   | 286.3   | 318.2   | 297.6   | 296.7  | 361.1   | 269.9   | 283.6   | 0.913368325 | 300.35    | 302.825  | 2.475    | 0.991826963 | 0.9696   | -1.003 |
| 99108_s_at | 184.4   | 161.4   | 164.1   | 202.8   | 171.4  | 196.2   | 138     | 188.7   | 0.786280345 | 178.175   | 173.575  | 4.6      | 1.026501512 | 0.7577   | -1.031 |
| 99109_at   | 570.7   | 1120.2  | 779.5   | 785.2   | 922.8  | 747.3   | 838.9   | 781     | 0.946575186 | 813.9     | 822.5    | 8.6      | 0.989544073 | 0.8128   | -1.037 |
| 99111_at   | 317.1   | 400.9   | 365.9   | 406.9   | 410.5  | 347.1   | 396.4   | 400.1   | 0.552937702 | 372.7     | 388.525  | 15.825   | 0.95926903  | 0.5422   | -1.045 |
| 99112_at   | 371.8   | 413.4   | 408.8   | 521.9   | 451.6  | 515.8   | 476.1   | 333.7   | 0.773419286 | 428.975   | 444.3    | 15.325   | 0.96550754  | 0.8085   | -1.031 |
| 99113_at   | 1826.8  | 1683.7  | 1748.1  | 1534.4  | 2296.2 | 1621.1  | 1874.8  | 1994.6  | 0.178008773 | 1698.25   | 1946.675 | 248.425  | 0.872384964 | 0.1582   | 1.14   |
| 99114_r_at | 179.7   | 156.7   | 153.3   | 141.3   | 257.9  | 141     | 207.3   | 153.7   | 0.321518518 | 157.75    | 189.975  | 32.225   | 0.830372417 | 0.3185   | 1.174  |
| 99115_at   | 6082.7  | 4666.1  | 5082.7  | 4801.6  | 7059.3 | 4792.3  | 5655.2  | 4248.3  | 0.703467521 | 5158.275  | 5438.775 | 280.5    | 0.948425886 | 0.7602   | -1.041 |
| 99118_at   | 2.4     | 7.5     | 14.8    | 4.4     | 6.2    | 10.1    | 22.1    | 7.4     | 0.396497498 | 7.275     | 11.45    | 4.175    | 0.635371179 | 0.3028   | 1.721  |
| 99119_at   | 7752.7  | 6413.2  | 6822.3  | 5834.8  | 6845.7 | 6336.1  | 5965.1  | 6073.2  | 0.418563964 | 6705.75   | 6305.025 | 400.725  | 1.063556449 | 0.4219   | -1.059 |
| 99120_f_at | 2906.1  | 5584.3  | 3543.1  | 4046.5  | 6220.8 | 4229.7  | 4728.8  | 4748.9  | 0.230614876 | 4020      | 4982.05  | 962.05   | 0.806896759 | 0.1953   | 1.262  |
| 99121_at   | 211.7   | 197.5   | 168.8   | 216.9   | 153.2  | 174.6   | 150.5   | 216     | 0.229634953 | 198.725   | 173.575  | 25.15    | 1.144894138 | 0.2093   | -1.152 |
| 99123_s_at | 843.6   | 970.5   | 968.1   | 827.3   | 1440.3 | 907.5   | 971.2   | 902.7   | 0.327673908 | 902.375   | 1055.425 | 153.05   | 0.854987327 | 0.2873   | 1.15   |
| 99124_at   | 138     | 137.6   | 126.4   | 180.7   | 272.6  | 176.5   | 154.7   | 118.9   | 0.376619191 | 145.675   | 180.675  | 35       | 0.806281998 | 0.3832   | 1.196  |
| 99126_at   | 18.5    | 14.8    | 49.7    | 36.1    | 33.6   | 21.1    | 33.1    | 26.3    | 0.892278537 | 29.775    | 28.525   | 1.25     | 1.043821209 | 0.8553   | -1.06  |
| 99127_at   | 5570.5  | 4857.1  | 4675.3  | 4050    | 4507.7 | 5169    | 4450.9  | 4535.6  | 0.745654593 | 4788.225  | 4665.8   | 122.425  | 1.026238801 | 0.7833   | -1.022 |
| 99128_at   | 5157.6  | 4601.9  | 4525.8  | 3239.1  | 7443.8 | 4241    | 4483.2  | 3064.1  | 0.695493595 | 4381.1    | 4808.025 | 426.925  | 0.911205745 | 0.8011   | -1.057 |
| 99129_at   | 1032.9  | 780.5   | 838.6   | 796.8   | 698.2  | 930.5   | 800     | 659.7   | 0.324578057 | 862.2     | 772.1    | 90.1     | 1.116694729 | 0.3019   | -1.12  |
| 99130_at   | 6.9     | 35.4    | 14.9    | 27.7    | 9.3    | 19.7    | 7.9     | 36.4    | 0.762278617 | 21.225    | 18.325   | 2.9      | 1.158253752 | 0.7605   | -1.175 |
| 99133_at   | 3016.3  | 3644.8  | 3654.4  | 3513.8  | 3686   | 2958.6  | 3877.7  | 3427.6  | 0.908023828 | 3457.325  | 3487.475 | 30.15    | 0.991354777 | 0.9324   | -1.007 |
| 99134_at   | 128.1   | 95.9    | 114.8   | 157.5   | 103.7  | 118.6   | 104.8   | 125.6   | 0.480203157 | 124.075   | 113.175  | 10.9     | 1.096311023 | 0.5129   | -1.082 |
| 99135_at   | 2135.7  | 1818.8  | 2082.1  | 1805.2  | 1973.3 | 1881.8  | 2184.3  | 1976.4  | 0.701070289 | 1960.45   | 2003.95  | 43.5     | 0.978292872 | 0.681    | -1.024 |
| 99136_at   | 19      | 15      | 21.6    | 67.6    | 13.5   | 8.4     | 16.7    | 57.3    | 0.696945427 | 30.8      | 23.975   | 6.825    | 1.284671533 | 0.5496   | -1.398 |
| 99138_at   | 339.8   | 363.5   | 397     | 342.5   | 285    | 337.8   | 302.5   | 286.9   | 0.018687847 | 360.7     | 303.05   | 57.65    | 1.190232635 | 0.01684  | -1.191 |
| 99139_at   | 383.9   | 484.6   | 512.1   | 743.3   | 437.9  | 548.7   | 530.8   | 721.7   | 0.77553312  | 530.975   | 559.775  | 28.8     | 0.948550757 | 0.7152   | -1.068 |
| 99140_at   | 852.8   | 951.5   | 834.8   | 808.9   | 1155.9 | 774.8   | 918.7   | 923     | 0.394064021 | 862       | 943.1    | 81.1     | 0.914006998 | 0.3961   | -1.085 |
| 99141_at   | 1907.2  | 1569    | 2274.1  | 1591    | 1684.2 | 1183.9  | 1428.3  | 1221.8  | 0.069614652 | 1835.325  | 1379.55  | 455.775  | 1.330379472 | 0.05475  | -1.328 |
| 99142_at   | 402.7   | 503.4   | 412.2   | 388.6   | 633.9  | 434.6   | 601.4   | 611.2   | 0.043598212 | 426.725   | 570.275  | 143.55   | 0.748279339 | 0.03535  | 1.329  |
| 99143_at   | 1526.7  | 1184.1  | 1172.3  | 1476.8  | 1317.6 | 1398.8  | 1355.3  | 1220.3  | 0.875246904 | 1339.975  | 1323     | 16.975   | 1.012830688 | 0.9334   | -1.007 |
| 99144_s_at | 600.1   | 467     | 493.2   | 658.2   | 411.5  | 486.7   | 462.5   | 331.9   | 0.061882932 | 554.625   | 423.15   | 131.475  | 1.310705424 | 0.0602   | -1.312 |
| 99146_at   | 333     | 425.1   | 328.5   | 381.6   | 359.9  | 411.1   | 295.8   | 408.4   | 0.962164867 | 367.05    | 368.8    | 1.75     | 0.995254881 | 0.9863   | -1.002 |
| 99147_at   | 1244.5  | 1284.3  | 1071.6  | 898.8   | 1893.1 | 996.1   | 1139.6  | 1256.3  | 0.414169585 | 1124.8    | 1321.275 | 196.475  | 0.851298935 | 0.4158   | 1.151  |
| 99148_at   | 2216.8  | 1793    | 2063.6  | 1805.4  | 2120.4 | 1935    | 2116.6  | 1474.8  | 0.764324451 | 1969.7    | 1911.7   | 58       | 1.030339488 | 0.7296   | -1.037 |
| 99149_at   | 1316.5  | 1303.5  | 1159.6  | 1241.5  | 681.3  | 866.3   | 782.5   | 808.4   | 0.00011353  | 1255.275  | 784.625  | 470.65   | 1.599840688 | 0.000188 | -1.604 |
| 99150_at   | 699.7   | 678.6   | 587.9   | 623.8   | 1095.5 | 574.4   | 767.4   | 669.9   | 0.339959419 | 647.5     | 776.8    | 129.3    | 0.833547889 | 0.3217   | 1.167  |
| 99151_at   | 1164.1  | 682.9   | 903.8   | 765.6   | 699    | 851.1   | 828     | 718.5   | 0.405031483 | 879.1     | 774.15   | 104.95   | 1.135568042 | 0.415    | -1.117 |
| 99152_at   | 176.1   | 319.2   | 209.5   | 300.1   | 97.2   | 328.3   | 346.2   | 313.2   | 0.780448583 | 251.225   | 271.225  | 20       | 0.926260485 | 0.9876   | -1.005 |
| 99153_at   | 506.9   | 418.2   | 452.5   | 445.4   | 728.1  | 411.7   | 532.7   | 420     | 0.433853552 | 455.75    | 523.125  | 67.375   | 0.871206691 | 0.4481   | 1.119  |
| 99154_s_at | 815.8   | 624.7   | 630     | 616.1   | 632.7  | 591.6   | 557.6   | 557.1   | 0.169356571 | 671.65    | 584.75   | 86.9     | 1.148610517 | 0.1219   | -1.142 |



|            |         |         |         |         |         |         |         |        |             |           |          |          |             |          |        |
|------------|---------|---------|---------|---------|---------|---------|---------|--------|-------------|-----------|----------|----------|-------------|----------|--------|
| 99156_at   | 738.8   | 720.1   | 751.7   | 747.2   | 924.1   | 735.3   | 777.9   | 556.6  | 0.912844456 | 739.45    | 748.475  | 9.025    | 0.987942149 | 0.9718   | -1.004 |
| 99157_at   | 488.6   | 430.5   | 525.4   | 488     | 586.7   | 475.9   | 538.2   | 381.8  | 0.808017215 | 483.125   | 495.65   | 12.525   | 0.974730152 | 0.8848   | -1.016 |
| 99158_at   | 533.6   | 448.8   | 383.1   | 351.8   | 403.3   | 488.3   | 398.1   | 348.7  | 0.705732395 | 429.325   | 409.6    | 19.725   | 1.048156738 | 0.7308   | -1.042 |
| 99159_at   | 189.4   | 287.4   | 269.1   | 352     | 256     | 321.7   | 318.2   | 296.7  | 0.552824438 | 274.475   | 298.15   | 23.675   | 0.920593661 | 0.4889   | -1.108 |
| 99160_s_at | 764.4   | 618.9   | 732.7   | 655.7   | 556.3   | 905.2   | 678.4   | 814.2  | 0.613698112 | 692.925   | 738.525  | 45.6     | 0.938255306 | 0.6824   | -1.052 |
| 99161_at   | 1321.5  | 1244.5  | 1092.2  | 1288.7  | 991.9   | 1432.5  | 1490.4  | 1776.1 | 0.341482533 | 1236.725  | 1422.725 | 186      | 0.869264967 | 0.385    | 1.129  |
| 99162_at   | 780.5   | 1124.9  | 758.6   | 931.2   | 817.5   | 935.4   | 892.9   | 914.4  | 0.926473736 | 898.8     | 890.05   | 8.75     | 1.009830908 | 0.987    | -1.002 |
| 99163_at   | 390.7   | 548.4   | 356.2   | 435.5   | 485.5   | 543.8   | 414.6   | 465.6  | 0.408633402 | 432.7     | 477.375  | 44.675   | 0.906415292 | 0.3631   | -1.113 |
| 99164_at   | 1170.6  | 933.9   | 1030.2  | 988.8   | 1135.1  | 1036.5  | 1046.3  | 822.3  | 0.811862606 | 1030.875  | 1010.05  | 20.825   | 1.020617791 | 0.7869   | -1.024 |
| 99166_at   | 1622.5  | 2183.2  | 1805.3  | 1000.7  | 3764.6  | 1598.9  | 2002.2  | 1563.7 | 0.367745406 | 1652.925  | 2232.35  | 579.425  | 0.740441687 | 0.3456   | 1.31   |
| 99167_at   | 1003    | 1066.4  | 1099.6  | 982.5   | 1238.4  | 1039.8  | 980.8   | 1066.9 | 0.515329116 | 1037.875  | 1081.475 | 43.6     | 0.95968469  | 0.5193   | -1.039 |
| 99168_at   | 671.8   | 797.4   | 667.4   | 750.2   | 602.4   | 839.5   | 784.2   | 644.5  | 0.952487386 | 721.7     | 717.65   | 4.05     | 1.005643419 | 0.8978   | -1.012 |
| 99169_at   | 333.7   | 568.6   | 469.8   | 376.3   | 474.8   | 493.4   | 482.3   | 470.6  | 0.46998842  | 437.1     | 480.275  | 43.175   | 0.910103586 | 0.3698   | 1.122  |
| 99171_at   | 46.3    | 69.5    | 84.8    | 85.9    | 74.8    | 64.9    | 45.8    | 100.4  | 0.992172937 | 71.625    | 71.475   | 0.15     | 1.002098636 | 0.9574   | -1.012 |
| 99172_at   | 78.3    | 45.1    | 64.1    | 80.6    | 38.7    | 42.7    | 44.8    | 28.9   | 0.032760494 | 67.025    | 38.775   | 28.25    | 1.728562218 | 0.01796  | -1.71  |
| 99175_at   | 1878.4  | 1641.9  | 1748.4  | 1782    | 1896    | 1634.5  | 1834.9  | 1920.3 | 0.498318949 | 1762.675  | 1821.425 | 58.75    | 0.967745035 | 0.5134   | -1.032 |
| 99176_at   | 911.4   | 829     | 877.3   | 722.5   | 770.5   | 854.9   | 786     | 703.6  | 0.319644319 | 835.05    | 778.75   | 56.3     | 1.072295345 | 0.3308   | -1.071 |
| 99178_at   | 518.7   | 443.4   | 470     | 574.4   | 384.3   | 656.9   | 580.4   | 389.6  | 0.988167221 | 501.625   | 502.8    | 1.175    | 0.997663087 | 0.8922   | -1.021 |
| 99179_at   | 615     | 638.3   | 564.8   | 622.6   | 617     | 444     | 417.4   | 655.1  | 0.294363219 | 610.175   | 533.375  | 76.8     | 1.143988751 | 0.2391   | -1.165 |
| 99180_at   | 3099.9  | 2149.3  | 2498.5  | 2936.7  | 1468.6  | 2393.1  | 2187.9  | 2990.8 | 0.326971369 | 2671.1    | 2260.1   | 411      | 1.181850361 | 0.3101   | -1.207 |
| 99182_at   | 680.2   | 552.5   | 593.3   | 558.4   | 398.1   | 430.4   | 404.9   | 613.7  | 0.074078245 | 596.1     | 461.775  | 134.325  | 1.29088842  | 0.05415  | -1.308 |
| 99183_at   | 1347.5  | 1323.9  | 1272.9  | 1113.4  | 1087    | 1323.6  | 1227.9  | 1259.6 | 0.602610079 | 1264.425  | 1224.525 | 39.9     | 1.032584063 | 0.6143   | -1.032 |
| 99184_at   | 342.5   | 534.6   | 563.9   | 476     | 675.7   | 688.9   | 634.7   | 565.3  | 0.037244453 | 479.25    | 641.15   | 161.9    | 0.747484988 | 0.04408  | 1.358  |
| 99185_at   | 623.6   | 593.6   | 696.1   | 446.9   | 1030.4  | 515.7   | 663.8   | 334.5  | 0.784396765 | 590.05    | 636.1    | 46.05    | 0.927605722 | 0.9816   | -1.006 |
| 99186_at   | 1926.4  | 1649.4  | 1945.3  | 1582.3  | 1675.7  | 1691.9  | 1582.4  | 1594.5 | 0.234237959 | 1775.85   | 1636.125 | 139.725  | 1.085399954 | 0.2089   | -1.081 |
| 99187_f_at | 1223.8  | 1114    | 916.3   | 958.2   | 1535.4  | 986.1   | 1077.1  | 971.1  | 0.581643351 | 1053.075  | 1142.425 | 89.35    | 0.921789177 | 0.5996   | -1.072 |
| 99188_at   | 2760.3  | 2464.7  | 2199.2  | 2183    | 3058.8  | 2232.7  | 2395    | 2225   | 0.763097119 | 2401.8    | 2477.875 | 76.075   | 0.96929829  | 0.7818   | -1.027 |
| 99190_at   | 557.1   | 499     | 602.5   | 434.1   | 599     | 372     | 528     | 350.1  | 0.427920496 | 523.175   | 462.275  | 60.9     | 1.131739765 | 0.3781   | -1.153 |
| 99191_at   | 5811    | 5121.2  | 5840    | 5794.1  | 5150.8  | 5569.7  | 4660.3  | 6306.6 | 0.600144882 | 5641.575  | 5421.85  | 219.725  | 1.040525835 | 0.5566   | -1.045 |
| 99194_at   | 403.4   | 411.6   | 356.4   | 424.2   | 404     | 390.4   | 390.1   | 445.1  | 0.681189146 | 398.9     | 407.4    | 8.5      | 0.979135984 | 0.674    | -1.022 |
| 99195_at   | 3       | 34.3    | 4.1     | 6       | 20.4    | 7.1     | 5.1     | 14.7   | 0.997731486 | 11.85     | 11.825   | 0.025    | 1.002114165 | 0.585    | 1.438  |
| 99196_at   | 2198.3  | 1981.2  | 2098.3  | 1913.8  | 1624.6  | 2012.7  | 1924.7  | 1596.6 | 0.089871293 | 2047.9    | 1789.65  | 258.25   | 1.144301958 | 0.08141  | -1.149 |
| 99197_at   | 3.2     | 6.9     | 6       | 3.8     | 7.5     | 5.4     | 6.8     | 9.1    | 0.106450263 | 4.975     | 7.2      | 2.225    | 0.690972222 | 0.108    | 1.495  |
| 99198_at   | 57.6    | 70.4    | 67.3    | 47.3    | 104     | 81      | 65.7    | 58     | 0.213406463 | 60.65     | 77.175   | 16.525   | 0.785876255 | 0.1957   | 1.256  |
| 99236_at   | 11.5    | 40.2    | 7.1     | 10.6    | 13.6    | 5       | 25.5    | 13.2   | 0.744852646 | 17.35     | 14.325   | 3.025    | 1.211169284 | 0.8423   | -1.11  |
| 99237_at   | 8.6     | 6.8     | 8.6     | 1.2     | 0.7     | 8.1     | 2.2     | 1      | 0.228772297 | 6.3       | 3        | 3.3      | 2.1         | 0.2263   | -2.664 |
| 99238_at   | 49.8    | 36.7    | 60.2    | 20.7    | 63.1    | 31.2    | 60.9    | 88.3   | 0.240717968 | 41.85     | 60.875   | 19.025   | 0.687474333 | 0.2736   | 1.468  |
| 99239_at   | 112.6   | 131.7   | 98.1    | 79.7    | 115.6   | 134     | 97.4    | 125.2  | 0.393801406 | 105.525   | 118.05   | 12.525   | 0.893900889 | 0.3736   | 1.129  |
| 99269_g_at | 26.6    | 7.1     | 6.4     | 18.2    | 10.8    | 11.7    | 55.5    | 25.9   | 0.374675515 | 14.575    | 25.975   | 11.4     | 0.561116458 | 0.3503   | 1.692  |
| 99320_at   | 94      | 141.8   | 115     | 138.7   | 152.5   | 173.4   | 32.4    | 35.8   | 0.578762145 | 122.375   | 98.525   | 23.85    | 1.24207054  | 0.3357   | -1.623 |
| 99321_at   | 139.2   | 96.9    | 137.9   | 119.4   | 104.1   | 109     | 83.6    | 85.1   | 0.063407609 | 123.35    | 95.45    | 27.9     | 1.292299633 | 0.05839  | -1.288 |
| 99322_at   | 45.8    | 7       | 81.1    | 49.8    | 37.1    | 50.2    | 52.7    | 35.8   | 0.907391232 | 45.925    | 43.95    | 1.975    | 1.044937429 | 0.6635   | 1.286  |
| 99323_at   | 10.4    | 36.1    | 33.5    | 38.9    | 74.6    | 50.5    | 30.7    | 39     | 0.158349408 | 29.725    | 48.7     | 18.975   | 0.61036961  | 0.1799   | 1.744  |
| 99324_at   | 20.5    | 28      | 19.5    | 22.7    | 42.3    | 28.4    | 27.2    | 29.9   | 0.071143033 | 22.675    | 31.95    | 9.275    | 0.70970266  | 0.0398   | 1.4    |
| 99325_at   | 75.3    | 101.6   | 59.6    | 122.7   | 72.1    | 89.2    | 89.8    | 134.6  | 0.743655032 | 89.8      | 96.425   | 6.625    | 0.931293752 | 0.7034   | -1.086 |
| 99326_at   | 220.5   | 210     | 228.7   | 219     | 261.9   | 199.9   | 268.5   | 273.9  | 0.163928632 | 219.55    | 251.05   | 31.5     | 0.874526987 | 0.1464   | 1.135  |
| 99327_at   | 203.5   | 195.9   | 155.8   | 214.7   | 252.8   | 206.2   | 204     | 222.5  | 0.142061151 | 192.475   | 221.375  | 28.9     | 0.869452287 | 0.1473   | 1.154  |
| 99328_at   | 89.6    | 98.8    | 34.4    | 73.5    | 78.2    | 57.8    | 87.6    | 73.8   | 0.986692446 | 74.075    | 74.35    | 0.275    | 0.996301278 | 0.801    | -1.069 |
| 99329_at   | 284     | 173.7   | 294.5   | 249.7   | 171.2   | 303     | 216.8   | 233.4  | 0.634009458 | 250.475   | 231.1    | 19.375   | 1.083838165 | 0.6477   | -1.084 |
| 99330_at   | 150.1   | 223.7   | 177.4   | 209     | 153     | 294.5   | 252.4   | 163.3  | 0.534425148 | 190.05    | 215.8    | 25.75    | 0.880676552 | 0.6065   | 1.105  |
| 99331_at   | 4.3     | 8.5     | 9.8     | 4.8     | 22.4    | 6.3     | 12      | 6.1    | 0.301755322 | 6.85      | 11.7     | 4.85     | 0.585470085 | 0.2749   | 1.563  |
| 99332_at   | 11.2    | 8       | 9       | 8.1     | 24.2    | 23.3    | 14      | 14.8   | 0.030194272 | 9.075     | 19.075   | 10       | 0.475753604 | 0.004588 | 2.057  |
| 99333_at   | 22.1    | 27.9    | 35.8    | 14.9    | 22.9    | 17.4    | 4.2     | 34     | 0.496233387 | 25.175    | 19.625   | 5.55     | 1.282802548 | 0.4069   | -1.552 |
| 99334_at   | 1.6     | 2.1     | 2.1     | 3.8     | 6.4     | 3.2     | 2.9     | 19.8   | 0.250143053 | 2.4       | 8.075    | 5.675    | 0.297213622 | 0.09365  | 2.58   |
| 99335_at   | 13152.6 | 14442.9 | 11777.3 | 10552.2 | 12864.6 | 10387.5 | 12342.1 | 8464.2 | 0.306972198 | 12481.25  | 11014.6  | 1466.65  | 1.133155085 | 0.3048   | -1.14  |
| 99336_at   | 14991.3 | 14325.9 | 15460.4 | 13158.5 | 23001.7 | 13084.3 | 16472   | 13572  | 0.43998196  | 14484.025 | 16532.5  | 2048.475 | 0.876094057 | 0.4505   | 1.114  |



|            |         |         |         |         |         |         |         |         |             |           |          |          |             |         |        |
|------------|---------|---------|---------|---------|---------|---------|---------|---------|-------------|-----------|----------|----------|-------------|---------|--------|
| 99337_at   | 103.7   | 98.4    | 86.1    | 101.3   | 147.4   | 96.2    | 126.7   | 121.6   | 0.088044576 | 97.375    | 122.975  | 25.6     | 0.791827607 | 0.06072 | 1.252  |
| 99338_at   | 595.5   | 754.2   | 594.5   | 836.4   | 417.2   | 889.2   | 583.3   | 770.7   | 0.812720419 | 695.15    | 665.1    | 30.05    | 1.045181176 | 0.7108  | -1.076 |
| 99339_r_at | 21.4    | 32.6    | 23.5    | 22.1    | 42      | 30.7    | 36.7    | 38.5    | 0.014106092 | 24.9      | 36.975   | 12.075   | 0.673427992 | 0.01366 | 1.498  |
| 99340_at   | 16231.3 | 17613.8 | 16131.5 | 15141.7 | 22199.6 | 14325.5 | 16735.8 | 16396.9 | 0.557707935 | 16279.575 | 17414.45 | 1134.875 | 0.934831419 | 0.5869  | -1.057 |
| 99341_r_at | 1.6     | 1.5     | 0.9     | 3.2     | 3.1     | 5.7     | 1.2     | 1.4     | 0.410310299 | 1.8       | 2.85     | 1.05     | 0.631578947 | 0.4641  | 1.418  |
| 99342_at   | 11.8    | 9.8     | 9.3     | 7.2     | 13.8    | 11.5    | 7.7     | 11.2    | 0.372716379 | 9.525     | 11.05    | 1.525    | 0.86199095  | 0.4086  | 1.153  |
| 99343_at   | 71.6    | 52.7    | 44.7    | 67.8    | 55.7    | 68      | 58.1    | 63.6    | 0.770660075 | 59.2      | 61.35    | 2.15     | 0.964955175 | 0.6868  | -1.052 |
| 99344_at   | 9.6     | 6.8     | 3.1     | 11.7    | 3.6     | 9       | 21      | 3.2     | 0.773002143 | 7.8       | 9.2      | 1.4      | 0.847826087 | 0.9677  | -1.022 |
| 99345_at   | 311     | 302     | 314.6   | 356.2   | 198.3   | 211.1   | 265.1   | 301.9   | 0.041276729 | 320.95    | 244.1    | 76.85    | 1.314829988 | 0.03397 | -1.331 |
| 99346_at   | 7.4     | 4.9     | 9       | 9.1     | 8.4     | 7.7     | 5.8     | 3.5     | 0.428648935 | 7.6       | 6.35     | 1.25     | 1.196850394 | 0.4453  | -1.22  |
| 99347_f_at | 93.5    | 134.3   | 122.9   | 113.5   | 51      | 84.9    | 47.9    | 111.4   | 0.061584099 | 116.05    | 73.8     | 42.25    | 1.572493225 | 0.05901 | -1.66  |
| 99348_r_at | 11.1    | 7.8     | 15.7    | 7.5     | 17.2    | 10.1    | 9.2     | 12.5    | 0.534341257 | 10.525    | 12.25    | 1.725    | 0.859183673 | 0.4791  | 1.182  |
| 99349_at   | 8.8     | 7.6     | 22.8    | 19.6    | 21.9    | 21.3    | 35.5    | 3.3     | 0.482687043 | 14.7      | 20.5     | 5.8      | 0.717073171 | 0.8095  | 1.162  |
| 99350_at   | 124.2   | 131.2   | 148.5   | 177.6   | 108     | 145.5   | 134.5   | 125.5   | 0.285519779 | 145.375   | 128.375  | 17       | 1.132424537 | 0.2804  | -1.128 |
| 99351_at   | 39.4    | 49.5    | 48.6    | 37.8    | 59.4    | 28.7    | 35.5    | 28.8    | 0.507882928 | 43.825    | 38.1     | 5.725    | 1.150262467 | 0.3654  | -1.198 |
| 99354_s_at | 20.4    | 38.5    | 40      | 45.6    | 60.6    | 42.1    | 10.4    | 33.1    | 0.972734001 | 36.125    | 36.55    | 0.425    | 0.988372093 | 0.7804  | -1.13  |
| 99355_r_at | 6.4     | 6.4     | 6.6     | 8.3     | 15.1    | 12.3    | 8.6     | 1.9     | 0.439806619 | 6.925     | 9.475    | 2.55     | 0.730870712 | 0.8759  | -1.08  |
| 99356_r_at | 47.1    | 71.6    | 49.9    | 26.1    | 49.5    | 48.4    | 53.8    | 66.7    | 0.591568184 | 48.675    | 54.6     | 5.925    | 0.891483516 | 0.4789  | 1.182  |
| 99357_at   | 4.4     | 1.8     | 3.5     | 7.2     | 8.1     | 3       | 6.8     | 5.8     | 0.318864398 | 4.225     | 5.925    | 1.7      | 0.713080169 | 0.3101  | 1.488  |
| 99358_at   | 31.8    | 9.5     | 13.6    | 7.8     | 12.4    | 25.7    | 37.4    | 15.8    | 0.398626293 | 15.675    | 22.825   | 7.15     | 0.686746988 | 0.307   | 1.557  |
| 99359_at   | 8.2     | 4.1     | 12.5    | 8.8     | 6.5     | 3.8     | 6.4     | 3.8     | 0.154421303 | 8.4       | 5.125    | 3.275    | 1.63902439  | 0.1603  | -1.567 |
| 99360_at   | 123.4   | 130.8   | 111.4   | 132.3   | 27.3    | 136.2   | 115.4   | 118.2   | 0.38110862  | 124.475   | 99.275   | 25.2     | 1.253840342 | 0.3485  | -1.472 |
| 99361_at   | 15.1    | 18.6    | 22.8    | 16.4    | 29.4    | 18.9    | 23.8    | 19      | 0.187392441 | 18.225    | 22.775   | 4.55     | 0.800219539 | 0.1632  | 1.246  |
| 99362_at   | 23.8    | 24.4    | 23.7    | 43.3    | 14.1    | 42.3    | 60.5    | 28.3    | 0.530876789 | 28.8      | 36.3     | 7.5      | 0.79338843  | 0.7089  | 1.145  |
| 99363_at   | 7.2     | 15.1    | 10.6    | 6       | 20.6    | 12.1    | 8.3     | 27.6    | 0.191287264 | 9.725     | 17.15    | 7.425    | 0.567055394 | 0.1719  | 1.692  |
| 99364_at   | 84.1    | 136.2   | 103.2   | 140.4   | 92.3    | 131.1   | 124.7   | 138.4   | 0.750285299 | 115.975   | 121.625  | 5.65     | 0.953545735 | 0.7174  | -1.059 |
| 99365_at   | 534.1   | 418.3   | 380.5   | 509.6   | 379.8   | 452.9   | 381.2   | 384     | 0.201219793 | 460.625   | 399.475  | 61.15    | 1.153075912 | 0.1871  | -1.145 |
| 99366_at   | 283.3   | 204.8   | 306.2   | 266.8   | 269.8   | 310.2   | 258.2   | 239.4   | 0.881488895 | 265.275   | 269.4    | 4.125    | 0.984688196 | 0.8386  | -1.022 |
| 99367_at   | 191.3   | 176.2   | 112.3   | 116.1   | 42.7    | 224     | 39.5    | 77.8    | 0.328755232 | 148.975   | 96       | 52.975   | 1.551822917 | 0.1615  | -1.967 |
| 99368_at   | 14.6    | 11.6    | 13      | 16.3    | 12.4    | 14.6    | 22.9    | 13.4    | 0.49557437  | 13.875    | 15.825   | 1.95     | 0.876777251 | 0.5009  | -1.118 |
| 99369_f_at | 5       | 6       | 7.2     | 5.9     | 27.9    | 3       | 5.6     | 4.7     | 0.521117953 | 6.025     | 10.3     | 4.275    | 0.584951456 | 0.7958  | 1.142  |
| 99370_at   | 122.8   | 56.8    | 73.7    | 106     | 73      | 72.7    | 78.4    | 117.7   | 0.821674527 | 89.825    | 85.45    | 4.375    | 1.051199532 | 0.9029  | -1.027 |
| 99371_at   | 64.6    | 29.5    | 83.4    | 36.6    | 37.7    | 14.3    | 94      | 32.5    | 0.69159381  | 53.525    | 44.625   | 8.9      | 1.199439776 | 0.5147  | -1.37  |
| 99372_at   | 564.8   | 412.1   | 613.7   | 611.7   | 417.1   | 630.4   | 514.9   | 589.5   | 0.85646542  | 550.575   | 537.975  | 12.6     | 1.023421163 | 0.8684  | -1.023 |
| 99373_at   | 18.9    | 15.6    | 11.8    | 11.8    | 18.9    | 8.8     | 12      | 28.7    | 0.615496889 | 14.525    | 17.1     | 2.575    | 0.849415205 | 0.7796  | -1.086 |
| 99374_at   | 3.6     | 38.1    | 23      | 22.4    | 31.8    | 19.3    | 22      | 40.2    | 0.475557045 | 21.775    | 28.325   | 6.55     | 0.768755516 | 0.3854  | 1.666  |
| 99375_at   | 51.9    | 74.1    | 94.7    | 83.9    | 62.9    | 94.7    | 117.8   | 64.8    | 0.59998563  | 76.15     | 85.05    | 8.9      | 0.895355673 | 0.6367  | 1.105  |
| 99376_at   | 10.7    | 3.3     | 10.6    | 7.9     | 5.6     | 8       | 7.8     | 3.4     | 0.389148012 | 8.125     | 6.2      | 1.925    | 1.310483871 | 0.5108  | -1.268 |
| 99377_at   | 6.4     | 8.1     | 2.2     | 9.5     | 1.6     | 4.2     | 5       | 5.5     | 0.232642872 | 6.55      | 4.075    | 2.475    | 1.607361963 | 0.344   | -1.569 |
| 99378_f_at | 173.9   | 181.4   | 232.3   | 155.5   | 195.7   | 328.4   | 238.1   | 182.6   | 0.236377804 | 185.775   | 236.2    | 50.425   | 0.786515665 | 0.202   | 1.251  |
| 99379_f_at | 135.2   | 162.5   | 159.6   | 176.5   | 195     | 225.6   | 169.5   | 199.6   | 0.037590778 | 158.45    | 197.425  | 38.975   | 0.802583259 | 0.03518 | 1.245  |
| 99380_at   | 61.3    | 16.5    | 29.3    | 93.6    | 17      | 32.2    | 62.3    | 69.3    | 0.823423668 | 50.175    | 45.2     | 4.975    | 1.110066372 | 0.9379  | -1.042 |
| 99381_at   | 22.8    | 21      | 29.9    | 27.7    | 36.1    | 27      | 34.5    | 26.6    | 0.12965813  | 25.35     | 31.05    | 5.7      | 0.816425121 | 0.1239  | 1.227  |
| 99382_at   | 88.4    | 106.6   | 102.5   | 117.5   | 99.9    | 134.7   | 107.9   | 142.4   | 0.203406262 | 103.75    | 121.225  | 17.475   | 0.855846566 | 0.1986  | 1.162  |
| 99383_at   | 54.7    | 33.9    | 72.2    | 31.4    | 58.2    | 27.7    | 43.6    | 51.4    | 0.81709212  | 48.05     | 45.225   | 2.825    | 1.062465451 | 0.8853  | -1.039 |
| 99384_at   | 70.7    | 129.8   | 86.3    | 177.6   | 158.4   | 137.1   | 145.9   | 144.2   | 0.297745234 | 116.1     | 146.4    | 30.3     | 0.793032787 | 0.2074  | 1.343  |
| 99385_at   | 93.4    | 81.3    | 101.8   | 72.5    | 20.4    | 56.2    | 78.1    | 49      | 0.047407212 | 87.25     | 50.925   | 36.325   | 1.713303878 | 0.07489 | -1.89  |
| 99386_at   | 7.2     | 7.8     | 3.8     | 2.3     | 2.2     | 3.2     | 3.5     | 3.5     | 0.199632893 | 5.275     | 3.1      | 2.175    | 1.701612903 | 0.2238  | -1.526 |
| 99387_at   | 17      | 43.3    | 12.1    | 37.1    | 10.4    | 45      | 50      | 54.9    | 0.356107981 | 27.375    | 40.075   | 12.7     | 0.683094198 | 0.5211  | 1.405  |
| 99388_at   | 69.3    | 113.2   | 119.9   | 122.6   | 123.4   | 136.9   | 94.5    | 110.8   | 0.536685203 | 106.25    | 116.4    | 10.15    | 0.912800687 | 0.521   | 1.113  |
| 99389_at   | 167     | 136.4   | 147.5   | 155.4   | 170.9   | 125.1   | 184.4   | 191     | 0.370496358 | 151.575   | 167.85   | 16.275   | 0.903038427 | 0.4195  | -1.096 |
| 99390_at   | 382.4   | 561.6   | 404.9   | 659.7   | 312.2   | 652.3   | 226.7   | 695.4   | 0.831350882 | 502.15    | 471.65   | 30.5     | 1.064666596 | 0.6518  | -1.156 |
| 99391_at   | 72.8    | 91.8    | 72.2    | 16      | 80.6    | 49.4    | 64.4    | 33.3    | 0.757727528 | 63.2      | 56.925   | 6.275    | 1.110232762 | 0.9557  | -1.026 |
| 99392_at   | 10.7    | 15.2    | 11.3    | 8.7     | 3.7     | 7.2     | 8       | 6.3     | 0.02373222  | 11.475    | 6.3      | 5.175    | 1.821428571 | 0.02325 | -1.859 |
| 99393_at   | 95.2    | 40.2    | 87.8    | 111.8   | 61      | 85      | 111.2   | 56.4    | 0.797074702 | 83.75     | 78.4     | 5.35     | 1.068239796 | 0.9005  | -1.037 |
| 99394_at   | 25      | 74.4    | 74.5    | 100.5   | 72.1    | 53.5    | 29      | 143     | 0.849940785 | 68.6      | 74.4     | 5.8      | 0.922043011 | 0.9416  | -1.035 |



|            |        |        |       |        |        |        |        |        |             |          |          |        |             |          |        |
|------------|--------|--------|-------|--------|--------|--------|--------|--------|-------------|----------|----------|--------|-------------|----------|--------|
| 99395_at   | 14.7   | 8.7    | 45.1  | 30.2   | 19.1   | 40.2   | 34.3   | 11.6   | 0.882498294 | 24.675   | 26.3     | 1.625  | 0.938212928 | 0.7716   | 1.151  |
| 99396_at   | 16.1   | 14     | 10.4  | 22.6   | 12.9   | 16.9   | 15.4   | 26.3   | 0.609022076 | 15.775   | 17.875   | 2.1    | 0.882517483 | 0.5809   | 1.138  |
| 99397_at   | 210.1  | 210.2  | 242.6 | 277    | 242.1  | 216.2  | 224.1  | 259.7  | 0.977663514 | 234.975  | 235.525  | 0.55   | 0.997664791 | 0.9367   | -1.006 |
| 99398_at   | 4.8    | 1.9    | 10    | 8.8    | 8.4    | 6.8    | 3      | 7.4    | 0.99137865  | 6.375    | 6.4      | 0.025  | 0.99609375  | 0.8082   | 1.118  |
| 99399_at   | 171.5  | 132.7  | 214.4 | 151.5  | 148.2  | 171    | 180    | 216.9  | 0.629828731 | 167.525  | 179.025  | 11.5   | 0.935763162 | 0.5918   | -1.076 |
| 99400_at   | 7      | 5.2    | 33.9  | 8.2    | 7.4    | 11     | 7.6    | 6.8    | 0.489034199 | 13.575   | 8.2      | 5.375  | 1.655487805 | 0.6224   | -1.25  |
| 99401_at   | 17     | 28.7   | 29    | 33.9   | 3.6    | 19.7   | 7      | 14.6   | 0.020720545 | 27.15    | 11.225   | 15.925 | 2.418708241 | 0.043    | -2.839 |
| 99402_at   | 24.7   | 9.3    | 1.8   | 1.8    | 4.1    | 9.5    | 3.2    | 7.4    | 0.586346429 | 9.4      | 6.05     | 3.35   | 1.553719008 | 0.9494   | -1.047 |
| 99403_at   | 2.4    | 2.1    | 1.6   | 3      | 7      | 2.5    | 4      | 2.3    | 0.221663978 | 2.275    | 3.95     | 1.675  | 0.575949367 | 0.1434   | 1.612  |
| 99404_at   | 4.1    | 33.5   | 20.5  | 3.3    | 8.8    | 18.5   | 7.3    | 17.4   | 0.77808106  | 15.35    | 13       | 2.35   | 1.180769231 | 0.7508   | 1.232  |
| 99405_at   | 55.2   | 66.6   | 57.2  | 62.9   | 52.9   | 55     | 63.3   | 79.1   | 0.762280892 | 60.475   | 62.575   | 2.1    | 0.966440272 | 0.8232   | -1.024 |
| 99406_at   | 74.6   | 22.3   | 31.8  | 64     | 37.2   | 21.3   | 68.8   | 50.2   | 0.821348076 | 48.175   | 44.375   | 3.8    | 1.085633803 | 0.8928   | -1.055 |
| 99407_at   | 85.4   | 34.9   | 61.7  | 22.4   | 74.8   | 19.4   | 59.5   | 31.4   | 0.807561216 | 51.1     | 46.275   | 4.825  | 1.104267963 | 0.8139   | -1.111 |
| 99408_at   | 23.1   | 24.7   | 29.6  | 115.3  | 45     | 122.5  | 98.1   | 35.6   | 0.410369788 | 48.175   | 75.3     | 27.125 | 0.639774236 | 0.2801   | 1.774  |
| 99409_at   | 39.7   | 114.1  | 50.2  | 57.2   | 110.1  | 43.7   | 55     | 61.4   | 0.922567341 | 65.3     | 67.55    | 2.25   | 0.96669134  | 0.859    | -1.057 |
| 99410_at   | 77.5   | 63     | 76.2  | 65.2   | 61.4   | 105.9  | 87.6   | 87.2   | 0.202785593 | 70.475   | 85.525   | 15.05  | 0.824028062 | 0.2038   | 1.196  |
| 99411_at   | 121.2  | 102.9  | 191.6 | 115.7  | 161.6  | 152.2  | 126    | 167    | 0.436391645 | 132.85   | 151.7    | 18.85  | 0.875741595 | 0.3366   | 1.17   |
| 99412_at   | 36.6   | 12.1   | 13.8  | 26.4   | 9.6    | 16.9   | 8.3    | 37.3   | 0.651562896 | 22.225   | 18.025   | 4.2    | 1.233009709 | 0.5234   | -1.34  |
| 99413_at   | 85.8   | 60     | 54.8  | 71.2   | 77.8   | 50.1   | 44.6   | 69.8   | 0.507548157 | 67.95    | 60.575   | 7.375  | 1.121749897 | 0.4748   | -1.134 |
| 99414_at   | 15     | 59.7   | 84.4  | 12.8   | 70.7   | 64.1   | 34.4   | 83.9   | 0.366713119 | 42.975   | 63.275   | 20.3   | 0.67917819  | 0.2538   | 1.917  |
| 99415_at   | 179.6  | 234.8  | 262.5 | 215.2  | 209.8  | 233.7  | 215.5  | 224    | 0.907247118 | 223.025  | 220.75   | 2.275  | 1.010305776 | 0.984    | -1.002 |
| 99416_at   | 23.3   | 97.7   | 71.6  | 11.6   | 105.4  | 67.7   | 45.8   | 56     | 0.495189937 | 51.05    | 68.725   | 17.675 | 0.742815569 | 0.3219   | 1.763  |
| 99417_at   | 26.4   | 66.5   | 31.3  | 31.6   | 22.2   | 74.2   | 23.2   | 39.6   | 0.957536283 | 38.95    | 39.8     | 0.85   | 0.978643216 | 0.9292   | -1.033 |
| 99418_at   | 113.6  | 139.9  | 115.8 | 132.4  | 127.6  | 189.2  | 153.8  | 160.4  | 0.078195417 | 125.425  | 157.75   | 32.325 | 0.795087163 | 0.05814  | 1.25   |
| 99419_g_at | 32.8   | 40.4   | 36    | 42.3   | 53.9   | 9      | 10     | 30.4   | 0.339980078 | 37.875   | 25.825   | 12.05  | 1.46660213  | 0.1871   | -1.923 |
| 99420_at   | 22.4   | 27.4   | 21.8  | 43.3   | 18.3   | 21.7   | 21.5   | 22.5   | 0.22159814  | 28.725   | 21       | 7.725  | 1.367857143 | 0.1463   | -1.317 |
| 99421_at   | 441.9  | 428.6  | 503.3 | 446.4  | 602    | 498    | 510.6  | 456.5  | 0.141609656 | 455.05   | 516.775  | 61.725 | 0.880557303 | 0.117    | 1.132  |
| 99422_at   | 56.6   | 59.8   | 93.8  | 30.5   | 69.2   | 47.8   | 25.2   | 61.7   | 0.592136595 | 60.175   | 50.975   | 9.2    | 1.180480628 | 0.6419   | -1.171 |
| 99423_at   | 17.2   | 20.5   | 16.7  | 7.9    | 19.6   | 9.5    | 10.1   | 10.8   | 0.425714892 | 15.575   | 12.5     | 3.075  | 1.246       | 0.4726   | -1.231 |
| 99424_at   | 9.1    | 9.2    | 11.5  | 12.4   | 8.4    | 9.2    | 11.8   | 12.6   | 0.970734954 | 10.55    | 10.5     | 0.05   | 1.004761905 | 0.9496   | -1.008 |
| 99425_at   | 157.4  | 58.6   | 88.4  | 151.2  | 34.4   | 103.5  | 40.1   | 50.9   | 0.104762924 | 113.9    | 57.225   | 56.675 | 1.990388816 | 0.08196  | -2.03  |
| 99426_at   | 419.7  | 578.3  | 532   | 398.3  | 528.5  | 619.9  | 434.4  | 529.3  | 0.4562698   | 482.075  | 528.025  | 45.95  | 0.912977605 | 0.4425   | 1.1    |
| 99427_at   | 5.6    | 7.6    | 7.9   | 7.1    | 5.1    | 4.3    | 4.5    | 6.1    | 0.021299516 | 7.05     | 5        | 2.05   | 1.41        | 0.01881  | -1.419 |
| 99428_at   | 106.2  | 110.2  | 144.5 | 153.9  | 213.6  | 146.1  | 102.6  | 163.4  | 0.338227979 | 128.7    | 156.425  | 27.725 | 0.82275851  | 0.3659   | 1.191  |
| 99429_at   | 96.7   | 76.1   | 67.1  | 100.7  | 68.9   | 16.1   | 110.9  | 41.6   | 0.304174843 | 85.15    | 59.375   | 25.775 | 1.434105263 | 0.2285   | -1.767 |
| 99430_at   | 38     | 32.7   | 37.6  | 41.8   | 51.2   | 38.9   | 93.9   | 145.8  | 0.159981148 | 37.525   | 82.45    | 44.925 | 0.455124318 | 0.07178  | 1.933  |
| 99431_at   | 82.7   | 116.1  | 85.3  | 101.2  | 136.6  | 137.1  | 182.8  | 97.5   | 0.089319822 | 96.325   | 138.5    | 42.175 | 0.695487365 | 0.06032  | 1.417  |
| 99432_at   | 31.2   | 45.2   | 56.3  | 42.5   | 75.6   | 77.4   | 47     | 15.8   | 0.547809665 | 43.8     | 53.95    | 10.15  | 0.811862836 | 0.8782   | -1.065 |
| 99433_at   | 2.1    | 5.8    | 2.2   | 3.3    | 2      | 6.5    | 1.7    | 2.3    | 0.879808348 | 3.35     | 3.125    | 0.225  | 1.072       | 0.7375   | -1.143 |
| 99434_at   | 33.4   | 75.9   | 45.3  | 67.3   | 55.6   | 41.1   | 16.3   | 53.9   | 0.342619529 | 55.475   | 41.725   | 13.75  | 1.329538646 | 0.3646   | -1.4   |
| 99435_at   | 77     | 65     | 85.4  | 75.1   | 47.2   | 105.4  | 59.5   | 89     | 0.981349351 | 75.625   | 75.275   | 0.35   | 1.004649618 | 0.8037   | -1.051 |
| 99436_at   | 65.9   | 31.7   | 45.5  | 25.4   | 39.3   | 23.3   | 32.1   | 25.6   | 0.281318852 | 42.125   | 30.075   | 12.05  | 1.400665004 | 0.2698   | -1.339 |
| 99437_at   | 10.5   | 11.9   | 35.5  | 9.4    | 42.4   | 21     | 51.8   | 38.2   | 0.053446701 | 16.825   | 38.35    | 21.525 | 0.438722295 | 0.04219  | 2.547  |
| 99438_at   | 45.4   | 48.6   | 68.1  | 126.8  | 29.7   | 20.6   | 65.9   | 65.2   | 0.280952044 | 72.225   | 45.35    | 26.875 | 1.59261301  | 0.2339   | -1.64  |
| 99439_at   | 172.8  | 188.8  | 178.4 | 194.6  | 187.2  | 227.7  | 216.9  | 202.6  | 0.059122876 | 183.65   | 208.6    | 24.95  | 0.880393097 | 0.04676  | 1.134  |
| 99440_at   | 951.4  | 1287.1 | 893.3 | 1225.3 | 941.7  | 1167.1 | 1090.3 | 1341.4 | 0.733693892 | 1089.275 | 1135.125 | 45.85  | 0.959607973 | 0.7108   | -1.046 |
| 99441_at   | 240.8  | 268.7  | 271.1 | 249.2  | 191.4  | 207.9  | 198.1  | 277.7  | 0.146570181 | 257.45   | 218.775  | 38.675 | 1.176779797 | 0.1026   | -1.189 |
| 99442_at   | 56.3   | 40.4   | 47.4  | 34.9   | 64.8   | 33.7   | 68.9   | 50.8   | 0.337324949 | 44.75    | 54.55    | 9.8    | 0.820348304 | 0.3915   | 1.194  |
| 99444_at   | 1034.7 | 963.5  | 1078  | 889.5  | 1005.7 | 1213.5 | 1170.5 | 1206.4 | 0.049725002 | 991.425  | 1149.025 | 157.6  | 0.862840234 | 0.05258  | 1.159  |
| 99445_at   | 829.6  | 839.4  | 841.8 | 1097   | 663.1  | 861.8  | 844.6  | 1076.9 | 0.71939109  | 901.95   | 861.6    | 40.35  | 1.046831476 | 0.6729   | -1.055 |
| 99446_at   | 44.1   | 33.3   | 96.4  | 15.1   | 66.5   | 18.9   | 14.5   | 44.5   | 0.621345926 | 47.225   | 36.1     | 11.125 | 1.308171745 | 0.6575   | -1.276 |
| 99447_at   | 234.8  | 364.6  | 419.5 | 396.1  | 259    | 425.9  | 287.3  | 220.9  | 0.396753386 | 353.75   | 298.275  | 55.475 | 1.185986087 | 0.3916   | -1.194 |
| 99448_at   | 760.7  | 979.8  | 874.3 | 859.9  | 876.5  | 810.8  | 912.5  | 870.3  | 0.982524322 | 868.675  | 867.525  | 1.15   | 1.00132561  | 0.9772   | -1.002 |
| 99449_at   | 18.8   | 26.7   | 26.6  | 35.3   | 122.3  | 71.2   | 40.2   | 112.6  | 0.049454226 | 26.85    | 86.575   | 59.725 | 0.31013572  | 0.008335 | 3.025  |
| 99450_at   | 59.2   | 54.2   | 40.1  | 65.7   | 48.7   | 63.3   | 42.3   | 60.1   | 0.875190116 | 54.8     | 53.6     | 1.2    | 1.02238806  | 0.8962   | -1.019 |
| 99451_at   | 509.4  | 618    | 563.6 | 663.8  | 458.5  | 533.5  | 634.1  | 537.6  | 0.368539844 | 588.7    | 540.925  | 47.775 | 1.088320932 | 0.3627   | -1.09  |



|            |        |        |        |        |        |        |        |        |             |          |          |         |             |         |        |
|------------|--------|--------|--------|--------|--------|--------|--------|--------|-------------|----------|----------|---------|-------------|---------|--------|
| 99452_at   | 1084.3 | 2034.5 | 1547   | 1596.5 | 1778.4 | 1687.7 | 2020.1 | 1282.4 | 0.62841887  | 1565.575 | 1692.15  | 126.575 | 0.925198712 | 0.6012  | -1.093 |
| 99453_at   | 4.6    | 14.4   | 26.7   | 38.2   | 30.1   | 24.8   | 26.2   | 34.9   | 0.359941745 | 20.975   | 29       | 8.025   | 0.723275862 | 0.2653  | 1.781  |
| 99455_s_at | 34.5   | 45.2   | 62.3   | 56.9   | 47.7   | 88.4   | 73.2   | 66.4   | 0.120828507 | 49.725   | 68.925   | 19.2    | 0.721436344 | 0.1263  | 1.388  |
| 99456_at   | 11.6   | 11.6   | 12.5   | 11.6   | 17.1   | 10.7   | 12.6   | 10.3   | 0.62532832  | 11.825   | 12.675   | 0.85    | 0.932938856 | 0.7026  | -1.048 |
| 99457_at   | 2545.1 | 1720.7 | 1811.9 | 2082.8 | 1322.1 | 1669   | 1592   | 1409.7 | 0.053585062 | 2040.125 | 1498.2   | 541.925 | 1.361717394 | 0.02611 | -1.352 |
| 99458_i_at | 1164.6 | 2749.8 | 1358.1 | 1980.8 | 2503.2 | 1670.8 | 2328.2 | 2023.8 | 0.467987647 | 1813.325 | 2131.5   | 318.175 | 0.850727187 | 0.3685  | 1.23   |
| 99459_f_at | 59     | 197.6  | 82.1   | 110.7  | 148.5  | 118    | 134.4  | 100.3  | 0.708490986 | 112.35   | 125.3    | 12.95   | 0.896648045 | 0.4867  | 1.222  |
| 99460_at   | 17.6   | 20.1   | 63.9   | 21.1   | 24.7   | 24.8   | 86.7   | 22     | 0.662797695 | 30.675   | 39.55    | 8.875   | 0.775600506 | 0.631   | 1.25   |
| 99461_at   | 44.2   | 29.7   | 81.8   | 20.1   | 75.7   | 62.9   | 12.4   | 17.1   | 0.929900494 | 43.95    | 42.025   | 1.925   | 1.045806068 | 0.7401  | -1.209 |
| 99462_at   | 441.1  | 510.2  | 458.2  | 442.5  | 583.9  | 380.3  | 431.1  | 539.5  | 0.700628101 | 463      | 483.7    | 20.7    | 0.957204879 | 0.7783  | -1.031 |
| 99463_at   | 42     | 52.8   | 47.1   | 50.9   | 52.3   | 36.9   | 53.1   | 57.9   | 0.73506825  | 48.2     | 50.05    | 1.85    | 0.963036963 | 0.8159  | -1.028 |
| 99464_at   | 728.1  | 612.2  | 466.9  | 680.2  | 376.9  | 650.6  | 765.4  | 710.9  | 0.969826047 | 621.85   | 625.95   | 4.1     | 0.993449956 | 0.9397  | -1.015 |
| 99465_at   | 270.1  | 320.7  | 183.5  | 281.7  | 190.4  | 265.4  | 176.1  | 318.2  | 0.570548315 | 264      | 237.525  | 26.475  | 1.111461951 | 0.5568  | -1.121 |
| 99466_at   | 188.5  | 253.4  | 247.3  | 229.6  | 291.8  | 229.6  | 208.7  | 205.7  | 0.869974971 | 229.7    | 233.95   | 4.25    | 0.981833725 | 0.8937  | -1.015 |
| 99467_at   | 533.6  | 693.2  | 642.9  | 726.3  | 683.5  | 670    | 592.4  | 671.2  | 0.915575177 | 649      | 654.275  | 5.275   | 0.991937641 | 0.8669  | -1.013 |
| 99469_at   | 327.9  | 422.3  | 255.5  | 355.9  | 369.2  | 343.3  | 234.2  | 355.3  | 0.758811974 | 340.4    | 325.5    | 14.9    | 1.04577573  | 0.7756  | -1.045 |
| 99471_at   | 663.5  | 594.3  | 538.4  | 682.5  | 515.9  | 698.2  | 620.1  | 582    | 0.767280162 | 619.675  | 604.05   | 15.625  | 1.025867064 | 0.7553  | -1.028 |
| 99472_at   | 47.8   | 32.2   | 35.4   | 94.3   | 45.6   | 91.5   | 42.6   | 80     | 0.533168588 | 52.425   | 64.925   | 12.5    | 0.807470158 | 0.4442  | 1.29   |
| 99473_at   | 2.7    | 10.3   | 7.3    | 5.2    | 2.8    | 7      | 2.9    | 8.1    | 0.599638623 | 6.375    | 5.2      | 1.175   | 1.225961538 | 0.6321  | -1.223 |
| 99474_at   | 36.9   | 45.1   | 35.7   | 7.1    | 28.1   | 36.4   | 56.1   | 40.6   | 0.408892327 | 31.2     | 40.3     | 9.1     | 0.774193548 | 0.3814  | 1.531  |
| 99475_at   | 4664.6 | 5019.3 | 4459.9 | 5047.6 | 4893.8 | 5193.9 | 4772.7 | 4627.6 | 0.70495926  | 4797.85  | 4872     | 74.15   | 0.984780378 | 0.6978  | -1.016 |
| 99476_at   | 365.2  | 368.1  | 333.3  | 380.4  | 370.9  | 484    | 350.8  | 383.3  | 0.325643607 | 361.75   | 397.25   | 35.5    | 0.91063562  | 0.2978  | -1.091 |
| 99477_at   | 292.4  | 191.2  | 228.4  | 276.2  | 135.8  | 223.6  | 72.6   | 170.4  | 0.052695731 | 247.05   | 150.6    | 96.45   | 1.640438247 | 0.07344 | -1.751 |
| 99478_at   | 201    | 196    | 246.4  | 204.7  | 305.5  | 234.5  | 151    | 212.2  | 0.706745838 | 212.025  | 225.8    | 13.775  | 0.938994686 | 0.8226  | -1.037 |
| 99479_at   | 17     | 63.1   | 80.3   | 40.5   | 84.3   | 68.9   | 47.7   | 96.4   | 0.216397374 | 50.225   | 74.325   | 24.1    | 0.675748402 | 0.2223  | 1.664  |
| 99481_at   | 190.1  | 240.2  | 196.7  | 165.9  | 237.1  | 253.5  | 359.1  | 214.9  | 0.122966937 | 198.225  | 266.15   | 67.925  | 0.744786774 | 0.08069 | 1.328  |
| 99485_at   | 166.9  | 154.1  | 200.1  | 172.7  | 121.7  | 173.2  | 130.8  | 163.7  | 0.152639619 | 173.45   | 147.35   | 26.1    | 1.177129284 | 0.1455  | -1.185 |
| 99486_at   | 310.4  | 449.9  | 395.3  | 283.1  | 456.4  | 381.9  | 359.8  | 306.5  | 0.750615133 | 359.675  | 376.15   | 16.475  | 0.956200984 | 0.7147  | -1.053 |
| 99488_at   | 2.4    | 6.1    | 3.9    | 2.6    | 3.7    | 4.1    | 2.7    | 3.1    | 0.719980474 | 3.75     | 3.4      | 0.35    | 1.102941176 | 0.8802  | -1.037 |
| 99489_at   | 166.2  | 196.3  | 196.7  | 206.6  | 220.3  | 226.6  | 225.9  | 223.6  | 0.031776026 | 191.45   | 224.1    | 32.65   | 0.854306113 | 0.01557 | 1.174  |
| 99490_at   | 355.2  | 511.5  | 392.6  | 462.1  | 387.6  | 390.3  | 469.6  | 545.9  | 0.738185065 | 430.35   | 448.35   | 18      | 0.959852794 | 0.7376  | -1.041 |
| 99491_at   | 903.3  | 900.2  | 1021.5 | 1008.1 | 1099.5 | 1124.7 | 1121.6 | 950    | 0.074432549 | 958.275  | 1073.95  | 115.675 | 0.892290144 | 0.07605 | 1.12   |
| 99492_at   | 293.2  | 326.2  | 313.4  | 363.8  | 307.6  | 302.3  | 333.6  | 387.7  | 0.737411188 | 324.15   | 332.8    | 8.65    | 0.974008413 | 0.7472  | -1.025 |
| 99493_at   | 698.5  | 570.5  | 725.6  | 669.8  | 471.2  | 682.8  | 604    | 660.1  | 0.335344363 | 666.1    | 604.525  | 61.575  | 1.10185683  | 0.3387  | -1.108 |
| 99494_at   | 300.9  | 276.9  | 277.3  | 271.9  | 284.9  | 355.2  | 321.1  | 291.5  | 0.144833498 | 281.75   | 313.175  | 31.425  | 0.899656741 | 0.1129  | -1.108 |
| 99497_at   | 425    | 445.3  | 587.5  | 469.6  | 460.4  | 518.5  | 417.2  | 532.5  | 0.994929105 | 481.85   | 482.15   | 0.3     | 0.999377787 | 0.9674  | -1.004 |
| 99498_at   | 82.6   | 53.7   | 61     | 95.5   | 112.4  | 82.3   | 71.3   | 85.6   | 0.301638729 | 73.2     | 87.9     | 14.7    | 0.832764505 | 0.2763  | 1.216  |
| 99499_at   | 225.3  | 307.2  | 277.4  | 279.5  | 258.8  | 303    | 287.4  | 240.1  | 0.999137824 | 272.35   | 272.325  | 0.025   | 1.000091802 | 0.9821  | -1.002 |
| 99500_at   | 941    | 919.8  | 930.2  | 1022.5 | 670.1  | 1012.9 | 921    | 1186.9 | 0.962086366 | 953.375  | 947.725  | 5.65    | 1.005961645 | 0.8397  | -1.026 |
| 99501_at   | 453.4  | 296.7  | 427.1  | 463.8  | 268.5  | 386.6  | 311.2  | 268.4  | 0.081500459 | 410.25   | 308.675  | 101.575 | 1.32906779  | 0.08356 | -1.324 |
| 99502_at   | 782.1  | 615.4  | 706.4  | 596.1  | 453.5  | 540.6  | 607    | 633.1  | 0.095233851 | 675      | 558.55   | 116.45  | 1.208486259 | 0.09755 | -1.211 |
| 99503_at   | 450.4  | 616.1  | 589.8  | 739.1  | 569.3  | 576.5  | 768.5  | 565.5  | 0.794125515 | 598.85   | 619.95   | 21.1    | 0.965964997 | 0.756   | -1.042 |
| 99504_at   | 48.9   | 38.8   | 71.6   | 38.4   | 90.6   | 79.9   | 73.1   | 54.5   | 0.060295849 | 49.425   | 74.525   | 25.1    | 0.663200268 | 0.05643 | 1.533  |
| 99505_at   | 1365.4 | 1246.9 | 1466.4 | 1187.9 | 1225.7 | 1256.6 | 1068.9 | 1134.1 | 0.10849454  | 1316.65  | 1171.325 | 145.325 | 1.124068896 | 0.1009  | -1.123 |
| 99506_at   | 275.6  | 246.4  | 271.4  | 231.5  | 221.1  | 252    | 238.3  | 320.1  | 0.948413329 | 256.225  | 257.875  | 1.65    | 0.993601551 | 0.9922  | -1.001 |
| 99507_at   | 14.3   | 13.6   | 20.1   | 7.7    | 10.2   | 13.4   | 39.1   | 30.1   | 0.277028205 | 13.925   | 23.2     | 9.275   | 0.600215517 | 0.3046  | 1.526  |
| 99508_at   | 51.2   | 123.5  | 98.6   | 67.6   | 154.2  | 66.5   | 75.9   | 150.1  | 0.392916645 | 85.225   | 111.675  | 26.45   | 0.763152004 | 0.4224  | 1.29   |
| 99509_s_at | 153.7  | 196.9  | 199.2  | 185.1  | 217.4  | 236.8  | 209.2  | 256.7  | 0.020967439 | 183.725  | 230.025  | 46.3    | 0.798717531 | 0.02379 | 1.255  |
| 99510_at   | 269.8  | 290.2  | 257.6  | 286.8  | 203.4  | 246.5  | 175.9  | 384.7  | 0.650022294 | 276.1    | 252.625  | 23.475  | 1.092924295 | 0.4685  | -1.143 |
| 99511_at   | 27.6   | 51.3   | 47.3   | 41     | 47.3   | 49.1   | 38.6   | 60.5   | 0.343414118 | 41.8     | 48.875   | 7.075   | 0.855242967 | 0.3452  | 1.185  |
| 99512_at   | 2826.2 | 2407.1 | 2573.2 | 2706.5 | 2221.9 | 2534   | 2740   | 2560.6 | 0.447972384 | 2628.25  | 2514.125 | 114.125 | 1.045393527 | 0.4461  | -1.047 |
| 99513_at   | 886.9  | 694.5  | 701    | 864.7  | 634.6  | 759.9  | 632.8  | 639.3  | 0.103686589 | 786.775  | 666.65   | 120.125 | 1.180192005 | 0.08756 | -1.176 |
| 99514_at   | 1462.3 | 2112.8 | 1803.6 | 1684.6 | 2046.1 | 1715.2 | 1846.1 | 1741.4 | 0.665760116 | 1765.825 | 1837.2   | 71.375  | 0.96115012  | 0.6135  | -1.047 |
| 99515_at   | 235.9  | 293.7  | 247.9  | 231.2  | 208.5  | 467.6  | 165.6  | 163.8  | 0.992029236 | 252.175  | 251.375  | 0.8     | 1.003182496 | 0.7023  | -1.107 |
| 99516_at   | 13.8   | 67.4   | 81.3   | 17.5   | 59.3   | 84     | 25     | 35.7   | 0.791465954 | 45       | 51       | 6       | 0.882352941 | 0.5864  | 1.355  |
| 99517_at   | 80.8   | 73.4   | 79.4   | 108.4  | 87.3   | 70.8   | 108.7  | 75     | 0.996684315 | 85.5     | 85.45    | 0.05    | 1.000585138 | 0.9801  | -1.003 |



|            |        |        |        |        |         |        |        |        |             |          |          |          |             |          |        |
|------------|--------|--------|--------|--------|---------|--------|--------|--------|-------------|----------|----------|----------|-------------|----------|--------|
| 99518_at   | 313.4  | 229.6  | 262.8  | 279.6  | 256.8   | 315.5  | 370    | 207.5  | 0.701667378 | 271.35   | 287.45   | 16.1     | 0.943990259 | 0.7838   | -1.041 |
| 99521_at   | 99     | 95     | 136.8  | 136.7  | 110.1   | 147.4  | 96.8   | 136    | 0.739151285 | 116.875  | 122.575  | 5.7      | 0.953497858 | 0.7388   | -1.05  |
| 99522_at   | 49.3   | 59.4   | 35.8   | 50.5   | 64.5    | 69.6   | 55.8   | 56.5   | 0.078012377 | 48.75    | 61.6     | 12.85    | 0.791396104 | 0.08425  | 1.278  |
| 99523_at   | 132.3  | 103.9  | 163    | 157    | 198.8   | 87.5   | 129.3  | 146.4  | 0.958838834 | 139.05   | 140.5    | 1.45     | 0.989679715 | 0.9356   | -1.017 |
| 99524_at   | 745.2  | 847.9  | 684.5  | 671.9  | 661.8   | 905.7  | 730.8  | 884.4  | 0.450496971 | 737.375  | 795.675  | 58.3     | 0.926728878 | 0.4667   | -1.074 |
| 99525_at   | 39.7   | 41.6   | 43.6   | 26.3   | 21.1    | 45.8   | 18.9   | 57.4   | 0.854313113 | 37.8     | 35.8     | 2        | 1.055865922 | 0.6421   | -1.158 |
| 99527_at   | 13     | 13.1   | 12.5   | 25.1   | 12      | 11.5   | 33.5   | 15.4   | 0.733879588 | 15.925   | 18.1     | 2.175    | 0.879834254 | 0.8191   | -1.074 |
| 99528_at   | 600.2  | 745.4  | 626.5  | 783    | 360     | 590    | 367.9  | 481.5  | 0.015360706 | 688.775  | 449.85   | 238.925  | 1.531121485 | 0.01684  | -1.554 |
| 99529_f_at | 206    | 298.7  | 300.7  | 333.5  | 194.5   | 321.2  | 276.2  | 242.2  | 0.519826322 | 284.725  | 258.525  | 26.2     | 1.101344164 | 0.5401   | -1.102 |
| 99530_at   | 51.2   | 36.6   | 14.2   | 11.1   | 9.5     | 55.6   | 13.4   | 13.8   | 0.731698354 | 28.275   | 23.075   | 5.2      | 1.225352113 | 0.6242   | -1.319 |
| 99531_at   | 39.5   | 39.9   | 44.8   | 43.9   | 51.8    | 39.5   | 42.4   | 43.3   | 0.49148957  | 42.025   | 44.25    | 2.225    | 0.949717514 | 0.4909   | -1.05  |
| 99532_at   | 727.5  | 1297.6 | 844.8  | 1052.7 | 1420    | 1192.3 | 1215.9 | 1176.1 | 0.117534532 | 980.65   | 1251.075 | 270.425  | 0.783845893 | 0.0956   | 1.303  |
| 99534_at   | 9.1    | 7.7    | 10.8   | 9      | 10.6    | 10.8   | 9.6    | 8.4    | 0.437527298 | 9.15     | 9.85     | 0.7      | 0.92893401  | 0.4344   | -1.08  |
| 99535_at   | 306.7  | 475.7  | 346.8  | 372.7  | 278.6   | 364.7  | 296.4  | 317    | 0.19765625  | 375.475  | 314.175  | 61.3     | 1.195114188 | 0.1693   | -1.186 |
| 99536_at   | 178.1  | 246    | 215.5  | 136.8  | 266.6   | 218.9  | 172.6  | 298.9  | 0.261586521 | 194.1    | 239.25   | 45.15    | 0.811285266 | 0.273    | 1.236  |
| 99537_at   | 1655.2 | 1256.8 | 1474   | 1294.2 | 1374.5  | 1420.8 | 1461.5 | 1114.8 | 0.545809791 | 1420.05  | 1342.9   | 77.15    | 1.057450294 | 0.5546   | -1.057 |
| 99541_at   | 810.3  | 769.7  | 909.6  | 738.1  | 635.7   | 605.1  | 639.1  | 499    | 0.005440508 | 806.925  | 594.725  | 212.2    | 1.356803565 | 0.005892 | -1.359 |
| 99542_at   | 48.3   | 58.5   | 48.5   | 71.1   | 53.1    | 44     | 29.5   | 47.2   | 0.124569506 | 56.6     | 43.45    | 13.15    | 1.30264672  | 0.1324   | -1.314 |
| 99543_s_at | 1240.1 | 1485.1 | 1383   | 1216.7 | 1344.8  | 1292.4 | 1315.7 | 1431.7 | 0.840986805 | 1331.225 | 1346.15  | 14.925   | 0.988912825 | 0.801    | -1.014 |
| 99544_at   | 639.7  | 849.3  | 843.1  | 772.7  | 1019.9  | 765    | 811.1  | 755.5  | 0.464857776 | 776.2    | 837.875  | 61.675   | 0.926391168 | 0.4635   | -1.078 |
| 99545_at   | 29.8   | 16.4   | 8.9    | 23.2   | 46.6    | 45.7   | 41.7   | 80.6   | 0.024178768 | 19.575   | 53.65    | 34.075   | 0.364864865 | 0.01238  | 2.903  |
| 99546_at   | 1889.9 | 1584.9 | 1594.8 | 1809.6 | 1507.7  | 1596.9 | 1594.9 | 1527.7 | 0.121107502 | 1719.8   | 1556.8   | 163      | 1.104701953 | 0.08439  | -1.102 |
| 99548_at   | 141.7  | 127.2  | 122    | 160.1  | 133.1   | 98.9   | 143.4  | 94.2   | 0.22758056  | 137.75   | 117.4    | 20.35    | 1.173339012 | 0.209    | -1.186 |
| 99549_at   | 3131.4 | 2035.7 | 2399.9 | 2849.4 | 1991.9  | 3007.9 | 2111.3 | 2568.4 | 0.602588025 | 2604.1   | 2419.875 | 184.225  | 1.076129965 | 0.603    | -1.076 |
| 99551_f_at | 28.2   | 32.3   | 26.1   | 46.4   | 43.3    | 36     | 37.5   | 33.3   | 0.441107952 | 33.25    | 37.525   | 4.275    | 0.886075949 | 0.3451   | 1.152  |
| 99552_at   | 1738.9 | 1670.6 | 1400.6 | 1589.9 | 1859.4  | 1548.6 | 1386.7 | 1859.8 | 0.665656031 | 1600     | 1663.625 | 63.625   | 0.961755203 | 0.7033   | -1.035 |
| 99553_f_at | 94     | 93.3   | 92.7   | 89.1   | 146.2   | 118    | 71.7   | 124.4  | 0.241662605 | 92.275   | 115.075  | 22.8     | 0.801868347 | 0.2677   | 1.207  |
| 99555_at   | 15.7   | 12.2   | 13.3   | 1.5    | 18.9    | 20.5   | 17.1   | 15.7   | 0.096398203 | 10.675   | 18.05    | 7.375    | 0.591412742 | 0.1884   | 2.272  |
| 99556_s_at | 48.5   | 38.2   | 62.7   | 42.9   | 48.2    | 24.8   | 26.2   | 58.7   | 0.424036673 | 48.075   | 39.475   | 8.6      | 1.217859405 | 0.3381   | -1.285 |
| 99557_at   | 24.2   | 30.9   | 31.2   | 75.5   | 13.9    | 89.3   | 20.1   | 26     | 0.887792377 | 40.45    | 37.325   | 3.125    | 1.083724046 | 0.6169   | -1.284 |
| 99558_at   | 380    | 364.4  | 289    | 322.3  | 337.3   | 209.1  | 325.3  | 300.9  | 0.250807496 | 338.925  | 293.15   | 45.775   | 1.156148729 | 0.2609   | -1.169 |
| 99559_at   | 907.1  | 896.1  | 801.4  | 903.8  | 675     | 709.5  | 779.3  | 587.2  | 0.009955424 | 877.1    | 687.75   | 189.35   | 1.275318066 | 0.009646 | -1.28  |
| 99561_f_at | 23.5   | 34.3   | 11.8   | 12.2   | 57.2    | 27.1   | 17.4   | 56.3   | 0.163736853 | 20.45    | 39.5     | 19.05    | 0.517721519 | 0.1514   | 1.903  |
| 99562_at   | 633    | 705.7  | 594.5  | 793.4  | 925.2   | 836.6  | 1142.9 | 1049.7 | 0.01178026  | 681.65   | 988.6    | 306.95   | 0.689510419 | 0.007429 | 1.449  |
| 99563_at   | 2854.4 | 3113.2 | 3300.4 | 3155.4 | 2364.1  | 2506.2 | 3007.7 | 2997   | 0.101376853 | 3105.85  | 2718.75  | 387.1    | 1.142381609 | 0.09275  | -1.147 |
| 99564_at   | 1277.2 | 1182.7 | 1078   | 1106.3 | 860.2   | 837.5  | 1373.3 | 1074.5 | 0.401905474 | 1161.05  | 1036.375 | 124.675  | 1.12029912  | 0.3184   | -1.141 |
| 99566_at   | 4111.1 | 3985.5 | 3728.8 | 4065.5 | 3980.8  | 3783.1 | 3470.7 | 4122.7 | 0.456064728 | 3972.725 | 3839.325 | 133.4    | 1.034745691 | 0.4432   | -1.036 |
| 99567_at   | 1.3    | 3.2    | 3.4    | 1.8    | 3.3     | 3      | 3.4    | 1.1    | 0.725652904 | 2.425    | 2.7      | 0.275    | 0.898148148 | 0.832    | -1.081 |
| 99569_at   | 117.2  | 83.6   | 47.2   | 38.9   | 102.8   | 75.1   | 116.8  | 77     | 0.354559445 | 71.725   | 92.925   | 21.2     | 0.771859026 | 0.2686   | 1.401  |
| 99570_s_at | 187.6  | 286    | 284.3  | 264    | 336.7   | 284.8  | 305.8  | 277.8  | 0.149529569 | 255.475  | 301.275  | 45.8     | 0.847979421 | 0.1567   | 1.193  |
| 99571_at   | 459.3  | 450.7  | 500.9  | 504.4  | 680.5   | 621.2  | 765.3  | 504.6  | 0.053824268 | 478.825  | 642.9    | 164.075  | 0.744789236 | 0.02192  | 1.329  |
| 99574_at   | 755.6  | 998.3  | 870.1  | 1024.3 | 767.1   | 848.4  | 781.3  | 854.4  | 0.211396608 | 912.075  | 812.8    | 99.275   | 1.122139518 | 0.1983   | -1.115 |
| 99575_at   | 873.4  | 1238.3 | 1019.2 | 1057.4 | 801.4   | 1164.5 | 942.8  | 1046.3 | 0.607439583 | 1047.075 | 988.75   | 58.325   | 1.058988622 | 0.6018   | -1.061 |
| 99576_at   | 0.8    | 13.4   | 8.9    | 15.7   | 3       | 1.6    | 2.1    | 4.7    | 0.126617205 | 9.7      | 2.85     | 6.85     | 3.403508772 | 0.278    | -2.385 |
| 99577_at   | 1893.6 | 1815.5 | 2065.7 | 2153.2 | 1206.4  | 1359.7 | 1299.8 | 1044   | 0.000362108 | 1982     | 1227.475 | 754.525  | 1.614696837 | 0.000457 | -1.619 |
| 99578_at   | 1781.7 | 1376.6 | 1470.5 | 1549.6 | 1014    | 1118.5 | 1177.6 | 969.3  | 0.005836611 | 1544.6   | 1069.85  | 474.75   | 1.443753797 | 0.002049 | -1.442 |
| 99579_at   | 5467.5 | 4634.2 | 4638.3 | 4409.3 | 3910.2  | 4674.2 | 4533.2 | 4173.5 | 0.16476026  | 4787.325 | 4322.775 | 464.55   | 1.10746569  | 0.1536   | -1.106 |
| 99580_s_at | 1036.8 | 910.4  | 1152.8 | 1160.6 | 969.6   | 1269   | 1268.4 | 1134.5 | 0.342974988 | 1065.15  | 1160.375 | 95.225   | 0.917936012 | 0.3606   | -1.088 |
| 99581_at   | 9579.9 | 9436.7 | 8977.3 | 8306.3 | 13353.3 | 7679.8 | 9333.4 | 9042.7 | 0.575402896 | 9075.05  | 9852.3   | 777.25   | 0.921109792 | 0.6238   | -1.064 |
| 99582_at   | 61.7   | 35     | 33     | 28.7   | 14.7    | 20.4   | 24.7   | 33     | 0.115459412 | 39.6     | 23.2     | 16.4     | 1.706896552 | 0.06764  | -1.702 |
| 99583_at   | 4332.7 | 4234   | 3789.1 | 3649.1 | 5442    | 3746.1 | 4449.8 | 4128.6 | 0.329346796 | 4001.225 | 4441.625 | 440.4    | 0.9008471   | 0.3183   | -1.102 |
| 99584_at   | 554.9  | 514.7  | 558.8  | 572.6  | 626.3   | 712.1  | 611.3  | 836.9  | 0.062615005 | 550.25   | 696.65   | 146.4    | 0.789851432 | 0.0233   | 1.257  |
| 99585_at   | 226.2  | 245.1  | 244.6  | 253.7  | 290.3   | 214.7  | 298.6  | 258.2  | 0.318438211 | 242.4    | 265.45   | 23.05    | 0.913166321 | 0.3302   | -1.087 |
| 99586_at   | 7860.2 | 7334.2 | 7315.7 | 7485.1 | 12177.2 | 6768.6 | 8579.4 | 7681.5 | 0.352364307 | 7498.8   | 8801.675 | 1302.875 | 0.851974198 | 0.3274   | 1.145  |
| 99587_at   | 1148.3 | 954    | 951.3  | 931.7  | 832.3   | 1174.3 | 862.9  | 616.8  | 0.375050154 | 996.325  | 871.575  | 124.75   | 1.143131687 | 0.3089   | -1.169 |
| 99589_f_at | 11.7   | 8.8    | 8.7    | 5.3    | 18.4    | 11.2   | 11.6   | 13.6   | 0.054887263 | 8.625    | 13.7     | 5.075    | 0.629562044 | 0.05355  | 1.616  |



|            |         |         |        |         |         |         |         |        |             |           |          |          |             |          |        |
|------------|---------|---------|--------|---------|---------|---------|---------|--------|-------------|-----------|----------|----------|-------------|----------|--------|
| 99590_at   | 13599.8 | 13192.1 | 12341  | 12320.6 | 17645.4 | 12076.3 | 14023.1 | 11750  | 0.515243758 | 12863.375 | 13873.7  | 1010.325 | 0.927176961 | 0.5368   | -1.065 |
| 99591_i_at | 370.1   | 462.6   | 600.4  | 556.6   | 728.5   | 457.4   | 654.8   | 416.1  | 0.495807753 | 497.425   | 564.2    | 66.775   | 0.881646579 | 0.5302   | 1.122  |
| 99592_f_at | 1664.4  | 1598.4  | 1379.3 | 1507.5  | 1878.8  | 1525    | 1434.5  | 1534.5 | 0.649688305 | 1537.4    | 1593.2   | 55.8     | 0.964976149 | 0.6629   | -1.033 |
| 99593_at   | 3666.8  | 3217.2  | 2991.1 | 2725    | 4337.3  | 2924.6  | 3725.4  | 2670.6 | 0.56814343  | 3150.025  | 3414.475 | 264.45   | 0.922550319 | 0.6129   | -1.07  |
| 99594_at   | 2323    | 1870.5  | 2020.2 | 1863.5  | 2038    | 1667.1  | 1838.2  | 1688   | 0.177265692 | 2019.3    | 1807.825 | 211.475  | 1.116977584 | 0.1642   | -1.116 |
| 99595_at   | 55.5    | 39.9    | 14.1   | 65.9    | 80.2    | 60.5    | 56.3    | 39.6   | 0.32030809  | 43.85     | 59.15    | 15.3     | 0.741335587 | 0.3106   | 1.513  |
| 99596_f_at | 3858.1  | 7644.3  | 6242.2 | 6622.1  | 7379.4  | 5883.9  | 7206.3  | 5374.5 | 0.710779314 | 6091.675  | 6461.025 | 369.35   | 0.942834148 | 0.6479   | -1.084 |
| 99597_at   | 599.8   | 963.4   | 790.9  | 691.6   | 734.7   | 787.2   | 754.9   | 682.6  | 0.804650327 | 761.425   | 739.85   | 21.575   | 1.029161316 | 0.8932   | -1.015 |
| 99598_g_at | 1316.6  | 2148.2  | 2013.4 | 1906.3  | 1713    | 1925.8  | 2054    | 1691.7 | 1           | 1846.125  | 1846.125 | 0        | 1           | 0.913    | -1.014 |
| 99599_s_at | 4304.7  | 7952    | 5933   | 5149.4  | 7178.4  | 6075.4  | 6623.3  | 5413.3 | 0.60139424  | 5834.775  | 6322.6   | 487.825  | 0.922844241 | 0.5084   | -1.106 |
| 99600_at   | 800.4   | 1325.4  | 917    | 872.2   | 1258.6  | 830.4   | 1065.6  | 1092.8 | 0.594697236 | 978.75    | 1061.85  | 83.1     | 0.921740359 | 0.5456   | -1.094 |
| 99602_at   | 774.4   | 878.5   | 824.4  | 778.7   | 620     | 936.4   | 703.9   | 953.7  | 0.910568733 | 814       | 803.5    | 10.5     | 1.013067828 | 0.8055   | -1.029 |
| 99603_g_at | 586.2   | 635     | 757.8  | 576.4   | 532.5   | 886.6   | 594.1   | 562.3  | 0.958747295 | 638.85    | 643.875  | 5.025    | 0.99219569  | 0.9557   | -1.008 |
| 99604_at   | 1743.3  | 1881.4  | 1691.5 | 1861.7  | 1441.8  | 1746.9  | 1547.6  | 1984.6 | 0.424386874 | 1794.475  | 1680.225 | 114.25   | 1.067996846 | 0.3712   | -1.075 |
| 99605_at   | 2.4     | 8.5     | 6.9    | 1.6     | 38.7    | 6.8     | 5.4     | 4.9    | 0.353907546 | 4.85      | 13.95    | 9.1      | 0.347670251 | 0.2225   | 2.37   |
| 99606_at   | 232.2   | 228.9   | 225.9  | 304.8   | 278.6   | 321.6   | 269.5   | 327.2  | 0.07956264  | 247.95    | 299.225  | 51.275   | 0.828640655 | 0.06911  | 1.212  |
| 99607_at   | 3425    | 3219.3  | 3018.1 | 3218.4  | 3319.2  | 3842.3  | 2964.9  | 4321.8 | 0.282963712 | 3220.2    | 3612.05  | 391.85   | 0.891515898 | 0.2678   | -1.111 |
| 99608_at   | 707.7   | 380.8   | 570    | 533.8   | 670.1   | 631.3   | 522.5   | 688.9  | 0.347608966 | 548.075   | 628.2    | 80.125   | 0.87245304  | 0.32     | 1.167  |
| 99609_at   | 2.3     | 4.3     | 7.4    | 3       | 5.3     | 1.8     | 2.6     | 3.9    | 0.559293093 | 4.25      | 3.4      | 0.85     | 1.25        | 0.6148   | -1.202 |
| 99610_at   | 1837.6  | 1803    | 1789.6 | 1768.8  | 1431.1  | 1652.9  | 1474.5  | 1646.1 | 0.01951303  | 1799.75   | 1551.15  | 248.6    | 1.160268188 | 0.007476 | -1.163 |
| 99613_at   | 637.9   | 470.2   | 437.3  | 643     | 408.1   | 498     | 504.7   | 671.1  | 0.741887334 | 547.1     | 520.475  | 26.625   | 1.051155195 | 0.7357   | -1.052 |
| 99615_at   | 79.8    | 102.1   | 82.4   | 107.7   | 95.2    | 77.7    | 53.9    | 81.8   | 0.204609806 | 93        | 77.15    | 15.85    | 1.20544394  | 0.2125   | -1.219 |
| 99616_s_at | 927.2   | 610.1   | 884.5  | 696.7   | 768.4   | 926.3   | 713     | 563.6  | 0.741130672 | 779.625   | 742.825  | 36.8     | 1.049540605 | 0.7406   | -1.051 |
| 99617_at   | 657.8   | 895.9   | 832.3  | 936.3   | 705.1   | 785.2   | 882.2   | 956.9  | 0.98354418  | 830.575   | 832.35   | 1.775    | 0.997867484 | 0.9676   | -1.004 |
| 99618_at   | 2515.7  | 1858    | 2589.4 | 2246.3  | 3708.2  | 1901.8  | 2922.6  | 1931.7 | 0.538129597 | 2302.35   | 2616.075 | 313.725  | 0.880077979 | 0.6154   | -1.1   |
| 99619_at   | 1256.4  | 981.4   | 1146.6 | 1121    | 948.3   | 985     | 1162.6  | 1366.7 | 0.927252626 | 1126.35   | 1115.65  | 10.7     | 1.009590821 | 0.8725   | -1.017 |
| 99620_at   | 209.5   | 224.4   | 135.6  | 184.7   | 158     | 185     | 148.8   | 139.4  | 0.224444375 | 188.55    | 157.8    | 30.75    | 1.19486692  | 0.2389   | -1.18  |
| 99621_s_at | 830.4   | 989.8   | 814.4  | 1113.9  | 686.3   | 954.1   | 770     | 931.6  | 0.33035782  | 937.125   | 835.5    | 101.625  | 1.121633752 | 0.3284   | -1.122 |
| 99622_at   | 290.9   | 465.1   | 351.8  | 363.7   | 352.6   | 370.8   | 321.3   | 232.8  | 0.34619343  | 367.875   | 319.375  | 48.5     | 1.1518591   | 0.3541   | -1.153 |
| 99623_s_at | 57.3    | 80.3    | 59.5   | 81.3    | 75.1    | 72.4    | 59.4    | 64.3   | 0.818712835 | 69.6      | 67.8     | 1.8      | 1.026548673 | 0.8749   | -1.018 |
| 99624_at   | 1678    | 2683.1  | 1984.3 | 2085.5  | 1984.9  | 2147    | 2208.7  | 2124.5 | 0.970656876 | 2107.725  | 2116.275 | 8.55     | 0.995959882 | 0.8653   | -1.018 |
| 99626_i_at | 9.3     | 25.8    | 8.7    | 14.7    | 23.8    | 23.4    | 8.4     | 3.4    | 0.985427108 | 14.625    | 14.75    | 0.125    | 0.991525424 | 0.7663   | -1.18  |
| 99627_r_at | 31.5    | 38.8    | 28.7   | 79.7    | 46.7    | 35      | 55.4    | 52.9   | 0.83535863  | 44.675    | 47.5     | 2.825    | 0.940526316 | 0.6148   | 1.144  |
| 99628_at   | 3073.9  | 3274.7  | 3197.1 | 2771.1  | 2812.6  | 3692.2  | 3548.8  | 3142.2 | 0.38270304  | 3079.2    | 3298.95  | 219.75   | 0.933387896 | 0.3989   | -1.067 |
| 99629_at   | 1791.5  | 1963.6  | 2017.9 | 2272.9  | 1912.7  | 2106    | 2134    | 2465.3 | 0.383453455 | 2011.475  | 2154.5   | 143.025  | 0.933615688 | 0.379    | -1.071 |
| 99630_at   | 303.5   | 432.9   | 390.5  | 275.9   | 799.9   | 344.9   | 428.7   | 296.1  | 0.391022778 | 350.7     | 467.4    | 116.7    | 0.750320924 | 0.3865   | 1.254  |
| 99631_f_at | 7002.8  | 7913.8  | 7539.8 | 6228.9  | 12148.1 | 7074.8  | 8889.3  | 7097.3 | 0.26936786  | 7171.325  | 8802.375 | 1631.05  | 0.814703418 | 0.2314   | 1.201  |
| 99632_at   | 2404    | 1855.6  | 2068.5 | 1902    | 1823.8  | 1793.2  | 1348.4  | 1099.7 | 0.05038067  | 2057.525  | 1516.275 | 541.25   | 1.356960314 | 0.05444  | -1.379 |
| 99633_at   | 281.1   | 432     | 239.9  | 303.1   | 300.6   | 313.6   | 304.9   | 311    | 0.885538506 | 314.025   | 307.525  | 6.5      | 1.021136493 | 0.9819   | -1.003 |
| 99635_at   | 773.1   | 991     | 852.7  | 891.9   | 848.1   | 1028.9  | 1158.1  | 919.1  | 0.227047612 | 877.175   | 988.55   | 111.375  | 0.887334986 | 0.2205   | 1.124  |
| 99636_at   | 934.4   | 1035.5  | 1005.3 | 1006.7  | 988.2   | 1046.8  | 1054.4  | 969    | 0.550048218 | 995.475   | 1014.6   | 19.125   | 0.981150207 | 0.5528   | -1.019 |
| 99637_at   | 435.3   | 806.4   | 620.3  | 563.7   | 396.9   | 631.2   | 600     | 496.5  | 0.455900489 | 606.425   | 531.15   | 75.275   | 1.141720795 | 0.4801   | -1.132 |
| 99638_at   | 739.8   | 1274.8  | 972    | 881.4   | 1296.7  | 1202.5  | 1583.9  | 1022.9 | 0.106222588 | 967       | 1276.5   | 309.5    | 0.757540149 | 0.09782  | 1.33   |
| 99639_at   | 678.6   | 981.2   | 578.1  | 666.2   | 817.5   | 624.3   | 780.4   | 571    | 0.804010028 | 726.025   | 698.3    | 27.725   | 1.039703566 | 0.8398   | -1.03  |
| 99640_at   | 778.7   | 819.8   | 865.4  | 1025.5  | 649.6   | 894.9   | 732.8   | 930    | 0.44310575  | 872.35    | 801.825  | 70.525   | 1.087955601 | 0.4217   | -1.094 |
| 99641_at   | 334.9   | 378.7   | 422.6  | 284.7   | 573     | 374.8   | 448.6   | 330.8  | 0.265760805 | 355.225   | 431.8    | 76.575   | 0.822660954 | 0.2552   | 1.202  |
| 99642_i_at | 3710    | 4079.6  | 4165   | 5074.4  | 4720.7  | 5354.8  | 5717.3  | 4764.6 | 0.059159351 | 4257.25   | 5139.35  | 882.1    | 0.828363509 | 0.05483  | 1.211  |
| 99643_f_at | 3805.3  | 4970.4  | 4380.6 | 5332.5  | 5263.9  | 6460.5  | 5858.2  | 5356.7 | 0.044103654 | 4622.2    | 5734.825 | 1112.625 | 0.805987977 | 0.04609  | 1.247  |
| 99644_at   | 1010.1  | 969.4   | 852.2  | 927.8   | 954.3   | 870.8   | 1254.7  | 930.5  | 0.534823733 | 939.875   | 1002.575 | 62.7     | 0.937461038 | 0.547    | -1.058 |
| 99645_at   | 1335.7  | 1484.2  | 1380.7 | 1370.9  | 1117.5  | 1577.1  | 1497.2  | 1695   | 0.579384659 | 1392.875  | 1471.7   | 78.825   | 0.946439492 | 0.6579   | -1.045 |
| 99646_at   | 25.3    | 12.8    | 14.6   | 14.2    | 16.9    | 10.8    | 9.4     | 13.1   | 0.266438746 | 16.725    | 12.55    | 4.175    | 1.332669323 | 0.2212   | -1.314 |
| 99647_at   | 153.9   | 161.1   | 163    | 176.9   | 172     | 171.9   | 197.3   | 149.5  | 0.453450491 | 163.725   | 172.675  | 8.95     | 0.948168525 | 0.4656   | -1.051 |
| 99648_at   | 56.5    | 55      | 58.1   | 33.2    | 48.7    | 35.9    | 60.4    | 55.7   | 0.949370015 | 50.7      | 50.175   | 0.525    | 1.010463378 | 0.979    | -1.005 |
| 99649_at   | 311.3   | 320.1   | 336.5  | 350.8   | 343.2   | 473.7   | 393.3   | 351.8  | 0.13164543  | 329.675   | 390.5    | 60.825   | 0.844238156 | 0.08311  | 1.176  |
| 99650_at   | 1796.5  | 2854    | 2360.2 | 2648.8  | 2331.4  | 2716.1  | 2392.8  | 2277.9 | 0.955935174 | 2414.875  | 2429.55  | 14.675   | 0.993959787 | 0.8708   | -1.019 |
| 99651_at   | 888.7   | 868.4   | 844.1  | 818.3   | 875.3   | 661.7   | 717.9   | 810.5  | 0.158546852 | 854.875   | 766.35   | 88.525   | 1.115515104 | 0.1271   | -1.121 |



|            |         |         |         |         |         |         |         |         |             |           |          |          |             |          |        |
|------------|---------|---------|---------|---------|---------|---------|---------|---------|-------------|-----------|----------|----------|-------------|----------|--------|
| 99652_at   | 989.4   | 1229    | 1156    | 1007.8  | 1325.6  | 1117.9  | 1409.2  | 1153.8  | 0.136743502 | 1095.55   | 1251.625 | 156.075  | 0.875302107 | 0.133    | 1.142  |
| 99653_at   | 850.2   | 825.7   | 906.4   | 858.3   | 884.7   | 770.8   | 682.5   | 1004.2  | 0.752349651 | 860.15    | 835.55   | 24.6     | 1.029441685 | 0.6663   | -1.04  |
| 99654_s_at | 92.6    | 72.9    | 43.9    | 67.6    | 98.9    | 117.9   | 92.2    | 73.8    | 0.098948341 | 69.25     | 95.7     | 26.45    | 0.723615465 | 0.1096   | 1.411  |
| 99655_at   | 3027.5  | 2282.6  | 2818.7  | 2892.6  | 3007.3  | 3131.4  | 3394.9  | 3024.1  | 0.09846038  | 2755.35   | 3139.425 | 384.075  | 0.877660718 | 0.09655  | 1.144  |
| 99656_at   | 534.6   | 469.8   | 544.3   | 715.6   | 656.8   | 499.9   | 558.8   | 587     | 0.88321797  | 566.075   | 575.625  | 9.55     | 0.983409338 | 0.827    | -1.024 |
| 99657_at   | 49.9    | 38      | 39.6    | 52.9    | 17.3    | 19.1    | 31.7    | 71.2    | 0.481506373 | 45.1      | 34.825   | 10.275   | 1.295046662 | 0.2571   | -1.519 |
| 99658_f_at | 698.6   | 740.7   | 731.5   | 772.3   | 841.1   | 563.2   | 732.3   | 746.4   | 0.815892162 | 735.775   | 720.75   | 15.025   | 1.020846341 | 0.7391   | -1.031 |
| 99659_r_at | 38.9    | 30.3    | 24.2    | 19.1    | 33.9    | 19.2    | 33.4    | 31.2    | 0.82090255  | 28.125    | 29.425   | 1.3      | 0.955819881 | 0.7986   | -1.056 |
| 99660_f_at | 15296.8 | 16372.3 | 16138.7 | 14027.2 | 29203.2 | 13623.3 | 19600   | 15151.9 | 0.344845737 | 15458.75  | 19394.6  | 3935.85  | 0.797064647 | 0.3299   | 1.201  |
| 99661_r_at | 10589.9 | 10372.6 | 10218.8 | 7874.7  | 12234.3 | 7556.2  | 8150.7  | 8550.5  | 0.625620051 | 9764      | 9122.925 | 641.075  | 1.070270774 | 0.5583   | -1.082 |
| 99662_at   | 729     | 729.7   | 699.9   | 615.8   | 574.1   | 694.9   | 564.3   | 525.7   | 0.065926765 | 693.6     | 589.75   | 103.85   | 1.176091564 | 0.06099  | -1.18  |
| 99663_g_at | 1099.3  | 1408.3  | 1354.1  | 1156.7  | 978.3   | 1231.8  | 1124    | 1105.6  | 0.169409869 | 1254.6    | 1109.925 | 144.675  | 1.130346645 | 0.1659   | -1.128 |
| 99664_at   | 33.2    | 12.1    | 11.9    | 10.8    | 97.8    | 75.8    | 110.2   | 14.4    | 0.069597033 | 17        | 74.55    | 57.55    | 0.228034876 | 0.04633  | 3.884  |
| 99665_at   | 157.9   | 182.9   | 110.7   | 194.2   | 145.9   | 214.6   | 212.1   | 192.3   | 0.269198167 | 161.425   | 191.225  | 29.8     | 0.844162636 | 0.2876   | 1.198  |
| 99666_at   | 1750.3  | 1808.6  | 1742.8  | 1809.6  | 1514    | 1949.5  | 1868.2  | 1657.7  | 0.780970663 | 1777.825  | 1747.35  | 30.475   | 1.017440696 | 0.7184   | -1.022 |
| 99667_at   | 121.3   | 170.4   | 131.8   | 205.7   | 117.4   | 116     | 144.8   | 50.4    | 0.121488101 | 157.3     | 107.15   | 50.15    | 1.468035464 | 0.1513   | -1.541 |
| 99668_at   | 1581.4  | 1791.4  | 1579.6  | 1679.5  | 1897.3  | 1713    | 1885.8  | 1925    | 0.029775782 | 1657.975  | 1855.275 | 197.3    | 0.89365458  | 0.0305   | 1.119  |
| 99669_at   | 16122.3 | 16093.8 | 16024.8 | 14171.2 | 26973.2 | 13889.5 | 19382.4 | 13065.9 | 0.45972317  | 15603.025 | 18327.75 | 2724.725 | 0.851333361 | 0.5107   | 1.126  |
| 99670_at   | 317.2   | 315.1   | 258.5   | 271.2   | 423.7   | 237     | 346.1   | 253     | 0.625517565 | 290.5     | 314.95   | 24.45    | 0.92236863  | 0.7109   | -1.058 |
| 99671_at   | 13.1    | 18.6    | 9.9     | 28.8    | 19.5    | 13.9    | 11.7    | 18.5    | 0.726388455 | 17.6      | 15.9     | 1.7      | 1.106918239 | 0.8724   | -1.045 |
| 99672_at   | 604.1   | 560.8   | 568.4   | 565.2   | 576.9   | 608.9   | 623.9   | 736.5   | 0.172033946 | 574.625   | 636.55   | 61.925   | 0.902717776 | 0.1251   | -1.104 |
| 99674_at   | 692.1   | 749.8   | 778.8   | 704.5   | 715.6   | 629.4   | 670.4   | 697.3   | 0.101598271 | 731.3     | 678.175  | 53.125   | 1.078335238 | 0.1018   | -1.078 |
| 99675_at   | 701.4   | 917     | 725.6   | 850.3   | 647.8   | 857     | 810.2   | 688.7   | 0.527965335 | 798.575   | 750.925  | 47.65    | 1.063455072 | 0.5252   | -1.064 |
| 99677_at   | 457.4   | 422.8   | 566.2   | 591.8   | 512.4   | 531.8   | 475     | 633     | 0.611827453 | 509.55    | 538.05   | 28.5     | 0.947030945 | 0.585    | -1.06  |
| 99678_f_at | 80.5    | 106     | 126.8   | 127.1   | 99.9    | 124.6   | 86      | 161.2   | 0.708793372 | 110.1     | 117.925  | 7.825    | 0.933644265 | 0.7552   | -1.058 |
| 99681_at   | 43.2    | 29.8    | 66.4    | 32.5    | 51.6    | 48      | 52.4    | 44.9    | 0.511757239 | 42.975    | 49.225   | 6.25     | 0.873031996 | 0.3517   | 1.204  |
| 99699_at   | 5.2     | 2.9     | 4.1     | 4.8     | 16.3    | 4.4     | 7.1     | 3.4     | 0.315172803 | 4.25      | 7.8      | 3.55     | 0.544871795 | 0.2718   | 1.559  |
| 99700_at   | 54.4    | 48.5    | 26.1    | 52.1    | 9.3     | 57.1    | 46.6    | 56.5    | 0.83298941  | 45.275    | 42.375   | 2.9      | 1.068436578 | 0.6351   | -1.266 |
| 99701_f_at | 193.2   | 235.1   | 261.2   | 277.7   | 261.8   | 300.4   | 363.7   | 338.4   | 0.043729047 | 241.8     | 316.075  | 74.275   | 0.765008305 | 0.04582  | 1.309  |
| 99702_at   | 46.3    | 37.6    | 30.1    | 96.8    | 140.9   | 68.6    | 106.7   | 71.2    | 0.101244754 | 52.7      | 96.85    | 44.15    | 0.544140423 | 0.07198  | 1.95   |
| 99708_at   | 9.5     | 19.8    | 82.2    | 23.5    | 27      | 25      | 12.8    | 17.7    | 0.486438209 | 33.75     | 20.625   | 13.125   | 1.636363636 | 0.6695   | -1.24  |
| 99756_at   | 208.1   | 228.6   | 208.3   | 219.2   | 287.9   | 208.5   | 267.5   | 291.6   | 0.084863909 | 216.05    | 263.875  | 47.825   | 0.818758882 | 0.05582  | 1.212  |
| 99776_at   | 8.7     | 9.4     | 16.2    | 10.2    | 18      | 8.8     | 15.5    | 17.1    | 0.218582343 | 11.125    | 14.85    | 3.725    | 0.749158249 | 0.2365   | 1.33   |
| 99777_s_at | 166     | 93.6    | 150.4   | 134.5   | 104.9   | 109.1   | 106.5   | 110.8   | 0.166408873 | 136.125   | 107.825  | 28.3     | 1.262462323 | 0.1431   | -1.236 |
| 99778_at   | 1423.8  | 1386.1  | 1249.2  | 1293.8  | 2565.6  | 1342.5  | 1721.9  | 1322.9  | 0.263023969 | 1338.225  | 1738.225 | 400      | 0.769880194 | 0.2033   | 1.252  |
| 99779_at   | 69.4    | 75.4    | 110.6   | 114.6   | 109.5   | 105.9   | 101     | 80.8    | 0.633424748 | 92.5      | 99.3     | 6.8      | 0.931520645 | 0.5653   | -1.093 |
| 99798_at   | 18      | 34.1    | 37.7    | 19.3    | 11.8    | 36      | 5.9     | 39.4    | 0.701343617 | 27.275    | 23.275   | 4        | 1.171858217 | 0.4758   | -1.457 |
| 99799_at   | 44.6    | 58.2    | 25.5    | 21.8    | 10.6    | 31.4    | 52.9    | 19.6    | 0.503077703 | 37.525    | 28.625   | 8.9      | 1.310917031 | 0.4187   | -1.431 |
| 99800_at   | 32.1    | 45.3    | 36.4    | 10      | 16.7    | 32.4    | 38.3    | 33.1    | 0.92922678  | 30.95     | 30.125   | 0.825    | 1.027385892 | 0.8753   | -1.065 |
| 99801_at   | 26.7    | 30.7    | 36.2    | 11.7    | 8.8     | 32.7    | 15.1    | 25.8    | 0.473778363 | 26.325    | 20.6     | 5.725    | 1.277912621 | 0.489    | -1.33  |
| 99802_at   | 11.8    | 32      | 44.3    | 14.7    | 18.3    | 22.5    | 26      | 19.1    | 0.623923045 | 25.7      | 21.475   | 4.225    | 1.196740396 | 0.8889   | -1.048 |
| 99803_at   | 41.3    | 11.8    | 10.6    | 12.3    | 18.4    | 11.1    | 13.5    | 62.4    | 0.627258994 | 19        | 26.35    | 7.35     | 0.721062619 | 0.6347   | 1.286  |
| 99804_at   | 91.9    | 111.8   | 118.1   | 102.3   | 165.8   | 111     | 136.8   | 136.2   | 0.06041476  | 106.025   | 137.45   | 31.425   | 0.771371408 | 0.04193  | 1.289  |
| 99805_at   | 37.8    | 16.2    | 43.6    | 23.8    | 35.5    | 22.4    | 21.3    | 18.3    | 0.453619192 | 30.35     | 24.375   | 5.975    | 1.245128205 | 0.5235   | -1.198 |
| 99806_at   | 46.6    | 47.1    | 69.5    | 56.9    | 37.3    | 37      | 36.9    | 31.9    | 0.033692337 | 55.025    | 35.775   | 19.25    | 1.538085255 | 0.006213 | -1.52  |
| 99807_r_at | 142.6   | 58      | 129     | 105.8   | 109.5   | 173.7   | 82.6    | 116.1   | 0.678385265 | 108.85    | 120.475  | 11.625   | 0.903506952 | 0.6509   | 1.128  |
| 99808_at   | 43.5    | 52.3    | 23.1    | 53.3    | 61.1    | 73.3    | 88.5    | 98.8    | 0.014410571 | 43.05     | 80.425   | 37.375   | 0.535281318 | 0.02519  | 1.933  |
| 99809_at   | 64.5    | 59.8    | 98      | 56.6    | 60.1    | 73.5    | 30.4    | 41.1    | 0.222728048 | 69.725    | 51.275   | 18.45    | 1.359824476 | 0.1955   | -1.403 |
| 99810_at   | 120     | 133.9   | 117.8   | 109.7   | 187     | 112.2   | 167.9   | 139.1   | 0.151878563 | 120.35    | 151.55   | 31.2     | 0.794127351 | 0.1224   | 1.24   |
| 99811_at   | 25.1    | 28      | 21.8    | 36.1    | 47.4    | 25.5    | 44.7    | 45.4    | 0.082075772 | 27.75     | 40.75    | 13       | 0.680981595 | 0.08567  | 1.452  |
| 99812_at   | 29.6    | 33.4    | 38.9    | 31.1    | 47.2    | 37.6    | 41.6    | 30.4    | 0.206814046 | 33.25     | 39.2     | 5.95     | 0.848214286 | 0.2063   | 1.17   |
| 99813_g_at | 21.7    | 19.8    | 11      | 17.2    | 19.2    | 26.6    | 13.4    | 23.7    | 0.408624346 | 17.425    | 20.725   | 3.3      | 0.840772014 | 0.4504   | 1.189  |
| 99814_at   | 4.9     | 5.3     | 6.3     | 9.7     | 13.6    | 6.2     | 9.9     | 5.8     | 0.325035837 | 6.55      | 8.875    | 2.325    | 0.738028169 | 0.3105   | 1.322  |
| 99815_at   | 50.7    | 90.8    | 62.1    | 84.6    | 89.2    | 64.7    | 80.5    | 87.6    | 0.476072649 | 72.05     | 80.5     | 8.45     | 0.895031056 | 0.4328   | 1.139  |
| 99816_at   | 190.7   | 168.2   | 136.1   | 134.6   | 136.5   | 172.4   | 175.6   | 101.6   | 0.640377144 | 157.4     | 146.525  | 10.875   | 1.074219416 | 0.6041   | -1.088 |
| 99817_at   | 53.9    | 47.1    | 40.6    | 25.2    | 117.7   | 40.2    | 68.4    | 95.4    | 0.099817551 | 41.7      | 80.425   | 38.725   | 0.518495493 | 0.07411  | 1.857  |



|            |         |        |        |        |         |        |         |        |             |          |          |         |             |          |        |
|------------|---------|--------|--------|--------|---------|--------|---------|--------|-------------|----------|----------|---------|-------------|----------|--------|
| 99818_at   | 26.4    | 12.7   | 20.3   | 31.3   | 16.3    | 43.6   | 34.1    | 9.8    | 0.72615722  | 22.675   | 25.95    | 3.275   | 0.873795761 | 0.9444   | -1.029 |
| 99819_at   | 27.8    | 28.7   | 34.8   | 138.4  | 57.2    | 68.5   | 97      | 128.3  | 0.37929722  | 57.425   | 87.75    | 30.325  | 0.654415954 | 0.1841   | 1.888  |
| 99820_f_at | 279.7   | 254.1  | 250.7  | 291.7  | 249.8   | 246.8  | 238.6   | 221.1  | 0.051234312 | 269.05   | 239.075  | 29.975  | 1.125379065 | 0.04338  | -1.124 |
| 99821_at   | 3.8     | 3.2    | 1.9    | 2.2    | 4.5     | 2.3    | 3.7     | 3.2    | 0.347243301 | 2.775    | 3.425    | 0.65    | 0.810218978 | 0.3556   | 1.246  |
| 99823_r_at | 69.5    | 81.7   | 95.6   | 166.8  | 127.4   | 106.9  | 68.2    | 128.4  | 0.873979208 | 103.4    | 107.725  | 4.325   | 0.959851474 | 0.7853   | -1.071 |
| 99824_at   | 25.1    | 27.3   | 36.3   | 38.9   | 48.9    | 25.9   | 27      | 27.5   | 0.950250031 | 31.9     | 32.325   | 0.425   | 0.986852282 | 0.9706   | -1.007 |
| 99825_at   | 173     | 224.1  | 250.3  | 265.5  | 293.6   | 267.8  | 254.6   | 232.8  | 0.214781732 | 228.225  | 262.2    | 33.975  | 0.870423341 | 0.2137   | 1.16   |
| 99826_at   | 0.5     | 0.9    | 2.5    | 2.4    | 2.1     | 5.4    | 9.9     | 0.9    | 0.234531151 | 1.575    | 4.575    | 3       | 0.344262295 | 0.2211   | 2.486  |
| 99827_at   | 45.4    | 41.6   | 16.1   | 34.1   | 68.1    | 13.9   | 51.3    | 69.5   | 0.315219993 | 34.3     | 50.7     | 16.4    | 0.6765286   | 0.535    | 1.344  |
| 99828_at   | 176.5   | 174.8  | 179.6  | 183.1  | 171.6   | 227.8  | 193.9   | 239.6  | 0.152004209 | 178.5    | 208.225  | 29.725  | 0.857245768 | 0.1083   | 1.156  |
| 99829_at   | 16.6    | 20.5   | 20.2   | 6.6    | 10.3    | 27.5   | 11.1    | 11.1   | 0.860103923 | 15.975   | 15       | 0.975   | 1.065       | 0.8638   | -1.066 |
| 99830_at   | 29.6    | 3.2    | 19.1   | 3.3    | 22.7    | 16.9   | 2.3     | 28.3   | 0.67629799  | 13.8     | 17.55    | 3.75    | 0.786324786 | 0.6766   | 1.43   |
| 99831_at   | 111.7   | 126.9  | 115.7  | 116.3  | 106.2   | 120.8  | 124.5   | 78.4   | 0.411500534 | 117.65   | 107.475  | 10.175  | 1.09467318  | 0.3721   | -1.111 |
| 99832_at   | 50.3    | 16.8   | 13.7   | 10.5   | 15.4    | 33.1   | 9.8     | 12.3   | 0.6484566   | 22.825   | 17.65    | 5.175   | 1.293201133 | 0.7082   | -1.186 |
| 99833_at   | 82.1    | 69     | 117.3  | 96.2   | 90.5    | 95.9   | 118.6   | 141.6  | 0.23766015  | 91.15    | 111.65   | 20.5    | 0.816390506 | 0.2258   | 1.229  |
| 99834_at   | 8.9     | 4.1    | 4.8    | 12     | 22.1    | 5.1    | 1.7     | 4.2    | 0.877523219 | 7.45     | 8.275    | 0.825   | 0.900302115 | 0.6924   | -1.277 |
| 99835_at   | 9.8     | 38.9   | 15.8   | 8.3    | 11.7    | 31.4   | 9.6     | 17     | 0.93166093  | 18.2     | 17.425   | 0.775   | 1.044476327 | 0.9256   | -1.043 |
| 99836_at   | 25.9    | 51.6   | 82.6   | 45.5   | 146.9   | 56.6   | 41      | 106.8  | 0.241718872 | 51.4     | 87.825   | 36.425  | 0.585254768 | 0.2362   | 1.64   |
| 99837_at   | 47.8    | 79     | 78.7   | 126.7  | 101.4   | 56.2   | 37.9    | 61.3   | 0.406836301 | 83.05    | 64.2     | 18.85   | 1.293613707 | 0.3931   | -1.299 |
| 99838_at   | 4.9     | 7.4    | 31.3   | 4.3    | 15.1    | 6.2    | 16.2    | 49.1   | 0.433782331 | 11.975   | 21.65    | 9.675   | 0.553117783 | 0.3154   | 1.975  |
| 99839_at   | 9.2     | 4.7    | 16.9   | 7.6    | 8.5     | 11.2   | 13.8    | 44.8   | 0.330747285 | 9.6      | 19.575   | 9.975   | 0.490421456 | 0.2388   | 1.807  |
| 99840_at   | 137.9   | 216.2  | 172.5  | 172.7  | 292.6   | 116.2  | 167.1   | 273.8  | 0.454701848 | 174.825  | 212.425  | 37.6    | 0.822996352 | 0.5754   | 1.15   |
| 99841_at   | 66      | 6.5    | 43.3   | 10.5   | 24.7    | 24.4   | 37.1    | 19.3   | 0.742975434 | 31.575   | 26.375   | 5.2     | 1.197156398 | 0.7404   | 1.219  |
| 99842_at   | 49.5    | 45.5   | 41.6   | 70.4   | 37.4    | 37.4   | 45.2    | 58.3   | 0.411816311 | 51.75    | 44.575   | 7.175   | 1.160964666 | 0.3875   | -1.156 |
| 99843_at   | 25.2    | 27     | 36.1   | 76.3   | 136.7   | 63.8   | 45.4    | 34.3   | 0.32130034  | 41.15    | 70.05    | 28.9    | 0.587437545 | 0.2537   | 1.64   |
| 99844_at   | 99.2    | 128.9  | 138.7  | 145    | 217.7   | 131.7  | 167.3   | 132.8  | 0.195842262 | 127.95   | 162.375  | 34.425  | 0.787990762 | 0.171    | 1.255  |
| 99845_at   | 475     | 379    | 510.6  | 361.6  | 101.6   | 162.6  | 149.2   | 91.9   | 0.001192508 | 431.55   | 126.325  | 305.225 | 3.416188403 | 0.000267 | -3.481 |
| 99846_at   | 1.3     | 1.5    | 1.7    | 5.2    | 5.7     | 2.8    | 1.3     | 4.6    | 0.415780458 | 2.425    | 3.6      | 1.175   | 0.673611111 | 0.3875   | 1.534  |
| 99847_at   | 214.9   | 248.4  | 254.7  | 314.1  | 362.3   | 203.6  | 260.2   | 296.7  | 0.587473774 | 258.025  | 280.7    | 22.675  | 0.919219808 | 0.635    | -1.075 |
| 99848_at   | 4.8     | 15.9   | 18.9   | 20.8   | 44      | 34     | 27.7    | 34.1   | 0.006857908 | 15.1     | 34.95    | 19.85   | 0.43204578  | 0.03451  | 2.616  |
| 99849_at   | 10843.9 | 9036.5 | 9204   | 9514.8 | 8929.7  | 10221  | 11699.7 | 10652  | 0.346828966 | 9649.8   | 10375.6  | 725.8   | 0.930047419 | 0.3506   | -1.073 |
| 99850_at   | 16.3    | 21.7   | 11.3   | 36.4   | 5.5     | 11.2   | 10.1    | 29.6   | 0.371926608 | 21.425   | 14.1     | 7.325   | 1.519503546 | 0.2715   | -1.675 |
| 99851_at   | 1640.4  | 1017.3 | 1222.6 | 1647   | 848.5   | 1073.7 | 961.9   | 1356.8 | 0.149313405 | 1381.825 | 1060.225 | 321.6   | 1.30333184  | 0.1438   | -1.297 |
| 99854_at   | 2.6     | 1.9    | 9.8    | 2.6    | 4.7     | 1.1    | 2.7     | 4.5    | 0.657901399 | 4.225    | 3.25     | 0.975   | 1.3         | 0.7552   | -1.176 |
| 99855_at   | 98.4    | 165.7  | 139.8  | 131.1  | 111.9   | 143.6  | 135.7   | 309.1  | 0.436925288 | 133.75   | 175.075  | 41.325  | 0.763958304 | 0.4447   | 1.225  |
| 99856_r_at | 56.1    | 81.9   | 156.1  | 146.7  | 114.1   | 112.4  | 134.9   | 192    | 0.397096469 | 110.2    | 138.35   | 28.15   | 0.796530538 | 0.3356   | 1.333  |
| 99860_at   | 32.2    | 34.1   | 9      | 47.1   | 58.1    | 7.6    | 24.1    | 32.8   | 0.997106256 | 30.6     | 30.65    | 0.05    | 0.998368679 | 0.9015   | -1.075 |
| 99861_at   | 1448    | 1634.5 | 1714.8 | 1356.4 | 1458    | 1570.2 | 1323.7  | 1407.5 | 0.357024464 | 1538.425 | 1439.85  | 98.575  | 1.068461993 | 0.3616   | -1.066 |
| 99862_at   | 211.6   | 198.7  | 217.5  | 234.9  | 141.8   | 113.3  | 132.5   | 123.1  | 0.000125679 | 215.675  | 127.675  | 88      | 1.689250049 | 0.000116 | -1.692 |
| 99863_at   | 38.1    | 8.8    | 30.8   | 29.4   | 22.2    | 40.6   | 28.3    | 43.6   | 0.426793413 | 26.775   | 33.675   | 6.9     | 0.795100223 | 0.4123   | 1.382  |
| 99864_at   | 78.3    | 21.7   | 9.7    | 19.3   | 8.3     | 37.6   | 8       | 21     | 0.470707158 | 32.25    | 18.725   | 13.525  | 1.722296395 | 0.4628   | -1.57  |
| 99865_at   | 91.5    | 117.2  | 134.5  | 140.8  | 149.4   | 143.4  | 98.1    | 121.9  | 0.669211579 | 121      | 128.2    | 7.2     | 0.943837754 | 0.6836   | -1.06  |
| 99866_at   | 139.6   | 182.6  | 179.9  | 252.8  | 151.9   | 245.7  | 123     | 305    | 0.729491883 | 188.725  | 206.4    | 17.675  | 0.91436531  | 0.8516   | -1.049 |
| 99867_at   | 10.1    | 7.8    | 6.6    | 5.9    | 10.2    | 6.8    | 4.8     | 6.9    | 0.779487793 | 7.6      | 7.175    | 0.425   | 1.059233449 | 0.7232   | -1.075 |
| 99868_at   | 24.4    | 13.5   | 8.8    | 5.4    | 14.6    | 11.5   | 0.8     | 20     | 0.829692673 | 13.025   | 11.725   | 1.3     | 1.1108742   | 0.6074   | -1.542 |
| 99869_at   | 9.9     | 13.8   | 13.3   | 11.2   | 42.9    | 10.8   | 12.4    | 10.9   | 0.430002078 | 12.05    | 19.25    | 7.2     | 0.625974026 | 0.4451   | 1.324  |
| 99870_at   | 9.5     | 37.7   | 26.1   | 56.6   | 22.7    | 29.1   | 38.4    | 24.4   | 0.735603026 | 32.475   | 28.65    | 3.825   | 1.133507853 | 0.9225   | -1.041 |
| 99871_f_at | 97.8    | 92.7   | 153.5  | 175.5  | 123.4   | 140    | 180.8   | 154.3  | 0.446203706 | 129.875  | 149.625  | 19.75   | 0.868003342 | 0.3795   | 1.185  |
| 99872_s_at | 9580.5  | 9670.9 | 8036.6 | 8187.2 | 10347.6 | 9224.5 | 9354.6  | 8901.9 | 0.320349085 | 8868.8   | 9457.15  | 588.35  | 0.937787811 | 0.305    | -1.069 |
| 99873_at   | 9.9     | 7.8    | 11.1   | 12.4   | 19.6    | 12.7   | 14      | 13     | 0.062556332 | 10.3     | 14.825   | 4.525   | 0.694772344 | 0.04061  | 1.443  |
| 99874_at   | 73.9    | 113.6  | 104.8  | 141    | 51.2    | 175.5  | 120.3   | 179.6  | 0.517518093 | 108.325  | 131.65   | 23.325  | 0.822825674 | 0.7405   | -1.118 |
| 99875_at   | 119.1   | 121.6  | 201.5  | 158    | 134     | 122.8  | 136.7   | 171.1  | 0.703269427 | 150.05   | 141.15   | 8.9     | 1.063053489 | 0.7615   | -1.046 |
| 99876_at   | 15.3    | 14.9   | 23.9   | 18     | 14.7    | 21.8   | 25.6    | 19.8   | 0.456317594 | 18.025   | 20.475   | 2.45    | 0.88034188  | 0.4597   | 1.134  |
| 99878_at   | 175.7   | 131.4  | 144.6  | 144    | 155.5   | 185.2  | 135.1   | 108.2  | 0.882678356 | 148.925  | 146      | 2.925   | 1.020034247 | 0.8058   | -1.034 |
| 99880_at   | 26.5    | 29.1   | 35.5   | 57.6   | 35.6    | 21.5   | 34.6    | 17     | 0.288927979 | 37.175   | 27.175   | 10      | 1.367985281 | 0.2583   | -1.369 |
| 99881_at   | 3.9     | 14.2   | 5      | 6.1    | 6.2     | 12.4   | 8.2     | 9.7    | 0.528390601 | 7.3      | 9.125    | 1.825   | 0.8         | 0.3498   | 1.378  |



|            |        |        |        |        |        |        |        |        |             |          |         |         |             |          |        |
|------------|--------|--------|--------|--------|--------|--------|--------|--------|-------------|----------|---------|---------|-------------|----------|--------|
| 99882_at   | 55.7   | 63.2   | 50.2   | 75.5   | 111.2  | 66.1   | 36.1   | 89     | 0.446326512 | 61.15    | 75.6    | 14.45   | 0.808862434 | 0.6032   | 1.153  |
| 99883_g_at | 184.8  | 270.5  | 262.2  | 270.4  | 240.9  | 152.6  | 210.3  | 191.7  | 0.135283085 | 246.975  | 198.875 | 48.1    | 1.241860465 | 0.1541   | -1.243 |
| 99884_at   | 10     | 5.3    | 7      | 5.6    | 2.7    | 2.2    | 4.6    | 23.5   | 0.821633712 | 6.975    | 8.25    | 1.275   | 0.845454545 | 0.6169   | -1.339 |
| 99885_at   | 5.6    | 3.5    | 0.8    | 19.3   | 28.4   | 12.3   | 9      | 4.1    | 0.394755666 | 7.3      | 13.45   | 6.15    | 0.542750929 | 0.2649   | 2.604  |
| 99886_at   | 39.4   | 32.7   | 34.4   | 24.1   | 21     | 27.1   | 30.7   | 42.1   | 0.674087867 | 32.65    | 30.225  | 2.425   | 1.080231596 | 0.6211   | -1.097 |
| 99887_at   | 20.7   | 38.7   | 23     | 10.7   | 5.7    | 41.5   | 3.9    | 25.7   | 0.717050098 | 23.275   | 19.2    | 4.075   | 1.212239583 | 0.4338   | -1.698 |
| 99888_at   | 121.4  | 171.8  | 164.8  | 193.9  | 186.7  | 169.9  | 203.3  | 210.5  | 0.155904694 | 162.975  | 192.6   | 29.625  | 0.846183801 | 0.1584   | 1.195  |
| 99889_at   | 44.2   | 88.4   | 71.3   | 50.4   | 64.8   | 63.9   | 66.7   | 72.4   | 0.762961844 | 63.575   | 66.95   | 3.375   | 0.949589246 | 0.605    | -1.092 |
| 99890_at   | 82.5   | 105.2  | 88.9   | 115.8  | 70.9   | 90.6   | 97.4   | 89.5   | 0.293296503 | 98.1     | 87.1    | 11      | 1.126291619 | 0.3024   | -1.124 |
| 99891_at   | 36.1   | 74     | 25.8   | 58.2   | 14.9   | 52.3   | 30.8   | 13.4   | 0.195332898 | 48.525   | 27.85   | 20.675  | 1.742369838 | 0.1649   | -1.877 |
| 99892_at   | 16.2   | 10.7   | 15.3   | 16     | 13.2   | 11.5   | 10.2   | 12.5   | 0.129641365 | 14.55    | 11.85   | 2.7     | 1.227848101 | 0.1351   | -1.217 |
| 99893_at   | 63.3   | 105.3  | 81.7   | 100.2  | 16.7   | 47.7   | 41.7   | 39.8   | 0.006065926 | 87.625   | 36.475  | 51.15   | 2.402330363 | 0.01286  | -2.537 |
| 99894_at   | 36.6   | 54.5   | 70.7   | 90     | 52     | 53.5   | 38.9   | 36.6   | 0.222898533 | 62.95    | 45.25   | 17.7    | 1.391160221 | 0.2266   | -1.337 |
| 99895_at   | 17.8   | 13     | 14.6   | 21.7   | 23.4   | 15.7   | 15.6   | 25     | 0.357543418 | 16.775   | 19.925  | 3.15    | 0.841907152 | 0.3643   | 1.181  |
| 99896_at   | 108    | 137.1  | 91.8   | 128.3  | 124.5  | 89.7   | 123.3  | 156.1  | 0.691157989 | 116.3    | 123.4   | 7.1     | 0.942463533 | 0.7311   | -1.054 |
| 99897_at   | 47.8   | 77.2   | 82.8   | 43.7   | 100.1  | 83.3   | 52.1   | 105.2  | 0.204205708 | 62.875   | 85.175  | 22.3    | 0.738186087 | 0.2269   | 1.36   |
| 99898_at   | 22.6   | 22.3   | 27.3   | 31.8   | 29.2   | 28     | 45.9   | 30.7   | 0.182749003 | 26       | 33.45   | 7.45    | 0.777279522 | 0.1387   | 1.273  |
| 99899_at   | 98.9   | 19.7   | 26.4   | 24.4   | 21.5   | 84.1   | 74.1   | 24.6   | 0.738989326 | 42.35    | 51.075  | 8.725   | 0.829172785 | 0.6542   | 1.273  |
| 99900_at   | 24.1   | 27.1   | 44     | 116.3  | 81     | 82     | 63.2   | 75.4   | 0.376520862 | 52.875   | 75.4    | 22.525  | 0.701259947 | 0.1728   | 1.754  |
| 99901_at   | 147.6  | 184.7  | 182    | 190.7  | 170.1  | 214.3  | 126.7  | 161.4  | 0.709213205 | 176.25   | 168.125 | 8.125   | 1.048327138 | 0.6446   | -1.061 |
| 99902_at   | 3.7    | 1.3    | 2.7    | 3.5    | 2.1    | 2.7    | 6.9    | 4.3    | 0.369528762 | 2.8      | 4       | 1.2     | 0.7         | 0.4029   | 1.372  |
| 99903_at   | 5.9    | 6.8    | 28.1   | 6.7    | 41.1   | 30.6   | 18.1   | 12.4   | 0.156186198 | 11.875   | 25.55   | 13.675  | 0.464774951 | 0.0944   | 2.467  |
| 99904_at   | 44.5   | 27.2   | 35.5   | 48     | 46.2   | 41.4   | 54.9   | 18.6   | 0.876988491 | 38.8     | 40.275  | 1.475   | 0.963376785 | 0.9606   | -1.014 |
| 99905_at   | 25.6   | 16.3   | 3      | 24     | 5.2    | 28.9   | 6.7    | 11.6   | 0.602101784 | 17.225   | 13.1    | 4.125   | 1.314885496 | 0.7183   | -1.268 |
| 99906_at   | 62     | 74.1   | 62.7   | 62     | 122    | 139.7  | 182.9  | 90.7   | 0.03600858  | 65.2     | 133.825 | 68.625  | 0.487203437 | 0.003964 | 1.995  |
| 99907_at   | 5.8    | 10.1   | 10.9   | 13.8   | 17.8   | 9.1    | 25.8   | 9.9    | 0.264353519 | 10.15    | 15.65   | 5.5     | 0.6485623   | 0.256    | 1.475  |
| 99908_at   | 95.5   | 152    | 147.9  | 215.9  | 173.5  | 209.5  | 250.3  | 167.5  | 0.182523894 | 152.825  | 200.2   | 47.375  | 0.763361638 | 0.1706   | 1.347  |
| 99909_at   | 13.5   | 1.9    | 1.7    | 10.6   | 10.4   | 12.1   | 2.7    | 14     | 0.49036734  | 6.925    | 9.8     | 2.875   | 0.706632653 | 0.417    | 1.791  |
| 99910_at   | 118.6  | 178.4  | 122.4  | 96     | 133.3  | 182.7  | 132.5  | 192.6  | 0.233126784 | 128.85   | 160.275 | 31.425  | 0.803930744 | 0.2097   | 1.257  |
| 99911_at   | 17.5   | 15.7   | 8.7    | 46.4   | 25.5   | 13.3   | 15.7   | 15.6   | 0.633480398 | 22.075   | 17.525  | 4.55    | 1.259629101 | 0.8524   | -1.075 |
| 99912_at   | 14.8   | 21.4   | 55.7   | 29.8   | 41.8   | 19.3   | 31     | 19.7   | 0.822258003 | 30.425   | 27.95   | 2.475   | 1.088550984 | 0.9648   | -1.016 |
| 99913_at   | 129    | 134.3  | 136.6  | 101.5  | 123.5  | 93.9   | 108    | 140.5  | 0.518241164 | 125.35   | 116.475 | 8.875   | 1.076196609 | 0.5088   | -1.081 |
| 99914_at   | 38.5   | 48.3   | 14.9   | 21.7   | 62.9   | 44     | 10.8   | 39     | 0.554074005 | 30.85    | 39.175  | 8.325   | 0.787492023 | 0.7346   | 1.181  |
| 99915_at   | 12     | 19.8   | 14.2   | 13.8   | 36.9   | 17.3   | 1.6    | 16.2   | 0.706807042 | 14.95    | 18      | 3.05    | 0.830555556 | 0.7156   | -1.302 |
| 99916_at   | 45.3   | 32.4   | 43.7   | 45.7   | 9.6    | 54.4   | 56     | 56     | 0.862130219 | 41.775   | 44      | 2.225   | 0.949431818 | 0.7569   | -1.155 |
| 99917_at   | 806.8  | 1007.2 | 866.8  | 826.4  | 992.7  | 782.1  | 923.7  | 932.2  | 0.644108648 | 876.8    | 907.675 | 30.875  | 0.965984521 | 0.6445   | -1.035 |
| 99920_at   | 122.7  | 93.7   | 130.9  | 125    | 67.9   | 127.3  | 86.7   | 64.1   | 0.119602986 | 118.075  | 86.5    | 31.575  | 1.365028902 | 0.09653  | -1.407 |
| 99922_at   | 111.8  | 342.5  | 233.1  | 249.5  | 78.3   | 312.1  | 323.8  | 325.4  | 0.750573568 | 234.225  | 259.9   | 25.675  | 0.901212005 | 0.935    | -1.037 |
| 99923_at   | 256    | 229.6  | 204.4  | 293.2  | 318.1  | 239.2  | 274.6  | 214.3  | 0.612881188 | 245.8    | 261.55  | 15.75   | 0.939782068 | 0.6212   | -1.062 |
| 99924_at   | 381.3  | 643.9  | 501.5  | 428.8  | 657.2  | 580.5  | 789.8  | 513.1  | 0.126624728 | 488.875  | 635.15  | 146.275 | 0.769700071 | 0.1153   | 1.308  |
| 99925_f_at | 111.9  | 203.1  | 182.7  | 170.8  | 161.6  | 178.3  | 192.9  | 115    | 0.848181712 | 167.125  | 161.95  | 5.175   | 1.031954307 | 0.8865   | -1.026 |
| 99926_at   | 211.1  | 229.4  | 237.8  | 293.4  | 280.1  | 257    | 324.4  | 301.7  | 0.08307068  | 242.925  | 290.8   | 47.875  | 0.83536795  | 0.07671  | 1.202  |
| 99927_at   | 25     | 34.6   | 6      | 21.6   | 107.5  | 300.8  | 207.6  | 259.4  | 0.016907868 | 21.8     | 218.825 | 197.025 | 0.099622986 | 0.00164  | 11.15  |
| 99928_at   | 31     | 32.4   | 23.9   | 44.5   | 8.6    | 24.3   | 27.7   | 20.4   | 0.07736438  | 32.95    | 20.25   | 12.7    | 1.627160494 | 0.1086   | -1.734 |
| 99929_at   | 961.9  | 1107.3 | 999.6  | 1032.9 | 1243.5 | 1122.1 | 1037.5 | 1027.3 | 0.221182546 | 1025.425 | 1107.6  | 82.175  | 0.925808053 | 0.2071   | -1.078 |
| 99930_s_at | 271.9  | 260.9  | 235.5  | 281.6  | 311.9  | 290.2  | 242.2  | 385.9  | 0.232195181 | 262.475  | 307.55  | 45.075  | 0.853438465 | 0.2075   | 1.158  |
| 99931_at   | 157.9  | 242.3  | 158.2  | 193.9  | 221    | 297.4  | 315.7  | 257.2  | 0.026942326 | 188.075  | 272.825 | 84.75   | 0.689361312 | 0.02643  | 1.46   |
| 99932_at   | 77.8   | 273.2  | 93.9   | 47.7   | 208.2  | 64.2   | 86.3   | 64.8   | 0.789503429 | 123.15   | 105.875 | 17.275  | 1.163164109 | 0.8995   | -1.063 |
| 99933_at   | 668.4  | 917.2  | 765.6  | 685.8  | 423.6  | 803.2  | 589    | 548.2  | 0.13942003  | 759.25   | 591     | 168.25  | 1.284686971 | 0.1234   | -1.308 |
| 99934_at   | 827.9  | 1082.6 | 935    | 843.3  | 856.1  | 838.4  | 860.7  | 691.6  | 0.176868561 | 922.2    | 811.7   | 110.5   | 1.13613404  | 0.1702   | -1.134 |
| 99935_at   | 1360.2 | 1575.8 | 1366.8 | 1654   | 1464.2 | 1197.4 | 1211.3 | 1505.1 | 0.237593491 | 1489.2   | 1344.5  | 144.7   | 1.107623652 | 0.2333   | -1.11  |
| 99936_at   | 168.2  | 167.7  | 154    | 172.1  | 137.1  | 181.4  | 116    | 295.9  | 0.699724596 | 165.5    | 182.6   | 17.1    | 0.906352683 | 0.8779   | -1.034 |
| 99937_at   | 49     | 37.3   | 10.1   | 44.8   | 1.5    | 34.2   | 14.5   | 30.9   | 0.243052297 | 35.3     | 20.275  | 15.025  | 1.741060419 | 0.3144   | -2.447 |
| 99938_at   | 305    | 316.6  | 305.1  | 296.9  | 313.3  | 317.3  | 324.9  | 333.8  | 0.035684788 | 305.9    | 322.325 | 16.425  | 0.949042116 | 0.03492  | -1.054 |
| 99939_at   | 320    | 231.1  | 318.2  | 235.4  | 347.5  | 280.9  | 318.5  | 330.4  | 0.193841077 | 276.175  | 319.325 | 43.15   | 0.864871213 | 0.1784   | 1.167  |
| 99940_at   | 686.8  | 868.6  | 748.4  | 766.8  | 626.3  | 767.2  | 783.9  | 780    | 0.615536687 | 767.65   | 739.35  | 28.3    | 1.038276865 | 0.6178   | -1.039 |



|            |       |       |       |        |       |        |       |        |             |         |         |         |             |            |        |
|------------|-------|-------|-------|--------|-------|--------|-------|--------|-------------|---------|---------|---------|-------------|------------|--------|
| 99941_at   | 7     | 32.8  | 16.9  | 57.6   | 13.8  | 34.4   | 12.6  | 65.9   | 0.858469185 | 28.575  | 31.675  | 3.1     | 0.902131018 | 0.8227     | 1.151  |
| 99942_s_at | 325.5 | 365.2 | 361.6 | 285.9  | 303   | 351.8  | 228.7 | 104.6  | 0.204428906 | 334.55  | 247.025 | 87.525  | 1.354316365 | 0.2041     | -1.482 |
| 99944_at   | 59.2  | 33.1  | 51.1  | 61.8   | 76.6  | 134.8  | 96.3  | 86.7   | 0.02511637  | 51.3    | 98.6    | 47.3    | 0.520283976 | 0.01256    | 1.932  |
| 99945_at   | 151   | 123.5 | 161.8 | 138.9  | 170.2 | 122.1  | 182.5 | 158.1  | 0.391698921 | 143.8   | 158.225 | 14.425  | 0.908832359 | 0.428      | -1.094 |
| 99947_at   | 636.6 | 872.9 | 666.8 | 752.1  | 728.1 | 890.5  | 943.9 | 809.7  | 0.169386787 | 732.1   | 843.05  | 110.95  | 0.86839452  | 0.1635     | 1.155  |
| 99948_at   | 167.3 | 260.3 | 249.3 | 202.2  | 142.9 | 171.3  | 172   | 199.5  | 0.110076341 | 219.775 | 171.425 | 48.35   | 1.282047543 | 0.0984     | -1.271 |
| 99949_at   | 383.4 | 616.8 | 406.2 | 422.7  | 444   | 482.5  | 388.3 | 324.6  | 0.490253111 | 457.275 | 409.85  | 47.425  | 1.115713066 | 0.4887     | -1.107 |
| 99950_at   | 413.7 | 282.2 | 258.8 | 340.9  | 320.9 | 309.3  | 330.4 | 324.2  | 0.942961458 | 323.9   | 321.2   | 2.7     | 1.008405978 | 0.9433     | -1.008 |
| 99951_at   | 44.3  | 69.9  | 19.8  | 51.4   | 66.3  | 142.4  | 159.9 | 78.6   | 0.058925171 | 46.35   | 111.8   | 65.45   | 0.414579606 | 0.03946    | 2.474  |
| 99952_at   | 10.7  | 16.7  | 6.3   | 2      | 18    | 1.5    | 6.5   | 18.3   | 0.697686821 | 8.925   | 11.075  | 2.15    | 0.805869074 | 0.905      | -1.098 |
| 99953_at   | 177.3 | 451.2 | 403.7 | 290.1  | 323   | 346.3  | 434.5 | 304.9  | 0.764580526 | 330.575 | 352.175 | 21.6    | 0.938666856 | 0.6266     | 1.121  |
| 99954_at   | 745.3 | 784.6 | 835   | 847.6  | 913   | 720.4  | 860   | 1032.1 | 0.32208456  | 803.125 | 881.375 | 78.25   | 0.911218267 | 0.3263     | -1.09  |
| 99955_at   | 463.3 | 400.5 | 378.2 | 555.7  | 315.4 | 536.2  | 418.3 | 514.8  | 0.961430847 | 449.425 | 446.175 | 3.25    | 1.007284137 | 0.9123     | -1.017 |
| 99956_at   | 177.1 | 224   | 182   | 204.5  | 123.2 | 270    | 325.6 | 275.1  | 0.325916096 | 196.9   | 248.475 | 51.575  | 0.792433846 | 0.463      | 1.192  |
| 99957_at   | 62    | 164.7 | 134.8 | 70.4   | 25.2  | 128.2  | 27.4  | 110.2  | 0.37575913  | 107.975 | 72.75   | 35.225  | 1.48419244  | 0.2936     | -1.775 |
| 99958_at   | 335.8 | 214.4 | 419.4 | 207.6  | 292.1 | 157.6  | 195   | 276.5  | 0.33710968  | 294.3   | 230.3   | 64      | 1.277898393 | 0.3455     | -1.261 |
| 99959_at   | 169.9 | 189.1 | 172.7 | 167    | 121.9 | 238.5  | 184.2 | 193.7  | 0.711448716 | 174.675 | 184.575 | 9.9     | 0.946363267 | 0.8496     | -1.029 |
| 99960_at   | 547.2 | 342.9 | 437.3 | 544.1  | 288.5 | 411.1  | 454.8 | 638.7  | 0.831201527 | 467.875 | 448.275 | 19.6    | 1.043723161 | 0.754      | -1.067 |
| 99961_s_at | 474.6 | 523.8 | 429.9 | 519.6  | 376   | 525.6  | 481.8 | 452.5  | 0.496707721 | 486.975 | 458.975 | 28      | 1.061005501 | 0.4819     | -1.066 |
| 99962_at   | 353.8 | 394.9 | 390.3 | 397.2  | 247.2 | 335.7  | 333.1 | 302.1  | 0.022183935 | 384.05  | 304.525 | 79.525  | 1.261144405 | 0.0205     | -1.269 |
| 99963_at   | 143.3 | 130.3 | 156.7 | 171.4  | 181.2 | 155    | 152.1 | 122.2  | 0.888281366 | 150.425 | 152.625 | 2.2     | 0.985585586 | 0.9242     | -1.01  |
| 99964_at   | 16    | 10.6  | 5.5   | 7.4    | 9.1   | 8.3    | 6.7   | 9.5    | 0.573973983 | 9.875   | 8.4     | 1.475   | 1.175595238 | 0.7197     | -1.096 |
| 99965_at   | 79.5  | 41    | 96.1  | 73.4   | 23.7  | 42.1   | 46.9  | 53.3   | 0.069057178 | 72.5    | 41.5    | 31      | 1.746987952 | 0.07332    | -1.743 |
| 99966_at   | 13.2  | 10.7  | 15    | 12.1   | 8.9   | 14.4   | 10.4  | 19.1   | 0.863776169 | 12.75   | 13.2    | 0.45    | 0.965909091 | 0.9898     | -1.002 |
| 99970_at   | 84.4  | 149.9 | 97    | 145.4  | 94.9  | 124.1  | 107.8 | 109    | 0.596383584 | 119.175 | 108.95  | 10.225  | 1.09385039  | 0.6955     | -1.065 |
| 99972_at   | 15.4  | 19.2  | 5.9   | 9.3    | 23.4  | 30.5   | 5.2   | 50.3   | 0.210132353 | 12.45   | 27.35   | 14.9    | 0.455210238 | 0.3105     | 1.847  |
| 99973_s_at | 11.5  | 16.1  | 10.1  | 9.9    | 21.1  | 25.6   | 33    | 11.4   | 0.090732136 | 11.9    | 22.775  | 10.875  | 0.522502744 | 0.05591    | 1.82   |
| 99974_at   | 4.8   | 6.8   | 1.8   | 6.5    | 1.8   | 1.5    | 5.4   | 1.7    | 0.16154002  | 4.975   | 2.6     | 2.375   | 1.913461538 | 0.1614     | -1.971 |
| 99975_at   | 591.4 | 580.4 | 653   | 617.9  | 753.3 | 704    | 745   | 648.6  | 0.015307876 | 610.675 | 712.725 | 102.05  | 0.856817145 | 0.01177    | 1.166  |
| 99977_at   | 78.2  | 76.6  | 90.9  | 105.8  | 114.1 | 75.3   | 69.9  | 79.1   | 0.796781676 | 87.875  | 84.6    | 3.275   | 1.038711584 | 0.7291     | -1.049 |
| 99978_s_at | 825.2 | 963   | 932.7 | 1107.1 | 894.3 | 1005.7 | 939.2 | 1168   | 0.610856521 | 957     | 1001.8  | 44.8    | 0.955280495 | 0.6023     | -1.047 |
| 99979_at   | 520   | 413.3 | 350.4 | 314.4  | 403.2 | 644.5  | 676.3 | 635.4  | 0.053157294 | 399.525 | 589.85  | 190.325 | 0.67733322  | 0.05494    | 1.474  |
| 99980_at   | 96    | 99.3  | 74.9  | 83.3   | 63.3  | 49.9   | 94.5  | 124.2  | 0.774966131 | 88.375  | 82.975  | 5.4     | 1.065079843 | 0.5992     | -1.126 |
| 99981_at   | 38.2  | 80.7  | 53.1  | 82.1   | 86.6  | 73.9   | 102.9 | 78.1   | 0.142890835 | 63.525  | 85.375  | 21.85   | 0.744070278 | 0.1402     | 1.399  |
| 99982_at   | 325.7 | 430.5 | 453.4 | 377    | 416.3 | 373.3  | 372.3 | 345.5  | 0.567271015 | 396.65  | 376.85  | 19.8    | 1.052540799 | 0.6058     | -1.046 |
| 99984_at   | 95.9  | 88.3  | 110.9 | 91.3   | 82.4  | 126.8  | 72.1  | 102    | 0.955474732 | 96.6    | 95.825  | 0.775   | 1.00808766  | 0.8452     | -1.028 |
| 99985_at   | 621.7 | 923.9 | 571.5 | 650.7  | 684.2 | 815.4  | 687.8 | 841    | 0.501191514 | 691.95  | 757.1   | 65.15   | 0.913947959 | 0.4196     | -1.109 |
| 99986_at   | 515.4 | 379.2 | 583.6 | 485.6  | 424.8 | 488.2  | 410.2 | 346.9  | 0.209909691 | 490.95  | 417.525 | 73.425  | 1.175857733 | 0.2189     | -1.17  |
| 99987_at   | 111   | 158.1 | 137.3 | 73.7   | 73.9  | 119.8  | 70.5  | 70.7   | 0.154895369 | 120.025 | 83.725  | 36.3    | 1.433562257 | 0.1488     | -1.417 |
| 99988_at   | 346.7 | 422.6 | 373.7 | 358    | 334.4 | 391.2  | 318.8 | 453.2  | 0.981530882 | 375.25  | 374.4   | 0.85    | 1.002270299 | 0.9237     | -1.009 |
| 99990_at   | 745.5 | 723.2 | 726.6 | 978.5  | 664.8 | 870.9  | 896.2 | 1079.5 | 0.455046757 | 793.45  | 877.85  | 84.4    | 0.903856012 | 0.4724     | 1.099  |
| 99991_at   | 87.2  | 137.8 | 137.7 | 161.9  | 103.9 | 196.6  | 170.6 | 171.3  | 0.291044483 | 131.15  | 160.6   | 29.45   | 0.816625156 | 0.3406     | 1.222  |
| 99992_at   | 204.2 | 279.1 | 258.9 | 248.4  | 302.2 | 262.4  | 333.5 | 295.5  | 0.056658475 | 247.65  | 298.4   | 50.75   | 0.829926273 | 0.06246    | 1.208  |
| 99993_at   | 121.3 | 158.5 | 160.3 | 119.9  | 70.1  | 126.6  | 131.4 | 134.5  | 0.250058494 | 140     | 115.65  | 24.35   | 1.21054907  | 0.2694     | -1.239 |
| 99994_at   | 706.7 | 568.4 | 608.8 | 578.7  | 53.2  | 64.5   | 85    | 98.7   | 0.000161125 | 615.65  | 75.35   | 540.3   | 8.170537492 | 0.00000678 | -8.375 |
| 99995_at   | 46.5  | 19.9  | 39.3  | 42.9   | 48.7  | 40.4   | 49.2  | 39.8   | 0.316381918 | 37.15   | 44.525  | 7.375   | 0.834362718 | 0.309      | 1.253  |
| 99996_at   | 8.5   | 8.4   | 11.8  | 4.2    | 18.9  | 9.6    | 15.9  | 10.9   | 0.085533056 | 8.225   | 13.825  | 5.6     | 0.594936709 | 0.08813    | 1.734  |
| 99997_at   | 170.5 | 142.4 | 207.1 | 175.7  | 181.4 | 163.9  | 164.5 | 162.5  | 0.699093485 | 173.925 | 168.075 | 5.85    | 1.03480589  | 0.7552     | -1.027 |
| 99998_at   | 10.6  | 21.1  | 13.8  | 12     | 22.9  | 14.4   | 14.4  | 23.8   | 0.244916699 | 14.375  | 18.875  | 4.5     | 0.761589404 | 0.223      | 1.32   |
| 99999_at   | 972.9 | 649   | 745.7 | 837.2  | 479.4 | 616.4  | 745.3 | 708.6  | 0.122755461 | 801.2   | 637.425 | 163.775 | 1.256932188 | 0.1273     | -1.261 |
