# Supplementary material
Source: publisher figshare collection journal article supplement (https://karger.figshare.com/articles/dataset/_/5104510)
Supplement: Supplementary file 2 [file 1 › Suppl_TablesS1-2_Legend.pdf]

**Farioglu et al Supplementary Table Legends**

**Table S1 Postnatal Day 1 (P1) Data**

**Column A:** Affymetrix MGU74Av2 probe set ID

**Column B:** Expression Values WT P1 sample UCF2

**Column C:** Expression Values WT P1 sample UCF3

**Column D:** Expression Values WT P1 sample UCF4

**Column E:** Expression Values WT P1 sample UCF16

**Column F:** Expression Values Dmrt1 KO P1 sample UCF5

**Column G:** Expression Values Dmrt1 KO P1 sample UCF6

**Column H:** Expression Values Dmrt1 KO P1 sample UCF14

**Column I:** Expression Values Dmrt1 KO P1 sample UCF15

**Column J:** Microsoft Excel Students T-Test calculation for WT vs. Dmrt1 KO

**Column K:** Mean Expression Value for WT samples (Average)

**Column L:** Mean Expression Value for KO samples (Average)

**Column M:** Delta is the absolute value of difference between Average Expression Values of WT and KO

**Column N:** Divisional Fold Change of WT/KO. Gene down regulated in the Dmrt1 KO give a value >1. Genes up regulated in the Dmrt1KO give a value of <1.

**Column O:** Genedata Expressionist T-Test Value, calculated using log<sub>2</sub> of Expression Values

**Column P:** Genedata Expressionist Fold Change, based on the ratio of the mean log<sub>2</sub> of each group. Genes down regulated in the Dmrt1 KO give a value negative (-) value. Genes up regulated in the Dmrt1KO give a positive (+) value.

**Column Q:** Gene Description

**Table S2 Postnatal Day 2 (P2) Data**

**Column A:** Affymetrix MGU74Av2 probe set ID

**Column B:** Expression Values WT P1 sample UCF

**Column C:** Expression Values WT P1 sample UCF3

**Column D:** Expression Values WT P1 sample UCF4

**Column E:** Expression Values WT P1 sample UCF16

**Column F:** Expression Values Dmrt1 KO P1 sample UCF5

**Column G:** Expression Values Dmrt1 KO P1 sample UCF6

**Column H:** Expression Values Dmrt1 KO P1 sample UCF14

**Column I:** Expression Values Dmrt1 KO P1 sample UCF15

**Column J:** Microsoft Excel Students T-Test calculation for WT vs. Dmrt1 KO

**Column K:** Mean Expression Value for WT samples (Average)

**Column L:** Mean Expression Value for KO samples (Average)

**Column M:** Delta is the absolute value of difference between Average Expression Values of WT and KO

**Column N:** Divisional Fold Change of WT/KO. Gene down regulated in the Dmrt1 KO give a value >1. Genes up regulated in the Dmrt1KO give a value of <1.

**Column O:** Genedata Expressionist T-Test Value, calculated using log<sub>2</sub> of Expression Values

**Column P:** Genedata Expressionist Fold Change, based on the ratio of the mean log<sub>2</sub> of each group. Genes down regulated in the Dmrt1 KO give a value negative (-) value. Genes up regulated in the Dmrt1KO give a positive (+) value.

**Column Q:** Gene Description
